# Supplementary material for: Oral administration of Akkermansia muciniphila elevates systemic antiaging and anticancer metabolites
Source: Aging (Albany NY). 2021 Mar 2;13(5):6375–405. doi: 10.18632/aging.202739 (PMC7993698; doi:10.18632/aging.202739)
Supplement: Supplementary Table 1 [file aging-13-202739-s002.xlsx]

## Sheet: SampleInfos
Supplementary Table 1. Related to Figure 2 and Supplementary Figure 1. Targeted metabolomics analysis from ILEUM samples from mice receiving oral gavages with several commensals or PBS (control), or continuous ATB, at days 3, 7 and 14 after the first oral gavage.
Sid	sType	InjOrder	Grp	Color
BlM-exp3-ileon_pre	Bl	5	-	-
BlM_exp3-ileon_pre	Bl	25	-	-
BlM-exp3-ileon_post	Bl	55	-	-
BlM-exp2-ileon_pre	Bl	63	-	-
BlM_exp2-ileon_4a	Bl	74	-	-
BlM_exp2-ileon_pre	Bl	85	-	-
BlM_exp1-ileon_pre	Bl	123	-	-
BlM_exp3-ileon_post	Bl	173	-	-
BlM-exp2-ileon_post	Bl	216	-	-
BlM-exp1-ileon_5a	Bl	224	-	-
BlM_exp2-ileon_4b	Bl	234	-	-
BlM_exp2-ileon_post	Bl	242	-	-
BlM_exp1-ileon_post	Bl	256	-	-
BlM-exp1-ileon_5b	Bl	320	-	-
BMl_-exp1-ileon_post	Bl	324	-	-
QC-exp3-ileon_5a	QC	7	-	-
QC_exp123-ileon_pre.baileon3	QC	8	-	-
QC-exp3-ileon_5b	QC	10	-	-
QC-exp3-ileon_5c	QC	11	-	-
QC-exp3-ileon_5d	QC	12	-	-
QC_exp3-ileon_6a	QC	13	-	-
QC-exp3-ileon_5e	QC	16	-	-
QC_exp3-ileon_6b	QC	19	-	-
QC_exp3-ileon_5a	QC	27	-	-
QC-exp3-ileon_5f	QC	29	-	-
QC_exp3-ileon_6c	QC	32	-	-
QC_exp3-ileon_5b	QC	41	-	-
QC-exp3-ileon_5g	QC	46	-	-
QC_exp3-ileon_6d	QC	50	-	-
QC-exp3-ileon_5h	QC	52	-	-
QC_exp123-ileon_post.baileon3	QC	58	-	-
QC-exp2-ileon_5a	QC	66	-	-
QC_exp3-ileon_5c	QC	69	-	-
QC_exp123-ileon_6a	QC	76	-	-
QC_exp2-ileon_5e	QC	79	-	-
QC_exp2-ileon_5a	QC	83	-	-
QC-exp2-ileon_5b	QC	90	-	-
QC_exp2-ileon_5f	QC	105	-	-
QC_exp2-ileon_5b	QC	108	-	-
QC-exp2-ileon_5c	QC	113	-	-
QC_exp3-ileon_5d	QC	121	-	-
QC_exp1-ileon_5a	QC	128	-	-
QC_exp2-ileon_5c	QC	135	-	-
QC-exp2-ileon_5d	QC	136	-	-
QC_exp2-ileon_5g	QC	143	-	-
QC_exp1-ileon_5b	QC	148	-	-
QC-exp2-ileon_5e	QC	154	-	-
QC_exp1-ileon_5c	QC	172	-	-
QC_exp2-ileon_5d	QC	176	-	-
QC_exp1-ileon_6a	QC	177	-	-
QC_exp3-ileon_5e	QC	178	-	-
QC-exp2-ileon_5f	QC	183	-	-
QC_exp1-ileon_5d	QC	196	-	-
QC_exp3-ileon_5f	QC	201	-	-
QC_exp1-ileon_6b	QC	203	-	-
QC-exp2-ileon_5g	QC	213	-	-
QC_batch-exp123-exp1-ileon_SF_8a	QC	227	-	-
QC_batch-exp1-ileon_SF_7a	QC	229	-	-
QC_exp123-ileon_6b	QC	230	-	-
QC_exp1-ileon_6c	QC	231	-	-
QC_exp3-ileon_5g	QC	232	-	-
QC_exp123-ileon_pre.baileon1	QC	248	-	-
QC_exp1-ileon_5e	QC	254	-	-
QC_batch-exp1-ileon_SF_7b	QC	260	-	-
QC_exp1-ileon_6d	QC	262	-	-
QC_exp1-ileon_5f	QC	269	-	-
QC_batch-exp1-ileon_SF_7c	QC	281	-	-
QC_exp1-ileon_5g	QC	283	-	-
QC_exp1-ileon_5h	QC	296	-	-
QC_batch-exp1-ileon_SF_7d	QC	298	-	-
QC_exp2-ileon_6a	QC	308	-	-
QC_batch-exp1-ileon_SF_7e	QC	309	-	-
QC_exp2-ileon_6b	QC	310	-	-
QC_batch-exp1-ileon_SF_7f	QC	311	-	-
QC_exp123-ileon_post.baileon1	QC	312	-	-
QC_exp2-ileon_6c	QC	313	-	-
QC_batch-exp1-ileon_SF_7g	QC	314	-	-
QC_exp1-ileon_5i	QC	316	-	-
QC_batch-exp1-ileon_SF_7h	QC	317	-	-
QC_batch-exp123-exp1-ileon_SF_8b	QC	318	-	-
QC_exp2-ileon_6d	QC	319	-	-
QC_exp1-ileon_5jb	QC	323	-	-
Nacl-j3-exp3-ileon_267	Sa	9	Nacl j3 exp3 ileon	#41AB5D
FECES-j3-exp3-ileon_280	Sa	14	FECES j3 exp3 ileon	#DF65B0
ATB-j7-exp3-ileon_297	Sa	15	ATB j7 exp3 ileon	#EF3B2C
AKKERMANSIA-j14-exp3-ileon_327	Sa	17	AKKER j14 exp3 ileon	#4D9221
Nacl-j7-exp3-ileon_291	Sa	18	Nacl j7 exp3 ileon	#006D2C
ATB-j3-exp3-ileon_273	Sa	20	ATB j3 exp3 ileon	#FB6A4A
FECES-j7-exp3-ileon_304	Sa	21	FECES j7 exp3 ileon	#BB3279
ATB-j14-exp3-ileon_314	Sa	22	ATB j14 exp3 ileon	#A50F15
FECES-j14-exp3-ileon_323	Sa	23	FECES j14 exp3 ileon	#980043
Nacl-j3-exp3-ileon_269	Sa	24	Nacl j3 exp3 ileon	#41AB5D
FECES-j7-exp3-ileon_301	Sa	26	FECES j7 exp3 ileon	#BB3279
ATB-j3-exp3-ileon_272	Sa	28	ATB j3 exp3 ileon	#FB6A4A
AKKERMANSIA-j14-exp3-ileon_329	Sa	30	AKKER j14 exp3 ileon	#4D9221
Nacl-j7-exp3-ileon_290	Sa	31	Nacl j7 exp3 ileon	#006D2C
FECES-j3-exp3-ileon_278	Sa	33	FECES j3 exp3 ileon	#DF65B0
AKKERMANSIA-j3-exp3-ileon_284	Sa	34	AKKER j3 exp3 ileon	#B8E186
ATB-j7-exp3-ileon_296	Sa	35	ATB j7 exp3 ileon	#EF3B2C
Nacl-j3-exp3-ileon_268	Sa	36	Nacl j3 exp3 ileon	#41AB5D
AKKERMANSIA-j14-exp3-ileon_325	Sa	37	AKKER j14 exp3 ileon	#4D9221
ATB-j3-exp3-ileon_275	Sa	38	ATB j3 exp3 ileon	#FB6A4A
AKKERMANSIA-j3-exp3-ileon_286	Sa	39	AKKER j3 exp3 ileon	#B8E186
FECES-j7-exp3-ileon_305	Sa	40	FECES j7 exp3 ileon	#BB3279
AKKERMANSIA-j7-exp3-ileon_310	Sa	42	AKKER j7 exp3 ileon	#7FBC41
ATB-j14-exp3-ileon_317	Sa	43	ATB j14 exp3 ileon	#A50F15
Nacl-j7-exp3-ileon_292	Sa	44	Nacl j7 exp3 ileon	#006D2C
AKKERMANSIA-j7-exp3-ileon_307	Sa	45	AKKER j7 exp3 ileon	#7FBC41
FECES-j14-exp3-ileon_322	Sa	47	FECES j14 exp3 ileon	#980043
ATB-j7-exp3-ileon_299	Sa	48	ATB j7 exp3 ileon	#EF3B2C
AKKERMANSIA-j3-exp3-ileon_283	Sa	51	AKKER j3 exp3 ileon	#B8E186
FECES-j7-exp3-ileon_302	Sa	54	FECES j7 exp3 ileon	#BB3279
Nacl-j3-exp3-ileon_270	Sa	56	Nacl j3 exp3 ileon	#41AB5D
AKKERMANSIA-j14-exp3-ileon_328	Sa	60	AKKER j14 exp3 ileon	#4D9221
FECES-j3-exp3-ileon_281	Sa	65	FECES j3 exp3 ileon	#DF65B0
ATB-j3-exp3-ileon_271	Sa	68	ATB j3 exp3 ileon	#FB6A4A
FECES-j14-exp3-ileon_324	Sa	71	FECES j14 exp3 ileon	#980043
AKKERMANSIA-j7-exp3-ileon_308	Sa	73	AKKER j7 exp3 ileon	#7FBC41
Nacl-j3-exp3-ileon_266	Sa	75	Nacl j3 exp3 ileon	#41AB5D
ATB-j14-exp3-ileon_316	Sa	77	ATB j14 exp3 ileon	#A50F15
AKKERMANSIA-j3-exp3-ileon_287	Sa	78	AKKER j3 exp3 ileon	#B8E186
FECES-j7-exp3-ileon_303	Sa	80	FECES j7 exp3 ileon	#BB3279
Nacl-j3-exp2-ileon_266	Sa	81	Nacl j3 exp2 ileon	#41AB5D
ATB-j7-exp3-ileon_298	Sa	82	ATB j7 exp3 ileon	#EF3B2C
ATB-j3-exp2-ileon_274	Sa	84	ATB j3 exp2 ileon	#FB6A4A
AKKERMANSIA-j14-exp3-ileon_326	Sa	86	AKKER j14 exp3 ileon	#4D9221
MITSUAKI-j3-exp2-ileon_286	Sa	87	MITSUAKI j3 exp2 ileon	#FD8D3C
Nacl-j7-exp3-ileon_289	Sa	88	Nacl j7 exp3 ileon	#006D2C
MITSUAKI-j7-exp2-ileon_310	Sa	89	MITSUAKI j7 exp2 ileon	#D1611F
FECES-j3-exp3-ileon_279	Sa	91	FECES j3 exp3 ileon	#DF65B0
BURKO-j3-exp2-ileon_280	Sa	92	BURKO j3 exp2 ileon	#80CDC1
AKKERMANSIA-j7-exp3-ileon_309	Sa	93	AKKER j7 exp3 ileon	#7FBC41
ATB-j14-exp2-ileon_317	Sa	94	ATB j14 exp2 ileon	#A50F15
ATB-j3-exp3-ileon_274	Sa	95	ATB j3 exp3 ileon	#FB6A4A
Nacl-j7-exp2-ileon_293	Sa	96	Nacl j7 exp2 ileon	#006D2C
AKKERMANSIA-j14-exp3-ileon_330	Sa	97	AKKER j14 exp3 ileon	#4D9221
BURKO-j14-exp2-ileon_323	Sa	98	BURKO j14 exp2 ileon	#01665E
FECES-j7-exp3-ileon_306	Sa	99	FECES j7 exp3 ileon	#BB3279
BURKO-j7-exp2-ileon_304	Sa	100	BURKO j7 exp2 ileon	#40998F
ATB-j14-exp3-ileon_315	Sa	101	ATB j14 exp3 ileon	#A50F15
Nacl-j7-exp3-ileon_294	Sa	102	Nacl j7 exp3 ileon	#006D2C
BURKO-j3-exp2-ileon_279	Sa	103	BURKO j3 exp2 ileon	#80CDC1
AKKERMANSIA-j3-exp3-ileon_285	Sa	104	AKKER j3 exp3 ileon	#B8E186
Nacl-j3-exp2-ileon_269	Sa	106	Nacl j3 exp2 ileon	#41AB5D
ATB-j7-exp3-ileon_295	Sa	107	ATB j7 exp3 ileon	#EF3B2C
ATB-j3-exp2-ileon_273	Sa	109	ATB j3 exp2 ileon	#FB6A4A
FECES-j14-exp3-ileon_319	Sa	110	FECES j14 exp3 ileon	#980043
MITSUAKI-j3-exp2-ileon_285	Sa	111	MITSUAKI j3 exp2 ileon	#FD8D3C
Nacl-j3-exp3-ileon_265	Sa	112	Nacl j3 exp3 ileon	#41AB5D
BURKO-j7-exp2-ileon_303	Sa	114	BURKO j7 exp2 ileon	#40998F
ATB-j7-exp2-ileon_297	Sa	115	ATB j7 exp2 ileon	#EF3B2C
ATB-j14-exp3-ileon_318	Sa	116	ATB j14 exp3 ileon	#A50F15
MITSUAKI-j14-exp2-ileon_328	Sa	117	MITSUAKI j14 exp2 ileon	#A63603
AKKERMANSIA-j7-exp3-ileon_311	Sa	118	AKKER j7 exp3 ileon	#7FBC41
BURKO-j14-exp2-ileon_322	Sa	119	BURKO j14 exp2 ileon	#01665E
FECES-j3-exp3-ileon_277	Sa	120	FECES j3 exp3 ileon	#DF65B0
ATB-j7-exp2-ileon_298	Sa	122	ATB j7 exp2 ileon	#EF3B2C
ATB-j14-exp2-ileon_316	Sa	124	ATB j14 exp2 ileon	#A50F15
ATB-j7-exp3-ileon_300	Sa	125	ATB j7 exp3 ileon	#EF3B2C
Nacl-j7-exp2-ileon_291	Sa	126	Nacl j7 exp2 ileon	#006D2C
Nacl-j7-exp3-ileon_293	Sa	127	Nacl j7 exp3 ileon	#006D2C
FECES-j14-exp3-ileon_320	Sa	129	FECES j14 exp3 ileon	#980043
ATB-j3-exp2-ileon_272	Sa	130	ATB j3 exp2 ileon	#FB6A4A
ATB-j3-exp3-ileon_276	Sa	131	ATB j3 exp3 ileon	#FB6A4A
BURKO-j14-exp2-ileon_321	Sa	132	BURKO j14 exp2 ileon	#01665E
MITSUAKI-j14-exp2-ileon_329	Sa	133	MITSUAKI j14 exp2 ileon	#A63603
AKKERMANSIA-j3-exp3-ileon_288	Sa	134	AKKER j3 exp3 ileon	#B8E186
FECES-j3-exp3-ileon_282	Sa	137	FECES j3 exp3 ileon	#DF65B0
MITSUAKI-j3-exp2-ileon_288	Sa	138	MITSUAKI j3 exp2 ileon	#FD8D3C
ATB-j14-exp3-ileon_313	Sa	139	ATB j14 exp3 ileon	#A50F15
ATB-j3-exp2-ileon_276	Sa	140	ATB j3 exp2 ileon	#FB6A4A
AKKERMANSIA-j7-exp3-ileon_312	Sa	141	AKKER j7 exp3 ileon	#7FBC41
BURKO-j3-exp2-ileon_282	Sa	142	BURKO j3 exp2 ileon	#80CDC1
FECES-j14-exp3-ileon_321	Sa	144	FECES j14 exp3 ileon	#980043
Nacl-j7-exp2-ileon_292	Sa	145	Nacl j7 exp2 ileon	#006D2C
MITSUAKI-j7-exp2-ileon_311	Sa	146	MITSUAKI j7 exp2 ileon	#D1611F
MITSUAKI-j14-exp2-ileon_327	Sa	147	MITSUAKI j14 exp2 ileon	#A63603
ATB-j7-exp2-ileon_296	Sa	149	ATB j7 exp2 ileon	#EF3B2C
BURKO-j7-exp2-ileon_302	Sa	150	BURKO j7 exp2 ileon	#40998F
HIRAE-j14-exp1-ileon_403	Sa	151	HIRAE j14 exp1 ileon	#54278F
Nacl-j7-exp2-ileon_290	Sa	152	Nacl j7 exp2 ileon	#006D2C
ATB-j7-exp1-ileon_375	Sa	153	ATB j7 exp1 ileon	#EF3B2C
ATB-j7-exp2-ileon_299	Sa	155	ATB j7 exp2 ileon	#EF3B2C
HIRAE-j14-exp1-ileon_407	Sa	156	HIRAE j14 exp1 ileon	#54278F
BURKO-j3-exp2-ileon_278	Sa	157	BURKO j3 exp2 ileon	#80CDC1
Nacl-j7-exp1-ileon_367	Sa	158	Nacl j7 exp1 ileon	#006D2C
Nacl-j3-exp2-ileon_268	Sa	159	Nacl j3 exp2 ileon	#41AB5D
FRAGILIS-j7-exp1-ileon_389	Sa	160	FRAGILIS j7 exp1 ileon	#B58943
MITSUAKI-j3-exp2-ileon_284	Sa	161	MITSUAKI j3 exp2 ileon	#FD8D3C
BURKO-j7-exp2-ileon_306	Sa	162	BURKO j7 exp2 ileon	#40998F
ATB-j14-exp1-ileon_400	Sa	163	ATB j14 exp1 ileon	#A50F15
ATB-j14-exp2-ileon_314	Sa	164	ATB j14 exp2 ileon	#A50F15
FRAGILIS-j7-exp1-ileon_385	Sa	165	FRAGILIS j7 exp1 ileon	#B58943
ATB-j3-exp1-ileon_343	Sa	166	ATB j3 exp1 ileon	#FB6A4A
MITSUAKI-j7-exp2-ileon_308	Sa	167	MITSUAKI j7 exp2 ileon	#D1611F
BARNECIELA-j14-exp1-ileon_415	Sa	168	BARNECIELA j14 exp1 ileon	#08519C
ATB-j14-exp2-ileon_315	Sa	169	ATB j14 exp2 ileon	#A50F15
ATB-j3-exp1-ileon_347	Sa	170	ATB j3 exp1 ileon	#FB6A4A
BURKO-j14-exp2-ileon_320	Sa	171	BURKO j14 exp2 ileon	#01665E
ATB-j7-exp1-ileon_377	Sa	174	ATB j7 exp1 ileon	#EF3B2C
MITSUAKI-j14-exp2-ileon_326	Sa	175	MITSUAKI j14 exp2 ileon	#A63603
ATB-j3-exp2-ileon_275	Sa	179	ATB j3 exp2 ileon	#FB6A4A
BARNECIELA-j3-exp1-ileon_361	Sa	180	BARNECIELA j3 exp1 ileon	#6BAED6
BURKO-j7-exp2-ileon_301	Sa	181	BURKO j7 exp2 ileon	#40998F
HIRAE-j3-exp1-ileon_353	Sa	182	HIRAE j3 exp1 ileon	#9E9AC8
ATB-j7-exp2-ileon_300	Sa	184	ATB j7 exp2 ileon	#EF3B2C
ATB-j14-exp1-ileon_398	Sa	185	ATB j14 exp1 ileon	#A50F15
Nacl-j7-exp2-ileon_289	Sa	186	Nacl j7 exp2 ileon	#006D2C
BARNECIELA-j3-exp1-ileon_363	Sa	187	BARNECIELA j3 exp1 ileon	#6BAED6
BURKO-j3-exp2-ileon_277	Sa	188	BURKO j3 exp2 ileon	#80CDC1
Nacl-j3-exp2-ileon_265	Sa	189	Nacl j3 exp2 ileon	#41AB5D
HIRAE-j7-exp1-ileon_381	Sa	190	HIRAE j7 exp1 ileon	#7960AB
ATB-j3-exp2-ileon_271	Sa	191	ATB j3 exp2 ileon	#FB6A4A
Nacl-j3-exp2-ileon_267	Sa	192	Nacl j3 exp2 ileon	#41AB5D
MITSUAKI-j3-exp2-ileon_283	Sa	193	MITSUAKI j3 exp2 ileon	#FD8D3C
HIRAE-j7-exp1-ileon_383	Sa	194	HIRAE j7 exp1 ileon	#7960AB
FRAGILIS-j3-exp1-ileon_357	Sa	195	FRAGILIS j3 exp1 ileon	#8C510A
ATB-j7-exp2-ileon_295	Sa	197	ATB j7 exp2 ileon	#EF3B2C
Nacl-j3-exp1-ileon_337	Sa	198	Nacl j3 exp1 ileon	#41AB5D
BURKO-j14-exp2-ileon_319	Sa	199	BURKO j14 exp2 ileon	#01665E
Nacl-j3-exp2-ileon_270	Sa	200	Nacl j3 exp2 ileon	#41AB5D
ATB-j14-exp2-ileon_318	Sa	202	ATB j14 exp2 ileon	#A50F15
FRAGILIS-j7-exp1-ileon_390	Sa	204	FRAGILIS j7 exp1 ileon	#B58943
MITSUAKI-j14-exp2-ileon_325	Sa	205	MITSUAKI j14 exp2 ileon	#A63603
BARNECIELA-j14-exp1-ileon_420	Sa	206	BARNECIELA j14 exp1 ileon	#08519C
FRAGILIS-j3-exp1-ileon_358	Sa	207	FRAGILIS j3 exp1 ileon	#8C510A
MITSUAKI-j3-exp2-ileon_287	Sa	208	MITSUAKI j3 exp2 ileon	#FD8D3C
BURKO-j14-exp2-ileon_324	Sa	209	BURKO j14 exp2 ileon	#01665E
Nacl-j3-exp1-ileon_339	Sa	210	Nacl j3 exp1 ileon	#41AB5D
MITSUAKI-j7-exp2-ileon_312	Sa	211	MITSUAKI j7 exp2 ileon	#D1611F
BURKO-j7-exp2-ileon_305	Sa	212	BURKO j7 exp2 ileon	#40998F
Nacl-j7-exp2-ileon_294	Sa	214	Nacl j7 exp2 ileon	#006D2C
ATB-j3-exp1-ileon_345	Sa	215	ATB j3 exp1 ileon	#FB6A4A
MITSUAKI-j7-exp2-ileon_307	Sa	217	MITSUAKI j7 exp2 ileon	#D1611F
Nacl-j3-exp1-ileon_341	Sa	218	Nacl j3 exp1 ileon	#41AB5D
ATB-j14-exp2-ileon_313	Sa	219	ATB j14 exp2 ileon	#A50F15
Nacl-j7-exp1-ileon_371	Sa	221	Nacl j7 exp1 ileon	#006D2C
BURKO-j3-exp2-ileon_281	Sa	223	BURKO j3 exp2 ileon	#80CDC1
BARNECIELA-j7-exp1-ileon_393	Sa	225	BARNECIELA j7 exp1 ileon	#397FB9
MITSUAKI-j14-exp2-ileon_330	Sa	226	MITSUAKI j14 exp2 ileon	#A63603
FRAGILIS-j7-exp1-ileon_387	Sa	228	FRAGILIS j7 exp1 ileon	#B58943
FRAGILIS-j3-exp1-ileon_359	Sa	233	FRAGILIS j3 exp1 ileon	#8C510A
HIRAE-j3-exp1-ileon_351	Sa	236	HIRAE j3 exp1 ileon	#9E9AC8
FRAGILIS-j14-exp1-ileon_412	Sa	237	FRAGILIS j14 exp1 ileon	#DFC27D
ATB-j7-exp1-ileon_373	Sa	238	ATB j7 exp1 ileon	#EF3B2C
Nacl-j7-exp1-ileon_369	Sa	240	Nacl j7 exp1 ileon	#006D2C
FRAGILIS-j3-exp1-ileon_355	Sa	241	FRAGILIS j3 exp1 ileon	#8C510A
ATB-j7-exp1-ileon_374	Sa	245	ATB j7 exp1 ileon	#EF3B2C
ATB-j14-exp1-ileon_401	Sa	246	ATB j14 exp1 ileon	#A50F15
BARNECIELA-j7-exp1-ileon_394	Sa	247	BARNECIELA j7 exp1 ileon	#397FB9
BARNECIELA-j3-exp1-ileon_364	Sa	249	BARNECIELA j3 exp1 ileon	#6BAED6
Nacl-j7-exp1-ileon_370	Sa	251	Nacl j7 exp1 ileon	#006D2C
Nacl-j3-exp1-ileon_340	Sa	253	Nacl j3 exp1 ileon	#41AB5D
HIRAE-j14-exp1-ileon_408	Sa	255	HIRAE j14 exp1 ileon	#54278F
HIRAE-j7-exp1-ileon_379	Sa	257	HIRAE j7 exp1 ileon	#7960AB
FRAGILIS-j14-exp1-ileon_409	Sa	258	FRAGILIS j14 exp1 ileon	#DFC27D
HIRAE-j7-exp1-ileon_382	Sa	259	HIRAE j7 exp1 ileon	#7960AB
HIRAE-j3-exp1-ileon_352	Sa	261	HIRAE j3 exp1 ileon	#9E9AC8
FRAGILIS-j14-exp1-ileon_411	Sa	263	FRAGILIS j14 exp1 ileon	#DFC27D
BARNECIELA-j3-exp1-ileon_365	Sa	264	BARNECIELA j3 exp1 ileon	#6BAED6
Nacl-j3-exp1-ileon_338	Sa	265	Nacl j3 exp1 ileon	#41AB5D
ATB-j14-exp1-ileon_399	Sa	266	ATB j14 exp1 ileon	#A50F15
HIRAE-j3-exp1-ileon_349	Sa	267	HIRAE j3 exp1 ileon	#9E9AC8
BARNECIELA-j14-exp1-ileon_419	Sa	271	BARNECIELA j14 exp1 ileon	#08519C
BARNECIELA-j7-exp1-ileon_395	Sa	272	BARNECIELA j7 exp1 ileon	#397FB9
BARNECIELA-j7-exp1-ileon_391	Sa	273	BARNECIELA j7 exp1 ileon	#397FB9
BARNECIELA-j14-exp1-ileon_416	Sa	274	BARNECIELA j14 exp1 ileon	#08519C
ATB-j7-exp1-ileon_376	Sa	275	ATB j7 exp1 ileon	#EF3B2C
HIRAE-j14-exp1-ileon_405	Sa	276	HIRAE j14 exp1 ileon	#54278F
FRAGILIS-j14-exp1-ileon_414	Sa	277	FRAGILIS j14 exp1 ileon	#DFC27D
ATB-j3-exp1-ileon_346	Sa	278	ATB j3 exp1 ileon	#FB6A4A
Nacl-j3-exp1-ileon_342	Sa	279	Nacl j3 exp1 ileon	#41AB5D
HIRAE-j14-exp1-ileon_404	Sa	280	HIRAE j14 exp1 ileon	#54278F
ATB-j3-exp1-ileon_344	Sa	282	ATB j3 exp1 ileon	#FB6A4A
HIRAE-j7-exp1-ileon_380	Sa	284	HIRAE j7 exp1 ileon	#7960AB
FRAGILIS-j14-exp1-ileon_413	Sa	285	FRAGILIS j14 exp1 ileon	#DFC27D
HIRAE-j3-exp1-ileon_350	Sa	286	HIRAE j3 exp1 ileon	#9E9AC8
Nacl-j7-exp1-ileon_372	Sa	287	Nacl j7 exp1 ileon	#006D2C
FRAGILIS-j7-exp1-ileon_386	Sa	288	FRAGILIS j7 exp1 ileon	#B58943
FRAGILIS-j3-exp1-ileon_360	Sa	289	FRAGILIS j3 exp1 ileon	#8C510A
ATB-j14-exp1-ileon_402	Sa	290	ATB j14 exp1 ileon	#A50F15
ATB-j14-exp1-ileon_397	Sa	291	ATB j14 exp1 ileon	#A50F15
BARNECIELA-j3-exp1-ileon_366	Sa	292	BARNECIELA j3 exp1 ileon	#6BAED6
HIRAE-j3-exp1-ileon_354	Sa	293	HIRAE j3 exp1 ileon	#9E9AC8
FRAGILIS-j3-exp1-ileon_356	Sa	294	FRAGILIS j3 exp1 ileon	#8C510A
BARNECIELA-j7-exp1-ileon_392	Sa	295	BARNECIELA j7 exp1 ileon	#397FB9
BARNECIELA-j3-exp1-ileon_362	Sa	297	BARNECIELA j3 exp1 ileon	#6BAED6
BARNECIELA-j14-exp1-ileon_417	Sa	299	BARNECIELA j14 exp1 ileon	#08519C
FRAGILIS-j7-exp1-ileon_388	Sa	300	FRAGILIS j7 exp1 ileon	#B58943
BARNECIELA-j7-exp1-ileon_396	Sa	301	BARNECIELA j7 exp1 ileon	#397FB9
HIRAE-j7-exp1-ileon_384	Sa	302	HIRAE j7 exp1 ileon	#7960AB
Nacl-j7-exp1-ileon_368	Sa	303	Nacl j7 exp1 ileon	#006D2C
FRAGILIS-j14-exp1-ileon_410	Sa	304	FRAGILIS j14 exp1 ileon	#DFC27D
HIRAE-j14-exp1-ileon_406	Sa	305	HIRAE j14 exp1 ileon	#54278F
ATB-j3-exp1-ileon_348	Sa	306	ATB j3 exp1 ileon	#FB6A4A
BARNECIELA-j14-exp1-ileon_418	Sa	307	BARNECIELA j14 exp1 ileon	#08519C
St_SCFA-exp3-ileon_pre	St	1	-	-
St_PA-exp2-ileon_pre.paileon2	St	2	-	-
St_BA1-exp3-ileon_pre	St	3	-	-
St_AA_exp3-ileon_pre	St	4	-	-
St_BA2-exp3-ileon_pre	St	6	-	-
St_PA-exp2-ileon_post	St	49	-	-
St_PA-exp2-ileon_pre.paileon1	St	53	-	-
St_SCFA-exp3-ileon_post	St	57	-	-
St_AA_exp3-ileon_post	St	59	-	-
St_SCFA-exp2-ileon_pre	St	61	-	-
St_AA-exp1-ileon_pre	St	62	-	-
St_BA2-exp3-ileon_post	St	64	-	-
St_BA1-exp3-ileon_post	St	67	-	-
St_BA1-exp2-ileon_pre	St	70	-	-
St_BA2-exp2-ileon_pre	St	72	-	-
St_SCFA-exp2-ileon_post	St	220	-	-
St_SCFA1-exp1-ileon_pre	St	222	-	-
St_BA2-exp2-ileon_post	St	235	-	-
St_BA1-exp2-ileon_post	St	239	-	-
St_BA1-exp1-ileon_pre	St	243	-	-
St_BA2-exp1-ileon_pre	St	244	-	-
St_PA-exp1-ileon_post	St	250	-	-
St_PA-exp3-ileon_pre	St	252	-	-
St_AA-exp1-ileon_post	St	268	-	-
St_AA_exp2-ileon_pre	St	270	-	-
St_PA-exp3-ileon_post	St	315	-	-
St_SCFA1-exp1-ileon_post	St	321	-	-
St_AA_exp2-ileon_post	St	322	-	-
St_BA2-exp1-ileon_post	St	325	-	-
St_BA1-exp1-ileon_post	St	326	-	-

## Sheet: FileInfos
Sid	File.sf	Date.sf	Name.sf	Batch.sf	InjOrder.sf	File.pa	Date.pa	Name.pa	Batch.pa	InjOrder.pa	File.ba	Date.ba	Name.ba	Batch.ba	InjOrder.ba	File.gc	Date.gc	Name.gc	Batch.gc	InjOrder.gc
BlM-exp3-ileon_pre	Bl_matrice-exp3-ileon_SF_3a.d	(02/26/17 00:00:00)	Bl_matrice-exp3-ileon_SF_3a	sfileon3	2	-	(NA NA)	-	-	-	-	(NA NA)	-	-	-	-	(NA NA)	-	-	-
BlM_exp3-ileon_pre	-	(NA NA)	-	-	-	Bl_matrice-exp3-ileon_PA_3a.d	(04/21/17 00:00:00)	Bl_matrice-exp3-ileon_PA_3a	paileon3	168	Bl_matrice-exp3-ileon_BA_4a.d	(01/18/17 00:00:00)	Bl_matrice-exp3-ileon_BA_4a	baileon3	3	Bl_matrice-exp3-ileon_GCMRM_4a.D	(02/11/17 00:00:00)	Bl_matrice-exp3-ileon_4a	gcileon3	2
BlM-exp3-ileon_post	Bl_matrice-exp3-ileon_SF_3b.d	(03/01/17 00:00:00)	Bl_matrice-exp3-ileon_SF_3b	sfileon3	77	-	(NA NA)	-	-	-	-	(NA NA)	-	-	-	-	(NA NA)	-	-	-
BlM-exp2-ileon_pre	Bl_matrice-exp2-ileon_SF_3a.d	(03/01/17 00:00:00)	Bl_matrice-exp2-ileon_SF_3a	sfileon2	80	-	(NA NA)	-	-	-	-	(NA NA)	-	-	-	-	(NA NA)	-	-	-
BlM_exp2-ileon_4a	-	(NA NA)	-	-	-	-	(NA NA)	-	-	-	Bl_matrice-exp2-ileon_BA_4a.d	(01/21/17 00:00:00)	Bl_matrice-exp2-ileon_BA_4a	baileon2	84	-	(NA NA)	-	-	-
BlM_exp2-ileon_pre	-	(NA NA)	-	-	-	Bl_matrice-exp2-ileon_PA_3a.d	(04/18/17 00:00:00)	Bl_matrice-exp2-ileon_PA_3a	paileon2	2	-	(NA NA)	-	-	-	Bl_matrice-exp2-ileon_GCMRM_4a.D	(02/20/17 00:00:00)	Bl_matrice-exp2-ileon_4a	gcileon2	176
BlM_exp1-ileon_pre	-	(NA NA)	-	-	-	Bl_matrice-exp1-ileon_PA_3a.d	(04/21/17 00:00:00)	Bl_matrice-exp1-ileon_PA_3a	paileon1	77	Bl_matrice-exp1-ileon_BA_4a.d	(01/24/17 00:00:00)	Bl_matrice-exp1-ileon_BA_4a	baileon1	164	Bl_matrice-exp1-ileon_GCMRM_4a.D	(02/14/17 00:00:00)	Bl_matrice-exp1-ileon_4a	gcileon1	80
BlM_exp3-ileon_post	-	(NA NA)	-	-	-	Bl_matrice-exp3-ileon_PA_3b.d	(04/24/17 00:00:00)	Bl_matrice-exp3-ileon_PA_3b	paileon3	241	Bl_matrice-exp3-ileon_BA_4b.d	(01/21/17 00:00:00)	Bl_matrice-exp3-ileon_BA_4b	baileon3	79	Bl_matrice-exp3-ileon_GCMRM_4b.D	(02/11/17 00:00:00)	Bl_matrice-exp3-ileon_4b	gcileon3	77
BlM-exp2-ileon_post	Bl_matrice-exp2-ileon_SF_3b.d	(03/04/17 00:00:00)	Bl_matrice-exp2-ileon_SF_3b	sfileon2	153	-	(NA NA)	-	-	-	-	(NA NA)	-	-	-	-	(NA NA)	-	-	-
BlM-exp1-ileon_5a	Bl_matrice-exp1-ileon_SF_5a.d	(03/07/17 00:00:00)	Bl_matrice-exp1-ileon_SF_5a	sfileon1	156	-	(NA NA)	-	-	-	-	(NA NA)	-	-	-	-	(NA NA)	-	-	-
BlM_exp2-ileon_4b	-	(NA NA)	-	-	-	-	(NA NA)	-	-	-	Bl_matrice-exp2-ileon_BA_4b.d	(01/21/17 00:00:00)	Bl_matrice-exp2-ileon_BA_4b	baileon2	159	-	(NA NA)	-	-	-
BlM_exp2-ileon_post	-	(NA NA)	-	-	-	Bl_matrice-exp2-ileon_PA_3b.d	(04/21/17 00:00:00)	Bl_matrice-exp2-ileon_PA_3b	paileon2	74	-	(NA NA)	-	-	-	Bl_matrice-exp2-ileon_GCMRM_4b.D	(02/23/17 00:00:00)	Bl_matrice-exp2-ileon_4b	gcileon2	250
BlM_exp1-ileon_post	-	(NA NA)	-	-	-	Bl_matrice-exp1-ileon_PA_3b.d	(04/21/17 00:00:00)	Bl_matrice-exp1-ileon_PA_3b	paileon1	165	-	(NA NA)	-	-	-	Bl_matrice-exp1-ileon_GCMRM_4b.D	(02/17/17 00:00:00)	Bl_matrice-exp1-ileon_4b	gcileon1	173
BlM-exp1-ileon_5b	Bl_matrice-exp1-ileon_SF_5b.d	(03/10/17 00:00:00)	Bl_matrice-exp1-ileon_SF_5b	sfileon1	250	-	(NA NA)	-	-	-	-	(NA NA)	-	-	-	-	(NA NA)	-	-	-
BMl_-exp1-ileon_post	-	(NA NA)	-	-	-	-	(NA NA)	-	-	-	Bl_matrice-exp1-ileon_BA_4b.d	(01/27/17 00:00:00)	Bl_matrice-exp1-ileon_BA_4b	baileon1	260	-	(NA NA)	-	-	-
QC-exp3-ileon_5a	QC_batch-exp3-ileon_SF_5a.d	(03/01/17 00:00:00)	QC_batch-exp3-ileon_SF_5a	sfileon3	3	-	(NA NA)	-	-	-	-	(NA NA)	-	-	-	-	(NA NA)	-	-	-
QC_exp123-ileon_pre.baileon3	-	(NA NA)	-	-	-	-	(NA NA)	-	-	-	QC_batch-exp123-ileon_BA_6a.d	(01/21/17 00:00:00)	QC_batch-exp123-ileon_BA_6a	baileon3	4	-	(NA NA)	-	-	-
QC-exp3-ileon_5b	QC_batch-exp3-ileon_SF_5b.d	(03/01/17 00:00:00)	QC_batch-exp3-ileon_SF_5b	sfileon3	13	-	(NA NA)	-	-	-	-	(NA NA)	-	-	-	-	(NA NA)	-	-	-
QC-exp3-ileon_5c	QC_batch-exp3-ileon_SF_5c.d	(03/01/17 00:00:00)	QC_batch-exp3-ileon_SF_5c	sfileon3	24	-	(NA NA)	-	-	-	-	(NA NA)	-	-	-	-	(NA NA)	-	-	-
QC-exp3-ileon_5d	QC_batch-exp3-ileon_SF_5d.d	(03/01/17 00:00:00)	QC_batch-exp3-ileon_SF_5d	sfileon3	36	-	(NA NA)	-	-	-	-	(NA NA)	-	-	-	-	(NA NA)	-	-	-
QC_exp3-ileon_6a	-	(NA NA)	-	-	-	-	(NA NA)	-	-	-	-	(NA NA)	-	-	-	QC_batch-exp3-ileon_GCMRM_6a.D	(02/11/17 00:00:00)	QC_batch-exp3-ileon_6a	gcileon3	38
QC-exp3-ileon_5e	QC_batch-exp3-ileon_SF_5e.d	(03/01/17 00:00:00)	QC_batch-exp3-ileon_SF_5e	sfileon3	48	-	(NA NA)	-	-	-	-	(NA NA)	-	-	-	-	(NA NA)	-	-	-
QC_exp3-ileon_6b	-	(NA NA)	-	-	-	-	(NA NA)	-	-	-	-	(NA NA)	-	-	-	QC_batch-exp3-ileon_GCMRM_6b.D	(02/11/17 00:00:00)	QC_batch-exp3-ileon_6b	gcileon3	50
QC_exp3-ileon_5a	-	(NA NA)	-	-	-	QC_batch-exp3-ileon_PA_5a.d	(04/21/17 00:00:00)	QC_batch-exp3-ileon_PA_5a	paileon3	169	QC_batch-exp3-ileon_BA_5a.d	(01/21/17 00:00:00)	QC_batch-exp3-ileon_BA_5a	baileon3	5	QC_batch-exp3-ileon_GCMRM_5a.D	(02/11/17 00:00:00)	QC_batch-exp3-ileon_5a	gcileon3	3
QC-exp3-ileon_5f	QC_batch-exp3-ileon_SF_5f.d	(03/01/17 00:00:00)	QC_batch-exp3-ileon_SF_5f	sfileon3	60	-	(NA NA)	-	-	-	-	(NA NA)	-	-	-	-	(NA NA)	-	-	-
QC_exp3-ileon_6c	-	(NA NA)	-	-	-	-	(NA NA)	-	-	-	-	(NA NA)	-	-	-	QC_batch-exp3-ileon_GCMRM_6c.D	(02/11/17 00:00:00)	QC_batch-exp3-ileon_6c	gcileon3	62
QC_exp3-ileon_5b	-	(NA NA)	-	-	-	QC_batch-exp3-ileon_PA_5b.d	(04/21/17 00:00:00)	QC_batch-exp3-ileon_PA_5b	paileon3	179	QC_batch-exp3-ileon_BA_5b.d	(01/21/17 00:00:00)	QC_batch-exp3-ileon_BA_5b	baileon3	16	QC_batch-exp3-ileon_GCMRM_5b.D	(02/11/17 00:00:00)	QC_batch-exp3-ileon_5b	gcileon3	14
QC-exp3-ileon_5g	QC_batch-exp3-ileon_SF_5g.d	(03/01/17 00:00:00)	QC_batch-exp3-ileon_SF_5g	sfileon3	73	-	(NA NA)	-	-	-	-	(NA NA)	-	-	-	-	(NA NA)	-	-	-
QC_exp3-ileon_6d	-	(NA NA)	-	-	-	-	(NA NA)	-	-	-	-	(NA NA)	-	-	-	QC_batch-exp3-ileon_GCMRM_6d.D	(02/11/17 00:00:00)	QC_batch-exp3-ileon_6d	gcileon3	75
QC-exp3-ileon_5h	QC_batch-exp3-ileon_SF_5h.d	(03/01/17 00:00:00)	QC_batch-exp3-ileon_SF_5h	sfileon3	76	-	(NA NA)	-	-	-	-	(NA NA)	-	-	-	-	(NA NA)	-	-	-
QC_exp123-ileon_post.baileon3	-	(NA NA)	-	-	-	-	(NA NA)	-	-	-	QC_batch-exp123-ileon_BA_6b.d	(01/21/17 00:00:00)	QC_batch-exp123-ileon_BA_6b	baileon3	78	-	(NA NA)	-	-	-
QC-exp2-ileon_5a	QC_batch-exp2-ileon_SF_5a.d	(03/01/17 00:00:00)	QC_batch-exp2-ileon_SF_5a	sfileon2	81	-	(NA NA)	-	-	-	-	(NA NA)	-	-	-	-	(NA NA)	-	-	-
QC_exp3-ileon_5c	-	(NA NA)	-	-	-	QC_batch-exp3-ileon_PA_5c.d	(04/21/17 00:00:00)	QC_batch-exp3-ileon_PA_5c	paileon3	191	QC_batch-exp3-ileon_BA_5c.d	(01/21/17 00:00:00)	QC_batch-exp3-ileon_BA_5c	baileon3	28	QC_batch-exp3-ileon_GCMRM_5c.D	(02/11/17 00:00:00)	QC_batch-exp3-ileon_5c	gcileon3	26
QC_exp123-ileon_6a	-	(NA NA)	-	-	-	-	(NA NA)	-	-	-	QC_batch-exp123-ileon_BA_6a.d	(01/21/17 00:00:00)	QC_batch-exp123-ileon_BA_6a	baileon2	85	-	(NA NA)	-	-	-
QC_exp2-ileon_5e	-	(NA NA)	-	-	-	QC_batch-exp2-ileon_PA_5e.d	(04/18/17 00:00:00)	QC_batch-exp2-ileon_PA_5e	paileon2	44	QC_batch-exp2-ileon_BA_5e.d	(01/21/17 00:00:00)	QC_batch-exp2-ileon_BA_5e	baileon2	129	-	(NA NA)	-	-	-
QC_exp2-ileon_5a	-	(NA NA)	-	-	-	QC_batch-exp2-ileon_PA_5a.d	(04/18/17 00:00:00)	QC_batch-exp2-ileon_PA_5a	paileon2	3	QC_batch-exp2-ileon_BA_5a.d	(01/21/17 00:00:00)	QC_batch-exp2-ileon_BA_5a	baileon2	86	QC_batch-exp2-ileon_GCMRM_5a.D	(02/23/17 00:00:00)	QC_batch-exp2-ileon_5a	gcileon2	177
QC-exp2-ileon_5b	QC_batch-exp2-ileon_SF_5b.d	(03/01/17 00:00:00)	QC_batch-exp2-ileon_SF_5b	sfileon2	92	-	(NA NA)	-	-	-	-	(NA NA)	-	-	-	-	(NA NA)	-	-	-
QC_exp2-ileon_5f	-	(NA NA)	-	-	-	QC_batch-exp2-ileon_PA_5f.d	(04/18/17 00:00:00)	QC_batch-exp2-ileon_PA_5f	paileon2	57	QC_batch-exp2-ileon_BA_5f.d	(01/21/17 00:00:00)	QC_batch-exp2-ileon_BA_5f	baileon2	142	-	(NA NA)	-	-	-
QC_exp2-ileon_5b	-	(NA NA)	-	-	-	QC_batch-exp2-ileon_PA_5b.d	(04/18/17 00:00:00)	QC_batch-exp2-ileon_PA_5b	paileon2	14	QC_batch-exp2-ileon_BA_5b.d	(01/21/17 00:00:00)	QC_batch-exp2-ileon_BA_5b	baileon2	98	QC_batch-exp2-ileon_GCMRM_5b.D	(02/23/17 00:00:00)	QC_batch-exp2-ileon_5b	gcileon2	189
QC-exp2-ileon_5c	QC_batch-exp2-ileon_SF_5c.d	(03/01/17 00:00:00)	QC_batch-exp2-ileon_SF_5c	sfileon2	103	-	(NA NA)	-	-	-	-	(NA NA)	-	-	-	-	(NA NA)	-	-	-
QC_exp3-ileon_5d	-	(NA NA)	-	-	-	QC_batch-exp3-ileon_PA_5d.d	(04/21/17 00:00:00)	QC_batch-exp3-ileon_PA_5d	paileon3	203	QC_batch-exp3-ileon_BA_5d.d	(01/21/17 00:00:00)	QC_batch-exp3-ileon_BA_5d	baileon3	40	QC_batch-exp3-ileon_GCMRM_5d.D	(02/11/17 00:00:00)	QC_batch-exp3-ileon_5d	gcileon3	76
QC_exp1-ileon_5a	-	(NA NA)	-	-	-	QC_batch-exp1-ileon_PA_5a.d	(04/21/17 00:00:00)	QC_batch-exp1-ileon_PA_5a	paileon1	78	QC_batch-exp1-ileon_BA_5a.d	(01/24/17 00:00:00)	QC_batch-exp1-ileon_BA_5a	baileon1	166	QC_batch-exp1-ileon_GCMRM_5a.D	(02/17/17 00:00:00)	QC_batch-exp1-ileon_5a	gcileon1	81
QC_exp2-ileon_5c	-	(NA NA)	-	-	-	QC_batch-exp2-ileon_PA_5c.d	(04/18/17 00:00:00)	QC_batch-exp2-ileon_PA_5c	paileon2	25	QC_batch-exp2-ileon_BA_5c.d	(01/21/17 00:00:00)	QC_batch-exp2-ileon_BA_5c	baileon2	109	QC_batch-exp2-ileon_GCMRM_5c.D	(02/23/17 00:00:00)	QC_batch-exp2-ileon_5c	gcileon2	200
QC-exp2-ileon_5d	QC_batch-exp2-ileon_SF_5d.d	(03/01/17 00:00:00)	QC_batch-exp2-ileon_SF_5d	sfileon2	112	-	(NA NA)	-	-	-	-	(NA NA)	-	-	-	-	(NA NA)	-	-	-
QC_exp2-ileon_5g	-	(NA NA)	-	-	-	QC_batch-exp2-ileon_PA_5g.d	(04/18/17 00:00:00)	QC_batch-exp2-ileon_PA_5g	paileon2	73	QC_batch-exp2-ileon_BA_5g.d	(01/21/17 00:00:00)	QC_batch-exp2-ileon_BA_5g	baileon2	157	-	(NA NA)	-	-	-
QC_exp1-ileon_5b	-	(NA NA)	-	-	-	QC_batch-exp1-ileon_PA_5b.d	(04/21/17 00:00:00)	QC_batch-exp1-ileon_PA_5b	paileon1	91	QC_batch-exp1-ileon_BA_5b.d	(01/24/17 00:00:00)	QC_batch-exp1-ileon_BA_5b	baileon1	174	QC_batch-exp1-ileon_GCMRM_5b.D	(02/17/17 00:00:00)	QC_batch-exp1-ileon_5b	gcileon1	94
QC-exp2-ileon_5e	QC_batch-exp2-ileon_SF_5e.d	(03/01/17 00:00:00)	QC_batch-exp2-ileon_SF_5e	sfileon2	123	-	(NA NA)	-	-	-	-	(NA NA)	-	-	-	-	(NA NA)	-	-	-
QC_exp1-ileon_5c	-	(NA NA)	-	-	-	QC_batch-exp1-ileon_PA_5c.d	(04/21/17 00:00:00)	QC_batch-exp1-ileon_PA_5c	paileon1	103	QC_batch-exp1-ileon_BA_5c.d	(01/24/17 00:00:00)	QC_batch-exp1-ileon_BA_5c	baileon1	187	QC_batch-exp1-ileon_GCMRM_5c.D	(02/17/17 00:00:00)	QC_batch-exp1-ileon_5c	gcileon1	107
QC_exp2-ileon_5d	-	(NA NA)	-	-	-	QC_batch-exp2-ileon_PA_5d.d	(04/18/17 00:00:00)	QC_batch-exp2-ileon_PA_5d	paileon2	33	QC_batch-exp2-ileon_BA_5d.d	(01/21/17 00:00:00)	QC_batch-exp2-ileon_BA_5d	baileon2	118	QC_batch-exp2-ileon_GCMRM_5d.D	(02/23/17 00:00:00)	QC_batch-exp2-ileon_5d	gcileon2	248
QC_exp1-ileon_6a	-	(NA NA)	-	-	-	-	(NA NA)	-	-	-	-	(NA NA)	-	-	-	QC_batch-exp1-ileon_GCMRM_6a.D	(02/17/17 00:00:00)	QC_batch-exp1-ileon_6a	gcileon1	133
QC_exp3-ileon_5e	-	(NA NA)	-	-	-	QC_batch-exp3-ileon_PA_5e.d	(04/21/17 00:00:00)	QC_batch-exp3-ileon_PA_5e	paileon3	215	QC_batch-exp3-ileon_BA_5e.d	(01/21/17 00:00:00)	QC_batch-exp3-ileon_BA_5e	baileon3	52	-	(NA NA)	-	-	-
QC-exp2-ileon_5f	QC_batch-exp2-ileon_SF_5f.d	(03/01/17 00:00:00)	QC_batch-exp2-ileon_SF_5f	sfileon2	136	-	(NA NA)	-	-	-	-	(NA NA)	-	-	-	-	(NA NA)	-	-	-
QC_exp1-ileon_5d	-	(NA NA)	-	-	-	QC_batch-exp1-ileon_PA_5d.d	(04/21/17 00:00:00)	QC_batch-exp1-ileon_PA_5d	paileon1	114	QC_batch-exp1-ileon_BA_5d.d	(01/24/17 00:00:00)	QC_batch-exp1-ileon_BA_5d	baileon1	194	QC_batch-exp1-ileon_GCMRM_5d.D	(02/17/17 00:00:00)	QC_batch-exp1-ileon_5d	gcileon1	120
QC_exp3-ileon_5f	-	(NA NA)	-	-	-	QC_batch-exp3-ileon_PA_5f.d	(04/21/17 00:00:00)	QC_batch-exp3-ileon_PA_5f	paileon3	227	QC_batch-exp3-ileon_BA_5f.d	(01/21/17 00:00:00)	QC_batch-exp3-ileon_BA_5f	baileon3	64	-	(NA NA)	-	-	-
QC_exp1-ileon_6b	-	(NA NA)	-	-	-	-	(NA NA)	-	-	-	-	(NA NA)	-	-	-	QC_batch-exp1-ileon_GCMRM_6b.D	(02/17/17 00:00:00)	QC_batch-exp1-ileon_6b	gcileon1	146
QC-exp2-ileon_5g	QC_batch-exp2-ileon_SF_5g.d	(03/04/17 00:00:00)	QC_batch-exp2-ileon_SF_5g	sfileon2	152	-	(NA NA)	-	-	-	-	(NA NA)	-	-	-	-	(NA NA)	-	-	-
QC_batch-exp123-exp1-ileon_SF_8a	QC_batch-exp123-exp1-ileon_SF_8a.d	(03/07/17 00:00:00)	QC_batch-exp123-exp1-ileon_SF_8a	sfileon1	157	-	(NA NA)	-	-	-	-	(NA NA)	-	-	-	-	(NA NA)	-	-	-
QC_batch-exp1-ileon_SF_7a	QC_batch-exp1-ileon_SF_7a.d	(03/07/17 00:00:00)	QC_batch-exp1-ileon_SF_7a	sfileon1	158	-	(NA NA)	-	-	-	-	(NA NA)	-	-	-	-	(NA NA)	-	-	-
QC_exp123-ileon_6b	-	(NA NA)	-	-	-	-	(NA NA)	-	-	-	QC_batch-exp123-ileon_BA_6b.d	(01/21/17 00:00:00)	QC_batch-exp123-ileon_BA_6b	baileon2	158	-	(NA NA)	-	-	-
QC_exp1-ileon_6c	-	(NA NA)	-	-	-	-	(NA NA)	-	-	-	-	(NA NA)	-	-	-	QC_batch-exp1-ileon_GCMRM_6c.D	(02/17/17 00:00:00)	QC_batch-exp1-ileon_6c	gcileon1	158
QC_exp3-ileon_5g	-	(NA NA)	-	-	-	QC_batch-exp3-ileon_PA_5g.d	(04/21/17 00:00:00)	QC_batch-exp3-ileon_PA_5g	paileon3	240	QC_batch-exp3-ileon_BA_5g.d	(01/21/17 00:00:00)	QC_batch-exp3-ileon_BA_5g	baileon3	77	-	(NA NA)	-	-	-
QC_exp123-ileon_pre.baileon1	-	(NA NA)	-	-	-	-	(NA NA)	-	-	-	QC_batch-exp123-ileon_BA_6a.d	(01/24/17 00:00:00)	QC_batch-exp123-ileon_BA_6a	baileon1	165	-	(NA NA)	-	-	-
QC_exp1-ileon_5e	-	(NA NA)	-	-	-	QC_batch-exp1-ileon_PA_5e.d	(04/21/17 00:00:00)	QC_batch-exp1-ileon_PA_5e	paileon1	126	QC_batch-exp1-ileon_BA_5e.d	(01/24/17 00:00:00)	QC_batch-exp1-ileon_BA_5e	baileon1	204	QC_batch-exp1-ileon_GCMRM_5e.D	(02/17/17 00:00:00)	QC_batch-exp1-ileon_5e	gcileon1	172
QC_batch-exp1-ileon_SF_7b	QC_batch-exp1-ileon_SF_7b.d	(03/07/17 00:00:00)	QC_batch-exp1-ileon_SF_7b	sfileon1	171	-	(NA NA)	-	-	-	-	(NA NA)	-	-	-	-	(NA NA)	-	-	-
QC_exp1-ileon_6d	-	(NA NA)	-	-	-	-	(NA NA)	-	-	-	-	(NA NA)	-	-	-	QC_batch-exp1-ileon_GCMRM_6d.D	(02/17/17 00:00:00)	QC_batch-exp1-ileon_6d	gcileon1	171
QC_exp1-ileon_5f	-	(NA NA)	-	-	-	QC_batch-exp1-ileon_PA_5f.d	(04/21/17 00:00:00)	QC_batch-exp1-ileon_PA_5f	paileon1	139	QC_batch-exp1-ileon_BA_5f.d	(01/24/17 00:00:00)	QC_batch-exp1-ileon_BA_5f	baileon1	210	-	(NA NA)	-	-	-
QC_batch-exp1-ileon_SF_7c	QC_batch-exp1-ileon_SF_7c.d	(03/07/17 00:00:00)	QC_batch-exp1-ileon_SF_7c	sfileon1	184	-	(NA NA)	-	-	-	-	(NA NA)	-	-	-	-	(NA NA)	-	-	-
QC_exp1-ileon_5g	-	(NA NA)	-	-	-	QC_batch-exp1-ileon_PA_5g.d	(04/21/17 00:00:00)	QC_batch-exp1-ileon_PA_5g	paileon1	151	QC_batch-exp1-ileon_BA_5g.d	(01/24/17 00:00:00)	QC_batch-exp1-ileon_BA_5g	baileon1	219	-	(NA NA)	-	-	-
QC_exp1-ileon_5h	-	(NA NA)	-	-	-	QC_batch-exp1-ileon_PA_5h.d	(04/21/17 00:00:00)	QC_batch-exp1-ileon_PA_5h	paileon1	164	QC_batch-exp1-ileon_BA_5h.d	(01/24/17 00:00:00)	QC_batch-exp1-ileon_BA_5h	baileon1	227	-	(NA NA)	-	-	-
QC_batch-exp1-ileon_SF_7d	QC_batch-exp1-ileon_SF_7d.d	(03/07/17 00:00:00)	QC_batch-exp1-ileon_SF_7d	sfileon1	197	-	(NA NA)	-	-	-	-	(NA NA)	-	-	-	-	(NA NA)	-	-	-
QC_exp2-ileon_6a	-	(NA NA)	-	-	-	-	(NA NA)	-	-	-	-	(NA NA)	-	-	-	QC_batch-exp2-ileon_GCMRM_6a.D	(02/23/17 00:00:00)	QC_batch-exp2-ileon_6a	gcileon2	209
QC_batch-exp1-ileon_SF_7e	QC_batch-exp1-ileon_SF_7e.d	(03/07/17 00:00:00)	QC_batch-exp1-ileon_SF_7e	sfileon1	210	-	(NA NA)	-	-	-	-	(NA NA)	-	-	-	-	(NA NA)	-	-	-
QC_exp2-ileon_6b	-	(NA NA)	-	-	-	-	(NA NA)	-	-	-	-	(NA NA)	-	-	-	QC_batch-exp2-ileon_GCMRM_6b.D	(02/23/17 00:00:00)	QC_batch-exp2-ileon_6b	gcileon2	220
QC_batch-exp1-ileon_SF_7f	QC_batch-exp1-ileon_SF_7f.d	(03/10/17 00:00:00)	QC_batch-exp1-ileon_SF_7f	sfileon1	223	-	(NA NA)	-	-	-	-	(NA NA)	-	-	-	-	(NA NA)	-	-	-
QC_exp123-ileon_post.baileon1	-	(NA NA)	-	-	-	-	(NA NA)	-	-	-	QC_batch-exp123-ileon_BA_6b.d	(01/24/17 00:00:00)	QC_batch-exp123-ileon_BA_6b	baileon1	228	-	(NA NA)	-	-	-
QC_exp2-ileon_6c	-	(NA NA)	-	-	-	-	(NA NA)	-	-	-	-	(NA NA)	-	-	-	QC_batch-exp2-ileon_GCMRM_6c.D	(02/23/17 00:00:00)	QC_batch-exp2-ileon_6c	gcileon2	233
QC_batch-exp1-ileon_SF_7g	QC_batch-exp1-ileon_SF_7g.d	(03/10/17 00:00:00)	QC_batch-exp1-ileon_SF_7g	sfileon1	235	-	(NA NA)	-	-	-	-	(NA NA)	-	-	-	-	(NA NA)	-	-	-
QC_exp1-ileon_5i	-	(NA NA)	-	-	-	-	(NA NA)	-	-	-	QC_batch-exp1-ileon_BA_5i.d	(01/27/17 00:00:00)	QC_batch-exp1-ileon_BA_5i	baileon1	244	-	(NA NA)	-	-	-
QC_batch-exp1-ileon_SF_7h	QC_batch-exp1-ileon_SF_7h.d	(03/10/17 00:00:00)	QC_batch-exp1-ileon_SF_7h	sfileon1	248	-	(NA NA)	-	-	-	-	(NA NA)	-	-	-	-	(NA NA)	-	-	-
QC_batch-exp123-exp1-ileon_SF_8b	QC_batch-exp123-exp1-ileon_SF_8b.d	(03/10/17 00:00:00)	QC_batch-exp123-exp1-ileon_SF_8b	sfileon1	249	-	(NA NA)	-	-	-	-	(NA NA)	-	-	-	-	(NA NA)	-	-	-
QC_exp2-ileon_6d	-	(NA NA)	-	-	-	-	(NA NA)	-	-	-	-	(NA NA)	-	-	-	QC_batch-exp2-ileon_GCMRM_6d.D	(02/23/17 00:00:00)	QC_batch-exp2-ileon_6d	gcileon2	249
QC_exp1-ileon_5jb	-	(NA NA)	-	-	-	-	(NA NA)	-	-	-	QC_batch-exp1-ileon_BA_5j.d	(01/27/17 00:00:00)	QC_batch-exp1-ileon_BA_5j	baileon1	259	-	(NA NA)	-	-	-
Nacl-j3-exp3-ileon_267	Sa_Nacl-M3-j3-exp3-ileon_SF_267.d	(03/01/17 00:00:00)	Sa_Nacl-M3-j3-exp3-ileon_SF_267	sfileon3	4	-	(NA NA)	-	-	-	Sa_Nacl-M3-j3-exp3-ileon_BA_267.d	(01/21/17 00:00:00)	Sa_Nacl-M3-j3-exp3-ileon_BA_267	baileon3	6	Sa_Nacl-M3-j3-exp3-ileon_GCMRM_267.D	(02/11/17 00:00:00)	Sa_Nacl-M3-j3-exp3-ileon_267	gcileon3	4
FECES-j3-exp3-ileon_280	Sa_FECES-M4-j3-exp3-ileon_SF_280.d	(03/01/17 00:00:00)	Sa_FECES-M4-j3-exp3-ileon_SF_280	sfileon3	5	Sa_FECES-M4-j3-exp3-ileon_PA_280.d	(04/21/17 00:00:00)	Sa_FECES-M4-j3-exp3-ileon_PA_280	paileon3	170	Sa_FECES-M4-j3-exp3-ileon_BA_280.d	(01/21/17 00:00:00)	Sa_FECES-M4-j3-exp3-ileon_BA_280	baileon3	7	Sa_FECES-M4-j3-exp3-ileon_GCMRM_280.D	(02/11/17 00:00:00)	Sa_FECES-M4-j3-exp3-ileon_280	gcileon3	5
ATB-j7-exp3-ileon_297	Sa_ATB-M3-j7-exp3-ileon_SF_297.d	(03/01/17 00:00:00)	Sa_ATB-M3-j7-exp3-ileon_SF_297	sfileon3	6	Sa_ATB-M3-j7-exp3-ileon_PA_297.d	(04/21/17 00:00:00)	Sa_ATB-M3-j7-exp3-ileon_PA_297	paileon3	171	Sa_ATB-M3-j7-exp3-ileon_BA_297.d	(01/21/17 00:00:00)	Sa_ATB-M3-j7-exp3-ileon_BA_297	baileon3	8	Sa_ATB-M3-j7-exp3-ileon_GCMRM_297.D	(02/11/17 00:00:00)	Sa_ATB-M3-j7-exp3-ileon_297	gcileon3	6
AKKERMANSIA-j14-exp3-ileon_327	Sa_AKKERMANSIA-M3-j14-exp3-ileon_SF_327.d	(03/01/17 00:00:00)	Sa_AKKERMANSIA-M3-j14-exp3-ileon_SF_327	sfileon3	7	Sa_AKKERMANSIA-M3-j14-exp3-ileon_PA_327.d	(04/21/17 00:00:00)	Sa_AKKERMANSIA-M3-j14-exp3-ileon_PA_327	paileon3	172	Sa_AKKERMANSIA-M3-j14-exp3-ileon_BA_327.d	(01/21/17 00:00:00)	Sa_AKKERMANSIA-M3-j14-exp3-ileon_BA_327	baileon3	9	Sa_AKKERMANSIA-M3-j14-exp3-ileon_GCMRM_327.D	(02/11/17 00:00:00)	Sa_AKKERMANSIA-M3-j14-exp3-ileon_327	gcileon3	7
Nacl-j7-exp3-ileon_291	Sa_Nacl-M3-j7-exp3-ileon_SF_291.d	(03/01/17 00:00:00)	Sa_Nacl-M3-j7-exp3-ileon_SF_291	sfileon3	8	Sa_Nacl-M3-j7-exp3-ileon_PA_291.d	(04/21/17 00:00:00)	Sa_Nacl-M3-j7-exp3-ileon_PA_291	paileon3	173	Sa_Nacl-M3-j7-exp3-ileon_BA_291.d	(01/21/17 00:00:00)	Sa_Nacl-M3-j7-exp3-ileon_BA_291	baileon3	10	Sa_Nacl-M3-j7-exp3-ileon_GCMRM_291.D	(02/11/17 00:00:00)	Sa_Nacl-M3-j7-exp3-ileon_291	gcileon3	8
ATB-j3-exp3-ileon_273	Sa_ATB-M3-j3-exp3-ileon_SF_273.d	(03/01/17 00:00:00)	Sa_ATB-M3-j3-exp3-ileon_SF_273	sfileon3	9	Sa_ATB-M3-j3-exp3-ileon_PA_273.d	(04/21/17 00:00:00)	Sa_ATB-M3-j3-exp3-ileon_PA_273	paileon3	174	Sa_ATB-M3-j3-exp3-ileon_BA_273.d	(01/21/17 00:00:00)	Sa_ATB-M3-j3-exp3-ileon_BA_273	baileon3	11	Sa_ATB-M3-j3-exp3-ileon_GCMRM_273.D	(02/11/17 00:00:00)	Sa_ATB-M3-j3-exp3-ileon_273	gcileon3	9
FECES-j7-exp3-ileon_304	Sa_FECES-M4-j7-exp3-ileon_SF_304.d	(03/01/17 00:00:00)	Sa_FECES-M4-j7-exp3-ileon_SF_304	sfileon3	10	Sa_FECES-M4-j7-exp3-ileon_PA_304.d	(04/21/17 00:00:00)	Sa_FECES-M4-j7-exp3-ileon_PA_304	paileon3	175	Sa_FECES-M4-j7-exp3-ileon_BA_304.d	(01/21/17 00:00:00)	Sa_FECES-M4-j7-exp3-ileon_BA_304	baileon3	12	Sa_FECES-M4-j7-exp3-ileon_GCMRM_304.D	(02/11/17 00:00:00)	Sa_FECES-M4-j7-exp3-ileon_304	gcileon3	10
ATB-j14-exp3-ileon_314	Sa_ATB-M2-j14-exp3-ileon_SF_314.d	(03/01/17 00:00:00)	Sa_ATB-M2-j14-exp3-ileon_SF_314	sfileon3	11	Sa_ATB-M2-j14-exp3-ileon_PA_314.d	(04/21/17 00:00:00)	Sa_ATB-M2-j14-exp3-ileon_PA_314	paileon3	177	Sa_ATB-M2-j14-exp3-ileon_BA_314.d	(01/21/17 00:00:00)	Sa_ATB-M2-j14-exp3-ileon_BA_314	baileon3	14	Sa_ATB-M2-j14-exp3-ileon_GCMRM_314.D	(02/11/17 00:00:00)	Sa_ATB-M2-j14-exp3-ileon_314	gcileon3	12
FECES-j14-exp3-ileon_323	Sa_FECES-M5-j14-exp3-ileon_SF_323.d	(03/01/17 00:00:00)	Sa_FECES-M5-j14-exp3-ileon_SF_323	sfileon3	12	Sa_FECES-M5-j14-exp3-ileon_PA_323.d	(04/21/17 00:00:00)	Sa_FECES-M5-j14-exp3-ileon_PA_323	paileon3	178	Sa_FECES-M5-j14-exp3-ileon_BA_323.d	(01/21/17 00:00:00)	Sa_FECES-M5-j14-exp3-ileon_BA_323	baileon3	15	Sa_FECES-M5-j14-exp3-ileon_GCMRM_323.D	(02/11/17 00:00:00)	Sa_FECES-M5-j14-exp3-ileon_323	gcileon3	13
Nacl-j3-exp3-ileon_269	Sa_Nacl-M5-j3-exp3-ileon_SF_269.d	(03/01/17 00:00:00)	Sa_Nacl-M5-j3-exp3-ileon_SF_269	sfileon3	14	Sa_Nacl-M5-j3-exp3-ileon_PA_269.d	(04/21/17 00:00:00)	Sa_Nacl-M5-j3-exp3-ileon_PA_269	paileon3	180	Sa_Nacl-M5-j3-exp3-ileon_BA_269.d	(01/21/17 00:00:00)	Sa_Nacl-M5-j3-exp3-ileon_BA_269	baileon3	17	Sa_Nacl-M5-j3-exp3-ileon_GCMRM_269.D	(02/11/17 00:00:00)	Sa_Nacl-M5-j3-exp3-ileon_269	gcileon3	15
FECES-j7-exp3-ileon_301	Sa_FECES-M1-j7-exp3-ileon_SF_301.d	(03/01/17 00:00:00)	Sa_FECES-M1-j7-exp3-ileon_SF_301	sfileon3	15	Sa_FECES-M1-j7-exp3-ileon_PA_301.d	(04/21/17 00:00:00)	Sa_FECES-M1-j7-exp3-ileon_PA_301	paileon3	182	Sa_FECES-M1-j7-exp3-ileon_BA_301.d	(01/21/17 00:00:00)	Sa_FECES-M1-j7-exp3-ileon_BA_301	baileon3	19	Sa_FECES-M1-j7-exp3-ileon_GCMRM_301.D	(02/11/17 00:00:00)	Sa_FECES-M1-j7-exp3-ileon_301	gcileon3	17
ATB-j3-exp3-ileon_272	Sa_ATB-M2-j3-exp3-ileon_SF_272.d	(03/01/17 00:00:00)	Sa_ATB-M2-j3-exp3-ileon_SF_272	sfileon3	16	Sa_ATB-M2-j3-exp3-ileon_PA_272.d	(04/21/17 00:00:00)	Sa_ATB-M2-j3-exp3-ileon_PA_272	paileon3	183	Sa_ATB-M2-j3-exp3-ileon_BA_272.d	(01/21/17 00:00:00)	Sa_ATB-M2-j3-exp3-ileon_BA_272	baileon3	20	Sa_ATB-M2-j3-exp3-ileon_GCMRM_272.D	(02/11/17 00:00:00)	Sa_ATB-M2-j3-exp3-ileon_272	gcileon3	18
AKKERMANSIA-j14-exp3-ileon_329	Sa_AKKERMANSIA-M5-j14-exp3-ileon_SF_329.d	(03/01/17 00:00:00)	Sa_AKKERMANSIA-M5-j14-exp3-ileon_SF_329	sfileon3	17	Sa_AKKERMANSIA-M5-j14-exp3-ileon_PA_329.d	(04/21/17 00:00:00)	Sa_AKKERMANSIA-M5-j14-exp3-ileon_PA_329	paileon3	184	Sa_AKKERMANSIA-M5-j14-exp3-ileon_BA_329.d	(01/21/17 00:00:00)	Sa_AKKERMANSIA-M5-j14-exp3-ileon_BA_329	baileon3	21	Sa_AKKERMANSIA-M5-j14-exp3-ileon_GCMRM_329.D	(02/11/17 00:00:00)	Sa_AKKERMANSIA-M5-j14-exp3-ileon_329	gcileon3	19
Nacl-j7-exp3-ileon_290	Sa_Nacl-M2-j7-exp3-ileon_SF_290.d	(03/01/17 00:00:00)	Sa_Nacl-M2-j7-exp3-ileon_SF_290	sfileon3	18	Sa_Nacl-M2-j7-exp3-ileon_PA_290.d	(04/21/17 00:00:00)	Sa_Nacl-M2-j7-exp3-ileon_PA_290	paileon3	185	Sa_Nacl-M2-j7-exp3-ileon_BA_290.d	(01/21/17 00:00:00)	Sa_Nacl-M2-j7-exp3-ileon_BA_290	baileon3	22	Sa_Nacl-M2-j7-exp3-ileon_GCMRM_290.D	(02/11/17 00:00:00)	Sa_Nacl-M2-j7-exp3-ileon_290	gcileon3	20
FECES-j3-exp3-ileon_278	Sa_FECES-M2-j3-exp3-ileon_SF_278.d	(03/01/17 00:00:00)	Sa_FECES-M2-j3-exp3-ileon_SF_278	sfileon3	19	Sa_FECES-M2-j3-exp3-ileon_PA_278.d	(04/21/17 00:00:00)	Sa_FECES-M2-j3-exp3-ileon_PA_278	paileon3	186	Sa_FECES-M2-j3-exp3-ileon_BA_278.d	(01/21/17 00:00:00)	Sa_FECES-M2-j3-exp3-ileon_BA_278	baileon3	23	Sa_FECES-M2-j3-exp3-ileon_GCMRM_278.D	(02/11/17 00:00:00)	Sa_FECES-M2-j3-exp3-ileon_278	gcileon3	21
AKKERMANSIA-j3-exp3-ileon_284	Sa_AKKERMANSIA-M2-j3-exp3-ileon_SF_284.d	(03/01/17 00:00:00)	Sa_AKKERMANSIA-M2-j3-exp3-ileon_SF_284	sfileon3	20	Sa_AKKERMANSIA-M2-j3-exp3-ileon_PA_284.d	(04/21/17 00:00:00)	Sa_AKKERMANSIA-M2-j3-exp3-ileon_PA_284	paileon3	187	Sa_AKKERMANSIA-M2-j3-exp3-ileon_BA_284.d	(01/21/17 00:00:00)	Sa_AKKERMANSIA-M2-j3-exp3-ileon_BA_284	baileon3	24	Sa_AKKERMANSIA-M2-j3-exp3-ileon_GCMRM_284.D	(02/11/17 00:00:00)	Sa_AKKERMANSIA-M2-j3-exp3-ileon_284	gcileon3	22
ATB-j7-exp3-ileon_296	Sa_ATB-M2-j7-exp3-ileon_SF_296.d	(03/01/17 00:00:00)	Sa_ATB-M2-j7-exp3-ileon_SF_296	sfileon3	21	Sa_ATB-M2-j7-exp3-ileon_PA_296.d	(04/21/17 00:00:00)	Sa_ATB-M2-j7-exp3-ileon_PA_296	paileon3	188	Sa_ATB-M2-j7-exp3-ileon_BA_296.d	(01/21/17 00:00:00)	Sa_ATB-M2-j7-exp3-ileon_BA_296	baileon3	25	Sa_ATB-M2-j7-exp3-ileon_GCMRM_296.D	(02/11/17 00:00:00)	Sa_ATB-M2-j7-exp3-ileon_296	gcileon3	23
Nacl-j3-exp3-ileon_268	Sa_Nacl-M4-j3-exp3-ileon_SF_268.d	(03/01/17 00:00:00)	Sa_Nacl-M4-j3-exp3-ileon_SF_268	sfileon3	22	Sa_Nacl-M4-j3-exp3-ileon_PA_268.d	(04/21/17 00:00:00)	Sa_Nacl-M4-j3-exp3-ileon_PA_268	paileon3	189	Sa_Nacl-M4-j3-exp3-ileon_BA_268.d	(01/21/17 00:00:00)	Sa_Nacl-M4-j3-exp3-ileon_BA_268	baileon3	26	Sa_Nacl-M4-j3-exp3-ileon_GCMRM_268.D	(02/11/17 00:00:00)	Sa_Nacl-M4-j3-exp3-ileon_268	gcileon3	24
AKKERMANSIA-j14-exp3-ileon_325	Sa_AKKERMANSIA-M1-j14-exp3-ileon_SF_325.d	(03/01/17 00:00:00)	Sa_AKKERMANSIA-M1-j14-exp3-ileon_SF_325	sfileon3	23	Sa_AKKERMANSIA-M1-j14-exp3-ileon_PA_325.d	(04/21/17 00:00:00)	Sa_AKKERMANSIA-M1-j14-exp3-ileon_PA_325	paileon3	190	Sa_AKKERMANSIA-M1-j14-exp3-ileon_BA_325.d	(01/21/17 00:00:00)	Sa_AKKERMANSIA-M1-j14-exp3-ileon_BA_325	baileon3	27	Sa_AKKERMANSIA-M1-j14-exp3-ileon_GCMRM_325.D	(02/11/17 00:00:00)	Sa_AKKERMANSIA-M1-j14-exp3-ileon_325	gcileon3	25
ATB-j3-exp3-ileon_275	Sa_ATB-M5-j3-exp3-ileon_SF_275.d	(03/01/17 00:00:00)	Sa_ATB-M5-j3-exp3-ileon_SF_275	sfileon3	25	Sa_ATB-M5-j3-exp3-ileon_PA_275.d	(04/21/17 00:00:00)	Sa_ATB-M5-j3-exp3-ileon_PA_275	paileon3	192	Sa_ATB-M5-j3-exp3-ileon_BA_275.d	(01/21/17 00:00:00)	Sa_ATB-M5-j3-exp3-ileon_BA_275	baileon3	29	Sa_ATB-M5-j3-exp3-ileon_GCMRM_275.D	(02/11/17 00:00:00)	Sa_ATB-M5-j3-exp3-ileon_275	gcileon3	27
AKKERMANSIA-j3-exp3-ileon_286	Sa_AKKERMANSIA-M4-j3-exp3-ileon_SF_286b.d	(03/01/17 00:00:00)	Sa_AKKERMANSIA-M4-j3-exp3-ileon_SF_286b	sfileon3	75	Sa_AKKERMANSIA-M4-j3-exp3-ileon_PA_286.d	(04/21/17 00:00:00)	Sa_AKKERMANSIA-M4-j3-exp3-ileon_PA_286	paileon3	176	Sa_AKKERMANSIA-M4-j3-exp3-ileon_BA_286.d	(01/21/17 00:00:00)	Sa_AKKERMANSIA-M4-j3-exp3-ileon_BA_286	baileon3	13	Sa_AKKERMANSIA-M4-j3-exp3-ileon_GCMRM_286.D	(02/11/17 00:00:00)	Sa_AKKERMANSIA-M4-j3-exp3-ileon_286	gcileon3	11
FECES-j7-exp3-ileon_305	Sa_FECES-M5-j7-exp3-ileon_SF_305.d	(03/01/17 00:00:00)	Sa_FECES-M5-j7-exp3-ileon_SF_305	sfileon3	26	Sa_FECES-M5-j7-exp3-ileon_PA_305.d	(04/21/17 00:00:00)	Sa_FECES-M5-j7-exp3-ileon_PA_305	paileon3	193	Sa_FECES-M5-j7-exp3-ileon_BA_305.d	(01/21/17 00:00:00)	Sa_FECES-M5-j7-exp3-ileon_BA_305	baileon3	30	Sa_FECES-M5-j7-exp3-ileon_GCMRM_305.D	(02/11/17 00:00:00)	Sa_FECES-M5-j7-exp3-ileon_305	gcileon3	28
AKKERMANSIA-j7-exp3-ileon_310	Sa_AKKERMANSIA-M4-j7-exp3-ileon_SF_310.d	(03/01/17 00:00:00)	Sa_AKKERMANSIA-M4-j7-exp3-ileon_SF_310	sfileon3	27	Sa_AKKERMANSIA-M4-j7-exp3-ileon_PA_310.d	(04/21/17 00:00:00)	Sa_AKKERMANSIA-M4-j7-exp3-ileon_PA_310	paileon3	194	Sa_AKKERMANSIA-M4-j7-exp3-ileon_BA_310.d	(01/21/17 00:00:00)	Sa_AKKERMANSIA-M4-j7-exp3-ileon_BA_310	baileon3	31	Sa_AKKERMANSIA-M4-j7-exp3-ileon_GCMRM_310.D	(02/11/17 00:00:00)	Sa_AKKERMANSIA-M4-j7-exp3-ileon_310	gcileon3	29
ATB-j14-exp3-ileon_317	Sa_ATB-M5-j14-exp3-ileon_SF_317.d	(03/01/17 00:00:00)	Sa_ATB-M5-j14-exp3-ileon_SF_317	sfileon3	28	Sa_ATB-M5-j14-exp3-ileon_PA_317.d	(04/21/17 00:00:00)	Sa_ATB-M5-j14-exp3-ileon_PA_317	paileon3	195	Sa_ATB-M5-j14-exp3-ileon_BA_317.d	(01/21/17 00:00:00)	Sa_ATB-M5-j14-exp3-ileon_BA_317	baileon3	32	Sa_ATB-M5-j14-exp3-ileon_GCMRM_317.D	(02/11/17 00:00:00)	Sa_ATB-M5-j14-exp3-ileon_317	gcileon3	30
Nacl-j7-exp3-ileon_292	Sa_Nacl-M4-j7-exp3-ileon_SF_292.d	(03/01/17 00:00:00)	Sa_Nacl-M4-j7-exp3-ileon_SF_292	sfileon3	29	Sa_Nacl-M4-j7-exp3-ileon_PA_292.d	(04/21/17 00:00:00)	Sa_Nacl-M4-j7-exp3-ileon_PA_292	paileon3	196	Sa_Nacl-M4-j7-exp3-ileon_BA_292.d	(01/21/17 00:00:00)	Sa_Nacl-M4-j7-exp3-ileon_BA_292	baileon3	33	Sa_Nacl-M4-j7-exp3-ileon_GCMRM_292.D	(02/11/17 00:00:00)	Sa_Nacl-M4-j7-exp3-ileon_292	gcileon3	31
AKKERMANSIA-j7-exp3-ileon_307	Sa_AKKERMANSIA-M1-j7-exp3-ileon_SF_307b.d	(03/01/17 00:00:00)	Sa_AKKERMANSIA-M1-j7-exp3-ileon_SF_307b	sfileon3	74	Sa_AKKERMANSIA-M1-j7-exp3-ileon_PA_307.d	(04/21/17 00:00:00)	Sa_AKKERMANSIA-M1-j7-exp3-ileon_PA_307	paileon3	181	Sa_AKKERMANSIA-M1-j7-exp3-ileon_BA_307.d	(01/21/17 00:00:00)	Sa_AKKERMANSIA-M1-j7-exp3-ileon_BA_307	baileon3	18	Sa_AKKERMANSIA-M1-j7-exp3-ileon_GCMRM_307.D	(02/11/17 00:00:00)	Sa_AKKERMANSIA-M1-j7-exp3-ileon_307	gcileon3	16
FECES-j14-exp3-ileon_322	Sa_FECES-M4-j14-exp3-ileon_SF_322.d	(03/01/17 00:00:00)	Sa_FECES-M4-j14-exp3-ileon_SF_322	sfileon3	30	Sa_FECES-M4-j14-exp3-ileon_PA_322.d	(04/21/17 00:00:00)	Sa_FECES-M4-j14-exp3-ileon_PA_322	paileon3	197	Sa_FECES-M4-j14-exp3-ileon_BA_322.d	(01/21/17 00:00:00)	Sa_FECES-M4-j14-exp3-ileon_BA_322	baileon3	34	Sa_FECES-M4-j14-exp3-ileon_GCMRM_322.D	(02/11/17 00:00:00)	Sa_FECES-M4-j14-exp3-ileon_322	gcileon3	32
ATB-j7-exp3-ileon_299	Sa_ATB-M5-j7-exp3-ileon_SF_299.d	(03/01/17 00:00:00)	Sa_ATB-M5-j7-exp3-ileon_SF_299	sfileon3	31	Sa_ATB-M5-j7-exp3-ileon_PA_299.d	(04/21/17 00:00:00)	Sa_ATB-M5-j7-exp3-ileon_PA_299	paileon3	198	Sa_ATB-M5-j7-exp3-ileon_BA_299.d	(01/21/17 00:00:00)	Sa_ATB-M5-j7-exp3-ileon_BA_299	baileon3	35	Sa_ATB-M5-j7-exp3-ileon_GCMRM_299.D	(02/11/17 00:00:00)	Sa_ATB-M5-j7-exp3-ileon_299	gcileon3	33
AKKERMANSIA-j3-exp3-ileon_283	Sa_AKKERMANSIA-M1-j3-exp3-ileon_SF_283.d	(03/01/17 00:00:00)	Sa_AKKERMANSIA-M1-j3-exp3-ileon_SF_283	sfileon3	32	Sa_AKKERMANSIA-M1-j3-exp3-ileon_PA_283.d	(04/21/17 00:00:00)	Sa_AKKERMANSIA-M1-j3-exp3-ileon_PA_283	paileon3	199	Sa_AKKERMANSIA-M1-j3-exp3-ileon_BA_283.d	(01/21/17 00:00:00)	Sa_AKKERMANSIA-M1-j3-exp3-ileon_BA_283	baileon3	36	Sa_AKKERMANSIA-M1-j3-exp3-ileon_GCMRM_283.D	(02/11/17 00:00:00)	Sa_AKKERMANSIA-M1-j3-exp3-ileon_283	gcileon3	34
FECES-j7-exp3-ileon_302	Sa_FECES-M2-j7-exp3-ileon_SF_302.d	(03/01/17 00:00:00)	Sa_FECES-M2-j7-exp3-ileon_SF_302	sfileon3	33	Sa_FECES-M2-j7-exp3-ileon_PA_302.d	(04/21/17 00:00:00)	Sa_FECES-M2-j7-exp3-ileon_PA_302	paileon3	200	Sa_FECES-M2-j7-exp3-ileon_BA_302.d	(01/21/17 00:00:00)	Sa_FECES-M2-j7-exp3-ileon_BA_302	baileon3	37	Sa_FECES-M2-j7-exp3-ileon_GCMRM_302.D	(02/11/17 00:00:00)	Sa_FECES-M2-j7-exp3-ileon_302	gcileon3	35
Nacl-j3-exp3-ileon_270	Sa_Nacl-M6-j3-exp3-ileon_SF_270.d	(03/01/17 00:00:00)	Sa_Nacl-M6-j3-exp3-ileon_SF_270	sfileon3	34	Sa_Nacl-M6-j3-exp3-ileon_PA_270.d	(04/21/17 00:00:00)	Sa_Nacl-M6-j3-exp3-ileon_PA_270	paileon3	201	Sa_Nacl-M6-j3-exp3-ileon_BA_270.d	(01/21/17 00:00:00)	Sa_Nacl-M6-j3-exp3-ileon_BA_270	baileon3	38	Sa_Nacl-M6-j3-exp3-ileon_GCMRM_270.D	(02/11/17 00:00:00)	Sa_Nacl-M6-j3-exp3-ileon_270	gcileon3	36
AKKERMANSIA-j14-exp3-ileon_328	Sa_AKKERMANSIA-M4-j14-exp3-ileon_SF_328.d	(03/01/17 00:00:00)	Sa_AKKERMANSIA-M4-j14-exp3-ileon_SF_328	sfileon3	35	Sa_AKKERMANSIA-M4-j14-exp3-ileon_PA_328.d	(04/21/17 00:00:00)	Sa_AKKERMANSIA-M4-j14-exp3-ileon_PA_328	paileon3	202	Sa_AKKERMANSIA-M4-j14-exp3-ileon_BA_328.d	(01/21/17 00:00:00)	Sa_AKKERMANSIA-M4-j14-exp3-ileon_BA_328	baileon3	39	Sa_AKKERMANSIA-M4-j14-exp3-ileon_GCMRM_328.D	(02/11/17 00:00:00)	Sa_AKKERMANSIA-M4-j14-exp3-ileon_328	gcileon3	37
FECES-j3-exp3-ileon_281	Sa_FECES-M5-j3-exp3-ileon_SF_281.d	(03/01/17 00:00:00)	Sa_FECES-M5-j3-exp3-ileon_SF_281	sfileon3	37	Sa_FECES-M5-j3-exp3-ileon_PA_281.d	(04/21/17 00:00:00)	Sa_FECES-M5-j3-exp3-ileon_PA_281	paileon3	204	Sa_FECES-M5-j3-exp3-ileon_BA_281.d	(01/21/17 00:00:00)	Sa_FECES-M5-j3-exp3-ileon_BA_281	baileon3	41	Sa_FECES-M5-j3-exp3-ileon_GCMRM_281.D	(02/11/17 00:00:00)	Sa_FECES-M5-j3-exp3-ileon_281	gcileon3	39
ATB-j3-exp3-ileon_271	Sa_ATB-M1-j3-exp3-ileon_SF_271.d	(03/01/17 00:00:00)	Sa_ATB-M1-j3-exp3-ileon_SF_271	sfileon3	38	Sa_ATB-M1-j3-exp3-ileon_PA_271.d	(04/21/17 00:00:00)	Sa_ATB-M1-j3-exp3-ileon_PA_271	paileon3	205	Sa_ATB-M1-j3-exp3-ileon_BA_271.d	(01/21/17 00:00:00)	Sa_ATB-M1-j3-exp3-ileon_BA_271	baileon3	42	Sa_ATB-M1-j3-exp3-ileon_GCMRM_271.D	(02/11/17 00:00:00)	Sa_ATB-M1-j3-exp3-ileon_271	gcileon3	40
FECES-j14-exp3-ileon_324	Sa_FECES-M6-j14-exp3-ileon_SF_324.d	(03/01/17 00:00:00)	Sa_FECES-M6-j14-exp3-ileon_SF_324	sfileon3	39	Sa_FECES-M6-j14-exp3-ileon_PA_324.d	(04/21/17 00:00:00)	Sa_FECES-M6-j14-exp3-ileon_PA_324	paileon3	206	Sa_FECES-M6-j14-exp3-ileon_BA_324.d	(01/21/17 00:00:00)	Sa_FECES-M6-j14-exp3-ileon_BA_324	baileon3	43	Sa_FECES-M6-j14-exp3-ileon_GCMRM_324.D	(02/11/17 00:00:00)	Sa_FECES-M6-j14-exp3-ileon_324	gcileon3	41
AKKERMANSIA-j7-exp3-ileon_308	Sa_AKKERMANSIA-M2-j7-exp3-ileon_SF_308.d	(03/01/17 00:00:00)	Sa_AKKERMANSIA-M2-j7-exp3-ileon_SF_308	sfileon3	40	Sa_AKKERMANSIA-M2-j7-exp3-ileon_PA_308.d	(04/21/17 00:00:00)	Sa_AKKERMANSIA-M2-j7-exp3-ileon_PA_308	paileon3	207	Sa_AKKERMANSIA-M2-j7-exp3-ileon_BA_308.d	(01/21/17 00:00:00)	Sa_AKKERMANSIA-M2-j7-exp3-ileon_BA_308	baileon3	44	Sa_AKKERMANSIA-M2-j7-exp3-ileon_GCMRM_308.D	(02/11/17 00:00:00)	Sa_AKKERMANSIA-M2-j7-exp3-ileon_308	gcileon3	42
Nacl-j3-exp3-ileon_266	Sa_Nacl-M2-j3-exp3-ileon_SF_266.d	(03/01/17 00:00:00)	Sa_Nacl-M2-j3-exp3-ileon_SF_266	sfileon3	41	Sa_Nacl-M2-j3-exp3-ileon_PA_266.d	(04/21/17 00:00:00)	Sa_Nacl-M2-j3-exp3-ileon_PA_266	paileon3	208	Sa_Nacl-M2-j3-exp3-ileon_BA_266.d	(01/21/17 00:00:00)	Sa_Nacl-M2-j3-exp3-ileon_BA_266	baileon3	45	Sa_Nacl-M2-j3-exp3-ileon_GCMRM_266.D	(02/11/17 00:00:00)	Sa_Nacl-M2-j3-exp3-ileon_266	gcileon3	43
ATB-j14-exp3-ileon_316	Sa_ATB-M4-j14-exp3-ileon_SF_316.d	(03/01/17 00:00:00)	Sa_ATB-M4-j14-exp3-ileon_SF_316	sfileon3	42	Sa_ATB-M4-j14-exp3-ileon_PA_316.d	(04/21/17 00:00:00)	Sa_ATB-M4-j14-exp3-ileon_PA_316	paileon3	209	Sa_ATB-M4-j14-exp3-ileon_BA_316.d	(01/21/17 00:00:00)	Sa_ATB-M4-j14-exp3-ileon_BA_316	baileon3	46	Sa_ATB-M4-j14-exp3-ileon_GCMRM_316.D	(02/11/17 00:00:00)	Sa_ATB-M4-j14-exp3-ileon_316	gcileon3	44
AKKERMANSIA-j3-exp3-ileon_287	Sa_AKKERMANSIA-M5-j3-exp3-ileon_SF_287.d	(03/01/17 00:00:00)	Sa_AKKERMANSIA-M5-j3-exp3-ileon_SF_287	sfileon3	43	Sa_AKKERMANSIA-M5-j3-exp3-ileon_PA_287.d	(04/21/17 00:00:00)	Sa_AKKERMANSIA-M5-j3-exp3-ileon_PA_287	paileon3	210	Sa_AKKERMANSIA-M5-j3-exp3-ileon_BA_287.d	(01/21/17 00:00:00)	Sa_AKKERMANSIA-M5-j3-exp3-ileon_BA_287	baileon3	47	Sa_AKKERMANSIA-M5-j3-exp3-ileon_GCMRM_287.D	(02/11/17 00:00:00)	Sa_AKKERMANSIA-M5-j3-exp3-ileon_287	gcileon3	45
FECES-j7-exp3-ileon_303	Sa_FECES-M3-j7-exp3-ileon_SF_303.d	(03/01/17 00:00:00)	Sa_FECES-M3-j7-exp3-ileon_SF_303	sfileon3	44	Sa_FECES-M3-j7-exp3-ileon_PA_303.d	(04/21/17 00:00:00)	Sa_FECES-M3-j7-exp3-ileon_PA_303	paileon3	211	Sa_FECES-M3-j7-exp3-ileon_BA_303.d	(01/21/17 00:00:00)	Sa_FECES-M3-j7-exp3-ileon_BA_303	baileon3	48	Sa_FECES-M3-j7-exp3-ileon_GCMRM_303.D	(02/11/17 00:00:00)	Sa_FECES-M3-j7-exp3-ileon_303	gcileon3	46
Nacl-j3-exp2-ileon_266	Sa_Nacl-M2-j3-exp2-ileon_SF_266.d	(03/01/17 00:00:00)	Sa_Nacl-M2-j3-exp2-ileon_SF_266	sfileon2	82	Sa_Nacl-M2-j3-exp2-ileon_PA_266.d	(04/18/17 00:00:00)	Sa_Nacl-M2-j3-exp2-ileon_PA_266	paileon2	4	Sa_Nacl-M2-j3-exp2-ileon_BA_266.d	(01/21/17 00:00:00)	Sa_Nacl-M2-j3-exp2-ileon_BA_266	baileon2	87	Sa_Nacl-M2-j3-exp2-ileon_GCMRM_266.D	(02/23/17 00:00:00)	Sa_Nacl-M2-j3-exp2-ileon_266	gcileon2	178
ATB-j7-exp3-ileon_298	Sa_ATB-M4-j7-exp3-ileon_SF_298.d	(03/01/17 00:00:00)	Sa_ATB-M4-j7-exp3-ileon_SF_298	sfileon3	45	Sa_ATB-M4-j7-exp3-ileon_PA_298.d	(04/21/17 00:00:00)	Sa_ATB-M4-j7-exp3-ileon_PA_298	paileon3	212	Sa_ATB-M4-j7-exp3-ileon_BA_298.d	(01/21/17 00:00:00)	Sa_ATB-M4-j7-exp3-ileon_BA_298	baileon3	49	Sa_ATB-M4-j7-exp3-ileon_GCMRM_298.D	(02/11/17 00:00:00)	Sa_ATB-M4-j7-exp3-ileon_298	gcileon3	47
ATB-j3-exp2-ileon_274	Sa_ATB-M4-j3-exp2-ileon_SF_274.d	(03/01/17 00:00:00)	Sa_ATB-M4-j3-exp2-ileon_SF_274	sfileon2	83	Sa_ATB-M4-j3-exp2-ileon_PA_274.d	(04/18/17 00:00:00)	Sa_ATB-M4-j3-exp2-ileon_PA_274	paileon2	5	Sa_ATB-M4-j3-exp2-ileon_BA_274.d	(01/21/17 00:00:00)	Sa_ATB-M4-j3-exp2-ileon_BA_274	baileon2	88	Sa_ATB-M4-j3-exp2-ileon_GCMRM_274.D	(02/23/17 00:00:00)	Sa_ATB-M4-j3-exp2-ileon_274	gcileon2	179
AKKERMANSIA-j14-exp3-ileon_326	Sa_AKKERMANSIA-M2-j14-exp3-ileon_SF_326.d	(03/01/17 00:00:00)	Sa_AKKERMANSIA-M2-j14-exp3-ileon_SF_326	sfileon3	46	Sa_AKKERMANSIA-M2-j14-exp3-ileon_PA_326.d	(04/21/17 00:00:00)	Sa_AKKERMANSIA-M2-j14-exp3-ileon_PA_326	paileon3	213	Sa_AKKERMANSIA-M2-j14-exp3-ileon_BA_326.d	(01/21/17 00:00:00)	Sa_AKKERMANSIA-M2-j14-exp3-ileon_BA_326	baileon3	50	Sa_AKKERMANSIA-M2-j14-exp3-ileon_GCMRM_326.D	(02/11/17 00:00:00)	Sa_AKKERMANSIA-M2-j14-exp3-ileon_326	gcileon3	48
MITSUAKI-j3-exp2-ileon_286	Sa_MITSUAKI-M4-j3-exp2-ileon_SF_286.d	(03/01/17 00:00:00)	Sa_MITSUAKI-M4-j3-exp2-ileon_SF_286	sfileon2	84	Sa_MITSUAKI-M4-j3-exp2-ileon_PA_286.d	(04/18/17 00:00:00)	Sa_MITSUAKI-M4-j3-exp2-ileon_PA_286	paileon2	6	Sa_MITSUAKI-M4-j3-exp2-ileon_BA_286.d	(01/21/17 00:00:00)	Sa_MITSUAKI-M4-j3-exp2-ileon_BA_286	baileon2	89	Sa_MITSUAKI-M4-j3-exp2-ileon_GCMRM_286.D	(02/23/17 00:00:00)	Sa_MITSUAKI-M4-j3-exp2-ileon_286	gcileon2	180
Nacl-j7-exp3-ileon_289	Sa_Nacl-M1-j7-exp3-ileon_SF_289.d	(03/01/17 00:00:00)	Sa_Nacl-M1-j7-exp3-ileon_SF_289	sfileon3	47	Sa_Nacl-M1-j7-exp3-ileon_PA_289.d	(04/21/17 00:00:00)	Sa_Nacl-M1-j7-exp3-ileon_PA_289	paileon3	214	Sa_Nacl-M1-j7-exp3-ileon_BA_289.d	(01/21/17 00:00:00)	Sa_Nacl-M1-j7-exp3-ileon_BA_289	baileon3	51	Sa_Nacl-M1-j7-exp3-ileon_GCMRM_289.D	(02/11/17 00:00:00)	Sa_Nacl-M1-j7-exp3-ileon_289	gcileon3	49
MITSUAKI-j7-exp2-ileon_310	Sa_MITSUAKI-M4-j7-exp2-ileon_SF_310.d	(03/01/17 00:00:00)	Sa_MITSUAKI-M4-j7-exp2-ileon_SF_310	sfileon2	86	Sa_MITSUAKI-M4-j7-exp2-ileon_PA_310.d	(04/18/17 00:00:00)	Sa_MITSUAKI-M4-j7-exp2-ileon_PA_310	paileon2	7	Sa_MITSUAKI-M4-j7-exp2-ileon_BA_310.d	(01/21/17 00:00:00)	Sa_MITSUAKI-M4-j7-exp2-ileon_BA_310	baileon2	91	Sa_MITSUAKI-M4-j7-exp2-ileon_GCMRM_310.D	(02/23/17 00:00:00)	Sa_MITSUAKI-M4-j7-exp2-ileon_310	gcileon2	182
FECES-j3-exp3-ileon_279	Sa_FECES-M3-j3-exp3-ileon_SF_279.d	(03/01/17 00:00:00)	Sa_FECES-M3-j3-exp3-ileon_SF_279	sfileon3	49	Sa_FECES-M3-j3-exp3-ileon_PA_279.d	(04/21/17 00:00:00)	Sa_FECES-M3-j3-exp3-ileon_PA_279	paileon3	216	Sa_FECES-M3-j3-exp3-ileon_BA_279.d	(01/21/17 00:00:00)	Sa_FECES-M3-j3-exp3-ileon_BA_279	baileon3	53	Sa_FECES-M3-j3-exp3-ileon_GCMRM_279.D	(02/11/17 00:00:00)	Sa_FECES-M3-j3-exp3-ileon_279	gcileon3	51
BURKO-j3-exp2-ileon_280	Sa_BURKO-M4-j3-exp2-ileon_SF_280.d	(03/01/17 00:00:00)	Sa_BURKO-M4-j3-exp2-ileon_SF_280	sfileon2	87	Sa_BURKO-M4-j3-exp2-ileon_PA_280.d	(04/18/17 00:00:00)	Sa_BURKO-M4-j3-exp2-ileon_PA_280	paileon2	8	Sa_BURKO-M4-j3-exp2-ileon_BA_280.d	(01/21/17 00:00:00)	Sa_BURKO-M4-j3-exp2-ileon_BA_280	baileon2	92	Sa_BURKO-M4-j3-exp2-ileon_GCMRM_280.D	(02/23/17 00:00:00)	Sa_BURKO-M4-j3-exp2-ileon_280	gcileon2	183
AKKERMANSIA-j7-exp3-ileon_309	Sa_AKKERMANSIA-M3-j7-exp3-ileon_SF_309.d	(03/01/17 00:00:00)	Sa_AKKERMANSIA-M3-j7-exp3-ileon_SF_309	sfileon3	50	Sa_AKKERMANSIA-M3-j7-exp3-ileon_PA_309.d	(04/21/17 00:00:00)	Sa_AKKERMANSIA-M3-j7-exp3-ileon_PA_309	paileon3	217	Sa_AKKERMANSIA-M3-j7-exp3-ileon_BA_309.d	(01/21/17 00:00:00)	Sa_AKKERMANSIA-M3-j7-exp3-ileon_BA_309	baileon3	54	Sa_AKKERMANSIA-M3-j7-exp3-ileon_GCMRM_309.D	(02/11/17 00:00:00)	Sa_AKKERMANSIA-M3-j7-exp3-ileon_309	gcileon3	52
ATB-j14-exp2-ileon_317	Sa_ATB-M5-j14-exp2-ileon_SF_317.d	(03/01/17 00:00:00)	Sa_ATB-M5-j14-exp2-ileon_SF_317	sfileon2	88	Sa_ATB-M5-j14-exp2-ileon_PA_317.d	(04/18/17 00:00:00)	Sa_ATB-M5-j14-exp2-ileon_PA_317	paileon2	9	Sa_ATB-M5-j14-exp2-ileon_BA_317.d	(01/21/17 00:00:00)	Sa_ATB-M5-j14-exp2-ileon_BA_317	baileon2	93	Sa_ATB-M5-j14-exp2-ileon_GCMRM_317.D	(02/23/17 00:00:00)	Sa_ATB-M5-j14-exp2-ileon_317	gcileon2	184
ATB-j3-exp3-ileon_274	Sa_ATB-M4-j3-exp3-ileon_SF_274.d	(03/01/17 00:00:00)	Sa_ATB-M4-j3-exp3-ileon_SF_274	sfileon3	51	Sa_ATB-M4-j3-exp3-ileon_PA_274.d	(04/21/17 00:00:00)	Sa_ATB-M4-j3-exp3-ileon_PA_274	paileon3	218	Sa_ATB-M4-j3-exp3-ileon_BA_274.d	(01/21/17 00:00:00)	Sa_ATB-M4-j3-exp3-ileon_BA_274	baileon3	55	Sa_ATB-M4-j3-exp3-ileon_GCMRM_274.D	(02/11/17 00:00:00)	Sa_ATB-M4-j3-exp3-ileon_274	gcileon3	53
Nacl-j7-exp2-ileon_293	Sa_Nacl-M5-j7-exp2-ileon_SF_293.d	(03/01/17 00:00:00)	Sa_Nacl-M5-j7-exp2-ileon_SF_293	sfileon2	89	Sa_Nacl-M5-j7-exp2-ileon_PA_293.d	(04/18/17 00:00:00)	Sa_Nacl-M5-j7-exp2-ileon_PA_293	paileon2	10	Sa_Nacl-M5-j7-exp2-ileon_BA_293.d	(01/21/17 00:00:00)	Sa_Nacl-M5-j7-exp2-ileon_BA_293	baileon2	94	Sa_Nacl-M5-j7-exp2-ileon_GCMRM_293.D	(02/23/17 00:00:00)	Sa_Nacl-M5-j7-exp2-ileon_293	gcileon2	185
AKKERMANSIA-j14-exp3-ileon_330	Sa_AKKERMANSIA-M6-j14-exp3-ileon_SF_330.d	(03/01/17 00:00:00)	Sa_AKKERMANSIA-M6-j14-exp3-ileon_SF_330	sfileon3	52	Sa_AKKERMANSIA-M6-j14-exp3-ileon_PA_330.d	(04/21/17 00:00:00)	Sa_AKKERMANSIA-M6-j14-exp3-ileon_PA_330	paileon3	219	Sa_AKKERMANSIA-M6-j14-exp3-ileon_BA_330.d	(01/21/17 00:00:00)	Sa_AKKERMANSIA-M6-j14-exp3-ileon_BA_330	baileon3	56	Sa_AKKERMANSIA-M6-j14-exp3-ileon_GCMRM_330.D	(02/11/17 00:00:00)	Sa_AKKERMANSIA-M6-j14-exp3-ileon_330	gcileon3	54
BURKO-j14-exp2-ileon_323	Sa_BURKO-M5-j14-exp2-ileon_SF_323.d	(03/01/17 00:00:00)	Sa_BURKO-M5-j14-exp2-ileon_SF_323	sfileon2	90	Sa_BURKO-M5-j14-exp2-ileon_PA_323.d	(04/18/17 00:00:00)	Sa_BURKO-M5-j14-exp2-ileon_PA_323	paileon2	11	Sa_BURKO-M5-j14-exp2-ileon_BA_323.d	(01/21/17 00:00:00)	Sa_BURKO-M5-j14-exp2-ileon_BA_323	baileon2	95	Sa_BURKO-M5-j14-exp2-ileon_GCMRM_323.D	(02/23/17 00:00:00)	Sa_BURKO-M5-j14-exp2-ileon_323	gcileon2	186
FECES-j7-exp3-ileon_306	Sa_FECES-M6-j7-exp3-ileon_SF_306.d	(03/01/17 00:00:00)	Sa_FECES-M6-j7-exp3-ileon_SF_306	sfileon3	53	Sa_FECES-M6-j7-exp3-ileon_PA_306.d	(04/21/17 00:00:00)	Sa_FECES-M6-j7-exp3-ileon_PA_306	paileon3	220	Sa_FECES-M6-j7-exp3-ileon_BA_306.d	(01/21/17 00:00:00)	Sa_FECES-M6-j7-exp3-ileon_BA_306	baileon3	57	Sa_FECES-M6-j7-exp3-ileon_GCMRM_306.D	(02/11/17 00:00:00)	Sa_FECES-M6-j7-exp3-ileon_306	gcileon3	55
BURKO-j7-exp2-ileon_304	Sa_BURKO-M4-j7-exp2-ileon_SF_304.d	(03/01/17 00:00:00)	Sa_BURKO-M4-j7-exp2-ileon_SF_304	sfileon2	91	Sa_BURKO-M4-j7-exp2-ileon_PA_304.d	(04/18/17 00:00:00)	Sa_BURKO-M4-j7-exp2-ileon_PA_304	paileon2	13	Sa_BURKO-M4-j7-exp2-ileon_BA_304.d	(01/21/17 00:00:00)	Sa_BURKO-M4-j7-exp2-ileon_BA_304	baileon2	97	Sa_BURKO-M4-j7-exp2-ileon_GCMRM_304.D	(02/23/17 00:00:00)	Sa_BURKO-M4-j7-exp2-ileon_304	gcileon2	188
ATB-j14-exp3-ileon_315	Sa_ATB-M3-j14-exp3-ileon_SF_315.d	(03/01/17 00:00:00)	Sa_ATB-M3-j14-exp3-ileon_SF_315	sfileon3	54	Sa_ATB-M3-j14-exp3-ileon_PA_315.d	(04/21/17 00:00:00)	Sa_ATB-M3-j14-exp3-ileon_PA_315	paileon3	221	Sa_ATB-M3-j14-exp3-ileon_BA_315.d	(01/21/17 00:00:00)	Sa_ATB-M3-j14-exp3-ileon_BA_315	baileon3	58	Sa_ATB-M3-j14-exp3-ileon_GCMRM_315.D	(02/11/17 00:00:00)	Sa_ATB-M3-j14-exp3-ileon_315	gcileon3	56
Nacl-j7-exp3-ileon_294	Sa_Nacl-M6-j7-exp3-ileon_SF_294.d	(03/01/17 00:00:00)	Sa_Nacl-M6-j7-exp3-ileon_SF_294	sfileon3	55	Sa_Nacl-M6-j7-exp3-ileon_PA_294.d	(04/21/17 00:00:00)	Sa_Nacl-M6-j7-exp3-ileon_PA_294	paileon3	222	Sa_Nacl-M6-j7-exp3-ileon_BA_294.d	(01/21/17 00:00:00)	Sa_Nacl-M6-j7-exp3-ileon_BA_294	baileon3	59	Sa_Nacl-M6-j7-exp3-ileon_GCMRM_294.D	(02/11/17 00:00:00)	Sa_Nacl-M6-j7-exp3-ileon_294	gcileon3	57
BURKO-j3-exp2-ileon_279	Sa_BURKO-M3-j3-exp2-ileon_SF_279.d	(03/01/17 00:00:00)	Sa_BURKO-M3-j3-exp2-ileon_SF_279	sfileon2	93	Sa_BURKO-M3-j3-exp2-ileon_PA_279.d	(04/18/17 00:00:00)	Sa_BURKO-M3-j3-exp2-ileon_PA_279	paileon2	15	Sa_BURKO-M3-j3-exp2-ileon_BA_279.d	(01/21/17 00:00:00)	Sa_BURKO-M3-j3-exp2-ileon_BA_279	baileon2	99	Sa_BURKO-M3-j3-exp2-ileon_GCMRM_279.D	(02/23/17 00:00:00)	Sa_BURKO-M3-j3-exp2-ileon_279	gcileon2	190
AKKERMANSIA-j3-exp3-ileon_285	Sa_AKKERMANSIA-M3-j3-exp3-ileon_SF_285.d	(03/01/17 00:00:00)	Sa_AKKERMANSIA-M3-j3-exp3-ileon_SF_285	sfileon3	56	Sa_AKKERMANSIA-M3-j3-exp3-ileon_PA_285.d	(04/21/17 00:00:00)	Sa_AKKERMANSIA-M3-j3-exp3-ileon_PA_285	paileon3	223	Sa_AKKERMANSIA-M3-j3-exp3-ileon_BA_285.d	(01/21/17 00:00:00)	Sa_AKKERMANSIA-M3-j3-exp3-ileon_BA_285	baileon3	60	Sa_AKKERMANSIA-M3-j3-exp3-ileon_GCMRM_285.D	(02/11/17 00:00:00)	Sa_AKKERMANSIA-M3-j3-exp3-ileon_285	gcileon3	58
Nacl-j3-exp2-ileon_269	Sa_Nacl-M5-j3-exp2-ileon_SF_269.d	(03/01/17 00:00:00)	Sa_Nacl-M5-j3-exp2-ileon_SF_269	sfileon2	94	Sa_Nacl-M5-j3-exp2-ileon_PA_269.d	(04/18/17 00:00:00)	Sa_Nacl-M5-j3-exp2-ileon_PA_269	paileon2	16	Sa_Nacl-M5-j3-exp2-ileon_BA_269.d	(01/21/17 00:00:00)	Sa_Nacl-M5-j3-exp2-ileon_BA_269	baileon2	100	Sa_Nacl-M5-j3-exp2-ileon_GCMRM_269.D	(02/23/17 00:00:00)	Sa_Nacl-M5-j3-exp2-ileon_269	gcileon2	191
ATB-j7-exp3-ileon_295	Sa_ATB-M1-j7-exp3-ileon_SF_295.d	(03/01/17 00:00:00)	Sa_ATB-M1-j7-exp3-ileon_SF_295	sfileon3	57	Sa_ATB-M1-j7-exp3-ileon_PA_295.d	(04/21/17 00:00:00)	Sa_ATB-M1-j7-exp3-ileon_PA_295	paileon3	224	Sa_ATB-M1-j7-exp3-ileon_BA_295.d	(01/21/17 00:00:00)	Sa_ATB-M1-j7-exp3-ileon_BA_295	baileon3	61	Sa_ATB-M1-j7-exp3-ileon_GCMRM_295.D	(02/11/17 00:00:00)	Sa_ATB-M1-j7-exp3-ileon_295	gcileon3	59
ATB-j3-exp2-ileon_273	Sa_ATB-M3-j3-exp2-ileon_SF_273.d	(03/01/17 00:00:00)	Sa_ATB-M3-j3-exp2-ileon_SF_273	sfileon2	95	Sa_ATB-M3-j3-exp2-ileon_PA_273.d	(04/18/17 00:00:00)	Sa_ATB-M3-j3-exp2-ileon_PA_273	paileon2	17	Sa_ATB-M3-j3-exp2-ileon_BA_273.d	(01/21/17 00:00:00)	Sa_ATB-M3-j3-exp2-ileon_BA_273	baileon2	101	Sa_ATB-M3-j3-exp2-ileon_GCMRM_273.D	(02/23/17 00:00:00)	Sa_ATB-M3-j3-exp2-ileon_273	gcileon2	192
FECES-j14-exp3-ileon_319	Sa_FECES-M1-j14-exp3-ileon_SF_319.d	(03/01/17 00:00:00)	Sa_FECES-M1-j14-exp3-ileon_SF_319	sfileon3	58	Sa_FECES-M1-j14-exp3-ileon_PA_319.d	(04/21/17 00:00:00)	Sa_FECES-M1-j14-exp3-ileon_PA_319	paileon3	225	Sa_FECES-M1-j14-exp3-ileon_BA_319.d	(01/21/17 00:00:00)	Sa_FECES-M1-j14-exp3-ileon_BA_319	baileon3	62	Sa_FECES-M1-j14-exp3-ileon_GCMRM_319.D	(02/11/17 00:00:00)	Sa_FECES-M1-j14-exp3-ileon_319	gcileon3	60
MITSUAKI-j3-exp2-ileon_285	Sa_MITSUAKI-M3-j3-exp2-ileon_SF_285.d	(03/01/17 00:00:00)	Sa_MITSUAKI-M3-j3-exp2-ileon_SF_285	sfileon2	96	Sa_MITSUAKI-M3-j3-exp2-ileon_PA_285.d	(04/18/17 00:00:00)	Sa_MITSUAKI-M3-j3-exp2-ileon_PA_285	paileon2	18	Sa_MITSUAKI-M3-j3-exp2-ileon_BA_285.d	(01/21/17 00:00:00)	Sa_MITSUAKI-M3-j3-exp2-ileon_BA_285	baileon2	102	Sa_MITSUAKI-M3-j3-exp2-ileon_GCMRM_285.D	(02/23/17 00:00:00)	Sa_MITSUAKI-M3-j3-exp2-ileon_285	gcileon2	193
Nacl-j3-exp3-ileon_265	Sa_Nacl-M1-j3-exp3-ileon_SF_265.d	(03/01/17 00:00:00)	Sa_Nacl-M1-j3-exp3-ileon_SF_265	sfileon3	59	Sa_Nacl-M1-j3-exp3-ileon_PA_265.d	(04/21/17 00:00:00)	Sa_Nacl-M1-j3-exp3-ileon_PA_265	paileon3	226	Sa_Nacl-M1-j3-exp3-ileon_BA_265.d	(01/21/17 00:00:00)	Sa_Nacl-M1-j3-exp3-ileon_BA_265	baileon3	63	Sa_Nacl-M1-j3-exp3-ileon_GCMRM_265.D	(02/11/17 00:00:00)	Sa_Nacl-M1-j3-exp3-ileon_265	gcileon3	61
BURKO-j7-exp2-ileon_303	Sa_BURKO-M3-j7-exp2-ileon_SF_303.d	(03/01/17 00:00:00)	Sa_BURKO-M3-j7-exp2-ileon_SF_303	sfileon2	97	Sa_BURKO-M3-j7-exp2-ileon_PA_303.d	(04/18/17 00:00:00)	Sa_BURKO-M3-j7-exp2-ileon_PA_303	paileon2	19	Sa_BURKO-M3-j7-exp2-ileon_BA_303.d	(01/21/17 00:00:00)	Sa_BURKO-M3-j7-exp2-ileon_BA_303	baileon2	103	Sa_BURKO-M3-j7-exp2-ileon_GCMRM_303.D	(02/23/17 00:00:00)	Sa_BURKO-M3-j7-exp2-ileon_303	gcileon2	194
ATB-j7-exp2-ileon_297	Sa_ATB-M3-j7-exp2-ileon_SF_297.d	(03/01/17 00:00:00)	Sa_ATB-M3-j7-exp2-ileon_SF_297	sfileon2	98	Sa_ATB-M3-j7-exp2-ileon_PA_297.d	(04/18/17 00:00:00)	Sa_ATB-M3-j7-exp2-ileon_PA_297	paileon2	20	Sa_ATB-M3-j7-exp2-ileon_BA_297.d	(01/21/17 00:00:00)	Sa_ATB-M3-j7-exp2-ileon_BA_297	baileon2	104	Sa_ATB-M3-j7-exp2-ileon_GCMRM_297.D	(02/23/17 00:00:00)	Sa_ATB-M3-j7-exp2-ileon_297	gcileon2	195
ATB-j14-exp3-ileon_318	Sa_ATB-M6-j14-exp3-ileon_SF_318.d	(03/01/17 00:00:00)	Sa_ATB-M6-j14-exp3-ileon_SF_318	sfileon3	61	Sa_ATB-M6-j14-exp3-ileon_PA_318.d	(04/21/17 00:00:00)	Sa_ATB-M6-j14-exp3-ileon_PA_318	paileon3	228	Sa_ATB-M6-j14-exp3-ileon_BA_318.d	(01/21/17 00:00:00)	Sa_ATB-M6-j14-exp3-ileon_BA_318	baileon3	65	Sa_ATB-M6-j14-exp3-ileon_GCMRM_318.D	(02/11/17 00:00:00)	Sa_ATB-M6-j14-exp3-ileon_318	gcileon3	63
MITSUAKI-j14-exp2-ileon_328	Sa_MITSUAKI-M4-j14-exp2-ileon_SF_328.d	(03/01/17 00:00:00)	Sa_MITSUAKI-M4-j14-exp2-ileon_SF_328	sfileon2	99	Sa_MITSUAKI-M4-j14-exp2-ileon_PA_328.d	(04/18/17 00:00:00)	Sa_MITSUAKI-M4-j14-exp2-ileon_PA_328	paileon2	21	Sa_MITSUAKI-M4-j14-exp2-ileon_BA_328.d	(01/21/17 00:00:00)	Sa_MITSUAKI-M4-j14-exp2-ileon_BA_328	baileon2	105	Sa_MITSUAKI-M4-j14-exp2-ileon_GCMRM_328.D	(02/23/17 00:00:00)	Sa_MITSUAKI-M4-j14-exp2-ileon_328	gcileon2	196
AKKERMANSIA-j7-exp3-ileon_311	Sa_AKKERMANSIA-M5-j7-exp3-ileon_SF_311.d	(03/01/17 00:00:00)	Sa_AKKERMANSIA-M5-j7-exp3-ileon_SF_311	sfileon3	62	Sa_AKKERMANSIA-M5-j7-exp3-ileon_PA_311.d	(04/21/17 00:00:00)	Sa_AKKERMANSIA-M5-j7-exp3-ileon_PA_311	paileon3	229	Sa_AKKERMANSIA-M5-j7-exp3-ileon_BA_311.d	(01/21/17 00:00:00)	Sa_AKKERMANSIA-M5-j7-exp3-ileon_BA_311	baileon3	66	Sa_AKKERMANSIA-M5-j7-exp3-ileon_GCMRM_311.D	(02/11/17 00:00:00)	Sa_AKKERMANSIA-M5-j7-exp3-ileon_311	gcileon3	64
BURKO-j14-exp2-ileon_322	Sa_BURKO-M4-j14-exp2-ileon_SF_322.d	(03/01/17 00:00:00)	Sa_BURKO-M4-j14-exp2-ileon_SF_322	sfileon2	100	Sa_BURKO-M4-j14-exp2-ileon_PA_322.d	(04/18/17 00:00:00)	Sa_BURKO-M4-j14-exp2-ileon_PA_322	paileon2	22	Sa_BURKO-M4-j14-exp2-ileon_BA_322.d	(01/21/17 00:00:00)	Sa_BURKO-M4-j14-exp2-ileon_BA_322	baileon2	106	Sa_BURKO-M4-j14-exp2-ileon_GCMRM_322.D	(02/23/17 00:00:00)	Sa_BURKO-M4-j14-exp2-ileon_322	gcileon2	197
FECES-j3-exp3-ileon_277	Sa_FECES-M1-j3-exp3-ileon_SF_277.d	(03/01/17 00:00:00)	Sa_FECES-M1-j3-exp3-ileon_SF_277	sfileon3	63	Sa_FECES-M1-j3-exp3-ileon_PA_277.d	(04/21/17 00:00:00)	Sa_FECES-M1-j3-exp3-ileon_PA_277	paileon3	230	Sa_FECES-M1-j3-exp3-ileon_BA_277.d	(01/21/17 00:00:00)	Sa_FECES-M1-j3-exp3-ileon_BA_277	baileon3	67	Sa_FECES-M1-j3-exp3-ileon_GCMRM_277.D	(02/11/17 00:00:00)	Sa_FECES-M1-j3-exp3-ileon_277	gcileon3	65
ATB-j7-exp2-ileon_298	Sa_ATB-M4-j7-exp2-ileon_SF_298.d	(03/01/17 00:00:00)	Sa_ATB-M4-j7-exp2-ileon_SF_298	sfileon2	85	Sa_ATB-M4-j7-exp2-ileon_PA_298b.d	(04/18/17 00:00:00)	Sa_ATB-M4-j7-exp2-ileon_PA_298b	paileon2	72	Sa_ATB-M4-j7-exp2-ileon_BA_298.d	(01/21/17 00:00:00)	Sa_ATB-M4-j7-exp2-ileon_BA_298	baileon2	90	Sa_ATB-M4-j7-exp2-ileon_GCMRM_298.D	(02/23/17 00:00:00)	Sa_ATB-M4-j7-exp2-ileon_298	gcileon2	181
ATB-j14-exp2-ileon_316	Sa_ATB-M4-j14-exp2-ileon_SF_316.d	(03/01/17 00:00:00)	Sa_ATB-M4-j14-exp2-ileon_SF_316	sfileon2	101	Sa_ATB-M4-j14-exp2-ileon_PA_316.d	(04/18/17 00:00:00)	Sa_ATB-M4-j14-exp2-ileon_PA_316	paileon2	23	Sa_ATB-M4-j14-exp2-ileon_BA_316.d	(01/21/17 00:00:00)	Sa_ATB-M4-j14-exp2-ileon_BA_316	baileon2	107	Sa_ATB-M4-j14-exp2-ileon_GCMRM_316.D	(02/23/17 00:00:00)	Sa_ATB-M4-j14-exp2-ileon_316	gcileon2	198
ATB-j7-exp3-ileon_300	Sa_ATB-M6-j7-exp3-ileon_SF_300.d	(03/01/17 00:00:00)	Sa_ATB-M6-j7-exp3-ileon_SF_300	sfileon3	64	Sa_ATB-M6-j7-exp3-ileon_PA_300.d	(04/21/17 00:00:00)	Sa_ATB-M6-j7-exp3-ileon_PA_300	paileon3	231	Sa_ATB-M6-j7-exp3-ileon_BA_300.d	(01/21/17 00:00:00)	Sa_ATB-M6-j7-exp3-ileon_BA_300	baileon3	68	Sa_ATB-M6-j7-exp3-ileon_GCMRM_300.D	(02/11/17 00:00:00)	Sa_ATB-M6-j7-exp3-ileon_300	gcileon3	66
Nacl-j7-exp2-ileon_291	Sa_Nacl-M3-j7-exp2-ileon_SF_291.d	(03/01/17 00:00:00)	Sa_Nacl-M3-j7-exp2-ileon_SF_291	sfileon2	102	Sa_Nacl-M3-j7-exp2-ileon_PA_291.d	(04/18/17 00:00:00)	Sa_Nacl-M3-j7-exp2-ileon_PA_291	paileon2	24	Sa_Nacl-M3-j7-exp2-ileon_BA_291.d	(01/21/17 00:00:00)	Sa_Nacl-M3-j7-exp2-ileon_BA_291	baileon2	108	Sa_Nacl-M3-j7-exp2-ileon_GCMRM_291.D	(02/23/17 00:00:00)	Sa_Nacl-M3-j7-exp2-ileon_291	gcileon2	199
Nacl-j7-exp3-ileon_293	Sa_Nacl-M5-j7-exp3-ileon_SF_293.d	(03/01/17 00:00:00)	Sa_Nacl-M5-j7-exp3-ileon_SF_293	sfileon3	65	Sa_Nacl-M5-j7-exp3-ileon_PA_293.d	(04/21/17 00:00:00)	Sa_Nacl-M5-j7-exp3-ileon_PA_293	paileon3	232	Sa_Nacl-M5-j7-exp3-ileon_BA_293.d	(01/21/17 00:00:00)	Sa_Nacl-M5-j7-exp3-ileon_BA_293	baileon3	69	Sa_Nacl-M5-j7-exp3-ileon_GCMRM_293.D	(02/11/17 00:00:00)	Sa_Nacl-M5-j7-exp3-ileon_293	gcileon3	67
FECES-j14-exp3-ileon_320	Sa_FECES-M2-j14-exp3-ileon_SF_320.d	(03/01/17 00:00:00)	Sa_FECES-M2-j14-exp3-ileon_SF_320	sfileon3	66	Sa_FECES-M2-j14-exp3-ileon_PA_320.d	(04/21/17 00:00:00)	Sa_FECES-M2-j14-exp3-ileon_PA_320	paileon3	233	Sa_FECES-M2-j14-exp3-ileon_BA_320.d	(01/21/17 00:00:00)	Sa_FECES-M2-j14-exp3-ileon_BA_320	baileon3	70	Sa_FECES-M2-j14-exp3-ileon_GCMRM_320.D	(02/11/17 00:00:00)	Sa_FECES-M2-j14-exp3-ileon_320	gcileon3	68
ATB-j3-exp2-ileon_272	Sa_ATB-M2-j3-exp2-ileon_SF_272.d	(03/01/17 00:00:00)	Sa_ATB-M2-j3-exp2-ileon_SF_272	sfileon2	104	Sa_ATB-M2-j3-exp2-ileon_PA_272.d	(04/18/17 00:00:00)	Sa_ATB-M2-j3-exp2-ileon_PA_272	paileon2	26	Sa_ATB-M2-j3-exp2-ileon_BA_272.d	(01/21/17 00:00:00)	Sa_ATB-M2-j3-exp2-ileon_BA_272	baileon2	110	Sa_ATB-M2-j3-exp2-ileon_GCMRM_272.D	(02/23/17 00:00:00)	Sa_ATB-M2-j3-exp2-ileon_272	gcileon2	201
ATB-j3-exp3-ileon_276	Sa_ATB-M6-j3-exp3-ileon_SF_276.d	(03/01/17 00:00:00)	Sa_ATB-M6-j3-exp3-ileon_SF_276	sfileon3	67	Sa_ATB-M6-j3-exp3-ileon_PA_276.d	(04/21/17 00:00:00)	Sa_ATB-M6-j3-exp3-ileon_PA_276	paileon3	234	Sa_ATB-M6-j3-exp3-ileon_BA_276.d	(01/21/17 00:00:00)	Sa_ATB-M6-j3-exp3-ileon_BA_276	baileon3	71	Sa_ATB-M6-j3-exp3-ileon_GCMRM_276.D	(02/11/17 00:00:00)	Sa_ATB-M6-j3-exp3-ileon_276	gcileon3	69
BURKO-j14-exp2-ileon_321	Sa_BURKO-M3-j14-exp2-ileon_SF_321.d	(03/01/17 00:00:00)	Sa_BURKO-M3-j14-exp2-ileon_SF_321	sfileon2	105	Sa_BURKO-M3-j14-exp2-ileon_PA_321.d	(04/18/17 00:00:00)	Sa_BURKO-M3-j14-exp2-ileon_PA_321	paileon2	27	Sa_BURKO-M3-j14-exp2-ileon_BA_321.d	(01/21/17 00:00:00)	Sa_BURKO-M3-j14-exp2-ileon_BA_321	baileon2	111	Sa_BURKO-M3-j14-exp2-ileon_GCMRM_321.D	(02/23/17 00:00:00)	Sa_BURKO-M3-j14-exp2-ileon_321	gcileon2	202
MITSUAKI-j14-exp2-ileon_329	Sa_MITSUAKI-M5-j14-exp2-ileon_SF_329b.d	(03/04/17 00:00:00)	Sa_MITSUAKI-M5-j14-exp2-ileon_SF_329b	sfileon2	150	Sa_MITSUAKI-M5-j14-exp2-ileon_PA_329.d	(04/18/17 00:00:00)	Sa_MITSUAKI-M5-j14-exp2-ileon_PA_329	paileon2	12	Sa_MITSUAKI-M5-j14-exp2-ileon_BA_329.d	(01/21/17 00:00:00)	Sa_MITSUAKI-M5-j14-exp2-ileon_BA_329	baileon2	96	Sa_MITSUAKI-M5-j14-exp2-ileon_GCMRM_329.D	(02/23/17 00:00:00)	Sa_MITSUAKI-M5-j14-exp2-ileon_329	gcileon2	187
AKKERMANSIA-j3-exp3-ileon_288	Sa_AKKERMANSIA-M6-j3-exp3-ileon_SF_288.d	(03/01/17 00:00:00)	Sa_AKKERMANSIA-M6-j3-exp3-ileon_SF_288	sfileon3	68	Sa_AKKERMANSIA-M6-j3-exp3-ileon_PA_288.d	(04/21/17 00:00:00)	Sa_AKKERMANSIA-M6-j3-exp3-ileon_PA_288	paileon3	235	Sa_AKKERMANSIA-M6-j3-exp3-ileon_BA_288.d	(01/21/17 00:00:00)	Sa_AKKERMANSIA-M6-j3-exp3-ileon_BA_288	baileon3	72	Sa_AKKERMANSIA-M6-j3-exp3-ileon_GCMRM_288.D	(02/11/17 00:00:00)	Sa_AKKERMANSIA-M6-j3-exp3-ileon_288	gcileon3	70
FECES-j3-exp3-ileon_282	Sa_FECES-M6-j3-exp3-ileon_SF_282.d	(03/01/17 00:00:00)	Sa_FECES-M6-j3-exp3-ileon_SF_282	sfileon3	69	Sa_FECES-M6-j3-exp3-ileon_PA_282.d	(04/21/17 00:00:00)	Sa_FECES-M6-j3-exp3-ileon_PA_282	paileon3	236	Sa_FECES-M6-j3-exp3-ileon_BA_282.d	(01/21/17 00:00:00)	Sa_FECES-M6-j3-exp3-ileon_BA_282	baileon3	73	Sa_FECES-M6-j3-exp3-ileon_GCMRM_282.D	(02/11/17 00:00:00)	Sa_FECES-M6-j3-exp3-ileon_282	gcileon3	71
MITSUAKI-j3-exp2-ileon_288	Sa_MITSUAKI-M6-j3-exp2-ileon_SF_288.d	(03/01/17 00:00:00)	Sa_MITSUAKI-M6-j3-exp2-ileon_SF_288	sfileon2	107	Sa_MITSUAKI-M6-j3-exp2-ileon_PA_288.d	(04/18/17 00:00:00)	Sa_MITSUAKI-M6-j3-exp2-ileon_PA_288	paileon2	28	Sa_MITSUAKI-M6-j3-exp2-ileon_BA_288.d	(01/21/17 00:00:00)	Sa_MITSUAKI-M6-j3-exp2-ileon_BA_288	baileon2	113	Sa_MITSUAKI-M6-j3-exp2-ileon_GCMRM_288.D	(02/23/17 00:00:00)	Sa_MITSUAKI-M6-j3-exp2-ileon_288	gcileon2	204
ATB-j14-exp3-ileon_313	Sa_ATB-M1-j14-exp3-ileon_SF_313.d	(03/01/17 00:00:00)	Sa_ATB-M1-j14-exp3-ileon_SF_313	sfileon3	70	Sa_ATB-M1-j14-exp3-ileon_PA_313.d	(04/21/17 00:00:00)	Sa_ATB-M1-j14-exp3-ileon_PA_313	paileon3	237	Sa_ATB-M1-j14-exp3-ileon_BA_313.d	(01/21/17 00:00:00)	Sa_ATB-M1-j14-exp3-ileon_BA_313	baileon3	74	Sa_ATB-M1-j14-exp3-ileon_GCMRM_313.D	(02/11/17 00:00:00)	Sa_ATB-M1-j14-exp3-ileon_313	gcileon3	72
ATB-j3-exp2-ileon_276	Sa_ATB-M6-j3-exp2-ileon_SF_276.d	(03/01/17 00:00:00)	Sa_ATB-M6-j3-exp2-ileon_SF_276	sfileon2	108	Sa_ATB-M6-j3-exp2-ileon_PA_276.d	(04/18/17 00:00:00)	Sa_ATB-M6-j3-exp2-ileon_PA_276	paileon2	29	Sa_ATB-M6-j3-exp2-ileon_BA_276.d	(01/21/17 00:00:00)	Sa_ATB-M6-j3-exp2-ileon_BA_276	baileon2	114	Sa_ATB-M6-j3-exp2-ileon_GCMRM_276.D	(02/23/17 00:00:00)	Sa_ATB-M6-j3-exp2-ileon_276	gcileon2	205
AKKERMANSIA-j7-exp3-ileon_312	Sa_AKKERMANSIA-M6-j7-exp3-ileon_SF_312.d	(03/01/17 00:00:00)	Sa_AKKERMANSIA-M6-j7-exp3-ileon_SF_312	sfileon3	71	Sa_AKKERMANSIA-M6-j7-exp3-ileon_PA_312.d	(04/21/17 00:00:00)	Sa_AKKERMANSIA-M6-j7-exp3-ileon_PA_312	paileon3	238	Sa_AKKERMANSIA-M6-j7-exp3-ileon_BA_312.d	(01/21/17 00:00:00)	Sa_AKKERMANSIA-M6-j7-exp3-ileon_BA_312	baileon3	75	Sa_AKKERMANSIA-M6-j7-exp3-ileon_GCMRM_312.D	(02/11/17 00:00:00)	Sa_AKKERMANSIA-M6-j7-exp3-ileon_312	gcileon3	73
BURKO-j3-exp2-ileon_282	Sa_BURKO-M6-j3-exp2-ileon_SF_282.d	(03/01/17 00:00:00)	Sa_BURKO-M6-j3-exp2-ileon_SF_282	sfileon2	109	Sa_BURKO-M6-j3-exp2-ileon_PA_282.d	(04/18/17 00:00:00)	Sa_BURKO-M6-j3-exp2-ileon_PA_282	paileon2	30	Sa_BURKO-M6-j3-exp2-ileon_BA_282.d	(01/21/17 00:00:00)	Sa_BURKO-M6-j3-exp2-ileon_BA_282	baileon2	115	Sa_BURKO-M6-j3-exp2-ileon_GCMRM_282.D	(02/23/17 00:00:00)	Sa_BURKO-M6-j3-exp2-ileon_282	gcileon2	206
FECES-j14-exp3-ileon_321	Sa_FECES-M3-j14-exp3-ileon_SF_321.d	(03/01/17 00:00:00)	Sa_FECES-M3-j14-exp3-ileon_SF_321	sfileon3	72	Sa_FECES-M3-j14-exp3-ileon_PA_321.d	(04/21/17 00:00:00)	Sa_FECES-M3-j14-exp3-ileon_PA_321	paileon3	239	Sa_FECES-M3-j14-exp3-ileon_BA_321.d	(01/21/17 00:00:00)	Sa_FECES-M3-j14-exp3-ileon_BA_321	baileon3	76	Sa_FECES-M3-j14-exp3-ileon_GCMRM_321.D	(02/11/17 00:00:00)	Sa_FECES-M3-j14-exp3-ileon_321	gcileon3	74
Nacl-j7-exp2-ileon_292	Sa_Nacl-M4-j7-exp2-ileon_SF_292.d	(03/01/17 00:00:00)	Sa_Nacl-M4-j7-exp2-ileon_SF_292	sfileon2	110	Sa_Nacl-M4-j7-exp2-ileon_PA_292.d	(04/18/17 00:00:00)	Sa_Nacl-M4-j7-exp2-ileon_PA_292	paileon2	31	Sa_Nacl-M4-j7-exp2-ileon_BA_292.d	(01/21/17 00:00:00)	Sa_Nacl-M4-j7-exp2-ileon_BA_292	baileon2	116	Sa_Nacl-M4-j7-exp2-ileon_GCMRM_292.D	(02/23/17 00:00:00)	Sa_Nacl-M4-j7-exp2-ileon_292	gcileon2	207
MITSUAKI-j7-exp2-ileon_311	Sa_MITSUAKI-M5-j7-exp2-ileon_SF_311.d	(03/01/17 00:00:00)	Sa_MITSUAKI-M5-j7-exp2-ileon_SF_311	sfileon2	111	Sa_MITSUAKI-M5-j7-exp2-ileon_PA_311.d	(04/18/17 00:00:00)	Sa_MITSUAKI-M5-j7-exp2-ileon_PA_311	paileon2	32	Sa_MITSUAKI-M5-j7-exp2-ileon_BA_311.d	(01/21/17 00:00:00)	Sa_MITSUAKI-M5-j7-exp2-ileon_BA_311	baileon2	117	Sa_MITSUAKI-M5-j7-exp2-ileon_GCMRM_311.D	(02/23/17 00:00:00)	Sa_MITSUAKI-M5-j7-exp2-ileon_311	gcileon2	208
MITSUAKI-j14-exp2-ileon_327	Sa_MITSUAKI-M3-j14-exp2-ileon_SF_327.d	(03/01/17 00:00:00)	Sa_MITSUAKI-M3-j14-exp2-ileon_SF_327	sfileon2	113	Sa_MITSUAKI-M3-j14-exp2-ileon_PA_327.d	(04/18/17 00:00:00)	Sa_MITSUAKI-M3-j14-exp2-ileon_PA_327	paileon2	34	Sa_MITSUAKI-M3-j14-exp2-ileon_BA_327.d	(01/21/17 00:00:00)	Sa_MITSUAKI-M3-j14-exp2-ileon_BA_327	baileon2	119	Sa_MITSUAKI-M3-j14-exp2-ileon_GCMRM_327.D	(02/23/17 00:00:00)	Sa_MITSUAKI-M3-j14-exp2-ileon_327	gcileon2	210
ATB-j7-exp2-ileon_296	Sa_ATB-M2-j7-exp2-ileon_SF_296.d	(03/01/17 00:00:00)	Sa_ATB-M2-j7-exp2-ileon_SF_296	sfileon2	114	Sa_ATB-M2-j7-exp2-ileon_PA_296.d	(04/18/17 00:00:00)	Sa_ATB-M2-j7-exp2-ileon_PA_296	paileon2	35	Sa_ATB-M2-j7-exp2-ileon_BA_296.d	(01/21/17 00:00:00)	Sa_ATB-M2-j7-exp2-ileon_BA_296	baileon2	120	Sa_ATB-M2-j7-exp2-ileon_GCMRM_296.D	(02/23/17 00:00:00)	Sa_ATB-M2-j7-exp2-ileon_296	gcileon2	211
BURKO-j7-exp2-ileon_302	Sa_BURKO-M2-j7-exp2-ileon_SF_302.d	(03/01/17 00:00:00)	Sa_BURKO-M2-j7-exp2-ileon_SF_302	sfileon2	115	Sa_BURKO-M2-j7-exp2-ileon_PA_302.d	(04/18/17 00:00:00)	Sa_BURKO-M2-j7-exp2-ileon_PA_302	paileon2	36	Sa_BURKO-M2-j7-exp2-ileon_BA_302.d	(01/21/17 00:00:00)	Sa_BURKO-M2-j7-exp2-ileon_BA_302	baileon2	121	Sa_BURKO-M2-j7-exp2-ileon_GCMRM_302.D	(02/23/17 00:00:00)	Sa_BURKO-M2-j7-exp2-ileon_302	gcileon2	212
HIRAE-j14-exp1-ileon_403	Sa_HIRAE-M1-j14-exp1-ileon_SF_403.d	(03/07/17 00:00:00)	Sa_HIRAE-M1-j14-exp1-ileon_SF_403	sfileon1	159	Sa_HIRAE-M1-j14-exp1-ileon_PA_403.d	(04/21/17 00:00:00)	Sa_HIRAE-M1-j14-exp1-ileon_PA_403	paileon1	79	Sa_HIRAE-M1-j14-exp1-ileon_BA_403b.d	(01/24/17 00:00:00)	Sa_HIRAE-M1-j14-exp1-ileon_BA_403b	baileon1	167	Sa_HIRAE-M1-j14-exp1-ileon_GCMRM_403.D	(02/17/17 00:00:00)	Sa_HIRAE-M1-j14-exp1-ileon_403	gcileon1	82
Nacl-j7-exp2-ileon_290	Sa_Nacl-M2-j7-exp2-ileon_SF_290.d	(03/01/17 00:00:00)	Sa_Nacl-M2-j7-exp2-ileon_SF_290	sfileon2	116	Sa_Nacl-M2-j7-exp2-ileon_PA_290.d	(04/18/17 00:00:00)	Sa_Nacl-M2-j7-exp2-ileon_PA_290	paileon2	37	Sa_Nacl-M2-j7-exp2-ileon_BA_290.d	(01/21/17 00:00:00)	Sa_Nacl-M2-j7-exp2-ileon_BA_290	baileon2	122	Sa_Nacl-M2-j7-exp2-ileon_GCMRM_290.D	(02/23/17 00:00:00)	Sa_Nacl-M2-j7-exp2-ileon_290	gcileon2	213
ATB-j7-exp1-ileon_375	Sa_ATB-M3-j7-exp1-ileon_SF_375.d	(03/07/17 00:00:00)	Sa_ATB-M3-j7-exp1-ileon_SF_375	sfileon1	160	Sa_ATB-M3-j7-exp1-ileon_PA_375.d	(04/21/17 00:00:00)	Sa_ATB-M3-j7-exp1-ileon_PA_375	paileon1	80	Sa_ATB-M3-j7-exp1-ileon_BA_375b.d	(01/24/17 00:00:00)	Sa_ATB-M3-j7-exp1-ileon_BA_375b	baileon1	168	Sa_ATB-M3-j7-exp1-ileon_GCMRM_375.D	(02/17/17 00:00:00)	Sa_ATB-M3-j7-exp1-ileon_375	gcileon1	83
ATB-j7-exp2-ileon_299	Sa_ATB-M5-j7-exp2-ileon_SF_299.d	(03/01/17 00:00:00)	Sa_ATB-M5-j7-exp2-ileon_SF_299	sfileon2	117	Sa_ATB-M5-j7-exp2-ileon_PA_299.d	(04/18/17 00:00:00)	Sa_ATB-M5-j7-exp2-ileon_PA_299	paileon2	38	Sa_ATB-M5-j7-exp2-ileon_BA_299.d	(01/21/17 00:00:00)	Sa_ATB-M5-j7-exp2-ileon_BA_299	baileon2	123	Sa_ATB-M5-j7-exp2-ileon_GCMRM_299.D	(02/23/17 00:00:00)	Sa_ATB-M5-j7-exp2-ileon_299	gcileon2	214
HIRAE-j14-exp1-ileon_407	Sa_HIRAE-M5-j14-exp1-ileon_SF_407.d	(03/07/17 00:00:00)	Sa_HIRAE-M5-j14-exp1-ileon_SF_407	sfileon1	161	Sa_HIRAE-M5-j14-exp1-ileon_PA_407.d	(04/21/17 00:00:00)	Sa_HIRAE-M5-j14-exp1-ileon_PA_407	paileon1	81	Sa_HIRAE-M5-j14-exp1-ileon_BA_407b.d	(01/24/17 00:00:00)	Sa_HIRAE-M5-j14-exp1-ileon_BA_407b	baileon1	169	Sa_HIRAE-M5-j14-exp1-ileon_GCMRM_407.D	(02/17/17 00:00:00)	Sa_HIRAE-M5-j14-exp1-ileon_407	gcileon1	84
BURKO-j3-exp2-ileon_278	Sa_BURKO-M2-j3-exp2-ileon_SF_278.d	(03/01/17 00:00:00)	Sa_BURKO-M2-j3-exp2-ileon_SF_278	sfileon2	118	Sa_BURKO-M2-j3-exp2-ileon_PA_278.d	(04/18/17 00:00:00)	Sa_BURKO-M2-j3-exp2-ileon_PA_278	paileon2	39	Sa_BURKO-M2-j3-exp2-ileon_BA_278.d	(01/21/17 00:00:00)	Sa_BURKO-M2-j3-exp2-ileon_BA_278	baileon2	124	Sa_BURKO-M2-j3-exp2-ileon_GCMRM_278.D	(02/23/17 00:00:00)	Sa_BURKO-M2-j3-exp2-ileon_278	gcileon2	215
Nacl-j7-exp1-ileon_367	Sa_Nacl-M1-j7-exp1-ileon_SF_367.d	(03/07/17 00:00:00)	Sa_Nacl-M1-j7-exp1-ileon_SF_367	sfileon1	162	Sa_Nacl-M1-j7-exp1-ileon_PA_367.d	(04/21/17 00:00:00)	Sa_Nacl-M1-j7-exp1-ileon_PA_367	paileon1	82	Sa_Nacl-M1-j7-exp1-ileon_BA_367b.d	(01/24/17 00:00:00)	Sa_Nacl-M1-j7-exp1-ileon_BA_367b	baileon1	170	Sa_Nacl-M1-j7-exp1-ileon_GCMRM_367.D	(02/17/17 00:00:00)	Sa_Nacl-M1-j7-exp1-ileon_367	gcileon1	85
Nacl-j3-exp2-ileon_268	Sa_Nacl-M4-j3-exp2-ileon_SF_268.d	(03/01/17 00:00:00)	Sa_Nacl-M4-j3-exp2-ileon_SF_268	sfileon2	119	Sa_Nacl-M4-j3-exp2-ileon_PA_268.d	(04/18/17 00:00:00)	Sa_Nacl-M4-j3-exp2-ileon_PA_268	paileon2	40	Sa_Nacl-M4-j3-exp2-ileon_BA_268.d	(01/21/17 00:00:00)	Sa_Nacl-M4-j3-exp2-ileon_BA_268	baileon2	125	Sa_Nacl-M4-j3-exp2-ileon_GCMRM_268.D	(02/23/17 00:00:00)	Sa_Nacl-M4-j3-exp2-ileon_268	gcileon2	216
FRAGILIS-j7-exp1-ileon_389	Sa_FRAGILIS-M5-j7-exp1-ileon_SF_389.d	(03/07/17 00:00:00)	Sa_FRAGILIS-M5-j7-exp1-ileon_SF_389	sfileon1	163	Sa_FRAGILIS-M5-j7-exp1-ileon_PA_389.d	(04/21/17 00:00:00)	Sa_FRAGILIS-M5-j7-exp1-ileon_PA_389	paileon1	83	Sa_FRAGILIS-M5-j7-exp1-ileon_BA_389b.d	(01/24/17 00:00:00)	Sa_FRAGILIS-M5-j7-exp1-ileon_BA_389b	baileon1	171	Sa_FRAGILIS-M5-j7-exp1-ileon_GCMRM_389.D	(02/17/17 00:00:00)	Sa_FRAGILIS-M5-j7-exp1-ileon_389	gcileon1	86
MITSUAKI-j3-exp2-ileon_284	Sa_MITSUAKI-M2-j3-exp2-ileon_SF_284.d	(03/01/17 00:00:00)	Sa_MITSUAKI-M2-j3-exp2-ileon_SF_284	sfileon2	120	Sa_MITSUAKI-M2-j3-exp2-ileon_PA_284.d	(04/18/17 00:00:00)	Sa_MITSUAKI-M2-j3-exp2-ileon_PA_284	paileon2	41	Sa_MITSUAKI-M2-j3-exp2-ileon_BA_284.d	(01/21/17 00:00:00)	Sa_MITSUAKI-M2-j3-exp2-ileon_BA_284	baileon2	126	Sa_MITSUAKI-M2-j3-exp2-ileon_GCMRM_284.D	(02/23/17 00:00:00)	Sa_MITSUAKI-M2-j3-exp2-ileon_284	gcileon2	217
BURKO-j7-exp2-ileon_306	Sa_BURKO-M6-j7-exp2-ileon_SF_306.d	(03/01/17 00:00:00)	Sa_BURKO-M6-j7-exp2-ileon_SF_306	sfileon2	121	Sa_BURKO-M6-j7-exp2-ileon_PA_306.d	(04/18/17 00:00:00)	Sa_BURKO-M6-j7-exp2-ileon_PA_306	paileon2	42	Sa_BURKO-M6-j7-exp2-ileon_BA_306.d	(01/21/17 00:00:00)	Sa_BURKO-M6-j7-exp2-ileon_BA_306	baileon2	127	Sa_BURKO-M6-j7-exp2-ileon_GCMRM_306.D	(02/23/17 00:00:00)	Sa_BURKO-M6-j7-exp2-ileon_306	gcileon2	218
ATB-j14-exp1-ileon_400	Sa_ATB-M4-j14-exp1-ileon_SF_400.d	(03/07/17 00:00:00)	Sa_ATB-M4-j14-exp1-ileon_SF_400	sfileon1	165	Sa_ATB-M4-j14-exp1-ileon_PA_400.d	(04/21/17 00:00:00)	Sa_ATB-M4-j14-exp1-ileon_PA_400	paileon1	85	Sa_ATB-M4-j14-exp1-ileon_BA_400.d	(01/24/17 00:00:00)	Sa_ATB-M4-j14-exp1-ileon_BA_400	baileon1	172	Sa_ATB-M4-j14-exp1-ileon_GCMRM_400.D	(02/17/17 00:00:00)	Sa_ATB-M4-j14-exp1-ileon_400	gcileon1	88
ATB-j14-exp2-ileon_314	Sa_ATB-M2-j14-exp2-ileon_SF_314.d	(03/01/17 00:00:00)	Sa_ATB-M2-j14-exp2-ileon_SF_314	sfileon2	122	Sa_ATB-M2-j14-exp2-ileon_PA_314.d	(04/18/17 00:00:00)	Sa_ATB-M2-j14-exp2-ileon_PA_314	paileon2	43	Sa_ATB-M2-j14-exp2-ileon_BA_314.d	(01/21/17 00:00:00)	Sa_ATB-M2-j14-exp2-ileon_BA_314	baileon2	128	Sa_ATB-M2-j14-exp2-ileon_GCMRM_314.D	(02/23/17 00:00:00)	Sa_ATB-M2-j14-exp2-ileon_314	gcileon2	219
FRAGILIS-j7-exp1-ileon_385	Sa_FRAGILIS-M1-j7-exp1-ileon_SF_385.d	(03/07/17 00:00:00)	Sa_FRAGILIS-M1-j7-exp1-ileon_SF_385	sfileon1	166	Sa_FRAGILIS-M1-j7-exp1-ileon_PA_385.d	(04/21/17 00:00:00)	Sa_FRAGILIS-M1-j7-exp1-ileon_PA_385	paileon1	86	Sa_FRAGILIS-M1-j7-exp1-ileon_BA_385b.d	(01/24/17 00:00:00)	Sa_FRAGILIS-M1-j7-exp1-ileon_BA_385b	baileon1	176	Sa_FRAGILIS-M1-j7-exp1-ileon_GCMRM_385.D	(02/17/17 00:00:00)	Sa_FRAGILIS-M1-j7-exp1-ileon_385	gcileon1	89
ATB-j3-exp1-ileon_343	Sa_ATB-M1-j3-exp1-ileon_SF_343.d	(03/07/17 00:00:00)	Sa_ATB-M1-j3-exp1-ileon_SF_343	sfileon1	168	Sa_ATB-M1-j3-exp1-ileon_PA_343.d	(04/21/17 00:00:00)	Sa_ATB-M1-j3-exp1-ileon_PA_343	paileon1	88	Sa_ATB-M1-j3-exp1-ileon_BA_343.d	(01/24/17 00:00:00)	Sa_ATB-M1-j3-exp1-ileon_BA_343	baileon1	173	Sa_ATB-M1-j3-exp1-ileon_GCMRM_343.D	(02/17/17 00:00:00)	Sa_ATB-M1-j3-exp1-ileon_343	gcileon1	91
MITSUAKI-j7-exp2-ileon_308	Sa_MITSUAKI-M2-j7-exp2-ileon_SF_308.d	(03/01/17 00:00:00)	Sa_MITSUAKI-M2-j7-exp2-ileon_SF_308	sfileon2	124	Sa_MITSUAKI-M2-j7-exp2-ileon_PA_308.d	(04/18/17 00:00:00)	Sa_MITSUAKI-M2-j7-exp2-ileon_PA_308	paileon2	45	Sa_MITSUAKI-M2-j7-exp2-ileon_BA_308.d	(01/21/17 00:00:00)	Sa_MITSUAKI-M2-j7-exp2-ileon_BA_308	baileon2	130	Sa_MITSUAKI-M2-j7-exp2-ileon_GCMRM_308.D	(02/23/17 00:00:00)	Sa_MITSUAKI-M2-j7-exp2-ileon_308	gcileon2	221
BARNECIELA-j14-exp1-ileon_415	Sa_BARNECIELA-M1-j14-exp1-ileon_SF_415.d	(03/07/17 00:00:00)	Sa_BARNECIELA-M1-j14-exp1-ileon_SF_415	sfileon1	167	Sa_BARNECIELA-M1-j14-exp1-ileon_PA_415.d	(04/21/17 00:00:00)	Sa_BARNECIELA-M1-j14-exp1-ileon_PA_415	paileon1	87	Sa_BARNECIELA-M1-j14-exp1-ileon_BA_415b.d	(01/24/17 00:00:00)	Sa_BARNECIELA-M1-j14-exp1-ileon_BA_415b	baileon1	177	Sa_BARNECIELA-M1-j14-exp1-ileon_GCMRM_415.D	(02/17/17 00:00:00)	Sa_BARNECIELA-M1-j14-exp1-ileon_415	gcileon1	90
ATB-j14-exp2-ileon_315	Sa_ATB-M3-j14-exp2-ileon_SF_315.d	(03/01/17 00:00:00)	Sa_ATB-M3-j14-exp2-ileon_SF_315	sfileon2	125	Sa_ATB-M3-j14-exp2-ileon_PA_315.d	(04/18/17 00:00:00)	Sa_ATB-M3-j14-exp2-ileon_PA_315	paileon2	46	Sa_ATB-M3-j14-exp2-ileon_BA_315.d	(01/21/17 00:00:00)	Sa_ATB-M3-j14-exp2-ileon_BA_315	baileon2	131	Sa_ATB-M3-j14-exp2-ileon_GCMRM_315.D	(02/23/17 00:00:00)	Sa_ATB-M3-j14-exp2-ileon_315	gcileon2	222
ATB-j3-exp1-ileon_347	Sa_ATB-M5-j3-exp1-ileon_SF_347.d	(03/07/17 00:00:00)	Sa_ATB-M5-j3-exp1-ileon_SF_347	sfileon1	169	Sa_ATB-M5-j3-exp1-ileon_PA_347.d	(04/21/17 00:00:00)	Sa_ATB-M5-j3-exp1-ileon_PA_347	paileon1	89	Sa_ATB-M5-j3-exp1-ileon_BA_347b.d	(01/24/17 00:00:00)	Sa_ATB-M5-j3-exp1-ileon_BA_347b	baileon1	175	Sa_ATB-M5-j3-exp1-ileon_GCMRM_347.D	(02/17/17 00:00:00)	Sa_ATB-M5-j3-exp1-ileon_347	gcileon1	92
BURKO-j14-exp2-ileon_320	Sa_BURKO-M2-j14-exp2-ileon_SF_320.d	(03/01/17 00:00:00)	Sa_BURKO-M2-j14-exp2-ileon_SF_320	sfileon2	126	Sa_BURKO-M2-j14-exp2-ileon_PA_320.d	(04/18/17 00:00:00)	Sa_BURKO-M2-j14-exp2-ileon_PA_320	paileon2	47	Sa_BURKO-M2-j14-exp2-ileon_BA_320.d	(01/21/17 00:00:00)	Sa_BURKO-M2-j14-exp2-ileon_BA_320	baileon2	132	Sa_BURKO-M2-j14-exp2-ileon_GCMRM_320.D	(02/23/17 00:00:00)	Sa_BURKO-M2-j14-exp2-ileon_320	gcileon2	223
ATB-j7-exp1-ileon_377	Sa_ATB-M5-j7-exp1-ileon_SF_377.d	(03/07/17 00:00:00)	Sa_ATB-M5-j7-exp1-ileon_SF_377	sfileon1	170	Sa_ATB-M5-j7-exp1-ileon_PA_377.d	(04/21/17 00:00:00)	Sa_ATB-M5-j7-exp1-ileon_PA_377	paileon1	90	Sa_ATB-M5-j7-exp1-ileon_BA_377b.d	(01/24/17 00:00:00)	Sa_ATB-M5-j7-exp1-ileon_BA_377b	baileon1	178	Sa_ATB-M5-j7-exp1-ileon_GCMRM_377.D	(02/17/17 00:00:00)	Sa_ATB-M5-j7-exp1-ileon_377	gcileon1	93
MITSUAKI-j14-exp2-ileon_326	Sa_MITSUAKI-M2-j14-exp2-ileon_SF_326.d	(03/01/17 00:00:00)	Sa_MITSUAKI-M2-j14-exp2-ileon_SF_326	sfileon2	127	Sa_MITSUAKI-M2-j14-exp2-ileon_PA_326.d	(04/18/17 00:00:00)	Sa_MITSUAKI-M2-j14-exp2-ileon_PA_326	paileon2	48	Sa_MITSUAKI-M2-j14-exp2-ileon_BA_326.d	(01/21/17 00:00:00)	Sa_MITSUAKI-M2-j14-exp2-ileon_BA_326	baileon2	133	Sa_MITSUAKI-M2-j14-exp2-ileon_GCMRM_326.D	(02/23/17 00:00:00)	Sa_MITSUAKI-M2-j14-exp2-ileon_326	gcileon2	224
ATB-j3-exp2-ileon_275	Sa_ATB-M5-j3-exp2-ileon_SF_275.d	(03/01/17 00:00:00)	Sa_ATB-M5-j3-exp2-ileon_SF_275	sfileon2	128	Sa_ATB-M5-j3-exp2-ileon_PA_275.d	(04/18/17 00:00:00)	Sa_ATB-M5-j3-exp2-ileon_PA_275	paileon2	49	Sa_ATB-M5-j3-exp2-ileon_BA_275.d	(01/21/17 00:00:00)	Sa_ATB-M5-j3-exp2-ileon_BA_275	baileon2	134	Sa_ATB-M5-j3-exp2-ileon_GCMRM_275.D	(02/23/17 00:00:00)	Sa_ATB-M5-j3-exp2-ileon_275	gcileon2	225
BARNECIELA-j3-exp1-ileon_361	Sa_BARNECIELA-M1-j3-exp1-ileon_SF_361.d	(03/07/17 00:00:00)	Sa_BARNECIELA-M1-j3-exp1-ileon_SF_361	sfileon1	172	Sa_BARNECIELA-M1-j3-exp1-ileon_PA_361.d	(04/21/17 00:00:00)	Sa_BARNECIELA-M1-j3-exp1-ileon_PA_361	paileon1	92	Sa_BARNECIELA-M1-j3-exp1-ileon_BA_361b.d	(01/24/17 00:00:00)	Sa_BARNECIELA-M1-j3-exp1-ileon_BA_361b	baileon1	179	Sa_BARNECIELA-M1-j3-exp1-ileon_GCMRM_361.D	(02/17/17 00:00:00)	Sa_BARNECIELA-M1-j3-exp1-ileon_361	gcileon1	95
BURKO-j7-exp2-ileon_301	Sa_BURKO-M1-j7-exp2-ileon_SF_301.d	(03/01/17 00:00:00)	Sa_BURKO-M1-j7-exp2-ileon_SF_301	sfileon2	129	Sa_BURKO-M1-j7-exp2-ileon_PA_301.d	(04/18/17 00:00:00)	Sa_BURKO-M1-j7-exp2-ileon_PA_301	paileon2	50	Sa_BURKO-M1-j7-exp2-ileon_BA_301.d	(01/21/17 00:00:00)	Sa_BURKO-M1-j7-exp2-ileon_BA_301	baileon2	135	Sa_BURKO-M1-j7-exp2-ileon_GCMRM_301.D	(02/23/17 00:00:00)	Sa_BURKO-M1-j7-exp2-ileon_301	gcileon2	226
HIRAE-j3-exp1-ileon_353	Sa_HIRAE-M5-j3-exp1-ileon_SF_353.d	(03/07/17 00:00:00)	Sa_HIRAE-M5-j3-exp1-ileon_SF_353	sfileon1	173	Sa_HIRAE-M5-j3-exp1-ileon_PA_353.d	(04/21/17 00:00:00)	Sa_HIRAE-M5-j3-exp1-ileon_PA_353	paileon1	93	Sa_HIRAE-M5-j3-exp1-ileon_BA_353b.d	(01/24/17 00:00:00)	Sa_HIRAE-M5-j3-exp1-ileon_BA_353b	baileon1	180	Sa_HIRAE-M5-j3-exp1-ileon_GCMRM_353.D	(02/17/17 00:00:00)	Sa_HIRAE-M5-j3-exp1-ileon_353	gcileon1	96
ATB-j7-exp2-ileon_300	Sa_ATB-M6-j7-exp2-ileon_SF_300.d	(03/01/17 00:00:00)	Sa_ATB-M6-j7-exp2-ileon_SF_300	sfileon2	130	Sa_ATB-M6-j7-exp2-ileon_PA_300.d	(04/18/17 00:00:00)	Sa_ATB-M6-j7-exp2-ileon_PA_300	paileon2	51	Sa_ATB-M6-j7-exp2-ileon_BA_300.d	(01/21/17 00:00:00)	Sa_ATB-M6-j7-exp2-ileon_BA_300	baileon2	136	Sa_ATB-M6-j7-exp2-ileon_GCMRM_300.D	(02/23/17 00:00:00)	Sa_ATB-M6-j7-exp2-ileon_300	gcileon2	227
ATB-j14-exp1-ileon_398	Sa_ATB-M2-j14-exp1-ileon_SF_398.d	(03/07/17 00:00:00)	Sa_ATB-M2-j14-exp1-ileon_SF_398	sfileon1	174	Sa_ATB-M2-j14-exp1-ileon_PA_398.d	(04/21/17 00:00:00)	Sa_ATB-M2-j14-exp1-ileon_PA_398	paileon1	94	Sa_ATB-M2-j14-exp1-ileon_BA_398b.d	(01/24/17 00:00:00)	Sa_ATB-M2-j14-exp1-ileon_BA_398b	baileon1	181	Sa_ATB-M2-j14-exp1-ileon_GCMRM_398.D	(02/17/17 00:00:00)	Sa_ATB-M2-j14-exp1-ileon_398	gcileon1	97
Nacl-j7-exp2-ileon_289	Sa_Nacl-M1-j7-exp2-ileon_SF_289.d	(03/01/17 00:00:00)	Sa_Nacl-M1-j7-exp2-ileon_SF_289	sfileon2	131	Sa_Nacl-M1-j7-exp2-ileon_PA_289.d	(04/18/17 00:00:00)	Sa_Nacl-M1-j7-exp2-ileon_PA_289	paileon2	52	Sa_Nacl-M1-j7-exp2-ileon_BA_289.d	(01/21/17 00:00:00)	Sa_Nacl-M1-j7-exp2-ileon_BA_289	baileon2	137	Sa_Nacl-M1-j7-exp2-ileon_GCMRM_289.D	(02/23/17 00:00:00)	Sa_Nacl-M1-j7-exp2-ileon_289	gcileon2	228
BARNECIELA-j3-exp1-ileon_363	Sa_BARNECIELA-M3-j3-exp1-ileon_SF_363.d	(03/07/17 00:00:00)	Sa_BARNECIELA-M3-j3-exp1-ileon_SF_363	sfileon1	175	Sa_BARNECIELA-M3-j3-exp1-ileon_PA_363.d	(04/21/17 00:00:00)	Sa_BARNECIELA-M3-j3-exp1-ileon_PA_363	paileon1	95	Sa_BARNECIELA-M3-j3-exp1-ileon_BA_363.d	(01/24/17 00:00:00)	Sa_BARNECIELA-M3-j3-exp1-ileon_BA_363	baileon1	182	Sa_BARNECIELA-M3-j3-exp1-ileon_GCMRM_363.D	(02/17/17 00:00:00)	Sa_BARNECIELA-M3-j3-exp1-ileon_363	gcileon1	98
BURKO-j3-exp2-ileon_277	Sa_BURKO-M1-j3-exp2-ileon_SF_277.d	(03/01/17 00:00:00)	Sa_BURKO-M1-j3-exp2-ileon_SF_277	sfileon2	132	Sa_BURKO-M1-j3-exp2-ileon_PA_277.d	(04/18/17 00:00:00)	Sa_BURKO-M1-j3-exp2-ileon_PA_277	paileon2	53	Sa_BURKO-M1-j3-exp2-ileon_BA_277.d	(01/21/17 00:00:00)	Sa_BURKO-M1-j3-exp2-ileon_BA_277	baileon2	138	Sa_BURKO-M1-j3-exp2-ileon_GCMRM_277.D	(02/23/17 00:00:00)	Sa_BURKO-M1-j3-exp2-ileon_277	gcileon2	229
Nacl-j3-exp2-ileon_265	Sa_Nacl-M1-j3-exp2-ileon_SF_265.d	(03/01/17 00:00:00)	Sa_Nacl-M1-j3-exp2-ileon_SF_265	sfileon2	133	Sa_Nacl-M1-j3-exp2-ileon_PA_265.d	(04/18/17 00:00:00)	Sa_Nacl-M1-j3-exp2-ileon_PA_265	paileon2	54	Sa_Nacl-M1-j3-exp2-ileon_BA_265.d	(01/21/17 00:00:00)	Sa_Nacl-M1-j3-exp2-ileon_BA_265	baileon2	139	Sa_Nacl-M1-j3-exp2-ileon_GCMRM_265.D	(02/23/17 00:00:00)	Sa_Nacl-M1-j3-exp2-ileon_265	gcileon2	230
HIRAE-j7-exp1-ileon_381	Sa_HIRAE-M3-j7-exp1-ileon_SF_381.d	(03/07/17 00:00:00)	Sa_HIRAE-M3-j7-exp1-ileon_SF_381	sfileon1	177	Sa_HIRAE-M3-j7-exp1-ileon_PA_381.d	(04/21/17 00:00:00)	Sa_HIRAE-M3-j7-exp1-ileon_PA_381	paileon1	97	Sa_HIRAE-M3-j7-exp1-ileon_BA_381.d	(01/24/17 00:00:00)	Sa_HIRAE-M3-j7-exp1-ileon_BA_381	baileon1	183	Sa_HIRAE-M3-j7-exp1-ileon_GCMRM_381.D	(02/17/17 00:00:00)	Sa_HIRAE-M3-j7-exp1-ileon_381	gcileon1	100
ATB-j3-exp2-ileon_271	Sa_ATB-M1-j3-exp2-ileon_SF_271.d	(03/01/17 00:00:00)	Sa_ATB-M1-j3-exp2-ileon_SF_271	sfileon2	134	Sa_ATB-M1-j3-exp2-ileon_PA_271.d	(04/18/17 00:00:00)	Sa_ATB-M1-j3-exp2-ileon_PA_271	paileon2	55	Sa_ATB-M1-j3-exp2-ileon_BA_271.d	(01/21/17 00:00:00)	Sa_ATB-M1-j3-exp2-ileon_BA_271	baileon2	140	Sa_ATB-M1-j3-exp2-ileon_GCMRM_271.D	(02/23/17 00:00:00)	Sa_ATB-M1-j3-exp2-ileon_271	gcileon2	231
Nacl-j3-exp2-ileon_267	Sa_Nacl-M3-j3-exp2-ileon_SF_267.d	(03/01/17 00:00:00)	Sa_Nacl-M3-j3-exp2-ileon_SF_267	sfileon2	106	-	(NA NA)	-	-	-	Sa_Nacl-M3-j3-exp2-ileon_BA_267.d	(01/21/17 00:00:00)	Sa_Nacl-M3-j3-exp2-ileon_BA_267	baileon2	112	Sa_Nacl-M3-j3-exp2-ileon_GCMRM_267.D	(02/23/17 00:00:00)	Sa_Nacl-M3-j3-exp2-ileon_267	gcileon2	203
MITSUAKI-j3-exp2-ileon_283	Sa_MITSUAKI-M1-j3-exp2-ileon_SF_283.d	(03/01/17 00:00:00)	Sa_MITSUAKI-M1-j3-exp2-ileon_SF_283	sfileon2	135	Sa_MITSUAKI-M1-j3-exp2-ileon_PA_283.d	(04/18/17 00:00:00)	Sa_MITSUAKI-M1-j3-exp2-ileon_PA_283	paileon2	56	Sa_MITSUAKI-M1-j3-exp2-ileon_BA_283.d	(01/21/17 00:00:00)	Sa_MITSUAKI-M1-j3-exp2-ileon_BA_283	baileon2	141	Sa_MITSUAKI-M1-j3-exp2-ileon_GCMRM_283.D	(02/23/17 00:00:00)	Sa_MITSUAKI-M1-j3-exp2-ileon_283	gcileon2	232
HIRAE-j7-exp1-ileon_383	Sa_HIRAE-M5-j7-exp1-ileon_SF_383.d	(03/07/17 00:00:00)	Sa_HIRAE-M5-j7-exp1-ileon_SF_383	sfileon1	180	Sa_HIRAE-M5-j7-exp1-ileon_PA_383.d	(04/21/17 00:00:00)	Sa_HIRAE-M5-j7-exp1-ileon_PA_383	paileon1	99	Sa_HIRAE-M5-j7-exp1-ileon_BA_383.d	(01/24/17 00:00:00)	Sa_HIRAE-M5-j7-exp1-ileon_BA_383	baileon1	184	Sa_HIRAE-M5-j7-exp1-ileon_GCMRM_383.D	(02/17/17 00:00:00)	Sa_HIRAE-M5-j7-exp1-ileon_383	gcileon1	103
FRAGILIS-j3-exp1-ileon_357	Sa_FRAGILIS-M3-j3-exp1-ileon_SF_357.d	(03/07/17 00:00:00)	Sa_FRAGILIS-M3-j3-exp1-ileon_SF_357	sfileon1	181	Sa_FRAGILIS-M3-j3-exp1-ileon_PA_357.d	(04/21/17 00:00:00)	Sa_FRAGILIS-M3-j3-exp1-ileon_PA_357	paileon1	100	Sa_FRAGILIS-M3-j3-exp1-ileon_BA_357.d	(01/24/17 00:00:00)	Sa_FRAGILIS-M3-j3-exp1-ileon_BA_357	baileon1	185	Sa_FRAGILIS-M3-j3-exp1-ileon_GCMRM_357.D	(02/17/17 00:00:00)	Sa_FRAGILIS-M3-j3-exp1-ileon_357	gcileon1	104
ATB-j7-exp2-ileon_295	Sa_ATB-M1-j7-exp2-ileon_SF_295.d	(03/04/17 00:00:00)	Sa_ATB-M1-j7-exp2-ileon_SF_295	sfileon2	137	Sa_ATB-M1-j7-exp2-ileon_PA_295.d	(04/18/17 00:00:00)	Sa_ATB-M1-j7-exp2-ileon_PA_295	paileon2	58	Sa_ATB-M1-j7-exp2-ileon_BA_295.d	(01/21/17 00:00:00)	Sa_ATB-M1-j7-exp2-ileon_BA_295	baileon2	143	Sa_ATB-M1-j7-exp2-ileon_GCMRM_295.D	(02/23/17 00:00:00)	Sa_ATB-M1-j7-exp2-ileon_295	gcileon2	234
Nacl-j3-exp1-ileon_337	Sa_Nacl-M1-j3-exp1-ileon_SF_337.d	(03/07/17 00:00:00)	Sa_Nacl-M1-j3-exp1-ileon_SF_337	sfileon1	182	Sa_Nacl-M1-j3-exp1-ileon_PA_337.d	(04/21/17 00:00:00)	Sa_Nacl-M1-j3-exp1-ileon_PA_337	paileon1	101	Sa_Nacl-M1-j3-exp1-ileon_BA_337.d	(01/24/17 00:00:00)	Sa_Nacl-M1-j3-exp1-ileon_BA_337	baileon1	186	Sa_Nacl-M1-j3-exp1-ileon_GCMRM_337.D	(02/17/17 00:00:00)	Sa_Nacl-M1-j3-exp1-ileon_337	gcileon1	105
BURKO-j14-exp2-ileon_319	Sa_BURKO-M1-j14-exp2-ileon_SF_319.d	(03/04/17 00:00:00)	Sa_BURKO-M1-j14-exp2-ileon_SF_319	sfileon2	138	Sa_BURKO-M1-j14-exp2-ileon_PA_319.d	(04/18/17 00:00:00)	Sa_BURKO-M1-j14-exp2-ileon_PA_319	paileon2	59	Sa_BURKO-M1-j14-exp2-ileon_BA_319.d	(01/21/17 00:00:00)	Sa_BURKO-M1-j14-exp2-ileon_BA_319	baileon2	144	Sa_BURKO-M1-j14-exp2-ileon_GCMRM_319.D	(02/23/17 00:00:00)	Sa_BURKO-M1-j14-exp2-ileon_319	gcileon2	235
Nacl-j3-exp2-ileon_270	Sa_Nacl-M6-j3-exp2-ileon_SF_270.d	(03/04/17 00:00:00)	Sa_Nacl-M6-j3-exp2-ileon_SF_270	sfileon2	139	Sa_Nacl-M6-j3-exp2-ileon_PA_270.d	(04/18/17 00:00:00)	Sa_Nacl-M6-j3-exp2-ileon_PA_270	paileon2	60	Sa_Nacl-M6-j3-exp2-ileon_BA_270.d	(01/21/17 00:00:00)	Sa_Nacl-M6-j3-exp2-ileon_BA_270	baileon2	145	Sa_Nacl-M6-j3-exp2-ileon_GCMRM_270.D	(02/23/17 00:00:00)	Sa_Nacl-M6-j3-exp2-ileon_270	gcileon2	236
ATB-j14-exp2-ileon_318	Sa_ATB-M6-j14-exp2-ileon_SF_318.d	(03/04/17 00:00:00)	Sa_ATB-M6-j14-exp2-ileon_SF_318	sfileon2	140	Sa_ATB-M6-j14-exp2-ileon_PA_318.d	(04/18/17 00:00:00)	Sa_ATB-M6-j14-exp2-ileon_PA_318	paileon2	61	Sa_ATB-M6-j14-exp2-ileon_BA_318.d	(01/21/17 00:00:00)	Sa_ATB-M6-j14-exp2-ileon_BA_318	baileon2	146	Sa_ATB-M6-j14-exp2-ileon_GCMRM_318.D	(02/23/17 00:00:00)	Sa_ATB-M6-j14-exp2-ileon_318	gcileon2	237
FRAGILIS-j7-exp1-ileon_390	Sa_FRAGILIS-M6-j7-exp1-ileon_SF_390.d	(03/07/17 00:00:00)	Sa_FRAGILIS-M6-j7-exp1-ileon_SF_390	sfileon1	186	Sa_FRAGILIS-M6-j7-exp1-ileon_PA_390.d	(04/21/17 00:00:00)	Sa_FRAGILIS-M6-j7-exp1-ileon_PA_390	paileon1	104	Sa_FRAGILIS-M6-j7-exp1-ileon_BA_390.d	(01/24/17 00:00:00)	Sa_FRAGILIS-M6-j7-exp1-ileon_BA_390	baileon1	189	Sa_FRAGILIS-M6-j7-exp1-ileon_GCMRM_390.D	(02/17/17 00:00:00)	Sa_FRAGILIS-M6-j7-exp1-ileon_390	gcileon1	109
MITSUAKI-j14-exp2-ileon_325	Sa_MITSUAKI-M1-j14-exp2-ileon_SF_325.d	(03/04/17 00:00:00)	Sa_MITSUAKI-M1-j14-exp2-ileon_SF_325	sfileon2	141	Sa_MITSUAKI-M1-j14-exp2-ileon_PA_325.d	(04/18/17 00:00:00)	Sa_MITSUAKI-M1-j14-exp2-ileon_PA_325	paileon2	62	Sa_MITSUAKI-M1-j14-exp2-ileon_BA_325.d	(01/21/17 00:00:00)	Sa_MITSUAKI-M1-j14-exp2-ileon_BA_325	baileon2	147	Sa_MITSUAKI-M1-j14-exp2-ileon_GCMRM_325.D	(02/23/17 00:00:00)	Sa_MITSUAKI-M1-j14-exp2-ileon_325	gcileon2	238
BARNECIELA-j14-exp1-ileon_420	Sa_BARNECIELA-M6-j14-exp1-ileon_SF_420.d	(03/07/17 00:00:00)	Sa_BARNECIELA-M6-j14-exp1-ileon_SF_420	sfileon1	164	Sa_BARNECIELA-M6-j14-exp1-ileon_PA_420.d	(04/21/17 00:00:00)	Sa_BARNECIELA-M6-j14-exp1-ileon_PA_420	paileon1	84	Sa_BARNECIELA-M6-j14-exp1-ileon_BA_420b.d	(01/27/17 00:00:00)	Sa_BARNECIELA-M6-j14-exp1-ileon_BA_420b	baileon1	255	Sa_BARNECIELA-M6-j14-exp1-ileon_GCMRM_420.D	(02/17/17 00:00:00)	Sa_BARNECIELA-M6-j14-exp1-ileon_420	gcileon1	87
FRAGILIS-j3-exp1-ileon_358	Sa_FRAGILIS-M4-j3-exp1-ileon_SF_358.d	(03/07/17 00:00:00)	Sa_FRAGILIS-M4-j3-exp1-ileon_SF_358	sfileon1	187	Sa_FRAGILIS-M4-j3-exp1-ileon_PA_358.d	(04/21/17 00:00:00)	Sa_FRAGILIS-M4-j3-exp1-ileon_PA_358	paileon1	105	Sa_FRAGILIS-M4-j3-exp1-ileon_BA_358.d	(01/24/17 00:00:00)	Sa_FRAGILIS-M4-j3-exp1-ileon_BA_358	baileon1	190	Sa_FRAGILIS-M4-j3-exp1-ileon_GCMRM_358.D	(02/17/17 00:00:00)	Sa_FRAGILIS-M4-j3-exp1-ileon_358	gcileon1	110
MITSUAKI-j3-exp2-ileon_287	Sa_MITSUAKI-M5-j3-exp2-ileon_SF_287.d	(03/04/17 00:00:00)	Sa_MITSUAKI-M5-j3-exp2-ileon_SF_287	sfileon2	142	Sa_MITSUAKI-M5-j3-exp2-ileon_PA_287.d	(04/18/17 00:00:00)	Sa_MITSUAKI-M5-j3-exp2-ileon_PA_287	paileon2	63	Sa_MITSUAKI-M5-j3-exp2-ileon_BA_287.d	(01/21/17 00:00:00)	Sa_MITSUAKI-M5-j3-exp2-ileon_BA_287	baileon2	148	Sa_MITSUAKI-M5-j3-exp2-ileon_GCMRM_287.D	(02/23/17 00:00:00)	Sa_MITSUAKI-M5-j3-exp2-ileon_287	gcileon2	239
BURKO-j14-exp2-ileon_324	Sa_BURKO-M6-j14-exp2-ileon_SF_324.d	(03/04/17 00:00:00)	Sa_BURKO-M6-j14-exp2-ileon_SF_324	sfileon2	143	Sa_BURKO-M6-j14-exp2-ileon_PA_324.d	(04/18/17 00:00:00)	Sa_BURKO-M6-j14-exp2-ileon_PA_324	paileon2	64	Sa_BURKO-M6-j14-exp2-ileon_BA_324.d	(01/21/17 00:00:00)	Sa_BURKO-M6-j14-exp2-ileon_BA_324	baileon2	149	Sa_BURKO-M6-j14-exp2-ileon_GCMRM_324.D	(02/23/17 00:00:00)	Sa_BURKO-M6-j14-exp2-ileon_324	gcileon2	240
Nacl-j3-exp1-ileon_339	Sa_Nacl-M3-j3-exp1-ileon_SF_339.d	(03/07/17 00:00:00)	Sa_Nacl-M3-j3-exp1-ileon_SF_339	sfileon1	189	Sa_Nacl-M3-j3-exp1-ileon_PA_339.d	(04/21/17 00:00:00)	Sa_Nacl-M3-j3-exp1-ileon_PA_339	paileon1	107	Sa_Nacl-M3-j3-exp1-ileon_BA_339.d	(01/24/17 00:00:00)	Sa_Nacl-M3-j3-exp1-ileon_BA_339	baileon1	191	Sa_Nacl-M3-j3-exp1-ileon_GCMRM_339.D	(02/17/17 00:00:00)	Sa_Nacl-M3-j3-exp1-ileon_339	gcileon1	112
MITSUAKI-j7-exp2-ileon_312	Sa_MITSUAKI-M6-j7-exp2-ileon_SF_312.d	(03/04/17 00:00:00)	Sa_MITSUAKI-M6-j7-exp2-ileon_SF_312	sfileon2	144	Sa_MITSUAKI-M6-j7-exp2-ileon_PA_312.d	(04/18/17 00:00:00)	Sa_MITSUAKI-M6-j7-exp2-ileon_PA_312	paileon2	65	Sa_MITSUAKI-M6-j7-exp2-ileon_BA_312.d	(01/21/17 00:00:00)	Sa_MITSUAKI-M6-j7-exp2-ileon_BA_312	baileon2	150	Sa_MITSUAKI-M6-j7-exp2-ileon_GCMRM_312.D	(02/23/17 00:00:00)	Sa_MITSUAKI-M6-j7-exp2-ileon_312	gcileon2	241
BURKO-j7-exp2-ileon_305	Sa_BURKO-M5-j7-exp2-ileon_SF_305.d	(03/04/17 00:00:00)	Sa_BURKO-M5-j7-exp2-ileon_SF_305	sfileon2	145	Sa_BURKO-M5-j7-exp2-ileon_PA_305.d	(04/18/17 00:00:00)	Sa_BURKO-M5-j7-exp2-ileon_PA_305	paileon2	66	Sa_BURKO-M5-j7-exp2-ileon_BA_305.d	(01/21/17 00:00:00)	Sa_BURKO-M5-j7-exp2-ileon_BA_305	baileon2	151	Sa_BURKO-M5-j7-exp2-ileon_GCMRM_305.D	(02/23/17 00:00:00)	Sa_BURKO-M5-j7-exp2-ileon_305	gcileon2	242
Nacl-j7-exp2-ileon_294	Sa_Nacl-M6-j7-exp2-ileon_SF_294.d	(03/04/17 00:00:00)	Sa_Nacl-M6-j7-exp2-ileon_SF_294	sfileon2	146	Sa_Nacl-M6-j7-exp2-ileon_PA_294.d	(04/18/17 00:00:00)	Sa_Nacl-M6-j7-exp2-ileon_PA_294	paileon2	67	Sa_Nacl-M6-j7-exp2-ileon_BA_294.d	(01/21/17 00:00:00)	Sa_Nacl-M6-j7-exp2-ileon_BA_294	baileon2	152	Sa_Nacl-M6-j7-exp2-ileon_GCMRM_294.D	(02/23/17 00:00:00)	Sa_Nacl-M6-j7-exp2-ileon_294	gcileon2	243
ATB-j3-exp1-ileon_345	Sa_ATB-M3-j3-exp1-ileon_SF_345.d	(03/07/17 00:00:00)	Sa_ATB-M3-j3-exp1-ileon_SF_345	sfileon1	192	Sa_ATB-M3-j3-exp1-ileon_PA_345.d	(04/21/17 00:00:00)	Sa_ATB-M3-j3-exp1-ileon_PA_345	paileon1	110	Sa_ATB-M3-j3-exp1-ileon_BA_345.d	(01/24/17 00:00:00)	Sa_ATB-M3-j3-exp1-ileon_BA_345	baileon1	192	Sa_ATB-M3-j3-exp1-ileon_GCMRM_345.D	(02/17/17 00:00:00)	Sa_ATB-M3-j3-exp1-ileon_345	gcileon1	115
MITSUAKI-j7-exp2-ileon_307	Sa_MITSUAKI-M1-j7-exp2-ileon_SF_307.d	(03/04/17 00:00:00)	Sa_MITSUAKI-M1-j7-exp2-ileon_SF_307	sfileon2	147	Sa_MITSUAKI-M1-j7-exp2-ileon_PA_307.d	(04/18/17 00:00:00)	Sa_MITSUAKI-M1-j7-exp2-ileon_PA_307	paileon2	68	Sa_MITSUAKI-M1-j7-exp2-ileon_BA_307.d	(01/21/17 00:00:00)	Sa_MITSUAKI-M1-j7-exp2-ileon_BA_307	baileon2	153	Sa_MITSUAKI-M1-j7-exp2-ileon_GCMRM_307.D	(02/23/17 00:00:00)	Sa_MITSUAKI-M1-j7-exp2-ileon_307	gcileon2	244
Nacl-j3-exp1-ileon_341	Sa_Nacl-M5-j3-exp1-ileon_SF_341.d	(03/07/17 00:00:00)	Sa_Nacl-M5-j3-exp1-ileon_SF_341	sfileon1	194	Sa_Nacl-M5-j3-exp1-ileon_PA_341.d	(04/21/17 00:00:00)	Sa_Nacl-M5-j3-exp1-ileon_PA_341	paileon1	112	Sa_Nacl-M5-j3-exp1-ileon_BA_341.d	(01/24/17 00:00:00)	Sa_Nacl-M5-j3-exp1-ileon_BA_341	baileon1	193	Sa_Nacl-M5-j3-exp1-ileon_GCMRM_341.D	(02/17/17 00:00:00)	Sa_Nacl-M5-j3-exp1-ileon_341	gcileon1	117
ATB-j14-exp2-ileon_313	Sa_ATB-M1-j14-exp2-ileon_SF_313.d	(03/04/17 00:00:00)	Sa_ATB-M1-j14-exp2-ileon_SF_313	sfileon2	148	Sa_ATB-M1-j14-exp2-ileon_PA_313.d	(04/18/17 00:00:00)	Sa_ATB-M1-j14-exp2-ileon_PA_313	paileon2	69	Sa_ATB-M1-j14-exp2-ileon_BA_313.d	(01/21/17 00:00:00)	Sa_ATB-M1-j14-exp2-ileon_BA_313	baileon2	154	Sa_ATB-M1-j14-exp2-ileon_GCMRM_313.D	(02/23/17 00:00:00)	Sa_ATB-M1-j14-exp2-ileon_313	gcileon2	245
Nacl-j7-exp1-ileon_371	Sa_Nacl-M5-j7-exp1-ileon_SF_371.d	(03/07/17 00:00:00)	Sa_Nacl-M5-j7-exp1-ileon_SF_371	sfileon1	179	Sa_Nacl-M5-j7-exp1-ileon_PA_371.d	(04/21/17 00:00:00)	Sa_Nacl-M5-j7-exp1-ileon_PA_371	paileon1	98	Sa_Nacl-M5-j7-exp1-ileon_BA_371b.d	(01/27/17 00:00:00)	Sa_Nacl-M5-j7-exp1-ileon_BA_371b	baileon1	238	Sa_Nacl-M5-j7-exp1-ileon_GCMRM_371.D	(02/17/17 00:00:00)	Sa_Nacl-M5-j7-exp1-ileon_371	gcileon1	102
BURKO-j3-exp2-ileon_281	Sa_BURKO-M5-j3-exp2-ileon_SF_281.d	(03/04/17 00:00:00)	Sa_BURKO-M5-j3-exp2-ileon_SF_281	sfileon2	149	Sa_BURKO-M5-j3-exp2-ileon_PA_281.d	(04/18/17 00:00:00)	Sa_BURKO-M5-j3-exp2-ileon_PA_281	paileon2	70	Sa_BURKO-M5-j3-exp2-ileon_BA_281.d	(01/21/17 00:00:00)	Sa_BURKO-M5-j3-exp2-ileon_BA_281	baileon2	155	Sa_BURKO-M5-j3-exp2-ileon_GCMRM_281.D	(02/23/17 00:00:00)	Sa_BURKO-M5-j3-exp2-ileon_281	gcileon2	246
BARNECIELA-j7-exp1-ileon_393	Sa_BARNECIELA-M3-j7-exp1-ileon_SF_393.d	(03/07/17 00:00:00)	Sa_BARNECIELA-M3-j7-exp1-ileon_SF_393	sfileon1	176	Sa_BARNECIELA-M3-j7-exp1-ileon_PA_393.d	(04/21/17 00:00:00)	Sa_BARNECIELA-M3-j7-exp1-ileon_PA_393	paileon1	96	Sa_BARNECIELA-M3-j7-exp1-ileon_BA_393b.d	(01/27/17 00:00:00)	Sa_BARNECIELA-M3-j7-exp1-ileon_BA_393b	baileon1	254	Sa_BARNECIELA-M3-j7-exp1-ileon_GCMRM_393.D	(02/17/17 00:00:00)	Sa_BARNECIELA-M3-j7-exp1-ileon_393	gcileon1	99
MITSUAKI-j14-exp2-ileon_330	Sa_MITSUAKI-M6-j14-exp2-ileon_SF_330.d	(03/04/17 00:00:00)	Sa_MITSUAKI-M6-j14-exp2-ileon_SF_330	sfileon2	151	Sa_MITSUAKI-M6-j14-exp2-ileon_PA_330.d	(04/18/17 00:00:00)	Sa_MITSUAKI-M6-j14-exp2-ileon_PA_330	paileon2	71	Sa_MITSUAKI-M6-j14-exp2-ileon_BA_330.d	(01/21/17 00:00:00)	Sa_MITSUAKI-M6-j14-exp2-ileon_BA_330	baileon2	156	Sa_MITSUAKI-M6-j14-exp2-ileon_GCMRM_330.D	(02/23/17 00:00:00)	Sa_MITSUAKI-M6-j14-exp2-ileon_330	gcileon2	247
FRAGILIS-j7-exp1-ileon_387	Sa_FRAGILIS-M3-j7-exp1-ileon_SF_387.d	(03/07/17 00:00:00)	Sa_FRAGILIS-M3-j7-exp1-ileon_SF_387	sfileon1	198	Sa_FRAGILIS-M3-j7-exp1-ileon_PA_387.d	(04/21/17 00:00:00)	Sa_FRAGILIS-M3-j7-exp1-ileon_PA_387	paileon1	115	Sa_FRAGILIS-M3-j7-exp1-ileon_BA_387.d	(01/24/17 00:00:00)	Sa_FRAGILIS-M3-j7-exp1-ileon_BA_387	baileon1	195	Sa_FRAGILIS-M3-j7-exp1-ileon_GCMRM_387.D	(02/17/17 00:00:00)	Sa_FRAGILIS-M3-j7-exp1-ileon_387	gcileon1	121
FRAGILIS-j3-exp1-ileon_359	Sa_FRAGILIS-M5-j3-exp1-ileon_SF_359.d	(03/07/17 00:00:00)	Sa_FRAGILIS-M5-j3-exp1-ileon_SF_359	sfileon1	200	Sa_FRAGILIS-M5-j3-exp1-ileon_PA_359.d	(04/21/17 00:00:00)	Sa_FRAGILIS-M5-j3-exp1-ileon_PA_359	paileon1	116	Sa_FRAGILIS-M5-j3-exp1-ileon_BA_359.d	(01/24/17 00:00:00)	Sa_FRAGILIS-M5-j3-exp1-ileon_BA_359	baileon1	197	Sa_FRAGILIS-M5-j3-exp1-ileon_GCMRM_359.D	(02/17/17 00:00:00)	Sa_FRAGILIS-M5-j3-exp1-ileon_359	gcileon1	123
HIRAE-j3-exp1-ileon_351	Sa_HIRAE-M3-j3-exp1-ileon_SF_351.d	(03/07/17 00:00:00)	Sa_HIRAE-M3-j3-exp1-ileon_SF_351	sfileon1	183	Sa_HIRAE-M3-j3-exp1-ileon_PA_351.d	(04/21/17 00:00:00)	Sa_HIRAE-M3-j3-exp1-ileon_PA_351	paileon1	102	Sa_HIRAE-M3-j3-exp1-ileon_BA_351b.d	(01/27/17 00:00:00)	Sa_HIRAE-M3-j3-exp1-ileon_BA_351b	baileon1	250	Sa_HIRAE-M3-j3-exp1-ileon_GCMRM_351.D	(02/17/17 00:00:00)	Sa_HIRAE-M3-j3-exp1-ileon_351	gcileon1	106
FRAGILIS-j14-exp1-ileon_412	Sa_FRAGILIS-M4-j14-exp1-ileon_SF_412.d	(03/07/17 00:00:00)	Sa_FRAGILIS-M4-j14-exp1-ileon_SF_412	sfileon1	185	-	(NA NA)	-	-	-	Sa_FRAGILIS-M4-j14-exp1-ileon_BA_412.d	(01/24/17 00:00:00)	Sa_FRAGILIS-M4-j14-exp1-ileon_BA_412	baileon1	188	Sa_FRAGILIS-M4-j14-exp1-ileon_GCMRM_412.D	(02/17/17 00:00:00)	Sa_FRAGILIS-M4-j14-exp1-ileon_412	gcileon1	108
ATB-j7-exp1-ileon_373	Sa_ATB-M1-j7-exp1-ileon_SF_373.d	(03/07/17 00:00:00)	Sa_ATB-M1-j7-exp1-ileon_SF_373	sfileon1	202	Sa_ATB-M1-j7-exp1-ileon_PA_373.d	(04/21/17 00:00:00)	Sa_ATB-M1-j7-exp1-ileon_PA_373	paileon1	118	Sa_ATB-M1-j7-exp1-ileon_BA_373.d	(01/24/17 00:00:00)	Sa_ATB-M1-j7-exp1-ileon_BA_373	baileon1	198	Sa_ATB-M1-j7-exp1-ileon_GCMRM_373.D	(02/17/17 00:00:00)	Sa_ATB-M1-j7-exp1-ileon_373	gcileon1	125
Nacl-j7-exp1-ileon_369	Sa_Nacl-M3-j7-exp1-ileon_SF_369.d	(03/07/17 00:00:00)	Sa_Nacl-M3-j7-exp1-ileon_SF_369	sfileon1	191	Sa_Nacl-M3-j7-exp1-ileon_PA_369.d	(04/21/17 00:00:00)	Sa_Nacl-M3-j7-exp1-ileon_PA_369	paileon1	109	Sa_Nacl-M3-j7-exp1-ileon_BA_369b.d	(01/24/17 00:00:00)	Sa_Nacl-M3-j7-exp1-ileon_BA_369b	baileon1	233	Sa_Nacl-M3-j7-exp1-ileon_GCMRM_369.D	(02/17/17 00:00:00)	Sa_Nacl-M3-j7-exp1-ileon_369	gcileon1	114
FRAGILIS-j3-exp1-ileon_355	Sa_FRAGILIS-M1-j3-exp1-ileon_SF_355.d	(03/07/17 00:00:00)	Sa_FRAGILIS-M1-j3-exp1-ileon_SF_355	sfileon1	203	Sa_FRAGILIS-M1-j3-exp1-ileon_PA_355.d	(04/21/17 00:00:00)	Sa_FRAGILIS-M1-j3-exp1-ileon_PA_355	paileon1	119	Sa_FRAGILIS-M1-j3-exp1-ileon_BA_355.d	(01/24/17 00:00:00)	Sa_FRAGILIS-M1-j3-exp1-ileon_BA_355	baileon1	199	Sa_FRAGILIS-M1-j3-exp1-ileon_GCMRM_355.D	(02/17/17 00:00:00)	Sa_FRAGILIS-M1-j3-exp1-ileon_355	gcileon1	126
ATB-j7-exp1-ileon_374	Sa_ATB-M2-j7-exp1-ileon_SF_374.d	(03/07/17 00:00:00)	Sa_ATB-M2-j7-exp1-ileon_SF_374	sfileon1	205	Sa_ATB-M2-j7-exp1-ileon_PA_374.d	(04/21/17 00:00:00)	Sa_ATB-M2-j7-exp1-ileon_PA_374	paileon1	121	Sa_ATB-M2-j7-exp1-ileon_BA_374.d	(01/24/17 00:00:00)	Sa_ATB-M2-j7-exp1-ileon_BA_374	baileon1	200	Sa_ATB-M2-j7-exp1-ileon_GCMRM_374.D	(02/17/17 00:00:00)	Sa_ATB-M2-j7-exp1-ileon_374	gcileon1	128
ATB-j14-exp1-ileon_401	Sa_ATB-M5-j14-exp1-ileon_SF_401.d	(03/07/17 00:00:00)	Sa_ATB-M5-j14-exp1-ileon_SF_401	sfileon1	190	Sa_ATB-M5-j14-exp1-ileon_PA_401.d	(04/21/17 00:00:00)	Sa_ATB-M5-j14-exp1-ileon_PA_401	paileon1	108	Sa_ATB-M5-j14-exp1-ileon_BA_401b.d	(01/27/17 00:00:00)	Sa_ATB-M5-j14-exp1-ileon_BA_401b	baileon1	245	Sa_ATB-M5-j14-exp1-ileon_GCMRM_401.D	(02/17/17 00:00:00)	Sa_ATB-M5-j14-exp1-ileon_401	gcileon1	113
BARNECIELA-j7-exp1-ileon_394	Sa_BARNECIELA-M4-j7-exp1-ileon_SF_394.d	(03/07/17 00:00:00)	Sa_BARNECIELA-M4-j7-exp1-ileon_SF_394	sfileon1	188	Sa_BARNECIELA-M4-j7-exp1-ileon_PA_394.d	(04/21/17 00:00:00)	Sa_BARNECIELA-M4-j7-exp1-ileon_PA_394	paileon1	106	Sa_BARNECIELA-M4-j7-exp1-ileon_BA_394b.d	(01/27/17 00:00:00)	Sa_BARNECIELA-M4-j7-exp1-ileon_BA_394b	baileon1	252	Sa_BARNECIELA-M4-j7-exp1-ileon_GCMRM_394.D	(02/17/17 00:00:00)	Sa_BARNECIELA-M4-j7-exp1-ileon_394	gcileon1	111
BARNECIELA-j3-exp1-ileon_364	Sa_BARNECIELA-M4-j3-exp1-ileon_SF_364.d	(03/07/17 00:00:00)	Sa_BARNECIELA-M4-j3-exp1-ileon_SF_364	sfileon1	207	Sa_BARNECIELA-M4-j3-exp1-ileon_PA_364.d	(04/21/17 00:00:00)	Sa_BARNECIELA-M4-j3-exp1-ileon_PA_364	paileon1	123	Sa_BARNECIELA-M4-j3-exp1-ileon_BA_364.d	(01/24/17 00:00:00)	Sa_BARNECIELA-M4-j3-exp1-ileon_BA_364	baileon1	201	Sa_BARNECIELA-M4-j3-exp1-ileon_GCMRM_364.D	(02/17/17 00:00:00)	Sa_BARNECIELA-M4-j3-exp1-ileon_364	gcileon1	130
Nacl-j7-exp1-ileon_370	Sa_Nacl-M4-j7-exp1-ileon_SF_370.d	(03/07/17 00:00:00)	Sa_Nacl-M4-j7-exp1-ileon_SF_370	sfileon1	208	Sa_Nacl-M4-j7-exp1-ileon_PA_370.d	(04/21/17 00:00:00)	Sa_Nacl-M4-j7-exp1-ileon_PA_370	paileon1	124	Sa_Nacl-M4-j7-exp1-ileon_BA_370.d	(01/24/17 00:00:00)	Sa_Nacl-M4-j7-exp1-ileon_BA_370	baileon1	202	Sa_Nacl-M4-j7-exp1-ileon_GCMRM_370.D	(02/17/17 00:00:00)	Sa_Nacl-M4-j7-exp1-ileon_370	gcileon1	131
Nacl-j3-exp1-ileon_340	Sa_Nacl-M4-j3-exp1-ileon_SF_340.d	(03/07/17 00:00:00)	Sa_Nacl-M4-j3-exp1-ileon_SF_340	sfileon1	209	Sa_Nacl-M4-j3-exp1-ileon_PA_340.d	(04/21/17 00:00:00)	Sa_Nacl-M4-j3-exp1-ileon_PA_340	paileon1	125	Sa_Nacl-M4-j3-exp1-ileon_BA_340.d	(01/24/17 00:00:00)	Sa_Nacl-M4-j3-exp1-ileon_BA_340	baileon1	203	Sa_Nacl-M4-j3-exp1-ileon_GCMRM_340.D	(02/17/17 00:00:00)	Sa_Nacl-M4-j3-exp1-ileon_340	gcileon1	132
HIRAE-j14-exp1-ileon_408	Sa_HIRAE-M6-j14-exp1-ileon_SF_408.d	(03/07/17 00:00:00)	Sa_HIRAE-M6-j14-exp1-ileon_SF_408	sfileon1	201	Sa_HIRAE-M6-j14-exp1-ileon_PA_408.d	(04/21/17 00:00:00)	Sa_HIRAE-M6-j14-exp1-ileon_PA_408	paileon1	117	Sa_HIRAE-M6-j14-exp1-ileon_BA_408b.d	(01/24/17 00:00:00)	Sa_HIRAE-M6-j14-exp1-ileon_BA_408b	baileon1	232	Sa_HIRAE-M6-j14-exp1-ileon_GCMRM_408.D	(02/17/17 00:00:00)	Sa_HIRAE-M6-j14-exp1-ileon_408	gcileon1	124
HIRAE-j7-exp1-ileon_379	Sa_HIRAE-M1-j7-exp1-ileon_SF_379.d	(03/07/17 00:00:00)	Sa_HIRAE-M1-j7-exp1-ileon_SF_379	sfileon1	193	Sa_HIRAE-M1-j7-exp1-ileon_PA_379.d	(04/21/17 00:00:00)	Sa_HIRAE-M1-j7-exp1-ileon_PA_379	paileon1	111	Sa_HIRAE-M1-j7-exp1-ileon_BA_379b.d	(01/27/17 00:00:00)	Sa_HIRAE-M1-j7-exp1-ileon_BA_379b	baileon1	258	Sa_HIRAE-M1-j7-exp1-ileon_GCMRM_379.D	(02/17/17 00:00:00)	Sa_HIRAE-M1-j7-exp1-ileon_379	gcileon1	116
FRAGILIS-j14-exp1-ileon_409	Sa_FRAGILIS-M1-j14-exp1-ileon_SF_409.d	(03/07/17 00:00:00)	Sa_FRAGILIS-M1-j14-exp1-ileon_SF_409	sfileon1	195	Sa_FRAGILIS-M1-j14-exp1-ileon_PA_409.d	(04/21/17 00:00:00)	Sa_FRAGILIS-M1-j14-exp1-ileon_PA_409	paileon1	113	Sa_FRAGILIS-M1-j14-exp1-ileon_BA_409b.d	(01/27/17 00:00:00)	Sa_FRAGILIS-M1-j14-exp1-ileon_BA_409b	baileon1	253	Sa_FRAGILIS-M1-j14-exp1-ileon_GCMRM_409.D	(02/17/17 00:00:00)	Sa_FRAGILIS-M1-j14-exp1-ileon_409	gcileon1	118
HIRAE-j7-exp1-ileon_382	Sa_HIRAE-M4-j7-exp1-ileon_SF_382.d	(03/07/17 00:00:00)	Sa_HIRAE-M4-j7-exp1-ileon_SF_382	sfileon1	212	Sa_HIRAE-M4-j7-exp1-ileon_PA_382.d	(04/21/17 00:00:00)	Sa_HIRAE-M4-j7-exp1-ileon_PA_382	paileon1	128	Sa_HIRAE-M4-j7-exp1-ileon_BA_382.d	(01/24/17 00:00:00)	Sa_HIRAE-M4-j7-exp1-ileon_BA_382	baileon1	205	Sa_HIRAE-M4-j7-exp1-ileon_GCMRM_382.D	(02/17/17 00:00:00)	Sa_HIRAE-M4-j7-exp1-ileon_382	gcileon1	135
HIRAE-j3-exp1-ileon_352	Sa_HIRAE-M4-j3-exp1-ileon_SF_352.d	(03/07/17 00:00:00)	Sa_HIRAE-M4-j3-exp1-ileon_SF_352	sfileon1	213	Sa_HIRAE-M4-j3-exp1-ileon_PA_352.d	(04/21/17 00:00:00)	Sa_HIRAE-M4-j3-exp1-ileon_PA_352	paileon1	129	Sa_HIRAE-M4-j3-exp1-ileon_BA_352.d	(01/24/17 00:00:00)	Sa_HIRAE-M4-j3-exp1-ileon_BA_352	baileon1	206	Sa_HIRAE-M4-j3-exp1-ileon_GCMRM_352.D	(02/17/17 00:00:00)	Sa_HIRAE-M4-j3-exp1-ileon_352	gcileon1	136
FRAGILIS-j14-exp1-ileon_411	Sa_FRAGILIS-M3-j14-exp1-ileon_SF_411.d	(03/07/17 00:00:00)	Sa_FRAGILIS-M3-j14-exp1-ileon_SF_411	sfileon1	178	-	(NA NA)	-	-	-	Sa_FRAGILIS-M3-j14-exp1-ileon_BA_411b.d	(01/24/17 00:00:00)	Sa_FRAGILIS-M3-j14-exp1-ileon_BA_411b	baileon1	235	Sa_FRAGILIS-M3-j14-exp1-ileon_GCMRM_411.D	(02/17/17 00:00:00)	Sa_FRAGILIS-M3-j14-exp1-ileon_411	gcileon1	101
BARNECIELA-j3-exp1-ileon_365	Sa_BARNECIELA-M5-j3-exp1-ileon_SF_365.d	(03/07/17 00:00:00)	Sa_BARNECIELA-M5-j3-exp1-ileon_SF_365	sfileon1	214	Sa_BARNECIELA-M5-j3-exp1-ileon_PA_365.d	(04/21/17 00:00:00)	Sa_BARNECIELA-M5-j3-exp1-ileon_PA_365	paileon1	130	Sa_BARNECIELA-M5-j3-exp1-ileon_BA_365.d	(01/24/17 00:00:00)	Sa_BARNECIELA-M5-j3-exp1-ileon_BA_365	baileon1	207	Sa_BARNECIELA-M5-j3-exp1-ileon_GCMRM_365.D	(02/17/17 00:00:00)	Sa_BARNECIELA-M5-j3-exp1-ileon_365	gcileon1	137
Nacl-j3-exp1-ileon_338	Sa_Nacl-M2-j3-exp1-ileon_SF_338.d	(03/07/17 00:00:00)	Sa_Nacl-M2-j3-exp1-ileon_SF_338	sfileon1	199	-	(NA NA)	-	-	-	Sa_Nacl-M2-j3-exp1-ileon_BA_338.d	(01/24/17 00:00:00)	Sa_Nacl-M2-j3-exp1-ileon_BA_338	baileon1	196	Sa_Nacl-M2-j3-exp1-ileon_GCMRM_338.D	(02/17/17 00:00:00)	Sa_Nacl-M2-j3-exp1-ileon_338	gcileon1	122
ATB-j14-exp1-ileon_399	Sa_ATB-M3-j14-exp1-ileon_SF_399.d	(03/07/17 00:00:00)	Sa_ATB-M3-j14-exp1-ileon_SF_399	sfileon1	204	Sa_ATB-M3-j14-exp1-ileon_PA_399.d	(04/21/17 00:00:00)	Sa_ATB-M3-j14-exp1-ileon_PA_399	paileon1	120	Sa_ATB-M3-j14-exp1-ileon_BA_399b.d	(01/27/17 00:00:00)	Sa_ATB-M3-j14-exp1-ileon_BA_399b	baileon1	239	Sa_ATB-M3-j14-exp1-ileon_GCMRM_399.D	(02/17/17 00:00:00)	Sa_ATB-M3-j14-exp1-ileon_399	gcileon1	127
HIRAE-j3-exp1-ileon_349	Sa_HIRAE-M1-j3-exp1-ileon_SF_349.d	(03/07/17 00:00:00)	Sa_HIRAE-M1-j3-exp1-ileon_SF_349	sfileon1	215	Sa_HIRAE-M1-j3-exp1-ileon_PA_349.d	(04/21/17 00:00:00)	Sa_HIRAE-M1-j3-exp1-ileon_PA_349	paileon1	131	Sa_HIRAE-M1-j3-exp1-ileon_BA_349.d	(01/24/17 00:00:00)	Sa_HIRAE-M1-j3-exp1-ileon_BA_349	baileon1	208	Sa_HIRAE-M1-j3-exp1-ileon_GCMRM_349.D	(02/17/17 00:00:00)	Sa_HIRAE-M1-j3-exp1-ileon_349	gcileon1	138
BARNECIELA-j14-exp1-ileon_419	Sa_BARNECIELA-M5-j14-exp1-ileon_SF_419.d	(03/07/17 00:00:00)	Sa_BARNECIELA-M5-j14-exp1-ileon_SF_419	sfileon1	218	Sa_BARNECIELA-M5-j14-exp1-ileon_PA_419.d	(04/21/17 00:00:00)	Sa_BARNECIELA-M5-j14-exp1-ileon_PA_419	paileon1	134	Sa_BARNECIELA-M5-j14-exp1-ileon_BA_419.d	(01/24/17 00:00:00)	Sa_BARNECIELA-M5-j14-exp1-ileon_BA_419	baileon1	209	Sa_BARNECIELA-M5-j14-exp1-ileon_GCMRM_419.D	(02/17/17 00:00:00)	Sa_BARNECIELA-M5-j14-exp1-ileon_419	gcileon1	141
BARNECIELA-j7-exp1-ileon_395	Sa_BARNECIELA-M5-j7-exp1-ileon_SF_395.d	(03/07/17 00:00:00)	Sa_BARNECIELA-M5-j7-exp1-ileon_SF_395	sfileon1	211	Sa_BARNECIELA-M5-j7-exp1-ileon_PA_395.d	(04/21/17 00:00:00)	Sa_BARNECIELA-M5-j7-exp1-ileon_PA_395	paileon1	127	Sa_BARNECIELA-M5-j7-exp1-ileon_BA_395b.d	(01/24/17 00:00:00)	Sa_BARNECIELA-M5-j7-exp1-ileon_BA_395b	baileon1	236	Sa_BARNECIELA-M5-j7-exp1-ileon_GCMRM_395.D	(02/17/17 00:00:00)	Sa_BARNECIELA-M5-j7-exp1-ileon_395	gcileon1	134
BARNECIELA-j7-exp1-ileon_391	Sa_ARNECIELA-M1-j7-exp1-ileon_SF_391.d	(03/07/17 00:00:00)	Sa_ARNECIELA-M1-j7-exp1-ileon_SF_391	sfileon1	206	Sa_BARNECIELA-M1-j7-exp1-ileon_PA_391.d	(04/21/17 00:00:00)	Sa_BARNECIELA-M1-j7-exp1-ileon_PA_391	paileon1	122	Sa_ARNECIELA-M1-j7-exp1-ileon_BA_391b.d	(01/27/17 00:00:00)	Sa_ARNECIELA-M1-j7-exp1-ileon_BA_391b	baileon1	257	Sa_ARNECIELA-M1-j7-exp1-ileon_GCMRM_391.D	(02/17/17 00:00:00)	Sa_ARNECIELA-M1-j7-exp1-ileon_391	gcileon1	129
BARNECIELA-j14-exp1-ileon_416	Sa_BARNECIELA-M2-j14-exp1-ileon_SF_416.d	(03/07/17 00:00:00)	Sa_BARNECIELA-M2-j14-exp1-ileon_SF_416	sfileon1	217	Sa_BARNECIELA-M2-j14-exp1-ileon_PA_416.d	(04/21/17 00:00:00)	Sa_BARNECIELA-M2-j14-exp1-ileon_PA_416	paileon1	133	Sa_BARNECIELA-M2-j14-exp1-ileon_BA_416b.d	(01/24/17 00:00:00)	Sa_BARNECIELA-M2-j14-exp1-ileon_BA_416b	baileon1	231	Sa_BARNECIELA-M2-j14-exp1-ileon_GCMRM_416.D	(02/17/17 00:00:00)	Sa_BARNECIELA-M2-j14-exp1-ileon_416	gcileon1	140
ATB-j7-exp1-ileon_376	Sa_ATB-M4-j7-exp1-ileon_SF_376.d	(03/10/17 00:00:00)	Sa_ATB-M4-j7-exp1-ileon_SF_376	sfileon1	224	Sa_ATB-M4-j7-exp1-ileon_PA_376.d	(04/21/17 00:00:00)	Sa_ATB-M4-j7-exp1-ileon_PA_376	paileon1	140	Sa_ATB-M4-j7-exp1-ileon_BA_376.d	(01/24/17 00:00:00)	Sa_ATB-M4-j7-exp1-ileon_BA_376	baileon1	211	Sa_ATB-M4-j7-exp1-ileon_GCMRM_376.D	(02/17/17 00:00:00)	Sa_ATB-M4-j7-exp1-ileon_376	gcileon1	147
HIRAE-j14-exp1-ileon_405	Sa_HIRAE-M3-j14-exp1-ileon_SF_405.d	(03/07/17 00:00:00)	Sa_HIRAE-M3-j14-exp1-ileon_SF_405	sfileon1	216	Sa_HIRAE-M3-j14-exp1-ileon_PA_405.d	(04/21/17 00:00:00)	Sa_HIRAE-M3-j14-exp1-ileon_PA_405	paileon1	132	Sa_HIRAE-M3-j14-exp1-ileon_BA_405b.d	(01/24/17 00:00:00)	Sa_HIRAE-M3-j14-exp1-ileon_BA_405b	baileon1	237	Sa_HIRAE-M3-j14-exp1-ileon_GCMRM_405.D	(02/17/17 00:00:00)	Sa_HIRAE-M3-j14-exp1-ileon_405	gcileon1	139
FRAGILIS-j14-exp1-ileon_414	Sa_FRAGILIS-M6-j14-exp1-ileon_SF_414.d	(03/07/17 00:00:00)	Sa_FRAGILIS-M6-j14-exp1-ileon_SF_414	sfileon1	196	-	(NA NA)	-	-	-	Sa_FRAGILIS-M6-j14-exp1-ileon_BA_414b.d	(01/24/17 00:00:00)	Sa_FRAGILIS-M6-j14-exp1-ileon_BA_414b	baileon1	230	Sa_FRAGILIS-M6-j14-exp1-ileon_GCMRM_414.D	(02/17/17 00:00:00)	Sa_FRAGILIS-M6-j14-exp1-ileon_414	gcileon1	119
ATB-j3-exp1-ileon_346	Sa_ATB-M4-j3-exp1-ileon_SF_346.d	(03/07/17 00:00:00)	Sa_ATB-M4-j3-exp1-ileon_SF_346	sfileon1	220	Sa_ATB-M4-j3-exp1-ileon_PA_346.d	(04/21/17 00:00:00)	Sa_ATB-M4-j3-exp1-ileon_PA_346	paileon1	136	Sa_ATB-M4-j3-exp1-ileon_BA_346b.d	(01/24/17 00:00:00)	Sa_ATB-M4-j3-exp1-ileon_BA_346b	baileon1	229	Sa_ATB-M4-j3-exp1-ileon_GCMRM_346.D	(02/17/17 00:00:00)	Sa_ATB-M4-j3-exp1-ileon_346	gcileon1	143
Nacl-j3-exp1-ileon_342	Sa_Nacl-M6-j3-exp1-ileon_SF_342.d	(03/10/17 00:00:00)	Sa_Nacl-M6-j3-exp1-ileon_SF_342	sfileon1	226	Sa_Nacl-M6-j3-exp1-ileon_PA_342.d	(04/21/17 00:00:00)	Sa_Nacl-M6-j3-exp1-ileon_PA_342	paileon1	142	Sa_Nacl-M6-j3-exp1-ileon_BA_342.d	(01/24/17 00:00:00)	Sa_Nacl-M6-j3-exp1-ileon_BA_342	baileon1	212	Sa_Nacl-M6-j3-exp1-ileon_GCMRM_342.D	(02/17/17 00:00:00)	Sa_Nacl-M6-j3-exp1-ileon_342	gcileon1	149
HIRAE-j14-exp1-ileon_404	Sa_HIRAE-M2-j14-exp1-ileon_SF_404.d	(03/10/17 00:00:00)	Sa_HIRAE-M2-j14-exp1-ileon_SF_404	sfileon1	227	Sa_HIRAE-M2-j14-exp1-ileon_PA_404.d	(04/21/17 00:00:00)	Sa_HIRAE-M2-j14-exp1-ileon_PA_404	paileon1	143	Sa_HIRAE-M2-j14-exp1-ileon_BA_404.d	(01/24/17 00:00:00)	Sa_HIRAE-M2-j14-exp1-ileon_BA_404	baileon1	213	Sa_HIRAE-M2-j14-exp1-ileon_GCMRM_404.D	(02/17/17 00:00:00)	Sa_HIRAE-M2-j14-exp1-ileon_404	gcileon1	150
ATB-j3-exp1-ileon_344	Sa_ATB-M2-j3-exp1-ileon_SF_344.d	(03/10/17 00:00:00)	Sa_ATB-M2-j3-exp1-ileon_SF_344	sfileon1	228	Sa_ATB-M2-j3-exp1-ileon_PA_344.d	(04/21/17 00:00:00)	Sa_ATB-M2-j3-exp1-ileon_PA_344	paileon1	144	Sa_ATB-M2-j3-exp1-ileon_BA_344.d	(01/24/17 00:00:00)	Sa_ATB-M2-j3-exp1-ileon_BA_344	baileon1	214	Sa_ATB-M2-j3-exp1-ileon_GCMRM_344.D	(02/17/17 00:00:00)	Sa_ATB-M2-j3-exp1-ileon_344	gcileon1	151
HIRAE-j7-exp1-ileon_380	Sa_HIRAE-M2-j7-exp1-ileon_SF_380.d	(03/10/17 00:00:00)	Sa_HIRAE-M2-j7-exp1-ileon_SF_380	sfileon1	229	Sa_HIRAE-M2-j7-exp1-ileon_PA_380.d	(04/21/17 00:00:00)	Sa_HIRAE-M2-j7-exp1-ileon_PA_380	paileon1	145	Sa_HIRAE-M2-j7-exp1-ileon_BA_380.d	(01/24/17 00:00:00)	Sa_HIRAE-M2-j7-exp1-ileon_BA_380	baileon1	215	Sa_HIRAE-M2-j7-exp1-ileon_GCMRM_380.D	(02/17/17 00:00:00)	Sa_HIRAE-M2-j7-exp1-ileon_380	gcileon1	152
FRAGILIS-j14-exp1-ileon_413	Sa_FRAGILIS-M5-j14-exp1-ileon_SF_413.d	(03/10/17 00:00:00)	Sa_FRAGILIS-M5-j14-exp1-ileon_SF_413	sfileon1	222	Sa_FRAGILIS-M5-j14-exp1-ileon_PA_413.d	(04/21/17 00:00:00)	Sa_FRAGILIS-M5-j14-exp1-ileon_PA_413	paileon1	138	Sa_FRAGILIS-M5-j14-exp1-ileon_BA_413b.d	(01/27/17 00:00:00)	Sa_FRAGILIS-M5-j14-exp1-ileon_BA_413b	baileon1	243	Sa_FRAGILIS-M5-j14-exp1-ileon_GCMRM_413.D	(02/17/17 00:00:00)	Sa_FRAGILIS-M5-j14-exp1-ileon_413	gcileon1	145
HIRAE-j3-exp1-ileon_350	Sa_HIRAE-M2-j3-exp1-ileon_SF_350.d	(03/07/17 00:00:00)	Sa_HIRAE-M2-j3-exp1-ileon_SF_350	sfileon1	221	Sa_HIRAE-M2-j3-exp1-ileon_PA_350.d	(04/21/17 00:00:00)	Sa_HIRAE-M2-j3-exp1-ileon_PA_350	paileon1	137	Sa_HIRAE-M2-j3-exp1-ileon_BA_350b.d	(01/27/17 00:00:00)	Sa_HIRAE-M2-j3-exp1-ileon_BA_350b	baileon1	247	Sa_HIRAE-M2-j3-exp1-ileon_GCMRM_350.D	(02/17/17 00:00:00)	Sa_HIRAE-M2-j3-exp1-ileon_350	gcileon1	144
Nacl-j7-exp1-ileon_372	Sa_Nacl-M6-j7-exp1-ileon_SF_372.d	(03/10/17 00:00:00)	Sa_Nacl-M6-j7-exp1-ileon_SF_372	sfileon1	232	Sa_Nacl-M6-j7-exp1-ileon_PA_372.d	(04/21/17 00:00:00)	Sa_Nacl-M6-j7-exp1-ileon_PA_372	paileon1	148	Sa_Nacl-M6-j7-exp1-ileon_BA_372.d	(01/24/17 00:00:00)	Sa_Nacl-M6-j7-exp1-ileon_BA_372	baileon1	216	Sa_Nacl-M6-j7-exp1-ileon_GCMRM_372.D	(02/17/17 00:00:00)	Sa_Nacl-M6-j7-exp1-ileon_372	gcileon1	155
FRAGILIS-j7-exp1-ileon_386	Sa_FRAGILIS-M2-j7-exp1-ileon_SF_386.d	(03/07/17 00:00:00)	Sa_FRAGILIS-M2-j7-exp1-ileon_SF_386	sfileon1	219	Sa_FRAGILIS-M2-j7-exp1-ileon_PA_386.d	(04/21/17 00:00:00)	Sa_FRAGILIS-M2-j7-exp1-ileon_PA_386	paileon1	135	Sa_FRAGILIS-M2-j7-exp1-ileon_BA_386b.d	(01/27/17 00:00:00)	Sa_FRAGILIS-M2-j7-exp1-ileon_BA_386b	baileon1	256	Sa_FRAGILIS-M2-j7-exp1-ileon_GCMRM_386.D	(02/17/17 00:00:00)	Sa_FRAGILIS-M2-j7-exp1-ileon_386	gcileon1	142
FRAGILIS-j3-exp1-ileon_360	Sa_FRAGILIS-M6-j3-exp1-ileon_SF_360.d	(03/10/17 00:00:00)	Sa_FRAGILIS-M6-j3-exp1-ileon_SF_360	sfileon1	233	Sa_FRAGILIS-M6-j3-exp1-ileon_PA_360.d	(04/21/17 00:00:00)	Sa_FRAGILIS-M6-j3-exp1-ileon_PA_360	paileon1	149	Sa_FRAGILIS-M6-j3-exp1-ileon_BA_360.d	(01/24/17 00:00:00)	Sa_FRAGILIS-M6-j3-exp1-ileon_BA_360	baileon1	217	Sa_FRAGILIS-M6-j3-exp1-ileon_GCMRM_360.D	(02/17/17 00:00:00)	Sa_FRAGILIS-M6-j3-exp1-ileon_360	gcileon1	156
ATB-j14-exp1-ileon_402	Sa_ATB-M6-j14-exp1-ileon_SF_402.d	(03/10/17 00:00:00)	Sa_ATB-M6-j14-exp1-ileon_SF_402	sfileon1	234	Sa_ATB-M6-j14-exp1-ileon_PA_402.d	(04/21/17 00:00:00)	Sa_ATB-M6-j14-exp1-ileon_PA_402	paileon1	150	Sa_ATB-M6-j14-exp1-ileon_BA_402.d	(01/24/17 00:00:00)	Sa_ATB-M6-j14-exp1-ileon_BA_402	baileon1	218	Sa_ATB-M6-j14-exp1-ileon_GCMRM_402.D	(02/17/17 00:00:00)	Sa_ATB-M6-j14-exp1-ileon_402	gcileon1	157
ATB-j14-exp1-ileon_397	Sa_ATB-M1-j14-exp1-ileon_SF_397.d	(03/10/17 00:00:00)	Sa_ATB-M1-j14-exp1-ileon_SF_397	sfileon1	225	Sa_ATB-M1-j14-exp1-ileon_PA_397.d	(04/21/17 00:00:00)	Sa_ATB-M1-j14-exp1-ileon_PA_397	paileon1	141	Sa_ATB-M1-j14-exp1-ileon_BA_397b.d	(01/27/17 00:00:00)	Sa_ATB-M1-j14-exp1-ileon_BA_397b	baileon1	249	Sa_ATB-M1-j14-exp1-ileon_GCMRM_397.D	(02/17/17 00:00:00)	Sa_ATB-M1-j14-exp1-ileon_397	gcileon1	148
BARNECIELA-j3-exp1-ileon_366	Sa_BARNECIELA-M6-j3-exp1-ileon_SF_366.d	(03/10/17 00:00:00)	Sa_BARNECIELA-M6-j3-exp1-ileon_SF_366	sfileon1	237	Sa_BARNECIELA-M6-j3-exp1-ileon_PA_366.d	(04/21/17 00:00:00)	Sa_BARNECIELA-M6-j3-exp1-ileon_PA_366	paileon1	153	Sa_BARNECIELA-M6-j3-exp1-ileon_BA_366.d	(01/24/17 00:00:00)	Sa_BARNECIELA-M6-j3-exp1-ileon_BA_366	baileon1	220	Sa_BARNECIELA-M6-j3-exp1-ileon_GCMRM_366.D	(02/17/17 00:00:00)	Sa_BARNECIELA-M6-j3-exp1-ileon_366	gcileon1	160
HIRAE-j3-exp1-ileon_354	Sa_HIRAE-M6-j3-exp1-ileon_SF_354.d	(03/10/17 00:00:00)	Sa_HIRAE-M6-j3-exp1-ileon_SF_354	sfileon1	239	Sa_HIRAE-M6-j3-exp1-ileon_PA_354.d	(04/21/17 00:00:00)	Sa_HIRAE-M6-j3-exp1-ileon_PA_354	paileon1	155	Sa_HIRAE-M6-j3-exp1-ileon_BA_354.d	(01/24/17 00:00:00)	Sa_HIRAE-M6-j3-exp1-ileon_BA_354	baileon1	221	Sa_HIRAE-M6-j3-exp1-ileon_GCMRM_354.D	(02/17/17 00:00:00)	Sa_HIRAE-M6-j3-exp1-ileon_354	gcileon1	162
FRAGILIS-j3-exp1-ileon_356	Sa_FRAGILIS-M2-j3-exp1-ileon_SF_356.d	(03/10/17 00:00:00)	Sa_FRAGILIS-M2-j3-exp1-ileon_SF_356	sfileon1	230	Sa_FRAGILIS-M2-j3-exp1-ileon_PA_356.d	(04/21/17 00:00:00)	Sa_FRAGILIS-M2-j3-exp1-ileon_PA_356	paileon1	146	Sa_FRAGILIS-M2-j3-exp1-ileon_BA_356b.d	(01/27/17 00:00:00)	Sa_FRAGILIS-M2-j3-exp1-ileon_BA_356b	baileon1	251	Sa_FRAGILIS-M2-j3-exp1-ileon_GCMRM_356.D	(02/17/17 00:00:00)	Sa_FRAGILIS-M2-j3-exp1-ileon_356	gcileon1	153
BARNECIELA-j7-exp1-ileon_392	Sa_BARNECIELA-M2-j7-exp1-ileon_SF_392.d	(03/10/17 00:00:00)	Sa_BARNECIELA-M2-j7-exp1-ileon_SF_392	sfileon1	231	Sa_BARNECIELA-M2-j7-exp1-ileon_PA_392.d	(04/21/17 00:00:00)	Sa_BARNECIELA-M2-j7-exp1-ileon_PA_392	paileon1	147	Sa_BARNECIELA-M2-j7-exp1-ileon_BA_392b.d	(01/27/17 00:00:00)	Sa_BARNECIELA-M2-j7-exp1-ileon_BA_392b	baileon1	248	Sa_BARNECIELA-M2-j7-exp1-ileon_GCMRM_392.D	(02/17/17 00:00:00)	Sa_BARNECIELA-M2-j7-exp1-ileon_392	gcileon1	154
BARNECIELA-j3-exp1-ileon_362	Sa_BARNECIELA-M2-j3-exp1-ileon_SF_362.d	(03/10/17 00:00:00)	Sa_BARNECIELA-M2-j3-exp1-ileon_SF_362	sfileon1	241	Sa_BARNECIELA-M2-j3-exp1-ileon_PA_362.d	(04/21/17 00:00:00)	Sa_BARNECIELA-M2-j3-exp1-ileon_PA_362	paileon1	157	Sa_BARNECIELA-M2-j3-exp1-ileon_BA_362.d	(01/24/17 00:00:00)	Sa_BARNECIELA-M2-j3-exp1-ileon_BA_362	baileon1	222	Sa_BARNECIELA-M2-j3-exp1-ileon_GCMRM_362.D	(02/17/17 00:00:00)	Sa_BARNECIELA-M2-j3-exp1-ileon_362	gcileon1	164
BARNECIELA-j14-exp1-ileon_417	Sa_BARNECIELA-M3-j14-exp1-ileon_SF_417.d	(03/10/17 00:00:00)	Sa_BARNECIELA-M3-j14-exp1-ileon_SF_417	sfileon1	236	Sa_BARNECIELA-M3-j14-exp1-ileon_PA_417.d	(04/21/17 00:00:00)	Sa_BARNECIELA-M3-j14-exp1-ileon_PA_417	paileon1	152	Sa_BARNECIELA-M3-j14-exp1-ileon_BA_417b.d	(01/27/17 00:00:00)	Sa_BARNECIELA-M3-j14-exp1-ileon_BA_417b	baileon1	241	Sa_BARNECIELA-M3-j14-exp1-ileon_GCMRM_417.D	(02/17/17 00:00:00)	Sa_BARNECIELA-M3-j14-exp1-ileon_417	gcileon1	159
FRAGILIS-j7-exp1-ileon_388	Sa_FRAGILIS-M4-j7-exp1-ileon_SF_388.d	(03/10/17 00:00:00)	Sa_FRAGILIS-M4-j7-exp1-ileon_SF_388	sfileon1	242	Sa_FRAGILIS-M4-j7-exp1-ileon_PA_388.d	(04/21/17 00:00:00)	Sa_FRAGILIS-M4-j7-exp1-ileon_PA_388	paileon1	158	Sa_FRAGILIS-M4-j7-exp1-ileon_BA_388.d	(01/24/17 00:00:00)	Sa_FRAGILIS-M4-j7-exp1-ileon_BA_388	baileon1	223	Sa_FRAGILIS-M4-j7-exp1-ileon_GCMRM_388.D	(02/17/17 00:00:00)	Sa_FRAGILIS-M4-j7-exp1-ileon_388	gcileon1	165
BARNECIELA-j7-exp1-ileon_396	Sa_BARNECIELA-M6-j7-exp1-ileon_SF_396.d	(03/10/17 00:00:00)	Sa_BARNECIELA-M6-j7-exp1-ileon_SF_396	sfileon1	243	Sa_BARNECIELA-M6-j7-exp1-ileon_PA_396.d	(04/21/17 00:00:00)	Sa_BARNECIELA-M6-j7-exp1-ileon_PA_396	paileon1	159	Sa_BARNECIELA-M6-j7-exp1-ileon_BA_396.d	(01/24/17 00:00:00)	Sa_BARNECIELA-M6-j7-exp1-ileon_BA_396	baileon1	224	Sa_BARNECIELA-M6-j7-exp1-ileon_GCMRM_396.D	(02/17/17 00:00:00)	Sa_BARNECIELA-M6-j7-exp1-ileon_396	gcileon1	166
HIRAE-j7-exp1-ileon_384	Sa_HIRAE-M6-j7-exp1-ileon_SF_384.d	(03/10/17 00:00:00)	Sa_HIRAE-M6-j7-exp1-ileon_SF_384	sfileon1	238	Sa_HIRAE-M6-j7-exp1-ileon_PA_384.d	(04/21/17 00:00:00)	Sa_HIRAE-M6-j7-exp1-ileon_PA_384	paileon1	154	Sa_HIRAE-M6-j7-exp1-ileon_BA_384b.d	(01/27/17 00:00:00)	Sa_HIRAE-M6-j7-exp1-ileon_BA_384b	baileon1	242	Sa_HIRAE-M6-j7-exp1-ileon_GCMRM_384.D	(02/17/17 00:00:00)	Sa_HIRAE-M6-j7-exp1-ileon_384	gcileon1	161
Nacl-j7-exp1-ileon_368	Sa_Nacl-M2-j7-exp1-ileon_SF_368.d	(03/10/17 00:00:00)	Sa_Nacl-M2-j7-exp1-ileon_SF_368	sfileon1	244	Sa_Nacl-M2-j7-exp1-ileon_PA_368.d	(04/21/17 00:00:00)	Sa_Nacl-M2-j7-exp1-ileon_PA_368	paileon1	160	Sa_Nacl-M2-j7-exp1-ileon_BA_368.d	(01/24/17 00:00:00)	Sa_Nacl-M2-j7-exp1-ileon_BA_368	baileon1	225	Sa_Nacl-M2-j7-exp1-ileon_GCMRM_368.D	(02/17/17 00:00:00)	Sa_Nacl-M2-j7-exp1-ileon_368	gcileon1	167
FRAGILIS-j14-exp1-ileon_410	Sa_FRAGILIS-M2-j14-exp1-ileon_SF_410.d	(03/10/17 00:00:00)	Sa_FRAGILIS-M2-j14-exp1-ileon_SF_410	sfileon1	240	Sa_FRAGILIS-M2-j14-exp1-ileon_PA_410.d	(04/21/17 00:00:00)	Sa_FRAGILIS-M2-j14-exp1-ileon_PA_410	paileon1	156	Sa_FRAGILIS-M2-j14-exp1-ileon_BA_410b.d	(01/27/17 00:00:00)	Sa_FRAGILIS-M2-j14-exp1-ileon_BA_410b	baileon1	240	Sa_FRAGILIS-M2-j14-exp1-ileon_GCMRM_410.D	(02/17/17 00:00:00)	Sa_FRAGILIS-M2-j14-exp1-ileon_410	gcileon1	163
HIRAE-j14-exp1-ileon_406	Sa_HIRAE-M4-j14-exp1-ileon_SF_406.d	(03/10/17 00:00:00)	Sa_HIRAE-M4-j14-exp1-ileon_SF_406	sfileon1	247	Sa_HIRAE-M4-j14-exp1-ileon_PA_406.d	(04/21/17 00:00:00)	Sa_HIRAE-M4-j14-exp1-ileon_PA_406	paileon1	163	Sa_HIRAE-M4-j14-exp1-ileon_BA_406.d	(01/24/17 00:00:00)	Sa_HIRAE-M4-j14-exp1-ileon_BA_406	baileon1	226	Sa_HIRAE-M4-j14-exp1-ileon_GCMRM_406.D	(02/17/17 00:00:00)	Sa_HIRAE-M4-j14-exp1-ileon_406	gcileon1	170
ATB-j3-exp1-ileon_348	Sa_ATB-M6-j3-exp1-ileon_SF_348.d	(03/10/17 00:00:00)	Sa_ATB-M6-j3-exp1-ileon_SF_348	sfileon1	246	Sa_ATB-M6-j3-exp1-ileon_PA_348.d	(04/21/17 00:00:00)	Sa_ATB-M6-j3-exp1-ileon_PA_348	paileon1	162	Sa_ATB-M6-j3-exp1-ileon_BA_348b.d	(01/24/17 00:00:00)	Sa_ATB-M6-j3-exp1-ileon_BA_348b	baileon1	234	Sa_ATB-M6-j3-exp1-ileon_GCMRM_348.D	(02/17/17 00:00:00)	Sa_ATB-M6-j3-exp1-ileon_348	gcileon1	169
BARNECIELA-j14-exp1-ileon_418	Sa_BARNECIELA-M4-j14-exp1-ileon_SF_418.d	(03/10/17 00:00:00)	Sa_BARNECIELA-M4-j14-exp1-ileon_SF_418	sfileon1	245	Sa_BARNECIELA-M4-j14-exp1-ileon_PA_418.d	(04/21/17 00:00:00)	Sa_BARNECIELA-M4-j14-exp1-ileon_PA_418	paileon1	161	Sa_BARNECIELA-M4-j14-exp1-ileon_BA_418b.d	(01/27/17 00:00:00)	Sa_BARNECIELA-M4-j14-exp1-ileon_BA_418b	baileon1	246	Sa_BARNECIELA-M4-j14-exp1-ileon_GCMRM_418.D	(02/17/17 00:00:00)	Sa_BARNECIELA-M4-j14-exp1-ileon_418	gcileon1	168
St_SCFA-exp3-ileon_pre	St_SCFA-exp3-ileon_SF_2a.d	(02/26/17 00:00:00)	St_SCFA-exp3-ileon_SF_2a	sfileon3	1	-	(NA NA)	-	-	-	-	(NA NA)	-	-	-	-	(NA NA)	-	-	-
St_PA-exp2-ileon_pre.paileon2	-	(NA NA)	-	-	-	St_PA-exp2-ileon_PA_2a.d	(04/18/17 00:00:00)	St_PA-exp2-ileon_PA_2a	paileon2	1	-	(NA NA)	-	-	-	-	(NA NA)	-	-	-
St_BA1-exp3-ileon_pre	-	(NA NA)	-	-	-	-	(NA NA)	-	-	-	St_BA1-exp3-ileon_BA_2a.d	(01/18/17 00:00:00)	St_BA1-exp3-ileon_BA_2a	baileon3	1	-	(NA NA)	-	-	-
St_AA_exp3-ileon_pre	-	(NA NA)	-	-	-	-	(NA NA)	-	-	-	-	(NA NA)	-	-	-	St_AA_exp3-ileon_GCMRM_3a.D	(02/11/17 00:00:00)	St_AA_exp3-ileon_3a	gcileon3	1
St_BA2-exp3-ileon_pre	-	(NA NA)	-	-	-	-	(NA NA)	-	-	-	St_BA2-exp3-ileon_BA_3a.d	(01/18/17 00:00:00)	St_BA2-exp3-ileon_BA_3a	baileon3	2	-	(NA NA)	-	-	-
St_PA-exp2-ileon_post	-	(NA NA)	-	-	-	St_PA-exp2-ileon_PA_2c.d	(04/21/17 00:00:00)	St_PA-exp2-ileon_PA_2c	paileon2	75	-	(NA NA)	-	-	-	-	(NA NA)	-	-	-
St_PA-exp2-ileon_pre.paileon1	-	(NA NA)	-	-	-	St_PA-exp2-ileon_PA_2a.d	(04/21/17 00:00:00)	St_PA-exp2-ileon_PA_2a	paileon1	76	-	(NA NA)	-	-	-	-	(NA NA)	-	-	-
St_SCFA-exp3-ileon_post	St_SCFA-exp3-ileon_SF_2c.d	(03/01/17 00:00:00)	St_SCFA-exp3-ileon_SF_2c	sfileon3	78	-	(NA NA)	-	-	-	-	(NA NA)	-	-	-	-	(NA NA)	-	-	-
St_AA_exp3-ileon_post	-	(NA NA)	-	-	-	-	(NA NA)	-	-	-	-	(NA NA)	-	-	-	St_AA_exp3-ileon_GCMRM_3b.D	(02/11/17 00:00:00)	St_AA_exp3-ileon_3b	gcileon3	78
St_SCFA-exp2-ileon_pre	St_SCFA-exp2-ileon_SF_2a.d	(03/01/17 00:00:00)	St_SCFA-exp2-ileon_SF_2a	sfileon2	79	-	(NA NA)	-	-	-	-	(NA NA)	-	-	-	-	(NA NA)	-	-	-
St_AA-exp1-ileon_pre	-	(NA NA)	-	-	-	-	(NA NA)	-	-	-	-	(NA NA)	-	-	-	St_AA-exp1-ileon_GCMRM_3a.D	(02/14/17 00:00:00)	St_AA-exp1-ileon_3a	gcileon1	79
St_BA2-exp3-ileon_post	-	(NA NA)	-	-	-	-	(NA NA)	-	-	-	St_BA2-exp3-ileon_BA_3b.d	(01/21/17 00:00:00)	St_BA2-exp3-ileon_BA_3b	baileon3	80	-	(NA NA)	-	-	-
St_BA1-exp3-ileon_post	-	(NA NA)	-	-	-	-	(NA NA)	-	-	-	St_BA1-exp3-ileon_BA_2b.d	(01/21/17 00:00:00)	St_BA1-exp3-ileon_BA_2b	baileon3	81	-	(NA NA)	-	-	-
St_BA1-exp2-ileon_pre	-	(NA NA)	-	-	-	-	(NA NA)	-	-	-	St_BA1-exp2-ileon_BA_2a.d	(01/21/17 00:00:00)	St_BA1-exp2-ileon_BA_2a	baileon2	82	-	(NA NA)	-	-	-
St_BA2-exp2-ileon_pre	-	(NA NA)	-	-	-	-	(NA NA)	-	-	-	St_BA2-exp2-ileon_BA_3a.d	(01/21/17 00:00:00)	St_BA2-exp2-ileon_BA_3a	baileon2	83	-	(NA NA)	-	-	-
St_SCFA-exp2-ileon_post	St_SCFA-exp2-ileon_SF_2c.d	(03/04/17 00:00:00)	St_SCFA-exp2-ileon_SF_2c	sfileon2	154	-	(NA NA)	-	-	-	-	(NA NA)	-	-	-	-	(NA NA)	-	-	-
St_SCFA1-exp1-ileon_pre	St_SCFA1-exp1-ileon_SF_3a.d	(03/07/17 00:00:00)	St_SCFA1-exp1-ileon_SF_3a	sfileon1	155	-	(NA NA)	-	-	-	-	(NA NA)	-	-	-	-	(NA NA)	-	-	-
St_BA2-exp2-ileon_post	-	(NA NA)	-	-	-	-	(NA NA)	-	-	-	St_BA2-exp2-ileon_BA_3b.d	(01/21/17 00:00:00)	St_BA2-exp2-ileon_BA_3b	baileon2	160	-	(NA NA)	-	-	-
St_BA1-exp2-ileon_post	-	(NA NA)	-	-	-	-	(NA NA)	-	-	-	St_BA1-exp2-ileon_BA_2b.d	(01/21/17 00:00:00)	St_BA1-exp2-ileon_BA_2b	baileon2	161	-	(NA NA)	-	-	-
St_BA1-exp1-ileon_pre	-	(NA NA)	-	-	-	-	(NA NA)	-	-	-	St_BA1-exp1-ileon_BA_2a.d	(01/24/17 00:00:00)	St_BA1-exp1-ileon_BA_2a	baileon1	162	-	(NA NA)	-	-	-
St_BA2-exp1-ileon_pre	-	(NA NA)	-	-	-	-	(NA NA)	-	-	-	St_BA2-exp1-ileon_BA_3a.d	(01/24/17 00:00:00)	St_BA2-exp1-ileon_BA_3a	baileon1	163	-	(NA NA)	-	-	-
St_PA-exp1-ileon_post	-	(NA NA)	-	-	-	St_PA-exp1-ileon_PA_2c.d	(04/21/17 00:00:00)	St_PA-exp1-ileon_PA_2c	paileon1	166	-	(NA NA)	-	-	-	-	(NA NA)	-	-	-
St_PA-exp3-ileon_pre	-	(NA NA)	-	-	-	St_PA-exp3-ileon_PA_2a.d	(04/21/17 00:00:00)	St_PA-exp3-ileon_PA_2a	paileon3	167	-	(NA NA)	-	-	-	-	(NA NA)	-	-	-
St_AA-exp1-ileon_post	-	(NA NA)	-	-	-	-	(NA NA)	-	-	-	-	(NA NA)	-	-	-	St_AA-exp1-ileon_GCMRM_3b.D	(02/17/17 00:00:00)	St_AA-exp1-ileon_3b	gcileon1	174
St_AA_exp2-ileon_pre	-	(NA NA)	-	-	-	-	(NA NA)	-	-	-	-	(NA NA)	-	-	-	St_AA_exp2-ileon_GCMRM_3a.D	(02/20/17 00:00:00)	St_AA_exp2-ileon_3a	gcileon2	175
St_PA-exp3-ileon_post	-	(NA NA)	-	-	-	St_PA-exp3-ileon_PA_2c.d	(04/24/17 00:00:00)	St_PA-exp3-ileon_PA_2c	paileon3	242	-	(NA NA)	-	-	-	-	(NA NA)	-	-	-
St_SCFA1-exp1-ileon_post	St_SCFA1-exp1-ileon_SF_4b.d	(03/10/17 00:00:00)	St_SCFA1-exp1-ileon_SF_4b	sfileon1	251	-	(NA NA)	-	-	-	-	(NA NA)	-	-	-	-	(NA NA)	-	-	-
St_AA_exp2-ileon_post	-	(NA NA)	-	-	-	-	(NA NA)	-	-	-	-	(NA NA)	-	-	-	St_AA_exp2-ileon_GCMRM_3b.D	(02/23/17 00:00:00)	St_AA_exp2-ileon_3b	gcileon2	251
St_BA2-exp1-ileon_post	-	(NA NA)	-	-	-	-	(NA NA)	-	-	-	St_BA2-exp1-ileon_BA_3b.d	(01/27/17 00:00:00)	St_BA2-exp1-ileon_BA_3b	baileon1	261	-	(NA NA)	-	-	-
St_BA1-exp1-ileon_post	-	(NA NA)	-	-	-	-	(NA NA)	-	-	-	St_BA1-exp1-ileon_BA_2b.d	(01/27/17 00:00:00)	St_BA1-exp1-ileon_BA_2b	baileon1	262	-	(NA NA)	-	-	-

## Sheet: VarInfos
Analyte	MetName	IsSTD	IsISO	RT	LevelAnnot	OriginalName	Class	MF	Mass	HMDB	KEGG	PC	Chebi	OGName	PCu	Method	SBR	myQC_CV_AreaQCCorr_2	myQC_Sum_SBR>5	myQC_Sum_Height>0	Analyte.sfileon1	Analyte.sfileon2	Analyte.sfileon3	Analyte.paileon1	Analyte.paileon2	Analyte.paileon3	Analyte.baileon1	Analyte.baileon2	Analyte.baileon3	Analyte.gcileon1	Analyte.gcileon2	Analyte.gcileon3
12-dehydrocholic acid@5.31-ba	12-dehydrocholic acid	FALSE	FALSE	5.306	1	12-dehydrocholic acid	Steroids	C24H38O5	406.272	HMDB00400	C01292	94235	-	12-dehydrocholic acid	94235	ba	529	172.34	11	12	-	-	-	-	-	-	12-dehydrocholic acid@5.31-ba	12-dehydrocholic acid@5.24-ba	12-dehydrocholic acid@5.47-ba	-	-	-
2-hydroxy-2-methylbutyric acid@3.48-sf	2-hydroxy-2-methylbutyric acid	FALSE	FALSE	3.484	1	2-hydroxy-2-methylbutyric_acid	Fatty Acyls	C5H10O3	118.063	-	-	95433	-	2-hydroxy-2-methylbutyric acid	95433	sf	100	31.925	0	10	2-hydroxy-2-methylbutyric acid@3.46-sf	2-hydroxy-2-methylbutyric acid@3.48-sf	2-hydroxy-2-methylbutyric acid@3.50-sf	-	-	-	-	-	-	-	-	-
2-hydroxy-3-methylbutyric acid@4.59-sf	2-hydroxy-3-methylbutyric acid	FALSE	FALSE	4.594	1	2-hydroxy-3-methylbutyric_acid	Fatty Acyls	C5H10O3	118.063	-	-	5289545	-	2-hydroxy-2-methylbutyric acid	5289545	sf	100	22.771	0	10	2-hydroxy-3-methylbutyric acid@4.57-sf	2-hydroxy-3-methylbutyric acid@4.60-sf	2-hydroxy-3-methylbutyric acid@4.63-sf	-	-	-	-	-	-	-	-	-
2-hydroxybutyric acid@2.50-sf	2-hydroxybutyric acid	FALSE	FALSE	2.497	1	2-hydroxybutyric_acid	Organic acids	C4H8O3	104.047	HMDB00008	C05984	440864;11266	chebiId:1148;chebiId:50613	2-hydroxybutyric acid	11266	sf	100	23.27	0	10	2-hydroxybutyric acid@2.48-sf	2-hydroxybutyric acid@2.50-sf	2-hydroxybutyric acid@2.51-sf	-	-	-	-	-	-	-	-	-
2-hydroxyglutaric acid@13.00-gc	2-hydroxyglutaric acid	FALSE	FALSE	12.998	1	2-hydroxyglutaric_acid	Organic acids	C5H8O5	148.037	HMDB00606;HMDB59655	C02630;C01087	43	chebiId:17084	2-hydroxyglutaric acid	43	gc	785	5.036	9	9	-	-	-	-	-	-	-	-	-	2-hydroxyglutaric acid@13.00-gc	2-hydroxyglutaric acid@13.00-gc	2-hydroxyglutaric acid@13.00-gc
2-oxoglutaric acid@13.01-gc	2-oxoglutaric acid	FALSE	FALSE	13.005	1	2-oxoglutaric_acid	Organic acids	C5H6O5	146.022	HMDB00208	C00026	51	chebiId:30915	2-oxoglutaric acid	51	gc	100	5.717	9	9	-	-	-	-	-	-	-	-	-	2-oxoglutaric acid@13.00-gc	2-oxoglutaric acid@13.00-gc	2-oxoglutaric acid@13.01-gc
2-oxovaleric acid@14.62-sf	2-oxovaleric acid	FALSE	FALSE	14.615	1	2-oxovaleric_acid	-	-	-	-	-	-	-	-	-	sf	100	42.421	0	10	2-oxovaleric acid@14.61-sf	2-oxovaleric acid@14.62-sf	2-oxovaleric acid@14.62-sf	-	-	-	-	-	-	-	-	-
3-hydroxybutyric acid@1.66-sf	3-hydroxybutyric acid	FALSE	FALSE	1.659	1	3-hydroxybutyric_acid	Organic acids	C4H8O3	104.047	HMDB00357;HMDB00011	C01089	441;92135	chebiId:10983;chebiId:17066;chebiId:20067	3-hydroxybutyric acid	441	sf	100	15.633	0	10	3-hydroxybutyric acid@1.64-sf	3-hydroxybutyric acid@1.66-sf	3-hydroxybutyric acid@1.67-sf	-	-	-	-	-	-	-	-	-
3-hydroxyisovaleric acid@7.82-gc	3-hydroxyisovaleric acid	FALSE	FALSE	7.822	1	3-hydroxyisovaleric_acid	Fatty Acyls	C5H10O3	118.063	HMDB00754	-	69362	chebiId:37084	3-hydroxyisovaleric acid	69362	gc	1970	17.745	0	9	-	-	-	-	-	-	-	-	-	3-hydroxyisovaleric acid@7.82-gc	3-hydroxyisovaleric acid@7.82-gc	3-hydroxyisovaleric acid@7.82-gc
3-methylhistidine@16.87-gc	3-methylhistidine	FALSE	FALSE	16.866	1	3-methylhistidine	Amino acids	C7H11N3O2	169.085	HMDB00479	C01152	64969;565965	chebiId:27596	3-methylhistidine	565965	gc	204	30.583	0	9	-	-	-	-	-	-	-	-	-	3-methylhistidine@16.91-gc	3-methylhistidine@16.84-gc	3-methylhistidine@16.84-gc
4-hydroxymandelic acid@15.21-gc	4-hydroxymandelic acid	FALSE	FALSE	15.212	1	4-hydroxymandelic_acid	Unclassified	C8H8O4	168.042	HMDB00822	C11527	328	chebiId:16388	4-hydroxymandelic acid	328	gc	100	8.637	9	9	-	-	-	-	-	-	-	-	-	4-hydroxymandelic acid@15.21-gc	4-hydroxymandelic acid@15.21-gc	4-hydroxymandelic acid@15.22-gc
4-hydroxyproline@12.45-gc	4-hydroxyproline	FALSE	FALSE	12.445	1	4-hydroxyproline	Amino acids	C5H9NO3	131.058	HMDB00725	C01157	825;5810;5238478	chebiId:18095	4-hydroxyproline	5238478	gc	100	72.167	8	9	-	-	-	-	-	-	-	-	-	4-hydroxyproline@12.45-gc	4-hydroxyproline@12.45-gc	4-hydroxyproline@12.44-gc
5-aminovaleric acid@13.52-gc	5-aminovaleric acid	FALSE	FALSE	13.517	1	5-aminovaleric_acid	Amino acids	C5H11NO2	117.079	HMDB03355	C00431	138;6992101	chebiId:15887	5-aminovaleric acid	138	gc	238	21.564	9	9	-	-	-	-	-	-	-	-	-	5-aminovaleric acid@13.52-gc	5-aminovaleric acid@13.51-gc	5-aminovaleric acid@13.52-gc
5-oxoproline@12.34-gc	5-oxoproline	FALSE	FALSE	12.343	1	5-oxoproline	Amino acids	C5H7NO3	129.043	HMDB00805;HMDB00267	C02237;C01879	439685;499;7405	chebiId:16010;chebiId:16924;chebiId:18183	5-oxoproline	499	gc	56483	15.337	9	9	-	-	-	-	-	-	-	-	-	5-oxoproline@12.34-gc	5-oxoproline@12.34-gc	5-oxoproline@12.35-gc
7,12-dihydroxy-3-oxocholanoic acid@7.00-ba	7,12-dihydroxy-3-oxocholanoic acid	FALSE	FALSE	6.997	1	3-dehydrocholic acid	Steroids	C24H38O5	406.272	-	-	5283956	-	Dehydrocholic acid	5283956	ba	10	108.757	11	12	-	-	-	-	-	-	7,12-dihydroxy-3-oxocholanoic acid@7.00-ba	7,12-dihydroxy-3-oxocholanoic acid@6.89-ba	7,12-dihydroxy-3-oxocholanoic acid@7.27-ba	-	-	-
Acetic acid@1.79-sf	Acetic acid	FALSE	FALSE	1.791	1	Acetic_acid	Organic acids	C2H4O2	60.021	HMDB00042	C00033	176;21980959	chebiId:15366	Acetic acid	176	sf	100	7.151	10	10	Acetic acid@1.78-sf	Acetic acid@1.79-sf	Acetic acid@1.80-sf	-	-	-	-	-	-	-	-	-
Acetoacetic acid@13.46-sf	Acetoacetic acid	FALSE	FALSE	13.455	1	Acetoacetic_acid	Organic acids	C4H6O3	102.032	HMDB00060	C00164	96	chebiId:13705;chebiId:15344	Acetoacetic acid	96	sf	100	23.069	0	10	Acetoacetic acid@13.43-sf	Acetoacetic acid@13.46-sf	Acetoacetic acid@13.49-sf	-	-	-	-	-	-	-	-	-
Adenine@16.18-gc	Adenine	FALSE	FALSE	16.183	1	Adenine	Bases	C5H5N5	135.054	HMDB00034	C00147	190	chebiId:16708	Adenine	190	gc	100	88.145	9	9	-	-	-	-	-	-	-	-	-	Adenine@16.19-gc	Adenine@16.18-gc	Adenine@16.18-gc
Alanine@6.91-gc	Alanine	FALSE	FALSE	6.912	1	Alanine	Amino acids	C3H7NO2	89.048	HMDB01310;HMDB00161	C00133;C00041	71080;602;5950;7311724;57383916	chebiId:15570;chebiId:16977	Alanine	57383916	gc	19092	152.993	9	9	-	-	-	-	-	-	-	-	-	Alanine@6.91-gc	Alanine@6.91-gc	Alanine@6.92-gc
Allantoin@16.53-gc	Allantoin	FALSE	FALSE	16.531	1	Allantoin	Organic acids	C4H6N4O3	158.044	HMDB00462	C02350;C01551	204;439714	chebiId:15678	Allantoin	204	gc	100	94.156	5	9	-	-	-	-	-	-	-	-	-	Allantoin@16.53-gc	Allantoin@16.53-gc	Allantoin@16.54-gc
Alpha-muricholic acid@5.91-ba	Alpha-muricholic acid	FALSE	FALSE	5.906	1	Alpha-muricholic acid	Steroids	C24H40O5	408.288	HMDB00506	C17647	5283852;3083761	chebiId:81243	Alpha-muricholic acid	3083761	ba	459	160.493	11	12	-	-	-	-	-	-	Alpha-muricholic acid@5.90-ba	Alpha-muricholic acid@5.86-ba	Alpha-muricholic acid@6.06-ba	-	-	-
Alpha-tocopherol@29.50-gc	Alpha-tocopherol	FALSE	FALSE	29.499	1	Alpha-tocopherol	Prenols	C29H50O2	430.381	HMDB01893	C02477	14985;2116	chebiId:18145	Alpha-tocopherol	2116	gc	100	24.996	6	9	-	-	-	-	-	-	-	-	-	Alpha-tocopherol@29.50-gc	Alpha-tocopherol@29.50-gc	Alpha-tocopherol@29.51-gc
Anthranilic acid@13.42-gc	Anthranilic acid	FALSE	FALSE	13.419	1	Anthranilic_acid	Unclassified	C7H7NO2	137.048	HMDB01123	C00108	227;3734162	chebiId:30754	Anthranilic acid	227	gc	180	15.824	1	9	-	-	-	-	-	-	-	-	-	Anthranilic acid@13.42-gc	Anthranilic acid@13.42-gc	Anthranilic acid@13.42-gc
Arabinose@14.16-gc	Arabinose	FALSE	FALSE	14.163	1	Arabinose	Carbohydrates	C5H10O5	150.053	HMDB00646	C00216;C00259	66308;6902;439195	chebiId:17108;chebiId:46994	Arabinose	439195	gc	100	2.719	9	9	-	-	-	-	-	-	-	-	-	Arabinose@14.16-gc	Arabinose@14.16-gc	Arabinose@14.16-gc
Arabitol@14.80-gc	Arabitol	FALSE	FALSE	14.804	1	Arabitol	Carbohydrates	C5H12O5	152.068	HMDB01851;HMDB00568	C00532;C01904	439255;94154	chebiId:18403;chebiId:18333	Arabitol	439255	gc	100	1.825	9	9	-	-	-	-	-	-	-	-	-	Arabitol@14.80-gc	Arabitol@14.80-gc	Arabitol@14.81-gc
Arachidonic acid@23.73-gc	Arachidonic acid	FALSE	FALSE	23.728	1	Arachidonic_acid	Fatty Acyls	C20H32O2	304.24	HMDB01043	C00219	444899;231	chebiId:15843	Arachidonic acid	231	gc	1231	5.405	9	9	-	-	-	-	-	-	-	-	-	Arachidonic acid@23.73-gc	Arachidonic acid@23.72-gc	Arachidonic acid@23.74-gc
Asparagine@14.11-gc	Asparagine	FALSE	FALSE	14.108	1	Asparagine	Amino acids	C4H8N2O3	132.053	HMDB00168	C00152	236;6267;5247114	chebiId:17196	Asparagine	236	gc	100	18.403	9	9	-	-	-	-	-	-	-	-	-	Asparagine@14.11-gc	Asparagine@14.10-gc	Asparagine@14.11-gc
Aspartic acid@12.35-gc	Aspartic acid	FALSE	FALSE	12.351	1	Aspartic_acid	Amino acids	C4H7NO4	133.038	HMDB06483;HMDB00191	C00402;C00049	83887;5960;424;23443619;57397078	chebiId:17364;chebiId:17053	Aspartic acid	23443619	gc	100	37.56	9	9	-	-	-	-	-	-	-	-	-	Aspartic acid@12.35-gc	Aspartic acid@12.35-gc	Aspartic acid@12.36-gc
Behenic acid@26.40-gc	Behenic acid	FALSE	FALSE	26.398	1	Behenic_acid	Fatty Acyls	C22H44O2	340.334	HMDB00944	C08281	8215	chebiId:23858;chebiId:28941	Behenic acid	8215	gc	2537	7.991	9	9	-	-	-	-	-	-	-	-	-	Behenic acid@26.40-gc	Behenic acid@26.39-gc	Behenic acid@26.40-gc
Benzoic acid@8.76-gc	Benzoic acid	FALSE	FALSE	8.757	1	Benzoic_acid	Unclassified	C7H6O2	122.037	HMDB01870	C00180	243;20144841	chebiId:30746	Benzoic acid	20144841	gc	194039	5.65	0	9	-	-	-	-	-	-	-	-	-	Benzoic acid@8.76-gc	Benzoic acid@8.76-gc	Benzoic acid@8.76-gc
Beta-alanine@11.15-gc	Beta-alanine	FALSE	FALSE	11.155	1	Beta-alanine	Amino acids	C3H7NO2	89.048	HMDB00056	C00099	239;4755801	chebiId:16958	Beta-alanine	239	gc	694	26.869	9	9	-	-	-	-	-	-	-	-	-	Beta-alanine@11.15-gc	Beta-alanine@11.15-gc	Beta-alanine@11.15-gc
Beta-hydroxypyruvic acid@14.00-sf	Beta-hydroxypyruvic acid	FALSE	FALSE	13.997	1	Beta-hydroxypyruvic_acid	Organic acids	C3H4O4	104.011	HMDB01352	C00168	964	chebiId:30841	Beta-hydroxypyruvic acid	964	sf	100	15.701	0	10	Beta-hydroxypyruvic acid@13.99-sf	Beta-hydroxypyruvic acid@14.01-sf	Beta-hydroxypyruvic acid@14.00-sf	-	-	-	-	-	-	-	-	-
Beta-muricholic acid@6.17-ba	Beta-muricholic acid	FALSE	FALSE	6.174	1	Beta-muricholic acid	Steroids	C24H40O5	408.288	HMDB00415	C17726	5283853;3083762	chebiId:81298	Beta-muricholic acid	3083762	ba	60291	169.902	11	12	-	-	-	-	-	-	Beta-muricholic acid@6.17-ba	Beta-muricholic acid@6.12-ba	Beta-muricholic acid@6.35-ba	-	-	-
Butanoic acid@5.28-sf	Butanoic acid	FALSE	FALSE	5.278	1	Butanoic_acid	Fatty Acyls	C4H8O2	88.052	HMDB00039	C00246	264	chebiId:30772	Butanoic acid	264	sf	100	50.763	2	10	Butanoic acid@5.25-sf	Butanoic acid@5.28-sf	Butanoic acid@5.32-sf	-	-	-	-	-	-	-	-	-
Cadaverine@4.55-pa	Cadaverine	FALSE	FALSE	4.546	1	Cadaverine	Unclassified	C5H14N2	102.116	HMDB02322	C01672	273	chebiId:18127	Cadaverine	273	pa	10	11.638	8	8	-	-	-	Cadaverine@4.55-pa	Cadaverine@4.59-pa	Cadaverine@4.49-pa	-	-	-	-	-	-
Capric acid@11.44-gc	Capric acid	FALSE	FALSE	11.44	1	Capric_acid	Fatty Acyls	C10H20O2	172.146	HMDB00511	C01571	2969	chebiId:30813	Capric acid	2969	gc	90762	5.473	0	9	-	-	-	-	-	-	-	-	-	Capric acid@11.44-gc	Capric acid@11.44-gc	Capric acid@11.44-gc
Caproic acid@12.09-sf	Caproic acid	FALSE	FALSE	12.085	1	Caproic_acid	Fatty Acyls	C6H12O2	116.084	HMDB00535	C01585	8892	chebiId:30776	Caproic acid	8892	sf	100	8.056	0	10	Caproic acid@12.06-sf	Caproic acid@12.09-sf	Caproic acid@12.10-sf	-	-	-	-	-	-	-	-	-
Caprylic acid@8.95-gc	Caprylic acid	FALSE	FALSE	8.949	1	Caprylic_acid	Fatty Acyls	C8H16O2	144.115	HMDB00482	C06423	379	chebiId:28837	Caprylic acid	379	gc	41559	5.854	9	9	-	-	-	-	-	-	-	-	-	Caprylic acid@8.95-gc	Caprylic acid@8.95-gc	Caprylic acid@8.95-gc
Chenodeoxycholic acid@10.27-ba	Chenodeoxycholic acid	FALSE	FALSE	10.269	1	Chenodeoxycholic acid	Steroids	C24H40O4	392.293	HMDB00518	C02528	10133	chebiId:16755	Chenodeoxycholic acid	10133	ba	31670	131.032	0	12	-	-	-	-	-	-	Chenodeoxycholic acid@10.27-ba	Chenodeoxycholic acid@10.23-ba	Chenodeoxycholic acid@10.38-ba	-	-	-
Cholesterol@29.50-gc	Cholesterol	FALSE	FALSE	29.496	1	Cholesterol	Steroids	C27H46O	386.355	HMDB00067	C00187	6432564;5997	chebiId:16113	Cholesterol	5997	gc	604	3.617	9	9	-	-	-	-	-	-	-	-	-	Cholesterol@29.50-gc	Cholesterol@29.50-gc	Cholesterol@29.50-gc
Cholic acid@9.09-ba	Cholic acid	FALSE	FALSE	9.086	1	Cholic acid	Steroids	C24H40O5	408.288	HMDB00619	C00695;C01558	221493;303;439520	chebiId:16359;chebiId:22868;chebiId:3098	Cholic acid	303	ba	598	158.356	11	12	-	-	-	-	-	-	Cholic acid@9.08-ba	Cholic acid@9.06-ba	Cholic acid@9.18-ba	-	-	-
Citric acid;Isocitric acid@15.80-gc	Citric acid;Isocitric acid	FALSE	FALSE	15.8	1	Citric_acid__Isocitric_acid	Organic acids	C6H8O7	192.027	HMDB00094;HMDB00193	C00158;C00311	311;19782904;88113319;1198	chebiId:30769;chebiId:30887	Citric acid;Isocitric acid	19782904;1198	gc	1729	16.604	9	9	-	-	-	-	-	-	-	-	-	Citric acid;Isocitric acid@15.80-gc	Citric acid;Isocitric acid@15.79-gc	Citric acid;Isocitric acid@15.80-gc
Citrulline@15.77-gc	Citrulline	FALSE	FALSE	15.767	1	Citrulline	Amino acids	C6H13N3O3	175.096	HMDB00904	C00327	833;9750;25244873	chebiId:16349	Citrulline	25244873	gc	100	109.723	5	9	-	-	-	-	-	-	-	-	-	Citrulline@15.77-gc	Citrulline@15.76-gc	Citrulline@15.77-gc
Creatine@12.79-gc	Creatine	FALSE	FALSE	12.792	1	Creatine	Amino acids	C4H9N3O2	131.069	HMDB00064	C00300	586	chebiId:16919	Creatine	586	gc	254	60.51	9	9	-	-	-	-	-	-	-	-	-	Creatine@12.79-gc	Creatine@12.79-gc	Creatine@12.79-gc
Cytosine@12.37-gc	Cytosine	FALSE	FALSE	12.366	1	Cytosine	Bases	C4H5N3O	111.043	HMDB00630	C00380	597	chebiId:16040	Cytosine	597	gc	100	114.396	0	9	-	-	-	-	-	-	-	-	-	Cytosine@12.38-gc	Cytosine@12.35-gc	Cytosine@12.38-gc
Deoxycholic acid@10.48-ba	Deoxycholic acid	FALSE	FALSE	10.48	1	Deoxycholic acid	Steroids	C24H40O4	392.293	HMDB00626	C11171;C04483	222528;2987;23668196	chebiId:9177;chebiId:28834	Deoxycholic acid	2987	ba	33257	114.34	0	12	-	-	-	-	-	-	Deoxycholic acid@10.48-ba	Deoxycholic acid@10.44-ba	Deoxycholic acid@10.59-ba	-	-	-
Dimethylglycine@5.43-gc	Dimethylglycine	FALSE	FALSE	5.435	1	Dimethylglycine	Amino acids	C4H9NO2	103.063	HMDB00092	C01026	673	chebiId:17724	Dimethylglycine	673	gc	1926289	8.158	0	9	-	-	-	-	-	-	-	-	-	Dimethylglycine@5.43-gc	Dimethylglycine@5.44-gc	Dimethylglycine@5.45-gc
Erythritol@12.29-gc	Erythritol	FALSE	FALSE	12.289	1	Erythritol	Carbohydrates	C4H10O4	122.058	HMDB02994	C00503	222285;8998	chebiId:17113;chebiId:48299	Erythritol	8998	gc	287	2.58	9	9	-	-	-	-	-	-	-	-	-	Erythritol@12.29-gc	Erythritol@12.29-gc	Erythritol@12.29-gc
Ferulic acid@19.18-gc	Ferulic acid	FALSE	FALSE	19.177	1	Ferulic_acid	Flavonoids	C10H10O4	194.058	HMDB00537;HMDB00954	C01494	445858;709	chebiId:17620	Ferulic acid	445858	gc	100	4.54	9	9	-	-	-	-	-	-	-	-	-	Ferulic acid@19.18-gc	Ferulic acid@19.17-gc	Ferulic acid@19.18-gc
Fructose@16.47-gc	Fructose	FALSE	FALSE	16.468	1	Fructose	Carbohydrates	C6H12O6	180.063	HMDB00660	C00095;C02336	5984;439163;439709	chebiId:15824;chebiId:37721;chebiId:28645	Fructose	439163	gc	4736	4.228	9	9	-	-	-	-	-	-	-	-	-	Fructose@16.47-gc	Fructose@16.47-gc	Fructose@16.48-gc
Fumaric acid@10.06-gc	Fumaric acid	FALSE	FALSE	10.057	1	Fumaric_acid	Organic acids	C4H4O4	116.011	HMDB00134	C00122	444972	chebiId:18012	Fumaric acid	444972	gc	6054	5.66	9	9	-	-	-	-	-	-	-	-	-	Fumaric acid@10.06-gc	Fumaric acid@10.06-gc	Fumaric acid@10.06-gc
GABA@12.44-gc	GABA	FALSE	FALSE	12.438	1	GABA	Amino acids	C4H9NO2	103.063	HMDB00112	C00334	119;6992099	chebiId:16865	GABA	119	gc	177	14.783	9	9	-	-	-	-	-	-	-	-	-	GABA@12.44-gc	GABA@12.43-gc	GABA@12.44-gc
Galactitol;Sorbitol;Mannitol@17.27-gc	Galactitol;Sorbitol;Mannitol	FALSE	FALSE	17.274	1	Galactitol__Sorbitol__Mannitol	Carbohydrates	C6H14O6	182.079	HMDB00107;HMDB00765;HMDB00247	C01697;C00392;C00794	11850;6251;5780	chebiId:16813;chebiId:16899;chebiId:17924	Galactitol;Mannitol;Sorbitol	11850;6251;5780	gc	519	3.11	9	9	-	-	-	-	-	-	-	-	-	Galactitol;Sorbitol;Mannitol@17.27-gc	Galactitol;Sorbitol;Mannitol@17.27-gc	Galactitol;Sorbitol;Mannitol@17.28-gc
Galactose;Glucose;Mannose@17.00-gc	Galactose;Glucose;Mannose	FALSE	FALSE	16.998	1	Galactose__Glucose__Mannose	Carbohydrates	C6H12O6	180.063	HMDB00143;HMDB33704;HMDB00122;HMDB03345;HMDB00516;HMDB00169	C00124;C01582;C00984;C01825;C00031;C00267;C00221;C00159	439357;6036;3037556;12003287;79025;5793;206;64689;161658;18950	chebiId:4139;chebiId:28061;chebiId:28260;chebiId:42905;chebiId:4167;chebiId:17925;chebiId:15903;chebiId:4208	Galactose;Glucose;Mannose	12003287;206;161658	gc	256	3.181	9	9	-	-	-	-	-	-	-	-	-	Galactose;Glucose;Mannose@17.00-gc	Galactose;Glucose;Mannose@16.99-gc	Galactose;Glucose;Mannose@17.00-gc
Glucose-6-phosphate;Fructose-6-phosphate@23.81-gc	Glucose-6-phosphate;Fructose-6-phosphate	FALSE	FALSE	23.806	1	Glucose-6-phosphate__Fructose-6-phosphate	Carbohydrates	C6H13O9P	260.03	HMDB00124;HMDB03971;HMDB01401;HMDB03498	C05345;C00085;C00668;C00092;C01172	69507;440641;439160;5958;208;439284;439427	chebiId:16084;chebiId:15946;chebiId:61553;chebiId:17665;chebiId:4170;chebiId:17719	Fructose-6-phosphate;Glucose-6-phosphate	439160;208	gc	100	7.494	9	9	-	-	-	-	-	-	-	-	-	Glucose-6-phosphate;Fructose-6-phosphate@23.81-gc	Glucose-6-phosphate;Fructose-6-phosphate@23.80-gc	Glucose-6-phosphate;Fructose-6-phosphate@23.81-gc
Glutamic acid@13.52-gc	Glutamic acid	FALSE	FALSE	13.523	1	Glutamic_acid	Amino acids	C5H9NO4	147.053	HMDB03339;HMDB00148	C00025;C00302;C00217	611;33032;57397101;23327	chebiId:16015;chebiId:15966;chebiId:18327	Glutamic acid	57397101	gc	100	82.196	9	9	-	-	-	-	-	-	-	-	-	Glutamic acid@13.53-gc	Glutamic acid@13.52-gc	Glutamic acid@13.52-gc
Glutamine@15.23-gc	Glutamine	FALSE	FALSE	15.234	1	Glutamine	Amino acids	C5H10N2O3	146.069	HMDB00641;HMDB03423	C00064;C00819	5961;145815;25244553;738	chebiId:18050;chebiId:17061	Glutamine	25244553	gc	100	59.947	3	9	-	-	-	-	-	-	-	-	-	Glutamine@15.26-gc	Glutamine@15.22-gc	Glutamine@15.23-gc
Glyceric acid@9.95-gc	Glyceric acid	FALSE	FALSE	9.954	1	Glyceric_acid	Carbohydrates	C3H6O4	106.027	HMDB00139	C00258	752;439194	chebiId:32398	Glyceric acid	752	gc	4380	3.276	9	9	-	-	-	-	-	-	-	-	-	Glyceric acid@9.95-gc	Glyceric acid@9.95-gc	Glyceric acid@9.95-gc
Glycerol@9.20-gc	Glycerol	FALSE	FALSE	9.198	1	Glycerol	Carbohydrates	C3H8O3	92.047	HMDB00131	C00116	753	chebiId:17754	Glycerol	753	gc	481987	2.846	9	9	-	-	-	-	-	-	-	-	-	Glycerol@9.20-gc	Glycerol@9.20-gc	Glycerol@9.20-gc
Glycerol-3-phosphate@15.21-gc	Glycerol-3-phosphate	FALSE	FALSE	15.212	1	Glycerol-3-phosphate	Lipids	C3H9O6P	172.014	HMDB00126	C00093	754;439162	chebiId:15978	Glycerol-3-phosphate	754	gc	100	6.156	9	9	-	-	-	-	-	-	-	-	-	Glycerol-3-phosphate@15.21-gc	Glycerol-3-phosphate@15.21-gc	Glycerol-3-phosphate@15.21-gc
Glycine@9.60-gc	Glycine	FALSE	FALSE	9.602	1	Glycine	Amino acids	C2H5NO2	75.032	HMDB00123	C00037	750;5257127	chebiId:15428	Glycine	5257127	gc	165	50.083	9	9	-	-	-	-	-	-	-	-	-	Glycine@9.60-gc	Glycine@9.60-gc	Glycine@9.60-gc
Glycochenodeoxycholic acid@9.22-ba	Glycochenodeoxycholic acid	FALSE	FALSE	9.22	1	Glycochenodeoxycholic acid	Steroids	C26H43NO5	449.314	HMDB00637;HMDB06898	C05466;C05462	22833540;12544	chebiId:36274	Glycochenodeoxycholic acid	12544	ba	248	67.026	0	12	-	-	-	-	-	-	Glycochenodeoxycholic acid@9.22-ba	Glycochenodeoxycholic acid@9.20-ba	Glycochenodeoxycholic acid@9.29-ba	-	-	-
Glycocholic acid@5.78-ba	Glycocholic acid	FALSE	FALSE	5.775	1	Glycocholic acid	Steroids	C26H43NO6	465.309	HMDB00138	C01921	10140;23617285;755	chebiId:17687	Glycocholic acid	755	ba	413	113.801	11	12	-	-	-	-	-	-	Glycocholic acid@5.78-ba	Glycocholic acid@5.72-ba	Glycocholic acid@5.95-ba	-	-	-
Glycodeoxycholic acid@9.48-ba	Glycodeoxycholic acid	FALSE	FALSE	9.481	1	Glycodeoxycholic acid	Steroids	C26H43NO5	449.314	HMDB00631	C05464	3035026;22833539	chebiId:27471	Glycodeoxycholic acid	22833539	ba	133	57.387	0	12	-	-	-	-	-	-	Glycodeoxycholic acid@9.49-ba	Glycodeoxycholic acid@9.46-ba	Glycodeoxycholic acid@9.55-ba	-	-	-
Glycohyodeoxycholic acid@5.49-ba	Glycohyodeoxycholic acid	FALSE	FALSE	5.489	1	Glycohyodeoxycholic acid	-	-	-	-	-	-	-	-	-	ba	162	73.501	0	12	-	-	-	-	-	-	Glycohyodeoxycholic acid@5.49-ba	Glycohyodeoxycholic acid@5.44-ba	Glycohyodeoxycholic acid@5.64-ba	-	-	-
Glycolic acid@6.25-gc	Glycolic acid	FALSE	FALSE	6.248	1	Glycolic_acid	Organic acids	C2H4O3	76.016	HMDB00115	C00160	757;3698251	chebiId:17497	Glycolic acid	3698251	gc	315709	2.467	0	9	-	-	-	-	-	-	-	-	-	Glycolic acid@6.24-gc	Glycolic acid@6.25-gc	Glycolic acid@6.25-gc
Glycoursodeoxycholic acid@5.10-ba	Glycoursodeoxycholic acid	FALSE	FALSE	5.104	1	Glycoursodeoxycholic acid	Steroids	C26H43NO5	449.314	HMDB00708	-	12310288	-	Glycoursodeoxycholic acid	12310288	ba	272	90.445	0	12	-	-	-	-	-	-	Glycoursodeoxycholic acid@5.10-ba	Glycoursodeoxycholic acid@5.07-ba	Glycoursodeoxycholic acid@5.23-ba	-	-	-
Guanine@19.93-gc	Guanine	FALSE	FALSE	19.935	1	Guanine	Bases	C5H5N5O	151.049	HMDB00132	C00242	764	chebiId:16235	Guanine	764	gc	100	31.917	9	9	-	-	-	-	-	-	-	-	-	Guanine@19.93-gc	Guanine@19.93-gc	Guanine@19.94-gc
Heptanoic acid@13.89-sf	Heptanoic acid	FALSE	FALSE	13.886	1	Heptanoic_acid	Fatty Acyls	C7H14O2	130.099	HMDB00666	C17714	8094	chebiId:45571	Heptanoic acid	8094	sf	100	8.349	0	10	Heptanoic acid@13.87-sf	Heptanoic acid@13.89-sf	Heptanoic acid@13.89-sf	-	-	-	-	-	-	-	-	-
Hippuric acid@15.85-gc	Hippuric acid	FALSE	FALSE	15.851	1	Hippuric_acid	Unclassified	C9H9NO3	179.058	HMDB00714	C01586	464	chebiId:18089	Hippuric acid	464	gc	570	9.909	9	9	-	-	-	-	-	-	-	-	-	Hippuric acid@15.85-gc	Hippuric acid@15.85-gc	Hippuric acid@15.85-gc
Histidine@16.84-gc	Histidine	FALSE	FALSE	16.837	1	Histidine	Amino acids	C6H9N3O2	155.069	HMDB00177	C00135	6274;773;3651426	-	Histidine	3651426	gc	187	58.997	9	9	-	-	-	-	-	-	-	-	-	Histidine@16.84-gc	Histidine@16.83-gc	Histidine@16.84-gc
Homoserine@10.35-gc	Homoserine	FALSE	FALSE	10.354	1	Homoserine	Amino acids	C4H9NO3	119.058	HMDB00719	C00263	12647;1502076;779;25245858;193314	chebiId:15699	Homoserine	193314	gc	9109	22.622	9	9	-	-	-	-	-	-	-	-	-	Homoserine@10.35-gc	Homoserine@10.35-gc	Homoserine@10.35-gc
Hyocholic acid@8.08-ba	Hyocholic acid	FALSE	FALSE	8.077	1	Hyocholic acid	Steroids	C24H40O5	408.288	HMDB00760	C17649	92805	chebiId:81244	Hyocholate;Hyocholic acid;Iocholic acid;gamma-Muricholate;alpha-Hyocholic acid;3alpha,6alpha,7alpha-Trihydroxy-5beta-cholan-24-oic acid;6alpha-Hydroxychenodeoxycholic acid	92805	ba	979	115.656	0	12	-	-	-	-	-	-	Hyocholic acid@8.08-ba	Hyocholic acid@7.99-ba	Hyocholic acid@8.36-ba	-	-	-
Hyodeoxycholic acid@9.23-ba	Hyodeoxycholic acid	FALSE	FALSE	9.234	1	Hyodeoxycholic acid	Steroids	C24H40O4	392.293	HMDB00733	-	9963687;227033	-	Hyodeoxycholic acid	227033	ba	2272	141.073	11	12	-	-	-	-	-	-	Hyodeoxycholic acid@9.23-ba	Hyodeoxycholic acid@9.20-ba	Hyodeoxycholic acid@9.30-ba	-	-	-
Hypotaurine@13.28-gc	Hypotaurine	FALSE	FALSE	13.282	1	Hypotaurine	Organic acids	C2H7NO2S	109.02	HMDB00965	C00519	107812;25244088	chebiId:16668	Hypotaurine	107812	gc	100	21.415	9	9	-	-	-	-	-	-	-	-	-	Hypotaurine@13.29-gc	Hypotaurine@13.28-gc	Hypotaurine@13.29-gc
Hypoxanthine@15.55-gc	Hypoxanthine	FALSE	FALSE	15.552	1	Hypoxanthine	Bases	C5H4N4O	136.039	HMDB00157	C00262	790	chebiId:17368	Hypoxanthine	790	gc	100	111.457	9	9	-	-	-	-	-	-	-	-	-	Hypoxanthine@15.56-gc	Hypoxanthine@15.55-gc	Hypoxanthine@15.55-gc
Indole-3-acrylic acid@9.67-pa	Indole-3-acrylic acid	FALSE	FALSE	9.667	1	Indole-3-acrylic_acid	Indoles	C11H9NO2	187.063	HMDB00734	-	15030923	-	Indole-3-acrylic acid	15030923	pa	10	34.008	4	8	-	-	-	Indole-3-acrylic acid@9.68-pa	Indole-3-acrylic acid@9.67-pa	Indole-3-acrylic acid@9.67-pa	-	-	-	-	-	-
Inosine@24.88-gc	Inosine	FALSE	FALSE	24.876	1	Inosine	Nucleosides	C10H12N4O5	268.081	HMDB00195	C00294	6021	chebiId:17596	Inosine	6021	gc	100	5.785	9	9	-	-	-	-	-	-	-	-	-	Inosine@24.88-gc	Inosine@24.87-gc	Inosine@24.88-gc
Inositol@19.61-gc	Inositol	FALSE	FALSE	19.611	1	Inositol	Unclassified	C6H12O6	180.063	HMDB06088;HMDB00211	C06153;C00137;C19891	892	chebiId:10642;chebiId:17268	Inositol	892	gc	1280	2.956	9	9	-	-	-	-	-	-	-	-	-	Inositol@19.61-gc	Inositol@19.60-gc	Inositol@19.62-gc
Isobutyric acid@4.90-sf	Isobutyric acid	FALSE	FALSE	4.899	1	Isobutyric_acid	Organic acids	C4H8O2	88.052	HMDB01873	C02632	6590	chebiId:16135	Isobutyric acid	6590	sf	100	12.743	0	10	Isobutyric acid@4.87-sf	Isobutyric acid@4.91-sf	Isobutyric acid@4.93-sf	-	-	-	-	-	-	-	-	-
Isocaproic acid@11.82-sf	Isocaproic acid	FALSE	FALSE	11.818	1	Isocaproic_acid	Fatty Acyls	C6H12O2	116.084	HMDB00689	-	12587	-	Isocaproic acid	12587	sf	100	99.519	0	10	Isocaproic acid@11.79-sf	Isocaproic acid@11.81-sf	Isocaproic acid@11.83-sf	-	-	-	-	-	-	-	-	-
Isoleucine@9.43-gc	Isoleucine	FALSE	FALSE	9.432	1	Isoleucine	Amino acids	C6H13NO2	131.095	HMDB00172	C00407	791;6306	chebiId:17191	Isoleucine	791	gc	215	62.394	9	9	-	-	-	-	-	-	-	-	-	Isoleucine@9.44-gc	Isoleucine@9.43-gc	Isoleucine@9.43-gc
Isovaleric acid@9.06-sf	Isovaleric acid	FALSE	FALSE	9.06	1	Isovaleric_acid	Fatty Acyls	C5H10O2	102.068	HMDB00718	C08262	10430	chebiId:28484	Isovaleric acid	10430	sf	100	22.242	0	10	Isovaleric acid@9.02-sf	Isovaleric acid@9.06-sf	Isovaleric acid@9.10-sf	-	-	-	-	-	-	-	-	-
Ketoisocaproic acid@8.37-gc	Ketoisocaproic acid	FALSE	FALSE	8.367	1	Ketoisocaproic_acid	Organic acids	C6H10O3	130.063	HMDB00695	C00233	70	chebiId:48430	Ketoisocaproic acid	70	gc	100	13.103	9	9	-	-	-	-	-	-	-	-	-	Ketoisocaproic acid@8.37-gc	Ketoisocaproic acid@8.36-gc	Ketoisocaproic acid@8.36-gc
Ketoisovaleric acid@7.34-gc	Ketoisovaleric acid	FALSE	FALSE	7.339	1	Ketoisovaleric_acid	Organic acids	C5H8O3	116.047	HMDB00019	C00141	49	chebiId:11851;chebiId:16530	Ketoisovaleric acid	49	gc	100	6.969	9	9	-	-	-	-	-	-	-	-	-	Ketoisovaleric acid@7.34-gc	Ketoisovaleric acid@7.34-gc	Ketoisovaleric acid@7.34-gc
Kynurenine@21.12-gc	Kynurenine	FALSE	FALSE	21.119	1	Kynurenine	Unclassified	C10H12N2O3	208.085	HMDB00684	C00328	846;161166;25245862	chebiId:16946	Kynurenine	25245862	gc	100	11.068	9	9	-	-	-	-	-	-	-	-	-	Kynurenine@21.12-gc	Kynurenine@21.11-gc	Kynurenine@21.13-gc
Lactic acid@6.40-gc	Lactic acid	FALSE	FALSE	6.4	1	Lactic_acid	Organic acids	C3H6O3	90.032	HMDB01311;HMDB00190	C00256;C00186	61503;107689;19789253;612	chebiId:341;chebiId:42111;chebiId:422	Lactic acid	19789253	gc	914536	2.829	9	9	-	-	-	-	-	-	-	-	-	Lactic acid@6.40-gc	Lactic acid@6.40-gc	Lactic acid@6.40-gc
Lactose@27.25-gc	Lactose	FALSE	FALSE	27.247	1	Lactose	Carbohydrates	C12H22O11	342.116	HMDB00186	C00243	84571;440995	chebiId:17716	Lactose	440995	gc	734	4.751	9	9	-	-	-	-	-	-	-	-	-	Lactose@27.25-gc	Lactose@27.24-gc	Lactose@27.25-gc
Lauric acid@13.76-gc	Lauric acid	FALSE	FALSE	13.755	1	Lauric_acid	Fatty Acyls	C12H24O2	200.178	HMDB00638	C02679	3893	chebiId:30805	Lauric acid	3893	gc	51849	6.101	0	9	-	-	-	-	-	-	-	-	-	Lauric acid@13.75-gc	Lauric acid@13.76-gc	Lauric acid@13.76-gc
Leucine@9.14-gc	Leucine	FALSE	FALSE	9.138	1	Leucine	Amino acids	C6H13NO2	131.095	HMDB00687	C00123	6106;857;5255803	chebiId:15603	Leucine	5255803	gc	100	109.212	9	9	-	-	-	-	-	-	-	-	-	Leucine@9.14-gc	Leucine@9.14-gc	Leucine@9.14-gc
Linoleic acid@21.21-gc	Linoleic acid	FALSE	FALSE	21.208	1	Linoleic_acid	Fatty Acyls	C18H32O2	280.24	HMDB00673	C01595	5280450;3931	chebiId:17351	Linoleic acid	3931	gc	7646	4.235	9	9	-	-	-	-	-	-	-	-	-	Linoleic acid@21.21-gc	Linoleic acid@21.20-gc	Linoleic acid@21.22-gc
Lithocholic acid@11.10-ba	Lithocholic acid	FALSE	FALSE	11.103	1	Lithocholic acid	Steroids	C24H40O3	376.298	HMDB00761	C03990	11740284;9903	chebiId:16325	Lithocholic acid	11740284	ba	39	59.927	8	12	-	-	-	-	-	-	Lithocholic acid@11.10-ba	Lithocholic acid@11.08-ba	Lithocholic acid@11.14-ba	-	-	-
Lysine@16.84-gc	Lysine	FALSE	FALSE	16.836	1	Lysine	Amino acids	C6H14N2O2	146.106	HMDB03405;HMDB00182	C00739;C00047	57449;5962;866;5248709	chebiId:16855;chebiId:18019	Lysine	5248709	gc	100	60.128	9	9	-	-	-	-	-	-	-	-	-	Lysine@16.84-gc	Lysine@16.83-gc	Lysine@16.84-gc
Malic acid@11.97-gc	Malic acid	FALSE	FALSE	11.971	1	Malic_acid	Organic acids	C4H6O5	134.022	HMDB00156;HMDB00744	C00149;C00711	525;20130941;222656	chebiId:30797;chebiId:6650	Malic acid	20130941	gc	277	2.534	9	9	-	-	-	-	-	-	-	-	-	Malic acid@11.97-gc	Malic acid@11.97-gc	Malic acid@11.97-gc
Malonic acid@8.22-gc	Malonic acid	FALSE	FALSE	8.224	1	Malonic_acid	Organic acids	C3H4O4	104.011	HMDB00691	C00383	867;23511544	chebiId:30794	Malonic acid	23511544	gc	100	30.124	9	9	-	-	-	-	-	-	-	-	-	Malonic acid@8.23-gc	Malonic acid@8.22-gc	Malonic acid@8.22-gc
Maltose;Trehalose@27.57-gc	Maltose;Trehalose	FALSE	FALSE	27.572	1	Maltose__Trehalose	Carbohydrates	C12H22O11	342.116	HMDB00163;HMDB00975	C00208;C01083	439341;6255;439186;294;7427;1143	chebiId:17306;chebiId:16551	Maltose;Trehalose	294;1143	gc	667	5.443	9	9	-	-	-	-	-	-	-	-	-	Maltose;Trehalose@27.57-gc	Maltose;Trehalose@27.57-gc	Maltose;Trehalose@27.58-gc
Margaric acid@19.93-gc	Margaric acid	FALSE	FALSE	19.933	1	Margaric_acid	Fatty Acyls	C17H34O2	270.256	HMDB02259	-	10465	-	Margaric acid	10465	gc	6963	5.761	9	9	-	-	-	-	-	-	-	-	-	Margaric acid@19.93-gc	Margaric acid@19.92-gc	Margaric acid@19.94-gc
Methionine@12.31-gc	Methionine	FALSE	FALSE	12.313	1	Methionine	Amino acids	C5H11NO2S	149.051	HMDB00696	C00073	6137;876;5255805	chebiId:16643	Methionine	5255805	gc	100	16.746	9	9	-	-	-	-	-	-	-	-	-	Methionine@12.31-gc	Methionine@12.31-gc	Methionine@12.32-gc
Methylmalonic acid@8.39-gc	Methylmalonic acid	FALSE	FALSE	8.392	1	Methylmalonic_acid	Organic acids	C4H6O4	118.027	HMDB00202	C02170	487	chebiId:30860	Methylmalonic acid	487	gc	100	23.848	9	9	-	-	-	-	-	-	-	-	-	Methylmalonic acid@8.38-gc	Methylmalonic acid@8.40-gc	Methylmalonic acid@8.40-gc
Methylsuccinic acid@9.81-gc	Methylsuccinic acid	FALSE	FALSE	9.807	1	Methylsuccinic_acid	Fatty Acyls	C5H8O4	132.042	HMDB01844	-	10349	-	Methylsuccinic acid	10349	gc	1779	18.114	1	9	-	-	-	-	-	-	-	-	-	Methylsuccinic acid@9.81-gc	Methylsuccinic acid@9.81-gc	Methylsuccinic acid@9.81-gc
Murideoxycholic acid@7.12-ba	Murideoxycholic acid	FALSE	FALSE	7.121	1	Murideoxycholic acid	Steroids	C24H40O4	392.293	HMDB00811	C15515	5283821	CHEBI:52030	Murocholic acid	5283821	ba	156	132.787	11	12	-	-	-	-	-	-	Murideoxycholic acid@7.12-ba	Murideoxycholic acid@7.05-ba	Murideoxycholic acid@7.36-ba	-	-	-
Myristic acid@15.87-gc	Myristic acid	FALSE	FALSE	15.869	1	Myristic_acid	Fatty Acyls	C14H28O2	228.209	HMDB00806	C06424	11005	chebiId:28875;chebiId:30807	Myristic acid	11005	gc	286611	3.417	0	9	-	-	-	-	-	-	-	-	-	Myristic acid@15.87-gc	Myristic acid@15.87-gc	Myristic acid@15.87-gc
N-acetylputrescine@2.96-pa	N-acetylputrescine	FALSE	FALSE	2.96	1	N-acetylputrescine	Organic acids	C6H14N2O	130.111	HMDB02064	C02714	122356	chebiId:17768	N-acetylputrescine	122356	pa	10	7.165	8	8	-	-	-	N-acetylputrescine@2.99-pa	N-acetylputrescine@3.00-pa	N-acetylputrescine@2.87-pa	-	-	-	-	-	-
N-propylamine@5.83-gc	N-propylamine	FALSE	FALSE	5.825	1	N-propylamine	Unclassified	C3H9N	59.074	HMDB34006	-	7852	-	N-propylamine	7852	gc	14199	8.237	0	9	-	-	-	-	-	-	-	-	-	N-propylamine@5.82-gc	N-propylamine@5.83-gc	N-propylamine@5.83-gc
N1-acetylspermidine@5.30-pa	N1-acetylspermidine	FALSE	FALSE	5.299	1	N1-acetylspermidine	Amino acids	C9H21N3O	187.168	HMDB01276	C00612	496	chebiId:17927	N-acetylspermine	496	pa	10	3.308	8	8	-	-	-	N1-acetylspermidine@5.31-pa	N1-acetylspermidine@5.31-pa	N1-acetylspermidine@5.26-pa	-	-	-	-	-	-
N1-acetylspermine@6.80-pa	N1-acetylspermine	FALSE	FALSE	6.797	1	N-acetylspermine	Amino acids	C12H28N4O	244.226	HMDB01186	C02567	916	chebiId:17312	N-acetylspermine	916	pa	10	6.371	8	8	-	-	-	N1-acetylspermine@6.82-pa	N1-acetylspermine@6.82-pa	N1-acetylspermine@6.75-pa	-	-	-	-	-	-
N1,N12-diacetylspermine@5.68-pa	N1,N12-diacetylspermine	FALSE	FALSE	5.68	1	N1-N12-diacetylspermine	Amino acids	C14H30N4O2	286.237	HMDB02172;HMDB41876	C03413	132679;132680	chebiId:28101	N1,N12-diacetylspermine	132680	pa	10	3.219	8	8	-	-	-	N1,N12-diacetylspermine@5.69-pa	N1,N12-diacetylspermine@5.69-pa	N1,N12-diacetylspermine@5.67-pa	-	-	-	-	-	-
N1,N8-diacetylspermidine@4.32-pa	N1,N8-diacetylspermidine	FALSE	FALSE	4.318	1	N1-N8-diacetylspermidine	Amino acids	C11H23N3O2	229.179	HMDB41947	-	389613	-	N1,N8-diacetylspermidine	389613	pa	10	1.73	8	8	-	-	-	N1,N8-diacetylspermidine@4.32-pa	N1,N8-diacetylspermidine@4.32-pa	N1,N8-diacetylspermidine@4.30-pa	-	-	-	-	-	-
N8-acetylspermidine@5.42-pa	N8-acetylspermidine	FALSE	FALSE	5.423	1	N8-acetylspermidine	Amino acids	C9H21N3O	187.168	HMDB02189	C01029	123689	chebiId:27911	N-acetylspermidine	123689	pa	10	6.879	8	8	-	-	-	N8-acetylspermidine@5.44-pa	N8-acetylspermidine@5.44-pa	N8-acetylspermidine@5.41-pa	-	-	-	-	-	-
Niacinamide@11.76-gc	Niacinamide	FALSE	FALSE	11.758	1	Niacinamide	Unclassified	C6H6N2O	122.048	HMDB01406	C00153	936	chebiId:17154	Niacinamide	936	gc	134	102.101	9	9	-	-	-	-	-	-	-	-	-	Niacinamide@11.76-gc	Niacinamide@11.77-gc	Niacinamide@11.75-gc
Nicotinic acid@9.36-gc	Nicotinic acid	FALSE	FALSE	9.36	1	Nicotinic_acid	Unclassified	C6H5NO2	123.032	HMDB01488	C00253	938;117629482	chebiId:15940	Nicotinic acid	117629482	gc	6243	5.141	9	9	-	-	-	-	-	-	-	-	-	Nicotinic acid@9.36-gc	Nicotinic acid@9.36-gc	Nicotinic acid@9.36-gc
Nonanoic acid@10.20-gc	Nonanoic acid	FALSE	FALSE	10.203	1	Nonanoic_acid	Fatty Acyls	C9H18O2	158.131	HMDB00847	C01601	8158	chebiId:29019	Nonanoic acid	8158	gc	124293	3.956	0	9	-	-	-	-	-	-	-	-	-	Nonanoic acid@10.21-gc	Nonanoic acid@10.20-gc	Nonanoic acid@10.20-gc
O-phosphoethanolamine@15.39-gc	O-phosphoethanolamine	FALSE	FALSE	15.394	1	O-phosphoethanolamine	Organic acids	C2H8NO4P	141.019	HMDB00224	C00346	1015;5232324	chebiId:17553	O-phosphoethanolamine	1015	gc	193	15.696	9	9	-	-	-	-	-	-	-	-	-	O-phosphoethanolamine@15.39-gc	O-phosphoethanolamine@15.39-gc	O-phosphoethanolamine@15.39-gc
Oleic acid;Elaidic acid@21.32-gc	Oleic acid;Elaidic acid	FALSE	FALSE	21.322	1	Oleic_acid__Elaidic_acid	Fatty Acyls	C18H34O2	282.256	HMDB00573;HMDB00207	C01712;C00712	637517;445639	chebiId:27997;chebiId:16196	Oleic acid;Elaidic acid	637517;445639	gc	1299	14.433	9	9	-	-	-	-	-	-	-	-	-	Oleic acid;Elaidic acid@21.32-gc	Oleic acid;Elaidic acid@21.31-gc	Oleic acid;Elaidic acid@21.33-gc
Omega-muricholic acid@5.78-ba	Omega-muricholic acid	FALSE	FALSE	5.776	1	Omega-muricholic acid	Steroids	C24H40O5	408.288	HMDB00364	C17727	5283851	chebiId:81299	omega-muricholic acid	5283851	ba	66	127.243	11	12	-	-	-	-	-	-	Omega-muricholic acid@5.78-ba	Omega-muricholic acid@5.75-ba	Omega-muricholic acid@5.92-ba	-	-	-
Ornithine@2.13-pa	Ornithine	FALSE	FALSE	2.133	1	Ornithine	Amino acids	C5H12N2O2	132.09	HMDB03374;HMDB00214	C00077;C00515	6262;389;71082	chebiId:15729;chebiId:16176	Ornithine	389	pa	10	9.061	8	8	-	-	-	Ornithine@2.13-pa	Ornithine@2.13-pa	Ornithine@2.13-pa	-	-	-	-	-	-
Palmitic acid@18.27-gc	Palmitic acid	FALSE	FALSE	18.275	1	Palmitic_acid	Fatty Acyls	C16H32O2	256.24	HMDB00220	C00249	985	chebiId:15756	Palmitic acid	985	gc	366682	4.477	9	9	-	-	-	-	-	-	-	-	-	Palmitic acid@18.27-gc	Palmitic acid@18.27-gc	Palmitic acid@18.29-gc
Palmitoleic acid@17.98-gc	Palmitoleic acid	FALSE	FALSE	17.982	1	Palmitoleic_acid	Fatty Acyls	C16H30O2	254.225	HMDB03229	C08362	445638;4668	chebiId:28716	Palmitoleic acid	445638	gc	1145	5.646	9	9	-	-	-	-	-	-	-	-	-	Palmitoleic acid@17.98-gc	Palmitoleic acid@17.98-gc	Palmitoleic acid@17.99-gc
Pantothenic acid@17.80-gc	Pantothenic acid	FALSE	FALSE	17.797	1	Pantothenic_acid	Amino acids	C9H17NO5	219.111	HMDB00210	C00864	6613;988	chebiId:29032;chebiId:46905;chebiId:7916	Pantothenic acid	988	gc	100	4.382	9	9	-	-	-	-	-	-	-	-	-	Pantothenic acid@17.80-gc	Pantothenic acid@17.79-gc	Pantothenic acid@17.80-gc
Phenylalanine@13.60-gc	Phenylalanine	FALSE	FALSE	13.595	1	Phenylalanine	Amino acids	C9H11NO2	165.079	HMDB00159	C00079	6140;994;57397115	chebiId:17295	Phenylalanine	57397115	gc	1281	52.03	9	9	-	-	-	-	-	-	-	-	-	Phenylalanine@13.60-gc	Phenylalanine@13.59-gc	Phenylalanine@13.60-gc
Phenylbutyric acid@12.42-gc	Phenylbutyric acid	FALSE	FALSE	12.416	1	Phenylbutyric_acid	Unclassified	C10H12O2	164.084	HMDB00329;HMDB01955;HMDB00543	-	4775	-	Phenylbutyric acid	4775	gc	518	114.47	8	9	-	-	-	-	-	-	-	-	-	Phenylbutyric acid@12.41-gc	Phenylbutyric acid@12.42-gc	Phenylbutyric acid@12.42-gc
Phosphoric acid@9.19-gc	Phosphoric acid	FALSE	FALSE	9.188	1	Phosphoric_acid	Unclassified	H3O4P	97.977	HMDB01429;HMDB02142	C00009	1004	chebiId:18367;chebiId:26078	Phosphoric acid	1004	gc	32107	15.116	9	9	-	-	-	-	-	-	-	-	-	Phosphoric acid@9.19-gc	Phosphoric acid@9.19-gc	Phosphoric acid@9.19-gc
Proline@9.47-gc	Proline	FALSE	FALSE	9.466	1	Proline	Amino acids	C5H9NO2	115.063	HMDB03411;HMDB00162	C00763;C00148	8988;145742;25246272;614	chebiId:16313;chebiId:17203	Proline	25246272	gc	100	133.572	5	8	-	-	-	-	-	-	-	-	-	Proline@9.47-gc	Proline@9.47-gc	Proline@9.47-gc
Propionic acid@2.88-sf	Propionic acid	FALSE	FALSE	2.879	1	Propionic_acid	Organic acids	C3H6O2	74.037	HMDB00237	C00163	1032	chebiId:30768	Propionic acid	1032	sf	100	4.322	10	10	Propionic acid@2.86-sf	Propionic acid@2.88-sf	Propionic acid@2.90-sf	-	-	-	-	-	-	-	-	-
Putrescine@4.85-pa	Putrescine	FALSE	FALSE	4.85	1	Putrescine	Unclassified	C4H12N2	88.1	HMDB01414	C00134	1045	chebiId:17148	Putrescine	1045	pa	10	5.74	8	8	-	-	-	Putrescine@4.89-pa	Putrescine@4.86-pa	Putrescine@4.82-pa	-	-	-	-	-	-
Pyruvic acid;Oxaloacetic acid@6.26-gc	Pyruvic acid;Oxaloacetic acid	FALSE	FALSE	6.264	1	Pyruvic acid__Oxaloacetic acid	Organic acids	C4H4O5;C3H4O3	110.011	HMDB00223;HMDB00243	C00036;C00022	970;1060	chebiId:30744;chebiId:32816	Oxaloacetic acid;Pyruvic acid	970;1060	gc	1460	1.391	9	9	-	-	-	-	-	-	-	-	-	Pyruvic acid;Oxaloacetic acid@6.27-gc	Pyruvic acid;Oxaloacetic acid@6.26-gc	Pyruvic acid;Oxaloacetic acid@6.26-gc
Ribitol@14.86-gc	Ribitol	FALSE	FALSE	14.86	1	Ribitol	Carbohydrates	C5H12O5	152.068	HMDB00508	C00474	827	chebiId:15963	Ribitol	827	gc	100	3.989	9	9	-	-	-	-	-	-	-	-	-	Ribitol@14.86-gc	Ribitol@14.86-gc	Ribitol@14.87-gc
Ribose-5-phosphate@20.07-gc	Ribose-5-phosphate	FALSE	FALSE	20.075	1	Ribose-5-phosphate	Carbohydrates	C5H11O8P	230.019	HMDB01548	C00117	439167	chebiId:17797;chebiId:52742	Ribose-5-phosphate	439167	gc	100	7.553	9	9	-	-	-	-	-	-	-	-	-	Ribose-5-phosphate@20.07-gc	Ribose-5-phosphate@20.07-gc	Ribose-5-phosphate@20.09-gc
Ribose;Ribulose@14.33-gc	Ribose;Ribulose	FALSE	FALSE	14.333	1	Ribose__Ribulose	Carbohydrates	C5H10O5	150.053	HMDB00283;HMDB00621;HMDB03371	C00121;C00309;C00508	5779;993;79021;439204;439203	chebiId:47013;chebiId:17173;chebiId:16880	Ribose;Ribulose	993;79021	gc	100	2.273	9	9	-	-	-	-	-	-	-	-	-	Ribose;Ribulose@14.33-gc	Ribose;Ribulose@14.33-gc	Ribose;Ribulose@14.34-gc
Ribulose-5-phosphate@20.31-gc	Ribulose-5-phosphate	FALSE	FALSE	20.31	1	Ribulose-5-phosphate	Carbohydrates	C5H11O8P	230.019	HMDB00618	C00199;C01101	439184;439399	chebiId:17363;chebiId:17666	Ribulose-5-phosphate	439184	gc	100	51.99	0	9	-	-	-	-	-	-	-	-	-	Ribulose-5-phosphate@20.39-gc	Ribulose-5-phosphate@20.29-gc	Ribulose-5-phosphate@20.31-gc
S-adenosylmethionine@4.16-pa	S-adenosylmethionine	FALSE	FALSE	4.162	1	S-adenosylmethionine	Nucleosides	C15H22N6O5S	398.137	HMDB01185	C00019	34756;34755;5136	chebiId:15414;chebiId:67040	S-adenosylmethionine	5136	pa	10	14.626	8	8	-	-	-	S-adenosylmethionine@4.17-pa	S-adenosylmethionine@4.19-pa	S-adenosylmethionine@4.13-pa	-	-	-	-	-	-
Sarcosine@10.53-gc	Sarcosine	FALSE	FALSE	10.526	1	Sarcosine	Amino acids	C3H7NO2	89.048	HMDB00271	C00213	1088;7311726	chebiId:15611	Sarcosine	1088	gc	197	35.147	9	9	-	-	-	-	-	-	-	-	-	Sarcosine@10.53-gc	Sarcosine@10.53-gc	Sarcosine@10.53-gc
Sebacic acid@16.94-gc	Sebacic acid	FALSE	FALSE	16.944	1	Sebacic_acid	Fatty Acyls	C10H18O4	202.121	HMDB00792	C08277	5192	chebiId:41865	Sebacic acid	5192	gc	1606	10.89	0	9	-	-	-	-	-	-	-	-	-	Sebacic acid@16.94-gc	Sebacic acid@16.94-gc	Sebacic acid@16.95-gc
Serine@10.33-gc	Serine	FALSE	FALSE	10.333	1	Serine	Amino acids	C3H7NO3	105.043	HMDB00187;HMDB03406	C00065;C00740	5951;617;6857552;71077	chebiId:17115	Serine	617	gc	100	22.648	9	9	-	-	-	-	-	-	-	-	-	Serine@10.33-gc	Serine@10.32-gc	Serine@10.33-gc
Shikimic acid@15.22-gc	Shikimic acid	FALSE	FALSE	15.22	1	Shikimic_acid	Unclassified	C7H10O5	174.053	HMDB03070	C00493	8742;1094	chebiId:16119	Shikimic acid	1094	gc	197	12.98	9	9	-	-	-	-	-	-	-	-	-	Shikimic acid@15.22-gc	Shikimic acid@15.21-gc	Shikimic acid@15.22-gc
Spermidine@6.58-pa	Spermidine	FALSE	FALSE	6.583	1	Spermidine	Unclassified	C7H19N3	145.158	HMDB01257	C00315	1102	chebiId:16610	Spermidine	1102	pa	10	5.708	8	8	-	-	-	Spermidine@6.58-pa	Spermidine@6.65-pa	Spermidine@6.55-pa	-	-	-	-	-	-
Stearic acid@21.66-gc	Stearic acid	FALSE	FALSE	21.656	1	Stearic_acid	Fatty Acyls	C18H36O2	284.272	HMDB00827	C01530	5281	chebiId:25629;chebiId:28842	Stearic acid	5281	gc	14348	13.722	8	9	-	-	-	-	-	-	-	-	-	Stearic acid@21.66-gc	Stearic acid@21.65-gc	Stearic acid@21.66-gc
Succinic acid@9.64-gc	Succinic acid	FALSE	FALSE	9.644	1	Succinic_acid	Organic acids	C4H6O4	118.027	HMDB00254	C00042	1110;21952380	chebiId:15741	Succinic acid	1110	gc	13434	2.531	9	9	-	-	-	-	-	-	-	-	-	Succinic acid@9.64-gc	Succinic acid@9.64-gc	Succinic acid@9.64-gc
Sucrose@26.88-gc	Sucrose	FALSE	FALSE	26.88	1	Sucrose	Carbohydrates	C12H22O11	342.116	HMDB00258	C00089	5988;1115	chebiId:17992	Sucrose	1115	gc	374288	4.912	0	9	-	-	-	-	-	-	-	-	-	Sucrose@26.88-gc	Sucrose@26.88-gc	Sucrose@26.88-gc
Taurine@14.10-gc	Taurine	FALSE	FALSE	14.103	1	Taurine	Organic acids	C2H7NO3S	125.015	HMDB00251	C00245	1123;4068592	chebiId:15891	Taurine	1123	gc	100	241.073	9	9	-	-	-	-	-	-	-	-	-	Taurine@14.08-gc	Taurine@14.07-gc	Taurine@14.11-gc
Tauro-alpha-muricholic acid;Tauro-beta-muricholic acid;Tauro-omega-muricholic acid@2.08-ba	Tauro-alpha-muricholic acid;Tauro-beta-muricholic acid;Tauro-omega-muricholic acid	FALSE	FALSE	2.076	1	Tauromuricholic acid	Steroids	C26H45NO7S	515.292	HMDB00932	-	101657566;168408	chebiId:133057	TAURO Î±-MURICHOLIC ACID SODIUM SALT;Tauro-beta-muricholic acid	101657566;168408	ba	445	117.989	12	12	-	-	-	-	-	-	Tauro-alpha-muricholic acid;Tauro-beta-muricholic acid;Tauro-omega-muricholic acid@2.03-ba	Tauro-alpha-muricholic acid;Tauro-beta-muricholic acid;Tauro-omega-muricholic acid@2.02-ba	Tauro-alpha-muricholic acid;Tauro-beta-muricholic acid;Tauro-omega-muricholic acid@2.14-ba	-	-	-
Taurochenodeoxycholic acid@6.92-ba	Taurochenodeoxycholic acid	FALSE	FALSE	6.915	1	Taurochenodeoxycholic acid	Steroids	C26H45NO6S	499.297	HMDB00951	C05465	387316	chebiId:16525;chebiId:9407	Taurochenodeoxycholic acid	387316	ba	678	98.15	11	12	-	-	-	-	-	-	Taurochenodeoxycholic acid@6.91-ba	Taurochenodeoxycholic acid@6.84-ba	Taurochenodeoxycholic acid@7.14-ba	-	-	-
Taurocholic acid@4.26-ba	Taurocholic acid	FALSE	FALSE	4.265	1	Taurocholic acid	Steroids	C26H45NO7S	515.292	HMDB00036	C05122	440567;5247;46783527	chebiId:28865	Taurocholic acid	5247	ba	717	127.146	12	12	-	-	-	-	-	-	Taurocholic acid@4.21-ba	Taurocholic acid@4.20-ba	Taurocholic acid@4.33-ba	-	-	-
Taurodeoxycholic acid@8.07-ba	Taurodeoxycholic acid	FALSE	FALSE	8.07	1	Taurodeoxycholic acid	Steroids	C26H45NO6S	499.297	HMDB00896	C05463	2733768;440687;92042745	chebiId:36261;chebiId:9410	Taurodeoxycholic acid	2733768	ba	564	95.561	11	12	-	-	-	-	-	-	Taurodeoxycholic acid@8.07-ba	Taurodeoxycholic acid@7.97-ba	Taurodeoxycholic acid@8.33-ba	-	-	-
Taurohyodeoxycholic acid@4.09-ba	Taurohyodeoxycholic acid	FALSE	FALSE	4.093	1	Taurohyodeoxycholic acid	Steroids	C26H45NO6S	499.297	-	-	119046	-	Taurohyodeoxycholic acid	119046	ba	801	111.541	11	12	-	-	-	-	-	-	Taurohyodeoxycholic acid@4.06-ba	Taurohyodeoxycholic acid@4.05-ba	Taurohyodeoxycholic acid@4.17-ba	-	-	-
Taurolithocholic acid@9.75-ba	Taurolithocholic acid	FALSE	FALSE	9.752	1	Taurolithocholic acid	Steroids	C26H45NO5S	483.302	HMDB00722	C02592	439763;53477716	chebiId:36259	Taurolithocholic acid	439763	ba	1512	65.876	0	12	-	-	-	-	-	-	Taurolithocholic acid@9.75-ba	Taurolithocholic acid@9.71-ba	Taurolithocholic acid@9.82-ba	-	-	-
Tauroursodeoxycholic acid@3.94-ba	Tauroursodeoxycholic acid	FALSE	FALSE	3.937	1	Tauroursodeoxycholic acid	Steroids	C26H45NO6S	499.297	HMDB00874	-	12443252	-	Tauroursodeoxycholic acid	12443252	ba	494	112.28	11	12	-	-	-	-	-	-	Tauroursodeoxycholic acid@3.92-ba	Tauroursodeoxycholic acid@3.89-ba	Tauroursodeoxycholic acid@4.00-ba	-	-	-
Threonic acid@12.73-gc	Threonic acid	FALSE	FALSE	12.731	1	Threonic_acid	Carbohydrates	C4H8O5	136.037	HMDB00943	C01620	151152;439535;5460407	chebiId:15908;chebiId:49060	Threonic acid	439535	gc	100	3.709	9	9	-	-	-	-	-	-	-	-	-	Threonic acid@12.73-gc	Threonic acid@12.73-gc	Threonic acid@12.73-gc
Threonine@10.69-gc	Threonine	FALSE	FALSE	10.688	1	Threonine	Amino acids	C4H9NO3	119.058	HMDB00167	C00188	6288;205;15341575	chebiId:16857	Threonine	15341575	gc	4045	69.531	8	9	-	-	-	-	-	-	-	-	-	Threonine@10.69-gc	Threonine@10.69-gc	Threonine@10.69-gc
Thymine@10.84-gc	Thymine	FALSE	FALSE	10.84	1	Thymine	Bases	C5H6N2O2	126.043	HMDB00262	C00178	1135	chebiId:17821	Thymine	1135	gc	100	152.311	2	9	-	-	-	-	-	-	-	-	-	Thymine@10.84-gc	Thymine@10.84-gc	Thymine@10.84-gc
Tryptophan@21.55-gc	Tryptophan	FALSE	FALSE	21.554	1	Tryptophan	Indoles	C11H12N2O2	204.09	HMDB00929;HMDB30396	C00078;C00806	6305;1148;9060;4099458	chebiId:16828;chebiId:27897	Tryptophan	1148	gc	1387	46.03	9	9	-	-	-	-	-	-	-	-	-	Tryptophan@21.55-gc	Tryptophan@21.55-gc	Tryptophan@21.56-gc
Tyrosine@17.05-gc	Tyrosine	FALSE	FALSE	17.05	1	Tyrosine	Amino acids	C9H11NO3	181.074	HMDB00158	C00082	6057;1153;4300518	chebiId:17895	Tyrosine	1153	gc	100	68.414	9	9	-	-	-	-	-	-	-	-	-	Tyrosine@17.05-gc	Tyrosine@17.05-gc	Tyrosine@17.05-gc
Uracil@10.02-gc	Uracil	FALSE	FALSE	10.016	1	Uracil	Bases	C4H4N2O2	112.027	HMDB00300	C00106	1174	chebiId:17568	Uracil	1174	gc	100	80.428	8	9	-	-	-	-	-	-	-	-	-	Uracil@10.02-gc	Uracil@10.01-gc	Uracil@10.02-gc
Urea@8.61-gc	Urea	FALSE	FALSE	8.61	1	Urea	Organic acids	CH4N2O	60.032	HMDB00294	C00086	1176	chebiId:16199	Urea	1176	gc	1341	60.26	9	9	-	-	-	-	-	-	-	-	-	Urea@8.61-gc	Urea@8.61-gc	Urea@8.61-gc
Uric acid@19.71-gc	Uric acid	FALSE	FALSE	19.715	1	Uric_acid	Bases	C5H4N4O3	168.028	HMDB00289	C00366	1175	chebiId:17775	Uric acid	1175	gc	100	25.414	9	9	-	-	-	-	-	-	-	-	-	Uric acid@19.72-gc	Uric acid@19.71-gc	Uric acid@19.72-gc
Ursodeoxycholic acid@8.79-ba	Ursodeoxycholic acid	FALSE	FALSE	8.786	1	Ursodeoxycholic acid	Steroids	C24H40O4	392.293	HMDB00946	C07880	31401	chebiId:9907	Ursodeoxycholic acid	31401	ba	44	170.323	11	12	-	-	-	-	-	-	Ursodeoxycholic acid@8.78-ba	Ursodeoxycholic acid@8.69-ba	Ursodeoxycholic acid@8.97-ba	-	-	-
Valeric acid@9.58-sf	Valeric acid	FALSE	FALSE	9.576	1	Valeric_acid	Fatty Acyls	C5H10O2	102.068	HMDB00892	C00803	7991	chebiId:17418	Valeric acid	7991	sf	100	14.514	0	10	Valeric acid@9.56-sf	Valeric acid@9.58-sf	Valeric acid@9.62-sf	-	-	-	-	-	-	-	-	-
Valine@8.39-gc	Valine	FALSE	FALSE	8.395	1	Valine	Amino acids	C5H11NO2	117.079	HMDB00883	C00183	6287;1182;5237032	chebiId:16414	Valine	1182	gc	282	127.821	9	9	-	-	-	-	-	-	-	-	-	Valine@8.40-gc	Valine@8.39-gc	Valine@8.39-gc
Xanthine@18.21-gc	Xanthine	FALSE	FALSE	18.209	1	Xanthine	Bases	C5H4N4O2	152.033	HMDB00292	C00385	1188	chebiId:17712;chebiId:48517	Xanthine	1188	gc	100	61.682	9	9	-	-	-	-	-	-	-	-	-	Xanthine@18.21-gc	Xanthine@18.20-gc	Xanthine@18.21-gc
Xylitol@14.67-gc	Xylitol	FALSE	FALSE	14.673	1	Xylitol	Carbohydrates	C5H12O5	152.068	HMDB02917	C00379	6912	chebiId:17151	Xylitol	6912	gc	100	2.785	9	9	-	-	-	-	-	-	-	-	-	Xylitol@14.67-gc	Xylitol@14.67-gc	Xylitol@14.68-gc
Xylose@14.10-gc	Xylose	FALSE	FALSE	14.097	1	Xylose	Carbohydrates	C5H10O5	150.053	HMDB00098	C00181	135191;6027	chebiId:15936;chebiId:53455	Xylose	135191	gc	100	4.852	9	9	-	-	-	-	-	-	-	-	-	Xylose@14.10-gc	Xylose@14.10-gc	Xylose@14.10-gc

## Sheet: Area
Sid	12-dehydrocholic acid@5.31-ba	2-hydroxy-2-methylbutyric acid@3.48-sf	2-hydroxy-3-methylbutyric acid@4.59-sf	2-hydroxybutyric acid@2.50-sf	2-hydroxyglutaric acid@13.00-gc	2-oxoglutaric acid@13.01-gc	2-oxovaleric acid@14.62-sf	3-hydroxybutyric acid@1.66-sf	3-hydroxyisovaleric acid@7.82-gc	3-methylhistidine@16.87-gc	4-hydroxymandelic acid@15.21-gc	4-hydroxyproline@12.45-gc	5-aminovaleric acid@13.52-gc	5-oxoproline@12.34-gc	7,12-dihydroxy-3-oxocholanoic acid@7.00-ba	Acetic acid@1.79-sf	Acetoacetic acid@13.46-sf	Adenine@16.18-gc	Alanine@6.91-gc	Allantoin@16.53-gc	Alpha-muricholic acid@5.91-ba	Alpha-tocopherol@29.50-gc	Anthranilic acid@13.42-gc	Arabinose@14.16-gc	Arabitol@14.80-gc	Arachidonic acid@23.73-gc	Asparagine@14.11-gc	Aspartic acid@12.35-gc	Behenic acid@26.40-gc	Benzoic acid@8.76-gc	Beta-alanine@11.15-gc	Beta-hydroxypyruvic acid@14.00-sf	Beta-muricholic acid@6.17-ba	Butanoic acid@5.28-sf	Cadaverine@4.55-pa	Capric acid@11.44-gc	Caproic acid@12.09-sf	Caprylic acid@8.95-gc	Chenodeoxycholic acid@10.27-ba	Cholesterol@29.50-gc	Cholic acid@9.09-ba	Citric acid;Isocitric acid@15.80-gc	Citrulline@15.77-gc	Creatine@12.79-gc	Cytosine@12.37-gc	Deoxycholic acid@10.48-ba	Dimethylglycine@5.43-gc	Erythritol@12.29-gc	Ferulic acid@19.18-gc
BlM-exp3-ileon_pre	NA	127	56	106	NA	NA	13243	96	NA	NA	NA	NA	NA	NA	NA	2996	9	NA	NA	NA	NA	NA	NA	NA	NA	NA	NA	NA	NA	NA	NA	2446	NA	596	NA	NA	1502	NA	NA	NA	NA	NA	NA	NA	NA	NA	NA	NA	NA
BlM_exp3-ileon_pre	56	NA	NA	NA	3803	71	NA	NA	3628	209	13	239	282	98052	2	NA	NA	16	133515	15	41	17	445	442	284	775	13	70	4631	1064802	2357	NA	55	NA	5101	270987	NA	386361	414	632	147	124033	8	310	4	517	3892500	229	700
BlM-exp3-ileon_post	NA	3	6	19	NA	NA	169	147	NA	NA	NA	NA	NA	NA	NA	2809	6	NA	NA	NA	NA	NA	NA	NA	NA	NA	NA	NA	NA	NA	NA	350	NA	810	NA	NA	1722	NA	NA	NA	NA	NA	NA	NA	NA	NA	NA	NA	NA
BlM-exp2-ileon_pre	NA	134	126	171	NA	NA	20492	111	NA	NA	NA	NA	NA	NA	NA	8462	9	NA	NA	NA	NA	NA	NA	NA	NA	NA	NA	NA	NA	NA	NA	6832	NA	844	NA	NA	1049	NA	NA	NA	NA	NA	NA	NA	NA	NA	NA	NA	NA
BlM_exp2-ileon_4a	827	NA	NA	NA	NA	NA	NA	NA	NA	NA	NA	NA	NA	NA	16	NA	NA	NA	NA	NA	586	NA	NA	NA	NA	NA	NA	NA	NA	NA	NA	NA	5176	NA	NA	NA	NA	NA	100	NA	6879	NA	NA	NA	NA	480	NA	NA	NA
BlM_exp2-ileon_pre	NA	NA	NA	NA	1892	22	NA	NA	2874	2609	12	1100	427	135061	NA	NA	NA	44	340079	14	NA	5	454	2053	2883	1163	1128	6752	13305	2305605	3459	NA	NA	NA	68	332015	NA	416350	NA	872	NA	30250	209	1439	535	NA	3037111	1679	309
BlM_exp1-ileon_pre	350141	NA	NA	NA	2631	102	NA	NA	2722	99	5	816	309	125655	7888	NA	NA	195	192317	37	667586	8	635	104	46	2176	61	3913	5190	991608	1803	NA	5076694	NA	447	257445	NA	282138	214892	1109	7961094	32912	271	482	315	270508	2744570	1135	264
BlM_exp3-ileon_post	24	NA	NA	NA	1366	58	NA	NA	4694	482	122	184	637	117262	10	NA	NA	116	25529	46	61	30	152	800	1692	5914	11	51	4456	1083348	1843	NA	579	NA	289	284909	NA	443106	33	914	1150	5886	92	633	4	216	4809420	2064	13712
BlM-exp2-ileon_post	NA	4	16	56	NA	NA	362	384	NA	NA	NA	NA	NA	NA	NA	7124	21	NA	NA	NA	NA	NA	NA	NA	NA	NA	NA	NA	NA	NA	NA	195	NA	944	NA	NA	1114	NA	NA	NA	NA	NA	NA	NA	NA	NA	NA	NA	NA
BlM-exp1-ileon_5a	NA	81	62	39	NA	NA	9438	145	NA	NA	NA	NA	NA	NA	NA	1276	7	NA	NA	NA	NA	NA	NA	NA	NA	NA	NA	NA	NA	NA	NA	3358	NA	397	NA	NA	558	NA	NA	NA	NA	NA	NA	NA	NA	NA	NA	NA	NA
BlM_exp2-ileon_4b	847	NA	NA	NA	NA	NA	NA	NA	NA	NA	NA	NA	NA	NA	17	NA	NA	NA	NA	NA	1009	NA	NA	NA	NA	NA	NA	NA	NA	NA	NA	NA	5571	NA	NA	NA	NA	NA	26	NA	7170	NA	NA	NA	NA	429	NA	NA	NA
BlM_exp2-ileon_post	NA	NA	NA	NA	1435	30	NA	NA	4215	149	73	245	251	142195	NA	NA	NA	89	23713	18	NA	12	391	3675	6652	5968	3	26	9192	1044306	2188	NA	NA	NA	392	272665	NA	449949	NA	1361	NA	1373	60	498	14	NA	3703194	4148	16675
BlM_exp1-ileon_post	NA	NA	NA	NA	1248	39	NA	NA	2885	273	80	63	255	120046	NA	NA	NA	38	24945	10	NA	46	84	265	1290	9597	17	34	3591	867555	1187	NA	NA	NA	16	272362	NA	336097	NA	1548	NA	2693	48	353	24	NA	3464141	1399	14908
BlM-exp1-ileon_5b	NA	1	10	6	NA	NA	73	88	NA	NA	NA	NA	NA	NA	NA	1450	34	NA	NA	NA	NA	NA	NA	NA	NA	NA	NA	NA	NA	NA	NA	224	NA	360	NA	NA	687	NA	NA	NA	NA	NA	NA	NA	NA	NA	NA	NA	NA
BMl_-exp1-ileon_post	14	NA	NA	NA	NA	NA	NA	NA	NA	NA	NA	NA	NA	NA	25	NA	NA	NA	NA	NA	83	NA	NA	NA	NA	NA	NA	NA	NA	NA	NA	NA	1198	NA	NA	NA	NA	NA	305	NA	3427	NA	NA	NA	NA	206	NA	NA	NA
QC-exp3-ileon_5a	NA	20	1130	1179	NA	NA	1384	5758	NA	NA	NA	NA	NA	NA	NA	26107	16	NA	NA	NA	NA	NA	NA	NA	NA	NA	NA	NA	NA	NA	NA	75	NA	15075	NA	NA	3026	NA	NA	NA	NA	NA	NA	NA	NA	NA	NA	NA	NA
QC_exp123-ileon_pre.baileon3	299884	NA	NA	NA	NA	NA	NA	NA	NA	NA	NA	NA	NA	NA	7010	NA	NA	NA	NA	NA	614043	NA	NA	NA	NA	NA	NA	NA	NA	NA	NA	NA	4298924	NA	NA	NA	NA	NA	163584	NA	6412760	NA	NA	NA	NA	204409	NA	NA	NA
QC-exp3-ileon_5b	NA	15	1383	1149	NA	NA	628	5885	NA	NA	NA	NA	NA	NA	NA	25042	68	NA	NA	NA	NA	NA	NA	NA	NA	NA	NA	NA	NA	NA	NA	282	NA	18262	NA	NA	3941	NA	NA	NA	NA	NA	NA	NA	NA	NA	NA	NA	NA
QC-exp3-ileon_5c	NA	23	1462	1177	NA	NA	639	5877	NA	NA	NA	NA	NA	NA	NA	25405	139	NA	NA	NA	NA	NA	NA	NA	NA	NA	NA	NA	NA	NA	NA	394	NA	19771	NA	NA	4488	NA	NA	NA	NA	NA	NA	NA	NA	NA	NA	NA	NA
QC-exp3-ileon_5d	NA	30	1380	1214	NA	NA	728	5837	NA	NA	NA	NA	NA	NA	NA	25655	153	NA	NA	NA	NA	NA	NA	NA	NA	NA	NA	NA	NA	NA	NA	463	NA	19934	NA	NA	4476	NA	NA	NA	NA	NA	NA	NA	NA	NA	NA	NA	NA
QC_exp3-ileon_6a	NA	NA	NA	NA	41842	25134	NA	NA	12981	510	31669	50339	76743	6011769	NA	NA	NA	96223	51647854	76487	NA	1231	818	2563324	1193243	1578402	9178	28171	47748	1036099	181399	NA	NA	NA	NA	320573	NA	442768	NA	797247	NA	171854	146620	995492	108	NA	2429709	377299	482949
QC-exp3-ileon_5e	NA	39	1519	1187	NA	NA	538	6368	NA	NA	NA	NA	NA	NA	NA	23960	164	NA	NA	NA	NA	NA	NA	NA	NA	NA	NA	NA	NA	NA	NA	530	NA	20555	NA	NA	5239	NA	NA	NA	NA	NA	NA	NA	NA	NA	NA	NA	NA
QC_exp3-ileon_6b	NA	NA	NA	NA	45288	24117	NA	NA	13122	705	30610	144968	96451	6767048	NA	NA	NA	99660	64815766	81124	NA	1108	1309	2616266	1212901	1548686	15105	160830	46018	1076995	220495	NA	NA	NA	NA	363910	NA	461710	NA	787837	NA	174554	222825	2797429	285	NA	2492762	375893	471404
QC_exp3-ileon_5a	295952	NA	NA	NA	46580	26118	NA	NA	12820	941	27702	318649	92443	6732435	4868	NA	NA	101164	69781653	191277	793870	828	1381	2499048	1163802	1474688	44277	862330	51052	1017972	243717	NA	4708714	NA	41680	336889	NA	429894	205603	717896	5214673	311723	260366	4334221	296	185646	1822383	355219	427210
QC-exp3-ileon_5f	NA	34	1404	1318	NA	NA	486	6362	NA	NA	NA	NA	NA	NA	NA	23341	237	NA	NA	NA	NA	NA	NA	NA	NA	NA	NA	NA	NA	NA	NA	507	NA	20261	NA	NA	5547	NA	NA	NA	NA	NA	NA	NA	NA	NA	NA	NA	NA
QC_exp3-ileon_6c	NA	NA	NA	NA	42638	24936	NA	NA	13283	547	30787	236913	109602	7688838	NA	NA	NA	110528	67029986	88589	NA	1222	1554	2667448	1241796	1606698	15500	398963	52188	1128414	241515	NA	NA	NA	NA	378648	NA	478272	NA	785051	NA	181675	268049	3604692	136	NA	2405781	387315	485006
QC_exp3-ileon_5b	283514	NA	NA	NA	45807	25677	NA	NA	13303	398	30459	74960	79942	5994069	4555	NA	NA	100155	56859978	99449	683258	1007	916	2585661	1187201	1589753	17752	48415	48567	1014027	274178	NA	4599152	NA	51188	303869	NA	431807	195922	769644	5053233	253328	182902	1802788	201	183531	1802574	370624	480592
QC-exp3-ileon_5g	NA	41	1397	1292	NA	NA	245	6274	NA	NA	NA	NA	NA	NA	NA	24077	204	NA	NA	NA	NA	NA	NA	NA	NA	NA	NA	NA	NA	NA	NA	536	NA	19831	NA	NA	5383	NA	NA	NA	NA	NA	NA	NA	NA	NA	NA	NA	NA
QC_exp3-ileon_6d	NA	NA	NA	NA	45201	24267	NA	NA	13972	541	33035	108541	93015	7184020	NA	NA	NA	108786	66059709	93341	NA	1274	1635	2583745	1282378	1693760	8313	81291	52494	1189033	226733	NA	NA	NA	NA	362736	NA	492645	NA	829659	NA	185003	232907	2176491	70	NA	2626231	404819	509011
QC-exp3-ileon_5h	NA	89	1398	1310	NA	NA	318	6117	NA	NA	NA	NA	NA	NA	NA	25025	189	NA	NA	NA	NA	NA	NA	NA	NA	NA	NA	NA	NA	NA	NA	488	NA	18903	NA	NA	5413	NA	NA	NA	NA	NA	NA	NA	NA	NA	NA	NA	NA
QC_exp123-ileon_post.baileon3	343797	NA	NA	NA	NA	NA	NA	NA	NA	NA	NA	NA	NA	NA	7981	NA	NA	NA	NA	NA	607835	NA	NA	NA	NA	NA	NA	NA	NA	NA	NA	NA	4623085	NA	NA	NA	NA	NA	173942	NA	6825906	NA	NA	NA	NA	228582	NA	NA	NA
QC-exp2-ileon_5a	NA	41	1603	1449	NA	NA	2083	5109	NA	NA	NA	NA	NA	NA	NA	70519	86	NA	NA	NA	NA	NA	NA	NA	NA	NA	NA	NA	NA	NA	NA	143	NA	30240	NA	NA	2165	NA	NA	NA	NA	NA	NA	NA	NA	NA	NA	NA	NA
QC_exp3-ileon_5c	295480	NA	NA	NA	45506	26006	NA	NA	14341	515	28647	66292	67624	6126909	5069	NA	NA	95251	58599250	88078	804753	1084	812	2563545	1210429	1576412	11111	42669	50143	1029305	206921	NA	4834762	NA	28558	345349	NA	443833	202077	779932	5335287	251861	164526	1669953	105	194963	1898353	384285	490453
QC_exp123-ileon_6a	319394	NA	NA	NA	NA	NA	NA	NA	NA	NA	NA	NA	NA	NA	7995	NA	NA	NA	NA	NA	610984	NA	NA	NA	NA	NA	NA	NA	NA	NA	NA	NA	4623616	NA	NA	NA	NA	NA	170412	NA	7085644	NA	NA	NA	NA	216075	NA	NA	NA
QC_exp2-ileon_5e	218899	NA	NA	NA	NA	NA	NA	NA	NA	NA	NA	NA	NA	NA	6128	NA	NA	NA	NA	NA	463804	NA	NA	NA	NA	NA	NA	NA	NA	NA	NA	NA	3564241	NA	27363	NA	NA	NA	179572	NA	7045439	NA	NA	NA	NA	329030	NA	NA	NA
QC_exp2-ileon_5a	205496	NA	NA	NA	31437	23697	NA	NA	12372	3036	20098	221106	110353	6128365	6150	NA	NA	71793	63754780	82015	434299	834	1404	6621321	1104359	843327	13892	624932	57940	1340990	216455	NA	3502105	NA	27568	324851	NA	475806	178970	583761	6948511	199346	72464	4011951	10942	329079	3105297	433539	421322
QC-exp2-ileon_5b	NA	18	1530	1503	NA	NA	987	5075	NA	NA	NA	NA	NA	NA	NA	70633	115	NA	NA	NA	NA	NA	NA	NA	NA	NA	NA	NA	NA	NA	NA	196	NA	31240	NA	NA	2363	NA	NA	NA	NA	NA	NA	NA	NA	NA	NA	NA	NA
QC_exp2-ileon_5f	212841	NA	NA	NA	NA	NA	NA	NA	NA	NA	NA	NA	NA	NA	8580	NA	NA	NA	NA	NA	461293	NA	NA	NA	NA	NA	NA	NA	NA	NA	NA	NA	3648715	NA	35555	NA	NA	NA	183086	NA	7048719	NA	NA	NA	NA	334433	NA	NA	NA
QC_exp2-ileon_5b	212859	NA	NA	NA	31166	21565	NA	NA	13456	1363	20238	15311	64069	3855547	7351	NA	NA	14098	11486175	8490	449388	687	720	6735060	1108253	870338	3343	7404	48110	1242746	109591	NA	3549836	NA	31334	326384	NA	447986	180617	615859	6978093	135265	5015	85434	181	330748	3290459	439305	492155
QC-exp2-ileon_5c	NA	47	1627	1391	NA	NA	964	5364	NA	NA	NA	NA	NA	NA	NA	69460	91	NA	NA	NA	NA	NA	NA	NA	NA	NA	NA	NA	NA	NA	NA	260	NA	37081	NA	NA	2274	NA	NA	NA	NA	NA	NA	NA	NA	NA	NA	NA	NA
QC_exp3-ileon_5d	313280	NA	NA	NA	47958	23734	NA	NA	15189	417	32010	141215	102014	7346570	6711	NA	NA	111095	65217589	103449	819542	1363	1568	2681897	1246159	1705979	7296	154487	54115	1164366	241700	NA	4870103	NA	36311	323747	NA	480565	205820	818719	5326248	256408	270117	2444850	65	193110	2030839	406631	521106
QC_exp1-ileon_5a	524853	NA	NA	NA	21524	16374	NA	NA	8772	543	12723	42939	62915	4797371	14655	NA	NA	33063	34261296	40545	711641	589	725	1916910	701388	760500	3442	35557	32486	1073212	113139	NA	6016447	NA	28475	357897	NA	369186	275101	422949	9688635	138807	24509	1528704	31	324137	4170510	275051	295221
QC_exp2-ileon_5c	219239	NA	NA	NA	30454	22182	NA	NA	13743	3789	20679	8000	45925	3444596	7860	NA	NA	5034	833494	3293	453469	894	896	6877107	1143081	926602	3376	7543	50756	1285022	83751	NA	3623719	NA	28934	353747	NA	460638	184517	642751	7080420	138172	271	26531	93	329559	3297321	461711	524086
QC-exp2-ileon_5d	NA	63	1773	1538	NA	NA	864	5452	NA	NA	NA	NA	NA	NA	NA	68856	107	NA	NA	NA	NA	NA	NA	NA	NA	NA	NA	NA	NA	NA	NA	292	NA	41753	NA	NA	2634	NA	NA	NA	NA	NA	NA	NA	NA	NA	NA	NA	NA
QC_exp2-ileon_5g	226911	NA	NA	NA	NA	NA	NA	NA	NA	NA	NA	NA	NA	NA	8609	NA	NA	NA	NA	NA	475658	NA	NA	NA	NA	NA	NA	NA	NA	NA	NA	NA	3685202	NA	41268	NA	NA	NA	182269	NA	7102857	NA	NA	NA	NA	341341	NA	NA	NA
QC_exp1-ileon_5b	523299	NA	NA	NA	19776	16354	NA	NA	9145	550	10954	14081	46211	3861253	16197	NA	NA	18068	1172969	10791	777419	477	838	1808345	710370	781237	1828	8134	25029	1067455	77063	NA	6160513	NA	31096	344775	NA	349957	268573	435462	9946487	109600	6042	220241	82	316835	4282485	276156	314768
QC-exp2-ileon_5e	NA	32	1682	1570	NA	NA	828	5207	NA	NA	NA	NA	NA	NA	NA	70152	128	NA	NA	NA	NA	NA	NA	NA	NA	NA	NA	NA	NA	NA	NA	257	NA	20633	NA	NA	2601	NA	NA	NA	NA	NA	NA	NA	NA	NA	NA	NA	NA
QC_exp1-ileon_5c	535034	NA	NA	NA	20617	16191	NA	NA	9909	465	13303	19198	83798	5047365	14146	NA	NA	30680	14552772	13544	754798	833	592	1951731	724899	837388	2344	10403	28218	1127111	79802	NA	6142476	NA	26192	393776	NA	381099	266239	463036	9963110	118371	10604	666491	451	316922	4541972	286716	337586
QC_exp2-ileon_5d	221833	NA	NA	NA	34943	20182	NA	NA	14943	3406	22989	12275	86645	5091636	7902	NA	NA	13537	44870280	6768	451835	936	1030	7361804	1214820	974309	3609	9874	62754	1406757	116392	NA	3602638	NA	24399	366989	NA	511623	183102	673272	7093284	136501	6041	326107	34	333257	3807666	479782	511864
QC_exp1-ileon_6a	NA	NA	NA	NA	19206	15528	NA	NA	8381	1233	12723	14441	49638	4401650	NA	NA	NA	28605	566210	3920	NA	531	831	1938419	730198	874217	2391	10459	30260	1074310	64351	NA	NA	NA	NA	380194	NA	386565	NA	475198	NA	77347	3662	185468	80	NA	5692371	288141	332300
QC_exp3-ileon_5e	316694	NA	NA	NA	NA	NA	NA	NA	NA	NA	NA	NA	NA	NA	5200	NA	NA	NA	NA	NA	798457	NA	NA	NA	NA	NA	NA	NA	NA	NA	NA	NA	4916651	NA	22503	NA	NA	NA	203808	NA	5420786	NA	NA	NA	NA	196398	NA	NA	NA
QC-exp2-ileon_5f	NA	51	1670	1637	NA	NA	662	5778	NA	NA	NA	NA	NA	NA	NA	67484	133	NA	NA	NA	NA	NA	NA	NA	NA	NA	NA	NA	NA	NA	NA	324	NA	41762	NA	NA	3085	NA	NA	NA	NA	NA	NA	NA	NA	NA	NA	NA	NA
QC_exp1-ileon_5d	540191	NA	NA	NA	18955	14347	NA	NA	10474	651	11239	4545	51558	4016368	14821	NA	NA	4121	1307668	321	797441	846	1078	1866436	706196	734703	1742	5889	27108	1116055	57641	NA	6322397	NA	34065	366510	NA	364074	265556	465858	10135391	106102	399	167739	31	311138	4637055	282023	312830
QC_exp3-ileon_5f	322693	NA	NA	NA	NA	NA	NA	NA	NA	NA	NA	NA	NA	NA	5524	NA	NA	NA	NA	NA	797710	NA	NA	NA	NA	NA	NA	NA	NA	NA	NA	NA	4931298	NA	28938	NA	NA	NA	207008	NA	5404394	NA	NA	NA	NA	198588	NA	NA	NA
QC_exp1-ileon_6b	NA	NA	NA	NA	20136	14094	NA	NA	12137	617	10676	254	59715	4858689	NA	NA	NA	927	2019439	895	NA	437	1026	1890799	726787	784880	1918	5628	28741	1212498	46777	NA	NA	NA	NA	376853	NA	390237	NA	459616	NA	109412	511	189953	103	NA	4947401	287738	315098
QC-exp2-ileon_5g	NA	65	1552	1431	NA	NA	725	5703	NA	NA	NA	NA	NA	NA	NA	68144	217	NA	NA	NA	NA	NA	NA	NA	NA	NA	NA	NA	NA	NA	NA	322	NA	45144	NA	NA	3932	NA	NA	NA	NA	NA	NA	NA	NA	NA	NA	NA	NA
QC_batch-exp123-exp1-ileon_SF_8a	NA	6	762	691	NA	NA	768	3156	NA	NA	NA	NA	NA	NA	NA	20199	103	NA	NA	NA	NA	NA	NA	NA	NA	NA	NA	NA	NA	NA	NA	539	NA	9944	NA	NA	2193	NA	NA	NA	NA	NA	NA	NA	NA	NA	NA	NA	NA
QC_batch-exp1-ileon_SF_7a	NA	7	461	433	NA	NA	589	2239	NA	NA	NA	NA	NA	NA	NA	17666	74	NA	NA	NA	NA	NA	NA	NA	NA	NA	NA	NA	NA	NA	NA	497	NA	3831	NA	NA	1891	NA	NA	NA	NA	NA	NA	NA	NA	NA	NA	NA	NA
QC_exp123-ileon_6b	347131	NA	NA	NA	NA	NA	NA	NA	NA	NA	NA	NA	NA	NA	7467	NA	NA	NA	NA	NA	651773	NA	NA	NA	NA	NA	NA	NA	NA	NA	NA	NA	4759339	NA	NA	NA	NA	NA	177557	NA	7158690	NA	NA	NA	NA	228057	NA	NA	NA
QC_exp1-ileon_6c	NA	NA	NA	NA	20721	15370	NA	NA	12229	604	11752	8742	70881	5771513	NA	NA	NA	9879	25316324	3791	NA	781	970	1938035	744938	791464	1467	14779	31565	1215101	72373	NA	NA	NA	NA	408981	NA	415553	NA	478267	NA	117381	4276	629572	58	NA	5016536	295926	339211
QC_exp3-ileon_5g	323900	NA	NA	NA	NA	NA	NA	NA	NA	NA	NA	NA	NA	NA	7239	NA	NA	NA	NA	NA	781988	NA	NA	NA	NA	NA	NA	NA	NA	NA	NA	NA	4834086	NA	23819	NA	NA	NA	205802	NA	5385072	NA	NA	NA	NA	193247	NA	NA	NA
QC_exp123-ileon_pre.baileon1	32	NA	NA	NA	NA	NA	NA	NA	NA	NA	NA	NA	NA	NA	49	NA	NA	NA	NA	NA	84	NA	NA	NA	NA	NA	NA	NA	NA	NA	NA	NA	440	NA	NA	NA	NA	NA	249	NA	1506	NA	NA	NA	NA	706	NA	NA	NA
QC_exp1-ileon_5e	549912	NA	NA	NA	21985	15944	NA	NA	13428	682	13213	3001	54393	5623815	15927	NA	NA	5333	3086791	820	758901	700	890	1935050	734108	787351	1822	10492	31121	1265723	22507	NA	6032367	NA	34804	404225	NA	417251	273238	465466	9898079	118852	349	224702	109	320675	5110987	303045	326861
QC_batch-exp1-ileon_SF_7b	NA	7	447	425	NA	NA	279	2222	NA	NA	NA	NA	NA	NA	NA	18215	117	NA	NA	NA	NA	NA	NA	NA	NA	NA	NA	NA	NA	NA	NA	434	NA	3926	NA	NA	2244	NA	NA	NA	NA	NA	NA	NA	NA	NA	NA	NA	NA
QC_exp1-ileon_6d	NA	NA	NA	NA	19406	13643	NA	NA	8288	937	11676	2349	50201	4330446	NA	NA	NA	4325	577747	726	NA	605	822	1866099	721552	769989	1626	8120	29158	1142308	67859	NA	NA	NA	NA	400326	NA	421706	NA	441355	NA	72034	155	171449	70	NA	5659132	291183	310633
QC_exp1-ileon_5f	541681	NA	NA	NA	NA	NA	NA	NA	NA	NA	NA	NA	NA	NA	14841	NA	NA	NA	NA	NA	739396	NA	NA	NA	NA	NA	NA	NA	NA	NA	NA	NA	6296873	NA	29100	NA	NA	NA	266751	NA	10365949	NA	NA	NA	NA	310276	NA	NA	NA
QC_batch-exp1-ileon_SF_7c	NA	10	557	468	NA	NA	219	2527	NA	NA	NA	NA	NA	NA	NA	19577	121	NA	NA	NA	NA	NA	NA	NA	NA	NA	NA	NA	NA	NA	NA	398	NA	4397	NA	NA	2799	NA	NA	NA	NA	NA	NA	NA	NA	NA	NA	NA	NA
QC_exp1-ileon_5g	572511	NA	NA	NA	NA	NA	NA	NA	NA	NA	NA	NA	NA	NA	14306	NA	NA	NA	NA	NA	823851	NA	NA	NA	NA	NA	NA	NA	NA	NA	NA	NA	6112261	NA	29871	NA	NA	NA	273152	NA	9859531	NA	NA	NA	NA	323924	NA	NA	NA
QC_exp1-ileon_5h	571718	NA	NA	NA	NA	NA	NA	NA	NA	NA	NA	NA	NA	NA	15518	NA	NA	NA	NA	NA	762512	NA	NA	NA	NA	NA	NA	NA	NA	NA	NA	NA	6020489	NA	25153	NA	NA	NA	274796	NA	9921430	NA	NA	NA	NA	330985	NA	NA	NA
QC_batch-exp1-ileon_SF_7d	NA	11	542	469	NA	NA	215	2500	NA	NA	NA	NA	NA	NA	NA	19908	99	NA	NA	NA	NA	NA	NA	NA	NA	NA	NA	NA	NA	NA	NA	440	NA	5052	NA	NA	2890	NA	NA	NA	NA	NA	NA	NA	NA	NA	NA	NA	NA
QC_exp2-ileon_6a	NA	NA	NA	NA	27610	20094	NA	NA	10915	2369	19467	22400	72303	3565582	NA	NA	NA	57546	1456502	10104	NA	746	824	6449195	1077362	847229	4658	9887	50046	1035495	106235	NA	NA	NA	NA	299180	NA	429132	NA	611988	NA	96633	20668	37354	25	NA	2721403	428992	459610
QC_batch-exp1-ileon_SF_7e	NA	17	581	533	NA	NA	239	2424	NA	NA	NA	NA	NA	NA	NA	20641	108	NA	NA	NA	NA	NA	NA	NA	NA	NA	NA	NA	NA	NA	NA	352	NA	5256	NA	NA	2883	NA	NA	NA	NA	NA	NA	NA	NA	NA	NA	NA	NA
QC_exp2-ileon_6b	NA	NA	NA	NA	30300	19727	NA	NA	11371	2894	18492	4912	35959	3461062	NA	NA	NA	5358	686622	2397	NA	558	503	6461582	1071711	821919	3201	5335	50213	1024617	85387	NA	NA	NA	NA	291850	NA	431313	NA	618037	NA	87684	1042	43258	79	NA	2795899	428472	459390
QC_batch-exp1-ileon_SF_7f	NA	11	541	481	NA	NA	172	2712	NA	NA	NA	NA	NA	NA	NA	20203	128	NA	NA	NA	NA	NA	NA	NA	NA	NA	NA	NA	NA	NA	NA	441	NA	4945	NA	NA	3131	NA	NA	NA	NA	NA	NA	NA	NA	NA	NA	NA	NA
QC_exp123-ileon_post.baileon1	405967	NA	NA	NA	NA	NA	NA	NA	NA	NA	NA	NA	NA	NA	10058	NA	NA	NA	NA	NA	750237	NA	NA	NA	NA	NA	NA	NA	NA	NA	NA	NA	5316538	NA	NA	NA	NA	NA	224127	NA	8073583	NA	NA	NA	NA	291961	NA	NA	NA
QC_exp2-ileon_6c	NA	NA	NA	NA	29745	18651	NA	NA	12474	2761	17952	4516	24116	3567392	NA	NA	NA	2424	1145231	389	NA	776	1003	6427525	1060001	821312	3129	4407	49638	1064496	88245	NA	NA	NA	NA	336684	NA	425665	NA	592427	NA	81870	314	26430	94	NA	2891169	430822	454528
QC_batch-exp1-ileon_SF_7g	NA	12	621	386	NA	NA	132	2584	NA	NA	NA	NA	NA	NA	NA	20760	125	NA	NA	NA	NA	NA	NA	NA	NA	NA	NA	NA	NA	NA	NA	312	NA	5313	NA	NA	3199	NA	NA	NA	NA	NA	NA	NA	NA	NA	NA	NA	NA
QC_exp1-ileon_5i	538266	NA	NA	NA	NA	NA	NA	NA	NA	NA	NA	NA	NA	NA	14867	NA	NA	NA	NA	NA	804385	NA	NA	NA	NA	NA	NA	NA	NA	NA	NA	NA	6306064	NA	NA	NA	NA	NA	252856	NA	10253493	NA	NA	NA	NA	303508	NA	NA	NA
QC_batch-exp1-ileon_SF_7h	NA	26	542	493	NA	NA	144	2657	NA	NA	NA	NA	NA	NA	NA	22071	246	NA	NA	NA	NA	NA	NA	NA	NA	NA	NA	NA	NA	NA	NA	208	NA	5560	NA	NA	3456	NA	NA	NA	NA	NA	NA	NA	NA	NA	NA	NA	NA
QC_batch-exp123-exp1-ileon_SF_8b	NA	42	900	742	NA	NA	201	3703	NA	NA	NA	NA	NA	NA	NA	26503	249	NA	NA	NA	NA	NA	NA	NA	NA	NA	NA	NA	NA	NA	NA	334	NA	14065	NA	NA	3230	NA	NA	NA	NA	NA	NA	NA	NA	NA	NA	NA	NA
QC_exp2-ileon_6d	NA	NA	NA	NA	32586	18967	NA	NA	13443	3873	20319	10902	85097	4516754	NA	NA	NA	10639	29449217	4386	NA	661	655	6676307	1114618	879859	3292	8416	61097	1147510	137142	NA	NA	NA	NA	312496	NA	455300	NA	610341	NA	92283	4198	229760	53	NA	2957451	447257	468060
QC_exp1-ileon_5jb	494512	NA	NA	NA	NA	NA	NA	NA	NA	NA	NA	NA	NA	NA	11241	NA	NA	NA	NA	NA	699284	NA	NA	NA	NA	NA	NA	NA	NA	NA	NA	NA	5584129	NA	NA	NA	NA	NA	232440	NA	9291710	NA	NA	NA	NA	280639	NA	NA	NA
Nacl-j3-exp3-ileon_267	458083	66	1217	3596	65586	23333	1177	19814	7903	9144	48589	656453	261987	25891421	15827	34619	155	526899	103900864	139286	1270620	1956	872	823408	432541	7945249	279956	10734671	69789	1015682	460613	68	7105207	12741	NA	371980	2483	372257	608619	1463798	12583356	293408	3414055	7105812	459338	695775	3533931	177383	89817
FECES-j3-exp3-ileon_280	919	8	822	776	27147	11532	681	8747	24509	347	17788	137011	62807	3655946	270	25058	25	75536	33217487	154423	332783	863	813	607206	1473858	618833	1863	66376	23289	1052706	87012	122	3707011	1987	3741	334797	1504	433538	49621	526539	109971	115539	105395	2155140	74	349	3219057	479398	841375
ATB-j7-exp3-ileon_297	39	9	6	325	17089	6530	487	3252	22570	838	7809	31536	28973	1293443	21	4220	16	3065	14165328	58432	265	386	352	445567	439221	198908	126	36754	23339	1471952	35785	58	1130	1485	13858	386727	2297	529940	428	335333	1720	107465	17128	1159145	31	570	6324214	48494	181660
AKKERMANSIA-j14-exp3-ileon_327	791303	5	363	534	29007	20945	511	1954	14813	516	15138	321065	132210	7219734	1416	12583	56	68751	49849807	356658	348197	189	1223	1135997	2991299	347091	15112	783241	45435	845173	272891	164	2679976	1063	210955	285516	1080	354359	201199	124328	8167331	242730	123768	3067122	86	258382	1212199	812023	392406
Nacl-j7-exp3-ileon_291	455706	31	902	763	15402	28980	858	3134	8287	594	15456	137141	38427	5224553	6330	17581	24	40495	60110458	78070	247823	757	679	15056516	732942	370009	18235	252494	30516	983232	107105	137	1118408	8539	46538	343195	1147	377736	114586	270787	7262434	77267	127609	1114965	62	323852	3028774	293270	199982
ATB-j3-exp3-ileon_273	163	13	2	284	22158	12568	516	1695	21069	1165	14069	7440	86598	1949191	22	4832	15	21747	412627	347936	5419	418	809	3043674	2179326	454539	1736	3385	22013	1094475	41365	78	36758	410	11382	337747	1659	400818	971	304854	12009	162659	22214	262812	6	476	3416812	190428	689923
FECES-j7-exp3-ileon_304	57286	12	1532	853	42110	46643	694	4092	19337	847	31922	393787	129628	12585826	1399	15709	83	93192	65356179	174569	3003438	909	1438	1930638	1192955	563106	47939	670797	67828	880878	387225	80	13404328	1537	28158	321704	1399	365394	236741	791104	1229301	374338	313263	6011986	493	NA	1567761	575539	791796
ATB-j14-exp3-ileon_314	5274	6	26	196	10060	6308	276	950	22113	395	7736	134	14460	1068993	179	4092	18	575	178804	8762	6646	780	589	1318386	560576	217182	619	190	47547	733710	22403	134	69534	1326	7153	270103	1238	326373	2298	370533	170459	83509	1200	207617	31	4166	6025350	40184	367713
FECES-j14-exp3-ileon_323	630657	6	1301	2846	117664	78524	753	9421	11786	1177	47325	233570	356225	9204743	18721	49835	135	340947	87073557	929206	2034224	914	5485	1104859	1305913	1136874	42404	436203	49113	664189	924041	232	6548841	36385	38000	358695	3102	369334	903682	799986	13061584	347992	387567	3529722	288	326289	2563998	1308442	354423
Nacl-j3-exp3-ileon_269	862574	32	2465	3759	52344	17938	850	8585	6990	855	37798	421722	72198	8113936	22029	40373	288	99488	82243631	51116	908320	1430	747	1883238	774541	2039870	25982	601629	23348	843386	363112	244	5801982	72751	76536	299237	2164	357559	355948	857619	11783340	106391	319035	3158441	216	534226	3757793	443677	171868
FECES-j7-exp3-ileon_301	22243	24	1708	1640	58418	34198	554	4389	18595	346	31528	100303	190180	7191066	1073	32393	51	75207	22779504	132351	896545	959	1247	897893	947743	1210540	10534	25734	46146	704426	256603	288	6530744	1862	39539	290698	1955	340308	76310	681861	774763	277523	80197	2850614	139	172	4454623	860246	826489
ATB-j3-exp3-ileon_272	1462	4	16	194	13631	8330	332	992	57003	595	10732	3905	45648	1801179	52	4466	37	17450	56768	26832	1288	349	678	2681461	1475849	187572	614	3460	31671	1105990	6560	155	11547	572	3493	304053	1504	392988	488	356635	28255	110885	7014	287373	26	1058	10124977	105643	573970
AKKERMANSIA-j14-exp3-ileon_329	315921	38	795	1423	49632	25041	496	7431	11796	679	67506	491656	100540	7781895	9790	21821	211	97151	111602674	95286	474372	1123	692	1017261	1552850	2298987	34235	461924	32022	658350	394852	263	3182939	7000	95433	297296	3217	378061	282425	1011887	7534614	345294	216576	4100474	400	80141	1903582	481420	323150
Nacl-j7-exp3-ileon_290	104963	26	873	563	20829	27419	700	1529	21555	545	9689	658884	223590	11893490	877	27995	11	84667	67343649	347455	27180	597	2213	2644332	2862924	353535	145757	2139902	60674	1328838	386983	233	173033	9270	94305	401424	1181	490735	26061	404250	682747	418403	445033	3364950	3292	78612	2585472	756162	438774
FECES-j3-exp3-ileon_278	860	19	674	1015	33934	11997	498	5076	15910	971	23081	37347	39476	5279483	182	24239	61	101523	49903697	28348	828999	1388	676	623593	1089352	2546410	700	8424	26859	1070041	87646	255	6279519	1597	18975	319498	1680	418180	110016	1012100	237481	89907	271418	785777	38	2428	3117813	424541	787666
AKKERMANSIA-j3-exp3-ileon_284	150	14	634	320	138098	38495	644	3651	29301	156	18414	8205	59550	3481744	81	12624	57	1755	2162791	32468	123054	953	589	630361	1262316	631801	1801	17649	94249	1258736	37698	205	2294018	1494	68517	400337	2524	456937	59109	671411	66332	111385	3685	325605	24	634	8780591	220247	762302
ATB-j7-exp3-ileon_296	530	12	12	241	15024	5328	389	924	19341	139	9578	2641	17117	1457175	11	4394	8	8147	224360	29120	3770	361	273	1586419	895502	165203	377	944	24786	1347887	27014	169	35517	256	1672	414509	1383	502636	1164	354131	28367	70644	3573	157062	74	1061	2530920	89965	361055
Nacl-j3-exp3-ileon_268	1823548	59	1143	3683	33162	21774	685	10732	8657	1272	18420	147104	60710	16115103	10593	28556	220	209380	48023144	25047	1070020	802	1285	659339	100528	4772246	73773	2169274	26455	768110	205777	345	8316478	13829	1974	313212	3606	317882	645835	508689	17199127	83499	488471	2105929	24102	1292390	7752120	108789	85833
AKKERMANSIA-j14-exp3-ileon_325	40469	5	5676	836	40553	15932	741	2622	23004	600	9803	61067	43073	3072818	761	17830	56	60915	31143793	50430	133466	525	689	5987903	783837	480371	5199	46466	80067	753756	126638	266	1503079	16673	169091	464050	6141	435824	70284	349019	2278744	115144	67850	1148162	69	54484	3270335	281389	229525
ATB-j3-exp3-ileon_275	146	8	46	368	26205	12616	363	2895	20719	177	8226	1563	81071	1342384	10	4528	50	3025	676639	197881	4476	445	527	1161944	764176	279972	331	362	37874	1078492	33634	275	43845	1721	6171	330115	2691	433097	1058	404098	9067	127840	7996	413255	5	502	5509858	87416	362495
AKKERMANSIA-j3-exp3-ileon_286	933	20	239	136	45621	13246	130	861	19882	769	17771	773	11479	2838303	112	6197	41	357	735917	489	383250	531	239	357926	1318105	220589	685	1654	20369	1149071	26921	553	2992373	59	706	367166	2382	414722	40040	562997	141149	100304	141	55112	197	599	3084058	256034	1190717
FECES-j7-exp3-ileon_305	65354	50	373	936	30736	37351	551	9641	13721	1369	43726	129788	107874	15577624	959	12676	75	102031	42834398	85486	2841978	736	1235	1465992	900154	661521	13567	265611	84685	660199	305507	553	16045728	416	14773	284532	2156	325664	379258	590523	2495050	250878	207488	4030572	159	6850	1152997	664583	613314
AKKERMANSIA-j7-exp3-ileon_310	11241	18	433	603	40611	96959	1013	2298	15469	2616	53776	102424	185396	9197202	430	7887	239	74381	115257961	248196	786195	1385	1575	7758267	1606288	1359961	40027	91069	69452	646003	290362	386	6816680	619	46996	306318	2105	320080	185503	845943	924074	327638	323883	3076293	121	1830	1096801	394444	615721
ATB-j14-exp3-ileon_317	85	21	130	499	47998	14807	407	1710	24978	515	45340	49010	41191	4495811	3	4354	70	37853	11545171	29249	1758	2036	1203	1450390	1038566	4239022	964	34929	53111	834108	116947	266	13679	1243	2342	338994	1586	365342	569	1455024	3070	647685	48368	1769141	20	336	5791851	62495	415943
Nacl-j7-exp3-ileon_292	426715	80	1378	1328	33645	25232	860	5544	12721	1589	22203	660288	174048	12368782	4835	41919	173	104374	93804298	257907	168992	1334	1915	1132585	1012909	2011524	108532	1972266	68033	955692	364680	360	1070631	26795	30347	348745	2035	443130	79381	953589	4035400	230157	806578	3292057	31983	470890	4314306	608939	260511
AKKERMANSIA-j7-exp3-ileon_307	13220	28	121	371	12649	12774	422	1398	27966	331	19114	13160	18670	2701791	767	6298	117	22105	396489	19093	1116760	489	421	3850718	266337	209951	4098	3181	23645	667079	46334	559	8445182	383	126	251313	2563	324530	227234	435475	920244	88968	17765	61856	38	1887	3619919	140315	266141
FECES-j14-exp3-ileon_322	1068779	53	2993	2457	55118	32935	929	2309	24797	1280	19424	476338	226785	13014432	20312	31901	218	67135	18356121	239154	1407657	1012	1670	1433794	3520427	775111	26204	1805393	117502	574120	276469	446	7687370	36973	94923	299973	1997	288028	652089	361785	12549544	278558	201476	1923101	123998	554676	6064814	1486236	482773
ATB-j7-exp3-ileon_299	2578	27	120	931	62756	12592	532	3804	13109	1146	64714	137586	83924	10184517	76	4235	259	54509	80426194	41038	6499	2288	685	1906814	785124	2053218	11076	184820	30788	933000	93510	288	48871	732	670	328754	1356	355232	2110	1650134	75708	240153	86779	6194621	73	2221	4979224	73122	543901
AKKERMANSIA-j3-exp3-ileon_283	989	55	3456	3080	67274	27908	1453	3736	13745	732	26240	26654	67292	4578002	71	20712	133	32323	8193485	116746	348787	1009	800	1087324	2501207	1288860	2427	8235	37774	967271	105855	454	2902219	541	91952	279766	2305	386770	40207	695666	155781	95272	70076	1233634	15	810	2729186	585109	702593
FECES-j7-exp3-ileon_302	13509	31	1474	686	53095	17080	749	2865	16922	469	27392	27003	32058	3982530	1475	10059	83	16602	64586573	38589	833040	725	880	5012992	475036	2037300	3310	11843	33121	629888	90729	358	4520240	2332	3619	239687	2567	338771	193716	763538	979260	62173	98436	1253075	27	4641	1677390	408830	393831
Nacl-j3-exp3-ileon_270	928434	42	1298	2011	43015	10741	770	21731	12095	1318	11100	91659	106458	11862096	25716	80679	145	423281	6694684	24687	1498825	1160	1504	295638	398336	3007938	7030	555451	44657	718976	193730	481	5844576	168288	14369	244874	3351	349049	367645	821503	9409668	123384	137400	251735	41536	556852	11476643	348707	125283
AKKERMANSIA-j14-exp3-ileon_328	714855	72	389	1149	27895	37269	895	6563	21781	1358	53890	92994	68568	8072554	4874	14332	117	152653	86778676	44956	973422	1152	941	21764063	1246155	4950920	13292	81895	41370	657199	192073	526	4358548	3229	68123	342449	1060	361719	438697	824829	12449410	99943	103704	1773218	114	551517	3341914	343040	257367
FECES-j3-exp3-ileon_281	1745	9	155	710	33931	26212	591	6988	17550	810	36847	9266	64530	3877832	864	34791	189	38351	774686	141809	1331672	1096	820	2022139	2462059	388672	1770	1458	38346	1313717	69369	449	12289988	741	20800	382504	1647	445452	210858	485153	630533	93212	40711	48979	72	3977	2045669	413950	1005861
ATB-j3-exp3-ileon_271	1580	14	9	354	17170	11454	347	2229	36857	150	13423	2899	60369	1811071	9	3868	48	20415	211525	141331	1058	369	903	2352754	2143138	142343	459	446	33492	1150636	47830	224	10182	1634	4608	317935	1838	411374	406	263157	22240	147231	23911	474290	98	1543	1905070	127532	834803
FECES-j14-exp3-ileon_324	1235728	58	843	3048	40312	15021	501	32083	10546	402	44866	41713	37605	8204772	29546	38189	134	239702	48614685	15540	1450854	1250	390	259474	172134	8944247	2542	69631	28656	618726	126053	534	10708867	15556	9781	290091	1490	324989	524929	720410	17212909	73199	55314	770724	158	872478	5265057	202112	81673
AKKERMANSIA-j7-exp3-ileon_308	3762	13	1451	407	17553	8006	468	1166	24970	289	14494	3050	14584	2218418	276	8651	81	2108	524136	1940	254325	749	502	21790474	682659	482185	7254	1889	36410	639020	49778	402	1139692	434	129558	249768	1325	343698	37543	556891	559203	52881	582	20629	44	620	2235946	281060	315544
Nacl-j3-exp3-ileon_266	746903	36	835	828	44484	38886	498	4221	21096	167	17124	498139	248885	14528988	24834	34561	152	177440	90134638	261087	701865	412	1794	4381238	3473315	655205	54049	1105324	58097	1104632	560983	496	4453294	42811	80059	317717	4647	429425	228298	440299	10444787	535708	688965	3913162	597	528721	2529032	1070429	498244
ATB-j14-exp3-ileon_316	517	9	53	401	31967	9369	335	1237	27035	167	25134	4336	27741	2665030	9	4076	79	7060	732970	12325	881	1079	391	1570240	794776	499115	450	3892	45055	722717	42221	482	8833	1646	505	315807	1641	317021	500	923011	9062	145722	8662	74838	44	553	2745205	74459	523861
AKKERMANSIA-j3-exp3-ileon_287	325	60	24820	2712	179975	43946	832	8066	21297	405	32806	151567	111656	9418498	272	28589	142	42572	49557743	90995	181068	1196	875	880650	1673756	2564150	805	94952	53513	1035584	127406	374	1891994	3320	4904	290919	2298	409060	33517	861536	94761	225117	144302	2485619	121	474	7435930	428201	621894
FECES-j7-exp3-ileon_303	24761	23	424	912	34987	29172	559	8217	15989	890	25285	153803	78653	8164976	756	17278	174	49137	68044113	99411	1353216	909	929	2281783	787976	2958946	13254	216128	82815	682442	243741	365	6821163	8422	16397	335372	5118	376692	222739	700004	958798	317944	259290	3074056	27	4871	2025363	310395	559219
Nacl-j3-exp2-ileon_266	239044	22	688	464	26570	32415	1515	2026	22244	2240	18424	827122	205916	12843899	6130	32025	116	197065	86611533	233218	433901	645	1702	942906	3051503	454802	132484	3131228	101614	1136194	447692	202	3983336	6475	67860	312744	2821	448194	150884	468551	5859091	375319	341678	8860847	253278	297056	2329718	1272004	443782
ATB-j7-exp3-ileon_298	946	18	86	334	13256	6476	401	1485	24164	492	13733	2362	14156	2525583	10	4454	72	5461	717703	6788	3566	1299	423	1675558	724572	3099985	639	2285	79184	1136342	30219	354	24733	771	1104	397573	2732	379221	486	1060512	13528	73774	6581	28177	7	681	2149978	58718	518839
ATB-j3-exp2-ileon_274	648	7	46	241	27466	9993	970	1021	20260	56	8542	819	36727	1444324	187	6927	38	181	14133139	3448	3397	618	339	4423493	814170	369298	267	282	29021	1096303	39749	133	26065	669	2320	280623	1055	413193	2099	445515	69762	75049	223	53016	45	999	4165067	103193	405247
AKKERMANSIA-j14-exp3-ileon_326	336699	16	1787	1508	61712	28678	579	2008	26728	388	25860	96635	70282	6513133	3460	32498	47	154706	66890088	57328	1860725	593	1098	770175	953272	374564	10766	110837	86940	798011	229600	543	14271615	6186	156561	322856	2523	367527	373363	461309	8606668	196736	196754	1195793	518	24350	1610708	612732	365279
MITSUAKI-j3-exp2-ileon_286	36000	13	553	729	19241	31327	1409	7034	18339	509	11659	3567	45755	2789651	2925	95472	66	2439	376079	8934	517759	638	499	3300608	1663442	390207	2711	3995	54273	1392289	46212	157	5236049	2394	40148	358734	1879	512886	70027	436669	3783470	150607	729	362099	11	315	3325135	682956	566595
Nacl-j7-exp3-ileon_289	1199659	178	3740	1683	40143	22667	750	3703	11279	452	11488	486445	140282	9888317	14633	62087	82	284188	65644800	91839	964207	737	1811	1334550	1128096	776094	32978	1383023	25649	1192781	470599	551	3554578	31717	81675	411079	2760	515806	166808	391324	8365153	208051	639924	1693147	1608	324473	3477678	662466	228185
MITSUAKI-j7-exp2-ileon_310	1982818	25	124	580	10460	15384	1102	7608	9013	662	10021	58746	69778	5376841	26548	133970	33	66882	54055818	18475	859913	578	663	186556	294184	358794	19451	77847	48715	706195	272566	141	10251906	1922	69683	263046	1378	362169	201196	510303	17890653	58748	45798	1034637	145	340730	1656568	324397	210882
FECES-j3-exp3-ileon_279	1998	11	456	640	20544	11448	315	5961	21012	624	23123	225729	89841	7838887	141	9692	56	94291	66061577	63745	248180	1577	802	367363	936196	2794394	6849	460488	69097	1088502	116424	380	3060819	2310	56134	292787	2291	398871	45469	1079510	165622	109620	424785	3444618	286	1787	3897566	416155	634346
BURKO-j3-exp2-ileon_280	12286	12	449	702	40535	25986	1524	6915	22703	877	14113	642	64854	3028077	1687	77754	48	1081	325318	2179	85703	835	398	324171	1300439	346997	1967	1852	35681	1471695	33749	207	1575334	3427	2763	457675	1272	490039	11159	515723	1630074	132035	251	27945	34	6329	4589733	402727	878523
AKKERMANSIA-j7-exp3-ileon_309	20280	23	64	495	31107	30531	476	2001	13589	2049	51162	81541	63719	8452479	1057	8664	71	85187	83642915	49909	1133834	1625	1607	3003640	964069	5076760	24508	81479	76732	643673	136925	522	9624871	1251	53713	296016	2067	343456	363787	1088426	1567777	143745	302330	2433856	166	2505	1364372	253847	547931
ATB-j14-exp2-ileon_317	2100	14	79	382	6525	14690	798	2356	32968	537	11317	135	60593	1555870	21	7882	20	4531	177607	37963	4050	416	637	3398057	1385149	232673	1160	415	30635	861498	41166	122	47306	1972	12243	188786	1173	334770	812	374180	84305	75813	2333	68447	36	316	2248461	85276	960763
ATB-j3-exp3-ileon_274	180	34	27	287	20091	14607	182	2211	28276	349	15152	111265	206182	3481810	9	3781	33	34967	35583329	522438	1131	801	1626	2505367	1781015	843044	1001	111652	49566	1037925	90220	516	6583	845	6919	297843	2493	395148	313	681183	5244	169729	103490	2747291	27	469	2631498	173139	776170
Nacl-j7-exp2-ileon_293	45422	26	1693	855	22586	32474	961	2182	12575	1003	16998	540447	173038	9827163	1055	25206	62	39906	80258538	182545	195338	602	1321	680492	2567082	459383	17644	1082062	55867	1403967	432252	208	2356530	4221	227040	392946	1605	606148	79377	274199	2606315	346265	259701	6454428	41225	114413	2096298	1252627	384061
AKKERMANSIA-j14-exp3-ileon_330	103757	36	1501	1364	62206	34794	543	5931	13421	298	102966	586231	139131	10342904	2160	9363	399	92611	110299283	132322	1829170	1490	1169	2213553	1772274	1925275	29314	514642	49198	758997	416517	348	5677197	8513	179086	318211	1951	371091	318038	1134609	5564787	373734	433378	6109280	482	110814	1702203	785923	395049
BURKO-j14-exp2-ileon_323	649445	40	395	1214	96028	20426	1058	11010	25745	995	18126	719828	275689	8954672	3709	179052	79	234469	88961208	152943	1292986	589	2643	1048376	1148830	435318	23944	2558118	68237	962707	543397	172	12405497	2564	42876	241022	1123	411673	390043	521586	10423631	96745	416915	3329721	35366	3952	1988689	1244197	741462
FECES-j7-exp3-ileon_306	16033	19	294	788	28682	72917	455	5405	16940	410	41905	73259	99858	9466222	505	8617	186	56412	102339495	84475	1116802	650	671	5313712	1918137	660143	17146	53271	52121	711964	224371	396	5047009	647	69951	332620	3071	343097	225057	415554	895507	351541	142016	476132	142	4377	1568016	615460	670786
BURKO-j7-exp2-ileon_304	8792	7	999	912	17418	29372	1038	3539	11442	18607	19164	29780	74288	4653612	351	31699	53	5343	89391163	24301	54426	392	677	1735701	1435056	795101	2910	18307	46716	850629	189371	94	348528	2114	75254	286979	1190	372733	73184	246267	1095741	91027	12155	303541	289	29570	1329977	460219	318591
ATB-j14-exp3-ileon_315	778	4	4	161	7613	6227	222	1055	37407	191	10090	875	40382	1775055	3	3484	6	2641	444016	26441	1537	840	563	2065741	1234962	1136146	396	146	34996	760033	30060	403	13036	1056	8663	296295	1875	347432	367	614410	21356	68590	5352	226104	7	774	4047112	64103	606492
Nacl-j7-exp3-ileon_294	856110	57	3471	5967	134637	13556	202	20393	5881	570	163203	642090	106676	15811134	18993	60901	443	318331	73175037	28198	1005282	2111	1036	442303	151996	11688240	69252	2561835	80388	1264733	566538	390	3824768	206830	20855	522122	6556	537173	412563	1562154	6051867	199194	758090	6803638	28171	352675	9283414	316938	143640
BURKO-j3-exp2-ileon_279	3588	11	1669	1160	33408	34821	1772	9183	19185	926	12896	6225	191260	3841707	189	179221	63	4896	719148	269755	42158	362	679	556868	2056504	224654	4033	4944	49042	1210902	79818	164	1049369	3671	50943	333750	1489	440223	8837	304438	280301	137677	4103	158600	24	946	2201450	933540	729587
AKKERMANSIA-j3-exp3-ileon_285	396	6	834	507	71362	21665	323	8583	22037	237	22596	54366	93298	4430916	330	11712	125	66856	26824411	150737	355977	621	842	360458	1098260	357581	528	45552	38949	1262991	70957	361	3961088	3089	3332	348512	3326	458732	42711	434585	205493	122817	89857	1266803	27	660	3769514	241985	841217
Nacl-j3-exp2-ileon_269	112138	723	42614	19048	324904	8609	994	3211	3876	774	8301	8941	7015	1184801	3496	299750	72	73	2844577	299	1439497	773	10129	2328417	24718	1610325	6680	3620	75389	827766	172835	179	2300771	1620675	43497	275931	5793	378453	264523	649807	1354400	12445	62	61168	58	3181750	1820263	54781	75814
ATB-j7-exp3-ileon_295	95	3	21	145	12662	12314	212	917	39677	233	10405	7605	67900	1923754	8	3968	10	15216	316981	68516	1291	371	684	2213357	1442398	123674	425	2104	35636	1409568	22805	389	9406	1256	14337	412077	2628	485734	168	283520	6433	135808	14730	345659	104	420	9220968	68340	681104
ATB-j3-exp2-ileon_273	1796	3	128	509	11602	10146	657	6072	22530	581	7651	476	5614	1853105	27	7299	52	85	503971	501	4082	713	339	2958950	662084	1492680	236	585	27446	1053621	19432	88	33672	2098	2123	279038	933	405838	2209	592067	66821	40942	53	5633	26	1496	3177031	79272	534798
FECES-j14-exp3-ileon_319	1342945	36	1232	964	38203	30399	302	9283	20931	636	13755	473091	254701	13547317	29010	38161	100	133395	50803861	215077	1407682	331	1599	921651	1964370	558373	31377	2675515	41802	763807	498310	677	10213035	36519	43918	354475	3967	376767	506115	258263	15585248	258154	484316	3399391	4267	733006	1994027	943351	263194
MITSUAKI-j3-exp2-ileon_285	7604	9	314	582	27205	13874	738	4141	14103	237	7289	360	23572	1840465	1688	42001	36	158	241014	996	118895	773	373	1080657	729995	291404	590	1397	83861	1472439	28666	118	977589	5010	11158	383749	2724	506640	39299	480276	2588661	117690	147	94157	43	2392	4267056	166964	428305
Nacl-j3-exp3-ileon_265	1354058	84	1659	4257	18992	17722	487	8378	7631	431	14973	212105	115691	8806771	35141	29119	106	140571	63650323	50730	1549232	829	1394	949379	462647	2032782	15477	1314118	63274	758482	400858	547	8319317	37364	14279	291328	2270	344251	575566	796424	18327331	35799	454401	1426355	511	1213153	1835883	323970	226454
BURKO-j7-exp2-ileon_303	17690	41	463	708	21062	29640	906	3162	30048	1813	32241	122991	197204	6074874	858	34139	160	42072	90597049	234411	61066	543	994	4459387	2269226	474774	11667	93755	54659	1002129	241089	217	560386	3391	118089	333498	2016	427350	50985	550753	1577524	258464	123133	6177996	32	4715	3334436	629875	495998
ATB-j7-exp2-ileon_297	1091	8	16	230	8952	3166	420	818	17408	343	8651	473	5725	884758	47	5864	19	602	115814	267	7687	551	475	13951287	733296	238996	440	358	17181	1347943	12526	138	49216	363	2209	385094	898	484614	2907	378495	186784	39786	208	18420	72	1390	3381963	74247	394232
ATB-j14-exp3-ileon_318	521	7	238	764	103770	19637	268	4149	21003	632	46956	248072	69985	5901734	46	4338	124	53083	37678868	54375	745	1877	923	1449740	998035	631482	4893	296586	48611	789761	124198	372	9195	3433	19480	341812	3759	395227	275	1225990	9619	667631	95713	8143881	78	844	2459333	58704	486161
MITSUAKI-j14-exp2-ileon_328	336932	31	758	1677	19264	40168	835	13116	9249	10199	28089	118543	362360	8936360	35288	32577	138	137796	92359159	206132	1808757	734	3463	1744044	1074791	2919516	16908	318758	135484	764905	574146	172	6723120	1918	34069	277810	1744	429090	994162	681608	19120384	126410	66451	4797252	162	1910824	3190591	715776	376434
AKKERMANSIA-j7-exp3-ileon_311	10708	9	456	708	24208	18939	321	4503	26210	676	31892	386279	157167	9150134	747	8928	122	68886	92948830	128084	666703	1741	1887	5453981	665226	1722144	24382	860849	67510	729233	155388	527	5242814	987	19145	265678	2408	368690	81624	1188055	705443	134920	345253	7788445	16525	760	2587084	269251	407287
BURKO-j14-exp2-ileon_322	593462	38	315	523	37040	13630	466	3648	10544	920	17672	28945	51866	4236898	4609	77010	56	158033	536589	33726	1349270	595	945	349782	510410	790352	4946	22772	48909	788720	148114	246	12882155	564	30746	247828	1001	378941	406676	561733	17192875	49141	67249	193334	233	2465	1796280	528783	948224
FECES-j3-exp3-ileon_277	1144	6	16	230	12556	6668	274	1280	14747	280	21826	4194	22430	1889140	243	5971	59	45042	235763	23956	1051197	608	533	1247187	961284	288712	616	2510	23401	1529350	33971	420	6612179	418	2859	480343	1552	569706	98433	511312	287580	50347	23813	46093	27	1065	4002254	138517	612618
ATB-j7-exp2-ileon_298	1197	4	10	256	8212	4703	676	1991	18320	365	6435	745	1776	481502	248	7032	13	108	327248	381	6189	796	563	4817187	755638	106762	227	467	15689	1238552	8647	113	103140	188	2962	352499	947	448136	3561	339515	206096	147681	34	1807	61	741	1786479	81165	311403
ATB-j14-exp2-ileon_316	5365	9	17	231	7055	3090	350	2219	12362	144	6262	1053	4279	707961	86	8036	37	3957	52854	287	19883	449	260	2472263	847876	167002	218	242	19054	793541	9889	120	205182	1900	905	216696	896	341973	5713	259751	271934	32500	133	18370	81	9491	1836569	72569	339367
ATB-j7-exp3-ileon_300	134	10	170	1412	87342	11620	287	6534	21780	962	150787	443903	92001	12069604	5	4835	346	82100	84336569	44223	2988	3048	768	1898039	1278198	2495258	17555	607636	49260	1310471	258987	344	28293	2046	4448	384707	2875	470245	503	1890894	7717	496597	231019	14348519	53	887	2441757	146581	423540
Nacl-j7-exp2-ileon_291	428913	62	2248	3309	45067	35610	861	6377	8988	3196	25942	119295	111440	10480413	5073	65025	211	194063	109553973	29633	1143114	838	1248	698644	1379231	2445737	31574	90347	65849	1087401	450389	221	5679870	8991	82756	385934	3294	446312	411328	674665	9459363	154198	238457	332969	167	388964	2048055	1002454	325374
Nacl-j7-exp3-ileon_293	1033822	127	3385	2311	64338	16699	319	6766	6948	925	12336	415838	135929	15691202	13861	79432	141	106558	64784711	54846	692141	1392	1633	430396	226565	1801639	90245	2878689	68644	1095746	388863	463	1911066	198868	6284	360123	3211	474546	153842	961384	4141770	131152	743876	700886	33656	463067	7041993	348627	106249
FECES-j14-exp3-ileon_320	364278	39	1156	1873	68028	68670	502	4199	17761	2269	52272	101167	270545	9762919	3325	26048	220	234990	77830238	408380	1191648	787	4199	1190720	2386607	1729849	28366	134980	74026	711224	525611	500	10527074	5759	47272	298009	2915	364198	608527	622613	15161155	231860	436639	2484619	236	543307	1782724	1038795	310899
ATB-j3-exp2-ileon_272	2125	7	22	501	7353	17033	524	3724	17078	903	9489	705	9692	1178947	1105	6728	64	3464	298825	3079	21685	526	559	23512755	957378	607224	561	363	17731	996422	18168	191	285513	397	4069	282528	784	403656	11272	469536	1080490	43045	226	4508	94	1797	2089190	108350	533400
ATB-j3-exp3-ileon_276	941	30	31	523	15263	26990	362	2455	11897	563	18295	8661	56590	2743028	17	4132	58	31818	695803	42233	1730	590	1242	2180229	2045091	535970	890	6262	31361	990033	45145	419	7368	333	69707	347912	2188	360143	563	194121	26671	96742	4445	78716	3	1019	3556376	208320	465389
BURKO-j14-exp2-ileon_321	466746	40	308	1181	63941	23456	577	21101	12642	970	67773	64608	141893	8569337	5228	73521	125	256145	102939722	53313	1400809	1223	1085	240281	241392	913778	8903	111834	53172	876712	258894	337	12908357	8033	12234	249032	1010	407661	486771	1258819	13123671	162796	146497	1568190	65	1605	2559304	291620	661749
MITSUAKI-j14-exp2-ileon_329	60033	21	15	223	18564	28891	699	4470	11502	1277	19863	33029	42638	6511897	6184	32574	46	103561	78765926	10317	784137	799	618	670295	560696	1028933	6150	44498	118808	740657	118874	428	5262620	305	5131	246902	3154	377314	487116	712848	9837256	68065	32153	283160	67	250363	1807933	236066	375159
AKKERMANSIA-j3-exp3-ileon_288	1651	42	5154	1537	97145	22737	505	7723	15605	514	38153	114000	83945	7245865	291	26761	121	239348	49812092	67751	313120	1394	677	401160	1570285	689222	1389	68600	43097	1175262	127787	392	4820564	3098	14453	395580	3004	439569	75070	998584	577954	217677	205451	3551835	29	928	2978902	345980	979427
FECES-j3-exp3-ileon_282	1649	24	316	817	13461	7320	344	6455	16031	339	18049	100	21582	4807367	71	10424	25	642	34202243	414	712905	1273	467	283963	569807	2404095	553	2671	27849	1233763	34738	429	5738335	667	4218	396372	2771	427447	80056	914178	489093	45459	967	62328	93	1053	2994147	144958	512479
MITSUAKI-j3-exp2-ileon_288	21375	12	227	587	15820	17484	855	6030	10724	5119	12800	444	4754	3172748	2337	60392	64	103	1066598	849	228686	853	256	8478195	1087739	569029	3501	1293	35442	1005156	38607	207	2704756	2106	15778	300081	1540	432977	26673	653665	2579327	56450	51	16960	72	877	1874698	281593	455345
ATB-j14-exp3-ileon_313	457	16	80	162	15137	9018	241	921	33415	242	9978	35	46454	1496437	25	4338	67	3816	262056	52790	1858	715	974	1811409	1224138	205129	449	281	35106	803435	28943	365	14036	1573	2999	275299	2119	345381	663	398064	26387	80198	4540	167378	46	919	3173392	72247	589699
ATB-j3-exp2-ileon_276	6661	34	106	305	15140	7170	490	2194	19896	324	11026	242	24321	1627121	304	8229	18	2382	112687	2852	8268	633	232	3408850	879102	356257	166	523	45528	909265	34812	216	112090	4744	1632	264741	2160	402277	3027	587311	228591	85449	338	64784	30	4361	1693275	79240	699581
AKKERMANSIA-j7-exp3-ileon_312	10309	20	700	647	35070	12737	286	3844	19279	505	47690	55231	43790	5299716	1351	19333	119	90843	66877454	29900	2608776	1789	1161	2701928	475771	1522345	2028	24021	47396	788944	119901	561	16780530	3993	13447	231855	2077	347832	543221	1205620	1498910	59195	222093	2317131	48	9691	2222996	252452	440315
BURKO-j3-exp2-ileon_282	32138	12	207	579	17336	9999	898	3145	8379	756	7568	149	6390	2139329	2244	75948	48	36	448278	354	158339	381	422	294445	804219	231178	478	240	25803	1237014	31499	301	2670286	473	18038	398179	1159	516649	20808	267347	3679389	25402	102	12169	59	12989	2280229	371475	265732
FECES-j14-exp3-ileon_321	1654091	75	1497	1355	80391	35508	282	11952	10531	856	31745	266960	384177	10097179	22660	51214	212	188127	54796841	530806	1619518	1087	4372	633349	1468188	2920186	11678	423913	38480	761179	746274	684	10297946	24163	57804	341465	2808	398135	299020	597955	11885430	284544	300495	2655802	247	620353	3582276	1086110	248500
Nacl-j7-exp2-ileon_292	692709	75	3064	4693	28408	14970	779	6795	5553	5850	11220	32367	61080	4630886	13470	64964	131	59057	71522748	16793	1390729	693	695	525634	500426	870164	6235	10548	65959	1286100	260586	298	5745756	13771	25875	356607	2658	481726	506760	327794	13289219	37739	86569	103739	163	637199	2975942	516620	184828
MITSUAKI-j7-exp2-ileon_311	1054863	39	349	628	17297	11708	593	13090	14639	800	6564	39199	46632	4377562	46967	84390	88	71076	67002710	5009	849769	828	2167	268322	217745	208064	13638	33146	42957	847347	411137	295	12343586	3308	9492	290072	1776	376210	210604	822994	14913358	56274	50431	305003	189	624862	3546844	384759	249683
MITSUAKI-j14-exp2-ileon_327	133739	118	733	1447	125978	156531	1211	12619	16913	21421	138414	658447	124058	20300876	6099	13548	1001	178338	219446470	36556	700251	2216	725	3891876	474751	11055023	110337	1978301	79588	674410	538116	257	2894254	3224	7608	333045	3714	387411	479077	2407989	10146512	271232	539581	20929838	22423	1153284	809182	169652	192132
ATB-j7-exp2-ileon_296	310	6	52	333	8183	6845	584	1279	24821	1883	14308	1995	44683	1543977	46	6395	62	28325	58776	24526	2269	406	619	3676838	1200299	230252	323	792	27343	1509087	28504	272	28362	497	2714	388910	1198	530828	869	251965	38262	62994	6691	74179	66	884	3889063	94024	683549
BURKO-j7-exp2-ileon_302	30440	32	3595	2197	23722	14074	1620	2968	10803	1923	17503	6750	36322	4083893	2700	54762	135	9584	43081621	3664	192725	698	630	33130819	562857	425934	19006	11674	62631	765452	95023	264	1613371	1912	30805	243221	1752	380186	141970	383481	5404080	28706	6975	432032	114	47546	3162408	359811	231904
HIRAE-j14-exp1-ileon_403	1111448	11	131	375	9769	13171	581	2042	7307	942	14194	59715	48894	2875252	37514	37999	35	16904	34110490	13691	2193931	445	481	2880850	484016	848611	12102	41920	47118	577349	115544	371	10165052	499	56060	210385	388	290428	754763	321402	20372221	31570	27667	898444	22	641957	2608727	165394	228236
Nacl-j7-exp2-ileon_290	192504	33	809	1136	21536	22781	1015	2573	12518	2495	15944	89245	192393	10172785	5479	23056	95	39462	70429276	85943	560671	532	1375	958815	2311552	388543	3824	71282	75782	1508394	245826	331	3245461	2646	190580	426591	2187	597542	256062	212092	5384375	310628	117771	2247339	88	124264	5981297	1029401	380839
ATB-j7-exp1-ileon_375	208	14	41	365	29238	9488	406	2338	13570	289	46020	24422	19548	4060818	36	2762	89	10099	1146450	1863	973	1288	267	1184541	631580	1202534	590	9553	20177	703864	48202	135	8095	688	3715	220274	864	286958	800	1349649	15429	295936	4105	602051	12	613	1548125	45319	362246
ATB-j7-exp2-ileon_299	1028	11	21	226	6265	4443	598	889	17080	195	6250	1005	13912	947675	530	6718	37	14493	80687	6244	13163	407	328	27991514	713348	86260	731	892	19198	1388856	16859	255	80735	193	575	392775	1503	526067	3141	198546	387170	42189	1575	10308	66	407	2611858	66964	530980
HIRAE-j14-exp1-ileon_407	373045	24	194	393	38409	17301	333	1905	16305	447	13369	113860	14445	6607867	14908	39581	136	115580	56740676	3969	1227198	590	1133	362322	105551	699181	50919	373543	73830	836198	297106	335	11038180	4891	26474	270797	594	330073	465577	522374	9355041	97770	89816	503426	2551	290814	4184499	89475	120227
BURKO-j3-exp2-ileon_278	3273	5	665	787	28634	16640	946	3745	19674	1595	20175	3679	25093	2859679	409	107412	60	3145	384217	1153	31389	809	959	2296220	1111336	279205	2799	2343	31864	1199284	41966	171	292996	2374	1093	309427	2073	400683	7843	680491	224404	141062	389	48255	134	2389	2006862	475607	583495
Nacl-j7-exp1-ileon_367	1887568	74	1922	3222	25481	19873	587	4368	4528	180	8706	155014	55214	6325581	30603	25238	185	50652	69078389	5387	1253946	495	630	281080	387434	490538	16653	393479	41954	919370	250994	287	6936890	19857	35192	302146	905	366534	254258	495211	13999259	36916	68471	906098	14360	593771	2894046	491669	117262
Nacl-j3-exp2-ileon_268	295039	42	297	534	20516	20122	683	3108	7418	7490	23015	61276	58497	7286861	10101	28004	175	89800	96350403	15592	1146311	998	796	1104604	801531	2095824	4722	52059	39111	911141	241974	295	7148674	2579	11909	291319	1751	469208	519350	1066899	12449106	155938	94655	885936	184	270122	1982700	260993	230267
FRAGILIS-j7-exp1-ileon_389	156971	8	8	233	13976	4538	253	2569	4602	574	12237	58773	25635	6024683	5802	2449	18	16168	74949022	5486	362222	630	788	2024556	84217	620229	37116	243859	12118	760112	63084	385	5864505	366	3006	236095	621	351651	236434	497712	12603006	58378	123092	2233308	5110	1307667	2512741	50724	196833
MITSUAKI-j3-exp2-ileon_284	23156	13	65	434	8500	11283	546	3786	9776	595	9220	1011	52159	1904116	1490	23836	45	942	217259	8735	342790	725	540	2197187	1243620	965893	1196	2595	67657	1331436	25292	298	3935074	788	2664	409197	1270	514993	44453	562447	3433160	43161	124	26407	15	7617	3444317	285573	605836
BURKO-j7-exp2-ileon_306	5209	2	250	750	21308	19621	1058	4639	8744	13143	36284	670	27625	3455312	522	61284	45	913	39094284	674	76610	760	656	1185150	444396	2577324	6049	7221	34582	859999	71886	227	450767	667	25457	357118	2373	387808	26600	637527	1358030	49304	61	46819	196	14927	2097752	667245	224017
ATB-j14-exp1-ileon_400	420	1	6	218	9018	5174	243	1311	10066	106	8537	2701	17802	1276186	38	3376	49	10620	174711	2499	1640	527	430	1531442	772621	773325	442	1240	20518	737809	17210	86	10706	196	311	252934	743	342887	628	481554	23488	70761	1152	20472	54	1100	1525498	64206	370658
ATB-j14-exp2-ileon_314	917	9	16	645	16227	6021	507	4766	15555	1212	15535	325	1623	1421977	129	6485	37	4323	629963	391	5204	1029	94	2504317	487292	1769171	358	1241	36133	1024277	12247	112	38969	220	3810	323120	1362	394755	2119	1212693	68364	56358	78	821	227	1104	2396923	70195	361132
FRAGILIS-j7-exp1-ileon_385	565810	10	27	191	17913	11978	248	3336	10558	183	9022	19820	54116	2463890	12341	51361	92	60164	680268	17547	976040	379	2008	638929	922941	519287	10972	7106	11585	614230	148067	189	11851398	340	18404	255301	504	287650	220168	286200	13202866	74792	20657	158227	1166	388394	2961505	404362	216024
ATB-j3-exp1-ileon_343	531	15	11	128	9449	5662	201	1204	27527	313	5280	62	8983	1407002	12	2503	49	261	195191	619	1761	442	501	1805557	661368	157327	174	390	12263	1119247	4860	238	13481	490	5922	346501	814	338016	704	150824	30288	64090	71	39872	22	569	5642827	77608	317811
MITSUAKI-j7-exp2-ileon_308	485898	18	131	578	10812	12824	633	6032	5492	1422	4742	18835	13784	4404666	16914	61748	26	15823	55307058	1427	370004	601	721	212833	208080	2408198	1688	17185	49919	890188	115235	241	5387748	3176	9034	341002	2072	413155	220481	558843	10270627	41331	12240	58453	268	627823	2459196	144887	162168
BARNECIELA-j14-exp1-ileon_415	682394	25	167	324	9921	11659	321	1876	11708	214	8358	13867	40212	2790985	29327	27561	128	9746	3396345	5263	923700	488	483	15376802	964943	486843	16173	5820	42524	566836	90366	284	5638823	10361	96371	210794	817	280388	433960	416935	13038809	31916	3800	139181	54	433947	1255967	383041	243927
ATB-j14-exp2-ileon_315	167	11	28	186	6490	10219	409	2301	18090	316	4529	446	42706	881605	5	5844	120	896	68858	14805	581	564	326	1636237	937488	119444	1113	81	39973	1026139	19934	112	6268	881	5080	283901	2307	387806	111	310052	10105	45083	368	82750	2	315	4854678	94323	387342
ATB-j3-exp1-ileon_347	474	8	1	80	7011	4341	214	937	15363	310	4514	91	5179	1053718	71	2625	30	53	112063	336	2202	246	183	2067672	764467	533745	549	202	21042	964993	13443	138	16640	214	2606	292970	669	365837	719	224242	43233	42050	34	36175	14	795	3205800	72616	297665
BURKO-j14-exp2-ileon_320	57018	12	461	424	59355	9402	522	2215	25113	451	18977	2051	34454	3310334	1635	37018	50	4199	82905019	2927	126229	1211	966	30959571	1300704	655676	7185	5145	55987	924452	142626	243	1154086	2058	45358	241493	2043	385605	38398	799493	2773713	45202	20164	322664	104	614	2090192	1096875	393730
ATB-j7-exp1-ileon_377	961	10	13	62	6768	4936	207	548	18666	225	4626	5	19676	770603	17	3113	53	218	48304	1756	3708	707	194	1554839	465720	223234	321	108	13362	726176	12278	95	26201	479	1764	217915	795	281843	725	291577	79069	39015	28	77231	78	3882	3301810	44565	453083
MITSUAKI-j14-exp2-ileon_326	280757	31	601	1489	10906	6485	532	8746	25695	120	12904	1736	21455	3287168	67677	42949	157	3047	15627361	720	1184976	595	514	66243788	525183	509955	59858	6907	75440	711301	91280	330	4454333	1824	8683	264239	1804	384629	668964	460239	14875113	32235	1355	57889	30	816461	2558913	203140	335068
ATB-j3-exp2-ileon_275	694	14	27	590	12356	7111	496	4535	13874	284	10522	452	9932	1635381	87	7225	62	2458	250701	719	5318	596	228	5480073	812720	233509	566	230	23879	1115065	23577	182	27355	669	1075	283327	1350	397777	1232	238413	78346	43894	88	17391	130	1426	1750043	82587	501705
BARNECIELA-j3-exp1-ileon_361	1844	12	248	261	28898	31883	195	925	12351	287	18761	19447	144350	6337371	284	5703	87	9231	77077330	240642	6673	359	1182	1508575	1857642	489189	1160	16548	23208	1433351	100694	161	98124	357	104330	417137	560	442918	1174	278055	271256	208104	53692	708112	174	406	4130344	362660	619679
BURKO-j7-exp2-ileon_301	9032	46	3476	2296	62360	42974	1731	4912	11042	4585	32311	559	8518	2776250	1238	121721	110	331	1124501	607	66027	838	319	15064224	746391	1156244	8658	1363	50605	834296	60089	202	606986	1306	45962	320016	2635	367184	64092	877959	2519622	54218	429	18730	21	26755	1216188	303830	269760
HIRAE-j3-exp1-ileon_353	170	6	705	357	14493	12234	256	3105	15448	175	6585	14	9885	2798565	103	30575	19	83	1434502	370	1354	905	372	1886443	425693	793395	182	372	12173	1050863	13061	262	7336	1027	10536	318191	1359	346619	1125	525415	176063	28291	35	78328	57	469	4118759	134294	274463
ATB-j7-exp2-ileon_300	13154	18	42	423	8339	4565	731	4509	18420	436	8000	469	6809	1465375	471	8308	75	265	166850	1310	21854	335	374	6906181	854691	321386	485	273	20554	1140733	28776	265	116583	1452	795	286761	1891	402203	12323	402427	470697	47639	148	10662	57	27198	2186620	86721	588707
ATB-j14-exp1-ileon_398	109	4	24	230	12329	9224	269	1720	17185	543	9524	93	31561	1524864	144	2573	103	5298	242237	10529	1046	902	675	2454317	1354276	236485	832	407	22723	972456	32082	104	13239	150	8976	295813	996	296104	694	308349	17260	61772	1073	23188	182	434	1741127	89403	674849
Nacl-j7-exp2-ileon_289	174821	16	471	544	21182	26540	731	1488	15943	8595	21480	32655	546119	5364377	6116	20612	143	73548	98910015	673608	740499	285	5102	14106126	2582863	273773	5739	19206	62032	1446755	190076	299	3434105	3601	125277	423946	1841	588257	311812	251709	8576853	119777	173469	757969	103	315476	3578740	1478525	611059
BARNECIELA-j3-exp1-ileon_363	1541	24	124	220	12717	16648	240	856	9164	646	9082	219	2098	2555561	127	5756	97	263	1111734	2306	4246	367	99	1145322	1091998	156357	600	1559	28213	1333750	50663	209	29600	163	53686	415550	840	416317	1457	91067	95114	100258	263	49908	169	479	2619400	309274	328973
BURKO-j3-exp2-ileon_277	14582	12	444	457	24630	18134	1270	2584	17157	2452	7839	649	14452	2475319	1393	119573	94	68	128026	735	94126	342	311	253051	909925	346541	1787	549	42782	1529791	32904	279	1456372	2217	101108	427056	1676	556215	17051	256287	2445472	55499	168	12707	70	3692	3551499	363303	328906
Nacl-j3-exp2-ileon_265	855891	75	2635	2505	42311	17682	882	14491	6811	9023	14794	64969	217170	8438697	38097	105962	188	104094	97781992	56533	1447835	979	2228	513068	851067	851188	14058	49672	71061	1104239	582294	290	5212475	140155	20798	320528	3161	533811	435218	567097	14574977	64949	203604	318367	71	970251	2178251	1023459	228240
HIRAE-j7-exp1-ileon_381	1346613	6	50	111	10781	15484	102	1454	10021	433	9411	31161	47166	4421235	22293	8350	67	27119	268228	25350	840381	239	199	644198	1646480	190998	5490	16991	24245	594384	69847	198	9599703	257	132413	246160	1158	261394	284112	128374	17799745	68653	16649	649398	1949	624433	1654898	453763	268545
ATB-j3-exp2-ileon_271	642	9	3	190	8510	5221	541	1036	22211	633	12956	5477	55136	1696091	37	6606	40	25213	220797	8377	3823	395	714	3283582	1394459	214503	540	886	34870	1169982	26123	202	24121	194	1723	289508	1892	424417	1180	413491	38788	44225	4762	105289	124	1071	4293815	139699	591810
Nacl-j3-exp2-ileon_267	66044	50	723	466	25416	34473	644	1478	23694	311	18379	79773	331579	9620476	2802	16939	135	98975	74761885	164143	288210	445	2233	2399968	4336934	616930	13357	48274	64041	1150148	482458	366	1581825	1976	NA	296315	1400	439008	63022	320829	2046199	458745	184149	2450537	210	31880	2571497	1170504	722162
MITSUAKI-j3-exp2-ileon_283	19783	21	238	738	23673	22395	693	6400	20224	3348	13461	585	21964	3674826	1371	48566	131	823	1008629	1018	226662	604	576	6165559	1930975	483119	2150	2397	49446	1478182	40854	240	3044486	1595	8518	414795	3161	509317	33873	358285	1952220	130315	174	73490	98	896	2925079	580888	583926
HIRAE-j7-exp1-ileon_383	1621390	7	60	67	19339	8807	198	1177	5832	330	9067	41634	64626	6383077	36584	8840	95	44192	64944283	13857	632230	1345	738	181479	171130	1354039	28671	93056	20495	949684	88108	297	14512189	731	664	250082	953	324563	243433	913452	18809416	79503	68144	1908341	4878	932151	2486338	186394	119008
FRAGILIS-j3-exp1-ileon_357	1683	16	6594	418	74333	20521	360	1018	9157	251	16609	12608	28902	3141316	14	6909	137	10286	245211	4200	43214	441	137	1599622	1018685	369911	198	2998	15711	1227090	30191	294	287669	750	47419	411119	878	375780	2669	427134	89256	86811	1388	201080	106	1969	3463844	197827	365618
ATB-j7-exp2-ileon_295	433	2	18	262	6582	13909	507	1105	11844	358	8526	264	118952	1279041	23	5549	40	5415	173327	28380	3048	576	344	10339551	1513188	161151	1125	133	27426	1309072	3706	328	16468	323	1389	394890	1480	483295	835	157440	72374	28643	200	201539	75	734	5653224	164629	708242
Nacl-j3-exp1-ileon_337	1530705	2	1111	1058	34087	6258	231	3135	4453	211	4692	46008	43105	4119733	23539	44441	106	77254	62096600	6676	2134469	602	628	297932	165498	842892	7378	29048	39310	970287	257480	275	10207962	28231	22248	344635	1184	372759	532236	486523	14938877	19622	82453	37544	24741	1024432	3659398	294440	65900
BURKO-j14-exp2-ileon_319	213856	41	112	433	13511	17122	491	1904	10269	4469	13245	1229	28717	3705646	1655	59121	58	2839	594661	1516	468037	298	599	6984932	837454	423894	6420	4999	60925	842906	48925	341	5235607	509	25641	277522	1575	352822	201514	331634	9754419	43016	615	121019	143	3545	3579463	425216	377915
Nacl-j3-exp2-ileon_270	254624	108	5999	6923	198736	47078	949	10594	11264	3689	338449	475996	94584	21918594	10725	59545	1351	145672	190045930	7676	377386	3365	801	419004	667827	4862249	44064	461309	65360	837189	586706	269	2820362	27657	44529	260376	2090	424857	155713	3210185	5699386	482201	332465	16920981	36890	241640	2613287	644983	164899
ATB-j14-exp2-ileon_318	794	4	35	346	5120	3291	496	4792	10230	913	7322	1251	14280	940553	43	6824	44	16315	56659	2113	1769	426	239	2144396	651998	230129	939	816	21486	885119	16753	234	16654	636	1616	244092	1038	364503	545	170910	35787	15953	584	15268	30	324	2157604	68770	386795
FRAGILIS-j7-exp1-ileon_390	643830	6	38	206	38253	15073	169	4004	5198	413	29455	134010	65420	11302716	11249	6122	79	48915	113509229	5431	574303	1844	743	2557375	142416	2155304	64509	544489	27195	637712	101322	423	10103019	1486	663	231504	1165	333750	173977	1533523	18028877	172035	181622	4954322	21698	1641366	1766845	124419	102104
MITSUAKI-j14-exp2-ileon_325	169332	98	1227	1494	13272	13909	976	2925	14256	1258	24533	29047	55050	6039665	36012	23543	108	34452	62054410	12044	784865	552	626	40970563	1847997	302014	8156	26004	84954	759631	179378	358	4133550	1992	27624	239159	2003	397905	583078	371370	11264352	93761	27494	1087523	261	663162	3500185	428348	397949
BARNECIELA-j14-exp1-ileon_420	329644	13	28	338	16567	13085	335	2154	10374	759	8197	84740	41243	6105548	19408	20647	100	36537	73265442	4536	604119	774	629	123809	185565	518801	20428	337608	23953	511045	142670	184	5789070	2224	26065	213492	1948	303801	401999	457978	7870284	66630	104715	2473151	7492	401417	1571699	161594	139667
FRAGILIS-j3-exp1-ileon_358	23457	9	114	104	18215	11719	183	633	25733	375	15734	5200	39546	2345378	802	11944	121	22429	208321	5412	1935950	362	516	159346	254838	241080	1770	1846	16533	1412636	15600	327	13989065	201	8669	421148	694	498651	179603	312929	1989868	50805	523	112413	1834	15837	8123274	138359	465001
MITSUAKI-j3-exp2-ileon_287	27833	35	318	652	18771	12654	575	5913	14332	1060	13230	904	75431	4347292	1639	51839	153	3251	68099808	7039	200750	784	730	3026532	1617199	617180	1836	11705	45270	1248544	100395	344	3476318	2193	2451	359183	2244	509713	24150	628554	1406414	90397	1186	354349	210	2283	2656583	439867	673513
BURKO-j14-exp2-ileon_324	129379	37	397	1023	46241	6553	468	10086	21764	292	11952	7733	105411	3398053	3087	71468	118	13597	71947058	20865	524741	1025	2030	189754	358646	525810	1949	11800	43537	892222	161922	230	5808650	4517	13265	230616	2565	366666	170948	825300	6031114	37063	14098	550112	19	726	2597976	412211	481857
Nacl-j3-exp1-ileon_339	211317	10	258	371	14696	35383	185	1646	9319	687	18343	33962	70657	5207681	5213	10429	92	30487	75815602	33051	507309	430	1229	3625606	1332979	431235	5730	14200	41530	936543	164295	312	2470206	1296	78101	363589	889	358257	185055	334378	7702136	94268	18832	268619	118	167976	2275393	421714	388181
MITSUAKI-j7-exp2-ileon_312	989242	39	326	876	14602	12014	482	6116	10865	4112	9253	10734	42434	2516299	42918	137536	120	47605	22528781	10438	1108609	634	1138	369108	703205	339163	3540	6175	60132	832627	187451	176	11373374	2308	60348	262976	2835	346706	352862	459311	17575620	37012	20014	72559	164	405995	1992937	305333	391935
BURKO-j7-exp2-ileon_305	7124	32	950	1181	27377	11269	839	2224	10315	1485	13949	21753	61743	3163487	1228	109499	217	30381	60497841	14493	65591	754	1320	296678	621112	572458	15477	12800	74060	944643	115541	219	600932	2492	182127	318348	4670	404741	28947	405634	1970943	21672	92250	1265875	25	21739	2564120	449517	262257
Nacl-j7-exp2-ileon_294	820075	95	2781	4770	20804	14714	880	12741	6369	4054	14922	24849	96659	4714206	18009	50671	159	46047	55799469	34484	1178879	358	2306	423016	733759	547772	1776	15816	41742	1286267	320284	414	4041554	25673	32774	343824	2264	471208	549093	243712	14805603	28498	66930	117875	56	1259335	2742446	946854	206403
ATB-j3-exp1-ileon_345	1151	8	11	97	11901	6626	141	1594	8914	350	5740	36	2782	2005542	241	2809	46	1117	569380	789	13831	507	61	7680204	1114740	600620	822	2050	17704	886276	17880	163	138610	167	1361	298007	640	331399	2891	268127	487223	24957	41	24518	106	693	2167672	125261	329906
MITSUAKI-j7-exp2-ileon_307	1263927	37	510	1258	37875	23236	726	6049	12036	638	23324	27182	139592	3913668	59040	146341	163	125738	1280776	31509	784816	788	1886	408187	852196	2600967	7651	16701	41269	980664	225251	366	12969034	3538	35972	323920	5165	384878	363096	790582	24692218	117818	39208	131240	134	2514273	1674212	485736	529695
Nacl-j3-exp1-ileon_341	873343	10	183	531	12621	11049	152	1566	5554	1269	8396	25564	27198	5054448	20269	22756	15	36187	1428647	1167	1665957	493	412	372818	318111	768417	2681	18690	24149	898339	37768	175	7238266	4438	16510	327406	962	330334	882798	307365	16927624	70578	2966	69746	58	670845	6235288	266339	79382
ATB-j14-exp2-ileon_313	115	8	44	89	6555	4258	479	1819	33608	134	7943	479	39013	1214882	38	6721	41	7001	19444	2160	620	510	674	1963016	621833	159758	162	127	52092	1074800	776	156	10808	1351	3725	275106	3097	377794	214	490075	8293	33616	348	80512	66	670	8744570	60034	572429
Nacl-j7-exp1-ileon_371	408312	23	538	420	16577	11609	190	2468	5460	307	10340	88	12931	3206455	7582	10612	39	232	708851	645	550404	432	NA	735919	710347	257188	1445	1560	23396	1224332	74293	248	2091933	2189	84066	477665	704	465950	175225	202562	7370189	34365	156	14606	49	197854	3673825	592607	256212
BURKO-j3-exp2-ileon_281	23380	29	1430	1672	36102	20453	991	9269	8787	91	16272	27830	70739	6316036	3520	162991	157	15045	59810867	7602	231929	1151	835	289499	1424064	1200931	2322	17938	63878	1119782	102075	275	3894986	5793	24855	349052	2915	474912	27844	887121	3284620	79010	23041	629322	137	48187	2862220	478327	541533
BARNECIELA-j7-exp1-ileon_393	217560	28	8	24	66232	12755	133	38	7897	467	92377	64634	54492	7711610	11056	956	40	87435	101883547	9261	332352	2078	357	2858083	263462	3114548	9803	62077	25824	752181	165721	181	3780589	18	6198	237238	309	290985	96746	1863652	5928854	281570	94442	4133435	5248	100498	2047608	150800	248361
MITSUAKI-j14-exp2-ileon_330	96707	100	3413	4545	21455	14315	1247	6088	10701	516	61441	71503	48813	7059288	22065	19573	323	45190	124729503	10440	464090	906	655	54416166	522457	1661714	14805	64939	71381	733791	198957	103	2922445	3159	19768	232488	3033	409451	220764	695078	9642318	27170	167059	3428128	99	207217	2226650	160441	281660
FRAGILIS-j7-exp1-ileon_387	983908	9	61	151	9081	8782	201	4669	10748	1104	6607	47057	30093	6268435	15512	16875	20	168038	58839547	1873	1407761	1452	934	149550	107045	2612603	5676	43252	49034	620770	180204	190	13292597	1225	10257	213820	1361	319494	331865	1167043	14101169	41090	27257	73529	1106	1375888	2481120	122013	163262
FRAGILIS-j3-exp1-ileon_359	1514	8	3908	272	43869	17140	285	788	11816	641	7068	5057	23311	3015060	89	7792	91	1553	378508	1936	126389	309	244	1110969	769268	270120	964	4638	29079	1446343	30824	257	1253325	1057	33566	394159	1599	468931	14857	152561	107911	129834	308	75704	164	14847	5227208	103126	263296
HIRAE-j3-exp1-ileon_351	539	15	1415	146	16703	11178	163	1432	16294	450	10812	7440	35200	2366571	220	15602	54	18780	288768	9288	1166	677	468	584388	780997	130503	1147	1179	23928	1296014	23001	181	6344	968	3701	391089	856	413058	3059	302702	245478	71700	5567	173835	226	157	4649171	186827	560424
FRAGILIS-j14-exp1-ileon_412	184933	12	1111	690	22594	9716	300	4760	6102	147	3051	66842	38043	4315007	5112	22073	56	155250	49495178	11122	363835	393	1074	169375	249090	157961	5741	125920	12232	755486	200533	336	1602771	19820	NA	256559	971	351260	138985	180900	2186431	68372	117479	1372940	1549	262329	2051769	306568	130715
ATB-j7-exp1-ileon_373	425	2	6	67	12150	4551	116	606	14460	305	11985	8871	22696	2028095	32	3013	66	25213	295305	1496	2362	961	944	2675520	1074660	575536	1903	8424	24407	696750	20337	214	18183	205	1623	263179	989	303935	927	602434	26795	41550	3723	117689	365	885	2307813	88205	313642
Nacl-j7-exp1-ileon_369	2211210	6	376	313	12818	10803	290	1648	5731	500	7133	35649	45601	5331514	18519	20479	91	20609	454574	4603	1831355	327	697	483767	704847	225128	3116	35654	19262	1123801	87953	139	6927457	3992	88316	339885	777	394715	417799	149877	16591001	55810	18468	297671	285	317399	3057241	612709	240693
FRAGILIS-j3-exp1-ileon_355	4345	8	185	139	8988	5836	87	400	12904	365	6063	98	5126	1400569	264	3974	57	108	221683	555	205790	344	275	5182536	281850	414494	840	230	14127	1176537	15909	266	2212659	739	64723	409921	718	397637	15240	278389	304241	20730	87	12682	99	15249	3719197	88851	366364
ATB-j7-exp1-ileon_374	55	12	1	103	9825	15149	63	588	17690	434	7905	3096	161848	1731148	10	2851	34	30159	243083	160927	1414	230	885	3025553	1947936	123129	1332	2969	20614	723043	27197	242	7819	211	8839	230177	1378	281941	293	128842	14993	55845	3524	263708	85	41	1757887	162646	694430
ATB-j14-exp1-ileon_401	387	14	31	201	13796	9024	241	1010	19849	1284	16285	4	23911	2493138	13	3037	104	676	689123	2865	1681	793	371	1947684	1191495	300322	798	1009	19277	859903	36705	110	19792	244	8948	265865	1446	345461	716	420561	17940	59450	173	74708	71	784	1635347	77691	697883
BARNECIELA-j7-exp1-ileon_394	10913	16	66	282	27746	13030	164	1341	11059	338	24988	12290	61353	2791005	1652	8485	113	31277	502977	6766	59809	1136	677	2099884	223909	2053985	1678	9890	24663	725208	22390	348	110353	139	3676	269835	348	309669	40731	994887	949840	74003	3478	48329	1588	40623	3051702	109406	353486
BARNECIELA-j3-exp1-ileon_364	11409	12	34	425	9167	13177	127	609	7359	232	11820	43	11706	2546438	1776	12649	62	1091	344183	294	80506	407	312	1126306	684196	124513	574	1248	15964	1509599	31435	290	855014	156	70720	464374	1054	473494	6718	109957	1596771	35161	123	37310	80	458	2167437	316940	428251
Nacl-j7-exp1-ileon_370	1379459	32	832	868	24131	14748	165	1867	4487	352	6881	19153	20944	3557144	29974	32263	136	79181	725687	1927	1968245	392	397	355880	319171	126783	2603	7122	35133	1023161	109771	135	9457777	21384	20635	349226	1534	386716	567799	254727	15243487	23348	19551	14230	117	711043	3127233	352689	116589
Nacl-j3-exp1-ileon_340	504091	25	710	807	43551	12043	211	4229	6749	722	10896	38610	25432	5662504	18840	40967	136	164033	60742641	2413	1155798	879	619	437706	302610	722756	3114	26201	51566	949400	221294	195	6856687	14663	33816	366870	899	361065	182576	827216	8816444	74135	55335	119330	4142	332361	2981152	377942	102229
HIRAE-j14-exp1-ileon_408	637059	20	128	349	33792	16408	265	2453	6083	413	13046	130899	21019	6170584	21999	55839	171	43424	65122378	2857	1818165	560	879	430129	584400	594440	17327	153631	29365	701707	342839	337	14500801	3964	64434	241737	935	304498	728027	395682	12635567	109800	88408	410597	110	823541	2320786	333410	152960
HIRAE-j7-exp1-ileon_379	2009040	18	89	203	7452	5134	168	3072	3926	551	3623	10368	56096	1657975	49756	25250	37	10078	212241	10894	710306	660	433	196231	380488	652508	4009	7415	18913	567681	60854	128	13197790	778	19212	213863	620	276381	237296	375825	15348057	19148	5187	244042	677	237711	2709954	296873	143966
FRAGILIS-j14-exp1-ileon_409	952897	12	160	403	13572	36058	177	2712	11337	862	12122	48017	834390	6326358	39754	22506	158	86049	37104864	385205	1674494	475	11601	1242640	2397117	357754	5371	44812	53402	722168	565249	309	6088954	11584	35590	238319	948	304514	546388	283385	14122866	141101	35332	971204	4114	1852306	1710975	2020857	771528
HIRAE-j7-exp1-ileon_382	3220745	30	61	408	47288	13909	229	11585	6113	383	111840	165239	54201	14852909	49538	17152	183	240968	102236603	4318	2725649	2081	584	142358	75705	10488727	64866	614204	32988	583134	366395	341	20682118	1382	16591	201507	1056	317387	921202	2167049	21620060	193536	153835	9058370	8991	482709	1351977	103581	129014
HIRAE-j3-exp1-ileon_352	1268	25	126	242	18703	8310	135	2644	9820	681	14187	9693	14919	3629692	530	9932	79	19959	421602	201	5145	646	368	235665	530873	689303	470	8811	12359	1523570	15120	158	15862	439	611	458300	1076	445475	3567	375743	879992	42339	1218	87090	417	298	4575389	183181	314154
FRAGILIS-j14-exp1-ileon_411	69047	11	209	244	32869	10515	170	2617	6731	192	4836	45	5142	2442570	4083	17345	65	111	380879	179	256119	344	218	176086	212478	231343	763	2321	16062	608467	55826	186	1751454	5624	NA	215586	772	296273	111746	282507	1674105	64810	359	129300	39	167931	1473648	222605	115394
BARNECIELA-j3-exp1-ileon_365	7571	13	200	339	14101	24438	142	1071	8836	2206	12868	136	7203	3530079	851	5729	95	228	1099782	709	11120	332	270	1121311	673480	962770	1277	1691	29000	1292463	32971	238	80247	80	20575	393552	1401	393732	3469	292311	1527621	37493	136	13272	111	351	1661183	280436	495003
Nacl-j3-exp1-ileon_338	117609	25	2399	1406	24562	7735	267	3755	6868	1541	6092	37683	74066	5163529	5395	32282	54	71313	55416223	10724	395847	750	830	380701	470204	596261	395	19706	22848	895068	290529	270	1775854	6995	NA	317570	1234	378031	167400	515536	2514296	69732	38815	326733	42	124905	3788648	471242	97598
ATB-j14-exp1-ileon_399	18983	2	30	192	9729	6048	135	1539	30219	483	7742	178	21775	1818455	274	2958	48	1731	211032	736	17330	762	475	1309362	891877	429222	591	304	19522	842964	1535	136	104004	108	5585	251500	1378	318403	5952	453868	296476	58371	137	280032	36	3513	4224609	72873	393386
HIRAE-j3-exp1-ileon_349	1671	6	594	353	25038	19012	198	1398	8038	320	13735	119	9973	2922862	401	25257	103	337	487519	1054	4511	520	70	1554990	1071801	545449	863	1714	16722	1282747	20839	179	16377	156	8370	437522	1485	419803	3704	238267	1035733	47463	192	53963	269	504	2049023	189952	381293
BARNECIELA-j14-exp1-ileon_419	543810	20	22	371	15255	23497	243	2863	12110	1223	19172	7356	10648	6095671	10652	12818	101	416	865424	433	642436	692	477	312057	682477	1637294	2305	14838	63915	525452	78568	270	10051523	1033	81074	288250	2479	285475	693956	653766	13049237	36794	137	33349	NA	694072	1016055	438706	258380
BARNECIELA-j7-exp1-ileon_395	10094	42	49	74	14924	31770	194	598	16299	1552	15542	41773	19175	9616187	495	7554	124	8707	6354444	6369	31412	452	578	2690199	1678700	242779	2765	44739	56197	778564	136651	318	140118	256	7751	274800	1233	290385	8022	280424	793825	257827	2705	93484	60	1245	1792706	498172	724770
BARNECIELA-j7-exp1-ileon_391	4339	12	800	436	26386	31399	106	4331	10677	475	11502	19222	279481	6449131	244	7795	62	8630	9223246	196509	13248	526	3191	2734671	990721	504636	3588	31594	43368	709774	585738	294	35386	649	14235	247332	722	323635	2318	378458	193460	266412	7554	805662	119	516	3882986	487845	722485
BARNECIELA-j14-exp1-ileon_416	1856582	19	160	535	9176	6746	171	5032	11484	729	11213	2657	10848	2850386	61291	41010	63	2079	340346	336	1448303	813	339	315878	622882	1360519	12631	4392	40530	535405	49555	309	10209672	1773	27498	216288	1017	279557	806693	584808	22285321	16331	125	60999	144	806949	1196693	334133	424355
ATB-j7-exp1-ileon_376	54	12	44	123	8625	5879	138	2567	26501	255	7802	59	22571	1554292	19	3684	50	3670	95589	2185	698	573	561	1912268	1064397	1195349	267	1017	24657	819665	22287	97	6817	821	2040	233104	1377	319363	406	532652	5984	45950	213	109254	83	533	3904948	59482	439309
HIRAE-j14-exp1-ileon_405	461442	12	86	372	14269	17151	131	2992	15401	311	16341	8174	18858	5085277	20901	32366	110	3033	41627545	67	1863761	766	199	2746051	323987	1027548	6664	16304	73717	846428	89595	268	15498294	1579	13539	261191	1046	308918	860254	647939	15170923	83244	1733	54124	272	940492	1715223	136219	203033
FRAGILIS-j14-exp1-ileon_414	61982	6	502	176	13122	3442	183	2659	14699	235	1854	26	13371	1597874	4971	16350	53	23	636945	63	172417	265	445	87933	144492	87731	1012	437	14488	539437	43373	167	796571	13018	NA	219400	834	300842	54185	147545	1326035	15995	123	67289	126	111075	3503470	210307	83125
ATB-j3-exp1-ileon_346	271	7	22	218	14152	7707	118	1392	16373	582	6473	14	27916	1680012	11	3010	50	236	229594	1117	608	424	257	1404439	1093599	214314	363	333	19477	1213918	26234	197	7782	477	6833	283220	1470	363915	1042	283564	11283	72339	112	115156	7	446	5543534	78321	413061
Nacl-j3-exp1-ileon_342	499076	32	781	841	18138	14086	230	2519	5880	980	10416	28835	130571	4648967	13168	20813	126	43154	61476894	42711	1183240	461	2214	357249	866134	716752	1637	18544	54364	933574	274644	259	7611656	5593	76662	353920	538	350219	503721	341497	13434134	43314	47543	450663	3149	561461	2873940	765157	236970
HIRAE-j14-exp1-ileon_404	259824	36	445	722	22544	47725	176	5949	10192	765	11196	210334	91005	17264911	2460	49767	46	32722	106184099	6259	209542	1011	1443	270147	475428	646552	23157	453317	70160	884156	484532	345	8780825	1115	7427	264653	766	349706	56887	651629	4632274	285095	79570	10067331	9442	58953	2615047	180071	343178
ATB-j3-exp1-ileon_344	516	20	25	253	15570	14813	109	1025	18388	589	7642	7786	108130	2344207	32	3525	74	17709	433505	37273	1148	350	589	2912654	1442885	254096	374	5892	27967	1151487	30804	206	13104	634	2845	360418	1662	364460	668	246541	29306	90841	2634	173128	186	853	4366440	146673	533236
HIRAE-j7-exp1-ileon_380	1277243	12	121	351	6902	6409	94	3082	3744	347	2363	31218	18899	4504532	54858	22629	79	13431	49201372	1151	1007185	874	261	82135	74686	1601869	851	67465	17634	622953	143444	111	11518314	739	3192	191913	1182	279636	218366	580042	11735374	23225	7307	501830	241	178967	2799483	57160	94087
FRAGILIS-j14-exp1-ileon_413	567470	18	1347	1039	30428	15532	133	6280	10180	537	9538	43391	31624	6496430	34195	40495	113	54722	62607540	2912	1623282	812	1005	472486	383817	882246	2386	26445	47012	782052	235908	200	8505983	48989	44848	259783	1815	363120	751312	494999	10016326	75117	40998	904225	160	627231	1517812	421577	171550
HIRAE-j3-exp1-ileon_350	1463	13	1595	246	26886	16738	95	1524	14670	432	7126	11	25325	2641777	598	27370	86	298	273650	271	2531	271	497	1268917	672311	341440	484	883	20049	1384902	19239	203	10407	716	5018	430209	1774	451456	4050	190544	919125	47832	59	57500	94	355	3809386	193085	378280
Nacl-j7-exp1-ileon_372	471071	42	1561	818	30166	12829	152	3287	13192	698	5345	20082	24104	3962547	17072	35516	36	23337	34132783	2236	973625	458	931	355584	397509	201823	235	9585	41083	1247995	136809	223	3830950	42777	52100	377254	1893	475237	222505	309945	6684480	77284	16783	191124	32	247322	4453739	487295	179336
FRAGILIS-j7-exp1-ileon_386	21053	13	496	235	13503	13256	209	1804	20805	305	12034	151	46368	4329332	2345	8483	105	704	689818	389	72868	536	724	11877029	2003538	151546	2860	7746	37803	904114	60627	186	3182772	530	12911	356954	1975	316263	27353	275711	2821558	146221	255	213648	51	27335	2123917	513759	518655
FRAGILIS-j3-exp1-ileon_360	9849	36	478	330	19667	38573	148	1344	9417	1099	15692	124	17000	4937790	554	12008	80	1617	942526	1232	447848	399	544	2621455	1048682	358245	412	13498	43038	1279666	56630	224	3483067	416	101843	352109	1636	409503	46720	175489	850982	126660	216	25487	39	46711	2594638	179553	526285
ATB-j14-exp1-ileon_402	156	16	17	100	9177	6628	104	757	15059	151	7046	56	13103	1425469	73	3180	54	691	211402	1181	384	605	335	795471	584263	257067	308	210	41200	1107078	19428	245	2690	560	6074	280127	1319	310569	354	413777	6085	45429	204	178453	67	369	3292567	37246	362859
ATB-j14-exp1-ileon_397	1693	8	23	119	7629	5524	141	560	16871	1934	6220	14	27149	1263157	168	3246	14	5304	97859	7772	5289	485	407	993894	645430	186675	469	186	14452	1001735	24565	146	43364	254	11065	273837	752	321043	1725	212528	89579	42986	510	131600	65	1379	2317876	47082	366549
BARNECIELA-j3-exp1-ileon_366	5254	27	14	222	10845	10828	95	755	7642	1351	15995	4377	14498	2132267	44	3692	58	10956	395774	1533	25823	259	651	960286	547080	714519	548	3719	22884	1441766	20771	114	190538	153	21986	416618	1297	457487	1528	190175	310597	27196	275	150763	288	262	2824957	166794	332342
HIRAE-j3-exp1-ileon_354	2550	23	272	233	14744	14799	134	2897	5906	790	9158	3168	11509	2292031	188	21651	88	8244	487690	653	6312	440	243	1859704	468165	341437	758	4198	15329	1225029	9839	253	70944	309	4707	417803	1478	390893	2582	185531	532700	49354	92	89020	55	12891	3334720	145371	269983
FRAGILIS-j3-exp1-ileon_356	3270	44	7520	631	48647	13980	240	783	21502	1020	12014	232	66956	3251333	85	9715	144	3328	13845385	7090	74994	183	944	5814587	1116153	222843	393	2437	24735	1353848	42089	271	863982	872	90248	342509	1267	399930	5498	208303	121913	90488	2423	405038	131	663	5392549	299619	478725
BARNECIELA-j7-exp1-ileon_392	687995	19	34	180	7127	6318	92	1601	10355	634	11721	11538	22141	3003671	107542	11764	81	118124	413908	2028	1984356	765	594	109540	123019	1366711	2135	9590	29593	716593	51503	277	10487348	23	10233	233175	1022	268543	1278744	460086	23856498	16953	3496	289697	34	444332	1860795	90036	356465
BARNECIELA-j3-exp1-ileon_362	2526	30	448	184	11052	9866	94	660	9103	4605	12324	166	11606	2723498	127	8406	50	540	496717	803	5265	257	722	1225084	1195227	791230	395	1010	19638	1437691	41401	191	15789	249	78110	431147	1446	444661	428	130322	144197	45726	186	87197	48	349	2540092	236112	337119
BARNECIELA-j14-exp1-ileon_417	1985754	19	36	943	16948	16836	236	6884	28377	455	34060	68406	42922	11626014	59366	30069	160	36455	74120438	3244	2302945	1590	1002	253952	363884	7809446	26051	171421	63745	591602	106204	294	13849340	3091	9224	232427	1522	337724	1457394	1427912	25689128	28730	45413	3628816	9293	81939	2224509	269677	394633
FRAGILIS-j7-exp1-ileon_388	872828	12	58	379	12911	7498	84	6367	5758	327	22323	29839	15906	6830256	11031	9979	121	15428	95817365	440	900890	1403	400	368041	176482	5042912	2827	28091	19963	666372	99755	291	10750469	479	2539	223899	1319	329719	294529	1064976	18804801	37908	2606	681142	74	1837900	2207778	103511	113167
BARNECIELA-j7-exp1-ileon_396	215710	10	1069	878	36200	16590	124	2805	24917	1318	30466	45814	65258	10394315	39870	44322	122	10191	75343015	1485	336972	1274	607	3574279	869227	1339914	22466	63533	76442	845047	102641	212	4760682	2096	44551	232467	1896	339027	188676	1008814	12021309	110514	7167	1328462	362	104577	4786461	311480	305028
HIRAE-j7-exp1-ileon_384	2363355	27	136	119	22521	15053	114	1273	7604	788	15807	39127	230448	6651741	58722	25912	93	43452	606842	39341	1359898	1004	902	234674	664705	1174398	7788	52317	27562	681395	149043	454	26509772	819	23061	214305	1079	284720	682832	771442	27548254	67916	12926	1010154	8287	1944264	2126643	1235889	235898
Nacl-j7-exp1-ileon_368	675115	25	1322	467	26079	26749	164	1569	12544	1843	11211	95926	160740	10864743	7763	19262	139	41012	89748795	56365	459741	347	2334	881396	2159687	134247	10440	82366	48691	1568084	339958	190	2220150	4994	99158	427111	1791	488004	149075	181630	5506058	336810	87098	1975445	9494	112214	2614709	1175294	535840
FRAGILIS-j14-exp1-ileon_410	423219	30	1565	1919	30033	9039	158	5242	6965	392	6246	5134	15089	3865087	16455	20139	71	17651	37182041	224	841511	469	691	317682	470149	268082	1107	13407	15086	717304	115922	267	7250075	11286	24533	295086	1091	319152	245233	290426	6525490	40429	81	238626	188	288890	1867650	526182	164947
HIRAE-j14-exp1-ileon_406	1312446	9	67	241	8293	8101	127	2203	5306	554	7401	17252	28044	3039534	16627	27026	74	26185	277669	4454	2312095	377	569	357655	199842	529059	3234	12797	27466	807368	84418	311	18284533	1063	30289	266930	853	324333	1032931	260235	16777400	44613	8424	167731	1397	52072	2510345	114021	437585
ATB-j3-exp1-ileon_348	5334	3	24	192	10895	6572	114	702	15509	423	10159	6083	22547	2277280	2848	3475	75	11876	220775	2771	78519	436	505	39358445	1031398	303809	1203	2329	28344	1220137	24410	183	1047771	193	2781	333229	1341	366849	28740	256524	2686902	52071	2304	273856	60	4069	2607252	135673	383869
BARNECIELA-j14-exp1-ileon_418	890503	46	426	602	31432	18936	225	3615	21873	1093	5548	85842	101208	7449360	18581	57174	153	43399	63537134	29855	968550	371	1139	490878	1590881	385537	8089	62624	64641	678109	255732	240	4577928	16574	75466	244007	3739	320958	296362	266138	5934993	153207	128781	1805220	290	292268	1114777	818649	426900
St_SCFA-exp3-ileon_pre	NA	237683	270024	204625	NA	NA	19950	111191	NA	NA	NA	NA	NA	NA	NA	17910	21	NA	NA	NA	NA	NA	NA	NA	NA	NA	NA	NA	NA	NA	NA	14045	NA	186678	NA	NA	196468	NA	NA	NA	NA	NA	NA	NA	NA	NA	NA	NA	NA
St_PA-exp2-ileon_pre.paileon2	NA	NA	NA	NA	NA	NA	NA	NA	NA	NA	NA	NA	NA	NA	NA	NA	NA	NA	NA	NA	NA	NA	NA	NA	NA	NA	NA	NA	NA	NA	NA	NA	NA	NA	35	NA	NA	NA	NA	NA	NA	NA	NA	NA	NA	NA	NA	NA	NA
St_BA1-exp3-ileon_pre	63	NA	NA	NA	NA	NA	NA	NA	NA	NA	NA	NA	NA	NA	183823	NA	NA	NA	NA	NA	4570	NA	NA	NA	NA	NA	NA	NA	NA	NA	NA	NA	11034	NA	NA	NA	NA	NA	222476	NA	171420	NA	NA	NA	NA	357294	NA	NA	NA
St_AA_exp3-ileon_pre	NA	NA	NA	NA	4589	10378	NA	NA	6627	237	80	1073596	2055	241693	NA	NA	NA	1509	2103487	18	NA	53	1078	707	1225	564	16	128885	6887	600061	1889253	NA	NA	NA	NA	174936	NA	100037	NA	584	NA	47776328	58217	32258	3156	NA	8335151	516	507
St_BA2-exp3-ileon_pre	103639	NA	NA	NA	NA	NA	NA	NA	NA	NA	NA	NA	NA	NA	15	NA	NA	NA	NA	NA	NA	NA	NA	NA	NA	NA	NA	NA	NA	NA	NA	NA	839372	NA	NA	NA	NA	NA	134549	NA	2080	NA	NA	NA	NA	11668	NA	NA	NA
St_PA-exp2-ileon_post	NA	NA	NA	NA	NA	NA	NA	NA	NA	NA	NA	NA	NA	NA	NA	NA	NA	NA	NA	NA	NA	NA	NA	NA	NA	NA	NA	NA	NA	NA	NA	NA	NA	NA	61	NA	NA	NA	NA	NA	NA	NA	NA	NA	NA	NA	NA	NA	NA
St_PA-exp2-ileon_pre.paileon1	NA	NA	NA	NA	NA	NA	NA	NA	NA	NA	NA	NA	NA	NA	NA	NA	NA	NA	NA	NA	NA	NA	NA	NA	NA	NA	NA	NA	NA	NA	NA	NA	NA	NA	193	NA	NA	NA	NA	NA	NA	NA	NA	NA	NA	NA	NA	NA	NA
St_SCFA-exp3-ileon_post	NA	352875	332394	274285	NA	NA	17098	140316	NA	NA	NA	NA	NA	NA	NA	12233	31	NA	NA	NA	NA	NA	NA	NA	NA	NA	NA	NA	NA	NA	NA	21213	NA	223941	NA	NA	229003	NA	NA	NA	NA	NA	NA	NA	NA	NA	NA	NA	NA
St_AA_exp3-ileon_post	NA	NA	NA	NA	1799	38750	NA	NA	8970	349	429	28735	937	236197	NA	NA	NA	167	333523	16	NA	43	242	766	1756	1109	40	745	6151	266019	855025	NA	NA	NA	NA	108749	NA	66137	NA	646	NA	80885887	5711	15450	24	NA	10854783	1357	6246
St_SCFA-exp2-ileon_pre	NA	365497	420062	295374	NA	NA	26955	131663	NA	NA	NA	NA	NA	NA	NA	32973	7	NA	NA	NA	NA	NA	NA	NA	NA	NA	NA	NA	NA	NA	NA	32316	NA	215328	NA	NA	222296	NA	NA	NA	NA	NA	NA	NA	NA	NA	NA	NA	NA
St_AA-exp1-ileon_pre	NA	NA	NA	NA	3113	6891	NA	NA	6091	79	11	1022839	1686	319004	NA	NA	NA	1451	2747707	22	NA	10	809	376	1005	2623	22	150535	8247	1437377	1285674	NA	NA	NA	NA	252728	NA	96485	NA	934	NA	56141902	52702	114809	902	NA	2440497	600	36
St_BA2-exp3-ileon_post	103784	NA	NA	NA	NA	NA	NA	NA	NA	NA	NA	NA	NA	NA	25	NA	NA	NA	NA	NA	15515	NA	NA	NA	NA	NA	NA	NA	NA	NA	NA	NA	861063	NA	NA	NA	NA	NA	110554	NA	2173	NA	NA	NA	NA	17938	NA	NA	NA
St_BA1-exp3-ileon_post	79	NA	NA	NA	NA	NA	NA	NA	NA	NA	NA	NA	NA	NA	204786	NA	NA	NA	NA	NA	11807	NA	NA	NA	NA	NA	NA	NA	NA	NA	NA	NA	NA	NA	NA	NA	NA	NA	182489	NA	182239	NA	NA	NA	NA	313144	NA	NA	NA
St_BA1-exp2-ileon_pre	2872	NA	NA	NA	NA	NA	NA	NA	NA	NA	NA	NA	NA	NA	190101	NA	NA	NA	NA	NA	3960	NA	NA	NA	NA	NA	NA	NA	NA	NA	NA	NA	9399	NA	NA	NA	NA	NA	179724	NA	177195	NA	NA	NA	NA	305960	NA	NA	NA
St_BA2-exp2-ileon_pre	93173	NA	NA	NA	NA	NA	NA	NA	NA	NA	NA	NA	NA	NA	46	NA	NA	NA	NA	NA	5734	NA	NA	NA	NA	NA	NA	NA	NA	NA	NA	NA	804159	NA	NA	NA	NA	NA	257918	NA	3750	NA	NA	NA	NA	15346	NA	NA	NA
St_SCFA-exp2-ileon_post	NA	427897	419277	302074	NA	NA	22292	143167	NA	NA	NA	NA	NA	NA	NA	24901	72	NA	NA	NA	NA	NA	NA	NA	NA	NA	NA	NA	NA	NA	NA	26262	NA	220269	NA	NA	237101	NA	NA	NA	NA	NA	NA	NA	NA	NA	NA	NA	NA
St_SCFA1-exp1-ileon_pre	NA	192836	200045	153163	NA	NA	13527	90805	NA	NA	NA	NA	NA	NA	NA	13544	29	NA	NA	NA	NA	NA	NA	NA	NA	NA	NA	NA	NA	NA	NA	18424	NA	91610	NA	NA	99896	NA	NA	NA	NA	NA	NA	NA	NA	NA	NA	NA	NA
St_BA2-exp2-ileon_post	113551	NA	NA	NA	NA	NA	NA	NA	NA	NA	NA	NA	NA	NA	973	NA	NA	NA	NA	NA	11842	NA	NA	NA	NA	NA	NA	NA	NA	NA	NA	NA	923961	NA	NA	NA	NA	NA	179415	NA	4122	NA	NA	NA	NA	10912	NA	NA	NA
St_BA1-exp2-ileon_post	3041	NA	NA	NA	NA	NA	NA	NA	NA	NA	NA	NA	NA	NA	216038	NA	NA	NA	NA	NA	4402	NA	NA	NA	NA	NA	NA	NA	NA	NA	NA	NA	4528	NA	NA	NA	NA	NA	163952	NA	187945	NA	NA	NA	NA	286614	NA	NA	NA
St_BA1-exp1-ileon_pre	3507	NA	NA	NA	NA	NA	NA	NA	NA	NA	NA	NA	NA	NA	212163	NA	NA	NA	NA	NA	2837	NA	NA	NA	NA	NA	NA	NA	NA	NA	NA	NA	453294	NA	NA	NA	NA	NA	160828	NA	188053	NA	NA	NA	NA	282410	NA	NA	NA
St_BA2-exp1-ileon_pre	115782	NA	NA	NA	NA	NA	NA	NA	NA	NA	NA	NA	NA	NA	28	NA	NA	NA	NA	NA	7388	NA	NA	NA	NA	NA	NA	NA	NA	NA	NA	NA	956323	NA	NA	NA	NA	NA	159873	NA	3628	NA	NA	NA	NA	169240	NA	NA	NA
St_PA-exp1-ileon_post	NA	NA	NA	NA	NA	NA	NA	NA	NA	NA	NA	NA	NA	NA	NA	NA	NA	NA	NA	NA	NA	NA	NA	NA	NA	NA	NA	NA	NA	NA	NA	NA	NA	NA	115	NA	NA	NA	NA	NA	NA	NA	NA	NA	NA	NA	NA	NA	NA
St_PA-exp3-ileon_pre	NA	NA	NA	NA	NA	NA	NA	NA	NA	NA	NA	NA	NA	NA	NA	NA	NA	NA	NA	NA	NA	NA	NA	NA	NA	NA	NA	NA	NA	NA	NA	NA	NA	NA	376	NA	NA	NA	NA	NA	NA	NA	NA	NA	NA	NA	NA	NA	NA
St_AA-exp1-ileon_post	NA	NA	NA	NA	1316	29811	NA	NA	7441	288	52	128	687	244937	NA	NA	NA	34	55805	26	NA	35	227	697	1984	3540	15	95	4425	279863	502860	NA	NA	NA	NA	139038	NA	66612	NA	1148	NA	95712369	13541	20553	30	NA	3755454	1698	6250
St_AA_exp2-ileon_pre	NA	NA	NA	NA	2995	7009	NA	NA	5387	60	12	1196178	1540	250770	NA	NA	NA	858	3526874	16	NA	12	842	295	1499	1911	70	171909	23396	8046315	1402837	NA	NA	NA	NA	397444	NA	236162	NA	528	NA	59943193	41427	112043	967	NA	7828936	1875	46
St_PA-exp3-ileon_post	NA	NA	NA	NA	NA	NA	NA	NA	NA	NA	NA	NA	NA	NA	NA	NA	NA	NA	NA	NA	NA	NA	NA	NA	NA	NA	NA	NA	NA	NA	NA	NA	NA	NA	64	NA	NA	NA	NA	NA	NA	NA	NA	NA	NA	NA	NA	NA	NA
St_SCFA1-exp1-ileon_post	NA	260986	228138	167064	NA	NA	3367	95237	NA	NA	NA	NA	NA	NA	NA	14642	43	NA	NA	NA	NA	NA	NA	NA	NA	NA	NA	NA	NA	NA	NA	10551	NA	110519	NA	NA	138443	NA	NA	NA	NA	NA	NA	NA	NA	NA	NA	NA	NA
St_AA_exp2-ileon_post	NA	NA	NA	NA	3793	34782	NA	NA	6622	336	299	1833	600	273548	NA	NA	NA	148	182332	56	NA	7	NA	1949	2937	2846	30	62	8566	272582	815899	NA	NA	NA	NA	96833	NA	99642	NA	857	NA	95647139	13577	31053	22	NA	10372272	1415	6944
St_BA2-exp1-ileon_post	114997	NA	NA	NA	NA	NA	NA	NA	NA	NA	NA	NA	NA	NA	65	NA	NA	NA	NA	NA	12390	NA	NA	NA	NA	NA	NA	NA	NA	NA	NA	NA	914479	NA	NA	NA	NA	NA	141024	NA	4631	NA	NA	NA	NA	141056	NA	NA	NA
St_BA1-exp1-ileon_post	2740	NA	NA	NA	NA	NA	NA	NA	NA	NA	NA	NA	NA	NA	212246	NA	NA	NA	NA	NA	5207	NA	NA	NA	NA	NA	NA	NA	NA	NA	NA	NA	435400	NA	NA	NA	NA	NA	120835	NA	182863	NA	NA	NA	NA	226045	NA	NA	NA
[truncated: 112 more columns]

## Sheet: Height
Sid	12-dehydrocholic acid@5.31-ba	2-hydroxy-2-methylbutyric acid@3.48-sf	2-hydroxy-3-methylbutyric acid@4.59-sf	2-hydroxybutyric acid@2.50-sf	2-hydroxyglutaric acid@13.00-gc	2-oxoglutaric acid@13.01-gc	2-oxovaleric acid@14.62-sf	3-hydroxybutyric acid@1.66-sf	3-hydroxyisovaleric acid@7.82-gc	3-methylhistidine@16.87-gc	4-hydroxymandelic acid@15.21-gc	4-hydroxyproline@12.45-gc	5-aminovaleric acid@13.52-gc	5-oxoproline@12.34-gc	7,12-dihydroxy-3-oxocholanoic acid@7.00-ba	Acetic acid@1.79-sf	Acetoacetic acid@13.46-sf	Adenine@16.18-gc	Alanine@6.91-gc	Allantoin@16.53-gc	Alpha-muricholic acid@5.91-ba	Alpha-tocopherol@29.50-gc	Anthranilic acid@13.42-gc	Arabinose@14.16-gc	Arabitol@14.80-gc	Arachidonic acid@23.73-gc	Asparagine@14.11-gc	Aspartic acid@12.35-gc	Behenic acid@26.40-gc	Benzoic acid@8.76-gc	Beta-alanine@11.15-gc	Beta-hydroxypyruvic acid@14.00-sf	Beta-muricholic acid@6.17-ba	Butanoic acid@5.28-sf	Cadaverine@4.55-pa	Capric acid@11.44-gc	Caproic acid@12.09-sf	Caprylic acid@8.95-gc	Chenodeoxycholic acid@10.27-ba	Cholesterol@29.50-gc	Cholic acid@9.09-ba	Citric acid;Isocitric acid@15.80-gc	Citrulline@15.77-gc	Creatine@12.79-gc	Cytosine@12.37-gc	Deoxycholic acid@10.48-ba	Dimethylglycine@5.43-gc	Erythritol@12.29-gc	Ferulic acid@19.18-gc
BlM-exp3-ileon_pre	NA	17	10	16	NA	NA	3173	18	NA	NA	NA	NA	NA	NA	NA	408	3	NA	NA	NA	NA	NA	NA	NA	NA	NA	NA	NA	NA	NA	NA	564	NA	65	NA	NA	204	NA	NA	NA	NA	NA	NA	NA	NA	NA	NA	NA	NA
BlM_exp3-ileon_pre	7	NA	NA	NA	2118	48	NA	NA	2735	172	16	132	368	46339	1	NA	NA	30	66026	44	13	51	535	244	170	670	30	78	2753	765737	1298	NA	9	NA	238	149698	NA	253306	62	417	55	56462	9	170	4	93	2998400	203	514
BlM-exp3-ileon_post	NA	1	2	5	NA	NA	38	27	NA	NA	NA	NA	NA	NA	NA	354	2	NA	NA	NA	NA	NA	NA	NA	NA	NA	NA	NA	NA	NA	NA	55	NA	80	NA	NA	255	NA	NA	NA	NA	NA	NA	NA	NA	NA	NA	NA	NA
BlM-exp2-ileon_pre	NA	15	15	25	NA	NA	5043	24	NA	NA	NA	NA	NA	NA	NA	1064	3	NA	NA	NA	NA	NA	NA	NA	NA	NA	NA	NA	NA	NA	NA	1529	NA	84	NA	NA	151	NA	NA	NA	NA	NA	NA	NA	NA	NA	NA	NA	NA
BlM_exp2-ileon_4a	124	NA	NA	NA	NA	NA	NA	NA	NA	NA	NA	NA	NA	NA	5	NA	NA	NA	NA	NA	128	NA	NA	NA	NA	NA	NA	NA	NA	NA	NA	NA	713	NA	NA	NA	NA	NA	27	NA	1182	NA	NA	NA	NA	46	NA	NA	NA
BlM_exp2-ileon_pre	NA	NA	NA	NA	1057	49	NA	NA	2394	369	10	778	510	61453	NA	NA	NA	71	233028	41	NA	18	272	1320	1640	992	693	3636	8067	1629572	2194	NA	NA	NA	19	193852	NA	263389	NA	598	NA	15450	127	848	319	NA	2527348	1041	231
BlM_exp1-ileon_pre	52392	NA	NA	NA	1430	86	NA	NA	1970	204	7	547	238	56483	1096	NA	NA	169	135885	87	98571	18	398	80	77	1231	86	2003	3170	677890	1105	NA	627469	NA	39	145300	NA	175912	39741	803	1298212	16376	143	277	198	51066	2229806	421	191
BlM_exp3-ileon_post	8	NA	NA	NA	980	121	NA	NA	3344	228	95	137	585	63751	3	NA	NA	88	18297	88	14	70	221	477	1037	2099	12	53	2676	771394	1004	NA	82	NA	28	167613	NA	282048	10	527	234	2638	116	303	5	47	3854599	831	5018
BlM-exp2-ileon_post	NA	1	3	8	NA	NA	93	50	NA	NA	NA	NA	NA	NA	NA	873	9	NA	NA	NA	NA	NA	NA	NA	NA	NA	NA	NA	NA	NA	NA	40	NA	90	NA	NA	154	NA	NA	NA	NA	NA	NA	NA	NA	NA	NA	NA	NA
BlM-exp1-ileon_5a	NA	11	10	10	NA	NA	2321	14	NA	NA	NA	NA	NA	NA	NA	157	3	NA	NA	NA	NA	NA	NA	NA	NA	NA	NA	NA	NA	NA	NA	756	NA	36	NA	NA	74	NA	NA	NA	NA	NA	NA	NA	NA	NA	NA	NA	NA
BlM_exp2-ileon_4b	141	NA	NA	NA	NA	NA	NA	NA	NA	NA	NA	NA	NA	NA	5	NA	NA	NA	NA	NA	214	NA	NA	NA	NA	NA	NA	NA	NA	NA	NA	NA	751	NA	NA	NA	NA	NA	13	NA	1240	NA	NA	NA	NA	65	NA	NA	NA
BlM_exp2-ileon_post	NA	NA	NA	NA	1016	70	NA	NA	2783	233	46	236	324	74907	NA	NA	NA	75	17709	31	NA	76	287	2174	3533	2992	5	20	6382	698564	1458	NA	NA	NA	30	163017	NA	283072	NA	867	NA	696	77	281	13	NA	3050091	2222	6875
BlM_exp1-ileon_post	NA	NA	NA	NA	785	86	NA	NA	2219	295	49	49	306	65766	NA	NA	NA	40	19092	18	NA	143	180	212	628	2900	25	38	2537	586479	694	NA	NA	NA	6	166652	NA	218884	NA	881	NA	1729	52	254	37	NA	2810151	787	5263
BlM-exp1-ileon_5b	NA	NA	2	2	NA	NA	17	13	NA	NA	NA	NA	NA	NA	NA	181	7	NA	NA	NA	NA	NA	NA	NA	NA	NA	NA	NA	NA	NA	NA	34	NA	33	NA	NA	85	NA	NA	NA	NA	NA	NA	NA	NA	NA	NA	NA	NA
BMl_-exp1-ileon_post	4	NA	NA	NA	NA	NA	NA	NA	NA	NA	NA	NA	NA	NA	7	NA	NA	NA	NA	NA	19	NA	NA	NA	NA	NA	NA	NA	NA	NA	NA	NA	165	NA	NA	NA	NA	NA	33	NA	608	NA	NA	NA	NA	40	NA	NA	NA
QC-exp3-ileon_5a	NA	5	114	155	NA	NA	276	784	NA	NA	NA	NA	NA	NA	NA	3392	6	NA	NA	NA	NA	NA	NA	NA	NA	NA	NA	NA	NA	NA	NA	20	NA	1218	NA	NA	432	NA	NA	NA	NA	NA	NA	NA	NA	NA	NA	NA	NA
QC_exp123-ileon_pre.baileon3	44354	NA	NA	NA	NA	NA	NA	NA	NA	NA	NA	NA	NA	NA	862	NA	NA	NA	NA	NA	82515	NA	NA	NA	NA	NA	NA	NA	NA	NA	NA	NA	510718	NA	NA	NA	NA	NA	29994	NA	1103911	NA	NA	NA	NA	39401	NA	NA	NA
QC-exp3-ileon_5b	NA	3	135	160	NA	NA	153	790	NA	NA	NA	NA	NA	NA	NA	3250	20	NA	NA	NA	NA	NA	NA	NA	NA	NA	NA	NA	NA	NA	NA	43	NA	1404	NA	NA	532	NA	NA	NA	NA	NA	NA	NA	NA	NA	NA	NA	NA
QC-exp3-ileon_5c	NA	5	150	156	NA	NA	158	770	NA	NA	NA	NA	NA	NA	NA	3316	20	NA	NA	NA	NA	NA	NA	NA	NA	NA	NA	NA	NA	NA	NA	54	NA	1534	NA	NA	619	NA	NA	NA	NA	NA	NA	NA	NA	NA	NA	NA	NA
QC-exp3-ileon_5d	NA	5	156	169	NA	NA	202	757	NA	NA	NA	NA	NA	NA	NA	3368	22	NA	NA	NA	NA	NA	NA	NA	NA	NA	NA	NA	NA	NA	NA	73	NA	1494	NA	NA	613	NA	NA	NA	NA	NA	NA	NA	NA	NA	NA	NA	NA
QC_exp3-ileon_6a	NA	NA	NA	NA	22833	13175	NA	NA	9220	686	19491	17860	49982	3161702	NA	NA	NA	53190	35034347	39916	NA	793	640	1257656	554922	692000	3353	8459	32125	730917	101628	NA	NA	NA	NA	196811	NA	296234	NA	530938	NA	88612	92910	638795	122	NA	1973896	185545	187548
QC-exp3-ileon_5e	NA	5	152	167	NA	NA	128	813	NA	NA	NA	NA	NA	NA	NA	3159	33	NA	NA	NA	NA	NA	NA	NA	NA	NA	NA	NA	NA	NA	NA	83	NA	1536	NA	NA	777	NA	NA	NA	NA	NA	NA	NA	NA	NA	NA	NA	NA
QC_exp3-ileon_6b	NA	NA	NA	NA	23153	12079	NA	NA	9361	556	18736	73774	62657	3590097	NA	NA	NA	58145	46366903	44588	NA	1077	869	1300319	551091	663256	4872	82436	32203	777413	124692	NA	NA	NA	NA	205459	NA	305807	NA	525999	NA	85865	134157	1704692	378	NA	2013771	187616	173275
QC_exp3-ileon_5a	42399	NA	NA	NA	23671	12150	NA	NA	9620	717	17362	178654	57771	3454903	657	NA	NA	53664	50713950	106251	105342	726	829	1219752	495897	646308	16944	533500	32602	745345	140463	NA	555267	NA	1147	186549	NA	282276	37227	484967	925700	158661	155126	2575070	286	35473	1469788	169653	162189
QC-exp3-ileon_5f	NA	7	138	189	NA	NA	115	814	NA	NA	NA	NA	NA	NA	NA	3101	38	NA	NA	NA	NA	NA	NA	NA	NA	NA	NA	NA	NA	NA	NA	95	NA	1515	NA	NA	771	NA	NA	NA	NA	NA	NA	NA	NA	NA	NA	NA	NA
QC_exp3-ileon_6c	NA	NA	NA	NA	24013	13577	NA	NA	9486	535	18451	135102	74060	3936013	NA	NA	NA	63598	48415135	46114	NA	875	1114	1299853	557779	666565	4921	231192	34810	797908	141350	NA	NA	NA	NA	210780	NA	321346	NA	518228	NA	90337	166694	2212159	219	NA	2038165	193618	175397
QC_exp3-ileon_5b	40817	NA	NA	NA	23887	12532	NA	NA	9756	343	18587	30780	52464	3096164	612	NA	NA	56725	39527983	50954	97575	743	692	1283133	529862	695837	5973	15478	30947	738971	164028	NA	541844	NA	1368	183805	NA	287852	35601	498156	892370	122426	110033	1141023	262	34327	1544059	183846	187230
QC-exp3-ileon_5g	NA	6	147	172	NA	NA	58	823	NA	NA	NA	NA	NA	NA	NA	3073	38	NA	NA	NA	NA	NA	NA	NA	NA	NA	NA	NA	NA	NA	NA	90	NA	1451	NA	NA	716	NA	NA	NA	NA	NA	NA	NA	NA	NA	NA	NA	NA
QC_exp3-ileon_6d	NA	NA	NA	NA	24705	12101	NA	NA	9791	465	19443	48770	63184	3664042	NA	NA	NA	61727	47775683	53438	NA	1103	1272	1318259	594618	758345	2848	36546	35360	873574	132629	NA	NA	NA	NA	230721	NA	317080	NA	558898	NA	88484	149792	1358687	56	NA	2080278	206968	194326
QC-exp3-ileon_5h	NA	13	129	169	NA	NA	76	799	NA	NA	NA	NA	NA	NA	NA	3117	31	NA	NA	NA	NA	NA	NA	NA	NA	NA	NA	NA	NA	NA	NA	83	NA	1421	NA	NA	712	NA	NA	NA	NA	NA	NA	NA	NA	NA	NA	NA	NA
QC_exp123-ileon_post.baileon3	51020	NA	NA	NA	NA	NA	NA	NA	NA	NA	NA	NA	NA	NA	1026	NA	NA	NA	NA	NA	88837	NA	NA	NA	NA	NA	NA	NA	NA	NA	NA	NA	574517	NA	NA	NA	NA	NA	32050	NA	1193728	NA	NA	NA	NA	44096	NA	NA	NA
QC-exp2-ileon_5a	NA	5	146	209	NA	NA	413	655	NA	NA	NA	NA	NA	NA	NA	8672	15	NA	NA	NA	NA	NA	NA	NA	NA	NA	NA	NA	NA	NA	NA	29	NA	2407	NA	NA	320	NA	NA	NA	NA	NA	NA	NA	NA	NA	NA	NA	NA
QC_exp3-ileon_5c	43027	NA	NA	NA	24240	12960	NA	NA	10157	508	17020	26695	48282	3072718	615	NA	NA	51640	40852106	49134	107717	893	800	1230652	551074	708060	3917	13347	33883	771655	118640	NA	564084	NA	1141	191454	NA	292400	36432	519935	933316	127208	102391	1063632	124	36007	1517433	188748	188313
QC_exp123-ileon_6a	47907	NA	NA	NA	NA	NA	NA	NA	NA	NA	NA	NA	NA	NA	976	NA	NA	NA	NA	NA	91095	NA	NA	NA	NA	NA	NA	NA	NA	NA	NA	NA	573109	NA	NA	NA	NA	NA	31514	NA	1168264	NA	NA	NA	NA	41113	NA	NA	NA
QC_exp2-ileon_5e	33121	NA	NA	NA	NA	NA	NA	NA	NA	NA	NA	NA	NA	NA	848	NA	NA	NA	NA	NA	65601	NA	NA	NA	NA	NA	NA	NA	NA	NA	NA	NA	448989	NA	980	NA	NA	NA	33451	NA	1139221	NA	NA	NA	NA	62027	NA	NA	NA
QC_exp2-ileon_5a	31415	NA	NA	NA	17471	12246	NA	NA	8689	1175	12133	121233	70192	3170503	890	NA	NA	36023	46972742	39235	65545	646	809	3500219	511935	343091	4379	358780	36880	899193	131969	NA	445220	NA	836	201551	NA	309426	33889	413226	1137933	103565	42326	2476462	2430	62142	2535732	218369	151640
QC-exp2-ileon_5b	NA	5	147	213	NA	NA	257	669	NA	NA	NA	NA	NA	NA	NA	8682	30	NA	NA	NA	NA	NA	NA	NA	NA	NA	NA	NA	NA	NA	NA	26	NA	2557	NA	NA	356	NA	NA	NA	NA	NA	NA	NA	NA	NA	NA	NA	NA
QC_exp2-ileon_5f	33122	NA	NA	NA	NA	NA	NA	NA	NA	NA	NA	NA	NA	NA	980	NA	NA	NA	NA	NA	66778	NA	NA	NA	NA	NA	NA	NA	NA	NA	NA	NA	452107	NA	928	NA	NA	NA	33688	NA	1145210	NA	NA	NA	NA	62798	NA	NA	NA
QC_exp2-ileon_5b	32151	NA	NA	NA	18076	12233	NA	NA	9467	679	11529	4390	40437	2108899	845	NA	NA	5475	6964385	3711	65349	646	655	3693963	546084	357004	1577	2626	30525	877050	65132	NA	441843	NA	982	195639	NA	291941	33610	438048	1144325	68885	3383	49376	97	62254	2622949	234341	175488
QC-exp2-ileon_5c	NA	9	142	182	NA	NA	253	717	NA	NA	NA	NA	NA	NA	NA	8532	16	NA	NA	NA	NA	NA	NA	NA	NA	NA	NA	NA	NA	NA	NA	36	NA	3093	NA	NA	335	NA	NA	NA	NA	NA	NA	NA	NA	NA	NA	NA	NA
QC_exp3-ileon_5d	44983	NA	NA	NA	25417	11594	NA	NA	10606	539	20335	72978	68189	3780969	821	NA	NA	61793	47170531	57502	108095	976	961	1380993	581089	738184	2756	81766	36961	832683	137833	NA	574827	NA	1046	199703	NA	316937	37268	551349	937011	125622	170431	1503393	95	36417	1679004	203808	190853
QC_exp1-ileon_5a	78466	NA	NA	NA	11824	8265	NA	NA	6228	533	7089	14218	39408	2487248	1544	NA	NA	16871	24998996	19816	99254	613	753	986943	316310	313001	1496	12133	21505	767835	70320	NA	742205	NA	930	225593	NA	236420	50468	289154	1534817	71310	15639	958494	53	60043	3225015	142100	114604
QC_exp2-ileon_5c	32901	NA	NA	NA	18344	11927	NA	NA	9864	1341	12903	2019	29864	1806716	934	NA	NA	1956	418597	1230	67112	754	621	3759334	573925	402195	1669	1669	33597	914090	50339	NA	446253	NA	936	217034	NA	299694	34587	454211	1142376	71177	218	14632	50	61740	2703266	248938	206994
QC-exp2-ileon_5d	NA	7	158	208	NA	NA	242	706	NA	NA	NA	NA	NA	NA	NA	8377	20	NA	NA	NA	NA	NA	NA	NA	NA	NA	NA	NA	NA	NA	NA	45	NA	3384	NA	NA	368	NA	NA	NA	NA	NA	NA	NA	NA	NA	NA	NA	NA
QC_exp2-ileon_5g	34176	NA	NA	NA	NA	NA	NA	NA	NA	NA	NA	NA	NA	NA	982	NA	NA	NA	NA	NA	68480	NA	NA	NA	NA	NA	NA	NA	NA	NA	NA	NA	452632	NA	898	NA	NA	NA	33643	NA	1146272	NA	NA	NA	NA	63485	NA	NA	NA
QC_exp1-ileon_5b	77771	NA	NA	NA	10378	7906	NA	NA	6453	627	6843	4124	30719	2090689	1859	NA	NA	7656	510537	5097	104856	455	483	936479	325321	330672	911	1749	16496	739986	48325	NA	766307	NA	1092	229480	NA	220715	48316	315060	1592043	51722	3461	134096	71	59528	3418133	142507	117050
QC-exp2-ileon_5e	NA	5	163	205	NA	NA	217	657	NA	NA	NA	NA	NA	NA	NA	8533	26	NA	NA	NA	NA	NA	NA	NA	NA	NA	NA	NA	NA	NA	NA	36	NA	1615	NA	NA	395	NA	NA	NA	NA	NA	NA	NA	NA	NA	NA	NA	NA
QC_exp1-ileon_5c	79189	NA	NA	NA	10738	8578	NA	NA	7387	479	7746	7748	51198	2661378	1565	NA	NA	14834	10345356	6297	104863	784	526	1004021	335428	353852	1103	3591	18442	807608	49748	NA	768520	NA	1021	241790	NA	247687	49061	337006	1595839	55732	6216	416102	263	60268	3594437	149405	123293
QC_exp2-ileon_5d	33082	NA	NA	NA	19507	11318	NA	NA	10196	1547	13042	2907	56270	2719949	927	NA	NA	5422	32861443	3304	67825	659	781	4058566	614776	415084	1787	3354	39981	984907	71690	NA	447365	NA	1127	232545	NA	326658	34172	494253	1157739	73059	4232	189628	56	61632	2948389	266063	188047
QC_exp1-ileon_6a	NA	NA	NA	NA	10606	8719	NA	NA	5506	762	7366	6144	33203	2301058	NA	NA	NA	13725	232742	1206	NA	376	714	1015123	347912	371926	965	2501	20382	766033	40933	NA	NA	NA	NA	244781	NA	251641	NA	338185	NA	36485	2201	115935	82	NA	4492903	146643	119868
QC_exp3-ileon_5e	45750	NA	NA	NA	NA	NA	NA	NA	NA	NA	NA	NA	NA	NA	717	NA	NA	NA	NA	NA	108528	NA	NA	NA	NA	NA	NA	NA	NA	NA	NA	NA	586333	NA	800	NA	NA	NA	37075	NA	944127	NA	NA	NA	NA	37275	NA	NA	NA
QC-exp2-ileon_5f	NA	7	146	215	NA	NA	174	744	NA	NA	NA	NA	NA	NA	NA	8348	22	NA	NA	NA	NA	NA	NA	NA	NA	NA	NA	NA	NA	NA	NA	57	NA	3278	NA	NA	468	NA	NA	NA	NA	NA	NA	NA	NA	NA	NA	NA	NA
QC_exp1-ileon_5d	79019	NA	NA	NA	10711	8043	NA	NA	7468	523	6289	1330	35189	2160204	1673	NA	NA	1240	529059	436	107851	587	888	984047	341547	310429	836	1406	17459	782700	36717	NA	773691	NA	1322	245948	NA	237738	47980	326194	1621678	50158	202	102123	42	58146	3517556	149042	110640
QC_exp3-ileon_5f	47098	NA	NA	NA	NA	NA	NA	NA	NA	NA	NA	NA	NA	NA	716	NA	NA	NA	NA	NA	107954	NA	NA	NA	NA	NA	NA	NA	NA	NA	NA	NA	578380	NA	968	NA	NA	NA	37434	NA	947499	NA	NA	NA	NA	37590	NA	NA	NA
QC_exp1-ileon_6b	NA	NA	NA	NA	11451	7808	NA	NA	8251	838	6088	356	40337	2598768	NA	NA	NA	595	774648	314	NA	458	563	1032577	346895	338518	955	1807	18080	834855	29573	NA	NA	NA	NA	248703	NA	245992	NA	335294	NA	53512	428	114946	120	NA	3881120	154166	116887
QC-exp2-ileon_5g	NA	9	132	194	NA	NA	193	741	NA	NA	NA	NA	NA	NA	NA	8380	35	NA	NA	NA	NA	NA	NA	NA	NA	NA	NA	NA	NA	NA	NA	56	NA	3368	NA	NA	547	NA	NA	NA	NA	NA	NA	NA	NA	NA	NA	NA	NA
QC_batch-exp123-exp1-ileon_SF_8a	NA	2	77	90	NA	NA	156	413	NA	NA	NA	NA	NA	NA	NA	2529	16	NA	NA	NA	NA	NA	NA	NA	NA	NA	NA	NA	NA	NA	NA	90	NA	702	NA	NA	265	NA	NA	NA	NA	NA	NA	NA	NA	NA	NA	NA	NA
QC_batch-exp1-ileon_SF_7a	NA	2	52	54	NA	NA	117	279	NA	NA	NA	NA	NA	NA	NA	2166	19	NA	NA	NA	NA	NA	NA	NA	NA	NA	NA	NA	NA	NA	NA	90	NA	285	NA	NA	262	NA	NA	NA	NA	NA	NA	NA	NA	NA	NA	NA	NA
QC_exp123-ileon_6b	52793	NA	NA	NA	NA	NA	NA	NA	NA	NA	NA	NA	NA	NA	986	NA	NA	NA	NA	NA	94654	NA	NA	NA	NA	NA	NA	NA	NA	NA	NA	NA	582114	NA	NA	NA	NA	NA	32229	NA	1138995	NA	NA	NA	NA	42235	NA	NA	NA
QC_exp1-ileon_6c	NA	NA	NA	NA	11667	8104	NA	NA	8556	615	6571	2721	44396	3075915	NA	NA	NA	4514	18105083	1736	NA	623	908	1039389	365228	326683	778	3715	20065	831290	45038	NA	NA	NA	NA	262477	NA	261498	NA	335592	NA	59426	2651	374692	62	NA	3810783	161379	120025
QC_exp3-ileon_5g	49144	NA	NA	NA	NA	NA	NA	NA	NA	NA	NA	NA	NA	NA	902	NA	NA	NA	NA	NA	111966	NA	NA	NA	NA	NA	NA	NA	NA	NA	NA	NA	603835	NA	1036	NA	NA	NA	38322	NA	962989	NA	NA	NA	NA	37606	NA	NA	NA
QC_exp123-ileon_pre.baileon1	7	NA	NA	NA	NA	NA	NA	NA	NA	NA	NA	NA	NA	NA	8	NA	NA	NA	NA	NA	19	NA	NA	NA	NA	NA	NA	NA	NA	NA	NA	NA	75	NA	NA	NA	NA	NA	40	NA	232	NA	NA	NA	NA	72	NA	NA	NA
QC_exp1-ileon_5e	81682	NA	NA	NA	12243	8524	NA	NA	9707	468	6929	854	41817	3039497	1740	NA	NA	1314	1408381	319	102087	632	675	1060036	366845	341601	996	2544	21582	897095	13656	NA	746547	NA	1191	273556	NA	265663	49067	342143	1582538	61725	201	132435	72	60684	3907491	162307	120622
QC_batch-exp1-ileon_SF_7b	NA	2	50	58	NA	NA	65	292	NA	NA	NA	NA	NA	NA	NA	2289	19	NA	NA	NA	NA	NA	NA	NA	NA	NA	NA	NA	NA	NA	NA	62	NA	289	NA	NA	280	NA	NA	NA	NA	NA	NA	NA	NA	NA	NA	NA	NA
QC_exp1-ileon_6d	NA	NA	NA	NA	10549	7183	NA	NA	5863	521	6793	1196	36264	2342931	NA	NA	NA	1058	236358	310	NA	573	553	1039910	345763	309894	664	2059	20200	778415	43051	NA	NA	NA	NA	266080	NA	271833	NA	326254	NA	36151	145	100139	92	NA	4362205	159340	106568
QC_exp1-ileon_5f	79477	NA	NA	NA	NA	NA	NA	NA	NA	NA	NA	NA	NA	NA	1749	NA	NA	NA	NA	NA	105260	NA	NA	NA	NA	NA	NA	NA	NA	NA	NA	NA	781033	NA	967	NA	NA	NA	48394	NA	1627186	NA	NA	NA	NA	57884	NA	NA	NA
QC_batch-exp1-ileon_SF_7c	NA	3	53	63	NA	NA	55	337	NA	NA	NA	NA	NA	NA	NA	2464	21	NA	NA	NA	NA	NA	NA	NA	NA	NA	NA	NA	NA	NA	NA	65	NA	336	NA	NA	351	NA	NA	NA	NA	NA	NA	NA	NA	NA	NA	NA	NA
QC_exp1-ileon_5g	84190	NA	NA	NA	NA	NA	NA	NA	NA	NA	NA	NA	NA	NA	1721	NA	NA	NA	NA	NA	107492	NA	NA	NA	NA	NA	NA	NA	NA	NA	NA	NA	750593	NA	1002	NA	NA	NA	49131	NA	1561620	NA	NA	NA	NA	60474	NA	NA	NA
QC_exp1-ileon_5h	83847	NA	NA	NA	NA	NA	NA	NA	NA	NA	NA	NA	NA	NA	1747	NA	NA	NA	NA	NA	106860	NA	NA	NA	NA	NA	NA	NA	NA	NA	NA	NA	739334	NA	940	NA	NA	NA	49454	NA	1553816	NA	NA	NA	NA	60510	NA	NA	NA
QC_batch-exp1-ileon_SF_7d	NA	2	50	52	NA	NA	55	311	NA	NA	NA	NA	NA	NA	NA	2446	14	NA	NA	NA	NA	NA	NA	NA	NA	NA	NA	NA	NA	NA	NA	64	NA	376	NA	NA	337	NA	NA	NA	NA	NA	NA	NA	NA	NA	NA	NA	NA
QC_exp2-ileon_6a	NA	NA	NA	NA	16623	10648	NA	NA	7022	1151	11540	10239	47903	1902090	NA	NA	NA	29244	848870	4443	NA	623	538	3465660	526661	361077	1916	2775	32169	686096	63347	NA	NA	NA	NA	187082	NA	271133	NA	452686	NA	48292	10367	20873	31	NA	2151650	222221	168578
QC_batch-exp1-ileon_SF_7e	NA	3	65	57	NA	NA	59	303	NA	NA	NA	NA	NA	NA	NA	2506	22	NA	NA	NA	NA	NA	NA	NA	NA	NA	NA	NA	NA	NA	NA	59	NA	361	NA	NA	365	NA	NA	NA	NA	NA	NA	NA	NA	NA	NA	NA	NA
QC_exp2-ileon_6b	NA	NA	NA	NA	17149	10904	NA	NA	8492	1309	11062	1119	25718	1896061	NA	NA	NA	1800	344664	898	NA	572	446	3609587	521895	346030	1648	1784	31969	697590	51493	NA	NA	NA	NA	179808	NA	277222	NA	447222	NA	48360	488	24649	62	NA	2171612	226091	163841
QC_batch-exp1-ileon_SF_7f	NA	2	55	58	NA	NA	35	343	NA	NA	NA	NA	NA	NA	NA	2482	24	NA	NA	NA	NA	NA	NA	NA	NA	NA	NA	NA	NA	NA	NA	63	NA	345	NA	NA	413	NA	NA	NA	NA	NA	NA	NA	NA	NA	NA	NA	NA
QC_exp123-ileon_post.baileon1	59765	NA	NA	NA	NA	NA	NA	NA	NA	NA	NA	NA	NA	NA	1056	NA	NA	NA	NA	NA	104290	NA	NA	NA	NA	NA	NA	NA	NA	NA	NA	NA	656923	NA	NA	NA	NA	NA	40838	NA	1307269	NA	NA	NA	NA	54525	NA	NA	NA
QC_exp2-ileon_6c	NA	NA	NA	NA	16686	10532	NA	NA	8460	1246	11091	850	18112	1957107	NA	NA	NA	739	630876	326	NA	529	495	3604086	527182	359336	1668	1325	32320	740693	54152	NA	NA	NA	NA	196563	NA	277671	NA	413344	NA	43940	246	14578	101	NA	2309773	229510	165001
QC_batch-exp1-ileon_SF_7g	NA	4	48	51	NA	NA	30	335	NA	NA	NA	NA	NA	NA	NA	2513	22	NA	NA	NA	NA	NA	NA	NA	NA	NA	NA	NA	NA	NA	NA	45	NA	393	NA	NA	413	NA	NA	NA	NA	NA	NA	NA	NA	NA	NA	NA	NA
QC_exp1-ileon_5i	79637	NA	NA	NA	NA	NA	NA	NA	NA	NA	NA	NA	NA	NA	1842	NA	NA	NA	NA	NA	108524	NA	NA	NA	NA	NA	NA	NA	NA	NA	NA	NA	786397	NA	NA	NA	NA	NA	46411	NA	1612949	NA	NA	NA	NA	57307	NA	NA	NA
QC_batch-exp1-ileon_SF_7h	NA	4	51	57	NA	NA	38	341	NA	NA	NA	NA	NA	NA	NA	2648	39	NA	NA	NA	NA	NA	NA	NA	NA	NA	NA	NA	NA	NA	NA	37	NA	379	NA	NA	451	NA	NA	NA	NA	NA	NA	NA	NA	NA	NA	NA	NA
QC_batch-exp123-exp1-ileon_SF_8b	NA	6	97	103	NA	NA	44	493	NA	NA	NA	NA	NA	NA	NA	3185	34	NA	NA	NA	NA	NA	NA	NA	NA	NA	NA	NA	NA	NA	NA	55	NA	1004	NA	NA	391	NA	NA	NA	NA	NA	NA	NA	NA	NA	NA	NA	NA
QC_exp2-ileon_6d	NA	NA	NA	NA	18289	10558	NA	NA	9213	1527	12098	2318	56515	2462897	NA	NA	NA	3642	20382431	2033	NA	524	576	3715326	562016	374878	1510	2727	40510	821355	82912	NA	NA	NA	NA	196666	NA	289442	NA	426803	NA	47791	2708	131399	47	NA	2379003	242964	167834
QC_exp1-ileon_5jb	71998	NA	NA	NA	NA	NA	NA	NA	NA	NA	NA	NA	NA	NA	1519	NA	NA	NA	NA	NA	95378	NA	NA	NA	NA	NA	NA	NA	NA	NA	NA	NA	684777	NA	NA	NA	NA	NA	42111	NA	1498136	NA	NA	NA	NA	52141	NA	NA	NA
Nacl-j3-exp3-ileon_267	68235	10	136	519	33490	9749	262	2682	5425	3705	28763	309553	117918	11315305	1766	4457	27	253864	60221732	72421	170650	1426	548	389133	184839	3465494	363278	4876280	47189	712699	262001	15	823992	1021	NA	206098	333	250928	112739	746085	1967118	137721	1966105	4046930	266786	130568	2803931	84155	33859
FECES-j3-exp3-ileon_280	158	3	83	109	14792	5941	131	1255	17846	474	10904	78612	40602	1864451	51	3291	7	40378	24282781	86760	45466	535	655	283964	632489	261212	879	40931	15500	753665	49882	14	445602	179	136	195139	215	281504	9006	370475	21984	53289	63978	1332105	61	102	2611187	226914	324433
ATB-j7-exp3-ileon_297	12	2	4	51	8406	3133	101	458	15638	415	4670	17526	19344	673542	6	585	5	1321	7511914	30846	65	366	482	221285	194581	82317	171	24017	15751	1085559	19990	13	139	137	763	233058	282	341714	59	240132	257	52378	10359	748350	36	86	4873500	22024	67630
AKKERMANSIA-j14-exp3-ileon_327	111052	3	46	74	14752	10494	102	273	10113	490	8982	179402	86866	3905964	244	1660	10	37521	35312929	201549	62600	214	885	551656	1288790	142530	4596	489158	29813	598017	152064	22	345189	87	8093	178512	149	234144	34514	88705	1369375	114310	74541	1882988	94	48736	955761	381201	148185
Nacl-j7-exp3-ileon_291	66526	7	90	112	8443	14729	202	415	5429	576	9474	71807	26652	2783979	790	2292	6	20060	43689022	43374	33541	456	990	7090935	321004	158341	6576	154269	20041	704978	60317	17	137747	653	1230	205732	149	248408	20889	183061	1223024	35979	75383	695256	83	61128	2398593	142843	76099
ATB-j3-exp3-ileon_273	38	3	1	44	12268	6201	127	232	15316	672	8460	3058	57138	1075396	6	632	5	12410	215085	196060	718	437	765	1475452	981368	188479	1074	773	14171	790015	25558	12	4748	46	352	196378	213	262703	199	221353	2232	86345	12993	168349	NA	76	2728837	93196	261548
FECES-j7-exp3-ileon_304	8105	3	159	116	23069	23033	161	573	13932	480	19404	206620	78603	6519063	180	2082	14	54474	49723279	86713	382581	673	985	941348	554824	234199	15555	363906	42753	641988	218960	20	1525436	145	1088	192717	179	238725	41568	518413	232696	191090	184376	3741816	1082	NA	1251012	276549	297703
ATB-j14-exp3-ileon_314	789	2	5	30	4791	2932	54	140	15323	311	4925	176	10411	565248	31	509	7	303	87623	4540	1082	686	312	661183	254611	87825	356	115	32091	534991	14335	18	8686	133	282	158990	192	216577	405	252489	33094	40127	706	133907	47	789	4814858	20749	138546
FECES-j14-exp3-ileon_323	90051	2	179	362	64854	41150	173	1264	8660	916	29192	112115	233199	4744761	2125	6464	24	201185	63028008	526599	267249	1023	3368	541319	576321	482520	11055	244307	32581	486155	565074	33	764033	2757	2851	221389	444	235361	166863	526432	2038876	172993	229510	2168197	335	59659	2112346	646628	143659
Nacl-j3-exp3-ileon_269	125302	5	236	526	27935	8808	216	1149	4719	592	21905	228006	45985	4155670	2474	5231	47	55726	60914117	28642	132473	1207	742	910866	342246	869714	8618	344448	15094	606943	209728	37	675004	5414	4797	186269	305	238570	65604	536575	1878879	50539	195907	1884060	416	99517	2998490	215750	63745
FECES-j7-exp3-ileon_301	3053	5	174	241	26216	16537	144	600	13518	366	18521	48650	125791	3843611	148	4240	12	43839	16569355	67128	120411	936	694	419064	408295	515729	2215	10732	30168	510915	154310	38	756712	153	1133	173199	273	222389	12881	447558	146699	135225	47061	1787306	119	67	3457169	426045	321894
ATB-j3-exp3-ileon_272	208	1	4	23	6614	4706	78	137	39676	459	5853	1598	31803	980342	10	564	9	9503	41639	14621	253	409	489	1281381	627567	69847	668	1043	22181	757832	4247	19	1479	53	155	190841	235	250662	91	251392	5425	51254	4078	182107	36	183	7150469	49983	211729
AKKERMANSIA-j14-exp3-ileon_329	44479	6	83	209	23249	12429	135	961	8609	626	40192	279247	62155	4010082	1116	2760	41	58343	82002664	47171	75980	770	487	496274	683166	1039638	11346	273048	21830	480374	217121	43	374781	521	2489	171434	440	250769	51321	635092	1287878	160662	130805	2495985	909	14368	1558643	236448	121915
Nacl-j7-exp3-ileon_290	15235	7	104	84	12111	13481	180	231	15309	402	6183	369962	135671	6334887	111	3693	3	45532	49078531	191012	4565	534	1145	1302054	1244877	149811	73833	1319867	41417	964654	223741	38	20806	689	1810	252525	175	319241	4795	273857	128052	201960	267889	1958731	2444	14876	2091447	372670	170596
FECES-j3-exp3-ileon_278	142	4	67	131	18439	5693	123	700	11225	692	14276	11634	27393	2784008	31	3104	11	56047	35538691	14854	107462	1229	491	302068	482479	1186639	460	3211	18087	756479	49151	35	725441	148	732	199528	247	276951	20194	621634	45464	41320	172472	494152	102	512	2623420	206838	287731
AKKERMANSIA-j3-exp3-ileon_284	37	3	68	50	69243	19134	165	508	20485	237	11153	4528	39191	1853753	12	1665	10	664	964638	17472	17354	833	593	298534	563457	266707	680	8952	65833	883515	21781	37	276490	144	3520	231740	380	296048	10077	467537	13181	52084	2282	204238	29	173	6654691	108491	285065
ATB-j7-exp3-ileon_296	79	3	5	36	8652	2912	100	107	14074	170	5855	603	12149	770001	4	596	3	3470	132657	15834	530	345	307	791214	396490	62830	222	293	16149	985817	16834	25	4476	35	99	240545	196	325838	215	264409	5342	34523	1971	102581	61	169	2090837	44032	130798
Nacl-j3-exp3-ileon_268	249546	7	110	513	17923	9547	176	1374	5982	994	11458	74234	38564	7966639	1697	3633	33	109031	33300959	12637	172107	835	594	326638	45797	2095169	22960	1109433	18846	530665	125885	55	939985	1004	210	194733	519	201722	115101	365744	2491906	38322	302332	1208292	15604	229959	5828112	53833	32711
AKKERMANSIA-j14-exp3-ileon_325	5695	2	585	111	19892	8038	185	346	15972	551	6085	28575	29960	1571760	137	2346	11	31088	21250215	27965	19945	456	404	2931681	354704	206140	2338	26681	55244	548969	70295	47	181250	1358	7091	264504	884	286138	12944	243074	417989	56084	42166	735503	79	10278	2602494	140428	96759
ATB-j3-exp3-ileon_275	26	2	7	50	14215	6424	95	386	15755	256	4840	431	53284	721179	3	609	9	1207	386370	108768	591	396	566	576794	346449	120772	227	261	25125	778618	21202	37	5551	155	289	205522	410	289334	117	279013	1612	64289	4864	270307	7	92	4505522	43825	138172
AKKERMANSIA-j3-exp3-ileon_286	152	5	25	15	24024	6667	34	140	14042	362	9687	387	7457	1497403	17	790	9	305	398548	374	53547	661	298	167130	587754	92578	340	520	13631	835585	16790	85	359666	16	67	208920	273	264432	6747	393689	27275	52271	184	33498	122	177	2524960	128680	432731
FECES-j7-exp3-ileon_305	9274	8	39	127	17388	18085	138	1314	9316	767	25480	47397	66702	7890297	315	1643	23	57235	30910975	41767	375148	922	931	732961	403746	283274	6297	63289	54823	479231	183995	82	1758078	40	470	161507	318	208277	57919	394689	459544	121692	123524	2492371	217	2255	990165	323737	230476
AKKERMANSIA-j7-exp3-ileon_310	1677	4	48	79	22863	50007	253	273	11127	1356	31802	39303	122127	4871277	139	1032	41	43391	86213664	133422	110056	944	1203	3873498	752515	590345	10996	35896	46312	459560	165968	62	769280	55	1354	171798	299	210591	30383	560363	176179	166996	193440	1951792	143	530	946197	195077	250324
ATB-j14-exp3-ileon_317	12	3	15	74	25004	7447	103	219	16960	440	28535	17605	26969	2365818	6	567	17	19542	6700279	15066	272	1354	493	700972	475321	1856790	724	12387	35313	583399	68854	43	1583	125	137	182461	242	231534	85	770484	491	311464	30038	1125546	51	54	4602674	31613	159229
Nacl-j7-exp3-ileon_292	61154	12	132	185	18557	12194	229	717	9128	1073	13601	342905	102800	6207483	598	5406	37	56622	67885298	146648	23137	1083	959	560692	450940	894928	47542	1065203	45512	689215	210146	51	127766	1966	863	195200	321	293708	14238	617994	691229	107604	497318	1915119	15488	87990	3418332	301604	97859
AKKERMANSIA-j7-exp3-ileon_307	1947	3	17	51	6922	6592	112	182	20315	411	11456	6759	13348	1401517	115	838	14	12082	218540	10416	152952	641	532	1910995	118967	83735	1785	987	15226	487065	28810	108	973052	49	22	153066	434	208810	40453	301631	173914	45977	10171	40986	38	1073	2879680	67239	96615
FECES-j14-exp3-ileon_322	151291	7	292	335	32161	18622	247	294	11341	847	11163	251860	151509	6671713	2691	4240	32	37033	7148119	130639	189805	688	1091	720553	1578151	322171	9027	1003458	77163	358500	108577	68	889109	2730	5060	153920	290	148322	122462	247522	1992686	150207	122317	1138923	66141	103784	1665604	686943	181447
ATB-j7-exp3-ileon_299	385	6	13	141	35109	6683	147	501	9387	959	41013	63205	56594	5359044	13	541	39	30429	62494041	21208	903	1415	622	934143	355432	891059	3229	82725	21036	678963	49567	49	6193	69	53	186489	197	231093	390	798354	14553	114915	46509	3835451	160	424	3880586	35346	199222
AKKERMANSIA-j3-exp3-ileon_283	165	9	344	428	36644	13382	374	460	9162	402	15802	9480	43876	2438997	14	2708	18	17348	3956346	64855	45484	699	611	528249	1140881	552941	768	2130	25279	697837	62472	72	347972	69	2699	171666	332	251359	7247	472330	30240	48219	40562	782321	26	205	2120925	289716	272386
FECES-j7-exp3-ileon_302	1992	4	161	92	29858	8795	185	373	11536	495	16221	10629	19027	2090600	194	1298	15	8532	45992686	20491	114389	612	487	2509559	213494	870464	1662	3950	22965	442711	50057	70	538348	190	214	149692	393	224588	35610	514706	187166	28573	60831	786327	34	891	1329006	203429	146829
Nacl-j3-exp3-ileon_270	133342	5	131	279	26215	5982	183	3030	6861	889	6922	43984	67689	6195022	2905	10268	28	242689	5963193	11734	196586	960	656	174830	196891	1325021	3592	106069	30807	401310	29390	70	689201	12308	623	145414	485	159713	66522	540388	1494899	67207	81245	152074	17554	104660	2565315	158665	47188
AKKERMANSIA-j14-exp3-ileon_328	101626	10	50	163	15137	18673	233	835	15592	1107	32529	35839	45945	4076979	656	1914	31	91278	65660228	21886	136547	832	659	10095340	539969	2117307	5220	18995	26744	469251	115423	86	516124	258	1966	204602	146	234687	80826	547032	1982323	48573	59064	1082984	168	103699	2594423	178020	98790
FECES-j3-exp3-ileon_281	285	2	28	103	17657	13362	147	921	12932	741	22014	4398	44063	2103209	101	4489	27	18411	402305	75620	173388	981	545	1004571	1159569	161714	1518	523	25168	935251	43468	75	1393350	63	847	219986	252	290619	35772	345381	120840	48206	24495	32570	64	931	1693523	214505	371715
ATB-j3-exp3-ileon_271	231	4	5	58	9878	6135	88	311	24977	221	7644	745	44057	969550	4	490	10	8871	104907	80390	210	497	699	1198507	975843	58576	438	303	22420	828862	29383	36	1259	122	288	194699	265	262638	83	187884	4233	70501	14543	305203	121	287	1577518	63955	317786
FECES-j14-exp3-ileon_324	174630	7	78	401	21796	7297	129	4330	7620	387	27586	13481	25923	4276248	3463	5046	25	128784	36212123	6313	221791	961	518	123657	77614	3885211	1366	13979	18479	441991	73806	90	1211157	1212	290	177676	232	210739	97460	466060	2515000	36517	29386	453678	136	158304	4125013	101235	30562
AKKERMANSIA-j7-exp3-ileon_308	553	3	152	60	9495	4151	123	148	17324	380	8641	997	11130	1147063	54	1149	14	1205	304605	1103	34744	658	518	10549018	310664	217172	3165	519	25423	469604	31659	70	141397	40	7772	137205	201	231690	7083	383516	108004	25399	307	12005	61	147	1756933	139409	122886
Nacl-j3-exp3-ileon_266	107554	6	84	113	23609	20749	133	555	15035	294	11167	269320	159760	7392072	3049	4533	35	99534	65399665	141996	109463	432	1237	2148600	1525431	278251	19374	654817	37989	803382	322681	78	524831	3312	2425	197438	659	285634	43795	303501	1690388	255629	423123	2350585	1159	100823	2162426	535384	197825
ATB-j14-exp3-ileon_316	79	2	11	51	16116	4587	86	173	19274	334	15390	1221	18664	1406829	3	561	16	2370	396629	7175	129	905	506	817090	367885	213883	302	1025	29192	528814	26150	77	1100	125	59	184121	235	203650	101	580150	1665	70330	4923	48095	57	97	2271867	37126	205445
AKKERMANSIA-j3-exp3-ileon_287	63	11	2349	385	90656	22592	210	1039	14485	434	20332	74814	71116	4817013	35	3748	33	21882	37866600	48195	24705	875	836	430143	750268	1176611	498	48766	37884	720305	75154	57	235013	249	164	185292	321	263556	5981	569564	17995	110549	86504	1460597	128	152	5789303	218435	238068
FECES-j7-exp3-ileon_303	3656	5	41	123	17904	15202	135	1094	11177	657	14791	77054	56009	4267261	112	2239	29	27734	50264773	50812	185191	715	900	1144012	360079	1258213	4799	119228	53523	493369	138336	51	794649	639	583	206939	720	242032	36655	469151	180966	149873	156848	1928874	22	1080	1598920	152791	214890
Nacl-j3-exp2-ileon_266	36980	4	80	71	16062	17761	304	260	14976	1120	11502	448536	121665	6616528	760	4072	17	99566	61067686	117686	83879	627	972	495643	1448444	183853	44560	1638483	64722	764726	265018	35	504311	485	2013	190328	378	291003	29280	324653	979990	191226	198902	5353989	129809	56821	2022807	663474	159909
ATB-j7-exp3-ileon_298	134	3	17	55	7908	3769	103	192	16984	473	8244	762	11394	1342889	3	586	15	2506	441694	3471	459	1082	569	840384	337154	1354154	464	711	53732	832764	19518	61	3068	64	72	221585	412	250519	120	660832	2494	37692	3303	17432	10	127	1807305	30304	191128
ATB-j3-exp2-ileon_274	100	1	10	37	16861	5883	191	147	14487	148	5267	390	24030	751254	19	915	8	170	9070052	1660	498	667	644	2339960	399629	145216	222	142	19636	785597	22488	23	3535	75	70	173861	137	259341	387	306698	12710	37301	148	27202	57	168	3241654	51293	149957
AKKERMANSIA-j14-exp3-ileon_326	48594	4	175	209	32716	14745	139	251	19362	403	15448	47032	46296	3329617	635	4295	17	83835	49603480	31961	253699	672	840	373912	444790	157357	3394	60254	58366	581413	129891	97	1622850	478	5605	189326	364	241917	65380	314896	1445420	95181	120279	775064	350	4156	1317050	301298	142120
MITSUAKI-j3-exp2-ileon_286	5551	3	61	88	10480	17550	323	966	12425	521	6700	887	29765	1474695	392	11838	11	928	212294	3853	70900	559	709	1772134	784836	151072	1326	1056	37147	990806	27155	21	656250	181	1856	224940	244	328278	13286	311381	652593	77178	594	232723	14	87	2645916	351115	211251
Nacl-j7-exp3-ileon_289	168761	22	407	244	20394	10498	195	482	8067	777	7254	267316	88608	5069170	1848	8156	23	156340	48929899	51269	154849	597	1365	660465	507589	327296	10578	818402	17660	868197	270847	84	415600	2404	2618	243247	426	335876	29669	275553	1343942	97610	398506	981994	1956	62102	2902695	326358	85912
MITSUAKI-j7-exp2-ileon_310	285031	3	26	83	6016	8927	258	1105	6326	503	6230	27342	42570	2916036	2762	16203	9	35094	38991983	8640	122042	590	604	94979	139808	149702	6033	32724	32996	497716	159700	22	1245674	145	5060	156587	198	232318	36152	356584	2541406	32374	26982	646770	103	64535	1386030	168828	77748
FECES-j3-exp3-ileon_279	335	3	54	92	11643	5665	84	830	15016	532	13880	124596	57344	3962586	22	1267	10	54707	49521306	35562	33623	1323	706	178071	436340	1221722	2606	279220	46710	786131	67074	60	366091	179	2049	178819	335	255874	8136	643399	32020	51745	269241	2075784	723	352	3066703	206781	227718
BURKO-j3-exp2-ileon_280	1821	2	52	87	23711	14089	353	984	15536	507	8286	314	40231	1653320	187	9474	8	631	135804	900	12664	595	395	170687	670078	143537	611	812	23054	1015169	20234	31	204295	274	146	252625	213	321412	2072	366022	284305	71042	145	15823	45	1191	3738135	212328	314545
AKKERMANSIA-j7-exp3-ileon_309	3030	5	11	70	16641	14384	118	265	9675	1126	30050	34581	47386	4272492	134	1156	19	49843	61211332	23238	155476	991	1066	1471017	450694	2142157	6665	22575	47941	460428	76184	89	1104354	109	2017	175005	306	225522	62913	663501	297736	71727	186322	1526517	158	883	1157373	123910	217655
ATB-j14-exp2-ileon_317	325	4	11	57	3743	7721	176	321	22519	446	6699	92	39669	855016	9	1039	4	1473	99872	18928	595	424	345	1836864	693948	90724	661	173	18672	617445	25804	26	6215	149	447	130981	165	214436	114	266370	15166	39340	1415	41270	43	86	1859811	41937	353758
ATB-j3-exp3-ileon_274	26	5	5	40	10343	7845	46	319	19370	434	8258	61825	134017	1792661	3	483	8	17853	24104277	313546	153	788	1141	1253949	819869	362892	731	67206	32484	739741	50161	83	832	84	389	175363	329	262196	48	461832	906	80755	65678	1739628	68	77	2179676	88650	290535
Nacl-j7-exp2-ileon_293	6761	5	168	109	12380	17446	236	265	9053	837	9728	306000	106910	5094176	191	3167	11	19769	57380125	94195	35810	599	631	351895	1260001	184213	6730	623703	34665	959601	265726	44	298632	323	4844	240870	203	394283	15093	193512	451438	179601	156575	3999640	13693	21817	1674730	643107	145025
AKKERMANSIA-j14-exp3-ileon_330	14975	5	147	173	34145	17150	125	734	9866	503	61000	329338	85819	5377675	360	1249	74	48815	79974238	70418	238483	1143	1003	1094628	807523	836797	9952	309168	31375	556939	237189	63	656886	640	5387	182165	289	247051	57617	677387	978974	179076	263797	3711479	867	20738	1413476	394495	152690
BURKO-j14-exp2-ileon_323	94684	9	49	167	49143	10806	251	1539	17461	755	10443	384406	170344	4768009	585	21449	18	113259	63915578	75565	181454	505	2040	529734	583181	184061	7257	1423601	43371	687188	328961	28	1495756	213	1015	152903	163	263361	66955	375828	1628703	45739	251631	2003377	12927	1118	1554253	621347	267242
FECES-j7-exp3-ileon_306	2414	4	38	88	16873	38220	113	715	12133	443	23190	24513	69170	4938234	82	1152	33	31962	76020699	43004	149400	563	722	2691609	857653	268415	5702	17200	32676	519458	122841	52	598416	57	1876	189097	445	222253	39643	296274	171981	176565	91296	284463	259	1200	1310571	305255	248568
BURKO-j7-exp2-ileon_304	1353	2	107	122	9959	15063	263	446	8436	5900	12235	7304	52391	2483839	46	3962	9	2092	66368696	12967	7633	510	553	935808	676765	321357	1348	5859	31412	590784	112285	16	45758	178	1666	183125	165	238160	14218	177127	193372	46433	6418	181751	152	5500	1069861	236226	116921
ATB-j14-exp3-ileon_315	123	1	3	24	4037	2974	56	142	27239	286	6139	310	29027	946855	2	480	3	1089	193547	13748	271	872	679	1034027	557678	495428	493	88	23311	530258	18375	64	1633	98	265	178445	283	223576	65	424560	4001	33024	3512	144029	8	128	3115952	32000	236527
Nacl-j7-exp3-ileon_294	122633	9	313	798	67578	6528	45	2651	4057	428	92154	329001	58283	7949072	2113	8099	71	174300	52896764	15956	131436	1274	606	219841	69210	5059220	28510	1335008	57146	894463	322552	69	454754	15182	516	318565	820	353442	75815	787512	1049389	91190	478736	3947252	13388	66726	6979600	153817	57895
BURKO-j3-exp2-ileon_279	544	4	190	171	18473	18329	450	1242	14122	550	6808	1118	124783	2035999	34	21500	12	1772	584194	156120	6921	408	613	298545	982590	88628	914	1345	32077	871833	47624	23	136817	262	2199	205511	210	281816	1688	223557	50117	67934	2201	99344	24	140	1835768	479273	271609
AKKERMANSIA-j3-exp3-ileon_285	73	2	84	74	33787	10585	84	1181	16325	280	14175	24645	62266	2255806	42	1554	20	32891	17544636	89939	48466	783	532	178802	507818	150861	282	24325	25882	919348	40065	52	468380	239	235	212208	471	301785	7095	306070	38871	61495	57351	796479	47	161	3087661	118878	317606
Nacl-j3-exp2-ileon_269	16301	86	3745	2519	175881	4592	251	449	2908	548	4889	1872	7581	600241	459	34152	10	55	1580060	217	198910	670	5718	1225887	12547	698220	3386	832	53174	567007	101026	23	288947	107258	2698	176920	760	245457	49924	445294	228218	6711	56	36215	65	547326	1532058	29134	29824
ATB-j7-exp3-ileon_295	20	1	6	24	7128	6523	56	124	27818	218	5641	3631	44321	1026196	3	515	4	7138	114535	36925	197	360	729	1129716	649245	47858	448	1079	24188	987333	13202	69	1174	108	731	264727	358	308167	42	198500	1125	65431	8726	216089	93	64	6894593	34498	249029
ATB-j3-exp2-ileon_273	276	1	14	66	6546	5709	168	845	16065	579	4815	194	4934	988299	8	925	9	89	307678	275	595	695	274	1607678	325343	650405	195	271	17594	728956	12072	14	4474	163	78	186297	131	264692	338	418088	11795	21900	92	2111	37	216	2566085	41820	189525
FECES-j14-exp3-ileon_319	186340	5	135	124	21693	15088	75	1237	14600	646	8130	247789	147750	6970885	3568	5008	26	77128	36010874	125220	217133	421	1174	440707	901580	234435	11406	1548627	28393	555056	288919	117	1168197	2754	937	207225	492	243045	93199	186718	2338806	126256	304356	2020343	4943	134987	1610692	481649	103689
MITSUAKI-j3-exp2-ileon_285	1122	2	39	80	15594	7221	176	570	10009	257	4531	193	16035	1006724	200	5243	6	117	117944	418	16513	527	550	579155	351904	123960	357	339	57358	1018789	17703	19	125505	369	757	242938	350	326673	7516	331661	435299	59258	69	57230	33	462	3524629	87077	160138
Nacl-j3-exp3-ileon_265	192646	11	161	576	10055	9251	117	1193	5531	515	9036	114873	71460	4528230	4419	3908	25	75258	43863425	28142	219820	602	1130	478619	211517	908882	4854	776171	42266	537803	231046	91	967509	2852	1004	179468	330	228650	104221	528608	2633583	17043	284932	851909	623	217930	1493637	160046	89404
BURKO-j7-exp2-ileon_303	2690	7	53	100	12511	15923	223	419	21257	940	18998	60783	135108	3332445	95	4268	26	20352	66853180	122916	8749	474	926	2394831	1125351	196833	4536	48974	36931	697667	142381	39	74038	239	4810	198853	273	276603	10178	392343	274658	130874	74762	3846835	41	850	2589030	327411	182682
ATB-j7-exp2-ileon_297	153	2	3	33	5297	1801	101	117	11817	367	5400	262	3972	471325	15	754	6	351	61614	254	1035	372	492	7661845	368353	93946	336	110	11328	928763	7978	25	6426	29	89	250432	141	319690	544	261129	34002	22328	107	11383	54	283	2683154	38239	139954
ATB-j14-exp3-ileon_318	83	2	26	100	50260	10087	64	558	14801	274	27959	146467	44884	3114111	9	583	19	28863	26284883	28911	133	1361	968	725266	454520	261329	1850	180180	30868	561217	70870	68	1140	273	1113	200425	565	262748	48	719827	1799	328218	57752	4829755	86	160	2045430	31951	183701
MITSUAKI-j14-exp2-ileon_328	50995	6	83	236	11624	21636	215	1693	6031	3542	16801	55433	226964	4678245	4660	4071	19	78841	67839662	102271	335597	895	2184	977754	525408	1227476	6238	152971	88019	555418	349266	27	810445	163	1020	179042	213	278707	180092	487391	2656197	63269	39754	2994072	144	344308	2563384	372743	134346
AKKERMANSIA-j7-exp3-ileon_311	1664	3	49	101	12503	8900	74	609	19220	630	19487	222852	95820	4659928	125	1169	22	37983	71311149	71703	88954	1337	1096	2775855	305602	752233	8218	515354	44114	516365	92372	86	615716	84	648	174547	370	245921	13360	676040	134438	65603	216486	4579681	9356	228	2153129	133462	148855
BURKO-j14-exp2-ileon_322	88036	6	34	67	21947	7033	113	492	7030	501	10163	13146	34709	2296647	703	9363	12	84858	318851	15930	189329	485	662	184593	250080	337885	1604	7084	30582	539119	92078	30	1542051	50	1179	150594	145	241152	74838	387498	2428899	25999	39307	124471	200	570	1451548	274148	360879
FECES-j3-exp3-ileon_277	190	2	3	28	6682	3387	65	183	10477	294	13206	1994	15485	1014098	56	787	12	25991	122671	11551	141230	655	563	633807	448182	118298	443	528	15361	1080691	22616	70	767642	47	129	289456	242	380822	17679	354342	54773	25202	13542	29997	23	355	3253893	69671	232647
ATB-j7-exp2-ileon_298	222	1	3	33	4784	2617	140	291	13074	391	3071	239	1126	245159	38	899	4	144	233119	241	873	478	266	2695162	371417	41731	186	222	10599	867304	5252	19	13728	23	128	222363	160	288830	634	240605	37083	86483	92	807	69	117	1494659	40906	103895
ATB-j14-exp2-ileon_316	829	2	5	33	4309	1630	86	318	8734	383	3553	315	2926	383353	12	1016	8	1451	33287	339	2830	328	450	1361864	429745	63070	179	120	12834	553957	5809	15	26851	168	36	139142	152	216187	1167	174929	48729	18457	96	11273	78	1831	1494010	37840	121845
ATB-j7-exp3-ileon_300	26	3	39	177	50016	5654	76	857	15803	889	84443	257236	59517	6310230	3	621	55	45670	62981080	24174	407	1736	784	942382	574486	1090027	6184	376510	33697	934653	147390	57	3551	178	223	235552	407	308946	88	829621	1275	242928	143415	8695289	116	146	2029836	73032	163523
Nacl-j7-exp2-ileon_291	63971	7	230	448	25472	20286	219	827	6862	956	15523	46164	70951	5586324	891	8019	29	105402	80532115	14106	177757	906	1132	372359	676507	1039057	8565	21656	44423	780058	272072	29	703353	684	2243	248376	440	278974	77459	482914	1476908	77346	136084	207079	133	72559	1706599	523329	120142
Nacl-j7-exp3-ileon_293	144416	18	332	312	33868	7780	73	895	4853	547	7245	213020	77879	7912047	1704	10160	23	52765	45436452	29096	100916	931	871	217804	103952	800624	40590	1475491	50212	775481	229163	79	225261	14714	209	221001	478	314924	26305	606322	731040	65751	471783	402588	15954	86822	5344560	178097	38456
FECES-j14-exp3-ileon_320	52385	10	121	238	37907	36772	126	512	12137	1147	32152	47312	174898	5214971	572	3378	39	140355	57050395	223969	168449	761	2948	576442	1116394	729891	7442	44112	49891	506429	325914	84	1184413	437	1682	197621	457	241325	113559	431097	2303764	115333	265926	1584503	263	101348	1466184	535028	114435
ATB-j3-exp2-ileon_272	286	2	4	77	4541	9130	124	482	12410	444	5206	360	8585	624409	146	853	9	1032	156153	898	3687	453	314	12688844	480190	264225	483	117	11870	701142	10810	22	37100	39	135	180361	126	265107	2117	333568	191479	23880	153	1499	94	337	1749073	56062	187614
ATB-j3-exp3-ileon_276	123	4	5	70	8314	14012	87	332	8728	454	10403	3222	39111	1452295	4	545	13	16203	338533	20329	263	443	682	1123666	915712	224836	667	1579	20866	703171	29179	63	930	47	2298	205364	341	239803	102	136709	5029	47363	2249	50932	18	191	2875346	101896	175668
BURKO-j14-exp2-ileon_321	68724	6	44	163	36002	12840	145	2887	9424	791	39717	25475	90723	4527309	814	9133	23	134711	74617452	27192	197476	1090	971	124543	122792	382104	2383	27120	35503	603723	154716	52	1546502	591	453	154456	133	265748	87339	835047	1953659	85624	88252	963727	65	72	2093919	154438	242357
MITSUAKI-j14-exp2-ileon_329	9398	5	3	35	11264	15346	177	651	9014	615	12105	13486	28877	3467508	784	3951	13	52547	57826217	5005	107979	856	541	351146	263917	441998	1398	12924	79272	526867	69870	51	643513	26	227	157242	329	246112	93043	510915	1550168	35005	18750	173451	90	47101	1475952	117984	133115
AKKERMANSIA-j3-exp3-ileon_288	214	7	499	205	50759	11766	139	1015	10472	478	22339	52919	53908	3725729	59	3440	20	131838	35282087	35634	46002	813	713	193785	725737	287007	559	33764	28312	853749	73469	70	560720	266	593	226148	423	283855	11727	633971	110007	103712	133971	2137061	59	247	2413199	171288	371745
FECES-j3-exp3-ileon_282	289	4	36	114	7737	4020	90	883	11194	386	11039	213	14499	2407889	21	1302	9	283	23663728	299	90498	992	489	138393	262706	1038113	450	895	18324	888498	19495	81	663700	57	230	225976	430	283289	13782	588493	93391	23676	504	34356	101	258	2513659	71471	186749
MITSUAKI-j3-exp2-ileon_288	3136	3	26	81	8732	8957	215	822	7586	1643	7932	200	3140	1722830	302	7472	16	130	548605	373	31753	799	308	4736868	536655	235010	1557	520	23508	702117	24705	32	338860	177	1039	186133	220	276524	4882	454333	438669	29307	83	8543	47	136	1487836	148171	165815
ATB-j14-exp3-ileon_313	69	4	11	23	8278	4326	59	112	23294	317	5800	72	32380	806214	5	575	11	1585	141385	28823	275	487	665	970741	571259	83991	306	130	23965	560111	17836	68	1762	139	195	168129	273	226105	124	288199	4997	38403	2964	104989	57	166	2522557	36949	225201
ATB-j3-exp2-ileon_276	993	5	15	44	9495	4071	128	309	13696	289	6408	150	17619	906509	30	1080	7	719	61623	1639	1183	606	350	1920050	436964	145725	215	239	29460	635724	21005	29	14923	366	76	177695	307	265232	554	429744	40883	44080	458	38102	28	839	1383014	41920	262560
AKKERMANSIA-j7-exp3-ileon_312	1722	4	64	90	18594	6572	66	508	13626	462	28098	24494	28626	2769006	199	2497	24	48254	49511385	15675	339851	1452	840	1363641	212906	642554	855	9486	31329	560785	67350	96	1819432	322	568	145516	319	228482	90034	697334	279281	28959	136523	1435843	107	2135	1778213	122353	164633
BURKO-j3-exp2-ileon_282	4953	3	36	75	9402	5204	226	430	6094	443	4689	85	4963	1196128	318	9189	9	62	252189	200	22188	375	432	159688	398796	97087	409	167	17689	857222	19520	40	336842	48	731	255318	167	335289	3800	183638	623296	13030	123	6733	56	2485	1818107	197900	97213
FECES-j14-exp3-ileon_321	229576	10	143	182	43367	18213	73	1623	7807	672	19286	142439	252042	5224172	2468	6654	28	105991	39083547	303923	232074	1123	2201	311007	669547	1282545	3615	241330	26059	551159	462311	115	1162018	1825	1390	219321	422	255437	53720	397950	1851241	140134	186559	1645191	229	115068	2956453	550957	95273
Nacl-j7-exp2-ileon_292	103815	8	311	632	15827	8362	201	881	4279	1575	6058	13455	38949	2445270	1904	8084	16	30920	53162967	8753	215550	417	593	283276	236191	367761	1157	3551	43613	897447	160577	49	707679	1020	971	223792	335	310124	92174	230338	1962185	18842	48980	64701	108	117641	2439126	270142	70556
MITSUAKI-j7-exp2-ileon_311	157415	5	35	92	10884	6312	162	1819	10358	655	4050	16477	30755	2314501	5149	10325	17	37100	49021459	2263	122751	881	1579	145136	104700	88124	4151	9423	28910	593530	251237	42	1493225	283	461	182466	272	236735	38194	570050	2180181	28939	28088	195532	126	116267	2914445	199193	94743
MITSUAKI-j14-exp2-ileon_327	20185	14	78	209	68275	82349	339	1675	12042	6008	86527	363226	77372	10441978	952	1684	133	92066	155180524	16335	105526	1292	548	2112807	225473	4744149	35987	1096537	53389	478577	321168	37	356644	244	353	221561	519	247384	88602	1313579	1565079	140592	316895	12202562	8011	211220	665548	85872	75018
ATB-j7-exp2-ileon_296	52	1	11	48	4556	3900	157	174	16640	508	8369	751	29657	825967	13	804	13	13632	22499	13035	309	495	528	2072085	594915	91185	312	272	17565	1051751	17668	42	3696	58	102	241779	182	339091	145	179367	6892	33771	4366	46355	90	164	3232773	48837	247235
BURKO-j7-exp2-ileon_302	4736	6	350	297	13330	7647	431	360	7590	734	9703	2575	23468	2227137	297	6884	24	2950	31702463	1520	26742	388	502	17093987	278568	182124	8970	2742	42335	531039	58962	41	206004	165	1020	150462	257	241673	27679	267923	892396	14424	4304	269559	73	8709	2531499	189718	83012
HIRAE-j14-exp1-ileon_403	167878	2	18	45	5094	6820	128	270	5231	955	8501	25102	28785	1513713	4035	4607	9	8692	24751023	6862	331095	668	429	1446522	222778	360719	5132	15755	31398	402768	68839	69	1255758	50	1823	137591	66	189406	138300	233987	2905411	14701	16708	542837	21	121070	2064578	84475	82612
Nacl-j7-exp2-ileon_290	28702	3	81	152	12031	13142	270	335	8434	1144	9723	39367	128658	5730978	669	2947	17	19386	52252931	46171	95739	331	858	528676	1148860	158191	1367	15229	51849	1075993	151287	51	398149	217	5299	269388	263	387666	49251	149548	897952	161284	68678	1427521	143	23117	4686840	541481	138571
ATB-j7-exp1-ileon_375	39	3	11	55	14896	5003	89	329	9293	405	28267	9172	11935	2195847	8	341	16	4366	565545	821	144	912	343	615876	295869	510420	340	3138	13601	499210	28183	21	1021	55	157	133897	143	188088	114	935974	2695	145240	2389	381041	15	106	1277247	24384	132958
ATB-j7-exp2-ileon_299	129	2	4	31	3558	2375	156	108	11762	309	3970	377	10495	509743	71	844	8	6364	41422	3033	1867	266	400	15094543	348172	34676	721	215	12228	946609	10460	37	10606	32	46	260849	221	341323	630	134968	69458	22167	827	5719	55	71	2095340	35122	190978
HIRAE-j14-exp1-ileon_407	57020	6	20	52	20885	9078	72	248	11878	579	8006	56368	11218	3399544	1645	4786	18	61887	43220374	2214	171333	473	708	182659	49683	298482	18994	191282	47912	583996	176707	55	1374162	359	1296	166602	91	217377	77325	362218	1529592	50596	52486	298559	1201	55527	3366186	45177	45750
BURKO-j3-exp2-ileon_278	491	1	72	111	16017	8441	252	498	14921	625	12387	829	16449	1519930	46	13116	16	1041	254055	433	4310	753	483	1243066	559924	121106	1422	688	19937	816242	26575	23	38966	185	61	185959	297	261300	1507	487706	39688	77794	265	28809	99	447	1607304	257219	207097
Nacl-j7-exp1-ileon_367	278421	8	192	439	13416	10990	130	550	2929	220	5126	81393	34962	3270696	3265	3198	39	25327	52890987	1969	201513	495	371	142507	178790	214646	5417	230992	28785	664236	149533	43	878538	1522	1439	198201	127	236305	45361	358902	2134261	18765	38525	540642	7263	111460	2449996	250444	43394
Nacl-j3-exp2-ileon_268	44207	6	35	77	11880	10771	181	418	5363	2648	14279	21413	38364	3898317	1078	3584	27	48266	71513681	8261	171879	812	424	601953	391270	879635	1765	15451	26384	647632	150200	44	878052	211	387	172566	260	307152	97894	715792	1872182	80562	57333	560126	159	50018	1645067	138227	82666
FRAGILIS-j7-exp1-ileon_389	24821	2	5	29	7869	2324	60	345	3726	350	7198	25358	17328	3009315	658	308	7	8965	55914789	2562	50044	457	383	1043426	37463	265143	15735	115201	7976	538359	37663	64	741843	42	137	139071	68	231579	45114	350868	1975666	28352	73671	1340313	2617	239663	2026868	25733	71483
MITSUAKI-j3-exp2-ileon_284	3396	4	12	58	4968	6197	149	531	7380	427	5512	390	33000	1044815	224	2973	9	387	103179	4775	47390	586	503	1217842	619707	427447	683	536	43323	921040	15093	53	485906	67	117	260277	173	331985	8034	408675	584700	23743	98	16222	40	1415	2752587	151548	218045
BURKO-j7-exp2-ileon_306	780	1	39	98	12324	10520	279	636	5873	5085	22066	480	21314	1878239	79	7291	11	349	26336257	495	10793	702	519	660073	223346	1148694	2660	1807	24048	610982	42889	38	58546	53	726	203624	376	244705	5027	456076	234800	27261	123	22189	97	2770	1718476	354146	82941
ATB-j14-exp1-ileon_400	67	NA	1	28	5279	2727	59	185	7327	195	4981	1241	11385	673296	8	442	8	4967	76768	1273	273	522	326	799982	369126	324964	281	308	14026	527958	11311	15	1416	23	23	159084	107	227681	118	356525	4301	40320	786	12414	69	211	1268985	32645	134665
ATB-j14-exp2-ileon_314	166	2	3	96	9601	3605	129	668	11073	708	9070	240	1481	706899	17	835	11	1339	325337	232	686	833	312	1382417	251423	770065	201	507	24040	717938	7899	19	5109	29	117	202953	192	250561	355	813256	12044	31754	129	574	132	236	1925569	36972	136606
FRAGILIS-j7-exp1-ileon_385	84197	3	6	31	9081	5977	60	440	7138	290	5567	9105	33379	1287313	1488	6367	12	31696	330564	7929	132653	323	1168	322278	424796	223227	2956	1653	7695	427161	92955	30	1465786	53	748	152436	72	188156	37597	206726	2053287	36256	12469	99041	481	73458	2370653	203900	79242
ATB-j3-exp1-ileon_343	62	3	4	17	5355	2788	47	161	19083	268	3224	64	6884	732692	4	321	8	222	68944	258	280	359	399	928631	299952	59764	266	182	7899	775981	2975	35	1758	40	217	229006	120	209751	173	104019	5584	31243	129	25097	27	115	4378582	40818	115409
MITSUAKI-j7-exp2-ileon_308	71687	3	17	87	6166	7370	165	841	4233	837	3043	5584	8727	2402484	1671	7483	6	5659	40258957	735	52132	494	781	114439	104397	1059707	465	5503	33938	622286	66421	32	653178	220	426	202456	308	266949	40273	397160	1596620	22059	6668	34764	87	116435	1928168	79985	56992
BARNECIELA-j14-exp1-ileon_415	101208	5	19	60	5251	6300	84	231	7870	330	5151	6019	26760	1445151	3433	3421	20	4588	1464443	2065	119398	451	451	8038772	447192	207647	8054	1186	28719	414708	53321	44	708737	756	3315	129952	111	184183	80110	302628	2003957	14897	2116	83107	75	80104	979868	196191	92555
ATB-j14-exp2-ileon_315	27	2	4	27	3368	5283	102	322	12670	427	2897	129	31227	489962	2	730	19	682	28469	7958	97	486	423	888699	461127	44352	526	86	25485	729223	12428	20	833	92	192	181585	352	246574	14	221259	1738	23233	349	50510	2	59	3963382	49907	150081
ATB-j3-exp1-ileon_347	67	3	NA	15	4030	2053	42	126	10977	430	2404	99	4168	543607	14	344	9	71	41291	200	355	195	183	1067632	358541	222148	623	108	14580	669335	8907	21	2270	20	119	187144	102	236078	149	154772	7965	21848	57	22077	20	157	2598893	37265	107546
BURKO-j14-exp2-ileon_320	8271	2	50	62	29182	4226	137	288	17488	616	11593	804	24390	1799005	187	4597	17	1657	60629614	1026	16673	996	682	15848776	631466	280042	3828	1759	38102	655514	84305	32	146802	183	1418	151573	308	248456	7452	569790	466784	23984	11926	197160	88	144	1715067	578543	147567
ATB-j7-exp1-ileon_377	160	2	3	11	3534	2700	43	72	13021	234	2824	7	12094	406408	7	389	12	215	19427	746	323	499	279	839383	223271	90673	252	100	9211	523889	7932	16	3413	48	67	140992	104	183060	120	208896	14372	19278	39	50454	35	777	2556727	23201	164832
MITSUAKI-j14-exp2-ileon_326	41061	6	62	203	6220	3547	131	1094	17963	206	7637	667	13603	1752829	7645	5480	21	981	9944035	454	170403	489	491	28858727	253001	220605	29198	1995	53419	504274	56731	51	544296	157	426	154975	262	245424	117340	332817	2168105	16406	353	33313	44	149976	2096576	105473	117735
ATB-j3-exp2-ileon_275	88	3	6	70	7122	3670	120	602	10256	354	6589	213	7169	883648	16	871	14	896	140966	336	733	383	315	2984440	402221	94064	393	171	15003	771313	15451	32	3616	63	56	183100	205	259315	254	173072	13940	25028	94	9225	87	262	1398324	42878	186270
BARNECIELA-j3-exp1-ileon_361	280	3	25	32	14563	17115	48	125	8477	346	10673	4444	98657	3265083	33	737	21	5148	57312685	133334	951	296	884	771115	824655	198539	623	6653	15625	1013285	60521	31	13030	43	4246	264011	87	281947	202	195546	49282	98575	30416	421568	184	88	3377913	184641	232981
BURKO-j7-exp2-ileon_301	1376	5	370	307	31200	23025	453	599	7732	1303	19697	291	5783	1495491	120	14729	25	179	642330	372	9191	743	291	8202918	363993	510084	4565	405	35520	592157	37363	29	78600	107	1521	185185	369	229596	12411	609220	434117	30026	187	6570	28	4962	1020613	161359	103383
HIRAE-j3-exp1-ileon_353	24	1	72	46	7419	6066	61	419	11021	279	3549	22	6520	1439183	17	3753	5	79	624620	190	225	678	320	1005327	199833	348964	333	229	7926	753722	8464	39	1050	85	327	212198	185	224231	239	367784	33131	13620	53	43795	92	70	3266463	67998	101505
ATB-j7-exp2-ileon_300	2068	4	11	54	4849	2605	169	627	13072	344	4487	235	4504	798505	61	1068	12	139	79497	446	3054	396	499	3839466	438358	133805	376	192	14605	803013	17715	40	15024	128	47	186029	294	265293	2412	288151	82854	23826	95	5565	69	5176	1761619	46395	215287
ATB-j14-exp1-ileon_398	26	1	4	35	6443	5095	65	224	12049	533	5346	100	20333	807696	15	336	16	2000	107977	4526	165	487	422	1290855	627250	91690	627	250	14992	684009	20980	24	1796	20	306	181405	153	193392	117	222787	3098	29696	790	12904	86	71	1401904	44502	250076
Nacl-j7-exp2-ileon_289	26165	2	53	81	11595	13758	194	198	11063	3609	11451	9148	340937	2930490	685	2567	29	39549	71775061	381946	113901	410	3592	7781273	1283690	112834	3169	6086	40839	989045	115654	42	425817	277	3800	274763	256	380397	60102	180325	1372360	60726	104790	465264	135	58475	2949523	790561	228172
BARNECIELA-j3-exp1-ileon_363	245	4	17	26	6832	8860	57	115	6199	603	4741	281	1790	1325826	15	717	18	149	415327	531	607	396	351	599714	517861	61437	385	493	19142	923321	31945	34	3827	21	3535	283399	109	269175	210	62008	17579	47182	183	27623	107	101	2069412	160969	118888
BURKO-j3-exp2-ileon_277	2127	2	49	61	13873	9891	336	354	12218	1048	4628	320	8830	1339179	197	14528	18	46	84255	286	13231	290	388	135675	468706	142742	537	213	28992	1041071	21526	46	186556	177	3044	277782	232	358641	3198	176074	415405	29281	213	6702	74	674	2880630	195715	120314
Nacl-j3-exp2-ileon_265	124245	12	266	359	22604	9260	225	1834	4738	2810	8049	24255	147165	4476471	4232	12975	32	57891	71716811	30062	220782	616	1381	269077	413875	355096	3821	12189	48486	773974	351450	39	630993	10418	556	196888	471	332352	81594	399836	2136696	33452	113404	196080	74	176680	1903112	532219	84398
HIRAE-j7-exp1-ileon_381	198041	1	9	24	5822	8000	26	186	7456	465	5467	13220	31545	2333589	2728	1041	13	14853	146088	11072	113473	269	515	328705	779474	75700	2127	5546	16148	421825	43919	29	1236534	27	3397	160323	131	171112	51255	95835	2583563	33927	9674	424543	1091	116994	1332593	236088	100427
ATB-j3-exp2-ileon_271	95	3	1	26	5394	3202	138	140	14696	528	7621	1636	36477	940916	9	849	9	11265	103343	3884	580	368	640	1788183	699327	85739	397	509	21694	800725	15969	36	3154	36	61	189446	277	267991	241	281874	6940	23739	3223	64160	125	143	3434060	75093	215130
Nacl-j3-exp2-ileon_267	9883	9	64	65	15741	18674	168	196	15567	268	10345	33469	217723	5301953	322	2151	19	51896	54073906	85536	71316	327	1380	1294740	2116419	257542	3622	13629	43411	796538	292549	60	201938	158	NA	194025	219	283246	12965	225399	348018	236964	113077	1581594	207	5888	2094829	611766	271801
MITSUAKI-j3-exp2-ileon_283	2851	6	30	107	13157	12296	176	855	13609	1400	8357	325	9531	1932595	138	6015	17	308	454807	401	30355	400	642	3390707	951905	197536	950	857	32131	1023623	24100	37	378599	150	377	258998	492	323534	6082	255320	336114	66219	253	42239	104	134	2277986	317288	220541
HIRAE-j7-exp1-ileon_383	236043	2	9	17	10473	4589	45	147	4122	333	5603	14973	42358	3249218	3879	1113	17	23490	49248651	5802	112323	1007	398	92124	78246	574093	9588	20532	13181	665281	53317	46	1817232	69	47	156901	128	214738	45247	641419	2702016	37739	38862	1205973	2940	174333	2027060	94773	41497
FRAGILIS-j3-exp1-ileon_357	260	3	646	55	37936	10535	88	144	6412	302	10006	5066	18807	1678186	7	890	20	4909	101907	2033	5830	426	290	854093	481120	159593	124	829	10369	863559	19268	43	37626	78	1611	258196	113	249661	427	312680	16455	41989	641	126829	56	396	2723913	99896	141682
ATB-j7-exp2-ileon_295	89	1	4	36	4039	7536	121	149	8375	522	4998	136	81950	699908	7	693	6	2210	59588	14394	424	428	495	5665559	750583	63886	738	111	17307	898833	2371	52	2132	34	68	260507	224	298614	153	110599	12995	15942	273	126488	90	143	4243970	87309	261948
Nacl-j3-exp1-ileon_337	226054	1	113	126	18029	3007	62	413	3570	350	2960	18354	30126	2146278	3423	5507	21	40524	46663932	3304	278871	646	390	152217	76140	366208	2091	11341	27573	666413	150355	38	1262778	2088	1495	212917	162	246903	91207	334667	2234644	9151	45558	22556	12467	188825	2855097	149496	25728
BURKO-j14-exp2-ileon_319	31849	5	24	66	7648	9604	132	241	6941	1375	7324	458	18647	2014001	261	7308	15	768	271787	512	64912	428	515	3849236	421082	181299	2894	1077	40039	589933	29248	56	639908	48	763	172437	238	225044	37771	234373	1542834	23213	464	76753	102	702	2846743	232774	142751
Nacl-j3-exp2-ileon_270	38310	11	584	939	110363	26526	246	1277	7565	1302	187094	224734	61880	11229417	1043	7472	205	79060	136604607	3565	77773	1431	573	229216	330825	2094894	11471	194610	44868	591342	362522	38	353023	2039	1626	181158	305	271421	29509	1371173	921775	250813	194413	10272633	15912	45514	2129793	337860	57985
ATB-j14-exp2-ileon_318	115	1	7	48	3012	1883	140	658	6647	454	4125	519	7273	515182	8	858	12	5462	26212	1488	241	354	430	1186112	336699	94963	604	249	14047	628724	10513	38	2156	55	55	158941	147	239757	113	126464	6308	8989	489	8714	27	65	1733763	36006	139766
FRAGILIS-j7-exp1-ileon_390	94294	1	8	30	20764	7996	44	534	4052	380	17524	55386	37752	5694965	1354	771	19	26533	85858947	3081	79608	1185	498	1343407	65283	939775	22627	275700	18651	444054	59652	63	1248295	119	49	146687	143	220468	31022	1016670	2632232	82447	106059	2934980	9169	299835	1457441	62918	37388
MITSUAKI-j14-exp2-ileon_325	25113	10	135	222	7542	7480	266	343	9981	810	14420	9341	29963	3284025	4136	2936	25	17107	45938545	5793	165806	537	568	20591807	921615	121712	4231	7571	54993	532653	108270	44	505336	174	810	155721	268	256511	108132	262632	1711961	49136	16607	682640	163	122817	2831468	232328	144123
BARNECIELA-j14-exp1-ileon_420	47915	3	7	45	8031	6629	84	298	7420	452	4770	38173	27709	3202780	2331	2572	14	18699	55662878	2754	83213	618	535	64075	84528	218429	7534	185051	15833	353350	87703	27	698643	172	958	133887	228	200885	72897	328519	1287091	32474	62889	1458160	3234	72868	1297697	82606	50700
FRAGILIS-j3-exp1-ileon_358	3576	2	18	16	9334	6379	50	85	18798	673	8611	1909	26762	1238121	117	1488	18	10852	77946	1519	271882	278	476	82969	120588	103847	574	752	10656	1003863	10302	53	1683596	24	366	275474	97	328679	35449	229120	359875	27206	560	68837	273	2860	6134548	72331	174080
MITSUAKI-j3-exp2-ileon_287	4263	7	42	86	10557	6465	151	795	9312	442	7549	418	51255	2313173	169	6637	19	989	49140769	3420	28819	588	501	1700941	806620	265577	898	2899	29832	860462	61781	58	428745	169	103	233079	325	333046	4259	433855	244436	47275	697	219044	106	413	2200862	241508	247200
BURKO-j14-exp2-ileon_324	19355	5	48	141	23447	3871	116	1367	16095	505	8010	2055	68121	1826920	446	8702	24	3988	51935925	10731	74739	828	1420	101485	180507	220261	540	3437	26894	627965	95009	38	699936	321	488	147373	417	227446	31478	589048	975005	20138	8868	334223	19	235	2292440	220767	177698
Nacl-j3-exp1-ileon_339	31925	2	31	47	7528	17971	50	215	6290	1147	9901	10813	48562	2751916	716	1294	22	14937	56724065	15020	71958	445	843	1867231	613577	174966	2885	5297	27704	659185	99058	44	311829	107	2390	237313	135	231626	35724	239152	1287712	46186	10686	163964	108	32059	1862791	218238	145652
MITSUAKI-j7-exp2-ileon_312	143541	7	35	119	8054	6671	129	841	7461	1421	5191	3914	27024	1348722	4338	16779	34	22207	14799676	4842	156574	547	1022	200873	350669	140201	918	1897	39039	591730	112223	22	1353575	209	4672	162786	417	216954	64256	326243	2468935	19539	12110	41708	159	75630	1620203	168753	143624
BURKO-j7-exp2-ileon_305	1105	5	93	156	13771	5915	217	287	7177	686	7832	8267	38010	1699835	130	13192	34	13957	44797525	6704	8547	906	778	158217	307406	237070	6855	4085	50904	641453	72612	41	77652	191	10638	190441	683	262632	5877	280998	335344	10480	57833	795376	24	4031	2057132	235339	94024
Nacl-j7-exp2-ileon_294	119783	17	240	648	11972	7615	222	1597	4909	1542	8114	9934	65034	2540872	2292	6376	26	23769	40429245	17758	170958	313	1564	223708	360257	228515	741	4224	28001	901501	198441	65	507744	1940	964	224622	272	305834	104589	178050	2117462	13970	37787	69189	70	231915	2284382	506555	76989
ATB-j3-exp1-ileon_345	169	2	2	18	6547	3552	40	208	6604	346	3198	NA	2326	1046211	36	341	11	753	269046	308	1910	360	415	4109890	527933	252229	883	609	11392	615878	11678	31	19066	21	86	190997	94	220316	547	185195	89491	12106	142	11975	133	110	1650697	63205	118310
MITSUAKI-j7-exp2-ileon_307	180429	4	56	178	19959	12595	184	811	8384	603	14471	11009	92347	2184175	5663	17609	24	67407	705435	15609	114962	652	1249	218621	422589	1138390	1724	5413	26789	684766	139491	52	1499365	289	978	198363	744	249370	64939	577553	3147975	62907	23042	80397	130	443915	1375483	254496	194771
Nacl-j3-exp1-ileon_341	128175	3	16	72	6701	5905	36	198	3865	1206	4554	11186	18858	2626919	2432	2845	3	15732	567969	460	213883	390	262	196991	157415	320875	649	3884	15325	631863	22432	29	881686	345	668	220734	120	210883	161519	219251	2437457	34014	1599	42059	60	123907	4778008	142066	27748
ATB-j14-exp2-ileon_313	27	2	10	14	3993	2368	122	265	23231	212	4938	154	26519	672777	5	824	11	2247	13573	828	96	512	618	1068126	309380	61787	120	81	36443	731105	459	23	1498	108	213	176749	459	230635	41	350636	1391	17754	363	49811	56	93	6350407	31139	207319
Nacl-j7-exp1-ileon_371	59658	5	48	68	8509	5945	47	316	3921	378	6036	46	10844	1708160	839	1352	11	220	371126	380	76995	472	NA	389715	328047	98381	744	521	16292	860368	47073	37	263812	164	3389	266655	101	305859	32698	145154	1213243	15723	153	7701	37	36829	3054752	302681	95103
BURKO-j3-exp2-ileon_281	3487	6	135	245	19892	10594	245	1217	6552	198	8924	6343	45053	3428501	351	19810	28	5300	43825105	3352	34772	798	629	152571	711434	520679	540	6969	41998	792909	61300	39	480230	450	1310	220354	414	301978	5071	619853	557179	42586	14526	389756	117	8935	2303017	250317	201577
BARNECIELA-j7-exp1-ileon_393	32514	3	2	5	32671	6554	29	9	5306	441	56617	24607	31652	3948059	1301	132	6	47613	79391047	3519	44956	1467	389	1518846	127327	1336259	3595	20395	18047	544176	96107	25	471892	7	236	146874	35	187901	17611	1135490	992013	138582	53898	2578949	2668	17822	1640346	77717	91176
MITSUAKI-j14-exp2-ileon_330	14374	15	348	567	12156	7313	333	658	7496	553	37358	35921	33258	3773705	2432	2504	45	21283	93445675	4560	69608	748	571	26381437	254987	727902	6953	23719	48086	494392	120684	19	366287	258	973	148662	474	266761	40491	506230	1484662	13503	105730	2100239	98	39060	1845883	85184	100911
FRAGILIS-j7-exp1-ileon_387	142717	3	10	24	5020	4119	44	632	7268	1064	4062	17224	18927	3317275	1845	2129	7	86564	43575014	959	185870	1083	526	77736	47635	1106472	1416	13460	34498	432657	106695	29	1602308	105	389	136469	182	206803	57591	816871	2119646	19627	14513	43736	549	248211	1969849	64078	57817
FRAGILIS-j3-exp1-ileon_359	228	2	388	39	23884	9400	72	105	8388	633	4280	1688	16065	1625357	20	968	19	573	189707	541	16880	321	297	599216	359712	111904	542	1036	20473	1012248	19703	40	160003	78	1481	251230	174	307414	2619	108405	19872	66797	190	46362	119	2619	4124055	54599	98957
HIRAE-j3-exp1-ileon_351	85	3	138	27	8973	5642	36	204	11521	391	6486	2756	23357	1288404	40	1986	13	8167	120573	4068	206	422	424	307479	369450	50108	586	659	16133	927042	14165	29	855	90	134	249113	125	272076	556	219987	44927	35435	2992	108267	103	42	3792853	98649	205532
FRAGILIS-j14-exp1-ileon_412	26648	2	116	94	12417	5170	73	635	4479	219	1811	32762	27037	2301314	800	2763	12	77626	36053085	5850	55399	280	455	89461	118679	65717	1845	63954	8028	548036	119499	52	207779	1431	NA	163286	109	230096	26541	128473	386609	33223	71305	848036	661	49751	1725294	159051	46696
ATB-j7-exp1-ileon_373	67	1	2	12	7047	2653	22	80	10083	581	6477	3007	15650	1094597	9	359	10	12569	117858	723	346	682	612	1384558	500120	242277	702	1821	16528	490989	13117	39	2451	21	56	161204	137	194654	145	424284	4683	20822	1577	75858	294	159	1781423	44777	113233
Nacl-j7-exp1-ileon_369	313968	2	37	44	7185	6026	70	221	4117	560	4030	15492	21466	2893988	2197	2569	17	10325	204475	1151	254295	307	634	255580	330756	84838	1354	10487	13575	821638	54837	24	846738	305	2889	217185	126	254357	81795	103798	2390509	26739	10666	185377	215	58811	2361879	312323	89003
FRAGILIS-j3-exp1-ileon_355	665	2	30	19	4764	3539	23	49	9582	412	3469	115	3426	741218	36	489	10	142	88769	211	28478	504	363	2816056	133284	171890	468	131	9175	852903	10554	38	280067	51	2037	273474	104	256264	2780	204514	55935	10164	83	6355	133	2781	2892231	47848	139595
ATB-j7-exp1-ileon_374	19	2	1	15	5130	7527	15	86	12751	422	4551	1082	93391	919648	4	362	10	15964	102352	78880	198	185	604	1541260	938303	48156	621	882	13226	512544	17783	35	1042	18	287	151248	160	184303	76	93250	2616	28347	1766	170235	84	13	1390011	85977	252502
ATB-j14-exp1-ileon_401	55	2	7	29	6941	4669	64	134	13691	536	9632	8	16639	1322285	4	406	16	332	278358	683	243	593	390	1023212	566518	115008	515	344	12989	592914	24580	25	2666	22	328	172351	235	225970	151	293132	3097	29012	139	41297	73	140	1338829	41795	248616
BARNECIELA-j7-exp1-ileon_394	1673	3	8	42	13934	7211	38	178	7786	368	14406	5031	39194	1447776	191	1064	19	15490	220984	2586	7853	1131	333	1097704	102359	852331	936	1992	16007	516341	14814	49	14792	15	145	175202	43	201000	7539	683604	168502	38127	1308	29728	410	7533	2362789	56876	126625
BARNECIELA-j3-exp1-ileon_364	1722	3	6	55	4942	6969	31	80	6151	375	6172	52	8715	1378683	212	1614	11	260	141150	286	11041	343	409	595673	322279	50216	404	373	10707	1066448	20347	43	109488	20	2305	300179	131	313174	1238	79791	283164	17215	120	19992	74	65	1765348	167044	153204
Nacl-j7-exp1-ileon_370	198568	6	102	111	12682	7371	40	236	3439	357	3849	10628	14367	1811433	3528	3896	19	41430	359464	968	274004	377	330	191427	149783	49123	876	2015	24452	729998	69321	19	1146972	1571	716	206383	166	250882	104666	179942	2240728	10615	9718	8522	127	129019	2514704	183946	41498
Nacl-j3-exp1-ileon_340	73713	3	64	119	22601	6310	46	537	4781	697	6142	14858	18018	2930972	2135	5005	26	84719	44814192	1096	170469	752	412	233920	147161	318660	1075	7081	33897	675537	134210	30	845445	1033	1377	251467	142	236103	32501	595499	1424440	37048	30208	70427	2175	62324	2340895	197160	36290
HIRAE-j14-exp1-ileon_408	92006	4	19	49	17429	8226	64	331	4717	329	7767	61942	14367	3167501	2489	6771	27	20925	49161633	1758	247301	435	605	219759	268433	250132	5588	64771	20061	494327	206855	47	1698457	304	2845	148971	108	195602	121684	287213	1924430	53178	48939	243509	124	149189	1816454	170394	57053
HIRAE-j7-exp1-ileon_379	283756	3	12	28	4124	2698	36	427	2666	371	1611	4174	36160	874871	5612	3011	8	4793	94212	4609	109757	472	355	107239	181897	288607	1437	1296	12659	392211	37988	19	1542510	67	1178	138787	93	174136	39805	261326	2295443	10058	2855	158886	326	39815	2127827	157588	49152
FRAGILIS-j14-exp1-ileon_409	136453	2	27	52	8360	19018	43	364	8068	720	5486	13506	553340	3281781	4299	2817	22	47368	25227498	197342	228693	583	6666	644212	1120183	138887	1861	14882	35192	523964	360578	48	727989	886	1344	155393	117	193561	101918	202525	2140147	63968	17634	577070	624	332916	1320468	1033838	277511
HIRAE-j7-exp1-ileon_382	443556	6	14	58	25966	7768	60	1547	4660	486	65337	68052	35680	7708107	5539	2155	27	129567	75972179	1897	373537	1226	657	75290	36494	4523298	26016	213307	21753	415059	223281	63	2304466	111	693	135398	142	210309	159073	1230826	2924333	93961	87553	5364403	4540	96665	1139422	54155	47067
HIRAE-j3-exp1-ileon_352	200	4	15	32	10307	4998	31	367	6859	428	7938	4127	11155	1962745	66	1237	12	9621	179869	276	676	695	479	122072	248429	296318	413	1519	7702	1085242	9854	23	2071	35	46	303898	158	287733	662	265458	158090	20983	554	53186	232	68	3745961	94427	116205
FRAGILIS-j14-exp1-ileon_411	10056	3	31	31	17709	5288	47	361	4590	136	2764	76	3557	1304906	478	2145	11	163	190112	223	34651	394	267	90423	95246	95864	324	779	10840	430194	35386	28	223250	436	NA	131215	121	199880	20928	208592	295666	28744	186	79459	57	31283	1165203	112372	40692
BARNECIELA-j3-exp1-ileon_365	1206	3	20	39	8124	13037	34	126	6631	2720	7300	129	3487	1846105	116	747	20	190	426601	529	1438	321	273	579386	315781	397783	735	510	18495	931771	21394	38	10372	13	710	248273	177	249645	669	205831	272636	17344	157	5087	109	77	1302768	150251	181109
Nacl-j3-exp1-ileon_338	17402	3	238	181	13228	4203	68	473	4995	1246	3294	14129	48834	2746222	660	3980	10	31884	42074221	5507	53057	743	524	199501	218811	256996	287	5525	15115	642538	170812	38	225298	519	NA	205102	128	244351	30984	367566	435349	32612	24082	200707	54	23422	3097638	243087	35187
ATB-j14-exp1-ileon_399	2912	1	7	26	5675	3291	31	210	20785	350	4537	142	15613	977156	32	359	10	419	76252	478	2679	493	500	685652	423804	178009	508	103	12866	598344	974	17	13840	13	214	169649	204	203469	1071	317747	54231	29060	117	168261	43	678	3191223	39100	142226
HIRAE-j3-exp1-ileon_349	258	1	60	44	13114	10261	48	170	5452	319	7713	133	7787	1542852	56	3152	18	233	217264	442	610	386	286	820845	509131	227680	470	516	10409	917215	13239	25	2149	22	355	270211	182	267525	705	173995	187236	22294	184	30735	157	89	1608344	103167	142177
BARNECIELA-j14-exp1-ileon_419	78832	3	5	53	8839	12588	58	374	8814	907	11594	1634	8435	3269016	1379	1588	21	238	382350	145	118860	712	314	160410	338718	676095	887	3963	42295	360011	49303	37	1214468	88	2195	165248	292	184906	122840	467001	1986052	19031	247	17193	NA	122836	805116	234012	91808
BARNECIELA-j7-exp1-ileon_395	1487	7	8	11	8686	17445	44	77	11489	918	9499	11687	12303	5072473	53	948	19	3429	2552453	2193	4155	436	708	1369745	777671	99852	1341	17358	36563	559828	82978	46	18350	27	393	186012	133	185264	1580	187667	143688	125746	1240	44059	71	201	1489987	257211	266624
BARNECIELA-j7-exp1-ileon_391	668	3	71	60	13929	16461	27	569	7719	606	5179	5406	151018	3450171	39	974	11	3830	5932606	97738	1747	645	2189	1436144	467191	213768	1694	10592	28938	506041	374385	38	4482	54	633	169286	89	214639	425	276724	35085	129290	2042	499309	91	96	3046058	260186	258512
BARNECIELA-j14-exp1-ileon_416	268675	5	20	70	5189	4033	45	671	8493	512	6100	1119	8466	1529092	7055	4957	13	845	175888	278	201340	671	308	165058	295800	585936	5949	1143	27544	392904	31928	48	1235740	163	959	134058	120	184517	130636	420535	2868820	8350	164	38324	101	130641	1046723	175966	146485
ATB-j7-exp1-ileon_376	9	2	6	23	4413	3144	35	364	18624	294	4055	64	15791	854018	7	484	11	1110	42501	1079	121	414	343	1042269	521362	513004	236	245	16385	591084	14378	16	824	90	63	156828	192	208349	63	377156	1048	21901	174	66072	114	77	3080943	32431	160212
HIRAE-j14-exp1-ileon_405	68781	2	15	48	8098	9355	28	375	10879	412	10096	2878	13172	2623340	2366	4007	23	1649	29307999	133	265958	616	310	1458477	155373	429049	2836	4676	50626	598562	54745	48	1812845	134	686	175668	146	202979	152656	476974	2252147	40165	717	26503	124	171679	1361931	70170	70569
FRAGILIS-j14-exp1-ileon_414	9212	2	57	34	7450	1788	47	378	10701	166	1106	55	8776	838472	578	2009	11	64	263192	90	25743	268	457	45764	66056	35716	417	305	9369	380811	27821	25	101588	989	NA	140604	121	192989	10164	102339	233522	7653	141	39521	103	20775	2803599	108714	29278
ATB-j3-exp1-ileon_346	47	2	7	25	7547	4265	28	194	12647	358	3793	NA	19819	907120	3	371	10	108	100773	431	124	369	445	758851	509227	82242	348	127	12884	879559	16060	28	1035	55	259	187624	155	235416	142	199065	2053	35027	135	69215	21	108	4512710	41331	152212
Nacl-j3-exp1-ileon_342	74178	5	80	106	10034	7547	51	306	4388	1091	5682	9081	64132	2431061	1559	2587	22	20678	45884740	16845	161782	427	1603	190892	417557	313004	663	5689	36542	671651	166293	39	936584	414	3707	216234	83	227684	92864	246335	2036035	19976	27160	282991	1599	103687	2266788	402310	87195
HIRAE-j14-exp1-ileon_404	38002	6	53	95	12982	24237	44	771	7394	937	6436	83927	51940	8824796	314	6118	9	15090	83124250	2871	36590	699	1086	143543	227560	253989	8345	169288	46396	623651	292982	44	1071964	94	378	169858	85	229449	8007	493568	784281	140898	45340	5981796	4410	8112	2063079	95173	128416
ATB-j3-exp1-ileon_344	71	2	4	36	8526	8083	27	130	12557	564	4198	2768	71765	1256556	5	454	7	8678	179397	17233	183	356	687	1557029	697924	97296	269	1041	19118	823105	19559	34	1632	56	138	233154	201	232386	90	176666	5340	44652	1730	103577	120	122	3379570	76187	188647
HIRAE-j7-exp1-ileon_380	183587	2	18	48	4433	3455	27	414	2977	307	1298	11945	11535	2450039	6169	2800	14	4631	37012078	635	145061	612	366	45188	37504	730050	300	28364	12728	448750	84590	20	1384424	74	181	126547	200	181378	35980	426869	1812241	12267	4461	292393	104	33794	2263362	31877	33686
FRAGILIS-j14-exp1-ileon_413	84416	3	126	131	15563	7723	31	820	7337	512	5895	12654	21692	3347434	3936	4997	19	21871	47841707	1365	219231	602	497	245738	171159	390146	788	9743	31448	535808	136989	35	1055081	3567	2153	169497	173	235778	140700	369461	1598851	35262	24240	528896	141	116593	1254025	209884	59888
HIRAE-j3-exp1-ileon_350	232	3	156	31	14309	8822	23	208	9967	425	4276	17	16661	1432040	83	3355	18	255	105587	228	307	329	293	677629	327517	143460	297	391	13686	957429	12014	30	1412	78	178	274716	209	295209	722	134286	163940	21831	87	31385	93	65	3033721	103566	130686
Nacl-j7-exp1-ileon_372	69491	6	170	106	15694	6432	32	396	8830	342	3186	6524	16694	2096735	1912	4376	9	8718	24232059	1425	128794	497	614	189448	182623	81995	251	2745	28388	913501	82455	37	475426	3091	2729	244830	220	306836	41524	219250	1108243	36899	9847	120471	50	45419	3572456	254698	64166
FRAGILIS-j7-exp1-ileon_386	3181	3	64	34	7755	6951	46	232	14565	355	6544	299	33382	2324813	320	1054	18	537	330440	358	10849	414	371	6315503	950303	61563	1461	2011	25299	650435	38450	28	397665	62	420	211757	196	201127	5123	191038	485642	66163	247	126530	39	5122	1691721	274061	184914
FRAGILIS-j3-exp1-ileon_360	1487	3	49	50	10608	20439	36	177	6837	949	8668	148	12457	2614930	75	1495	19	466	409720	500	59755	235	425	1389410	492131	137292	343	3442	28380	911119	35597	43	454814	40	7437	234339	151	270989	8409	126708	152362	63223	134	11323	50	8409	2023241	96846	185856
ATB-j14-exp1-ileon_402	30	2	3	14	4985	3407	27	96	10279	445	4010	81	9243	767669	13	414	8	283	91350	414	88	513	409	431657	278070	106554	197	85	26761	793701	12737	37	375	61	266	181490	136	199998	30	303473	1115	22168	189	106269	83	61	2530698	19071	128687
ATB-j14-exp1-ileon_397	257	2	5	16	4655	3237	35	69	12288	599	3197	40	17924	681986	21	409	4	1525	39083	3673	696	386	407	541474	311647	76841	277	108	9480	714444	15919	21	5583	28	406	176586	109	204313	348	153453	16101	20842	421	80376	59	249	1824905	24901	137322
BARNECIELA-j3-exp1-ileon_366	777	4	3	26	6434	6132	22	106	5505	784	9113	1598	9819	1138880	10	475	15	5654	171880	568	3240	322	536	521128	271397	300499	431	618	14590	1002673	12469	28	25140	20	713	276648	182	296760	283	127409	56529	12863	244	89594	118	44	2241244	87149	122708
HIRAE-j3-exp1-ileon_354	377	3	36	31	8016	8298	35	376	3868	575	5280	1280	8428	1198106	21	2703	16	2687	179673	254	852	327	511	1006177	228062	141870	395	799	10064	867636	6161	38	9156	28	165	265572	162	254011	512	133410	95511	26243	108	53790	101	2455	2690621	78862	100223
FRAGILIS-j3-exp1-ileon_356	438	5	725	92	25767	6992	52	103	15706	676	6513	370	44619	1735316	9	1260	20	1189	8928591	2949	10375	223	739	3135306	528832	90186	302	639	16362	954351	25856	42	112684	70	2984	242764	147	261132	948	148694	22053	42134	1558	240897	99	110	4168473	155961	171646
BARNECIELA-j7-exp1-ileon_392	101442	3	6	22	4082	3474	18	205	7433	915	6684	4748	17169	1647826	12231	1475	12	57244	192715	1021	257066	500	560	57143	57020	607244	641	1727	20726	509448	33074	44	1282194	7	313	152572	99	171688	225830	342010	3138929	8609	1719	176669	53	81971	1554670	48306	131930
BARNECIELA-j3-exp1-ileon_362	353	4	44	28	5841	5373	22	86	6827	2109	7035	143	8256	1489801	18	1056	11	285	204384	298	625	247	543	679225	575269	330127	301	420	13398	986329	26673	33	2072	24	2597	276325	157	289954	103	94819	26024	20673	132	48647	54	59	2021597	123181	127215
BARNECIELA-j14-exp1-ileon_417	287834	3	7	125	9355	8683	58	858	20556	519	19306	25262	27259	6117618	7205	3710	25	18721	56061942	1424	327151	1169	654	133022	166161	3203734	12181	53269	41821	407345	65217	48	1642833	234	348	154611	171	216784	261611	953172	3362586	14715	23407	2183530	4731	13407	1707184	144263	138223
FRAGILIS-j7-exp1-ileon_388	126359	3	12	50	7318	4110	19	837	4055	303	13328	7828	9913	3635789	1316	1231	20	5220	72465582	184	119944	944	340	192421	85488	2167538	533	11191	13331	468485	61755	42	1281208	45	149	139915	143	221467	52447	753399	2624191	18720	1279	388123	117	323330	1774127	55662	40962
BARNECIELA-j7-exp1-ileon_396	31333	5	100	120	19084	9318	26	349	17424	776	17201	13100	44661	5484227	4597	5456	22	4725	55987863	746	56237	1024	474	1910090	424784	564452	10523	22093	50156	583571	63310	38	622719	183	1431	163767	229	212444	26593	717051	1849485	52539	2780	780681	162	19442	3574907	165967	108509
HIRAE-j7-exp1-ileon_384	339265	4	17	20	12298	8489	28	158	5701	554	10110	16653	146302	3483651	6744	3183	12	23664	280928	16127	213563	795	816	125736	322100	493461	3663	10994	18273	489531	93971	72	2867085	69	1168	144521	129	186622	122908	549355	3582771	33780	6573	629438	4434	362080	1694915	683198	82658
Nacl-j7-exp1-ileon_368	98307	4	125	71	13722	14499	40	200	9510	1397	5970	32266	107852	5684890	898	2435	30	20162	68675896	27540	84039	331	1500	465690	1053043	53296	2871	26440	31539	1125405	208701	35	331353	390	6715	274195	251	321835	27710	125190	925595	157716	50288	1209228	4237	20952	2075461	638054	203212
FRAGILIS-j14-exp1-ileon_410	62258	7	162	255	16395	4586	33	658	5121	328	3484	2322	9597	2070158	1902	2444	10	5332	26217875	180	116074	491	384	174043	221349	110946	458	4298	9925	524809	71052	39	896236	820	1129	165420	138	204991	46007	209518	1097741	19196	133	139243	178	54400	1523336	281297	59724
HIRAE-j14-exp1-ileon_406	188500	2	11	32	4913	4766	37	317	4074	734	4288	9422	17405	1604653	1867	3290	16	13209	140899	1633	298402	452	388	191147	96900	231536	1354	2861	18545	560060	53225	47	2040396	75	1133	167391	115	213428	179633	182382	2404073	21213	4399	104153	705	8832	2021438	59117	148629
ATB-j3-exp1-ileon_348	859	1	5	32	6024	3857	24	87	10615	299	5237	1962	16127	1217538	319	427	19	5533	90344	1120	11040	662	527	20326016	484224	126612	1264	530	18432	848079	15589	34	135731	22	169	213478	178	235272	5486	185848	473775	25577	1296	165971	59	724	2113979	68186	133337
BARNECIELA-j14-exp1-ileon_418	131160	5	46	73	16904	9912	49	476	15698	913	3236	35976	64029	3997774	2323	6945	23	21552	46613489	15679	152439	397	916	259024	769492	162122	2910	20121	42583	491440	156718	42	579939	1221	3211	162077	400	212570	49781	191883	1000184	74532	77889	1119634	200	49788	967543	437764	150822
St_SCFA-exp3-ileon_pre	NA	25221	25033	25277	NA	NA	4869	15623	NA	NA	NA	NA	NA	NA	NA	2141	4	NA	NA	NA	NA	NA	NA	NA	NA	NA	NA	NA	NA	NA	NA	3308	NA	13128	NA	NA	26562	NA	NA	NA	NA	NA	NA	NA	NA	NA	NA	NA	NA
St_PA-exp2-ileon_pre.paileon2	NA	NA	NA	NA	NA	NA	NA	NA	NA	NA	NA	NA	NA	NA	NA	NA	NA	NA	NA	NA	NA	NA	NA	NA	NA	NA	NA	NA	NA	NA	NA	NA	NA	NA	12	NA	NA	NA	NA	NA	NA	NA	NA	NA	NA	NA	NA	NA	NA
St_BA1-exp3-ileon_pre	17	NA	NA	NA	NA	NA	NA	NA	NA	NA	NA	NA	NA	NA	19621	NA	NA	NA	NA	NA	1598	NA	NA	NA	NA	NA	NA	NA	NA	NA	NA	NA	1642	NA	NA	NA	NA	NA	44084	NA	32521	NA	NA	NA	NA	67038	NA	NA	NA
St_AA_exp3-ileon_pre	NA	NA	NA	NA	2551	4648	NA	NA	5199	209	50	587076	2713	117259	NA	NA	NA	648	1483934	33	NA	75	585	372	491	444	16	64722	4225	445286	1187647	NA	NA	NA	NA	97354	NA	65780	NA	285	NA	14894222	29666	17238	1328	NA	6288715	306	225
St_BA2-exp3-ileon_pre	14985	NA	NA	NA	NA	NA	NA	NA	NA	NA	NA	NA	NA	NA	6	NA	NA	NA	NA	NA	NA	NA	NA	NA	NA	NA	NA	NA	NA	NA	NA	NA	105769	NA	NA	NA	NA	NA	26151	NA	490	NA	NA	NA	NA	2415	NA	NA	NA
St_PA-exp2-ileon_post	NA	NA	NA	NA	NA	NA	NA	NA	NA	NA	NA	NA	NA	NA	NA	NA	NA	NA	NA	NA	NA	NA	NA	NA	NA	NA	NA	NA	NA	NA	NA	NA	NA	NA	13	NA	NA	NA	NA	NA	NA	NA	NA	NA	NA	NA	NA	NA	NA
St_PA-exp2-ileon_pre.paileon1	NA	NA	NA	NA	NA	NA	NA	NA	NA	NA	NA	NA	NA	NA	NA	NA	NA	NA	NA	NA	NA	NA	NA	NA	NA	NA	NA	NA	NA	NA	NA	NA	NA	NA	24	NA	NA	NA	NA	NA	NA	NA	NA	NA	NA	NA	NA	NA	NA
St_SCFA-exp3-ileon_post	NA	37123	29028	32722	NA	NA	3919	19343	NA	NA	NA	NA	NA	NA	NA	1447	8	NA	NA	NA	NA	NA	NA	NA	NA	NA	NA	NA	NA	NA	NA	5055	NA	15014	NA	NA	30139	NA	NA	NA	NA	NA	NA	NA	NA	NA	NA	NA	NA
St_AA_exp3-ileon_post	NA	NA	NA	NA	1169	17187	NA	NA	6377	377	318	17317	928	127079	NA	NA	NA	113	150641	38	NA	94	327	483	1144	766	23	304	4120	180586	524732	NA	NA	NA	NA	61098	NA	42824	NA	345	NA	21950436	3348	8855	20	NA	7856628	688	2159
St_SCFA-exp2-ileon_pre	NA	38146	37867	35687	NA	NA	6578	17894	NA	NA	NA	NA	NA	NA	NA	3775	3	NA	NA	NA	NA	NA	NA	NA	NA	NA	NA	NA	NA	NA	NA	6978	NA	14864	NA	NA	29053	NA	NA	NA	NA	NA	NA	NA	NA	NA	NA	NA	NA
St_AA-exp1-ileon_pre	NA	NA	NA	NA	1702	3402	NA	NA	4037	219	16	539307	1124	145153	NA	NA	NA	595	2048897	34	NA	27	575	230	561	1292	33	74660	5475	1047058	829425	NA	NA	NA	NA	151047	NA	61391	NA	762	NA	19395717	24693	62754	301	NA	1926289	287	79
St_BA2-exp3-ileon_post	15609	NA	NA	NA	NA	NA	NA	NA	NA	NA	NA	NA	NA	NA	10	NA	NA	NA	NA	NA	2056	NA	NA	NA	NA	NA	NA	NA	NA	NA	NA	NA	111713	NA	NA	NA	NA	NA	21747	NA	530	NA	NA	NA	NA	3324	NA	NA	NA
St_BA1-exp3-ileon_post	17	NA	NA	NA	NA	NA	NA	NA	NA	NA	NA	NA	NA	NA	24113	NA	NA	NA	NA	NA	3953	NA	NA	NA	NA	NA	NA	NA	NA	NA	NA	NA	NA	NA	NA	NA	NA	NA	35933	NA	35696	NA	NA	NA	NA	59570	NA	NA	NA
St_BA1-exp2-ileon_pre	447	NA	NA	NA	NA	NA	NA	NA	NA	NA	NA	NA	NA	NA	22348	NA	NA	NA	NA	NA	2452	NA	NA	NA	NA	NA	NA	NA	NA	NA	NA	NA	1620	NA	NA	NA	NA	NA	35501	NA	30897	NA	NA	NA	NA	58720	NA	NA	NA
St_BA2-exp2-ileon_pre	14181	NA	NA	NA	NA	NA	NA	NA	NA	NA	NA	NA	NA	NA	11	NA	NA	NA	NA	NA	2654	NA	NA	NA	NA	NA	NA	NA	NA	NA	NA	NA	107178	NA	NA	NA	NA	NA	52679	NA	683	NA	NA	NA	NA	3461	NA	NA	NA
St_SCFA-exp2-ileon_post	NA	44748	36437	36242	NA	NA	5137	19403	NA	NA	NA	NA	NA	NA	NA	2893	10	NA	NA	NA	NA	NA	NA	NA	NA	NA	NA	NA	NA	NA	NA	6008	NA	15180	NA	NA	29813	NA	NA	NA	NA	NA	NA	NA	NA	NA	NA	NA	NA
St_SCFA1-exp1-ileon_pre	NA	20051	17311	18443	NA	NA	3241	12258	NA	NA	NA	NA	NA	NA	NA	1559	8	NA	NA	NA	NA	NA	NA	NA	NA	NA	NA	NA	NA	NA	NA	4218	NA	5968	NA	NA	12496	NA	NA	NA	NA	NA	NA	NA	NA	NA	NA	NA	NA
St_BA2-exp2-ileon_post	16828	NA	NA	NA	NA	NA	NA	NA	NA	NA	NA	NA	NA	NA	135	NA	NA	NA	NA	NA	2484	NA	NA	NA	NA	NA	NA	NA	NA	NA	NA	NA	118934	NA	NA	NA	NA	NA	34701	NA	759	NA	NA	NA	NA	2465	NA	NA	NA
St_BA1-exp2-ileon_post	412	NA	NA	NA	NA	NA	NA	NA	NA	NA	NA	NA	NA	NA	24378	NA	NA	NA	NA	NA	2753	NA	NA	NA	NA	NA	NA	NA	NA	NA	NA	NA	882	NA	NA	NA	NA	NA	32058	NA	33843	NA	NA	NA	NA	54069	NA	NA	NA
St_BA1-exp1-ileon_pre	529	NA	NA	NA	NA	NA	NA	NA	NA	NA	NA	NA	NA	NA	25040	NA	NA	NA	NA	NA	459	NA	NA	NA	NA	NA	NA	NA	NA	NA	NA	NA	60291	NA	NA	NA	NA	NA	31670	NA	33683	NA	NA	NA	NA	53177	NA	NA	NA
St_BA2-exp1-ileon_pre	17020	NA	NA	NA	NA	NA	NA	NA	NA	NA	NA	NA	NA	NA	7	NA	NA	NA	NA	NA	3576	NA	NA	NA	NA	NA	NA	NA	NA	NA	NA	NA	123526	NA	NA	NA	NA	NA	32644	NA	598	NA	NA	NA	NA	33257	NA	NA	NA
St_PA-exp1-ileon_post	NA	NA	NA	NA	NA	NA	NA	NA	NA	NA	NA	NA	NA	NA	NA	NA	NA	NA	NA	NA	NA	NA	NA	NA	NA	NA	NA	NA	NA	NA	NA	NA	NA	NA	23	NA	NA	NA	NA	NA	NA	NA	NA	NA	NA	NA	NA	NA	NA
St_PA-exp3-ileon_pre	NA	NA	NA	NA	NA	NA	NA	NA	NA	NA	NA	NA	NA	NA	NA	NA	NA	NA	NA	NA	NA	NA	NA	NA	NA	NA	NA	NA	NA	NA	NA	NA	NA	NA	40	NA	NA	NA	NA	NA	NA	NA	NA	NA	NA	NA	NA	NA	NA
St_AA-exp1-ileon_post	NA	NA	NA	NA	833	14813	NA	NA	5221	235	42	154	635	127487	NA	NA	NA	49	31015	43	NA	77	336	438	963	2017	16	59	3010	194039	327871	NA	NA	NA	NA	90762	NA	41559	NA	604	NA	29197464	4764	12163	42	NA	3001992	882	2145
St_AA_exp2-ileon_pre	NA	NA	NA	NA	1947	3111	NA	NA	4160	177	17	679990	1010	130786	NA	NA	NA	543	2679008	28	NA	19	652	242	616	616	54	92055	16660	5972205	881751	NA	NA	NA	NA	246699	NA	152759	NA	392	NA	21314150	18282	66642	442	NA	6151714	603	79
St_PA-exp3-ileon_post	NA	NA	NA	NA	NA	NA	NA	NA	NA	NA	NA	NA	NA	NA	NA	NA	NA	NA	NA	NA	NA	NA	NA	NA	NA	NA	NA	NA	NA	NA	NA	NA	NA	NA	16	NA	NA	NA	NA	NA	NA	NA	NA	NA	NA	NA	NA	NA	NA
St_SCFA1-exp1-ileon_post	NA	27174	19478	19451	NA	NA	727	12783	NA	NA	NA	NA	NA	NA	NA	1608	9	NA	NA	NA	NA	NA	NA	NA	NA	NA	NA	NA	NA	NA	NA	2250	NA	7850	NA	NA	16576	NA	NA	NA	NA	NA	NA	NA	NA	NA	NA	NA	NA
St_AA_exp2-ileon_post	NA	NA	NA	NA	2146	16454	NA	NA	4893	455	181	492	522	146138	NA	NA	NA	119	78595	93	NA	31	NA	1286	1233	1333	27	69	5531	177257	509773	NA	NA	NA	NA	57802	NA	61465	NA	745	NA	28757741	5133	18443	39	NA	8059570	1012	2552
St_BA2-exp1-ileon_post	16844	NA	NA	NA	NA	NA	NA	NA	NA	NA	NA	NA	NA	NA	16	NA	NA	NA	NA	NA	2935	NA	NA	NA	NA	NA	NA	NA	NA	NA	NA	NA	117777	NA	NA	NA	NA	NA	27214	NA	884	NA	NA	NA	NA	27216	NA	NA	NA
St_BA1-exp1-ileon_post	387	NA	NA	NA	NA	NA	NA	NA	NA	NA	NA	NA	NA	NA	24592	NA	NA	NA	NA	NA	1416	NA	NA	NA	NA	NA	NA	NA	NA	NA	NA	NA	58686	NA	NA	NA	NA	NA	23365	NA	33408	NA	NA	NA	NA	41760	NA	NA	NA
[truncated: 112 more columns]

## Sheet: AreaQCCorr
Sid	12-dehydrocholic acid@5.31-ba	2-hydroxy-2-methylbutyric acid@3.48-sf	2-hydroxy-3-methylbutyric acid@4.59-sf	2-hydroxybutyric acid@2.50-sf	2-hydroxyglutaric acid@13.00-gc	2-oxoglutaric acid@13.01-gc	2-oxovaleric acid@14.62-sf	3-hydroxybutyric acid@1.66-sf	3-hydroxyisovaleric acid@7.82-gc	3-methylhistidine@16.87-gc	4-hydroxymandelic acid@15.21-gc	4-hydroxyproline@12.45-gc	5-aminovaleric acid@13.52-gc	5-oxoproline@12.34-gc	7,12-dihydroxy-3-oxocholanoic acid@7.00-ba	Acetic acid@1.79-sf	Acetoacetic acid@13.46-sf	Adenine@16.18-gc	Alanine@6.91-gc	Allantoin@16.53-gc	Alpha-muricholic acid@5.91-ba	Alpha-tocopherol@29.50-gc	Anthranilic acid@13.42-gc	Arabinose@14.16-gc	Arabitol@14.80-gc	Arachidonic acid@23.73-gc	Asparagine@14.11-gc	Aspartic acid@12.35-gc	Behenic acid@26.40-gc	Benzoic acid@8.76-gc	Beta-alanine@11.15-gc	Beta-hydroxypyruvic acid@14.00-sf	Beta-muricholic acid@6.17-ba	Butanoic acid@5.28-sf	Cadaverine@4.55-pa	Capric acid@11.44-gc	Caproic acid@12.09-sf	Caprylic acid@8.95-gc	Chenodeoxycholic acid@10.27-ba	Cholesterol@29.50-gc	Cholic acid@9.09-ba	Citric acid;Isocitric acid@15.80-gc	Citrulline@15.77-gc	Creatine@12.79-gc	Cytosine@12.37-gc	Deoxycholic acid@10.48-ba	Dimethylglycine@5.43-gc	Erythritol@12.29-gc	Ferulic acid@19.18-gc
BlM-exp3-ileon_pre	NA	362.017	62.509	115.769	NA	NA	4366.443	101.918	NA	NA	NA	NA	NA	NA	NA	2788.121	55.411	NA	NA	NA	NA	NA	NA	NA	NA	NA	NA	NA	NA	NA	NA	9005.69	NA	686.365	NA	NA	2364.367	NA	NA	NA	NA	NA	NA	NA	NA	NA	NA	NA	NA
BlM_exp3-ileon_pre	43.317	NA	NA	NA	2373.548	54.776	NA	NA	3264.195	196.784	8.538	3.641	125.974	55972.923	1.692	NA	NA	2.16	7411.054	0.524	32.561	14.444	169.48	517.185	227.669	520.461	1.142	0.226	3471.52	1055186.139	863.55	NA	42.872	NA	4968.577	249325.507	NA	350331.062	347.658	517.336	115.156	55704.46	0.105	7.832	1.001	436.972	6218391.488	222.293	663.188
BlM-exp3-ileon_post	NA	1.008	3.76	11.828	NA	NA	201.546	104.492	NA	NA	NA	NA	NA	NA	NA	2056.67	2.049	NA	NA	NA	NA	NA	NA	NA	NA	NA	NA	NA	NA	NA	NA	179.217	NA	378.32	NA	NA	1242.82	NA	NA	NA	NA	NA	NA	NA	NA	NA	NA	NA	NA
BlM-exp2-ileon_pre	NA	104.733	78.064	105.056	NA	NA	8008.781	81.08	NA	NA	NA	NA	NA	NA	NA	5411.774	12.561	NA	NA	NA	NA	NA	NA	NA	NA	NA	NA	NA	NA	NA	NA	10538.898	NA	434.969	NA	NA	1243.897	NA	NA	NA	NA	NA	NA	NA	NA	NA	NA	NA	NA
BlM_exp2-ileon_4a	783.345	NA	NA	NA	NA	NA	NA	NA	NA	NA	NA	NA	NA	NA	15.431	NA	NA	NA	NA	NA	555.639	NA	NA	NA	NA	NA	NA	NA	NA	NA	NA	NA	4887.756	NA	NA	NA	NA	NA	95.399	NA	6494.349	NA	NA	NA	NA	456.978	NA	NA	NA
BlM_exp2-ileon_pre	NA	NA	NA	NA	2353.63	24.341	NA	NA	3094.61	1927.104	15.417	1555.739	404.538	143649.323	NA	NA	NA	62.719	479550.568	22.714	NA	5.934	458.218	1877.141	3243.094	1481.479	1555.794	7012.503	14408.383	2165941.487	4320.369	NA	NA	NA	69.513	328019.726	NA	424907.625	NA	1021.697	NA	34131.288	466.296	1544.203	265.178	NA	2399290.497	1742.061	344.66
BlM_exp1-ileon_pre	3649854.861	NA	NA	NA	2597.152	93.553	NA	NA	2889.657	136.406	4.836	83.905	241.746	116597.57	31033.408	NA	NA	33.984	10708.468	1.939	6010331.76	7.348	866.374	99.189	47.724	2264.483	48.402	1756.272	4960.135	1026315.071	1115.786	NA	50510266.987	NA	414.623	261120.566	NA	296331.616	1150291.934	1180.281	66192251.382	25269.293	10.906	109.621	272.858	1175127.236	3044787.557	1172.646	269.259
BlM_exp3-ileon_post	22.25	NA	NA	NA	1061.623	49.778	NA	NA	4291.514	702.758	89.978	58.5	499.476	95829.194	9.725	NA	NA	37.073	5474.361	9.776	56.087	23.385	136.813	877.183	1473.981	4499.41	5.975	20.513	3927.729	1102075.236	1157.841	NA	534.195	NA	283.459	290304.711	NA	422689.298	30.893	770.332	1083.572	4376.794	10.567	184.867	2.97	206.697	6080385.157	1974.755	12382.753
BlM-exp2-ileon_post	NA	1.521	9.926	33.261	NA	NA	329.124	249.59	NA	NA	NA	NA	NA	NA	NA	4828.039	13.856	NA	NA	NA	NA	NA	NA	NA	NA	NA	NA	NA	NA	NA	NA	147.792	NA	347.677	NA	NA	759.287	NA	NA	NA	NA	NA	NA	NA	NA	NA	NA	NA	NA
BlM-exp1-ileon_5a	NA	269.331	115.962	69.563	NA	NA	10291.841	232.485	NA	NA	NA	NA	NA	NA	NA	2133.471	10.232	NA	NA	NA	NA	NA	NA	NA	NA	NA	NA	NA	NA	NA	NA	2369.664	NA	1167.391	NA	NA	733.424	NA	NA	NA	NA	NA	NA	NA	NA	NA	NA	NA	NA
BlM_exp2-ileon_4b	786.652	NA	NA	NA	NA	NA	NA	NA	NA	NA	NA	NA	NA	NA	16.355	NA	NA	NA	NA	NA	942.164	NA	NA	NA	NA	NA	NA	NA	NA	NA	NA	NA	5193.578	NA	NA	NA	NA	NA	24.819	NA	6755.177	NA	NA	NA	NA	414.936	NA	NA	NA
BlM_exp2-ileon_post	NA	NA	NA	NA	1576.926	32.521	NA	NA	4350.809	134.734	81.732	747.986	350.819	170637.978	NA	NA	NA	226.593	94860.284	67.131	NA	13.341	461.767	3583.276	6994.31	6524.399	4.938	92.523	9912.915	1082322.743	3048.913	NA	NA	NA	395.022	272347.631	NA	466056.86	NA	1425.354	NA	1747.472	331.107	1983.267	36.592	NA	3475801.086	4204.625	16849.064
BlM_exp1-ileon_post	NA	NA	NA	NA	1583.219	46.099	NA	NA	3064.037	183.105	106.165	427.65	353.391	150039.868	NA	NA	NA	188.031	258362.087	109.671	NA	58.335	88.423	247.202	1445.655	12120.994	35.11	133.335	4109.216	847006.86	2143.883	NA	NA	NA	17.315	268590.925	NA	345974.181	NA	1764.732	NA	3916.098	1000.585	1931.809	34.981	NA	2691993.969	1437.57	16137.364
BlM-exp1-ileon_5b	NA	1.065	15.42	10.151	NA	NA	228.851	122.814	NA	NA	NA	NA	NA	NA	NA	2202.98	23.282	NA	NA	NA	NA	NA	NA	NA	NA	NA	NA	NA	NA	NA	NA	233.984	NA	731.061	NA	NA	613.453	NA	NA	NA	NA	NA	NA	NA	NA	NA	NA	NA	NA
BMl_-exp1-ileon_post	4.627	NA	NA	NA	NA	NA	NA	NA	NA	NA	NA	NA	NA	NA	13.081	NA	NA	NA	NA	NA	29.557	NA	NA	NA	NA	NA	NA	NA	NA	NA	NA	NA	407.157	NA	NA	NA	NA	NA	138.813	NA	1264.223	NA	NA	NA	NA	103.426	NA	NA	NA
QC-exp3-ileon_5a	NA	41.246	1172.057	1200.665	NA	NA	576.295	5816.78	NA	NA	NA	NA	NA	NA	NA	23791.015	61.555	NA	NA	NA	NA	NA	NA	NA	NA	NA	NA	NA	NA	NA	NA	199.341	NA	15517.024	NA	NA	4208.531	NA	NA	NA	NA	NA	NA	NA	NA	NA	NA	NA	NA
QC_exp123-ileon_pre.baileon3	236833.978	NA	NA	NA	NA	NA	NA	NA	NA	NA	NA	NA	NA	NA	6016.227	NA	NA	NA	NA	NA	496434.485	NA	NA	NA	NA	NA	NA	NA	NA	NA	NA	NA	3417978.198	NA	NA	NA	NA	NA	139223.363	NA	5127031.886	NA	NA	NA	NA	175184.097	NA	NA	NA
QC-exp3-ileon_5b	NA	20.54	1297.233	1062.133	NA	NA	343.891	5549.189	NA	NA	NA	NA	NA	NA	NA	22036.081	146.922	NA	NA	NA	NA	NA	NA	NA	NA	NA	NA	NA	NA	NA	NA	503.822	NA	16091.791	NA	NA	4701.324	NA	NA	NA	NA	NA	NA	NA	NA	NA	NA	NA	NA
QC-exp3-ileon_5c	NA	22.654	1252.354	995.802	NA	NA	424.455	5202.099	NA	NA	NA	NA	NA	NA	NA	21502.13	193.134	NA	NA	NA	NA	NA	NA	NA	NA	NA	NA	NA	NA	NA	NA	521.232	NA	15112.507	NA	NA	4751.227	NA	NA	NA	NA	NA	NA	NA	NA	NA	NA	NA	NA
QC-exp3-ileon_5d	NA	23.139	1095.864	953.054	NA	NA	545.216	4897.195	NA	NA	NA	NA	NA	NA	NA	20902.105	156.213	NA	NA	NA	NA	NA	NA	NA	NA	NA	NA	NA	NA	NA	NA	498.191	NA	13512.105	NA	NA	4351.831	NA	NA	NA	NA	NA	NA	NA	NA	NA	NA	NA	NA
QC_exp3-ileon_6a	NA	NA	NA	NA	29989.238	20467.139	NA	NA	11438.561	927.126	20774.438	14442.391	58250.942	4715494.701	NA	NA	NA	20958.905	6764415.745	10493.027	NA	851.588	786.572	2900728.942	989681.755	1083857.952	4846.45	14281.281	40690.7	1065508.486	99890.984	NA	NA	NA	NA	333715.348	NA	416539.322	NA	626206.181	NA	119972.66	8718.547	234161.89	81.163	NA	3299232.9	353455.558	414646.703
QC-exp3-ileon_5e	NA	24.729	1130.103	873.362	NA	NA	438.069	5100.047	NA	NA	NA	NA	NA	NA	NA	18841.132	132.185	NA	NA	NA	NA	NA	NA	NA	NA	NA	NA	NA	NA	NA	NA	487.547	NA	12555.533	NA	NA	4766.715	NA	NA	NA	NA	NA	NA	NA	NA	NA	NA	NA	NA
QC_exp3-ileon_6b	NA	NA	NA	NA	32889.615	19921.931	NA	NA	11790.396	1046.607	21141.02	27113.873	68181.799	5134505.511	NA	NA	NA	23772.572	9174327.313	10813.458	NA	834.823	1053.352	2935779.094	1022231.868	1108296.669	6049.564	32642.688	38986.602	1095754.923	120462.013	NA	NA	NA	NA	367902.123	NA	434425.385	NA	642468.412	NA	116681.541	13866.279	505040.682	178.485	NA	3367636.274	357444.95	420401.976
QC_exp3-ileon_5a	234509.518	NA	NA	NA	29903.09	20288.836	NA	NA	11374.64	1142.172	17770.564	12156.539	48608.095	4219696.567	4187.784	NA	NA	14752.345	4622605.502	9481.92	643651.629	643.395	716.486	2911180.195	934045.559	977384.503	6863.212	14694.107	39605.909	1022995.704	99095.323	NA	3755689.336	NA	40611.524	323809.543	NA	393337.35	175359.878	571909.073	4182857.146	159196.06	4873.068	214069.246	105.552	159459.398	2803265.142	339499.342	388300.882
QC-exp3-ileon_5f	NA	17.927	984.387	914.375	NA	NA	430.611	4885.06	NA	NA	NA	NA	NA	NA	NA	17792.092	152.17	NA	NA	NA	NA	NA	NA	NA	NA	NA	NA	NA	NA	NA	NA	400.783	NA	11261.012	NA	NA	4737.312	NA	NA	NA	NA	NA	NA	NA	NA	NA	NA	NA	NA
QC_exp3-ileon_6c	NA	NA	NA	NA	31526.16	20910.92	NA	NA	12129.411	700.692	22245.648	34851.022	74589.143	5749962.397	NA	NA	NA	29192.329	10567673.257	12264.989	NA	983.027	1116.185	2966548.94	1063079.427	1193503.38	5290.105	45774.861	44247.482	1139260.854	133519.596	NA	NA	NA	NA	375222.751	NA	450834.734	NA	660373.624	NA	119305.483	18611.232	571838.235	76.35	NA	3211420.045	372563.195	445171.567
QC_exp3-ileon_5b	232459.073	NA	NA	NA	31096.425	20281.448	NA	NA	11563.83	731.444	18970.614	13930.31	55755.942	4426527.347	4015.803	NA	NA	17270.541	5339710.901	9370.585	570258.466	678.875	802.377	2980466.986	959095.467	1039991.621	7300.593	13930.964	40086.463	1042719.395	134919.41	NA	3789066.564	NA	49902.375	314171.571	NA	401764.772	170771.799	589105.488	4192576.573	162206.233	6649.618	286680.145	131.296	161301.568	2581522.34	345589.706	408761.174
QC-exp3-ileon_5g	NA	17.215	920.314	843.503	NA	NA	248.365	4613.034	NA	NA	NA	NA	NA	NA	NA	17874.261	96.443	NA	NA	NA	NA	NA	NA	NA	NA	NA	NA	NA	NA	NA	NA	343.969	NA	9997.765	NA	NA	4232.323	NA	NA	NA	NA	NA	NA	NA	NA	NA	NA	NA	NA
QC_exp3-ileon_6d	NA	NA	NA	NA	34687.902	20728.817	NA	NA	12804.515	738.326	24395.305	25971.669	69294.452	5694769.238	NA	NA	NA	33315.273	13095764.203	17442.924	NA	1014.323	1344.12	2841351.604	1113992.921	1287143.858	3794.481	19964.053	45713	1205110.175	137091.659	NA	NA	NA	NA	365120.225	NA	468331.526	NA	702548.545	NA	131878.259	23256.958	512860.921	46.706	NA	3370722.107	388736.487	464317.687
QC-exp3-ileon_5h	NA	31.416	885.181	823.525	NA	NA	365.048	4378.451	NA	NA	NA	NA	NA	NA	NA	18364.517	69.489	NA	NA	NA	NA	NA	NA	NA	NA	NA	NA	NA	NA	NA	NA	263.116	NA	8968.868	NA	NA	3983.014	NA	NA	NA	NA	NA	NA	NA	NA	NA	NA	NA	NA
QC_exp123-ileon_post.baileon3	318378.496	NA	NA	NA	NA	NA	NA	NA	NA	NA	NA	NA	NA	NA	7753.692	NA	NA	NA	NA	NA	558478.881	NA	NA	NA	NA	NA	NA	NA	NA	NA	NA	NA	4261307.1	NA	NA	NA	NA	NA	162754.183	NA	6423649.256	NA	NA	NA	NA	218561.614	NA	NA	NA
QC-exp2-ileon_5a	NA	31.564	987.798	884.804	NA	NA	817.206	3711.211	NA	NA	NA	NA	NA	NA	NA	44916.518	118.945	NA	NA	NA	NA	NA	NA	NA	NA	NA	NA	NA	NA	NA	NA	218.992	NA	15379.382	NA	NA	2547.922	NA	NA	NA	NA	NA	NA	NA	NA	NA	NA	NA	NA
QC_exp3-ileon_5c	250334.146	NA	NA	NA	32003.063	20870.738	NA	NA	12461.568	1053.191	18050.06	22148.012	52508.561	4835800.844	4578.201	NA	NA	18753.581	6845517.559	11347.903	690253.195	710.403	847.394	2926305.708	989309.451	1046560.359	6515.874	32343.514	42587.143	1064988.93	111778.969	NA	4107938.895	NA	27861.597	365027.335	NA	416534.009	179765.118	596392.502	4573939.874	176975.768	8594.019	420562.871	84.999	175188.706	2614397.2	356594.493	411257.366
QC_exp123-ileon_6a	303259.14	NA	NA	NA	NA	NA	NA	NA	NA	NA	NA	NA	NA	NA	7726.571	NA	NA	NA	NA	NA	580792.551	NA	NA	NA	NA	NA	NA	NA	NA	NA	NA	NA	4378725.884	NA	NA	NA	NA	NA	163036.289	NA	6712028.592	NA	NA	NA	NA	206464.781	NA	NA	NA
QC_exp2-ileon_5e	207143.288	NA	NA	NA	NA	NA	NA	NA	NA	NA	NA	NA	NA	NA	5939.919	NA	NA	NA	NA	NA	440290.128	NA	NA	NA	NA	NA	NA	NA	NA	NA	NA	NA	3376609.877	NA	27796.72	NA	NA	NA	172791.116	NA	6711818.277	NA	NA	NA	NA	318651.773	NA	NA	NA
QC_exp2-ileon_5a	195178.221	NA	NA	NA	38969.04	26246.1	NA	NA	13305.479	2258.501	25725.532	333550.825	107395.239	6585547.512	5945.308	NA	NA	107686.49	97805791.614	143068.123	412982.761	989.285	1433.625	6068848.756	1239866.263	1068858.251	19564.65	710396.939	62851.051	1266792.739	274032.152	NA	3317962.113	NA	28171.838	321099.704	NA	486355.839	171296.253	681119.397	6585378.255	227584.223	176155.192	4743495.989	6012.645	314619.475	2469441.587	449475.803	467861.885
QC-exp2-ileon_5b	NA	12.927	936.169	908.279	NA	NA	412.374	3630.273	NA	NA	NA	NA	NA	NA	NA	44925.031	149.289	NA	NA	NA	NA	NA	NA	NA	NA	NA	NA	NA	NA	NA	NA	283.147	NA	15255.482	NA	NA	2650.676	NA	NA	NA	NA	NA	NA	NA	NA	NA	NA	NA	NA
QC_exp2-ileon_5f	200041.565	NA	NA	NA	NA	NA	NA	NA	NA	NA	NA	NA	NA	NA	8295.81	NA	NA	NA	NA	NA	435317.868	NA	NA	NA	NA	NA	NA	NA	NA	NA	NA	NA	3437049.88	NA	36008.909	NA	NA	NA	175727.427	NA	6690644.729	NA	NA	NA	NA	323973.316	NA	NA	NA
QC_exp2-ileon_5b	202638.227	NA	NA	NA	38199.992	23920.085	NA	NA	14415.489	1035.583	25593.603	27025.284	66714.504	4248085.516	7125.501	NA	NA	23917.813	21659480.573	17650.553	428483.02	812.435	756.761	6216784.864	1236550.121	1086354.378	4941.905	10539.018	52361.625	1191234.985	143138.467	NA	3374285.58	NA	31987.004	323054.416	NA	459628.319	173551.285	709852.032	6643132.817	158808.666	14965.32	128541.431	129.648	318032.709	2667245.247	454392.514	539837.404
QC-exp2-ileon_5c	NA	30.538	991.595	833.231	NA	NA	448.136	3766.329	NA	NA	NA	NA	NA	NA	NA	44357.343	106.994	NA	NA	NA	NA	NA	NA	NA	NA	NA	NA	NA	NA	NA	NA	342.27	NA	17200.169	NA	NA	2369.23	NA	NA	NA	NA	NA	NA	NA	NA	NA	NA	NA	NA
QC_exp3-ileon_5d	272930.88	NA	NA	NA	36954.5	20305.639	NA	NA	13910.779	580.521	23635.563	36895.253	77214.03	5879186.076	6191.817	NA	NA	34504.333	13261246.597	20135.34	719115.554	1078.427	1325.387	2946400.517	1083597.536	1297201.978	3514.116	44153.115	47304.98	1181430.245	147923.504	NA	4247250.867	NA	35457.542	327088.275	NA	457347.854	186216.742	692393.149	4697470.822	185203.359	28206.373	615846.824	44.823	176867.556	2594008.153	390054.845	473933.174
QC_exp1-ileon_5a	4505834.855	NA	NA	NA	21888.692	15622.334	NA	NA	9241.949	662.531	12803.162	9438.211	54147.428	4646741.9	51475.347	NA	NA	10476.717	4952842.331	5633.967	5340516.682	566.995	923.474	1834766.662	730545.33	804669.074	3131.147	22535.395	31863.591	1098700.258	83928.086	NA	49484750.383	NA	26724.784	361210.905	NA	384468.922	1281473.983	450019.195	67593965.492	118404.897	2993.463	599793.033	28.991	1246739.097	4387326.27	282820.195	302353.451
QC_exp2-ileon_5c	208651.322	NA	NA	NA	36846.341	24598.202	NA	NA	14657.878	2944.892	25783.894	16074.79	50721.428	3874055.784	7626.979	NA	NA	9442.272	1866676.837	7901.281	432453.417	1051.751	965.283	6395073.066	1266393.806	1137344.571	5177.611	13016.056	55332.89	1248456.265	111981.86	NA	3446681.714	NA	29494.767	350611.613	NA	473978.009	177623.918	731376.621	6753430.895	165864.607	952.751	49041.847	84.527	318064.324	2726749.367	476347.843	567887.543
QC-exp2-ileon_5d	NA	37.122	1079.167	915.724	NA	NA	448.678	3764.777	NA	NA	NA	NA	NA	NA	NA	44254.795	113.856	NA	NA	NA	NA	NA	NA	NA	NA	NA	NA	NA	NA	NA	NA	349.801	NA	18473.029	NA	NA	2548.549	NA	NA	NA	NA	NA	NA	NA	NA	NA	NA	NA	NA
QC_exp2-ileon_5g	211072.84	NA	NA	NA	NA	NA	NA	NA	NA	NA	NA	NA	NA	NA	8287.807	NA	NA	NA	NA	NA	444770.964	NA	NA	NA	NA	NA	NA	NA	NA	NA	NA	NA	3440285.836	NA	41611.256	NA	NA	NA	174119.249	NA	6698763.047	NA	NA	NA	NA	330244.003	NA	NA	NA
QC_exp1-ileon_5b	2920196.908	NA	NA	NA	21334.194	16790.081	NA	NA	9529.611	537.468	11912.867	12156.064	47359.743	4056066.124	44232.868	NA	NA	16852.541	942878.951	8658.917	3895217.59	501.733	950.305	1737416.322	747776.454	857185.232	2154.286	9757.406	25784.07	1071636.97	79584.992	NA	33213864.674	NA	29820.208	344857.109	NA	359503.344	919032.503	465172.149	47016167.489	113418.983	5492.058	233224.7	88.575	930251.933	4077902.636	281896.429	325539.792
QC-exp2-ileon_5e	NA	16.57	1024.664	929.708	NA	NA	501.085	3522.365	NA	NA	NA	NA	NA	NA	NA	45586.894	118.985	NA	NA	NA	NA	NA	NA	NA	NA	NA	NA	NA	NA	NA	NA	270.791	NA	8601.118	NA	NA	2277.621	NA	NA	NA	NA	NA	NA	NA	NA	NA	NA	NA	NA
QC_exp1-ileon_5c	683843.498	NA	NA	NA	23187.985	17385.13	NA	NA	10303.769	398.995	15257.879	35863.311	95193.001	5583175.281	16325.971	NA	NA	52871.576	30693627.466	29136.703	950463.595	926.771	636.019	1871628.834	771751.176	947089.853	3259.967	18348.839	29991.937	1119311.675	100016.29	NA	7816479.994	NA	25614.255	391850.417	NA	389498.483	317489.866	499096.202	12439431.674	137373.17	30283.112	1256670.039	533.441	369743.911	4063817.234	292063.558	352311.649
QC_exp2-ileon_5d	210740.716	NA	NA	NA	38682.048	21929.638	NA	NA	15462.997	3046.057	25953.222	36892.484	119663.487	6095872.987	7667.466	NA	NA	34115.799	175333703.577	24864.354	430322.625	1045.687	1211.221	7153754.527	1282426.072	1074321.375	5944.344	33956.611	67778.485	1452325.572	162320.259	NA	3423099.092	NA	24839.187	366370.433	NA	529905.834	176327.752	709321.658	6766726.134	173506.782	32954.967	1252955.512	83.743	322294.003	3541770.715	486967.837	519651.807
QC_exp1-ileon_6a	NA	NA	NA	NA	22721.857	17318.93	NA	NA	8809.637	962.726	15506.388	43408.562	60874.684	5115463.313	NA	NA	NA	72980.434	2141743.805	15336.833	NA	622.798	893.703	1834544.263	795373.164	1037346.661	3903.323	25239.46	33137.132	1060344.801	92754.86	NA	NA	NA	NA	377055.299	NA	396890.79	NA	525524.239	NA	97952.833	21960.961	524411.528	102.914	NA	4813513.337	294899.806	352420.015
QC_exp3-ileon_5e	282514.695	NA	NA	NA	NA	NA	NA	NA	NA	NA	NA	NA	NA	NA	4889.093	NA	NA	NA	NA	NA	713837.171	NA	NA	NA	NA	NA	NA	NA	NA	NA	NA	NA	4382505.301	NA	21998.103	NA	NA	NA	186958.331	NA	4899373.744	NA	NA	NA	NA	182850.778	NA	NA	NA
QC-exp2-ileon_5f	NA	22.767	1022.145	966.902	NA	NA	482.128	3825.479	NA	NA	NA	NA	NA	NA	NA	44571.579	105.384	NA	NA	NA	NA	NA	NA	NA	NA	NA	NA	NA	NA	NA	NA	293.08	NA	16327.852	NA	NA	2402.354	NA	NA	NA	NA	NA	NA	NA	NA	NA	NA	NA	NA
QC_exp1-ileon_5d	558209.683	NA	NA	NA	21949.962	15792.763	NA	NA	10933.234	523.042	13359.304	12129.887	61744.662	4582023.945	15106.058	NA	NA	9484.493	4289706.409	1085.104	823008.962	972.995	1145.137	1779740.516	760579.85	852572.28	2676.774	12793.687	29354.956	1103027.263	79651.391	NA	6534755.217	NA	33909.608	363820.473	NA	372361.925	272074.232	508288	10445170.893	130698.347	1962.347	421159.746	38.667	317823.336	4002242.749	287691.425	329219.463
QC_exp3-ileon_5f	293545.334	NA	NA	NA	NA	NA	NA	NA	NA	NA	NA	NA	NA	NA	5279.903	NA	NA	NA	NA	NA	723781.3	NA	NA	NA	NA	NA	NA	NA	NA	NA	NA	NA	4474180.331	NA	28325.99	NA	NA	NA	191953.964	NA	4986839.165	NA	NA	NA	NA	187449.736	NA	NA	NA
QC_exp1-ileon_6b	NA	NA	NA	NA	24263.489	15873.13	NA	NA	12850.42	472.907	13288.954	809.519	74400.278	5729850.237	NA	NA	NA	2499.085	8166778.902	3751.425	NA	520.483	1122.169	1776161.543	800060.776	950323.531	3285.353	14647.333	31753.185	1196152.015	69283.417	NA	NA	NA	NA	373546.061	NA	402394.833	NA	514925.649	NA	141198.845	3417.466	578380.713	135.722	NA	4118165.759	295520.268	336558.599
QC-exp2-ileon_5g	NA	25.06	960.964	848.895	NA	NA	645.366	3711.096	NA	NA	NA	NA	NA	NA	NA	46045.103	145.598	NA	NA	NA	NA	NA	NA	NA	NA	NA	NA	NA	NA	NA	NA	248.077	NA	16698.138	NA	NA	2712.613	NA	NA	NA	NA	NA	NA	NA	NA	NA	NA	NA	NA
QC_batch-exp123-exp1-ileon_SF_8a	NA	18.742	1415.177	1234.332	NA	NA	896.418	5035.446	NA	NA	NA	NA	NA	NA	NA	33711.837	143.912	NA	NA	NA	NA	NA	NA	NA	NA	NA	NA	NA	NA	NA	NA	388.85	NA	28817.738	NA	NA	2818.737	NA	NA	NA	NA	NA	NA	NA	NA	NA	NA	NA	NA
QC_batch-exp1-ileon_SF_7a	NA	21.637	855.111	773.623	NA	NA	695.35	3569.305	NA	NA	NA	NA	NA	NA	NA	29474.232	102.612	NA	NA	NA	NA	NA	NA	NA	NA	NA	NA	NA	NA	NA	NA	359.886	NA	11074.298	NA	NA	2421.444	NA	NA	NA	NA	NA	NA	NA	NA	NA	NA	NA	NA
QC_exp123-ileon_6b	322651.437	NA	NA	NA	NA	NA	NA	NA	NA	NA	NA	NA	NA	NA	7185.977	NA	NA	NA	NA	NA	609027.224	NA	NA	NA	NA	NA	NA	NA	NA	NA	NA	NA	4439990.59	NA	NA	NA	NA	NA	169554.077	NA	6747999.009	NA	NA	NA	NA	220612.346	NA	NA	NA
QC_exp1-ileon_6c	NA	NA	NA	NA	25430.392	17538.646	NA	NA	13005.663	448.523	14951.571	32496.112	90620.86	6925588.682	NA	NA	NA	30270.417	123575261.597	19267.478	NA	947.584	1064.156	1811074.624	827169.232	975544.934	2658.748	42824.954	35241.174	1196392.966	112336.881	NA	NA	NA	NA	404941.057	NA	429393.957	NA	541150.029	NA	156027.912	36458.691	2194047.055	78.705	NA	4094279.79	304537.229	364507.594
QC_exp3-ileon_5g	299617.728	NA	NA	NA	NA	NA	NA	NA	NA	NA	NA	NA	NA	NA	7025.278	NA	NA	NA	NA	NA	717955.048	NA	NA	NA	NA	NA	NA	NA	NA	NA	NA	NA	4451476.855	NA	23355.415	NA	NA	NA	192463.375	NA	5061334.748	NA	NA	NA	NA	184624.059	NA	NA	NA
QC_exp123-ileon_pre.baileon1	280.727	NA	NA	NA	NA	NA	NA	NA	NA	NA	NA	NA	NA	NA	174.301	NA	NA	NA	NA	NA	643.301	NA	NA	NA	NA	NA	NA	NA	NA	NA	NA	NA	3696.562	NA	NA	NA	NA	NA	1178.001	NA	10714.266	NA	NA	NA	NA	2752.6	NA	NA	NA
QC_exp1-ileon_5e	465139.649	NA	NA	NA	27753.425	18734.463	NA	NA	14272.476	465.673	17422.162	18260.425	74327.384	6982522.773	14439.956	NA	NA	24203.638	27874782.618	7817.221	649465.811	881.316	945.352	1804712.202	821887.648	991308.157	3684.127	39075.68	35469.627	1237673.128	39582.945	NA	5126383.88	NA	35315.645	398915.149	NA	429955.739	242671.039	530381.722	8514571.322	170159.579	6194.617	1135397.47	157.017	289050.406	4004104.905	311566.219	353509.02
QC_batch-exp1-ileon_SF_7b	NA	18.858	815.123	760.364	NA	NA	380.899	3500.184	NA	NA	NA	NA	NA	NA	NA	30225.05	147.12	NA	NA	NA	NA	NA	NA	NA	NA	NA	NA	NA	NA	NA	NA	329.83	NA	10963.851	NA	NA	2736.92	NA	NA	NA	NA	NA	NA	NA	NA	NA	NA	NA	NA
QC_exp1-ileon_6d	NA	NA	NA	NA	24439.992	15986.226	NA	NA	8812.023	645.119	15348.358	13589.332	68151.809	5359917.222	NA	NA	NA	18860.106	4897463.57	6487.788	NA	759.12	876.657	1740314.256	807421.312	967943.659	3255.164	29521.391	33169.64	1117795.511	117877.069	NA	NA	NA	NA	395198.951	NA	434740.997	NA	502760.992	NA	102385.232	2554.053	834839.455	100.281	NA	4450458.135	299438.085	335811.113
QC_exp1-ileon_5f	378894.095	NA	NA	NA	NA	NA	NA	NA	NA	NA	NA	NA	NA	NA	12040.494	NA	NA	NA	NA	NA	529805.936	NA	NA	NA	NA	NA	NA	NA	NA	NA	NA	NA	4444476.679	NA	30141.978	NA	NA	NA	206892.464	NA	7512673.013	NA	NA	NA	NA	248398.879	NA	NA	NA
QC_batch-exp1-ileon_SF_7c	NA	23.416	996.202	836.377	NA	NA	344.771	3926.407	NA	NA	NA	NA	NA	NA	NA	32241.765	137.982	NA	NA	NA	NA	NA	NA	NA	NA	NA	NA	NA	NA	NA	NA	317.654	NA	11815.8	NA	NA	3250.571	NA	NA	NA	NA	NA	NA	NA	NA	NA	NA	NA	NA
QC_exp1-ileon_5g	339556.953	NA	NA	NA	NA	NA	NA	NA	NA	NA	NA	NA	NA	NA	10538.972	NA	NA	NA	NA	NA	506014.291	NA	NA	NA	NA	NA	NA	NA	NA	NA	NA	NA	3672321.629	NA	31529.418	NA	NA	NA	188364.424	NA	6158085.742	NA	NA	NA	NA	233971.034	NA	NA	NA
QC_exp1-ileon_5h	286111.897	NA	NA	NA	NA	NA	NA	NA	NA	NA	NA	NA	NA	NA	10350.502	NA	NA	NA	NA	NA	399666.866	NA	NA	NA	NA	NA	NA	NA	NA	NA	NA	NA	3064726.171	NA	27137.389	NA	NA	NA	167916.606	NA	5317138	NA	NA	NA	NA	215061.342	NA	NA	NA
QC_batch-exp1-ileon_SF_7d	NA	22.323	948.322	834.998	NA	NA	389.097	3824.081	NA	NA	NA	NA	NA	NA	NA	32467.785	102.39	NA	NA	NA	NA	NA	NA	NA	NA	NA	NA	NA	NA	NA	NA	369.063	NA	13007.362	NA	NA	3194.628	NA	NA	NA	NA	NA	NA	NA	NA	NA	NA	NA	NA
QC_exp2-ileon_6a	NA	NA	NA	NA	32986.549	22251.855	NA	NA	11591.636	1880.588	23937.364	49560.354	83633.978	4071484.976	NA	NA	NA	116182.233	3711775.952	26937.057	NA	872.35	904.756	6038012.516	1185399.582	1023572.631	7322.382	19795.573	54577.575	1017326.308	144268.348	NA	NA	NA	NA	296881.066	NA	442443.999	NA	688179.999	NA	117845.547	81725.142	80917.724	27.552	NA	2291946.621	441523.622	492701.679
QC_batch-exp1-ileon_SF_7e	NA	29.802	991.721	942.607	NA	NA	495.547	3642.49	NA	NA	NA	NA	NA	NA	NA	33253.851	101.314	NA	NA	NA	NA	NA	NA	NA	NA	NA	NA	NA	NA	NA	NA	310.525	NA	12905.241	NA	NA	3032.272	NA	NA	NA	NA	NA	NA	NA	NA	NA	NA	NA	NA
QC_exp2-ileon_6b	NA	NA	NA	NA	35558.866	21776.143	NA	NA	12002.593	2364.9	22291.131	12069.809	43894.419	4017594.488	NA	NA	NA	11703.706	2017968.043	7155.421	NA	646.269	564.375	6105422.179	1167763.585	971437.025	5150.312	12657.4	54712.746	1020598.701	117626.96	NA	NA	NA	NA	290057.251	NA	445570.782	NA	683922.033	NA	108676.751	4655.115	112256.4	109.779	NA	2413355.814	439515.244	485609.85
QC_batch-exp1-ileon_SF_7f	NA	16.601	898.185	842.313	NA	NA	407.102	3994.327	NA	NA	NA	NA	NA	NA	NA	32067.373	108.922	NA	NA	NA	NA	NA	NA	NA	NA	NA	NA	NA	NA	NA	NA	409.502	NA	11520.409	NA	NA	3132.06	NA	NA	NA	NA	NA	NA	NA	NA	NA	NA	NA	NA
QC_exp123-ileon_post.baileon1	200606.65	NA	NA	NA	NA	NA	NA	NA	NA	NA	NA	NA	NA	NA	6659.169	NA	NA	NA	NA	NA	388614.528	NA	NA	NA	NA	NA	NA	NA	NA	NA	NA	NA	2673165.567	NA	NA	NA	NA	NA	135726.707	NA	4277748.35	NA	NA	NA	NA	188215.143	NA	NA	NA
QC_exp2-ileon_6c	NA	NA	NA	NA	34053.175	20466.682	NA	NA	13056.335	2345.75	21048.323	12332.151	31253.136	4209287.866	NA	NA	NA	5718.253	3897275.156	1297.674	NA	885.699	1151.908	6147634.415	1139564.284	942234.91	5122.852	12562.646	53930.587	1077963.057	122799.245	NA	NA	NA	NA	335280.25	NA	440460.882	NA	641755.258	NA	102967.364	1570.692	83323.276	170.971	NA	2578088.098	439924.059	471940.114
QC_batch-exp1-ileon_SF_7g	NA	15.532	999.582	667.077	NA	NA	355.257	3721.108	NA	NA	NA	NA	NA	NA	NA	32372.603	96.498	NA	NA	NA	NA	NA	NA	NA	NA	NA	NA	NA	NA	NA	NA	305.223	NA	11680.958	NA	NA	3042.245	NA	NA	NA	NA	NA	NA	NA	NA	NA	NA	NA	NA
QC_exp1-ileon_5i	212848.664	NA	NA	NA	NA	NA	NA	NA	NA	NA	NA	NA	NA	NA	8639.809	NA	NA	NA	NA	NA	338495.291	NA	NA	NA	NA	NA	NA	NA	NA	NA	NA	NA	2551794.256	NA	NA	NA	NA	NA	130694.911	NA	4444903.914	NA	NA	NA	NA	170330.743	NA	NA	NA
QC_batch-exp1-ileon_SF_7h	NA	28.396	840.564	836.561	NA	NA	443.015	3723.64	NA	NA	NA	NA	NA	NA	NA	33651.296	171.01	NA	NA	NA	NA	NA	NA	NA	NA	NA	NA	NA	NA	NA	NA	215.469	NA	11409.926	NA	NA	3110.687	NA	NA	NA	NA	NA	NA	NA	NA	NA	NA	NA	NA
QC_batch-exp123-exp1-ileon_SF_8b	NA	45.304	1391.817	1257.217	NA	NA	624.23	5178.783	NA	NA	NA	NA	NA	NA	NA	40337.633	171.796	NA	NA	NA	NA	NA	NA	NA	NA	NA	NA	NA	NA	NA	NA	347.437	NA	28712.923	NA	NA	2895.722	NA	NA	NA	NA	NA	NA	NA	NA	NA	NA	NA	NA
QC_exp2-ileon_6d	NA	NA	NA	NA	35985.518	20593.56	NA	NA	13899.351	3476.374	22876.259	32941.84	117997.853	5411924.6	NA	NA	NA	26906.449	115995974.837	16196.883	NA	737.283	771.355	6494912.141	1175103.946	967430.821	5421.423	29277.652	65956.28	1186211.546	191215.436	NA	NA	NA	NA	312023.29	NA	471582.104	NA	641755.246	NA	117355.119	22994.067	893508.268	133.155	NA	2759146.242	453759.7	474439.3
QC_exp1-ileon_5jb	165220.624	NA	NA	NA	NA	NA	NA	NA	NA	NA	NA	NA	NA	NA	5919.009	NA	NA	NA	NA	NA	251536.704	NA	NA	NA	NA	NA	NA	NA	NA	NA	NA	NA	1917906.031	NA	NA	NA	NA	NA	106603.003	NA	3461225.022	NA	NA	NA	NA	141848.145	NA	NA	NA
Nacl-j3-exp3-ileon_267	364180.052	130.461	1249.79	3627.343	42366.358	18154.643	504.837	19881.135	6992.156	11702.419	31025.651	30411.213	142596.391	16553513.483	13647.425	31449.576	561.143	78186.486	7155454.165	7445.692	1033095.794	1492.044	482.829	958209.02	347286.617	5252922.998	48925.775	259607.984	54541.36	1023681.158	191527.822	173.3	5684945.725	12915.502	NA	360830.127	3398.253	341265.666	520192.846	1159713.556	10126353.111	153994.313	68961.957	404597.337	176495.942	598953.636	5391618.994	168988.773	80937.409
FECES-j3-exp3-ileon_280	733.001	15.173	835.921	775.452	17640.794	8986.941	300.577	8718.268	21627.461	466.691	11310.57	7623.775	35317.911	2381722.656	233.359	22692.549	85.317	11400.29	2374532.678	8868.639	271328.009	647.017	478.608	705893.908	1183876.963	408239.533	364.591	2232.543	18328.166	1063908.983	36959.339	298.495	2975227.521	1984.1	3645.282	327571.407	2026.452	398182.859	42500.212	415031.657	88783.275	62228.627	2289.651	140363.503	30.507	301.092	4872912.098	455341.137	752118.142
ATB-j7-exp3-ileon_297	31.207	16.396	6.043	321.783	11168.497	5096.841	220.979	3220.083	19868.33	1180.596	4946.573	2085.319	16800.521	857707.159	18.192	3809.594	51.559	470.266	1049467.216	3592.244	216.657	284.772	219.501	517466.134	352973.512	130966.107	27.43	1685.642	18489.32	1491436.584	15510.582	136.401	909.716	1460.998	13504.117	381449.245	3048.228	487582.921	367.337	263075.732	1393.04	59310.651	398.834	85698.151	13.655	492.821	9502184.657	45931.75	161174.963
AKKERMANSIA-j14-exp3-ileon_327	635213.381	8.758	362.162	523.924	19064.428	16374.108	238.146	1922.336	13010.222	759.951	9555.746	25074.582	78971.175	4870323.56	1229.465	11323.303	170.684	10723.273	3825465.401	23428.028	285450.925	137.313	806.061	1317975.418	2405197.743	228145.196	3645.583	48411.952	36225.664	858465.452	120631.697	371.158	2164085.262	1030.652	205578.607	283810.52	1412.187	326597.237	173033.806	97106.271	6635650.785	137165.726	3084.253	256297.323	40.377	223875.556	1808092.78	767071.084	345674.46
Nacl-j7-exp3-ileon_291	366971.427	52.265	891.571	741.923	10175.979	22690.173	410.306	3063.614	7263.781	910.632	9727.266	12465.795	23582.59	3580098.284	5508.568	15770.624	69.301	6415.033	4766614.078	5450.813	203710.078	542.441	470.626	17451565.716	589662.795	242869.943	4830.491	20475.089	24474.539	1000915.471	48211.698	298.719	905824.991	8160.902	45354.312	343551.189	1478.408	348696.194	98743.755	210667.256	5918881.736	44617.089	3385.988	104198.902	30.85	281197.409	4487239.257	276371.896	175035.07
ATB-j3-exp3-ileon_273	131.671	21.116	1.959	273.728	14713.337	9855.054	252.973	1646.556	18433.825	1853.554	8831.178	779.385	54507.848	1355460.733	19.188	4320.588	41.1	3497.484	33763.288	25734.249	4466.218	295.744	587.667	3524475.955	1754349.577	298012.53	501.892	353.596	17753.359	1116453.167	18941.488	164.041	29859.411	386.333	11093.059	340313.014	2108.706	370560.847	838.415	236326.21	9817.58	95850.069	625.649	27275.363	3.152	414.173	5029736.658	179060.099	600282.613
FECES-j7-exp3-ileon_304	46409.625	18.829	1487.639	815.368	28096.586	36628.932	348.111	3951.681	16890.676	1394.512	19992.497	47086.47	83543.336	8873396.359	1222.729	14003.488	216.649	15209.287	5510684.396	13633.119	2481443.145	635.697	1091.114	2233522.388	960935.106	368859.481	15035.902	88671.273	54989.778	900273.91	180203.163	162.726	10918566.146	1429.156	27444.664	326114.367	1755.395	338292.121	204791.134	611307.836	1007858.461	224813.831	9336.592	688150.678	272.391	NA	2293813.514	540088.781	685175.867
ATB-j14-exp3-ileon_314	4298.689	8.779	24.807	184.195	6772.835	4968.154	144.887	906.381	19262.401	690.565	4828.347	20.305	9722.61	772584.977	157.134	3624.266	42.623	96.519	15945.58	755.724	5519.19	534.578	482.944	1522428.598	452172.007	142106.742	224.592	38.202	38915.889	752371.441	10738.075	254.925	56965.864	1199.766	6972.558	276750.48	1513.509	302955.579	1995.525	284784.237	140596.3	51898.753	39.699	28339.252	18.743	3646.81	8717254.354	37576.933	315195.186
FECES-j14-exp3-ileon_323	515566.506	8.489	1230.67	2652.453	79558.395	61936.06	403.886	8935.379	10254.892	2113.25	29500.9	39420.77	244191.812	6728499.954	16469.612	43995.788	305.141	58027.998	7976168.892	83941.917	1693584.592	620.905	4657.595	1274683.138	1054179.593	743719.098	16438.483	106029.371	40375.333	682093.927	449045.43	427.502	5380317.115	32485.022	37043.489	369289.7	3745.438	343254.029	786214.743	613472.984	10805266.928	219693.102	13468.337	522196.673	181.397	286199.387	3689890.383	1221678.91	302540.872
Nacl-j3-exp3-ileon_269	709306.476	42.446	2292.999	3446.919	35669.832	14188.454	474.831	8048.739	6071.36	1604.35	23528.469	85582.989	51158.54	6048583.966	19462.552	35411.316	595.631	17375.139	7908693.943	5009.578	759959.768	957.584	673.06	2168906.478	626229.26	1334742.481	11277.275	201805.077	19342.832	868260.896	180785.398	423.075	4793216.565	63281.409	74618.058	310565.549	2551.388	333031.5	310825.068	655423.464	9804794.841	69014.772	12102.847	536679.942	145.854	470443.585	5357041.728	413226.672	145714.382
FECES-j7-exp3-ileon_301	18395.75	29.987	1563.854	1480.879	40092.253	27124.027	321.072	4069.926	16133.083	671.971	19621.677	23703.645	138514.288	5449540.775	951.964	28231.503	97.216	13458.935	2289083.317	13919.401	753721.553	635.282	1178.999	1032337.736	767578.795	792913.858	5018.183	11224.859	38483.929	726607.93	130468.99	472.296	5424522.167	1580.113	38552.619	303651.037	2254.987	317565.513	66876.202	519945.874	648358.563	184183.527	3287.583	543726.033	99.374	152.051	6297573.578	799709.294	697107.596
ATB-j3-exp3-ileon_272	1212.53	4.853	14.534	173.832	9385.79	6615.84	195.862	914.837	49439.062	1171.567	6681.4	984.605	33639.682	1374706.425	46.23	3879.547	67.772	3159.578	5822.073	2912.031	1085.369	230.237	654.065	3080399.33	1196370.097	122960.676	304.274	1685.168	26489.64	1141707.161	3366.779	247.363	9616.567	479.436	3406.066	318442.339	1716.239	367037.617	428.424	271761.57	23711.535	74322.012	297.822	57605.196	19.041	937.069	14259659.463	98138.558	483149.268
AKKERMANSIA-j14-exp3-ileon_329	262742.45	44.8	716.557	1265.42	34284.66	19915.339	297.657	6815.939	10228.632	1352.908	42053.852	131504.894	74891.616	5978428.863	8721.382	18893.623	371.831	17797.408	11675671.003	10653.28	400672.042	738.318	679.742	1167619.702	1259992.344	1508615.902	17585.14	248473.007	26856.817	680070.997	204452.356	408.807	2657766.054	5796.124	93063.57	312094.404	3632.874	353383.063	248376.84	770747.092	6340594.699	233562.517	9511.589	860350.102	299.406	71114.222	2671196.735	446958.595	271561.813
Nacl-j7-exp3-ileon_290	87534.62	29.809	780.849	496.923	14430.998	21835.447	427.034	1394.975	18689.706	1096.176	6041.288	185351.846	168093.105	9189321.571	782.853	24160.096	18.672	15683.121	7175896.429	39892.045	23009.872	391.501	2206.978	3032722.962	2325221.178	232265.548	77191.848	1251523.423	51011.1	1373424.946	201970.49	353.057	144857.301	7584.083	91969.31	422216.041	1320.235	459037.694	22958.42	307868.364	576129.506	285273.821	20152.707	734407.952	2510.113	69887.095	3616086.568	701727	368258.837
FECES-j3-exp3-ileon_278	719.15	21.199	598.322	889.294	23576.974	9566.477	308.635	4606.747	13795.974	1967.472	14408.018	10976.156	29917.356	4099701.359	162.788	20850.2	99.854	19009.263	5410948.392	3334.718	703395.694	908.582	682.863	714611.627	885625.964	1675193.503	380.629	5290.787	22631.262	1106421.74	46075.995	376.973	5270434.471	1291.185	18506.21	336579.528	1859.695	391433.101	97082.099	770872.08	200940.412	61733.773	12646.209	177542.233	29.438	2162.489	4347226.581	393857.717	660465.878
AKKERMANSIA-j3-exp3-ileon_284	125.769	15.212	558.648	278.339	96206.247	30735.995	405.21	3296.335	25412.433	317.815	11510.77	2503.19	45443.729	2715625.898	72.593	10823.559	90.081	332.078	238408.608	3904.776	104642.633	623.153	601.317	721795.917	1027280.47	416267.429	1001.489	11762.833	79571.479	1301955.469	19949.293	295.903	1930238.984	1193.905	66828.311	422272.592	2767.436	427976.656	52246.692	511558.913	56276.418	76956.071	176.303	75813.283	18.843	565.695	12207979.063	204291.41	638813.01
ATB-j7-exp3-ileon_296	445.562	12.722	10.5	208.2	10493.124	4259.57	248.18	830.186	16779.384	284.193	5997.094	831.253	13138.681	1140864.404	9.878	3755.598	12.239	1557.42	25121.278	3572.975	3212.979	235.957	281.076	1815110.963	729519.842	109026.954	213.57	660.085	20963.204	1394478.607	14381.239	238.622	29959.217	202.35	1630.898	437636.931	1503.059	471047.044	1030.551	269972.59	24130.626	49070.279	175.19	37520.424	58.741	948.391	3509513.233	83442.223	302478.877
Nacl-j3-exp3-ileon_268	1537034.542	60.996	992.979	3159.358	23217.012	17429.844	443.186	9593.859	7513.587	2605.306	11554.851	47487.896	46823.766	12657644.406	9530.761	24327.401	325.613	40427.671	5457260.764	3129.146	913899.285	524.335	1331.526	753803.224	81981.817	3155208.858	42420.281	1574114.158	22410.022	794760.508	110140.165	476.328	7032331.416	10807.689	1925.602	330904.16	3883.896	298058.847	572715.806	388107.97	14668995.426	58264.941	24499.847	513990.962	19298.594	1157271.74	10723191.44	100906.474	71908.75
AKKERMANSIA-j14-exp3-ileon_325	34198.636	5.044	4896.162	712.167	28458.158	12769.963	485.901	2332.305	19976.537	1228.981	6162.581	20114.796	33350.502	2420147.239	686.008	15140.165	80.267	11879.851	3590366.455	6405.331	114236.138	343.548	717.204	6840416.561	639939.571	318242.326	3024.595	34647.692	67920.861	779933.279	68118.131	359.371	1274069.835	12885.586	164956.338	490446.798	6556.649	408843.693	62425.883	266562.17	1948566.87	80660.64	3476.858	285276.653	55.616	48873.263	4513237.588	261043.456	192350.512
ATB-j3-exp3-ileon_275	124.004	7.698	39.134	309.248	18467.035	10137.406	244.126	2550.183	18016.951	360.835	5196.008	526.974	63072.216	1061227.205	9.049	3819.92	67.409	601.137	80040.087	25816.678	3847.117	292.232	550.399	1325372.822	625280.577	186285.66	195.05	276.326	32199.761	1115721.004	18237.674	356.474	37341.553	1301.289	6020.935	348867.872	2825.412	406613.87	942.637	309436.287	7792.85	90044.019	425.073	105106.64	4.057	451.856	7573704.12	81146.639	304217.635
AKKERMANSIA-j3-exp3-ileon_286	758.171	7.222	152.071	85.892	30579.441	10417.399	146.697	618.315	17341.332	1306.461	11108.765	104.524	7562.489	2026948.674	98.104	4553.03	15.591	59.101	63855.87	40.195	317460.481	367.432	188.812	413696.726	1062458.293	144399.19	231.733	271.927	16594.934	1176421.267	12720.359	305.228	2444512.536	28.202	688.152	374281.17	1768.249	384477.88	34703.401	433800.684	116073.301	61316.209	4.434	6911.162	114.065	523.285	4486350.479	239821.893	1025268.782
FECES-j7-exp3-ileon_305	55645.911	47.032	315.18	781.34	21702.22	30050.009	374.991	8452.276	11941.482	2778.028	27693.886	43946.776	84016.42	12329100.765	869.405	10659.051	98.199	20460.909	5127261.787	11275.378	2447666.78	484.588	1288.676	1670942.625	737387.416	441197.232	8009.343	202354.155	72059.276	682836.04	166202.548	702.842	13697496.479	311.198	14414.718	300572.757	2245.604	305854.8	338417.78	452907.315	2149805.617	177012.576	11208.656	1031734.761	129.072	6176.19	1582122.725	617202.878	515274.459
AKKERMANSIA-j7-exp3-ileon_310	9594.659	16.578	363.559	500.22	28727.682	78102.378	696.954	2005.651	13475.136	5276.757	34156.454	34671.947	144435.635	7284332.731	390.549	6611.608	304.574	15049.276	13951751.299	33044.701	678476.478	914.728	1639.377	8836382.292	1317370.453	909266.325	23606.434	68662.191	59138.825	667953.327	158410.41	481.738	5832439.777	458.423	45859.516	323380.493	2176.25	300701.782	165774.997	649944.422	798180.663	231431.768	17754.016	789959.196	98.094	1652.745	1502625.196	366523.365	517981.861
ATB-j14-exp3-ileon_317	72.727	18.926	108.436	411.269	34012.539	11941.909	283.113	1485.541	21780.273	1031.254	28885.42	16515.109	32075.611	3561743.083	2.73	3638.14	86.778	7725.673	1412415.485	3925.178	1520.138	1349.508	1247.202	1650733.538	852770.204	2841542.638	566.446	25855.609	45249.471	862130.261	63954.917	325.874	11730.418	911.009	2285.531	357570.688	1627.279	343315.445	509.237	1120052.193	2658.243	457750.637	2686.763	454342.624	16.165	303.955	7923441.668	58107.938	350457.134
Nacl-j7-exp3-ileon_292	365972.041	70.592	1141.987	1087.537	23882.291	20375.122	604.571	4794.268	11104.753	3154.071	14191.503	220535.009	135367.574	9797748.096	4407.432	34914.194	208.796	21490.027	11594706.646	34844.305	146412.102	887.881	1974.39	1288069.409	832728.313	1352120.146	63367.839	1421550.884	57987.497	987354.15	199840.697	433.169	920167.633	19437.562	29617.48	367455.246	2072.596	416513.479	71146.525	735620.181	3502612.748	162662.482	45359.216	843012.579	25728.698	426674.92	5894207.043	566605.396	219891.892
AKKERMANSIA-j7-exp3-ileon_307	10902.34	10.587	77.776	236.579	8651.031	10117.832	460.297	1010.843	24275.205	632.618	11895.13	2893.136	13421.521	2031476.7	679.067	4639.636	47.597	3908.583	38996.908	1940.95	936617.27	325.549	389.096	4431038.874	215518.978	137434.61	1867.93	1225.519	19656.431	687463.165	23321.326	323.349	6995860.119	185.931	122.849	261718.905	1936.635	302564.838	198787.243	332387.948	767923.53	58405.665	701.427	11166.745	26.442	1664.939	5138292.835	130553.046	225014.757
FECES-j14-exp3-ileon_322	918797.699	45.811	2464.574	1999.441	39186.163	26627.544	659.737	1987.74	21671.471	2516.186	12456.686	157128.206	176058.003	10304054.414	18549.018	26485.023	256.345	13939.057	2290577.596	32481.2	1221915.516	676.579	1710.256	1629454.422	2897718.628	522476.878	15168.81	1259013.264	100180.824	592843.002	151745.918	527.362	6621543.828	26550.294	92648.085	315670.487	2019.319	270782.253	585279.719	279708.448	10918680.967	196768.047	11453.337	489740.712	99144.109	503402.389	8276005.595	1383997.62	408293.658
ATB-j7-exp3-ileon_299	2221.382	22.871	98.193	752.917	44683.303	10192.733	381.51	3260.158	11470.705	2228.642	41645.574	44667.529	64991.523	8056713.36	69.527	3504.772	296.945	11411.167	10126945.468	5596.49	5652.12	1537.101	695.966	2165472.913	647043.736	1388005.133	6343.022	123894.928	26253.906	962887.232	51389.686	334.815	42186.493	520.416	653.993	345462.954	1361.584	334020.005	1896.481	1278775.764	66024.971	169472.372	4981.261	1564925.717	57.934	2018.896	6787418.693	68150.003	460971.467
AKKERMANSIA-j3-exp3-ileon_283	854.023	45.68	2810.422	2475.583	47968.652	22617.521	1051.817	3187.809	12042.705	1406.896	16947.143	8489.023	51953.709	3617348.113	65.06	17086.157	148.776	6821.72	1040573.903	15968.916	303866.321	681.402	805.475	1233940.258	2063885.783	873879.323	1372.272	5274.864	32212.986	997643.445	58228.69	519.177	2510279.031	380.845	89761.745	293516.849	2298.746	363727.715	36185.134	540442.389	136153.829	67136.681	4057.636	308446.543	11.801	737.376	3716744.256	545823.511	596835.604
FECES-j7-exp3-ileon_302	11691.716	25.278	1191.677	548.2	37910.219	13858.705	546.895	2434.508	14846.192	890.074	17756.995	8411.988	24662.997	3142272.731	1353.95	8273.036	90.748	3531.924	8269760.701	5288.942	727082.343	492.335	877.125	5684921.592	392472.194	1385557.136	1844.4	7208.789	28243.818	649235.796	49940.345	403.195	3918030.842	1626.475	3533.076	251029.676	2543.846	318626.832	174575.921	594705.244	857854.439	43732.807	5744.298	309433.407	21.033	4231.441	2282406.98	381751.758	335369.747
Nacl-j3-exp3-ileon_270	805331.128	33.605	1043.055	1597.434	30754.224	8725.902	567.168	18386.56	10626.571	2466.886	7223.935	27833.972	81562.034	9342866.017	23646.237	66145.34	154.871	90780.774	864084.987	3387.355	1310543.117	792.49	1482.177	335021.86	329532.717	2052250.05	3852.206	319180.296	38075.863	740520.886	106676.481	533.335	5076454.436	116249.228	14028.967	255966.71	3299.242	328326.791	331763.063	641622.636	8261859.543	86594.534	8075.376	61251.264	31994.463	508487.85	15603927.126	325954.595	106969.73
AKKERMANSIA-j14-exp3-ileon_328	621435.948	56.551	310.733	907.317	19968.95	30312.995	664.833	5529.431	19164.335	2505.792	35209.687	27478.403	52298.708	6345689.293	4489.357	11713.357	122.147	32995.186	11284398.83	6170.167	852651.243	791.868	916.373	24646074.329	1032232.84	3388685.591	7154.799	44290.254	35265.613	676385.125	105777.736	574.432	3793473.864	2209.406	66516.327	357243.866	1037.017	340271.085	396401.038	646016.061	10955393.022	69966.864	6132.72	424542.923	86.772	504376.989	4540656.753	321002.426	220344.06
[truncated: 212 more rows]
[truncated: 112 more columns]

## Sheet: AreaCorrLog2Cen
Sid	12-dehydrocholic acid@5.31-ba	2-hydroxy-2-methylbutyric acid@3.48-sf	2-hydroxy-3-methylbutyric acid@4.59-sf	2-hydroxybutyric acid@2.50-sf	2-hydroxyglutaric acid@13.00-gc	2-oxoglutaric acid@13.01-gc	2-oxovaleric acid@14.62-sf	3-hydroxybutyric acid@1.66-sf	3-hydroxyisovaleric acid@7.82-gc	3-methylhistidine@16.87-gc	4-hydroxymandelic acid@15.21-gc	4-hydroxyproline@12.45-gc	5-aminovaleric acid@13.52-gc	5-oxoproline@12.34-gc	7,12-dihydroxy-3-oxocholanoic acid@7.00-ba	Acetic acid@1.79-sf	Acetoacetic acid@13.46-sf	Adenine@16.18-gc	Alanine@6.91-gc	Allantoin@16.53-gc	Alpha-muricholic acid@5.91-ba	Alpha-tocopherol@29.50-gc	Anthranilic acid@13.42-gc	Arabinose@14.16-gc	Arabitol@14.80-gc	Arachidonic acid@23.73-gc	Asparagine@14.11-gc	Aspartic acid@12.35-gc	Behenic acid@26.40-gc	Benzoic acid@8.76-gc	Beta-alanine@11.15-gc	Beta-hydroxypyruvic acid@14.00-sf	Beta-muricholic acid@6.17-ba	Butanoic acid@5.28-sf	Cadaverine@4.55-pa	Capric acid@11.44-gc	Caproic acid@12.09-sf	Caprylic acid@8.95-gc	Chenodeoxycholic acid@10.27-ba	Cholesterol@29.50-gc	Cholic acid@9.09-ba	Citric acid;Isocitric acid@15.80-gc	Citrulline@15.77-gc	Creatine@12.79-gc	Cytosine@12.37-gc	Deoxycholic acid@10.48-ba	Dimethylglycine@5.43-gc	Erythritol@12.29-gc	Ferulic acid@19.18-gc
[truncated: 326 more rows]
[truncated: 112 more columns]

[truncated: 1 more sheets: RatioInfos]
