# Supplementary material for: Oral administration of Akkermansia muciniphila elevates systemic antiaging and anticancer metabolites
Source: Aging (Albany NY). 2021 Mar 2;13(5):6375–405. doi: 10.18632/aging.202739 (PMC7993698; doi:10.18632/aging.202739)
Supplement: Supplementary Table 2 [file aging-13-202739-s003.xlsx]

## Sheet: SampleInfos
Supplementary Table 2. Related to Figure 2 and Supplementary Figure 2. Targeted metabolomics analysis from COLON samples from mice receiving oral gavages with several commensals or PBS (control), or continuous ATB, at days 3, 7 and 14 after the first oral gavage.
Sid	sType	InjOrder	Grp	Color
BlM-exp2-colon_pre	Bl	5	-	-
BlM_exp1-colon_pre	Bl	11	-	-
BlM-exp2-colon_post	Bl	53	-	-
BlM-exp1-colon_pre	Bl	61	-	-
BlM_exp3-colon_pre	Bl	126	-	-
BlM_exp1-colon_post	Bl	143	-	-
BlM_exp2-colon_pre	Bl	156	-	-
BlM-exp1-colon_post	Bl	250	-	-
BlM-exp3-colon_pre	Bl	258	-	-
BlM_exp3-colon_post	Bl	289	-	-
BlM_exp2-colon_post	Bl	303	-	-
BlM-exp3-colon_post	Bl	313	-	-
QC_batch-exp2-colon_5d	QC	7	QC	#737373
QC_exp123-colon_pre.bacolon3	QC	8	QC	#737373
QC_batch-exp2-colon_5e	QC	9	QC	#737373
QC_batch-exp2-colon_5f	QC	10	QC	#737373
QC_exp1-colon_5a	QC	12	QC	#737373
QC_batch-exp2-colon_5g	QC	13	QC	#737373
QC_exp1-colon_5b	QC	14	QC	#737373
QC_batch-exp2-colon_5h	QC	20	QC	#737373
QC_exp1-colon_6a	QC	21	QC	#737373
QC_exp1-colon_5c	QC	25	QC	#737373
QC_batch-exp2-colon_5i	QC	33	QC	#737373
QC_exp1-colon_6b	QC	36	QC	#737373
QC_exp1-colon_5d	QC	40	QC	#737373
QC_batch-exp2-colon_5j	QC	51	QC	#737373
QC_exp1-colon_6c	QC	54	QC	#737373
QC_exp123-colon_post.bacolon3	QC	57	QC	#737373
QC-exp1-colon_5a	QC	64	QC	#737373
QC_exp123-colon_pre.bacolon1	QC	72	QC	#737373
QC-exp1-colon_5b	QC	80	QC	#737373
QC_exp1-colon_6d	QC	82	QC	#737373
QC_exp123-exp1-colon_6b	QC	83	QC	#737373
QC_exp1-colon_5e	QC	85	QC	#737373
QC-exp1-colon_5c	QC	101	QC	#737373
QC_exp1-colon_5f	QC	105	QC	#737373
QC-exp1-colon_5d	QC	127	QC	#737373
QC_exp3-colon_5a	QC	130	QC	#737373
QC_exp1-colon_5g	QC	136	QC	#737373
QC_exp3-colon_5d	QC	152	QC	#737373
QC_exp2-colon_5a	QC	160	QC	#737373
QC_exp3-colon_5b	QC	167	QC	#737373
QC-exp1-colon_5e	QC	170	QC	#737373
QC_exp2-colon_6a	QC	174	QC	#737373
QC_exp1-colon_5h	QC	179	QC	#737373
QC_exp3-colon_5e	QC	185	QC	#737373
QC_exp2-colon_5b	QC	190	QC	#737373
QC_exp3-colon_5c	QC	196	QC	#737373
QC_exp2-colon_6b	QC	199	QC	#737373
QC-exp1-colon_5f	QC	201	QC	#737373
QC_exp3-colon_5f	QC	212	QC	#737373
QC_exp2-colon_5c	QC	215	QC	#737373
QC-exp1-colon_5g	QC	227	QC	#737373
QC_exp2-colon_6c	QC	228	QC	#737373
QC_exp3-colon_5g	QC	240	QC	#737373
QC-exp1-colon_5h	QC	248	QC	#737373
QC_exp2-colon_6d	QC	251	QC	#737373
QC-exp3-colon_5a	QC	262	QC	#737373
QC_exp2-colon_5d	QC	263	QC	#737373
QC_exp123-colon_post.bacolon1	QC	265	QC	#737373
QC_exp1-colon_5hb	QC	273	QC	#737373
QC_exp123-colon_pre.bacolon2	QC	280	QC	#737373
QC-exp3-colon_5b	QC	282	QC	#737373
QC_exp2-colon_5e	QC	284	QC	#737373
QC-exp3-colon_5c	QC	296	QC	#737373
QC_exp2-colon_5f	QC	300	QC	#737373
QC-exp3-colon_5d	QC	305	QC	#737373
QC_exp3-colon_6a	QC	306	QC	#737373
QC_exp2-colon_5g	QC	307	QC	#737373
QC-exp3-colon_5e	QC	308	QC	#737373
QC_exp3-colon_6b	QC	309	QC	#737373
QC_exp3-colon_6c	QC	310	QC	#737373
QC-exp3-colon_5f	QC	311	QC	#737373
QC-exp3-colon_5g	QC	312	QC	#737373
QC_exp3-colon_6d	QC	314	QC	#737373
QC_exp123-colon_post.bacolon2	QC	319	QC	#737373
ATB-j7-exp1-colon_291	Sa	15	ATB j7 exp1 colon	#EF3B2C
HIRAE-j14-exp1-colon_323	Sa	16	HIRAE j14 exp1 colon	#54278F
Nacl-j7-exp1-colon_283	Sa	17	Nacl j7 exp1 colon	#006D2C
FRAGILIS-j7-exp1-colon_305	Sa	18	FRAGILIS j7 exp1 colon	#B58943
FRAGILIS-j7-exp1-colon_301	Sa	19	FRAGILIS j7 exp1 colon	#B58943
ATB-j3-exp1-colon_259	Sa	22	ATB j3 exp1 colon	#FB6A4A
ATB-j3-exp1-colon_263	Sa	23	ATB j3 exp1 colon	#FB6A4A
ATB-j7-exp1-colon_293	Sa	24	ATB j7 exp1 colon	#EF3B2C
BARNECIELA-j3-exp1-colon_277	Sa	26	BARNECIELA j3 exp1 colon	#6BAED6
HIRAE-j3-exp1-colon_269	Sa	27	HIRAE j3 exp1 colon	#9E9AC8
ATB-j14-exp1-colon_314	Sa	28	ATB j14 exp1 colon	#A50F15
BARNECIELA-j3-exp1-colon_279	Sa	29	BARNECIELA j3 exp1 colon	#6BAED6
BARNECIELA-j7-exp1-colon_309	Sa	30	BARNECIELA j7 exp1 colon	#397FB9
HIRAE-j7-exp1-colon_297	Sa	31	HIRAE j7 exp1 colon	#7960AB
FRAGILIS-j14-exp1-colon_327	Sa	32	FRAGILIS j14 exp1 colon	#DFC27D
Nacl-j7-exp1-colon_287	Sa	34	Nacl j7 exp1 colon	#006D2C
HIRAE-j7-exp1-colon_299	Sa	35	HIRAE j7 exp1 colon	#7960AB
HIRAE-j14-exp1-colon_319	Sa	37	HIRAE j14 exp1 colon	#54278F
Nacl-j3-exp1-colon_253	Sa	38	Nacl j3 exp1 colon	#41AB5D
HIRAE-j3-exp1-colon_267	Sa	39	HIRAE j3 exp1 colon	#9E9AC8
BARNECIELA-j14-exp1-colon_336	Sa	41	BARNECIELA j14 exp1 colon	#08519C
FRAGILIS-j14-exp1-colon_328	Sa	42	FRAGILIS j14 exp1 colon	#DFC27D
FRAGILIS-j7-exp1-colon_306	Sa	43	FRAGILIS j7 exp1 colon	#B58943
ATB-j14-exp1-colon_316	Sa	44	ATB j14 exp1 colon	#A50F15
FRAGILIS-j3-exp1-colon_274	Sa	45	FRAGILIS j3 exp1 colon	#8C510A
BARNECIELA-j14-exp1-colon_331	Sa	46	BARNECIELA j14 exp1 colon	#08519C
BARNECIELA-j7-exp1-colon_310	Sa	47	BARNECIELA j7 exp1 colon	#397FB9
Nacl-j3-exp1-colon_255	Sa	48	Nacl j3 exp1 colon	#41AB5D
ATB-j14-exp1-colon_317	Sa	49	ATB j14 exp1 colon	#A50F15
Nacl-j7-exp1-colon_285	Sa	50	Nacl j7 exp1 colon	#006D2C
ATB-j3-exp1-colon_261	Sa	52	ATB j3 exp1 colon	#FB6A4A
HIRAE-j7-exp1-colon_295	Sa	55	HIRAE j7 exp1 colon	#7960AB
Nacl-j3-exp1-colon_257	Sa	58	Nacl j3 exp1 colon	#41AB5D
FRAGILIS-j14-exp1-colon_325	Sa	60	FRAGILIS j14 exp1 colon	#DFC27D
FRAGILIS-j14-exp1-colon_330	Sa	63	FRAGILIS j14 exp1 colon	#DFC27D
FRAGILIS-j7-exp1-colon_303	Sa	67	FRAGILIS j7 exp1 colon	#B58943
FRAGILIS-j3-exp1-colon_273	Sa	68	FRAGILIS j3 exp1 colon	#8C510A
Nacl-j3-exp1-colon_254	Sa	70	Nacl j3 exp1 colon	#41AB5D
FRAGILIS-j3-exp1-colon_275	Sa	71	FRAGILIS j3 exp1 colon	#8C510A
HIRAE-j14-exp1-colon_324	Sa	73	HIRAE j14 exp1 colon	#54278F
ATB-j7-exp1-colon_289	Sa	74	ATB j7 exp1 colon	#EF3B2C
ATB-j14-exp1-colon_315	Sa	75	ATB j14 exp1 colon	#A50F15
ATB-j7-exp1-colon_290	Sa	76	ATB j7 exp1 colon	#EF3B2C
BARNECIELA-j7-exp1-colon_307	Sa	77	BARNECIELA j7 exp1 colon	#397FB9
BARNECIELA-j3-exp1-colon_280	Sa	78	BARNECIELA j3 exp1 colon	#6BAED6
Nacl-j7-exp1-colon_286	Sa	79	Nacl j7 exp1 colon	#006D2C
Nacl-j3-exp1-colon_256	Sa	81	Nacl j3 exp1 colon	#41AB5D
BARNECIELA-j7-exp1-colon_311	Sa	84	BARNECIELA j7 exp1 colon	#397FB9
HIRAE-j7-exp1-colon_298	Sa	86	HIRAE j7 exp1 colon	#7960AB
HIRAE-j3-exp1-colon_268	Sa	89	HIRAE j3 exp1 colon	#9E9AC8
FRAGILIS-j3-exp1-colon_271	Sa	90	FRAGILIS j3 exp1 colon	#8C510A
BARNECIELA-j3-exp1-colon_281	Sa	93	BARNECIELA j3 exp1 colon	#6BAED6
HIRAE-j3-exp1-colon_265	Sa	94	HIRAE j3 exp1 colon	#9E9AC8
HIRAE-j14-exp1-colon_321	Sa	95	HIRAE j14 exp1 colon	#54278F
BARNECIELA-j14-exp1-colon_332	Sa	96	BARNECIELA j14 exp1 colon	#08519C
BARNECIELA-j14-exp1-colon_335	Sa	97	BARNECIELA j14 exp1 colon	#08519C
FRAGILIS-j7-exp1-colon_302	Sa	98	FRAGILIS j7 exp1 colon	#B58943
ATB-j3-exp1-colon_262	Sa	99	ATB j3 exp1 colon	#FB6A4A
HIRAE-j3-exp1-colon_266	Sa	100	HIRAE j3 exp1 colon	#9E9AC8
FRAGILIS-j14-exp1-colon_329	Sa	102	FRAGILIS j14 exp1 colon	#DFC27D
ATB-j7-exp1-colon_292	Sa	103	ATB j7 exp1 colon	#EF3B2C
ATB-j14-exp1-colon_313	Sa	104	ATB j14 exp1 colon	#A50F15
Nacl-j3-exp1-colon_258	Sa	106	Nacl j3 exp1 colon	#41AB5D
Nacl-j3-exp2-colon_200	Sa	107	Nacl j3 exp2 colon	#41AB5D
HIRAE-j14-exp1-colon_320	Sa	108	HIRAE j14 exp1 colon	#54278F
ATB-j3-exp2-colon_208	Sa	109	ATB j3 exp2 colon	#FB6A4A
ATB-j3-exp1-colon_260	Sa	110	ATB j3 exp1 colon	#FB6A4A
MITSUAKI-j3-exp2-colon_220	Sa	111	MITSUAKI j3 exp2 colon	#FD8D3C
HIRAE-j7-exp1-colon_296	Sa	112	HIRAE j7 exp1 colon	#7960AB
ATB-j7-exp2-colon_232	Sa	113	ATB j7 exp2 colon	#EF3B2C
FRAGILIS-j3-exp1-colon_272	Sa	114	FRAGILIS j3 exp1 colon	#8C510A
MITSUAKI-j7-exp2-colon_244	Sa	115	MITSUAKI j7 exp2 colon	#D1611F
BARNECIELA-j7-exp1-colon_308	Sa	116	BARNECIELA j7 exp1 colon	#397FB9
BURKO-j3-exp2-colon_214	Sa	117	BURKO j3 exp2 colon	#80CDC1
Nacl-j7-exp1-colon_288	Sa	118	Nacl j7 exp1 colon	#006D2C
ATB-j14-exp2-colon_251	Sa	119	ATB j14 exp2 colon	#A50F15
FRAGILIS-j3-exp1-colon_276	Sa	120	FRAGILIS j3 exp1 colon	#8C510A
Nacl-j3-exp2-colon_201	Sa	121	Nacl j3 exp2 colon	#41AB5D
Nacl-j7-exp2-colon_227	Sa	122	Nacl j7 exp2 colon	#006D2C
ATB-j14-exp1-colon_318	Sa	123	ATB j14 exp1 colon	#A50F15
MITSUAKI-j3-exp2-colon_222	Sa	124	MITSUAKI j3 exp2 colon	#FD8D3C
BURKO-j14-exp2-colon_257	Sa	125	BURKO j14 exp2 colon	#01665E
ATB-j3-exp2-colon_210	Sa	128	ATB j3 exp2 colon	#FB6A4A
MITSUAKI-j14-exp2-colon_263	Sa	129	MITSUAKI j14 exp2 colon	#A63603
BARNECIELA-j14-exp1-colon_333	Sa	131	BARNECIELA j14 exp1 colon	#08519C
BURKO-j3-exp2-colon_216	Sa	132	BURKO j3 exp2 colon	#80CDC1
BURKO-j7-exp2-colon_238	Sa	133	BURKO j7 exp2 colon	#40998F
BARNECIELA-j3-exp1-colon_282	Sa	134	BARNECIELA j3 exp1 colon	#6BAED6
MITSUAKI-j7-exp2-colon_243	Sa	135	MITSUAKI j7 exp2 colon	#D1611F
HIRAE-j7-exp1-colon_300	Sa	137	HIRAE j7 exp1 colon	#7960AB
Nacl-j7-exp2-colon_226	Sa	138	Nacl j7 exp2 colon	#006D2C
BURKO-j3-exp2-colon_213	Sa	139	BURKO j3 exp2 colon	#80CDC1
HIRAE-j3-exp1-colon_270	Sa	140	HIRAE j3 exp1 colon	#9E9AC8
MITSUAKI-j7-exp2-colon_245	Sa	141	MITSUAKI j7 exp2 colon	#D1611F
Nacl-j3-exp2-colon_203	Sa	142	Nacl j3 exp2 colon	#41AB5D
FRAGILIS-j14-exp1-colon_326	Sa	144	FRAGILIS j14 exp1 colon	#DFC27D
ATB-j3-exp2-colon_207	Sa	145	ATB j3 exp2 colon	#FB6A4A
BARNECIELA-j3-exp1-colon_278	Sa	146	BARNECIELA j3 exp1 colon	#6BAED6
MITSUAKI-j14-exp2-colon_261	Sa	147	MITSUAKI j14 exp2 colon	#A63603
MITSUAKI-j3-exp2-colon_219	Sa	148	MITSUAKI j3 exp2 colon	#FD8D3C
FRAGILIS-j7-exp1-colon_304	Sa	149	FRAGILIS j7 exp1 colon	#B58943
ATB-j7-exp2-colon_230	Sa	150	ATB j7 exp2 colon	#EF3B2C
BURKO-j7-exp2-colon_237	Sa	151	BURKO j7 exp2 colon	#40998F
BARNECIELA-j7-exp1-colon_312	Sa	153	BARNECIELA j7 exp1 colon	#397FB9
BURKO-j7-exp2-colon_236	Sa	154	BURKO j7 exp2 colon	#40998F
ATB-j7-exp2-colon_231	Sa	155	ATB j7 exp2 colon	#EF3B2C
Nacl-j7-exp1-colon_284	Sa	157	Nacl j7 exp1 colon	#006D2C
Nacl-j7-exp2-colon_224	Sa	158	Nacl j7 exp2 colon	#006D2C
MITSUAKI-j14-exp2-colon_262	Sa	159	MITSUAKI j14 exp2 colon	#A63603
BARNECIELA-j14-exp1-colon_334	Sa	161	BARNECIELA j14 exp1 colon	#08519C
ATB-j7-exp2-colon_233	Sa	162	ATB j7 exp2 colon	#EF3B2C
BURKO-j14-exp2-colon_256	Sa	163	BURKO j14 exp2 colon	#01665E
BURKO-j3-exp2-colon_212	Sa	164	BURKO j3 exp2 colon	#80CDC1
ATB-j14-exp2-colon_250	Sa	165	ATB j14 exp2 colon	#A50F15
ATB-j3-exp1-colon_264	Sa	166	ATB j3 exp1 colon	#FB6A4A
Nacl-j3-exp2-colon_202	Sa	168	Nacl j3 exp2 colon	#41AB5D
Nacl-j7-exp2-colon_225	Sa	169	Nacl j7 exp2 colon	#006D2C
HIRAE-j14-exp1-colon_322	Sa	171	HIRAE j14 exp1 colon	#54278F
MITSUAKI-j3-exp2-colon_218	Sa	172	MITSUAKI j3 exp2 colon	#FD8D3C
ATB-j3-exp2-colon_206	Sa	173	ATB j3 exp2 colon	#FB6A4A
BURKO-j7-exp2-colon_240	Sa	175	BURKO j7 exp2 colon	#40998F
BURKO-j14-exp2-colon_255	Sa	176	BURKO j14 exp2 colon	#01665E
ATB-j14-exp2-colon_248	Sa	177	ATB j14 exp2 colon	#A50F15
Nacl-j3-exp3-colon_201	Sa	178	Nacl j3 exp3 colon	#41AB5D
FECES-j3-exp3-colon_214	Sa	180	FECES j3 exp3 colon	#DF65B0
MITSUAKI-j7-exp2-colon_242	Sa	181	MITSUAKI j7 exp2 colon	#D1611F
ATB-j14-exp2-colon_249	Sa	182	ATB j14 exp2 colon	#A50F15
AKKERMANSIA-j14-exp3-colon_261	Sa	183	AKKER j14 exp3 colon	#4D9221
BURKO-j14-exp2-colon_254	Sa	184	BURKO j14 exp2 colon	#01665E
Nacl-j7-exp3-colon_225	Sa	186	Nacl j7 exp3 colon	#006D2C
MITSUAKI-j14-exp2-colon_260	Sa	187	MITSUAKI j14 exp2 colon	#A63603
ATB-j3-exp3-colon_207	Sa	188	ATB j3 exp3 colon	#FB6A4A
ATB-j3-exp2-colon_209	Sa	189	ATB j3 exp2 colon	#FB6A4A
FECES-j7-exp3-colon_238	Sa	191	FECES j7 exp3 colon	#BB3279
BURKO-j7-exp2-colon_235	Sa	192	BURKO j7 exp2 colon	#40998F
AKKERMANSIA-j3-exp3-colon_220	Sa	193	AKKER j3 exp3 colon	#B8E186
ATB-j7-exp2-colon_234	Sa	194	ATB j7 exp2 colon	#EF3B2C
ATB-j14-exp3-colon_248	Sa	195	ATB j14 exp3 colon	#A50F15
Nacl-j7-exp2-colon_223	Sa	197	Nacl j7 exp2 colon	#006D2C
FECES-j14-exp3-colon_257	Sa	198	FECES j14 exp3 colon	#980043
BURKO-j3-exp2-colon_211	Sa	200	BURKO j3 exp2 colon	#80CDC1
Nacl-j3-exp2-colon_199	Sa	202	Nacl j3 exp2 colon	#41AB5D
Nacl-j3-exp3-colon_203	Sa	203	Nacl j3 exp3 colon	#41AB5D
ATB-j3-exp2-colon_205	Sa	204	ATB j3 exp2 colon	#FB6A4A
AKKERMANSIA-j7-exp3-colon_241	Sa	205	AKKER j7 exp3 colon	#7FBC41
MITSUAKI-j3-exp2-colon_217	Sa	206	MITSUAKI j3 exp2 colon	#FD8D3C
FECES-j7-exp3-colon_235	Sa	207	FECES j7 exp3 colon	#BB3279
ATB-j3-exp3-colon_206	Sa	208	ATB j3 exp3 colon	#FB6A4A
ATB-j7-exp2-colon_229	Sa	209	ATB j7 exp2 colon	#EF3B2C
AKKERMANSIA-j14-exp3-colon_263	Sa	210	AKKER j14 exp3 colon	#4D9221
BURKO-j14-exp2-colon_253	Sa	211	BURKO j14 exp2 colon	#01665E
Nacl-j7-exp3-colon_224	Sa	213	Nacl j7 exp3 colon	#006D2C
Nacl-j3-exp2-colon_204	Sa	214	Nacl j3 exp2 colon	#41AB5D
FECES-j3-exp3-colon_212	Sa	216	FECES j3 exp3 colon	#DF65B0
ATB-j14-exp2-colon_252	Sa	217	ATB j14 exp2 colon	#A50F15
AKKERMANSIA-j3-exp3-colon_218	Sa	218	AKKER j3 exp3 colon	#B8E186
MITSUAKI-j14-exp2-colon_259	Sa	219	MITSUAKI j14 exp2 colon	#A63603
ATB-j7-exp3-colon_231	Sa	220	ATB j7 exp3 colon	#EF3B2C
ATB-j7-exp3-colon_230	Sa	221	ATB j7 exp3 colon	#EF3B2C
MITSUAKI-j3-exp2-colon_221	Sa	222	MITSUAKI j3 exp2 colon	#FD8D3C
Nacl-j3-exp3-colon_202	Sa	223	Nacl j3 exp3 colon	#41AB5D
BURKO-j14-exp2-colon_258	Sa	224	BURKO j14 exp2 colon	#01665E
AKKERMANSIA-j14-exp3-colon_259	Sa	225	AKKER j14 exp3 colon	#4D9221
MITSUAKI-j7-exp2-colon_246	Sa	226	MITSUAKI j7 exp2 colon	#D1611F
BURKO-j7-exp2-colon_239	Sa	229	BURKO j7 exp2 colon	#40998F
ATB-j3-exp3-colon_209	Sa	230	ATB j3 exp3 colon	#FB6A4A
Nacl-j7-exp2-colon_228	Sa	231	Nacl j7 exp2 colon	#006D2C
FECES-j7-exp3-colon_239	Sa	232	FECES j7 exp3 colon	#BB3279
MITSUAKI-j7-exp2-colon_241	Sa	233	MITSUAKI j7 exp2 colon	#D1611F
AKKERMANSIA-j7-exp3-colon_244	Sa	234	AKKER j7 exp3 colon	#7FBC41
ATB-j14-exp2-colon_247	Sa	235	ATB j14 exp2 colon	#A50F15
ATB-j14-exp3-colon_251	Sa	236	ATB j14 exp3 colon	#A50F15
BURKO-j3-exp2-colon_215	Sa	237	BURKO j3 exp2 colon	#80CDC1
Nacl-j7-exp3-colon_226	Sa	238	Nacl j7 exp3 colon	#006D2C
MITSUAKI-j14-exp2-colon_264	Sa	239	MITSUAKI j14 exp2 colon	#A63603
FECES-j14-exp3-colon_256	Sa	241	FECES j14 exp3 colon	#980043
ATB-j7-exp3-colon_233	Sa	242	ATB j7 exp3 colon	#EF3B2C
AKKERMANSIA-j3-exp3-colon_217	Sa	243	AKKER j3 exp3 colon	#B8E186
FECES-j7-exp3-colon_236	Sa	244	FECES j7 exp3 colon	#BB3279
Nacl-j3-exp3-colon_204	Sa	245	Nacl j3 exp3 colon	#41AB5D
AKKERMANSIA-j14-exp3-colon_262	Sa	246	AKKER j14 exp3 colon	#4D9221
ATB-j3-exp3-colon_205	Sa	247	ATB j3 exp3 colon	#FB6A4A
FECES-j14-exp3-colon_258	Sa	249	FECES j14 exp3 colon	#980043
Nacl-j3-exp3-colon_200	Sa	253	Nacl j3 exp3 colon	#41AB5D
ATB-j14-exp3-colon_250	Sa	257	ATB j14 exp3 colon	#A50F15
AKKERMANSIA-j3-exp3-colon_221	Sa	261	AKKER j3 exp3 colon	#B8E186
FECES-j7-exp3-colon_237	Sa	264	FECES j7 exp3 colon	#BB3279
ATB-j7-exp3-colon_232	Sa	266	ATB j7 exp3 colon	#EF3B2C
FECES-j3-exp3-colon_215	Sa	267	FECES j3 exp3 colon	#DF65B0
AKKERMANSIA-j14-exp3-colon_260	Sa	268	AKKER j14 exp3 colon	#4D9221
Nacl-j7-exp3-colon_223	Sa	270	Nacl j7 exp3 colon	#006D2C
AKKERMANSIA-j7-exp3-colon_242	Sa	271	AKKER j7 exp3 colon	#7FBC41
FECES-j3-exp3-colon_213	Sa	274	FECES j3 exp3 colon	#DF65B0
AKKERMANSIA-j7-exp3-colon_243	Sa	276	AKKER j7 exp3 colon	#7FBC41
ATB-j3-exp3-colon_208	Sa	278	ATB j3 exp3 colon	#FB6A4A
AKKERMANSIA-j14-exp3-colon_264	Sa	279	AKKER j14 exp3 colon	#4D9221
FECES-j7-exp3-colon_240	Sa	281	FECES j7 exp3 colon	#BB3279
ATB-j14-exp3-colon_249	Sa	283	ATB j14 exp3 colon	#A50F15
Nacl-j7-exp3-colon_228	Sa	285	Nacl j7 exp3 colon	#006D2C
ATB-j7-exp3-colon_229	Sa	286	ATB j7 exp3 colon	#EF3B2C
FECES-j14-exp3-colon_253	Sa	287	FECES j14 exp3 colon	#980043
Nacl-j3-exp3-colon_199	Sa	288	Nacl j3 exp3 colon	#41AB5D
AKKERMANSIA-j3-exp3-colon_219	Sa	290	AKKER j3 exp3 colon	#B8E186
ATB-j14-exp3-colon_252	Sa	291	ATB j14 exp3 colon	#A50F15
AKKERMANSIA-j7-exp3-colon_245	Sa	292	AKKER j7 exp3 colon	#7FBC41
ATB-j7-exp3-colon_234	Sa	293	ATB j7 exp3 colon	#EF3B2C
Nacl-j7-exp3-colon_227	Sa	294	Nacl j7 exp3 colon	#006D2C
FECES-j14-exp3-colon_254	Sa	295	FECES j14 exp3 colon	#980043
ATB-j3-exp3-colon_210	Sa	297	ATB j3 exp3 colon	#FB6A4A
AKKERMANSIA-j3-exp3-colon_222	Sa	298	AKKER j3 exp3 colon	#B8E186
FECES-j3-exp3-colon_216	Sa	299	FECES j3 exp3 colon	#DF65B0
ATB-j14-exp3-colon_247	Sa	301	ATB j14 exp3 colon	#A50F15
AKKERMANSIA-j7-exp3-colon_246	Sa	302	AKKER j7 exp3 colon	#7FBC41
FECES-j14-exp3-colon_255	Sa	304	FECES j14 exp3 colon	#980043
St_SCFA-exp2-colon_pre	St	1	-	-
St_PA-exp1-colon_pre	St	2	-	-
St_BA1-exp3-colon_pre	St	3	-	-
St_AA-exp1-colon_pre	St	4	-	-
St_BA2-exp3-colon_pre	St	6	-	-
St_SCFA-exp2-colon_post	St	56	-	-
St_SCFA1-exp1-colon_pre	St	59	-	-
St_BA2-exp3-colon_post	St	62	-	-
St_BA1-exp3-colon_post	St	65	-	-
St_BA1-exp1-colon_pre	St	66	-	-
St_BA2-exp1-colon_pre	St	69	-	-
St_PA-exp1-colon_post	St	87	-	-
St_AA-exp1-colon_post	St	88	-	-
St_PA-exp2-colon_pre	St	91	-	-
St_AA_exp2-colon_pre	St	92	-	-
St_SCFA1-exp1-colon_post	St	252	-	-
St_SCFA-exp3-colon_pre	St	254	-	-
St_PA-exp2-colon_post	St	255	-	-
St_AA_exp2-colon_post	St	256	-	-
St_PA-exp3-colon_pre	St	259	-	-
St_AA_exp3-colon_pre	St	260	-	-
St_BA2-exp1-colon_post	St	269	-	-
St_BA1-exp1-colon_post	St	272	-	-
St_BA1-exp2-colon_pre	St	275	-	-
St_BA2-exp2-colon_pre	St	277	-	-
St_SCFA-exp3-colon_post	St	315	-	-
St_PA-exp3-colon_post	St	316	-	-
St_AA_exp3-colon_post	St	317	-	-
St_cadaverine-exp3-colon_7a	St	318	-	-
St_BA2-exp2-colon_post	St	320	-	-
St_BA1-exp2-colon_post	St	321	-	-

## Sheet: FileInfos
Sid	File.sf	Date.sf	Name.sf	Batch.sf	InjOrder.sf	File.pa	Date.pa	Name.pa	Batch.pa	InjOrder.pa	File.ba	Date.ba	Name.ba	Batch.ba	InjOrder.ba	File.gc	Date.gc	Name.gc	Batch.gc	InjOrder.gc
BlM-exp2-colon_pre	Bl_matrice-exp2-colon_SF_3b.d	(02/17/17 00:00:00)	Bl_matrice-exp2-colon_SF_3b	sfcolon2	2	-	(NA NA)	-	-	-	-	(NA NA)	-	-	-	-	(NA NA)	-	-	-
BlM_exp1-colon_pre	-	(NA NA)	-	-	-	Bl_matrice-exp1-colon_PA_3a.d	(04/12/17 00:00:00)	Bl_matrice-exp1-colon_PA_3a	pacolon1	2	Bl_matrice-exp1-colon_BA_4a.d	(01/15/17 00:00:00)	Bl_matrice-exp1-colon_BA_4a	bacolon1	83	Bl_matrice-exp1-colon_GCMRM_4a.D	(01/27/17 00:00:00)	Bl_matrice-exp1-colon_4a	gccolon1	2
BlM-exp2-colon_post	Bl_matrice-exp2-colon_SF_3c.d	(02/20/17 00:00:00)	Bl_matrice-exp2-colon_SF_3c	sfcolon2	76	-	(NA NA)	-	-	-	-	(NA NA)	-	-	-	-	(NA NA)	-	-	-
BlM-exp1-colon_pre	Bl_matrice-exp1-colon_SF_3a.d	(02/20/17 00:00:00)	Bl_matrice-exp1-colon_SF_3a	sfcolon1	79	-	(NA NA)	-	-	-	-	(NA NA)	-	-	-	-	(NA NA)	-	-	-
BlM_exp3-colon_pre	-	(NA NA)	-	-	-	Bl_matrice-exp3-colon_PA_3a.d	(04/15/17 00:00:00)	Bl_matrice-exp3-colon_PA_3a	pacolon3	175	Bl_matrice-exp3-colon_BA_4a.d	(01/12/17 00:00:00)	Bl_matrice-exp3-colon_BA_4a	bacolon3	3	Bl_matrice-exp3-colon_GCMRM_4a.D	(02/08/17 00:00:00)	Bl_matrice-exp3-colon_4a	gccolon3	175
BlM_exp1-colon_post	-	(NA NA)	-	-	-	Bl_matrice-exp1-colon_PA_3b.d	(04/12/17 00:00:00)	Bl_matrice-exp1-colon_PA_3b	pacolon1	95	Bl_matrice-exp1-colon_BA_4b.d	(01/18/17 00:00:00)	Bl_matrice-exp1-colon_BA_4b	bacolon1	177	Bl_matrice-exp1-colon_GCMRM_4b.D	(01/27/17 00:00:00)	Bl_matrice-exp1-colon_4b	gccolon1	95
BlM_exp2-colon_pre	-	(NA NA)	-	-	-	Bl_matrice-exp2-colon_PA_3a.d	(04/12/17 00:00:00)	Bl_matrice-exp2-colon_PA_3a	pacolon2	98	Bl_matrice-exp2-colon_BA_4a.d	(01/18/17 00:00:00)	Bl_matrice-exp2-colon_BA_4a	bacolon2	183	Bl_matrice-exp2-colon_GCMRM_4a.D	(02/02/17 00:00:00)	Bl_matrice-exp2-colon_4a	gccolon2	98
BlM-exp1-colon_post	Bl_matrice-exp1-colon_SF_3b.d	(02/23/17 00:00:00)	Bl_matrice-exp1-colon_SF_3b	sfcolon1	171	-	(NA NA)	-	-	-	-	(NA NA)	-	-	-	-	(NA NA)	-	-	-
BlM-exp3-colon_pre	Bl_matrice-exp3-colon_SF_3a.d	(02/23/17 00:00:00)	Bl_matrice-exp3-colon_SF_3a	sfcolon3	174	-	(NA NA)	-	-	-	-	(NA NA)	-	-	-	-	(NA NA)	-	-	-
BlM_exp3-colon_post	-	(NA NA)	-	-	-	Bl_matrice-exp3-colon_PA_3b.d	(04/15/17 00:00:00)	Bl_matrice-exp3-colon_PA_3b	pacolon3	248	Bl_matrice-exp3-colon_BA_4b.d	(01/15/17 00:00:00)	Bl_matrice-exp3-colon_BA_4b	bacolon3	78	Bl_matrice-exp3-colon_GCMRM_4b.D	(02/11/17 00:00:00)	Bl_matrice-exp3-colon_4b	gccolon3	248
BlM_exp2-colon_post	-	(NA NA)	-	-	-	Bl_matrice-exp2-colon_PA_4b.d	(04/15/17 00:00:00)	Bl_matrice-exp2-colon_PA_4b	pacolon2	172	Bl_matrice-exp2-colon_BA_4b.d	(01/18/17 00:00:00)	Bl_matrice-exp2-colon_BA_4b	bacolon2	259	Bl_matrice-exp2-colon_GCMRM_4b.D	(02/05/17 00:00:00)	Bl_matrice-exp2-colon_4b	gccolon2	172
BlM-exp3-colon_post	Bl_matrice-exp3-colon_SF_3b.d	(02/23/17 00:00:00)	Bl_matrice-exp3-colon_SF_3b	sfcolon3	247	-	(NA NA)	-	-	-	-	(NA NA)	-	-	-	-	(NA NA)	-	-	-
QC_batch-exp2-colon_5d	QC_batch-exp2-colon_SF_5d.d	(02/17/17 00:00:00)	QC_batch-exp2-colon_SF_5d	sfcolon2	3	-	(NA NA)	-	-	-	-	(NA NA)	-	-	-	-	(NA NA)	-	-	-
QC_exp123-colon_pre.bacolon3	-	(NA NA)	-	-	-	-	(NA NA)	-	-	-	QC_batch-exp123-colon_BA_6a.d	(01/15/17 00:00:00)	QC_batch-exp123-colon_BA_6a	bacolon3	4	-	(NA NA)	-	-	-
QC_batch-exp2-colon_5e	QC_batch-exp2-colon_SF_5e.d	(02/17/17 00:00:00)	QC_batch-exp2-colon_SF_5e	sfcolon2	11	-	(NA NA)	-	-	-	-	(NA NA)	-	-	-	-	(NA NA)	-	-	-
QC_batch-exp2-colon_5f	QC_batch-exp2-colon_SF_5f.d	(02/17/17 00:00:00)	QC_batch-exp2-colon_SF_5f	sfcolon2	22	-	(NA NA)	-	-	-	-	(NA NA)	-	-	-	-	(NA NA)	-	-	-
QC_exp1-colon_5a	-	(NA NA)	-	-	-	QC_batch-exp1-colon_PA_5a.d	(04/12/17 00:00:00)	QC_batch-exp1-colon_PA_5a	pacolon1	3	QC_batch-exp1-colon_BA_5a.d	(01/18/17 00:00:00)	QC_batch-exp1-colon_BA_5a	bacolon1	85	QC_batch-exp1-colon_GCMRM_5a.D	(01/27/17 00:00:00)	QC_batch-exp1-colon_5a	gccolon1	3
QC_batch-exp2-colon_5g	QC_batch-exp2-colon_SF_5g.d	(02/17/17 00:00:00)	QC_batch-exp2-colon_SF_5g	sfcolon2	35	-	(NA NA)	-	-	-	-	(NA NA)	-	-	-	-	(NA NA)	-	-	-
QC_exp1-colon_5b	-	(NA NA)	-	-	-	QC_batch-exp1-colon_PA_5b.d	(04/12/17 00:00:00)	QC_batch-exp1-colon_PA_5b	pacolon1	16	QC_batch-exp1-colon_BA_5b.d	(01/18/17 00:00:00)	QC_batch-exp1-colon_BA_5b	bacolon1	97	QC_batch-exp1-colon_GCMRM_5b.D	(01/27/17 00:00:00)	QC_batch-exp1-colon_5b	gccolon1	14
QC_batch-exp2-colon_5h	QC_batch-exp2-colon_SF_5h.d	(02/17/17 00:00:00)	QC_batch-exp2-colon_SF_5h	sfcolon2	50	-	(NA NA)	-	-	-	-	(NA NA)	-	-	-	-	(NA NA)	-	-	-
QC_exp1-colon_6a	-	(NA NA)	-	-	-	-	(NA NA)	-	-	-	-	(NA NA)	-	-	-	QC_batch-exp1-colon_GCMRM_6a.D	(01/27/17 00:00:00)	QC_batch-exp1-colon_6a	gccolon1	51
QC_exp1-colon_5c	-	(NA NA)	-	-	-	QC_batch-exp1-colon_PA_5c.d	(04/12/17 00:00:00)	QC_batch-exp1-colon_PA_5c	pacolon1	29	QC_batch-exp1-colon_BA_5c.d	(01/18/17 00:00:00)	QC_batch-exp1-colon_BA_5c	bacolon1	110	QC_batch-exp1-colon_GCMRM_5c.D	(01/27/17 00:00:00)	QC_batch-exp1-colon_5c	gccolon1	26
QC_batch-exp2-colon_5i	QC_batch-exp2-colon_SF_5i.d	(02/17/17 00:00:00)	QC_batch-exp2-colon_SF_5i	sfcolon2	62	-	(NA NA)	-	-	-	-	(NA NA)	-	-	-	-	(NA NA)	-	-	-
QC_exp1-colon_6b	-	(NA NA)	-	-	-	-	(NA NA)	-	-	-	-	(NA NA)	-	-	-	QC_batch-exp1-colon_GCMRM_6b.D	(01/27/17 00:00:00)	QC_batch-exp1-colon_6b	gccolon1	64
QC_exp1-colon_5d	-	(NA NA)	-	-	-	QC_batch-exp1-colon_PA_5d.d	(04/12/17 00:00:00)	QC_batch-exp1-colon_PA_5d	pacolon1	42	QC_batch-exp1-colon_BA_5d.d	(01/18/17 00:00:00)	QC_batch-exp1-colon_BA_5d	bacolon1	123	QC_batch-exp1-colon_GCMRM_5d.D	(01/27/17 00:00:00)	QC_batch-exp1-colon_5d	gccolon1	39
QC_batch-exp2-colon_5j	QC_batch-exp2-colon_SF_5j.d	(02/17/17 00:00:00)	QC_batch-exp2-colon_SF_5j	sfcolon2	75	-	(NA NA)	-	-	-	-	(NA NA)	-	-	-	-	(NA NA)	-	-	-
QC_exp1-colon_6c	-	(NA NA)	-	-	-	-	(NA NA)	-	-	-	-	(NA NA)	-	-	-	QC_batch-exp1-colon_GCMRM_6c.D	(01/27/17 00:00:00)	QC_batch-exp1-colon_6c	gccolon1	76
QC_exp123-colon_post.bacolon3	-	(NA NA)	-	-	-	-	(NA NA)	-	-	-	QC_batch-exp123-colon_BA_6b.d	(01/15/17 00:00:00)	QC_batch-exp123-colon_BA_6b	bacolon3	77	-	(NA NA)	-	-	-
QC-exp1-colon_5a	QC_batch-exp1-colon_SF_5a.d	(02/20/17 00:00:00)	QC_batch-exp1-colon_SF_5a	sfcolon1	80	-	(NA NA)	-	-	-	-	(NA NA)	-	-	-	-	(NA NA)	-	-	-
QC_exp123-colon_pre.bacolon1	-	(NA NA)	-	-	-	-	(NA NA)	-	-	-	QC_batch-exp123-colon_BA_6a.d	(01/18/17 00:00:00)	QC_batch-exp123-colon_BA_6a	bacolon1	84	-	(NA NA)	-	-	-
QC-exp1-colon_5b	QC_batch-exp1-colon_SF_5b.d	(02/20/17 00:00:00)	QC_batch-exp1-colon_SF_5b	sfcolon1	92	-	(NA NA)	-	-	-	-	(NA NA)	-	-	-	-	(NA NA)	-	-	-
QC_exp1-colon_6d	-	(NA NA)	-	-	-	-	(NA NA)	-	-	-	-	(NA NA)	-	-	-	QC_batch-exp1-colon_GCMRM_6d.D	(01/27/17 00:00:00)	QC_batch-exp1-colon_6d	gccolon1	93
QC_exp123-exp1-colon_6b	-	(NA NA)	-	-	-	QC_batch-exp123-exp1-colon_PA_6b.d	(04/12/17 00:00:00)	QC_batch-exp123-exp1-colon_PA_6b	pacolon1	94	-	(NA NA)	-	-	-	-	(NA NA)	-	-	-
QC_exp1-colon_5e	-	(NA NA)	-	-	-	QC_batch-exp1-colon_PA_5e.d	(04/12/17 00:00:00)	QC_batch-exp1-colon_PA_5e	pacolon1	55	QC_batch-exp1-colon_BA_5e.d	(01/18/17 00:00:00)	QC_batch-exp1-colon_BA_5e	bacolon1	136	QC_batch-exp1-colon_GCMRM_5e.D	(01/27/17 00:00:00)	QC_batch-exp1-colon_5e	gccolon1	94
QC-exp1-colon_5c	QC_batch-exp1-colon_SF_5c.d	(02/20/17 00:00:00)	QC_batch-exp1-colon_SF_5c	sfcolon1	105	-	(NA NA)	-	-	-	-	(NA NA)	-	-	-	-	(NA NA)	-	-	-
QC_exp1-colon_5f	-	(NA NA)	-	-	-	QC_batch-exp1-colon_PA_5f.d	(04/12/17 00:00:00)	QC_batch-exp1-colon_PA_5f	pacolon1	68	QC_batch-exp1-colon_BA_5f.d	(01/18/17 00:00:00)	QC_batch-exp1-colon_BA_5f	bacolon1	149	-	(NA NA)	-	-	-
QC-exp1-colon_5d	QC_batch-exp1-colon_SF_5d.d	(02/20/17 00:00:00)	QC_batch-exp1-colon_SF_5d	sfcolon1	118	-	(NA NA)	-	-	-	-	(NA NA)	-	-	-	-	(NA NA)	-	-	-
QC_exp3-colon_5a	-	(NA NA)	-	-	-	QC_batch-exp3-colon_PA_5a.d	(04/15/17 00:00:00)	QC_batch-exp3-colon_PA_5a	pacolon3	176	QC_batch-exp3-colon_BA_5a.d	(01/15/17 00:00:00)	QC_batch-exp3-colon_BA_5a	bacolon3	5	QC_batch-exp3-colon_GCMRM_5a.D	(02/08/17 00:00:00)	QC_batch-exp3-colon_5a	gccolon3	176
QC_exp1-colon_5g	-	(NA NA)	-	-	-	QC_batch-exp1-colon_PA_5g.d	(04/12/17 00:00:00)	QC_batch-exp1-colon_PA_5g	pacolon1	80	QC_batch-exp1-colon_BA_5g.d	(01/18/17 00:00:00)	QC_batch-exp1-colon_BA_5g	bacolon1	161	-	(NA NA)	-	-	-
QC_exp3-colon_5d	-	(NA NA)	-	-	-	QC_batch-exp3-colon_PA_5d.d	(04/15/17 00:00:00)	QC_batch-exp3-colon_PA_5d	pacolon3	211	QC_batch-exp3-colon_BA_5d.d	(01/15/17 00:00:00)	QC_batch-exp3-colon_BA_5d	bacolon3	40	-	(NA NA)	-	-	-
QC_exp2-colon_5a	-	(NA NA)	-	-	-	QC_batch-exp2-colon_PA_5a.d	(04/12/17 00:00:00)	QC_batch-exp2-colon_PA_5a	pacolon2	99	QC_batch-exp2-colon_BA_5a.d	(01/18/17 00:00:00)	QC_batch-exp2-colon_BA_5a	bacolon2	185	QC_batch-exp2-colon_GCMRM_5a.D	(02/02/17 00:00:00)	QC_batch-exp2-colon_5a	gccolon2	99
QC_exp3-colon_5b	-	(NA NA)	-	-	-	QC_batch-exp3-colon_PA_5b.d	(04/15/17 00:00:00)	QC_batch-exp3-colon_PA_5b	pacolon3	187	QC_batch-exp3-colon_BA_5b.d	(01/15/17 00:00:00)	QC_batch-exp3-colon_BA_5b	bacolon3	16	QC_batch-exp3-colon_GCMRM_5b.D	(02/08/17 00:00:00)	QC_batch-exp3-colon_5b	gccolon3	187
QC-exp1-colon_5e	QC_batch-exp1-colon_SF_5e.d	(02/20/17 00:00:00)	QC_batch-exp1-colon_SF_5e	sfcolon1	131	-	(NA NA)	-	-	-	-	(NA NA)	-	-	-	-	(NA NA)	-	-	-
QC_exp2-colon_6a	-	(NA NA)	-	-	-	-	(NA NA)	-	-	-	-	(NA NA)	-	-	-	QC_batch-exp2-colon_GCMRM_6a.D	(02/02/17 00:00:00)	QC_batch-exp2-colon_6a	gccolon2	132
QC_exp1-colon_5h	-	(NA NA)	-	-	-	QC_batch-exp1-colon_PA_5h.d	(04/12/17 00:00:00)	QC_batch-exp1-colon_PA_5h	pacolon1	93	QC_batch-exp1-colon_BA_5h.d	(01/18/17 00:00:00)	QC_batch-exp1-colon_BA_5h	bacolon1	175	-	(NA NA)	-	-	-
QC_exp3-colon_5e	-	(NA NA)	-	-	-	QC_batch-exp3-colon_PA_5e.d	(04/15/17 00:00:00)	QC_batch-exp3-colon_PA_5e	pacolon3	223	QC_batch-exp3-colon_BA_5e.d	(01/15/17 00:00:00)	QC_batch-exp3-colon_BA_5e	bacolon3	52	-	(NA NA)	-	-	-
QC_exp2-colon_5b	-	(NA NA)	-	-	-	QC_batch-exp2-colon_PA_5b.d	(04/12/17 00:00:00)	QC_batch-exp2-colon_PA_5b	pacolon2	111	QC_batch-exp2-colon_BA_5b.d	(01/18/17 00:00:00)	QC_batch-exp2-colon_BA_5b	bacolon2	197	QC_batch-exp2-colon_GCMRM_5b.D	(02/02/17 00:00:00)	QC_batch-exp2-colon_5b	gccolon2	111
QC_exp3-colon_5c	-	(NA NA)	-	-	-	QC_batch-exp3-colon_PA_5c.d	(04/15/17 00:00:00)	QC_batch-exp3-colon_PA_5c	pacolon3	199	QC_batch-exp3-colon_BA_5c.d	(01/15/17 00:00:00)	QC_batch-exp3-colon_BA_5c	bacolon3	28	QC_batch-exp3-colon_GCMRM_5c.D	(02/08/17 00:00:00)	QC_batch-exp3-colon_5c	gccolon3	199
QC_exp2-colon_6b	-	(NA NA)	-	-	-	-	(NA NA)	-	-	-	-	(NA NA)	-	-	-	QC_batch-exp2-colon_GCMRM_6b.D	(02/02/17 00:00:00)	QC_batch-exp2-colon_6b	gccolon2	143
QC-exp1-colon_5f	QC_batch-exp1-colon_SF_5f.d	(02/23/17 00:00:00)	QC_batch-exp1-colon_SF_5f	sfcolon1	144	-	(NA NA)	-	-	-	-	(NA NA)	-	-	-	-	(NA NA)	-	-	-
QC_exp3-colon_5f	-	(NA NA)	-	-	-	QC_batch-exp3-colon_PA_5f.d	(04/15/17 00:00:00)	QC_batch-exp3-colon_PA_5f	pacolon3	235	QC_batch-exp3-colon_BA_5f.d	(01/15/17 00:00:00)	QC_batch-exp3-colon_BA_5f	bacolon3	64	-	(NA NA)	-	-	-
QC_exp2-colon_5c	-	(NA NA)	-	-	-	QC_batch-exp2-colon_PA_5c.d	(04/12/17 00:00:00)	QC_batch-exp2-colon_PA_5c	pacolon2	122	QC_batch-exp2-colon_BA_5c.d	(01/18/17 00:00:00)	QC_batch-exp2-colon_BA_5c	bacolon2	208	QC_batch-exp2-colon_GCMRM_5c.D	(02/02/17 00:00:00)	QC_batch-exp2-colon_5c	gccolon2	122
QC-exp1-colon_5g	QC_batch-exp1-colon_SF_5g.d	(02/23/17 00:00:00)	QC_batch-exp1-colon_SF_5g	sfcolon1	156	-	(NA NA)	-	-	-	-	(NA NA)	-	-	-	-	(NA NA)	-	-	-
QC_exp2-colon_6c	-	(NA NA)	-	-	-	-	(NA NA)	-	-	-	-	(NA NA)	-	-	-	QC_batch-exp2-colon_GCMRM_6c.D	(02/02/17 00:00:00)	QC_batch-exp2-colon_6c	gccolon2	156
QC_exp3-colon_5g	-	(NA NA)	-	-	-	QC_batch-exp3-colon_PA_5g.d	(04/15/17 00:00:00)	QC_batch-exp3-colon_PA_5g	pacolon3	247	QC_batch-exp3-colon_BA_5g.d	(01/15/17 00:00:00)	QC_batch-exp3-colon_BA_5g	bacolon3	76	-	(NA NA)	-	-	-
QC-exp1-colon_5h	QC_batch-exp1-colon_SF_5h.d	(02/23/17 00:00:00)	QC_batch-exp1-colon_SF_5h	sfcolon1	170	-	(NA NA)	-	-	-	-	(NA NA)	-	-	-	-	(NA NA)	-	-	-
QC_exp2-colon_6d	-	(NA NA)	-	-	-	-	(NA NA)	-	-	-	-	(NA NA)	-	-	-	QC_batch-exp2-colon_GCMRM_6d.D	(02/05/17 00:00:00)	QC_batch-exp2-colon_6d	gccolon2	171
QC-exp3-colon_5a	QC_batch-exp3-colon_SF_5a.d	(02/23/17 00:00:00)	QC_batch-exp3-colon_SF_5a	sfcolon3	175	-	(NA NA)	-	-	-	-	(NA NA)	-	-	-	-	(NA NA)	-	-	-
QC_exp2-colon_5d	-	(NA NA)	-	-	-	QC_batch-exp2-colon_PA_5d.d	(04/12/17 00:00:00)	QC_batch-exp2-colon_PA_5d	pacolon2	132	QC_batch-exp2-colon_BA_5d.d	(01/18/17 00:00:00)	QC_batch-exp2-colon_BA_5d	bacolon2	218	-	(NA NA)	-	-	-
QC_exp123-colon_post.bacolon1	-	(NA NA)	-	-	-	-	(NA NA)	-	-	-	QC_batch-exp123-colon_BA_6b.d	(01/18/17 00:00:00)	QC_batch-exp123-colon_BA_6b	bacolon1	176	-	(NA NA)	-	-	-
QC_exp1-colon_5hb	-	(NA NA)	-	-	-	-	(NA NA)	-	-	-	QC_batch-exp1-colon_BA_5hb.d	(01/18/17 00:00:00)	QC_batch-exp1-colon_BA_5hb	bacolon1	180	-	(NA NA)	-	-	-
QC_exp123-colon_pre.bacolon2	-	(NA NA)	-	-	-	-	(NA NA)	-	-	-	QC_batch-exp123-colon_BA_6a.d	(01/18/17 00:00:00)	QC_batch-exp123-colon_BA_6a	bacolon2	184	-	(NA NA)	-	-	-
QC-exp3-colon_5b	QC_batch-exp3-colon_SF_5b.d	(02/23/17 00:00:00)	QC_batch-exp3-colon_SF_5b	sfcolon3	185	-	(NA NA)	-	-	-	-	(NA NA)	-	-	-	-	(NA NA)	-	-	-
QC_exp2-colon_5e	-	(NA NA)	-	-	-	QC_batch-exp2-colon_PA_5e.d	(04/12/17 00:00:00)	QC_batch-exp2-colon_PA_5e	pacolon2	143	QC_batch-exp2-colon_BA_5e.d	(01/18/17 00:00:00)	QC_batch-exp2-colon_BA_5e	bacolon2	229	-	(NA NA)	-	-	-
QC-exp3-colon_5c	QC_batch-exp3-colon_SF_5c.d	(02/23/17 00:00:00)	QC_batch-exp3-colon_SF_5c	sfcolon3	197	-	(NA NA)	-	-	-	-	(NA NA)	-	-	-	-	(NA NA)	-	-	-
QC_exp2-colon_5f	-	(NA NA)	-	-	-	QC_batch-exp2-colon_PA_5f.d	(04/12/17 00:00:00)	QC_batch-exp2-colon_PA_5f	pacolon2	156	QC_batch-exp2-colon_BA_5f.d	(01/18/17 00:00:00)	QC_batch-exp2-colon_BA_5f	bacolon2	242	-	(NA NA)	-	-	-
QC-exp3-colon_5d	QC_batch-exp3-colon_SF_5d.d	(02/23/17 00:00:00)	QC_batch-exp3-colon_SF_5d	sfcolon3	209	-	(NA NA)	-	-	-	-	(NA NA)	-	-	-	-	(NA NA)	-	-	-
QC_exp3-colon_6a	-	(NA NA)	-	-	-	-	(NA NA)	-	-	-	-	(NA NA)	-	-	-	QC_batch-exp3-colon_GCMRM_6a.D	(02/08/17 00:00:00)	QC_batch-exp3-colon_6a	gccolon3	211
QC_exp2-colon_5g	-	(NA NA)	-	-	-	QC_batch-exp2-colon_PA_5g.d	(04/12/17 00:00:00)	QC_batch-exp2-colon_PA_5g	pacolon2	171	QC_batch-exp2-colon_BA_5g.d	(01/18/17 00:00:00)	QC_batch-exp2-colon_BA_5g	bacolon2	257	-	(NA NA)	-	-	-
QC-exp3-colon_5e	QC_batch-exp3-colon_SF_5e.d	(02/23/17 00:00:00)	QC_batch-exp3-colon_SF_5e	sfcolon3	221	-	(NA NA)	-	-	-	-	(NA NA)	-	-	-	-	(NA NA)	-	-	-
QC_exp3-colon_6b	-	(NA NA)	-	-	-	-	(NA NA)	-	-	-	-	(NA NA)	-	-	-	QC_batch-exp3-colon_GCMRM_6b.D	(02/08/17 00:00:00)	QC_batch-exp3-colon_6b	gccolon3	221
QC_exp3-colon_6c	-	(NA NA)	-	-	-	-	(NA NA)	-	-	-	-	(NA NA)	-	-	-	QC_batch-exp3-colon_GCMRM_6c.D	(02/08/17 00:00:00)	QC_batch-exp3-colon_6c	gccolon3	232
QC-exp3-colon_5f	QC_batch-exp3-colon_SF_5f.d	(02/23/17 00:00:00)	QC_batch-exp3-colon_SF_5f	sfcolon3	233	-	(NA NA)	-	-	-	-	(NA NA)	-	-	-	-	(NA NA)	-	-	-
QC-exp3-colon_5g	QC_batch-exp3-colon_SF_5g.d	(02/23/17 00:00:00)	QC_batch-exp3-colon_SF_5g	sfcolon3	246	-	(NA NA)	-	-	-	-	(NA NA)	-	-	-	-	(NA NA)	-	-	-
QC_exp3-colon_6d	-	(NA NA)	-	-	-	-	(NA NA)	-	-	-	-	(NA NA)	-	-	-	QC_batch-exp3-colon_GCMRM_6d.D	(02/11/17 00:00:00)	QC_batch-exp3-colon_6d	gccolon3	247
QC_exp123-colon_post.bacolon2	-	(NA NA)	-	-	-	-	(NA NA)	-	-	-	QC_batch-exp123-colon_BA_6b.d	(01/18/17 00:00:00)	QC_batch-exp123-colon_BA_6b	bacolon2	258	-	(NA NA)	-	-	-
ATB-j7-exp1-colon_291	Sa_ATB-M3-j7-exp1-colon_SF_291.d	(02/20/17 00:00:00)	Sa_ATB-M3-j7-exp1-colon_SF_291	sfcolon1	82	Sa_ATB-M3-j7-exp1-colon_PA_291.d	(04/12/17 00:00:00)	Sa_ATB-M3-j7-exp1-colon_PA_291	pacolon1	5	Sa_ATB-M3-j7-exp1-colon_BA_291.d	(01/18/17 00:00:00)	Sa_ATB-M3-j7-exp1-colon_BA_291	bacolon1	86	Sa_ATB-M3-j7-exp1-colon_GCMRM_291.D	(01/27/17 00:00:00)	Sa_ATB-M3-j7-exp1-colon_291	gccolon1	5
HIRAE-j14-exp1-colon_323	Sa_HIRAE-M5-j14-exp1-colon_SF_323.d	(02/20/17 00:00:00)	Sa_HIRAE-M5-j14-exp1-colon_SF_323	sfcolon1	83	Sa_HIRAE-M5-j14-exp1-colon_PA_323.d	(04/12/17 00:00:00)	Sa_HIRAE-M5-j14-exp1-colon_PA_323	pacolon1	6	Sa_HIRAE-M5-j14-exp1-colon_BA_323.d	(01/18/17 00:00:00)	Sa_HIRAE-M5-j14-exp1-colon_BA_323	bacolon1	87	Sa_HIRAE-M5-j14-exp1-colon_GCMRM_323.D	(01/27/17 00:00:00)	Sa_HIRAE-M5-j14-exp1-colon_323	gccolon1	6
Nacl-j7-exp1-colon_283	Sa_Nacl-M1-j7-exp1-colon_SF_283.d	(02/20/17 00:00:00)	Sa_Nacl-M1-j7-exp1-colon_SF_283	sfcolon1	84	Sa_Nacl-M1-j7-exp1-colon_PA_283.d	(04/12/17 00:00:00)	Sa_Nacl-M1-j7-exp1-colon_PA_283	pacolon1	7	Sa_Nacl-M1-j7-exp1-colon_BA_283.d	(01/18/17 00:00:00)	Sa_Nacl-M1-j7-exp1-colon_BA_283	bacolon1	88	Sa_Nacl-M1-j7-exp1-colon_GCMRM_283.D	(01/27/17 00:00:00)	Sa_Nacl-M1-j7-exp1-colon_283	gccolon1	7
FRAGILIS-j7-exp1-colon_305	Sa_FRAGILIS-M5-j7-exp1-colon_SF_305.d	(02/20/17 00:00:00)	Sa_FRAGILIS-M5-j7-exp1-colon_SF_305	sfcolon1	85	Sa_FRAGILIS-M5-j7-exp1-colon_PA_305.d	(04/12/17 00:00:00)	Sa_FRAGILIS-M5-j7-exp1-colon_PA_305	pacolon1	8	Sa_FRAGILIS-M5-j7-exp1-colon_BA_305.d	(01/18/17 00:00:00)	Sa_FRAGILIS-M5-j7-exp1-colon_BA_305	bacolon1	89	Sa_FRAGILIS-M5-j7-exp1-colon_GCMRM_305.D	(01/27/17 00:00:00)	Sa_FRAGILIS-M5-j7-exp1-colon_305	gccolon1	8
FRAGILIS-j7-exp1-colon_301	Sa_FRAGILIS-M1-j7-exp1-colon_SF_301.d	(02/20/17 00:00:00)	Sa_FRAGILIS-M1-j7-exp1-colon_SF_301	sfcolon1	87	Sa_FRAGILIS-M1-j7-exp1-colon_PA_301.d	(04/12/17 00:00:00)	Sa_FRAGILIS-M1-j7-exp1-colon_PA_301	pacolon1	11	Sa_FRAGILIS-M1-j7-exp1-colon_BA_301.d	(01/18/17 00:00:00)	Sa_FRAGILIS-M1-j7-exp1-colon_BA_301	bacolon1	92	Sa_FRAGILIS-M1-j7-exp1-colon_GCMRM_301.D	(01/27/17 00:00:00)	Sa_FRAGILIS-M1-j7-exp1-colon_301	gccolon1	10
ATB-j3-exp1-colon_259	Sa_ATB-M1-j3-exp1-colon_SF_259.d	(02/20/17 00:00:00)	Sa_ATB-M1-j3-exp1-colon_SF_259	sfcolon1	89	Sa_ATB-M1-j3-exp1-colon_PA_259.d	(04/12/17 00:00:00)	Sa_ATB-M1-j3-exp1-colon_PA_259	pacolon1	13	Sa_ATB-M1-j3-exp1-colon_BA_259.d	(01/18/17 00:00:00)	Sa_ATB-M1-j3-exp1-colon_BA_259	bacolon1	94	Sa_ATB-M1-j3-exp1-colon_GCMRM_259.D	(01/27/17 00:00:00)	Sa_ATB-M1-j3-exp1-colon_259	gccolon1	11
ATB-j3-exp1-colon_263	Sa_ATB-M5-j3-exp1-colon_SF_263.d	(02/20/17 00:00:00)	Sa_ATB-M5-j3-exp1-colon_SF_263	sfcolon1	90	Sa_ATB-M5-j3-exp1-colon_PA_263.d	(04/12/17 00:00:00)	Sa_ATB-M5-j3-exp1-colon_PA_263	pacolon1	14	Sa_ATB-M5-j3-exp1-colon_BA_263.d	(01/18/17 00:00:00)	Sa_ATB-M5-j3-exp1-colon_BA_263	bacolon1	95	Sa_ATB-M5-j3-exp1-colon_GCMRM_263.D	(01/27/17 00:00:00)	Sa_ATB-M5-j3-exp1-colon_263	gccolon1	12
ATB-j7-exp1-colon_293	Sa_ATB-M5-j7-exp1-colon_SF_293.d	(02/20/17 00:00:00)	Sa_ATB-M5-j7-exp1-colon_SF_293	sfcolon1	91	Sa_ATB-M5-j7-exp1-colon_PA_293.d	(04/12/17 00:00:00)	Sa_ATB-M5-j7-exp1-colon_PA_293	pacolon1	15	Sa_ATB-M5-j7-exp1-colon_BA_293.d	(01/18/17 00:00:00)	Sa_ATB-M5-j7-exp1-colon_BA_293	bacolon1	96	Sa_ATB-M5-j7-exp1-colon_GCMRM_293.D	(01/27/17 00:00:00)	Sa_ATB-M5-j7-exp1-colon_293	gccolon1	13
BARNECIELA-j3-exp1-colon_277	Sa_BARNECIELA-M1-j3-exp1-colon_SF_277.d	(02/20/17 00:00:00)	Sa_BARNECIELA-M1-j3-exp1-colon_SF_277	sfcolon1	93	Sa_BARNECIELA-M1-j3-exp1-colon_PA_277.d	(04/12/17 00:00:00)	Sa_BARNECIELA-M1-j3-exp1-colon_PA_277	pacolon1	17	Sa_BARNECIELA-M1-j3-exp1-colon_BA_277.d	(01/18/17 00:00:00)	Sa_BARNECIELA-M1-j3-exp1-colon_BA_277	bacolon1	98	Sa_BARNECIELA-M1-j3-exp1-colon_GCMRM_277.D	(01/27/17 00:00:00)	Sa_BARNECIELA-M1-j3-exp1-colon_277	gccolon1	15
HIRAE-j3-exp1-colon_269	Sa_HIRAE-M5-j3-exp1-colon_SF_269.d	(02/20/17 00:00:00)	Sa_HIRAE-M5-j3-exp1-colon_SF_269	sfcolon1	94	Sa_HIRAE-M5-j3-exp1-colon_PA_269.d	(04/12/17 00:00:00)	Sa_HIRAE-M5-j3-exp1-colon_PA_269	pacolon1	18	Sa_HIRAE-M5-j3-exp1-colon_BA_269.d	(01/18/17 00:00:00)	Sa_HIRAE-M5-j3-exp1-colon_BA_269	bacolon1	99	Sa_HIRAE-M5-j3-exp1-colon_GCMRM_269.D	(01/27/17 00:00:00)	Sa_HIRAE-M5-j3-exp1-colon_269	gccolon1	16
ATB-j14-exp1-colon_314	Sa_ATB-M2-j14-exp1-colon_SF_314.d	(02/20/17 00:00:00)	Sa_ATB-M2-j14-exp1-colon_SF_314	sfcolon1	95	Sa_ATB-M2-j14-exp1-colon_PA_314.d	(04/12/17 00:00:00)	Sa_ATB-M2-j14-exp1-colon_PA_314	pacolon1	19	Sa_ATB-M2-j14-exp1-colon_BA_314.d	(01/18/17 00:00:00)	Sa_ATB-M2-j14-exp1-colon_BA_314	bacolon1	100	Sa_ATB-M2-j14-exp1-colon_GCMRM_314.D	(01/27/17 00:00:00)	Sa_ATB-M2-j14-exp1-colon_314	gccolon1	17
BARNECIELA-j3-exp1-colon_279	Sa_BARNECIELA-M3-j3-exp1-colon_SF_279.d	(02/20/17 00:00:00)	Sa_BARNECIELA-M3-j3-exp1-colon_SF_279	sfcolon1	96	Sa_BARNECIELA-M3-j3-exp1-colon_PA_279.d	(04/12/17 00:00:00)	Sa_BARNECIELA-M3-j3-exp1-colon_PA_279	pacolon1	20	Sa_BARNECIELA-M3-j3-exp1-colon_BA_279.d	(01/18/17 00:00:00)	Sa_BARNECIELA-M3-j3-exp1-colon_BA_279	bacolon1	101	Sa_BARNECIELA-M3-j3-exp1-colon_GCMRM_279.D	(01/27/17 00:00:00)	Sa_BARNECIELA-M3-j3-exp1-colon_279	gccolon1	18
BARNECIELA-j7-exp1-colon_309	Sa_BARNECIELA-M3-j7-exp1-colon_SF_309.d	(02/20/17 00:00:00)	Sa_BARNECIELA-M3-j7-exp1-colon_SF_309	sfcolon1	97	Sa_BARNECIELA-M3-j7-exp1-colon_PA_309.d	(04/12/17 00:00:00)	Sa_BARNECIELA-M3-j7-exp1-colon_PA_309	pacolon1	21	Sa_BARNECIELA-M3-j7-exp1-colon_BA_309.d	(01/18/17 00:00:00)	Sa_BARNECIELA-M3-j7-exp1-colon_BA_309	bacolon1	102	Sa_BARNECIELA-M3-j7-exp1-colon_GCMRM_309.D	(01/27/17 00:00:00)	Sa_BARNECIELA-M3-j7-exp1-colon_309	gccolon1	19
HIRAE-j7-exp1-colon_297	Sa_HIRAE-M3-j7-exp1-colon_SF_297.d	(02/20/17 00:00:00)	Sa_HIRAE-M3-j7-exp1-colon_SF_297	sfcolon1	98	Sa_HIRAE-M3-j7-exp1-colon_PA_297.d	(04/12/17 00:00:00)	Sa_HIRAE-M3-j7-exp1-colon_PA_297	pacolon1	22	Sa_HIRAE-M3-j7-exp1-colon_BA_297.d	(01/18/17 00:00:00)	Sa_HIRAE-M3-j7-exp1-colon_BA_297	bacolon1	103	Sa_HIRAE-M3-j7-exp1-colon_GCMRM_297.D	(01/27/17 00:00:00)	Sa_HIRAE-M3-j7-exp1-colon_297	gccolon1	20
FRAGILIS-j14-exp1-colon_327	Sa_FRAGILIS-M3-j14-exp1-colon_SF_327.d	(02/20/17 00:00:00)	Sa_FRAGILIS-M3-j14-exp1-colon_SF_327	sfcolon1	99	Sa_FRAGILIS-M3-j14-exp1-colon_PA_327.d	(04/12/17 00:00:00)	Sa_FRAGILIS-M3-j14-exp1-colon_PA_327	pacolon1	23	Sa_FRAGILIS-M3-j14-exp1-colon_BA_327.d	(01/18/17 00:00:00)	Sa_FRAGILIS-M3-j14-exp1-colon_BA_327	bacolon1	104	Sa_FRAGILIS-M3-j14-exp1-colon_GCMRM_327.D	(01/27/17 00:00:00)	Sa_FRAGILIS-M3-j14-exp1-colon_327	gccolon1	21
Nacl-j7-exp1-colon_287	Sa_Nacl-M5-j7-exp1-colon_SF_287.d	(02/20/17 00:00:00)	Sa_Nacl-M5-j7-exp1-colon_SF_287	sfcolon1	100	Sa_Nacl-M5-j7-exp1-colon_PA_287.d	(04/12/17 00:00:00)	Sa_Nacl-M5-j7-exp1-colon_PA_287	pacolon1	24	Sa_Nacl-M5-j7-exp1-colon_BA_287.d	(01/18/17 00:00:00)	Sa_Nacl-M5-j7-exp1-colon_BA_287	bacolon1	105	Sa_Nacl-M5-j7-exp1-colon_GCMRM_287.D	(01/27/17 00:00:00)	Sa_Nacl-M5-j7-exp1-colon_287	gccolon1	22
HIRAE-j7-exp1-colon_299	Sa_HIRAE-M5-j7-exp1-colon_SF_299.d	(02/20/17 00:00:00)	Sa_HIRAE-M5-j7-exp1-colon_SF_299	sfcolon1	101	Sa_HIRAE-M5-j7-exp1-colon_PA_299.d	(04/12/17 00:00:00)	Sa_HIRAE-M5-j7-exp1-colon_PA_299	pacolon1	25	Sa_HIRAE-M5-j7-exp1-colon_BA_299.d	(01/18/17 00:00:00)	Sa_HIRAE-M5-j7-exp1-colon_BA_299	bacolon1	106	Sa_HIRAE-M5-j7-exp1-colon_GCMRM_299.D	(01/27/17 00:00:00)	Sa_HIRAE-M5-j7-exp1-colon_299	gccolon1	23
HIRAE-j14-exp1-colon_319	Sa_HIRAE-M1-j14-exp1-colon_SF_319.d	(02/20/17 00:00:00)	Sa_HIRAE-M1-j14-exp1-colon_SF_319	sfcolon1	81	Sa_HIRAE-M1-j14-exp1-colon_PA_319.d	(04/12/17 00:00:00)	Sa_HIRAE-M1-j14-exp1-colon_PA_319	pacolon1	4	Sa_HIRAE-M1-j14-exp1-colon_BA_319b.d	(01/18/17 00:00:00)	Sa_HIRAE-M1-j14-exp1-colon_BA_319b	bacolon1	173	Sa_HIRAE-M1-j14-exp1-colon_GCMRM_319.D	(01/27/17 00:00:00)	Sa_HIRAE-M1-j14-exp1-colon_319	gccolon1	4
Nacl-j3-exp1-colon_253	Sa_Nacl-M1-j3-exp1-colon_SF_253.d	(02/20/17 00:00:00)	Sa_Nacl-M1-j3-exp1-colon_SF_253	sfcolon1	103	Sa_Nacl-M1-j3-exp1-colon_PA_253.d	(04/12/17 00:00:00)	Sa_Nacl-M1-j3-exp1-colon_PA_253	pacolon1	27	Sa_Nacl-M1-j3-exp1-colon_BA_253.d	(01/18/17 00:00:00)	Sa_Nacl-M1-j3-exp1-colon_BA_253	bacolon1	108	Sa_Nacl-M1-j3-exp1-colon_GCMRM_253.D	(01/27/17 00:00:00)	Sa_Nacl-M1-j3-exp1-colon_253	gccolon1	24
HIRAE-j3-exp1-colon_267	Sa_HIRAE-M3-j3-exp1-colon_SF_267.d	(02/20/17 00:00:00)	Sa_HIRAE-M3-j3-exp1-colon_SF_267	sfcolon1	104	Sa_HIRAE-M3-j3-exp1-colon_PA_267.d	(04/12/17 00:00:00)	Sa_HIRAE-M3-j3-exp1-colon_PA_267	pacolon1	28	Sa_HIRAE-M3-j3-exp1-colon_BA_267.d	(01/18/17 00:00:00)	Sa_HIRAE-M3-j3-exp1-colon_BA_267	bacolon1	109	Sa_HIRAE-M3-j3-exp1-colon_GCMRM_267.D	(01/27/17 00:00:00)	Sa_HIRAE-M3-j3-exp1-colon_267	gccolon1	25
BARNECIELA-j14-exp1-colon_336	Sa_BARNECIELA-M6-j14-exp1-colon_SF_336.d	(02/20/17 00:00:00)	Sa_BARNECIELA-M6-j14-exp1-colon_SF_336	sfcolon1	86	Sa_BARNECIELA-M6-j14-exp1-colon_PA_336.d	(04/12/17 00:00:00)	Sa_BARNECIELA-M6-j14-exp1-colon_PA_336	pacolon1	9	Sa_BARNECIELA-M6-j14-exp1-colon_BA_336.d	(01/18/17 00:00:00)	Sa_BARNECIELA-M6-j14-exp1-colon_BA_336	bacolon1	90	Sa_BARNECIELA-M6-j14-exp1-colon_GCMRM_336b.D	(01/27/17 00:00:00)	Sa_BARNECIELA-M6-j14-exp1-colon_336b	gccolon1	89
FRAGILIS-j14-exp1-colon_328	Sa_FRAGILIS-M4-j14-exp1-colon_SF_328.d	(02/20/17 00:00:00)	Sa_FRAGILIS-M4-j14-exp1-colon_SF_328	sfcolon1	106	Sa_FRAGILIS-M4-j14-exp1-colon_PA_328.d	(04/12/17 00:00:00)	Sa_FRAGILIS-M4-j14-exp1-colon_PA_328	pacolon1	30	Sa_FRAGILIS-M4-j14-exp1-colon_BA_328.d	(01/18/17 00:00:00)	Sa_FRAGILIS-M4-j14-exp1-colon_BA_328	bacolon1	111	Sa_FRAGILIS-M4-j14-exp1-colon_GCMRM_328.D	(01/27/17 00:00:00)	Sa_FRAGILIS-M4-j14-exp1-colon_328	gccolon1	27
FRAGILIS-j7-exp1-colon_306	Sa_FRAGILIS-M6-j7-exp1-colon_SF_306.d	(02/20/17 00:00:00)	Sa_FRAGILIS-M6-j7-exp1-colon_SF_306	sfcolon1	107	Sa_FRAGILIS-M6-j7-exp1-colon_PA_306.d	(04/12/17 00:00:00)	Sa_FRAGILIS-M6-j7-exp1-colon_PA_306	pacolon1	31	Sa_FRAGILIS-M6-j7-exp1-colon_BA_306.d	(01/18/17 00:00:00)	Sa_FRAGILIS-M6-j7-exp1-colon_BA_306	bacolon1	112	Sa_FRAGILIS-M6-j7-exp1-colon_GCMRM_306.D	(01/27/17 00:00:00)	Sa_FRAGILIS-M6-j7-exp1-colon_306	gccolon1	28
ATB-j14-exp1-colon_316	Sa_ATB-M4-j14-exp1-colon_SF_316b.d	(02/23/17 00:00:00)	Sa_ATB-M4-j14-exp1-colon_SF_316b	sfcolon1	168	Sa_ATB-M4-j14-exp1-colon_PA_316.d	(04/12/17 00:00:00)	Sa_ATB-M4-j14-exp1-colon_PA_316	pacolon1	10	Sa_ATB-M4-j14-exp1-colon_BA_316.d	(01/18/17 00:00:00)	Sa_ATB-M4-j14-exp1-colon_BA_316	bacolon1	91	Sa_ATB-M4-j14-exp1-colon_GCMRM_316.D	(01/27/17 00:00:00)	Sa_ATB-M4-j14-exp1-colon_316	gccolon1	9
FRAGILIS-j3-exp1-colon_274	Sa_FRAGILIS-M4-j3-exp1-colon_SF_274.d	(02/20/17 00:00:00)	Sa_FRAGILIS-M4-j3-exp1-colon_SF_274	sfcolon1	108	Sa_FRAGILIS-M4-j3-exp1-colon_PA_274.d	(04/12/17 00:00:00)	Sa_FRAGILIS-M4-j3-exp1-colon_PA_274	pacolon1	32	Sa_FRAGILIS-M4-j3-exp1-colon_BA_274.d	(01/18/17 00:00:00)	Sa_FRAGILIS-M4-j3-exp1-colon_BA_274	bacolon1	113	Sa_FRAGILIS-M4-j3-exp1-colon_GCMRM_274.D	(01/27/17 00:00:00)	Sa_FRAGILIS-M4-j3-exp1-colon_274	gccolon1	29
BARNECIELA-j14-exp1-colon_331	Sa_BARNECIELA-M1-j14-exp1-colon_SF_331.d	(02/20/17 00:00:00)	Sa_BARNECIELA-M1-j14-exp1-colon_SF_331	sfcolon1	88	Sa_BARNECIELA-M1-j14-exp1-colon_PA_331.d	(04/12/17 00:00:00)	Sa_BARNECIELA-M1-j14-exp1-colon_PA_331	pacolon1	12	Sa_BARNECIELA-M1-j14-exp1-colon_BA_331.d	(01/18/17 00:00:00)	Sa_BARNECIELA-M1-j14-exp1-colon_BA_331	bacolon1	93	Sa_BARNECIELA-M1-j14-exp1-colon_GCMRM_331b.D	(01/27/17 00:00:00)	Sa_BARNECIELA-M1-j14-exp1-colon_331b	gccolon1	91
BARNECIELA-j7-exp1-colon_310	Sa_BARNECIELA-M4-j7-exp1-colon_SF_310.d	(02/20/17 00:00:00)	Sa_BARNECIELA-M4-j7-exp1-colon_SF_310	sfcolon1	109	Sa_BARNECIELA-M4-j7-exp1-colon_PA_310.d	(04/12/17 00:00:00)	Sa_BARNECIELA-M4-j7-exp1-colon_PA_310	pacolon1	33	Sa_BARNECIELA-M4-j7-exp1-colon_BA_310.d	(01/18/17 00:00:00)	Sa_BARNECIELA-M4-j7-exp1-colon_BA_310	bacolon1	114	Sa_BARNECIELA-M4-j7-exp1-colon_GCMRM_310.D	(01/27/17 00:00:00)	Sa_BARNECIELA-M4-j7-exp1-colon_310	gccolon1	30
Nacl-j3-exp1-colon_255	Sa_Nacl-M3-j3-exp1-colon_SF_255.d	(02/20/17 00:00:00)	Sa_Nacl-M3-j3-exp1-colon_SF_255	sfcolon1	110	Sa_Nacl-M3-j3-exp1-colon_PA_255.d	(04/12/17 00:00:00)	Sa_Nacl-M3-j3-exp1-colon_PA_255	pacolon1	34	Sa_Nacl-M3-j3-exp1-colon_BA_255.d	(01/18/17 00:00:00)	Sa_Nacl-M3-j3-exp1-colon_BA_255	bacolon1	115	Sa_Nacl-M3-j3-exp1-colon_GCMRM_255.D	(01/27/17 00:00:00)	Sa_Nacl-M3-j3-exp1-colon_255	gccolon1	31
ATB-j14-exp1-colon_317	Sa_ATB-M5-j14-exp1-colon_SF_317.d	(02/20/17 00:00:00)	Sa_ATB-M5-j14-exp1-colon_SF_317	sfcolon1	111	Sa_ATB-M5-j14-exp1-colon_PA_317.d	(04/12/17 00:00:00)	Sa_ATB-M5-j14-exp1-colon_PA_317	pacolon1	35	Sa_ATB-M5-j14-exp1-colon_BA_317.d	(01/18/17 00:00:00)	Sa_ATB-M5-j14-exp1-colon_BA_317	bacolon1	116	Sa_ATB-M5-j14-exp1-colon_GCMRM_317.D	(01/27/17 00:00:00)	Sa_ATB-M5-j14-exp1-colon_317	gccolon1	32
Nacl-j7-exp1-colon_285	Sa_Nacl-M3-j7-exp1-colon_SF_285.d	(02/20/17 00:00:00)	Sa_Nacl-M3-j7-exp1-colon_SF_285	sfcolon1	112	Sa_Nacl-M3-j7-exp1-colon_PA_285.d	(04/12/17 00:00:00)	Sa_Nacl-M3-j7-exp1-colon_PA_285	pacolon1	36	Sa_Nacl-M3-j7-exp1-colon_BA_285.d	(01/18/17 00:00:00)	Sa_Nacl-M3-j7-exp1-colon_BA_285	bacolon1	117	Sa_Nacl-M3-j7-exp1-colon_GCMRM_285.D	(01/27/17 00:00:00)	Sa_Nacl-M3-j7-exp1-colon_285	gccolon1	33
ATB-j3-exp1-colon_261	Sa_ATB-M3-j3-exp1-colon_SF_261.d	(02/20/17 00:00:00)	Sa_ATB-M3-j3-exp1-colon_SF_261	sfcolon1	113	Sa_ATB-M3-j3-exp1-colon_PA_261.d	(04/12/17 00:00:00)	Sa_ATB-M3-j3-exp1-colon_PA_261	pacolon1	37	Sa_ATB-M3-j3-exp1-colon_BA_261.d	(01/18/17 00:00:00)	Sa_ATB-M3-j3-exp1-colon_BA_261	bacolon1	118	Sa_ATB-M3-j3-exp1-colon_GCMRM_261.D	(01/27/17 00:00:00)	Sa_ATB-M3-j3-exp1-colon_261	gccolon1	34
HIRAE-j7-exp1-colon_295	Sa_HIRAE-M1-j7-exp1-colon_SF_295.d	(02/20/17 00:00:00)	Sa_HIRAE-M1-j7-exp1-colon_SF_295	sfcolon1	114	Sa_HIRAE-M1-j7-exp1-colon_PA_295.d	(04/12/17 00:00:00)	Sa_HIRAE-M1-j7-exp1-colon_PA_295	pacolon1	38	Sa_HIRAE-M1-j7-exp1-colon_BA_295.d	(01/18/17 00:00:00)	Sa_HIRAE-M1-j7-exp1-colon_BA_295	bacolon1	119	Sa_HIRAE-M1-j7-exp1-colon_GCMRM_295.D	(01/27/17 00:00:00)	Sa_HIRAE-M1-j7-exp1-colon_295	gccolon1	35
Nacl-j3-exp1-colon_257	Sa_Nacl-M5-j3-exp1-colon_SF_257.d	(02/20/17 00:00:00)	Sa_Nacl-M5-j3-exp1-colon_SF_257	sfcolon1	115	Sa_Nacl-M5-j3-exp1-colon_PA_257.d	(04/12/17 00:00:00)	Sa_Nacl-M5-j3-exp1-colon_PA_257	pacolon1	39	Sa_Nacl-M5-j3-exp1-colon_BA_257.d	(01/18/17 00:00:00)	Sa_Nacl-M5-j3-exp1-colon_BA_257	bacolon1	120	Sa_Nacl-M5-j3-exp1-colon_GCMRM_257.D	(01/27/17 00:00:00)	Sa_Nacl-M5-j3-exp1-colon_257	gccolon1	36
FRAGILIS-j14-exp1-colon_325	Sa_FRAGILIS-M1-j14-exp1-colon_SF_325.d	(02/20/17 00:00:00)	Sa_FRAGILIS-M1-j14-exp1-colon_SF_325	sfcolon1	116	Sa_FRAGILIS-M1-j14-exp1-colon_PA_325.d	(04/12/17 00:00:00)	Sa_FRAGILIS-M1-j14-exp1-colon_PA_325	pacolon1	40	Sa_FRAGILIS-M1-j14-exp1-colon_BA_325.d	(01/18/17 00:00:00)	Sa_FRAGILIS-M1-j14-exp1-colon_BA_325	bacolon1	121	Sa_FRAGILIS-M1-j14-exp1-colon_GCMRM_325.D	(01/27/17 00:00:00)	Sa_FRAGILIS-M1-j14-exp1-colon_325	gccolon1	37
FRAGILIS-j14-exp1-colon_330	Sa_FRAGILIS-M6-j14-exp1-colon_SF_330.d	(02/20/17 00:00:00)	Sa_FRAGILIS-M6-j14-exp1-colon_SF_330	sfcolon1	117	Sa_FRAGILIS-M6-j14-exp1-colon_PA_330.d	(04/12/17 00:00:00)	Sa_FRAGILIS-M6-j14-exp1-colon_PA_330	pacolon1	41	Sa_FRAGILIS-M6-j14-exp1-colon_BA_330.d	(01/18/17 00:00:00)	Sa_FRAGILIS-M6-j14-exp1-colon_BA_330	bacolon1	122	Sa_FRAGILIS-M6-j14-exp1-colon_GCMRM_330.D	(01/27/17 00:00:00)	Sa_FRAGILIS-M6-j14-exp1-colon_330	gccolon1	38
FRAGILIS-j7-exp1-colon_303	Sa_FRAGILIS-M3-j7-exp1-colon_SF_303.d	(02/20/17 00:00:00)	Sa_FRAGILIS-M3-j7-exp1-colon_SF_303	sfcolon1	119	Sa_FRAGILIS-M3-j7-exp1-colon_PA_303.d	(04/12/17 00:00:00)	Sa_FRAGILIS-M3-j7-exp1-colon_PA_303	pacolon1	43	Sa_FRAGILIS-M3-j7-exp1-colon_BA_303.d	(01/18/17 00:00:00)	Sa_FRAGILIS-M3-j7-exp1-colon_BA_303	bacolon1	124	Sa_FRAGILIS-M3-j7-exp1-colon_GCMRM_303.D	(01/27/17 00:00:00)	Sa_FRAGILIS-M3-j7-exp1-colon_303	gccolon1	40
FRAGILIS-j3-exp1-colon_273	Sa_FRAGILIS-M3-j3-exp1-colon_SF_273.d	(02/20/17 00:00:00)	Sa_FRAGILIS-M3-j3-exp1-colon_SF_273	sfcolon1	102	Sa_FRAGILIS-M3-j3-exp1-colon_PA_273.d	(04/12/17 00:00:00)	Sa_FRAGILIS-M3-j3-exp1-colon_PA_273	pacolon1	26	Sa_FRAGILIS-M3-j3-exp1-colon_BA_273.d	(01/18/17 00:00:00)	Sa_FRAGILIS-M3-j3-exp1-colon_BA_273	bacolon1	107	Sa_FRAGILIS-M3-j3-exp1-colon_GCMRM_273b.D	(01/27/17 00:00:00)	Sa_FRAGILIS-M3-j3-exp1-colon_273b	gccolon1	92
Nacl-j3-exp1-colon_254	Sa_Nacl-M2-j3-exp1-colon_SF_254.d	(02/20/17 00:00:00)	Sa_Nacl-M2-j3-exp1-colon_SF_254	sfcolon1	120	Sa_Nacl-M2-j3-exp1-colon_PA_254.d	(04/12/17 00:00:00)	Sa_Nacl-M2-j3-exp1-colon_PA_254	pacolon1	44	Sa_Nacl-M2-j3-exp1-colon_BA_254.d	(01/18/17 00:00:00)	Sa_Nacl-M2-j3-exp1-colon_BA_254	bacolon1	125	Sa_Nacl-M2-j3-exp1-colon_GCMRM_254.D	(01/27/17 00:00:00)	Sa_Nacl-M2-j3-exp1-colon_254	gccolon1	41
FRAGILIS-j3-exp1-colon_275	Sa_FRAGILIS-M5-j3-exp1-colon_SF_275.d	(02/20/17 00:00:00)	Sa_FRAGILIS-M5-j3-exp1-colon_SF_275	sfcolon1	121	Sa_FRAGILIS-M5-j3-exp1-colon_PA_275.d	(04/12/17 00:00:00)	Sa_FRAGILIS-M5-j3-exp1-colon_PA_275	pacolon1	45	Sa_FRAGILIS-M5-j3-exp1-colon_BA_275.d	(01/18/17 00:00:00)	Sa_FRAGILIS-M5-j3-exp1-colon_BA_275	bacolon1	126	Sa_FRAGILIS-M5-j3-exp1-colon_GCMRM_275.D	(01/27/17 00:00:00)	Sa_FRAGILIS-M5-j3-exp1-colon_275	gccolon1	42
HIRAE-j14-exp1-colon_324	Sa_HIRAE-M6-j14-exp1-colon_SF_324.d	(02/20/17 00:00:00)	Sa_HIRAE-M6-j14-exp1-colon_SF_324	sfcolon1	122	Sa_HIRAE-M6-j14-exp1-colon_PA_324.d	(04/12/17 00:00:00)	Sa_HIRAE-M6-j14-exp1-colon_PA_324	pacolon1	46	Sa_HIRAE-M6-j14-exp1-colon_BA_324.d	(01/18/17 00:00:00)	Sa_HIRAE-M6-j14-exp1-colon_BA_324	bacolon1	127	Sa_HIRAE-M6-j14-exp1-colon_GCMRM_324.D	(01/27/17 00:00:00)	Sa_HIRAE-M6-j14-exp1-colon_324	gccolon1	43
ATB-j7-exp1-colon_289	Sa_ATB-M1-j7-exp1-colon_SF_289.d	(02/20/17 00:00:00)	Sa_ATB-M1-j7-exp1-colon_SF_289	sfcolon1	123	Sa_ATB-M1-j7-exp1-colon_PA_289.d	(04/12/17 00:00:00)	Sa_ATB-M1-j7-exp1-colon_PA_289	pacolon1	47	Sa_ATB-M1-j7-exp1-colon_BA_289.d	(01/18/17 00:00:00)	Sa_ATB-M1-j7-exp1-colon_BA_289	bacolon1	128	Sa_ATB-M1-j7-exp1-colon_GCMRM_289.D	(01/27/17 00:00:00)	Sa_ATB-M1-j7-exp1-colon_289	gccolon1	44
ATB-j14-exp1-colon_315	Sa_ATB-M3-j14-exp1-colon_SF_315.d	(02/20/17 00:00:00)	Sa_ATB-M3-j14-exp1-colon_SF_315	sfcolon1	125	Sa_ATB-M3-j14-exp1-colon_PA_315.d	(04/12/17 00:00:00)	Sa_ATB-M3-j14-exp1-colon_PA_315	pacolon1	49	Sa_ATB-M3-j14-exp1-colon_BA_315.d	(01/18/17 00:00:00)	Sa_ATB-M3-j14-exp1-colon_BA_315	bacolon1	130	Sa_ATB-M3-j14-exp1-colon_GCMRM_315.D	(01/27/17 00:00:00)	Sa_ATB-M3-j14-exp1-colon_315	gccolon1	45
ATB-j7-exp1-colon_290	Sa_ATB-M2-j7-exp1-colon_SF_290.d	(02/20/17 00:00:00)	Sa_ATB-M2-j7-exp1-colon_SF_290	sfcolon1	126	Sa_ATB-M2-j7-exp1-colon_PA_290.d	(04/12/17 00:00:00)	Sa_ATB-M2-j7-exp1-colon_PA_290	pacolon1	50	Sa_ATB-M2-j7-exp1-colon_BA_290.d	(01/18/17 00:00:00)	Sa_ATB-M2-j7-exp1-colon_BA_290	bacolon1	131	Sa_ATB-M2-j7-exp1-colon_GCMRM_290.D	(01/27/17 00:00:00)	Sa_ATB-M2-j7-exp1-colon_290	gccolon1	46
BARNECIELA-j7-exp1-colon_307	Sa_ARNECIELA-M1-j7-exp1-colon_SF_307.d	(02/20/17 00:00:00)	Sa_ARNECIELA-M1-j7-exp1-colon_SF_307	sfcolon1	127	Sa_BARNECIELA-M1-j7-exp1-colon_PA_307.d	(04/12/17 00:00:00)	Sa_BARNECIELA-M1-j7-exp1-colon_PA_307	pacolon1	51	Sa_ARNECIELA-M1-j7-exp1-colon_BA_307.d	(01/18/17 00:00:00)	Sa_ARNECIELA-M1-j7-exp1-colon_BA_307	bacolon1	132	Sa_ARNECIELA-M1-j7-exp1-colon_GCMRM_307.D	(01/27/17 00:00:00)	Sa_ARNECIELA-M1-j7-exp1-colon_307	gccolon1	47
BARNECIELA-j3-exp1-colon_280	Sa_BARNECIELA-M4-j3-exp1-colon_SF_280.d	(02/20/17 00:00:00)	Sa_BARNECIELA-M4-j3-exp1-colon_SF_280	sfcolon1	128	Sa_BARNECIELA-M4-j3-exp1-colon_PA_280.d	(04/12/17 00:00:00)	Sa_BARNECIELA-M4-j3-exp1-colon_PA_280	pacolon1	52	Sa_BARNECIELA-M4-j3-exp1-colon_BA_280.d	(01/18/17 00:00:00)	Sa_BARNECIELA-M4-j3-exp1-colon_BA_280	bacolon1	133	Sa_BARNECIELA-M4-j3-exp1-colon_GCMRM_280.D	(01/27/17 00:00:00)	Sa_BARNECIELA-M4-j3-exp1-colon_280	gccolon1	48
Nacl-j7-exp1-colon_286	Sa_Nacl-M4-j7-exp1-colon_SF_286.d	(02/20/17 00:00:00)	Sa_Nacl-M4-j7-exp1-colon_SF_286	sfcolon1	129	Sa_Nacl-M4-j7-exp1-colon_PA_286.d	(04/12/17 00:00:00)	Sa_Nacl-M4-j7-exp1-colon_PA_286	pacolon1	53	Sa_Nacl-M4-j7-exp1-colon_BA_286.d	(01/18/17 00:00:00)	Sa_Nacl-M4-j7-exp1-colon_BA_286	bacolon1	134	Sa_Nacl-M4-j7-exp1-colon_GCMRM_286.D	(01/27/17 00:00:00)	Sa_Nacl-M4-j7-exp1-colon_286	gccolon1	49
Nacl-j3-exp1-colon_256	Sa_Nacl-M4-j3-exp1-colon_SF_256.d	(02/20/17 00:00:00)	Sa_Nacl-M4-j3-exp1-colon_SF_256	sfcolon1	130	Sa_Nacl-M4-j3-exp1-colon_PA_256.d	(04/12/17 00:00:00)	Sa_Nacl-M4-j3-exp1-colon_PA_256	pacolon1	54	Sa_Nacl-M4-j3-exp1-colon_BA_256.d	(01/18/17 00:00:00)	Sa_Nacl-M4-j3-exp1-colon_BA_256	bacolon1	135	Sa_Nacl-M4-j3-exp1-colon_GCMRM_256.D	(01/27/17 00:00:00)	Sa_Nacl-M4-j3-exp1-colon_256	gccolon1	50
BARNECIELA-j7-exp1-colon_311	Sa_BARNECIELA-M5-j7-exp1-colon_SF_311.d	(02/20/17 00:00:00)	Sa_BARNECIELA-M5-j7-exp1-colon_SF_311	sfcolon1	132	Sa_BARNECIELA-M5-j7-exp1-colon_PA_311.d	(04/12/17 00:00:00)	Sa_BARNECIELA-M5-j7-exp1-colon_PA_311	pacolon1	56	Sa_BARNECIELA-M5-j7-exp1-colon_BA_311.d	(01/18/17 00:00:00)	Sa_BARNECIELA-M5-j7-exp1-colon_BA_311	bacolon1	137	Sa_BARNECIELA-M5-j7-exp1-colon_GCMRM_311.D	(01/27/17 00:00:00)	Sa_BARNECIELA-M5-j7-exp1-colon_311	gccolon1	52
HIRAE-j7-exp1-colon_298	Sa_HIRAE-M4-j7-exp1-colon_SF_298.d	(02/20/17 00:00:00)	Sa_HIRAE-M4-j7-exp1-colon_SF_298	sfcolon1	133	Sa_HIRAE-M4-j7-exp1-colon_PA_298.d	(04/12/17 00:00:00)	Sa_HIRAE-M4-j7-exp1-colon_PA_298	pacolon1	57	Sa_HIRAE-M4-j7-exp1-colon_BA_298.d	(01/18/17 00:00:00)	Sa_HIRAE-M4-j7-exp1-colon_BA_298	bacolon1	138	Sa_HIRAE-M4-j7-exp1-colon_GCMRM_298.D	(01/27/17 00:00:00)	Sa_HIRAE-M4-j7-exp1-colon_298	gccolon1	53
HIRAE-j3-exp1-colon_268	Sa_HIRAE-M4-j3-exp1-colon_SF_268.d	(02/20/17 00:00:00)	Sa_HIRAE-M4-j3-exp1-colon_SF_268	sfcolon1	134	Sa_HIRAE-M4-j3-exp1-colon_PA_268.d	(04/12/17 00:00:00)	Sa_HIRAE-M4-j3-exp1-colon_PA_268	pacolon1	58	Sa_HIRAE-M4-j3-exp1-colon_BA_268.d	(01/18/17 00:00:00)	Sa_HIRAE-M4-j3-exp1-colon_BA_268	bacolon1	139	Sa_HIRAE-M4-j3-exp1-colon_GCMRM_268.D	(01/27/17 00:00:00)	Sa_HIRAE-M4-j3-exp1-colon_268	gccolon1	54
FRAGILIS-j3-exp1-colon_271	Sa_FRAGILIS-M1-j3-exp1-colon_SF_271.d	(02/20/17 00:00:00)	Sa_FRAGILIS-M1-j3-exp1-colon_SF_271	sfcolon1	124	Sa_FRAGILIS-M1-j3-exp1-colon_PA_271.d	(04/12/17 00:00:00)	Sa_FRAGILIS-M1-j3-exp1-colon_PA_271	pacolon1	48	Sa_FRAGILIS-M1-j3-exp1-colon_BA_271.d	(01/18/17 00:00:00)	Sa_FRAGILIS-M1-j3-exp1-colon_BA_271	bacolon1	129	Sa_FRAGILIS-M1-j3-exp1-colon_GCMRM_271b.D	(01/27/17 00:00:00)	Sa_FRAGILIS-M1-j3-exp1-colon_271b	gccolon1	87
BARNECIELA-j3-exp1-colon_281	Sa_BARNECIELA-M5-j3-exp1-colon_SF_281.d	(02/20/17 00:00:00)	Sa_BARNECIELA-M5-j3-exp1-colon_SF_281	sfcolon1	135	Sa_BARNECIELA-M5-j3-exp1-colon_PA_281.d	(04/12/17 00:00:00)	Sa_BARNECIELA-M5-j3-exp1-colon_PA_281	pacolon1	59	Sa_BARNECIELA-M5-j3-exp1-colon_BA_281.d	(01/18/17 00:00:00)	Sa_BARNECIELA-M5-j3-exp1-colon_BA_281	bacolon1	140	Sa_BARNECIELA-M5-j3-exp1-colon_GCMRM_281.D	(01/27/17 00:00:00)	Sa_BARNECIELA-M5-j3-exp1-colon_281	gccolon1	55
HIRAE-j3-exp1-colon_265	Sa_HIRAE-M1-j3-exp1-colon_SF_265.d	(02/23/17 00:00:00)	Sa_HIRAE-M1-j3-exp1-colon_SF_265	sfcolon1	136	Sa_HIRAE-M1-j3-exp1-colon_PA_265.d	(04/12/17 00:00:00)	Sa_HIRAE-M1-j3-exp1-colon_PA_265	pacolon1	60	Sa_HIRAE-M1-j3-exp1-colon_BA_265.d	(01/18/17 00:00:00)	Sa_HIRAE-M1-j3-exp1-colon_BA_265	bacolon1	141	Sa_HIRAE-M1-j3-exp1-colon_GCMRM_265.D	(01/27/17 00:00:00)	Sa_HIRAE-M1-j3-exp1-colon_265	gccolon1	56
HIRAE-j14-exp1-colon_321	Sa_HIRAE-M3-j14-exp1-colon_SF_321.d	(02/23/17 00:00:00)	Sa_HIRAE-M3-j14-exp1-colon_SF_321	sfcolon1	137	Sa_HIRAE-M3-j14-exp1-colon_PA_321.d	(04/12/17 00:00:00)	Sa_HIRAE-M3-j14-exp1-colon_PA_321	pacolon1	61	Sa_HIRAE-M3-j14-exp1-colon_BA_321.d	(01/18/17 00:00:00)	Sa_HIRAE-M3-j14-exp1-colon_BA_321	bacolon1	142	Sa_HIRAE-M3-j14-exp1-colon_GCMRM_321.D	(01/27/17 00:00:00)	Sa_HIRAE-M3-j14-exp1-colon_321	gccolon1	57
BARNECIELA-j14-exp1-colon_332	Sa_BARNECIELA-M2-j14-exp1-colon_SF_332.d	(02/23/17 00:00:00)	Sa_BARNECIELA-M2-j14-exp1-colon_SF_332	sfcolon1	138	Sa_BARNECIELA-M2-j14-exp1-colon_PA_332.d	(04/12/17 00:00:00)	Sa_BARNECIELA-M2-j14-exp1-colon_PA_332	pacolon1	62	Sa_BARNECIELA-M2-j14-exp1-colon_BA_332.d	(01/18/17 00:00:00)	Sa_BARNECIELA-M2-j14-exp1-colon_BA_332	bacolon1	143	Sa_BARNECIELA-M2-j14-exp1-colon_GCMRM_332.D	(01/27/17 00:00:00)	Sa_BARNECIELA-M2-j14-exp1-colon_332	gccolon1	58
BARNECIELA-j14-exp1-colon_335	Sa_BARNECIELA-M5-j14-exp1-colon_SF_335.d	(02/23/17 00:00:00)	Sa_BARNECIELA-M5-j14-exp1-colon_SF_335	sfcolon1	139	Sa_BARNECIELA-M5-j14-exp1-colon_PA_335.d	(04/12/17 00:00:00)	Sa_BARNECIELA-M5-j14-exp1-colon_PA_335	pacolon1	63	Sa_BARNECIELA-M5-j14-exp1-colon_BA_335.d	(01/18/17 00:00:00)	Sa_BARNECIELA-M5-j14-exp1-colon_BA_335	bacolon1	144	Sa_BARNECIELA-M5-j14-exp1-colon_GCMRM_335.D	(01/27/17 00:00:00)	Sa_BARNECIELA-M5-j14-exp1-colon_335	gccolon1	59
FRAGILIS-j7-exp1-colon_302	Sa_FRAGILIS-M2-j7-exp1-colon_SF_302.d	(02/23/17 00:00:00)	Sa_FRAGILIS-M2-j7-exp1-colon_SF_302	sfcolon1	140	Sa_FRAGILIS-M2-j7-exp1-colon_PA_302.d	(04/12/17 00:00:00)	Sa_FRAGILIS-M2-j7-exp1-colon_PA_302	pacolon1	64	Sa_FRAGILIS-M2-j7-exp1-colon_BA_302.d	(01/18/17 00:00:00)	Sa_FRAGILIS-M2-j7-exp1-colon_BA_302	bacolon1	145	Sa_FRAGILIS-M2-j7-exp1-colon_GCMRM_302.D	(01/27/17 00:00:00)	Sa_FRAGILIS-M2-j7-exp1-colon_302	gccolon1	60
ATB-j3-exp1-colon_262	Sa_ATB-M4-j3-exp1-colon_SF_262.d	(02/23/17 00:00:00)	Sa_ATB-M4-j3-exp1-colon_SF_262	sfcolon1	141	Sa_ATB-M4-j3-exp1-colon_PA_262.d	(04/12/17 00:00:00)	Sa_ATB-M4-j3-exp1-colon_PA_262	pacolon1	65	Sa_ATB-M4-j3-exp1-colon_BA_262.d	(01/18/17 00:00:00)	Sa_ATB-M4-j3-exp1-colon_BA_262	bacolon1	146	Sa_ATB-M4-j3-exp1-colon_GCMRM_262.D	(01/27/17 00:00:00)	Sa_ATB-M4-j3-exp1-colon_262	gccolon1	61
HIRAE-j3-exp1-colon_266	Sa_HIRAE-M2-j3-exp1-colon_SF_266.d	(02/23/17 00:00:00)	Sa_HIRAE-M2-j3-exp1-colon_SF_266	sfcolon1	142	Sa_HIRAE-M2-j3-exp1-colon_PA_266.d	(04/12/17 00:00:00)	Sa_HIRAE-M2-j3-exp1-colon_PA_266	pacolon1	66	Sa_HIRAE-M2-j3-exp1-colon_BA_266.d	(01/18/17 00:00:00)	Sa_HIRAE-M2-j3-exp1-colon_BA_266	bacolon1	147	Sa_HIRAE-M2-j3-exp1-colon_GCMRM_266.D	(01/27/17 00:00:00)	Sa_HIRAE-M2-j3-exp1-colon_266	gccolon1	62
FRAGILIS-j14-exp1-colon_329	Sa_FRAGILIS-M5-j14-exp1-colon_SF_329.d	(02/23/17 00:00:00)	Sa_FRAGILIS-M5-j14-exp1-colon_SF_329	sfcolon1	143	Sa_FRAGILIS-M5-j14-exp1-colon_PA_329.d	(04/12/17 00:00:00)	Sa_FRAGILIS-M5-j14-exp1-colon_PA_329	pacolon1	67	Sa_FRAGILIS-M5-j14-exp1-colon_BA_329.d	(01/18/17 00:00:00)	Sa_FRAGILIS-M5-j14-exp1-colon_BA_329	bacolon1	148	Sa_FRAGILIS-M5-j14-exp1-colon_GCMRM_329.D	(01/27/17 00:00:00)	Sa_FRAGILIS-M5-j14-exp1-colon_329	gccolon1	63
ATB-j7-exp1-colon_292	Sa_ATB-M4-j7-exp1-colon_SF_292.d	(02/23/17 00:00:00)	Sa_ATB-M4-j7-exp1-colon_SF_292	sfcolon1	145	Sa_ATB-M4-j7-exp1-colon_PA_292.d	(04/12/17 00:00:00)	Sa_ATB-M4-j7-exp1-colon_PA_292	pacolon1	69	Sa_ATB-M4-j7-exp1-colon_BA_292.d	(01/18/17 00:00:00)	Sa_ATB-M4-j7-exp1-colon_BA_292	bacolon1	150	Sa_ATB-M4-j7-exp1-colon_GCMRM_292.D	(01/27/17 00:00:00)	Sa_ATB-M4-j7-exp1-colon_292	gccolon1	65
ATB-j14-exp1-colon_313	Sa_ATB-M1-j14-exp1-colon_SF_313.d	(02/23/17 00:00:00)	Sa_ATB-M1-j14-exp1-colon_SF_313	sfcolon1	146	Sa_ATB-M1-j14-exp1-colon_PA_313.d	(04/12/17 00:00:00)	Sa_ATB-M1-j14-exp1-colon_PA_313	pacolon1	70	Sa_ATB-M1-j14-exp1-colon_BA_313.d	(01/18/17 00:00:00)	Sa_ATB-M1-j14-exp1-colon_BA_313	bacolon1	151	Sa_ATB-M1-j14-exp1-colon_GCMRM_313.D	(01/27/17 00:00:00)	Sa_ATB-M1-j14-exp1-colon_313	gccolon1	66
Nacl-j3-exp1-colon_258	Sa_Nacl-M6-j3-exp1-colon_SF_258.d	(02/23/17 00:00:00)	Sa_Nacl-M6-j3-exp1-colon_SF_258	sfcolon1	147	Sa_Nacl-M6-j3-exp1-colon_PA_258.d	(04/12/17 00:00:00)	Sa_Nacl-M6-j3-exp1-colon_PA_258	pacolon1	71	Sa_Nacl-M6-j3-exp1-colon_BA_258.d	(01/18/17 00:00:00)	Sa_Nacl-M6-j3-exp1-colon_BA_258	bacolon1	152	Sa_Nacl-M6-j3-exp1-colon_GCMRM_258.D	(01/27/17 00:00:00)	Sa_Nacl-M6-j3-exp1-colon_258	gccolon1	67
Nacl-j3-exp2-colon_200	Sa_Nacl-M2-j3-exp2-colon_SF_200b.d	(02/17/17 00:00:00)	Sa_Nacl-M2-j3-exp2-colon_SF_200b	sfcolon2	51	Sa_Nacl-M2-j3-exp2-colon_PA_200.d	(04/12/17 00:00:00)	Sa_Nacl-M2-j3-exp2-colon_PA_200	pacolon2	100	Sa_Nacl-M2-j3-exp2-colon_BA_200.d	(01/18/17 00:00:00)	Sa_Nacl-M2-j3-exp2-colon_BA_200	bacolon2	186	Sa_Nacl-M2-j3-exp2-colon_GCMRM_200.D	(02/02/17 00:00:00)	Sa_Nacl-M2-j3-exp2-colon_200	gccolon2	100
HIRAE-j14-exp1-colon_320	Sa_HIRAE-M2-j14-exp1-colon_SF_320.d	(02/23/17 00:00:00)	Sa_HIRAE-M2-j14-exp1-colon_SF_320	sfcolon1	148	Sa_HIRAE-M2-j14-exp1-colon_PA_320.d	(04/12/17 00:00:00)	Sa_HIRAE-M2-j14-exp1-colon_PA_320	pacolon1	72	Sa_HIRAE-M2-j14-exp1-colon_BA_320.d	(01/18/17 00:00:00)	Sa_HIRAE-M2-j14-exp1-colon_BA_320	bacolon1	153	Sa_HIRAE-M2-j14-exp1-colon_GCMRM_320.D	(01/27/17 00:00:00)	Sa_HIRAE-M2-j14-exp1-colon_320	gccolon1	68
ATB-j3-exp2-colon_208	Sa_ATB-M4-j3-exp2-colon_SF_208b.d	(02/17/17 00:00:00)	Sa_ATB-M4-j3-exp2-colon_SF_208b	sfcolon2	52	Sa_ATB-M4-j3-exp2-colon_PA_208.d	(04/12/17 00:00:00)	Sa_ATB-M4-j3-exp2-colon_PA_208	pacolon2	101	Sa_ATB-M4-j3-exp2-colon_BA_208.d	(01/18/17 00:00:00)	Sa_ATB-M4-j3-exp2-colon_BA_208	bacolon2	187	Sa_ATB-M4-j3-exp2-colon_GCMRM_208.D	(02/02/17 00:00:00)	Sa_ATB-M4-j3-exp2-colon_208	gccolon2	101
ATB-j3-exp1-colon_260	Sa_ATB-M2-j3-exp1-colon_SF_260.d	(02/23/17 00:00:00)	Sa_ATB-M2-j3-exp1-colon_SF_260	sfcolon1	149	Sa_ATB-M2-j3-exp1-colon_PA_260.d	(04/12/17 00:00:00)	Sa_ATB-M2-j3-exp1-colon_PA_260	pacolon1	73	Sa_ATB-M2-j3-exp1-colon_BA_260.d	(01/18/17 00:00:00)	Sa_ATB-M2-j3-exp1-colon_BA_260	bacolon1	154	Sa_ATB-M2-j3-exp1-colon_GCMRM_260.D	(01/27/17 00:00:00)	Sa_ATB-M2-j3-exp1-colon_260	gccolon1	69
MITSUAKI-j3-exp2-colon_220	Sa_MITSUAKI-M4-j3-exp2-colon_SF_220b.d	(02/17/17 00:00:00)	Sa_MITSUAKI-M4-j3-exp2-colon_SF_220b	sfcolon2	53	Sa_MITSUAKI-M4-j3-exp2-colon_PA_220.d	(04/12/17 00:00:00)	Sa_MITSUAKI-M4-j3-exp2-colon_PA_220	pacolon2	102	Sa_MITSUAKI-M4-j3-exp2-colon_BA_220.d	(01/18/17 00:00:00)	Sa_MITSUAKI-M4-j3-exp2-colon_BA_220	bacolon2	188	Sa_MITSUAKI-M4-j3-exp2-colon_GCMRM_220.D	(02/02/17 00:00:00)	Sa_MITSUAKI-M4-j3-exp2-colon_220	gccolon2	102
HIRAE-j7-exp1-colon_296	Sa_HIRAE-M2-j7-exp1-colon_SF_296.d	(02/23/17 00:00:00)	Sa_HIRAE-M2-j7-exp1-colon_SF_296	sfcolon1	150	Sa_HIRAE-M2-j7-exp1-colon_PA_296.d	(04/12/17 00:00:00)	Sa_HIRAE-M2-j7-exp1-colon_PA_296	pacolon1	74	Sa_HIRAE-M2-j7-exp1-colon_BA_296.d	(01/18/17 00:00:00)	Sa_HIRAE-M2-j7-exp1-colon_BA_296	bacolon1	155	Sa_HIRAE-M2-j7-exp1-colon_GCMRM_296.D	(01/27/17 00:00:00)	Sa_HIRAE-M2-j7-exp1-colon_296	gccolon1	70
ATB-j7-exp2-colon_232	Sa_ATB-M4-j7-exp2-colon_SF_232b.d	(02/17/17 00:00:00)	Sa_ATB-M4-j7-exp2-colon_SF_232b	sfcolon2	54	Sa_ATB-M4-j7-exp2-colon_PA_232.d	(04/12/17 00:00:00)	Sa_ATB-M4-j7-exp2-colon_PA_232	pacolon2	103	Sa_ATB-M4-j7-exp2-colon_BA_232.d	(01/18/17 00:00:00)	Sa_ATB-M4-j7-exp2-colon_BA_232	bacolon2	189	Sa_ATB-M4-j7-exp2-colon_GCMRM_232.D	(02/02/17 00:00:00)	Sa_ATB-M4-j7-exp2-colon_232	gccolon2	103
FRAGILIS-j3-exp1-colon_272	Sa_FRAGILIS-M2-j3-exp1-colon_SF_272.d	(02/23/17 00:00:00)	Sa_FRAGILIS-M2-j3-exp1-colon_SF_272	sfcolon1	151	Sa_FRAGILIS-M2-j3-exp1-colon_PA_272.d	(04/12/17 00:00:00)	Sa_FRAGILIS-M2-j3-exp1-colon_PA_272	pacolon1	75	Sa_FRAGILIS-M2-j3-exp1-colon_BA_272.d	(01/18/17 00:00:00)	Sa_FRAGILIS-M2-j3-exp1-colon_BA_272	bacolon1	156	Sa_FRAGILIS-M2-j3-exp1-colon_GCMRM_272.D	(01/27/17 00:00:00)	Sa_FRAGILIS-M2-j3-exp1-colon_272	gccolon1	71
MITSUAKI-j7-exp2-colon_244	Sa_MITSUAKI-M4-j7-exp2-colon_SF_244b.d	(02/17/17 00:00:00)	Sa_MITSUAKI-M4-j7-exp2-colon_SF_244b	sfcolon2	55	Sa_MITSUAKI-M4-j7-exp2-colon_PA_244.d	(04/12/17 00:00:00)	Sa_MITSUAKI-M4-j7-exp2-colon_PA_244	pacolon2	104	Sa_MITSUAKI-M4-j7-exp2-colon_BA_244.d	(01/18/17 00:00:00)	Sa_MITSUAKI-M4-j7-exp2-colon_BA_244	bacolon2	190	Sa_MITSUAKI-M4-j7-exp2-colon_GCMRM_244.D	(02/02/17 00:00:00)	Sa_MITSUAKI-M4-j7-exp2-colon_244	gccolon2	104
BARNECIELA-j7-exp1-colon_308	Sa_BARNECIELA-M2-j7-exp1-colon_SF_308.d	(02/23/17 00:00:00)	Sa_BARNECIELA-M2-j7-exp1-colon_SF_308	sfcolon1	152	Sa_BARNECIELA-M2-j7-exp1-colon_PA_308.d	(04/12/17 00:00:00)	Sa_BARNECIELA-M2-j7-exp1-colon_PA_308	pacolon1	76	Sa_BARNECIELA-M2-j7-exp1-colon_BA_308.d	(01/18/17 00:00:00)	Sa_BARNECIELA-M2-j7-exp1-colon_BA_308	bacolon1	157	Sa_BARNECIELA-M2-j7-exp1-colon_GCMRM_308.D	(01/27/17 00:00:00)	Sa_BARNECIELA-M2-j7-exp1-colon_308	gccolon1	72
BURKO-j3-exp2-colon_214	Sa_BURKO-M4-j3-exp2-colon_SF_214b.d	(02/17/17 00:00:00)	Sa_BURKO-M4-j3-exp2-colon_SF_214b	sfcolon2	56	Sa_BURKO-M4-j3-exp2-colon_PA_214.d	(04/12/17 00:00:00)	Sa_BURKO-M4-j3-exp2-colon_PA_214	pacolon2	105	Sa_BURKO-M4-j3-exp2-colon_BA_214.d	(01/18/17 00:00:00)	Sa_BURKO-M4-j3-exp2-colon_BA_214	bacolon2	191	Sa_BURKO-M4-j3-exp2-colon_GCMRM_214.D	(02/02/17 00:00:00)	Sa_BURKO-M4-j3-exp2-colon_214	gccolon2	105
Nacl-j7-exp1-colon_288	Sa_Nacl-M6-j7-exp1-colon_SF_288.d	(02/23/17 00:00:00)	Sa_Nacl-M6-j7-exp1-colon_SF_288	sfcolon1	153	Sa_Nacl-M6-j7-exp1-colon_PA_288.d	(04/12/17 00:00:00)	Sa_Nacl-M6-j7-exp1-colon_PA_288	pacolon1	77	Sa_Nacl-M6-j7-exp1-colon_BA_288.d	(01/18/17 00:00:00)	Sa_Nacl-M6-j7-exp1-colon_BA_288	bacolon1	158	Sa_Nacl-M6-j7-exp1-colon_GCMRM_288.D	(01/27/17 00:00:00)	Sa_Nacl-M6-j7-exp1-colon_288	gccolon1	73
ATB-j14-exp2-colon_251	Sa_ATB-M5-j14-exp2-colon_SF_251b.d	(02/17/17 00:00:00)	Sa_ATB-M5-j14-exp2-colon_SF_251b	sfcolon2	57	Sa_ATB-M5-j14-exp2-colon_PA_251.d	(04/12/17 00:00:00)	Sa_ATB-M5-j14-exp2-colon_PA_251	pacolon2	106	Sa_ATB-M5-j14-exp2-colon_BA_251.d	(01/18/17 00:00:00)	Sa_ATB-M5-j14-exp2-colon_BA_251	bacolon2	192	Sa_ATB-M5-j14-exp2-colon_GCMRM_251.D	(02/02/17 00:00:00)	Sa_ATB-M5-j14-exp2-colon_251	gccolon2	106
FRAGILIS-j3-exp1-colon_276	Sa_FRAGILIS-M6-j3-exp1-colon_SF_276.d	(02/23/17 00:00:00)	Sa_FRAGILIS-M6-j3-exp1-colon_SF_276	sfcolon1	154	Sa_FRAGILIS-M6-j3-exp1-colon_PA_276.d	(04/12/17 00:00:00)	Sa_FRAGILIS-M6-j3-exp1-colon_PA_276	pacolon1	78	Sa_FRAGILIS-M6-j3-exp1-colon_BA_276.d	(01/18/17 00:00:00)	Sa_FRAGILIS-M6-j3-exp1-colon_BA_276	bacolon1	159	Sa_FRAGILIS-M6-j3-exp1-colon_GCMRM_276.D	(01/27/17 00:00:00)	Sa_FRAGILIS-M6-j3-exp1-colon_276	gccolon1	74
Nacl-j3-exp2-colon_201	Sa_Nacl-M3-j3-exp2-colon_SF_201b.d	(02/17/17 00:00:00)	Sa_Nacl-M3-j3-exp2-colon_SF_201b	sfcolon2	4	Sa_Nacl-M3-j3-exp2-colon_PA_201.d	(04/12/17 00:00:00)	Sa_Nacl-M3-j3-exp2-colon_PA_201	pacolon2	125	Sa_Nacl-M3-j3-exp2-colon_BA_201.d	(01/18/17 00:00:00)	Sa_Nacl-M3-j3-exp2-colon_BA_201	bacolon2	211	Sa_Nacl-M3-j3-exp2-colon_GCMRM_201.D	(02/02/17 00:00:00)	Sa_Nacl-M3-j3-exp2-colon_201	gccolon2	125
Nacl-j7-exp2-colon_227	Sa_Nacl-M5-j7-exp2-colon_SF_227b.d	(02/17/17 00:00:00)	Sa_Nacl-M5-j7-exp2-colon_SF_227b	sfcolon2	58	Sa_Nacl-M5-j7-exp2-colon_PA_227.d	(04/12/17 00:00:00)	Sa_Nacl-M5-j7-exp2-colon_PA_227	pacolon2	107	Sa_Nacl-M5-j7-exp2-colon_BA_227.d	(01/18/17 00:00:00)	Sa_Nacl-M5-j7-exp2-colon_BA_227	bacolon2	193	Sa_Nacl-M5-j7-exp2-colon_GCMRM_227.D	(02/02/17 00:00:00)	Sa_Nacl-M5-j7-exp2-colon_227	gccolon2	107
ATB-j14-exp1-colon_318	Sa_ATB-M6-j14-exp1-colon_SF_318.d	(02/23/17 00:00:00)	Sa_ATB-M6-j14-exp1-colon_SF_318	sfcolon1	155	Sa_ATB-M6-j14-exp1-colon_PA_318.d	(04/12/17 00:00:00)	Sa_ATB-M6-j14-exp1-colon_PA_318	pacolon1	79	Sa_ATB-M6-j14-exp1-colon_BA_318.d	(01/18/17 00:00:00)	Sa_ATB-M6-j14-exp1-colon_BA_318	bacolon1	160	Sa_ATB-M6-j14-exp1-colon_GCMRM_318.D	(01/27/17 00:00:00)	Sa_ATB-M6-j14-exp1-colon_318	gccolon1	75
MITSUAKI-j3-exp2-colon_222	Sa_MITSUAKI-M6-j3-exp2-colon_SF_222.d	(02/17/17 00:00:00)	Sa_MITSUAKI-M6-j3-exp2-colon_SF_222	sfcolon2	5	Sa_MITSUAKI-M6-j3-exp2-colon_PA_222.d	(04/12/17 00:00:00)	Sa_MITSUAKI-M6-j3-exp2-colon_PA_222	pacolon2	126	Sa_MITSUAKI-M6-j3-exp2-colon_BA_222.d	(01/18/17 00:00:00)	Sa_MITSUAKI-M6-j3-exp2-colon_BA_222	bacolon2	212	Sa_MITSUAKI-M6-j3-exp2-colon_GCMRM_222.D	(02/02/17 00:00:00)	Sa_MITSUAKI-M6-j3-exp2-colon_222	gccolon2	126
BURKO-j14-exp2-colon_257	Sa_BURKO-M5-j14-exp2-colon_SF_257b.d	(02/17/17 00:00:00)	Sa_BURKO-M5-j14-exp2-colon_SF_257b	sfcolon2	59	Sa_BURKO-M5-j14-exp2-colon_PA_257.d	(04/12/17 00:00:00)	Sa_BURKO-M5-j14-exp2-colon_PA_257	pacolon2	108	Sa_BURKO-M5-j14-exp2-colon_BA_257.d	(01/18/17 00:00:00)	Sa_BURKO-M5-j14-exp2-colon_BA_257	bacolon2	194	Sa_BURKO-M5-j14-exp2-colon_GCMRM_257.D	(02/02/17 00:00:00)	Sa_BURKO-M5-j14-exp2-colon_257	gccolon2	108
ATB-j3-exp2-colon_210	Sa_ATB-M6-j3-exp2-colon_SF_210.d	(02/17/17 00:00:00)	Sa_ATB-M6-j3-exp2-colon_SF_210	sfcolon2	6	Sa_ATB-M6-j3-exp2-colon_PA_210.d	(04/12/17 00:00:00)	Sa_ATB-M6-j3-exp2-colon_PA_210	pacolon2	127	Sa_ATB-M6-j3-exp2-colon_BA_210.d	(01/18/17 00:00:00)	Sa_ATB-M6-j3-exp2-colon_BA_210	bacolon2	213	Sa_ATB-M6-j3-exp2-colon_GCMRM_210.D	(02/02/17 00:00:00)	Sa_ATB-M6-j3-exp2-colon_210	gccolon2	127
MITSUAKI-j14-exp2-colon_263	Sa_MITSUAKI-M5-j14-exp2-colon_SF_263b.d	(02/17/17 00:00:00)	Sa_MITSUAKI-M5-j14-exp2-colon_SF_263b	sfcolon2	60	Sa_MITSUAKI-M5-j14-exp2-colon_PA_263.d	(04/12/17 00:00:00)	Sa_MITSUAKI-M5-j14-exp2-colon_PA_263	pacolon2	109	Sa_MITSUAKI-M5-j14-exp2-colon_BA_263.d	(01/18/17 00:00:00)	Sa_MITSUAKI-M5-j14-exp2-colon_BA_263	bacolon2	195	Sa_MITSUAKI-M5-j14-exp2-colon_GCMRM_263.D	(02/02/17 00:00:00)	Sa_MITSUAKI-M5-j14-exp2-colon_263	gccolon2	109
BARNECIELA-j14-exp1-colon_333	Sa_BARNECIELA-M3-j14-exp1-colon_SF_333.d	(02/23/17 00:00:00)	Sa_BARNECIELA-M3-j14-exp1-colon_SF_333	sfcolon1	157	Sa_BARNECIELA-M3-j14-exp1-colon_PA_333.d	(04/12/17 00:00:00)	Sa_BARNECIELA-M3-j14-exp1-colon_PA_333	pacolon1	81	Sa_BARNECIELA-M3-j14-exp1-colon_BA_333.d	(01/18/17 00:00:00)	Sa_BARNECIELA-M3-j14-exp1-colon_BA_333	bacolon1	162	Sa_BARNECIELA-M3-j14-exp1-colon_GCMRM_333.D	(01/27/17 00:00:00)	Sa_BARNECIELA-M3-j14-exp1-colon_333	gccolon1	77
BURKO-j3-exp2-colon_216	Sa_BURKO-M6-j3-exp2-colon_SF_216.d	(02/17/17 00:00:00)	Sa_BURKO-M6-j3-exp2-colon_SF_216	sfcolon2	7	Sa_BURKO-M6-j3-exp2-colon_PA_216.d	(04/12/17 00:00:00)	Sa_BURKO-M6-j3-exp2-colon_PA_216	pacolon2	128	Sa_BURKO-M6-j3-exp2-colon_BA_216.d	(01/18/17 00:00:00)	Sa_BURKO-M6-j3-exp2-colon_BA_216	bacolon2	214	Sa_BURKO-M6-j3-exp2-colon_GCMRM_216.D	(02/02/17 00:00:00)	Sa_BURKO-M6-j3-exp2-colon_216	gccolon2	128
BURKO-j7-exp2-colon_238	Sa_BURKO-M4-j7-exp2-colon_SF_238b.d	(02/17/17 00:00:00)	Sa_BURKO-M4-j7-exp2-colon_SF_238b	sfcolon2	61	Sa_BURKO-M4-j7-exp2-colon_PA_238.d	(04/12/17 00:00:00)	Sa_BURKO-M4-j7-exp2-colon_PA_238	pacolon2	110	Sa_BURKO-M4-j7-exp2-colon_BA_238b.d	(01/18/17 00:00:00)	Sa_BURKO-M4-j7-exp2-colon_BA_238b	bacolon2	196	Sa_BURKO-M4-j7-exp2-colon_GCMRM_238.D	(02/02/17 00:00:00)	Sa_BURKO-M4-j7-exp2-colon_238	gccolon2	110
BARNECIELA-j3-exp1-colon_282	Sa_BARNECIELA-M6-j3-exp1-colon_SF_282.d	(02/23/17 00:00:00)	Sa_BARNECIELA-M6-j3-exp1-colon_SF_282	sfcolon1	158	Sa_BARNECIELA-M6-j3-exp1-colon_PA_282.d	(04/12/17 00:00:00)	Sa_BARNECIELA-M6-j3-exp1-colon_PA_282	pacolon1	82	Sa_BARNECIELA-M6-j3-exp1-colon_BA_282.d	(01/18/17 00:00:00)	Sa_BARNECIELA-M6-j3-exp1-colon_BA_282	bacolon1	163	Sa_BARNECIELA-M6-j3-exp1-colon_GCMRM_282.D	(01/27/17 00:00:00)	Sa_BARNECIELA-M6-j3-exp1-colon_282	gccolon1	78
MITSUAKI-j7-exp2-colon_243	Sa_MITSUAKI-M3-j7-exp2-colon_SF_243.d	(02/17/17 00:00:00)	Sa_MITSUAKI-M3-j7-exp2-colon_SF_243	sfcolon2	8	Sa_MITSUAKI-M3-j7-exp2-colon_PA_243.d	(04/12/17 00:00:00)	Sa_MITSUAKI-M3-j7-exp2-colon_PA_243	pacolon2	129	Sa_MITSUAKI-M3-j7-exp2-colon_BA_243.d	(01/18/17 00:00:00)	Sa_MITSUAKI-M3-j7-exp2-colon_BA_243	bacolon2	215	Sa_MITSUAKI-M3-j7-exp2-colon_GCMRM_243.D	(02/02/17 00:00:00)	Sa_MITSUAKI-M3-j7-exp2-colon_243	gccolon2	129
HIRAE-j7-exp1-colon_300	Sa_HIRAE-M6-j7-exp1-colon_SF_300.d	(02/23/17 00:00:00)	Sa_HIRAE-M6-j7-exp1-colon_SF_300	sfcolon1	159	Sa_HIRAE-M6-j7-exp1-colon_PA_300.d	(04/12/17 00:00:00)	Sa_HIRAE-M6-j7-exp1-colon_PA_300	pacolon1	83	Sa_HIRAE-M6-j7-exp1-colon_BA_300.d	(01/18/17 00:00:00)	Sa_HIRAE-M6-j7-exp1-colon_BA_300	bacolon1	164	Sa_HIRAE-M6-j7-exp1-colon_GCMRM_300.D	(01/27/17 00:00:00)	Sa_HIRAE-M6-j7-exp1-colon_300	gccolon1	79
Nacl-j7-exp2-colon_226	Sa_Nacl-M4-j7-exp2-colon_SF_226.d	(02/17/17 00:00:00)	Sa_Nacl-M4-j7-exp2-colon_SF_226	sfcolon2	9	Sa_Nacl-M4-j7-exp2-colon_PA_226.d	(04/12/17 00:00:00)	Sa_Nacl-M4-j7-exp2-colon_PA_226	pacolon2	130	Sa_Nacl-M4-j7-exp2-colon_BA_226.d	(01/18/17 00:00:00)	Sa_Nacl-M4-j7-exp2-colon_BA_226	bacolon2	216	Sa_Nacl-M4-j7-exp2-colon_GCMRM_226.D	(02/02/17 00:00:00)	Sa_Nacl-M4-j7-exp2-colon_226	gccolon2	130
BURKO-j3-exp2-colon_213	Sa_BURKO-M3-j3-exp2-colon_SF_213b.d	(02/17/17 00:00:00)	Sa_BURKO-M3-j3-exp2-colon_SF_213b	sfcolon2	63	Sa_BURKO-M3-j3-exp2-colon_PA_213.d	(04/12/17 00:00:00)	Sa_BURKO-M3-j3-exp2-colon_PA_213	pacolon2	112	Sa_BURKO-M3-j3-exp2-colon_BA_213.d	(01/18/17 00:00:00)	Sa_BURKO-M3-j3-exp2-colon_BA_213	bacolon2	198	Sa_BURKO-M3-j3-exp2-colon_GCMRM_213.D	(02/02/17 00:00:00)	Sa_BURKO-M3-j3-exp2-colon_213	gccolon2	112
HIRAE-j3-exp1-colon_270	Sa_HIRAE-M6-j3-exp1-colon_SF_270.d	(02/23/17 00:00:00)	Sa_HIRAE-M6-j3-exp1-colon_SF_270	sfcolon1	160	Sa_HIRAE-M6-j3-exp1-colon_PA_270.d	(04/12/17 00:00:00)	Sa_HIRAE-M6-j3-exp1-colon_PA_270	pacolon1	84	Sa_HIRAE-M6-j3-exp1-colon_BA_270.d	(01/18/17 00:00:00)	Sa_HIRAE-M6-j3-exp1-colon_BA_270	bacolon1	165	Sa_HIRAE-M6-j3-exp1-colon_GCMRM_270.D	(01/27/17 00:00:00)	Sa_HIRAE-M6-j3-exp1-colon_270	gccolon1	80
MITSUAKI-j7-exp2-colon_245	Sa_MITSUAKI-M5-j7-exp2-colon_SF_245.d	(02/17/17 00:00:00)	Sa_MITSUAKI-M5-j7-exp2-colon_SF_245	sfcolon2	10	Sa_MITSUAKI-M5-j7-exp2-colon_PA_245.d	(04/12/17 00:00:00)	Sa_MITSUAKI-M5-j7-exp2-colon_PA_245	pacolon2	131	Sa_MITSUAKI-M5-j7-exp2-colon_BA_245.d	(01/18/17 00:00:00)	Sa_MITSUAKI-M5-j7-exp2-colon_BA_245	bacolon2	217	Sa_MITSUAKI-M5-j7-exp2-colon_GCMRM_245.D	(02/02/17 00:00:00)	Sa_MITSUAKI-M5-j7-exp2-colon_245	gccolon2	131
Nacl-j3-exp2-colon_203	Sa_Nacl-M5-j3-exp2-colon_SF_203b.d	(02/17/17 00:00:00)	Sa_Nacl-M5-j3-exp2-colon_SF_203b	sfcolon2	64	Sa_Nacl-M5-j3-exp2-colon_PA_203.d	(04/12/17 00:00:00)	Sa_Nacl-M5-j3-exp2-colon_PA_203	pacolon2	113	Sa_Nacl-M5-j3-exp2-colon_BA_203.d	(01/18/17 00:00:00)	Sa_Nacl-M5-j3-exp2-colon_BA_203	bacolon2	199	Sa_Nacl-M5-j3-exp2-colon_GCMRM_203.D	(02/02/17 00:00:00)	Sa_Nacl-M5-j3-exp2-colon_203	gccolon2	113
FRAGILIS-j14-exp1-colon_326	Sa_FRAGILIS-M2-j14-exp1-colon_SF_326.d	(02/23/17 00:00:00)	Sa_FRAGILIS-M2-j14-exp1-colon_SF_326	sfcolon1	161	Sa_FRAGILIS-M2-j14-exp1-colon_PA_326.d	(04/12/17 00:00:00)	Sa_FRAGILIS-M2-j14-exp1-colon_PA_326	pacolon1	85	Sa_FRAGILIS-M2-j14-exp1-colon_BA_326.d	(01/18/17 00:00:00)	Sa_FRAGILIS-M2-j14-exp1-colon_BA_326	bacolon1	166	Sa_FRAGILIS-M2-j14-exp1-colon_GCMRM_326.D	(01/27/17 00:00:00)	Sa_FRAGILIS-M2-j14-exp1-colon_326	gccolon1	81
ATB-j3-exp2-colon_207	Sa_ATB-M3-j3-exp2-colon_SF_207b.d	(02/17/17 00:00:00)	Sa_ATB-M3-j3-exp2-colon_SF_207b	sfcolon2	65	Sa_ATB-M3-j3-exp2-colon_PA_207.d	(04/12/17 00:00:00)	Sa_ATB-M3-j3-exp2-colon_PA_207	pacolon2	114	Sa_ATB-M3-j3-exp2-colon_BA_207.d	(01/18/17 00:00:00)	Sa_ATB-M3-j3-exp2-colon_BA_207	bacolon2	200	Sa_ATB-M3-j3-exp2-colon_GCMRM_207.D	(02/02/17 00:00:00)	Sa_ATB-M3-j3-exp2-colon_207	gccolon2	114
BARNECIELA-j3-exp1-colon_278	Sa_BARNECIELA-M2-j3-exp1-colon_SF_278.d	(02/23/17 00:00:00)	Sa_BARNECIELA-M2-j3-exp1-colon_SF_278	sfcolon1	162	Sa_BARNECIELA-M2-j3-exp1-colon_PA_278.d	(04/12/17 00:00:00)	Sa_BARNECIELA-M2-j3-exp1-colon_PA_278	pacolon1	86	Sa_BARNECIELA-M2-j3-exp1-colon_BA_278.d	(01/18/17 00:00:00)	Sa_BARNECIELA-M2-j3-exp1-colon_BA_278	bacolon1	167	Sa_BARNECIELA-M2-j3-exp1-colon_GCMRM_278.D	(01/27/17 00:00:00)	Sa_BARNECIELA-M2-j3-exp1-colon_278	gccolon1	82
MITSUAKI-j14-exp2-colon_261	Sa_MITSUAKI-M3-j14-exp2-colon_SF_261.d	(02/17/17 00:00:00)	Sa_MITSUAKI-M3-j14-exp2-colon_SF_261	sfcolon2	12	Sa_MITSUAKI-M3-j14-exp2-colon_PA_261.d	(04/12/17 00:00:00)	Sa_MITSUAKI-M3-j14-exp2-colon_PA_261	pacolon2	133	Sa_MITSUAKI-M3-j14-exp2-colon_BA_261.d	(01/18/17 00:00:00)	Sa_MITSUAKI-M3-j14-exp2-colon_BA_261	bacolon2	219	Sa_MITSUAKI-M3-j14-exp2-colon_GCMRM_261.D	(02/02/17 00:00:00)	Sa_MITSUAKI-M3-j14-exp2-colon_261	gccolon2	133
MITSUAKI-j3-exp2-colon_219	Sa_MITSUAKI-M3-j3-exp2-colon_SF_219b.d	(02/17/17 00:00:00)	Sa_MITSUAKI-M3-j3-exp2-colon_SF_219b	sfcolon2	66	Sa_MITSUAKI-M3-j3-exp2-colon_PA_219.d	(04/12/17 00:00:00)	Sa_MITSUAKI-M3-j3-exp2-colon_PA_219	pacolon2	115	Sa_MITSUAKI-M3-j3-exp2-colon_BA_219.d	(01/18/17 00:00:00)	Sa_MITSUAKI-M3-j3-exp2-colon_BA_219	bacolon2	201	Sa_MITSUAKI-M3-j3-exp2-colon_GCMRM_219.D	(02/02/17 00:00:00)	Sa_MITSUAKI-M3-j3-exp2-colon_219	gccolon2	115
FRAGILIS-j7-exp1-colon_304	Sa_FRAGILIS-M4-j7-exp1-colon_SF_304.d	(02/23/17 00:00:00)	Sa_FRAGILIS-M4-j7-exp1-colon_SF_304	sfcolon1	163	Sa_FRAGILIS-M4-j7-exp1-colon_PA_304.d	(04/12/17 00:00:00)	Sa_FRAGILIS-M4-j7-exp1-colon_PA_304	pacolon1	87	Sa_FRAGILIS-M4-j7-exp1-colon_BA_304.d	(01/18/17 00:00:00)	Sa_FRAGILIS-M4-j7-exp1-colon_BA_304	bacolon1	168	Sa_FRAGILIS-M4-j7-exp1-colon_GCMRM_304.D	(01/27/17 00:00:00)	Sa_FRAGILIS-M4-j7-exp1-colon_304	gccolon1	83
ATB-j7-exp2-colon_230	Sa_ATB-M2-j7-exp2-colon_SF_230.d	(02/17/17 00:00:00)	Sa_ATB-M2-j7-exp2-colon_SF_230	sfcolon2	13	Sa_ATB-M2-j7-exp2-colon_PA_230.d	(04/12/17 00:00:00)	Sa_ATB-M2-j7-exp2-colon_PA_230	pacolon2	134	Sa_ATB-M2-j7-exp2-colon_BA_230.d	(01/18/17 00:00:00)	Sa_ATB-M2-j7-exp2-colon_BA_230	bacolon2	220	Sa_ATB-M2-j7-exp2-colon_GCMRM_230.D	(02/02/17 00:00:00)	Sa_ATB-M2-j7-exp2-colon_230	gccolon2	134
BURKO-j7-exp2-colon_237	Sa_BURKO-M3-j7-exp2-colon_SF_237b.d	(02/17/17 00:00:00)	Sa_BURKO-M3-j7-exp2-colon_SF_237b	sfcolon2	67	Sa_BURKO-M3-j7-exp2-colon_PA_237.d	(04/12/17 00:00:00)	Sa_BURKO-M3-j7-exp2-colon_PA_237	pacolon2	116	Sa_BURKO-M3-j7-exp2-colon_BA_237.d	(01/18/17 00:00:00)	Sa_BURKO-M3-j7-exp2-colon_BA_237	bacolon2	202	Sa_BURKO-M3-j7-exp2-colon_GCMRM_237.D	(02/02/17 00:00:00)	Sa_BURKO-M3-j7-exp2-colon_237	gccolon2	116
BARNECIELA-j7-exp1-colon_312	Sa_BARNECIELA-M6-j7-exp1-colon_SF_312.d	(02/23/17 00:00:00)	Sa_BARNECIELA-M6-j7-exp1-colon_SF_312	sfcolon1	164	Sa_BARNECIELA-M6-j7-exp1-colon_PA_312.d	(04/12/17 00:00:00)	Sa_BARNECIELA-M6-j7-exp1-colon_PA_312	pacolon1	88	Sa_BARNECIELA-M6-j7-exp1-colon_BA_312.d	(01/18/17 00:00:00)	Sa_BARNECIELA-M6-j7-exp1-colon_BA_312	bacolon1	169	Sa_BARNECIELA-M6-j7-exp1-colon_GCMRM_312.D	(01/27/17 00:00:00)	Sa_BARNECIELA-M6-j7-exp1-colon_312	gccolon1	84
BURKO-j7-exp2-colon_236	Sa_BURKO-M2-j7-exp2-colon_SF_236.d	(02/17/17 00:00:00)	Sa_BURKO-M2-j7-exp2-colon_SF_236	sfcolon2	14	Sa_BURKO-M2-j7-exp2-colon_PA_236.d	(04/12/17 00:00:00)	Sa_BURKO-M2-j7-exp2-colon_PA_236	pacolon2	135	Sa_BURKO-M2-j7-exp2-colon_BA_236.d	(01/18/17 00:00:00)	Sa_BURKO-M2-j7-exp2-colon_BA_236	bacolon2	221	Sa_BURKO-M2-j7-exp2-colon_GCMRM_236.D	(02/02/17 00:00:00)	Sa_BURKO-M2-j7-exp2-colon_236	gccolon2	135
ATB-j7-exp2-colon_231	Sa_ATB-M3-j7-exp2-colon_SF_231b.d	(02/17/17 00:00:00)	Sa_ATB-M3-j7-exp2-colon_SF_231b	sfcolon2	68	Sa_ATB-M3-j7-exp2-colon_PA_231.d	(04/12/17 00:00:00)	Sa_ATB-M3-j7-exp2-colon_PA_231	pacolon2	117	Sa_ATB-M3-j7-exp2-colon_BA_231.d	(01/18/17 00:00:00)	Sa_ATB-M3-j7-exp2-colon_BA_231	bacolon2	203	Sa_ATB-M3-j7-exp2-colon_GCMRM_231.D	(02/02/17 00:00:00)	Sa_ATB-M3-j7-exp2-colon_231	gccolon2	117
Nacl-j7-exp1-colon_284	Sa_Nacl-M2-j7-exp1-colon_SF_284.d	(02/23/17 00:00:00)	Sa_Nacl-M2-j7-exp1-colon_SF_284	sfcolon1	165	Sa_Nacl-M2-j7-exp1-colon_PA_284.d	(04/12/17 00:00:00)	Sa_Nacl-M2-j7-exp1-colon_PA_284	pacolon1	89	Sa_Nacl-M2-j7-exp1-colon_BA_284.d	(01/18/17 00:00:00)	Sa_Nacl-M2-j7-exp1-colon_BA_284	bacolon1	170	Sa_Nacl-M2-j7-exp1-colon_GCMRM_284.D	(01/27/17 00:00:00)	Sa_Nacl-M2-j7-exp1-colon_284	gccolon1	85
Nacl-j7-exp2-colon_224	Sa_Nacl-M2-j7-exp2-colon_SF_224.d	(02/17/17 00:00:00)	Sa_Nacl-M2-j7-exp2-colon_SF_224	sfcolon2	15	Sa_Nacl-M2-j7-exp2-colon_PA_224.d	(04/12/17 00:00:00)	Sa_Nacl-M2-j7-exp2-colon_PA_224	pacolon2	136	Sa_Nacl-M2-j7-exp2-colon_BA_224.d	(01/18/17 00:00:00)	Sa_Nacl-M2-j7-exp2-colon_BA_224	bacolon2	222	Sa_Nacl-M2-j7-exp2-colon_GCMRM_224.D	(02/02/17 00:00:00)	Sa_Nacl-M2-j7-exp2-colon_224	gccolon2	136
MITSUAKI-j14-exp2-colon_262	Sa_MITSUAKI-M4-j14-exp2-colon_SF_262b.d	(02/17/17 00:00:00)	Sa_MITSUAKI-M4-j14-exp2-colon_SF_262b	sfcolon2	69	Sa_MITSUAKI-M4-j14-exp2-colon_PA_262.d	(04/12/17 00:00:00)	Sa_MITSUAKI-M4-j14-exp2-colon_PA_262	pacolon2	118	Sa_MITSUAKI-M4-j14-exp2-colon_BA_262.d	(01/18/17 00:00:00)	Sa_MITSUAKI-M4-j14-exp2-colon_BA_262	bacolon2	204	Sa_MITSUAKI-M4-j14-exp2-colon_GCMRM_262.D	(02/02/17 00:00:00)	Sa_MITSUAKI-M4-j14-exp2-colon_262	gccolon2	118
BARNECIELA-j14-exp1-colon_334	Sa_BARNECIELA-M4-j14-exp1-colon_SF_334.d	(02/23/17 00:00:00)	Sa_BARNECIELA-M4-j14-exp1-colon_SF_334	sfcolon1	166	Sa_BARNECIELA-M4-j14-exp1-colon_PA_334.d	(04/12/17 00:00:00)	Sa_BARNECIELA-M4-j14-exp1-colon_PA_334	pacolon1	90	Sa_BARNECIELA-M4-j14-exp1-colon_BA_334.d	(01/18/17 00:00:00)	Sa_BARNECIELA-M4-j14-exp1-colon_BA_334	bacolon1	171	Sa_BARNECIELA-M4-j14-exp1-colon_GCMRM_334.D	(01/27/17 00:00:00)	Sa_BARNECIELA-M4-j14-exp1-colon_334	gccolon1	86
ATB-j7-exp2-colon_233	Sa_ATB-M5-j7-exp2-colon_SF_233.d	(02/17/17 00:00:00)	Sa_ATB-M5-j7-exp2-colon_SF_233	sfcolon2	16	Sa_ATB-M5-j7-exp2-colon_PA_233.d	(04/12/17 00:00:00)	Sa_ATB-M5-j7-exp2-colon_PA_233	pacolon2	137	Sa_ATB-M5-j7-exp2-colon_BA_233.d	(01/18/17 00:00:00)	Sa_ATB-M5-j7-exp2-colon_BA_233	bacolon2	223	Sa_ATB-M5-j7-exp2-colon_GCMRM_233.D	(02/02/17 00:00:00)	Sa_ATB-M5-j7-exp2-colon_233	gccolon2	137
BURKO-j14-exp2-colon_256	Sa_BURKO-M4-j14-exp2-colon_SF_256b.d	(02/17/17 00:00:00)	Sa_BURKO-M4-j14-exp2-colon_SF_256b	sfcolon2	70	Sa_BURKO-M4-j14-exp2-colon_PA_256.d	(04/12/17 00:00:00)	Sa_BURKO-M4-j14-exp2-colon_PA_256	pacolon2	119	Sa_BURKO-M4-j14-exp2-colon_BA_256.d	(01/18/17 00:00:00)	Sa_BURKO-M4-j14-exp2-colon_BA_256	bacolon2	205	Sa_BURKO-M4-j14-exp2-colon_GCMRM_256.D	(02/02/17 00:00:00)	Sa_BURKO-M4-j14-exp2-colon_256	gccolon2	119
BURKO-j3-exp2-colon_212	Sa_BURKO-M2-j3-exp2-colon_SF_212.d	(02/17/17 00:00:00)	Sa_BURKO-M2-j3-exp2-colon_SF_212	sfcolon2	17	Sa_BURKO-M2-j3-exp2-colon_PA_212.d	(04/12/17 00:00:00)	Sa_BURKO-M2-j3-exp2-colon_PA_212	pacolon2	138	Sa_BURKO-M2-j3-exp2-colon_BA_212.d	(01/18/17 00:00:00)	Sa_BURKO-M2-j3-exp2-colon_BA_212	bacolon2	224	Sa_BURKO-M2-j3-exp2-colon_GCMRM_212.D	(02/02/17 00:00:00)	Sa_BURKO-M2-j3-exp2-colon_212	gccolon2	138
ATB-j14-exp2-colon_250	Sa_ATB-M4-j14-exp2-colon_SF_250b.d	(02/17/17 00:00:00)	Sa_ATB-M4-j14-exp2-colon_SF_250b	sfcolon2	71	Sa_ATB-M4-j14-exp2-colon_PA_250.d	(04/12/17 00:00:00)	Sa_ATB-M4-j14-exp2-colon_PA_250	pacolon2	120	Sa_ATB-M4-j14-exp2-colon_BA_250.d	(01/18/17 00:00:00)	Sa_ATB-M4-j14-exp2-colon_BA_250	bacolon2	206	Sa_ATB-M4-j14-exp2-colon_GCMRM_250.D	(02/02/17 00:00:00)	Sa_ATB-M4-j14-exp2-colon_250	gccolon2	120
ATB-j3-exp1-colon_264	Sa_ATB-M6-j3-exp1-colon_SF_264.d	(02/23/17 00:00:00)	Sa_ATB-M6-j3-exp1-colon_SF_264	sfcolon1	167	Sa_ATB-M6-j3-exp1-colon_PA_264.d	(04/12/17 00:00:00)	Sa_ATB-M6-j3-exp1-colon_PA_264	pacolon1	91	Sa_ATB-M6-j3-exp1-colon_BA_264.d	(01/18/17 00:00:00)	Sa_ATB-M6-j3-exp1-colon_BA_264	bacolon1	172	Sa_ATB-M6-j3-exp1-colon_GCMRM_264.D	(01/27/17 00:00:00)	Sa_ATB-M6-j3-exp1-colon_264	gccolon1	88
Nacl-j3-exp2-colon_202	Sa_Nacl-M4-j3-exp2-colon_SF_202.d	(02/17/17 00:00:00)	Sa_Nacl-M4-j3-exp2-colon_SF_202	sfcolon2	18	Sa_Nacl-M4-j3-exp2-colon_PA_202.d	(04/12/17 00:00:00)	Sa_Nacl-M4-j3-exp2-colon_PA_202	pacolon2	139	Sa_Nacl-M4-j3-exp2-colon_BA_202.d	(01/18/17 00:00:00)	Sa_Nacl-M4-j3-exp2-colon_BA_202	bacolon2	225	Sa_Nacl-M4-j3-exp2-colon_GCMRM_202.D	(02/02/17 00:00:00)	Sa_Nacl-M4-j3-exp2-colon_202	gccolon2	139
Nacl-j7-exp2-colon_225	Sa_Nacl-M3-j7-exp2-colon_SF_225b.d	(02/17/17 00:00:00)	Sa_Nacl-M3-j7-exp2-colon_SF_225b	sfcolon2	72	Sa_Nacl-M3-j7-exp2-colon_PA_225.d	(04/12/17 00:00:00)	Sa_Nacl-M3-j7-exp2-colon_PA_225	pacolon2	121	Sa_Nacl-M3-j7-exp2-colon_BA_225.d	(01/18/17 00:00:00)	Sa_Nacl-M3-j7-exp2-colon_BA_225	bacolon2	207	Sa_Nacl-M3-j7-exp2-colon_GCMRM_225.D	(02/02/17 00:00:00)	Sa_Nacl-M3-j7-exp2-colon_225	gccolon2	121
HIRAE-j14-exp1-colon_322	Sa_HIRAE-M4-j14-exp1-colon_SF_322.d	(02/23/17 00:00:00)	Sa_HIRAE-M4-j14-exp1-colon_SF_322	sfcolon1	169	Sa_HIRAE-M4-j14-exp1-colon_PA_322.d	(04/12/17 00:00:00)	Sa_HIRAE-M4-j14-exp1-colon_PA_322	pacolon1	92	Sa_HIRAE-M4-j14-exp1-colon_BA_322.d	(01/18/17 00:00:00)	Sa_HIRAE-M4-j14-exp1-colon_BA_322	bacolon1	174	Sa_HIRAE-M4-j14-exp1-colon_GCMRM_322.D	(01/27/17 00:00:00)	Sa_HIRAE-M4-j14-exp1-colon_322	gccolon1	90
MITSUAKI-j3-exp2-colon_218	Sa_MITSUAKI-M2-j3-exp2-colon_SF_218.d	(02/17/17 00:00:00)	Sa_MITSUAKI-M2-j3-exp2-colon_SF_218	sfcolon2	19	Sa_MITSUAKI-M2-j3-exp2-colon_PA_218.d	(04/12/17 00:00:00)	Sa_MITSUAKI-M2-j3-exp2-colon_PA_218	pacolon2	140	Sa_MITSUAKI-M2-j3-exp2-colon_BA_218.d	(01/18/17 00:00:00)	Sa_MITSUAKI-M2-j3-exp2-colon_BA_218	bacolon2	226	Sa_MITSUAKI-M2-j3-exp2-colon_GCMRM_218.D	(02/02/17 00:00:00)	Sa_MITSUAKI-M2-j3-exp2-colon_218	gccolon2	140
ATB-j3-exp2-colon_206	Sa_ATB-M2-j3-exp2-colon_SF_206b.d	(02/17/17 00:00:00)	Sa_ATB-M2-j3-exp2-colon_SF_206b	sfcolon2	73	Sa_ATB-M2-j3-exp2-colon_PA_206.d	(04/12/17 00:00:00)	Sa_ATB-M2-j3-exp2-colon_PA_206	pacolon2	123	Sa_ATB-M2-j3-exp2-colon_BA_206.d	(01/18/17 00:00:00)	Sa_ATB-M2-j3-exp2-colon_BA_206	bacolon2	209	Sa_ATB-M2-j3-exp2-colon_GCMRM_206.D	(02/02/17 00:00:00)	Sa_ATB-M2-j3-exp2-colon_206	gccolon2	123
BURKO-j7-exp2-colon_240	Sa_BURKO-M6-j7-exp2-colon_SF_240.d	(02/17/17 00:00:00)	Sa_BURKO-M6-j7-exp2-colon_SF_240	sfcolon2	20	Sa_BURKO-M6-j7-exp2-colon_PA_240.d	(04/12/17 00:00:00)	Sa_BURKO-M6-j7-exp2-colon_PA_240	pacolon2	141	Sa_BURKO-M6-j7-exp2-colon_BA_240.d	(01/18/17 00:00:00)	Sa_BURKO-M6-j7-exp2-colon_BA_240	bacolon2	227	Sa_BURKO-M6-j7-exp2-colon_GCMRM_240.D	(02/02/17 00:00:00)	Sa_BURKO-M6-j7-exp2-colon_240	gccolon2	141
BURKO-j14-exp2-colon_255	Sa_BURKO-M3-j14-exp2-colon_SF_255b.d	(02/17/17 00:00:00)	Sa_BURKO-M3-j14-exp2-colon_SF_255b	sfcolon2	74	Sa_BURKO-M3-j14-exp2-colon_PA_255.d	(04/12/17 00:00:00)	Sa_BURKO-M3-j14-exp2-colon_PA_255	pacolon2	124	Sa_BURKO-M3-j14-exp2-colon_BA_255.d	(01/18/17 00:00:00)	Sa_BURKO-M3-j14-exp2-colon_BA_255	bacolon2	210	Sa_BURKO-M3-j14-exp2-colon_GCMRM_255.D	(02/02/17 00:00:00)	Sa_BURKO-M3-j14-exp2-colon_255	gccolon2	124
ATB-j14-exp2-colon_248	Sa_ATB-M2-j14-exp2-colon_SF_248.d	(02/17/17 00:00:00)	Sa_ATB-M2-j14-exp2-colon_SF_248	sfcolon2	21	Sa_ATB-M2-j14-exp2-colon_PA_248.d	(04/12/17 00:00:00)	Sa_ATB-M2-j14-exp2-colon_PA_248	pacolon2	142	Sa_ATB-M2-j14-exp2-colon_BA_248.d	(01/18/17 00:00:00)	Sa_ATB-M2-j14-exp2-colon_BA_248	bacolon2	228	Sa_ATB-M2-j14-exp2-colon_GCMRM_248.D	(02/02/17 00:00:00)	Sa_ATB-M2-j14-exp2-colon_248	gccolon2	142
Nacl-j3-exp3-colon_201	Sa_Nacl-M3-j3-exp3-colon_SF_201.d	(02/23/17 00:00:00)	Sa_Nacl-M3-j3-exp3-colon_SF_201	sfcolon3	176	Sa_Nacl-M3-j3-exp3-colon_PA_201.d	(04/15/17 00:00:00)	Sa_Nacl-M3-j3-exp3-colon_PA_201	pacolon3	177	Sa_Nacl-M3-j3-exp3-colon_BA_201.d	(01/15/17 00:00:00)	Sa_Nacl-M3-j3-exp3-colon_BA_201	bacolon3	6	Sa_Nacl-M3-j3-exp3-colon_GCMRM_201.D	(02/08/17 00:00:00)	Sa_Nacl-M3-j3-exp3-colon_201	gccolon3	177
FECES-j3-exp3-colon_214	Sa_FECES-M4-j3-exp3-colon_SF_214.d	(02/23/17 00:00:00)	Sa_FECES-M4-j3-exp3-colon_SF_214	sfcolon3	177	Sa_FECES-M4-j3-exp3-colon_PA_214.d	(04/15/17 00:00:00)	Sa_FECES-M4-j3-exp3-colon_PA_214	pacolon3	178	Sa_FECES-M4-j3-exp3-colon_BA_214.d	(01/15/17 00:00:00)	Sa_FECES-M4-j3-exp3-colon_BA_214	bacolon3	7	Sa_FECES-M4-j3-exp3-colon_GCMRM_214.D	(02/08/17 00:00:00)	Sa_FECES-M4-j3-exp3-colon_214	gccolon3	178
MITSUAKI-j7-exp2-colon_242	Sa_MITSUAKI-M2-j7-exp2-colon_SF_242.d	(02/17/17 00:00:00)	Sa_MITSUAKI-M2-j7-exp2-colon_SF_242	sfcolon2	23	Sa_MITSUAKI-M2-j7-exp2-colon_PA_242.d	(04/12/17 00:00:00)	Sa_MITSUAKI-M2-j7-exp2-colon_PA_242	pacolon2	144	Sa_MITSUAKI-M2-j7-exp2-colon_BA_242.d	(01/18/17 00:00:00)	Sa_MITSUAKI-M2-j7-exp2-colon_BA_242	bacolon2	230	Sa_MITSUAKI-M2-j7-exp2-colon_GCMRM_242.D	(02/02/17 00:00:00)	Sa_MITSUAKI-M2-j7-exp2-colon_242	gccolon2	144
ATB-j14-exp2-colon_249	Sa_ATB-M3-j14-exp2-colon_SF_249.d	(02/17/17 00:00:00)	Sa_ATB-M3-j14-exp2-colon_SF_249	sfcolon2	24	Sa_ATB-M3-j14-exp2-colon_PA_249.d	(04/12/17 00:00:00)	Sa_ATB-M3-j14-exp2-colon_PA_249	pacolon2	145	Sa_ATB-M3-j14-exp2-colon_BA_249.d	(01/18/17 00:00:00)	Sa_ATB-M3-j14-exp2-colon_BA_249	bacolon2	231	Sa_ATB-M3-j14-exp2-colon_GCMRM_249.D	(02/02/17 00:00:00)	Sa_ATB-M3-j14-exp2-colon_249	gccolon2	145
AKKERMANSIA-j14-exp3-colon_261	Sa_AKKERMANSIA-M3-j14-exp3-colon_SF_261.d	(02/23/17 00:00:00)	Sa_AKKERMANSIA-M3-j14-exp3-colon_SF_261	sfcolon3	178	Sa_AKKERMANSIA-M3-j14-exp3-colon_PA_261.d	(04/15/17 00:00:00)	Sa_AKKERMANSIA-M3-j14-exp3-colon_PA_261	pacolon3	180	Sa_AKKERMANSIA-M3-j14-exp3-colon_BA_261.d	(01/15/17 00:00:00)	Sa_AKKERMANSIA-M3-j14-exp3-colon_BA_261	bacolon3	9	Sa_AKKERMANSIA-M3-j14-exp3-colon_GCMRM_261.D	(02/08/17 00:00:00)	Sa_AKKERMANSIA-M3-j14-exp3-colon_261	gccolon3	180
BURKO-j14-exp2-colon_254	Sa_BURKO-M2-j14-exp2-colon_SF_254.d	(02/17/17 00:00:00)	Sa_BURKO-M2-j14-exp2-colon_SF_254	sfcolon2	25	Sa_BURKO-M2-j14-exp2-colon_PA_254.d	(04/12/17 00:00:00)	Sa_BURKO-M2-j14-exp2-colon_PA_254	pacolon2	146	Sa_BURKO-M2-j14-exp2-colon_BA_254.d	(01/18/17 00:00:00)	Sa_BURKO-M2-j14-exp2-colon_BA_254	bacolon2	232	Sa_BURKO-M2-j14-exp2-colon_GCMRM_254.D	(02/02/17 00:00:00)	Sa_BURKO-M2-j14-exp2-colon_254	gccolon2	146
Nacl-j7-exp3-colon_225	Sa_Nacl-M3-j7-exp3-colon_SF_225.d	(02/23/17 00:00:00)	Sa_Nacl-M3-j7-exp3-colon_SF_225	sfcolon3	179	Sa_Nacl-M3-j7-exp3-colon_PA_225.d	(04/15/17 00:00:00)	Sa_Nacl-M3-j7-exp3-colon_PA_225	pacolon3	181	Sa_Nacl-M3-j7-exp3-colon_BA_225.d	(01/15/17 00:00:00)	Sa_Nacl-M3-j7-exp3-colon_BA_225	bacolon3	10	Sa_Nacl-M3-j7-exp3-colon_GCMRM_225.D	(02/08/17 00:00:00)	Sa_Nacl-M3-j7-exp3-colon_225	gccolon3	181
MITSUAKI-j14-exp2-colon_260	Sa_MITSUAKI-M2-j14-exp2-colon_SF_260.d	(02/17/17 00:00:00)	Sa_MITSUAKI-M2-j14-exp2-colon_SF_260	sfcolon2	26	Sa_MITSUAKI-M2-j14-exp2-colon_PA_260.d	(04/12/17 00:00:00)	Sa_MITSUAKI-M2-j14-exp2-colon_PA_260	pacolon2	147	Sa_MITSUAKI-M2-j14-exp2-colon_BA_260.d	(01/18/17 00:00:00)	Sa_MITSUAKI-M2-j14-exp2-colon_BA_260	bacolon2	233	Sa_MITSUAKI-M2-j14-exp2-colon_GCMRM_260.D	(02/02/17 00:00:00)	Sa_MITSUAKI-M2-j14-exp2-colon_260	gccolon2	147
ATB-j3-exp3-colon_207	Sa_ATB-M3-j3-exp3-colon_SF_207.d	(02/23/17 00:00:00)	Sa_ATB-M3-j3-exp3-colon_SF_207	sfcolon3	180	Sa_ATB-M3-j3-exp3-colon_PA_207.d	(04/15/17 00:00:00)	Sa_ATB-M3-j3-exp3-colon_PA_207	pacolon3	182	Sa_ATB-M3-j3-exp3-colon_BA_207.d	(01/15/17 00:00:00)	Sa_ATB-M3-j3-exp3-colon_BA_207	bacolon3	11	Sa_ATB-M3-j3-exp3-colon_GCMRM_207.D	(02/08/17 00:00:00)	Sa_ATB-M3-j3-exp3-colon_207	gccolon3	182
ATB-j3-exp2-colon_209	Sa_ATB-M5-j3-exp2-colon_SF_209.d	(02/17/17 00:00:00)	Sa_ATB-M5-j3-exp2-colon_SF_209	sfcolon2	27	Sa_ATB-M5-j3-exp2-colon_PA_209.d	(04/12/17 00:00:00)	Sa_ATB-M5-j3-exp2-colon_PA_209	pacolon2	148	Sa_ATB-M5-j3-exp2-colon_BA_209.d	(01/18/17 00:00:00)	Sa_ATB-M5-j3-exp2-colon_BA_209	bacolon2	234	Sa_ATB-M5-j3-exp2-colon_GCMRM_209.D	(02/02/17 00:00:00)	Sa_ATB-M5-j3-exp2-colon_209	gccolon2	148
FECES-j7-exp3-colon_238	Sa_FECES-M4-j7-exp3-colon_SF_238.d	(02/23/17 00:00:00)	Sa_FECES-M4-j7-exp3-colon_SF_238	sfcolon3	181	Sa_FECES-M4-j7-exp3-colon_PA_238.d	(04/15/17 00:00:00)	Sa_FECES-M4-j7-exp3-colon_PA_238	pacolon3	183	Sa_FECES-M4-j7-exp3-colon_BA_238.d	(01/15/17 00:00:00)	Sa_FECES-M4-j7-exp3-colon_BA_238	bacolon3	12	Sa_FECES-M4-j7-exp3-colon_GCMRM_238.D	(02/08/17 00:00:00)	Sa_FECES-M4-j7-exp3-colon_238	gccolon3	183
BURKO-j7-exp2-colon_235	Sa_BURKO-M1-j7-exp2-colon_SF_235.d	(02/17/17 00:00:00)	Sa_BURKO-M1-j7-exp2-colon_SF_235	sfcolon2	28	Sa_BURKO-M1-j7-exp2-colon_PA_235.d	(04/12/17 00:00:00)	Sa_BURKO-M1-j7-exp2-colon_PA_235	pacolon2	149	Sa_BURKO-M1-j7-exp2-colon_BA_235.d	(01/18/17 00:00:00)	Sa_BURKO-M1-j7-exp2-colon_BA_235	bacolon2	235	Sa_BURKO-M1-j7-exp2-colon_GCMRM_235.D	(02/02/17 00:00:00)	Sa_BURKO-M1-j7-exp2-colon_235	gccolon2	149
AKKERMANSIA-j3-exp3-colon_220	Sa_AKKERMANSIA-M4-j3-exp3-colon_SF_220.d	(02/23/17 00:00:00)	Sa_AKKERMANSIA-M4-j3-exp3-colon_SF_220	sfcolon3	182	Sa_AKKERMANSIA-M4-j3-exp3-colon_PA_220.d	(04/15/17 00:00:00)	Sa_AKKERMANSIA-M4-j3-exp3-colon_PA_220	pacolon3	184	Sa_AKKERMANSIA-M4-j3-exp3-colon_BA_220.d	(01/15/17 00:00:00)	Sa_AKKERMANSIA-M4-j3-exp3-colon_BA_220	bacolon3	13	Sa_AKKERMANSIA-M4-j3-exp3-colon_GCMRM_220.D	(02/08/17 00:00:00)	Sa_AKKERMANSIA-M4-j3-exp3-colon_220	gccolon3	184
ATB-j7-exp2-colon_234	Sa_ATB-M6-j7-exp2-colon_SF_234.d	(02/17/17 00:00:00)	Sa_ATB-M6-j7-exp2-colon_SF_234	sfcolon2	29	Sa_ATB-M6-j7-exp2-colon_PA_234.d	(04/12/17 00:00:00)	Sa_ATB-M6-j7-exp2-colon_PA_234	pacolon2	150	Sa_ATB-M6-j7-exp2-colon_BA_234.d	(01/18/17 00:00:00)	Sa_ATB-M6-j7-exp2-colon_BA_234	bacolon2	236	Sa_ATB-M6-j7-exp2-colon_GCMRM_234.D	(02/02/17 00:00:00)	Sa_ATB-M6-j7-exp2-colon_234	gccolon2	150
ATB-j14-exp3-colon_248	Sa_ATB-M2-j14-exp3-colon_SF_248.d	(02/23/17 00:00:00)	Sa_ATB-M2-j14-exp3-colon_SF_248	sfcolon3	183	Sa_ATB-M2-j14-exp3-colon_PA_248.d	(04/15/17 00:00:00)	Sa_ATB-M2-j14-exp3-colon_PA_248	pacolon3	185	Sa_ATB-M2-j14-exp3-colon_BA_248.d	(01/15/17 00:00:00)	Sa_ATB-M2-j14-exp3-colon_BA_248	bacolon3	14	Sa_ATB-M2-j14-exp3-colon_GCMRM_248.D	(02/08/17 00:00:00)	Sa_ATB-M2-j14-exp3-colon_248	gccolon3	185
Nacl-j7-exp2-colon_223	Sa_Nacl-M1-j7-exp2-colon_SF_223.d	(02/17/17 00:00:00)	Sa_Nacl-M1-j7-exp2-colon_SF_223	sfcolon2	30	Sa_Nacl-M1-j7-exp2-colon_PA_223.d	(04/12/17 00:00:00)	Sa_Nacl-M1-j7-exp2-colon_PA_223	pacolon2	151	Sa_Nacl-M1-j7-exp2-colon_BA_223.d	(01/18/17 00:00:00)	Sa_Nacl-M1-j7-exp2-colon_BA_223	bacolon2	237	Sa_Nacl-M1-j7-exp2-colon_GCMRM_223.D	(02/02/17 00:00:00)	Sa_Nacl-M1-j7-exp2-colon_223	gccolon2	151
FECES-j14-exp3-colon_257	Sa_FECES-M5-j14-exp3-colon_SF_257.d	(02/23/17 00:00:00)	Sa_FECES-M5-j14-exp3-colon_SF_257	sfcolon3	184	Sa_FECES-M5-j14-exp3-colon_PA_257.d	(04/15/17 00:00:00)	Sa_FECES-M5-j14-exp3-colon_PA_257	pacolon3	186	Sa_FECES-M5-j14-exp3-colon_BA_257.d	(01/15/17 00:00:00)	Sa_FECES-M5-j14-exp3-colon_BA_257	bacolon3	15	Sa_FECES-M5-j14-exp3-colon_GCMRM_257.D	(02/08/17 00:00:00)	Sa_FECES-M5-j14-exp3-colon_257	gccolon3	186
BURKO-j3-exp2-colon_211	Sa_BURKO-M1-j3-exp2-colon_SF_211.d	(02/17/17 00:00:00)	Sa_BURKO-M1-j3-exp2-colon_SF_211	sfcolon2	31	Sa_BURKO-M1-j3-exp2-colon_PA_211.d	(04/12/17 00:00:00)	Sa_BURKO-M1-j3-exp2-colon_PA_211	pacolon2	152	Sa_BURKO-M1-j3-exp2-colon_BA_211.d	(01/18/17 00:00:00)	Sa_BURKO-M1-j3-exp2-colon_BA_211	bacolon2	238	Sa_BURKO-M1-j3-exp2-colon_GCMRM_211.D	(02/02/17 00:00:00)	Sa_BURKO-M1-j3-exp2-colon_211	gccolon2	152
Nacl-j3-exp2-colon_199	Sa_Nacl-M1-j3-exp2-colon_SF_199.d	(02/17/17 00:00:00)	Sa_Nacl-M1-j3-exp2-colon_SF_199	sfcolon2	32	Sa_Nacl-M1-j3-exp2-colon_PA_199.d	(04/12/17 00:00:00)	Sa_Nacl-M1-j3-exp2-colon_PA_199	pacolon2	153	Sa_Nacl-M1-j3-exp2-colon_BA_199.d	(01/18/17 00:00:00)	Sa_Nacl-M1-j3-exp2-colon_BA_199	bacolon2	239	Sa_Nacl-M1-j3-exp2-colon_GCMRM_199.D	(02/02/17 00:00:00)	Sa_Nacl-M1-j3-exp2-colon_199	gccolon2	153
Nacl-j3-exp3-colon_203	Sa_Nacl-M5-j3-exp3-colon_SF_203.d	(02/23/17 00:00:00)	Sa_Nacl-M5-j3-exp3-colon_SF_203	sfcolon3	186	Sa_Nacl-M5-j3-exp3-colon_PA_203.d	(04/15/17 00:00:00)	Sa_Nacl-M5-j3-exp3-colon_PA_203	pacolon3	188	Sa_Nacl-M5-j3-exp3-colon_BA_203.d	(01/15/17 00:00:00)	Sa_Nacl-M5-j3-exp3-colon_BA_203	bacolon3	17	Sa_Nacl-M5-j3-exp3-colon_GCMRM_203.D	(02/08/17 00:00:00)	Sa_Nacl-M5-j3-exp3-colon_203	gccolon3	188
ATB-j3-exp2-colon_205	Sa_ATB-M1-j3-exp2-colon_SF_205.d	(02/17/17 00:00:00)	Sa_ATB-M1-j3-exp2-colon_SF_205	sfcolon2	33	Sa_ATB-M1-j3-exp2-colon_PA_205.d	(04/12/17 00:00:00)	Sa_ATB-M1-j3-exp2-colon_PA_205	pacolon2	154	Sa_ATB-M1-j3-exp2-colon_BA_205.d	(01/18/17 00:00:00)	Sa_ATB-M1-j3-exp2-colon_BA_205	bacolon2	240	Sa_ATB-M1-j3-exp2-colon_GCMRM_205.D	(02/02/17 00:00:00)	Sa_ATB-M1-j3-exp2-colon_205	gccolon2	154
AKKERMANSIA-j7-exp3-colon_241	Sa_AKKERMANSIA-M1-j7-exp3-colon_SF_241.d	(02/23/17 00:00:00)	Sa_AKKERMANSIA-M1-j7-exp3-colon_SF_241	sfcolon3	187	Sa_AKKERMANSIA-M1-j7-exp3-colon_PA_241.d	(04/15/17 00:00:00)	Sa_AKKERMANSIA-M1-j7-exp3-colon_PA_241	pacolon3	189	Sa_AKKERMANSIA-M1-j7-exp3-colon_BA_241.d	(01/15/17 00:00:00)	Sa_AKKERMANSIA-M1-j7-exp3-colon_BA_241	bacolon3	18	Sa_AKKERMANSIA-M1-j7-exp3-colon_GCMRM_241.D	(02/08/17 00:00:00)	Sa_AKKERMANSIA-M1-j7-exp3-colon_241	gccolon3	189
MITSUAKI-j3-exp2-colon_217	Sa_MITSUAKI-M1-j3-exp2-colon_SF_217.d	(02/17/17 00:00:00)	Sa_MITSUAKI-M1-j3-exp2-colon_SF_217	sfcolon2	34	Sa_MITSUAKI-M1-j3-exp2-colon_PA_217.d	(04/12/17 00:00:00)	Sa_MITSUAKI-M1-j3-exp2-colon_PA_217	pacolon2	155	Sa_MITSUAKI-M1-j3-exp2-colon_BA_217.d	(01/18/17 00:00:00)	Sa_MITSUAKI-M1-j3-exp2-colon_BA_217	bacolon2	241	Sa_MITSUAKI-M1-j3-exp2-colon_GCMRM_217.D	(02/02/17 00:00:00)	Sa_MITSUAKI-M1-j3-exp2-colon_217	gccolon2	155
FECES-j7-exp3-colon_235	Sa_FECES-M1-j7-exp3-colon_SF_235.d	(02/23/17 00:00:00)	Sa_FECES-M1-j7-exp3-colon_SF_235	sfcolon3	188	Sa_FECES-M1-j7-exp3-colon_PA_235.d	(04/15/17 00:00:00)	Sa_FECES-M1-j7-exp3-colon_PA_235	pacolon3	190	Sa_FECES-M1-j7-exp3-colon_BA_235.d	(01/15/17 00:00:00)	Sa_FECES-M1-j7-exp3-colon_BA_235	bacolon3	19	Sa_FECES-M1-j7-exp3-colon_GCMRM_235.D	(02/08/17 00:00:00)	Sa_FECES-M1-j7-exp3-colon_235	gccolon3	190
ATB-j3-exp3-colon_206	Sa_ATB-M2-j3-exp3-colon_SF_206.d	(02/23/17 00:00:00)	Sa_ATB-M2-j3-exp3-colon_SF_206	sfcolon3	189	Sa_ATB-M2-j3-exp3-colon_PA_206.d	(04/15/17 00:00:00)	Sa_ATB-M2-j3-exp3-colon_PA_206	pacolon3	191	Sa_ATB-M2-j3-exp3-colon_BA_206.d	(01/15/17 00:00:00)	Sa_ATB-M2-j3-exp3-colon_BA_206	bacolon3	20	Sa_ATB-M2-j3-exp3-colon_GCMRM_206.D	(02/08/17 00:00:00)	Sa_ATB-M2-j3-exp3-colon_206	gccolon3	191
ATB-j7-exp2-colon_229	Sa_ATB-M1-j7-exp2-colon_SF_229.d	(02/17/17 00:00:00)	Sa_ATB-M1-j7-exp2-colon_SF_229	sfcolon2	36	Sa_ATB-M1-j7-exp2-colon_PA_229.d	(04/12/17 00:00:00)	Sa_ATB-M1-j7-exp2-colon_PA_229	pacolon2	157	Sa_ATB-M1-j7-exp2-colon_BA_229.d	(01/18/17 00:00:00)	Sa_ATB-M1-j7-exp2-colon_BA_229	bacolon2	243	Sa_ATB-M1-j7-exp2-colon_GCMRM_229.D	(02/02/17 00:00:00)	Sa_ATB-M1-j7-exp2-colon_229	gccolon2	157
AKKERMANSIA-j14-exp3-colon_263	Sa_AKKERMANSIA-M5-j14-exp3-colon_SF_263.d	(02/23/17 00:00:00)	Sa_AKKERMANSIA-M5-j14-exp3-colon_SF_263	sfcolon3	190	Sa_AKKERMANSIA-M5-j14-exp3-colon_PA_263.d	(04/15/17 00:00:00)	Sa_AKKERMANSIA-M5-j14-exp3-colon_PA_263	pacolon3	192	Sa_AKKERMANSIA-M5-j14-exp3-colon_BA_263.d	(01/15/17 00:00:00)	Sa_AKKERMANSIA-M5-j14-exp3-colon_BA_263	bacolon3	21	Sa_AKKERMANSIA-M5-j14-exp3-colon_GCMRM_263.D	(02/08/17 00:00:00)	Sa_AKKERMANSIA-M5-j14-exp3-colon_263	gccolon3	192
BURKO-j14-exp2-colon_253	Sa_BURKO-M1-j14-exp2-colon_SF_253.d	(02/17/17 00:00:00)	Sa_BURKO-M1-j14-exp2-colon_SF_253	sfcolon2	37	Sa_BURKO-M1-j14-exp2-colon_PA_253.d	(04/12/17 00:00:00)	Sa_BURKO-M1-j14-exp2-colon_PA_253	pacolon2	158	Sa_BURKO-M1-j14-exp2-colon_BA_253.d	(01/18/17 00:00:00)	Sa_BURKO-M1-j14-exp2-colon_BA_253	bacolon2	244	Sa_BURKO-M1-j14-exp2-colon_GCMRM_253.D	(02/02/17 00:00:00)	Sa_BURKO-M1-j14-exp2-colon_253	gccolon2	158
Nacl-j7-exp3-colon_224	Sa_Nacl-M2-j7-exp3-colon_SF_224.d	(02/23/17 00:00:00)	Sa_Nacl-M2-j7-exp3-colon_SF_224	sfcolon3	191	Sa_Nacl-M2-j7-exp3-colon_PA_224.d	(04/15/17 00:00:00)	Sa_Nacl-M2-j7-exp3-colon_PA_224	pacolon3	193	Sa_Nacl-M2-j7-exp3-colon_BA_224.d	(01/15/17 00:00:00)	Sa_Nacl-M2-j7-exp3-colon_BA_224	bacolon3	22	Sa_Nacl-M2-j7-exp3-colon_GCMRM_224.D	(02/08/17 00:00:00)	Sa_Nacl-M2-j7-exp3-colon_224	gccolon3	193
Nacl-j3-exp2-colon_204	Sa_Nacl-M6-j3-exp2-colon_SF_204.d	(02/17/17 00:00:00)	Sa_Nacl-M6-j3-exp2-colon_SF_204	sfcolon2	38	Sa_Nacl-M6-j3-exp2-colon_PA_204.d	(04/12/17 00:00:00)	Sa_Nacl-M6-j3-exp2-colon_PA_204	pacolon2	159	Sa_Nacl-M6-j3-exp2-colon_BA_204.d	(01/18/17 00:00:00)	Sa_Nacl-M6-j3-exp2-colon_BA_204	bacolon2	245	Sa_Nacl-M6-j3-exp2-colon_GCMRM_204.D	(02/02/17 00:00:00)	Sa_Nacl-M6-j3-exp2-colon_204	gccolon2	159
FECES-j3-exp3-colon_212	Sa_FECES-M2-j3-exp3-colon_SF_212.d	(02/23/17 00:00:00)	Sa_FECES-M2-j3-exp3-colon_SF_212	sfcolon3	192	Sa_FECES-M2-j3-exp3-colon_PA_212.d	(04/15/17 00:00:00)	Sa_FECES-M2-j3-exp3-colon_PA_212	pacolon3	194	Sa_FECES-M2-j3-exp3-colon_BA_212.d	(01/15/17 00:00:00)	Sa_FECES-M2-j3-exp3-colon_BA_212	bacolon3	23	Sa_FECES-M2-j3-exp3-colon_GCMRM_212.D	(02/08/17 00:00:00)	Sa_FECES-M2-j3-exp3-colon_212	gccolon3	194
ATB-j14-exp2-colon_252	Sa_ATB-M6-j14-exp2-colon_SF_252.d	(02/17/17 00:00:00)	Sa_ATB-M6-j14-exp2-colon_SF_252	sfcolon2	39	Sa_ATB-M6-j14-exp2-colon_PA_252.d	(04/12/17 00:00:00)	Sa_ATB-M6-j14-exp2-colon_PA_252	pacolon2	160	Sa_ATB-M6-j14-exp2-colon_BA_252.d	(01/18/17 00:00:00)	Sa_ATB-M6-j14-exp2-colon_BA_252	bacolon2	246	Sa_ATB-M6-j14-exp2-colon_GCMRM_252.D	(02/02/17 00:00:00)	Sa_ATB-M6-j14-exp2-colon_252	gccolon2	160
AKKERMANSIA-j3-exp3-colon_218	Sa_AKKERMANSIA-M2-j3-exp3-colon_SF_218.d	(02/23/17 00:00:00)	Sa_AKKERMANSIA-M2-j3-exp3-colon_SF_218	sfcolon3	193	Sa_AKKERMANSIA-M2-j3-exp3-colon_PA_218.d	(04/15/17 00:00:00)	Sa_AKKERMANSIA-M2-j3-exp3-colon_PA_218	pacolon3	195	Sa_AKKERMANSIA-M2-j3-exp3-colon_BA_218.d	(01/15/17 00:00:00)	Sa_AKKERMANSIA-M2-j3-exp3-colon_BA_218	bacolon3	24	Sa_AKKERMANSIA-M2-j3-exp3-colon_GCMRM_218.D	(02/08/17 00:00:00)	Sa_AKKERMANSIA-M2-j3-exp3-colon_218	gccolon3	195
MITSUAKI-j14-exp2-colon_259	Sa_MITSUAKI-M1-j14-exp2-colon_SF_259.d	(02/17/17 00:00:00)	Sa_MITSUAKI-M1-j14-exp2-colon_SF_259	sfcolon2	40	Sa_MITSUAKI-M1-j14-exp2-colon_PA_259.d	(04/12/17 00:00:00)	Sa_MITSUAKI-M1-j14-exp2-colon_PA_259	pacolon2	161	Sa_MITSUAKI-M1-j14-exp2-colon_BA_259.d	(01/18/17 00:00:00)	Sa_MITSUAKI-M1-j14-exp2-colon_BA_259	bacolon2	247	Sa_MITSUAKI-M1-j14-exp2-colon_GCMRM_259.D	(02/02/17 00:00:00)	Sa_MITSUAKI-M1-j14-exp2-colon_259	gccolon2	161
ATB-j7-exp3-colon_231	Sa_ATB-M3-j7-exp3-colon_SF_231b.d	(02/23/17 00:00:00)	Sa_ATB-M3-j7-exp3-colon_SF_231b	sfcolon3	244	Sa_ATB-M3-j7-exp3-colon_PA_231.d	(04/15/17 00:00:00)	Sa_ATB-M3-j7-exp3-colon_PA_231	pacolon3	179	Sa_ATB-M3-j7-exp3-colon_BA_231.d	(01/15/17 00:00:00)	Sa_ATB-M3-j7-exp3-colon_BA_231	bacolon3	8	Sa_ATB-M3-j7-exp3-colon_GCMRM_231.D	(02/08/17 00:00:00)	Sa_ATB-M3-j7-exp3-colon_231	gccolon3	179
ATB-j7-exp3-colon_230	Sa_ATB-M2-j7-exp3-colon_SF_230.d	(02/23/17 00:00:00)	Sa_ATB-M2-j7-exp3-colon_SF_230	sfcolon3	194	Sa_ATB-M2-j7-exp3-colon_PA_230.d	(04/15/17 00:00:00)	Sa_ATB-M2-j7-exp3-colon_PA_230	pacolon3	196	Sa_ATB-M2-j7-exp3-colon_BA_230.d	(01/15/17 00:00:00)	Sa_ATB-M2-j7-exp3-colon_BA_230	bacolon3	25	Sa_ATB-M2-j7-exp3-colon_GCMRM_230.D	(02/08/17 00:00:00)	Sa_ATB-M2-j7-exp3-colon_230	gccolon3	196
MITSUAKI-j3-exp2-colon_221	Sa_MITSUAKI-M5-j3-exp2-colon_SF_221.d	(02/17/17 00:00:00)	Sa_MITSUAKI-M5-j3-exp2-colon_SF_221	sfcolon2	41	Sa_MITSUAKI-M5-j3-exp2-colon_PA_221.d	(04/12/17 00:00:00)	Sa_MITSUAKI-M5-j3-exp2-colon_PA_221	pacolon2	162	Sa_MITSUAKI-M5-j3-exp2-colon_BA_221.d	(01/18/17 00:00:00)	Sa_MITSUAKI-M5-j3-exp2-colon_BA_221	bacolon2	248	Sa_MITSUAKI-M5-j3-exp2-colon_GCMRM_221.D	(02/02/17 00:00:00)	Sa_MITSUAKI-M5-j3-exp2-colon_221	gccolon2	162
Nacl-j3-exp3-colon_202	Sa_Nacl-M4-j3-exp3-colon_SF_202.d	(02/23/17 00:00:00)	Sa_Nacl-M4-j3-exp3-colon_SF_202	sfcolon3	195	Sa_Nacl-M4-j3-exp3-colon_PA_202.d	(04/15/17 00:00:00)	Sa_Nacl-M4-j3-exp3-colon_PA_202	pacolon3	197	Sa_Nacl-M4-j3-exp3-colon_BA_202.d	(01/15/17 00:00:00)	Sa_Nacl-M4-j3-exp3-colon_BA_202	bacolon3	26	Sa_Nacl-M4-j3-exp3-colon_GCMRM_202.D	(02/08/17 00:00:00)	Sa_Nacl-M4-j3-exp3-colon_202	gccolon3	197
BURKO-j14-exp2-colon_258	Sa_BURKO-M6-j14-exp2-colon_SF_258.d	(02/17/17 00:00:00)	Sa_BURKO-M6-j14-exp2-colon_SF_258	sfcolon2	42	Sa_BURKO-M6-j14-exp2-colon_PA_258.d	(04/12/17 00:00:00)	Sa_BURKO-M6-j14-exp2-colon_PA_258	pacolon2	163	Sa_BURKO-M6-j14-exp2-colon_BA_258.d	(01/18/17 00:00:00)	Sa_BURKO-M6-j14-exp2-colon_BA_258	bacolon2	249	Sa_BURKO-M6-j14-exp2-colon_GCMRM_258.D	(02/02/17 00:00:00)	Sa_BURKO-M6-j14-exp2-colon_258	gccolon2	163
AKKERMANSIA-j14-exp3-colon_259	Sa_AKKERMANSIA-M1-j14-exp3-colon_SF_259.d	(02/23/17 00:00:00)	Sa_AKKERMANSIA-M1-j14-exp3-colon_SF_259	sfcolon3	196	Sa_AKKERMANSIA-M1-j14-exp3-colon_PA_259.d	(04/15/17 00:00:00)	Sa_AKKERMANSIA-M1-j14-exp3-colon_PA_259	pacolon3	198	Sa_AKKERMANSIA-M1-j14-exp3-colon_BA_259.d	(01/15/17 00:00:00)	Sa_AKKERMANSIA-M1-j14-exp3-colon_BA_259	bacolon3	27	Sa_AKKERMANSIA-M1-j14-exp3-colon_GCMRM_259.D	(02/08/17 00:00:00)	Sa_AKKERMANSIA-M1-j14-exp3-colon_259	gccolon3	198
MITSUAKI-j7-exp2-colon_246	Sa_MITSUAKI-M6-j7-exp2-colon_SF_246.d	(02/17/17 00:00:00)	Sa_MITSUAKI-M6-j7-exp2-colon_SF_246	sfcolon2	43	Sa_MITSUAKI-M6-j7-exp2-colon_PA_246.d	(04/12/17 00:00:00)	Sa_MITSUAKI-M6-j7-exp2-colon_PA_246	pacolon2	164	Sa_MITSUAKI-M6-j7-exp2-colon_BA_246.d	(01/18/17 00:00:00)	Sa_MITSUAKI-M6-j7-exp2-colon_BA_246	bacolon2	250	Sa_MITSUAKI-M6-j7-exp2-colon_GCMRM_246.D	(02/02/17 00:00:00)	Sa_MITSUAKI-M6-j7-exp2-colon_246	gccolon2	164
BURKO-j7-exp2-colon_239	Sa_BURKO-M5-j7-exp2-colon_SF_239.d	(02/17/17 00:00:00)	Sa_BURKO-M5-j7-exp2-colon_SF_239	sfcolon2	44	Sa_BURKO-M5-j7-exp2-colon_PA_239.d	(04/12/17 00:00:00)	Sa_BURKO-M5-j7-exp2-colon_PA_239	pacolon2	165	Sa_BURKO-M5-j7-exp2-colon_BA_239.d	(01/18/17 00:00:00)	Sa_BURKO-M5-j7-exp2-colon_BA_239	bacolon2	251	Sa_BURKO-M5-j7-exp2-colon_GCMRM_239.D	(02/02/17 00:00:00)	Sa_BURKO-M5-j7-exp2-colon_239	gccolon2	165
ATB-j3-exp3-colon_209	Sa_ATB-M5-j3-exp3-colon_SF_209.d	(02/23/17 00:00:00)	Sa_ATB-M5-j3-exp3-colon_SF_209	sfcolon3	198	Sa_ATB-M5-j3-exp3-colon_PA_209.d	(04/15/17 00:00:00)	Sa_ATB-M5-j3-exp3-colon_PA_209	pacolon3	200	Sa_ATB-M5-j3-exp3-colon_BA_209.d	(01/15/17 00:00:00)	Sa_ATB-M5-j3-exp3-colon_BA_209	bacolon3	29	Sa_ATB-M5-j3-exp3-colon_GCMRM_209.D	(02/08/17 00:00:00)	Sa_ATB-M5-j3-exp3-colon_209	gccolon3	200
Nacl-j7-exp2-colon_228	Sa_Nacl-M6-j7-exp2-colon_SF_228.d	(02/17/17 00:00:00)	Sa_Nacl-M6-j7-exp2-colon_SF_228	sfcolon2	45	Sa_Nacl-M6-j7-exp2-colon_PA_228.d	(04/12/17 00:00:00)	Sa_Nacl-M6-j7-exp2-colon_PA_228	pacolon2	166	Sa_Nacl-M6-j7-exp2-colon_BA_228.d	(01/18/17 00:00:00)	Sa_Nacl-M6-j7-exp2-colon_BA_228	bacolon2	252	Sa_Nacl-M6-j7-exp2-colon_GCMRM_228.D	(02/02/17 00:00:00)	Sa_Nacl-M6-j7-exp2-colon_228	gccolon2	166
FECES-j7-exp3-colon_239	Sa_FECES-M5-j7-exp3-colon_SF_239.d	(02/23/17 00:00:00)	Sa_FECES-M5-j7-exp3-colon_SF_239	sfcolon3	199	Sa_FECES-M5-j7-exp3-colon_PA_239.d	(04/15/17 00:00:00)	Sa_FECES-M5-j7-exp3-colon_PA_239	pacolon3	201	Sa_FECES-M5-j7-exp3-colon_BA_239.d	(01/15/17 00:00:00)	Sa_FECES-M5-j7-exp3-colon_BA_239	bacolon3	30	Sa_FECES-M5-j7-exp3-colon_GCMRM_239.D	(02/08/17 00:00:00)	Sa_FECES-M5-j7-exp3-colon_239	gccolon3	201
MITSUAKI-j7-exp2-colon_241	Sa_MITSUAKI-M1-j7-exp2-colon_SF_241.d	(02/17/17 00:00:00)	Sa_MITSUAKI-M1-j7-exp2-colon_SF_241	sfcolon2	46	Sa_MITSUAKI-M1-j7-exp2-colon_PA_241.d	(04/12/17 00:00:00)	Sa_MITSUAKI-M1-j7-exp2-colon_PA_241	pacolon2	167	Sa_MITSUAKI-M1-j7-exp2-colon_BA_241.d	(01/18/17 00:00:00)	Sa_MITSUAKI-M1-j7-exp2-colon_BA_241	bacolon2	253	Sa_MITSUAKI-M1-j7-exp2-colon_GCMRM_241.D	(02/02/17 00:00:00)	Sa_MITSUAKI-M1-j7-exp2-colon_241	gccolon2	167
AKKERMANSIA-j7-exp3-colon_244	Sa_AKKERMANSIA-M4-j7-exp3-colon_SF_244.d	(02/23/17 00:00:00)	Sa_AKKERMANSIA-M4-j7-exp3-colon_SF_244	sfcolon3	200	Sa_AKKERMANSIA-M4-j7-exp3-colon_PA_244.d	(04/15/17 00:00:00)	Sa_AKKERMANSIA-M4-j7-exp3-colon_PA_244	pacolon3	202	Sa_AKKERMANSIA-M4-j7-exp3-colon_BA_244.d	(01/15/17 00:00:00)	Sa_AKKERMANSIA-M4-j7-exp3-colon_BA_244	bacolon3	31	Sa_AKKERMANSIA-M4-j7-exp3-colon_GCMRM_244.D	(02/08/17 00:00:00)	Sa_AKKERMANSIA-M4-j7-exp3-colon_244	gccolon3	202
ATB-j14-exp2-colon_247	Sa_ATB-M1-j14-exp2-colon_SF_247.d	(02/17/17 00:00:00)	Sa_ATB-M1-j14-exp2-colon_SF_247	sfcolon2	47	Sa_ATB-M1-j14-exp2-colon_PA_247.d	(04/12/17 00:00:00)	Sa_ATB-M1-j14-exp2-colon_PA_247	pacolon2	168	Sa_ATB-M1-j14-exp2-colon_BA_247.d	(01/18/17 00:00:00)	Sa_ATB-M1-j14-exp2-colon_BA_247	bacolon2	254	Sa_ATB-M1-j14-exp2-colon_GCMRM_247.D	(02/02/17 00:00:00)	Sa_ATB-M1-j14-exp2-colon_247	gccolon2	168
ATB-j14-exp3-colon_251	Sa_ATB-M5-j14-exp3-colon_SF_251.d	(02/23/17 00:00:00)	Sa_ATB-M5-j14-exp3-colon_SF_251	sfcolon3	201	Sa_ATB-M5-j14-exp3-colon_PA_251.d	(04/15/17 00:00:00)	Sa_ATB-M5-j14-exp3-colon_PA_251	pacolon3	203	Sa_ATB-M5-j14-exp3-colon_BA_251.d	(01/15/17 00:00:00)	Sa_ATB-M5-j14-exp3-colon_BA_251	bacolon3	32	Sa_ATB-M5-j14-exp3-colon_GCMRM_251.D	(02/08/17 00:00:00)	Sa_ATB-M5-j14-exp3-colon_251	gccolon3	203
BURKO-j3-exp2-colon_215	Sa_BURKO-M5-j3-exp2-colon_SF_215.d	(02/17/17 00:00:00)	Sa_BURKO-M5-j3-exp2-colon_SF_215	sfcolon2	48	Sa_BURKO-M5-j3-exp2-colon_PA_215.d	(04/12/17 00:00:00)	Sa_BURKO-M5-j3-exp2-colon_PA_215	pacolon2	169	Sa_BURKO-M5-j3-exp2-colon_BA_215.d	(01/18/17 00:00:00)	Sa_BURKO-M5-j3-exp2-colon_BA_215	bacolon2	255	Sa_BURKO-M5-j3-exp2-colon_GCMRM_215.D	(02/02/17 00:00:00)	Sa_BURKO-M5-j3-exp2-colon_215	gccolon2	169
Nacl-j7-exp3-colon_226	Sa_Nacl-M4-j7-exp3-colon_SF_226.d	(02/23/17 00:00:00)	Sa_Nacl-M4-j7-exp3-colon_SF_226	sfcolon3	202	Sa_Nacl-M4-j7-exp3-colon_PA_226.d	(04/15/17 00:00:00)	Sa_Nacl-M4-j7-exp3-colon_PA_226	pacolon3	204	Sa_Nacl-M4-j7-exp3-colon_BA_226.d	(01/15/17 00:00:00)	Sa_Nacl-M4-j7-exp3-colon_BA_226	bacolon3	33	Sa_Nacl-M4-j7-exp3-colon_GCMRM_226.D	(02/08/17 00:00:00)	Sa_Nacl-M4-j7-exp3-colon_226	gccolon3	204
MITSUAKI-j14-exp2-colon_264	Sa_MITSUAKI-M6-j14-exp2-colon_SF_264.d	(02/17/17 00:00:00)	Sa_MITSUAKI-M6-j14-exp2-colon_SF_264	sfcolon2	49	Sa_MITSUAKI-M6-j14-exp2-colon_PA_264.d	(04/12/17 00:00:00)	Sa_MITSUAKI-M6-j14-exp2-colon_PA_264	pacolon2	170	Sa_MITSUAKI-M6-j14-exp2-colon_BA_264.d	(01/18/17 00:00:00)	Sa_MITSUAKI-M6-j14-exp2-colon_BA_264	bacolon2	256	Sa_MITSUAKI-M6-j14-exp2-colon_GCMRM_264.D	(02/02/17 00:00:00)	Sa_MITSUAKI-M6-j14-exp2-colon_264	gccolon2	170
FECES-j14-exp3-colon_256	Sa_FECES-M4-j14-exp3-colon_SF_256.d	(02/23/17 00:00:00)	Sa_FECES-M4-j14-exp3-colon_SF_256	sfcolon3	203	Sa_FECES-M4-j14-exp3-colon_PA_256.d	(04/15/17 00:00:00)	Sa_FECES-M4-j14-exp3-colon_PA_256	pacolon3	205	Sa_FECES-M4-j14-exp3-colon_BA_256.d	(01/15/17 00:00:00)	Sa_FECES-M4-j14-exp3-colon_BA_256	bacolon3	34	Sa_FECES-M4-j14-exp3-colon_GCMRM_256.D	(02/08/17 00:00:00)	Sa_FECES-M4-j14-exp3-colon_256	gccolon3	205
ATB-j7-exp3-colon_233	Sa_ATB-M5-j7-exp3-colon_SF_233.d	(02/23/17 00:00:00)	Sa_ATB-M5-j7-exp3-colon_SF_233	sfcolon3	204	Sa_ATB-M5-j7-exp3-colon_PA_233.d	(04/15/17 00:00:00)	Sa_ATB-M5-j7-exp3-colon_PA_233	pacolon3	206	Sa_ATB-M5-j7-exp3-colon_BA_233.d	(01/15/17 00:00:00)	Sa_ATB-M5-j7-exp3-colon_BA_233	bacolon3	35	Sa_ATB-M5-j7-exp3-colon_GCMRM_233.D	(02/08/17 00:00:00)	Sa_ATB-M5-j7-exp3-colon_233	gccolon3	206
AKKERMANSIA-j3-exp3-colon_217	Sa_AKKERMANSIA-M1-j3-exp3-colon_SF_217.d	(02/23/17 00:00:00)	Sa_AKKERMANSIA-M1-j3-exp3-colon_SF_217	sfcolon3	205	Sa_AKKERMANSIA-M1-j3-exp3-colon_PA_217.d	(04/15/17 00:00:00)	Sa_AKKERMANSIA-M1-j3-exp3-colon_PA_217	pacolon3	207	Sa_AKKERMANSIA-M1-j3-exp3-colon_BA_217.d	(01/15/17 00:00:00)	Sa_AKKERMANSIA-M1-j3-exp3-colon_BA_217	bacolon3	36	Sa_AKKERMANSIA-M1-j3-exp3-colon_GCMRM_217.D	(02/08/17 00:00:00)	Sa_AKKERMANSIA-M1-j3-exp3-colon_217	gccolon3	207
FECES-j7-exp3-colon_236	Sa_FECES-M2-j7-exp3-colon_SF_236.d	(02/23/17 00:00:00)	Sa_FECES-M2-j7-exp3-colon_SF_236	sfcolon3	206	Sa_FECES-M2-j7-exp3-colon_PA_236.d	(04/15/17 00:00:00)	Sa_FECES-M2-j7-exp3-colon_PA_236	pacolon3	208	Sa_FECES-M2-j7-exp3-colon_BA_236.d	(01/15/17 00:00:00)	Sa_FECES-M2-j7-exp3-colon_BA_236	bacolon3	37	Sa_FECES-M2-j7-exp3-colon_GCMRM_236.D	(02/08/17 00:00:00)	Sa_FECES-M2-j7-exp3-colon_236	gccolon3	208
Nacl-j3-exp3-colon_204	Sa_Nacl-M6-j3-exp3-colon_SF_204.d	(02/23/17 00:00:00)	Sa_Nacl-M6-j3-exp3-colon_SF_204	sfcolon3	207	Sa_Nacl-M6-j3-exp3-colon_PA_204.d	(04/15/17 00:00:00)	Sa_Nacl-M6-j3-exp3-colon_PA_204	pacolon3	209	Sa_Nacl-M6-j3-exp3-colon_BA_204.d	(01/15/17 00:00:00)	Sa_Nacl-M6-j3-exp3-colon_BA_204	bacolon3	38	Sa_Nacl-M6-j3-exp3-colon_GCMRM_204.D	(02/08/17 00:00:00)	Sa_Nacl-M6-j3-exp3-colon_204	gccolon3	209
AKKERMANSIA-j14-exp3-colon_262	Sa_AKKERMANSIA-M4-j14-exp3-colon_SF_262.d	(02/23/17 00:00:00)	Sa_AKKERMANSIA-M4-j14-exp3-colon_SF_262	sfcolon3	208	Sa_AKKERMANSIA-M4-j14-exp3-colon_PA_262.d	(04/15/17 00:00:00)	Sa_AKKERMANSIA-M4-j14-exp3-colon_PA_262	pacolon3	210	Sa_AKKERMANSIA-M4-j14-exp3-colon_BA_262.d	(01/15/17 00:00:00)	Sa_AKKERMANSIA-M4-j14-exp3-colon_BA_262	bacolon3	39	Sa_AKKERMANSIA-M4-j14-exp3-colon_GCMRM_262.D	(02/08/17 00:00:00)	Sa_AKKERMANSIA-M4-j14-exp3-colon_262	gccolon3	210
ATB-j3-exp3-colon_205	Sa_ATB-M1-j3-exp3-colon_SF_205.d	(02/23/17 00:00:00)	Sa_ATB-M1-j3-exp3-colon_SF_205	sfcolon3	211	Sa_ATB-M1-j3-exp3-colon_PA_205.d	(04/15/17 00:00:00)	Sa_ATB-M1-j3-exp3-colon_PA_205	pacolon3	213	Sa_ATB-M1-j3-exp3-colon_BA_205.d	(01/15/17 00:00:00)	Sa_ATB-M1-j3-exp3-colon_BA_205	bacolon3	42	Sa_ATB-M1-j3-exp3-colon_GCMRM_205.D	(02/08/17 00:00:00)	Sa_ATB-M1-j3-exp3-colon_205	gccolon3	212
FECES-j14-exp3-colon_258	Sa_FECES-M6-j14-exp3-colon_SF_258.d	(02/23/17 00:00:00)	Sa_FECES-M6-j14-exp3-colon_SF_258	sfcolon3	212	Sa_FECES-M6-j14-exp3-colon_PA_258.d	(04/15/17 00:00:00)	Sa_FECES-M6-j14-exp3-colon_PA_258	pacolon3	214	Sa_FECES-M6-j14-exp3-colon_BA_258.d	(01/15/17 00:00:00)	Sa_FECES-M6-j14-exp3-colon_BA_258	bacolon3	43	Sa_FECES-M6-j14-exp3-colon_GCMRM_258.D	(02/08/17 00:00:00)	Sa_FECES-M6-j14-exp3-colon_258	gccolon3	213
Nacl-j3-exp3-colon_200	Sa_Nacl-M2-j3-exp3-colon_SF_200.d	(02/23/17 00:00:00)	Sa_Nacl-M2-j3-exp3-colon_SF_200	sfcolon3	214	Sa_Nacl-M2-j3-exp3-colon_PA_200.d	(04/15/17 00:00:00)	Sa_Nacl-M2-j3-exp3-colon_PA_200	pacolon3	216	Sa_Nacl-M2-j3-exp3-colon_BA_200.d	(01/15/17 00:00:00)	Sa_Nacl-M2-j3-exp3-colon_BA_200	bacolon3	45	Sa_Nacl-M2-j3-exp3-colon_GCMRM_200.D	(02/08/17 00:00:00)	Sa_Nacl-M2-j3-exp3-colon_200	gccolon3	214
ATB-j14-exp3-colon_250	Sa_ATB-M4-j14-exp3-colon_SF_250.d	(02/23/17 00:00:00)	Sa_ATB-M4-j14-exp3-colon_SF_250	sfcolon3	215	Sa_ATB-M4-j14-exp3-colon_PA_250.d	(04/15/17 00:00:00)	Sa_ATB-M4-j14-exp3-colon_PA_250	pacolon3	217	Sa_ATB-M4-j14-exp3-colon_BA_250.d	(01/15/17 00:00:00)	Sa_ATB-M4-j14-exp3-colon_BA_250	bacolon3	46	Sa_ATB-M4-j14-exp3-colon_GCMRM_250.D	(02/08/17 00:00:00)	Sa_ATB-M4-j14-exp3-colon_250	gccolon3	215
AKKERMANSIA-j3-exp3-colon_221	Sa_AKKERMANSIA-M5-j3-exp3-colon_SF_221.d	(02/23/17 00:00:00)	Sa_AKKERMANSIA-M5-j3-exp3-colon_SF_221	sfcolon3	216	Sa_AKKERMANSIA-M5-j3-exp3-colon_PA_221.d	(04/15/17 00:00:00)	Sa_AKKERMANSIA-M5-j3-exp3-colon_PA_221	pacolon3	218	Sa_AKKERMANSIA-M5-j3-exp3-colon_BA_221.d	(01/15/17 00:00:00)	Sa_AKKERMANSIA-M5-j3-exp3-colon_BA_221	bacolon3	47	Sa_AKKERMANSIA-M5-j3-exp3-colon_GCMRM_221.D	(02/08/17 00:00:00)	Sa_AKKERMANSIA-M5-j3-exp3-colon_221	gccolon3	216
FECES-j7-exp3-colon_237	Sa_FECES-M3-j7-exp3-colon_SF_237.d	(02/23/17 00:00:00)	Sa_FECES-M3-j7-exp3-colon_SF_237	sfcolon3	217	Sa_FECES-M3-j7-exp3-colon_PA_237.d	(04/15/17 00:00:00)	Sa_FECES-M3-j7-exp3-colon_PA_237	pacolon3	219	Sa_FECES-M3-j7-exp3-colon_BA_237.d	(01/15/17 00:00:00)	Sa_FECES-M3-j7-exp3-colon_BA_237	bacolon3	48	Sa_FECES-M3-j7-exp3-colon_GCMRM_237.D	(02/08/17 00:00:00)	Sa_FECES-M3-j7-exp3-colon_237	gccolon3	217
ATB-j7-exp3-colon_232	Sa_ATB-M4-j7-exp3-colon_SF_232.d	(02/23/17 00:00:00)	Sa_ATB-M4-j7-exp3-colon_SF_232	sfcolon3	218	Sa_ATB-M4-j7-exp3-colon_PA_232.d	(04/15/17 00:00:00)	Sa_ATB-M4-j7-exp3-colon_PA_232	pacolon3	220	Sa_ATB-M4-j7-exp3-colon_BA_232.d	(01/15/17 00:00:00)	Sa_ATB-M4-j7-exp3-colon_BA_232	bacolon3	49	Sa_ATB-M4-j7-exp3-colon_GCMRM_232.D	(02/08/17 00:00:00)	Sa_ATB-M4-j7-exp3-colon_232	gccolon3	218
FECES-j3-exp3-colon_215	Sa_FECES-M5-j3-exp3-colon_SF_215.d	(02/23/17 00:00:00)	Sa_FECES-M5-j3-exp3-colon_SF_215	sfcolon3	210	Sa_FECES-M5-j3-exp3-colon_PA_215.d	(04/15/17 00:00:00)	Sa_FECES-M5-j3-exp3-colon_PA_215	pacolon3	212	Sa_FECES-M5-j3-exp3-colon_BA_215.d	(01/15/17 00:00:00)	Sa_FECES-M5-j3-exp3-colon_BA_215	bacolon3	41	Sa_FECES-M5-j3-exp3-colon_GCMRM_215b.D	(02/08/17 00:00:00)	Sa_FECES-M5-j3-exp3-colon_215b	gccolon3	243
AKKERMANSIA-j14-exp3-colon_260	Sa_AKKERMANSIA-M2-j14-exp3-colon_SF_260.d	(02/23/17 00:00:00)	Sa_AKKERMANSIA-M2-j14-exp3-colon_SF_260	sfcolon3	219	Sa_AKKERMANSIA-M2-j14-exp3-colon_PA_260.d	(04/15/17 00:00:00)	Sa_AKKERMANSIA-M2-j14-exp3-colon_PA_260	pacolon3	221	Sa_AKKERMANSIA-M2-j14-exp3-colon_BA_260.d	(01/15/17 00:00:00)	Sa_AKKERMANSIA-M2-j14-exp3-colon_BA_260	bacolon3	50	Sa_AKKERMANSIA-M2-j14-exp3-colon_GCMRM_260.D	(02/08/17 00:00:00)	Sa_AKKERMANSIA-M2-j14-exp3-colon_260	gccolon3	219
Nacl-j7-exp3-colon_223	Sa_Nacl-M1-j7-exp3-colon_SF_223.d	(02/23/17 00:00:00)	Sa_Nacl-M1-j7-exp3-colon_SF_223	sfcolon3	220	Sa_Nacl-M1-j7-exp3-colon_PA_223.d	(04/15/17 00:00:00)	Sa_Nacl-M1-j7-exp3-colon_PA_223	pacolon3	222	Sa_Nacl-M1-j7-exp3-colon_BA_223.d	(01/15/17 00:00:00)	Sa_Nacl-M1-j7-exp3-colon_BA_223	bacolon3	51	Sa_Nacl-M1-j7-exp3-colon_GCMRM_223.D	(02/08/17 00:00:00)	Sa_Nacl-M1-j7-exp3-colon_223	gccolon3	220
AKKERMANSIA-j7-exp3-colon_242	Sa_AKKERMANSIA-M2-j7-exp3-colon_SF_242.d	(02/23/17 00:00:00)	Sa_AKKERMANSIA-M2-j7-exp3-colon_SF_242	sfcolon3	213	Sa_AKKERMANSIA-M2-j7-exp3-colon_PA_242.d	(04/15/17 00:00:00)	Sa_AKKERMANSIA-M2-j7-exp3-colon_PA_242	pacolon3	215	Sa_AKKERMANSIA-M2-j7-exp3-colon_BA_242.d	(01/15/17 00:00:00)	Sa_AKKERMANSIA-M2-j7-exp3-colon_BA_242	bacolon3	44	Sa_AKKERMANSIA-M2-j7-exp3-colon_GCMRM_242b.D	(02/08/17 00:00:00)	Sa_AKKERMANSIA-M2-j7-exp3-colon_242b	gccolon3	244
FECES-j3-exp3-colon_213	Sa_FECES-M3-j3-exp3-colon_SF_213.d	(02/23/17 00:00:00)	Sa_FECES-M3-j3-exp3-colon_SF_213	sfcolon3	222	Sa_FECES-M3-j3-exp3-colon_PA_213.d	(04/15/17 00:00:00)	Sa_FECES-M3-j3-exp3-colon_PA_213	pacolon3	224	Sa_FECES-M3-j3-exp3-colon_BA_213.d	(01/15/17 00:00:00)	Sa_FECES-M3-j3-exp3-colon_BA_213	bacolon3	53	Sa_FECES-M3-j3-exp3-colon_GCMRM_213.D	(02/08/17 00:00:00)	Sa_FECES-M3-j3-exp3-colon_213	gccolon3	222
AKKERMANSIA-j7-exp3-colon_243	Sa_AKKERMANSIA-M3-j7-exp3-colon_SF_243.d	(02/23/17 00:00:00)	Sa_AKKERMANSIA-M3-j7-exp3-colon_SF_243	sfcolon3	223	Sa_AKKERMANSIA-M3-j7-exp3-colon_PA_243.d	(04/15/17 00:00:00)	Sa_AKKERMANSIA-M3-j7-exp3-colon_PA_243	pacolon3	225	Sa_AKKERMANSIA-M3-j7-exp3-colon_BA_243.d	(01/15/17 00:00:00)	Sa_AKKERMANSIA-M3-j7-exp3-colon_BA_243	bacolon3	54	Sa_AKKERMANSIA-M3-j7-exp3-colon_GCMRM_243.D	(02/08/17 00:00:00)	Sa_AKKERMANSIA-M3-j7-exp3-colon_243	gccolon3	223
ATB-j3-exp3-colon_208	Sa_ATB-M4-j3-exp3-colon_SF_208.d	(02/23/17 00:00:00)	Sa_ATB-M4-j3-exp3-colon_SF_208	sfcolon3	224	Sa_ATB-M4-j3-exp3-colon_PA_208.d	(04/15/17 00:00:00)	Sa_ATB-M4-j3-exp3-colon_PA_208	pacolon3	226	Sa_ATB-M4-j3-exp3-colon_BA_208.d	(01/15/17 00:00:00)	Sa_ATB-M4-j3-exp3-colon_BA_208	bacolon3	55	Sa_ATB-M4-j3-exp3-colon_GCMRM_208.D	(02/08/17 00:00:00)	Sa_ATB-M4-j3-exp3-colon_208	gccolon3	224
AKKERMANSIA-j14-exp3-colon_264	Sa_AKKERMANSIA-M6-j14-exp3-colon_SF_264.d	(02/23/17 00:00:00)	Sa_AKKERMANSIA-M6-j14-exp3-colon_SF_264	sfcolon3	225	Sa_AKKERMANSIA-M6-j14-exp3-colon_PA_264.d	(04/15/17 00:00:00)	Sa_AKKERMANSIA-M6-j14-exp3-colon_PA_264	pacolon3	227	Sa_AKKERMANSIA-M6-j14-exp3-colon_BA_264.d	(01/15/17 00:00:00)	Sa_AKKERMANSIA-M6-j14-exp3-colon_BA_264	bacolon3	56	Sa_AKKERMANSIA-M6-j14-exp3-colon_GCMRM_264.D	(02/08/17 00:00:00)	Sa_AKKERMANSIA-M6-j14-exp3-colon_264	gccolon3	225
FECES-j7-exp3-colon_240	Sa_FECES-M6-j7-exp3-colon_SF_240.d	(02/23/17 00:00:00)	Sa_FECES-M6-j7-exp3-colon_SF_240	sfcolon3	226	Sa_FECES-M6-j7-exp3-colon_PA_240.d	(04/15/17 00:00:00)	Sa_FECES-M6-j7-exp3-colon_PA_240	pacolon3	228	Sa_FECES-M6-j7-exp3-colon_BA_240.d	(01/15/17 00:00:00)	Sa_FECES-M6-j7-exp3-colon_BA_240	bacolon3	57	Sa_FECES-M6-j7-exp3-colon_GCMRM_240.D	(02/08/17 00:00:00)	Sa_FECES-M6-j7-exp3-colon_240	gccolon3	226
ATB-j14-exp3-colon_249	Sa_ATB-M3-j14-exp3-colon_SF_249.d	(02/23/17 00:00:00)	Sa_ATB-M3-j14-exp3-colon_SF_249	sfcolon3	227	Sa_ATB-M3-j14-exp3-colon_PA_249.d	(04/15/17 00:00:00)	Sa_ATB-M3-j14-exp3-colon_PA_249	pacolon3	229	Sa_ATB-M3-j14-exp3-colon_BA_249.d	(01/15/17 00:00:00)	Sa_ATB-M3-j14-exp3-colon_BA_249	bacolon3	58	Sa_ATB-M3-j14-exp3-colon_GCMRM_249.D	(02/08/17 00:00:00)	Sa_ATB-M3-j14-exp3-colon_249	gccolon3	227
Nacl-j7-exp3-colon_228	Sa_Nacl-M6-j7-exp3-colon_SF_228.d	(02/23/17 00:00:00)	Sa_Nacl-M6-j7-exp3-colon_SF_228	sfcolon3	228	Sa_Nacl-M6-j7-exp3-colon_PA_228.d	(04/15/17 00:00:00)	Sa_Nacl-M6-j7-exp3-colon_PA_228	pacolon3	230	Sa_Nacl-M6-j7-exp3-colon_BA_228.d	(01/15/17 00:00:00)	Sa_Nacl-M6-j7-exp3-colon_BA_228	bacolon3	59	Sa_Nacl-M6-j7-exp3-colon_GCMRM_228.D	(02/08/17 00:00:00)	Sa_Nacl-M6-j7-exp3-colon_228	gccolon3	228
ATB-j7-exp3-colon_229	Sa_ATB-M1-j7-exp3-colon_SF_229.d	(02/23/17 00:00:00)	Sa_ATB-M1-j7-exp3-colon_SF_229	sfcolon3	230	Sa_ATB-M1-j7-exp3-colon_PA_229.d	(04/15/17 00:00:00)	Sa_ATB-M1-j7-exp3-colon_PA_229	pacolon3	232	Sa_ATB-M1-j7-exp3-colon_BA_229.d	(01/15/17 00:00:00)	Sa_ATB-M1-j7-exp3-colon_BA_229	bacolon3	61	Sa_ATB-M1-j7-exp3-colon_GCMRM_229.D	(02/08/17 00:00:00)	Sa_ATB-M1-j7-exp3-colon_229	gccolon3	229
FECES-j14-exp3-colon_253	Sa_FECES-M1-j14-exp3-colon_SF_253.d	(02/23/17 00:00:00)	Sa_FECES-M1-j14-exp3-colon_SF_253	sfcolon3	231	Sa_FECES-M1-j14-exp3-colon_PA_253.d	(04/15/17 00:00:00)	Sa_FECES-M1-j14-exp3-colon_PA_253	pacolon3	233	Sa_FECES-M1-j14-exp3-colon_BA_253.d	(01/15/17 00:00:00)	Sa_FECES-M1-j14-exp3-colon_BA_253	bacolon3	62	Sa_FECES-M1-j14-exp3-colon_GCMRM_253.D	(02/08/17 00:00:00)	Sa_FECES-M1-j14-exp3-colon_253	gccolon3	230
Nacl-j3-exp3-colon_199	Sa_Nacl-M1-j3-exp3-colon_SF_199.d	(02/23/17 00:00:00)	Sa_Nacl-M1-j3-exp3-colon_SF_199	sfcolon3	232	Sa_Nacl-M1-j3-exp3-colon_PA_199.d	(04/15/17 00:00:00)	Sa_Nacl-M1-j3-exp3-colon_PA_199	pacolon3	234	Sa_Nacl-M1-j3-exp3-colon_BA_199.d	(01/15/17 00:00:00)	Sa_Nacl-M1-j3-exp3-colon_BA_199	bacolon3	63	Sa_Nacl-M1-j3-exp3-colon_GCMRM_199.D	(02/08/17 00:00:00)	Sa_Nacl-M1-j3-exp3-colon_199	gccolon3	231
AKKERMANSIA-j3-exp3-colon_219	Sa_AKKERMANSIA-M3-j3-exp3-colon_SF_219.d	(02/23/17 00:00:00)	Sa_AKKERMANSIA-M3-j3-exp3-colon_SF_219	sfcolon3	229	Sa_AKKERMANSIA-M3-j3-exp3-colon_PA_219.d	(04/15/17 00:00:00)	Sa_AKKERMANSIA-M3-j3-exp3-colon_PA_219	pacolon3	231	Sa_AKKERMANSIA-M3-j3-exp3-colon_BA_219.d	(01/15/17 00:00:00)	Sa_AKKERMANSIA-M3-j3-exp3-colon_BA_219	bacolon3	60	Sa_AKKERMANSIA-M3-j3-exp3-colon_GCMRM_219b.D	(02/11/17 00:00:00)	Sa_AKKERMANSIA-M3-j3-exp3-colon_219b	gccolon3	246
ATB-j14-exp3-colon_252	Sa_ATB-M6-j14-exp3-colon_SF_252.d	(02/23/17 00:00:00)	Sa_ATB-M6-j14-exp3-colon_SF_252	sfcolon3	234	Sa_ATB-M6-j14-exp3-colon_PA_252.d	(04/15/17 00:00:00)	Sa_ATB-M6-j14-exp3-colon_PA_252	pacolon3	236	Sa_ATB-M6-j14-exp3-colon_BA_252.d	(01/15/17 00:00:00)	Sa_ATB-M6-j14-exp3-colon_BA_252	bacolon3	65	Sa_ATB-M6-j14-exp3-colon_GCMRM_252.D	(02/08/17 00:00:00)	Sa_ATB-M6-j14-exp3-colon_252	gccolon3	233
AKKERMANSIA-j7-exp3-colon_245	Sa_AKKERMANSIA-M5-j7-exp3-colon_SF_245.d	(02/23/17 00:00:00)	Sa_AKKERMANSIA-M5-j7-exp3-colon_SF_245	sfcolon3	235	Sa_AKKERMANSIA-M5-j7-exp3-colon_PA_245.d	(04/15/17 00:00:00)	Sa_AKKERMANSIA-M5-j7-exp3-colon_PA_245	pacolon3	237	Sa_AKKERMANSIA-M5-j7-exp3-colon_BA_245.d	(01/15/17 00:00:00)	Sa_AKKERMANSIA-M5-j7-exp3-colon_BA_245	bacolon3	66	Sa_AKKERMANSIA-M5-j7-exp3-colon_GCMRM_245.D	(02/08/17 00:00:00)	Sa_AKKERMANSIA-M5-j7-exp3-colon_245	gccolon3	234
ATB-j7-exp3-colon_234	Sa_ATB-M6-j7-exp3-colon_SF_234.d	(02/23/17 00:00:00)	Sa_ATB-M6-j7-exp3-colon_SF_234	sfcolon3	236	Sa_ATB-M6-j7-exp3-colon_PA_234.d	(04/15/17 00:00:00)	Sa_ATB-M6-j7-exp3-colon_PA_234	pacolon3	238	Sa_ATB-M6-j7-exp3-colon_BA_234.d	(01/15/17 00:00:00)	Sa_ATB-M6-j7-exp3-colon_BA_234	bacolon3	67	Sa_ATB-M6-j7-exp3-colon_GCMRM_234.D	(02/08/17 00:00:00)	Sa_ATB-M6-j7-exp3-colon_234	gccolon3	235
Nacl-j7-exp3-colon_227	Sa_Nacl-M5-j7-exp3-colon_SF_227.d	(02/23/17 00:00:00)	Sa_Nacl-M5-j7-exp3-colon_SF_227	sfcolon3	237	Sa_Nacl-M5-j7-exp3-colon_PA_227.d	(04/15/17 00:00:00)	Sa_Nacl-M5-j7-exp3-colon_PA_227	pacolon3	239	Sa_Nacl-M5-j7-exp3-colon_BA_227.d	(01/15/17 00:00:00)	Sa_Nacl-M5-j7-exp3-colon_BA_227	bacolon3	68	Sa_Nacl-M5-j7-exp3-colon_GCMRM_227.D	(02/08/17 00:00:00)	Sa_Nacl-M5-j7-exp3-colon_227	gccolon3	236
FECES-j14-exp3-colon_254	Sa_FECES-M2-j14-exp3-colon_SF_254.d	(02/23/17 00:00:00)	Sa_FECES-M2-j14-exp3-colon_SF_254	sfcolon3	238	Sa_FECES-M2-j14-exp3-colon_PA_254.d	(04/15/17 00:00:00)	Sa_FECES-M2-j14-exp3-colon_PA_254	pacolon3	240	Sa_FECES-M2-j14-exp3-colon_BA_254.d	(01/15/17 00:00:00)	Sa_FECES-M2-j14-exp3-colon_BA_254	bacolon3	69	Sa_FECES-M2-j14-exp3-colon_GCMRM_254.D	(02/08/17 00:00:00)	Sa_FECES-M2-j14-exp3-colon_254	gccolon3	237
ATB-j3-exp3-colon_210	Sa_ATB-M6-j3-exp3-colon_SF_210.d	(02/23/17 00:00:00)	Sa_ATB-M6-j3-exp3-colon_SF_210	sfcolon3	239	Sa_ATB-M6-j3-exp3-colon_PA_210.d	(04/15/17 00:00:00)	Sa_ATB-M6-j3-exp3-colon_PA_210	pacolon3	241	Sa_ATB-M6-j3-exp3-colon_BA_210.d	(01/15/17 00:00:00)	Sa_ATB-M6-j3-exp3-colon_BA_210	bacolon3	70	Sa_ATB-M6-j3-exp3-colon_GCMRM_210.D	(02/08/17 00:00:00)	Sa_ATB-M6-j3-exp3-colon_210	gccolon3	238
AKKERMANSIA-j3-exp3-colon_222	Sa_AKKERMANSIA-M6-j3-exp3-colon_SF_222.d	(02/23/17 00:00:00)	Sa_AKKERMANSIA-M6-j3-exp3-colon_SF_222	sfcolon3	240	Sa_AKKERMANSIA-M6-j3-exp3-colon_PA_222.d	(04/15/17 00:00:00)	Sa_AKKERMANSIA-M6-j3-exp3-colon_PA_222	pacolon3	242	Sa_AKKERMANSIA-M6-j3-exp3-colon_BA_222.d	(01/15/17 00:00:00)	Sa_AKKERMANSIA-M6-j3-exp3-colon_BA_222	bacolon3	71	Sa_AKKERMANSIA-M6-j3-exp3-colon_GCMRM_222.D	(02/08/17 00:00:00)	Sa_AKKERMANSIA-M6-j3-exp3-colon_222	gccolon3	239
FECES-j3-exp3-colon_216	Sa_FECES-M6-j3-exp3-colon_SF_216.d	(02/23/17 00:00:00)	Sa_FECES-M6-j3-exp3-colon_SF_216	sfcolon3	241	Sa_FECES-M6-j3-exp3-colon_PA_216.d	(04/15/17 00:00:00)	Sa_FECES-M6-j3-exp3-colon_PA_216	pacolon3	243	Sa_FECES-M6-j3-exp3-colon_BA_216.d	(01/15/17 00:00:00)	Sa_FECES-M6-j3-exp3-colon_BA_216	bacolon3	72	Sa_FECES-M6-j3-exp3-colon_GCMRM_216.D	(02/08/17 00:00:00)	Sa_FECES-M6-j3-exp3-colon_216	gccolon3	240
ATB-j14-exp3-colon_247	Sa_ATB-M1-j14-exp3-colon_SF_247.d	(02/23/17 00:00:00)	Sa_ATB-M1-j14-exp3-colon_SF_247	sfcolon3	242	Sa_ATB-M1-j14-exp3-colon_PA_247.d	(04/15/17 00:00:00)	Sa_ATB-M1-j14-exp3-colon_PA_247	pacolon3	244	Sa_ATB-M1-j14-exp3-colon_BA_247.d	(01/15/17 00:00:00)	Sa_ATB-M1-j14-exp3-colon_BA_247	bacolon3	73	Sa_ATB-M1-j14-exp3-colon_GCMRM_247.D	(02/08/17 00:00:00)	Sa_ATB-M1-j14-exp3-colon_247	gccolon3	241
AKKERMANSIA-j7-exp3-colon_246	Sa_AKKERMANSIA-M6-j7-exp3-colon_SF_246.d	(02/23/17 00:00:00)	Sa_AKKERMANSIA-M6-j7-exp3-colon_SF_246	sfcolon3	243	Sa_AKKERMANSIA-M6-j7-exp3-colon_PA_246.d	(04/15/17 00:00:00)	Sa_AKKERMANSIA-M6-j7-exp3-colon_PA_246	pacolon3	245	Sa_AKKERMANSIA-M6-j7-exp3-colon_BA_246.d	(01/15/17 00:00:00)	Sa_AKKERMANSIA-M6-j7-exp3-colon_BA_246	bacolon3	74	Sa_AKKERMANSIA-M6-j7-exp3-colon_GCMRM_246.D	(02/08/17 00:00:00)	Sa_AKKERMANSIA-M6-j7-exp3-colon_246	gccolon3	242
FECES-j14-exp3-colon_255	Sa_FECES-M3-j14-exp3-colon_SF_255.d	(02/23/17 00:00:00)	Sa_FECES-M3-j14-exp3-colon_SF_255	sfcolon3	245	Sa_FECES-M3-j14-exp3-colon_PA_255.d	(04/15/17 00:00:00)	Sa_FECES-M3-j14-exp3-colon_PA_255	pacolon3	246	Sa_FECES-M3-j14-exp3-colon_BA_255.d	(01/15/17 00:00:00)	Sa_FECES-M3-j14-exp3-colon_BA_255	bacolon3	75	Sa_FECES-M3-j14-exp3-colon_GCMRM_255.D	(02/08/17 00:00:00)	Sa_FECES-M3-j14-exp3-colon_255	gccolon3	245
St_SCFA-exp2-colon_pre	St_SCFA-exp2-colon_SF_2a.d	(02/17/17 00:00:00)	St_SCFA-exp2-colon_SF_2a	sfcolon2	1	-	(NA NA)	-	-	-	-	(NA NA)	-	-	-	-	(NA NA)	-	-	-
St_PA-exp1-colon_pre	-	(NA NA)	-	-	-	St_PA-exp1-colon_PA_2a.d	(04/12/17 00:00:00)	St_PA-exp1-colon_PA_2a	pacolon1	1	-	(NA NA)	-	-	-	-	(NA NA)	-	-	-
St_BA1-exp3-colon_pre	-	(NA NA)	-	-	-	-	(NA NA)	-	-	-	St_BA1-exp3-colon_BA_2a.d	(01/12/17 00:00:00)	St_BA1-exp3-colon_BA_2a	bacolon3	1	-	(NA NA)	-	-	-
St_AA-exp1-colon_pre	-	(NA NA)	-	-	-	-	(NA NA)	-	-	-	-	(NA NA)	-	-	-	St_AA-exp1-colon_GCMRM_3a.D	(01/24/17 00:00:00)	St_AA-exp1-colon_3a	gccolon1	1
St_BA2-exp3-colon_pre	-	(NA NA)	-	-	-	-	(NA NA)	-	-	-	St_BA2-exp3-colon_BA_3a.d	(01/12/17 00:00:00)	St_BA2-exp3-colon_BA_3a	bacolon3	2	-	(NA NA)	-	-	-
St_SCFA-exp2-colon_post	St_SCFA-exp2-colon_SF_2c.d	(02/20/17 00:00:00)	St_SCFA-exp2-colon_SF_2c	sfcolon2	77	-	(NA NA)	-	-	-	-	(NA NA)	-	-	-	-	(NA NA)	-	-	-
St_SCFA1-exp1-colon_pre	St_SCFA1-exp1-colon_SF_2a.d	(02/20/17 00:00:00)	St_SCFA1-exp1-colon_SF_2a	sfcolon1	78	-	(NA NA)	-	-	-	-	(NA NA)	-	-	-	-	(NA NA)	-	-	-
St_BA2-exp3-colon_post	-	(NA NA)	-	-	-	-	(NA NA)	-	-	-	St_BA2-exp3-colon_BA_3b.d	(01/15/17 00:00:00)	St_BA2-exp3-colon_BA_3b	bacolon3	79	-	(NA NA)	-	-	-
St_BA1-exp3-colon_post	-	(NA NA)	-	-	-	-	(NA NA)	-	-	-	St_BA1-exp3-colon_BA_2b.d	(01/15/17 00:00:00)	St_BA1-exp3-colon_BA_2b	bacolon3	80	-	(NA NA)	-	-	-
St_BA1-exp1-colon_pre	-	(NA NA)	-	-	-	-	(NA NA)	-	-	-	St_BA1-exp1-colon_BA_2a.d	(01/15/17 00:00:00)	St_BA1-exp1-colon_BA_2a	bacolon1	81	-	(NA NA)	-	-	-
St_BA2-exp1-colon_pre	-	(NA NA)	-	-	-	-	(NA NA)	-	-	-	St_BA2-exp1-colon_BA_3a.d	(01/15/17 00:00:00)	St_BA2-exp1-colon_BA_3a	bacolon1	82	-	(NA NA)	-	-	-
St_PA-exp1-colon_post	-	(NA NA)	-	-	-	St_PA-exp1-colon_PA_2c.d	(04/12/17 00:00:00)	St_PA-exp1-colon_PA_2c	pacolon1	96	-	(NA NA)	-	-	-	-	(NA NA)	-	-	-
St_AA-exp1-colon_post	-	(NA NA)	-	-	-	-	(NA NA)	-	-	-	-	(NA NA)	-	-	-	St_AA-exp1-colon_GCMRM_3b.D	(01/27/17 00:00:00)	St_AA-exp1-colon_3b	gccolon1	96
St_PA-exp2-colon_pre	-	(NA NA)	-	-	-	St_PA-exp2-colon_PA_2a.d	(04/12/17 00:00:00)	St_PA-exp2-colon_PA_2a	pacolon2	97	-	(NA NA)	-	-	-	-	(NA NA)	-	-	-
St_AA_exp2-colon_pre	-	(NA NA)	-	-	-	-	(NA NA)	-	-	-	-	(NA NA)	-	-	-	St_AA_exp2-colon_GCMRM_3a.D	(02/02/17 00:00:00)	St_AA_exp2-colon_3a	gccolon2	97
St_SCFA1-exp1-colon_post	St_SCFA1-exp1-colon_SF_2b.d	(02/23/17 00:00:00)	St_SCFA1-exp1-colon_SF_2b	sfcolon1	172	-	(NA NA)	-	-	-	-	(NA NA)	-	-	-	-	(NA NA)	-	-	-
St_SCFA-exp3-colon_pre	St_SCFA-exp3-colon_SF_2a.d	(02/23/17 00:00:00)	St_SCFA-exp3-colon_SF_2a	sfcolon3	173	-	(NA NA)	-	-	-	-	(NA NA)	-	-	-	-	(NA NA)	-	-	-
St_PA-exp2-colon_post	-	(NA NA)	-	-	-	St_PA-exp2-colon_PA_2c.d	(04/15/17 00:00:00)	St_PA-exp2-colon_PA_2c	pacolon2	173	-	(NA NA)	-	-	-	-	(NA NA)	-	-	-
St_AA_exp2-colon_post	-	(NA NA)	-	-	-	-	(NA NA)	-	-	-	-	(NA NA)	-	-	-	St_AA_exp2-colon_GCMRM_3b.D	(02/05/17 00:00:00)	St_AA_exp2-colon_3b	gccolon2	173
St_PA-exp3-colon_pre	-	(NA NA)	-	-	-	St_PA-exp3-colon_PA_2a.d	(04/15/17 00:00:00)	St_PA-exp3-colon_PA_2a	pacolon3	174	-	(NA NA)	-	-	-	-	(NA NA)	-	-	-
St_AA_exp3-colon_pre	-	(NA NA)	-	-	-	-	(NA NA)	-	-	-	-	(NA NA)	-	-	-	St_AA_exp3-colon_GCMRM_3a.D	(02/08/17 00:00:00)	St_AA_exp3-colon_3a	gccolon3	174
St_BA2-exp1-colon_post	-	(NA NA)	-	-	-	-	(NA NA)	-	-	-	St_BA2-exp1-colon_BA_3b.d	(01/18/17 00:00:00)	St_BA2-exp1-colon_BA_3b	bacolon1	178	-	(NA NA)	-	-	-
St_BA1-exp1-colon_post	-	(NA NA)	-	-	-	-	(NA NA)	-	-	-	St_BA1-exp1-colon_BA_2b.d	(01/18/17 00:00:00)	St_BA1-exp1-colon_BA_2b	bacolon1	179	-	(NA NA)	-	-	-
St_BA1-exp2-colon_pre	-	(NA NA)	-	-	-	-	(NA NA)	-	-	-	St_BA1-exp2-colon_BA_2a.d	(01/18/17 00:00:00)	St_BA1-exp2-colon_BA_2a	bacolon2	181	-	(NA NA)	-	-	-
St_BA2-exp2-colon_pre	-	(NA NA)	-	-	-	-	(NA NA)	-	-	-	St_BA2-exp2-colon_BA_3a.d	(01/18/17 00:00:00)	St_BA2-exp2-colon_BA_3a	bacolon2	182	-	(NA NA)	-	-	-
St_SCFA-exp3-colon_post	St_SCFA-exp3-colon_SF_2c.d	(02/23/17 00:00:00)	St_SCFA-exp3-colon_SF_2c	sfcolon3	248	-	(NA NA)	-	-	-	-	(NA NA)	-	-	-	-	(NA NA)	-	-	-
St_PA-exp3-colon_post	-	(NA NA)	-	-	-	St_PA-exp3-colon_PA_2c.d	(04/15/17 00:00:00)	St_PA-exp3-colon_PA_2c	pacolon3	249	-	(NA NA)	-	-	-	-	(NA NA)	-	-	-
St_AA_exp3-colon_post	-	(NA NA)	-	-	-	-	(NA NA)	-	-	-	-	(NA NA)	-	-	-	St_AA_exp3-colon_GCMRM_3b.D	(02/11/17 00:00:00)	St_AA_exp3-colon_3b	gccolon3	249
St_cadaverine-exp3-colon_7a	-	(NA NA)	-	-	-	St_cadaverine-exp3-colon_PA_7a.d	(04/15/17 00:00:00)	St_cadaverine-exp3-colon_PA_7a	pacolon3	250	-	(NA NA)	-	-	-	-	(NA NA)	-	-	-
St_BA2-exp2-colon_post	-	(NA NA)	-	-	-	-	(NA NA)	-	-	-	St_BA2-exp2-colon_BA_3b.d	(01/18/17 00:00:00)	St_BA2-exp2-colon_BA_3b	bacolon2	260	-	(NA NA)	-	-	-
St_BA1-exp2-colon_post	-	(NA NA)	-	-	-	-	(NA NA)	-	-	-	St_BA1-exp2-colon_BA_2b.d	(01/18/17 00:00:00)	St_BA1-exp2-colon_BA_2b	bacolon2	261	-	(NA NA)	-	-	-

## Sheet: VarInfos
Analyte	MetName	IsSTD	IsISO	RT	LevelAnnot	OriginalName	Class	MF	Mass	HMDB	KEGG	PC	Chebi	OGName	PCu	Method	SBR	myQC_CV_AreaQCCorr_2	myQC_Sum_SBR>5	myQC_Sum_Height>0	Analyte.sfcolon1	Analyte.sfcolon2	Analyte.sfcolon3	Analyte.pacolon1	Analyte.pacolon2	Analyte.pacolon3	Analyte.bacolon1	Analyte.bacolon2	Analyte.bacolon3	Analyte.gccolon1	Analyte.gccolon2	Analyte.gccolon3
12-dehydrocholic acid@5.38-ba	12-dehydrocholic acid	FALSE	FALSE	5.379	1	12-dehydrocholic acid	Steroids	C24H38O5	406.272	HMDB00400	C01292	94235	-	12-dehydrocholic acid	94235	ba	10	6.856	11	11	-	-	-	-	-	-	12-dehydrocholic acid@5.37-ba	12-dehydrocholic acid@5.27-ba	12-dehydrocholic acid@5.53-ba	-	-	-
2-hydroxybutyric acid@7.23-gc	2-hydroxybutyric acid	FALSE	FALSE	7.233	1	2-hydroxybutyric_acid	Organic acids	C4H8O3	104.047	HMDB00008	C05984	440864;11266	chebiId:1148;chebiId:50613	2-hydroxybutyric acid	11266	gc	63189	7.509	9	9	-	-	-	-	-	-	-	-	-	2-hydroxybutyric acid@7.22-gc	2-hydroxybutyric acid@7.23-gc	2-hydroxybutyric acid@7.24-gc
2-hydroxyglutaric acid@13.01-gc	2-hydroxyglutaric acid	FALSE	FALSE	13.009	1	2-hydroxyglutaric_acid	Organic acids	C5H8O5	148.037	HMDB00606;HMDB59655	C02630;C01087	43	chebiId:17084	2-hydroxyglutaric acid	43	gc	1179	7.44	9	9	-	-	-	-	-	-	-	-	-	2-hydroxyglutaric acid@13.01-gc	2-hydroxyglutaric acid@13.01-gc	2-hydroxyglutaric acid@13.00-gc
2-oxoglutaric acid@13.01-gc	2-oxoglutaric acid	FALSE	FALSE	13.011	1	2-oxoglutaric_acid	Organic acids	C5H6O5	146.022	HMDB00208	C00026	51	chebiId:30915	2-oxoglutaric acid	51	gc	100	22.582	9	9	-	-	-	-	-	-	-	-	-	2-oxoglutaric acid@13.01-gc	2-oxoglutaric acid@13.01-gc	2-oxoglutaric acid@13.01-gc
3-hydroxybutyric acid@7.41-gc	3-hydroxybutyric acid	FALSE	FALSE	7.406	1	3-hydroxybutyric_acid	Organic acids	C4H8O3	104.047	HMDB00357;HMDB00011	C01089	441;92135	chebiId:10983;chebiId:17066;chebiId:20067	3-hydroxybutyric acid	441	gc	932378	7.822	0	9	-	-	-	-	-	-	-	-	-	3-hydroxybutyric acid@7.40-gc	3-hydroxybutyric acid@7.41-gc	3-hydroxybutyric acid@7.41-gc
3-hydroxyisovaleric acid@7.82-gc	3-hydroxyisovaleric acid	FALSE	FALSE	7.824	1	3-hydroxyisovaleric_acid	Fatty Acyls	C5H10O3	118.063	HMDB00754	-	69362	chebiId:37084	3-hydroxyisovaleric acid	69362	gc	1351	9.419	9	9	-	-	-	-	-	-	-	-	-	3-hydroxyisovaleric acid@7.83-gc	3-hydroxyisovaleric acid@7.82-gc	3-hydroxyisovaleric acid@7.82-gc
3-methylhistidine@16.86-gc	3-methylhistidine	FALSE	FALSE	16.858	1	3-methylhistidine	Amino acids	C7H11N3O2	169.085	HMDB00479	C01152	64969;565965	chebiId:27596	3-methylhistidine	565965	gc	155	32.838	6	9	-	-	-	-	-	-	-	-	-	3-methylhistidine@16.86-gc	3-methylhistidine@16.86-gc	3-methylhistidine@16.85-gc
4-hydroxymandelic acid@15.23-gc	4-hydroxymandelic acid	FALSE	FALSE	15.226	1	4-hydroxymandelic_acid	Unclassified	C8H8O4	168.042	HMDB00822	C11527	328	chebiId:16388	4-hydroxymandelic acid	328	gc	100	7.25	9	9	-	-	-	-	-	-	-	-	-	4-hydroxymandelic acid@15.23-gc	4-hydroxymandelic acid@15.22-gc	4-hydroxymandelic acid@15.22-gc
4-hydroxyproline@12.44-gc	4-hydroxyproline	FALSE	FALSE	12.439	1	4-hydroxyproline	Amino acids	C5H9NO3	131.058	HMDB00725	C01157	825;5810;5238478	chebiId:18095	4-hydroxyproline	5238478	gc	1129	8.052	9	9	-	-	-	-	-	-	-	-	-	4-hydroxyproline@12.44-gc	4-hydroxyproline@12.44-gc	4-hydroxyproline@12.44-gc
5-aminovaleric acid@13.53-gc	5-aminovaleric acid	FALSE	FALSE	13.529	1	5-aminovaleric_acid	Amino acids	C5H11NO2	117.079	HMDB03355	C00431	138;6992101	chebiId:15887	5-aminovaleric acid	138	gc	199	10.238	9	9	-	-	-	-	-	-	-	-	-	5-aminovaleric acid@13.53-gc	5-aminovaleric acid@13.53-gc	5-aminovaleric acid@13.53-gc
5-oxoproline@12.35-gc	5-oxoproline	FALSE	FALSE	12.352	1	5-oxoproline	Amino acids	C5H7NO3	129.043	HMDB00805;HMDB00267	C02237;C01879	439685;499;7405	chebiId:16010;chebiId:16924;chebiId:18183	5-oxoproline	499	gc	61938	6.045	9	9	-	-	-	-	-	-	-	-	-	5-oxoproline@12.36-gc	5-oxoproline@12.35-gc	5-oxoproline@12.35-gc
7,12-dihydroxy-3-oxocholanoic acid@7.11-ba	7,12-dihydroxy-3-oxocholanoic acid	FALSE	FALSE	7.109	1	3-dehydrocholic acid	Steroids	C24H38O5	406.272	-	-	5283956	-	Dehydrocholic acid	5283956	ba	10	24.929	11	11	-	-	-	-	-	-	7,12-dihydroxy-3-oxocholanoic acid@7.11-ba	7,12-dihydroxy-3-oxocholanoic acid@6.92-ba	7,12-dihydroxy-3-oxocholanoic acid@7.37-ba	-	-	-
Acetic acid@1.78-sf	Acetic acid	FALSE	FALSE	1.776	1	Acetic_acid	Organic acids	C2H4O2	60.021	HMDB00042	C00033	176;21980959	chebiId:15366	Acetic acid	176	sf	100	0.778	8	8	Acetic acid@1.78-sf	Acetic acid@1.77-sf	Acetic acid@1.78-sf	-	-	-	-	-	-	-	-	-
Adenine@16.19-gc	Adenine	FALSE	FALSE	16.187	1	Adenine	Bases	C5H5N5	135.054	HMDB00034	C00147	190	chebiId:16708	Adenine	190	gc	236	9.28	9	9	-	-	-	-	-	-	-	-	-	Adenine@16.19-gc	Adenine@16.19-gc	Adenine@16.18-gc
Alanine@6.92-gc	Alanine	FALSE	FALSE	6.915	1	Alanine	Amino acids	C3H7NO2	89.048	HMDB01310;HMDB00161	C00133;C00041	71080;602;5950;7311724;57383916	chebiId:15570;chebiId:16977	Alanine	57383916	gc	351409	10.209	9	9	-	-	-	-	-	-	-	-	-	Alanine@6.91-gc	Alanine@6.92-gc	Alanine@6.92-gc
Allantoin@16.54-gc	Allantoin	FALSE	FALSE	16.543	1	Allantoin	Organic acids	C4H6N4O3	158.044	HMDB00462	C02350;C01551	204;439714	chebiId:15678	Allantoin	204	gc	100	18.971	9	9	-	-	-	-	-	-	-	-	-	Allantoin@16.55-gc	Allantoin@16.54-gc	Allantoin@16.54-gc
Alpha-muricholic acid@6.00-ba	Alpha-muricholic acid	FALSE	FALSE	5.998	1	Alpha-muricholic acid	Steroids	C24H40O5	408.288	HMDB00506	C17647	5283852;3083761	chebiId:81243	Alpha-muricholic acid	3083761	ba	11	11.053	11	11	-	-	-	-	-	-	Alpha-muricholic acid@6.00-ba	Alpha-muricholic acid@5.88-ba	Alpha-muricholic acid@6.12-ba	-	-	-
Alpha-tocopherol@29.51-gc	Alpha-tocopherol	FALSE	FALSE	29.512	1	Alpha-tocopherol	Prenols	C29H50O2	430.381	HMDB01893	C02477	14985;2116	chebiId:18145	Alpha-tocopherol	2116	gc	100	14.132	9	9	-	-	-	-	-	-	-	-	-	Alpha-tocopherol@29.52-gc	Alpha-tocopherol@29.51-gc	Alpha-tocopherol@29.51-gc
Anthranilic acid@13.43-gc	Anthranilic acid	FALSE	FALSE	13.426	1	Anthranilic_acid	Unclassified	C7H7NO2	137.048	HMDB01123	C00108	227;3734162	chebiId:30754	Anthranilic acid	227	gc	247	9.175	9	9	-	-	-	-	-	-	-	-	-	Anthranilic acid@13.43-gc	Anthranilic acid@13.43-gc	Anthranilic acid@13.42-gc
Arabinose@14.17-gc	Arabinose	FALSE	FALSE	14.174	1	Arabinose	Carbohydrates	C5H10O5	150.053	HMDB00646	C00216;C00259	66308;6902;439195	chebiId:17108;chebiId:46994	Arabinose	439195	gc	109	7.773	9	9	-	-	-	-	-	-	-	-	-	Arabinose@14.18-gc	Arabinose@14.17-gc	Arabinose@14.17-gc
Arabitol@14.82-gc	Arabitol	FALSE	FALSE	14.819	1	Arabitol	Carbohydrates	C5H12O5	152.068	HMDB01851;HMDB00568	C00532;C01904	439255;94154	chebiId:18403;chebiId:18333	Arabitol	439255	gc	100	7.428	9	9	-	-	-	-	-	-	-	-	-	Arabitol@14.82-gc	Arabitol@14.82-gc	Arabitol@14.81-gc
Arachidonic acid@23.75-gc	Arachidonic acid	FALSE	FALSE	23.754	1	Arachidonic_acid	Fatty Acyls	C20H32O2	304.24	HMDB01043	C00219	444899;231	chebiId:15843	Arachidonic acid	231	gc	749	14.352	9	9	-	-	-	-	-	-	-	-	-	Arachidonic acid@23.76-gc	Arachidonic acid@23.75-gc	Arachidonic acid@23.74-gc
Asparagine@14.13-gc	Asparagine	FALSE	FALSE	14.129	1	Asparagine	Amino acids	C4H8N2O3	132.053	HMDB00168	C00152	236;6267;5247114	chebiId:17196	Asparagine	236	gc	100	14.823	9	9	-	-	-	-	-	-	-	-	-	Asparagine@14.13-gc	Asparagine@14.13-gc	Asparagine@14.12-gc
Aspartic acid@12.37-gc	Aspartic acid	FALSE	FALSE	12.371	1	Aspartic_acid	Amino acids	C4H7NO4	133.038	HMDB06483;HMDB00191	C00402;C00049	83887;5960;424;23443619;57397078	chebiId:17364;chebiId:17053	Aspartic acid	23443619	gc	2032	8.256	9	9	-	-	-	-	-	-	-	-	-	Aspartic acid@12.38-gc	Aspartic acid@12.37-gc	Aspartic acid@12.37-gc
Behenic acid@26.41-gc	Behenic acid	FALSE	FALSE	26.413	1	Behenic_acid	Fatty Acyls	C22H44O2	340.334	HMDB00944	C08281	8215	chebiId:23858;chebiId:28941	Behenic acid	8215	gc	4794	10.475	9	9	-	-	-	-	-	-	-	-	-	Behenic acid@26.42-gc	Behenic acid@26.41-gc	Behenic acid@26.41-gc
Benzoic acid@8.76-gc	Benzoic acid	FALSE	FALSE	8.763	1	Benzoic_acid	Unclassified	C7H6O2	122.037	HMDB01870	C00180	243;20144841	chebiId:30746	Benzoic acid	20144841	gc	556295	9.744	0	9	-	-	-	-	-	-	-	-	-	Benzoic acid@8.76-gc	Benzoic acid@8.76-gc	Benzoic acid@8.76-gc
Beta-alanine@11.16-gc	Beta-alanine	FALSE	FALSE	11.16	1	Beta-alanine	Amino acids	C3H7NO2	89.048	HMDB00056	C00099	239;4755801	chebiId:16958	Beta-alanine	239	gc	1018	7.233	9	9	-	-	-	-	-	-	-	-	-	Beta-alanine@11.16-gc	Beta-alanine@11.16-gc	Beta-alanine@11.15-gc
Beta-hydroxypyruvic acid@5.45-gc	Beta-hydroxypyruvic acid	FALSE	FALSE	5.447	1	Beta-hydroxypyruvic acid	Organic acids	C3H4O4	104.011	HMDB01352	C00168	964	chebiId:30841	Beta-hydroxypyruvic acid	964	gc	1594523	13.387	0	9	-	-	-	-	-	-	-	-	-	Beta-hydroxypyruvic acid@5.45-gc	Beta-hydroxypyruvic acid@5.45-gc	Beta-hydroxypyruvic acid@5.44-gc
Beta-muricholic acid@6.27-ba	Beta-muricholic acid	FALSE	FALSE	6.274	1	Beta-muricholic acid	Steroids	C24H40O5	408.288	HMDB00415	C17726	5283853;3083762	chebiId:81298	Beta-muricholic acid	3083762	ba	10	7.958	11	11	-	-	-	-	-	-	Beta-muricholic acid@6.27-ba	Beta-muricholic acid@6.15-ba	Beta-muricholic acid@6.42-ba	-	-	-
Butanoic acid@5.24-sf	Butanoic acid	FALSE	FALSE	5.243	1	Butanoic_acid	Fatty Acyls	C4H8O2	88.052	HMDB00039	C00246	264	chebiId:30772	Butanoic acid	264	sf	100	1.342	8	8	Butanoic acid@5.26-sf	Butanoic acid@5.24-sf	Butanoic acid@5.22-sf	-	-	-	-	-	-	-	-	-
Cadaverine@4.45-pa	Cadaverine	FALSE	FALSE	4.449	1	Cadaverine	Unclassified	C5H14N2	102.116	HMDB02322	C01672	273	chebiId:18127	Cadaverine	273	pa	10	34.636	9	9	-	-	-	Cadaverine@4.46-pa	Cadaverine@4.42-pa	Cadaverine@4.49-pa	-	-	-	-	-	-
Capric acid@11.44-gc	Capric acid	FALSE	FALSE	11.444	1	Capric_acid	Fatty Acyls	C10H20O2	172.146	HMDB00511	C01571	2969	chebiId:30813	Capric acid	2969	gc	194602	5.086	0	9	-	-	-	-	-	-	-	-	-	Capric acid@11.45-gc	Capric acid@11.44-gc	Capric acid@11.44-gc
Caprylic acid@8.95-gc	Caprylic acid	FALSE	FALSE	8.949	1	Caprylic_acid	Fatty Acyls	C8H16O2	144.115	HMDB00482	C06423	379	chebiId:28837	Caprylic acid	379	gc	339472	4.033	0	9	-	-	-	-	-	-	-	-	-	Caprylic acid@8.95-gc	Caprylic acid@8.95-gc	Caprylic acid@8.95-gc
Chenodeoxycholic acid@10.32-ba	Chenodeoxycholic acid	FALSE	FALSE	10.318	1	Chenodeoxycholic acid	Steroids	C24H40O4	392.293	HMDB00518	C02528	10133	chebiId:16755	Chenodeoxycholic acid	10133	ba	13	20.424	11	11	-	-	-	-	-	-	Chenodeoxycholic acid@10.32-ba	Chenodeoxycholic acid@10.25-ba	Chenodeoxycholic acid@10.42-ba	-	-	-
Cholesterol@29.51-gc	Cholesterol	FALSE	FALSE	29.513	1	Cholesterol	Steroids	C27H46O	386.355	HMDB00067	C00187	6432564;5997	chebiId:16113	Cholesterol	5997	gc	698	6.658	9	9	-	-	-	-	-	-	-	-	-	Cholesterol@29.51-gc	Cholesterol@29.51-gc	Cholesterol@29.50-gc
Cholic acid@9.13-ba	Cholic acid	FALSE	FALSE	9.13	1	Cholic acid	Steroids	C24H40O5	408.288	HMDB00619	C00695;C01558	221493;303;439520	chebiId:16359;chebiId:22868;chebiId:3098	Cholic acid	303	ba	62	6.965	11	11	-	-	-	-	-	-	Cholic acid@9.13-ba	Cholic acid@9.07-ba	Cholic acid@9.21-ba	-	-	-
Citric acid;Isocitric acid@15.81-gc	Citric acid;Isocitric acid	FALSE	FALSE	15.81	1	Citric_acid__Isocitric_acid	Organic acids	C6H8O7	192.027	HMDB00094;HMDB00193	C00158;C00311	311;19782904;88113319;1198	chebiId:30769;chebiId:30887	Citric acid;Isocitric acid	19782904;1198	gc	9313	31.303	5	9	-	-	-	-	-	-	-	-	-	Citric acid;Isocitric acid@15.81-gc	Citric acid;Isocitric acid@15.81-gc	Citric acid;Isocitric acid@15.81-gc
Citrulline@15.78-gc	Citrulline	FALSE	FALSE	15.777	1	Citrulline	Amino acids	C6H13N3O3	175.096	HMDB00904	C00327	833;9750;25244873	chebiId:16349	Citrulline	25244873	gc	428	17.643	9	9	-	-	-	-	-	-	-	-	-	Citrulline@15.78-gc	Citrulline@15.78-gc	Citrulline@15.77-gc
Creatine@12.80-gc	Creatine	FALSE	FALSE	12.801	1	Creatine	Amino acids	C4H9N3O2	131.069	HMDB00064	C00300	586	chebiId:16919	Creatine	586	gc	133	5.293	9	9	-	-	-	-	-	-	-	-	-	Creatine@12.80-gc	Creatine@12.80-gc	Creatine@12.80-gc
Cytosine@12.37-gc	Cytosine	FALSE	FALSE	12.372	1	Cytosine	Bases	C4H5N3O	111.043	HMDB00630	C00380	597	chebiId:16040	Cytosine	597	gc	186	7.983	9	9	-	-	-	-	-	-	-	-	-	Cytosine@12.38-gc	Cytosine@12.37-gc	Cytosine@12.37-gc
Deoxycholic acid@10.54-ba	Deoxycholic acid	FALSE	FALSE	10.539	1	Deoxycholic acid	Steroids	C24H40O4	392.293	HMDB00626	C11171;C04483	222528;2987;23668196	chebiId:9177;chebiId:28834	Deoxycholic acid	2987	ba	108	14.753	11	11	-	-	-	-	-	-	Deoxycholic acid@10.54-ba	Deoxycholic acid@10.46-ba	Deoxycholic acid@10.64-ba	-	-	-
Dimethylglycine@5.45-gc	Dimethylglycine	FALSE	FALSE	5.445	1	Dimethylglycine	Amino acids	C4H9NO2	103.063	HMDB00092	C01026	673	chebiId:17724	Dimethylglycine	673	gc	2905976	15.185	0	9	-	-	-	-	-	-	-	-	-	Dimethylglycine@5.45-gc	Dimethylglycine@5.45-gc	Dimethylglycine@5.45-gc
Erythritol@12.29-gc	Erythritol	FALSE	FALSE	12.295	1	Erythritol	Carbohydrates	C4H10O4	122.058	HMDB02994	C00503	222285;8998	chebiId:17113;chebiId:48299	Erythritol	8998	gc	228	7.226	9	9	-	-	-	-	-	-	-	-	-	Erythritol@12.30-gc	Erythritol@12.29-gc	Erythritol@12.29-gc
Ferulic acid@19.20-gc	Ferulic acid	FALSE	FALSE	19.203	1	Ferulic_acid	Flavonoids	C10H10O4	194.058	HMDB00537;HMDB00954	C01494	445858;709	chebiId:17620	Ferulic acid	445858	gc	100	5.93	9	9	-	-	-	-	-	-	-	-	-	Ferulic acid@19.20-gc	Ferulic acid@19.20-gc	Ferulic acid@19.19-gc
Fructose@16.48-gc	Fructose	FALSE	FALSE	16.484	1	Fructose	Carbohydrates	C6H12O6	180.063	HMDB00660	C00095;C02336	5984;439163;439709	chebiId:15824;chebiId:37721;chebiId:28645	Fructose	439163	gc	929	7.881	9	9	-	-	-	-	-	-	-	-	-	Fructose@16.49-gc	Fructose@16.49-gc	Fructose@16.48-gc
Fumaric acid@10.06-gc	Fumaric acid	FALSE	FALSE	10.064	1	Fumaric_acid	Organic acids	C4H4O4	116.011	HMDB00134	C00122	444972	chebiId:18012	Fumaric acid	444972	gc	24728	14.368	9	9	-	-	-	-	-	-	-	-	-	Fumaric acid@10.06-gc	Fumaric acid@10.06-gc	Fumaric acid@10.06-gc
GABA@12.44-gc	GABA	FALSE	FALSE	12.443	1	GABA	Amino acids	C4H9NO2	103.063	HMDB00112	C00334	119;6992099	chebiId:16865	GABA	119	gc	468	6.754	9	9	-	-	-	-	-	-	-	-	-	GABA@12.44-gc	GABA@12.44-gc	GABA@12.44-gc
Galactitol;Sorbitol;Mannitol@17.29-gc	Galactitol;Sorbitol;Mannitol	FALSE	FALSE	17.29	1	Galactitol__Sorbitol__Mannitol	Carbohydrates	C6H14O6	182.079	HMDB00107;HMDB00765;HMDB00247	C01697;C00392;C00794	11850;6251;5780	chebiId:16813;chebiId:16899;chebiId:17924	Galactitol;Mannitol;Sorbitol	11850;6251;5780	gc	126	9.141	9	9	-	-	-	-	-	-	-	-	-	Galactitol;Sorbitol;Mannitol@17.29-gc	Galactitol;Sorbitol;Mannitol@17.29-gc	Galactitol;Sorbitol;Mannitol@17.29-gc
Galactose;Glucose;Mannose@17.01-gc	Galactose;Glucose;Mannose	FALSE	FALSE	17.013	1	Galactose__Glucose__Mannose	Carbohydrates	C6H12O6	180.063	HMDB00143;HMDB33704;HMDB00122;HMDB03345;HMDB00516;HMDB00169	C00124;C01582;C00984;C01825;C00031;C00267;C00221;C00159	439357;6036;3037556;12003287;79025;5793;206;64689;161658;18950	chebiId:4139;chebiId:28061;chebiId:28260;chebiId:42905;chebiId:4167;chebiId:17925;chebiId:15903;chebiId:4208	Galactose;Glucose;Mannose	12003287;206;161658	gc	620	10.456	9	9	-	-	-	-	-	-	-	-	-	Galactose;Glucose;Mannose@17.01-gc	Galactose;Glucose;Mannose@17.01-gc	Galactose;Glucose;Mannose@17.01-gc
Glucose-6-phosphate;Fructose-6-phosphate@23.83-gc	Glucose-6-phosphate;Fructose-6-phosphate	FALSE	FALSE	23.827	1	Glucose-6-phosphate__Fructose-6-phosphate	Carbohydrates	C6H13O9P	260.03	HMDB00124;HMDB03971;HMDB01401;HMDB03498	C05345;C00085;C00668;C00092;C01172	69507;440641;439160;5958;208;439284;439427	chebiId:16084;chebiId:15946;chebiId:61553;chebiId:17665;chebiId:4170;chebiId:17719	Fructose-6-phosphate;Glucose-6-phosphate	439160;208	gc	100	16.051	9	9	-	-	-	-	-	-	-	-	-	Glucose-6-phosphate;Fructose-6-phosphate@23.83-gc	Glucose-6-phosphate;Fructose-6-phosphate@23.83-gc	Glucose-6-phosphate;Fructose-6-phosphate@23.82-gc
Glutamic acid@13.53-gc	Glutamic acid	FALSE	FALSE	13.532	1	Glutamic_acid	Amino acids	C5H9NO4	147.053	HMDB03339;HMDB00148	C00025;C00302;C00217	611;33032;57397101;23327	chebiId:16015;chebiId:15966;chebiId:18327	Glutamic acid	57397101	gc	3332	9.093	9	9	-	-	-	-	-	-	-	-	-	Glutamic acid@13.54-gc	Glutamic acid@13.53-gc	Glutamic acid@13.53-gc
Glutamine@15.23-gc	Glutamine	FALSE	FALSE	15.234	1	Glutamine	Amino acids	C5H10N2O3	146.069	HMDB00641;HMDB03423	C00064;C00819	5961;145815;25244553;738	chebiId:18050;chebiId:17061	Glutamine	25244553	gc	240	12.135	9	9	-	-	-	-	-	-	-	-	-	Glutamine@15.24-gc	Glutamine@15.23-gc	Glutamine@15.23-gc
Glyceric acid@9.96-gc	Glyceric acid	FALSE	FALSE	9.958	1	Glyceric_acid	Carbohydrates	C3H6O4	106.027	HMDB00139	C00258	752;439194	chebiId:32398	Glyceric acid	752	gc	7023	6.646	9	9	-	-	-	-	-	-	-	-	-	Glyceric acid@9.96-gc	Glyceric acid@9.96-gc	Glyceric acid@9.96-gc
Glycerol@9.20-gc	Glycerol	FALSE	FALSE	9.201	1	Glycerol	Carbohydrates	C3H8O3	92.047	HMDB00131	C00116	753	chebiId:17754	Glycerol	753	gc	311467	5.992	9	9	-	-	-	-	-	-	-	-	-	Glycerol@9.20-gc	Glycerol@9.20-gc	Glycerol@9.20-gc
Glycerol-3-phosphate@15.22-gc	Glycerol-3-phosphate	FALSE	FALSE	15.222	1	Glycerol-3-phosphate	Lipids	C3H9O6P	172.014	HMDB00126	C00093	754;439162	chebiId:15978	Glycerol-3-phosphate	754	gc	248	9.358	9	9	-	-	-	-	-	-	-	-	-	Glycerol-3-phosphate@15.23-gc	Glycerol-3-phosphate@15.22-gc	Glycerol-3-phosphate@15.22-gc
Glycine@9.61-gc	Glycine	FALSE	FALSE	9.608	1	Glycine	Amino acids	C2H5NO2	75.032	HMDB00123	C00037	750;5257127	chebiId:15428	Glycine	5257127	gc	16173	6.725	9	9	-	-	-	-	-	-	-	-	-	Glycine@9.61-gc	Glycine@9.61-gc	Glycine@9.61-gc
Glycocholic acid@5.86-ba	Glycocholic acid	FALSE	FALSE	5.861	1	Glycocholic acid	Steroids	C26H43NO6	465.309	HMDB00138	C01921	10140;23617285;755	chebiId:17687	Glycocholic acid	755	ba	17	33.992	11	11	-	-	-	-	-	-	Glycocholic acid@5.86-ba	Glycocholic acid@5.75-ba	Glycocholic acid@6.01-ba	-	-	-
Glycodeoxycholic acid@9.44-ba	Glycodeoxycholic acid	FALSE	FALSE	9.443	1	Glycodeoxycholic acid	Steroids	C26H43NO5	449.314	HMDB00631	C05464	3035026;22833539	chebiId:27471	Glycodeoxycholic acid	22833539	ba	10	38.315	11	11	-	-	-	-	-	-	Glycodeoxycholic acid@9.44-ba	Glycodeoxycholic acid@9.39-ba	Glycodeoxycholic acid@9.50-ba	-	-	-
Glycolic acid@6.25-gc	Glycolic acid	FALSE	FALSE	6.253	1	Glycolic_acid	Organic acids	C2H4O3	76.016	HMDB00115	C00160	757;3698251	chebiId:17497	Glycolic acid	3698251	gc	314521	6.389	0	9	-	-	-	-	-	-	-	-	-	Glycolic acid@6.25-gc	Glycolic acid@6.25-gc	Glycolic acid@6.25-gc
Guanine@19.95-gc	Guanine	FALSE	FALSE	19.952	1	Guanine	Bases	C5H5N5O	151.049	HMDB00132	C00242	764	chebiId:16235	Guanine	764	gc	100	6.834	9	9	-	-	-	-	-	-	-	-	-	Guanine@19.96-gc	Guanine@19.95-gc	Guanine@19.95-gc
Guanosine@27.38-gc	Guanosine	FALSE	FALSE	27.377	1	Guanosine	Nucleosides	C10H13N5O5	283.092	HMDB00133	C00387	6802;765	chebiId:16750	Guanosine	765	gc	6270	39.25	9	9	-	-	-	-	-	-	-	-	-	Guanosine@27.38-gc	Guanosine@27.38-gc	Guanosine@27.36-gc
Hippuric acid@15.87-gc	Hippuric acid	FALSE	FALSE	15.865	1	Hippuric_acid	Unclassified	C9H9NO3	179.058	HMDB00714	C01586	464	chebiId:18089	Hippuric acid	464	gc	847	28.262	9	9	-	-	-	-	-	-	-	-	-	Hippuric acid@15.87-gc	Hippuric acid@15.87-gc	Hippuric acid@15.86-gc
Histidine@16.85-gc	Histidine	FALSE	FALSE	16.853	1	Histidine	Amino acids	C6H9N3O2	155.069	HMDB00177	C00135	6274;773;3651426	-	Histidine	3651426	gc	470	16.727	9	9	-	-	-	-	-	-	-	-	-	Histidine@16.86-gc	Histidine@16.85-gc	Histidine@16.85-gc
Homoserine@10.36-gc	Homoserine	FALSE	FALSE	10.361	1	Homoserine	Amino acids	C4H9NO3	119.058	HMDB00719	C00263	12647;1502076;779;25245858;193314	chebiId:15699	Homoserine	193314	gc	18923	11.169	9	9	-	-	-	-	-	-	-	-	-	Homoserine@10.37-gc	Homoserine@10.36-gc	Homoserine@10.36-gc
Hyocholic acid@8.24-ba	Hyocholic acid	FALSE	FALSE	8.236	1	Hyocholic acid	Steroids	C24H40O5	408.288	HMDB00760	C17649	92805	chebiId:81244	Hyocholate;Hyocholic acid;Iocholic acid;gamma-Muricholate;alpha-Hyocholic acid;3alpha,6alpha,7alpha-Trihydroxy-5beta-cholan-24-oic acid;6alpha-Hydroxychenodeoxycholic acid	92805	ba	10	6.436	11	11	-	-	-	-	-	-	Hyocholic acid@8.23-ba	Hyocholic acid@8.00-ba	Hyocholic acid@8.47-ba	-	-	-
Hyodeoxycholic acid@9.26-ba	Hyodeoxycholic acid	FALSE	FALSE	9.261	1	Hyodeoxycholic acid	Steroids	C24H40O4	392.293	HMDB00733	-	9963687;227033	-	Hyodeoxycholic acid	227033	ba	31	12.387	11	11	-	-	-	-	-	-	Hyodeoxycholic acid@9.26-ba	Hyodeoxycholic acid@9.21-ba	Hyodeoxycholic acid@9.31-ba	-	-	-
Hypotaurine@13.29-gc	Hypotaurine	FALSE	FALSE	13.29	1	Hypotaurine	Organic acids	C2H7NO2S	109.02	HMDB00965	C00519	107812;25244088	chebiId:16668	Hypotaurine	107812	gc	100	8.053	9	9	-	-	-	-	-	-	-	-	-	Hypotaurine@13.29-gc	Hypotaurine@13.29-gc	Hypotaurine@13.29-gc
Hypoxanthine@15.55-gc	Hypoxanthine	FALSE	FALSE	15.547	1	Hypoxanthine	Bases	C5H4N4O	136.039	HMDB00157	C00262	790	chebiId:17368	Hypoxanthine	790	gc	261	7.535	9	9	-	-	-	-	-	-	-	-	-	Hypoxanthine@15.55-gc	Hypoxanthine@15.55-gc	Hypoxanthine@15.55-gc
Indole-3-acrylic acid@9.71-pa	Indole-3-acrylic acid	FALSE	FALSE	9.709	1	Indole-3-acrylic_acid	Indoles	C11H9NO2	187.063	HMDB00734	-	15030923	-	Indole-3-acrylic acid	15030923	pa	10	70.837	5	9	-	-	-	Indole-3-acrylic acid@9.71-pa	Indole-3-acrylic acid@9.72-pa	Indole-3-acrylic acid@9.68-pa	-	-	-	-	-	-
Inosine@24.89-gc	Inosine	FALSE	FALSE	24.892	1	Inosine	Nucleosides	C10H12N4O5	268.081	HMDB00195	C00294	6021	chebiId:17596	Inosine	6021	gc	100	7.436	9	9	-	-	-	-	-	-	-	-	-	Inosine@24.90-gc	Inosine@24.89-gc	Inosine@24.89-gc
Inositol@19.64-gc	Inositol	FALSE	FALSE	19.638	1	Inositol	Unclassified	C6H12O6	180.063	HMDB06088;HMDB00211	C06153;C00137;C19891	892	chebiId:10642;chebiId:17268	Inositol	892	gc	3040	8.085	9	9	-	-	-	-	-	-	-	-	-	Inositol@19.64-gc	Inositol@19.64-gc	Inositol@19.63-gc
Isobutyric acid@4.86-sf	Isobutyric acid	FALSE	FALSE	4.856	1	Isobutyric_acid	Organic acids	C4H8O2	88.052	HMDB01873	C02632	6590	chebiId:16135	Isobutyric acid	6590	sf	100	2.17	8	8	Isobutyric acid@4.88-sf	Isobutyric acid@4.85-sf	Isobutyric acid@4.84-sf	-	-	-	-	-	-	-	-	-
Isoleucine@9.44-gc	Isoleucine	FALSE	FALSE	9.437	1	Isoleucine	Amino acids	C6H13NO2	131.095	HMDB00172	C00407	791;6306	chebiId:17191	Isoleucine	791	gc	16740	12.605	9	9	-	-	-	-	-	-	-	-	-	Isoleucine@9.44-gc	Isoleucine@9.44-gc	Isoleucine@9.44-gc
Isovaleric acid@9.02-sf	Isovaleric acid	FALSE	FALSE	9.017	1	Isovaleric_acid	Fatty Acyls	C5H10O2	102.068	HMDB00718	C08262	10430	chebiId:28484	Isovaleric acid	10430	sf	100	9.457	8	8	Isovaleric acid@9.02-sf	Isovaleric acid@9.02-sf	Isovaleric acid@8.99-sf	-	-	-	-	-	-	-	-	-
Ketoisocaproic acid@8.37-gc	Ketoisocaproic acid	FALSE	FALSE	8.367	1	Ketoisocaproic_acid	Organic acids	C6H10O3	130.063	HMDB00695	C00233	70	chebiId:48430	Ketoisocaproic acid	70	gc	100	14.938	6	9	-	-	-	-	-	-	-	-	-	Ketoisocaproic acid@8.36-gc	Ketoisocaproic acid@8.37-gc	Ketoisocaproic acid@8.37-gc
Ketoisovaleric acid@7.34-gc	Ketoisovaleric acid	FALSE	FALSE	7.339	1	Ketoisovaleric_acid	Organic acids	C5H8O3	116.047	HMDB00019	C00141	49	chebiId:11851;chebiId:16530	Ketoisovaleric acid	49	gc	100	11.483	9	9	-	-	-	-	-	-	-	-	-	Ketoisovaleric acid@7.33-gc	Ketoisovaleric acid@7.34-gc	Ketoisovaleric acid@7.34-gc
Kynurenine@21.15-gc	Kynurenine	FALSE	FALSE	21.148	1	Kynurenine	Unclassified	C10H12N2O3	208.085	HMDB00684	C00328	846;161166;25245862	chebiId:16946	Kynurenine	25245862	gc	100	11.725	9	9	-	-	-	-	-	-	-	-	-	Kynurenine@21.15-gc	Kynurenine@21.15-gc	Kynurenine@21.14-gc
Lactic acid@6.39-gc	Lactic acid	FALSE	FALSE	6.395	1	Lactic_acid	Organic acids	C3H6O3	90.032	HMDB01311;HMDB00190	C00256;C00186	61503;107689;19789253;612	chebiId:341;chebiId:42111;chebiId:422	Lactic acid	19789253	gc	1154506	4.62	9	9	-	-	-	-	-	-	-	-	-	Lactic acid@6.38-gc	Lactic acid@6.40-gc	Lactic acid@6.41-gc
Lactose@27.26-gc	Lactose	FALSE	FALSE	27.264	1	Lactose	Carbohydrates	C12H22O11	342.116	HMDB00186	C00243	84571;440995	chebiId:17716	Lactose	440995	gc	558	14.391	9	9	-	-	-	-	-	-	-	-	-	Lactose@27.26-gc	Lactose@27.26-gc	Lactose@27.26-gc
Lauric acid@13.77-gc	Lauric acid	FALSE	FALSE	13.766	1	Lauric_acid	Fatty Acyls	C12H24O2	200.178	HMDB00638	C02679	3893	chebiId:30805	Lauric acid	3893	gc	255292	2.827	0	9	-	-	-	-	-	-	-	-	-	Lauric acid@13.77-gc	Lauric acid@13.77-gc	Lauric acid@13.76-gc
Leucine@9.15-gc	Leucine	FALSE	FALSE	9.146	1	Leucine	Amino acids	C6H13NO2	131.095	HMDB00687	C00123	6106;857;5255803	chebiId:15603	Leucine	5255803	gc	13798	10.469	9	9	-	-	-	-	-	-	-	-	-	Leucine@9.15-gc	Leucine@9.15-gc	Leucine@9.14-gc
Linoleic acid@21.23-gc	Linoleic acid	FALSE	FALSE	21.234	1	Linoleic_acid	Fatty Acyls	C18H32O2	280.24	HMDB00673	C01595	5280450;3931	chebiId:17351	Linoleic acid	3931	gc	236298	8.292	9	9	-	-	-	-	-	-	-	-	-	Linoleic acid@21.24-gc	Linoleic acid@21.23-gc	Linoleic acid@21.23-gc
Lithocholic acid@11.10-ba	Lithocholic acid	FALSE	FALSE	11.103	1	Lithocholic acid	Steroids	C24H40O3	376.298	HMDB00761	C03990	11740284;9903	chebiId:16325	Lithocholic acid	11740284	ba	12	23.624	11	11	-	-	-	-	-	-	Lithocholic acid@11.10-ba	Lithocholic acid@11.08-ba	Lithocholic acid@11.14-ba	-	-	-
Lysine@16.85-gc	Lysine	FALSE	FALSE	16.848	1	Lysine	Amino acids	C6H14N2O2	146.106	HMDB03405;HMDB00182	C00739;C00047	57449;5962;866;5248709	chebiId:16855;chebiId:18019	Lysine	5248709	gc	1725	12.31	9	9	-	-	-	-	-	-	-	-	-	Lysine@16.85-gc	Lysine@16.85-gc	Lysine@16.84-gc
Malic acid@11.98-gc	Malic acid	FALSE	FALSE	11.98	1	Malic_acid	Organic acids	C4H6O5	134.022	HMDB00156;HMDB00744	C00149;C00711	525;20130941;222656	chebiId:30797;chebiId:6650	Malic acid	20130941	gc	629	8.711	9	9	-	-	-	-	-	-	-	-	-	Malic acid@11.98-gc	Malic acid@11.98-gc	Malic acid@11.97-gc
Malonic acid@8.22-gc	Malonic acid	FALSE	FALSE	8.224	1	Malonic_acid	Organic acids	C3H4O4	104.011	HMDB00691	C00383	867;23511544	chebiId:30794	Malonic acid	23511544	gc	100	14.264	9	9	-	-	-	-	-	-	-	-	-	Malonic acid@8.22-gc	Malonic acid@8.22-gc	Malonic acid@8.23-gc
Maltose;Trehalose@27.59-gc	Maltose;Trehalose	FALSE	FALSE	27.588	1	Maltose__Trehalose	Carbohydrates	C12H22O11	342.116	HMDB00163;HMDB00975	C00208;C01083	439341;6255;439186;294;7427;1143	chebiId:17306;chebiId:16551	Maltose;Trehalose	294;1143	gc	452	9.891	9	9	-	-	-	-	-	-	-	-	-	Maltose;Trehalose@27.59-gc	Maltose;Trehalose@27.59-gc	Maltose;Trehalose@27.58-gc
Margaric acid@19.96-gc	Margaric acid	FALSE	FALSE	19.959	1	Margaric_acid	Fatty Acyls	C17H34O2	270.256	HMDB02259	-	10465	-	Margaric acid	10465	gc	48821	9.142	4	9	-	-	-	-	-	-	-	-	-	Margaric acid@19.96-gc	Margaric acid@19.96-gc	Margaric acid@19.95-gc
Methionine@12.31-gc	Methionine	FALSE	FALSE	12.312	1	Methionine	Amino acids	C5H11NO2S	149.051	HMDB00696	C00073	6137;876;5255805	chebiId:16643	Methionine	5255805	gc	1252	8.373	9	9	-	-	-	-	-	-	-	-	-	Methionine@12.32-gc	Methionine@12.31-gc	Methionine@12.31-gc
Methylsuccinic acid@9.81-gc	Methylsuccinic acid	FALSE	FALSE	9.809	1	Methylsuccinic_acid	Fatty Acyls	C5H8O4	132.042	HMDB01844	-	10349	-	Methylsuccinic acid	10349	gc	9177	15.082	5	9	-	-	-	-	-	-	-	-	-	Methylsuccinic acid@9.81-gc	Methylsuccinic acid@9.81-gc	Methylsuccinic acid@9.81-gc
Murideoxycholic acid@7.25-ba	Murideoxycholic acid	FALSE	FALSE	7.247	1	Murideoxycholic acid	Steroids	C24H40O4	392.293	HMDB00811	C15515	5283821	CHEBI:52030	Murocholic acid	5283821	ba	19	12.911	11	11	-	-	-	-	-	-	Murideoxycholic acid@7.25-ba	Murideoxycholic acid@7.07-ba	Murideoxycholic acid@7.45-ba	-	-	-
Myristic acid@15.88-gc	Myristic acid	FALSE	FALSE	15.879	1	Myristic_acid	Fatty Acyls	C14H28O2	228.209	HMDB00806	C06424	11005	chebiId:28875;chebiId:30807	Myristic acid	11005	gc	1306297	6.202	0	9	-	-	-	-	-	-	-	-	-	Myristic acid@15.88-gc	Myristic acid@15.88-gc	Myristic acid@15.88-gc
N-acetylaspartic acid@14.14-gc	N-acetylaspartic acid	FALSE	FALSE	14.137	1	N-acetylaspartic_acid	Amino acids	C6H9NO5	175.048	HMDB00812	C01042	65065;97508	chebiId:16953;chebiId:21547	N-acetylaspartic acid	97508	gc	100	22.627	9	9	-	-	-	-	-	-	-	-	-	N-acetylaspartic acid@14.14-gc	N-acetylaspartic acid@14.14-gc	N-acetylaspartic acid@14.13-gc
N-acetylputrescine@2.96-pa	N-acetylputrescine	FALSE	FALSE	2.96	1	N-acetylputrescine	Organic acids	C6H14N2O	130.111	HMDB02064	C02714	122356	chebiId:17768	N-acetylputrescine	122356	pa	10	8.508	9	9	-	-	-	N-acetylputrescine@2.93-pa	N-acetylputrescine@2.97-pa	N-acetylputrescine@3.02-pa	-	-	-	-	-	-
N-propylamine@5.83-gc	N-propylamine	FALSE	FALSE	5.835	1	N-propylamine	Unclassified	C3H9N	59.074	HMDB34006	-	7852	-	N-propylamine	7852	gc	15707	7.614	0	9	-	-	-	-	-	-	-	-	-	N-propylamine@5.84-gc	N-propylamine@5.83-gc	N-propylamine@5.83-gc
N1-acetylspermidine@5.29-pa	N1-acetylspermidine	FALSE	FALSE	5.285	1	N1-acetylspermidine	Amino acids	C9H21N3O	187.168	HMDB01276	C00612	496	chebiId:17927	N-acetylspermine	496	pa	10	6.887	9	9	-	-	-	N1-acetylspermidine@5.29-pa	N1-acetylspermidine@5.29-pa	N1-acetylspermidine@5.27-pa	-	-	-	-	-	-
N1-acetylspermine@6.70-pa	N1-acetylspermine	FALSE	FALSE	6.7	1	N-acetylspermine	Amino acids	C12H28N4O	244.226	HMDB01186	C02567	916	chebiId:17312	N-acetylspermine	916	pa	10	10.062	9	9	-	-	-	N1-acetylspermine@6.69-pa	N1-acetylspermine@6.73-pa	N1-acetylspermine@6.70-pa	-	-	-	-	-	-
N1,N12-diacetylspermine@5.67-pa	N1,N12-diacetylspermine	FALSE	FALSE	5.666	1	N1-N12-diacetylspermine	Amino acids	C14H30N4O2	286.237	HMDB02172;HMDB41876	C03413	132679;132680	chebiId:28101	N1,N12-diacetylspermine	132680	pa	10	4.42	9	9	-	-	-	N1,N12-diacetylspermine@5.68-pa	N1,N12-diacetylspermine@5.67-pa	N1,N12-diacetylspermine@5.65-pa	-	-	-	-	-	-
N1,N8-diacetylspermidine@4.29-pa	N1,N8-diacetylspermidine	FALSE	FALSE	4.29	1	N1-N8-diacetylspermidine	Amino acids	C11H23N3O2	229.179	HMDB41947	-	389613	-	N1,N8-diacetylspermidine	389613	pa	10	5.624	9	9	-	-	-	N1,N8-diacetylspermidine@4.30-pa	N1,N8-diacetylspermidine@4.30-pa	N1,N8-diacetylspermidine@4.29-pa	-	-	-	-	-	-
N8-acetylspermidine@5.40-pa	N8-acetylspermidine	FALSE	FALSE	5.396	1	N8-acetylspermidine	Amino acids	C9H21N3O	187.168	HMDB02189	C01029	123689	chebiId:27911	N-acetylspermidine	123689	pa	10	11.035	9	9	-	-	-	N8-acetylspermidine@5.41-pa	N8-acetylspermidine@5.40-pa	N8-acetylspermidine@5.40-pa	-	-	-	-	-	-
Niacinamide@11.74-gc	Niacinamide	FALSE	FALSE	11.744	1	Niacinamide	Unclassified	C6H6N2O	122.048	HMDB01406	C00153	936	chebiId:17154	Niacinamide	936	gc	1022	9.609	9	9	-	-	-	-	-	-	-	-	-	Niacinamide@11.74-gc	Niacinamide@11.74-gc	Niacinamide@11.74-gc
Nicotinic acid@9.36-gc	Nicotinic acid	FALSE	FALSE	9.36	1	Nicotinic_acid	Unclassified	C6H5NO2	123.032	HMDB01488	C00253	938;117629482	chebiId:15940	Nicotinic acid	117629482	gc	5211	7.524	9	9	-	-	-	-	-	-	-	-	-	Nicotinic acid@9.36-gc	Nicotinic acid@9.36-gc	Nicotinic acid@9.36-gc
Nonanoic acid@10.21-gc	Nonanoic acid	FALSE	FALSE	10.209	1	Nonanoic_acid	Fatty Acyls	C9H18O2	158.131	HMDB00847	C01601	8158	chebiId:29019	Nonanoic acid	8158	gc	740038	12.395	0	9	-	-	-	-	-	-	-	-	-	Nonanoic acid@10.21-gc	Nonanoic acid@10.21-gc	Nonanoic acid@10.21-gc
O-phosphoethanolamine@15.40-gc	O-phosphoethanolamine	FALSE	FALSE	15.404	1	O-phosphoethanolamine	Organic acids	C2H8NO4P	141.019	HMDB00224	C00346	1015;5232324	chebiId:17553	O-phosphoethanolamine	1015	gc	299	10.57	9	9	-	-	-	-	-	-	-	-	-	O-phosphoethanolamine@15.40-gc	O-phosphoethanolamine@15.40-gc	O-phosphoethanolamine@15.40-gc
Oleic acid;Elaidic acid@21.35-gc	Oleic acid;Elaidic acid	FALSE	FALSE	21.354	1	Oleic_acid__Elaidic_acid	Fatty Acyls	C18H34O2	282.256	HMDB00573;HMDB00207	C01712;C00712	637517;445639	chebiId:27997;chebiId:16196	Oleic acid;Elaidic acid	637517;445639	gc	38013	12.864	9	9	-	-	-	-	-	-	-	-	-	Oleic acid;Elaidic acid@21.36-gc	Oleic acid;Elaidic acid@21.35-gc	Oleic acid;Elaidic acid@21.34-gc
Omega-muricholic acid@5.86-ba	Omega-muricholic acid	FALSE	FALSE	5.863	1	Omega-muricholic acid	Steroids	C24H40O5	408.288	HMDB00364	C17727	5283851	chebiId:81299	omega-muricholic acid	5283851	ba	42	3.678	11	11	-	-	-	-	-	-	Omega-muricholic acid@5.86-ba	Omega-muricholic acid@5.76-ba	Omega-muricholic acid@5.97-ba	-	-	-
Ornithine@2.13-pa	Ornithine	FALSE	FALSE	2.133	1	Ornithine	Amino acids	C5H12N2O2	132.09	HMDB03374;HMDB00214	C00077;C00515	6262;389;71082	chebiId:15729;chebiId:16176	Ornithine	389	pa	10	17.161	9	9	-	-	-	Ornithine@2.13-pa	Ornithine@2.13-pa	Ornithine@2.13-pa	-	-	-	-	-	-
Palmitic acid@18.30-gc	Palmitic acid	FALSE	FALSE	18.3	1	Palmitic_acid	Fatty Acyls	C16H32O2	256.24	HMDB00220	C00249	985	chebiId:15756	Palmitic acid	985	gc	5064454	5.838	0	9	-	-	-	-	-	-	-	-	-	Palmitic acid@18.30-gc	Palmitic acid@18.30-gc	Palmitic acid@18.29-gc
Palmitoleic acid@18.00-gc	Palmitoleic acid	FALSE	FALSE	18.001	1	Palmitoleic_acid	Fatty Acyls	C16H30O2	254.225	HMDB03229	C08362	445638;4668	chebiId:28716	Palmitoleic acid	445638	gc	8836	11.582	9	9	-	-	-	-	-	-	-	-	-	Palmitoleic acid@18.00-gc	Palmitoleic acid@18.00-gc	Palmitoleic acid@18.00-gc
Pantothenic acid@17.81-gc	Pantothenic acid	FALSE	FALSE	17.813	1	Pantothenic_acid	Amino acids	C9H17NO5	219.111	HMDB00210	C00864	6613;988	chebiId:29032;chebiId:46905;chebiId:7916	Pantothenic acid	988	gc	100	10.136	9	9	-	-	-	-	-	-	-	-	-	Pantothenic acid@17.82-gc	Pantothenic acid@17.82-gc	Pantothenic acid@17.81-gc
Phenylalanine@13.60-gc	Phenylalanine	FALSE	FALSE	13.604	1	Phenylalanine	Amino acids	C9H11NO2	165.079	HMDB00159	C00079	6140;994;57397115	chebiId:17295	Phenylalanine	57397115	gc	3896	7.946	9	9	-	-	-	-	-	-	-	-	-	Phenylalanine@13.61-gc	Phenylalanine@13.60-gc	Phenylalanine@13.60-gc
Phenylbutyric acid@12.41-gc	Phenylbutyric acid	FALSE	FALSE	12.41	1	Phenylbutyric_acid	Unclassified	C10H12O2	164.084	HMDB00329;HMDB01955;HMDB00543	-	4775	-	Phenylbutyric acid	4775	gc	1905	17.777	9	9	-	-	-	-	-	-	-	-	-	Phenylbutyric acid@12.41-gc	Phenylbutyric acid@12.41-gc	Phenylbutyric acid@12.41-gc
Phosphoric acid@9.20-gc	Phosphoric acid	FALSE	FALSE	9.196	1	Phosphoric_acid	Unclassified	H3O4P	97.977	HMDB01429;HMDB02142	C00009	1004	chebiId:18367;chebiId:26078	Phosphoric acid	1004	gc	67576	9.932	9	9	-	-	-	-	-	-	-	-	-	Phosphoric acid@9.20-gc	Phosphoric acid@9.20-gc	Phosphoric acid@9.20-gc
Proline@9.47-gc	Proline	FALSE	FALSE	9.473	1	Proline	Amino acids	C5H9NO2	115.063	HMDB03411;HMDB00162	C00763;C00148	8988;145742;25246272;614	chebiId:16313;chebiId:17203	Proline	25246272	gc	6117	19.152	9	9	-	-	-	-	-	-	-	-	-	Proline@9.47-gc	Proline@9.48-gc	Proline@9.47-gc
Propionic acid@2.86-sf	Propionic acid	FALSE	FALSE	2.857	1	Propionic_acid	Organic acids	C3H6O2	74.037	HMDB00237	C00163	1032	chebiId:30768	Propionic acid	1032	sf	100	1.14	8	8	Propionic acid@2.87-sf	Propionic acid@2.84-sf	Propionic acid@2.85-sf	-	-	-	-	-	-	-	-	-
Putrescine@4.81-pa	Putrescine	FALSE	FALSE	4.809	1	Putrescine	Unclassified	C4H12N2	88.1	HMDB01414	C00134	1045	chebiId:17148	Putrescine	1045	pa	10	10.204	9	9	-	-	-	Putrescine@4.82-pa	Putrescine@4.84-pa	Putrescine@4.81-pa	-	-	-	-	-	-
Pyruvic acid;Oxaloacetic acid@6.26-gc	Pyruvic acid;Oxaloacetic acid	FALSE	FALSE	6.259	1	Pyruvic acid__Oxaloacetic acid	Organic acids	C4H4O5;C3H4O3	110.011	HMDB00223;HMDB00243	C00036;C00022	970;1060	chebiId:30744;chebiId:32816	Oxaloacetic acid;Pyruvic acid	970;1060	gc	1881	9.312	9	9	-	-	-	-	-	-	-	-	-	Pyruvic acid;Oxaloacetic acid@6.24-gc	Pyruvic acid;Oxaloacetic acid@6.26-gc	Pyruvic acid;Oxaloacetic acid@6.27-gc
Raffinose@31.23-gc	Raffinose	FALSE	FALSE	31.232	1	Raffinose	Carbohydrates	C18H32O16	504.169	HMDB03213	C00492	10542;219993;439242	chebiId:16634	Raffinose	219993	gc	100	6.237	9	9	-	-	-	-	-	-	-	-	-	Raffinose@31.24-gc	Raffinose@31.23-gc	Raffinose@31.22-gc
Ribitol@14.88-gc	Ribitol	FALSE	FALSE	14.875	1	Ribitol	Carbohydrates	C5H12O5	152.068	HMDB00508	C00474	827	chebiId:15963	Ribitol	827	gc	259	11.304	9	9	-	-	-	-	-	-	-	-	-	Ribitol@14.88-gc	Ribitol@14.88-gc	Ribitol@14.87-gc
Ribose-5-phosphate@20.10-gc	Ribose-5-phosphate	FALSE	FALSE	20.1	1	Ribose-5-phosphate	Carbohydrates	C5H11O8P	230.019	HMDB01548	C00117	439167	chebiId:17797;chebiId:52742	Ribose-5-phosphate	439167	gc	100	13.539	9	9	-	-	-	-	-	-	-	-	-	Ribose-5-phosphate@20.11-gc	Ribose-5-phosphate@20.10-gc	Ribose-5-phosphate@20.09-gc
Ribose;Ribulose@14.34-gc	Ribose;Ribulose	FALSE	FALSE	14.343	1	Ribose__Ribulose	Carbohydrates	C5H10O5	150.053	HMDB00283;HMDB00621;HMDB03371	C00121;C00309;C00508	5779;993;79021;439204;439203	chebiId:47013;chebiId:17173;chebiId:16880	Ribose;Ribulose	993;79021	gc	100	7.502	9	9	-	-	-	-	-	-	-	-	-	Ribose;Ribulose@14.35-gc	Ribose;Ribulose@14.34-gc	Ribose;Ribulose@14.34-gc
Ribulose-5-phosphate@20.32-gc	Ribulose-5-phosphate	FALSE	FALSE	20.32	1	Ribulose-5-phosphate	Carbohydrates	C5H11O8P	230.019	HMDB00618	C00199;C01101	439184;439399	chebiId:17363;chebiId:17666	Ribulose-5-phosphate	439184	gc	100	14.141	9	9	-	-	-	-	-	-	-	-	-	Ribulose-5-phosphate@20.33-gc	Ribulose-5-phosphate@20.32-gc	Ribulose-5-phosphate@20.31-gc
Sarcosine@10.53-gc	Sarcosine	FALSE	FALSE	10.531	1	Sarcosine	Amino acids	C3H7NO2	89.048	HMDB00271	C00213	1088;7311726	chebiId:15611	Sarcosine	1088	gc	220	12.859	9	9	-	-	-	-	-	-	-	-	-	Sarcosine@10.53-gc	Sarcosine@10.53-gc	Sarcosine@10.53-gc
Sebacic acid@16.96-gc	Sebacic acid	FALSE	FALSE	16.96	1	Sebacic_acid	Fatty Acyls	C10H18O4	202.121	HMDB00792	C08277	5192	chebiId:41865	Sebacic acid	5192	gc	2854	13.066	7	9	-	-	-	-	-	-	-	-	-	Sebacic acid@16.96-gc	Sebacic acid@16.96-gc	Sebacic acid@16.96-gc
Serine@10.34-gc	Serine	FALSE	FALSE	10.342	1	Serine	Amino acids	C3H7NO3	105.043	HMDB00187;HMDB03406	C00065;C00740	5951;617;6857552;71077	chebiId:17115	Serine	617	gc	8522	4.207	9	9	-	-	-	-	-	-	-	-	-	Serine@10.34-gc	Serine@10.34-gc	Serine@10.34-gc
Shikimic acid@15.23-gc	Shikimic acid	FALSE	FALSE	15.23	1	Shikimic_acid	Unclassified	C7H10O5	174.053	HMDB03070	C00493	8742;1094	chebiId:16119	Shikimic acid	1094	gc	198	12.201	9	9	-	-	-	-	-	-	-	-	-	Shikimic acid@15.23-gc	Shikimic acid@15.23-gc	Shikimic acid@15.22-gc
Spermidine@6.51-pa	Spermidine	FALSE	FALSE	6.514	1	Spermidine	Unclassified	C7H19N3	145.158	HMDB01257	C00315	1102	chebiId:16610	Spermidine	1102	pa	10	8.404	9	9	-	-	-	Spermidine@6.50-pa	Spermidine@6.51-pa	Spermidine@6.53-pa	-	-	-	-	-	-
Stearic acid@21.69-gc	Stearic acid	FALSE	FALSE	21.688	1	Stearic_acid	Fatty Acyls	C18H36O2	284.272	HMDB00827	C01530	5281	chebiId:25629;chebiId:28842	Stearic acid	5281	gc	403716	5.317	0	9	-	-	-	-	-	-	-	-	-	Stearic acid@21.69-gc	Stearic acid@21.69-gc	Stearic acid@21.68-gc
Succinic acid@9.65-gc	Succinic acid	FALSE	FALSE	9.65	1	Succinic_acid	Organic acids	C4H6O4	118.027	HMDB00254	C00042	1110;21952380	chebiId:15741	Succinic acid	1110	gc	48701	5.545	9	9	-	-	-	-	-	-	-	-	-	Succinic acid@9.65-gc	Succinic acid@9.65-gc	Succinic acid@9.65-gc
Sucrose@26.90-gc	Sucrose	FALSE	FALSE	26.897	1	Sucrose	Carbohydrates	C12H22O11	342.116	HMDB00258	C00089	5988;1115	chebiId:17992	Sucrose	1115	gc	6582	4.279	9	9	-	-	-	-	-	-	-	-	-	Sucrose@26.90-gc	Sucrose@26.90-gc	Sucrose@26.89-gc
Taurine@14.11-gc	Taurine	FALSE	FALSE	14.112	1	Taurine	Organic acids	C2H7NO3S	125.015	HMDB00251	C00245	1123;4068592	chebiId:15891	Taurine	1123	gc	100	32.822	9	9	-	-	-	-	-	-	-	-	-	Taurine@14.11-gc	Taurine@14.11-gc	Taurine@14.11-gc
Tauro-alpha-muricholic acid;Tauro-beta-muricholic acid;Tauro-omega-muricholic acid@2.34-ba	Tauro-alpha-muricholic acid;Tauro-beta-muricholic acid;Tauro-omega-muricholic acid	FALSE	FALSE	2.338	1	Tauromuricholic acid	Steroids	C26H45NO7S	515.292	HMDB00932	-	101657566;168408	chebiId:133057	TAURO Î±-MURICHOLIC ACID SODIUM SALT;Tauro-beta-muricholic acid	101657566;168408	ba	40	2.176	11	11	-	-	-	-	-	-	Tauro-alpha-muricholic acid;Tauro-beta-muricholic acid;Tauro-omega-muricholic acid@2.34-ba	Tauro-alpha-muricholic acid;Tauro-beta-muricholic acid;Tauro-omega-muricholic acid@2.30-ba	Tauro-alpha-muricholic acid;Tauro-beta-muricholic acid;Tauro-omega-muricholic acid@2.40-ba	-	-	-
Taurochenodeoxycholic acid@7.06-ba	Taurochenodeoxycholic acid	FALSE	FALSE	7.064	1	Taurochenodeoxycholic acid	Steroids	C26H45NO6S	499.297	HMDB00951	C05465	387316	chebiId:16525;chebiId:9407	Taurochenodeoxycholic acid	387316	ba	20	24.294	11	11	-	-	-	-	-	-	Taurochenodeoxycholic acid@7.06-ba	Taurochenodeoxycholic acid@6.92-ba	Taurochenodeoxycholic acid@7.27-ba	-	-	-
Taurocholic acid@4.51-ba	Taurocholic acid	FALSE	FALSE	4.512	1	Taurocholic acid	Steroids	C26H45NO7S	515.292	HMDB00036	C05122	440567;5247;46783527	chebiId:28865	Taurocholic acid	5247	ba	25	15.108	11	11	-	-	-	-	-	-	Taurocholic acid@4.51-ba	Taurocholic acid@4.46-ba	Taurocholic acid@4.60-ba	-	-	-
Taurodeoxycholic acid@8.22-ba	Taurodeoxycholic acid	FALSE	FALSE	8.218	1	Taurodeoxycholic acid	Steroids	C26H45NO6S	499.297	HMDB00896	C05463	2733768;440687;92042745	chebiId:36261;chebiId:9410	Taurodeoxycholic acid	2733768	ba	31	4.764	11	11	-	-	-	-	-	-	Taurodeoxycholic acid@8.21-ba	Taurodeoxycholic acid@8.04-ba	Taurodeoxycholic acid@8.48-ba	-	-	-
Taurohyodeoxycholic acid@4.22-ba	Taurohyodeoxycholic acid	FALSE	FALSE	4.217	1	Taurohyodeoxycholic acid	Steroids	C26H45NO6S	499.297	-	-	119046	-	Taurohyodeoxycholic acid	119046	ba	12	25.177	11	11	-	-	-	-	-	-	Taurohyodeoxycholic acid@4.22-ba	Taurohyodeoxycholic acid@4.17-ba	Taurohyodeoxycholic acid@4.30-ba	-	-	-
Taurolithocholic acid@9.75-ba	Taurolithocholic acid	FALSE	FALSE	9.752	1	Taurolithocholic acid	Steroids	C26H45NO5S	483.302	HMDB00722	C02592	439763;53477716	chebiId:36259	Taurolithocholic acid	439763	ba	33	77.384	9	11	-	-	-	-	-	-	Taurolithocholic acid@9.75-ba	Taurolithocholic acid@9.72-ba	Taurolithocholic acid@9.84-ba	-	-	-
Tauroursodeoxycholic acid@4.03-ba	Tauroursodeoxycholic acid	FALSE	FALSE	4.029	1	Tauroursodeoxycholic acid	Steroids	C26H45NO6S	499.297	HMDB00874	-	12443252	-	Tauroursodeoxycholic acid	12443252	ba	10	14.56	11	11	-	-	-	-	-	-	Tauroursodeoxycholic acid@4.02-ba	Tauroursodeoxycholic acid@3.98-ba	Tauroursodeoxycholic acid@4.09-ba	-	-	-
Threonic acid@12.74-gc	Threonic acid	FALSE	FALSE	12.74	1	Threonic_acid	Carbohydrates	C4H8O5	136.037	HMDB00943	C01620	151152;439535;5460407	chebiId:15908;chebiId:49060	Threonic acid	439535	gc	100	6.513	9	9	-	-	-	-	-	-	-	-	-	Threonic acid@12.74-gc	Threonic acid@12.74-gc	Threonic acid@12.74-gc
Threonine@10.70-gc	Threonine	FALSE	FALSE	10.702	1	Threonine	Amino acids	C4H9NO3	119.058	HMDB00167	C00188	6288;205;15341575	chebiId:16857	Threonine	15341575	gc	38035	6.621	9	9	-	-	-	-	-	-	-	-	-	Threonine@10.70-gc	Threonine@10.70-gc	Threonine@10.70-gc
Thymine@10.85-gc	Thymine	FALSE	FALSE	10.849	1	Thymine	Bases	C5H6N2O2	126.043	HMDB00262	C00178	1135	chebiId:17821	Thymine	1135	gc	191	10.188	9	9	-	-	-	-	-	-	-	-	-	Thymine@10.85-gc	Thymine@10.85-gc	Thymine@10.85-gc
Tryptophan@21.58-gc	Tryptophan	FALSE	FALSE	21.584	1	Tryptophan	Indoles	C11H12N2O2	204.09	HMDB00929;HMDB30396	C00078;C00806	6305;1148;9060;4099458	chebiId:16828;chebiId:27897	Tryptophan	1148	gc	3548	11.197	9	9	-	-	-	-	-	-	-	-	-	Tryptophan@21.59-gc	Tryptophan@21.58-gc	Tryptophan@21.57-gc
Tyrosine@17.07-gc	Tyrosine	FALSE	FALSE	17.066	1	Tyrosine	Amino acids	C9H11NO3	181.074	HMDB00158	C00082	6057;1153;4300518	chebiId:17895	Tyrosine	1153	gc	1212	11.39	9	9	-	-	-	-	-	-	-	-	-	Tyrosine@17.07-gc	Tyrosine@17.06-gc	Tyrosine@17.06-gc
Uracil@10.02-gc	Uracil	FALSE	FALSE	10.021	1	Uracil	Bases	C4H4N2O2	112.027	HMDB00300	C00106	1174	chebiId:17568	Uracil	1174	gc	613	8.052	9	9	-	-	-	-	-	-	-	-	-	Uracil@10.02-gc	Uracil@10.02-gc	Uracil@10.02-gc
Urea@8.64-gc	Urea	FALSE	FALSE	8.637	1	Urea	Organic acids	CH4N2O	60.032	HMDB00294	C00086	1176	chebiId:16199	Urea	1176	gc	91085	7.653	9	9	-	-	-	-	-	-	-	-	-	Urea@8.63-gc	Urea@8.63-gc	Urea@8.66-gc
Uric acid@19.73-gc	Uric acid	FALSE	FALSE	19.734	1	Uric_acid	Bases	C5H4N4O3	168.028	HMDB00289	C00366	1175	chebiId:17775	Uric acid	1175	gc	100	9.373	9	9	-	-	-	-	-	-	-	-	-	Uric acid@19.73-gc	Uric acid@19.73-gc	Uric acid@19.72-gc
Ursodeoxycholic acid@8.89-ba	Ursodeoxycholic acid	FALSE	FALSE	8.888	1	Ursodeoxycholic acid	Steroids	C24H40O4	392.293	HMDB00946	C07880	31401	chebiId:9907	Ursodeoxycholic acid	31401	ba	10	2.637	11	11	-	-	-	-	-	-	Ursodeoxycholic acid@8.89-ba	Ursodeoxycholic acid@8.72-ba	Ursodeoxycholic acid@9.01-ba	-	-	-
Valine@8.40-gc	Valine	FALSE	FALSE	8.4	1	Valine	Amino acids	C5H11NO2	117.079	HMDB00883	C00183	6287;1182;5237032	chebiId:16414	Valine	1182	gc	54328	9.722	9	9	-	-	-	-	-	-	-	-	-	Valine@8.40-gc	Valine@8.40-gc	Valine@8.40-gc
Xanthine@18.22-gc	Xanthine	FALSE	FALSE	18.224	1	Xanthine	Bases	C5H4N4O2	152.033	HMDB00292	C00385	1188	chebiId:17712;chebiId:48517	Xanthine	1188	gc	119	7.612	9	9	-	-	-	-	-	-	-	-	-	Xanthine@18.23-gc	Xanthine@18.22-gc	Xanthine@18.21-gc
Xylitol@14.68-gc	Xylitol	FALSE	FALSE	14.682	1	Xylitol	Carbohydrates	C5H12O5	152.068	HMDB02917	C00379	6912	chebiId:17151	Xylitol	6912	gc	100	20.667	9	9	-	-	-	-	-	-	-	-	-	Xylitol@14.69-gc	Xylitol@14.69-gc	Xylitol@14.68-gc
Xylose@14.11-gc	Xylose	FALSE	FALSE	14.11	1	Xylose	Carbohydrates	C5H10O5	150.053	HMDB00098	C00181	135191;6027	chebiId:15936;chebiId:53455	Xylose	135191	gc	100	7.598	9	9	-	-	-	-	-	-	-	-	-	Xylose@14.11-gc	Xylose@14.11-gc	Xylose@14.11-gc

## Sheet: Area
Sid	12-dehydrocholic acid@5.38-ba	2-hydroxybutyric acid@7.23-gc	2-hydroxyglutaric acid@13.01-gc	2-oxoglutaric acid@13.01-gc	3-hydroxybutyric acid@7.41-gc	3-hydroxyisovaleric acid@7.82-gc	3-methylhistidine@16.86-gc	4-hydroxymandelic acid@15.23-gc	4-hydroxyproline@12.44-gc	5-aminovaleric acid@13.53-gc	5-oxoproline@12.35-gc	7,12-dihydroxy-3-oxocholanoic acid@7.11-ba	Acetic acid@1.78-sf	Adenine@16.19-gc	Alanine@6.92-gc	Allantoin@16.54-gc	Alpha-muricholic acid@6.00-ba	Alpha-tocopherol@29.51-gc	Anthranilic acid@13.43-gc	Arabinose@14.17-gc	Arabitol@14.82-gc	Arachidonic acid@23.75-gc	Asparagine@14.13-gc	Aspartic acid@12.37-gc	Behenic acid@26.41-gc	Benzoic acid@8.76-gc	Beta-alanine@11.16-gc	Beta-hydroxypyruvic acid@5.45-gc	Beta-muricholic acid@6.27-ba	Butanoic acid@5.24-sf	Cadaverine@4.45-pa	Capric acid@11.44-gc	Caprylic acid@8.95-gc	Chenodeoxycholic acid@10.32-ba	Cholesterol@29.51-gc	Cholic acid@9.13-ba	Citric acid;Isocitric acid@15.81-gc	Citrulline@15.78-gc	Creatine@12.80-gc	Cytosine@12.37-gc	Deoxycholic acid@10.54-ba	Dimethylglycine@5.45-gc	Erythritol@12.29-gc	Ferulic acid@19.20-gc	Fructose@16.48-gc	Fumaric acid@10.06-gc	GABA@12.44-gc	Galactitol;Sorbitol;Mannitol@17.29-gc	Galactose;Glucose;Mannose@17.01-gc
BlM-exp2-colon_pre	NA	NA	NA	NA	NA	NA	NA	NA	NA	NA	NA	NA	3501	NA	NA	NA	NA	NA	NA	NA	NA	NA	NA	NA	NA	NA	NA	NA	NA	522	NA	NA	NA	NA	NA	NA	NA	NA	NA	NA	NA	NA	NA	NA	NA	NA	NA	NA	NA
BlM_exp1-colon_pre	24	91474	2262	41	1402820	2079	88	13	1834	68	141744	10	NA	317	478892	14	34	9	209	489	20	4985	722	3425	7154	930206	1925	1931607	69	NA	39	350972	732858	538	1677	502	78026	444	259	193	510	3624715	409	12	2119	35132	870	160	1570
BlM-exp2-colon_post	NA	NA	NA	NA	NA	NA	NA	NA	NA	NA	NA	NA	3015	NA	NA	NA	NA	NA	NA	NA	NA	NA	NA	NA	NA	NA	NA	NA	NA	1095	NA	NA	NA	NA	NA	NA	NA	NA	NA	NA	NA	NA	NA	NA	NA	NA	NA	NA	NA
BlM-exp1-colon_pre	NA	NA	NA	NA	NA	NA	NA	NA	NA	NA	NA	NA	4308	NA	NA	NA	NA	NA	NA	NA	NA	NA	NA	NA	NA	NA	NA	NA	NA	967	NA	NA	NA	NA	NA	NA	NA	NA	NA	NA	NA	NA	NA	NA	NA	NA	NA	NA	NA
BlM_exp3-colon_pre	34	139842	1112	65	930101	3543	145	10	1372	155	135731	32	NA	1400	194977	20	39	24	260	709	121	2563	1543	2424	15072	1148450	2654	1994699	71	NA	151	572512	1073433	110	371	248	108716	138	506	619	210	3772758	159	212	1135	26543	1702	1150	197
BlM_exp1-colon_post	36	194366	15933	222	2587792	3751	275	1617	119532	673	1002493	33	NA	40979	647456	25	90	14	2221	1602	2395	22777	1294	28310	30389	1162298	7135	3158433	480	NA	577	578978	1149706	29	2869	265	20178	1215	7526	30380	632	5531775	3545	94495	8548	441140	9566	2599	2148
BlM_exp2-colon_pre	18	195895	8018	26	1190345	4184	260	8	1668	582	187526	12	NA	380	89102	163	24	17	279	9231	478	1480	1333	2146	7965	808505	2133	2773316	238	NA	119	430757	982940	271	589	295	39462	307	453	260	527	5104453	944	523	7241	27593	2093	3341	369
BlM-exp1-colon_post	NA	NA	NA	NA	NA	NA	NA	NA	NA	NA	NA	NA	3675	NA	NA	NA	NA	NA	NA	NA	NA	NA	NA	NA	NA	NA	NA	NA	NA	982	NA	NA	NA	NA	NA	NA	NA	NA	NA	NA	NA	NA	NA	NA	NA	NA	NA	NA	NA
BlM-exp3-colon_pre	NA	NA	NA	NA	NA	NA	NA	NA	NA	NA	NA	NA	5489	NA	NA	NA	NA	NA	NA	NA	NA	NA	NA	NA	NA	NA	NA	NA	NA	1307	NA	NA	NA	NA	NA	NA	NA	NA	NA	NA	NA	NA	NA	NA	NA	NA	NA	NA	NA
BlM_exp3-colon_post	19	75965	3891	234	2110013	5081	156	1253	53747	240	515122	7	NA	11992	426983	125	67	88	797	1011	1878	7355	1536	7454	11245	1213970	4808	2568147	64	NA	325	643119	1279624	96	1650	308	6206	602	3405	7012	457	4913148	3308	30399	2507	200373	4673	2530	312
BlM_exp2-colon_post	16	77517	2569	77	2452784	6149	203	550	37512	617	303703	NA	NA	10115	465591	260	134	20	1593	15557	2275	4004	1324	6234	10738	986576	5121	3459331	415	NA	389	550525	1315434	64	1031	622	16664	877	2122	2485	939	6759465	3047	22488	12147	115830	6323	9055	351
BlM-exp3-colon_post	NA	NA	NA	NA	NA	NA	NA	NA	NA	NA	NA	NA	4381	NA	NA	NA	NA	NA	NA	NA	NA	NA	NA	NA	NA	NA	NA	NA	NA	1172	NA	NA	NA	NA	NA	NA	NA	NA	NA	NA	NA	NA	NA	NA	NA	NA	NA	NA	NA
QC_batch-exp2-colon_5d	NA	NA	NA	NA	NA	NA	NA	NA	NA	NA	NA	NA	106755	NA	NA	NA	NA	NA	NA	NA	NA	NA	NA	NA	NA	NA	NA	NA	NA	416057	NA	NA	NA	NA	NA	NA	NA	NA	NA	NA	NA	NA	NA	NA	NA	NA	NA	NA	NA
QC_exp123-colon_pre.bacolon3	67326	NA	NA	NA	NA	NA	NA	NA	NA	NA	NA	1371	NA	NA	NA	NA	477358	NA	NA	NA	NA	NA	NA	NA	NA	NA	NA	NA	2030754	NA	NA	NA	NA	28578	NA	712117	NA	NA	NA	NA	813793	NA	NA	NA	NA	NA	NA	NA	NA
QC_batch-exp2-colon_5e	NA	NA	NA	NA	NA	NA	NA	NA	NA	NA	NA	NA	107527	NA	NA	NA	NA	NA	NA	NA	NA	NA	NA	NA	NA	NA	NA	NA	NA	441971	NA	NA	NA	NA	NA	NA	NA	NA	NA	NA	NA	NA	NA	NA	NA	NA	NA	NA	NA
QC_batch-exp2-colon_5f	NA	NA	NA	NA	NA	NA	NA	NA	NA	NA	NA	NA	111052	NA	NA	NA	NA	NA	NA	NA	NA	NA	NA	NA	NA	NA	NA	NA	NA	460963	NA	NA	NA	NA	NA	NA	NA	NA	NA	NA	NA	NA	NA	NA	NA	NA	NA	NA	NA
QC_exp1-colon_5a	96199	950905	617761	45426	3644819	9804	1563	21300	2510592	122735	7316494	2275	NA	162989	22924001	308418	738689	965	2940	2430760	544551	906202	251008	1614350	84274	965431	889070	736119	2844866	NA	32791	467793	971108	40683	726647	758038	119812	263012	6578544	44751	1534063	1352493	278805	492865	6382584	429550	705918	4248673	606969
QC_batch-exp2-colon_5g	NA	NA	NA	NA	NA	NA	NA	NA	NA	NA	NA	NA	114568	NA	NA	NA	NA	NA	NA	NA	NA	NA	NA	NA	NA	NA	NA	NA	NA	501196	NA	NA	NA	NA	NA	NA	NA	NA	NA	NA	NA	NA	NA	NA	NA	NA	NA	NA	NA
QC_exp1-colon_5b	97010	995510	658081	47475	4079779	10311	2298	23447	2741395	147082	8124250	1337	NA	185793	23477775	355087	680350	948	2843	2530538	568389	1014227	256673	1751776	93289	1154338	943659	841515	2841459	NA	42083	498864	1038463	28253	792618	736764	135673	316590	6967422	56151	1483670	1632462	299416	531220	6723843	616775	763457	4503158	644777
QC_batch-exp2-colon_5h	NA	NA	NA	NA	NA	NA	NA	NA	NA	NA	NA	NA	115970	NA	NA	NA	NA	NA	NA	NA	NA	NA	NA	NA	NA	NA	NA	NA	NA	524105	NA	NA	NA	NA	NA	NA	NA	NA	NA	NA	NA	NA	NA	NA	NA	NA	NA	NA	NA
QC_exp1-colon_6a	NA	1009757	618705	19258	3325883	9721	1816	23726	2262651	206095	8601107	NA	NA	200049	20789788	163281	NA	990	4547	2250638	504424	857626	202594	1496096	91294	1559633	878980	1354643	NA	NA	NA	610651	1159397	NA	747506	NA	50176	252915	5994893	71856	NA	2546321	278614	575494	6113290	799529	702363	3874015	549763
QC_exp1-colon_5c	99064	960253	654005	43101	3859039	10403	1640	21232	2600044	159608	7730807	1841	NA	187871	22495211	267160	710392	1112	3270	2478493	455490	869205	200011	1594432	83588	1017501	931502	893525	2882680	NA	32720	494711	1037010	32005	778318	738868	125042	267263	6001038	56063	1510308	1668243	300160	559489	6507781	653617	739896	4270046	625307
QC_batch-exp2-colon_5i	NA	NA	NA	NA	NA	NA	NA	NA	NA	NA	NA	NA	114450	NA	NA	NA	NA	NA	NA	NA	NA	NA	NA	NA	NA	NA	NA	NA	NA	530305	NA	NA	NA	NA	NA	NA	NA	NA	NA	NA	NA	NA	NA	NA	NA	NA	NA	NA	NA
QC_exp1-colon_6b	NA	1121676	649356	31854	3807227	10290	1153	21076	2404586	173338	9350668	NA	NA	212453	21669465	211614	NA	788	4752	2377930	536512	851335	138917	1497242	99905	1565387	912419	1443879	NA	NA	NA	656189	1214638	NA	805003	NA	85835	225311	6442565	82414	NA	2709399	295036	581148	6330614	1029907	734293	4052855	580166
QC_exp1-colon_5d	102523	1081647	718232	47525	4015693	11598	1092	24700	2806320	174111	8868871	1962	NA	236981	25578594	298453	726840	799	4703	2686168	596601	1020998	214159	1744450	104585	1167511	1016900	1001259	2849528	NA	37069	557673	1161791	23871	862005	728060	143247	327066	6738198	77983	1499945	1862156	322431	572503	7199237	627156	792273	4694568	687282
QC_batch-exp2-colon_5j	NA	NA	NA	NA	NA	NA	NA	NA	NA	NA	NA	NA	110160	NA	NA	NA	NA	NA	NA	NA	NA	NA	NA	NA	NA	NA	NA	NA	NA	556315	NA	NA	NA	NA	NA	NA	NA	NA	NA	NA	NA	NA	NA	NA	NA	NA	NA	NA	NA
QC_exp1-colon_6c	NA	1029739	664804	35254	3746584	10137	1175	24132	2350407	171866	9281404	NA	NA	210821	20887087	190244	NA	1265	5895	2404684	551269	1225780	113531	1423901	113191	1658263	931763	1492236	NA	NA	NA	656042	1245809	NA	839594	NA	92121	234653	6180792	88051	NA	2740600	294269	626546	6568684	963583	747704	4194472	591843
QC_exp123-colon_post.bacolon3	79059	NA	NA	NA	NA	NA	NA	NA	NA	NA	NA	1774	NA	NA	NA	NA	524647	NA	NA	NA	NA	NA	NA	NA	NA	NA	NA	NA	2239285	NA	NA	NA	NA	18535	NA	801455	NA	NA	NA	NA	858991	NA	NA	NA	NA	NA	NA	NA	NA
QC-exp1-colon_5a	NA	NA	NA	NA	NA	NA	NA	NA	NA	NA	NA	NA	171444	NA	NA	NA	NA	NA	NA	NA	NA	NA	NA	NA	NA	NA	NA	NA	NA	876001	NA	NA	NA	NA	NA	NA	NA	NA	NA	NA	NA	NA	NA	NA	NA	NA	NA	NA	NA
QC_exp123-colon_pre.bacolon1	81517	NA	NA	NA	NA	NA	NA	NA	NA	NA	NA	1152	NA	NA	NA	NA	547658	NA	NA	NA	NA	NA	NA	NA	NA	NA	NA	NA	2265165	NA	NA	NA	NA	33211	NA	850454	NA	NA	NA	NA	994142	NA	NA	NA	NA	NA	NA	NA	NA
QC-exp1-colon_5b	NA	NA	NA	NA	NA	NA	NA	NA	NA	NA	NA	NA	169269	NA	NA	NA	NA	NA	NA	NA	NA	NA	NA	NA	NA	NA	NA	NA	NA	889601	NA	NA	NA	NA	NA	NA	NA	NA	NA	NA	NA	NA	NA	NA	NA	NA	NA	NA	NA
QC_exp1-colon_6d	NA	895682	641280	29914	3035064	10127	387	21791	2296737	196383	9134344	NA	NA	242552	18032619	192122	NA	1120	6609	2347775	524792	833616	94181	1432767	137304	1592035	872190	1366213	NA	NA	NA	643987	1168307	NA	828245	NA	81476	289954	5830430	101535	NA	2531019	285596	612328	6495168	802534	726279	4198169	596186
QC_exp123-exp1-colon_6b	NA	NA	NA	NA	NA	NA	NA	NA	NA	NA	NA	NA	NA	NA	NA	NA	NA	NA	NA	NA	NA	NA	NA	NA	NA	NA	NA	NA	NA	NA	20645	NA	NA	NA	NA	NA	NA	NA	NA	NA	NA	NA	NA	NA	NA	NA	NA	NA	NA
QC_exp1-colon_5e	100617	1130328	791195	40945	3653010	13122	1285	26161	2767902	228565	11089349	1289	NA	277537	25096806	258898	690457	1074	7581	2880304	545400	1166797	141535	1770767	151941	1515036	1082529	1175022	2859894	NA	26825	627711	1287247	24752	977147	752453	144774	384440	6514331	106682	1496481	2009697	350093	746919	7939263	945593	881346	5224605	766932
QC-exp1-colon_5c	NA	NA	NA	NA	NA	NA	NA	NA	NA	NA	NA	NA	170599	NA	NA	NA	NA	NA	NA	NA	NA	NA	NA	NA	NA	NA	NA	NA	NA	924927	NA	NA	NA	NA	NA	NA	NA	NA	NA	NA	NA	NA	NA	NA	NA	NA	NA	NA	NA
QC_exp1-colon_5f	102336	NA	NA	NA	NA	NA	NA	NA	NA	NA	NA	2274	NA	NA	NA	NA	735458	NA	NA	NA	NA	NA	NA	NA	NA	NA	NA	NA	2909066	NA	15512	NA	NA	22976	NA	751801	NA	NA	NA	NA	1463585	NA	NA	NA	NA	NA	NA	NA	NA
QC-exp1-colon_5d	NA	NA	NA	NA	NA	NA	NA	NA	NA	NA	NA	NA	174676	NA	NA	NA	NA	NA	NA	NA	NA	NA	NA	NA	NA	NA	NA	NA	NA	938925	NA	NA	NA	NA	NA	NA	NA	NA	NA	NA	NA	NA	NA	NA	NA	NA	NA	NA	NA
QC_exp3-colon_5a	38976	522869	2113255	44628	2568575	9614	936	28529	2554457	140629	8729457	962	NA	281742	16260693	283744	343313	944	1152	3556332	1111137	1398127	158650	1056994	138090	1244089	692165	1879772	1558028	NA	16192	638164	1240513	50323	1045621	786835	261518	218719	6076841	69545	957026	3513621	485879	603902	9135060	611572	606473	11972186	1383922
QC_exp1-colon_5g	99531	NA	NA	NA	NA	NA	NA	NA	NA	NA	NA	2267	NA	NA	NA	NA	694049	NA	NA	NA	NA	NA	NA	NA	NA	NA	NA	NA	2906513	NA	16238	NA	NA	35676	NA	748935	NA	NA	NA	NA	1478946	NA	NA	NA	NA	NA	NA	NA	NA
QC_exp3-colon_5d	42383	NA	NA	NA	NA	NA	NA	NA	NA	NA	NA	1245	NA	NA	NA	NA	356537	NA	NA	NA	NA	NA	NA	NA	NA	NA	NA	NA	1653543	NA	17745	NA	NA	50911	NA	827739	NA	NA	NA	NA	992582	NA	NA	NA	NA	NA	NA	NA	NA
QC_exp2-colon_5a	115912	598183	389606	49988	3228962	9796	1157	17662	2183737	145772	5237114	2923	NA	161115	16665123	398418	603491	785	1950	10915846	756512	972472	120543	1069918	103232	819917	609395	2014226	2747234	NA	36293	435422	1026867	42015	777554	1271604	151973	210801	5572186	53108	1467450	3918758	265364	580048	7611246	320384	601023	4303586	730384
QC_exp3-colon_5b	40988	519573	2218276	47801	2822039	10674	351	29872	2973208	179511	9510304	1175	NA	302314	16145864	349998	340329	1381	1495	3921859	1136688	1470355	188451	1233826	121441	1245193	745379	2080769	1577366	NA	13572	658329	1289616	49108	1054939	800801	254137	284301	6280227	70427	958945	3802204	516113	615483	9529299	666688	654507	12054128	1446253
QC-exp1-colon_5e	NA	NA	NA	NA	NA	NA	NA	NA	NA	NA	NA	NA	174263	NA	NA	NA	NA	NA	NA	NA	NA	NA	NA	NA	NA	NA	NA	NA	NA	951684	NA	NA	NA	NA	NA	NA	NA	NA	NA	NA	NA	NA	NA	NA	NA	NA	NA	NA	NA
QC_exp2-colon_6a	NA	560520	431240	49096	2460247	9957	490	19067	2211117	169712	6268561	NA	NA	192439	15224007	272842	NA	976	2145	11013352	851021	1049274	88668	1042625	100789	871564	647655	3911518	NA	NA	NA	455383	1109119	NA	827738	NA	96587	163405	4521153	62061	NA	7577573	307080	625866	8202793	405065	618072	5042167	808660
QC_exp1-colon_5h	103840	NA	NA	NA	NA	NA	NA	NA	NA	NA	NA	2407	NA	NA	NA	NA	739738	NA	NA	NA	NA	NA	NA	NA	NA	NA	NA	NA	2945355	NA	15322	NA	NA	33044	NA	769232	NA	NA	NA	NA	1500707	NA	NA	NA	NA	NA	NA	NA	NA
QC_exp3-colon_5e	48202	NA	NA	NA	NA	NA	NA	NA	NA	NA	NA	1189	NA	NA	NA	NA	368768	NA	NA	NA	NA	NA	NA	NA	NA	NA	NA	NA	1697512	NA	13962	NA	NA	45497	NA	849793	NA	NA	NA	NA	988379	NA	NA	NA	NA	NA	NA	NA	NA
QC_exp2-colon_5b	121887	581230	407489	51547	3311324	9781	1060	18007	2323638	164770	5613971	2406	NA	177941	17819229	383680	596261	750	2266	11386043	788875	1058987	123724	1141577	101356	782981	651110	2109363	2753399	NA	36241	448205	1083089	39106	808582	1289526	155885	237472	5827992	52437	1467090	4090259	282914	609973	7887723	355113	634743	4477327	774699
QC_exp3-colon_5c	41575	529465	2284537	47811	3107685	11229	727	29476	3007300	186207	9979369	1071	NA	308908	16735397	345407	362608	1205	2168	3919252	1158415	1484174	167304	1238156	118109	1312872	777220	2321514	1624028	NA	15730	686773	1342782	28582	1057352	819150	258748	291817	6165189	73758	982088	4498754	540602	662940	9761695	706321	686573	12491018	1474498
QC_exp2-colon_6b	NA	553979	424872	49459	2703167	10196	866	17665	2356270	168998	6697574	NA	NA	182218	18049439	334073	NA	738	2747	11201325	867574	982674	93611	1141229	94347	897782	649562	4045001	NA	NA	NA	462313	1117857	NA	827157	NA	100105	190503	4622491	68431	NA	7889407	310721	624739	8336928	418084	661933	5128256	823245
QC-exp1-colon_5f	NA	NA	NA	NA	NA	NA	NA	NA	NA	NA	NA	NA	174810	NA	NA	NA	NA	NA	NA	NA	NA	NA	NA	NA	NA	NA	NA	NA	NA	948748	NA	NA	NA	NA	NA	NA	NA	NA	NA	NA	NA	NA	NA	NA	NA	NA	NA	NA	NA
QC_exp3-colon_5f	50340	NA	NA	NA	NA	NA	NA	NA	NA	NA	NA	1076	NA	NA	NA	NA	367445	NA	NA	NA	NA	NA	NA	NA	NA	NA	NA	NA	1699518	NA	16109	NA	NA	47841	NA	852243	NA	NA	NA	NA	997722	NA	NA	NA	NA	NA	NA	NA	NA
QC_exp2-colon_5c	115114	582490	423908	53305	3753747	11618	580	18541	2439733	177376	6032709	2367	NA	176267	22395754	392642	583658	1059	3729	11952275	833891	1156252	126573	1205030	106185	831570	682729	2127682	2712861	NA	19615	480984	1133570	43999	837816	1260554	164874	254577	5697967	55690	1415541	4236516	296735	630775	8362427	386512	667840	4680823	812611
QC-exp1-colon_5g	NA	NA	NA	NA	NA	NA	NA	NA	NA	NA	NA	NA	176204	NA	NA	NA	NA	NA	NA	NA	NA	NA	NA	NA	NA	NA	NA	NA	NA	953566	NA	NA	NA	NA	NA	NA	NA	NA	NA	NA	NA	NA	NA	NA	NA	NA	NA	NA	NA
QC_exp2-colon_6c	NA	564045	443424	51588	2462148	11502	358	19543	2287922	182210	7005021	NA	NA	189501	16060293	308675	NA	950	3121	11452986	895827	1015579	82311	1113221	96007	945002	683106	4186587	NA	NA	NA	472946	1171599	NA	846238	NA	102304	181947	4221690	68850	NA	8184050	322280	637261	8511168	458875	681367	5212927	827688
QC_exp3-colon_5g	45136	NA	NA	NA	NA	NA	NA	NA	NA	NA	NA	1404	NA	NA	NA	NA	389403	NA	NA	NA	NA	NA	NA	NA	NA	NA	NA	NA	1714427	NA	15040	NA	NA	58229	NA	866355	NA	NA	NA	NA	995682	NA	NA	NA	NA	NA	NA	NA	NA
QC-exp1-colon_5h	NA	NA	NA	NA	NA	NA	NA	NA	NA	NA	NA	NA	174169	NA	NA	NA	NA	NA	NA	NA	NA	NA	NA	NA	NA	NA	NA	NA	NA	962137	NA	NA	NA	NA	NA	NA	NA	NA	NA	NA	NA	NA	NA	NA	NA	NA	NA	NA	NA
QC_exp2-colon_6d	NA	574921	459464	52119	2819437	11549	428	18317	2348050	194971	7600036	NA	NA	203732	16037538	296660	NA	912	3580	11633928	922969	1061423	79329	1147464	109380	1000728	717335	4314661	NA	NA	NA	502474	1227163	NA	914196	NA	108083	186358	4089226	77466	NA	8272447	332842	670146	8867147	480164	708099	5474471	873281
QC-exp3-colon_5a	NA	NA	NA	NA	NA	NA	NA	NA	NA	NA	NA	NA	152530	NA	NA	NA	NA	NA	NA	NA	NA	NA	NA	NA	NA	NA	NA	NA	NA	714555	NA	NA	NA	NA	NA	NA	NA	NA	NA	NA	NA	NA	NA	NA	NA	NA	NA	NA	NA
QC_exp2-colon_5d	112877	NA	NA	NA	NA	NA	NA	NA	NA	NA	NA	1986	NA	NA	NA	NA	572456	NA	NA	NA	NA	NA	NA	NA	NA	NA	NA	NA	2658225	NA	26905	NA	NA	41325	NA	1239550	NA	NA	NA	NA	1401944	NA	NA	NA	NA	NA	NA	NA	NA
QC_exp123-colon_post.bacolon1	88267	NA	NA	NA	NA	NA	NA	NA	NA	NA	NA	1891	NA	NA	NA	NA	528750	NA	NA	NA	NA	NA	NA	NA	NA	NA	NA	NA	2403649	NA	NA	NA	NA	22640	NA	888893	NA	NA	NA	NA	1008123	NA	NA	NA	NA	NA	NA	NA	NA
QC_exp1-colon_5hb	107975	NA	NA	NA	NA	NA	NA	NA	NA	NA	NA	2924	NA	NA	NA	NA	725512	NA	NA	NA	NA	NA	NA	NA	NA	NA	NA	NA	2937993	NA	NA	NA	NA	35758	NA	756772	NA	NA	NA	NA	1485681	NA	NA	NA	NA	NA	NA	NA	NA
QC_exp123-colon_pre.bacolon2	84242	NA	NA	NA	NA	NA	NA	NA	NA	NA	NA	1815	NA	NA	NA	NA	539434	NA	NA	NA	NA	NA	NA	NA	NA	NA	NA	NA	2417040	NA	NA	NA	NA	27396	NA	910084	NA	NA	NA	NA	1156729	NA	NA	NA	NA	NA	NA	NA	NA
QC-exp3-colon_5b	NA	NA	NA	NA	NA	NA	NA	NA	NA	NA	NA	NA	152022	NA	NA	NA	NA	NA	NA	NA	NA	NA	NA	NA	NA	NA	NA	NA	NA	725343	NA	NA	NA	NA	NA	NA	NA	NA	NA	NA	NA	NA	NA	NA	NA	NA	NA	NA	NA
QC_exp2-colon_5e	114994	NA	NA	NA	NA	NA	NA	NA	NA	NA	NA	2145	NA	NA	NA	NA	594695	NA	NA	NA	NA	NA	NA	NA	NA	NA	NA	NA	2651493	NA	17253	NA	NA	32028	NA	1252221	NA	NA	NA	NA	1403441	NA	NA	NA	NA	NA	NA	NA	NA
QC-exp3-colon_5c	NA	NA	NA	NA	NA	NA	NA	NA	NA	NA	NA	NA	154416	NA	NA	NA	NA	NA	NA	NA	NA	NA	NA	NA	NA	NA	NA	NA	NA	732288	NA	NA	NA	NA	NA	NA	NA	NA	NA	NA	NA	NA	NA	NA	NA	NA	NA	NA	NA
QC_exp2-colon_5f	117626	NA	NA	NA	NA	NA	NA	NA	NA	NA	NA	2154	NA	NA	NA	NA	597175	NA	NA	NA	NA	NA	NA	NA	NA	NA	NA	NA	2711404	NA	21315	NA	NA	52847	NA	1260991	NA	NA	NA	NA	1389618	NA	NA	NA	NA	NA	NA	NA	NA
QC-exp3-colon_5d	NA	NA	NA	NA	NA	NA	NA	NA	NA	NA	NA	NA	154994	NA	NA	NA	NA	NA	NA	NA	NA	NA	NA	NA	NA	NA	NA	NA	NA	747113	NA	NA	NA	NA	NA	NA	NA	NA	NA	NA	NA	NA	NA	NA	NA	NA	NA	NA	NA
QC_exp3-colon_6a	NA	544415	2358837	48327	2924124	9535	880	31766	2925330	202799	10959374	NA	NA	358101	14429983	279241	NA	913	1806	3958360	1181736	1561046	138926	1203627	139194	1544783	801742	3637229	NA	NA	NA	794874	1520137	NA	1165205	NA	216371	247536	5449939	91535	NA	6822145	558219	704761	10023616	760498	705321	12149832	1495998
QC_exp2-colon_5g	120270	NA	NA	NA	NA	NA	NA	NA	NA	NA	NA	2765	NA	NA	NA	NA	603472	NA	NA	NA	NA	NA	NA	NA	NA	NA	NA	NA	2730180	NA	16335	NA	NA	32099	NA	1276651	NA	NA	NA	NA	1363300	NA	NA	NA	NA	NA	NA	NA	NA
QC-exp3-colon_5e	NA	NA	NA	NA	NA	NA	NA	NA	NA	NA	NA	NA	156632	NA	NA	NA	NA	NA	NA	NA	NA	NA	NA	NA	NA	NA	NA	NA	NA	752389	NA	NA	NA	NA	NA	NA	NA	NA	NA	NA	NA	NA	NA	NA	NA	NA	NA	NA	NA
QC_exp3-colon_6b	NA	547116	2351642	47717	3186820	9864	361	30313	2832516	201778	11306214	NA	NA	333889	15001314	286353	NA	1549	2622	3956609	1170896	1512116	123157	1178112	134467	1535547	801945	3587367	NA	NA	NA	796994	1496498	NA	1132661	NA	215024	222340	5315911	87588	NA	6861147	546821	695364	9869203	763940	694860	12121488	1491674
QC_exp3-colon_6c	NA	548026	2360691	48223	3422268	10399	467	34016	2964855	209374	11739090	NA	NA	339125	14674267	286526	NA	1053	2966	4068012	1027712	1532550	118560	1242328	126544	1574232	805680	3807522	NA	NA	NA	798694	1513118	NA	1136560	NA	216240	237163	4993500	94039	NA	7277819	568315	701020	10108661	781989	708848	12293874	1502015
QC-exp3-colon_5f	NA	NA	NA	NA	NA	NA	NA	NA	NA	NA	NA	NA	153674	NA	NA	NA	NA	NA	NA	NA	NA	NA	NA	NA	NA	NA	NA	NA	NA	721783	NA	NA	NA	NA	NA	NA	NA	NA	NA	NA	NA	NA	NA	NA	NA	NA	NA	NA	NA
QC-exp3-colon_5g	NA	NA	NA	NA	NA	NA	NA	NA	NA	NA	NA	NA	160545	NA	NA	NA	NA	NA	NA	NA	NA	NA	NA	NA	NA	NA	NA	NA	NA	757814	NA	NA	NA	NA	NA	NA	NA	NA	NA	NA	NA	NA	NA	NA	NA	NA	NA	NA	NA
QC_exp3-colon_6d	NA	553671	2458604	48696	3619901	10689	1067	33161	2772840	206925	12689302	NA	NA	349108	15335340	247580	NA	1299	3070	4149991	1245962	1625718	95007	1187121	132701	1591781	813294	3936450	NA	NA	NA	827029	1552560	NA	1178271	NA	224468	228353	4939256	96183	NA	7508617	584353	772838	10453224	868267	702570	12784102	1544301
QC_exp123-colon_post.bacolon2	87458	NA	NA	NA	NA	NA	NA	NA	NA	NA	NA	2034	NA	NA	NA	NA	534392	NA	NA	NA	NA	NA	NA	NA	NA	NA	NA	NA	2464705	NA	NA	NA	NA	24784	NA	933143	NA	NA	NA	NA	1161713	NA	NA	NA	NA	NA	NA	NA	NA
ATB-j7-exp1-colon_291	95	232733	62787	16724	5111525	9490	4203	32653	3386840	103366	6574654	60	4319	49547	28785815	276261	230	1239	1026	3490477	893481	669282	588259	1828049	45854	1166467	275375	973289	2277	2289	3402	556727	999298	87	914640	1313	458712	303011	6966654	80343	967	1899572	83044	577675	14341159	879008	371809	7997648	657019
HIRAE-j14-exp1-colon_323	38528	474074	79832	16952	2507002	6052	164	15311	510528	22511	3109578	1595	296378	129556	20340743	3186	714974	763	1203	662694	12533	503392	53150	745436	35982	967487	629817	2667881	4107075	1549230	50322	512244	1010876	32246	409759	388708	108201	108394	926580	15612	1533927	4798588	11839	39461	196913	285944	633375	12568	230277
Nacl-j7-exp1-colon_283	45094	786803	98130	5524	2552229	6060	102	6077	1300911	23097	1969623	1528	341549	195754	18029238	1785	757141	801	2138	766303	24573	688244	28685	595144	81248	1071789	765508	1744581	1594467	1604890	56555	545277	903347	38223	668260	350405	20196	222126	256691	20594	1888108	3336863	20604	51275	270501	215317	326555	24506	267835
FRAGILIS-j7-exp1-colon_305	155612	474088	41155	20908	704578	5375	508	14244	274735	44497	2160527	5218	120914	142689	10227669	3289	1418098	1511	10003	2694419	18122	890033	52892	390346	90686	1135556	1021056	2714592	9644191	586301	35790	536662	1019529	44889	937566	2152431	50235	55807	728573	50866	4632227	5148122	17487	181593	367666	276616	855792	60459	334495
FRAGILIS-j7-exp1-colon_301	159150	356571	22605	5658	2803426	4047	364	7927	251469	29562	1272369	1661	120384	133492	10648154	1910	1953025	1303	16228	985501	32345	2338539	32119	144953	62277	1068812	722531	982702	6508097	382026	50132	581056	965051	18770	806947	869029	32577	76417	439470	40200	3833833	1890011	51488	215111	318443	221737	866267	14217	534255
ATB-j3-exp1-colon_259	28	264183	20451	12723	4048183	12681	5788	13943	4281608	190898	8554933	37	5954	76386	20214381	446779	157	643	1872	6113531	1852308	156498	1122251	2074011	46425	1451428	390799	1067660	1863	1788	12720	511049	936964	160	289825	1198	123168	366004	3932864	124867	907	2060012	194368	1101391	27827895	1599652	500643	15583073	2441039
ATB-j3-exp1-colon_263	42	267607	26288	13011	4424491	9466	4949	35431	4159257	243621	9418655	13	6042	65612	28224997	809843	172	1333	2232	6716900	2068488	537816	1150190	2058717	66031	1457099	355607	1448885	2000	1501	8040	522485	978943	73	946856	1512	233997	351847	9939543	128690	840	2791863	215301	959459	19389318	1179368	502163	13559059	1292528
ATB-j7-exp1-colon_293	42	189744	16225	8361	4987652	9786	2618	22562	2947663	115748	4600094	17	4397	50759	15053757	403048	135	1137	1272	7079611	1361533	487325	155923	1086618	73875	1027691	224710	713637	503	1113	10929	485960	935664	69	943932	909	124017	110591	6963632	89588	452	1386909	116504	805388	34671138	848590	403054	11455686	540507
BARNECIELA-j3-exp1-colon_277	20974	4516625	75469	41446	4103064	6464	3276	16494	1692425	274937	15845314	878	100769	86628	19477248	442807	32808	681	2222	228488	104114	470799	42013	674395	77337	1596562	384726	2363238	452439	49322	33657	604398	1008449	3384	486988	462667	45976	348300	7532017	132874	1221	4443524	1110057	942565	1126901	771742	916495	58129	955105
HIRAE-j3-exp1-colon_269	267	2170871	108294	22597	2868085	10050	20492	34216	9767228	324962	20400646	36	36722	89908	40505258	543506	2061	1013	2387	1725394	2123835	438957	1659341	6081428	85154	1374507	787193	1712173	9707	4066	14774	517306	943484	261	563022	12053	101866	524647	7411414	43667	2839	3212448	1238546	863194	894189	1546559	1464964	17503255	258138
ATB-j14-exp1-colon_314	31	228477	28621	13114	4966741	10817	4024	29605	3605524	182093	8125033	9	5443	63171	22383919	484644	296	883	2481	5219258	1574558	376484	582501	2200612	73999	1283265	271394	652658	2392	1632	7237	565884	1089675	244	985883	1231	174695	261115	5845498	99285	1122	1212316	136766	993573	19437247	1551254	469628	13441970	957790
BARNECIELA-j3-exp1-colon_279	24833	7151539	73588	46721	4714526	7638	5660	20463	2376572	471243	18070421	1098	99884	94872	11856138	1089446	18263	480	4735	447781	78924	353061	35334	702179	60830	1437128	460299	1350337	83352	55485	53216	529802	938942	1145	483687	420275	35638	387596	9797811	66044	334	2541642	1354880	1264638	1387746	1023208	1090550	44280	458680
BARNECIELA-j7-exp1-colon_309	208604	366299	232553	45553	3206034	6529	1695	15272	749368	308503	11099216	5520	128070	84897	14873356	480802	780369	820	2121	401529	13581	1012750	46969	1229215	74036	1391610	874753	1331674	3050049	226551	277	572172	1080120	38992	725109	1818128	46420	126858	7335398	85672	3396	2434461	30490	356717	182292	803608	957876	16463	273451
HIRAE-j7-exp1-colon_297	203812	690472	108280	16488	3047500	9666	1184	12577	584253	62244	3706412	1490	203017	108749	14556192	2942	472061	830	3261	1224269	23285	981612	67283	800590	80922	1215151	876505	1848489	3652669	1043735	148149	589192	946620	28131	482474	496773	92857	149650	8205447	29712	1043357	3486853	14623	122727	220539	540781	877306	35732	963037
FRAGILIS-j14-exp1-colon_327	264927	556202	121657	69063	2517083	5368	650	14622	1382364	117518	7261696	5587	271825	566001	25844798	3012	3982415	1227	3308	1517546	31415	1006233	131331	2419600	80362	989596	876441	1792245	7818610	2307698	74918	519930	1036346	194637	782365	1861099	51408	530366	8158648	36511	5167843	3291374	22598	116111	510555	418818	398487	27045	370236
Nacl-j7-exp1-colon_287	23818	1175750	166394	4439	3247282	4888	385	8947	1062812	18240	2336044	1053	384574	219046	21833389	2385	524281	779	3257	3629413	23448	279957	32102	665848	96845	1032502	1157944	1969817	807658	1700194	34295	543110	942146	13321	579652	190800	20259	302687	721577	31877	1085383	3717711	26017	131299	241644	452530	587282	21636	355989
HIRAE-j7-exp1-colon_299	350740	217286	103235	21189	2377840	11131	740	14152	569452	108814	4373857	3926	177060	217284	13663032	7161	1021695	962	2957	262571	32286	845154	79007	1124659	148952	868536	1158889	1283108	6521255	698639	101161	512108	966710	57613	722637	645667	65979	161170	8520943	34025	3781855	2428246	25931	93102	216646	510734	963540	41943	357218
HIRAE-j14-exp1-colon_319	1295	438529	66910	45862	2501459	7601	1084	26675	647407	55675	3710801	859	222610	157738	14002956	2712	425381	1058	2089	928807	10553	1335095	77920	552329	120445	917938	1292937	1354743	1477655	1179428	60786	525235	982020	15851	623382	41709	151558	92255	1493336	41515	1564006	2594214	16146	74986	271359	317720	961785	15920	552928
Nacl-j3-exp1-colon_253	84539	462910	77059	3438	2812067	7570	420	3994	433498	16917	1575102	1947	240411	112279	16102551	1896	769613	399	1399	517261	16447	258685	11497	375162	37425	1036183	457641	2488548	1714177	1169387	56658	552886	959982	52869	286401	667716	19327	110209	310190	19826	1837126	4651714	13117	73577	146112	350445	139112	16702	103455
HIRAE-j3-exp1-colon_267	188	1361937	38736	9748	3898464	6067	5513	18412	4985575	230626	12706357	277	13385	108403	37086155	268054	1987	627	1946	852369	1272073	386550	1109472	3645064	40364	1383131	406876	1969816	9741	2085	21253	597425	1049461	1300	319147	99738	69717	500335	5658255	54136	888	3680303	687878	760431	521456	624292	662962	8847653	194306
BARNECIELA-j14-exp1-colon_336	72685	1380943	343713	5092	3697133	20795	529	11221	676251	28838	3843561	1929	369014	215986	33201443	2817	318225	1593	8370	2205840	47538	1567089	31557	1409480	168156	1345844	4105787	1299741	2219827	1206448	76991	682914	1222651	94193	1158144	964085	25483	545383	6031414	178891	7265	2433835	38085	303852	516442	686535	1012947	47557	599165
FRAGILIS-j14-exp1-colon_328	110696	1299803	135873	20069	1187844	6524	346	14094	808157	54046	4810658	4038	296801	779301	27170798	2981	2027618	1290	2992	1656139	35546	1410653	89283	1418620	94910	1375247	940620	3592649	3269735	2091573	96701	734804	1181144	77892	807764	1021287	30061	415928	7496087	34347	4261818	6672105	21965	165895	439340	352278	314100	31922	428144
FRAGILIS-j7-exp1-colon_306	42462	399886	64005	13282	3132745	6785	745	14067	328441	60468	1865206	2461	204638	290427	16254293	2975	1689934	1326	6093	572886	15026	1564254	36312	266607	53181	916115	951569	1613525	11050745	896309	17579	594947	1127256	NA	962255	723646	22836	104557	2293347	24602	7416930	3068649	430928	172493	297157	286996	863015	22912	285965
ATB-j14-exp1-colon_316	379	342857	28612	15045	4985877	12604	2178	22799	3736335	200036	6919532	11	4964	104156	19653242	580002	908	742	1434	5312526	1320944	389495	640420	2077088	57230	1126284	308977	1116370	6249	2892	3951	534606	1059852	27	819430	5065	222995	337575	5452959	136728	1842	2104019	195393	799576	24850696	728902	434572	12415537	845418
FRAGILIS-j3-exp1-colon_274	17445	511460	5569962	46232	3302592	7793	167	59677	8241451	198326	8812928	419	102441	202939	35071287	424959	359263	1132	2072	473593	21930	975008	31229	3175132	120305	1219864	859682	1309681	3624871	92236	66143	572675	994140	17968	1324790	313633	439793	232322	10263085	58103	171002	2436099	36196	767743	583332	2096459	1183977	26427	475511
BARNECIELA-j14-exp1-colon_331	40225	336921	246064	44333	2454369	10708	1630	38990	1317860	64507	13707576	5573	203784	416638	28245633	967	548434	864	7929	882004	53991	1711465	77218	2106121	173236	1613242	11005638	2944616	1774605	1408429	54604	779259	1323143	52924	531560	463612	39853	369464	7725833	85522	4870	5174917	24743	289950	494310	868381	2233439	58055	485467
BARNECIELA-j7-exp1-colon_310	23803	252202	234297	31124	3001690	5286	754	5929	605479	237833	5388727	858	139749	60919	6876636	243919	147109	283	1414	224103	12807	966884	33210	1330249	25448	1145945	774391	2332325	398327	246913	27523	624845	1131995	14621	273388	207628	18473	134836	4204281	300529	2426	4327179	14498	159821	194756	384743	400979	21406	122968
Nacl-j3-exp1-colon_255	48594	892484	47943	2332	2587998	6317	332	4197	580699	23018	1645367	1686	353166	100064	13271272	1652	613961	772	2723	1060550	23068	402437	19785	342830	82102	944932	318913	1560012	1616421	1873663	35456	447861	791564	39400	486226	554784	8655	326817	232909	22264	1447833	2378373	19332	95914	197710	276483	186075	38762	193085
ATB-j14-exp1-colon_317	30	260971	18900	8299	4404446	9562	1496	11813	4222853	184341	6186390	31	4663	73063	9368322	438945	537	1036	2077	6324347	1787958	185537	265187	1327067	69532	1585289	265917	565481	2097	1957	4201	636159	1141281	238	484988	965	77233	180761	5065746	99799	1350	1067789	173766	1079839	27875583	782890	461958	15032173	521474
Nacl-j7-exp1-colon_285	79744	267978	114984	8000	3055291	9418	298	5435	358637	25778	2525568	1499	145959	177288	10060147	2263	442660	488	2349	241939	15437	493789	12631	916099	46089	1354545	308543	4808591	777251	502303	10159	581682	1075079	61896	517484	619043	20323	177285	1147045	48925	874932	8832838	23507	92684	135944	358629	303763	7233	114406
ATB-j3-exp1-colon_261	571	196054	23714	5584	4341908	7155	2209	11386	2770489	138473	4915242	68	6027	55675	15798431	348896	1045	562	2560	15472569	1255067	496553	267331	884967	45674	1207366	209169	888439	13411	1614	6402	496621	948819	487	522529	14470	108219	157510	5504695	152186	723	1663246	161447	836971	26316962	658401	330788	9688283	1659625
HIRAE-j7-exp1-colon_295	1217657	857341	177366	20972	1473728	11246	1500	35870	1017447	152723	6394980	7479	246617	284366	39040344	230116	720105	1655	3559	232825	30532	2537374	111467	2684450	113511	1240418	1466245	4451411	8243063	930639	39293	655278	1014221	82559	1430818	3195214	83055	441401	7684604	98915	17426	8119830	22817	189502	276130	640609	891442	62253	353661
Nacl-j3-exp1-colon_257	98744	329407	222747	58093	3364365	5218	424	15604	968754	96478	8167908	1333	222042	346100	18979270	1527	1492484	444	2612	505539	17941	662985	27858	771049	49917	1215967	677249	3059107	2369044	2258422	18016	620366	1056565	44155	483914	392019	41761	197301	150411	39444	3022764	5672590	22367	68760	267174	331685	261395	16128	200080
FRAGILIS-j14-exp1-colon_325	56576	371276	397046	86553	2149865	6290	383	19986	1728263	102725	6577587	1836	314246	356962	18960292	25252	1599721	1088	5102	424366	29850	434463	60670	841992	103449	1280051	830956	2159498	2663056	2590331	48730	616997	1140992	104206	672382	628254	70720	242194	8919949	40619	4088593	3573425	26307	59700	265748	329651	277684	35179	145242
FRAGILIS-j14-exp1-colon_330	103100	516191	175550	40495	1575676	5635	595	17729	778269	47784	6699750	5026	183192	411694	17395036	3310	2510800	1254	2943	2002550	27748	1332429	108679	2442708	94951	1125031	652230	2842889	4510904	1370297	29491	614027	1152730	106032	766106	863329	64981	260358	8455706	44052	4425181	5292341	23060	148803	347826	339353	248732	22407	500918
FRAGILIS-j7-exp1-colon_303	102787	301696	166128	75832	3657646	5330	2409	39086	774704	49383	6457056	2533	143391	323605	29776447	8921	2497817	1170	2922	569419	27681	1526618	159293	1633535	110236	1215684	2413316	1690675	6042014	796865	15107	580308	1090450	2511	1285932	456668	256808	205067	4316792	50135	3858068	3234541	30946	197073	352173	820277	1368479	47125	285311
FRAGILIS-j3-exp1-colon_273	2740	25457	1446137	3486	1395649	1965	743	3299	2002480	59256	1571138	87	71598	67183	389286	99807	14087	31	1580	181516	39937	56204	2540	320040	16706	704869	100355	27	238415	15395	38221	146866	276612	3923	92430	26199	11030	52867	1145199	33253	7766	9633	228357	176703	520759	278380	212312	51769	41023
Nacl-j3-exp1-colon_254	130780	1609969	159950	18780	4091297	6966	688	31144	740440	75320	5689383	2697	315651	196150	32113244	6529	1615718	1406	3817	777660	29781	2443643	35440	1585473	122598	1324071	873467	2431116	3006492	2809005	18495	627509	1025789	152023	1136742	1068352	78343	424904	3367847	50599	2901085	4419461	25675	97609	248808	510516	284818	26091	365374
FRAGILIS-j3-exp1-colon_275	27187	528022	7618887	62390	2901861	6915	260	40253	9178486	327835	10917729	320	120617	174402	25554082	384217	427760	768	4115	3356233	38291	588734	31796	3003023	91667	1521660	1020247	1355552	5632431	661556	48573	581302	1033828	24488	573822	357060	69353	189228	2125520	61120	82146	2496898	50328	843845	2176747	1090326	1383563	42572	550800
HIRAE-j14-exp1-colon_324	14646	791090	41952	7664	2428074	6602	150	9927	436913	19661	3070022	858	305868	117540	20065176	2417	2062937	776	2921	1161302	21367	253052	41080	470602	164076	1527124	1180729	1755008	6050141	1398263	9632	731019	1258288	1422	536350	279078	46269	132204	246362	39532	2512521	3269780	18022	186402	121426	467772	964458	21785	150787
ATB-j7-exp1-colon_289	44	224463	19864	7147	5489450	9668	2075	15672	4237030	149565	5602744	17	4071	84040	19446492	428880	456	1018	2404	6306262	3145530	2843747	298001	885239	99357	1303786	231915	787573	3414	1957	1955	594659	1077386	47	916214	1400	108842	373614	6443560	167604	1173	1468894	173178	1023387	29324455	605769	430875	14417031	636198
ATB-j14-exp1-colon_315	24	152110	57104	14697	37027468	24110	3546	37009	2485369	264756	13132798	6	4597	114450	1505821	188737	401	1422	4254	6247006	1891332	372317	236148	1649213	79716	1499331	394728	6819842	1921	832	2828	614909	1264465	111	1214421	1211	388182	177292	1927311	116408	1363	12463100	168993	1216779	32566325	1445741	445699	17491970	2429121
ATB-j7-exp1-colon_290	111	232144	42324	18588	5031904	15354	5549	24277	5866674	369635	10727458	30	4888	107334	26727027	871749	592	972	3486	7461277	2115745	481938	1034521	2494394	83710	1625918	425993	1107215	5522	2057	2851	601035	1042926	82	815509	2417	175326	434476	7396569	193338	1775	2031339	212690	1554737	29469040	1898810	626593	16626360	1358666
BARNECIELA-j7-exp1-colon_307	73154	298540	128469	40695	2995025	6482	2393	24880	554745	639634	12845634	1569	101805	93189	16047537	1691587	317482	1147	3566	414879	16421	2060175	35438	847421	84202	1311171	967566	1252021	1420997	174652	7456	637317	1099595	25700	888978	754817	78113	95590	16875191	132831	3570	2137668	25272	905453	209854	890592	847235	18075	195224
BARNECIELA-j3-exp1-colon_280	9322	6840246	81536	71849	5276735	9098	2678	20164	2846519	432897	28510944	493	116257	111200	11526038	421837	39862	346	3924	614071	87722	229985	47330	929063	67565	1850594	540738	1668682	580366	78313	19086	595201	980704	1868	317894	186257	31115	447512	7744831	112666	1509	3105444	1450890	1244673	2332888	1314206	1070732	47812	944328
Nacl-j7-exp1-colon_286	180501	1275798	153513	5908	3897651	3961	413	9593	1124913	23323	3194183	4538	144216	208873	25727656	2368	1328406	879	2421	498246	16548	931432	13025	1013578	38232	1427626	468478	2738459	2495206	896406	31472	664768	1091892	88346	630537	1464413	33018	183106	2233771	40112	1622456	5056763	16607	136533	148426	690606	328014	8418	161081
Nacl-j3-exp1-colon_256	121391	495985	73231	3301	3308821	4156	459	7542	554836	13033	2043454	3257	174126	356511	15898006	2111	1251955	1046	2456	757253	22335	1233647	12701	329649	75800	1144391	439640	2006804	2597751	660585	22194	536931	981551	75888	936579	871883	21017	145176	1388744	32712	2735501	3592831	25478	101224	202133	504540	294459	13789	271273
BARNECIELA-j7-exp1-colon_311	31024	985565	1086578	37955	3851503	5708	1791	18391	618748	451185	15568032	1086	193720	101511	18161470	466201	95029	724	4996	601119	28500	1037168	31581	944214	56118	1443888	708367	1574888	574540	391230	7404	632211	1124311	13232	548738	497969	44897	156166	8415748	68500	5198	2905470	37600	810458	402483	744835	666799	16927	350761
HIRAE-j7-exp1-colon_298	497435	316981	177873	20253	3327433	10508	2306	15844	1709548	45227	3838586	1998	209479	263328	15248795	5350	622304	874	6132	319201	42172	1385927	53742	1187011	177644	1027982	1618071	1514964	7009897	746011	28271	573668	1082763	155497	756289	517369	86963	188681	11570131	45009	2896696	2806452	29220	249716	220803	564094	1197421	35033	256672
HIRAE-j3-exp1-colon_268	165	844444	50125	18520	4819214	7299	10804	27133	6752407	368381	17860401	25	13927	138706	27772886	648382	951	711	4170	1426345	2246210	853829	705676	4451380	70932	1455917	448735	1192011	5840	1890	6314	598012	1081708	465	518684	21797	151566	436216	7575240	79532	1942	2176223	1087331	1142266	787282	1128140	875654	13753095	272952
FRAGILIS-j3-exp1-colon_271	9310	797477	13687239	101858	2819848	11659	3342	36138	9901363	334416	13819028	308	116501	390692	18852152	579795	69558	820	6456	718690	220100	394737	31043	1420596	135242	1895097	1178923	2261143	1138139	18335	40714	722800	1225513	4232	682703	81586	154077	258429	5529831	60726	59353	4201727	1469295	1731061	2907975	1898080	1647015	78203	341207
BARNECIELA-j3-exp1-colon_281	9456	3872928	124823	30919	6263350	9665	4024	43907	1813517	171016	15228832	479	72722	110654	18504481	236111	7285	1455	3550	267595	54884	856462	38608	1147191	96658	1420200	452923	1282887	44211	45531	41637	556960	1046184	672	962860	201853	216486	524099	10570166	66775	853	2568366	1241197	962508	1413557	1001610	1184394	75916	2259742
HIRAE-j3-exp1-colon_265	374	898711	49330	8186	3790015	5641	8233	28736	6434774	258175	16850241	122	19841	133665	39764940	305595	1867	581	3156	1021751	1575378	642798	848600	4445514	64634	1467109	445928	1329445	8539	2360	17576	585775	1088702	377	496420	25658	41027	504595	6525400	76471	2551	2396228	870305	979330	679883	1124461	840504	11765641	218282
HIRAE-j14-exp1-colon_321	17532	519190	45898	9692	2670156	6960	642	12133	413122	26458	3146244	307	248032	100114	9439632	2512	597848	554	3373	663719	20972	427104	24936	400034	110104	1287134	792930	3084363	2998174	1171357	13343	548426	1118646	8305	558821	339826	79423	68046	216571	29729	1630000	5560715	17354	134090	147514	657426	463078	58942	218649
BARNECIELA-j14-exp1-colon_332	51960	664941	153185	32691	3056573	5838	408	21298	752266	23227	4055542	7588	300457	203407	17927094	2377	118799	579	3646	2143669	26074	1011306	42790	707949	149218	1273784	660376	2456262	584074	2091312	13314	676824	1188436	41084	572087	769886	71775	185127	6247026	33136	5755	4442303	18343	227737	366661	657017	185936	25012	670051
BARNECIELA-j14-exp1-colon_335	84354	427901	214734	72053	2990467	10370	948	44195	712250	60084	8139339	4475	267643	158880	14404154	2828	372273	683	3385	389021	34028	693148	59327	2525182	108066	1247496	1101628	1653597	2720678	1869433	13625	695172	1205179	63353	502013	1136918	59907	227026	5598941	41309	409	2986072	24887	169295	336217	762836	351971	23500	211695
FRAGILIS-j7-exp1-colon_302	168967	543086	2369368	332683	3722734	9404	506	50506	1724303	330596	34048072	6172	200637	149266	24033207	273041	613333	1592	4214	751085	47492	899410	69977	1780426	131054	1265151	1261005	1549250	8706647	92895	9323	562189	1021086	25654	1233668	3556940	174552	318301	10303412	102903	4076	2845841	1932657	634656	596753	1557346	1067878	2027910	368048
ATB-j3-exp1-colon_262	277	305398	36779	14023	4324081	11792	3369	25933	4827336	271783	10172593	34	5475	103908	26097042	630339	647	1133	2788	8649925	2339011	342712	533058	2319088	62426	1409860	398842	961196	4463	2592	4967	529888	993307	59	620183	1964	220997	272417	7170506	165777	1397	1834984	189930	1461685	33918007	1597227	531720	14132620	940317
HIRAE-j3-exp1-colon_266	130	2831097	108627	24303	4422419	12480	18394	47373	10236677	599451	23767076	34	29953	227543	45388554	1052934	913	805	5133	1663644	2485785	360298	1365114	7797611	96234	1944721	805970	1301647	5423	1497	17052	677758	1118438	244	653665	10352	108526	786146	7257987	103051	683	2314333	1144027	1745537	883046	2605222	1290303	15767001	288794
FRAGILIS-j14-exp1-colon_329	106568	1693506	82229	11739	3007467	6292	398	10367	631004	49577	3924861	3458	268486	382074	17930440	2342	1625663	675	3295	1227287	13655	841279	29417	797748	79719	1156619	386270	2887229	4170645	1722087	41861	578469	1131128	111555	545701	1103176	42365	336897	5699917	38472	2629175	5336405	18156	188215	254708	770106	231213	20020	347427
ATB-j7-exp1-colon_292	41	336081	33524	8840	5011946	15691	3132	25575	4709183	162653	9184752	22	4494	99461	20440399	261638	184	779	3016	5690671	1575485	313550	630789	1889377	79293	1640986	352147	1097353	1533	875	5889	643761	1105442	141	810894	741	116638	371045	4139673	156809	1013	2034774	136893	1249111	24833443	2036768	537184	12623718	548862
ATB-j14-exp1-colon_313	2042	395624	58014	22532	5789481	13306	2153	24624	4237739	274016	10864480	162	12420	105555	19603639	605709	9569	929	3632	6765654	1639045	408113	358294	2509338	95598	1701603	362805	1055480	39667	23253	3660	652285	1228721	799	998279	20936	258547	317529	7016012	182985	6563	1980694	190316	1456073	32857142	2054754	607901	16674960	902930
Nacl-j3-exp1-colon_258	121372	744777	221643	13594	4079070	6833	214	21760	1069463	36677	4327165	3873	323501	200485	29296107	3907	1249863	1115	3555	1022535	23843	733890	25303	948011	90466	2047591	997446	1491721	3259921	1550911	35436	616999	1029618	42803	825900	945754	43230	310494	1106049	41623	1301745	2801947	24497	140576	327930	949546	317671	38961	270175
Nacl-j3-exp2-colon_200	258326	415568	59654	4640	2775644	5250	733	6897	279408	9636	1484656	9069	132456	280561	9331222	2458	1702646	995	996	1554732	16451	1064346	18819	447304	81045	838136	320746	1667712	4078780	610425	9088	471187	963714	95867	821014	2565856	28537	177838	1637079	11416	3121536	3312377	12855	52819	243310	117009	360694	11993	248509
HIRAE-j14-exp1-colon_320	263431	294411	3989426	42845	3276102	7523	201	16044	857683	152455	22160648	237	135909	164543	13163312	3063	383464	776	3716	387112	17356	285681	35519	732985	92220	1263324	2126014	1002415	3611454	117139	2518	592983	1072188	10638	542700	1004952	81501	138586	13104025	55240	1611	1919427	26763	373688	243477	820646	1537844	23525	337201
ATB-j3-exp2-colon_208	887	200884	11161	6876	4176803	13457	1908	7198	2229331	113834	2755459	172	2634	32000	8799953	457837	2430	573	736	8180203	1292518	238982	246407	589206	71585	841675	174751	1726434	27977	806	4498	477968	1037423	864	426703	21770	42642	128696	3831383	79269	1960	3412640	103608	514913	17311543	217421	284608	8790609	501710
ATB-j3-exp1-colon_260	1139	225373	32601	13743	4446112	12794	3848	19317	4898830	307437	10855621	122	7898	96549	28093308	678590	5719	589	4163	6308291	2054874	479321	1013583	1800645	83018	1592458	442912	1533891	16715	15324	3828	551919	1018047	389	635799	11861	140172	550455	6759250	174361	15748	2891409	201101	1248054	22411738	1367600	525865	11116848	686687
MITSUAKI-j3-exp2-colon_220	11436	400543	1511200	337702	2852230	11265	554	10790	6832322	221517	11220210	157	45982	364109	18724422	587422	27768	411	1298	285030	2009816	209542	21655	1841574	71036	795485	339449	1270642	469424	15579	13444	434192	995532	2756	563086	83480	101088	221785	4022778	13331	1771	2477799	765872	575433	764713	550773	1000963	13750362	201824
HIRAE-j7-exp1-colon_296	563010	339595	104298	7566	3234423	8978	230	12504	488579	30408	4639012	2311	224844	154776	28423085	2979	809321	475	4644	462764	27453	536969	41778	1178562	134220	1156567	1015395	1588994	6304852	606256	48429	572367	1043649	68485	515424	787293	44555	113691	6051571	45046	2776247	2992729	16024	176415	357606	787306	922076	72931	623003
ATB-j7-exp2-colon_232	72	237788	44892	21468	3799154	13139	2646	40545	3424438	180084	8404425	8	4324	62504	24558867	612678	655	1118	1045	8548398	1879779	526319	1380509	1774181	91384	1179789	352490	3112671	4260	2347	4330	563651	1238080	392	1013187	3458	545307	461200	6522656	100829	1907	6139552	172209	621726	12415486	732688	470479	11144836	834729
FRAGILIS-j3-exp1-colon_272	4374	393650	4154061	37333	3466622	5476	2025	13846	4486023	194640	5239139	430	97311	150555	18622064	285138	65632	717	3526	440898	50893	214605	13223	1017689	51083	1567510	429665	2546771	1075945	13085	25138	563620	1055578	3335	457165	43549	95037	110013	3737759	39558	13840	4618293	391938	863673	992649	1225533	781711	18955	138371
MITSUAKI-j7-exp2-colon_244	1298051	952855	69946	13166	2605326	8689	1231	24890	403501	16169	4520003	28725	97571	71765	59021527	12963	1945416	1658	1348	352109	59798	3525043	40540	1660099	82805	724654	996090	1748898	15535681	294141	33231	448524	1055819	177243	1383667	9362898	57819	288598	6767229	11313	976577	3471823	609611	135522	500436	216372	345791	85051	511118
BARNECIELA-j7-exp1-colon_308	134406	1209187	84807	10338	3849279	8327	1715	11847	519589	30019	3357059	5889	236572	111520	29312886	2228	1351509	1332	3648	1932156	25019	1414329	33370	713338	94349	1249088	957914	1442493	5535810	1387635	749	643250	1226364	143206	1072280	3088670	46997	328451	6233240	28765	1238714	2591079	81269	502456	290185	728118	431927	26698	602732
BURKO-j3-exp2-colon_214	8261	449250	5742264	77086	3286796	14201	1717	27642	9001969	345502	11889654	90	64290	557844	19043043	1066481	14367	879	1392	960222	2515773	559234	27194	1624762	90124	934670	424384	1987448	410828	34022	23181	455740	1018129	1197	815365	74790	109616	295989	4317712	77624	3332	3907571	1594042	811655	3320696	831868	1326601	46912	219978
Nacl-j7-exp1-colon_288	45312	658965	89241	3840	3376725	4128	577	10155	730884	14492	2316354	1603	98415	116587	12501352	1291	696666	1087	3249	954265	20577	607328	13706	442368	86651	1419993	381906	2624309	1267271	574783	21148	668564	1095197	36475	682057	352067	46406	126618	1351441	27015	1551139	4812234	37283	159788	191250	529460	274727	11593	292960
ATB-j14-exp2-colon_251	346	204349	31381	12449	1682587	15018	333	18467	1950445	166864	4567699	36	3905	42297	6313507	485655	1879	978	1000	4926243	1231229	284085	117247	971526	72497	712358	191719	4322204	9023	2241	5974	421648	1040032	143	806825	5920	142908	73449	3006394	60166	3347	8672187	97077	518756	17835156	379931	277542	9918484	511325
FRAGILIS-j3-exp1-colon_276	21660	611088	2153694	21699	3124646	6326	1955	18212	7872824	356488	5285598	651	121616	249874	19561831	372217	277059	567	3783	541672	33638	581566	16551	965223	77574	1535179	784717	1475440	3335533	103945	25611	611574	1028787	10830	431051	212313	51871	176758	4956702	37358	3583	2715760	29805	1072233	1732839	939748	1262989	72210	363149
Nacl-j3-exp2-colon_201	10969	564783	55932	4896	1225080	8141	335	6374	321468	14292	1969027	343	274379	101077	8976194	1935	372968	714	1351	1984985	19399	302203	21323	407249	120770	791211	583562	3681638	714407	1442783	23547	466810	986819	28524	589239	132666	11935	197273	193918	9633	860412	7313955	15413	67219	227574	159682	460146	35014	261528
Nacl-j7-exp2-colon_227	314384	1410215	69023	3719	700429	7894	350	5670	338541	9536	1874414	10631	191065	242056	8502045	1416	1585244	869	1829	3230782	30281	940540	23043	331976	124421	799564	559032	4419601	6074949	758635	11856	483159	1034564	209935	705749	4065967	5480	247739	324613	14155	4033099	8758578	17642	91127	477156	165489	276351	28743	488177
ATB-j14-exp1-colon_318	375	318113	103933	10517	3960375	9757	996	33700	2967662	137522	7585654	64	5527	84426	20660515	174152	5042	1289	3367	3955681	960583	718284	242561	1523467	89141	1717623	268721	2274708	17932	7767	4634	612920	1188378	30	1087857	3171	438782	205309	8199862	98318	9887	4152871	107984	804270	18753499	1347019	364129	9144001	1025397
MITSUAKI-j3-exp2-colon_222	37439	444434	111212	65595	3657353	7302	297	8622	3817729	174775	7542339	2147	128822	61634	12807583	398845	244458	372	1088	2057806	683346	124457	12439	344284	29682	1054547	188674	2649567	3433689	9405	15696	532470	1170959	19872	374711	1587571	48544	119928	3158202	14751	11093	5198403	1523445	394735	2214132	247240	785753	6244470	895498
BURKO-j14-exp2-colon_257	66111	651290	131911	40347	5029616	7208	561	44032	617912	236859	7790198	571	149662	105263	23416639	495147	199450	1414	1493	482222	23801	2282314	38298	1627750	63111	781993	1262048	2519424	2506926	348515	21815	433028	1003109	85592	1007843	1228970	260060	270209	6220367	123277	3741	4979661	31827	350433	175164	632584	571677	17611	473854
ATB-j3-exp2-colon_210	1134	209561	25190	13026	4679215	13569	1774	24701	4014922	170925	6928049	131	8918	74529	12405451	551610	17250	934	1024	5601037	1948309	541658	418185	1412496	89638	1000491	343496	1931202	46185	30707	3964	501591	1183504	358	1006092	8806	268821	222463	7389632	132680	20579	3764506	152125	781523	24668418	634300	514859	14264170	706421
MITSUAKI-j14-exp2-colon_263	14163	353279	69940	62075	2543955	5955	343	24440	560250	39593	3616414	899	165733	67065	8624931	2738	841059	1087	1356	3565591	20647	2253916	48852	1176305	143065	747541	312960	2500454	2041794	1332432	17961	487203	1098881	56401	635569	171242	28140	90910	6668134	12196	2296821	4968424	13978	194845	261449	203715	679115	36908	325646
BARNECIELA-j14-exp1-colon_333	57894	758430	135926	11914	2283361	6332	131	12007	661367	34171	3487383	1540	213839	107517	8514230	2278	227877	751	9470	834791	22330	774946	23613	667922	83679	1279200	454026	2138742	512557	923279	8982	638923	1109982	26895	532518	569568	75903	91148	6694515	50052	37685	4003890	20538	240947	286312	669302	248644	40362	387408
BURKO-j3-exp2-colon_216	24443	1466318	436866	44264	2622056	14332	243	39982	2443614	185256	9192349	259	115664	957983	25201538	374914	73621	1159	1674	1392081	569936	835405	19760	1182855	97736	750915	587155	3997193	1373312	258623	51833	444163	1043462	2166	1240590	196895	255965	174319	5267130	23945	227870	7896563	30785	138939	5308834	1198320	760318	70847	912379
BURKO-j7-exp2-colon_238	5890	1067924	84505	2860	2695773	7689	448	3535	229706	9179	1168584	1184	200195	45972	9711007	2394	136727	950	1807	260691	15078	480325	12703	459674	54719	993301	443477	1845289	478176	1015191	68561	560832	1216353	23736	564838	346762	6799	150509	2320851	9108	816581	3640178	19592	64298	542985	92733	497416	34674	690801
BARNECIELA-j3-exp1-colon_282	34590	4168286	48805	35558	4618842	6556	6112	16750	1719971	323066	18228158	2029	37837	157941	14547300	420677	101425	1006	4243	391333	41016	867167	26163	450409	99887	1681831	290571	2328491	1235966	39075	11450	635929	1135730	5253	550836	681784	28070	469484	10774028	292827	881	4247284	1421987	1157985	1180358	762747	851066	50103	444791
MITSUAKI-j7-exp2-colon_243	235218	324132	54973	3148	3360269	12337	300	8443	483028	9016	1176516	5962	157268	74502	12694181	4811	1502152	1397	3531	718547	36269	3280787	18527	269517	89104	831726	767784	1976043	7639058	510783	45834	499978	1092644	100965	1136069	2076049	13681	161446	5013316	10852	3227853	3869306	40803	196297	445876	156506	630977	79780	1398567
HIRAE-j7-exp1-colon_300	473476	288339	157037	10141	4804707	10114	985	71987	2144599	406027	6639723	7075	160462	241581	38210598	809773	742114	1670	3108	206207	332550	1065131	64700	3131787	66881	1162499	1025724	1433640	7249276	340578	21109	629726	1026466	35795	1511854	1947787	137171	329829	10904840	81016	2415772	2670852	1348506	202911	285527	1354363	601809	61013	237942
Nacl-j7-exp2-colon_226	230268	1078752	210588	8600	3414423	9934	1188	27347	2184166	53463	3629154	5850	182473	436180	25810077	7407	2198114	2118	2522	2669823	54680	2385036	32654	995044	174409	931328	932147	2056241	3895072	757339	34673	548412	1143906	155669	1621401	1922275	69854	565580	4066481	24002	4402044	4041292	85848	109082	706062	366871	841117	46353	708370
BURKO-j3-exp2-colon_213	32156	456789	4798126	63548	3223636	17711	1700	15805	12380747	580476	13537839	887	52805	855585	16795580	2440333	164009	705	2204	1012756	4183164	1432557	26884	973012	127796	751260	483393	1257588	2513676	54977	59626	460825	1081973	8679	892945	541711	91366	426386	11056886	28771	4464	2498094	2885592	1117972	5938159	579286	1565002	296068	610065
HIRAE-j3-exp1-colon_270	128	544692	31464	4388	4824750	4732	2373	26359	3111049	139987	8675843	12	7324	141809	20723685	105954	284	1420	2577	455736	477425	451783	180961	1671293	38891	1475649	219900	2621898	4354	1578	11197	615912	1081933	81	832780	17563	121665	173849	6874795	68982	690	4893948	393694	438475	316711	893395	438554	2963890	66270
MITSUAKI-j7-exp2-colon_245	737278	391786	75803	13697	1798489	112476	479	29904	754122	21263	4953276	17115	125064	74053	14396827	2901	1462508	1772	5104	595773	29836	1280954	20125	1280636	117535	726900	982736	3598124	13409677	235202	37239	427831	1053800	70554	1395877	8591233	114387	80008	4773349	19627	3969235	6862395	57068	137720	287032	483744	451340	60990	2617015
Nacl-j3-exp2-colon_203	832309	248108	32034	9700	5183550	8963	348	6779	690023	251739	6575643	27031	41825	82793	32167374	287502	1034366	517	1464	835684	898941	268504	105188	1277142	79869	927055	447401	2698865	2492702	131453	50209	490970	1078483	276710	331040	9061759	75359	335282	1146532	96830	232889	5230535	615927	196217	1606522	454874	333600	4006192	2832964
FRAGILIS-j14-exp1-colon_326	104677	1574860	98344	19176	2244419	7801	864	22535	767079	38172	6637673	2396	347063	260744	49449252	2525	1247040	1386	3899	1386082	17593	1305437	79770	1952848	157140	1529211	864165	3627449	3982971	3407569	48138	694514	1212985	62854	975269	896896	48490	482528	4534596	75788	1895436	6651438	22923	143612	375024	533878	258095	25584	363517
ATB-j3-exp2-colon_207	36	170921	9136	11765	4896916	10129	303	7983	1904091	144766	3462288	10	3556	38335	9825203	505753	237	772	820	1905831	1150684	305974	173837	619682	37391	841608	162595	1681969	1270	1347	7735	502013	1060005	172	512538	1867	126033	117823	4886486	59922	878	3316855	102575	492984	19018368	298384	239669	7487723	797326
BARNECIELA-j3-exp1-colon_278	21512	4748881	78041	14220	4779940	6656	6230	60418	1924733	228031	12907375	1126	90819	161068	25431622	108562	22325	1705	4126	200223	50341	927426	20209	1312894	76556	1614681	406025	1858133	97535	34664	23982	571100	996823	1554	1271555	356224	76967	612700	9481590	72231	969	3409026	799049	744304	1031033	1146180	940534	30936	294040
MITSUAKI-j14-exp2-colon_261	71228	190694	117816	111419	2799116	8247	738	29381	675424	118674	9538324	961	209066	109696	15961781	1944	1427214	1452	1138	515415	25260	673421	78683	2605482	134387	738203	548479	3317350	2735768	1292462	2450	460937	1069613	77995	915523	507410	42340	142498	4003877	20133	3481298	6461840	19052	68795	201927	235030	197781	37123	229239
MITSUAKI-j3-exp2-colon_219	28739	386631	770685	188277	3655789	8722	687	17847	7469026	206694	9005517	598	44107	128243	17902498	504780	172451	1239	1295	668181	2189801	780268	19308	1021673	73214	934984	324645	1696732	1901304	58740	24138	484204	1080975	17008	769598	552780	100171	243269	8687889	16651	32627	3252922	827523	558831	3474183	714717	1053132	13147141	370119
FRAGILIS-j7-exp1-colon_304	53294	678414	80263	6055	3115033	7357	487	16242	647033	15159	2946684	1721	173433	216442	18623231	3592	1143590	1118	12430	1789977	33380	1255167	26490	272610	124303	1291069	812043	1586572	7391579	547843	22167	634589	1155070	11431	975846	820762	53875	68995	1223406	43071	5532090	2951541	490169	186988	260777	662229	1059498	53277	394069
ATB-j7-exp2-colon_230	185	149790	12684	11343	5179706	17851	626	13648	2616445	141438	5237804	11	4000	56315	9156731	404427	4277	616	1345	7560340	1453686	214025	221251	1147225	84141	1133602	234992	1303649	15746	7513	4818	516126	1168794	277	482794	7648	59316	180328	2861566	83165	23536	2532194	117531	699804	22894568	559717	360433	10487120	807452
BURKO-j7-exp2-colon_237	12241	734506	46249	18192	1975147	11154	1761	18805	328427	49182	2762308	2036	210456	54253	7852276	2554	133931	714	1646	888037	20342	337855	55154	749820	120475	871491	737663	3371538	943637	1310296	47275	504297	1148645	40011	602811	725762	26235	98327	5301894	20349	96493	6678997	41777	189190	292141	241627	595063	36484	357815
BARNECIELA-j7-exp1-colon_312	93554	601362	177527	12358	5189015	7915	1051	17539	1832915	67540	6925056	11129	317674	284126	24460673	1020	2109380	927	3718	912544	31025	269454	115741	1450650	145193	1210179	1788551	1717393	5147519	2996426	38303	698049	1302101	47000	677740	1926593	14199	432762	4823740	49849	674503	3117133	28139	120389	377780	537314	964206	55008	245506
BURKO-j7-exp2-colon_236	10002	1440884	240849	23381	2190824	8114	1709	12288	403784	50062	4435308	670	148444	75678	12441135	58603	160512	997	1728	871591	19647	538295	45441	2193374	103500	789403	912385	3287921	570316	974820	46211	495671	1132757	14509	599597	364961	13547	150029	3023087	23869	734690	6430340	20047	76980	231421	237415	575916	51966	184346
ATB-j7-exp2-colon_231	273	165189	14471	13733	4812641	13730	909	11871	2625453	141654	4804322	21	4101	46646	10391424	544712	5591	733	929	16654304	1678869	240374	252085	1074141	57999	1036142	233937	1842721	17584	4444	3586	520870	1187833	361	471135	6056	94623	144916	3469130	95741	13087	3652505	122708	725027	19211180	476716	345678	11300839	701208
Nacl-j7-exp1-colon_284	250587	977788	207519	6893	2213227	6228	1104	17200	848268	32232	3761221	5787	246977	265819	14730159	3529	1371321	754	5168	592994	41468	1381658	16117	893876	117862	1375006	939942	3809989	2462511	913265	18197	624646	1077411	134337	941359	1843927	27865	301942	1743282	64589	2481042	6993668	41724	118641	294241	507001	397146	30486	436905
Nacl-j7-exp2-colon_224	28157	3571467	103227	4459	2585028	8010	345	9399	1042449	19670	2160171	930	189396	293757	23030138	2745	825157	1143	1886	2208966	36039	877590	21063	604086	114724	1094623	1022043	4422591	2136333	726859	80328	601285	1236613	147674	812385	458781	10926	534113	1034066	16506	1977039	8523770	97024	86626	513002	190192	714163	27521	610453
MITSUAKI-j14-exp2-colon_262	34925	325684	49612	23224	3673235	6955	391	21328	558756	35144	2966957	2064	141356	51999	9346444	3418	713072	1334	1760	889807	20759	1359343	25239	1017748	135284	764865	306135	2928229	1914919	846964	51297	467507	1096980	95778	1081105	876528	76564	57449	9897214	15017	4192930	5801362	16812	120251	160678	204217	157040	19805	433566
BARNECIELA-j14-exp1-colon_334	172005	945058	196767	24653	2892435	8964	315	18640	1125425	4787552	5821695	5782	275680	320818	17081221	2527	422252	1410	7715	713782	34304	3026999	40511	1057330	185798	1401906	1315642	1140098	848151	1874098	35256	658136	1201316	153290	1038017	1463843	65583	243465	8993323	74480	4040	2044184	23521	282816	342843	485555	334022	28115	750325
ATB-j7-exp2-colon_233	760	173404	23174	10832	4874005	14128	547	21644	2185904	153600	6072310	206	3903	65646	15880434	424791	9647	1227	1323	80615465	1489334	312880	144680	1384687	77190	1174693	226373	1717004	102705	1323	5446	519070	1219631	2308	980925	28291	189393	110981	3934908	150912	958	3417512	148244	1057168	60891951	615659	308806	10361216	3769425
BURKO-j14-exp2-colon_256	105923	251401	132571	31994	1903523	8859	880	28411	616212	226251	7625656	861	86416	104884	5922974	547138	277374	1859	2184	725240	21799	5025366	29531	628636	100482	732299	950125	3927765	3796475	243798	28640	464177	1047768	34240	1435090	1379357	143730	150103	6009656	48813	1064	7769786	20331	472957	202533	236529	636984	20376	752000
BURKO-j3-exp2-colon_212	3942	759531	4632602	36452	2733568	11997	2092	20906	8288726	235119	15475224	66	41092	206532	16193680	580059	28553	639	2976	314999	2389178	948259	25780	767937	132692	899375	402145	4024367	458951	7929	20605	458409	1115501	7297	889763	50537	123426	216944	5914932	75337	2566	7946808	1440922	864692	3922391	870018	1330231	122379	316350
ATB-j14-exp2-colon_250	32	201260	21132	17987	5047159	17156	1640	17704	2902648	225041	6107386	60	4034	54929	15834142	893987	255	874	1023	6821161	2020486	382415	266915	1512671	69013	765966	240346	1576029	1509	1468	2644	424231	1032737	50	819624	836	214802	215430	5296858	89620	660	3123266	186406	810972	26293234	513751	384736	11535694	1174600
ATB-j3-exp1-colon_264	832	248297	36134	5830	4693605	7779	2876	12454	2797661	165124	6467066	360	7490	113920	12567261	289764	16387	756	4368	20896159	1362276	515651	211028	887131	80785	1605031	249102	1187197	70896	21347	5682	632886	1132681	1196	489543	29390	55328	240225	4847664	230305	17842	2167172	144505	1003715	58354427	996306	340236	11810884	1232111
Nacl-j3-exp2-colon_202	117116	355508	68660	2181	3306503	5408	280	3259	351562	9909	1617256	4335	112220	148517	10212135	3144	1045644	903	1285	947826	25008	492451	11393	203034	41144	995853	289749	2960183	2254820	382353	13132	484446	1074716	83594	432281	2094056	18353	125577	553101	10770	832362	5806977	23264	73067	229289	170314	156498	23333	363246
Nacl-j7-exp2-colon_225	140296	1438506	131670	4641	3634072	4743	303	6601	589124	17101	1540907	3719	79439	80564	17562317	3018	1218640	594	1191	2221866	18947	758356	16396	420050	45787	1068927	352976	2920950	2317930	546803	14113	546548	1150192	138223	581021	1524411	28678	174835	960178	11604	1583555	5775460	45824	61232	573374	181846	212495	19822	859909
HIRAE-j14-exp1-colon_322	204392	716610	54991	4357	3366802	4491	584	10582	591079	172327	2773474	3127	148478	196792	15103271	157169	958140	667	5257	850969	18448	690715	24281	383432	106392	1279585	691165	1423014	3979139	812894	27280	585893	1133326	57053	556322	1397871	28003	115251	1910577	106881	14786	2612564	22105	237181	280195	542905	705387	14031	365322
MITSUAKI-j3-exp2-colon_218	3328	246209	841460	240625	4219613	7438	240	12537	4542242	306499	6510581	34	25274	115534	10879928	764156	5873	514	1532	194604	1661320	420904	11529	566136	37429	1036079	162513	2524048	108984	4211	11496	535670	1173956	1406	521995	24950	119966	110809	4877722	14691	1235	4957838	1044709	542896	3528569	543597	634406	9655167	224032
ATB-j3-exp2-colon_206	646	153736	10524	20414	4875342	22770	1216	13063	1699470	298436	4688787	454	5277	63196	10861134	1588571	31470	917	1128	45816451	2499496	646277	228099	752336	68537	911858	137095	1672446	213247	5367	5658	466609	1091646	5275	672693	112950	93681	172874	5284810	199888	6336	3329043	210077	1194033	58173937	340011	196888	16370401	1219965
BURKO-j7-exp2-colon_240	44726	1388419	130358	43626	3476071	12240	1975	23164	911474	56149	5561124	6222	174555	100084	29179762	51658	643373	1481	2443	1126627	36166	1524735	69388	3004245	179666	767071	4382932	2036953	3722468	833835	27639	465557	1127337	28493	1042483	1919234	40254	390616	9101834	269036	1496619	3945989	66769	240299	551749	428633	1141745	32855	790237
BURKO-j14-exp2-colon_255	98394	275091	153545	78089	4216047	9488	506	34487	649323	411256	12515473	1008	106738	114938	10045298	1757567	272615	1587	1686	1500353	20921	2854806	47625	791366	107173	723215	2007525	2068595	2912234	217851	13731	464107	1010920	55410	1115022	1166049	161189	211549	9942578	60881	644	4008168	23506	376564	228292	377778	948750	20071	473630
ATB-j14-exp2-colon_248	38	130196	6920	3293	5627229	9072	263	5615	1486311	96901	3110159	1	3637	42073	7369363	266364	306	427	1128	5723696	1241721	184249	103802	567347	49241	707910	116424	1598218	3607	2527	6247	437441	1097038	38	398743	1900	32055	89120	2186202	65787	1466	3114124	102686	564699	25279695	305053	227050	9934211	424009
Nacl-j3-exp3-colon_201	35480	376243	57307	13950	1499023	4023	978	11103	329391	14238	1954354	2238	185885	583038	7332190	1979	1599884	1491	1903	5205579	24048	3183358	33176	220691	180928	846180	375882	2865340	3015191	1008842	11981	615938	1066902	93404	1442894	539141	46650	61870	1480916	24510	3157522	4984654	16974	168739	465165	289709	149434	19883	1918494
FECES-j3-exp3-colon_214	2044	369302	15232632	66945	1358564	36752	1263	38464	4049270	293342	9634465	12	31401	142735	5874960	666341	27427	862	1530	2420547	2699522	787091	29342	319303	192430	1333926	319295	3373327	518656	2523	52686	670453	1319397	3668	732121	10657	128457	127821	3511310	84436	1084	6508143	1022887	1328550	778914	583196	937859	17530118	391333
MITSUAKI-j7-exp2-colon_242	383958	274019	199703	83363	2441826	10654	2971	30891	1130169	63586	6981161	1761	183757	247702	21206753	2163	3435918	1410	7891	1498394	48602	2938242	55252	871575	141241	800936	1728126	1903724	10668412	1463294	16677	511784	1135224	75441	1035260	830169	30009	193825	7562960	26924	5262462	3676495	34646	258757	612744	383792	1419138	85311	1092488
ATB-j14-exp2-colon_249	382	207799	26813	20680	5237623	13240	1705	52977	4950031	322655	9839274	22	3732	81865	24820855	1054899	1918	1443	1167	9538440	1787417	645565	470611	2457246	78581	765674	415452	1853613	10867	3041	4345	441375	1084108	52	1469094	4723	760874	303158	10077590	102597	4224	3551897	219336	858733	20473287	1032107	561405	11844547	872553
AKKERMANSIA-j14-exp3-colon_261	87772	785354	49851	5959	2350584	6232	521	9804	321257	8810	1184021	2517	207510	233740	9714424	2482	562400	867	983	2174587	16559	1797895	15214	290079	110600	920606	290339	2389685	1793615	1371563	10681	515552	1073096	138954	828065	1310338	43435	75267	1461619	12243	1968222	4682898	13600	136593	340272	171755	231084	16623	685663
BURKO-j14-exp2-colon_254	30230	325226	287073	187104	3998005	12621	263	42343	1242275	411452	17718347	410	157480	129510	10609029	1506975	72256	1070	30720	793189	25219	685817	53954	1175526	146413	1017813	1499711	3209827	1216445	400812	49220	488883	1065952	21412	775938	520567	109588	158664	6917127	145590	1609	6332085	28666	947292	335560	799386	1339759	33498	791510
Nacl-j7-exp3-colon_225	5516	505300	57539	7959	1976713	3970	1463	11589	364907	25311	1720859	550	194091	432409	10021403	4009	538983	1610	1558	2819445	23499	2889719	22218	280644	192385	1247049	340563	3505063	1025551	842622	9006	730165	1191596	147155	1357680	99596	56353	91995	2328080	19829	2836195	6711610	23211	145278	720945	207226	150173	31239	1786154
MITSUAKI-j14-exp2-colon_260	4753	194794	135439	87984	4015876	7609	738	35910	920875	119849	7687409	461	185942	95522	14469560	4602	290033	1137	1539	419812	16216	798802	54125	2406559	134991	784471	545541	2985801	783968	1205534	34368	497094	1086676	33020	728721	109690	46985	125172	4183429	17325	1820840	5855305	15759	82466	128885	244481	225025	18651	170831
ATB-j3-exp3-colon_207	49	261688	72094	7254	4384715	15524	696	47155	3075613	173552	6808806	23	5082	72827	29463686	518124	109	1985	649	4822660	1706130	1566540	221724	2179816	44279	1166424	316108	2293862	538	2686	5670	612900	1261567	134	1763521	573	760614	141834	21018943	64130	817	4360943	163807	318806	24253131	868778	420065	17700628	491193
ATB-j3-exp2-colon_209	97	178120	12423	11575	5193007	13542	1216	15178	3348250	177983	6527814	74	3916	71884	9707118	561676	694	1008	1749	10701466	2122263	372910	252697	1165813	103895	1044772	249000	1846031	6167	1782	5081	596969	1392630	100	629167	8322	83932	193853	5013139	147234	757	3616306	167580	937086	35441643	568076	430901	15159435	2115241
FECES-j7-exp3-colon_238	138880	1334322	6739311	96251	2812047	18398	859	57201	1725204	95271	21828296	889	151444	172157	18124438	24395	441323	1450	1384	2607495	95162	3080469	45482	1010992	207404	896372	1323763	1928079	3788119	41656	17907	469992	1006266	25139	1648364	447244	168935	332190	18115506	38440	551	3776292	2658887	740917	1250291	1114755	1368285	74134	3030963
BURKO-j7-exp2-colon_235	13061	762819	120379	14833	2782165	7662	862	18928	455262	51475	4316920	931	93660	68227	34283774	6439	288897	783	2169	811624	27660	1001292	46454	1309530	104456	938447	934819	2098181	1075574	548220	69292	522083	1150083	19963	837466	374126	36637	340373	5489638	21238	1691349	4068192	27869	116777	155376	295171	739884	35741	360630
AKKERMANSIA-j3-exp3-colon_220	4307	340907	6141149	62396	2901491	10424	833	24742	5484111	234472	13145645	62	54996	247564	12204106	541905	67181	646	1377	3506526	2244739	765574	30626	1242814	43256	1036010	262842	1608432	980958	1522	11584	654880	1133123	8355	620513	54767	376737	140689	6282833	125218	275	3074832	1221847	401004	4253091	1115383	739177	21693967	372191
ATB-j7-exp2-colon_234	46	149046	8731	5243	5015972	6736	161	13507	1739605	108532	3515803	49	3208	48851	10393836	339042	398	594	1234	7333480	1250623	463855	84277	521437	47716	1256648	124243	2329369	2519	1363	4433	572177	1230627	20	658123	2750	84166	68220	3873849	88074	1562	4489888	92941	674351	22411008	382250	246902	7832916	275797
ATB-j14-exp3-colon_248	21	180544	35901	9557	3525311	13160	2516	10345	5424103	165166	7832678	34	5783	39057	13294881	565090	121	563	1073	6030942	2038752	176949	1227008	1813555	95867	853695	397263	1745407	1039	1034	4897	482470	1089122	45	443379	614	747770	545634	2791192	84488	377	3386032	162255	644476	33760746	762915	583598	18562502	1218404
Nacl-j7-exp2-colon_223	68297	414911	66442	3539	996332	8520	130	6220	303763	11679	1868450	1847	218124	101368	4670423	1811	944786	720	2882	2912406	31000	262255	19643	199414	150126	924487	485689	4567584	1303346	767124	12148	513461	1107500	49756	710341	790512	9035	133918	57838	14143	1863954	8955708	25315	126496	260954	189011	528296	25827	482270
FECES-j14-exp3-colon_257	17477	1235564	192211	12090	3700502	5078	568	33002	933000	29096	3134191	903	193541	602859	22115940	6781	254957	1685	1393	3707440	53805	2860327	46412	610916	127590	815100	568297	1948473	659076	593901	68611	498656	1052503	73856	1413968	283956	113830	213636	7232562	16935	1015202	3692661	67531	233525	457449	467944	361930	37977	1011224
BURKO-j3-exp2-colon_211	27159	454792	6132727	78085	3899545	20397	4346	19607	10859080	416951	14831737	608	51273	697621	15413670	955404	65781	1451	3285	2049757	893184	883700	27512	2123686	125045	956324	596817	2324171	1404651	241296	33823	510804	1192104	9810	917148	369376	74920	328706	6223413	81681	127523	4484771	2908257	392721	1072782	1309760	1826510	82205	520991
Nacl-j3-exp2-colon_199	142643	602376	153812	11774	2101218	6412	491	25423	818966	33117	4378104	5369	127054	431244	19458627	4930	1611402	1091	1526	1306928	16255	939685	21506	923371	46645	997545	537762	6355414	2650500	842982	19352	564685	1168516	54579	891779	1265093	132548	135408	2685177	18891	2326047	12516170	36543	62441	273488	363273	273878	32420	524964
Nacl-j3-exp3-colon_203	16188	1084901	121676	5179	2388961	5941	81	15913	1116908	20965	1885847	1033	280897	404612	19036272	5594	423088	1353	1250	8146348	37685	2876874	22442	240774	67134	1057577	480625	3850441	983218	1229818	41960	655376	1278998	15424	1047828	231339	51805	156146	2512152	14256	1600919	7253171	28106	145219	538457	314625	232231	57343	1448522
ATB-j3-exp2-colon_205	166	116536	21950	8176	5159912	10681	582	11354	2652011	134834	4298618	9	4518	48343	9648643	407502	1706	499	1466	4339355	1381515	219731	199742	643274	33942	972513	197450	1880579	17490	3332	3033	514443	1109706	62	348928	5778	64647	147002	4605774	100016	1346	3668972	134376	548477	16434077	403300	312449	9516378	394229
AKKERMANSIA-j7-exp3-colon_241	43507	432540	1888184	103503	2158527	9767	622	54500	3869760	91955	16797437	445	161839	80459	20836694	27316	288070	1345	1682	1844854	40578	1361650	33334	787069	157778	932397	2564378	2669601	3499941	158129	55646	517899	1125423	30892	1209553	654407	116478	153367	10636355	19108	2507	5077666	29924	525654	581955	719059	992291	42769	1067283
MITSUAKI-j3-exp2-colon_217	38169	399509	235406	84702	3950748	7406	754	14813	7812666	387198	7410430	564	41625	96450	25893145	1292011	265094	898	2645	917579	2779951	1761038	13074	356486	61226	1227531	274037	2347577	3365073	7311	12780	490120	1045989	29048	596746	537021	38326	287934	7080385	19637	1051	4621404	1645483	736594	4602554	339527	838715	13755219	922317
FECES-j7-exp3-colon_235	33056	1316322	4189388	62558	3163552	10175	705	24784	1040937	53674	14459973	417	120536	88644	10662246	24032	152343	581	1652	2126327	65938	1295481	26668	679759	168948	1058292	785827	2952688	1876960	34496	35545	646237	1245527	17468	861235	136861	106121	169788	6848998	38823	1780	5658937	1765410	617085	929196	389817	879635	123184	1113058
ATB-j3-exp3-colon_206	38	184181	39081	14375	3546092	23003	2348	28908	4232346	178166	9007213	4	4829	55095	17203028	493277	205	1074	1037	4577976	2201431	902851	707629	1893274	127181	1197041	377810	2061425	1876	2798	2175	676538	1397481	32	1197440	731	243436	405430	7833313	122517	277	3954264	163241	751023	24487927	1011805	565449	23738820	1011595
ATB-j7-exp2-colon_229	87	135038	16194	16521	4546296	14465	1569	10508	2164825	201451	5767371	4	4106	56243	10453150	695645	906	427	1556	21214457	2011567	298722	160607	1085224	67555	938561	150025	1907046	6307	1265	4240	488731	1150690	60	529502	5465	156421	158293	3247933	134603	1045	3704932	157699	899854	29266455	523316	241532	13691224	1494350
AKKERMANSIA-j14-exp3-colon_263	49208	1359521	103042	11087	1944020	6662	366	13280	858278	15769	2402739	2487	359465	348474	14920544	7415	284521	979	2915	3843036	21877	696571	46189	476587	140177	1062738	852271	2219497	800911	1742406	61767	548471	1122896	67868	655645	666197	27873	226476	607545	32115	492506	4284870	25345	305104	517306	315548	444011	46045	1046463
BURKO-j14-exp2-colon_253	402453	509651	204102	337920	4779041	22985	4252	17675	3456079	372327	11200815	2011	379359	100746	245491566	1094364	200622	1494	3180	69944965	186339	8490057	289476	576207	201057	962239	2014238	1323720	3015882	159933	11778	712341	1112851	37853	1060619	193163	88462	643341	5980899	310698	190	2634593	218831	13372730	377619	1524090	3441136	86348	1552474
Nacl-j7-exp3-colon_224	10126	184386	46080	5512	1671038	6587	322	7259	370963	19144	1519332	947	253733	326989	6408198	2731	300744	993	2225	1235252	19039	1853964	11373	416933	118103	1367398	215354	4627317	455720	1010038	44949	783449	1320939	84814	1161270	169751	19395	116803	681683	16843	2724870	8781050	14974	123844	296443	227700	188835	16604	480748
Nacl-j3-exp2-colon_204	62713	694295	70178	4004	4210238	6207	226	9319	608517	26949	2507996	1931	128021	183968	12738087	3821	731227	1028	1785	1394211	14282	1167650	17318	593670	71234	866131	418148	2273835	1525160	663171	17337	530943	1180310	57273	857904	553288	70368	159811	1895748	16535	2249631	4464043	17033	92941	172561	301712	181712	19285	204984
FECES-j3-exp3-colon_212	1230	536740	6401462	68339	3805242	11999	1500	67100	3925670	206136	11545424	110	34629	167360	16497433	410923	91842	1351	1543	1370955	1993292	1229424	32145	621515	171138	1388647	477272	2153362	1450302	4189	9282	722344	1364753	10384	1190203	35689	218166	228304	6968472	43648	3412	4166724	1071712	1069407	1113222	1267513	1118127	15072555	366194
ATB-j14-exp2-colon_252	173	120192	7844	2873	5151672	13420	140	4859	1261016	101456	2526493	4	4005	37508	5156078	266379	788	487	816	6427717	1176675	248217	60992	494832	32996	718032	84167	1386250	5894	2362	2275	452995	1070352	17	374810	2651	29009	53158	2098884	80409	1636	2744842	111200	601383	23202893	267815	182783	7386532	367107
AKKERMANSIA-j3-exp3-colon_218	2004	298949	10586914	75989	3183246	22232	797	37427	6777525	356201	19311970	135	28885	305184	17727407	854739	73822	1037	1713	3747969	3300128	1297158	33441	1161048	129456	1066033	326804	1963924	1445588	1486	47903	654624	1183585	6997	822864	12037	735160	140370	7328913	121753	425	3807343	1401526	1228927	5350384	827563	1131073	26893128	394152
MITSUAKI-j14-exp2-colon_259	30243	263757	120222	131739	3859536	5138	1368	21487	1117072	45517	4514604	889	90973	93941	6305100	915	899862	924	2782	1668376	22255	1671298	27418	440611	106604	774363	400332	2061285	2221212	903703	76501	573591	1107918	109808	957587	248505	37978	70598	9697873	22438	4941504	4041001	19658	152113	173439	166167	199041	23883	407516
ATB-j7-exp3-colon_231	25	333355	120608	9949	5144124	11224	792	71793	3829214	217388	11054564	7	4880	74841	34272877	460357	142	2082	830	6300647	1879206	1535964	292182	3156171	85205	1405244	386338	958699	659	1518	6636	619141	1203058	64	2165135	806	902087	184583	22667525	76348	525	1914629	150866	634135	30074130	1222249	541596	22074352	897852
ATB-j7-exp3-colon_230	840	169672	21666	14358	4501442	17038	2830	15597	6146985	232702	9890800	28	7656	58451	20939913	863782	8968	522	1387	5664780	3198868	569902	1472237	2365405	146345	1555062	443609	1091726	22861	10179	8248	717687	1342679	688	803344	12527	160081	667568	7231040	108376	11837	2006386	280844	917075	28922693	889415	702605	24778256	3039611
MITSUAKI-j3-exp2-colon_221	19312	438074	650115	135656	3389570	9960	322	26483	7008402	301199	12984628	630	45568	179276	28706370	697473	58771	1206	3115	766562	2479257	1762268	16540	1435852	122188	960673	359341	2205942	1655343	22238	22433	680545	1223978	12268	1164894	554297	360114	352889	8899123	27313	7660	4250366	1040733	883570	4905541	1010945	1069292	14990213	642512
Nacl-j3-exp3-colon_202	13821	328930	243379	107010	727606	5687	1891	25456	716447	53283	6835648	1344	277046	110248	13390843	2854	452248	1313	2150	3229645	41563	2680645	31510	412605	95340	948096	1199147	4910644	720125	3819376	2155	667366	1177986	86243	1055445	101404	72658	180394	1693004	31042	2804420	8351855	32778	131980	1140803	286161	281825	39319	2718731
BURKO-j14-exp2-colon_258	60101	432795	147447	69272	5002161	10307	893	25660	741437	500214	10774661	309	171145	107263	11690642	1632140	195474	714	5562	1146168	19373	881026	28764	718347	125864	925238	1100178	1904691	2608458	318684	12331	494465	1125174	74978	669515	1441911	63811	175838	5923200	99733	6278	3717613	27563	527757	186123	466575	1081870	19610	955591
AKKERMANSIA-j14-exp3-colon_259	14145	601867	65398	8304	594786	8785	277	7910	348797	15627	1927988	1034	316443	372894	4136317	1629	330822	660	2281	7240764	23213	866982	15055	254652	98651	977606	352406	5144167	1125903	1945766	12892	575033	1149114	27010	604140	451365	11047	67803	412601	15465	1429996	9645847	14095	172844	495726	192560	113081	64825	983580
MITSUAKI-j7-exp2-colon_246	685422	198945	59473	68001	2647147	45611	494	14641	733746	32562	6219100	13529	123839	110110	16435277	3763	1534157	931	2856	844212	39148	633240	30969	1077735	104446	803158	1481672	2497302	11349634	762590	41347	488341	1101559	51685	839753	4400290	27281	84313	4223666	22568	5167976	4873696	25023	206494	373411	388500	747404	78404	678026
BURKO-j7-exp2-colon_239	19501	3509026	141630	23134	4153237	10724	2203	13194	587273	81829	4593448	644	193926	72741	19502141	208483	204494	951	3843	1012749	31527	589176	42412	1224389	131261	893277	1919812	3417199	1670435	825468	39576	524275	1197428	12996	694017	477342	22958	244502	4553009	109450	977908	6598663	17648	195306	265514	346906	938285	44758	516919
ATB-j3-exp3-colon_209	95	155398	56058	19057	3860150	15250	1754	13151	4125946	380331	7957462	14	4442	58424	19352407	1560875	929	559	1308	5780957	3066238	198649	969865	1687880	73911	1378988	365196	1612131	4425	2341	3631	663081	1286500	94	410360	1457	90958	576727	4870851	103823	1925	3111564	293949	1032980	23618432	985373	529131	25782702	1424990
Nacl-j7-exp2-colon_228	72630	354433	98304	6799	3265271	7166	325	10364	866362	40843	3009581	1632	199390	658585	16672419	2939	1828006	848	3698	1626045	27091	1626269	25389	744096	82384	1008865	558359	2484929	2939929	1096058	13508	581262	1218402	119692	913150	789240	16204	397830	938019	25874	4615602	4715013	23365	86275	422484	253459	416303	18556	508060
FECES-j7-exp3-colon_239	83237	753538	9202171	73002	3326275	15371	752	57119	2942946	97026	19765943	1159	234706	153025	17564134	54943	317948	969	1459	1511832	107875	1178736	40302	919414	157297	1019425	1356793	1244719	3105182	33616	19355	537488	1122036	15622	1211972	395398	180678	263174	14135031	29978	1717	2420067	2174646	638429	1169320	974728	1344899	138422	4038451
MITSUAKI-j7-exp2-colon_241	379598	162233	86473	40885	2754991	8482	1473	19617	2205250	46686	5375720	2685	86097	92817	14055257	4885	1946082	1139	3962	979628	38572	1471603	26990	844194	153547	822953	1269183	1927770	9208378	365623	51688	482790	1136873	52676	1019641	591076	93933	75141	8318222	27532	4479794	3635536	29723	236471	283127	583714	1048742	57953	570482
AKKERMANSIA-j7-exp3-colon_244	22431	430519	1408792	60583	3265732	7841	398	34694	3484739	118258	12324194	418	180206	76795	26462245	200448	219926	1285	1677	1438596	47378	1750240	21096	697393	137618	1017007	2242441	2588968	3100921	175913	89797	522289	1081820	25433	1107465	432308	103011	184110	8276642	63523	380	4983601	29245	430226	1391176	669974	857940	166427	987884
ATB-j14-exp2-colon_247	1000	126185	13354	11206	5531443	16156	1032	20249	2540161	136182	6793621	19	4054	73383	14173093	329453	9173	942	1525	5841934	1676875	203775	210027	1562402	74254	820988	274003	1537023	16693	4378	4080	479745	1184120	359	780835	9004	187681	218142	3755103	105285	15353	2951145	123068	711715	27525292	717469	360556	13224209	1036497
ATB-j14-exp3-colon_251	71	131435	15328	49565	4166391	13420	1420	12569	2616838	232799	5826049	45	4582	45591	10483627	847389	273	483	1246	5831502	2113745	181345	236155	1133583	97095	1027742	232795	1872739	1442	1489	7160	525500	1138095	43	588733	690	79437	139547	3539995	59912	591	3668418	138747	949498	27586049	903581	384235	20538693	1125724
BURKO-j3-exp2-colon_215	33885	1095783	504845	18264	3441158	10938	459	11525	785422	41997	5587926	1375	114659	999309	15971523	4065	408564	565	2030	1954201	143284	417767	17544	1160959	109041	918394	494357	1641598	4475598	484724	50468	508092	1029273	2723	545244	705820	34319	479825	5165813	36549	1626662	3245098	26694	126350	1025791	533785	1012057	59675	3090308
Nacl-j7-exp3-colon_226	2051	171170	130504	16743	2294865	5698	939	14164	946235	50397	3951757	1193	268698	1198623	14889134	4762	485150	1466	1972	1849087	30554	1499500	26526	890092	109883	1424526	499213	3989268	721270	1781425	36262	793127	1333221	54511	1148284	36068	71013	209914	2382889	53992	3521353	7529777	27554	102084	452550	320339	404368	43666	911251
MITSUAKI-j14-exp2-colon_264	24776	1905348	78774	19608	3508803	7906	356	12279	661222	44497	3424033	1992	228529	94968	10907590	5325	421463	616	2606	887454	34234	409270	20215	934278	76716	829294	387747	3164963	1240870	1643559	12542	513448	1152363	26834	475311	348427	14343	119830	4066901	18487	1956373	6030500	20927	59546	314911	180291	173119	104358	315501
FECES-j14-exp3-colon_256	45142	2528116	109712	5011	1089289	8595	233	6212	402246	23969	1770596	1721	311637	390668	6968416	1652	1041216	832	1900	2545792	30230	871940	13745	419873	68766	905018	503617	3964377	2550571	1294372	2733	568694	1128285	49433	593262	523543	8283	184316	576827	15770	2345350	7538948	17431	111087	252843	217772	201924	30673	431984
ATB-j7-exp3-colon_233	52	119627	11260	7209	5005440	10632	553	10280	2080227	378953	4412616	15	1003	48308	9702429	1446479	499	912	1135	6276762	2489866	335344	126122	570960	56601	1724049	125599	1578638	2461	904	2525	726042	1378911	72	460879	985	52178	215498	4043238	110883	1914	3096208	186322	1049344	33853474	430792	236219	22026826	359308
AKKERMANSIA-j3-exp3-colon_217	596	335196	3739524	125131	2180975	14085	1848	62370	7318994	592651	22589064	30	31457	358985	18994487	1533117	83618	1799	2290	2486525	4971790	2652060	26141	3311142	142559	1323487	535261	4234387	1292619	37626	15541	695767	1222263	17325	1648327	25868	1295169	174427	9673990	434033	12249	8212620	1513969	1969609	7140723	2933632	881639	27790258	666145
FECES-j7-exp3-colon_236	82192	1631012	13229112	88262	4256804	31627	1287	83414	2434936	151977	27864253	1473	155695	236268	35147045	64705	238928	1679	3121	2566505	187505	3162306	88728	1509896	135468	1118376	1545146	1103273	2217764	35308	11374	640798	1192398	28377	1594562	538940	229752	527377	15504191	33743	452	2092586	5906131	896412	2258107	1044652	1777512	201411	1672884
Nacl-j3-exp3-colon_204	109253	226155	92709	14254	2267567	7288	1249	10772	370457	27528	2687533	3732	217149	651588	8459242	3919	889218	1360	1657	941836	27279	1776248	11808	633003	102521	1188069	465438	3587985	1611651	1214182	4837	631871	1283604	36733	1187799	872430	23094	140705	1294180	19409	2879115	6869245	16238	100751	313712	318597	239500	61165	441926
AKKERMANSIA-j14-exp3-colon_262	114075	352337	138292	35323	2458957	8290	419	18312	473061	62745	4951681	2482	326054	773711	20211935	4843	1358479	1277	2032	2477446	29469	714443	32507	904073	176235	1088319	423145	2744782	2395085	2502228	28626	597324	1178198	55884	1040643	1022246	19421	382105	607573	29748	2747010	5229436	49688	161236	283782	317170	350834	74010	416715
ATB-j3-exp3-colon_205	219	209872	83344	15797	2806011	18926	3499	20229	4619812	233627	10395782	10	4495	70458	12053345	587905	1228	578	1763	4564009	2882734	373769	956499	1824834	84132	1385631	381717	1585503	10152	1892	31168	722696	1468894	73	570666	1463	158036	525462	4460832	149839	569	3065237	217496	950482	28103010	1129030	576266	28298854	931427
FECES-j14-exp3-colon_258	137501	383765	53072	3981	2498195	5275	531	7271	273615	14985	1833525	3713	264725	509857	17777920	2585	996856	655	1217	1137520	32616	878662	13877	280741	75926	1131918	340495	2568812	2693132	1066055	11552	602727	1144982	20739	604452	1206158	10581	187365	732649	21354	1752284	4913825	15815	102004	296733	298756	275263	89846	564345
Nacl-j3-exp3-colon_200	51825	431367	55518	5647	2331020	4866	474	5299	532212	13753	1609899	2746	343861	198913	6482203	2594	669303	390	2376	4218499	22103	342826	14690	239422	82593	1086109	425258	2740785	1646910	2411166	38041	657483	1219063	33551	477622	486915	12610	67248	77635	11785	1750059	5257436	15051	135392	326914	251016	132266	46070	858812
ATB-j14-exp3-colon_250	40	180400	14499	10968	4157295	15405	840	14398	4354301	195622	7195986	14	6071	55502	16617689	511466	281	489	1298	4629025	1916681	292168	450601	1481865	115664	943958	317464	2377131	1018	2923	2367	513996	1113997	76	659053	673	70299	429463	4659145	88939	861	4441907	140517	716302	27874720	667889	493606	19012615	829736
AKKERMANSIA-j3-exp3-colon_221	3950	181672	6349744	48950	3875450	15098	484	26336	3697027	326020	16026549	NA	37076	271612	18696322	972351	110750	866	1854	3622251	2728540	1063128	28529	974601	71498	1199685	201361	2281446	1696248	1998	47073	628366	1175629	5749	797070	19084	597234	88781	8030576	250160	538	4348710	1280266	1489312	3946237	977054	475901	23368615	186093
FECES-j7-exp3-colon_237	111803	402793	10550073	55713	1169988	10506	741	32641	908939	63448	17560500	1583	104573	99953	6620175	9573	486261	852	1527	1144032	82204	1112302	22342	386447	108208	1006874	780784	4411778	3491036	26117	11604	509429	1163563	25643	863214	491647	58285	122312	5928400	23048	441	8276652	2394283	616876	871443	544238	928292	111824	897810
ATB-j7-exp3-colon_232	55	155107	14581	8501	4697204	21582	1572	10691	3017167	126606	5397595	17	8635	53655	13524741	355698	2578	700	1459	3722008	1797814	312457	279347	826028	98062	1648731	245352	1687222	8354	22134	5054	737112	1443160	136	462335	1950	55142	279604	3333835	103125	8725	3270209	125128	694134	22438605	675820	406979	23157883	666927
FECES-j3-exp3-colon_215	725	141598	5233598	46744	11790842	19465	5217	41688	5068158	285842	12926869	34	20531	165487	1430377	356662	11678	1195	2020	1046695	1703683	1291291	20601	641188	201817	1426603	667686	8017796	278709	1960	34536	346972	1477947	915	1027944	3408	99693	103862	1339651	50602	612	8304373	593792	1107663	1446743	1195024	1144551	15868277	302075
AKKERMANSIA-j14-exp3-colon_260	130515	823214	3752216	75652	3014546	7597	305	33468	2712796	113585	19707525	3800	201484	302824	25807943	5159	466529	1462	2324	3479237	58380	1792911	27487	785553	151029	992905	1128007	1972646	3983589	223452	16435	588540	1138656	54955	1025586	1635529	202700	191050	3560048	317505	5423	3717052	95332	425721	1256636	453886	1222788	60582	1181729
Nacl-j7-exp3-colon_223	17157	707766	135778	13062	3121507	6627	591	12431	995151	21781	2609884	1102	363839	209984	21566824	4255	115218	1194	2282	7787899	39857	845158	27228	560867	94406	1525137	423325	2995880	313474	1469373	6122	770405	1332034	11876	942842	179242	64705	233635	1663968	17072	1130683	5581261	29877	209585	592280	408885	264084	118998	1104512
AKKERMANSIA-j7-exp3-colon_242	3349	222189	1045091	38138	8748975	7811	1894	36419	4782885	277023	11932923	70	131067	62510	1107435	448616	77844	1596	2742	695315	27281	2296380	12448	946998	218627	1081387	2203570	5509833	911221	125741	70218	234435	1191606	21059	1436218	125604	223934	89870	1702833	31011	1381	9501933	16840	620960	450093	701878	853185	73596	1180367
FECES-j3-exp3-colon_213	6251	356131	6623755	57110	4199162	14925	559	60504	5404411	278044	11379284	67	23517	214486	16125329	560249	66955	819	2264	1755938	2591461	1727566	29734	381444	118889	1411803	438089	1944228	1124362	4383	39155	782750	1417129	3317	1085933	39138	280527	133455	6798633	75995	519	3774260	901390	1279960	673241	1027188	1102612	16633408	303131
AKKERMANSIA-j7-exp3-colon_243	40401	369685	2255135	147669	735970	9448	1354	30673	3455004	85592	22855041	568	140520	86813	7722952	7605	365984	1148	2331	1065582	44484	2457739	13625	1021486	137016	983466	4455160	6449426	4378535	64629	20241	540982	1239884	39952	968187	762292	35371	118397	2761772	171948	143	12091701	31105	463280	525617	539523	800090	25048	984878
ATB-j3-exp3-colon_208	64	186017	40047	18076	4460586	23156	1527	27349	3249719	306292	7178197	6	5228	67607	18078200	1056754	788	696	1481	4411219	2137992	424616	220121	1539973	94794	1223504	323815	1522357	6876	3976	2677	623148	1281609	198	847888	2448	210164	240502	7625021	109839	762	2811164	203013	909721	22722503	931696	451977	20742945	655437
AKKERMANSIA-j14-exp3-colon_264	11028	911375	152835	14749	2334158	6689	935	13931	868741	37847	3281597	811	266652	551205	19081575	2174	510479	1097	2491	11611176	23527	1044765	30480	831287	97009	1085064	519002	3558933	1215208	1789318	35208	557658	1170525	21200	809684	346043	29766	314022	940932	27950	1507703	6800280	17812	239125	588834	357426	407533	33046	1195669
FECES-j7-exp3-colon_240	81171	650410	3162860	55688	2167240	10791	698	36466	1251751	76070	17389690	1170	155868	127718	15748065	21339	537401	1572	1855	1152989	83834	2551770	20620	594741	104912	1095615	946776	3055827	4003878	123551	12103	584232	1181851	50935	1216947	639150	211141	196516	9789099	115711	445	5857158	2068999	677585	894632	628633	1210320	62586	1410922
ATB-j14-exp3-colon_249	645	171827	22317	12474	4527155	15175	2387	22806	5946943	218571	9556041	25	7308	68907	17828515	734677	5262	1043	1768	7335684	2755122	485256	794755	2036801	100209	1047302	446466	1380522	16612	7028	11019	557303	1142983	202	1050523	7505	183528	498983	5391963	128722	10269	2614556	216008	1003942	38663663	1075184	683312	24921665	771833
Nacl-j7-exp3-colon_228	55479	1979302	185276	5198	3052191	5812	365	10151	1149823	21822	2683162	1849	378116	589392	19275960	3166	687180	1279	2979	10207786	20668	2570695	24455	630570	152827	1268728	773233	2173859	1380436	1613860	89026	729977	1214014	73231	1186743	446270	16996	343954	986132	27376	1973217	4215564	42011	254447	535007	310961	459383	55535	1783393
ATB-j7-exp3-colon_229	73	148478	38569	11918	4804760	16218	1909	22244	4109937	225235	8113542	2	4797	65618	13355197	742710	181	873	1463	7997402	2411314	520327	310334	1654158	71423	1273075	288066	1008235	1998	2071	3372	679369	1230652	44	969917	562	156615	293082	6278801	147077	721	1839599	167737	995791	48180115	1233363	534336	27263877	646426
FECES-j14-exp3-colon_253	464443	143293	52453	11667	1492091	6745	1781	7167	235390	16386	2251142	15339	191546	571387	9577947	1765	1440643	696	1751	603142	27595	1567185	10801	250410	77557	999873	555687	3951605	2996861	610555	4390	564181	1131472	72626	687495	3336320	13951	101542	391414	21635	2468835	7429958	15701	84515	201344	291841	312994	32053	331220
Nacl-j3-exp3-colon_199	7989	186525	268986	52629	2885032	5027	568	17736	1078579	58384	5274118	640	191550	613222	10991535	3705	1468445	1230	2402	2267417	22804	1998168	20179	729310	52771	1199462	340530	3184815	2651817	2299171	4827	697298	1278405	12130	951133	55799	158774	206040	1414642	28116	2801043	6050470	21495	101412	505566	373740	222333	24832	861413
AKKERMANSIA-j3-exp3-colon_219	5996	325045	9600145	40123	741674	24246	725	38480	3138890	599486	22911740	56	42970	385158	2048057	411221	42497	937	4208	3617912	72442	1558444	17230	672833	85819	1306779	447154	7733268	796391	79490	18533	738571	1271989	6316	794525	25215	492007	60310	1670329	167365	774	14566932	242616	537857	1519930	753351	604962	282892	419361
ATB-j14-exp3-colon_252	64	134597	11738	14578	4169553	8643	117	9095	1883496	160046	3929793	38	4883	46544	7267414	395119	602	519	1514	4559715	1449237	233019	65788	486888	67554	1098343	139731	1553788	2260	3183	4915	573525	1153683	74	477599	1327	57092	97914	2320626	65618	1921	3016806	110096	602134	28902865	502497	269934	18388864	205906
AKKERMANSIA-j7-exp3-colon_245	58070	356854	1057961	135388	1503236	10031	518	38948	2964705	135413	19883174	598	107111	152206	14937044	88724	387304	1279	3295	1780334	32020	1898896	18755	821218	131422	1053614	2288261	5232883	4723345	88394	43834	534161	1127514	40449	1057696	722638	51186	89039	6731009	104114	240	9928000	27153	589333	602002	566804	1080554	44499	1067099
ATB-j7-exp3-colon_234	116	236819	94726	15627	5043312	16016	3314	80429	4324280	214938	12239778	2	6231	96664	43192773	465404	1465	1768	1357	5981994	2052700	922686	407430	3350714	88843	1351300	371254	1368451	8229	5034	5074	632754	1236757	83	1847457	1869	903467	419618	10024935	122451	2035	2645041	163957	809305	36242919	2068506	623928	24195908	1057253
Nacl-j7-exp3-colon_227	14851	251807	151945	37188	1351947	6427	540	12426	475300	49432	6677664	1227	261471	523885	13701361	3190	326965	1268	1357	1020874	21407	1382581	17929	1990901	100824	1573708	529469	6429243	411283	1565235	1500	805213	1340601	40342	993857	166369	40090	162389	794604	46482	1714683	12309074	15187	87185	416241	396966	312513	62113	593458
FECES-j14-exp3-colon_254	63036	960881	129966	25093	3765669	5686	491	23300	616878	51586	4595418	4283	229006	617471	24050866	7787	548719	1483	1898	1843840	34615	1507552	28439	989686	41870	1055823	552996	3357339	2312562	1001889	535	587078	1150626	28853	1120154	1246257	173023	201112	5291984	25240	1403604	6515493	22080	96180	443169	551996	256014	101320	955480
ATB-j3-exp3-colon_210	19	188239	25939	11393	4578398	15551	1817	31566	4598757	195594	9821993	19	4976	72133	22008031	477885	221	916	2020	4895082	2330306	561025	584222	1801881	103472	1293898	379610	1650227	951	3259	4711	675802	1357403	5	799274	629	205269	454422	5693004	129148	540	3184496	176361	841376	23266927	1130725	588784	25526775	679806
AKKERMANSIA-j3-exp3-colon_222	214	284268	7061954	84540	2395361	15550	740	39098	5293019	326789	19709759	39	23603	279204	14282136	590235	4513	1372	1797	1846889	3048388	1713938	18371	1064248	134170	1132485	304146	4596383	101611	12702	17933	667753	1155594	1015	1156161	3522	812134	164143	6865871	91661	3722	8730650	1456575	1511600	4265269	1904621	821039	26769975	322032
FECES-j3-exp3-colon_216	3165	440975	10157577	43083	4620174	12843	1459	52493	5329608	259694	14104846	30	20187	362885	19201486	420246	31020	1624	1909	1204641	2250959	2485381	26639	1172460	84171	1735007	474738	2847234	566871	3044	19278	822063	1468592	3658	1502359	17496	492449	160106	9831017	73195	1197	5470324	955544	1166949	658973	2045491	1258008	14465551	299178
ATB-j14-exp3-colon_247	398	120151	17438	8573	2529522	45797	791	15295	1850521	197975	5744411	58	9397	60154	4241757	419246	1322	671	1729	6936834	1964525	253564	121932	657498	48000	1033015	147836	3852958	5262	15977	4817	528978	1220783	137	541553	2929	80829	119057	2131898	108342	12325	7285661	140735	753539	33984021	602715	228678	20410335	335247
AKKERMANSIA-j7-exp3-colon_246	6089	573876	471248	96391	1326638	11567	1198	69524	4282497	111727	23780301	1143	230262	178600	14679885	35060	149861	1563	2768	2365572	58304	1662481	25414	2002590	114766	1027886	2206795	5265847	2097014	536197	36864	538792	1139292	34770	1548645	487487	420629	166561	5920686	329353	227	9963088	39981	394660	666129	1077073	1308492	118894	1045694
FECES-j14-exp3-colon_255	329166	178629	88201	11620	2485572	6921	1688	14116	485350	25515	3677663	8431	219479	843212	10945077	3223	1685507	833	2140	1038018	35029	1556109	17173	704114	91780	1151284	620697	4170540	3439847	829903	1011	600699	1160958	68760	865307	1985090	23526	196205	1995491	23272	2540265	7928132	23864	109525	199076	346646	275937	22696	362276
St_SCFA-exp2-colon_pre	NA	NA	NA	NA	NA	NA	NA	NA	NA	NA	NA	NA	26660	NA	NA	NA	NA	NA	NA	NA	NA	NA	NA	NA	NA	NA	NA	NA	NA	215700	NA	NA	NA	NA	NA	NA	NA	NA	NA	NA	NA	NA	NA	NA	NA	NA	NA	NA	NA
St_PA-exp1-colon_pre	NA	NA	NA	NA	NA	NA	NA	NA	NA	NA	NA	NA	NA	NA	NA	NA	NA	NA	NA	NA	NA	NA	NA	NA	NA	NA	NA	NA	NA	NA	62	NA	NA	NA	NA	NA	NA	NA	NA	NA	NA	NA	NA	NA	NA	NA	NA	NA	NA
St_BA1-exp3-colon_pre	2783	NA	NA	NA	NA	NA	NA	NA	NA	NA	NA	178751	NA	NA	NA	NA	9185	NA	NA	NA	NA	NA	NA	NA	NA	NA	NA	NA	2851	NA	NA	NA	NA	165890	NA	166754	NA	NA	NA	NA	283890	NA	NA	NA	NA	NA	NA	NA	NA
St_AA-exp1-colon_pre	NA	97977	1921	5321	3218100	6624	78	3	1036497	901	197945	NA	NA	655	2705263	48	NA	3	167	212	922	1396	133	150506	8380	1333000	1100564	1981192	NA	NA	NA	351857	511220	NA	1121	NA	36038029	50693	67239	963	NA	3834878	1858	17	1785	646681	818992	379	3319
St_BA2-exp3-colon_pre	98908	NA	NA	NA	NA	NA	NA	NA	NA	NA	NA	39	NA	NA	NA	NA	119	NA	NA	NA	NA	NA	NA	NA	NA	NA	NA	NA	748590	NA	NA	NA	NA	138934	NA	2419	NA	NA	NA	NA	9214	NA	NA	NA	NA	NA	NA	NA	NA
St_SCFA-exp2-colon_post	NA	NA	NA	NA	NA	NA	NA	NA	NA	NA	NA	NA	11008	NA	NA	NA	NA	NA	NA	NA	NA	NA	NA	NA	NA	NA	NA	NA	NA	134762	NA	NA	NA	NA	NA	NA	NA	NA	NA	NA	NA	NA	NA	NA	NA	NA	NA	NA	NA
St_SCFA1-exp1-colon_pre	NA	NA	NA	NA	NA	NA	NA	NA	NA	NA	NA	NA	18867	NA	NA	NA	NA	NA	NA	NA	NA	NA	NA	NA	NA	NA	NA	NA	NA	171225	NA	NA	NA	NA	NA	NA	NA	NA	NA	NA	NA	NA	NA	NA	NA	NA	NA	NA	NA
St_BA2-exp3-colon_post	94844	NA	NA	NA	NA	NA	NA	NA	NA	NA	NA	24	NA	NA	NA	NA	NA	NA	NA	NA	NA	NA	NA	NA	NA	NA	NA	NA	719693	NA	NA	NA	NA	95173	NA	1869	NA	NA	NA	NA	7741	NA	NA	NA	NA	NA	NA	NA	NA
St_BA1-exp3-colon_post	2776	NA	NA	NA	NA	NA	NA	NA	NA	NA	NA	210665	NA	NA	NA	NA	8753	NA	NA	NA	NA	NA	NA	NA	NA	NA	NA	NA	NA	NA	NA	NA	NA	144021	NA	183348	NA	NA	NA	NA	256859	NA	NA	NA	NA	NA	NA	NA	NA
St_BA1-exp1-colon_pre	1979	NA	NA	NA	NA	NA	NA	NA	NA	NA	NA	206093	NA	NA	NA	NA	7629	NA	NA	NA	NA	NA	NA	NA	NA	NA	NA	NA	3991	NA	NA	NA	NA	206553	NA	164687	NA	NA	NA	NA	324790	NA	NA	NA	NA	NA	NA	NA	NA
St_BA2-exp1-colon_pre	99291	NA	NA	NA	NA	NA	NA	NA	NA	NA	NA	902	NA	NA	NA	NA	327	NA	NA	NA	NA	NA	NA	NA	NA	NA	NA	NA	904049	NA	NA	NA	NA	425810	NA	3327	NA	NA	NA	NA	21541	NA	NA	NA	NA	NA	NA	NA	NA
St_PA-exp1-colon_post	NA	NA	NA	NA	NA	NA	NA	NA	NA	NA	NA	NA	NA	NA	NA	NA	NA	NA	NA	NA	NA	NA	NA	NA	NA	NA	NA	NA	NA	NA	71	NA	NA	NA	NA	NA	NA	NA	NA	NA	NA	NA	NA	NA	NA	NA	NA	NA	NA
St_AA-exp1-colon_post	NA	279304	17124	33020	5379509	11187	833	753	1902527	4192	994661	NA	NA	48628	4213036	232	NA	24	3357	1852	2036	6835	388	329165	21736	779678	2704292	3659661	NA	NA	NA	500134	780878	NA	1234	NA	83526118	246980	130764	33976	NA	6744203	3836	38477	6560	2129326	1256345	4282	4329
St_PA-exp2-colon_pre	NA	NA	NA	NA	NA	NA	NA	NA	NA	NA	NA	NA	NA	NA	NA	NA	NA	NA	NA	NA	NA	NA	NA	NA	NA	NA	NA	NA	NA	NA	221	NA	NA	NA	NA	NA	NA	NA	NA	NA	NA	NA	NA	NA	NA	NA	NA	NA	NA
St_AA_exp2-colon_pre	NA	173832	15057	6134	3622776	8136	183	47	1344263	1797	438412	NA	NA	2226	1998607	48	NA	13	861	421	1515	2676	93	183963	13887	2061569	1179753	5704723	NA	NA	NA	447642	648051	NA	780	NA	45549840	72966	86214	1359	NA	10921857	2839	42	2838	766146	995984	1223	634
St_SCFA1-exp1-colon_post	NA	NA	NA	NA	NA	NA	NA	NA	NA	NA	NA	NA	12756	NA	NA	NA	NA	NA	NA	NA	NA	NA	NA	NA	NA	NA	NA	NA	NA	202140	NA	NA	NA	NA	NA	NA	NA	NA	NA	NA	NA	NA	NA	NA	NA	NA	NA	NA	NA
St_SCFA-exp3-colon_pre	NA	NA	NA	NA	NA	NA	NA	NA	NA	NA	NA	NA	23770	NA	NA	NA	NA	NA	NA	NA	NA	NA	NA	NA	NA	NA	NA	NA	NA	179823	NA	NA	NA	NA	NA	NA	NA	NA	NA	NA	NA	NA	NA	NA	NA	NA	NA	NA	NA
St_PA-exp2-colon_post	NA	NA	NA	NA	NA	NA	NA	NA	NA	NA	NA	NA	NA	NA	NA	NA	NA	NA	NA	NA	NA	NA	NA	NA	NA	NA	NA	NA	NA	NA	580	NA	NA	NA	NA	NA	NA	NA	NA	NA	NA	NA	NA	NA	NA	NA	NA	NA	NA
St_AA_exp2-colon_post	NA	84525	2037	28359	5699776	11782	806	42	2064515	2099	452329	NA	NA	13552	2905590	148	NA	53	834	1925	3003	2613	117	348217	13442	467007	3128150	7750024	NA	NA	NA	428849	883137	NA	663	NA	80047158	280566	111064	8311	NA	15205366	2991	10744	6743	1713496	1486969	7825	1310
St_PA-exp3-colon_pre	NA	NA	NA	NA	NA	NA	NA	NA	NA	NA	NA	NA	NA	NA	NA	NA	NA	NA	NA	NA	NA	NA	NA	NA	NA	NA	NA	NA	NA	NA	63	NA	NA	NA	NA	NA	NA	NA	NA	NA	NA	NA	NA	NA	NA	NA	NA	NA	NA
St_AA_exp3-colon_pre	NA	128354	1191	7419	3379657	5652	146	52	1162640	747	284324	NA	NA	3756	2097152	116	NA	23	597	1036	1871	4968	178	178024	18896	1324159	1032595	4891533	NA	NA	NA	496528	678668	NA	1149	NA	51915073	74558	99526	1759	NA	9308622	1162	336	4957	736102	859322	3455	484
St_BA2-exp1-colon_post	101825	NA	NA	NA	NA	NA	NA	NA	NA	NA	NA	844	NA	NA	NA	NA	445	NA	NA	NA	NA	NA	NA	NA	NA	NA	NA	NA	950177	NA	NA	NA	NA	202208	NA	3028	NA	NA	NA	NA	10856	NA	NA	NA	NA	NA	NA	NA	NA
St_BA1-exp1-colon_post	2010	NA	NA	NA	NA	NA	NA	NA	NA	NA	NA	233634	NA	NA	NA	NA	4432	NA	NA	NA	NA	NA	NA	NA	NA	NA	NA	NA	4090	NA	NA	NA	NA	142088	NA	180102	NA	NA	NA	NA	251780	NA	NA	NA	NA	NA	NA	NA	NA
St_BA1-exp2-colon_pre	2483	NA	NA	NA	NA	NA	NA	NA	NA	NA	NA	194060	NA	NA	NA	NA	10977	NA	NA	NA	NA	NA	NA	NA	NA	NA	NA	NA	3192	NA	NA	NA	NA	153229	NA	168879	NA	NA	NA	NA	262454	NA	NA	NA	NA	NA	NA	NA	NA
St_BA2-exp2-colon_pre	106485	NA	NA	NA	NA	NA	NA	NA	NA	NA	NA	138	NA	NA	NA	NA	NA	NA	NA	NA	NA	NA	NA	NA	NA	NA	NA	NA	888655	NA	NA	NA	NA	207566	NA	3145	NA	NA	NA	NA	16576	NA	NA	NA	NA	NA	NA	NA	NA
St_SCFA-exp3-colon_post	NA	NA	NA	NA	NA	NA	NA	NA	NA	NA	NA	NA	14667	NA	NA	NA	NA	NA	NA	NA	NA	NA	NA	NA	NA	NA	NA	NA	NA	181005	NA	NA	NA	NA	NA	NA	NA	NA	NA	NA	NA	NA	NA	NA	NA	NA	NA	NA	NA
St_PA-exp3-colon_post	NA	NA	NA	NA	NA	NA	NA	NA	NA	NA	NA	NA	NA	NA	NA	NA	NA	NA	NA	NA	NA	NA	NA	NA	NA	NA	NA	NA	NA	NA	244	NA	NA	NA	NA	NA	NA	NA	NA	NA	NA	NA	NA	NA	NA	NA	NA	NA	NA
St_AA_exp3-colon_post	NA	88593	5113	36205	5503202	8110	1137	518	1973353	1290	726040	NA	NA	17072	3365397	283	NA	19	1066	2272	3247	3632	350	342697	11365	466877	2670063	6961107	NA	NA	NA	515740	922925	NA	1707	NA	85050676	313366	138292	9779	NA	13377093	3832	18305	9935	1691354	1230987	7388	984
St_cadaverine-exp3-colon_7a	NA	NA	NA	NA	NA	NA	NA	NA	NA	NA	NA	NA	NA	NA	NA	NA	NA	NA	NA	NA	NA	NA	NA	NA	NA	NA	NA	NA	NA	NA	11003892	NA	NA	NA	NA	NA	NA	NA	NA	NA	NA	NA	NA	NA	NA	NA	NA	NA	NA
St_BA2-exp2-colon_post	110600	NA	NA	NA	NA	NA	NA	NA	NA	NA	NA	43	NA	NA	NA	NA	NA	NA	NA	NA	NA	NA	NA	NA	NA	NA	NA	NA	931518	NA	NA	NA	NA	184255	NA	4069	NA	NA	NA	NA	10730	NA	NA	NA	NA	NA	NA	NA	NA
St_BA1-exp2-colon_post	2339	NA	NA	NA	NA	NA	NA	NA	NA	NA	NA	217958	NA	NA	NA	NA	11779	NA	NA	NA	NA	NA	NA	NA	NA	NA	NA	NA	4065	NA	NA	NA	NA	133995	NA	177332	NA	NA	NA	NA	243124	NA	NA	NA	NA	NA	NA	NA	NA
[truncated: 102 more columns]

## Sheet: Height
Sid	12-dehydrocholic acid@5.38-ba	2-hydroxybutyric acid@7.23-gc	2-hydroxyglutaric acid@13.01-gc	2-oxoglutaric acid@13.01-gc	3-hydroxybutyric acid@7.41-gc	3-hydroxyisovaleric acid@7.82-gc	3-methylhistidine@16.86-gc	4-hydroxymandelic acid@15.23-gc	4-hydroxyproline@12.44-gc	5-aminovaleric acid@13.53-gc	5-oxoproline@12.35-gc	7,12-dihydroxy-3-oxocholanoic acid@7.11-ba	Acetic acid@1.78-sf	Adenine@16.19-gc	Alanine@6.92-gc	Allantoin@16.54-gc	Alpha-muricholic acid@6.00-ba	Alpha-tocopherol@29.51-gc	Anthranilic acid@13.43-gc	Arabinose@14.17-gc	Arabitol@14.82-gc	Arachidonic acid@23.75-gc	Asparagine@14.13-gc	Aspartic acid@12.37-gc	Behenic acid@26.41-gc	Benzoic acid@8.76-gc	Beta-alanine@11.16-gc	Beta-hydroxypyruvic acid@5.45-gc	Beta-muricholic acid@6.27-ba	Butanoic acid@5.24-sf	Cadaverine@4.45-pa	Capric acid@11.44-gc	Caprylic acid@8.95-gc	Chenodeoxycholic acid@10.32-ba	Cholesterol@29.51-gc	Cholic acid@9.13-ba	Citric acid;Isocitric acid@15.81-gc	Citrulline@15.78-gc	Creatine@12.80-gc	Cytosine@12.37-gc	Deoxycholic acid@10.54-ba	Dimethylglycine@5.45-gc	Erythritol@12.29-gc	Ferulic acid@19.20-gc	Fructose@16.48-gc	Fumaric acid@10.06-gc	GABA@12.44-gc	Galactitol;Sorbitol;Mannitol@17.29-gc	Galactose;Glucose;Mannose@17.01-gc
BlM-exp2-colon_pre	NA	NA	NA	NA	NA	NA	NA	NA	NA	NA	NA	NA	504	NA	NA	NA	NA	NA	NA	NA	NA	NA	NA	NA	NA	NA	NA	NA	NA	49	NA	NA	NA	NA	NA	NA	NA	NA	NA	NA	NA	NA	NA	NA	NA	NA	NA	NA	NA
BlM_exp1-colon_pre	3	64862	1365	66	932378	1351	163	17	1129	199	61938	3	NA	236	351409	15	11	13	364	215	34	1290	493	2032	4794	683957	1018	1594523	10	NA	8	199745	483325	71	1052	76	38042	428	133	186	108	2905976	228	30	1454	24728	468	126	620
BlM-exp2-colon_post	NA	NA	NA	NA	NA	NA	NA	NA	NA	NA	NA	NA	423	NA	NA	NA	NA	NA	NA	NA	NA	NA	NA	NA	NA	NA	NA	NA	NA	85	NA	NA	NA	NA	NA	NA	NA	NA	NA	NA	NA	NA	NA	NA	NA	NA	NA	NA	NA
BlM-exp1-colon_pre	NA	NA	NA	NA	NA	NA	NA	NA	NA	NA	NA	NA	509	NA	NA	NA	NA	NA	NA	NA	NA	NA	NA	NA	NA	NA	NA	NA	NA	84	NA	NA	NA	NA	NA	NA	NA	NA	NA	NA	NA	NA	NA	NA	NA	NA	NA	NA	NA
BlM_exp3-colon_pre	7	95748	728	84	647351	2372	186	8	750	180	61815	7	NA	713	146186	26	25	61	368	334	135	1450	873	1311	9694	787208	1340	1575914	16	NA	29	346451	715630	28	253	40	50067	108	296	314	37	2909728	154	237	584	16866	915	551	108
BlM_exp1-colon_post	8	130453	8851	157	1672637	3016	538	926	70556	669	505952	9	NA	18905	473646	31	23	84	1392	813	947	9572	664	16613	20989	853163	4564	2576912	48	NA	83	352152	765044	13	1960	62	9313	840	3601	16349	121	4519275	1620	34820	3305	296433	5369	1067	762
BlM_exp2-colon_pre	6	128661	4315	76	788534	3239	187	13	767	582	85553	4	NA	191	72007	121	6	50	369	4069	233	1000	784	1132	5137	573193	1046	2159123	31	NA	28	242420	643935	36	353	33	19934	167	298	151	81	4019523	224	261	3297	18339	1000	1173	175
BlM-exp1-colon_post	NA	NA	NA	NA	NA	NA	NA	NA	NA	NA	NA	NA	453	NA	NA	NA	NA	NA	NA	NA	NA	NA	NA	NA	NA	NA	NA	NA	NA	111	NA	NA	NA	NA	NA	NA	NA	NA	NA	NA	NA	NA	NA	NA	NA	NA	NA	NA	NA
BlM-exp3-colon_pre	NA	NA	NA	NA	NA	NA	NA	NA	NA	NA	NA	NA	686	NA	NA	NA	NA	NA	NA	NA	NA	NA	NA	NA	NA	NA	NA	NA	NA	91	NA	NA	NA	NA	NA	NA	NA	NA	NA	NA	NA	NA	NA	NA	NA	NA	NA	NA	NA
BlM_exp3-colon_post	5	42456	2421	213	1438339	3552	226	611	31201	502	270459	2	NA	5536	288755	156	13	117	477	571	943	3850	747	4100	7857	866478	2892	2044189	10	NA	44	386138	824609	28	521	36	3376	387	1748	3850	96	3760455	1187	11437	1182	131853	2486	1310	125
BlM_exp2-colon_post	4	47947	1739	109	1664390	4017	168	197	21377	586	153960	NA	NA	4282	251789	146	15	60	690	6962	1367	1650	817	3439	6788	697392	2946	2594791	67	NA	59	329598	855889	21	724	94	7399	473	1097	1477	157	5152515	1363	8878	5340	77314	3313	3200	232
BlM-exp3-colon_post	NA	NA	NA	NA	NA	NA	NA	NA	NA	NA	NA	NA	572	NA	NA	NA	NA	NA	NA	NA	NA	NA	NA	NA	NA	NA	NA	NA	NA	116	NA	NA	NA	NA	NA	NA	NA	NA	NA	NA	NA	NA	NA	NA	NA	NA	NA	NA	NA
QC_batch-exp2-colon_5d	NA	NA	NA	NA	NA	NA	NA	NA	NA	NA	NA	NA	14267	NA	NA	NA	NA	NA	NA	NA	NA	NA	NA	NA	NA	NA	NA	NA	NA	33637	NA	NA	NA	NA	NA	NA	NA	NA	NA	NA	NA	NA	NA	NA	NA	NA	NA	NA	NA
QC_exp123-colon_pre.bacolon3	9945	NA	NA	NA	NA	NA	NA	NA	NA	NA	NA	172	NA	NA	NA	NA	63162	NA	NA	NA	NA	NA	NA	NA	NA	NA	NA	NA	260321	NA	NA	NA	NA	5042	NA	134406	NA	NA	NA	NA	159271	NA	NA	NA	NA	NA	NA	NA	NA
QC_batch-exp2-colon_5e	NA	NA	NA	NA	NA	NA	NA	NA	NA	NA	NA	NA	14515	NA	NA	NA	NA	NA	NA	NA	NA	NA	NA	NA	NA	NA	NA	NA	NA	34851	NA	NA	NA	NA	NA	NA	NA	NA	NA	NA	NA	NA	NA	NA	NA	NA	NA	NA	NA
QC_batch-exp2-colon_5f	NA	NA	NA	NA	NA	NA	NA	NA	NA	NA	NA	NA	15086	NA	NA	NA	NA	NA	NA	NA	NA	NA	NA	NA	NA	NA	NA	NA	NA	36407	NA	NA	NA	NA	NA	NA	NA	NA	NA	NA	NA	NA	NA	NA	NA	NA	NA	NA	NA
QC_exp1-colon_5a	14383	627810	278809	20255	2152231	7366	801	11548	1253194	81145	3604626	253	NA	70369	17163444	173435	98496	698	1378	1042566	230006	374892	129483	827295	57913	707646	503085	617016	356231	NA	1779	263855	642751	7975	475888	137694	52936	149034	3544738	23645	282632	1164924	129090	179652	2547742	288658	321997	1381945	188632
QC_batch-exp2-colon_5g	NA	NA	NA	NA	NA	NA	NA	NA	NA	NA	NA	NA	15456	NA	NA	NA	NA	NA	NA	NA	NA	NA	NA	NA	NA	NA	NA	NA	NA	39301	NA	NA	NA	NA	NA	NA	NA	NA	NA	NA	NA	NA	NA	NA	NA	NA	NA	NA	NA
QC_exp1-colon_5b	14759	658876	286947	20817	2386746	6858	1075	14008	1427376	91587	4056913	207	NA	82342	17715683	212970	95785	802	1633	1043653	242441	448458	137045	936919	64354	828932	530636	714595	355900	NA	2067	285699	692402	6346	551924	137065	61805	190404	3897173	29301	271705	1375489	138352	194215	2781021	420144	360703	1546629	199666
QC_batch-exp2-colon_5h	NA	NA	NA	NA	NA	NA	NA	NA	NA	NA	NA	NA	15305	NA	NA	NA	NA	NA	NA	NA	NA	NA	NA	NA	NA	NA	NA	NA	NA	40509	NA	NA	NA	NA	NA	NA	NA	NA	NA	NA	NA	NA	NA	NA	NA	NA	NA	NA	NA
QC_exp1-colon_6a	NA	664338	283459	8126	2045493	7118	964	14005	1181267	115417	4234830	NA	NA	87538	15308592	97641	NA	901	2751	960131	209480	388652	104555	778621	60718	1135500	505903	1134390	NA	NA	NA	345376	746717	NA	512839	NA	20883	136911	3140583	39763	NA	2031859	136201	204693	2538691	542790	334653	1355528	171380
QC_exp1-colon_5c	14902	632149	295912	19748	2217622	6930	895	12393	1322174	88967	3826841	260	NA	82886	16838611	148794	95119	770	1978	1081000	216247	371718	100299	808390	54640	734862	534453	745360	357469	NA	1768	294583	684124	6923	516198	137539	58180	154687	3188884	30052	278396	1408860	139460	201627	2636772	445977	339715	1484219	202349
QC_batch-exp2-colon_5i	NA	NA	NA	NA	NA	NA	NA	NA	NA	NA	NA	NA	15124	NA	NA	NA	NA	NA	NA	NA	NA	NA	NA	NA	NA	NA	NA	NA	NA	40778	NA	NA	NA	NA	NA	NA	NA	NA	NA	NA	NA	NA	NA	NA	NA	NA	NA	NA	NA
QC_exp1-colon_6b	NA	750453	303413	13837	2287249	7781	768	12737	1256446	94966	4435882	NA	NA	95087	16043279	119382	NA	748	2072	1059920	237841	364537	68260	783196	65540	1152306	521069	1221125	NA	NA	NA	375568	794724	NA	546717	NA	36811	123203	3463453	44928	NA	2254828	138633	212891	2636404	711858	343696	1363694	186050
QC_exp1-colon_5d	14854	706759	330488	20767	2377816	8099	693	14387	1423684	104073	4299182	261	NA	105243	19035558	168550	96321	614	2897	1188546	256068	445252	111921	904338	67589	820188	577387	827696	356676	NA	1507	322144	765221	5744	581289	135112	60982	187584	3701466	42152	275823	1572864	149088	207172	2920076	424906	371378	1593475	221949
QC_batch-exp2-colon_5j	NA	NA	NA	NA	NA	NA	NA	NA	NA	NA	NA	NA	14424	NA	NA	NA	NA	NA	NA	NA	NA	NA	NA	NA	NA	NA	NA	NA	NA	42345	NA	NA	NA	NA	NA	NA	NA	NA	NA	NA	NA	NA	NA	NA	NA	NA	NA	NA	NA
QC_exp1-colon_6c	NA	665126	304538	15623	2199086	7280	981	13896	1188411	94419	4437574	NA	NA	89128	15470993	113266	NA	995	3400	1055583	236022	524755	56455	732657	71476	1202670	545517	1239681	NA	NA	NA	377794	834371	NA	572334	NA	41294	128330	3245441	45119	NA	2286583	140425	219792	2766649	658020	358849	1399794	180532
QC_exp123-colon_post.bacolon3	11596	NA	NA	NA	NA	NA	NA	NA	NA	NA	NA	234	NA	NA	NA	NA	68791	NA	NA	NA	NA	NA	NA	NA	NA	NA	NA	NA	278789	NA	NA	NA	NA	4255	NA	151090	NA	NA	NA	NA	167963	NA	NA	NA	NA	NA	NA	NA	NA
QC-exp1-colon_5a	NA	NA	NA	NA	NA	NA	NA	NA	NA	NA	NA	NA	20579	NA	NA	NA	NA	NA	NA	NA	NA	NA	NA	NA	NA	NA	NA	NA	NA	54403	NA	NA	NA	NA	NA	NA	NA	NA	NA	NA	NA	NA	NA	NA	NA	NA	NA	NA	NA
QC_exp123-colon_pre.bacolon1	12871	NA	NA	NA	NA	NA	NA	NA	NA	NA	NA	201	NA	NA	NA	NA	75565	NA	NA	NA	NA	NA	NA	NA	NA	NA	NA	NA	293635	NA	NA	NA	NA	6418	NA	157524	NA	NA	NA	NA	185990	NA	NA	NA	NA	NA	NA	NA	NA
QC-exp1-colon_5b	NA	NA	NA	NA	NA	NA	NA	NA	NA	NA	NA	NA	20201	NA	NA	NA	NA	NA	NA	NA	NA	NA	NA	NA	NA	NA	NA	NA	NA	55571	NA	NA	NA	NA	NA	NA	NA	NA	NA	NA	NA	NA	NA	NA	NA	NA	NA	NA	NA
QC_exp1-colon_6d	NA	604930	306990	12718	1818818	6995	622	13095	1287893	114063	4383768	NA	NA	118976	13583084	110198	NA	1058	4767	1034850	238958	357634	49356	791001	91369	1140328	523030	1128543	NA	NA	NA	375377	784943	NA	575042	NA	36021	172917	3206544	56879	NA	2037836	133889	220301	2863861	555697	353373	1504356	194177
QC_exp123-exp1-colon_6b	NA	NA	NA	NA	NA	NA	NA	NA	NA	NA	NA	NA	NA	NA	NA	NA	NA	NA	NA	NA	NA	NA	NA	NA	NA	NA	NA	NA	NA	NA	1156	NA	NA	NA	NA	NA	NA	NA	NA	NA	NA	NA	NA	NA	NA	NA	NA	NA	NA
QC_exp1-colon_5e	14789	715645	387912	18137	2176662	10044	919	15205	1537128	128216	5433996	205	NA	133203	18736440	150797	97247	947	4330	1276709	265416	493530	73841	980231	102812	1076557	660295	961007	355064	NA	1389	387923	848172	5804	646224	136236	69424	228322	3569934	58533	274966	1719089	173682	273752	3375961	650408	435956	1887591	248930
QC-exp1-colon_5c	NA	NA	NA	NA	NA	NA	NA	NA	NA	NA	NA	NA	21025	NA	NA	NA	NA	NA	NA	NA	NA	NA	NA	NA	NA	NA	NA	NA	NA	58700	NA	NA	NA	NA	NA	NA	NA	NA	NA	NA	NA	NA	NA	NA	NA	NA	NA	NA	NA
QC_exp1-colon_5f	15073	NA	NA	NA	NA	NA	NA	NA	NA	NA	NA	254	NA	NA	NA	NA	97043	NA	NA	NA	NA	NA	NA	NA	NA	NA	NA	NA	362855	NA	1209	NA	NA	5454	NA	138381	NA	NA	NA	NA	270263	NA	NA	NA	NA	NA	NA	NA	NA
QC-exp1-colon_5d	NA	NA	NA	NA	NA	NA	NA	NA	NA	NA	NA	NA	21157	NA	NA	NA	NA	NA	NA	NA	NA	NA	NA	NA	NA	NA	NA	NA	NA	58909	NA	NA	NA	NA	NA	NA	NA	NA	NA	NA	NA	NA	NA	NA	NA	NA	NA	NA	NA
QC_exp3-colon_5a	6046	330000	989027	21416	1654856	6996	667	16412	1346131	80184	4109859	117	NA	123371	11841137	153562	48664	837	742	1647081	470489	587428	80782	566700	93375	896870	389854	1492553	202291	NA	1008	371840	805331	8253	672572	150374	117750	130037	3339997	34877	186706	2760793	230914	231924	3635795	415373	288494	3859652	465145
QC_exp1-colon_5g	15300	NA	NA	NA	NA	NA	NA	NA	NA	NA	NA	283	NA	NA	NA	NA	98387	NA	NA	NA	NA	NA	NA	NA	NA	NA	NA	NA	362997	NA	1291	NA	NA	7401	NA	137882	NA	NA	NA	NA	274196	NA	NA	NA	NA	NA	NA	NA	NA
QC_exp3-colon_5d	6653	NA	NA	NA	NA	NA	NA	NA	NA	NA	NA	156	NA	NA	NA	NA	51155	NA	NA	NA	NA	NA	NA	NA	NA	NA	NA	NA	211300	NA	982	NA	NA	8566	NA	155548	NA	NA	NA	NA	191693	NA	NA	NA	NA	NA	NA	NA	NA
QC_exp2-colon_5a	17323	375051	179852	23792	2011434	6912	666	10084	1128273	79837	2536914	368	NA	70946	11683756	217370	89188	666	1144	4772627	327552	407839	57049	562034	70184	565404	340207	1585515	353493	NA	1558	263003	669591	9114	515097	226417	68844	123711	3014891	27053	270869	3107988	123282	214001	3213259	213726	277609	1487261	229573
QC_exp3-colon_5b	6356	333414	1129691	23480	1808709	7497	290	17960	1622449	96076	4632342	164	NA	147286	11782690	199763	49120	1177	1074	1854206	503517	614011	105704	692098	83833	871303	444072	1734337	205484	NA	922	405916	828748	8320	736751	154587	126573	171330	3536639	38281	185435	3189434	258478	234174	4232353	453099	329479	4140518	524850
QC-exp1-colon_5e	NA	NA	NA	NA	NA	NA	NA	NA	NA	NA	NA	NA	21527	NA	NA	NA	NA	NA	NA	NA	NA	NA	NA	NA	NA	NA	NA	NA	NA	60165	NA	NA	NA	NA	NA	NA	NA	NA	NA	NA	NA	NA	NA	NA	NA	NA	NA	NA	NA
QC_exp2-colon_6a	NA	316550	202843	23267	1593666	6945	493	11097	1143642	94664	3023351	NA	NA	81888	10858796	151794	NA	910	1049	4846100	356934	435898	36286	519437	67959	621410	380374	2810262	NA	NA	NA	275782	688406	NA	550970	NA	40897	92264	2400016	31971	NA	5611882	146460	220455	3197281	266190	294218	1693593	244168
QC_exp1-colon_5h	15724	NA	NA	NA	NA	NA	NA	NA	NA	NA	NA	299	NA	NA	NA	NA	100727	NA	NA	NA	NA	NA	NA	NA	NA	NA	NA	NA	363384	NA	1060	NA	NA	6857	NA	141537	NA	NA	NA	NA	278262	NA	NA	NA	NA	NA	NA	NA	NA
QC_exp3-colon_5e	7042	NA	NA	NA	NA	NA	NA	NA	NA	NA	NA	146	NA	NA	NA	NA	52089	NA	NA	NA	NA	NA	NA	NA	NA	NA	NA	NA	214296	NA	926	NA	NA	8003	NA	159396	NA	NA	NA	NA	191762	NA	NA	NA	NA	NA	NA	NA	NA
QC_exp2-colon_5b	18259	359256	199251	25661	2084903	6520	529	10216	1236732	95394	2811339	329	NA	82823	12486128	212928	88758	716	1530	4994057	350722	441217	57894	595797	67355	554197	383733	1614991	352804	NA	1658	273400	706250	8523	532753	226371	72754	146821	3243012	28464	273704	3178895	133715	218986	3282701	237177	302248	1586163	248820
QC_exp3-colon_5c	6550	337098	1159377	23474	1977280	8106	543	17645	1658559	109171	4890259	153	NA	149702	12349905	193417	50609	1109	1570	1844090	528090	645584	92255	679852	77215	909178	458143	1923028	208117	NA	1100	414122	893104	6470	706501	155478	125569	184107	3567171	38825	193232	3708360	259416	247183	4206474	478835	343080	4315189	525150
QC_exp2-colon_6b	NA	333357	203435	26054	1726361	7091	705	10487	1275001	102017	3326070	NA	NA	81895	13119244	187685	NA	665	1572	5010551	371379	404741	43518	609608	63163	645867	391268	2969036	NA	NA	NA	282516	710469	NA	556772	NA	46377	121271	2590599	36304	NA	5800468	149641	222665	3675470	280354	320760	1784607	265905
QC-exp1-colon_5f	NA	NA	NA	NA	NA	NA	NA	NA	NA	NA	NA	NA	21620	NA	NA	NA	NA	NA	NA	NA	NA	NA	NA	NA	NA	NA	NA	NA	NA	59844	NA	NA	NA	NA	NA	NA	NA	NA	NA	NA	NA	NA	NA	NA	NA	NA	NA	NA	NA
QC_exp3-colon_5f	7314	NA	NA	NA	NA	NA	NA	NA	NA	NA	NA	133	NA	NA	NA	NA	51789	NA	NA	NA	NA	NA	NA	NA	NA	NA	NA	NA	216099	NA	865	NA	NA	8259	NA	158447	NA	NA	NA	NA	193998	NA	NA	NA	NA	NA	NA	NA	NA
QC_exp2-colon_5c	17158	346438	203060	26557	2295400	7774	501	10556	1276425	98849	2951084	280	NA	84223	15568388	221489	87146	1079	1368	5322803	367841	493721	58251	626011	70441	572163	402359	1634063	350053	NA	1203	289358	730308	9115	578602	222089	78894	148855	3181219	29226	265083	3249609	145285	236249	3720833	255316	319662	1609729	254026
QC-exp1-colon_5g	NA	NA	NA	NA	NA	NA	NA	NA	NA	NA	NA	NA	21504	NA	NA	NA	NA	NA	NA	NA	NA	NA	NA	NA	NA	NA	NA	NA	NA	60302	NA	NA	NA	NA	NA	NA	NA	NA	NA	NA	NA	NA	NA	NA	NA	NA	NA	NA	NA
QC_exp2-colon_6c	NA	321384	216014	25432	1579776	8111	365	11239	1218985	104745	3443648	NA	NA	87653	11269849	175894	NA	884	1846	5221517	383834	446129	34636	581648	58980	664150	409770	3120935	NA	NA	NA	295644	762464	NA	566241	NA	46394	110151	2315886	36434	NA	6122162	157448	229561	3583854	309822	335595	1771164	270001
QC_exp3-colon_5g	6884	NA	NA	NA	NA	NA	NA	NA	NA	NA	NA	161	NA	NA	NA	NA	52705	NA	NA	NA	NA	NA	NA	NA	NA	NA	NA	NA	215198	NA	929	NA	NA	9510	NA	162521	NA	NA	NA	NA	192153	NA	NA	NA	NA	NA	NA	NA	NA
QC-exp1-colon_5h	NA	NA	NA	NA	NA	NA	NA	NA	NA	NA	NA	NA	21279	NA	NA	NA	NA	NA	NA	NA	NA	NA	NA	NA	NA	NA	NA	NA	NA	60955	NA	NA	NA	NA	NA	NA	NA	NA	NA	NA	NA	NA	NA	NA	NA	NA	NA	NA	NA
QC_exp2-colon_6d	NA	323701	226383	25572	1779645	8086	314	11238	1262363	115542	3735278	NA	NA	92739	11283311	166556	NA	729	2185	5299825	395830	463842	32196	606438	76058	712426	426508	3174751	NA	NA	NA	319724	797520	NA	599358	NA	52450	112821	2240052	41734	NA	6235108	158857	236219	3636416	325877	348149	1881724	272398
QC-exp3-colon_5a	NA	NA	NA	NA	NA	NA	NA	NA	NA	NA	NA	NA	18509	NA	NA	NA	NA	NA	NA	NA	NA	NA	NA	NA	NA	NA	NA	NA	NA	46923	NA	NA	NA	NA	NA	NA	NA	NA	NA	NA	NA	NA	NA	NA	NA	NA	NA	NA	NA
QC_exp2-colon_5d	17202	NA	NA	NA	NA	NA	NA	NA	NA	NA	NA	297	NA	NA	NA	NA	86193	NA	NA	NA	NA	NA	NA	NA	NA	NA	NA	NA	340403	NA	1467	NA	NA	8514	NA	216873	NA	NA	NA	NA	260256	NA	NA	NA	NA	NA	NA	NA	NA
QC_exp123-colon_post.bacolon1	14214	NA	NA	NA	NA	NA	NA	NA	NA	NA	NA	217	NA	NA	NA	NA	77737	NA	NA	NA	NA	NA	NA	NA	NA	NA	NA	NA	298378	NA	NA	NA	NA	5191	NA	163455	NA	NA	NA	NA	187815	NA	NA	NA	NA	NA	NA	NA	NA
QC_exp1-colon_5hb	15991	NA	NA	NA	NA	NA	NA	NA	NA	NA	NA	281	NA	NA	NA	NA	98473	NA	NA	NA	NA	NA	NA	NA	NA	NA	NA	NA	363320	NA	NA	NA	NA	7230	NA	139627	NA	NA	NA	NA	273501	NA	NA	NA	NA	NA	NA	NA	NA
QC_exp123-colon_pre.bacolon2	12685	NA	NA	NA	NA	NA	NA	NA	NA	NA	NA	220	NA	NA	NA	NA	81081	NA	NA	NA	NA	NA	NA	NA	NA	NA	NA	NA	308807	NA	NA	NA	NA	6039	NA	162125	NA	NA	NA	NA	211530	NA	NA	NA	NA	NA	NA	NA	NA
QC-exp3-colon_5b	NA	NA	NA	NA	NA	NA	NA	NA	NA	NA	NA	NA	18355	NA	NA	NA	NA	NA	NA	NA	NA	NA	NA	NA	NA	NA	NA	NA	NA	47485	NA	NA	NA	NA	NA	NA	NA	NA	NA	NA	NA	NA	NA	NA	NA	NA	NA	NA	NA
QC_exp2-colon_5e	17539	NA	NA	NA	NA	NA	NA	NA	NA	NA	NA	289	NA	NA	NA	NA	85320	NA	NA	NA	NA	NA	NA	NA	NA	NA	NA	NA	339453	NA	1271	NA	NA	7475	NA	221924	NA	NA	NA	NA	258776	NA	NA	NA	NA	NA	NA	NA	NA
QC-exp3-colon_5c	NA	NA	NA	NA	NA	NA	NA	NA	NA	NA	NA	NA	18436	NA	NA	NA	NA	NA	NA	NA	NA	NA	NA	NA	NA	NA	NA	NA	NA	47678	NA	NA	NA	NA	NA	NA	NA	NA	NA	NA	NA	NA	NA	NA	NA	NA	NA	NA	NA
QC_exp2-colon_5f	17769	NA	NA	NA	NA	NA	NA	NA	NA	NA	NA	288	NA	NA	NA	NA	87642	NA	NA	NA	NA	NA	NA	NA	NA	NA	NA	NA	344024	NA	1137	NA	NA	9790	NA	219688	NA	NA	NA	NA	258707	NA	NA	NA	NA	NA	NA	NA	NA
QC-exp3-colon_5d	NA	NA	NA	NA	NA	NA	NA	NA	NA	NA	NA	NA	18668	NA	NA	NA	NA	NA	NA	NA	NA	NA	NA	NA	NA	NA	NA	NA	NA	48799	NA	NA	NA	NA	NA	NA	NA	NA	NA	NA	NA	NA	NA	NA	NA	NA	NA	NA	NA
QC_exp3-colon_6a	NA	330639	1132877	22111	1867207	7085	675	18257	1573208	118924	5181767	NA	NA	170292	10494976	155506	NA	707	1093	1865054	519286	664961	73777	667832	91113	1117327	455870	2840518	NA	NA	NA	466681	1003489	NA	750251	NA	102110	150636	3083910	47931	NA	5375294	264413	263040	4077161	515240	344515	4102567	525424
QC_exp2-colon_5g	18192	NA	NA	NA	NA	NA	NA	NA	NA	NA	NA	338	NA	NA	NA	NA	87193	NA	NA	NA	NA	NA	NA	NA	NA	NA	NA	NA	340415	NA	938	NA	NA	7331	NA	222028	NA	NA	NA	NA	251281	NA	NA	NA	NA	NA	NA	NA	NA
QC-exp3-colon_5e	NA	NA	NA	NA	NA	NA	NA	NA	NA	NA	NA	NA	18946	NA	NA	NA	NA	NA	NA	NA	NA	NA	NA	NA	NA	NA	NA	NA	NA	49974	NA	NA	NA	NA	NA	NA	NA	NA	NA	NA	NA	NA	NA	NA	NA	NA	NA	NA	NA
QC_exp3-colon_6b	NA	319550	1106377	22881	1994064	7279	404	18297	1483479	114321	5527583	NA	NA	156026	10704737	161654	NA	1089	1936	1820923	503386	680978	65114	654085	91039	1108000	463779	2883140	NA	NA	NA	462551	975963	NA	744845	NA	101061	131949	3015106	47600	NA	5351548	259418	262157	4171813	523384	336180	4105857	515432
QC_exp3-colon_6c	NA	324343	1205443	24152	2112383	7393	611	20393	1606989	127238	5835946	NA	NA	166943	10344323	160108	NA	706	1656	1979289	519295	682852	63430	706948	85118	1103824	478887	2974576	NA	NA	NA	488289	975580	NA	753824	NA	110102	145791	2888610	51849	NA	5694360	281073	275768	4621696	523843	366924	4451502	561824
QC-exp3-colon_5f	NA	NA	NA	NA	NA	NA	NA	NA	NA	NA	NA	NA	18647	NA	NA	NA	NA	NA	NA	NA	NA	NA	NA	NA	NA	NA	NA	NA	NA	49545	NA	NA	NA	NA	NA	NA	NA	NA	NA	NA	NA	NA	NA	NA	NA	NA	NA	NA	NA
QC-exp3-colon_5g	NA	NA	NA	NA	NA	NA	NA	NA	NA	NA	NA	NA	19596	NA	NA	NA	NA	NA	NA	NA	NA	NA	NA	NA	NA	NA	NA	NA	NA	50473	NA	NA	NA	NA	NA	NA	NA	NA	NA	NA	NA	NA	NA	NA	NA	NA	NA	NA	NA
QC_exp3-colon_6d	NA	323766	1243838	23327	2220878	7673	547	19384	1480078	116425	6191992	NA	NA	164321	11244068	136779	NA	974	1811	1942550	549288	678841	47267	644666	86376	1091114	473584	3010526	NA	NA	NA	515090	993788	NA	761899	NA	106321	138768	2806050	51082	NA	5770804	281614	288558	4497763	579438	346384	4232370	535654
QC_exp123-colon_post.bacolon2	13580	NA	NA	NA	NA	NA	NA	NA	NA	NA	NA	245	NA	NA	NA	NA	80725	NA	NA	NA	NA	NA	NA	NA	NA	NA	NA	NA	308292	NA	NA	NA	NA	5708	NA	165042	NA	NA	NA	NA	213971	NA	NA	NA	NA	NA	NA	NA	NA
ATB-j7-exp1-colon_291	15	160190	25200	7007	2803228	6994	2839	18197	1734884	61417	3277351	10	532	22705	21171743	158298	45	1000	750	1505279	375219	290989	313155	944231	29841	853073	151601	819249	285	152	209	320765	669727	28	618471	206	220430	179626	3895287	44511	166	1522298	39224	213106	5877955	597754	177677	2694825	226900
HIRAE-j14-exp1-colon_323	5829	318677	30769	7685	1606673	4781	214	9240	260933	30016	1543919	166	34232	52964	15092540	1546	98228	730	622	275672	5525	223092	26695	401982	23980	697362	348875	2184824	504350	92082	4092	273606	656319	6707	284145	70112	46285	61200	478192	8154	281464	3986468	5550	14049	74330	196252	273783	3927	64889
Nacl-j7-exp1-colon_283	7008	516393	40711	2249	1605142	4641	158	3601	680021	12845	961723	209	38837	89052	13213916	1076	121983	873	1104	322402	10217	308281	14034	315985	53466	771167	425215	1400815	201992	94860	3093	315543	602817	8076	461150	64340	8563	127332	135575	11339	342400	2569761	10779	19142	110283	149351	150570	8354	70675
FRAGILIS-j7-exp1-colon_305	23669	318248	14346	9625	487298	3744	314	9187	148322	29182	1078236	674	14672	63016	7755227	1553	192342	919	4611	1139868	11081	387999	24727	201868	63080	804377	574037	2224850	1161793	37036	1757	317735	661272	10279	631383	383557	23509	30483	402206	28643	784701	4106993	8401	69181	138907	187295	405974	20158	90679
FRAGILIS-j7-exp1-colon_301	23448	248667	10430	2426	1754256	3147	425	4970	135873	79745	623740	257	14420	58637	7855042	1199	256071	1068	7683	413731	13402	1041124	15515	77489	40768	787025	398770	838162	794098	24464	4043	317397	638967	5962	531743	157291	14682	43766	242184	21185	659190	1578340	23270	85419	104420	152566	382711	5999	131892
ATB-j3-exp1-colon_259	7	181331	11733	5478	2407346	8791	3179	7715	2240009	105559	4344572	5	720	35674	14588732	258783	42	403	1120	2642000	862383	56969	617622	1117076	31414	1034914	221071	889106	245	141	684	290680	626095	36	213537	185	58324	211987	2210831	72364	173	1697860	92126	397942	11277682	1086878	251236	4980368	859456
ATB-j3-exp1-colon_263	5	176886	13823	5992	2533749	6513	2637	20324	2134943	133955	4617465	4	743	32756	20847231	466477	37	1037	1001	2891272	889138	235013	615416	1042549	44461	1054619	200476	1193130	252	113	443	312273	652493	20	634249	252	105219	213045	5391552	71908	176	2180262	103703	340423	7930720	809470	244792	4299726	464538
ATB-j7-exp1-colon_293	13	124738	8900	3638	2869165	7845	1217	12208	1466157	63354	2341198	4	555	23364	11153813	229989	34	1145	856	3014613	563248	199026	83613	559837	49757	749588	122596	609710	70	74	598	263884	634931	27	638387	128	55504	63994	3678939	47299	82	1119449	54873	283466	13750595	579948	187838	3811269	173773
BARNECIELA-j3-exp1-colon_277	3165	2973639	31809	18916	2358501	4470	2040	9749	918974	165439	7663208	96	12585	43036	14124744	250895	4650	458	1337	97177	45138	196882	21876	377287	51564	1149403	213729	1898312	59820	3293	1820	344756	673461	494	346436	87551	20862	198480	4270287	77872	195	3597771	523232	348510	449932	516638	434028	29853	333835
HIRAE-j3-exp1-colon_269	41	1430467	45928	10822	1695467	7257	11194	18500	5049113	151714	9384460	11	4541	41096	29163489	317965	267	865	1626	725626	892773	185884	877393	3183184	58299	1006903	441177	1430287	1271	298	755	306088	621331	66	381455	2177	45977	293294	3957347	24904	486	2649837	548898	327563	332212	1044777	704920	5451266	71910
ATB-j14-exp1-colon_314	9	155312	14411	5894	2823432	8005	1918	16134	1805913	93766	4081827	3	688	29967	16229599	274192	50	731	1400	2325067	683359	169609	302925	1131288	50722	932332	150616	546706	340	122	357	319999	727775	59	667943	183	78978	152828	3124480	54948	189	1009128	65778	354251	7856441	1058607	221629	4388507	336725
BARNECIELA-j3-exp1-colon_279	3651	4793942	29779	19405	2611587	4999	2828	11768	1225166	262035	8103440	134	12250	44218	8486488	640234	2589	602	2604	178077	33238	149933	17143	372282	38876	1009015	251134	1124868	10924	3669	2626	301020	610214	200	321373	80449	15250	209693	5109645	37783	73	2073996	619496	454697	533371	698446	498659	36059	128338
BARNECIELA-j7-exp1-colon_309	30710	251097	98788	19499	2014268	4121	1114	8727	374605	172569	5441874	656	15529	38117	10922472	267578	106833	745	1179	168285	6660	429420	24657	648717	51535	1034711	489966	1082002	384691	14892	61	314803	716563	6643	505566	325057	19967	73549	4013810	43383	622	2051613	14474	134282	76931	548013	429365	5969	88604
HIRAE-j7-exp1-colon_297	30794	479288	42654	7124	1867057	7252	527	7894	320609	59421	1872030	168	24428	50784	10398470	1380	62706	660	1842	538227	10338	438697	36315	452494	55987	885364	486121	1469573	447135	65490	10005	338568	634059	5474	331735	90742	42679	86375	4625137	16056	194549	2822627	7386	46126	87052	371060	393141	12152	326727
FRAGILIS-j14-exp1-colon_327	37991	375776	49725	30263	1626562	3616	445	8697	715820	145790	3605955	715	31609	254266	19059813	1744	509233	810	2030	654228	13485	429480	65763	1290337	54471	728520	487488	1470498	913640	134754	4411	291469	684891	36705	511535	320859	22269	313178	4501527	20237	864384	2658966	10808	41521	205115	286164	188091	10007	114202
Nacl-j7-exp1-colon_287	3355	778070	71542	2235	2000714	3896	472	5644	563323	12751	1120685	133	43447	93690	16190019	1121	83382	929	1471	1540637	9929	120237	14076	344872	66801	756508	663251	1626328	101400	101780	2699	311513	608594	2824	398246	34024	8180	177580	371274	16956	202947	3001868	12010	46108	99332	312532	269258	6537	79718
HIRAE-j7-exp1-colon_299	52569	147361	42591	8882	1532097	8556	578	8710	301886	84487	2175126	403	21545	104773	10139468	4400	140979	776	1419	110383	13309	369577	39747	585703	109912	644143	649429	1089743	783004	44434	7574	301566	627054	13111	493977	118903	31368	92793	4766611	18678	648529	2007990	13017	34115	86869	346654	449796	13802	117155
HIRAE-j14-exp1-colon_319	242	296765	27536	20213	1607185	5214	671	16476	349743	41965	1862750	119	26096	70378	10093040	1444	68683	684	1284	397714	6182	576878	41020	307358	84612	640697	715458	1146462	186052	72235	2743	285204	642786	3683	438936	7596	73808	57157	833589	24290	290004	2157104	7242	29106	104518	216607	453662	5220	189087
Nacl-j3-exp1-colon_253	12520	308153	32350	1775	1782540	5816	437	2258	228855	10497	794714	253	28667	48714	11795164	931	104802	493	906	229137	6662	116142	5288	200599	25797	760212	256971	2063286	215435	72192	5909	302011	637938	10059	200090	122561	7683	63267	163101	10412	333097	3796269	6028	25165	58219	238988	64843	7135	24479
HIRAE-j3-exp1-colon_267	35	928647	17649	4261	2220435	4366	2730	9816	2526574	115519	5926072	35	1680	48659	25792453	150356	252	423	1517	347847	535178	170360	583244	1869479	28658	997310	229611	1589298	1279	155	1085	334834	697921	286	227811	18888	31480	275691	3011736	27793	196	2823202	314927	278000	177192	431033	313181	2967136	64079
BARNECIELA-j14-exp1-colon_336	10737	913586	159637	2344	2200713	14014	646	7112	398522	38213	1983873	215	41350	109799	23869964	2005	44343	1213	4085	1025737	22559	694107	13831	796064	118009	961824	2460698	1069457	282815	73583	3744	432872	816314	16603	764080	178374	10921	341666	3395501	99560	1400	1980007	18424	112384	217288	467933	506010	16916	171806
FRAGILIS-j14-exp1-colon_328	16529	832341	50821	8816	787266	4672	284	8402	419328	105930	2363204	498	34607	333920	20237584	1997	264524	1067	1485	691396	14715	607956	39036	786976	64459	1009210	524279	2894250	399942	122040	5212	429378	756067	19014	543314	182950	12404	243750	3983828	18414	732948	5207687	10616	55783	166704	241415	141534	11283	119713
FRAGILIS-j7-exp1-colon_306	6176	281973	23552	5961	1951536	4680	477	9009	182958	99496	919315	338	24717	130717	12269163	1468	222631	977	3123	252503	8823	681739	17529	144539	36868	674049	521144	1306072	1272135	56978	827	343749	740453	NA	660118	130928	9597	61695	1218582	13040	1203712	2388821	201439	61242	112850	193973	387057	7897	87911
ATB-j14-exp1-colon_316	55	237284	14470	5870	2748603	9032	1210	12404	1856235	107378	3427250	4	621	46413	14443451	343252	189	757	978	2327416	646137	166603	342019	1059912	36864	781174	173660	935866	825	229	257	296221	694065	9	539258	979	100124	206098	3064257	76202	298	1735603	89639	293687	9904714	495885	206541	3997332	278199
FRAGILIS-j3-exp1-colon_274	2675	344099	2637648	20413	2038102	5508	323	33658	4193027	120546	4368367	65	12991	95618	26342555	249543	49331	805	1275	204795	9336	426980	15974	1679686	80361	897780	492583	1133887	444232	6549	4794	332931	653647	3428	842084	57969	206433	135247	5666291	32172	33350	2049420	17806	308141	250020	1410886	582624	9274	146855
BARNECIELA-j14-exp1-colon_331	5707	221538	106089	19646	1576274	7965	773	23159	736125	66803	6610360	647	23561	182702	20724334	673	71874	920	3427	376126	22977	711162	39930	1200222	120057	1134142	6542642	2367028	225101	84728	2734	478616	874721	9538	366712	85579	17418	211186	3985746	45872	878	4298988	12623	105619	197575	587758	1056943	19199	159045
BARNECIELA-j7-exp1-colon_310	3631	169963	102596	13445	1881977	3915	502	3293	315794	131881	2737862	99	17254	28062	5091941	134780	20032	309	1070	92011	6283	439923	16463	705421	17818	829327	436117	1939272	51668	16219	1207	335627	742516	2765	193454	38702	7733	77505	2271230	139758	375	3552070	6643	61876	79526	261538	186105	7417	33506
Nacl-j3-exp1-colon_255	7197	609943	25362	1150	1627240	4231	293	2302	333153	14037	844692	215	41081	56368	9356610	885	88953	743	1749	510944	11868	180696	8989	198021	54620	687373	184098	1271295	201516	112275	3848	272527	529080	8642	345337	100702	3964	213548	133121	12435	268218	2360497	10037	38851	86355	187880	100410	14869	50569
ATB-j14-exp1-colon_317	9	177254	10287	3582	2538389	7018	889	6776	2156673	99785	3074352	9	602	34860	6921079	249863	84	612	1259	2785897	749096	73440	138160	686857	45814	1139842	146813	474146	305	138	276	368153	760518	57	328553	135	36089	101581	2719224	54275	231	872060	82642	381935	10927003	539658	219869	4803559	164413
Nacl-j7-exp1-colon_285	11765	173718	49747	3991	1910219	6729	364	3419	186707	14639	1243254	169	18206	75331	7427252	1354	83447	459	1777	101978	6655	213550	5637	485509	31999	987142	175980	3706767	122851	32480	1246	336718	691435	10186	359092	112494	8352	100403	590062	25287	165070	6774066	10582	32675	56277	242653	138799	2519	29261
ATB-j3-exp1-colon_261	92	135814	11719	2857	2498303	5649	1258	6688	1458792	80603	2450254	16	762	26779	11597595	200120	158	558	1430	6713990	602977	219308	137184	465887	30608	881224	121357	742278	1729	139	346	292055	634781	123	376753	2662	50068	87360	2971696	82043	132	1380906	73523	305144	11396972	442568	163625	3366918	562254
HIRAE-j7-exp1-colon_295	172983	551993	80546	9350	981202	8362	927	21740	545574	94891	3206393	1034	29690	136440	29349479	127865	106593	1167	2112	104515	14314	1081770	61262	1484152	76256	884285	830250	3489669	1030185	57508	2581	383259	667287	12822	899904	554721	40523	262286	4240435	52208	3213	6334911	11961	70694	110101	442877	424289	51346	119433
Nacl-j3-exp1-colon_257	14701	219925	99511	26545	2108619	4034	448	9610	498081	49335	4095920	183	26641	156168	14226367	922	195824	467	1722	224492	7971	287636	13006	406222	34246	846588	390865	2535965	295620	130317	1566	354249	710852	11380	342749	70528	19334	116323	78271	21456	530309	4613842	9559	24362	104468	223347	121772	5242	61065
FRAGILIS-j14-exp1-colon_325	7732	259369	176437	36856	1402641	4495	311	12239	937623	138273	3228595	265	36780	160838	13991486	14112	248252	809	2952	182113	14392	190003	30836	454544	72383	943055	471509	1707083	316931	150841	2816	344594	764597	20589	470340	112996	32025	138262	4852649	21610	703758	3109121	13534	22824	108220	220385	134782	11746	43124
FRAGILIS-j14-exp1-colon_330	14815	353083	75012	17181	1050386	3980	439	10284	415100	55024	3314591	591	22668	193074	13097694	1769	340662	824	1586	862370	11730	582300	52840	1355685	67811	795594	368622	2238928	544039	83403	1591	348999	765028	21760	521800	174502	30211	155797	4586816	25365	758444	4222279	12281	54735	130575	233281	115558	6959	154386
FRAGILIS-j7-exp1-colon_303	15163	205880	70001	33151	2217549	4359	1043	21614	417869	49355	3251819	328	17907	146678	21477742	4542	318602	1109	1700	249844	12499	652922	80099	851272	73267	868089	1340009	1371256	726417	51197	1061	325243	720802	NA	802816	83065	117122	117531	2343950	27598	669863	2622841	15224	76831	146028	558814	634960	15384	95784
FRAGILIS-j3-exp1-colon_273	411	15222	995932	2427	847080	1211	530	2311	1264803	42572	904658	21	8939	38781	230234	58249	1877	141	1716	99526	23402	24124	1302	209542	11128	395195	62710	56	31623	1026	2149	99002	162173	525	66759	4860	6269	33358	764081	16964	1418	7767	138493	64190	296035	176093	131924	25351	14272
Nacl-j3-exp1-colon_254	19231	1072891	69271	8908	2430713	5270	842	18845	387442	35234	2928687	374	37306	97025	23102466	3795	212952	1101	2085	349308	14534	1062123	16621	875523	79927	940621	503342	1962579	370622	162488	2376	379071	672155	27072	754998	190002	37707	252397	1832472	26425	514930	3544792	13921	36545	101611	342413	141931	8427	119124
FRAGILIS-j3-exp1-colon_275	4298	358392	3814638	29123	1851454	4789	613	22482	4938173	177893	5263276	42	15140	84795	18225294	223302	60031	644	2222	1444932	15810	242830	15747	1646929	62289	1086678	590234	1081382	674973	42280	3151	340987	687225	4022	396782	65780	31371	106614	1165429	34166	15896	2045408	25122	317367	929429	759254	693712	14514	149387
HIRAE-j14-exp1-colon_324	2295	545178	20675	3958	1561885	4274	264	5815	246119	29332	1556100	113	36264	54128	14748691	989	269488	489	1719	503769	10474	107982	20624	265177	110718	1080990	675736	1393966	721926	85735	684	422320	813793	NA	379917	49715	22007	73359	135182	21217	454632	2610814	8964	69830	49274	316447	450514	8441	39016
ATB-j7-exp1-colon_289	11	154962	10979	3113	3066284	6870	635	8169	2230197	87146	2784958	5	529	41412	13729611	244141	97	868	1639	2770228	1377335	1287844	159983	464901	65127	939205	132464	673838	423	167	143	352421	721996	18	625221	208	50769	221879	3645870	95353	214	1218545	82103	379310	12112760	408482	214663	4822040	207872
ATB-j14-exp1-colon_315	5	112567	27486	6795	15864161	16157	1834	20462	1362560	155135	6595990	3	609	52623	785207	103026	76	1023	2241	2736570	825350	151907	118672	910471	53479	1020598	251471	4570297	249	99	214	408776	756663	35	809835	185	172325	97681	1096621	69146	198	8092867	83108	432390	13248969	988507	232670	5473073	884818
ATB-j7-exp1-colon_290	23	157794	21864	7956	2924262	11687	2988	14189	3019257	204874	5384230	11	646	52285	19179535	499268	88	726	1838	3327196	1061513	202708	553062	1261423	51910	1183438	242499	902148	697	174	168	355005	701826	27	561807	441	81730	256881	4149729	110231	295	1676076	101674	538673	11943639	1289739	307854	5170236	481036
BARNECIELA-j7-exp1-colon_307	10801	207276	52025	18632	1927969	4562	1389	13917	284610	325787	6178504	157	13009	43551	11937072	995140	42441	1035	2746	162699	8122	907548	17315	444615	58507	968614	551574	1013116	181844	11819	439	342277	720833	4628	616358	139005	35355	52040	8789982	67286	624	1828343	12336	317112	75219	618971	391084	5564	65019
BARNECIELA-j3-exp1-colon_280	1496	4654691	41498	33844	2870216	6583	1449	10232	1516993	211306	12816650	74	14762	54929	8237038	245400	5611	476	2563	252867	41141	96393	23058	526615	44138	1370943	306712	1341539	76177	5314	1041	343232	666536	319	230978	35205	12564	256094	4223505	67228	247	2515292	697890	471960	938947	898806	510353	31695	304105
Nacl-j7-exp1-colon_286	26629	849993	68336	2695	2352610	3339	421	5462	589215	23721	1562858	579	18078	92954	19088486	1342	175248	890	1320	216659	6906	401620	6033	533950	27026	1037881	268753	2245219	309082	56660	2953	371255	716037	15778	433860	259809	13421	105274	1192541	20556	294244	4184632	8624	47702	57251	473263	152579	3190	37118
Nacl-j3-exp1-colon_256	18698	336561	29164	1558	2047038	3138	386	4983	294734	10477	1023159	393	21740	158566	11565020	1266	175943	1241	1551	336715	8544	530374	5262	175567	51243	809269	251926	1630904	322249	43022	1877	319090	654920	14638	623334	158257	9858	82919	747513	17901	487174	3042122	12239	36463	77801	338099	142383	4513	73306
BARNECIELA-j7-exp1-colon_311	4692	678478	499591	17729	2315307	3796	1345	11285	310414	225616	7357065	124	23706	47574	13105597	267544	12606	600	3236	247805	12711	447295	14570	515939	37929	1024101	402764	1268211	74364	25995	549	357775	730739	2610	395086	94578	17490	89578	4523020	36275	1041	2293066	17534	289979	168199	511247	309734	6338	116936
HIRAE-j7-exp1-colon_298	71901	222168	82017	8993	2021974	7484	1284	9914	913052	44333	1850622	243	25587	116135	11478625	2947	107361	753	3286	140531	17487	580457	25995	630032	116178	752140	933279	1240898	829830	47447	3445	326192	717940	26539	528083	95990	40554	103366	6338947	23976	510972	2183798	13353	88708	85979	390250	564635	22073	81069
HIRAE-j3-exp1-colon_268	25	585089	25139	8173	2716630	4843	6290	14044	3441275	191015	8305585	8	1812	64609	20014196	367519	169	713	2622	566454	972113	379876	352054	2233044	46758	1077132	259595	955301	771	146	402	351446	723996	74	346531	4067	68370	228009	3963000	43452	319	1845700	513809	417595	285405	759693	426994	4466696	87213
FRAGILIS-j3-exp1-colon_271	1482	517062	6718501	42684	1770330	7940	1413	19284	5345801	204685	6576729	63	14725	181836	13949026	335052	10601	655	3515	309331	99928	159949	14761	775154	92084	1342173	688368	1868068	147359	1214	2307	426049	796744	601	466414	14925	67632	153290	3138451	34011	11454	3362466	714339	664276	1339618	1319297	814611	26674	101570
BARNECIELA-j3-exp1-colon_281	1392	2582737	56936	12987	3164073	7333	2410	24390	952288	119669	7339086	65	9383	57066	13537969	134436	977	897	2220	110127	23644	395555	18782	637925	64811	1004593	253842	952587	5894	3164	1801	322822	681762	155	628098	38398	97988	310691	5845345	36703	151	1766661	588190	353187	552342	688636	569964	38792	823505
HIRAE-j3-exp1-colon_265	44	598871	24253	4042	2173717	3885	3768	16375	3266604	138009	7831306	19	2546	61139	28424017	175912	228	578	1984	410999	681134	283671	450616	2262827	44034	1062305	253774	1115566	1111	183	926	341899	713464	84	353987	4778	17338	273079	3578879	40779	517	2050779	413136	352993	240594	760746	412470	3893592	68952
HIRAE-j14-exp1-colon_321	2463	352614	21021	4458	1723246	5388	520	7163	222509	13617	1528202	63	29986	49016	7091470	1443	97510	462	1783	289081	9888	182300	12787	221762	76649	930741	452231	2444889	373776	72985	1542	319181	747980	2049	386192	61839	33771	38318	116470	16485	297774	4521004	8300	48110	60346	455231	222662	20376	64272
BARNECIELA-j14-exp1-colon_332	7749	458110	66127	14869	1927432	4090	445	12752	411943	28124	1988972	912	36162	89940	13536299	1408	27854	811	2045	965737	11362	430181	21228	391728	102622	931250	383084	1984331	75157	125079	1212	400750	793321	6610	390086	140396	34090	110751	3429094	17279	1065	3619633	9002	80809	147462	451653	89425	9397	210413
BARNECIELA-j14-exp1-colon_335	12493	294693	92549	31975	1880841	7397	534	26695	382754	59530	4064387	527	31084	73438	10618029	1595	66929	547	1899	168560	14551	302108	31795	1403709	76306	896463	633039	1365609	337198	113131	876	398215	778896	9907	363368	209400	26728	131447	3120218	22461	103	2430718	11641	63595	125173	524153	164702	8261	65915
FRAGILIS-j7-exp1-colon_302	25084	382150	1107769	148454	2232012	6632	432	30104	911207	183662	14140301	787	24708	70638	17788419	151486	82653	1104	2561	300298	21831	383077	35897	998060	84768	937393	715419	1276052	1027577	6220	854	325255	680729	4072	787027	627144	78429	177733	5395611	56403	755	2304308	929476	243489	207722	1068798	506002	688834	127529
ATB-j3-exp1-colon_262	25	210302	20142	6436	2525984	8251	1814	13756	2478400	155475	4921497	10	703	49631	19099434	344481	98	762	1665	3876504	995670	138421	274307	1182867	39156	1044378	229723	786553	617	185	325	302683	650783	22	440624	364	100953	149066	3942564	94342	286	1453788	93532	500476	13577311	1076128	263496	4848328	307252
HIRAE-j3-exp1-colon_266	16	1922714	44425	10817	2494294	8888	8786	25434	5152306	295548	10551466	8	3796	103118	33156448	587693	136	654	2955	676548	1062378	141767	712157	3933063	63139	1416723	460218	1118420	729	115	727	392001	741585	70	437480	1907	48217	417348	3841632	55511	126	1964506	524310	604774	304474	1823263	608686	4963441	76663
FRAGILIS-j14-exp1-colon_329	15337	1161546	34196	5781	1892725	4433	531	6260	352059	62418	1971886	459	32127	176114	13230803	1202	213538	497	2070	553930	7402	381803	14031	442970	57973	852526	221898	2276321	513145	104633	2527	333178	745862	22959	383865	197613	19649	203007	3166663	20849	463204	4225837	9852	68967	106282	533646	114052	7040	105857
ATB-j7-exp1-colon_292	8	237608	17968	4247	2896641	11227	1390	14271	2380194	87606	4485722	5	586	46727	14893538	150893	47	809	2018	2504401	695006	125183	323896	976842	53292	1197687	202482	908626	202	106	401	385704	738537	40	529666	111	55848	212715	2274754	89137	170	1681754	64444	435643	10353376	1415268	261038	4130550	188886
ATB-j14-exp1-colon_313	297	285293	30774	9170	3254562	9474	1470	13794	2155063	152895	5396756	26	1633	52431	14505506	341726	1358	1012	2062	3001286	779842	169846	182528	1304579	62234	1207095	205488	903587	5343	1622	274	380714	799328	122	682383	3897	118374	184498	3976782	102498	1186	1682724	88652	505642	13080736	1414741	288472	5263853	306295
Nacl-j3-exp1-colon_258	18250	493003	100604	6357	2415115	4783	396	14121	561525	22422	2038175	439	38116	90397	21467047	2134	167617	812	2186	445177	10881	324920	11676	510983	63046	1468789	573831	1238651	399888	95038	4195	347432	690696	8880	555815	169605	18900	172276	584008	21775	239305	2226733	11870	50607	127428	654736	150830	13662	69195
Nacl-j3-exp2-colon_200	38313	255121	25446	2322	1730973	3577	475	4140	146945	7151	769363	997	17877	124268	6381344	1407	268197	609	736	681217	6890	480423	7929	237798	55183	575540	183261	1360838	506215	48311	421	284588	630389	20880	520783	447810	13057	106287	909891	5690	548775	2651988	5874	19718	94457	76860	166822	3674	55547
HIRAE-j14-exp1-colon_320	38524	201658	1907560	19517	2051399	5878	464	9363	457895	108319	9814024	52	17029	75098	9731472	2220	51615	507	2030	161237	7718	127430	17581	402071	65382	911554	1197230	821946	443174	8084	247	340716	705408	1366	380596	180018	35107	82044	6800578	29939	314	1540766	13581	136165	102772	563238	728990	8670	107956
ATB-j3-exp2-colon_208	125	129051	5385	2622	2447198	9380	719	4110	1139435	67375	1405368	28	360	13717	4608779	248210	336	658	604	3623544	559821	96932	136787	307365	47838	594649	96921	1354246	3768	76	187	274876	667822	135	291358	3945	19779	77632	2068852	43866	287	2700422	47601	185866	7501535	142543	140353	2935974	170816
ATB-j3-exp1-colon_260	180	156999	17558	6208	2547390	9029	2081	10661	2576487	172919	5202829	20	1042	48704	20167170	388112	856	519	2440	2882127	923780	193453	532463	954693	55691	1141392	260999	1280370	2112	1063	209	338675	665581	103	460322	2252	66263	325722	3856087	98706	3003	2422776	100866	449392	9672908	921336	264919	3928815	242645
MITSUAKI-j3-exp2-colon_220	1621	248992	708163	160777	1788664	8185	609	6415	3478974	118723	5258126	30	6368	166565	11086419	321473	4405	449	689	127126	827993	87594	10925	976744	46115	544688	187740	1015576	62806	1325	524	252583	643995	552	381657	15593	45956	129218	2245358	7041	304	2027441	365144	220378	279401	370792	473233	4213873	73041
HIRAE-j7-exp1-colon_296	80554	233547	44114	3583	2008365	5959	359	7285	266070	38610	2253251	292	27572	71153	21598560	1857	136693	630	2452	202288	11953	228923	20271	619871	92766	831386	566706	1298563	806467	39519	2554	327933	687300	14910	356622	144356	20078	66819	3235248	24608	490622	2435522	8582	61940	149836	524296	435541	25522	206273
ATB-j7-exp2-colon_232	15	141494	17905	7145	2242627	8967	1391	22834	1740526	96691	4133699	3	584	26423	15990154	331403	138	1172	629	3614279	764572	219643	741861	888611	61147	811313	201359	2332264	563	216	191	325640	794225	66	662518	614	242746	261869	3576769	53165	337	4668054	76982	216482	5189146	482366	223586	3484152	284445
FRAGILIS-j3-exp1-colon_272	691	263098	2039601	17353	2116393	3665	941	8499	2376210	115331	2628558	43	12393	67360	13750226	159639	9524	631	1792	193969	21730	88101	6177	556083	34131	1089190	246534	2066288	139482	861	1306	331935	683731	516	325620	8119	42812	63213	2078756	21550	2661	3806155	188666	319220	423183	844694	384615	7011	42593
MITSUAKI-j7-exp2-colon_244	191885	580707	26930	3334	1670277	6310	847	13984	190752	16679	2184122	3387	13453	29613	39497814	7250	264042	1087	952	151053	21631	1471539	13523	790530	53536	502599	543813	1381454	1849754	23927	1171	251486	688886	29289	814370	1511583	25697	158287	3477929	5545	180867	2672368	278853	47642	191456	144516	145217	26550	160374
BARNECIELA-j7-exp1-colon_308	19997	840598	36180	4868	2329737	5603	889	7518	281300	31462	1692684	785	28765	52808	21577561	1046	182960	1225	2279	878520	11103	623461	15831	393701	66492	917162	547885	1212590	663405	85829	157	368972	807383	26859	685055	540858	20322	204276	3510756	15666	230186	2194788	37673	185052	128241	485384	205247	9610	186302
BURKO-j3-exp2-colon_214	985	274832	2705355	37164	2065908	9319	964	14870	4505907	194225	5659618	20	8795	256687	11965961	577969	2898	936	790	391343	1069243	240893	11586	822768	57978	667164	239341	1528947	54158	2842	894	264583	631533	199	533345	13578	49549	172210	2416160	40200	473	3097494	746700	285634	1288943	547855	625008	48242	79267
Nacl-j7-exp1-colon_288	7003	442545	37335	1917	2095804	2877	414	6148	400339	10831	1154599	178	12331	54065	8966584	658	102631	786	1785	416245	8457	270338	5776	237775	60327	1020228	221271	2152529	160053	37888	1873	382921	728313	7803	465051	64310	21532	73557	715970	14935	283794	3890366	18022	58023	70411	352990	131740	4644	79655
ATB-j14-exp2-colon_251	49	111376	15729	5183	1131099	9770	533	9941	1029462	98064	2358336	9	547	19581	4464790	265633	289	836	583	2164023	541906	113871	61255	523566	47036	496443	109348	3136130	1243	199	372	250168	651504	29	550082	1076	66534	43361	1652984	34514	645	6234734	49703	187817	7586765	259174	139639	3255719	171931
FRAGILIS-j3-exp1-colon_276	3199	408431	1025892	9734	1934769	4463	940	9909	4143879	201258	2612028	73	15413	107513	14201622	214629	39430	495	2238	232875	14860	251862	8017	513426	52013	1104536	456447	1224981	410139	7139	1618	362210	687169	2037	296845	39783	24098	97767	2695739	20411	643	2174482	15385	380452	720249	643062	625631	25474	107029
Nacl-j3-exp2-colon_201	1726	324907	23470	2627	811529	5410	370	4203	172645	9874	947839	62	33911	46649	6235304	989	60414	755	1163	890106	9026	133219	9618	223289	82497	563317	338648	2769154	93815	105734	1383	285061	632549	5497	397361	22934	5460	119884	107901	5121	162762	5543270	7594	25720	97148	104920	224203	12361	71993
Nacl-j7-exp2-colon_227	46330	774194	29088	1561	390705	5662	264	3530	176463	7514	907370	1144	24912	112453	5839974	601	277087	831	1239	1418441	12849	422557	8724	179033	88474	538340	326010	3207780	775253	57311	740	283038	646731	36476	473976	683082	2603	145037	170144	7201	700739	6305199	9119	31598	192361	109991	123232	9565	127286
ATB-j14-exp1-colon_318	54	220204	43620	3661	2346683	6671	530	18473	1540735	78084	3806936	13	746	41350	15128236	93509	723	956	2107	1785998	434124	304868	126071	816529	61325	1254797	154667	1889401	2366	539	295	365489	772864	21	707422	609	201876	117945	4441849	56652	1837	3454216	52307	289311	7995977	917004	176484	3035825	378510
MITSUAKI-j3-exp2-colon_222	5696	282532	48568	29771	2153794	4973	361	5235	1951907	103075	3672276	311	17111	28349	7721361	223437	36278	566	775	882825	332948	52174	4897	176708	19784	761585	104822	2088068	433057	804	1058	318674	763316	3649	257501	278153	23175	70491	1733051	7903	2131	4108677	719527	144852	860841	164182	365504	2182229	342434
BURKO-j14-exp2-colon_257	9780	396278	57415	19775	2821081	5375	545	24892	311783	137638	3809918	85	20010	47152	15777586	281353	28328	902	812	204301	9080	965754	17924	810605	44360	536318	703835	1984467	315269	27668	871	256626	665575	14873	641309	217564	110766	150193	3395219	61460	599	3844781	17480	127733	72415	431958	259595	6471	162731
ATB-j3-exp2-colon_210	193	124528	12243	5317	2670214	9744	1202	13498	2013770	94338	3366638	22	1283	34374	7064838	302950	2831	781	742	2511897	827768	227232	232931	705670	56665	693911	186514	1496491	6195	2676	269	289073	760633	80	661747	1572	123303	128669	4006852	74633	3993	2922506	70455	280249	10095877	437630	244308	4340053	244138
MITSUAKI-j14-exp2-colon_263	2280	222714	29652	29264	1660140	4079	347	15550	298975	52796	1848711	105	21962	32203	6144242	1674	116708	815	832	1584695	9032	1014818	21791	652755	97016	531784	181147	2005755	264388	97474	826	271396	714871	9810	425355	30099	14857	55962	3659481	6703	409734	3879452	6997	71485	104699	138115	307362	14204	103504
BARNECIELA-j14-exp1-colon_333	9313	505078	55634	5346	1495632	4739	304	6624	355391	62729	1615005	218	25225	48820	6345191	1448	48489	537	4573	361208	10548	331122	9546	373334	55702	921358	252687	1668050	66273	58661	586	364188	746680	5213	368532	104015	32828	53147	3531919	27114	7325	3182288	9191	81434	117313	464569	116668	14422	120583
BURKO-j3-exp2-colon_216	3834	863355	203367	20458	1476754	9930	281	22462	1242530	111402	4492801	44	15611	428912	18403754	206134	11239	903	865	603845	236061	350129	8850	605131	63713	515544	337090	2934869	180314	21378	2315	260282	662845	594	769700	35512	110404	99590	2877921	11964	44184	5880808	13714	52962	2104130	814060	343232	58913	255397
BURKO-j7-exp2-colon_238	826	672489	34406	1452	1698764	5759	319	2155	120711	21611	519531	126	26457	20085	6787797	1102	19420	582	1043	115618	6457	215964	5514	228747	39568	683528	243999	1419708	63628	76892	2753	322499	800667	5020	383372	62756	3015	91441	1207685	4422	152663	2844740	8694	23735	211555	61488	229071	11159	244536
BARNECIELA-j3-exp1-colon_282	5197	2852645	24824	15952	2638000	4361	3442	8962	929226	184984	8581241	236	4791	78322	10595787	237149	14166	792	2913	165108	16870	365053	13517	243454	64505	1183753	168726	1919057	157879	2602	936	373205	730614	955	386569	126914	12570	267995	5763566	172281	142	3571662	674136	413966	456614	527232	411255	35495	140272
MITSUAKI-j7-exp2-colon_243	35703	210781	21889	1660	2103933	8735	251	4985	258942	21558	567320	686	20704	33898	9271022	2308	210959	934	1860	317559	14474	1426224	8501	138504	58865	599248	441028	1603738	945648	40925	2192	288000	699576	21151	702778	360938	5863	92123	2605252	6296	571814	3108017	19590	76862	208885	104285	299701	29809	502859
HIRAE-j7-exp1-colon_300	72940	201360	64708	4355	2734979	7400	873	38595	1178044	226374	3221031	824	19702	114415	27675329	462797	99966	1111	1841	92726	146841	486687	34361	1674811	46641	832772	590343	1140284	865563	22622	1567	359888	679212	6956	941608	346081	64923	186229	5802429	45587	434493	2142921	640600	69168	102502	926032	297587	42553	79245
Nacl-j7-exp2-colon_226	34402	677763	94721	4062	2108973	7408	589	16181	1131757	34678	1746433	638	23853	211838	18697902	3817	315238	1296	1395	1205741	22740	1072411	14502	514469	119089	661135	519338	1577321	484504	57903	1663	334898	747874	32822	951086	334004	30423	345284	2101007	11688	759438	3175858	39294	41852	266188	242856	387435	14277	188911
BURKO-j3-exp2-colon_213	4851	295616	2292121	30396	2016196	11552	1261	9268	6191828	340826	6191514	138	7197	415484	10264439	1285483	24070	631	1245	412142	1736701	604013	11799	497930	86456	521825	266589	1011765	323544	4633	2700	269501	708316	1662	591550	97521	44196	256418	6087162	15468	887	1942848	1297892	412379	2510228	404789	722746	139911	191733
HIRAE-j3-exp1-colon_270	21	360511	16303	2262	2767237	3558	1817	14440	1606984	74262	4130936	4	934	65693	15200757	59832	66	1054	1280	185196	212497	198587	96189	862616	25647	1090229	125417	2212641	551	125	868	367358	696617	27	573324	3401	54794	97082	3643188	37069	146	4024095	187186	153153	113289	606568	213029	996961	17777
MITSUAKI-j7-exp2-colon_245	110602	213093	32131	6521	1185655	76170	583	17208	385136	17697	2419895	2073	16865	32279	10853453	1376	206083	937	2443	257457	14270	556903	8374	626273	77685	505083	583269	2599925	1609514	19362	1554	258735	673142	16784	836665	1385513	52596	44065	2562938	10785	691273	5169429	27828	51932	117887	316317	202047	20161	904709
Nacl-j3-exp2-colon_203	124833	153874	16034	5131	2779584	6209	372	3922	349200	134708	3262987	3242	5807	35955	20512896	160806	143828	449	758	363385	389106	113324	55600	664384	51834	663145	259689	2120828	316457	11054	1926	295922	699588	53819	227446	1478660	33327	198095	628666	49860	44758	4126385	286585	71759	617018	309385	151071	1388259	972513
FRAGILIS-j14-exp1-colon_326	15819	1072518	39249	8004	1422057	5883	608	13502	421476	39446	3211393	324	40801	123196	36107493	1412	159547	893	2761	614257	10474	565350	38318	1075652	111729	1117616	483601	2984328	485891	194293	3965	394734	817600	14029	648250	163454	22244	280228	2418623	38433	346649	5398736	11656	51733	147909	370844	120183	8721	111141
ATB-j3-exp2-colon_207	11	107234	5509	5864	2765640	6861	371	4768	949214	83214	1722075	4	507	17438	5395571	305264	51	639	519	1197294	485556	131921	87807	310013	25180	604023	90768	1295686	192	113	394	294101	678920	33	360876	280	53836	72131	2734467	32377	157	2580676	46997	178492	8033586	200521	110410	2432176	284725
BARNECIELA-j3-exp1-colon_278	3238	3196442	32630	6805	2671598	4539	3116	34644	1058838	128049	6280173	136	11572	79040	18438538	60613	2882	1363	2339	87624	20887	413566	9182	726712	51023	1136031	232736	1499041	12969	2653	1409	330194	661933	335	825867	67955	29940	352974	5046511	40352	168	2641642	389306	269189	423989	791756	451825	19822	88060
MITSUAKI-j14-exp2-colon_261	10527	112980	52364	55399	1813643	5779	415	18145	344677	59526	4704288	151	26690	48775	11712514	1295	237886	836	954	229175	11876	287391	41365	1398574	94108	518672	310059	2472385	342189	94760	141	269259	672102	14797	590535	89294	19884	82354	2180342	10873	603861	4752130	9794	25419	78620	156193	90637	12374	70027
MITSUAKI-j3-exp2-colon_219	4337	249656	359595	91659	2239249	5927	567	10027	3816871	110003	4419469	91	6087	58602	10613857	279737	24233	1048	1055	276501	930481	329212	9454	543917	48893	656019	182667	1350810	248827	4885	1196	281500	711702	3042	521992	99978	47709	144131	4797120	9228	6285	2650998	380172	203931	1421972	484953	500922	4122186	118734
FRAGILIS-j7-exp1-colon_304	8506	468850	32263	2844	1968186	5000	441	9471	363204	40219	1459576	295	21031	101297	13545344	1888	163237	1031	5981	797042	14706	539086	12242	150043	83941	946673	455389	1270983	884868	36236	1484	369302	775070	3258	637336	150986	24369	40497	661007	23015	918678	2358159	228144	66151	94495	456956	490480	20639	124340
ATB-j7-exp2-colon_230	37	93464	6542	5384	2957595	12532	476	7659	1333606	78635	2532499	4	561	26050	6389082	228161	603	512	986	3350364	621086	89912	114622	602915	54899	781403	132174	1039932	2158	640	215	302245	764212	66	324156	1321	25363	102444	1524280	44265	4427	1993480	56918	249522	9154538	375758	174963	3314487	271481
BURKO-j7-exp2-colon_237	1738	444218	17498	8442	1305290	7929	911	11486	171326	74074	1365790	251	27372	24951	5671736	1498	18360	495	1278	383355	9826	146596	26645	388288	79747	602673	415809	2540432	125206	96223	2157	285972	739275	7877	399403	130830	11752	55851	2832611	10157	18813	5114464	19897	75586	114230	162125	267293	11746	117528
BARNECIELA-j7-exp1-colon_312	13750	409982	75714	5720	2978885	5480	809	11434	921152	37841	3409049	1315	36919	131412	18000028	630	284675	788	2609	403601	12415	122442	56004	782350	100573	865331	1006270	1404540	621836	171988	3091	404196	846209	6392	463999	346609	5802	245798	2496344	26669	128460	2553922	13692	42087	147893	365493	464628	18445	70458
BURKO-j7-exp2-colon_236	1499	847262	109964	11777	1282299	5969	686	7133	210508	33966	2100009	83	19796	30829	8487393	35083	23443	776	965	386149	8302	232921	22534	1124677	69319	563961	520077	2473013	80847	74090	1962	293964	723748	3062	395778	66770	5309	87815	1614154	12676	138189	4831739	9748	28920	85258	154723	264641	17347	55807
ATB-j7-exp2-colon_231	56	103284	7115	6765	2767261	9388	742	6639	1330542	81023	2398559	6	560	21865	5464383	305400	970	725	574	7234118	714316	94815	139653	549978	38499	718786	131703	1491466	2368	386	209	299473	761339	84	330512	1139	43264	90532	1940985	51963	2510	2913415	60144	267174	7994669	312741	168372	3482413	238878
Nacl-j7-exp1-colon_284	37032	634401	93911	2953	1440659	4394	772	10018	459598	32268	1822819	720	30329	122301	11141308	1765	205138	872	2859	260246	17622	613425	6355	477944	77813	982629	539130	3051332	310254	59149	1716	373454	717561	23980	647257	325251	11637	172755	891547	32985	448073	5367879	20132	45154	111882	339490	187404	9958	97671
Nacl-j7-exp2-colon_224	3754	2081022	45033	1832	1345805	6027	NA	5725	554889	15207	1057954	144	24923	138896	15452210	1718	149774	754	1077	982766	14454	389286	9211	307265	76172	728298	611656	3273799	272942	56569	3527	355167	788252	26107	548689	80846	4811	325126	542224	8032	361490	6424494	47926	30315	200090	127207	335291	9234	161938
MITSUAKI-j14-exp2-colon_262	5627	203113	19460	10630	2256368	5339	208	12991	271606	18370	1455728	257	18762	24501	6762232	1753	173474	828	1336	389251	9571	612214	12327	528966	89039	532134	166503	2255083	240660	64519	2233	263463	713228	22221	657255	155036	32945	32475	5427943	7468	726795	4472564	7811	44283	60990	134487	68534	6693	135569
BARNECIELA-j14-exp1-colon_334	25614	652985	87607	11179	1827630	6415	303	12013	623406	1727252	2757380	823	32262	146212	12365055	1435	89432	1322	3544	316700	15171	1314969	18054	588702	128175	983955	738889	906338	108702	114915	2547	384780	779913	26741	684523	257030	27895	143021	4799758	39652	724	1665268	11966	106758	152451	333088	162284	9983	253536
ATB-j7-exp2-colon_233	100	111291	10377	4988	2811102	10148	743	13126	1137251	83755	2981642	29	540	32100	9400537	233582	1537	871	916	23914796	664834	129844	65842	723536	50842	835863	129334	1343557	14074	128	293	315206	793001	462	645857	5244	90326	70092	2131093	78108	222	2615231	73697	370922	22521561	413594	148203	3376590	963909
BURKO-j14-exp2-colon_256	16789	148819	62078	15082	1276019	5886	481	16946	327328	142449	3769629	109	11831	50102	4349642	310613	40268	1188	943	314284	9785	2181343	15373	337218	66393	517912	556573	2875987	483203	19716	1211	282746	689014	6445	867886	242041	64751	91910	3376205	25124	203	5824504	9756	184740	81679	158225	300536	7618	269347
BURKO-j3-exp2-colon_212	547	469199	2278496	17788	1758488	8957	1175	11376	4389155	127270	7323674	13	5703	97409	9987858	312389	4619	808	1845	143065	1061789	401904	13130	415706	83986	620676	233821	2972174	61470	704	902	278431	735066	1415	609309	9219	58492	131672	3312992	40805	471	5856326	686362	310617	1662695	590804	660898	78380	109694
ATB-j14-exp2-colon_250	7	124188	11046	8918	2876255	11600	857	9844	1527880	124635	3157177	7	583	26736	9319925	493889	45	718	766	2990448	900084	157199	146854	794473	46384	533829	141420	1296736	198	131	205	264685	681146	21	552227	148	104900	134513	3040553	50502	125	2488378	88546	287157	11427716	336407	194197	4009785	425241
ATB-j3-exp1-colon_264	144	170076	20110	2968	2705988	5965	1377	7375	1437394	97443	3216336	47	934	55646	9407939	163690	2202	703	2626	9315844	700478	216283	104111	472940	56423	1162284	142243	1020070	9366	1471	335	372812	755757	279	352977	5469	25211	146658	2655151	124355	3508	1921195	67322	376760	23389584	681289	167446	4032749	377455
Nacl-j3-exp2-colon_202	17461	217594	30127	1008	2083851	3525	415	1722	188294	7527	786154	540	15229	67389	7164557	1829	148599	566	741	424403	10133	213036	4129	106417	28161	696294	164170	2231294	288617	31381	653	293228	697499	15570	303400	362559	8492	74931	313497	5747	155560	4469927	12044	28166	92839	113677	76665	8752	109042
Nacl-j7-exp2-colon_225	21595	939987	60529	2127	2202385	3201	231	4086	313745	10405	751407	417	10673	37038	12129127	1700	180760	552	772	997982	8401	339588	7365	216908	31590	765499	194991	2251652	295063	42787	779	319639	736640	24510	398622	264911	12238	106041	519863	6081	294597	4513508	21013	24555	231098	118728	99888	7060	250217
HIRAE-j14-exp1-colon_322	30698	505831	27334	2094	2081952	3047	627	6827	318477	101216	1370513	439	18504	92854	11133829	85186	128845	711	3337	395530	11175	312939	10413	210955	71629	919631	392295	1197218	488076	52361	1020	344918	748480	9785	387894	250852	12736	64872	1022269	58977	2716	2125879	10787	84736	112600	369195	342630	5914	113411
MITSUAKI-j3-exp2-colon_218	437	154441	415390	119601	2556540	5480	234	7230	2292831	173359	3126138	6	3542	51036	5973712	450695	978	642	959	97799	765889	184443	5405	293002	24658	720537	88373	1884315	14639	373	471	306757	765448	262	358795	4524	53196	67230	2687469	7836	273	3805175	492732	191024	1447672	368786	299294	3161333	67412
ATB-j3-exp2-colon_206	112	91906	6214	9981	2763473	15919	691	7671	889557	172747	2351781	55	733	30439	6135232	889753	4457	737	683	17847167	1113075	279012	116576	404274	42915	639900	77365	1272131	28758	458	287	275096	699426	994	444067	20588	46832	100763	2959430	108945	1232	2600658	100510	420787	21749470	224079	98613	4814838	314689
BURKO-j7-exp2-colon_240	6480	917016	59615	21372	2157152	8124	1249	14051	491456	52529	2846306	749	22874	48159	20656206	29539	92479	963	1580	486565	15060	669008	36149	1602194	108751	563529	2507993	1695205	465925	64022	1387	274173	726304	6551	670772	334169	20047	237092	5029074	132992	277969	3244328	31385	92979	233006	287289	543128	10783	267472
BURKO-j14-exp2-colon_255	14845	170269	69394	36988	2510331	6799	505	20493	330936	247158	5973814	125	14423	53945	6926695	978735	39586	1000	1128	671348	10748	1279077	24397	429571	69683	518704	1188537	1632646	375614	17956	646	272617	649384	10251	687447	202913	74111	124875	5544430	31369	148	3233927	12013	140684	90687	255478	456143	8994	168548
ATB-j14-exp2-colon_248	7	75802	4010	1518	3120553	6314	420	3453	786736	54723	1534495	2	492	20460	4002598	151788	76	592	562	2556024	542368	71194	52033	300505	34789	506909	66824	1261162	479	241	345	273205	693587	12	271035	316	15042	51256	1201622	36025	210	2389896	49193	202539	10158576	204472	109467	3242433	140768
Nacl-j3-exp3-colon_201	5672	220548	23593	6491	999574	2710	405	7045	178526	9615	888579	312	22243	253149	5301824	911	216562	944	952	2354316	9985	1369077	12017	122333	125959	582595	216998	2240030	374363	64095	744	368572	701547	17549	881949	98431	21382	35405	830691	12475	569722	4044919	8558	65153	174832	196545	70296	6277	620859
FECES-j3-exp3-colon_214	315	224358	7566921	31752	926337	26281	723	22634	2286888	178106	4605866	3	3846	66964	4308455	369216	3921	590	950	1046369	1178969	338516	12302	176464	127714	915396	183377	2520810	69041	193	4011	402505	851710	367	488421	2059	59589	74088	2029885	43897	189	4950691	488319	524893	250018	408739	466109	5577216	124162
MITSUAKI-j7-exp2-colon_242	58722	178059	93045	39595	1628721	7863	2345	18365	610486	68747	3398508	240	24093	122755	15339052	1110	461923	1118	4003	684277	20590	1250817	27788	464207	95422	584038	966510	1528999	1298073	106107	1227	290879	734781	19816	669735	145897	14429	114501	4152889	15006	896519	2955544	18310	98525	254680	256517	673975	30127	376388
ATB-j14-exp2-colon_249	69	134059	15001	9139	2977342	9578	897	30632	2677076	182267	4975085	6	517	42209	16824895	574782	310	968	860	4400233	845957	277122	262816	1288749	52266	559209	240856	1459365	1509	274	299	266049	692744	23	881958	753	367323	193226	5555321	57056	833	2884791	107229	310281	8923545	689535	281001	3932359	306082
AKKERMANSIA-j14-exp3-colon_261	14954	514740	21857	2775	1557342	4241	564	5956	180569	9458	598494	296	24584	108590	7110662	1557	101237	547	515	1002778	7289	770696	5459	161894	74441	671251	166510	1910119	231232	86136	868	295760	689869	17567	573999	185076	20777	43416	843315	6306	373281	3626124	7058	51869	129833	112580	112292	5453	210887
BURKO-j14-exp2-colon_254	4475	191409	135271	91087	2436080	9338	329	24881	640240	244611	8290594	69	21075	58575	7426461	816986	10468	849	14504	350415	11461	294106	27121	628615	99423	706905	856498	2385732	159291	33333	2500	277124	681568	4022	502011	93645	50339	95366	3933116	77953	273	4828606	15447	383769	138582	541413	631814	11706	275956
Nacl-j7-exp3-colon_225	984	325242	26003	3976	1294837	3010	862	7152	201717	13288	825205	83	23058	204468	7375455	1824	71390	1036	899	1320527	9371	1275168	8384	154980	129677	888765	191779	2823893	128013	54163	422	416465	787505	28300	851262	12501	27518	55346	1315020	9983	521679	5266247	11728	58971	296632	138799	74625	10228	625516
MITSUAKI-j14-exp2-colon_260	839	121892	60473	42459	2441552	5204	585	22299	477804	58713	3750373	54	24220	43637	10451536	2639	46711	681	951	192886	7514	353889	27584	1284747	94291	559960	309466	2358516	101812	89211	1902	282832	708613	7206	483414	18868	21851	74092	2328543	9710	331210	4495067	7520	31496	53812	163671	112066	6834	50066
ATB-j3-exp3-colon_207	9	167455	30905	2971	2539325	10627	648	26808	1602473	98410	3344723	7	609	32219	21274467	289026	41	1265	503	2202425	753114	680441	117763	1139426	27842	843861	180996	1820714	62	176	432	363499	837182	24	1004409	67	371168	82889	11432186	36901	136	3528059	79903	114549	10079163	581712	204108	5376434	169662
ATB-j3-exp2-colon_209	19	108491	6902	4546	2981624	9211	883	9044	1773799	108045	3248808	13	534	34822	5141159	307135	131	968	1084	4599137	982035	158085	139513	631327	69537	740227	140192	1450762	859	158	271	345673	897372	33	434089	1553	41321	114994	2837210	79713	176	2778327	78736	335899	14082676	383446	215403	4647115	878970
FECES-j7-exp3-colon_238	21146	810892	3217162	46558	1621052	13173	864	33403	923366	79454	10009342	133	18399	81556	12579522	12755	62886	1005	977	1157331	38325	1293550	21855	536038	144890	632711	784406	1498774	500144	2803	1218	298562	659632	3844	947824	87997	80239	200453	9984631	21220	121	2883686	1312422	294578	346789	758140	669411	34381	1094259
BURKO-j7-exp2-colon_235	1925	482899	54537	7113	1794687	5094	639	11573	244913	64198	2138691	97	12728	34964	23899242	3725	40581	621	1152	379188	12521	440823	23905	675933	70539	657915	522671	1681899	140599	43318	3258	319091	763479	4272	550170	67958	16923	211966	3073618	11463	311416	3245742	12816	43640	64884	201337	357481	14479	125640
AKKERMANSIA-j3-exp3-colon_220	638	224457	3083363	31992	1873485	7437	538	14362	3014358	127670	6379250	14	6809	121626	8682799	307266	9486	642	753	1588929	1000195	326950	12186	687709	27913	753531	152912	1324683	127523	114	823	389184	757219	1155	421671	10702	182121	84721	3665917	63574	43	2580873	609997	151737	1806545	758725	377721	6389434	133520
ATB-j7-exp2-colon_234	11	87913	4478	2352	2868458	4562	323	7699	926944	66855	1738715	12	470	22946	5673735	195931	78	603	783	3341446	538364	196555	43112	286023	31656	885682	72581	1816187	327	133	236	333000	785424	9	454721	455	38529	39767	2143912	45426	272	3520711	47487	235886	9409541	257659	124694	2613671	87302
ATB-j14-exp3-colon_248	4	116479	14981	4676	2220095	9225	1759	6651	2933401	99318	4077311	10	741	19835	8370494	310026	36	410	554	2874164	916555	66313	677842	995823	65729	619323	230178	1457626	163	95	324	299183	707418	27	310349	72	392115	331989	1607596	47312	54	2773727	80671	234878	14792271	518216	308487	5782097	465709
Nacl-j7-exp2-colon_223	9661	223513	29446	1661	625548	5997	229	3634	169411	7892	873761	224	27167	45923	3136607	990	167780	657	1830	1347993	12413	118428	6852	110338	102031	642096	293135	3386366	165845	59026	860	313023	705746	11572	470759	140907	4136	80498	30140	7332	334652	6629781	12042	46792	105082	124292	256306	9744	105277
FECES-j14-exp3-colon_257	2893	801067	91502	5611	2200438	3485	562	19391	494841	19589	1610273	112	23255	294274	16405623	3442	36556	1212	926	1765413	21314	1241119	19480	331189	85974	589903	327458	1583827	86957	40099	6645	300520	699655	13804	895664	53683	55494	128325	4105219	8865	197922	3004327	33230	84018	171277	312483	173379	14321	241571
BURKO-j3-exp2-colon_211	3939	284098	2882635	35077	2415179	14348	2657	11002	5657123	225458	6853886	77	7082	334042	8909064	517912	10621	1154	1779	891160	361064	352172	13244	1099195	85587	674589	335046	1840987	183235	20114	1806	299647	782759	1543	605910	67417	34820	193248	3374212	42296	24731	3573806	1351414	148070	392298	892295	871022	77479	134641
Nacl-j3-exp2-colon_199	21099	352314	67922	5695	1482617	4642	523	15516	422998	19396	2149109	648	16995	202625	14502350	2706	234384	774	869	587700	7882	427709	9571	489321	31670	707986	304894	4472122	330389	65138	997	340941	752167	12858	572625	219901	60542	77696	1443287	9860	418512	8959451	17305	23944	98455	240816	127375	11486	170350
Nacl-j3-exp3-colon_203	2228	683046	58224	2224	1495229	4382	172	10114	608140	14198	937612	122	32866	197670	14055479	3449	62277	1055	1340	3829193	16418	1285905	8562	135199	44847	761104	279734	3025045	127889	77045	4782	395808	836241	3862	708529	40902	24667	95490	1412679	7926	307069	5788697	13968	51773	213343	210856	117857	21475	476626
ATB-j3-exp2-colon_205	32	68222	10339	3648	2970891	7857	526	6242	1379663	76473	2135839	4	646	24277	5385621	236739	249	505	976	1932138	583612	91435	103655	342573	22052	679107	111937	1426556	2303	306	175	296612	720323	28	250860	941	30508	85642	2514032	54347	257	2842027	62225	198283	7017586	275823	154722	3143341	139193
AKKERMANSIA-j7-exp3-colon_241	7052	272702	953689	49831	1440773	6324	612	33316	2095142	51030	7717961	62	19339	36933	14997745	13814	40643	1078	1179	855063	16632	574837	14537	427849	104208	656491	1509669	2175018	440588	11025	4305	316277	730665	5195	762866	128091	58368	89644	6070932	10685	370	4078590	14402	199350	251982	494901	483273	16458	365718
MITSUAKI-j3-exp2-colon_217	5727	250647	111107	39313	2411584	5405	604	8332	4130204	215771	3675782	89	5781	44309	16367583	746263	36586	1058	1342	426998	1211870	784831	6133	186670	39835	857727	159168	1796693	424145	629	587	300586	681761	5105	414867	95805	17613	163539	3819840	10220	170	3549378	800156	269538	1898638	232722	428089	4319340	325852
FECES-j7-exp3-colon_235	5130	844274	2034033	29918	1784013	7432	618	14193	566220	52868	6734518	57	14739	39870	7697490	12051	21254	588	1076	932915	26062	568660	12006	372720	112616	729839	444350	2314388	243747	2309	1934	366853	818429	2617	585354	26922	49708	101906	3749531	19724	323	4509336	830211	225766	261838	257092	409977	45751	383110
ATB-j3-exp3-colon_206	6	116848	16614	7128	2163498	16716	1173	17634	2317179	102224	4575452	3	600	27295	11299036	261647	76	859	1060	2180305	977228	386137	394541	1050665	87538	849093	211911	1592495	261	185	146	403685	899499	12	752506	95	122252	245966	4423623	70065	53	3109979	78373	276480	10403763	688111	281309	6581163	367417
ATB-j7-exp2-colon_229	12	77471	8368	8280	2706482	10884	889	6138	1154567	117670	2886365	2	572	26766	6106253	385732	158	488	1065	9394378	892246	125397	82758	588774	42466	645784	88535	1488014	857	111	245	288104	754147	20	362972	988	74157	95708	1807455	74495	179	2907298	75832	326455	11980570	352109	122056	4348797	516151
AKKERMANSIA-j14-exp3-colon_263	7398	879680	47587	5499	1281063	4754	558	7605	475606	15396	1131569	322	40815	167250	10714283	4564	48166	750	1446	1806884	10003	283292	17684	264486	93056	754508	507178	1839665	103826	106068	4142	320797	744921	11578	465831	123382	12085	138309	346666	17164	97613	3437075	12689	115253	213593	213926	220597	14608	263090
BURKO-j14-exp2-colon_253	58819	323122	88615	153446	2661958	15936	1485	10200	1807635	200588	5262472	239	47909	47595	156422041	639850	27809	1077	1598	23500863	60679	3698583	61240	301043	133161	672122	1142556	1038906	380985	14257	945	428958	717949	6833	684815	33665	43107	393321	3198163	153927	56	2039049	105265	4933841	112738	1017957	1632427	29569	533200
Nacl-j7-exp3-colon_224	1817	119539	18704	2739	1160370	4570	530	4643	207263	11371	773328	120	29698	154217	4746830	1617	41911	791	1225	585954	7417	818336	4667	228839	77797	959035	125784	3651761	57258	64332	4660	451711	870645	16051	760135	26319	8659	72422	382807	8211	506645	6817364	6978	50220	122380	147680	90874	6492	144781
Nacl-j3-exp2-colon_204	10188	441095	28281	1957	2568409	3958	276	5765	323864	14303	1220273	227	17479	91905	9280714	2015	120649	721	1081	627382	8115	527156	7116	315373	48569	613973	241221	1813644	196359	52592	888	306054	775840	10692	560139	96985	30565	94129	1038535	8007	406931	3421212	8097	35753	74573	201999	87859	6545	61440
FECES-j3-exp3-colon_212	209	337500	3112843	32521	2322333	8165	940	38594	2103164	116316	5604633	19	4215	78842	10851731	234268	12939	850	1150	612611	864958	504231	15429	339834	112535	961865	278520	1777733	188540	336	529	420056	888266	1724	777586	7260	104762	137290	4046700	22551	688	3412168	499475	404442	404280	864236	547137	4990516	120156
ATB-j14-exp2-colon_252	32	72847	5160	1483	2941145	9091	283	2908	660821	59181	1288908	5	566	17578	2848704	154521	143	532	722	3033991	510224	105333	26894	269142	21150	500699	47998	1133439	743	201	151	261153	711732	11	253402	452	13397	32328	1211577	45521	300	2202664	56506	224034	9902743	182273	91943	2557042	123744
AKKERMANSIA-j3-exp3-colon_218	335	185025	5078198	36385	2006644	15079	748	21347	3622730	194249	8939608	22	3499	146847	13087032	486378	10392	1004	1126	1659500	1407162	568309	12442	650178	82551	766250	190571	1636349	186139	140	3442	391190	759058	1043	581666	2453	344352	82907	4089501	61301	77	3139492	668432	458054	2075751	556166	562057	7073878	137437
MITSUAKI-j14-exp2-colon_259	4396	162953	51254	64560	2385532	3534	1024	13447	586347	24339	2221305	162	12666	43148	4663408	800	189215	726	1435	764808	9680	712696	11817	231588	75824	557337	228280	1591958	275281	69722	4207	343482	724544	23135	620819	43120	17251	40859	5261245	12519	836776	3177583	9804	56950	65989	111570	96043	7171	142108
ATB-j7-exp3-colon_231	5	211177	56713	4232	2845637	7527	904	41157	1982369	114236	5452595	2	585	34849	24804574	245981	55	1608	653	2899660	842901	648485	154663	1626797	55908	974019	220610	772411	102	127	362	380829	796389	24	1175706	82	428422	110201	11905527	43316	73	1477043	75164	230360	12441558	838331	260063	6120236	321127
ATB-j7-exp3-colon_230	148	111698	11645	7084	2613266	11819	1529	9367	3258818	136354	5031152	8	953	28748	10889597	473390	1250	698	761	2744161	1466364	230401	836061	1273219	93991	1096164	267554	882536	2997	769	833	442679	896660	125	562112	2357	79575	413197	4204224	61052	2389	1716679	133668	334013	12500458	594753	361062	6914874	1179315
MITSUAKI-j3-exp2-colon_221	2793	269510	305265	64686	2103541	7074	406	14846	3638359	162270	6118254	74	6284	82516	19110737	391552	9599	1145	1570	328449	1068910	745716	7719	738277	85116	663865	205339	1746462	212507	1917	1192	402227	782276	2032	754301	98260	163397	208418	4806113	14855	1536	3337919	484675	358717	2050370	681343	509159	4563356	192909
Nacl-j3-exp3-colon_202	2258	186980	118792	55946	484457	3793	1002	15089	405476	33811	3430022	174	32638	53357	9457315	1499	70984	1183	1468	1482148	20904	1166963	11880	242443	64025	655206	708132	3793473	91024	220451	137	423148	762825	16593	711355	15244	34856	115435	976929	16533	514969	6874491	16858	52387	524630	192534	145831	14385	983492
BURKO-j14-exp2-colon_258	8979	267828	62896	30776	2922906	7676	498	14871	376428	281301	5021010	51	22872	48307	8223799	896711	28123	856	2792	514601	10067	372065	13643	371046	81470	650133	622194	1505328	330374	26369	675	287180	730093	14397	442123	250960	30016	101304	3229496	49136	1186	2845191	13714	200314	77923	309338	505990	8906	373754
AKKERMANSIA-j14-exp3-colon_259	2243	334699	28660	3620	399358	6647	318	4916	200959	9971	939634	137	36170	178621	3078938	905	51995	687	1234	3333621	10396	377050	5998	143018	67863	666971	210645	3810908	145340	118599	1277	352398	735633	6469	413918	71724	4510	41783	231393	8071	273335	7254579	6726	60535	206375	127675	56946	23662	242136
MITSUAKI-j7-exp2-colon_246	100777	117442	24824	32433	1739426	32608	320	8863	391402	23367	3001418	1554	16867	52337	12060257	2301	209742	737	1816	379850	17823	281882	14157	559881	70311	558743	844404	1920322	1359732	59408	2672	303467	720059	11893	554602	732076	13422	50388	2408226	12450	869955	3767191	12327	76317	156117	262898	348337	26289	225095
BURKO-j7-exp2-colon_239	3044	2194022	63620	10600	2485328	7423	892	7597	314764	56657	2228139	93	25596	35237	13837032	114901	29243	720	2095	472340	12472	249457	20619	637981	92124	634225	1128737	2649680	214192	64127	2138	310691	772400	3194	449814	84343	11279	141922	2485109	53460	182187	5155940	10081	75830	108488	236583	446502	15864	178634
ATB-j3-exp3-colon_209	21	102499	24422	7606	2359680	11031	1524	7174	2182622	225305	4000779	5	530	28499	11133118	837518	207	484	843	2662082	1328166	74316	553167	907177	49380	971135	213052	1321008	556	186	231	412940	833596	29	293251	223	45014	350978	2655247	57933	335	2483829	140647	375497	9753746	670254	270120	6838578	524486
Nacl-j7-exp2-colon_228	10818	225114	42295	3066	2108488	4977	294	6603	455025	21264	1435348	240	26145	303497	11975684	1759	276544	856	1752	721428	11681	723076	10002	372013	53860	704662	317111	1959120	362377	82504	812	341881	798896	23858	592458	137600	7294	229227	484308	12602	788158	3770336	11750	34072	161087	167610	192834	7430	138130
FECES-j7-exp3-colon_239	12733	480059	4595147	35616	1985439	10532	743	32439	1571440	89574	9118812	149	27637	77424	12965004	29719	44038	1190	921	653214	46668	531054	18979	506714	102437	712264	788191	1044222	391285	2280	1465	315783	740495	2059	801421	76161	86358	159977	7845386	15999	328	1973000	1044164	245013	358213	662155	652673	47044	1490684
MITSUAKI-j7-exp2-colon_241	57418	104799	37731	18376	1818193	5284	967	11541	1185503	31664	2610938	297	11747	44206	10210687	2945	265643	917	1955	445482	17443	622344	12795	443119	108661	579428	727364	1544591	1107346	30134	3147	283350	729370	11550	660934	103744	47407	42406	4605667	14857	769534	2924582	15690	91753	117481	395335	506311	20281	196628
AKKERMANSIA-j7-exp3-colon_244	3389	271611	705585	30924	2055379	5494	357	20685	1815800	66513	5743349	44	21541	35186	18002609	115660	30306	912	1103	672028	22054	763932	9541	377611	96026	743689	1326389	2054574	387195	12019	7481	310476	703575	4080	735518	84818	48813	106600	4736462	33696	79	3958905	15721	165115	584693	448512	422366	57423	324052
ATB-j14-exp2-colon_247	147	82547	7784	4675	3083739	12072	657	11850	1360478	74591	3383686	5	576	34744	8378887	185036	1396	919	1023	2608567	739093	84222	111534	826160	47711	581205	160667	1200217	2166	379	199	290295	752101	83	499724	1534	90428	132148	2101767	59414	2810	2359519	61125	262463	11537570	491786	181624	4182394	377260
ATB-j14-exp3-colon_251	9	85688	8334	24293	2526604	9571	1415	7640	1389510	137728	3028356	12	559	21722	5225174	482599	60	446	832	2752864	941103	73617	131353	624147	60785	726997	134096	1515014	210	113	478	313426	728594	19	396562	95	39794	86382	2044743	34618	114	2821638	70895	346793	11484517	609159	196951	6064997	421233
BURKO-j3-exp2-colon_215	4975	704217	239727	9249	2043831	7595	248	6994	429895	41731	2778648	200	15435	483551	11642649	1991	62335	506	1343	914439	61599	177696	7245	634733	73628	652196	284017	1275538	545087	39254	2360	297342	664249	986	371541	124308	15539	282652	2829588	18890	299990	2532513	14086	46801	439153	363997	484159	21941	1082422
Nacl-j7-exp3-colon_226	322	106811	58145	7582	1524635	3926	733	8627	505888	27287	1991967	155	31225	581481	10886037	2234	67792	893	1370	865164	13560	675887	10884	473880	75010	981326	290733	3150356	88803	109299	2945	469834	879112	12651	748270	3860	32347	128362	1381469	28929	636043	5916008	13645	38756	186279	211124	194711	14813	321702
MITSUAKI-j14-exp2-colon_264	3613	1206810	34689	9247	2106641	5495	323	7200	351321	24737	1689616	228	30203	45126	7657067	3470	62734	588	1545	408973	14514	179223	9545	486542	52666	589157	223540	2451880	159449	119345	978	296222	753168	6115	337917	62378	7118	71663	2264903	10492	355093	4744421	10478	22852	129201	118475	84715	36418	102489
FECES-j14-exp3-colon_256	6838	1439442	50795	2403	635981	5930	238	3765	226588	18421	885483	230	36117	184018	4845845	794	139961	758	1058	1147889	13522	385528	4765	233964	46872	638455	292202	2953869	319983	81732	125	357725	725467	10862	430258	85668	3693	108338	314511	8087	436619	5682719	8422	39216	102612	143906	100035	10306	121433
ATB-j7-exp3-colon_233	12	76805	5914	3587	2815336	7780	370	5813	1077930	228517	2252940	3	128	22843	5489281	793373	119	576	971	2939970	1096652	142464	63793	308802	37908	1247523	73340	1262007	322	70	139	440181	900684	25	326679	151	25428	135296	2204222	59591	360	2376203	94217	379424	14015104	282192	118841	6173746	121750
AKKERMANSIA-j3-exp3-colon_217	114	198538	1924624	61074	1417544	10579	1140	37855	4126352	339725	10556668	10	3985	174504	15295873	855831	11686	1138	1318	1123043	2189802	1091926	10722	1845267	93984	917805	318017	3214608	167522	2674	844	442156	763035	3016	969119	5110	636759	109501	5515033	239207	2348	6100254	740248	734922	2983142	1974950	450492	7396549	237329
FECES-j7-exp3-colon_236	12402	1040325	6339185	42715	2455701	21108	954	47785	1314659	137810	12320683	174	18642	111766	25557671	34498	34243	1258	1578	1077411	77722	1361324	41789	840984	83250	790989	904876	890065	282414	2482	607	362459	780278	4893	958051	105000	103781	315973	8437750	19378	91	1732621	2790389	354188	577840	723939	870045	118396	596977
Nacl-j3-exp3-colon_204	16134	142829	42231	6518	1512327	4998	667	6672	208416	17197	1377159	437	25536	323179	6228069	1902	115910	1042	1090	452653	12991	783295	4991	353524	71676	845841	271412	2868432	201972	77021	496	383711	833082	9741	775156	148150	11451	84912	747517	10380	528023	5324995	8915	39567	127673	210345	117117	22673	147797
AKKERMANSIA-j14-exp3-colon_262	17722	230387	63450	16108	1651291	5461	667	11534	252419	33543	2508476	340	37084	370642	14762860	2768	202534	1067	1259	1159483	15260	316546	13483	497076	124803	767307	251006	2207386	296193	146874	2792	375156	783563	12935	685810	179069	8583	226911	339831	16190	501454	4051883	25356	59058	113282	209238	173075	25592	123503
ATB-j3-exp3-colon_205	35	130128	35610	7193	1821836	13695	1375	11228	2414455	130851	5005203	3	557	34411	6941863	322688	187	757	1412	2108022	1248075	155831	526241	972585	53810	975088	218894	1311176	1384	146	2920	422080	982936	21	416020	237	76310	311881	2494211	83757	108	2442207	105470	354455	11618587	781438	288593	7005528	320710
FECES-j14-exp3-colon_258	21384	243984	22344	2253	1654157	3895	528	4800	149454	11022	933931	393	30491	242541	12313487	1449	135082	731	718	536387	13870	391103	5929	153533	50996	794466	203752	2027881	338439	68030	1241	341165	761160	6338	431098	220935	5103	116569	411276	11313	330024	3909764	8083	37875	123344	196552	132910	32040	176622
Nacl-j3-exp3-colon_200	8072	256188	23916	2868	1548269	3958	618	3172	295644	7819	755304	343	38956	91038	4477343	1386	97103	270	1612	2030972	9540	149497	5005	127699	57009	759783	254757	2120863	209349	143887	3793	390349	798835	6840	352723	90257	5614	38495	42419	6432	329383	4110170	7665	45616	130639	166364	66283	14389	230996
ATB-j14-exp3-colon_250	11	109731	7543	5148	2485368	10514	606	7820	2339655	110010	3571769	4	800	26539	8233834	291464	92	432	1155	2139481	892794	112178	255092	787404	76675	676298	189495	1886066	142	214	155	319150	746672	19	449313	84	34199	261363	2627172	50566	204	3517900	72725	259952	12014228	458097	255124	5700159	287681
AKKERMANSIA-j3-exp3-colon_221	574	115658	3233508	24451	2206725	11157	395	14319	1993281	197344	7712565	1	4694	134424	10047928	583133	15204	828	1316	1674582	1356886	475485	10550	564181	47653	864283	119516	1803624	218385	168	2609	378944	767523	906	534711	3498	281999	54100	4604488	132316	98	3444846	645162	551409	1636866	674803	245338	6672361	59897
FECES-j7-exp3-colon_237	16559	230390	5236071	27802	774178	8395	497	19083	516406	63707	8230203	199	12985	45798	4751236	5188	67393	932	838	517270	37395	471773	9129	218684	69613	697166	463445	3409353	435918	1873	742	320088	751557	3617	583879	93410	27772	73274	3417576	13375	98	6279350	1155506	233274	235864	363397	456555	45796	330580
ATB-j7-exp3-colon_232	10	103333	8040	3974	2760711	15088	794	6147	1607633	73184	2724854	6	1110	25373	6318963	200206	443	507	883	1765339	795539	129196	154050	435420	62504	1186553	140571	1319417	1094	1530	306	430794	935746	50	333923	251	25258	168581	1881649	54771	1702	2594267	59401	248531	9641928	456402	207220	6402184	231551
FECES-j3-exp3-colon_215	118	85354	3344072	28889	3988765	10997	1514	26728	2034513	197363	7064342	8	2490	99835	815715	196800	1552	943	1412	550769	868722	580324	10409	294016	132580	611488	140145	1102566	36078	149	2204	210067	459530	170	690133	585	63577	64159	826046	30570	113	1661548	284463	449005	441710	416580	402149	5766721	160021
AKKERMANSIA-j14-exp3-colon_260	19469	536639	1965742	38609	1924225	5592	402	20185	1508827	104668	9126807	539	24449	151468	17403170	2807	68215	1113	1336	1624408	25883	821037	10829	446737	104641	720329	662041	1584530	491949	15239	918	356033	740371	8873	671235	292861	99684	119618	2092561	175587	993	3063163	48723	176023	414828	301293	616505	22816	420458
Nacl-j7-exp3-colon_223	2591	460686	65895	7042	1985215	4975	304	8375	533314	15971	1313133	128	42422	104281	14742373	2787	17450	963	1529	3716682	21432	375630	10787	295732	63214	1106699	249199	2447671	39139	92654	348	470760	888147	3431	655164	28776	31534	139157	965903	10006	217597	4580131	14872	82886	248673	274076	131797	42452	316940
AKKERMANSIA-j7-exp3-colon_242	455	110656	648114	22732	4009509	5590	707	22842	1660748	194989	6489656	11	15989	36307	672852	251818	10749	1194	1844	336137	12659	1026464	7680	407969	149574	360517	417564	717127	117067	8714	5024	139192	271131	3744	914220	24629	153500	54300	1030873	19242	185	1395489	10714	254085	224552	287714	292043	28736	429486
FECES-j3-exp3-colon_213	887	217757	3354125	29548	2520768	10674	437	36407	2954259	162610	5640285	13	2944	106427	7769227	322776	9187	702	1330	785455	1169746	753102	13686	221923	82233	1011597	254334	1580033	145010	327	3392	459776	922994	352	724570	7525	137780	81542	3860543	39824	74	2930184	423006	515325	225624	692817	555583	5609972	100856
AKKERMANSIA-j7-exp3-colon_243	5941	194088	1162921	68433	537069	6497	865	18731	1962474	49814	10987601	75	17294	39375	5935013	4152	50287	838	1234	484841	17335	1078280	5280	569603	98062	654675	2769154	4724155	545501	4579	1764	366311	785569	6651	664457	146894	17764	68366	1621681	98659	43	8840380	16089	176287	222106	356610	415836	9438	338952
ATB-j3-exp3-colon_208	18	115692	15960	7367	2605166	16986	868	15875	1745367	186745	3615022	3	701	33236	8966426	594132	142	1068	1108	2059010	953684	177922	120846	837426	61257	889306	189504	1264403	931	286	179	368274	837429	46	568387	357	99486	144501	4257241	62388	134	2341079	99199	327721	10170349	626351	228934	5969678	242174
AKKERMANSIA-j14-exp3-colon_264	1664	581428	73236	7406	1530209	4651	485	8339	487604	21692	1660554	122	31737	271705	13182842	1260	80551	901	1765	5441549	10118	484798	10599	452736	63678	746240	307230	2795078	153864	111010	2917	340877	777386	5163	563252	49781	12706	190519	545863	14965	288370	5351866	9565	90495	240250	238606	202268	11091	298007
FECES-j7-exp3-colon_240	12458	408685	1603783	27717	1386857	7391	494	21738	677542	77794	8350396	150	19116	65451	11221994	11633	73827	1156	1129	545803	38605	1082455	9392	332371	71631	763306	572236	2498396	495698	8553	983	349358	763282	8467	791282	123673	101137	120424	5535620	62193	116	4705236	995699	259328	273235	427249	595878	24862	527604
ATB-j14-exp3-colon_249	92	112025	12275	5767	2688755	10209	1389	13460	3227953	133432	5048392	5	968	33852	8616298	409803	708	712	1444	3493877	1264453	204126	460494	1145908	68157	736332	268049	1117344	2103	505	627	336792	767659	54	703702	1391	91406	313904	3098151	74102	1995	2174369	104028	377523	16667044	726297	357933	6898778	279904
Nacl-j7-exp3-colon_228	8011	1243679	86813	2685	1870472	4159	487	6634	628027	16709	1329218	237	43410	284483	13152817	1967	92090	811	1618	4736153	11009	1133263	9172	344218	103725	899269	464875	1733814	176119	106627	7123	436496	799393	15009	777423	80239	7877	208977	538234	13376	375533	3224409	21063	105448	217536	212501	224827	20430	553349
ATB-j7-exp3-colon_229	11	91163	16111	4969	2788145	11276	1044	13659	2169770	129591	4238915	1	647	33364	6273323	418758	59	708	1196	3890299	1111311	220665	173387	901369	46481	892489	175317	821971	274	160	239	410304	812299	12	649107	55	76837	185837	3571656	82684	128	1579104	82829	372535	19510254	835829	278453	7043151	233566
FECES-j14-exp3-colon_253	67655	83596	22925	5686	1033605	4902	789	4425	132835	22359	1147165	1726	23328	267264	7058081	964	218123	845	1281	294374	13662	726262	4466	140722	51519	715398	331388	3154608	364288	40703	269	351066	733567	15784	470423	565689	6022	60301	224078	11815	458846	5864946	8942	31224	82189	196178	148929	10586	90627
Nacl-j3-exp3-colon_199	924	116334	131571	26335	1883421	3740	425	10158	588064	33646	2740925	108	23312	301095	7694542	1915	200771	824	1526	1088910	11487	880421	6902	403778	34275	837425	206035	2541231	327845	140524	400	443308	846520	3170	667838	9618	79324	126451	813422	14588	514280	4855606	10869	37866	221326	249643	116042	9855	299384
AKKERMANSIA-j3-exp3-colon_219	944	130411	5028904	20577	540719	15748	651	20947	1837051	370207	11370598	11	5485	182299	865241	211943	6125	675	2791	1671354	30986	651602	4978	402728	56679	924353	288132	5009719	103072	5659	1071	524367	788631	787	548145	4789	248544	36860	990107	102294	159	9337033	127096	215387	633443	507883	331070	100445	132429
ATB-j14-exp3-colon_252	15	81905	5745	6878	2525902	6022	178	4825	1018099	93003	1960605	7	631	23198	3314780	227764	132	547	839	2205024	617820	94481	33931	261457	44357	766920	83866	1279165	299	235	352	344461	758934	22	321976	164	27283	58617	1317064	35564	360	2464659	52446	213235	11921337	341303	136116	5484745	88410
AKKERMANSIA-j7-exp3-colon_245	8984	193012	542724	65805	1024014	6539	335	22519	1599993	77800	9537398	83	13586	70117	10061792	45764	52538	731	1982	844624	15392	810990	6537	459679	87974	738649	1396086	3912548	578020	6301	2645	349212	726323	6415	712771	137706	25576	52356	3847724	57853	64	7156479	14942	233554	261935	381189	538198	15720	363506
ATB-j7-exp3-colon_234	17	158436	45374	7106	2827569	11337	1721	45345	2352680	119662	6111471	1	809	49018	25805172	247286	217	1458	1098	2949576	943463	388889	227965	1857411	59653	965692	219775	1145226	1103	346	326	396999	827845	28	1050039	306	469736	258952	5794837	73095	332	2169193	79468	312356	15843761	1437829	315727	6880788	397924
Nacl-j7-exp3-colon_227	2404	148954	72230	18876	941772	4352	474	7598	261620	29443	3393008	163	31201	241419	9905019	1663	47588	1187	982	494001	8712	614742	7372	1118116	67881	1127223	319524	4835616	49828	98217	116	483239	893407	9773	665856	22563	19096	93583	442416	25172	325144	9171279	8314	31157	167943	272329	154731	21182	186101
FECES-j14-exp3-colon_254	9228	615221	61749	12608	2257622	3645	293	14089	324061	26928	2320846	497	27511	294042	16987762	4211	74050	1107	970	903064	15001	690920	12228	542875	30317	729533	332574	2627797	287854	65322	73	362145	774381	7698	760827	223244	82752	119084	2973523	14346	272039	5018334	10939	35489	173016	367639	124424	35690	312970
ATB-j3-exp3-colon_210	5	121899	14086	5558	2667150	11116	1029	17426	2398831	113038	4796301	6	621	36182	13190901	267505	58	808	1356	2364009	1063161	231652	323409	946845	70772	929103	224463	1342986	110	238	354	417559	878308	4	550228	83	96040	283813	3185721	73697	104	2505074	84773	318367	9941015	784405	295750	6895371	253447
AKKERMANSIA-j3-exp3-colon_222	32	168749	3512812	40575	1539294	10834	442	23568	3008052	198982	9184844	8	2913	134453	9406307	339251	782	992	1070	875982	1307801	747492	7718	621847	91007	819915	182382	3495684	13058	930	919	425473	749781	145	747443	535	379142	98851	3852394	51033	702	6594108	701261	547112	1717277	1307270	430366	7284760	113642
FECES-j3-exp3-colon_216	411	269251	5201019	21435	2660265	9169	1077	30579	2904772	146135	6841257	8	2615	173173	10916777	242989	4352	994	1628	550647	998913	1076595	12638	660090	55675	1246388	279653	2342264	73660	244	1126	494662	940787	500	924398	3415	237776	95192	5541119	39266	197	4345569	450657	449037	226908	1419267	632048	4891893	100536
ATB-j14-exp3-colon_247	55	69669	10440	4734	1676880	31535	503	8882	1024873	117913	3026560	8	1198	29933	3093707	229938	278	586	1035	3284912	920685	115007	66479	360401	31119	740053	88986	2992974	674	1142	320	342214	795380	44	367995	429	42015	71937	1237675	59728	2412	5652034	71985	281448	15005518	415039	120771	6148451	120089
AKKERMANSIA-j7-exp3-colon_246	884	287569	244366	51054	892827	7940	847	41281	2533490	62328	11113264	135	27881	86915	10798850	18371	20743	1173	1720	1158142	28159	707348	10897	1187695	80555	718187	1370239	3988862	263552	36917	3278	374818	722600	5775	982151	93860	207258	101565	3533034	195468	59	7395432	20421	153293	279132	740801	679338	46125	333819
FECES-j14-exp3-colon_255	49077	105059	40450	5997	1656901	5181	942	9096	267039	14821	1865741	945	26561	411641	8108100	1741	230749	576	1635	496448	16020	633935	7459	388789	63043	826825	371711	3249699	421694	54398	134	371000	773252	15261	590772	346940	11188	115022	1146184	13405	467500	6155433	11435	41642	81862	236811	134884	7774	117956
St_SCFA-exp2-colon_pre	NA	NA	NA	NA	NA	NA	NA	NA	NA	NA	NA	NA	3484	NA	NA	NA	NA	NA	NA	NA	NA	NA	NA	NA	NA	NA	NA	NA	NA	16540	NA	NA	NA	NA	NA	NA	NA	NA	NA	NA	NA	NA	NA	NA	NA	NA	NA	NA	NA
St_PA-exp1-colon_pre	NA	NA	NA	NA	NA	NA	NA	NA	NA	NA	NA	NA	NA	NA	NA	NA	NA	NA	NA	NA	NA	NA	NA	NA	NA	NA	NA	NA	NA	NA	12	NA	NA	NA	NA	NA	NA	NA	NA	NA	NA	NA	NA	NA	NA	NA	NA	NA	NA
St_BA1-exp3-colon_pre	412	NA	NA	NA	NA	NA	NA	NA	NA	NA	NA	21246	NA	NA	NA	NA	3327	NA	NA	NA	NA	NA	NA	NA	NA	NA	NA	NA	482	NA	NA	NA	NA	33202	NA	33171	NA	NA	NA	NA	56050	NA	NA	NA	NA	NA	NA	NA	NA
St_AA-exp1-colon_pre	NA	63189	1179	2281	1730957	4282	155	5	534911	658	93796	NA	NA	318	1992994	98	NA	19	247	109	421	749	53	76268	5407	976255	665264	1609579	NA	NA	NA	194602	339472	NA	698	NA	12522158	25396	33936	403	NA	3023976	844	40	929	450708	382699	261	1216
St_BA2-exp3-colon_pre	14943	NA	NA	NA	NA	NA	NA	NA	NA	NA	NA	12	NA	NA	NA	NA	27	NA	NA	NA	NA	NA	NA	NA	NA	NA	NA	NA	99855	NA	NA	NA	NA	27825	NA	497	NA	NA	NA	NA	2113	NA	NA	NA	NA	NA	NA	NA	NA
St_SCFA-exp2-colon_post	NA	NA	NA	NA	NA	NA	NA	NA	NA	NA	NA	NA	1397	NA	NA	NA	NA	NA	NA	NA	NA	NA	NA	NA	NA	NA	NA	NA	NA	10547	NA	NA	NA	NA	NA	NA	NA	NA	NA	NA	NA	NA	NA	NA	NA	NA	NA	NA	NA
St_SCFA1-exp1-colon_pre	NA	NA	NA	NA	NA	NA	NA	NA	NA	NA	NA	NA	2271	NA	NA	NA	NA	NA	NA	NA	NA	NA	NA	NA	NA	NA	NA	NA	NA	10901	NA	NA	NA	NA	NA	NA	NA	NA	NA	NA	NA	NA	NA	NA	NA	NA	NA	NA	NA
St_BA2-exp3-colon_post	14120	NA	NA	NA	NA	NA	NA	NA	NA	NA	NA	7	NA	NA	NA	NA	12	NA	NA	NA	NA	NA	NA	NA	NA	NA	NA	NA	93776	NA	NA	NA	NA	18652	NA	393	NA	NA	NA	NA	1634	NA	NA	NA	NA	NA	NA	NA	NA
St_BA1-exp3-colon_post	408	NA	NA	NA	NA	NA	NA	NA	NA	NA	NA	24314	NA	NA	NA	NA	3053	NA	NA	NA	NA	NA	NA	NA	NA	NA	NA	NA	17	NA	NA	NA	NA	28233	NA	36179	NA	NA	NA	NA	50671	NA	NA	NA	NA	NA	NA	NA	NA
St_BA1-exp1-colon_pre	300	NA	NA	NA	NA	NA	NA	NA	NA	NA	NA	25006	NA	NA	NA	NA	2742	NA	NA	NA	NA	NA	NA	NA	NA	NA	NA	NA	587	NA	NA	NA	NA	41122	NA	31075	NA	NA	NA	NA	62236	NA	NA	NA	NA	NA	NA	NA	NA
St_BA2-exp1-colon_pre	15150	NA	NA	NA	NA	NA	NA	NA	NA	NA	NA	121	NA	NA	NA	NA	194	NA	NA	NA	NA	NA	NA	NA	NA	NA	NA	NA	119318	NA	NA	NA	NA	83637	NA	735	NA	NA	NA	NA	5096	NA	NA	NA	NA	NA	NA	NA	NA
St_PA-exp1-colon_post	NA	NA	NA	NA	NA	NA	NA	NA	NA	NA	NA	NA	NA	NA	NA	NA	NA	NA	NA	NA	NA	NA	NA	NA	NA	NA	NA	NA	NA	NA	12	NA	NA	NA	NA	NA	NA	NA	NA	NA	NA	NA	NA	NA	NA	NA	NA	NA	NA
St_AA-exp1-colon_post	NA	195971	9655	15841	2983653	7614	560	373	1083083	2864	525866	NA	NA	24692	3118649	141	NA	59	1605	734	1376	2865	266	184462	14909	556295	1702861	2983356	NA	NA	NA	305084	510362	NA	837	NA	27943470	135646	69832	18131	NA	5466017	1895	13705	2928	1484346	630810	1690	1716
St_PA-exp2-colon_pre	NA	NA	NA	NA	NA	NA	NA	NA	NA	NA	NA	NA	NA	NA	NA	NA	NA	NA	NA	NA	NA	NA	NA	NA	NA	NA	NA	NA	NA	NA	24	NA	NA	NA	NA	NA	NA	NA	NA	NA	NA	NA	NA	NA	NA	NA	NA	NA	NA
St_AA_exp2-colon_pre	NA	114411	5528	2816	2002566	5714	254	63	736494	1039	202932	NA	NA	827	1398982	100	NA	33	641	235	522	929	57	96639	9283	1526473	733055	3950043	NA	NA	NA	267855	432496	NA	524	NA	14922985	37220	46688	610	NA	7766410	944	55	1427	527544	483876	740	355
St_SCFA1-exp1-colon_post	NA	NA	NA	NA	NA	NA	NA	NA	NA	NA	NA	NA	1428	NA	NA	NA	NA	NA	NA	NA	NA	NA	NA	NA	NA	NA	NA	NA	NA	12992	NA	NA	NA	NA	NA	NA	NA	NA	NA	NA	NA	NA	NA	NA	NA	NA	NA	NA	NA
St_SCFA-exp3-colon_pre	NA	NA	NA	NA	NA	NA	NA	NA	NA	NA	NA	NA	2678	NA	NA	NA	NA	NA	NA	NA	NA	NA	NA	NA	NA	NA	NA	NA	NA	11473	NA	NA	NA	NA	NA	NA	NA	NA	NA	NA	NA	NA	NA	NA	NA	NA	NA	NA	NA
St_PA-exp2-colon_post	NA	NA	NA	NA	NA	NA	NA	NA	NA	NA	NA	NA	NA	NA	NA	NA	NA	NA	NA	NA	NA	NA	NA	NA	NA	NA	NA	NA	NA	NA	65	NA	NA	NA	NA	NA	NA	NA	NA	NA	NA	NA	NA	NA	NA	NA	NA	NA	NA
St_AA_exp2-colon_post	NA	46905	1513	13787	3153132	8559	480	52	1163882	2006	231987	NA	NA	7434	2013852	159	NA	119	703	1025	1631	1195	98	196833	8766	322916	2013076	5354946	NA	NA	NA	270621	581816	NA	493	NA	24108506	162216	60228	4474	NA	10851358	1498	4097	3104	1166715	761017	2718	590
St_PA-exp3-colon_pre	NA	NA	NA	NA	NA	NA	NA	NA	NA	NA	NA	NA	NA	NA	NA	NA	NA	NA	NA	NA	NA	NA	NA	NA	NA	NA	NA	NA	NA	NA	8	NA	NA	NA	NA	NA	NA	NA	NA	NA	NA	NA	NA	NA	NA	NA	NA	NA	NA
St_AA_exp3-colon_pre	NA	86182	815	3119	1836833	4004	116	40	631856	709	127283	NA	NA	1329	1505396	88	NA	102	386	497	779	1587	95	91913	12729	973759	625996	3613858	NA	NA	NA	289931	444842	NA	701	NA	15398488	35240	51039	946	NA	6871730	540	189	2215	490796	419229	1471	311
St_BA2-exp1-colon_post	15287	NA	NA	NA	NA	NA	NA	NA	NA	NA	NA	125	NA	NA	NA	NA	345	NA	NA	NA	NA	NA	NA	NA	NA	NA	NA	NA	122900	NA	NA	NA	NA	39592	NA	679	NA	NA	NA	NA	2758	NA	NA	NA	NA	NA	NA	NA	NA
St_BA1-exp1-colon_post	277	NA	NA	NA	NA	NA	NA	NA	NA	NA	NA	27101	NA	NA	NA	NA	1162	NA	NA	NA	NA	NA	NA	NA	NA	NA	NA	NA	654	NA	NA	NA	NA	28097	NA	34986	NA	NA	NA	NA	48620	NA	NA	NA	NA	NA	NA	NA	NA
St_BA1-exp2-colon_pre	355	NA	NA	NA	NA	NA	NA	NA	NA	NA	NA	22234	NA	NA	NA	NA	3342	NA	NA	NA	NA	NA	NA	NA	NA	NA	NA	NA	537	NA	NA	NA	NA	30476	NA	30977	NA	NA	NA	NA	50222	NA	NA	NA	NA	NA	NA	NA	NA
St_BA2-exp2-colon_pre	16088	NA	NA	NA	NA	NA	NA	NA	NA	NA	NA	16	NA	NA	NA	NA	NA	NA	NA	NA	NA	NA	NA	NA	NA	NA	NA	NA	117226	NA	NA	NA	NA	42283	NA	608	NA	NA	NA	NA	3532	NA	NA	NA	NA	NA	NA	NA	NA
St_SCFA-exp3-colon_post	NA	NA	NA	NA	NA	NA	NA	NA	NA	NA	NA	NA	1685	NA	NA	NA	NA	NA	NA	NA	NA	NA	NA	NA	NA	NA	NA	NA	NA	11768	NA	NA	NA	NA	NA	NA	NA	NA	NA	NA	NA	NA	NA	NA	NA	NA	NA	NA	NA
St_PA-exp3-colon_post	NA	NA	NA	NA	NA	NA	NA	NA	NA	NA	NA	NA	NA	NA	NA	NA	NA	NA	NA	NA	NA	NA	NA	NA	NA	NA	NA	NA	NA	NA	37	NA	NA	NA	NA	NA	NA	NA	NA	NA	NA	NA	NA	NA	NA	NA	NA	NA	NA
St_AA_exp3-colon_post	NA	49769	2976	16958	3011746	5912	602	356	1129132	1155	385162	NA	NA	8873	2361722	164	NA	54	713	1126	1258	1860	151	185601	7659	338596	1682588	5247105	NA	NA	NA	307195	621904	NA	1095	NA	24630969	186240	75761	5142	NA	10049662	1395	7152	4247	1159553	623578	3102	507
St_cadaverine-exp3-colon_7a	NA	NA	NA	NA	NA	NA	NA	NA	NA	NA	NA	NA	NA	NA	NA	NA	NA	NA	NA	NA	NA	NA	NA	NA	NA	NA	NA	NA	NA	NA	935050	NA	NA	NA	NA	NA	NA	NA	NA	NA	NA	NA	NA	NA	NA	NA	NA	NA	NA
St_BA2-exp2-colon_post	16343	NA	NA	NA	NA	NA	NA	NA	NA	NA	NA	11	NA	NA	NA	NA	NA	NA	NA	NA	NA	NA	NA	NA	NA	NA	NA	NA	119802	NA	NA	NA	NA	36062	NA	726	NA	NA	NA	NA	2661	NA	NA	NA	NA	NA	NA	NA	NA
St_BA1-exp2-colon_post	330	NA	NA	NA	NA	NA	NA	NA	NA	NA	NA	24415	NA	NA	NA	NA	4461	NA	NA	NA	NA	NA	NA	NA	NA	NA	NA	NA	680	NA	NA	NA	NA	26394	NA	32255	NA	NA	NA	NA	46232	NA	NA	NA	NA	NA	NA	NA	NA
[truncated: 102 more columns]

## Sheet: AreaQCCorr
Sid	12-dehydrocholic acid@5.38-ba	2-hydroxybutyric acid@7.23-gc	2-hydroxyglutaric acid@13.01-gc	2-oxoglutaric acid@13.01-gc	3-hydroxybutyric acid@7.41-gc	3-hydroxyisovaleric acid@7.82-gc	3-methylhistidine@16.86-gc	4-hydroxymandelic acid@15.23-gc	4-hydroxyproline@12.44-gc	5-aminovaleric acid@13.53-gc	5-oxoproline@12.35-gc	7,12-dihydroxy-3-oxocholanoic acid@7.11-ba	Acetic acid@1.78-sf	Adenine@16.19-gc	Alanine@6.92-gc	Allantoin@16.54-gc	Alpha-muricholic acid@6.00-ba	Alpha-tocopherol@29.51-gc	Anthranilic acid@13.43-gc	Arabinose@14.17-gc	Arabitol@14.82-gc	Arachidonic acid@23.75-gc	Asparagine@14.13-gc	Aspartic acid@12.37-gc	Behenic acid@26.41-gc	Benzoic acid@8.76-gc	Beta-alanine@11.16-gc	Beta-hydroxypyruvic acid@5.45-gc	Beta-muricholic acid@6.27-ba	Butanoic acid@5.24-sf	Cadaverine@4.45-pa	Capric acid@11.44-gc	Caprylic acid@8.95-gc	Chenodeoxycholic acid@10.32-ba	Cholesterol@29.51-gc	Cholic acid@9.13-ba	Citric acid;Isocitric acid@15.81-gc	Citrulline@15.78-gc	Creatine@12.80-gc	Cytosine@12.37-gc	Deoxycholic acid@10.54-ba	Dimethylglycine@5.45-gc	Erythritol@12.29-gc	Ferulic acid@19.20-gc	Fructose@16.48-gc	Fumaric acid@10.06-gc	GABA@12.44-gc	Galactitol;Sorbitol;Mannitol@17.29-gc	Galactose;Glucose;Mannose@17.01-gc
BlM-exp2-colon_pre	NA	NA	NA	NA	NA	NA	NA	NA	NA	NA	NA	NA	53755.787	NA	NA	NA	NA	NA	NA	NA	NA	NA	NA	NA	NA	NA	NA	NA	NA	170946.273	NA	NA	NA	NA	NA	NA	NA	NA	NA	NA	NA	NA	NA	NA	NA	NA	NA	NA	NA
BlM_exp1-colon_pre	21.71	78518.555	3738.707	33.819	1225918.911	2144.443	44.37	15.266	1824.626	89.627	181489.414	9.905	NA	452.274	398692.489	10.849	32.368	10.494	275.614	506.063	24.977	5988.806	433.668	3005.281	10100	1325687.932	1874.452	3511031.96	65.897	NA	34.56	470610.239	896302.901	570.202	2013.939	483.772	81000.352	444.589	240.677	309.866	509.87	6444190.717	513.952	14.557	2443.728	52364.196	874.494	228.428	2076.037
BlM-exp2-colon_post	NA	NA	NA	NA	NA	NA	NA	NA	NA	NA	NA	NA	9000.961	NA	NA	NA	NA	NA	NA	NA	NA	NA	NA	NA	NA	NA	NA	NA	NA	10961.878	NA	NA	NA	NA	NA	NA	NA	NA	NA	NA	NA	NA	NA	NA	NA	NA	NA	NA	NA
BlM-exp1-colon_pre	NA	NA	NA	NA	NA	NA	NA	NA	NA	NA	NA	NA	4265.89	NA	NA	NA	NA	NA	NA	NA	NA	NA	NA	NA	NA	NA	NA	NA	NA	956.174	NA	NA	NA	NA	NA	NA	NA	NA	NA	NA	NA	NA	NA	NA	NA	NA	NA	NA	NA
BlM_exp3-colon_pre	57.31	183918.236	621.423	60.36	1143867.38	3577.909	177.422	9.099	1300.04	178.091	143211.046	45.978	NA	1248.404	210442.188	16.727	56.198	24.011	587.176	711.284	89.696	2194.804	1181.632	2755.955	13715.175	1247735.493	3009.67	2233659.925	97.657	NA	158.895	579052.007	1096334.764	92.958	341.442	262.206	64802.279	131.644	454.174	697.154	269.832	4273708.045	129.514	222.721	1017.072	29182.41	1882.833	717.254	139.575
BlM_exp1-colon_post	26.446	155970.298	27135.276	303.17	2668201.495	3615.154	335.76	1818.753	134125.058	571.371	992526.731	25.494	NA	42647.472	615601.848	34.103	71.43	14.045	1116.154	1690.404	3169.838	26804.694	1870.067	27509.463	26995.319	973264.169	6814.177	3186235.376	393.347	NA	534.337	560869.801	1141563.317	31.597	3072.146	261.866	34728.303	1184.416	7658.422	23114.947	528.036	5713745.33	4469.925	88829.567	9702.111	349659.121	9135.967	3955.891	3013.454
BlM_exp2-colon_pre	14.08	170880.218	11553.698	27.144	955633.671	4415.828	134.819	8.902	1733.912	658.314	238706.098	10.11	NA	465.794	75757.334	137.43	19.9	18.753	286.309	9516.772	608.267	1615.335	976.596	2044.553	8260.418	941786.204	2196.297	5519068.702	202.662	NA	97.604	481267.096	1106297.969	317.022	667.436	298.732	34249.591	254.159	359.392	333.237	472.864	10099270.734	1199.262	568.216	8311.886	34674.189	2187.334	4733.673	472.57
BlM-exp1-colon_post	NA	NA	NA	NA	NA	NA	NA	NA	NA	NA	NA	NA	3553.398	NA	NA	NA	NA	NA	NA	NA	NA	NA	NA	NA	NA	NA	NA	NA	NA	906.848	NA	NA	NA	NA	NA	NA	NA	NA	NA	NA	NA	NA	NA	NA	NA	NA	NA	NA	NA
BlM-exp3-colon_pre	NA	NA	NA	NA	NA	NA	NA	NA	NA	NA	NA	NA	5763.257	NA	NA	NA	NA	NA	NA	NA	NA	NA	NA	NA	NA	NA	NA	NA	NA	1412.761	NA	NA	NA	NA	NA	NA	NA	NA	NA	NA	NA	NA	NA	NA	NA	NA	NA	NA	NA
BlM_exp3-colon_post	28.206	108249.837	1244.047	190.494	1978505.568	5136.787	247.206	872.754	46325.498	185.392	342056.923	9.195	NA	7330.343	571237.955	124.689	88.279	69.353	806.972	867.028	1090.444	4846.892	2214.937	8392.897	9147.165	905190.827	4788.727	913811.905	81.366	NA	477.811	432898.477	936398.879	83.471	1201.885	320.207	3675.196	660.679	4114.109	5019.721	547.547	1710724.237	1888.879	24192.769	1792.685	152575.865	4550.309	1108.264	156.414
BlM_exp2-colon_post	14.755	79435.816	2424.088	77.583	3004079.463	5788.148	356.756	535.786	37418.725	554.139	251991.971	NA	NA	9158.498	515077.111	321.926	127.939	18.865	1323.309	15497.777	2071.775	4068.821	1803.03	6258.863	10939.079	874202.664	4851.782	1996257.317	397.916	NA	419.941	526662.895	1227073.444	62.638	974.999	601.661	23548.178	1060.189	2665.446	1993.412	899.79	3931789.943	2738.515	21313.635	11430.318	94203.094	5951.272	8028.123	329.208
BlM-exp3-colon_post	NA	NA	NA	NA	NA	NA	NA	NA	NA	NA	NA	NA	4518.061	NA	NA	NA	NA	NA	NA	NA	NA	NA	NA	NA	NA	NA	NA	NA	NA	1280.269	NA	NA	NA	NA	NA	NA	NA	NA	NA	NA	NA	NA	NA	NA	NA	NA	NA	NA	NA
QC_batch-exp2-colon_5d	NA	NA	NA	NA	NA	NA	NA	NA	NA	NA	NA	NA	1552375.926	NA	NA	NA	NA	NA	NA	NA	NA	NA	NA	NA	NA	NA	NA	NA	NA	121410436.445	NA	NA	NA	NA	NA	NA	NA	NA	NA	NA	NA	NA	NA	NA	NA	NA	NA	NA	NA
QC_exp123-colon_pre.bacolon3	112878.089	NA	NA	NA	NA	NA	NA	NA	NA	NA	NA	1962.336	NA	NA	NA	NA	685249.652	NA	NA	NA	NA	NA	NA	NA	NA	NA	NA	NA	2783832.283	NA	NA	NA	NA	24168.354	NA	752282.652	NA	NA	NA	NA	1042230.094	NA	NA	NA	NA	NA	NA	NA	NA
QC_batch-exp2-colon_5e	NA	NA	NA	NA	NA	NA	NA	NA	NA	NA	NA	NA	1265382.071	NA	NA	NA	NA	NA	NA	NA	NA	NA	NA	NA	NA	NA	NA	NA	NA	82106674.793	NA	NA	NA	NA	NA	NA	NA	NA	NA	NA	NA	NA	NA	NA	NA	NA	NA	NA	NA
QC_batch-exp2-colon_5f	NA	NA	NA	NA	NA	NA	NA	NA	NA	NA	NA	NA	990837.506	NA	NA	NA	NA	NA	NA	NA	NA	NA	NA	NA	NA	NA	NA	NA	NA	47169806.711	NA	NA	NA	NA	NA	NA	NA	NA	NA	NA	NA	NA	NA	NA	NA	NA	NA	NA	NA
QC_exp1-colon_5a	85309.192	810502.482	1033237.141	38451.356	3207715.669	10078.484	818.918	25030.281	2515286.305	158505.313	9272982.86	2206.753	NA	229890.491	19164349.577	245849.84	691798.854	1118.733	3683.048	2520196.962	685460.097	1091370.098	157162.07	1421331.333	116575.997	1342932.802	864272.297	1307967.49	2679412.749	NA	28997.056	618977.898	1177932.659	43281.442	869955.455	731348.522	128239.618	262951.923	6136923.221	69410.383	1510944.732	2355814.449	352030	591237.308	7374866.613	621803.091	707500.635	6132372.478	809942.994
QC_batch-exp2-colon_5g	NA	NA	NA	NA	NA	NA	NA	NA	NA	NA	NA	NA	753540.18	NA	NA	NA	NA	NA	NA	NA	NA	NA	NA	NA	NA	NA	NA	NA	NA	26489170.839	NA	NA	NA	NA	NA	NA	NA	NA	NA	NA	NA	NA	NA	NA	NA	NA	NA	NA	NA
QC_exp1-colon_5b	82705.752	838821.973	1117900.828	42417.038	3648460.195	10524.118	1312.763	27521.235	2784891.2	181671.29	10052633.759	1243.271	NA	254772.512	19845582.349	300455.593	616636.95	1083.947	3204.608	2631741.862	724162.694	1223910.407	175829.93	1555861.668	123290.424	1522252.263	914687.363	1416391.824	2602934.314	NA	37134.077	640076.514	1235403.801	30274.344	940480.299	712679.342	154151.31	315541.658	6557185.571	80756.769	1417834.405	2706468.11	380281.12	621494.12	7781341.038	837556.696	760723.046	6604411.861	872158.104
QC_batch-exp2-colon_5h	NA	NA	NA	NA	NA	NA	NA	NA	NA	NA	NA	NA	555469.831	NA	NA	NA	NA	NA	NA	NA	NA	NA	NA	NA	NA	NA	NA	NA	NA	13968870.667	NA	NA	NA	NA	NA	NA	NA	NA	NA	NA	NA	NA	NA	NA	NA	NA	NA	NA	NA
QC_exp1-colon_6a	NA	825908.184	1070506.66	21155.509	3180157.649	9650.281	1484.487	27407.849	2415900.562	212844.275	9595036.443	NA	NA	241723.941	18527476.334	174111.08	NA	1065.523	3447.764	2360516.232	660055.244	1028361.003	198476.994	1384017.237	99988.153	1656933.72	844906.47	1799161.34	NA	NA	NA	687149.623	1268174.488	NA	847633.895	NA	70326.812	249295.436	5853169.474	76267.831	NA	3394037.547	355325.328	607178.35	7040115.372	839718.813	685212.993	5859193.045	764626.578
QC_exp1-colon_5c	81760.266	800393.415	1122634.742	41047.643	3520831.211	10527.835	1043.198	24831.934	2683260.624	186723.952	9277178.166	1651.72	NA	248286.674	19304447.127	242713.583	626504.734	1249.034	3258.197	2585354.549	586454.989	1048547.557	152780.855	1432830.327	104402.081	1256880.168	900292.502	1402627.487	2580323.548	NA	28880.025	610482.811	1203433.888	34484.105	911840.752	716577.781	151916.704	265444.262	5710163.024	73534.192	1406694.073	2594317.866	382525.85	634557.316	7529396.152	821049.633	732350.752	6344651.72	855516.868
QC_batch-exp2-colon_5i	NA	NA	NA	NA	NA	NA	NA	NA	NA	NA	NA	NA	438721.424	NA	NA	NA	NA	NA	NA	NA	NA	NA	NA	NA	NA	NA	NA	NA	NA	8813313.362	NA	NA	NA	NA	NA	NA	NA	NA	NA	NA	NA	NA	NA	NA	NA	NA	NA	NA	NA
QC_exp1-colon_6b	NA	910531.809	1121959.381	37579.66	3729529.047	10116.949	1072.218	24160.256	2610352.164	168014.63	10042085.741	NA	NA	244873.872	19706438.071	244547.725	NA	829.382	3146.684	2499736.983	705935.503	1015881.049	154388.387	1406635.176	102288.839	1539963.616	874972.634	1757204.96	NA	NA	NA	703891.867	1288269.584	NA	896769.967	NA	128899.429	221267.077	6374302.686	78541.7	NA	3330860.373	375502.165	590799.565	7263073.667	987515.221	711310.762	6159657.116	810999.611
QC_exp1-colon_5d	82134.438	892614.037	1240240.063	48550.735	3748136.108	11627.019	784.653	28729.471	2945456.611	191667.563	10274012.859	1701.422	NA	299980.304	22349776.645	293303.565	624888.444	879.166	4095.969	2809971.107	775026.556	1228875.592	184737.561	1589560.165	122542.296	1340003.934	980064.164	1449957.972	2496390.484	NA	32837.693	658122.298	1310244.771	25837.891	994375.194	708153.211	186869.348	323620.042	6492270.344	92248.928	1363274.512	2688510.908	411431.066	626889.062	8314879.794	721921.158	778592.454	7047150.781	949075.172
QC_batch-exp2-colon_5j	NA	NA	NA	NA	NA	NA	NA	NA	NA	NA	NA	NA	343224.509	NA	NA	NA	NA	NA	NA	NA	NA	NA	NA	NA	NA	NA	NA	NA	NA	6055289.559	NA	NA	NA	NA	NA	NA	NA	NA	NA	NA	NA	NA	NA	NA	NA	NA	NA	NA	NA
QC_exp1-colon_6c	NA	831222.453	1144253.687	44227.574	3748792.591	9883.649	1223.253	27460.674	2587701.045	157640.735	9639081.585	NA	NA	233025.148	19342383.811	235677.549	NA	1305.411	3475.031	2532313.093	727908.668	1455296.729	140788.178	1356291.6	109259.66	1525555.533	891853.975	1681104.576	NA	NA	NA	674721.337	1285892.633	NA	920448.908	NA	146641.121	229718.927	6186875.177	76401.521	NA	3136513.048	373430.355	616595.161	7506641.832	853487.612	719950.084	6389338.64	829654.125
QC_exp123-colon_post.bacolon3	117622.146	NA	NA	NA	NA	NA	NA	NA	NA	NA	NA	2333.846	NA	NA	NA	NA	692341.49	NA	NA	NA	NA	NA	NA	NA	NA	NA	NA	NA	2850756.252	NA	NA	NA	NA	16106.883	NA	833447.869	NA	NA	NA	NA	1030384.077	NA	NA	NA	NA	NA	NA	NA	NA
QC-exp1-colon_5a	NA	NA	NA	NA	NA	NA	NA	NA	NA	NA	NA	NA	167514.897	NA	NA	NA	NA	NA	NA	NA	NA	NA	NA	NA	NA	NA	NA	NA	NA	841779.119	NA	NA	NA	NA	NA	NA	NA	NA	NA	NA	NA	NA	NA	NA	NA	NA	NA	NA	NA
QC_exp123-colon_pre.bacolon1	72493.684	NA	NA	NA	NA	NA	NA	NA	NA	NA	NA	1120.784	NA	NA	NA	NA	514092.468	NA	NA	NA	NA	NA	NA	NA	NA	NA	NA	NA	2137655.495	NA	NA	NA	NA	35313.406	NA	820372.282	NA	NA	NA	NA	981251.898	NA	NA	NA	NA	NA	NA	NA	NA
QC-exp1-colon_5b	NA	NA	NA	NA	NA	NA	NA	NA	NA	NA	NA	NA	162259.171	NA	NA	NA	NA	NA	NA	NA	NA	NA	NA	NA	NA	NA	NA	NA	NA	819650.069	NA	NA	NA	NA	NA	NA	NA	NA	NA	NA	NA	NA	NA	NA	NA	NA	NA	NA	NA
QC_exp1-colon_6d	NA	719166.615	1094176.981	40410.159	3117156.051	9774.766	462.807	24549.818	2570971.823	168403.286	9100358.938	NA	NA	254439.125	17085437.621	258853.644	NA	1127.779	3389.571	2476799.042	694529.726	982298.707	133445.301	1388575.643	123294.618	1349461.098	833182.863	1398361.787	NA	NA	NA	628746.571	1165942.369	NA	889685.902	NA	138864.32	282806.457	5920309.014	78578.741	NA	2649773.333	360485.967	579055.781	7379534.392	645318.016	694345.911	6392944.279	836556.046
QC_exp123-exp1-colon_6b	NA	NA	NA	NA	NA	NA	NA	NA	NA	NA	NA	NA	NA	NA	NA	NA	NA	NA	NA	NA	NA	NA	NA	NA	NA	NA	NA	NA	NA	NA	19092.724	NA	NA	NA	NA	NA	NA	NA	NA	NA	NA	NA	NA	NA	NA	NA	NA	NA	NA
QC_exp1-colon_5e	78499.888	907381.956	1349148.016	55516.821	3756808.139	12659.181	1547.587	29456.906	3100929.223	195334.163	11024605.235	1082.942	NA	290355.284	23806853.218	350296.848	580012.385	1080.099	3861.21	3038822.756	721826.804	1374308.668	201894.916	1717690.583	135938.118	1278878.654	1034024.187	1196765.594	2457090.635	NA	23909.131	611228.17	1282425.849	26885.394	1048515.238	734236.957	247572.517	374894.87	6619576.977	82085.73	1329352.704	2094377.869	441743.291	704903.771	9017216.978	756642.083	842298.046	7954861.242	1076087.66
QC-exp1-colon_5c	NA	NA	NA	NA	NA	NA	NA	NA	NA	NA	NA	NA	161465.598	NA	NA	NA	NA	NA	NA	NA	NA	NA	NA	NA	NA	NA	NA	NA	NA	827403.063	NA	NA	NA	NA	NA	NA	NA	NA	NA	NA	NA	NA	NA	NA	NA	NA	NA	NA	NA
QC_exp1-colon_5f	78009.431	NA	NA	NA	NA	NA	NA	NA	NA	NA	NA	1854.992	NA	NA	NA	NA	605038.941	NA	NA	NA	NA	NA	NA	NA	NA	NA	NA	NA	2455946.901	NA	13952.266	NA	NA	25015.431	NA	736234.01	NA	NA	NA	NA	1272613.835	NA	NA	NA	NA	NA	NA	NA	NA
QC-exp1-colon_5d	NA	NA	NA	NA	NA	NA	NA	NA	NA	NA	NA	NA	164216.265	NA	NA	NA	NA	NA	NA	NA	NA	NA	NA	NA	NA	NA	NA	NA	NA	825441.741	NA	NA	NA	NA	NA	NA	NA	NA	NA	NA	NA	NA	NA	NA	NA	NA	NA	NA	NA
QC_exp3-colon_5a	65282.863	690807.536	1142811.971	41120.382	3107629.23	9709.292	1162.901	25548.776	2406942.414	157776.15	8959001.21	1375.965	NA	245658.42	17775712.489	239852.904	492486.112	931.089	2478.262	3534532.223	811959.328	1178854.553	126201.036	1200915.629	124830.433	1321515.49	778782.576	1965534.317	2134494.147	NA	17397.69	629948.079	1241991.251	42564.449	949042.018	831092.14	155891.386	210406.381	5552595.956	76227.484	1224949.085	3709123.749	387536.876	623985.774	8077140.064	657749.764	665761.325	7314152.389	960759.935
QC_exp1-colon_5g	74513.691	NA	NA	NA	NA	NA	NA	NA	NA	NA	NA	1803.964	NA	NA	NA	NA	561397.707	NA	NA	NA	NA	NA	NA	NA	NA	NA	NA	NA	2419441.161	NA	14769.461	NA	NA	38884.524	NA	736091.05	NA	NA	NA	NA	1262886.725	NA	NA	NA	NA	NA	NA	NA	NA
QC_exp3-colon_5d	67748.646	NA	NA	NA	NA	NA	NA	NA	NA	NA	NA	1722.742	NA	NA	NA	NA	494867.125	NA	NA	NA	NA	NA	NA	NA	NA	NA	NA	NA	2200500.606	NA	21672.843	NA	NA	43471.735	NA	868672.092	NA	NA	NA	NA	1237313.565	NA	NA	NA	NA	NA	NA	NA	NA
QC_exp2-colon_5a	90346.159	526756.056	547678.77	52089.717	2662960.074	10262.852	648.229	19498.363	2264667.42	162489.45	6489030.494	2456.866	NA	193852.306	14403252.085	344393.829	499879.437	857.573	1971.811	11231372.873	943342.139	1057386.146	91885.813	1022419.683	106983.089	938732.876	624027.748	3707014.636	2336699.509	NA	30286.051	481914.887	1142355.685	48861.514	871417.03	1282557.602	136289.632	178798.799	4552554.419	66070.561	1313605.909	7176762.662	330067.23	624851.789	8631520.411	391613.177	623840.399	5927539.541	918200.624
QC_exp3-colon_5b	67823.859	693576.155	1114270.623	43280.483	3291754.522	10781.252	451.291	25816.581	2766483.412	190952.302	9173915.636	1666.145	NA	250663.951	18162075.799	302987.478	484029.831	1319.36	2885.781	3816945.426	804298.577	1197368.1	163200.918	1399748.76	108161.637	1257640.708	824085.473	1866307.815	2144662.129	NA	15119.643	615422.942	1234846.864	41624.913	928145.775	844349.184	151472.494	278686.529	5971915.184	72645.374	1218698.166	3427685.129	392679.495	612738.521	8176680.98	682583.603	706241.221	7029302.377	959148.234
QC-exp1-colon_5e	NA	NA	NA	NA	NA	NA	NA	NA	NA	NA	NA	NA	163648.456	NA	NA	NA	NA	NA	NA	NA	NA	NA	NA	NA	NA	NA	NA	NA	NA	831948.001	NA	NA	NA	NA	NA	NA	NA	NA	NA	NA	NA	NA	NA	NA	NA	NA	NA	NA	NA
QC_exp2-colon_6a	NA	525569.898	514135.657	50486.465	2407284.4	9956.958	449.487	19980.623	2256884.401	172337.954	6537288.433	NA	NA	205255.82	14620228.312	275903.445	NA	1001.533	1983.529	11181917.252	929630.614	1110930.389	86910.168	1016713.987	103827.419	893709.441	640820.318	4370456.185	NA	NA	NA	473975.441	1144638.702	NA	863395.453	NA	106053.215	161608.763	4450394.105	63882.729	NA	8472711.877	332931.962	638302.475	8596947.725	415211.575	614633.048	5772065.861	899691.873
QC_exp1-colon_5h	76436.992	NA	NA	NA	NA	NA	NA	NA	NA	NA	NA	1865.956	NA	NA	NA	NA	588358.915	NA	NA	NA	NA	NA	NA	NA	NA	NA	NA	NA	2417860.655	NA	14151.131	NA	NA	36009.367	NA	759595.262	NA	NA	NA	NA	1257055.861	NA	NA	NA	NA	NA	NA	NA	NA
QC_exp3-colon_5e	75441.729	NA	NA	NA	NA	NA	NA	NA	NA	NA	NA	1620.971	NA	NA	NA	NA	504297.137	NA	NA	NA	NA	NA	NA	NA	NA	NA	NA	NA	2229722.492	NA	17982.824	NA	NA	39041.811	NA	889379.856	NA	NA	NA	NA	1218045.773	NA	NA	NA	NA	NA	NA	NA	NA
QC_exp2-colon_5b	96910.985	523357.641	540326.394	53469.294	2905841.758	10074.737	710.203	19513.787	2396285.51	177557.437	6535042.633	2052.275	NA	205022.245	15997705.018	351202.753	506462.399	801.051	2216.297	11660141.85	938147.43	1140947.982	103340.918	1098717.641	104838.826	861347.708	658388.459	3239925.503	2389412.11	NA	31233.453	485261.176	1172735.315	42840.357	883137.138	1268469.018	150630.765	212994.683	5095336.736	60900.063	1318997.803	6264596.398	334966.982	644231.416	8695451.283	407189.641	648601.084	5772128.764	932428.032
QC_exp3-colon_5c	67702.52	714938.548	1058197.586	42467.746	3483493.636	11343.579	970.537	24501.22	2759881.351	186890.464	8996296.946	1501.539	NA	242409.064	19423830.498	306858.984	509922.204	1111.779	3719.435	3727994.504	791146.293	1163400.72	158958.583	1402512.932	103493.183	1254957.264	843058.387	1760966.201	2186239.566	NA	18305.598	604931.138	1224611.662	24305.321	899089.133	861786.893	154143.699	291983.783	6123269.825	71200.497	1236851.107	3413238.92	390580.586	633718.982	8105233.246	685322.598	727098.097	6920473.416	929974.531
QC_exp2-colon_6b	NA	531006.813	478034.914	50611.1	2801035.988	10039.035	937.602	18178.099	2391484.248	166321.601	6590134.555	NA	NA	186498.204	17965604.296	355875.752	NA	741.346	2469.041	11319484.879	905444.688	1030212.024	99806.119	1120887.242	96947.453	887014.506	635514.558	3820017.619	NA	NA	NA	471113.512	1124553.907	NA	841784.074	NA	117392.474	198338.163	4842840.307	66098.157	NA	7469846.149	321360.567	625428.875	8504050.264	403977.882	648985.6	5506875.44	877764.585
QC-exp1-colon_5f	NA	NA	NA	NA	NA	NA	NA	NA	NA	NA	NA	NA	164845.793	NA	NA	NA	NA	NA	NA	NA	NA	NA	NA	NA	NA	NA	NA	NA	NA	834135.956	NA	NA	NA	NA	NA	NA	NA	NA	NA	NA	NA	NA	NA	NA	NA	NA	NA	NA	NA
QC_exp3-colon_5f	76982.093	NA	NA	NA	NA	NA	NA	NA	NA	NA	NA	1443.179	NA	NA	NA	NA	494356.99	NA	NA	NA	NA	NA	NA	NA	NA	NA	NA	NA	2200610.26	NA	21988.392	NA	NA	41286.677	NA	889318.163	NA	NA	NA	NA	1214376.66	NA	NA	NA	NA	NA	NA	NA	NA
QC_exp2-colon_5c	92975.976	535604.067	532007.444	55047.889	3487142.957	11782.779	457.981	19745.953	2502674.11	185296.792	6630476.188	2041.508	NA	195093.431	20825425.379	378677.716	502420.57	1107.723	3540.491	12185719.443	948842.599	1234684.395	114956.208	1167660.466	109611.893	881805.373	682518.126	2767382.82	2380866.248	NA	17467.54	510185.799	1197061.052	47414.055	893414.384	1234923.361	170412.046	240322.814	5300638.197	60721.645	1280738.777	5504837.81	335596.614	654158.161	8979427.43	417952.165	672757.126	5673283.795	938973.515
QC-exp1-colon_5g	NA	NA	NA	NA	NA	NA	NA	NA	NA	NA	NA	NA	167522.855	NA	NA	NA	NA	NA	NA	NA	NA	NA	NA	NA	NA	NA	NA	NA	NA	851056.144	NA	NA	NA	NA	NA	NA	NA	NA	NA	NA	NA	NA	NA	NA	NA	NA	NA	NA	NA
QC_exp2-colon_6c	NA	555261.189	465103.912	52470.018	2730337.161	11119.699	471.685	19674.593	2306188.057	172795.092	6433056.648	NA	NA	184616.394	16682304.999	349597.34	NA	930.383	2715.006	11508042.08	885135.957	1051770.644	96927.918	1102968.544	98330.628	893407.887	659596.994	3238780.752	NA	NA	NA	469874.307	1143258.787	NA	836161.652	NA	129522.619	201279.702	4761096.01	61678.086	NA	6361531.619	315016.702	624016.048	8404730.205	413456.575	657006.105	5183729.513	838372.438
QC_exp3-colon_5g	67299.607	NA	NA	NA	NA	NA	NA	NA	NA	NA	NA	1849.925	NA	NA	NA	NA	514661.316	NA	NA	NA	NA	NA	NA	NA	NA	NA	NA	NA	2185529.507	NA	21867.049	NA	NA	50572.63	NA	901184.196	NA	NA	NA	NA	1195732.442	NA	NA	NA	NA	NA	NA	NA	NA
QC-exp1-colon_5h	NA	NA	NA	NA	NA	NA	NA	NA	NA	NA	NA	NA	167989.508	NA	NA	NA	NA	NA	NA	NA	NA	NA	NA	NA	NA	NA	NA	NA	NA	883939.4	NA	NA	NA	NA	NA	NA	NA	NA	NA	NA	NA	NA	NA	NA	NA	NA	NA	NA	NA
QC_exp2-colon_6d	NA	584120.86	443462.077	52620.597	3381496.936	10932.495	707.784	17969.247	2347458.599	177129.887	6442718.702	NA	NA	187356.096	17506887.586	360493.43	NA	867.131	3002.5	11611006.647	855226.831	1083037.969	104769.81	1148779.679	111560.391	898966.919	682332.594	2648936.793	NA	NA	NA	484572.828	1155712.738	NA	872633.738	NA	149265.982	221109.94	5021060.377	63607.074	NA	5115900.684	304526.607	639553.538	8429909.07	399047.106	669865.715	4973637.448	832608.276
QC-exp3-colon_5a	NA	NA	NA	NA	NA	NA	NA	NA	NA	NA	NA	NA	160928.998	NA	NA	NA	NA	NA	NA	NA	NA	NA	NA	NA	NA	NA	NA	NA	NA	783544.282	NA	NA	NA	NA	NA	NA	NA	NA	NA	NA	NA	NA	NA	NA	NA	NA	NA	NA	NA
QC_exp2-colon_5d	92822.836	NA	NA	NA	NA	NA	NA	NA	NA	NA	NA	1734.663	NA	NA	NA	NA	500074.761	NA	NA	NA	NA	NA	NA	NA	NA	NA	NA	NA	2362171.869	NA	24744.317	NA	NA	43819.734	NA	1210350.401	NA	NA	NA	NA	1277979.692	NA	NA	NA	NA	NA	NA	NA	NA
QC_exp123-colon_post.bacolon1	64907.3	NA	NA	NA	NA	NA	NA	NA	NA	NA	NA	1463.396	NA	NA	NA	NA	420095.913	NA	NA	NA	NA	NA	NA	NA	NA	NA	NA	NA	1971431.13	NA	NA	NA	NA	24669.857	NA	878068.11	NA	NA	NA	NA	843360.631	NA	NA	NA	NA	NA	NA	NA	NA
QC_exp1-colon_5hb	79091.484	NA	NA	NA	NA	NA	NA	NA	NA	NA	NA	2247.289	NA	NA	NA	NA	574021.115	NA	NA	NA	NA	NA	NA	NA	NA	NA	NA	NA	2401455.704	NA	NA	NA	NA	38948.645	NA	748652.657	NA	NA	NA	NA	1236540.988	NA	NA	NA	NA	NA	NA	NA	NA
QC_exp123-colon_pre.bacolon2	65689.595	NA	NA	NA	NA	NA	NA	NA	NA	NA	NA	1525.987	NA	NA	NA	NA	446858.393	NA	NA	NA	NA	NA	NA	NA	NA	NA	NA	NA	2056073.858	NA	NA	NA	NA	31888.005	NA	918439.478	NA	NA	NA	NA	1035768.202	NA	NA	NA	NA	NA	NA	NA	NA
QC-exp3-colon_5b	NA	NA	NA	NA	NA	NA	NA	NA	NA	NA	NA	NA	161401.177	NA	NA	NA	NA	NA	NA	NA	NA	NA	NA	NA	NA	NA	NA	NA	NA	811200.501	NA	NA	NA	NA	NA	NA	NA	NA	NA	NA	NA	NA	NA	NA	NA	NA	NA	NA	NA
QC_exp2-colon_5e	96883.328	NA	NA	NA	NA	NA	NA	NA	NA	NA	NA	1905.62	NA	NA	NA	NA	529626.449	NA	NA	NA	NA	NA	NA	NA	NA	NA	NA	NA	2395236.483	NA	16489.902	NA	NA	33311.618	NA	1218813.469	NA	NA	NA	NA	1292633.164	NA	NA	NA	NA	NA	NA	NA	NA
QC-exp3-colon_5c	NA	NA	NA	NA	NA	NA	NA	NA	NA	NA	NA	NA	164648.66	NA	NA	NA	NA	NA	NA	NA	NA	NA	NA	NA	NA	NA	NA	NA	NA	832317.733	NA	NA	NA	NA	NA	NA	NA	NA	NA	NA	NA	NA	NA	NA	NA	NA	NA	NA	NA
QC_exp2-colon_5f	102585.321	NA	NA	NA	NA	NA	NA	NA	NA	NA	NA	1960.413	NA	NA	NA	NA	546353.995	NA	NA	NA	NA	NA	NA	NA	NA	NA	NA	NA	2506396.189	NA	21410.862	NA	NA	53620.572	NA	1223497.329	NA	NA	NA	NA	1299242.852	NA	NA	NA	NA	NA	NA	NA	NA
QC-exp3-colon_5d	NA	NA	NA	NA	NA	NA	NA	NA	NA	NA	NA	NA	165389.928	NA	NA	NA	NA	NA	NA	NA	NA	NA	NA	NA	NA	NA	NA	NA	NA	856564.879	NA	NA	NA	NA	NA	NA	NA	NA	NA	NA	NA	NA	NA	NA	NA	NA	NA	NA	NA
QC_exp3-colon_6a	NA	743763.602	1006966.727	42107.336	3149982.817	9633.846	1220.065	25392.284	2647711.508	192042.728	9232020.874	NA	NA	265904.278	17282693.465	254571.245	NA	813.45	2754.548	3679715.587	778771.041	1177654.832	144819.767	1361425.937	119985.11	1397433.717	853266.076	2332604.959	NA	NA	NA	659627.629	1320306.569	NA	957465.469	NA	128790.003	252815.319	5653774.184	82686.802	NA	4354852.587	382885.162	646848.571	8052407.381	699239.507	733113.873	6392713.009	897007.638
QC_exp2-colon_5g	110115.991	NA	NA	NA	NA	NA	NA	NA	NA	NA	NA	2603.344	NA	NA	NA	NA	573040.132	NA	NA	NA	NA	NA	NA	NA	NA	NA	NA	NA	2605545.952	NA	17480.624	NA	NA	31556.099	NA	1235270.61	NA	NA	NA	NA	1302212.125	NA	NA	NA	NA	NA	NA	NA	NA
QC-exp3-colon_5e	NA	NA	NA	NA	NA	NA	NA	NA	NA	NA	NA	NA	166531.908	NA	NA	NA	NA	NA	NA	NA	NA	NA	NA	NA	NA	NA	NA	NA	NA	862110.977	NA	NA	NA	NA	NA	NA	NA	NA	NA	NA	NA	NA	NA	NA	NA	NA	NA	NA	NA
QC_exp3-colon_6b	NA	756375.378	924738.312	40779.532	3299307.609	9967.923	519.893	23298.643	2528277.286	180273.622	8898852.011	NA	NA	234555.37	18542490.335	267874.31	NA	1332.631	3556.202	3594430.46	744384.846	1097672.71	140858.086	1330732.257	114015.148	1314491.543	837425.633	1944562.174	NA	NA	NA	623038.833	1237743.983	NA	899306.721	NA	127841.536	231795.565	5760288.36	74035.838	NA	3683924.336	355994.434	612757.823	7669872.918	665579.606	708875.403	6054570.957	850053.384
QC_exp3-colon_6c	NA	766779.459	854882.372	40421.495	3405548.156	10510.368	698.661	25138.261	2609777.434	176502.69	8633444.532	NA	NA	225379.033	18719671.455	275009.088	NA	874.769	3578.931	3611628.195	630205.292	1070439.236	148750.755	1401429.343	105538.553	1275337.566	825559.286	1744723.993	NA	NA	NA	588187.662	1191806.517	NA	871919.959	NA	128383.238	252372.414	5651419.12	74386.662	NA	3287328.891	351145.709	593120.665	7599544.121	645635.5	709807.042	5828213.698	813370.732
QC-exp3-colon_5f	NA	NA	NA	NA	NA	NA	NA	NA	NA	NA	NA	NA	161940.92	NA	NA	NA	NA	NA	NA	NA	NA	NA	NA	NA	NA	NA	NA	NA	NA	817441.261	NA	NA	NA	NA	NA	NA	NA	NA	NA	NA	NA	NA	NA	NA	NA	NA	NA	NA	NA
QC-exp3-colon_5g	NA	NA	NA	NA	NA	NA	NA	NA	NA	NA	NA	NA	166129.554	NA	NA	NA	NA	NA	NA	NA	NA	NA	NA	NA	NA	NA	NA	NA	NA	832767.453	NA	NA	NA	NA	NA	NA	NA	NA	NA	NA	NA	NA	NA	NA	NA	NA	NA	NA	NA
QC_exp3-colon_6d	NA	786573.604	802529.147	39835.253	3427923.839	10805.874	1674.733	23325.985	2398329.092	162177.19	8570198.762	NA	NA	216384.669	20354787.146	245391.838	NA	1032.74	3200.132	3579531.585	730055.805	1081746.209	133873.57	1337054.641	108393.699	1203359.107	813855.657	1460760.536	NA	NA	NA	565064.354	1150091.574	NA	865691.674	NA	132990.182	249331.347	5903452.376	70005.338	NA	2729884.559	338071.081	621338.381	7537256.083	670089.125	687303.145	5674196.803	784195.067
QC_exp123-colon_post.bacolon2	80361.127	NA	NA	NA	NA	NA	NA	NA	NA	NA	NA	1919.865	NA	NA	NA	NA	508823.225	NA	NA	NA	NA	NA	NA	NA	NA	NA	NA	NA	2357679.704	NA	NA	NA	NA	24310.809	NA	902761.576	NA	NA	NA	NA	1111417.998	NA	NA	NA	NA	NA	NA	NA	NA
[truncated: 245 more rows]
[truncated: 102 more columns]

## Sheet: AreaCorrLog2Cen
Sid	12-dehydrocholic acid@5.38-ba	2-hydroxybutyric acid@7.23-gc	2-hydroxyglutaric acid@13.01-gc	2-oxoglutaric acid@13.01-gc	3-hydroxybutyric acid@7.41-gc	3-hydroxyisovaleric acid@7.82-gc	3-methylhistidine@16.86-gc	4-hydroxymandelic acid@15.23-gc	4-hydroxyproline@12.44-gc	5-aminovaleric acid@13.53-gc	5-oxoproline@12.35-gc	7,12-dihydroxy-3-oxocholanoic acid@7.11-ba	Acetic acid@1.78-sf	Adenine@16.19-gc	Alanine@6.92-gc	Allantoin@16.54-gc	Alpha-muricholic acid@6.00-ba	Alpha-tocopherol@29.51-gc	Anthranilic acid@13.43-gc	Arabinose@14.17-gc	Arabitol@14.82-gc	Arachidonic acid@23.75-gc	Asparagine@14.13-gc	Aspartic acid@12.37-gc	Behenic acid@26.41-gc	Benzoic acid@8.76-gc	Beta-alanine@11.16-gc	Beta-hydroxypyruvic acid@5.45-gc	Beta-muricholic acid@6.27-ba	Butanoic acid@5.24-sf	Cadaverine@4.45-pa	Capric acid@11.44-gc	Caprylic acid@8.95-gc	Chenodeoxycholic acid@10.32-ba	Cholesterol@29.51-gc	Cholic acid@9.13-ba	Citric acid;Isocitric acid@15.81-gc	Citrulline@15.78-gc	Creatine@12.80-gc	Cytosine@12.37-gc	Deoxycholic acid@10.54-ba	Dimethylglycine@5.45-gc	Erythritol@12.29-gc	Ferulic acid@19.20-gc	Fructose@16.48-gc	Fumaric acid@10.06-gc	GABA@12.44-gc	Galactitol;Sorbitol;Mannitol@17.29-gc	Galactose;Glucose;Mannose@17.01-gc
[truncated: 321 more rows]
[truncated: 102 more columns]

[truncated: 3 more sheets: RatioInfos, Ratio, RatioLog2Cen]
