# Supplementary material for: Oral administration of Akkermansia muciniphila elevates systemic antiaging and anticancer metabolites
Source: Aging (Albany NY). 2021 Mar 2;13(5):6375–405. doi: 10.18632/aging.202739 (PMC7993698; doi:10.18632/aging.202739)
Supplement: Supplementary Table 3 [file aging-13-202739-s004.xlsx]

## Sheet: SampleInfos
Supplementary Table 3. Related to Figure 2 and Supplementary Figure 4. Targeted metabolomics analysis from LIVER samples from mice receiving oral gavages with several commensals or PBS (control), or continuous ATB, at days 3, 7 and 14 after the first oral gavage.
Sid	sType	InjOrder	Grp	Color
BlM-exp2-liver_pre	Bl	5	-	-
BlM_exp3-liver_pre	Bl	7	-	-
BlM-exp2-liver_post	Bl	74	-	-
BlM_exp3-liver_post	Bl	83	-	-
BlM-exp3-liver_pre	Bl	87	-	-
Bl_matrice-exp1-liver_3a	Bl	88	-	-
Bl_matrice-exp2-liver_pre	Bl	103	-	-
BlM_exp1-liver_pre	Bl	129	-	-
BlM-exp3-liver_post	Bl	194	-	-
BlM-exp1-liver_pre	Bl	202	-	-
Bl_matrice-exp2-liver_post	Bl	219	-	-
Bl_matrice-exp1-liver_3b	Bl	251	-	-
BlM_pre-exp2-liver	Bl	261	-	-
BlM_exp2-liver_pre	Bl	265	-	-
BlM_exp1-liver_post	Bl	314	-	-
BlM-exp1-liver_post	Bl	321	-	-
BlM_exp2-liver_post	Bl	324	-	-
BlM_post-exp2-liver	Bl	325	-	-
QC-exp2-liver_5a	QC	8	QC	#737373
QC_exp3-liver_5a	QC	9	QC	#737373
QC_exp123-liver_6a	QC	10	QC	#737373
QC_exp3-liver_5b	QC	11	QC	#737373
QC-exp2-liver_5b	QC	12	QC	#737373
QC-exp2-liver_5c	QC	16	QC	#737373
QC_exp3-liver_5c	QC	17	QC	#737373
QC-exp2-liver_5d	QC	27	QC	#737373
QC_exp3-liver_6a	QC	30	QC	#737373
QC-exp2-liver_5e	QC	39	QC	#737373
QC_exp3-liver_6b	QC	43	QC	#737373
QC_exp3-liver_5d	QC	45	QC	#737373
QC_exp3-liver_5e	QC	46	QC	#737373
QC-exp2-liver_5f	QC	55	QC	#737373
QC_exp3-liver_6c	QC	58	QC	#737373
QC_exp3-liver_5f	QC	59	QC	#737373
QC-exp2-liver_5g	QC	71	QC	#737373
QC_exp3-liver_5g	QC	72	QC	#737373
QC_exp123-liver_6b	QC	75	QC	#737373
QC_exp3-liver_6d	QC	76	QC	#737373
QC_exp3-liver_5h	QC	89	QC	#737373
QC-exp3-liver_5a	QC	92	QC	#737373
QC_exp123-liver_6bb	QC	93	QC	#737373
QC_exp123-liver_pre.baliver2	QC	105	QC	#737373
QC-exp3-liver_5b	QC	109	QC	#737373
QC-exp3-liver_5c	QC	114	QC	#737373
QC_exp1-liver_5a	QC	115	QC	#737373
QC-exp3-liver_5d	QC	119	QC	#737373
QC_exp1-liver_5b	QC	127	QC	#737373
QC-exp3-liver_5e	QC	137	QC	#737373
QC_exp1-liver_6a	QC	149	QC	#737373
QC_exp1-liver_5c	QC	154	QC	#737373
QC-exp3-liver_5f	QC	164	QC	#737373
QC_exp1-liver_6b	QC	174	QC	#737373
QC_exp2-liver_5a	QC	180	QC	#737373
QC_exp1-liver_5d	QC	183	QC	#737373
QC-exp3-liver_5g	QC	191	QC	#737373
QC_exp1-liver_6c	QC	203	QC	#737373
QC-exp1-liver_5a	QC	206	QC	#737373
QC_exp2-liver_5b	QC	211	QC	#737373
QC_exp123-liver_post.baliver2	QC	216	QC	#737373
QC_exp1-liver_5gb	QC	225	QC	#737373
QC_exp1-liver_5gc	QC	229	QC	#737373
QC_exp1-liver_5gd	QC	233	QC	#737373
QC_exp123-liver_pre.baliver1	QC	238	QC	#737373
QC_exp2-liver_5c	QC	242	QC	#737373
QC-exp1-liver_5b	QC	244	QC	#737373
QC_exp1-liver_6d	QC	245	QC	#737373
QC_exp1-liver_5e	QC	255	QC	#737373
QC_exp2-liver_5e	QC	263	QC	#737373
QC-exp1-liver_5c	QC	277	QC	#737373
QC_exp1-liver_5f	QC	283	QC	#737373
QC_exp2-liver_5f	QC	285	QC	#737373
QC_exp2-liver_5d	QC	290	QC	#737373
QC-exp1-liver_5d	QC	293	QC	#737373
QC_exp1-liver_5g	QC	298	QC	#737373
QC_exp2-liver_5g	QC	305	QC	#737373
QC-exp1-liver_5e	QC	309	QC	#737373
QC_exp2-liver_6a	QC	310	QC	#737373
QC_exp1-liver_5h	QC	313	QC	#737373
QC_exp2-liver_6b	QC	315	QC	#737373
QC-exp1-liver_5f	QC	316	QC	#737373
QC_exp2-liver_6c	QC	317	QC	#737373
QC-exp1-liver_5g	QC	318	QC	#737373
QC-exp1-liver_5h	QC	319	QC	#737373
QC-exp1-liver_4f	QC	320	QC	#737373
QC_exp2-liver_6d	QC	323	QC	#737373
QC_exp123-liver_post.baliver1	QC	328	QC	#737373
Nacl-j3-exp3-liver_3	Sa	13	Nacl j3 exp3 liver	#41AB5D
FECES-j3-exp3-liver_16	Sa	14	FECES j3 exp3 liver	#DF65B0
ATB-j7-exp3-liver_33	Sa	15	ATB j7 exp3 liver	#EF3B2C
AKKERMANSIA-j14-exp3-liver_63	Sa	18	AKKER j14 exp3 liver	#4D9221
Nacl-j7-exp3-liver_27	Sa	19	Nacl j7 exp3 liver	#006D2C
ATB-j3-exp3-liver_9	Sa	20	ATB j3 exp3 liver	#FB6A4A
FECES-j7-exp3-liver_40	Sa	21	FECES j7 exp3 liver	#BB3279
AKKERMANSIA-j3-exp3-liver_22	Sa	22	AKKER j3 exp3 liver	#B8E186
ATB-j14-exp3-liver_50	Sa	23	ATB j14 exp3 liver	#A50F15
FECES-j14-exp3-liver_59	Sa	24	FECES j14 exp3 liver	#980043
Nacl-j3-exp3-liver_5	Sa	25	Nacl j3 exp3 liver	#41AB5D
AKKERMANSIA-j7-exp3-liver_43	Sa	26	AKKER j7 exp3 liver	#7FBC41
FECES-j7-exp3-liver_37	Sa	28	FECES j7 exp3 liver	#BB3279
ATB-j3-exp3-liver_8	Sa	29	ATB j3 exp3 liver	#FB6A4A
AKKERMANSIA-j14-exp3-liver_65	Sa	31	AKKER j14 exp3 liver	#4D9221
Nacl-j7-exp3-liver_26	Sa	32	Nacl j7 exp3 liver	#006D2C
FECES-j3-exp3-liver_14	Sa	33	FECES j3 exp3 liver	#DF65B0
AKKERMANSIA-j3-exp3-liver_20	Sa	34	AKKER j3 exp3 liver	#B8E186
ATB-j7-exp3-liver_32	Sa	35	ATB j7 exp3 liver	#EF3B2C
Nacl-j3-exp3-liver_4	Sa	36	Nacl j3 exp3 liver	#41AB5D
AKKERMANSIA-j14-exp3-liver_61	Sa	37	AKKER j14 exp3 liver	#4D9221
ATB-j3-exp3-liver_11	Sa	38	ATB j3 exp3 liver	#FB6A4A
FECES-j7-exp3-liver_41	Sa	40	FECES j7 exp3 liver	#BB3279
AKKERMANSIA-j7-exp3-liver_46	Sa	41	AKKER j7 exp3 liver	#7FBC41
ATB-j14-exp3-liver_53	Sa	42	ATB j14 exp3 liver	#A50F15
Nacl-j7-exp3-liver_28	Sa	44	Nacl j7 exp3 liver	#006D2C
FECES-j14-exp3-liver_58	Sa	47	FECES j14 exp3 liver	#980043
ATB-j7-exp3-liver_35	Sa	48	ATB j7 exp3 liver	#EF3B2C
AKKERMANSIA-j3-exp3-liver_19	Sa	49	AKKER j3 exp3 liver	#B8E186
FECES-j7-exp3-liver_38	Sa	50	FECES j7 exp3 liver	#BB3279
Nacl-j3-exp3-liver_6	Sa	51	Nacl j3 exp3 liver	#41AB5D
AKKERMANSIA-j14-exp3-liver_64	Sa	52	AKKER j14 exp3 liver	#4D9221
FECES-j3-exp3-liver_17	Sa	53	FECES j3 exp3 liver	#DF65B0
ATB-j3-exp3-liver_7	Sa	54	ATB j3 exp3 liver	#FB6A4A
FECES-j14-exp3-liver_60	Sa	56	FECES j14 exp3 liver	#980043
AKKERMANSIA-j7-exp3-liver_44	Sa	57	AKKER j7 exp3 liver	#7FBC41
Nacl-j3-exp3-liver_2	Sa	60	Nacl j3 exp3 liver	#41AB5D
ATB-j14-exp3-liver_52	Sa	61	ATB j14 exp3 liver	#A50F15
AKKERMANSIA-j3-exp3-liver_23	Sa	62	AKKER j3 exp3 liver	#B8E186
FECES-j7-exp3-liver_39	Sa	63	FECES j7 exp3 liver	#BB3279
ATB-j7-exp3-liver_34	Sa	64	ATB j7 exp3 liver	#EF3B2C
AKKERMANSIA-j14-exp3-liver_62	Sa	65	AKKER j14 exp3 liver	#4D9221
Nacl-j7-exp3-liver_25	Sa	66	Nacl j7 exp3 liver	#006D2C
FECES-j3-exp3-liver_15	Sa	67	FECES j3 exp3 liver	#DF65B0
AKKERMANSIA-j7-exp3-liver_45	Sa	68	AKKER j7 exp3 liver	#7FBC41
AKKERMANSIA-j14-exp3-liver_66	Sa	69	AKKER j14 exp3 liver	#4D9221
FECES-j7-exp3-liver_42	Sa	70	FECES j7 exp3 liver	#BB3279
ATB-j14-exp3-liver_51	Sa	73	ATB j14 exp3 liver	#A50F15
Nacl-j7-exp3-liver_30	Sa	77	Nacl j7 exp3 liver	#006D2C
AKKERMANSIA-j3-exp3-liver_21	Sa	80	AKKER j3 exp3 liver	#B8E186
ATB-j3-exp3-liver_10	Sa	85	ATB j3 exp3 liver	#FB6A4A
ATB-j7-exp3-liver_31	Sa	86	ATB j7 exp3 liver	#EF3B2C
FECES-j14-exp3-liver_55	Sa	91	FECES j14 exp3 liver	#980043
Nacl-j3-exp3-liver_1	Sa	94	Nacl j3 exp3 liver	#41AB5D
ATB-j14-exp3-liver_54	Sa	96	ATB j14 exp3 liver	#A50F15
AKKERMANSIA-j7-exp3-liver_47	Sa	98	AKKER j7 exp3 liver	#7FBC41
FECES-j3-exp3-liver_13	Sa	100	FECES j3 exp3 liver	#DF65B0
ATB-j7-exp3-liver_36	Sa	102	ATB j7 exp3 liver	#EF3B2C
Nacl-j7-exp3-liver_29	Sa	104	Nacl j7 exp3 liver	#006D2C
FECES-j14-exp3-liver_56	Sa	106	FECES j14 exp3 liver	#980043
ATB-j3-exp3-liver_12	Sa	107	ATB j3 exp3 liver	#FB6A4A
AKKERMANSIA-j3-exp3-liver_24	Sa	108	AKKER j3 exp3 liver	#B8E186
ATB-j14-exp3-liver_49	Sa	110	ATB j14 exp3 liver	#A50F15
FECES-j3-exp3-liver_18	Sa	111	FECES j3 exp3 liver	#DF65B0
AKKERMANSIA-j7-exp3-liver_48	Sa	112	AKKER j7 exp3 liver	#7FBC41
FECES-j14-exp3-liver_57	Sa	113	FECES j14 exp3 liver	#980043
Nacl-j3-exp2-liver_2	Sa	116	Nacl j3 exp2 liver	#41AB5D
MITSUAKI-j3-exp2-liver_22	Sa	117	MITSUAKI j3 exp2 liver	#FD8D3C
ATB-j7-exp2-liver_34	Sa	118	ATB j7 exp2 liver	#EF3B2C
MITSUAKI-j7-exp2-liver_46	Sa	120	MITSUAKI j7 exp2 liver	#D1611F
BURKO-j3-exp2-liver_16	Sa	121	BURKO j3 exp2 liver	#80CDC1
ATB-j14-exp2-liver_53	Sa	122	ATB j14 exp2 liver	#A50F15
Nacl-j7-exp2-liver_29	Sa	123	Nacl j7 exp2 liver	#006D2C
BURKO-j14-exp2-liver_59	Sa	124	BURKO j14 exp2 liver	#01665E
BURKO-j7-exp2-liver_40	Sa	125	BURKO j7 exp2 liver	#40998F
HIRAE-j14-exp1-liver_67	Sa	126	HIRAE j14 exp1 liver	#54278F
BURKO-j3-exp2-liver_15	Sa	128	BURKO j3 exp2 liver	#80CDC1
ATB-j7-exp1-liver_39	Sa	130	ATB j7 exp1 liver	#EF3B2C
Nacl-j3-exp2-liver_5	Sa	131	Nacl j3 exp2 liver	#41AB5D
HIRAE-j14-exp1-liver_71	Sa	132	HIRAE j14 exp1 liver	#54278F
ATB-j3-exp2-liver_9	Sa	133	ATB j3 exp2 liver	#FB6A4A
Nacl-j7-exp1-liver_31	Sa	134	Nacl j7 exp1 liver	#006D2C
MITSUAKI-j3-exp2-liver_21	Sa	135	MITSUAKI j3 exp2 liver	#FD8D3C
FRAGILIS-j7-exp1-liver_53	Sa	136	FRAGILIS j7 exp1 liver	#B58943
BURKO-j7-exp2-liver_39	Sa	138	BURKO j7 exp2 liver	#40998F
BARNECIELA-j14-exp1-liver_84	Sa	139	BARNECIELA j14 exp1 liver	#08519C
ATB-j7-exp2-liver_33	Sa	140	ATB j7 exp2 liver	#EF3B2C
ATB-j14-exp1-liver_64	Sa	141	ATB j14 exp1 liver	#A50F15
MITSUAKI-j14-exp2-liver_64	Sa	142	MITSUAKI j14 exp2 liver	#A63603
FRAGILIS-j7-exp1-liver_49	Sa	143	FRAGILIS j7 exp1 liver	#B58943
ATB-j3-exp2-liver_10	Sa	144	ATB j3 exp2 liver	#FB6A4A
BURKO-j14-exp2-liver_58	Sa	145	BURKO j14 exp2 liver	#01665E
BARNECIELA-j14-exp1-liver_79	Sa	146	BARNECIELA j14 exp1 liver	#08519C
ATB-j14-exp2-liver_52	Sa	147	ATB j14 exp2 liver	#A50F15
ATB-j3-exp1-liver_7	Sa	148	ATB j3 exp1 liver	#FB6A4A
Nacl-j7-exp2-liver_27	Sa	150	Nacl j7 exp2 liver	#006D2C
ATB-j3-exp1-liver_11	Sa	151	ATB j3 exp1 liver	#FB6A4A
ATB-j7-exp1-liver_41	Sa	152	ATB j7 exp1 liver	#EF3B2C
ATB-j3-exp2-liver_8	Sa	153	ATB j3 exp2 liver	#FB6A4A
BURKO-j14-exp2-liver_57	Sa	155	BURKO j14 exp2 liver	#01665E
BARNECIELA-j3-exp1-liver_25	Sa	156	BARNECIELA j3 exp1 liver	#6BAED6
MITSUAKI-j14-exp2-liver_65	Sa	157	MITSUAKI j14 exp2 liver	#A63603
Nacl-j3-exp2-liver_3	Sa	158	Nacl j3 exp2 liver	#41AB5D
HIRAE-j3-exp1-liver_17	Sa	159	HIRAE j3 exp1 liver	#9E9AC8
MITSUAKI-j3-exp2-liver_24	Sa	160	MITSUAKI j3 exp2 liver	#FD8D3C
ATB-j14-exp1-liver_62	Sa	161	ATB j14 exp1 liver	#A50F15
ATB-j3-exp2-liver_12	Sa	162	ATB j3 exp2 liver	#FB6A4A
BARNECIELA-j7-exp1-liver_57	Sa	163	BARNECIELA j7 exp1 liver	#397FB9
BURKO-j3-exp2-liver_18	Sa	165	BURKO j3 exp2 liver	#80CDC1
HIRAE-j7-exp1-liver_45	Sa	166	HIRAE j7 exp1 liver	#7960AB
MITSUAKI-j7-exp2-liver_45	Sa	167	MITSUAKI j7 exp2 liver	#D1611F
FRAGILIS-j14-exp1-liver_75	Sa	168	FRAGILIS j14 exp1 liver	#DFC27D
Nacl-j7-exp2-liver_28	Sa	169	Nacl j7 exp2 liver	#006D2C
Nacl-j7-exp1-liver_35	Sa	170	Nacl j7 exp1 liver	#006D2C
MITSUAKI-j7-exp2-liver_47	Sa	171	MITSUAKI j7 exp2 liver	#D1611F
HIRAE-j7-exp1-liver_47	Sa	172	HIRAE j7 exp1 liver	#7960AB
FRAGILIS-j3-exp1-liver_21	Sa	173	FRAGILIS j3 exp1 liver	#8C510A
MITSUAKI-j14-exp2-liver_63	Sa	175	MITSUAKI j14 exp2 liver	#A63603
Nacl-j3-exp1-liver_1	Sa	176	Nacl j3 exp1 liver	#41AB5D
ATB-j7-exp2-liver_32	Sa	177	ATB j7 exp2 liver	#EF3B2C
HIRAE-j3-exp1-liver_15	Sa	178	HIRAE j3 exp1 liver	#9E9AC8
BURKO-j7-exp2-liver_38	Sa	179	BURKO j7 exp2 liver	#40998F
Nacl-j7-exp2-liver_26	Sa	181	Nacl j7 exp2 liver	#006D2C
FRAGILIS-j14-exp1-liver_76	Sa	182	FRAGILIS j14 exp1 liver	#DFC27D
ATB-j7-exp2-liver_35	Sa	184	ATB j7 exp2 liver	#EF3B2C
FRAGILIS-j7-exp1-liver_54	Sa	185	FRAGILIS j7 exp1 liver	#B58943
BURKO-j3-exp2-liver_14	Sa	186	BURKO j3 exp2 liver	#80CDC1
FRAGILIS-j3-exp1-liver_22	Sa	187	FRAGILIS j3 exp1 liver	#8C510A
BARNECIELA-j7-exp1-liver_58	Sa	188	BARNECIELA j7 exp1 liver	#397FB9
MITSUAKI-j3-exp2-liver_20	Sa	189	MITSUAKI j3 exp2 liver	#FD8D3C
Nacl-j3-exp1-liver_3	Sa	190	Nacl j3 exp1 liver	#41AB5D
BURKO-j7-exp2-liver_42	Sa	192	BURKO j7 exp2 liver	#40998F
ATB-j14-exp1-liver_65	Sa	193	ATB j14 exp1 liver	#A50F15
ATB-j14-exp2-liver_50	Sa	195	ATB j14 exp2 liver	#A50F15
Nacl-j7-exp1-liver_33	Sa	196	Nacl j7 exp1 liver	#006D2C
ATB-j3-exp1-liver_9	Sa	198	ATB j3 exp1 liver	#FB6A4A
MITSUAKI-j7-exp2-liver_44	Sa	200	MITSUAKI j7 exp2 liver	#D1611F
HIRAE-j7-exp1-liver_43	Sa	201	HIRAE j7 exp1 liver	#7960AB
ATB-j14-exp2-liver_51	Sa	204	ATB j14 exp2 liver	#A50F15
Nacl-j3-exp1-liver_5	Sa	205	Nacl j3 exp1 liver	#41AB5D
BURKO-j14-exp2-liver_56	Sa	207	BURKO j14 exp2 liver	#01665E
FRAGILIS-j14-exp1-liver_73	Sa	208	FRAGILIS j14 exp1 liver	#DFC27D
Nacl-j3-exp2-liver_4	Sa	209	Nacl j3 exp2 liver	#41AB5D
MITSUAKI-j14-exp2-liver_62	Sa	210	MITSUAKI j14 exp2 liver	#A63603
FRAGILIS-j14-exp1-liver_78	Sa	212	FRAGILIS j14 exp1 liver	#DFC27D
ATB-j3-exp2-liver_11	Sa	213	ATB j3 exp2 liver	#FB6A4A
BURKO-j7-exp2-liver_37	Sa	214	BURKO j7 exp2 liver	#40998F
FRAGILIS-j7-exp1-liver_51	Sa	215	FRAGILIS j7 exp1 liver	#B58943
ATB-j7-exp2-liver_36	Sa	217	ATB j7 exp2 liver	#EF3B2C
Nacl-j3-exp1-liver_2	Sa	218	Nacl j3 exp1 liver	#41AB5D
Nacl-j7-exp2-liver_25	Sa	220	Nacl j7 exp2 liver	#006D2C
FRAGILIS-j3-exp1-liver_23	Sa	221	FRAGILIS j3 exp1 liver	#8C510A
BURKO-j3-exp2-liver_13	Sa	223	BURKO j3 exp2 liver	#80CDC1
HIRAE-j14-exp1-liver_72	Sa	224	HIRAE j14 exp1 liver	#54278F
Nacl-j3-exp2-liver_1	Sa	227	Nacl j3 exp2 liver	#41AB5D
ATB-j7-exp1-liver_37	Sa	228	ATB j7 exp1 liver	#EF3B2C
ATB-j3-exp2-liver_7	Sa	231	ATB j3 exp2 liver	#FB6A4A
FRAGILIS-j3-exp1-liver_19	Sa	232	FRAGILIS j3 exp1 liver	#8C510A
MITSUAKI-j3-exp2-liver_19	Sa	235	MITSUAKI j3 exp2 liver	#FD8D3C
ATB-j14-exp1-liver_63	Sa	236	ATB j14 exp1 liver	#A50F15
ATB-j7-exp1-liver_38	Sa	237	ATB j7 exp1 liver	#EF3B2C
ATB-j7-exp2-liver_31	Sa	239	ATB j7 exp2 liver	#EF3B2C
BARNECIELA-j7-exp1-liver_55	Sa	240	BARNECIELA j7 exp1 liver	#397FB9
BURKO-j14-exp2-liver_55	Sa	241	BURKO j14 exp2 liver	#01665E
BARNECIELA-j3-exp1-liver_28	Sa	243	BARNECIELA j3 exp1 liver	#6BAED6
Nacl-j3-exp2-liver_6	Sa	246	Nacl j3 exp2 liver	#41AB5D
Nacl-j7-exp1-liver_34	Sa	247	Nacl j7 exp1 liver	#006D2C
ATB-j14-exp2-liver_54	Sa	248	ATB j14 exp2 liver	#A50F15
Nacl-j3-exp1-liver_4	Sa	249	Nacl j3 exp1 liver	#41AB5D
MITSUAKI-j14-exp2-liver_61	Sa	250	MITSUAKI j14 exp2 liver	#A63603
MITSUAKI-j3-exp2-liver_23	Sa	253	MITSUAKI j3 exp2 liver	#FD8D3C
BARNECIELA-j7-exp1-liver_59	Sa	254	BARNECIELA j7 exp1 liver	#397FB9
BURKO-j14-exp2-liver_60	Sa	258	BURKO j14 exp2 liver	#01665E
HIRAE-j7-exp1-liver_46	Sa	259	HIRAE j7 exp1 liver	#7960AB
MITSUAKI-j7-exp2-liver_48	Sa	262	MITSUAKI j7 exp2 liver	#D1611F
HIRAE-j3-exp1-liver_16	Sa	264	HIRAE j3 exp1 liver	#9E9AC8
BURKO-j7-exp2-liver_41	Sa	266	BURKO j7 exp2 liver	#40998F
BARNECIELA-j3-exp1-liver_29	Sa	267	BARNECIELA j3 exp1 liver	#6BAED6
Nacl-j7-exp2-liver_30	Sa	268	Nacl j7 exp2 liver	#006D2C
HIRAE-j3-exp1-liver_13	Sa	269	HIRAE j3 exp1 liver	#9E9AC8
MITSUAKI-j7-exp2-liver_43	Sa	270	MITSUAKI j7 exp2 liver	#D1611F
HIRAE-j14-exp1-liver_69	Sa	271	HIRAE j14 exp1 liver	#54278F
ATB-j14-exp2-liver_49	Sa	272	ATB j14 exp2 liver	#A50F15
BARNECIELA-j14-exp1-liver_80	Sa	273	BARNECIELA j14 exp1 liver	#08519C
BURKO-j3-exp2-liver_17	Sa	274	BURKO j3 exp2 liver	#80CDC1
BARNECIELA-j14-exp1-liver_83	Sa	275	BARNECIELA j14 exp1 liver	#08519C
MITSUAKI-j14-exp2-liver_66	Sa	276	MITSUAKI j14 exp2 liver	#A63603
ATB-j3-exp1-liver_10	Sa	278	ATB j3 exp1 liver	#FB6A4A
HIRAE-j3-exp1-liver_14	Sa	279	HIRAE j3 exp1 liver	#9E9AC8
FRAGILIS-j14-exp1-liver_77	Sa	280	FRAGILIS j14 exp1 liver	#DFC27D
ATB-j7-exp1-liver_40	Sa	281	ATB j7 exp1 liver	#EF3B2C
Nacl-j3-exp1-liver_6	Sa	282	Nacl j3 exp1 liver	#41AB5D
ATB-j7-exp1-liver_42	Sa	284	ATB j7 exp1 liver	#EF3B2C
HIRAE-j14-exp1-liver_68	Sa	286	HIRAE j14 exp1 liver	#54278F
ATB-j3-exp1-liver_8	Sa	287	ATB j3 exp1 liver	#FB6A4A
HIRAE-j7-exp1-liver_44	Sa	288	HIRAE j7 exp1 liver	#7960AB
FRAGILIS-j3-exp1-liver_20	Sa	289	FRAGILIS j3 exp1 liver	#8C510A
BARNECIELA-j7-exp1-liver_56	Sa	291	BARNECIELA j7 exp1 liver	#397FB9
Nacl-j7-exp1-liver_36	Sa	292	Nacl j7 exp1 liver	#006D2C
FRAGILIS-j3-exp1-liver_24	Sa	294	FRAGILIS j3 exp1 liver	#8C510A
ATB-j14-exp1-liver_66	Sa	295	ATB j14 exp1 liver	#A50F15
BARNECIELA-j14-exp1-liver_81	Sa	296	BARNECIELA j14 exp1 liver	#08519C
BARNECIELA-j3-exp1-liver_30	Sa	297	BARNECIELA j3 exp1 liver	#6BAED6
HIRAE-j7-exp1-liver_48	Sa	299	HIRAE j7 exp1 liver	#7960AB
HIRAE-j3-exp1-liver_18	Sa	300	HIRAE j3 exp1 liver	#9E9AC8
FRAGILIS-j14-exp1-liver_74	Sa	301	FRAGILIS j14 exp1 liver	#DFC27D
BARNECIELA-j3-exp1-liver_26	Sa	302	BARNECIELA j3 exp1 liver	#6BAED6
FRAGILIS-j7-exp1-liver_50	Sa	303	FRAGILIS j7 exp1 liver	#B58943
FRAGILIS-j7-exp1-liver_52	Sa	304	FRAGILIS j7 exp1 liver	#B58943
BARNECIELA-j7-exp1-liver_60	Sa	306	BARNECIELA j7 exp1 liver	#397FB9
Nacl-j7-exp1-liver_32	Sa	307	Nacl j7 exp1 liver	#006D2C
BARNECIELA-j14-exp1-liver_82	Sa	308	BARNECIELA j14 exp1 liver	#08519C
ATB-j3-exp1-liver_12	Sa	311	ATB j3 exp1 liver	#FB6A4A
HIRAE-j14-exp1-liver_70	Sa	312	HIRAE j14 exp1 liver	#54278F
St_SCFA-exp2-liver_pre	St	1	-	-
St_PA-exp3-liver_pre	St	2	-	-
St_BA1-exp3-liver_pre	St	3	-	-
St_AA_exp3-liver_pre	St	4	-	-
St_BA2-exp3-liver_pre	St	6	-	-
St_SCFA-exp2-liver_post	St	78	-	-
St_PA-exp3-liver_post	St	79	-	-
St_SCFA-exp3-liver_pre	St	81	-	-
St_PA-exp1-liver_pre	St	82	-	-
St_AA_exp3-liver_post	St	84	-	-
St_AA-exp1-liver_pre	St	90	-	-
St_BA2-exp3-liver_post	St	95	-	-
St_BA1-exp3-liver_post	St	97	-	-
St_BA1-exp2-liver_pre	St	99	-	-
St_BA2-exp2-liver_pre	St	101	-	-
St_SCFA-exp3-liver_post	St	197	-	-
St_SCFA-exp1-liver_pre	St	199	-	-
St_BA2-exp2-liver_post	St	222	-	-
St_BA1-exp2-liver_post	St	226	-	-
St_BA1-exp1-liver_pre	St	230	-	-
St_BA2-exp1-liver_pre	St	234	-	-
St_AA-exp1-liver_post	St	252	-	-
St_PA-exp1-liver_post	St	256	-	-
St_AA_exp2-liver_pre	St	257	-	-
St_PA-exp2-liver_pre	St	260	-	-
St_SCFA-exp1-liver_post	St	322	-	-
St_PA-exp2-liver_post	St	326	-	-
St_AA_exp2-liver_post	St	327	-	-
St_BA2-exp1-liver_post	St	329	-	-
St_BA1-exp1-liver_post	St	330	-	-

## Sheet: FileInfos
Sid	File.sf	Date.sf	Name.sf	Batch.sf	InjOrder.sf	File.pa	Date.pa	Name.pa	Batch.pa	InjOrder.pa	File.ba	Date.ba	Name.ba	Batch.ba	InjOrder.ba	File.gc	Date.gc	Name.gc	Batch.gc	InjOrder.gc
BlM-exp2-liver_pre	Bl_matrice-exp2-liver_SF_3a.d	(02/08/17 00:00:00)	Bl_matrice-exp2-liver_SF_3a	sfliver2	2	-	(NA NA)	-	-	-	-	(NA NA)	-	-	-	-	(NA NA)	-	-	-
BlM_exp3-liver_pre	-	(NA NA)	-	-	-	Bl_matrice-exp3-liver_PA_3a.d	(03/28/17 00:00:00)	Bl_matrice-exp3-liver_PA_3a	paliver3	2	Bl_matrice-exp3-liver_BA_4a.d	(01/27/17 00:00:00)	Bl_matrice-exp3-liver_BA_4a	baliver3	3	Bl_matrice-exp3-liver_GCMRM_4a.D	(02/23/17 00:00:00)	Bl_matrice-exp3-liver_4a	gcliver3	2
BlM-exp2-liver_post	Bl_matrice-exp2-liver_SF_3b.d	(02/08/17 00:00:00)	Bl_matrice-exp2-liver_SF_3b	sfliver2	76	-	(NA NA)	-	-	-	-	(NA NA)	-	-	-	-	(NA NA)	-	-	-
BlM_exp3-liver_post	-	(NA NA)	-	-	-	Bl_matrice-exp3-liver_PA_3b.d	(03/28/17 00:00:00)	Bl_matrice-exp3-liver_PA_3b	paliver3	76	Bl_matrice-exp3-liver_BA_4b.d	(01/27/17 00:00:00)	Bl_matrice-exp3-liver_BA_4b	baliver3	81	Bl_matrice-exp3-liver_GCMRM_4b.D	(02/26/17 00:00:00)	Bl_matrice-exp3-liver_4b	gcliver3	77
BlM-exp3-liver_pre	Bl_matrice-exp3-liver_SF_3a.d	(02/08/17 00:00:00)	Bl_matrice-exp3-liver_SF_3a	sfliver3	79	-	(NA NA)	-	-	-	-	(NA NA)	-	-	-	-	(NA NA)	-	-	-
Bl_matrice-exp1-liver_3a	-	(NA NA)	-	-	-	Bl_matrice-exp1-liver_PA_3a.d	(03/28/17 00:00:00)	Bl_matrice-exp1-liver_PA_3a	paliver1	79	-	(NA NA)	-	-	-	-	(NA NA)	-	-	-
Bl_matrice-exp2-liver_pre	-	(NA NA)	-	-	-	-	(NA NA)	-	-	-	Bl_matrice-exp2-liver_BA_4a.d	(01/30/17 00:00:00)	Bl_matrice-exp2-liver_BA_4a	baliver2	86	-	(NA NA)	-	-	-
BlM_exp1-liver_pre	-	(NA NA)	-	-	-	-	(NA NA)	-	-	-	Bl_matrice-exp1-liver_BA_4a.d	(02/02/17 00:00:00)	Bl_matrice-exp1-liver_BA_4a	baliver1	167	Bl_matrice-exp1-liver_GCMRM_4a.D	(03/01/17 00:00:00)	Bl_matrice-exp1-liver_4a	gcliver1	80
BlM-exp3-liver_post	Bl_matrice-exp3-liver_SF_3b.d	(02/11/17 00:00:00)	Bl_matrice-exp3-liver_SF_3b	sfliver3	153	-	(NA NA)	-	-	-	-	(NA NA)	-	-	-	-	(NA NA)	-	-	-
BlM-exp1-liver_pre	Bl_matrice-exp1-liver_SF_3a.d	(02/14/17 00:00:00)	Bl_matrice-exp1-liver_SF_3a	sfliver1	156	-	(NA NA)	-	-	-	-	(NA NA)	-	-	-	-	(NA NA)	-	-	-
Bl_matrice-exp2-liver_post	-	(NA NA)	-	-	-	-	(NA NA)	-	-	-	Bl_matrice-exp2-liver_BA_4b.d	(01/30/17 00:00:00)	Bl_matrice-exp2-liver_BA_4b	baliver2	162	-	(NA NA)	-	-	-
Bl_matrice-exp1-liver_3b	-	(NA NA)	-	-	-	Bl_matrice-exp1-liver_PA_3b.d	(03/31/17 00:00:00)	Bl_matrice-exp1-liver_PA_3b	paliver1	173	-	(NA NA)	-	-	-	-	(NA NA)	-	-	-
BlM_pre-exp2-liver	-	(NA NA)	-	-	-	-	(NA NA)	-	-	-	-	(NA NA)	-	-	-	Bl_matrice-exp2-liver_GCMRM_4aa.D	(03/07/17 00:00:00)	Bl_matrice-exp2-liver_4aa	gcliver2	175
BlM_exp2-liver_pre	-	(NA NA)	-	-	-	Bl_matrice-exp2-liver_PA_3aa.d	(04/03/17 00:00:00)	Bl_matrice-exp2-liver_PA_3aa	paliver2	176	-	(NA NA)	-	-	-	-	(NA NA)	-	-	-
BlM_exp1-liver_post	-	(NA NA)	-	-	-	-	(NA NA)	-	-	-	Bl_matrice-exp1-liver_BA_4b.d	(02/02/17 00:00:00)	Bl_matrice-exp1-liver_BA_4b	baliver1	260	Bl_matrice-exp1-liver_GCMRM_4b.D	(03/04/17 00:00:00)	Bl_matrice-exp1-liver_4b	gcliver1	172
BlM-exp1-liver_post	Bl_matrice-exp1-liver_SF_3b.d	(02/17/17 00:00:00)	Bl_matrice-exp1-liver_SF_3b	sfliver1	248	-	(NA NA)	-	-	-	-	(NA NA)	-	-	-	-	(NA NA)	-	-	-
BlM_exp2-liver_post	-	(NA NA)	-	-	-	Bl_matrice-exp2-liver_PA_4b.d	(04/06/17 00:00:00)	Bl_matrice-exp2-liver_PA_4b	paliver2	250	-	(NA NA)	-	-	-	-	(NA NA)	-	-	-
BlM_post-exp2-liver	-	(NA NA)	-	-	-	-	(NA NA)	-	-	-	-	(NA NA)	-	-	-	Bl_matrice-exp2-liver_GCMRM_4b.D	(03/10/17 00:00:00)	Bl_matrice-exp2-liver_4b	gcliver2	250
QC-exp2-liver_5a	QC_batch-exp2-liver_SF_5a.d	(02/08/17 00:00:00)	QC_batch-exp2-liver_SF_5a	sfliver2	3	-	(NA NA)	-	-	-	-	(NA NA)	-	-	-	-	(NA NA)	-	-	-
QC_exp3-liver_5a	-	(NA NA)	-	-	-	QC_batch-exp3-liver_PA_5a.d	(03/28/17 00:00:00)	QC_batch-exp3-liver_PA_5a	paliver3	3	QC_batch-exp3-liver_BA_5a.d	(01/27/17 00:00:00)	QC_batch-exp3-liver_BA_5a	baliver3	5	QC_batch-exp3-liver_GCMRM_5a.D	(02/23/17 00:00:00)	QC_batch-exp3-liver_5a	gcliver3	3
QC_exp123-liver_6a	-	(NA NA)	-	-	-	-	(NA NA)	-	-	-	QC_batch-exp123-liver_BA_6a.d	(01/27/17 00:00:00)	QC_batch-exp123-liver_BA_6a	baliver3	4	-	(NA NA)	-	-	-
QC_exp3-liver_5b	-	(NA NA)	-	-	-	QC_batch-exp3-liver_PA_5b.d	(03/28/17 00:00:00)	QC_batch-exp3-liver_PA_5b	paliver3	14	QC_batch-exp3-liver_BA_5b.d	(01/27/17 00:00:00)	QC_batch-exp3-liver_BA_5b	baliver3	16	QC_batch-exp3-liver_GCMRM_5b.D	(02/23/17 00:00:00)	QC_batch-exp3-liver_5b	gcliver3	14
QC-exp2-liver_5b	QC_batch-exp2-liver_SF_5b.d	(02/08/17 00:00:00)	QC_batch-exp2-liver_SF_5b	sfliver2	15	-	(NA NA)	-	-	-	-	(NA NA)	-	-	-	-	(NA NA)	-	-	-
QC-exp2-liver_5c	QC_batch-exp2-liver_SF_5c.d	(02/08/17 00:00:00)	QC_batch-exp2-liver_SF_5c	sfliver2	26	-	(NA NA)	-	-	-	-	(NA NA)	-	-	-	-	(NA NA)	-	-	-
QC_exp3-liver_5c	-	(NA NA)	-	-	-	QC_batch-exp3-liver_PA_5c.d	(03/28/17 00:00:00)	QC_batch-exp3-liver_PA_5c	paliver3	26	QC_batch-exp3-liver_BA_5c.d	(01/27/17 00:00:00)	QC_batch-exp3-liver_BA_5c	baliver3	28	QC_batch-exp3-liver_GCMRM_5c.D	(02/26/17 00:00:00)	QC_batch-exp3-liver_5c	gcliver3	26
QC-exp2-liver_5d	QC_batch-exp2-liver_SF_5d.d	(02/08/17 00:00:00)	QC_batch-exp2-liver_SF_5d	sfliver2	36	-	(NA NA)	-	-	-	-	(NA NA)	-	-	-	-	(NA NA)	-	-	-
QC_exp3-liver_6a	-	(NA NA)	-	-	-	-	(NA NA)	-	-	-	-	(NA NA)	-	-	-	QC_batch-exp3-liver_GCMRM_6a.D	(02/26/17 00:00:00)	QC_batch-exp3-liver_6a	gcliver3	38
QC-exp2-liver_5e	QC_batch-exp2-liver_SF_5e.d	(02/08/17 00:00:00)	QC_batch-exp2-liver_SF_5e	sfliver2	47	-	(NA NA)	-	-	-	-	(NA NA)	-	-	-	-	(NA NA)	-	-	-
QC_exp3-liver_6b	-	(NA NA)	-	-	-	-	(NA NA)	-	-	-	-	(NA NA)	-	-	-	QC_batch-exp3-liver_GCMRM_6b.D	(02/26/17 00:00:00)	QC_batch-exp3-liver_6b	gcliver3	50
QC_exp3-liver_5d	-	(NA NA)	-	-	-	QC_batch-exp3-liver_PA_5d.d	(03/28/17 00:00:00)	QC_batch-exp3-liver_PA_5d	paliver3	38	QC_batch-exp3-liver_BA_5d.d	(01/27/17 00:00:00)	QC_batch-exp3-liver_BA_5d	baliver3	40	QC_batch-exp3-liver_GCMRM_5d.D	(02/26/17 00:00:00)	QC_batch-exp3-liver_5d	gcliver3	75
QC_exp3-liver_5e	-	(NA NA)	-	-	-	QC_batch-exp3-liver_PA_5e.d	(03/28/17 00:00:00)	QC_batch-exp3-liver_PA_5e	paliver3	50	QC_batch-exp3-liver_BA_5e.d	(01/27/17 00:00:00)	QC_batch-exp3-liver_BA_5e	baliver3	52	-	(NA NA)	-	-	-
QC-exp2-liver_5f	QC_batch-exp2-liver_SF_5f.d	(02/08/17 00:00:00)	QC_batch-exp2-liver_SF_5f	sfliver2	60	-	(NA NA)	-	-	-	-	(NA NA)	-	-	-	-	(NA NA)	-	-	-
QC_exp3-liver_6c	-	(NA NA)	-	-	-	-	(NA NA)	-	-	-	-	(NA NA)	-	-	-	QC_batch-exp3-liver_GCMRM_6c.D	(02/26/17 00:00:00)	QC_batch-exp3-liver_6c	gcliver3	62
QC_exp3-liver_5f	-	(NA NA)	-	-	-	QC_batch-exp3-liver_PA_5f.d	(03/28/17 00:00:00)	QC_batch-exp3-liver_PA_5f	paliver3	62	QC_batch-exp3-liver_BA_5f.d	(01/27/17 00:00:00)	QC_batch-exp3-liver_BA_5f	baliver3	63	-	(NA NA)	-	-	-
QC-exp2-liver_5g	QC_batch-exp2-liver_SF_5g.d	(02/08/17 00:00:00)	QC_batch-exp2-liver_SF_5g	sfliver2	75	-	(NA NA)	-	-	-	-	(NA NA)	-	-	-	-	(NA NA)	-	-	-
QC_exp3-liver_5g	-	(NA NA)	-	-	-	QC_batch-exp3-liver_PA_5g.d	(03/28/17 00:00:00)	QC_batch-exp3-liver_PA_5g	paliver3	75	QC_batch-exp3-liver_BA_5g.d	(01/27/17 00:00:00)	QC_batch-exp3-liver_BA_5g	baliver3	75	-	(NA NA)	-	-	-
QC_exp123-liver_6b	-	(NA NA)	-	-	-	-	(NA NA)	-	-	-	QC_batch-exp123-liver_BA_6b.d	(01/27/17 00:00:00)	QC_batch-exp123-liver_BA_6b	baliver3	76	-	(NA NA)	-	-	-
QC_exp3-liver_6d	-	(NA NA)	-	-	-	-	(NA NA)	-	-	-	-	(NA NA)	-	-	-	QC_batch-exp3-liver_GCMRM_6d.D	(02/26/17 00:00:00)	QC_batch-exp3-liver_6d	gcliver3	76
QC_exp3-liver_5h	-	(NA NA)	-	-	-	-	(NA NA)	-	-	-	QC_batch-exp3-liver_BA_5h.d	(01/27/17 00:00:00)	QC_batch-exp3-liver_BA_5h	baliver3	79	-	(NA NA)	-	-	-
QC-exp3-liver_5a	QC_batch-exp3-liver_SF_5a.d	(02/08/17 00:00:00)	QC_batch-exp3-liver_SF_5a	sfliver3	80	-	(NA NA)	-	-	-	-	(NA NA)	-	-	-	-	(NA NA)	-	-	-
QC_exp123-liver_6bb	-	(NA NA)	-	-	-	-	(NA NA)	-	-	-	QC_batch-exp123-liver_BA_6bb.d	(01/27/17 00:00:00)	QC_batch-exp123-liver_BA_6bb	baliver3	80	-	(NA NA)	-	-	-
QC_exp123-liver_pre.baliver2	-	(NA NA)	-	-	-	-	(NA NA)	-	-	-	QC_batch-exp123-liver_BA_6a.d	(01/30/17 00:00:00)	QC_batch-exp123-liver_BA_6a	baliver2	87	-	(NA NA)	-	-	-
QC-exp3-liver_5b	QC_batch-exp3-liver_SF_5b.d	(02/08/17 00:00:00)	QC_batch-exp3-liver_SF_5b	sfliver3	91	-	(NA NA)	-	-	-	-	(NA NA)	-	-	-	-	(NA NA)	-	-	-
QC-exp3-liver_5c	QC_batch-exp3-liver_SF_5c.d	(02/08/17 00:00:00)	QC_batch-exp3-liver_SF_5c	sfliver3	103	-	(NA NA)	-	-	-	-	(NA NA)	-	-	-	-	(NA NA)	-	-	-
QC_exp1-liver_5a	-	(NA NA)	-	-	-	QC_batch-exp1-liver_PA_5a.d	(03/28/17 00:00:00)	QC_batch-exp1-liver_PA_5a	paliver1	80	QC_batch-exp1-liver_BA_5a.d	(02/02/17 00:00:00)	QC_batch-exp1-liver_BA_5a	baliver1	169	QC_batch-exp1-liver_GCMRM_5a.D	(03/01/17 00:00:00)	QC_batch-exp1-liver_5a	gcliver1	81
QC-exp3-liver_5d	QC_batch-exp3-liver_SF_5d.d	(02/08/17 00:00:00)	QC_batch-exp3-liver_SF_5d	sfliver3	115	-	(NA NA)	-	-	-	-	(NA NA)	-	-	-	-	(NA NA)	-	-	-
QC_exp1-liver_5b	-	(NA NA)	-	-	-	QC_batch-exp1-liver_PA_5b.d	(03/28/17 00:00:00)	QC_batch-exp1-liver_PA_5b	paliver1	93	QC_batch-exp1-liver_BA_5b.d	(02/02/17 00:00:00)	QC_batch-exp1-liver_BA_5b	baliver1	182	QC_batch-exp1-liver_GCMRM_5b.D	(03/01/17 00:00:00)	QC_batch-exp1-liver_5b	gcliver1	94
QC-exp3-liver_5e	QC_batch-exp3-liver_SF_5e.d	(02/08/17 00:00:00)	QC_batch-exp3-liver_SF_5e	sfliver3	127	-	(NA NA)	-	-	-	-	(NA NA)	-	-	-	-	(NA NA)	-	-	-
QC_exp1-liver_6a	-	(NA NA)	-	-	-	-	(NA NA)	-	-	-	-	(NA NA)	-	-	-	QC_batch-exp1-liver_GCMRM_6a.D	(03/01/17 00:00:00)	QC_batch-exp1-liver_6a	gcliver1	132
QC_exp1-liver_5c	-	(NA NA)	-	-	-	QC_batch-exp1-liver_PA_5c.d	(03/28/17 00:00:00)	QC_batch-exp1-liver_PA_5c	paliver1	105	QC_batch-exp1-liver_BA_5c.d	(02/02/17 00:00:00)	QC_batch-exp1-liver_BA_5c	baliver1	194	QC_batch-exp1-liver_GCMRM_5c.D	(03/01/17 00:00:00)	QC_batch-exp1-liver_5c	gcliver1	106
QC-exp3-liver_5f	QC_batch-exp3-liver_SF_5f.d	(02/08/17 00:00:00)	QC_batch-exp3-liver_SF_5f	sfliver3	139	-	(NA NA)	-	-	-	-	(NA NA)	-	-	-	-	(NA NA)	-	-	-
QC_exp1-liver_6b	-	(NA NA)	-	-	-	-	(NA NA)	-	-	-	-	(NA NA)	-	-	-	QC_batch-exp1-liver_GCMRM_6b.D	(03/01/17 00:00:00)	QC_batch-exp1-liver_6b	gcliver1	144
QC_exp2-liver_5a	-	(NA NA)	-	-	-	QC_batch-exp2-liver_PA_5a.d	(04/03/17 00:00:00)	QC_batch-exp2-liver_PA_5a	paliver2	177	QC_batch-exp2-liver_BA_5a.d	(01/30/17 00:00:00)	QC_batch-exp2-liver_BA_5a	baliver2	88	QC_batch-exp2-liver_GCMRM_5a.D	(03/07/17 00:00:00)	QC_batch-exp2-liver_5a	gcliver2	176
QC_exp1-liver_5d	-	(NA NA)	-	-	-	QC_batch-exp1-liver_PA_5d.d	(03/28/17 00:00:00)	QC_batch-exp1-liver_PA_5d	paliver1	118	QC_batch-exp1-liver_BA_5d.d	(02/02/17 00:00:00)	QC_batch-exp1-liver_BA_5d	baliver1	207	QC_batch-exp1-liver_GCMRM_5d.D	(03/01/17 00:00:00)	QC_batch-exp1-liver_5d	gcliver1	119
QC-exp3-liver_5g	QC_batch-exp3-liver_SF_5g.d	(02/11/17 00:00:00)	QC_batch-exp3-liver_SF_5g	sfliver3	152	-	(NA NA)	-	-	-	-	(NA NA)	-	-	-	-	(NA NA)	-	-	-
QC_exp1-liver_6c	-	(NA NA)	-	-	-	-	(NA NA)	-	-	-	-	(NA NA)	-	-	-	QC_batch-exp1-liver_GCMRM_6c.D	(03/04/17 00:00:00)	QC_batch-exp1-liver_6c	gcliver1	156
QC-exp1-liver_5a	QC_batch-exp1-liver_SF_5a.d	(02/14/17 00:00:00)	QC_batch-exp1-liver_SF_5a	sfliver1	157	-	(NA NA)	-	-	-	-	(NA NA)	-	-	-	-	(NA NA)	-	-	-
QC_exp2-liver_5b	-	(NA NA)	-	-	-	QC_batch-exp2-liver_PA_5b.d	(04/03/17 00:00:00)	QC_batch-exp2-liver_PA_5b	paliver2	188	QC_batch-exp2-liver_BA_5b.d	(01/30/17 00:00:00)	QC_batch-exp2-liver_BA_5b	baliver2	100	QC_batch-exp2-liver_GCMRM_5b.D	(03/07/17 00:00:00)	QC_batch-exp2-liver_5b	gcliver2	187
QC_exp123-liver_post.baliver2	-	(NA NA)	-	-	-	-	(NA NA)	-	-	-	QC_batch-exp123-liver_BA_6b.d	(01/30/17 00:00:00)	QC_batch-exp123-liver_BA_6b	baliver2	161	-	(NA NA)	-	-	-
QC_exp1-liver_5gb	-	(NA NA)	-	-	-	QC_batch-exp1-liver_PA_5gb.d	(03/31/17 00:00:00)	QC_batch-exp1-liver_PA_5gb	paliver1	164	-	(NA NA)	-	-	-	-	(NA NA)	-	-	-
QC_exp1-liver_5gc	-	(NA NA)	-	-	-	QC_batch-exp1-liver_PA_5gc.d	(03/31/17 00:00:00)	QC_batch-exp1-liver_PA_5gc	paliver1	165	-	(NA NA)	-	-	-	-	(NA NA)	-	-	-
QC_exp1-liver_5gd	-	(NA NA)	-	-	-	QC_batch-exp1-liver_PA_5gd.d	(03/31/17 00:00:00)	QC_batch-exp1-liver_PA_5gd	paliver1	166	-	(NA NA)	-	-	-	-	(NA NA)	-	-	-
QC_exp123-liver_pre.baliver1	-	(NA NA)	-	-	-	-	(NA NA)	-	-	-	QC_batch-exp123-liver_BA_6a.d	(02/02/17 00:00:00)	QC_batch-exp123-liver_BA_6a	baliver1	168	-	(NA NA)	-	-	-
QC_exp2-liver_5c	-	(NA NA)	-	-	-	QC_batch-exp2-liver_PA_5c.d	(04/03/17 00:00:00)	QC_batch-exp2-liver_PA_5c	paliver2	199	QC_batch-exp2-liver_BA_5c.d	(01/30/17 00:00:00)	QC_batch-exp2-liver_BA_5c	baliver2	111	QC_batch-exp2-liver_GCMRM_5c.D	(03/07/17 00:00:00)	QC_batch-exp2-liver_5c	gcliver2	198
QC-exp1-liver_5b	QC_batch-exp1-liver_SF_5b.d	(02/14/17 00:00:00)	QC_batch-exp1-liver_SF_5b	sfliver1	170	-	(NA NA)	-	-	-	-	(NA NA)	-	-	-	-	(NA NA)	-	-	-
QC_exp1-liver_6d	-	(NA NA)	-	-	-	-	(NA NA)	-	-	-	-	(NA NA)	-	-	-	QC_batch-exp1-liver_GCMRM_6d.D	(03/04/17 00:00:00)	QC_batch-exp1-liver_6d	gcliver1	170
QC_exp1-liver_5e	-	(NA NA)	-	-	-	QC_batch-exp1-liver_PA_5e.d	(03/28/17 00:00:00)	QC_batch-exp1-liver_PA_5e	paliver1	131	QC_batch-exp1-liver_BA_5e.d	(02/02/17 00:00:00)	QC_batch-exp1-liver_BA_5e	baliver1	220	QC_batch-exp1-liver_GCMRM_5e.D	(03/04/17 00:00:00)	QC_batch-exp1-liver_5e	gcliver1	171
QC_exp2-liver_5e	-	(NA NA)	-	-	-	QC_batch-exp2-liver_PA_5e.d	(04/03/17 00:00:00)	QC_batch-exp2-liver_PA_5e	paliver2	220	QC_batch-exp2-liver_BA_5e.d	(01/30/17 00:00:00)	QC_batch-exp2-liver_BA_5e	baliver2	131	-	(NA NA)	-	-	-
QC-exp1-liver_5c	QC_batch-exp1-liver_SF_5c.d	(02/14/17 00:00:00)	QC_batch-exp1-liver_SF_5c	sfliver1	182	-	(NA NA)	-	-	-	-	(NA NA)	-	-	-	-	(NA NA)	-	-	-
QC_exp1-liver_5f	-	(NA NA)	-	-	-	QC_batch-exp1-liver_PA_5f.d	(03/31/17 00:00:00)	QC_batch-exp1-liver_PA_5f	paliver1	143	QC_batch-exp1-liver_BA_5f.d	(02/02/17 00:00:00)	QC_batch-exp1-liver_BA_5f	baliver1	232	-	(NA NA)	-	-	-
QC_exp2-liver_5f	-	(NA NA)	-	-	-	QC_batch-exp2-liver_PA_5f.d	(04/03/17 00:00:00)	QC_batch-exp2-liver_PA_5f	paliver2	233	QC_batch-exp2-liver_BA_5f.d	(01/30/17 00:00:00)	QC_batch-exp2-liver_BA_5f	baliver2	144	-	(NA NA)	-	-	-
QC_exp2-liver_5d	-	(NA NA)	-	-	-	QC_batch-exp2-liver_PA_5d.d	(04/03/17 00:00:00)	QC_batch-exp2-liver_PA_5d	paliver2	209	QC_batch-exp2-liver_BA_5d.d	(01/30/17 00:00:00)	QC_batch-exp2-liver_BA_5d	baliver2	121	QC_batch-exp2-liver_GCMRM_5d.D	(03/10/17 00:00:00)	QC_batch-exp2-liver_5d	gcliver2	248
QC-exp1-liver_5d	QC_batch-exp1-liver_SF_5d.d	(02/14/17 00:00:00)	QC_batch-exp1-liver_SF_5d	sfliver1	195	-	(NA NA)	-	-	-	-	(NA NA)	-	-	-	-	(NA NA)	-	-	-
QC_exp1-liver_5g	-	(NA NA)	-	-	-	QC_batch-exp1-liver_PA_5g.d	(03/31/17 00:00:00)	QC_batch-exp1-liver_PA_5g	paliver1	155	QC_batch-exp1-liver_BA_5g.d	(02/02/17 00:00:00)	QC_batch-exp1-liver_BA_5g	baliver1	244	-	(NA NA)	-	-	-
QC_exp2-liver_5g	-	(NA NA)	-	-	-	QC_batch-exp2-liver_PA_5g.d	(04/06/17 00:00:00)	QC_batch-exp2-liver_PA_5g	paliver2	249	QC_batch-exp2-liver_BA_5g.d	(01/30/17 00:00:00)	QC_batch-exp2-liver_BA_5g	baliver2	160	-	(NA NA)	-	-	-
QC-exp1-liver_5e	QC_batch-exp1-liver_SF_5e.d	(02/14/17 00:00:00)	QC_batch-exp1-liver_SF_5e	sfliver1	208	-	(NA NA)	-	-	-	-	(NA NA)	-	-	-	-	(NA NA)	-	-	-
QC_exp2-liver_6a	-	(NA NA)	-	-	-	-	(NA NA)	-	-	-	-	(NA NA)	-	-	-	QC_batch-exp2-liver_GCMRM_6a.D	(03/07/17 00:00:00)	QC_batch-exp2-liver_6a	gcliver2	208
QC_exp1-liver_5h	-	(NA NA)	-	-	-	QC_batch-exp1-liver_PA_5h.d	(03/31/17 00:00:00)	QC_batch-exp1-liver_PA_5h	paliver1	172	QC_batch-exp1-liver_BA_5h.d	(02/02/17 00:00:00)	QC_batch-exp1-liver_BA_5h	baliver1	258	-	(NA NA)	-	-	-
QC_exp2-liver_6b	-	(NA NA)	-	-	-	-	(NA NA)	-	-	-	-	(NA NA)	-	-	-	QC_batch-exp2-liver_GCMRM_6b.D	(03/10/17 00:00:00)	QC_batch-exp2-liver_6b	gcliver2	219
QC-exp1-liver_5f	QC_batch-exp1-liver_SF_5f.d	(02/17/17 00:00:00)	QC_batch-exp1-liver_SF_5f	sfliver1	221	-	(NA NA)	-	-	-	-	(NA NA)	-	-	-	-	(NA NA)	-	-	-
QC_exp2-liver_6c	-	(NA NA)	-	-	-	-	(NA NA)	-	-	-	-	(NA NA)	-	-	-	QC_batch-exp2-liver_GCMRM_6c.D	(03/10/17 00:00:00)	QC_batch-exp2-liver_6c	gcliver2	232
QC-exp1-liver_5g	QC_batch-exp1-liver_SF_5ggg.d	(02/17/17 00:00:00)	QC_batch-exp1-liver_SF_5ggg	sfliver1	235	-	(NA NA)	-	-	-	-	(NA NA)	-	-	-	-	(NA NA)	-	-	-
QC-exp1-liver_5h	QC_batch-exp1-liver_SF_5h.d	(02/17/17 00:00:00)	QC_batch-exp1-liver_SF_5h	sfliver1	246	-	(NA NA)	-	-	-	-	(NA NA)	-	-	-	-	(NA NA)	-	-	-
QC-exp1-liver_4f	QC_batch-exp1-liver_SF_4f.d	(02/17/17 00:00:00)	QC_batch-exp1-liver_SF_4f	sfliver1	247	-	(NA NA)	-	-	-	-	(NA NA)	-	-	-	-	(NA NA)	-	-	-
QC_exp2-liver_6d	-	(NA NA)	-	-	-	-	(NA NA)	-	-	-	-	(NA NA)	-	-	-	QC_batch-exp2-liver_GCMRM_6d.D	(03/10/17 00:00:00)	QC_batch-exp2-liver_6d	gcliver2	249
QC_exp123-liver_post.baliver1	-	(NA NA)	-	-	-	-	(NA NA)	-	-	-	QC_batch-exp123-liver_BA_6b.d	(02/02/17 00:00:00)	QC_batch-exp123-liver_BA_6b	baliver1	259	-	(NA NA)	-	-	-
Nacl-j3-exp3-liver_3	Sa_Nacl-M3-j3-exp3-liver_SF_3.d	(02/08/17 00:00:00)	Sa_Nacl-M3-j3-exp3-liver_SF_3	sfliver3	81	Sa_Nacl-M3-j3-exp3-liver_PA_3.d	(03/28/17 00:00:00)	Sa_Nacl-M3-j3-exp3-liver_PA_3	paliver3	4	Sa_Nacl-M3-j3-exp3-liver_BA_3.d	(01/27/17 00:00:00)	Sa_Nacl-M3-j3-exp3-liver_BA_3	baliver3	6	Sa_Nacl-M3-j3-exp3-liver_GCMRM_3.D	(02/23/17 00:00:00)	Sa_Nacl-M3-j3-exp3-liver_3	gcliver3	4
FECES-j3-exp3-liver_16	Sa_FECES-M4-j3-exp3-liver_SF_16.d	(02/08/17 00:00:00)	Sa_FECES-M4-j3-exp3-liver_SF_16	sfliver3	82	Sa_FECES-M4-j3-exp3-liver_PA_16.d	(03/28/17 00:00:00)	Sa_FECES-M4-j3-exp3-liver_PA_16	paliver3	5	Sa_FECES-M4-j3-exp3-liver_BA_16.d	(01/27/17 00:00:00)	Sa_FECES-M4-j3-exp3-liver_BA_16	baliver3	7	Sa_FECES-M4-j3-exp3-liver_GCMRM_16.D	(02/23/17 00:00:00)	Sa_FECES-M4-j3-exp3-liver_16	gcliver3	5
ATB-j7-exp3-liver_33	Sa_ATB-M3-j7-exp3-liver_SF_33.d	(02/08/17 00:00:00)	Sa_ATB-M3-j7-exp3-liver_SF_33	sfliver3	83	Sa_ATB-M3-j7-exp3-liver_PA_33.d	(03/28/17 00:00:00)	Sa_ATB-M3-j7-exp3-liver_PA_33	paliver3	6	Sa_ATB-M3-j7-exp3-liver_BA_33.d	(01/27/17 00:00:00)	Sa_ATB-M3-j7-exp3-liver_BA_33	baliver3	8	Sa_ATB-M3-j7-exp3-liver_GCMRM_33.D	(02/23/17 00:00:00)	Sa_ATB-M3-j7-exp3-liver_33	gcliver3	6
AKKERMANSIA-j14-exp3-liver_63	Sa_AKKERMANSIA-M3-j14-exp3-liver_SF_63.d	(02/08/17 00:00:00)	Sa_AKKERMANSIA-M3-j14-exp3-liver_SF_63	sfliver3	84	Sa_AKKERMANSIA-M3-j14-exp3-liver_PA_63.d	(03/28/17 00:00:00)	Sa_AKKERMANSIA-M3-j14-exp3-liver_PA_63	paliver3	7	Sa_AKKERMANSIA-M3-j14-exp3-liver_BA_63.d	(01/27/17 00:00:00)	Sa_AKKERMANSIA-M3-j14-exp3-liver_BA_63	baliver3	9	Sa_AKKERMANSIA-M3-j14-exp3-liver_GCMRM_63.D	(02/23/17 00:00:00)	Sa_AKKERMANSIA-M3-j14-exp3-liver_63	gcliver3	7
Nacl-j7-exp3-liver_27	Sa_Nacl-M3-j7-exp3-liver_SF_27.d	(02/08/17 00:00:00)	Sa_Nacl-M3-j7-exp3-liver_SF_27	sfliver3	85	Sa_Nacl-M3-j7-exp3-liver_PA_27.d	(03/28/17 00:00:00)	Sa_Nacl-M3-j7-exp3-liver_PA_27	paliver3	8	Sa_Nacl-M3-j7-exp3-liver_BA_27.d	(01/27/17 00:00:00)	Sa_Nacl-M3-j7-exp3-liver_BA_27	baliver3	10	Sa_Nacl-M3-j7-exp3-liver_GCMRM_27.D	(02/23/17 00:00:00)	Sa_Nacl-M3-j7-exp3-liver_27	gcliver3	8
ATB-j3-exp3-liver_9	Sa_ATB-M3-j3-exp3-liver_SF_9.d	(02/08/17 00:00:00)	Sa_ATB-M3-j3-exp3-liver_SF_9	sfliver3	86	Sa_ATB-M3-j3-exp3-liver_PA_9.d	(03/28/17 00:00:00)	Sa_ATB-M3-j3-exp3-liver_PA_9	paliver3	9	Sa_ATB-M3-j3-exp3-liver_BA_9.d	(01/27/17 00:00:00)	Sa_ATB-M3-j3-exp3-liver_BA_9	baliver3	11	Sa_ATB-M3-j3-exp3-liver_GCMRM_9.D	(02/23/17 00:00:00)	Sa_ATB-M3-j3-exp3-liver_9	gcliver3	9
FECES-j7-exp3-liver_40	Sa_FECES-M4-j7-exp3-liver_SF_40.d	(02/08/17 00:00:00)	Sa_FECES-M4-j7-exp3-liver_SF_40	sfliver3	87	Sa_FECES-M4-j7-exp3-liver_PA_40.d	(03/28/17 00:00:00)	Sa_FECES-M4-j7-exp3-liver_PA_40	paliver3	10	Sa_FECES-M4-j7-exp3-liver_BA_40.d	(01/27/17 00:00:00)	Sa_FECES-M4-j7-exp3-liver_BA_40	baliver3	12	Sa_FECES-M4-j7-exp3-liver_GCMRM_40.D	(02/23/17 00:00:00)	Sa_FECES-M4-j7-exp3-liver_40	gcliver3	10
AKKERMANSIA-j3-exp3-liver_22	Sa_AKKERMANSIA-M4-j3-exp3-liver_SF_22.d	(02/08/17 00:00:00)	Sa_AKKERMANSIA-M4-j3-exp3-liver_SF_22	sfliver3	88	Sa_AKKERMANSIA-M4-j3-exp3-liver_PA_22.d	(03/28/17 00:00:00)	Sa_AKKERMANSIA-M4-j3-exp3-liver_PA_22	paliver3	11	Sa_AKKERMANSIA-M4-j3-exp3-liver_BA_22.d	(01/27/17 00:00:00)	Sa_AKKERMANSIA-M4-j3-exp3-liver_BA_22	baliver3	13	Sa_AKKERMANSIA-M4-j3-exp3-liver_GCMRM_22.D	(02/23/17 00:00:00)	Sa_AKKERMANSIA-M4-j3-exp3-liver_22	gcliver3	11
ATB-j14-exp3-liver_50	Sa_ATB-M2-j14-exp3-liver_SF_50.d	(02/08/17 00:00:00)	Sa_ATB-M2-j14-exp3-liver_SF_50	sfliver3	89	Sa_ATB-M2-j14-exp3-liver_PA_50.d	(03/28/17 00:00:00)	Sa_ATB-M2-j14-exp3-liver_PA_50	paliver3	12	Sa_ATB-M2-j14-exp3-liver_BA_50.d	(01/27/17 00:00:00)	Sa_ATB-M2-j14-exp3-liver_BA_50	baliver3	14	Sa_ATB-M2-j14-exp3-liver_GCMRM_50.D	(02/23/17 00:00:00)	Sa_ATB-M2-j14-exp3-liver_50	gcliver3	12
FECES-j14-exp3-liver_59	Sa_FECES-M5-j14-exp3-liver_SF_59.d	(02/08/17 00:00:00)	Sa_FECES-M5-j14-exp3-liver_SF_59	sfliver3	90	Sa_FECES-M5-j14-exp3-liver_PA_59.d	(03/28/17 00:00:00)	Sa_FECES-M5-j14-exp3-liver_PA_59	paliver3	13	Sa_FECES-M5-j14-exp3-liver_BA_59.d	(01/27/17 00:00:00)	Sa_FECES-M5-j14-exp3-liver_BA_59	baliver3	15	Sa_FECES-M5-j14-exp3-liver_GCMRM_59.D	(02/23/17 00:00:00)	Sa_FECES-M5-j14-exp3-liver_59	gcliver3	13
Nacl-j3-exp3-liver_5	Sa_Nacl-M5-j3-exp3-liver_SF_5.d	(02/08/17 00:00:00)	Sa_Nacl-M5-j3-exp3-liver_SF_5	sfliver3	92	Sa_Nacl-M5-j3-exp3-liver_PA_5.d	(03/28/17 00:00:00)	Sa_Nacl-M5-j3-exp3-liver_PA_5	paliver3	15	Sa_Nacl-M5-j3-exp3-liver_BA_5.d	(01/27/17 00:00:00)	Sa_Nacl-M5-j3-exp3-liver_BA_5	baliver3	17	Sa_Nacl-M5-j3-exp3-liver_GCMRM_5.D	(02/23/17 00:00:00)	Sa_Nacl-M5-j3-exp3-liver_5	gcliver3	15
AKKERMANSIA-j7-exp3-liver_43	Sa_AKKERMANSIA-M1-j7-exp3-liver_SF_43.d	(02/08/17 00:00:00)	Sa_AKKERMANSIA-M1-j7-exp3-liver_SF_43	sfliver3	93	Sa_AKKERMANSIA-M1-j7-exp3-liver_PA_43.d	(03/28/17 00:00:00)	Sa_AKKERMANSIA-M1-j7-exp3-liver_PA_43	paliver3	16	Sa_AKKERMANSIA-M1-j7-exp3-liver_BA_43.d	(01/27/17 00:00:00)	Sa_AKKERMANSIA-M1-j7-exp3-liver_BA_43	baliver3	18	Sa_AKKERMANSIA-M1-j7-exp3-liver_GCMRM_43.D	(02/23/17 00:00:00)	Sa_AKKERMANSIA-M1-j7-exp3-liver_43	gcliver3	16
FECES-j7-exp3-liver_37	Sa_FECES-M1-j7-exp3-liver_SF_37.d	(02/08/17 00:00:00)	Sa_FECES-M1-j7-exp3-liver_SF_37	sfliver3	94	Sa_FECES-M1-j7-exp3-liver_PA_37.d	(03/28/17 00:00:00)	Sa_FECES-M1-j7-exp3-liver_PA_37	paliver3	17	Sa_FECES-M1-j7-exp3-liver_BA_37.d	(01/27/17 00:00:00)	Sa_FECES-M1-j7-exp3-liver_BA_37	baliver3	19	Sa_FECES-M1-j7-exp3-liver_GCMRM_37.D	(02/23/17 00:00:00)	Sa_FECES-M1-j7-exp3-liver_37	gcliver3	17
ATB-j3-exp3-liver_8	Sa_ATB-M2-j3-exp3-liver_SF_8.d	(02/08/17 00:00:00)	Sa_ATB-M2-j3-exp3-liver_SF_8	sfliver3	95	Sa_ATB-M2-j3-exp3-liver_PA_8.d	(03/28/17 00:00:00)	Sa_ATB-M2-j3-exp3-liver_PA_8	paliver3	18	Sa_ATB-M2-j3-exp3-liver_BA_8.d	(01/27/17 00:00:00)	Sa_ATB-M2-j3-exp3-liver_BA_8	baliver3	20	Sa_ATB-M2-j3-exp3-liver_GCMRM_8.D	(02/23/17 00:00:00)	Sa_ATB-M2-j3-exp3-liver_8	gcliver3	18
AKKERMANSIA-j14-exp3-liver_65	Sa_AKKERMANSIA-M5-j14-exp3-liver_SF_65.d	(02/08/17 00:00:00)	Sa_AKKERMANSIA-M5-j14-exp3-liver_SF_65	sfliver3	96	Sa_AKKERMANSIA-M5-j14-exp3-liver_PA_65.d	(03/28/17 00:00:00)	Sa_AKKERMANSIA-M5-j14-exp3-liver_PA_65	paliver3	19	Sa_AKKERMANSIA-M5-j14-exp3-liver_BA_65.d	(01/27/17 00:00:00)	Sa_AKKERMANSIA-M5-j14-exp3-liver_BA_65	baliver3	21	Sa_AKKERMANSIA-M5-j14-exp3-liver_GCMRM_65.D	(02/23/17 00:00:00)	Sa_AKKERMANSIA-M5-j14-exp3-liver_65	gcliver3	19
Nacl-j7-exp3-liver_26	Sa_Nacl-M2-j7-exp3-liver_SF_26.d	(02/08/17 00:00:00)	Sa_Nacl-M2-j7-exp3-liver_SF_26	sfliver3	97	Sa_Nacl-M2-j7-exp3-liver_PA_26.d	(03/28/17 00:00:00)	Sa_Nacl-M2-j7-exp3-liver_PA_26	paliver3	20	Sa_Nacl-M2-j7-exp3-liver_BA_26.d	(01/27/17 00:00:00)	Sa_Nacl-M2-j7-exp3-liver_BA_26	baliver3	22	Sa_Nacl-M2-j7-exp3-liver_GCMRM_26.D	(02/23/17 00:00:00)	Sa_Nacl-M2-j7-exp3-liver_26	gcliver3	20
FECES-j3-exp3-liver_14	Sa_FECES-M2-j3-exp3-liver_SF_14.d	(02/08/17 00:00:00)	Sa_FECES-M2-j3-exp3-liver_SF_14	sfliver3	98	Sa_FECES-M2-j3-exp3-liver_PA_14.d	(03/28/17 00:00:00)	Sa_FECES-M2-j3-exp3-liver_PA_14	paliver3	21	Sa_FECES-M2-j3-exp3-liver_BA_14.d	(01/27/17 00:00:00)	Sa_FECES-M2-j3-exp3-liver_BA_14	baliver3	23	Sa_FECES-M2-j3-exp3-liver_GCMRM_14.D	(02/23/17 00:00:00)	Sa_FECES-M2-j3-exp3-liver_14	gcliver3	21
AKKERMANSIA-j3-exp3-liver_20	Sa_AKKERMANSIA-M2-j3-exp3-liver_SF_20.d	(02/08/17 00:00:00)	Sa_AKKERMANSIA-M2-j3-exp3-liver_SF_20	sfliver3	99	Sa_AKKERMANSIA-M2-j3-exp3-liver_PA_20.d	(03/28/17 00:00:00)	Sa_AKKERMANSIA-M2-j3-exp3-liver_PA_20	paliver3	22	Sa_AKKERMANSIA-M2-j3-exp3-liver_BA_20.d	(01/27/17 00:00:00)	Sa_AKKERMANSIA-M2-j3-exp3-liver_BA_20	baliver3	24	Sa_AKKERMANSIA-M2-j3-exp3-liver_GCMRM_20.D	(02/23/17 00:00:00)	Sa_AKKERMANSIA-M2-j3-exp3-liver_20	gcliver3	22
ATB-j7-exp3-liver_32	Sa_ATB-M2-j7-exp3-liver_SF_32.d	(02/08/17 00:00:00)	Sa_ATB-M2-j7-exp3-liver_SF_32	sfliver3	100	Sa_ATB-M2-j7-exp3-liver_PA_32.d	(03/28/17 00:00:00)	Sa_ATB-M2-j7-exp3-liver_PA_32	paliver3	23	Sa_ATB-M2-j7-exp3-liver_BA_32.d	(01/27/17 00:00:00)	Sa_ATB-M2-j7-exp3-liver_BA_32	baliver3	25	Sa_ATB-M2-j7-exp3-liver_GCMRM_32.D	(02/23/17 00:00:00)	Sa_ATB-M2-j7-exp3-liver_32	gcliver3	23
Nacl-j3-exp3-liver_4	Sa_Nacl-M4-j3-exp3-liver_SF_4.d	(02/08/17 00:00:00)	Sa_Nacl-M4-j3-exp3-liver_SF_4	sfliver3	101	Sa_Nacl-M4-j3-exp3-liver_PA_4.d	(03/28/17 00:00:00)	Sa_Nacl-M4-j3-exp3-liver_PA_4	paliver3	24	Sa_Nacl-M4-j3-exp3-liver_BA_4.d	(01/27/17 00:00:00)	Sa_Nacl-M4-j3-exp3-liver_BA_4	baliver3	26	Sa_Nacl-M4-j3-exp3-liver_GCMRM_4.D	(02/23/17 00:00:00)	Sa_Nacl-M4-j3-exp3-liver_4	gcliver3	24
AKKERMANSIA-j14-exp3-liver_61	Sa_AKKERMANSIA-M1-j14-exp3-liver_SF_61.d	(02/08/17 00:00:00)	Sa_AKKERMANSIA-M1-j14-exp3-liver_SF_61	sfliver3	102	Sa_AKKERMANSIA-M1-j14-exp3-liver_PA_61.d	(03/28/17 00:00:00)	Sa_AKKERMANSIA-M1-j14-exp3-liver_PA_61	paliver3	25	Sa_AKKERMANSIA-M1-j14-exp3-liver_BA_61.d	(01/27/17 00:00:00)	Sa_AKKERMANSIA-M1-j14-exp3-liver_BA_61	baliver3	27	Sa_AKKERMANSIA-M1-j14-exp3-liver_GCMRM_61.D	(02/23/17 00:00:00)	Sa_AKKERMANSIA-M1-j14-exp3-liver_61	gcliver3	25
ATB-j3-exp3-liver_11	Sa_ATB-M5-j3-exp3-liver_SF_11.d	(02/08/17 00:00:00)	Sa_ATB-M5-j3-exp3-liver_SF_11	sfliver3	104	Sa_ATB-M5-j3-exp3-liver_PA_11.d	(03/28/17 00:00:00)	Sa_ATB-M5-j3-exp3-liver_PA_11	paliver3	27	Sa_ATB-M5-j3-exp3-liver_BA_11.d	(01/27/17 00:00:00)	Sa_ATB-M5-j3-exp3-liver_BA_11	baliver3	29	Sa_ATB-M5-j3-exp3-liver_GCMRM_11.D	(02/26/17 00:00:00)	Sa_ATB-M5-j3-exp3-liver_11	gcliver3	27
FECES-j7-exp3-liver_41	Sa_FECES-M5-j7-exp3-liver_SF_41.d	(02/08/17 00:00:00)	Sa_FECES-M5-j7-exp3-liver_SF_41	sfliver3	105	Sa_FECES-M5-j7-exp3-liver_PA_41.d	(03/28/17 00:00:00)	Sa_FECES-M5-j7-exp3-liver_PA_41	paliver3	28	Sa_FECES-M5-j7-exp3-liver_BA_41.d	(01/27/17 00:00:00)	Sa_FECES-M5-j7-exp3-liver_BA_41	baliver3	30	Sa_FECES-M5-j7-exp3-liver_GCMRM_41.D	(02/26/17 00:00:00)	Sa_FECES-M5-j7-exp3-liver_41	gcliver3	28
AKKERMANSIA-j7-exp3-liver_46	Sa_AKKERMANSIA-M4-j7-exp3-liver_SF_46.d	(02/08/17 00:00:00)	Sa_AKKERMANSIA-M4-j7-exp3-liver_SF_46	sfliver3	106	Sa_AKKERMANSIA-M4-j7-exp3-liver_PA_46.d	(03/28/17 00:00:00)	Sa_AKKERMANSIA-M4-j7-exp3-liver_PA_46	paliver3	29	Sa_AKKERMANSIA-M4-j7-exp3-liver_BA_46.d	(01/27/17 00:00:00)	Sa_AKKERMANSIA-M4-j7-exp3-liver_BA_46	baliver3	31	Sa_AKKERMANSIA-M4-j7-exp3-liver_GCMRM_46.D	(02/26/17 00:00:00)	Sa_AKKERMANSIA-M4-j7-exp3-liver_46	gcliver3	29
ATB-j14-exp3-liver_53	Sa_ATB-M5-j14-exp3-liver_SF_53.d	(02/08/17 00:00:00)	Sa_ATB-M5-j14-exp3-liver_SF_53	sfliver3	107	Sa_ATB-M5-j14-exp3-liver_PA_53.d	(03/28/17 00:00:00)	Sa_ATB-M5-j14-exp3-liver_PA_53	paliver3	30	Sa_ATB-M5-j14-exp3-liver_BA_53.d	(01/27/17 00:00:00)	Sa_ATB-M5-j14-exp3-liver_BA_53	baliver3	32	Sa_ATB-M5-j14-exp3-liver_GCMRM_53.D	(02/26/17 00:00:00)	Sa_ATB-M5-j14-exp3-liver_53	gcliver3	30
Nacl-j7-exp3-liver_28	Sa_Nacl-M4-j7-exp3-liver_SF_28.d	(02/08/17 00:00:00)	Sa_Nacl-M4-j7-exp3-liver_SF_28	sfliver3	108	Sa_Nacl-M4-j7-exp3-liver_PA_28.d	(03/28/17 00:00:00)	Sa_Nacl-M4-j7-exp3-liver_PA_28	paliver3	31	Sa_Nacl-M4-j7-exp3-liver_BA_28.d	(01/27/17 00:00:00)	Sa_Nacl-M4-j7-exp3-liver_BA_28	baliver3	33	Sa_Nacl-M4-j7-exp3-liver_GCMRM_28.D	(02/26/17 00:00:00)	Sa_Nacl-M4-j7-exp3-liver_28	gcliver3	31
FECES-j14-exp3-liver_58	Sa_FECES-M4-j14-exp3-liver_SF_58.d	(02/08/17 00:00:00)	Sa_FECES-M4-j14-exp3-liver_SF_58	sfliver3	109	Sa_FECES-M4-j14-exp3-liver_PA_58.d	(03/28/17 00:00:00)	Sa_FECES-M4-j14-exp3-liver_PA_58	paliver3	32	Sa_FECES-M4-j14-exp3-liver_BA_58.d	(01/27/17 00:00:00)	Sa_FECES-M4-j14-exp3-liver_BA_58	baliver3	34	Sa_FECES-M4-j14-exp3-liver_GCMRM_58.D	(02/26/17 00:00:00)	Sa_FECES-M4-j14-exp3-liver_58	gcliver3	32
ATB-j7-exp3-liver_35	Sa_ATB-M5-j7-exp3-liver_SF_35.d	(02/08/17 00:00:00)	Sa_ATB-M5-j7-exp3-liver_SF_35	sfliver3	110	Sa_ATB-M5-j7-exp3-liver_PA_35.d	(03/28/17 00:00:00)	Sa_ATB-M5-j7-exp3-liver_PA_35	paliver3	33	Sa_ATB-M5-j7-exp3-liver_BA_35.d	(01/27/17 00:00:00)	Sa_ATB-M5-j7-exp3-liver_BA_35	baliver3	35	Sa_ATB-M5-j7-exp3-liver_GCMRM_35.D	(02/26/17 00:00:00)	Sa_ATB-M5-j7-exp3-liver_35	gcliver3	33
AKKERMANSIA-j3-exp3-liver_19	Sa_AKKERMANSIA-M1-j3-exp3-liver_SF_19.d	(02/08/17 00:00:00)	Sa_AKKERMANSIA-M1-j3-exp3-liver_SF_19	sfliver3	111	Sa_AKKERMANSIA-M1-j3-exp3-liver_PA_19.d	(03/28/17 00:00:00)	Sa_AKKERMANSIA-M1-j3-exp3-liver_PA_19	paliver3	34	Sa_AKKERMANSIA-M1-j3-exp3-liver_BA_19.d	(01/27/17 00:00:00)	Sa_AKKERMANSIA-M1-j3-exp3-liver_BA_19	baliver3	36	Sa_AKKERMANSIA-M1-j3-exp3-liver_GCMRM_19.D	(02/26/17 00:00:00)	Sa_AKKERMANSIA-M1-j3-exp3-liver_19	gcliver3	34
FECES-j7-exp3-liver_38	Sa_FECES-M2-j7-exp3-liver_SF_38.d	(02/08/17 00:00:00)	Sa_FECES-M2-j7-exp3-liver_SF_38	sfliver3	112	Sa_FECES-M2-j7-exp3-liver_PA_38.d	(03/28/17 00:00:00)	Sa_FECES-M2-j7-exp3-liver_PA_38	paliver3	35	Sa_FECES-M2-j7-exp3-liver_BA_38.d	(01/27/17 00:00:00)	Sa_FECES-M2-j7-exp3-liver_BA_38	baliver3	37	Sa_FECES-M2-j7-exp3-liver_GCMRM_38.D	(02/26/17 00:00:00)	Sa_FECES-M2-j7-exp3-liver_38	gcliver3	35
Nacl-j3-exp3-liver_6	Sa_Nacl-M6-j3-exp3-liver_SF_6.d	(02/08/17 00:00:00)	Sa_Nacl-M6-j3-exp3-liver_SF_6	sfliver3	113	Sa_Nacl-M6-j3-exp3-liver_PA_6.d	(03/28/17 00:00:00)	Sa_Nacl-M6-j3-exp3-liver_PA_6	paliver3	36	Sa_Nacl-M6-j3-exp3-liver_BA_6.d	(01/27/17 00:00:00)	Sa_Nacl-M6-j3-exp3-liver_BA_6	baliver3	38	Sa_Nacl-M6-j3-exp3-liver_GCMRM_6.D	(02/26/17 00:00:00)	Sa_Nacl-M6-j3-exp3-liver_6	gcliver3	36
AKKERMANSIA-j14-exp3-liver_64	Sa_AKKERMANSIA-M4-j14-exp3-liver_SF_64.d	(02/08/17 00:00:00)	Sa_AKKERMANSIA-M4-j14-exp3-liver_SF_64	sfliver3	114	Sa_AKKERMANSIA-M4-j14-exp3-liver_PA_64.d	(03/28/17 00:00:00)	Sa_AKKERMANSIA-M4-j14-exp3-liver_PA_64	paliver3	37	Sa_AKKERMANSIA-M4-j14-exp3-liver_BA_64.d	(01/27/17 00:00:00)	Sa_AKKERMANSIA-M4-j14-exp3-liver_BA_64	baliver3	39	Sa_AKKERMANSIA-M4-j14-exp3-liver_GCMRM_64.D	(02/26/17 00:00:00)	Sa_AKKERMANSIA-M4-j14-exp3-liver_64	gcliver3	37
FECES-j3-exp3-liver_17	Sa_FECES-M5-j3-exp3-liver_SF_17.d	(02/08/17 00:00:00)	Sa_FECES-M5-j3-exp3-liver_SF_17	sfliver3	116	Sa_FECES-M5-j3-exp3-liver_PA_17.d	(03/28/17 00:00:00)	Sa_FECES-M5-j3-exp3-liver_PA_17	paliver3	39	Sa_FECES-M5-j3-exp3-liver_BA_17.d	(01/27/17 00:00:00)	Sa_FECES-M5-j3-exp3-liver_BA_17	baliver3	41	Sa_FECES-M5-j3-exp3-liver_GCMRM_17.D	(02/26/17 00:00:00)	Sa_FECES-M5-j3-exp3-liver_17	gcliver3	39
ATB-j3-exp3-liver_7	Sa_ATB-M1-j3-exp3-liver_SF_7.d	(02/08/17 00:00:00)	Sa_ATB-M1-j3-exp3-liver_SF_7	sfliver3	117	Sa_ATB-M1-j3-exp3-liver_PA_7.d	(03/28/17 00:00:00)	Sa_ATB-M1-j3-exp3-liver_PA_7	paliver3	40	Sa_ATB-M1-j3-exp3-liver_BA_7.d	(01/27/17 00:00:00)	Sa_ATB-M1-j3-exp3-liver_BA_7	baliver3	42	Sa_ATB-M1-j3-exp3-liver_GCMRM_7.D	(02/26/17 00:00:00)	Sa_ATB-M1-j3-exp3-liver_7	gcliver3	40
FECES-j14-exp3-liver_60	Sa_FECES-M6-j14-exp3-liver_SF_60.d	(02/08/17 00:00:00)	Sa_FECES-M6-j14-exp3-liver_SF_60	sfliver3	118	Sa_FECES-M6-j14-exp3-liver_PA_60.d	(03/28/17 00:00:00)	Sa_FECES-M6-j14-exp3-liver_PA_60	paliver3	41	Sa_FECES-M6-j14-exp3-liver_BA_60.d	(01/27/17 00:00:00)	Sa_FECES-M6-j14-exp3-liver_BA_60	baliver3	43	Sa_FECES-M6-j14-exp3-liver_GCMRM_60.D	(02/26/17 00:00:00)	Sa_FECES-M6-j14-exp3-liver_60	gcliver3	41
AKKERMANSIA-j7-exp3-liver_44	Sa_AKKERMANSIA-M2-j7-exp3-liver_SF_44.d	(02/08/17 00:00:00)	Sa_AKKERMANSIA-M2-j7-exp3-liver_SF_44	sfliver3	119	Sa_AKKERMANSIA-M2-j7-exp3-liver_PA_44.d	(03/28/17 00:00:00)	Sa_AKKERMANSIA-M2-j7-exp3-liver_PA_44	paliver3	42	Sa_AKKERMANSIA-M2-j7-exp3-liver_BA_44.d	(01/27/17 00:00:00)	Sa_AKKERMANSIA-M2-j7-exp3-liver_BA_44	baliver3	44	Sa_AKKERMANSIA-M2-j7-exp3-liver_GCMRM_44.D	(02/26/17 00:00:00)	Sa_AKKERMANSIA-M2-j7-exp3-liver_44	gcliver3	42
Nacl-j3-exp3-liver_2	Sa_Nacl-M2-j3-exp3-liver_SF_2.d	(02/08/17 00:00:00)	Sa_Nacl-M2-j3-exp3-liver_SF_2	sfliver3	120	Sa_Nacl-M2-j3-exp3-liver_PA_2.d	(03/28/17 00:00:00)	Sa_Nacl-M2-j3-exp3-liver_PA_2	paliver3	43	Sa_Nacl-M2-j3-exp3-liver_BA_2.d	(01/27/17 00:00:00)	Sa_Nacl-M2-j3-exp3-liver_BA_2	baliver3	45	Sa_Nacl-M2-j3-exp3-liver_GCMRM_2.D	(02/26/17 00:00:00)	Sa_Nacl-M2-j3-exp3-liver_2	gcliver3	43
ATB-j14-exp3-liver_52	Sa_ATB-M4-j14-exp3-liver_SF_52.d	(02/08/17 00:00:00)	Sa_ATB-M4-j14-exp3-liver_SF_52	sfliver3	121	Sa_ATB-M4-j14-exp3-liver_PA_52.d	(03/28/17 00:00:00)	Sa_ATB-M4-j14-exp3-liver_PA_52	paliver3	44	Sa_ATB-M4-j14-exp3-liver_BA_52.d	(01/27/17 00:00:00)	Sa_ATB-M4-j14-exp3-liver_BA_52	baliver3	46	Sa_ATB-M4-j14-exp3-liver_GCMRM_52.D	(02/26/17 00:00:00)	Sa_ATB-M4-j14-exp3-liver_52	gcliver3	44
AKKERMANSIA-j3-exp3-liver_23	Sa_AKKERMANSIA-M5-j3-exp3-liver_SF_23.d	(02/08/17 00:00:00)	Sa_AKKERMANSIA-M5-j3-exp3-liver_SF_23	sfliver3	122	Sa_AKKERMANSIA-M5-j3-exp3-liver_PA_23.d	(03/28/17 00:00:00)	Sa_AKKERMANSIA-M5-j3-exp3-liver_PA_23	paliver3	45	Sa_AKKERMANSIA-M5-j3-exp3-liver_BA_23.d	(01/27/17 00:00:00)	Sa_AKKERMANSIA-M5-j3-exp3-liver_BA_23	baliver3	47	Sa_AKKERMANSIA-M5-j3-exp3-liver_GCMRM_23.D	(02/26/17 00:00:00)	Sa_AKKERMANSIA-M5-j3-exp3-liver_23	gcliver3	45
FECES-j7-exp3-liver_39	Sa_FECES-M3-j7-exp3-liver_SF_39.d	(02/08/17 00:00:00)	Sa_FECES-M3-j7-exp3-liver_SF_39	sfliver3	123	Sa_FECES-M3-j7-exp3-liver_PA_39.d	(03/28/17 00:00:00)	Sa_FECES-M3-j7-exp3-liver_PA_39	paliver3	46	Sa_FECES-M3-j7-exp3-liver_BA_39.d	(01/27/17 00:00:00)	Sa_FECES-M3-j7-exp3-liver_BA_39	baliver3	48	Sa_FECES-M3-j7-exp3-liver_GCMRM_39.D	(02/26/17 00:00:00)	Sa_FECES-M3-j7-exp3-liver_39	gcliver3	46
ATB-j7-exp3-liver_34	Sa_ATB-M4-j7-exp3-liver_SF_34.d	(02/08/17 00:00:00)	Sa_ATB-M4-j7-exp3-liver_SF_34	sfliver3	124	Sa_ATB-M4-j7-exp3-liver_PA_34.d	(03/28/17 00:00:00)	Sa_ATB-M4-j7-exp3-liver_PA_34	paliver3	47	Sa_ATB-M4-j7-exp3-liver_BA_34.d	(01/27/17 00:00:00)	Sa_ATB-M4-j7-exp3-liver_BA_34	baliver3	49	Sa_ATB-M4-j7-exp3-liver_GCMRM_34.D	(02/26/17 00:00:00)	Sa_ATB-M4-j7-exp3-liver_34	gcliver3	47
AKKERMANSIA-j14-exp3-liver_62	Sa_AKKERMANSIA-M2-j14-exp3-liver_SF_62.d	(02/08/17 00:00:00)	Sa_AKKERMANSIA-M2-j14-exp3-liver_SF_62	sfliver3	125	Sa_AKKERMANSIA-M2-j14-exp3-liver_PA_62.d	(03/28/17 00:00:00)	Sa_AKKERMANSIA-M2-j14-exp3-liver_PA_62	paliver3	48	Sa_AKKERMANSIA-M2-j14-exp3-liver_BA_62.d	(01/27/17 00:00:00)	Sa_AKKERMANSIA-M2-j14-exp3-liver_BA_62	baliver3	50	Sa_AKKERMANSIA-M2-j14-exp3-liver_GCMRM_62.D	(02/26/17 00:00:00)	Sa_AKKERMANSIA-M2-j14-exp3-liver_62	gcliver3	48
Nacl-j7-exp3-liver_25	Sa_Nacl-M1-j7-exp3-liver_SF_25.d	(02/08/17 00:00:00)	Sa_Nacl-M1-j7-exp3-liver_SF_25	sfliver3	126	Sa_Nacl-M1-j7-exp3-liver_PA_25.d	(03/28/17 00:00:00)	Sa_Nacl-M1-j7-exp3-liver_PA_25	paliver3	49	Sa_Nacl-M1-j7-exp3-liver_BA_25.d	(01/27/17 00:00:00)	Sa_Nacl-M1-j7-exp3-liver_BA_25	baliver3	51	Sa_Nacl-M1-j7-exp3-liver_GCMRM_25.D	(02/26/17 00:00:00)	Sa_Nacl-M1-j7-exp3-liver_25	gcliver3	49
FECES-j3-exp3-liver_15	Sa_FECES-M3-j3-exp3-liver_SF_15.d	(02/08/17 00:00:00)	Sa_FECES-M3-j3-exp3-liver_SF_15	sfliver3	128	Sa_FECES-M3-j3-exp3-liver_PA_15.d	(03/28/17 00:00:00)	Sa_FECES-M3-j3-exp3-liver_PA_15	paliver3	51	Sa_FECES-M3-j3-exp3-liver_BA_15.d	(01/27/17 00:00:00)	Sa_FECES-M3-j3-exp3-liver_BA_15	baliver3	53	Sa_FECES-M3-j3-exp3-liver_GCMRM_15.D	(02/26/17 00:00:00)	Sa_FECES-M3-j3-exp3-liver_15	gcliver3	51
AKKERMANSIA-j7-exp3-liver_45	Sa_AKKERMANSIA-M3-j7-exp3-liver_SF_45.d	(02/08/17 00:00:00)	Sa_AKKERMANSIA-M3-j7-exp3-liver_SF_45	sfliver3	129	Sa_AKKERMANSIA-M3-j7-exp3-liver_PA_45.d	(03/28/17 00:00:00)	Sa_AKKERMANSIA-M3-j7-exp3-liver_PA_45	paliver3	52	Sa_AKKERMANSIA-M3-j7-exp3-liver_BA_45.d	(01/27/17 00:00:00)	Sa_AKKERMANSIA-M3-j7-exp3-liver_BA_45	baliver3	54	Sa_AKKERMANSIA-M3-j7-exp3-liver_GCMRM_45.D	(02/26/17 00:00:00)	Sa_AKKERMANSIA-M3-j7-exp3-liver_45	gcliver3	52
AKKERMANSIA-j14-exp3-liver_66	Sa_AKKERMANSIA-M6-j14-exp3-liver_SF_66.d	(02/08/17 00:00:00)	Sa_AKKERMANSIA-M6-j14-exp3-liver_SF_66	sfliver3	131	Sa_AKKERMANSIA-M6-j14-exp3-liver_PA_66.d	(03/28/17 00:00:00)	Sa_AKKERMANSIA-M6-j14-exp3-liver_PA_66	paliver3	54	Sa_AKKERMANSIA-M6-j14-exp3-liver_BA_66.d	(01/27/17 00:00:00)	Sa_AKKERMANSIA-M6-j14-exp3-liver_BA_66	baliver3	55	Sa_AKKERMANSIA-M6-j14-exp3-liver_GCMRM_66.D	(02/26/17 00:00:00)	Sa_AKKERMANSIA-M6-j14-exp3-liver_66	gcliver3	54
FECES-j7-exp3-liver_42	Sa_FECES-M6-j7-exp3-liver_SF_42.d	(02/08/17 00:00:00)	Sa_FECES-M6-j7-exp3-liver_SF_42	sfliver3	132	Sa_FECES-M6-j7-exp3-liver_PA_42.d	(03/28/17 00:00:00)	Sa_FECES-M6-j7-exp3-liver_PA_42	paliver3	55	Sa_FECES-M6-j7-exp3-liver_BA_42.d	(01/27/17 00:00:00)	Sa_FECES-M6-j7-exp3-liver_BA_42	baliver3	56	Sa_FECES-M6-j7-exp3-liver_GCMRM_42.D	(02/26/17 00:00:00)	Sa_FECES-M6-j7-exp3-liver_42	gcliver3	55
ATB-j14-exp3-liver_51	Sa_ATB-M3-j14-exp3-liver_SF_51.d	(02/08/17 00:00:00)	Sa_ATB-M3-j14-exp3-liver_SF_51	sfliver3	133	Sa_ATB-M3-j14-exp3-liver_PA_51.d	(03/28/17 00:00:00)	Sa_ATB-M3-j14-exp3-liver_PA_51	paliver3	56	Sa_ATB-M3-j14-exp3-liver_BA_51.d	(01/27/17 00:00:00)	Sa_ATB-M3-j14-exp3-liver_BA_51	baliver3	57	Sa_ATB-M3-j14-exp3-liver_GCMRM_51.D	(02/26/17 00:00:00)	Sa_ATB-M3-j14-exp3-liver_51	gcliver3	56
Nacl-j7-exp3-liver_30	Sa_Nacl-M6-j7-exp3-liver_SF_30.d	(02/08/17 00:00:00)	Sa_Nacl-M6-j7-exp3-liver_SF_30	sfliver3	134	Sa_Nacl-M6-j7-exp3-liver_PA_30.d	(03/28/17 00:00:00)	Sa_Nacl-M6-j7-exp3-liver_PA_30	paliver3	57	Sa_Nacl-M6-j7-exp3-liver_BA_30.d	(01/27/17 00:00:00)	Sa_Nacl-M6-j7-exp3-liver_BA_30	baliver3	58	Sa_Nacl-M6-j7-exp3-liver_GCMRM_30.D	(02/26/17 00:00:00)	Sa_Nacl-M6-j7-exp3-liver_30	gcliver3	57
AKKERMANSIA-j3-exp3-liver_21	Sa_AKKERMANSIA-M3-j3-exp3-liver_SF_21.d	(02/08/17 00:00:00)	Sa_AKKERMANSIA-M3-j3-exp3-liver_SF_21	sfliver3	135	Sa_AKKERMANSIA-M3-j3-exp3-liver_PA_21.d	(03/28/17 00:00:00)	Sa_AKKERMANSIA-M3-j3-exp3-liver_PA_21	paliver3	58	Sa_AKKERMANSIA-M3-j3-exp3-liver_BA_21.d	(01/27/17 00:00:00)	Sa_AKKERMANSIA-M3-j3-exp3-liver_BA_21	baliver3	59	Sa_AKKERMANSIA-M3-j3-exp3-liver_GCMRM_21.D	(02/26/17 00:00:00)	Sa_AKKERMANSIA-M3-j3-exp3-liver_21	gcliver3	58
ATB-j3-exp3-liver_10	Sa_ATB-M4-j3-exp3-liver_SF_10.d	(02/08/17 00:00:00)	Sa_ATB-M4-j3-exp3-liver_SF_10	sfliver3	130	Sa_ATB-M4-j3-exp3-liver_PA_10.d	(03/28/17 00:00:00)	Sa_ATB-M4-j3-exp3-liver_PA_10	paliver3	53	Sa_ATB-M4-j3-exp3-liver_BA_10b.d	(01/27/17 00:00:00)	Sa_ATB-M4-j3-exp3-liver_BA_10b	baliver3	77	Sa_ATB-M4-j3-exp3-liver_GCMRM_10.D	(02/26/17 00:00:00)	Sa_ATB-M4-j3-exp3-liver_10	gcliver3	53
ATB-j7-exp3-liver_31	Sa_ATB-M1-j7-exp3-liver_SF_31.d	(02/08/17 00:00:00)	Sa_ATB-M1-j7-exp3-liver_SF_31	sfliver3	136	Sa_ATB-M1-j7-exp3-liver_PA_31.d	(03/28/17 00:00:00)	Sa_ATB-M1-j7-exp3-liver_PA_31	paliver3	59	Sa_ATB-M1-j7-exp3-liver_BA_31.d	(01/27/17 00:00:00)	Sa_ATB-M1-j7-exp3-liver_BA_31	baliver3	60	Sa_ATB-M1-j7-exp3-liver_GCMRM_31.D	(02/26/17 00:00:00)	Sa_ATB-M1-j7-exp3-liver_31	gcliver3	59
FECES-j14-exp3-liver_55	Sa_FECES-M1-j14-exp3-liver_SF_55.d	(02/08/17 00:00:00)	Sa_FECES-M1-j14-exp3-liver_SF_55	sfliver3	137	Sa_FECES-M1-j14-exp3-liver_PA_55.d	(03/28/17 00:00:00)	Sa_FECES-M1-j14-exp3-liver_PA_55	paliver3	60	Sa_FECES-M1-j14-exp3-liver_BA_55.d	(01/27/17 00:00:00)	Sa_FECES-M1-j14-exp3-liver_BA_55	baliver3	61	Sa_FECES-M1-j14-exp3-liver_GCMRM_55.D	(02/26/17 00:00:00)	Sa_FECES-M1-j14-exp3-liver_55	gcliver3	60
Nacl-j3-exp3-liver_1	Sa_Nacl-M1-j3-exp3-liver_SF_1.d	(02/08/17 00:00:00)	Sa_Nacl-M1-j3-exp3-liver_SF_1	sfliver3	138	Sa_Nacl-M1-j3-exp3-liver_PA_1.d	(03/28/17 00:00:00)	Sa_Nacl-M1-j3-exp3-liver_PA_1	paliver3	61	Sa_Nacl-M1-j3-exp3-liver_BA_1.d	(01/27/17 00:00:00)	Sa_Nacl-M1-j3-exp3-liver_BA_1	baliver3	62	Sa_Nacl-M1-j3-exp3-liver_GCMRM_1.D	(02/26/17 00:00:00)	Sa_Nacl-M1-j3-exp3-liver_1	gcliver3	61
ATB-j14-exp3-liver_54	Sa_ATB-M6-j14-exp3-liver_SF_54.d	(02/08/17 00:00:00)	Sa_ATB-M6-j14-exp3-liver_SF_54	sfliver3	140	Sa_ATB-M6-j14-exp3-liver_PA_54.d	(03/28/17 00:00:00)	Sa_ATB-M6-j14-exp3-liver_PA_54	paliver3	63	Sa_ATB-M6-j14-exp3-liver_BA_54.d	(01/27/17 00:00:00)	Sa_ATB-M6-j14-exp3-liver_BA_54	baliver3	64	Sa_ATB-M6-j14-exp3-liver_GCMRM_54.D	(02/26/17 00:00:00)	Sa_ATB-M6-j14-exp3-liver_54	gcliver3	63
AKKERMANSIA-j7-exp3-liver_47	Sa_AKKERMANSIA-M5-j7-exp3-liver_SF_47.d	(02/08/17 00:00:00)	Sa_AKKERMANSIA-M5-j7-exp3-liver_SF_47	sfliver3	141	Sa_AKKERMANSIA-M5-j7-exp3-liver_PA_47.d	(03/28/17 00:00:00)	Sa_AKKERMANSIA-M5-j7-exp3-liver_PA_47	paliver3	64	Sa_AKKERMANSIA-M5-j7-exp3-liver_BA_47.d	(01/27/17 00:00:00)	Sa_AKKERMANSIA-M5-j7-exp3-liver_BA_47	baliver3	65	Sa_AKKERMANSIA-M5-j7-exp3-liver_GCMRM_47.D	(02/26/17 00:00:00)	Sa_AKKERMANSIA-M5-j7-exp3-liver_47	gcliver3	64
FECES-j3-exp3-liver_13	Sa_FECES-M1-j3-exp3-liver_SF_13.d	(02/08/17 00:00:00)	Sa_FECES-M1-j3-exp3-liver_SF_13	sfliver3	142	Sa_FECES-M1-j3-exp3-liver_PA_13.d	(03/28/17 00:00:00)	Sa_FECES-M1-j3-exp3-liver_PA_13	paliver3	65	Sa_FECES-M1-j3-exp3-liver_BA_13.d	(01/27/17 00:00:00)	Sa_FECES-M1-j3-exp3-liver_BA_13	baliver3	66	Sa_FECES-M1-j3-exp3-liver_GCMRM_13.D	(02/26/17 00:00:00)	Sa_FECES-M1-j3-exp3-liver_13	gcliver3	65
ATB-j7-exp3-liver_36	Sa_ATB-M6-j7-exp3-liver_SF_36.d	(02/08/17 00:00:00)	Sa_ATB-M6-j7-exp3-liver_SF_36	sfliver3	143	Sa_ATB-M6-j7-exp3-liver_PA_36.d	(03/28/17 00:00:00)	Sa_ATB-M6-j7-exp3-liver_PA_36	paliver3	66	Sa_ATB-M6-j7-exp3-liver_BA_36.d	(01/27/17 00:00:00)	Sa_ATB-M6-j7-exp3-liver_BA_36	baliver3	67	Sa_ATB-M6-j7-exp3-liver_GCMRM_36.D	(02/26/17 00:00:00)	Sa_ATB-M6-j7-exp3-liver_36	gcliver3	66
Nacl-j7-exp3-liver_29	Sa_Nacl-M5-j7-exp3-liver_SF_29.d	(02/11/17 00:00:00)	Sa_Nacl-M5-j7-exp3-liver_SF_29	sfliver3	144	Sa_Nacl-M5-j7-exp3-liver_PA_29.d	(03/28/17 00:00:00)	Sa_Nacl-M5-j7-exp3-liver_PA_29	paliver3	67	Sa_Nacl-M5-j7-exp3-liver_BA_29.d	(01/27/17 00:00:00)	Sa_Nacl-M5-j7-exp3-liver_BA_29	baliver3	68	Sa_Nacl-M5-j7-exp3-liver_GCMRM_29.D	(02/26/17 00:00:00)	Sa_Nacl-M5-j7-exp3-liver_29	gcliver3	67
FECES-j14-exp3-liver_56	Sa_FECES-M2-j14-exp3-liver_SF_56.d	(02/11/17 00:00:00)	Sa_FECES-M2-j14-exp3-liver_SF_56	sfliver3	145	Sa_FECES-M2-j14-exp3-liver_PA_56.d	(03/28/17 00:00:00)	Sa_FECES-M2-j14-exp3-liver_PA_56	paliver3	68	Sa_FECES-M2-j14-exp3-liver_BA_56.d	(01/27/17 00:00:00)	Sa_FECES-M2-j14-exp3-liver_BA_56	baliver3	69	Sa_FECES-M2-j14-exp3-liver_GCMRM_56.D	(02/26/17 00:00:00)	Sa_FECES-M2-j14-exp3-liver_56	gcliver3	68
ATB-j3-exp3-liver_12	Sa_ATB-M6-j3-exp3-liver_SF_12.d	(02/11/17 00:00:00)	Sa_ATB-M6-j3-exp3-liver_SF_12	sfliver3	146	Sa_ATB-M6-j3-exp3-liver_PA_12.d	(03/28/17 00:00:00)	Sa_ATB-M6-j3-exp3-liver_PA_12	paliver3	69	Sa_ATB-M6-j3-exp3-liver_BA_12.d	(01/27/17 00:00:00)	Sa_ATB-M6-j3-exp3-liver_BA_12	baliver3	70	Sa_ATB-M6-j3-exp3-liver_GCMRM_12.D	(02/26/17 00:00:00)	Sa_ATB-M6-j3-exp3-liver_12	gcliver3	69
AKKERMANSIA-j3-exp3-liver_24	Sa_AKKERMANSIA-M6-j3-exp3-liver_SF_24.d	(02/11/17 00:00:00)	Sa_AKKERMANSIA-M6-j3-exp3-liver_SF_24	sfliver3	147	Sa_AKKERMANSIA-M6-j3-exp3-liver_PA_24.d	(03/28/17 00:00:00)	Sa_AKKERMANSIA-M6-j3-exp3-liver_PA_24	paliver3	70	Sa_AKKERMANSIA-M6-j3-exp3-liver_BA_24.d	(01/27/17 00:00:00)	Sa_AKKERMANSIA-M6-j3-exp3-liver_BA_24	baliver3	71	Sa_AKKERMANSIA-M6-j3-exp3-liver_GCMRM_24.D	(02/26/17 00:00:00)	Sa_AKKERMANSIA-M6-j3-exp3-liver_24	gcliver3	70
ATB-j14-exp3-liver_49	Sa_ATB-M1-j14-exp3-liver_SF_49.d	(02/11/17 00:00:00)	Sa_ATB-M1-j14-exp3-liver_SF_49	sfliver3	149	Sa_ATB-M1-j14-exp3-liver_PA_49.d	(03/28/17 00:00:00)	Sa_ATB-M1-j14-exp3-liver_PA_49	paliver3	72	Sa_ATB-M1-j14-exp3-liver_BA_49.d	(01/27/17 00:00:00)	Sa_ATB-M1-j14-exp3-liver_BA_49	baliver3	72	Sa_ATB-M1-j14-exp3-liver_GCMRM_49.D	(02/26/17 00:00:00)	Sa_ATB-M1-j14-exp3-liver_49	gcliver3	72
FECES-j3-exp3-liver_18	Sa_FECES-M6-j3-exp3-liver_SF_18.d	(02/11/17 00:00:00)	Sa_FECES-M6-j3-exp3-liver_SF_18	sfliver3	148	Sa_FECES-M6-j3-exp3-liver_PA_18.d	(03/28/17 00:00:00)	Sa_FECES-M6-j3-exp3-liver_PA_18	paliver3	71	Sa_FECES-M6-j3-exp3-liver_BA_18b.d	(01/27/17 00:00:00)	Sa_FECES-M6-j3-exp3-liver_BA_18b	baliver3	78	Sa_FECES-M6-j3-exp3-liver_GCMRM_18.D	(02/26/17 00:00:00)	Sa_FECES-M6-j3-exp3-liver_18	gcliver3	71
AKKERMANSIA-j7-exp3-liver_48	Sa_AKKERMANSIA-M6-j7-exp3-liver_SF_48.d	(02/11/17 00:00:00)	Sa_AKKERMANSIA-M6-j7-exp3-liver_SF_48	sfliver3	150	Sa_AKKERMANSIA-M6-j7-exp3-liver_PA_48.d	(03/28/17 00:00:00)	Sa_AKKERMANSIA-M6-j7-exp3-liver_PA_48	paliver3	73	Sa_AKKERMANSIA-M6-j7-exp3-liver_BA_48.d	(01/27/17 00:00:00)	Sa_AKKERMANSIA-M6-j7-exp3-liver_BA_48	baliver3	73	Sa_AKKERMANSIA-M6-j7-exp3-liver_GCMRM_48.D	(02/26/17 00:00:00)	Sa_AKKERMANSIA-M6-j7-exp3-liver_48	gcliver3	73
FECES-j14-exp3-liver_57	Sa_FECES-M3-j14-exp3-liver_SF_57.d	(02/11/17 00:00:00)	Sa_FECES-M3-j14-exp3-liver_SF_57	sfliver3	151	Sa_FECES-M3-j14-exp3-liver_PA_57.d	(03/28/17 00:00:00)	Sa_FECES-M3-j14-exp3-liver_PA_57	paliver3	74	Sa_FECES-M3-j14-exp3-liver_BA_57.d	(01/27/17 00:00:00)	Sa_FECES-M3-j14-exp3-liver_BA_57	baliver3	74	Sa_FECES-M3-j14-exp3-liver_GCMRM_57.D	(02/26/17 00:00:00)	Sa_FECES-M3-j14-exp3-liver_57	gcliver3	74
Nacl-j3-exp2-liver_2	Sa_Nacl-M2-j3-exp2-liver_SF_2.d	(02/08/17 00:00:00)	Sa_Nacl-M2-j3-exp2-liver_SF_2	sfliver2	4	Sa_Nacl-M2-j3-exp2-liver_PA_2.d	(04/03/17 00:00:00)	Sa_Nacl-M2-j3-exp2-liver_PA_2	paliver2	178	Sa_Nacl-M2-j3-exp2-liver_BA_2.d	(01/30/17 00:00:00)	Sa_Nacl-M2-j3-exp2-liver_BA_2	baliver2	89	Sa_Nacl-M2-j3-exp2-liver_GCMRM_2.D	(03/07/17 00:00:00)	Sa_Nacl-M2-j3-exp2-liver_2	gcliver2	177
MITSUAKI-j3-exp2-liver_22	Sa_MITSUAKI-M4-j3-exp2-liver_SF_22.d	(02/08/17 00:00:00)	Sa_MITSUAKI-M4-j3-exp2-liver_SF_22	sfliver2	6	Sa_MITSUAKI-M4-j3-exp2-liver_PA_22.d	(04/03/17 00:00:00)	Sa_MITSUAKI-M4-j3-exp2-liver_PA_22	paliver2	179	Sa_MITSUAKI-M4-j3-exp2-liver_BA_22.d	(01/30/17 00:00:00)	Sa_MITSUAKI-M4-j3-exp2-liver_BA_22	baliver2	91	Sa_MITSUAKI-M4-j3-exp2-liver_GCMRM_22.D	(03/07/17 00:00:00)	Sa_MITSUAKI-M4-j3-exp2-liver_22	gcliver2	179
ATB-j7-exp2-liver_34	Sa_ATB-M4-j7-exp2-liver_SF_34.d	(02/08/17 00:00:00)	Sa_ATB-M4-j7-exp2-liver_SF_34	sfliver2	7	Sa_ATB-M4-j7-exp2-liver_PA_34.d	(04/03/17 00:00:00)	Sa_ATB-M4-j7-exp2-liver_PA_34	paliver2	180	Sa_ATB-M4-j7-exp2-liver_BA_34.d	(01/30/17 00:00:00)	Sa_ATB-M4-j7-exp2-liver_BA_34	baliver2	92	Sa_ATB-M4-j7-exp2-liver_GCMRM_34.D	(03/07/17 00:00:00)	Sa_ATB-M4-j7-exp2-liver_34	gcliver2	180
MITSUAKI-j7-exp2-liver_46	Sa_MITSUAKI-M4-j7-exp2-liver_SF_46.d	(02/08/17 00:00:00)	Sa_MITSUAKI-M4-j7-exp2-liver_SF_46	sfliver2	8	Sa_MITSUAKI-M4-j7-exp2-liver_PA_46.d	(04/03/17 00:00:00)	Sa_MITSUAKI-M4-j7-exp2-liver_PA_46	paliver2	181	Sa_MITSUAKI-M4-j7-exp2-liver_BA_46.d	(01/30/17 00:00:00)	Sa_MITSUAKI-M4-j7-exp2-liver_BA_46	baliver2	93	Sa_MITSUAKI-M4-j7-exp2-liver_GCMRM_46.D	(03/07/17 00:00:00)	Sa_MITSUAKI-M4-j7-exp2-liver_46	gcliver2	181
BURKO-j3-exp2-liver_16	Sa_BURKO-M4-j3-exp2-liver_SF_16.d	(02/08/17 00:00:00)	Sa_BURKO-M4-j3-exp2-liver_SF_16	sfliver2	9	Sa_BURKO-M4-j3-exp2-liver_PA_16.d	(04/03/17 00:00:00)	Sa_BURKO-M4-j3-exp2-liver_PA_16	paliver2	182	Sa_BURKO-M4-j3-exp2-liver_BA_16.d	(01/30/17 00:00:00)	Sa_BURKO-M4-j3-exp2-liver_BA_16	baliver2	94	Sa_BURKO-M4-j3-exp2-liver_GCMRM_16.D	(03/07/17 00:00:00)	Sa_BURKO-M4-j3-exp2-liver_16	gcliver2	182
ATB-j14-exp2-liver_53	Sa_ATB-M5-j14-exp2-liver_SF_53.d	(02/08/17 00:00:00)	Sa_ATB-M5-j14-exp2-liver_SF_53	sfliver2	10	Sa_ATB-M5-j14-exp2-liver_PA_53.d	(04/03/17 00:00:00)	Sa_ATB-M5-j14-exp2-liver_PA_53	paliver2	183	Sa_ATB-M5-j14-exp2-liver_BA_53.d	(01/30/17 00:00:00)	Sa_ATB-M5-j14-exp2-liver_BA_53	baliver2	95	Sa_ATB-M5-j14-exp2-liver_GCMRM_53.D	(03/07/17 00:00:00)	Sa_ATB-M5-j14-exp2-liver_53	gcliver2	183
Nacl-j7-exp2-liver_29	Sa_Nacl-M5-j7-exp2-liver_SF_29.d	(02/08/17 00:00:00)	Sa_Nacl-M5-j7-exp2-liver_SF_29	sfliver2	11	Sa_Nacl-M5-j7-exp2-liver_PA_29.d	(04/03/17 00:00:00)	Sa_Nacl-M5-j7-exp2-liver_PA_29	paliver2	184	Sa_Nacl-M5-j7-exp2-liver_BA_29.d	(01/30/17 00:00:00)	Sa_Nacl-M5-j7-exp2-liver_BA_29	baliver2	96	Sa_Nacl-M5-j7-exp2-liver_GCMRM_29.D	(03/07/17 00:00:00)	Sa_Nacl-M5-j7-exp2-liver_29	gcliver2	184
BURKO-j14-exp2-liver_59	Sa_BURKO-M5-j14-exp2-liver_SF_59.d	(02/08/17 00:00:00)	Sa_BURKO-M5-j14-exp2-liver_SF_59	sfliver2	12	Sa_BURKO-M5-j14-exp2-liver_PA_59.d	(04/03/17 00:00:00)	Sa_BURKO-M5-j14-exp2-liver_PA_59	paliver2	185	Sa_BURKO-M5-j14-exp2-liver_BA_59.d	(01/30/17 00:00:00)	Sa_BURKO-M5-j14-exp2-liver_BA_59	baliver2	97	Sa_BURKO-M5-j14-exp2-liver_GCMRM_59.D	(03/07/17 00:00:00)	Sa_BURKO-M5-j14-exp2-liver_59	gcliver2	185
BURKO-j7-exp2-liver_40	Sa_BURKO-M4-j7-exp2-liver_SF_40.d	(02/08/17 00:00:00)	Sa_BURKO-M4-j7-exp2-liver_SF_40	sfliver2	14	Sa_BURKO-M4-j7-exp2-liver_PA_40.d	(04/03/17 00:00:00)	Sa_BURKO-M4-j7-exp2-liver_PA_40	paliver2	187	Sa_BURKO-M4-j7-exp2-liver_BA_40.d	(01/30/17 00:00:00)	Sa_BURKO-M4-j7-exp2-liver_BA_40	baliver2	99	Sa_BURKO-M4-j7-exp2-liver_GCMRM_40.D	(03/07/17 00:00:00)	Sa_BURKO-M4-j7-exp2-liver_40	gcliver2	186
HIRAE-j14-exp1-liver_67	Sa_HIRAE-M1-j14-exp1-liver_SF_67.d	(02/14/17 00:00:00)	Sa_HIRAE-M1-j14-exp1-liver_SF_67	sfliver1	158	Sa_HIRAE-M1-j14-exp1-liver_PA_67.d	(03/28/17 00:00:00)	Sa_HIRAE-M1-j14-exp1-liver_PA_67	paliver1	81	Sa_HIRAE-M1-j14-exp1-liver_BA_67.d	(02/02/17 00:00:00)	Sa_HIRAE-M1-j14-exp1-liver_BA_67	baliver1	170	Sa_HIRAE-M1-j14-exp1-liver_GCMRM_67.D	(03/01/17 00:00:00)	Sa_HIRAE-M1-j14-exp1-liver_67	gcliver1	82
BURKO-j3-exp2-liver_15	Sa_BURKO-M3-j3-exp2-liver_SF_15.d	(02/08/17 00:00:00)	Sa_BURKO-M3-j3-exp2-liver_SF_15	sfliver2	16	Sa_BURKO-M3-j3-exp2-liver_PA_15.d	(04/03/17 00:00:00)	Sa_BURKO-M3-j3-exp2-liver_PA_15	paliver2	189	Sa_BURKO-M3-j3-exp2-liver_BA_15.d	(01/30/17 00:00:00)	Sa_BURKO-M3-j3-exp2-liver_BA_15	baliver2	101	Sa_BURKO-M3-j3-exp2-liver_GCMRM_15.D	(03/07/17 00:00:00)	Sa_BURKO-M3-j3-exp2-liver_15	gcliver2	188
ATB-j7-exp1-liver_39	Sa_ATB-M3-j7-exp1-liver_SF_39.d	(02/14/17 00:00:00)	Sa_ATB-M3-j7-exp1-liver_SF_39	sfliver1	159	Sa_ATB-M3-j7-exp1-liver_PA_39.d	(03/28/17 00:00:00)	Sa_ATB-M3-j7-exp1-liver_PA_39	paliver1	82	Sa_ATB-M3-j7-exp1-liver_BA_39.d	(02/02/17 00:00:00)	Sa_ATB-M3-j7-exp1-liver_BA_39	baliver1	171	Sa_ATB-M3-j7-exp1-liver_GCMRM_39.D	(03/01/17 00:00:00)	Sa_ATB-M3-j7-exp1-liver_39	gcliver1	83
Nacl-j3-exp2-liver_5	Sa_Nacl-M5-j3-exp2-liver_SF_5.d	(02/08/17 00:00:00)	Sa_Nacl-M5-j3-exp2-liver_SF_5	sfliver2	17	Sa_Nacl-M5-j3-exp2-liver_PA_5.d	(04/03/17 00:00:00)	Sa_Nacl-M5-j3-exp2-liver_PA_5	paliver2	190	Sa_Nacl-M5-j3-exp2-liver_BA_5.d	(01/30/17 00:00:00)	Sa_Nacl-M5-j3-exp2-liver_BA_5	baliver2	102	Sa_Nacl-M5-j3-exp2-liver_GCMRM_5.D	(03/07/17 00:00:00)	Sa_Nacl-M5-j3-exp2-liver_5	gcliver2	189
HIRAE-j14-exp1-liver_71	Sa_HIRAE-M5-j14-exp1-liver_SF_71.d	(02/14/17 00:00:00)	Sa_HIRAE-M5-j14-exp1-liver_SF_71	sfliver1	160	Sa_HIRAE-M5-j14-exp1-liver_PA_71.d	(03/28/17 00:00:00)	Sa_HIRAE-M5-j14-exp1-liver_PA_71	paliver1	83	Sa_HIRAE-M5-j14-exp1-liver_BA_71.d	(02/02/17 00:00:00)	Sa_HIRAE-M5-j14-exp1-liver_BA_71	baliver1	172	Sa_HIRAE-M5-j14-exp1-liver_GCMRM_71.D	(03/01/17 00:00:00)	Sa_HIRAE-M5-j14-exp1-liver_71	gcliver1	84
ATB-j3-exp2-liver_9	Sa_ATB-M3-j3-exp2-liver_SF_9.d	(02/08/17 00:00:00)	Sa_ATB-M3-j3-exp2-liver_SF_9	sfliver2	18	Sa_ATB-M3-j3-exp2-liver_PA_9.d	(04/03/17 00:00:00)	Sa_ATB-M3-j3-exp2-liver_PA_9	paliver2	191	Sa_ATB-M3-j3-exp2-liver_BA_9.d	(01/30/17 00:00:00)	Sa_ATB-M3-j3-exp2-liver_BA_9	baliver2	103	Sa_ATB-M3-j3-exp2-liver_GCMRM_9.D	(03/07/17 00:00:00)	Sa_ATB-M3-j3-exp2-liver_9	gcliver2	190
Nacl-j7-exp1-liver_31	Sa_Nacl-M1-j7-exp1-liver_SF_31.d	(02/14/17 00:00:00)	Sa_Nacl-M1-j7-exp1-liver_SF_31	sfliver1	161	Sa_Nacl-M1-j7-exp1-liver_PA_31.d	(03/28/17 00:00:00)	Sa_Nacl-M1-j7-exp1-liver_PA_31	paliver1	84	Sa_Nacl-M1-j7-exp1-liver_BA_31.d	(02/02/17 00:00:00)	Sa_Nacl-M1-j7-exp1-liver_BA_31	baliver1	173	Sa_Nacl-M1-j7-exp1-liver_GCMRM_31.D	(03/01/17 00:00:00)	Sa_Nacl-M1-j7-exp1-liver_31	gcliver1	85
MITSUAKI-j3-exp2-liver_21	Sa_MITSUAKI-M3-j3-exp2-liver_SF_21.d	(02/08/17 00:00:00)	Sa_MITSUAKI-M3-j3-exp2-liver_SF_21	sfliver2	19	Sa_MITSUAKI-M3-j3-exp2-liver_PA_21.d	(04/03/17 00:00:00)	Sa_MITSUAKI-M3-j3-exp2-liver_PA_21	paliver2	192	Sa_MITSUAKI-M3-j3-exp2-liver_BA_21.d	(01/30/17 00:00:00)	Sa_MITSUAKI-M3-j3-exp2-liver_BA_21	baliver2	104	Sa_MITSUAKI-M3-j3-exp2-liver_GCMRM_21.D	(03/07/17 00:00:00)	Sa_MITSUAKI-M3-j3-exp2-liver_21	gcliver2	191
FRAGILIS-j7-exp1-liver_53	Sa_FRAGILIS-M5-j7-exp1-liver_SF_53.d	(02/14/17 00:00:00)	Sa_FRAGILIS-M5-j7-exp1-liver_SF_53	sfliver1	162	Sa_FRAGILIS-M5-j7-exp1-liver_PA_53.d	(03/28/17 00:00:00)	Sa_FRAGILIS-M5-j7-exp1-liver_PA_53	paliver1	85	Sa_FRAGILIS-M5-j7-exp1-liver_BA_53.d	(02/02/17 00:00:00)	Sa_FRAGILIS-M5-j7-exp1-liver_BA_53	baliver1	174	Sa_FRAGILIS-M5-j7-exp1-liver_GCMRM_53.D	(03/01/17 00:00:00)	Sa_FRAGILIS-M5-j7-exp1-liver_53	gcliver1	86
BURKO-j7-exp2-liver_39	Sa_BURKO-M3-j7-exp2-liver_SF_39.d	(02/08/17 00:00:00)	Sa_BURKO-M3-j7-exp2-liver_SF_39	sfliver2	20	Sa_BURKO-M3-j7-exp2-liver_PA_39.d	(04/03/17 00:00:00)	Sa_BURKO-M3-j7-exp2-liver_PA_39	paliver2	193	Sa_BURKO-M3-j7-exp2-liver_BA_39.d	(01/30/17 00:00:00)	Sa_BURKO-M3-j7-exp2-liver_BA_39	baliver2	105	Sa_BURKO-M3-j7-exp2-liver_GCMRM_39.D	(03/07/17 00:00:00)	Sa_BURKO-M3-j7-exp2-liver_39	gcliver2	192
BARNECIELA-j14-exp1-liver_84	Sa_BARNECIELA-M6-j14-exp1-liver_SF_84.d	(02/14/17 00:00:00)	Sa_BARNECIELA-M6-j14-exp1-liver_SF_84	sfliver1	163	Sa_BARNECIELA-M6-j14-exp1-liver_PA_84.d	(03/28/17 00:00:00)	Sa_BARNECIELA-M6-j14-exp1-liver_PA_84	paliver1	86	Sa_BARNECIELA-M6-j14-exp1-liver_BA_84.d	(02/02/17 00:00:00)	Sa_BARNECIELA-M6-j14-exp1-liver_BA_84	baliver1	175	Sa_BARNECIELA-M6-j14-exp1-liver_GCMRM_84.D	(03/01/17 00:00:00)	Sa_BARNECIELA-M6-j14-exp1-liver_84	gcliver1	87
ATB-j7-exp2-liver_33	Sa_ATB-M3-j7-exp2-liver_SF_33.d	(02/08/17 00:00:00)	Sa_ATB-M3-j7-exp2-liver_SF_33	sfliver2	21	Sa_ATB-M3-j7-exp2-liver_PA_33.d	(04/03/17 00:00:00)	Sa_ATB-M3-j7-exp2-liver_PA_33	paliver2	194	Sa_ATB-M3-j7-exp2-liver_BA_33.d	(01/30/17 00:00:00)	Sa_ATB-M3-j7-exp2-liver_BA_33	baliver2	106	Sa_ATB-M3-j7-exp2-liver_GCMRM_33.D	(03/07/17 00:00:00)	Sa_ATB-M3-j7-exp2-liver_33	gcliver2	193
ATB-j14-exp1-liver_64	Sa_ATB-M4-j14-exp1-liver_SF_64.d	(02/14/17 00:00:00)	Sa_ATB-M4-j14-exp1-liver_SF_64	sfliver1	164	Sa_ATB-M4-j14-exp1-liver_PA_64.d	(03/28/17 00:00:00)	Sa_ATB-M4-j14-exp1-liver_PA_64	paliver1	87	Sa_ATB-M4-j14-exp1-liver_BA_64.d	(02/02/17 00:00:00)	Sa_ATB-M4-j14-exp1-liver_BA_64	baliver1	176	Sa_ATB-M4-j14-exp1-liver_GCMRM_64.D	(03/01/17 00:00:00)	Sa_ATB-M4-j14-exp1-liver_64	gcliver1	88
MITSUAKI-j14-exp2-liver_64	Sa_MITSUAKI-M4-j14-exp2-liver_SF_64.d	(02/08/17 00:00:00)	Sa_MITSUAKI-M4-j14-exp2-liver_SF_64	sfliver2	22	Sa_MITSUAKI-M4-j14-exp2-liver_PA_64.d	(04/03/17 00:00:00)	Sa_MITSUAKI-M4-j14-exp2-liver_PA_64	paliver2	195	Sa_MITSUAKI-M4-j14-exp2-liver_BA_64.d	(01/30/17 00:00:00)	Sa_MITSUAKI-M4-j14-exp2-liver_BA_64	baliver2	107	Sa_MITSUAKI-M4-j14-exp2-liver_GCMRM_64.D	(03/07/17 00:00:00)	Sa_MITSUAKI-M4-j14-exp2-liver_64	gcliver2	194
FRAGILIS-j7-exp1-liver_49	Sa_FRAGILIS-M1-j7-exp1-liver_SF_49.d	(02/14/17 00:00:00)	Sa_FRAGILIS-M1-j7-exp1-liver_SF_49	sfliver1	165	Sa_FRAGILIS-M1-j7-exp1-liver_PA_49.d	(03/28/17 00:00:00)	Sa_FRAGILIS-M1-j7-exp1-liver_PA_49	paliver1	88	Sa_FRAGILIS-M1-j7-exp1-liver_BA_49.d	(02/02/17 00:00:00)	Sa_FRAGILIS-M1-j7-exp1-liver_BA_49	baliver1	177	Sa_FRAGILIS-M1-j7-exp1-liver_GCMRM_49.D	(03/01/17 00:00:00)	Sa_FRAGILIS-M1-j7-exp1-liver_49	gcliver1	89
ATB-j3-exp2-liver_10	Sa_ATB-M4-j3-exp2-liver_SF_10.d	(02/08/17 00:00:00)	Sa_ATB-M4-j3-exp2-liver_SF_10	sfliver2	5	Sa_ATB-M4-j3-exp2-liver_PA_10b.d	(04/06/17 00:00:00)	Sa_ATB-M4-j3-exp2-liver_PA_10b	paliver2	248	Sa_ATB-M4-j3-exp2-liver_BA_10.d	(01/30/17 00:00:00)	Sa_ATB-M4-j3-exp2-liver_BA_10	baliver2	90	Sa_ATB-M4-j3-exp2-liver_GCMRM_10.D	(03/07/17 00:00:00)	Sa_ATB-M4-j3-exp2-liver_10	gcliver2	178
BURKO-j14-exp2-liver_58	Sa_BURKO-M4-j14-exp2-liver_SF_58.d	(02/08/17 00:00:00)	Sa_BURKO-M4-j14-exp2-liver_SF_58	sfliver2	23	Sa_BURKO-M4-j14-exp2-liver_PA_58.d	(04/03/17 00:00:00)	Sa_BURKO-M4-j14-exp2-liver_PA_58	paliver2	196	Sa_BURKO-M4-j14-exp2-liver_BA_58.d	(01/30/17 00:00:00)	Sa_BURKO-M4-j14-exp2-liver_BA_58	baliver2	108	Sa_BURKO-M4-j14-exp2-liver_GCMRM_58.D	(03/07/17 00:00:00)	Sa_BURKO-M4-j14-exp2-liver_58	gcliver2	195
BARNECIELA-j14-exp1-liver_79	Sa_BARNECIELA-M1-j14-exp1-liver_SF_79.d	(02/14/17 00:00:00)	Sa_BARNECIELA-M1-j14-exp1-liver_SF_79	sfliver1	166	Sa_BARNECIELA-M1-j14-exp1-liver_PA_79.d	(03/28/17 00:00:00)	Sa_BARNECIELA-M1-j14-exp1-liver_PA_79	paliver1	89	Sa_BARNECIELA-M1-j14-exp1-liver_BA_79.d	(02/02/17 00:00:00)	Sa_BARNECIELA-M1-j14-exp1-liver_BA_79	baliver1	178	Sa_BARNECIELA-M1-j14-exp1-liver_GCMRM_79.D	(03/01/17 00:00:00)	Sa_BARNECIELA-M1-j14-exp1-liver_79	gcliver1	90
ATB-j14-exp2-liver_52	Sa_ATB-M4-j14-exp2-liver_SF_52.d	(02/08/17 00:00:00)	Sa_ATB-M4-j14-exp2-liver_SF_52	sfliver2	24	Sa_ATB-M4-j14-exp2-liver_PA_52.d	(04/03/17 00:00:00)	Sa_ATB-M4-j14-exp2-liver_PA_52	paliver2	197	Sa_ATB-M4-j14-exp2-liver_BA_52.d	(01/30/17 00:00:00)	Sa_ATB-M4-j14-exp2-liver_BA_52	baliver2	109	Sa_ATB-M4-j14-exp2-liver_GCMRM_52.D	(03/07/17 00:00:00)	Sa_ATB-M4-j14-exp2-liver_52	gcliver2	196
ATB-j3-exp1-liver_7	Sa_ATB-M1-j3-exp1-liver_SF_7.d	(02/14/17 00:00:00)	Sa_ATB-M1-j3-exp1-liver_SF_7	sfliver1	167	Sa_ATB-M1-j3-exp1-liver_PA_7.d	(03/28/17 00:00:00)	Sa_ATB-M1-j3-exp1-liver_PA_7	paliver1	90	Sa_ATB-M1-j3-exp1-liver_BA_7.d	(02/02/17 00:00:00)	Sa_ATB-M1-j3-exp1-liver_BA_7	baliver1	179	Sa_ATB-M1-j3-exp1-liver_GCMRM_7.D	(03/01/17 00:00:00)	Sa_ATB-M1-j3-exp1-liver_7	gcliver1	91
Nacl-j7-exp2-liver_27	Sa_Nacl-M3-j7-exp2-liver_SF_27.d	(02/08/17 00:00:00)	Sa_Nacl-M3-j7-exp2-liver_SF_27	sfliver2	25	Sa_Nacl-M3-j7-exp2-liver_PA_27.d	(04/03/17 00:00:00)	Sa_Nacl-M3-j7-exp2-liver_PA_27	paliver2	198	Sa_Nacl-M3-j7-exp2-liver_BA_27.d	(01/30/17 00:00:00)	Sa_Nacl-M3-j7-exp2-liver_BA_27	baliver2	110	Sa_Nacl-M3-j7-exp2-liver_GCMRM_27.D	(03/07/17 00:00:00)	Sa_Nacl-M3-j7-exp2-liver_27	gcliver2	197
ATB-j3-exp1-liver_11	Sa_ATB-M5-j3-exp1-liver_SF_11.d	(02/14/17 00:00:00)	Sa_ATB-M5-j3-exp1-liver_SF_11	sfliver1	168	Sa_ATB-M5-j3-exp1-liver_PA_11.d	(03/28/17 00:00:00)	Sa_ATB-M5-j3-exp1-liver_PA_11	paliver1	91	Sa_ATB-M5-j3-exp1-liver_BA_11.d	(02/02/17 00:00:00)	Sa_ATB-M5-j3-exp1-liver_BA_11	baliver1	180	Sa_ATB-M5-j3-exp1-liver_GCMRM_11.D	(03/01/17 00:00:00)	Sa_ATB-M5-j3-exp1-liver_11	gcliver1	92
ATB-j7-exp1-liver_41	Sa_ATB-M5-j7-exp1-liver_SF_41.d	(02/14/17 00:00:00)	Sa_ATB-M5-j7-exp1-liver_SF_41	sfliver1	169	Sa_ATB-M5-j7-exp1-liver_PA_41.d	(03/28/17 00:00:00)	Sa_ATB-M5-j7-exp1-liver_PA_41	paliver1	92	Sa_ATB-M5-j7-exp1-liver_BA_41.d	(02/02/17 00:00:00)	Sa_ATB-M5-j7-exp1-liver_BA_41	baliver1	181	Sa_ATB-M5-j7-exp1-liver_GCMRM_41.D	(03/01/17 00:00:00)	Sa_ATB-M5-j7-exp1-liver_41	gcliver1	93
ATB-j3-exp2-liver_8	Sa_ATB-M2-j3-exp2-liver_SF_8.d	(02/08/17 00:00:00)	Sa_ATB-M2-j3-exp2-liver_SF_8	sfliver2	27	Sa_ATB-M2-j3-exp2-liver_PA_8.d	(04/03/17 00:00:00)	Sa_ATB-M2-j3-exp2-liver_PA_8	paliver2	200	Sa_ATB-M2-j3-exp2-liver_BA_8.d	(01/30/17 00:00:00)	Sa_ATB-M2-j3-exp2-liver_BA_8	baliver2	112	Sa_ATB-M2-j3-exp2-liver_GCMRM_8.D	(03/07/17 00:00:00)	Sa_ATB-M2-j3-exp2-liver_8	gcliver2	199
BURKO-j14-exp2-liver_57	Sa_BURKO-M3-j14-exp2-liver_SF_57.d	(02/08/17 00:00:00)	Sa_BURKO-M3-j14-exp2-liver_SF_57	sfliver2	28	Sa_BURKO-M3-j14-exp2-liver_PA_57.d	(04/03/17 00:00:00)	Sa_BURKO-M3-j14-exp2-liver_PA_57	paliver2	201	Sa_BURKO-M3-j14-exp2-liver_BA_57.d	(01/30/17 00:00:00)	Sa_BURKO-M3-j14-exp2-liver_BA_57	baliver2	113	Sa_BURKO-M3-j14-exp2-liver_GCMRM_57.D	(03/07/17 00:00:00)	Sa_BURKO-M3-j14-exp2-liver_57	gcliver2	200
BARNECIELA-j3-exp1-liver_25	Sa_BARNECIELA-M1-j3-exp1-liver_SF_25.d	(02/14/17 00:00:00)	Sa_BARNECIELA-M1-j3-exp1-liver_SF_25	sfliver1	171	Sa_BARNECIELA-M1-j3-exp1-liver_PA_25.d	(03/28/17 00:00:00)	Sa_BARNECIELA-M1-j3-exp1-liver_PA_25	paliver1	94	Sa_BARNECIELA-M1-j3-exp1-liver_BA_25.d	(02/02/17 00:00:00)	Sa_BARNECIELA-M1-j3-exp1-liver_BA_25	baliver1	183	Sa_BARNECIELA-M1-j3-exp1-liver_GCMRM_25.D	(03/01/17 00:00:00)	Sa_BARNECIELA-M1-j3-exp1-liver_25	gcliver1	95
MITSUAKI-j14-exp2-liver_65	Sa_MITSUAKI-M5-j14-exp2-liver_SF_65.d	(02/08/17 00:00:00)	Sa_MITSUAKI-M5-j14-exp2-liver_SF_65	sfliver2	13	Sa_MITSUAKI-M5-j14-exp2-liver_PA_65.d	(04/03/17 00:00:00)	Sa_MITSUAKI-M5-j14-exp2-liver_PA_65	paliver2	186	Sa_MITSUAKI-M5-j14-exp2-liver_BA_65.d	(01/30/17 00:00:00)	Sa_MITSUAKI-M5-j14-exp2-liver_BA_65	baliver2	98	Sa_MITSUAKI-M5-j14-exp2-liver_GCMRM_65b.D	(03/10/17 00:00:00)	Sa_MITSUAKI-M5-j14-exp2-liver_65b	gcliver2	247
Nacl-j3-exp2-liver_3	Sa_Nacl-M3-j3-exp2-liver_SF_3.d	(02/08/17 00:00:00)	Sa_Nacl-M3-j3-exp2-liver_SF_3	sfliver2	29	Sa_Nacl-M3-j3-exp2-liver_PA_3.d	(04/03/17 00:00:00)	Sa_Nacl-M3-j3-exp2-liver_PA_3	paliver2	202	Sa_Nacl-M3-j3-exp2-liver_BA_3.d	(01/30/17 00:00:00)	Sa_Nacl-M3-j3-exp2-liver_BA_3	baliver2	114	Sa_Nacl-M3-j3-exp2-liver_GCMRM_3.D	(03/07/17 00:00:00)	Sa_Nacl-M3-j3-exp2-liver_3	gcliver2	201
HIRAE-j3-exp1-liver_17	Sa_HIRAE-M5-j3-exp1-liver_SF_17.d	(02/14/17 00:00:00)	Sa_HIRAE-M5-j3-exp1-liver_SF_17	sfliver1	172	Sa_HIRAE-M5-j3-exp1-liver_PA_17.d	(03/28/17 00:00:00)	Sa_HIRAE-M5-j3-exp1-liver_PA_17	paliver1	95	Sa_HIRAE-M5-j3-exp1-liver_BA_17.d	(02/02/17 00:00:00)	Sa_HIRAE-M5-j3-exp1-liver_BA_17	baliver1	184	Sa_HIRAE-M5-j3-exp1-liver_GCMRM_17.D	(03/01/17 00:00:00)	Sa_HIRAE-M5-j3-exp1-liver_17	gcliver1	96
MITSUAKI-j3-exp2-liver_24	Sa_MITSUAKI-M6-j3-exp2-liver_SF_24.d	(02/08/17 00:00:00)	Sa_MITSUAKI-M6-j3-exp2-liver_SF_24	sfliver2	30	Sa_MITSUAKI-M6-j3-exp2-liver_PA_24.d	(04/03/17 00:00:00)	Sa_MITSUAKI-M6-j3-exp2-liver_PA_24	paliver2	203	Sa_MITSUAKI-M6-j3-exp2-liver_BA_24.d	(01/30/17 00:00:00)	Sa_MITSUAKI-M6-j3-exp2-liver_BA_24	baliver2	115	Sa_MITSUAKI-M6-j3-exp2-liver_GCMRM_24.D	(03/07/17 00:00:00)	Sa_MITSUAKI-M6-j3-exp2-liver_24	gcliver2	202
ATB-j14-exp1-liver_62	Sa_ATB-M2-j14-exp1-liver_SF_62.d	(02/14/17 00:00:00)	Sa_ATB-M2-j14-exp1-liver_SF_62	sfliver1	173	Sa_ATB-M2-j14-exp1-liver_PA_62.d	(03/28/17 00:00:00)	Sa_ATB-M2-j14-exp1-liver_PA_62	paliver1	96	Sa_ATB-M2-j14-exp1-liver_BA_62.d	(02/02/17 00:00:00)	Sa_ATB-M2-j14-exp1-liver_BA_62	baliver1	185	Sa_ATB-M2-j14-exp1-liver_GCMRM_62.D	(03/01/17 00:00:00)	Sa_ATB-M2-j14-exp1-liver_62	gcliver1	97
ATB-j3-exp2-liver_12	Sa_ATB-M6-j3-exp2-liver_SF_12.d	(02/08/17 00:00:00)	Sa_ATB-M6-j3-exp2-liver_SF_12	sfliver2	31	Sa_ATB-M6-j3-exp2-liver_PA_12.d	(04/03/17 00:00:00)	Sa_ATB-M6-j3-exp2-liver_PA_12	paliver2	204	Sa_ATB-M6-j3-exp2-liver_BA_12.d	(01/30/17 00:00:00)	Sa_ATB-M6-j3-exp2-liver_BA_12	baliver2	116	Sa_ATB-M6-j3-exp2-liver_GCMRM_12.D	(03/07/17 00:00:00)	Sa_ATB-M6-j3-exp2-liver_12	gcliver2	203
BARNECIELA-j7-exp1-liver_57	Sa_BARNECIELA-M3-j7-exp1-liver_SF_57.d	(02/14/17 00:00:00)	Sa_BARNECIELA-M3-j7-exp1-liver_SF_57	sfliver1	174	Sa_BARNECIELA-M3-j7-exp1-liver_PA_57.d	(03/28/17 00:00:00)	Sa_BARNECIELA-M3-j7-exp1-liver_PA_57	paliver1	97	Sa_BARNECIELA-M3-j7-exp1-liver_BA_57.d	(02/02/17 00:00:00)	Sa_BARNECIELA-M3-j7-exp1-liver_BA_57	baliver1	186	Sa_BARNECIELA-M3-j7-exp1-liver_GCMRM_57.D	(03/01/17 00:00:00)	Sa_BARNECIELA-M3-j7-exp1-liver_57	gcliver1	98
BURKO-j3-exp2-liver_18	Sa_BURKO-M6-j3-exp2-liver_SF_18.d	(02/08/17 00:00:00)	Sa_BURKO-M6-j3-exp2-liver_SF_18	sfliver2	32	Sa_BURKO-M6-j3-exp2-liver_PA_18.d	(04/03/17 00:00:00)	Sa_BURKO-M6-j3-exp2-liver_PA_18	paliver2	205	Sa_BURKO-M6-j3-exp2-liver_BA_18.d	(01/30/17 00:00:00)	Sa_BURKO-M6-j3-exp2-liver_BA_18	baliver2	117	Sa_BURKO-M6-j3-exp2-liver_GCMRM_18.D	(03/07/17 00:00:00)	Sa_BURKO-M6-j3-exp2-liver_18	gcliver2	204
HIRAE-j7-exp1-liver_45	Sa_HIRAE-M3-j7-exp1-liver_SF_45.d	(02/14/17 00:00:00)	Sa_HIRAE-M3-j7-exp1-liver_SF_45	sfliver1	175	Sa_HIRAE-M3-j7-exp1-liver_PA_45.d	(03/28/17 00:00:00)	Sa_HIRAE-M3-j7-exp1-liver_PA_45	paliver1	98	Sa_HIRAE-M3-j7-exp1-liver_BA_45.d	(02/02/17 00:00:00)	Sa_HIRAE-M3-j7-exp1-liver_BA_45	baliver1	187	Sa_HIRAE-M3-j7-exp1-liver_GCMRM_45.D	(03/01/17 00:00:00)	Sa_HIRAE-M3-j7-exp1-liver_45	gcliver1	99
MITSUAKI-j7-exp2-liver_45	Sa_MITSUAKI-M3-j7-exp2-liver_SF_45.d	(02/08/17 00:00:00)	Sa_MITSUAKI-M3-j7-exp2-liver_SF_45	sfliver2	33	Sa_MITSUAKI-M3-j7-exp2-liver_PA_45.d	(04/03/17 00:00:00)	Sa_MITSUAKI-M3-j7-exp2-liver_PA_45	paliver2	206	Sa_MITSUAKI-M3-j7-exp2-liver_BA_45.d	(01/30/17 00:00:00)	Sa_MITSUAKI-M3-j7-exp2-liver_BA_45	baliver2	118	Sa_MITSUAKI-M3-j7-exp2-liver_GCMRM_45.D	(03/07/17 00:00:00)	Sa_MITSUAKI-M3-j7-exp2-liver_45	gcliver2	205
FRAGILIS-j14-exp1-liver_75	Sa_FRAGILIS-M3-j14-exp1-liver_SF_75.d	(02/14/17 00:00:00)	Sa_FRAGILIS-M3-j14-exp1-liver_SF_75	sfliver1	176	Sa_FRAGILIS-M3-j14-exp1-liver_PA_75.d	(03/28/17 00:00:00)	Sa_FRAGILIS-M3-j14-exp1-liver_PA_75	paliver1	99	Sa_FRAGILIS-M3-j14-exp1-liver_BA_75.d	(02/02/17 00:00:00)	Sa_FRAGILIS-M3-j14-exp1-liver_BA_75	baliver1	188	Sa_FRAGILIS-M3-j14-exp1-liver_GCMRM_75.D	(03/01/17 00:00:00)	Sa_FRAGILIS-M3-j14-exp1-liver_75	gcliver1	100
Nacl-j7-exp2-liver_28	Sa_Nacl-M4-j7-exp2-liver_SF_28.d	(02/08/17 00:00:00)	Sa_Nacl-M4-j7-exp2-liver_SF_28	sfliver2	34	Sa_Nacl-M4-j7-exp2-liver_PA_28.d	(04/03/17 00:00:00)	Sa_Nacl-M4-j7-exp2-liver_PA_28	paliver2	207	Sa_Nacl-M4-j7-exp2-liver_BA_28.d	(01/30/17 00:00:00)	Sa_Nacl-M4-j7-exp2-liver_BA_28	baliver2	119	Sa_Nacl-M4-j7-exp2-liver_GCMRM_28.D	(03/07/17 00:00:00)	Sa_Nacl-M4-j7-exp2-liver_28	gcliver2	206
Nacl-j7-exp1-liver_35	Sa_Nacl-M5-j7-exp1-liver_SF_35.d	(02/14/17 00:00:00)	Sa_Nacl-M5-j7-exp1-liver_SF_35	sfliver1	177	Sa_Nacl-M5-j7-exp1-liver_PA_35.d	(03/28/17 00:00:00)	Sa_Nacl-M5-j7-exp1-liver_PA_35	paliver1	100	Sa_Nacl-M5-j7-exp1-liver_BA_35.d	(02/02/17 00:00:00)	Sa_Nacl-M5-j7-exp1-liver_BA_35	baliver1	189	Sa_Nacl-M5-j7-exp1-liver_GCMRM_35.D	(03/01/17 00:00:00)	Sa_Nacl-M5-j7-exp1-liver_35	gcliver1	101
MITSUAKI-j7-exp2-liver_47	Sa_MITSUAKI-M5-j7-exp2-liver_SF_47.d	(02/08/17 00:00:00)	Sa_MITSUAKI-M5-j7-exp2-liver_SF_47	sfliver2	35	Sa_MITSUAKI-M5-j7-exp2-liver_PA_47.d	(04/03/17 00:00:00)	Sa_MITSUAKI-M5-j7-exp2-liver_PA_47	paliver2	208	Sa_MITSUAKI-M5-j7-exp2-liver_BA_47.d	(01/30/17 00:00:00)	Sa_MITSUAKI-M5-j7-exp2-liver_BA_47	baliver2	120	Sa_MITSUAKI-M5-j7-exp2-liver_GCMRM_47.D	(03/07/17 00:00:00)	Sa_MITSUAKI-M5-j7-exp2-liver_47	gcliver2	207
HIRAE-j7-exp1-liver_47	Sa_HIRAE-M5-j7-exp1-liver_SF_47.d	(02/14/17 00:00:00)	Sa_HIRAE-M5-j7-exp1-liver_SF_47	sfliver1	178	Sa_HIRAE-M5-j7-exp1-liver_PA_47.d	(03/28/17 00:00:00)	Sa_HIRAE-M5-j7-exp1-liver_PA_47	paliver1	101	Sa_HIRAE-M5-j7-exp1-liver_BA_47.d	(02/02/17 00:00:00)	Sa_HIRAE-M5-j7-exp1-liver_BA_47	baliver1	190	Sa_HIRAE-M5-j7-exp1-liver_GCMRM_47.D	(03/01/17 00:00:00)	Sa_HIRAE-M5-j7-exp1-liver_47	gcliver1	102
FRAGILIS-j3-exp1-liver_21	Sa_FRAGILIS-M3-j3-exp1-liver_SF_21.d	(02/14/17 00:00:00)	Sa_FRAGILIS-M3-j3-exp1-liver_SF_21	sfliver1	179	Sa_FRAGILIS-M3-j3-exp1-liver_PA_21.d	(03/28/17 00:00:00)	Sa_FRAGILIS-M3-j3-exp1-liver_PA_21	paliver1	102	Sa_FRAGILIS-M3-j3-exp1-liver_BA_21.d	(02/02/17 00:00:00)	Sa_FRAGILIS-M3-j3-exp1-liver_BA_21	baliver1	191	Sa_FRAGILIS-M3-j3-exp1-liver_GCMRM_21.D	(03/01/17 00:00:00)	Sa_FRAGILIS-M3-j3-exp1-liver_21	gcliver1	103
MITSUAKI-j14-exp2-liver_63	Sa_MITSUAKI-M3-j14-exp2-liver_SF_63.d	(02/08/17 00:00:00)	Sa_MITSUAKI-M3-j14-exp2-liver_SF_63	sfliver2	37	Sa_MITSUAKI-M3-j14-exp2-liver_PA_63.d	(04/03/17 00:00:00)	Sa_MITSUAKI-M3-j14-exp2-liver_PA_63	paliver2	210	Sa_MITSUAKI-M3-j14-exp2-liver_BA_63.d	(01/30/17 00:00:00)	Sa_MITSUAKI-M3-j14-exp2-liver_BA_63	baliver2	122	Sa_MITSUAKI-M3-j14-exp2-liver_GCMRM_63.D	(03/10/17 00:00:00)	Sa_MITSUAKI-M3-j14-exp2-liver_63	gcliver2	209
Nacl-j3-exp1-liver_1	Sa_Nacl-M1-j3-exp1-liver_SF_1.d	(02/14/17 00:00:00)	Sa_Nacl-M1-j3-exp1-liver_SF_1	sfliver1	180	Sa_Nacl-M1-j3-exp1-liver_PA_1.d	(03/28/17 00:00:00)	Sa_Nacl-M1-j3-exp1-liver_PA_1	paliver1	103	Sa_Nacl-M1-j3-exp1-liver_BA_1.d	(02/02/17 00:00:00)	Sa_Nacl-M1-j3-exp1-liver_BA_1	baliver1	192	Sa_Nacl-M1-j3-exp1-liver_GCMRM_1.D	(03/01/17 00:00:00)	Sa_Nacl-M1-j3-exp1-liver_1	gcliver1	104
ATB-j7-exp2-liver_32	Sa_ATB-M2-j7-exp2-liver_SF_32.d	(02/08/17 00:00:00)	Sa_ATB-M2-j7-exp2-liver_SF_32	sfliver2	38	Sa_ATB-M2-j7-exp2-liver_PA_32.d	(04/03/17 00:00:00)	Sa_ATB-M2-j7-exp2-liver_PA_32	paliver2	211	Sa_ATB-M2-j7-exp2-liver_BA_32.d	(01/30/17 00:00:00)	Sa_ATB-M2-j7-exp2-liver_BA_32	baliver2	123	Sa_ATB-M2-j7-exp2-liver_GCMRM_32.D	(03/10/17 00:00:00)	Sa_ATB-M2-j7-exp2-liver_32	gcliver2	210
HIRAE-j3-exp1-liver_15	Sa_HIRAE-M3-j3-exp1-liver_SF_15.d	(02/14/17 00:00:00)	Sa_HIRAE-M3-j3-exp1-liver_SF_15	sfliver1	181	Sa_HIRAE-M3-j3-exp1-liver_PA_15.d	(03/28/17 00:00:00)	Sa_HIRAE-M3-j3-exp1-liver_PA_15	paliver1	104	Sa_HIRAE-M3-j3-exp1-liver_BA_15.d	(02/02/17 00:00:00)	Sa_HIRAE-M3-j3-exp1-liver_BA_15	baliver1	193	Sa_HIRAE-M3-j3-exp1-liver_GCMRM_15.D	(03/01/17 00:00:00)	Sa_HIRAE-M3-j3-exp1-liver_15	gcliver1	105
BURKO-j7-exp2-liver_38	Sa_BURKO-M2-j7-exp2-liver_SF_38.d	(02/08/17 00:00:00)	Sa_BURKO-M2-j7-exp2-liver_SF_38	sfliver2	39	Sa_BURKO-M2-j7-exp2-liver_PA_38.d	(04/03/17 00:00:00)	Sa_BURKO-M2-j7-exp2-liver_PA_38	paliver2	212	Sa_BURKO-M2-j7-exp2-liver_BA_38.d	(01/30/17 00:00:00)	Sa_BURKO-M2-j7-exp2-liver_BA_38	baliver2	124	Sa_BURKO-M2-j7-exp2-liver_GCMRM_38.D	(03/10/17 00:00:00)	Sa_BURKO-M2-j7-exp2-liver_38	gcliver2	211
Nacl-j7-exp2-liver_26	Sa_Nacl-M2-j7-exp2-liver_SF_26.d	(02/08/17 00:00:00)	Sa_Nacl-M2-j7-exp2-liver_SF_26	sfliver2	40	Sa_Nacl-M2-j7-exp2-liver_PA_26.d	(04/03/17 00:00:00)	Sa_Nacl-M2-j7-exp2-liver_PA_26	paliver2	213	Sa_Nacl-M2-j7-exp2-liver_BA_26.d	(01/30/17 00:00:00)	Sa_Nacl-M2-j7-exp2-liver_BA_26	baliver2	125	Sa_Nacl-M2-j7-exp2-liver_GCMRM_26.D	(03/10/17 00:00:00)	Sa_Nacl-M2-j7-exp2-liver_26	gcliver2	212
FRAGILIS-j14-exp1-liver_76	Sa_FRAGILIS-M4-j14-exp1-liver_SF_76.d	(02/14/17 00:00:00)	Sa_FRAGILIS-M4-j14-exp1-liver_SF_76	sfliver1	183	Sa_FRAGILIS-M4-j14-exp1-liver_PA_76.d	(03/28/17 00:00:00)	Sa_FRAGILIS-M4-j14-exp1-liver_PA_76	paliver1	106	Sa_FRAGILIS-M4-j14-exp1-liver_BA_76.d	(02/02/17 00:00:00)	Sa_FRAGILIS-M4-j14-exp1-liver_BA_76	baliver1	195	Sa_FRAGILIS-M4-j14-exp1-liver_GCMRM_76.D	(03/01/17 00:00:00)	Sa_FRAGILIS-M4-j14-exp1-liver_76	gcliver1	107
ATB-j7-exp2-liver_35	Sa_ATB-M5-j7-exp2-liver_SF_35.d	(02/08/17 00:00:00)	Sa_ATB-M5-j7-exp2-liver_SF_35	sfliver2	41	Sa_ATB-M5-j7-exp2-liver_PA_35.d	(04/03/17 00:00:00)	Sa_ATB-M5-j7-exp2-liver_PA_35	paliver2	214	Sa_ATB-M5-j7-exp2-liver_BA_35.d	(01/30/17 00:00:00)	Sa_ATB-M5-j7-exp2-liver_BA_35	baliver2	126	Sa_ATB-M5-j7-exp2-liver_GCMRM_35.D	(03/10/17 00:00:00)	Sa_ATB-M5-j7-exp2-liver_35	gcliver2	213
FRAGILIS-j7-exp1-liver_54	Sa_FRAGILIS-M6-j7-exp1-liver_SF_54.d	(02/14/17 00:00:00)	Sa_FRAGILIS-M6-j7-exp1-liver_SF_54	sfliver1	184	Sa_FRAGILIS-M6-j7-exp1-liver_PA_54.d	(03/28/17 00:00:00)	Sa_FRAGILIS-M6-j7-exp1-liver_PA_54	paliver1	107	Sa_FRAGILIS-M6-j7-exp1-liver_BA_54.d	(02/02/17 00:00:00)	Sa_FRAGILIS-M6-j7-exp1-liver_BA_54	baliver1	196	Sa_FRAGILIS-M6-j7-exp1-liver_GCMRM_54.D	(03/01/17 00:00:00)	Sa_FRAGILIS-M6-j7-exp1-liver_54	gcliver1	108
BURKO-j3-exp2-liver_14	Sa_BURKO-M2-j3-exp2-liver_SF_14.d	(02/08/17 00:00:00)	Sa_BURKO-M2-j3-exp2-liver_SF_14	sfliver2	42	Sa_BURKO-M2-j3-exp2-liver_PA_14.d	(04/03/17 00:00:00)	Sa_BURKO-M2-j3-exp2-liver_PA_14	paliver2	215	Sa_BURKO-M2-j3-exp2-liver_BA_14.d	(01/30/17 00:00:00)	Sa_BURKO-M2-j3-exp2-liver_BA_14	baliver2	127	Sa_BURKO-M2-j3-exp2-liver_GCMRM_14.D	(03/10/17 00:00:00)	Sa_BURKO-M2-j3-exp2-liver_14	gcliver2	214
FRAGILIS-j3-exp1-liver_22	Sa_FRAGILIS-M4-j3-exp1-liver_SF_22.d	(02/14/17 00:00:00)	Sa_FRAGILIS-M4-j3-exp1-liver_SF_22	sfliver1	185	Sa_FRAGILIS-M4-j3-exp1-liver_PA_22.d	(03/28/17 00:00:00)	Sa_FRAGILIS-M4-j3-exp1-liver_PA_22	paliver1	108	Sa_FRAGILIS-M4-j3-exp1-liver_BA_22.d	(02/02/17 00:00:00)	Sa_FRAGILIS-M4-j3-exp1-liver_BA_22	baliver1	197	Sa_FRAGILIS-M4-j3-exp1-liver_GCMRM_22.D	(03/01/17 00:00:00)	Sa_FRAGILIS-M4-j3-exp1-liver_22	gcliver1	109
BARNECIELA-j7-exp1-liver_58	Sa_BARNECIELA-M4-j7-exp1-liver_SF_58.d	(02/14/17 00:00:00)	Sa_BARNECIELA-M4-j7-exp1-liver_SF_58	sfliver1	186	Sa_BARNECIELA-M4-j7-exp1-liver_PA_58.d	(03/28/17 00:00:00)	Sa_BARNECIELA-M4-j7-exp1-liver_PA_58	paliver1	109	Sa_BARNECIELA-M4-j7-exp1-liver_BA_58.d	(02/02/17 00:00:00)	Sa_BARNECIELA-M4-j7-exp1-liver_BA_58	baliver1	198	Sa_BARNECIELA-M4-j7-exp1-liver_GCMRM_58.D	(03/01/17 00:00:00)	Sa_BARNECIELA-M4-j7-exp1-liver_58	gcliver1	110
MITSUAKI-j3-exp2-liver_20	Sa_MITSUAKI-M2-j3-exp2-liver_SF_20.d	(02/08/17 00:00:00)	Sa_MITSUAKI-M2-j3-exp2-liver_SF_20	sfliver2	44	Sa_MITSUAKI-M2-j3-exp2-liver_PA_20.d	(04/03/17 00:00:00)	Sa_MITSUAKI-M2-j3-exp2-liver_PA_20	paliver2	217	Sa_MITSUAKI-M2-j3-exp2-liver_BA_20.d	(01/30/17 00:00:00)	Sa_MITSUAKI-M2-j3-exp2-liver_BA_20	baliver2	128	Sa_MITSUAKI-M2-j3-exp2-liver_GCMRM_20.D	(03/10/17 00:00:00)	Sa_MITSUAKI-M2-j3-exp2-liver_20	gcliver2	216
Nacl-j3-exp1-liver_3	Sa_Nacl-M3-j3-exp1-liver_SF_3.d	(02/14/17 00:00:00)	Sa_Nacl-M3-j3-exp1-liver_SF_3	sfliver1	187	Sa_Nacl-M3-j3-exp1-liver_PA_3.d	(03/28/17 00:00:00)	Sa_Nacl-M3-j3-exp1-liver_PA_3	paliver1	110	Sa_Nacl-M3-j3-exp1-liver_BA_3.d	(02/02/17 00:00:00)	Sa_Nacl-M3-j3-exp1-liver_BA_3	baliver1	199	Sa_Nacl-M3-j3-exp1-liver_GCMRM_3.D	(03/01/17 00:00:00)	Sa_Nacl-M3-j3-exp1-liver_3	gcliver1	111
BURKO-j7-exp2-liver_42	Sa_BURKO-M6-j7-exp2-liver_SF_42.d	(02/08/17 00:00:00)	Sa_BURKO-M6-j7-exp2-liver_SF_42	sfliver2	45	Sa_BURKO-M6-j7-exp2-liver_PA_42.d	(04/03/17 00:00:00)	Sa_BURKO-M6-j7-exp2-liver_PA_42	paliver2	218	Sa_BURKO-M6-j7-exp2-liver_BA_42.d	(01/30/17 00:00:00)	Sa_BURKO-M6-j7-exp2-liver_BA_42	baliver2	129	Sa_BURKO-M6-j7-exp2-liver_GCMRM_42.D	(03/10/17 00:00:00)	Sa_BURKO-M6-j7-exp2-liver_42	gcliver2	217
ATB-j14-exp1-liver_65	Sa_ATB-M5-j14-exp1-liver_SF_65.d	(02/14/17 00:00:00)	Sa_ATB-M5-j14-exp1-liver_SF_65	sfliver1	188	Sa_ATB-M5-j14-exp1-liver_PA_65.d	(03/28/17 00:00:00)	Sa_ATB-M5-j14-exp1-liver_PA_65	paliver1	111	Sa_ATB-M5-j14-exp1-liver_BA_65.d	(02/02/17 00:00:00)	Sa_ATB-M5-j14-exp1-liver_BA_65	baliver1	200	Sa_ATB-M5-j14-exp1-liver_GCMRM_65.D	(03/01/17 00:00:00)	Sa_ATB-M5-j14-exp1-liver_65	gcliver1	112
ATB-j14-exp2-liver_50	Sa_ATB-M2-j14-exp2-liver_SF_50.d	(02/08/17 00:00:00)	Sa_ATB-M2-j14-exp2-liver_SF_50	sfliver2	46	Sa_ATB-M2-j14-exp2-liver_PA_50.d	(04/03/17 00:00:00)	Sa_ATB-M2-j14-exp2-liver_PA_50	paliver2	219	Sa_ATB-M2-j14-exp2-liver_BA_50.d	(01/30/17 00:00:00)	Sa_ATB-M2-j14-exp2-liver_BA_50	baliver2	130	Sa_ATB-M2-j14-exp2-liver_GCMRM_50.D	(03/10/17 00:00:00)	Sa_ATB-M2-j14-exp2-liver_50	gcliver2	218
Nacl-j7-exp1-liver_33	Sa_Nacl-M3-j7-exp1-liver_SF_33.d	(02/14/17 00:00:00)	Sa_Nacl-M3-j7-exp1-liver_SF_33	sfliver1	189	Sa_Nacl-M3-j7-exp1-liver_PA_33.d	(03/28/17 00:00:00)	Sa_Nacl-M3-j7-exp1-liver_PA_33	paliver1	112	Sa_Nacl-M3-j7-exp1-liver_BA_33.d	(02/02/17 00:00:00)	Sa_Nacl-M3-j7-exp1-liver_BA_33	baliver1	201	Sa_Nacl-M3-j7-exp1-liver_GCMRM_33.D	(03/01/17 00:00:00)	Sa_Nacl-M3-j7-exp1-liver_33	gcliver1	113
ATB-j3-exp1-liver_9	Sa_ATB-M3-j3-exp1-liver_SF_9.d	(02/14/17 00:00:00)	Sa_ATB-M3-j3-exp1-liver_SF_9	sfliver1	190	Sa_ATB-M3-j3-exp1-liver_PA_9.d	(03/28/17 00:00:00)	Sa_ATB-M3-j3-exp1-liver_PA_9	paliver1	113	Sa_ATB-M3-j3-exp1-liver_BA_9.d	(02/02/17 00:00:00)	Sa_ATB-M3-j3-exp1-liver_BA_9	baliver1	202	Sa_ATB-M3-j3-exp1-liver_GCMRM_9.D	(03/01/17 00:00:00)	Sa_ATB-M3-j3-exp1-liver_9	gcliver1	114
MITSUAKI-j7-exp2-liver_44	Sa_MITSUAKI-M2-j7-exp2-liver_SF_44.d	(02/08/17 00:00:00)	Sa_MITSUAKI-M2-j7-exp2-liver_SF_44	sfliver2	48	Sa_MITSUAKI-M2-j7-exp2-liver_PA_44.d	(04/03/17 00:00:00)	Sa_MITSUAKI-M2-j7-exp2-liver_PA_44	paliver2	221	Sa_MITSUAKI-M2-j7-exp2-liver_BA_44.d	(01/30/17 00:00:00)	Sa_MITSUAKI-M2-j7-exp2-liver_BA_44	baliver2	132	Sa_MITSUAKI-M2-j7-exp2-liver_GCMRM_44.D	(03/10/17 00:00:00)	Sa_MITSUAKI-M2-j7-exp2-liver_44	gcliver2	220
HIRAE-j7-exp1-liver_43	Sa_HIRAE-M1-j7-exp1-liver_SF_43.d	(02/14/17 00:00:00)	Sa_HIRAE-M1-j7-exp1-liver_SF_43	sfliver1	191	Sa_HIRAE-M1-j7-exp1-liver_PA_43.d	(03/28/17 00:00:00)	Sa_HIRAE-M1-j7-exp1-liver_PA_43	paliver1	114	Sa_HIRAE-M1-j7-exp1-liver_BA_43.d	(02/02/17 00:00:00)	Sa_HIRAE-M1-j7-exp1-liver_BA_43	baliver1	203	Sa_HIRAE-M1-j7-exp1-liver_GCMRM_43.D	(03/01/17 00:00:00)	Sa_HIRAE-M1-j7-exp1-liver_43	gcliver1	115
ATB-j14-exp2-liver_51	Sa_ATB-M3-j14-exp2-liver_SF_51.d	(02/08/17 00:00:00)	Sa_ATB-M3-j14-exp2-liver_SF_51	sfliver2	49	Sa_ATB-M3-j14-exp2-liver_PA_51.d	(04/03/17 00:00:00)	Sa_ATB-M3-j14-exp2-liver_PA_51	paliver2	222	Sa_ATB-M3-j14-exp2-liver_BA_51.d	(01/30/17 00:00:00)	Sa_ATB-M3-j14-exp2-liver_BA_51	baliver2	133	Sa_ATB-M3-j14-exp2-liver_GCMRM_51.D	(03/10/17 00:00:00)	Sa_ATB-M3-j14-exp2-liver_51	gcliver2	221
Nacl-j3-exp1-liver_5	Sa_Nacl-M5-j3-exp1-liver_SF_5.d	(02/14/17 00:00:00)	Sa_Nacl-M5-j3-exp1-liver_SF_5	sfliver1	192	Sa_Nacl-M5-j3-exp1-liver_PA_5.d	(03/28/17 00:00:00)	Sa_Nacl-M5-j3-exp1-liver_PA_5	paliver1	115	Sa_Nacl-M5-j3-exp1-liver_BA_5.d	(02/02/17 00:00:00)	Sa_Nacl-M5-j3-exp1-liver_BA_5	baliver1	204	Sa_Nacl-M5-j3-exp1-liver_GCMRM_5.D	(03/01/17 00:00:00)	Sa_Nacl-M5-j3-exp1-liver_5	gcliver1	116
BURKO-j14-exp2-liver_56	Sa_BURKO-M2-j14-exp2-liver_SF_56.d	(02/08/17 00:00:00)	Sa_BURKO-M2-j14-exp2-liver_SF_56	sfliver2	50	Sa_BURKO-M2-j14-exp2-liver_PA_56.d	(04/03/17 00:00:00)	Sa_BURKO-M2-j14-exp2-liver_PA_56	paliver2	223	Sa_BURKO-M2-j14-exp2-liver_BA_56.d	(01/30/17 00:00:00)	Sa_BURKO-M2-j14-exp2-liver_BA_56	baliver2	134	Sa_BURKO-M2-j14-exp2-liver_GCMRM_56.D	(03/10/17 00:00:00)	Sa_BURKO-M2-j14-exp2-liver_56	gcliver2	222
FRAGILIS-j14-exp1-liver_73	Sa_FRAGILIS-M1-j14-exp1-liver_SF_73.d	(02/14/17 00:00:00)	Sa_FRAGILIS-M1-j14-exp1-liver_SF_73	sfliver1	193	Sa_FRAGILIS-M1-j14-exp1-liver_PA_73.d	(03/28/17 00:00:00)	Sa_FRAGILIS-M1-j14-exp1-liver_PA_73	paliver1	116	Sa_FRAGILIS-M1-j14-exp1-liver_BA_73.d	(02/02/17 00:00:00)	Sa_FRAGILIS-M1-j14-exp1-liver_BA_73	baliver1	205	Sa_FRAGILIS-M1-j14-exp1-liver_GCMRM_73.D	(03/01/17 00:00:00)	Sa_FRAGILIS-M1-j14-exp1-liver_73	gcliver1	117
Nacl-j3-exp2-liver_4	Sa_Nacl-M4-j3-exp2-liver_SF_4.d	(02/08/17 00:00:00)	Sa_Nacl-M4-j3-exp2-liver_SF_4	sfliver2	43	Sa_Nacl-M4-j3-exp2-liver_PA_4.d	(04/03/17 00:00:00)	Sa_Nacl-M4-j3-exp2-liver_PA_4	paliver2	216	Sa_Nacl-M4-j3-exp2-liver_BA_4b.d	(01/30/17 00:00:00)	Sa_Nacl-M4-j3-exp2-liver_BA_4b	baliver2	158	Sa_Nacl-M4-j3-exp2-liver_GCMRM_4.D	(03/10/17 00:00:00)	Sa_Nacl-M4-j3-exp2-liver_4	gcliver2	215
MITSUAKI-j14-exp2-liver_62	Sa_MITSUAKI-M2-j14-exp2-liver_SF_62.d	(02/08/17 00:00:00)	Sa_MITSUAKI-M2-j14-exp2-liver_SF_62	sfliver2	51	Sa_MITSUAKI-M2-j14-exp2-liver_PA_62.d	(04/03/17 00:00:00)	Sa_MITSUAKI-M2-j14-exp2-liver_PA_62	paliver2	224	Sa_MITSUAKI-M2-j14-exp2-liver_BA_62.d	(01/30/17 00:00:00)	Sa_MITSUAKI-M2-j14-exp2-liver_BA_62	baliver2	135	Sa_MITSUAKI-M2-j14-exp2-liver_GCMRM_62.D	(03/10/17 00:00:00)	Sa_MITSUAKI-M2-j14-exp2-liver_62	gcliver2	223
FRAGILIS-j14-exp1-liver_78	Sa_FRAGILIS-M6-j14-exp1-liver_SF_78.d	(02/14/17 00:00:00)	Sa_FRAGILIS-M6-j14-exp1-liver_SF_78	sfliver1	194	Sa_FRAGILIS-M6-j14-exp1-liver_PA_78.d	(03/28/17 00:00:00)	Sa_FRAGILIS-M6-j14-exp1-liver_PA_78	paliver1	117	Sa_FRAGILIS-M6-j14-exp1-liver_BA_78.d	(02/02/17 00:00:00)	Sa_FRAGILIS-M6-j14-exp1-liver_BA_78	baliver1	206	Sa_FRAGILIS-M6-j14-exp1-liver_GCMRM_78.D	(03/01/17 00:00:00)	Sa_FRAGILIS-M6-j14-exp1-liver_78	gcliver1	118
ATB-j3-exp2-liver_11	Sa_ATB-M5-j3-exp2-liver_SF_11.d	(02/08/17 00:00:00)	Sa_ATB-M5-j3-exp2-liver_SF_11	sfliver2	52	Sa_ATB-M5-j3-exp2-liver_PA_11.d	(04/03/17 00:00:00)	Sa_ATB-M5-j3-exp2-liver_PA_11	paliver2	225	Sa_ATB-M5-j3-exp2-liver_BA_11.d	(01/30/17 00:00:00)	Sa_ATB-M5-j3-exp2-liver_BA_11	baliver2	136	Sa_ATB-M5-j3-exp2-liver_GCMRM_11.D	(03/10/17 00:00:00)	Sa_ATB-M5-j3-exp2-liver_11	gcliver2	224
BURKO-j7-exp2-liver_37	Sa_BURKO-M1-j7-exp2-liver_SF_37.d	(02/08/17 00:00:00)	Sa_BURKO-M1-j7-exp2-liver_SF_37	sfliver2	53	Sa_BURKO-M1-j7-exp2-liver_PA_37.d	(04/03/17 00:00:00)	Sa_BURKO-M1-j7-exp2-liver_PA_37	paliver2	226	Sa_BURKO-M1-j7-exp2-liver_BA_37.d	(01/30/17 00:00:00)	Sa_BURKO-M1-j7-exp2-liver_BA_37	baliver2	137	Sa_BURKO-M1-j7-exp2-liver_GCMRM_37.D	(03/10/17 00:00:00)	Sa_BURKO-M1-j7-exp2-liver_37	gcliver2	225
FRAGILIS-j7-exp1-liver_51	Sa_FRAGILIS-M3-j7-exp1-liver_SF_51.d	(02/14/17 00:00:00)	Sa_FRAGILIS-M3-j7-exp1-liver_SF_51	sfliver1	196	Sa_FRAGILIS-M3-j7-exp1-liver_PA_51.d	(03/28/17 00:00:00)	Sa_FRAGILIS-M3-j7-exp1-liver_PA_51	paliver1	119	Sa_FRAGILIS-M3-j7-exp1-liver_BA_51.d	(02/02/17 00:00:00)	Sa_FRAGILIS-M3-j7-exp1-liver_BA_51	baliver1	208	Sa_FRAGILIS-M3-j7-exp1-liver_GCMRM_51.D	(03/01/17 00:00:00)	Sa_FRAGILIS-M3-j7-exp1-liver_51	gcliver1	120
ATB-j7-exp2-liver_36	Sa_ATB-M6-j7-exp2-liver_SF_36.d	(02/08/17 00:00:00)	Sa_ATB-M6-j7-exp2-liver_SF_36	sfliver2	54	Sa_ATB-M6-j7-exp2-liver_PA_36.d	(04/03/17 00:00:00)	Sa_ATB-M6-j7-exp2-liver_PA_36	paliver2	227	Sa_ATB-M6-j7-exp2-liver_BA_36.d	(01/30/17 00:00:00)	Sa_ATB-M6-j7-exp2-liver_BA_36	baliver2	138	Sa_ATB-M6-j7-exp2-liver_GCMRM_36.D	(03/10/17 00:00:00)	Sa_ATB-M6-j7-exp2-liver_36	gcliver2	226
Nacl-j3-exp1-liver_2	Sa_Nacl-M2-j3-exp1-liver_SF_2.d	(02/14/17 00:00:00)	Sa_Nacl-M2-j3-exp1-liver_SF_2	sfliver1	197	Sa_Nacl-M2-j3-exp1-liver_PA_2.d	(03/28/17 00:00:00)	Sa_Nacl-M2-j3-exp1-liver_PA_2	paliver1	120	Sa_Nacl-M2-j3-exp1-liver_BA_2.d	(02/02/17 00:00:00)	Sa_Nacl-M2-j3-exp1-liver_BA_2	baliver1	209	Sa_Nacl-M2-j3-exp1-liver_GCMRM_2.D	(03/01/17 00:00:00)	Sa_Nacl-M2-j3-exp1-liver_2	gcliver1	121
Nacl-j7-exp2-liver_25	Sa_Nacl-M1-j7-exp2-liver_SF_25.d	(02/08/17 00:00:00)	Sa_Nacl-M1-j7-exp2-liver_SF_25	sfliver2	55	Sa_Nacl-M1-j7-exp2-liver_PA_25.d	(04/03/17 00:00:00)	Sa_Nacl-M1-j7-exp2-liver_PA_25	paliver2	228	Sa_Nacl-M1-j7-exp2-liver_BA_25.d	(01/30/17 00:00:00)	Sa_Nacl-M1-j7-exp2-liver_BA_25	baliver2	139	Sa_Nacl-M1-j7-exp2-liver_GCMRM_25.D	(03/10/17 00:00:00)	Sa_Nacl-M1-j7-exp2-liver_25	gcliver2	227
FRAGILIS-j3-exp1-liver_23	Sa_FRAGILIS-M5-j3-exp1-liver_SF_23.d	(02/14/17 00:00:00)	Sa_FRAGILIS-M5-j3-exp1-liver_SF_23	sfliver1	198	Sa_FRAGILIS-M5-j3-exp1-liver_PA_23.d	(03/28/17 00:00:00)	Sa_FRAGILIS-M5-j3-exp1-liver_PA_23	paliver1	121	Sa_FRAGILIS-M5-j3-exp1-liver_BA_23.d	(02/02/17 00:00:00)	Sa_FRAGILIS-M5-j3-exp1-liver_BA_23	baliver1	210	Sa_FRAGILIS-M5-j3-exp1-liver_GCMRM_23.D	(03/01/17 00:00:00)	Sa_FRAGILIS-M5-j3-exp1-liver_23	gcliver1	122
BURKO-j3-exp2-liver_13	Sa_BURKO-M1-j3-exp2-liver_SF_13.d	(02/08/17 00:00:00)	Sa_BURKO-M1-j3-exp2-liver_SF_13	sfliver2	56	Sa_BURKO-M1-j3-exp2-liver_PA_13.d	(04/03/17 00:00:00)	Sa_BURKO-M1-j3-exp2-liver_PA_13	paliver2	229	Sa_BURKO-M1-j3-exp2-liver_BA_13.d	(01/30/17 00:00:00)	Sa_BURKO-M1-j3-exp2-liver_BA_13	baliver2	140	Sa_BURKO-M1-j3-exp2-liver_GCMRM_13.D	(03/10/17 00:00:00)	Sa_BURKO-M1-j3-exp2-liver_13	gcliver2	228
HIRAE-j14-exp1-liver_72	Sa_HIRAE-M6-j14-exp1-liver_SF_72.d	(02/14/17 00:00:00)	Sa_HIRAE-M6-j14-exp1-liver_SF_72	sfliver1	199	Sa_HIRAE-M6-j14-exp1-liver_PA_72.d	(03/28/17 00:00:00)	Sa_HIRAE-M6-j14-exp1-liver_PA_72	paliver1	122	Sa_HIRAE-M6-j14-exp1-liver_BA_72.d	(02/02/17 00:00:00)	Sa_HIRAE-M6-j14-exp1-liver_BA_72	baliver1	211	Sa_HIRAE-M6-j14-exp1-liver_GCMRM_72.D	(03/01/17 00:00:00)	Sa_HIRAE-M6-j14-exp1-liver_72	gcliver1	123
Nacl-j3-exp2-liver_1	Sa_Nacl-M1-j3-exp2-liver_SF_1.d	(02/08/17 00:00:00)	Sa_Nacl-M1-j3-exp2-liver_SF_1	sfliver2	57	Sa_Nacl-M1-j3-exp2-liver_PA_1.d	(04/03/17 00:00:00)	Sa_Nacl-M1-j3-exp2-liver_PA_1	paliver2	230	Sa_Nacl-M1-j3-exp2-liver_BA_1.d	(01/30/17 00:00:00)	Sa_Nacl-M1-j3-exp2-liver_BA_1	baliver2	141	Sa_Nacl-M1-j3-exp2-liver_GCMRM_1.D	(03/10/17 00:00:00)	Sa_Nacl-M1-j3-exp2-liver_1	gcliver2	229
ATB-j7-exp1-liver_37	Sa_ATB-M1-j7-exp1-liver_SF_37.d	(02/14/17 00:00:00)	Sa_ATB-M1-j7-exp1-liver_SF_37	sfliver1	200	Sa_ATB-M1-j7-exp1-liver_PA_37.d	(03/28/17 00:00:00)	Sa_ATB-M1-j7-exp1-liver_PA_37	paliver1	123	Sa_ATB-M1-j7-exp1-liver_BA_37.d	(02/02/17 00:00:00)	Sa_ATB-M1-j7-exp1-liver_BA_37	baliver1	212	Sa_ATB-M1-j7-exp1-liver_GCMRM_37.D	(03/01/17 00:00:00)	Sa_ATB-M1-j7-exp1-liver_37	gcliver1	124
ATB-j3-exp2-liver_7	Sa_ATB-M1-j3-exp2-liver_SF_7.d	(02/08/17 00:00:00)	Sa_ATB-M1-j3-exp2-liver_SF_7	sfliver2	58	Sa_ATB-M1-j3-exp2-liver_PA_7.d	(04/03/17 00:00:00)	Sa_ATB-M1-j3-exp2-liver_PA_7	paliver2	231	Sa_ATB-M1-j3-exp2-liver_BA_7.d	(01/30/17 00:00:00)	Sa_ATB-M1-j3-exp2-liver_BA_7	baliver2	142	Sa_ATB-M1-j3-exp2-liver_GCMRM_7.D	(03/10/17 00:00:00)	Sa_ATB-M1-j3-exp2-liver_7	gcliver2	230
FRAGILIS-j3-exp1-liver_19	Sa_FRAGILIS-M1-j3-exp1-liver_SF_19.d	(02/14/17 00:00:00)	Sa_FRAGILIS-M1-j3-exp1-liver_SF_19	sfliver1	201	Sa_FRAGILIS-M1-j3-exp1-liver_PA_19.d	(03/28/17 00:00:00)	Sa_FRAGILIS-M1-j3-exp1-liver_PA_19	paliver1	124	Sa_FRAGILIS-M1-j3-exp1-liver_BA_19.d	(02/02/17 00:00:00)	Sa_FRAGILIS-M1-j3-exp1-liver_BA_19	baliver1	213	Sa_FRAGILIS-M1-j3-exp1-liver_GCMRM_19.D	(03/01/17 00:00:00)	Sa_FRAGILIS-M1-j3-exp1-liver_19	gcliver1	125
MITSUAKI-j3-exp2-liver_19	Sa_MITSUAKI-M1-j3-exp2-liver_SF_19.d	(02/08/17 00:00:00)	Sa_MITSUAKI-M1-j3-exp2-liver_SF_19	sfliver2	59	Sa_MITSUAKI-M1-j3-exp2-liver_PA_19.d	(04/03/17 00:00:00)	Sa_MITSUAKI-M1-j3-exp2-liver_PA_19	paliver2	232	Sa_MITSUAKI-M1-j3-exp2-liver_BA_19.d	(01/30/17 00:00:00)	Sa_MITSUAKI-M1-j3-exp2-liver_BA_19	baliver2	143	Sa_MITSUAKI-M1-j3-exp2-liver_GCMRM_19.D	(03/10/17 00:00:00)	Sa_MITSUAKI-M1-j3-exp2-liver_19	gcliver2	231
ATB-j14-exp1-liver_63	Sa_ATB-M3-j14-exp1-liver_SF_63.d	(02/14/17 00:00:00)	Sa_ATB-M3-j14-exp1-liver_SF_63	sfliver1	202	Sa_ATB-M3-j14-exp1-liver_PA_63.d	(03/28/17 00:00:00)	Sa_ATB-M3-j14-exp1-liver_PA_63	paliver1	125	Sa_ATB-M3-j14-exp1-liver_BA_63.d	(02/02/17 00:00:00)	Sa_ATB-M3-j14-exp1-liver_BA_63	baliver1	214	Sa_ATB-M3-j14-exp1-liver_GCMRM_63.D	(03/01/17 00:00:00)	Sa_ATB-M3-j14-exp1-liver_63	gcliver1	126
ATB-j7-exp1-liver_38	Sa_ATB-M2-j7-exp1-liver_SF_38.d	(02/14/17 00:00:00)	Sa_ATB-M2-j7-exp1-liver_SF_38	sfliver1	203	Sa_ATB-M2-j7-exp1-liver_PA_38.d	(03/28/17 00:00:00)	Sa_ATB-M2-j7-exp1-liver_PA_38	paliver1	126	Sa_ATB-M2-j7-exp1-liver_BA_38.d	(02/02/17 00:00:00)	Sa_ATB-M2-j7-exp1-liver_BA_38	baliver1	215	Sa_ATB-M2-j7-exp1-liver_GCMRM_38.D	(03/01/17 00:00:00)	Sa_ATB-M2-j7-exp1-liver_38	gcliver1	127
ATB-j7-exp2-liver_31	Sa_ATB-M1-j7-exp2-liver_SF_31.d	(02/08/17 00:00:00)	Sa_ATB-M1-j7-exp2-liver_SF_31	sfliver2	61	Sa_ATB-M1-j7-exp2-liver_PA_31.d	(04/03/17 00:00:00)	Sa_ATB-M1-j7-exp2-liver_PA_31	paliver2	234	Sa_ATB-M1-j7-exp2-liver_BA_31.d	(01/30/17 00:00:00)	Sa_ATB-M1-j7-exp2-liver_BA_31	baliver2	145	Sa_ATB-M1-j7-exp2-liver_GCMRM_31.D	(03/10/17 00:00:00)	Sa_ATB-M1-j7-exp2-liver_31	gcliver2	233
BARNECIELA-j7-exp1-liver_55	Sa_ARNECIELA-M1-j7-exp1-liver_SF_55.d	(02/14/17 00:00:00)	Sa_ARNECIELA-M1-j7-exp1-liver_SF_55	sfliver1	204	Sa_BARNECIELA-M1-j7-exp1-liver_PA_55.d	(03/28/17 00:00:00)	Sa_BARNECIELA-M1-j7-exp1-liver_PA_55	paliver1	127	Sa_ARNECIELA-M1-j7-exp1-liver_BA_55.d	(02/02/17 00:00:00)	Sa_ARNECIELA-M1-j7-exp1-liver_BA_55	baliver1	216	Sa_ARNECIELA-M1-j7-exp1-liver_GCMRM_55.D	(03/01/17 00:00:00)	Sa_ARNECIELA-M1-j7-exp1-liver_55	gcliver1	128
BURKO-j14-exp2-liver_55	Sa_BURKO-M1-j14-exp2-liver_SF_55.d	(02/08/17 00:00:00)	Sa_BURKO-M1-j14-exp2-liver_SF_55	sfliver2	62	Sa_BURKO-M1-j14-exp2-liver_PA_55.d	(04/03/17 00:00:00)	Sa_BURKO-M1-j14-exp2-liver_PA_55	paliver2	235	Sa_BURKO-M1-j14-exp2-liver_BA_55.d	(01/30/17 00:00:00)	Sa_BURKO-M1-j14-exp2-liver_BA_55	baliver2	146	Sa_BURKO-M1-j14-exp2-liver_GCMRM_55.D	(03/10/17 00:00:00)	Sa_BURKO-M1-j14-exp2-liver_55	gcliver2	234
BARNECIELA-j3-exp1-liver_28	Sa_BARNECIELA-M4-j3-exp1-liver_SF_28.d	(02/14/17 00:00:00)	Sa_BARNECIELA-M4-j3-exp1-liver_SF_28	sfliver1	205	Sa_BARNECIELA-M4-j3-exp1-liver_PA_28.d	(03/28/17 00:00:00)	Sa_BARNECIELA-M4-j3-exp1-liver_PA_28	paliver1	128	Sa_BARNECIELA-M4-j3-exp1-liver_BA_28.d	(02/02/17 00:00:00)	Sa_BARNECIELA-M4-j3-exp1-liver_BA_28	baliver1	217	Sa_BARNECIELA-M4-j3-exp1-liver_GCMRM_28.D	(03/01/17 00:00:00)	Sa_BARNECIELA-M4-j3-exp1-liver_28	gcliver1	129
Nacl-j3-exp2-liver_6	Sa_Nacl-M6-j3-exp2-liver_SF_6.d	(02/08/17 00:00:00)	Sa_Nacl-M6-j3-exp2-liver_SF_6	sfliver2	63	Sa_Nacl-M6-j3-exp2-liver_PA_6.d	(04/03/17 00:00:00)	Sa_Nacl-M6-j3-exp2-liver_PA_6	paliver2	236	Sa_Nacl-M6-j3-exp2-liver_BA_6.d	(01/30/17 00:00:00)	Sa_Nacl-M6-j3-exp2-liver_BA_6	baliver2	147	Sa_Nacl-M6-j3-exp2-liver_GCMRM_6.D	(03/10/17 00:00:00)	Sa_Nacl-M6-j3-exp2-liver_6	gcliver2	235
Nacl-j7-exp1-liver_34	Sa_Nacl-M4-j7-exp1-liver_SF_34.d	(02/14/17 00:00:00)	Sa_Nacl-M4-j7-exp1-liver_SF_34	sfliver1	206	Sa_Nacl-M4-j7-exp1-liver_PA_34.d	(03/28/17 00:00:00)	Sa_Nacl-M4-j7-exp1-liver_PA_34	paliver1	129	Sa_Nacl-M4-j7-exp1-liver_BA_34.d	(02/02/17 00:00:00)	Sa_Nacl-M4-j7-exp1-liver_BA_34	baliver1	218	Sa_Nacl-M4-j7-exp1-liver_GCMRM_34.D	(03/01/17 00:00:00)	Sa_Nacl-M4-j7-exp1-liver_34	gcliver1	130
ATB-j14-exp2-liver_54	Sa_ATB-M6-j14-exp2-liver_SF_54.d	(02/08/17 00:00:00)	Sa_ATB-M6-j14-exp2-liver_SF_54	sfliver2	64	Sa_ATB-M6-j14-exp2-liver_PA_54.d	(04/03/17 00:00:00)	Sa_ATB-M6-j14-exp2-liver_PA_54	paliver2	237	Sa_ATB-M6-j14-exp2-liver_BA_54.d	(01/30/17 00:00:00)	Sa_ATB-M6-j14-exp2-liver_BA_54	baliver2	148	Sa_ATB-M6-j14-exp2-liver_GCMRM_54.D	(03/10/17 00:00:00)	Sa_ATB-M6-j14-exp2-liver_54	gcliver2	236
Nacl-j3-exp1-liver_4	Sa_Nacl-M4-j3-exp1-liver_SF_4.d	(02/14/17 00:00:00)	Sa_Nacl-M4-j3-exp1-liver_SF_4	sfliver1	207	Sa_Nacl-M4-j3-exp1-liver_PA_4.d	(03/28/17 00:00:00)	Sa_Nacl-M4-j3-exp1-liver_PA_4	paliver1	130	Sa_Nacl-M4-j3-exp1-liver_BA_4.d	(02/02/17 00:00:00)	Sa_Nacl-M4-j3-exp1-liver_BA_4	baliver1	219	Sa_Nacl-M4-j3-exp1-liver_GCMRM_4.D	(03/01/17 00:00:00)	Sa_Nacl-M4-j3-exp1-liver_4	gcliver1	131
MITSUAKI-j14-exp2-liver_61	Sa_MITSUAKI-M1-j14-exp2-liver_SF_61.d	(02/08/17 00:00:00)	Sa_MITSUAKI-M1-j14-exp2-liver_SF_61	sfliver2	65	Sa_MITSUAKI-M1-j14-exp2-liver_PA_61.d	(04/03/17 00:00:00)	Sa_MITSUAKI-M1-j14-exp2-liver_PA_61	paliver2	238	Sa_MITSUAKI-M1-j14-exp2-liver_BA_61.d	(01/30/17 00:00:00)	Sa_MITSUAKI-M1-j14-exp2-liver_BA_61	baliver2	149	Sa_MITSUAKI-M1-j14-exp2-liver_GCMRM_61.D	(03/10/17 00:00:00)	Sa_MITSUAKI-M1-j14-exp2-liver_61	gcliver2	237
MITSUAKI-j3-exp2-liver_23	Sa_MITSUAKI-M5-j3-exp2-liver_SF_23.d	(02/08/17 00:00:00)	Sa_MITSUAKI-M5-j3-exp2-liver_SF_23	sfliver2	66	Sa_MITSUAKI-M5-j3-exp2-liver_PA_23.d	(04/03/17 00:00:00)	Sa_MITSUAKI-M5-j3-exp2-liver_PA_23	paliver2	239	Sa_MITSUAKI-M5-j3-exp2-liver_BA_23.d	(01/30/17 00:00:00)	Sa_MITSUAKI-M5-j3-exp2-liver_BA_23	baliver2	150	Sa_MITSUAKI-M5-j3-exp2-liver_GCMRM_23.D	(03/10/17 00:00:00)	Sa_MITSUAKI-M5-j3-exp2-liver_23	gcliver2	238
BARNECIELA-j7-exp1-liver_59	Sa_BARNECIELA-M5-j7-exp1-liver_SF_59.d	(02/14/17 00:00:00)	Sa_BARNECIELA-M5-j7-exp1-liver_SF_59	sfliver1	209	Sa_BARNECIELA-M5-j7-exp1-liver_PA_59.d	(03/28/17 00:00:00)	Sa_BARNECIELA-M5-j7-exp1-liver_PA_59	paliver1	132	Sa_BARNECIELA-M5-j7-exp1-liver_BA_59.d	(02/02/17 00:00:00)	Sa_BARNECIELA-M5-j7-exp1-liver_BA_59	baliver1	221	Sa_BARNECIELA-M5-j7-exp1-liver_GCMRM_59.D	(03/01/17 00:00:00)	Sa_BARNECIELA-M5-j7-exp1-liver_59	gcliver1	133
BURKO-j14-exp2-liver_60	Sa_BURKO-M6-j14-exp2-liver_SF_60.d	(02/08/17 00:00:00)	Sa_BURKO-M6-j14-exp2-liver_SF_60	sfliver2	67	Sa_BURKO-M6-j14-exp2-liver_PA_60.d	(04/03/17 00:00:00)	Sa_BURKO-M6-j14-exp2-liver_PA_60	paliver2	240	Sa_BURKO-M6-j14-exp2-liver_BA_60.d	(01/30/17 00:00:00)	Sa_BURKO-M6-j14-exp2-liver_BA_60	baliver2	151	Sa_BURKO-M6-j14-exp2-liver_GCMRM_60.D	(03/10/17 00:00:00)	Sa_BURKO-M6-j14-exp2-liver_60	gcliver2	239
HIRAE-j7-exp1-liver_46	Sa_HIRAE-M4-j7-exp1-liver_SF_46.d	(02/14/17 00:00:00)	Sa_HIRAE-M4-j7-exp1-liver_SF_46	sfliver1	210	Sa_HIRAE-M4-j7-exp1-liver_PA_46.d	(03/28/17 00:00:00)	Sa_HIRAE-M4-j7-exp1-liver_PA_46	paliver1	133	Sa_HIRAE-M4-j7-exp1-liver_BA_46.d	(02/02/17 00:00:00)	Sa_HIRAE-M4-j7-exp1-liver_BA_46	baliver1	222	Sa_HIRAE-M4-j7-exp1-liver_GCMRM_46.D	(03/01/17 00:00:00)	Sa_HIRAE-M4-j7-exp1-liver_46	gcliver1	134
MITSUAKI-j7-exp2-liver_48	Sa_MITSUAKI-M6-j7-exp2-liver_SF_48.d	(02/08/17 00:00:00)	Sa_MITSUAKI-M6-j7-exp2-liver_SF_48	sfliver2	68	Sa_MITSUAKI-M6-j7-exp2-liver_PA_48.d	(04/03/17 00:00:00)	Sa_MITSUAKI-M6-j7-exp2-liver_PA_48	paliver2	241	Sa_MITSUAKI-M6-j7-exp2-liver_BA_48.d	(01/30/17 00:00:00)	Sa_MITSUAKI-M6-j7-exp2-liver_BA_48	baliver2	152	Sa_MITSUAKI-M6-j7-exp2-liver_GCMRM_48.D	(03/10/17 00:00:00)	Sa_MITSUAKI-M6-j7-exp2-liver_48	gcliver2	240
HIRAE-j3-exp1-liver_16	Sa_HIRAE-M4-j3-exp1-liver_SF_16.d	(02/14/17 00:00:00)	Sa_HIRAE-M4-j3-exp1-liver_SF_16	sfliver1	211	Sa_HIRAE-M4-j3-exp1-liver_PA_16.d	(03/28/17 00:00:00)	Sa_HIRAE-M4-j3-exp1-liver_PA_16	paliver1	134	Sa_HIRAE-M4-j3-exp1-liver_BA_16.d	(02/02/17 00:00:00)	Sa_HIRAE-M4-j3-exp1-liver_BA_16	baliver1	223	Sa_HIRAE-M4-j3-exp1-liver_GCMRM_16.D	(03/01/17 00:00:00)	Sa_HIRAE-M4-j3-exp1-liver_16	gcliver1	135
BURKO-j7-exp2-liver_41	Sa_BURKO-M5-j7-exp2-liver_SF_41.d	(02/08/17 00:00:00)	Sa_BURKO-M5-j7-exp2-liver_SF_41	sfliver2	69	Sa_BURKO-M5-j7-exp2-liver_PA_41.d	(04/03/17 00:00:00)	Sa_BURKO-M5-j7-exp2-liver_PA_41	paliver2	242	Sa_BURKO-M5-j7-exp2-liver_BA_41.d	(01/30/17 00:00:00)	Sa_BURKO-M5-j7-exp2-liver_BA_41	baliver2	153	Sa_BURKO-M5-j7-exp2-liver_GCMRM_41.D	(03/10/17 00:00:00)	Sa_BURKO-M5-j7-exp2-liver_41	gcliver2	241
BARNECIELA-j3-exp1-liver_29	Sa_BARNECIELA-M5-j3-exp1-liver_SF_29.d	(02/14/17 00:00:00)	Sa_BARNECIELA-M5-j3-exp1-liver_SF_29	sfliver1	212	Sa_BARNECIELA-M5-j3-exp1-liver_PA_29.d	(03/31/17 00:00:00)	Sa_BARNECIELA-M5-j3-exp1-liver_PA_29	paliver1	135	Sa_BARNECIELA-M5-j3-exp1-liver_BA_29.d	(02/02/17 00:00:00)	Sa_BARNECIELA-M5-j3-exp1-liver_BA_29	baliver1	224	Sa_BARNECIELA-M5-j3-exp1-liver_GCMRM_29.D	(03/01/17 00:00:00)	Sa_BARNECIELA-M5-j3-exp1-liver_29	gcliver1	136
Nacl-j7-exp2-liver_30	Sa_Nacl-M6-j7-exp2-liver_SF_30.d	(02/08/17 00:00:00)	Sa_Nacl-M6-j7-exp2-liver_SF_30	sfliver2	70	Sa_Nacl-M6-j7-exp2-liver_PA_30.d	(04/03/17 00:00:00)	Sa_Nacl-M6-j7-exp2-liver_PA_30	paliver2	243	Sa_Nacl-M6-j7-exp2-liver_BA_30.d	(01/30/17 00:00:00)	Sa_Nacl-M6-j7-exp2-liver_BA_30	baliver2	154	Sa_Nacl-M6-j7-exp2-liver_GCMRM_30.D	(03/10/17 00:00:00)	Sa_Nacl-M6-j7-exp2-liver_30	gcliver2	242
HIRAE-j3-exp1-liver_13	Sa_HIRAE-M1-j3-exp1-liver_SF_13.d	(02/14/17 00:00:00)	Sa_HIRAE-M1-j3-exp1-liver_SF_13	sfliver1	213	Sa_HIRAE-M1-j3-exp1-liver_PA_13.d	(03/31/17 00:00:00)	Sa_HIRAE-M1-j3-exp1-liver_PA_13	paliver1	136	Sa_HIRAE-M1-j3-exp1-liver_BA_13.d	(02/02/17 00:00:00)	Sa_HIRAE-M1-j3-exp1-liver_BA_13	baliver1	225	Sa_HIRAE-M1-j3-exp1-liver_GCMRM_13.D	(03/01/17 00:00:00)	Sa_HIRAE-M1-j3-exp1-liver_13	gcliver1	137
MITSUAKI-j7-exp2-liver_43	Sa_MITSUAKI-M1-j7-exp2-liver_SF_43.d	(02/08/17 00:00:00)	Sa_MITSUAKI-M1-j7-exp2-liver_SF_43	sfliver2	71	Sa_MITSUAKI-M1-j7-exp2-liver_PA_43.d	(04/06/17 00:00:00)	Sa_MITSUAKI-M1-j7-exp2-liver_PA_43	paliver2	244	Sa_MITSUAKI-M1-j7-exp2-liver_BA_43.d	(01/30/17 00:00:00)	Sa_MITSUAKI-M1-j7-exp2-liver_BA_43	baliver2	155	Sa_MITSUAKI-M1-j7-exp2-liver_GCMRM_43.D	(03/10/17 00:00:00)	Sa_MITSUAKI-M1-j7-exp2-liver_43	gcliver2	243
HIRAE-j14-exp1-liver_69	Sa_HIRAE-M3-j14-exp1-liver_SF_69.d	(02/14/17 00:00:00)	Sa_HIRAE-M3-j14-exp1-liver_SF_69	sfliver1	214	Sa_HIRAE-M3-j14-exp1-liver_PA_69.d	(03/31/17 00:00:00)	Sa_HIRAE-M3-j14-exp1-liver_PA_69	paliver1	137	Sa_HIRAE-M3-j14-exp1-liver_BA_69.d	(02/02/17 00:00:00)	Sa_HIRAE-M3-j14-exp1-liver_BA_69	baliver1	226	Sa_HIRAE-M3-j14-exp1-liver_GCMRM_69.D	(03/01/17 00:00:00)	Sa_HIRAE-M3-j14-exp1-liver_69	gcliver1	138
ATB-j14-exp2-liver_49	Sa_ATB-M1-j14-exp2-liver_SF_49.d	(02/08/17 00:00:00)	Sa_ATB-M1-j14-exp2-liver_SF_49	sfliver2	72	Sa_ATB-M1-j14-exp2-liver_PA_49.d	(04/06/17 00:00:00)	Sa_ATB-M1-j14-exp2-liver_PA_49	paliver2	245	Sa_ATB-M1-j14-exp2-liver_BA_49.d	(01/30/17 00:00:00)	Sa_ATB-M1-j14-exp2-liver_BA_49	baliver2	156	Sa_ATB-M1-j14-exp2-liver_GCMRM_49.D	(03/10/17 00:00:00)	Sa_ATB-M1-j14-exp2-liver_49	gcliver2	244
BARNECIELA-j14-exp1-liver_80	Sa_BARNECIELA-M2-j14-exp1-liver_SF_80.d	(02/14/17 00:00:00)	Sa_BARNECIELA-M2-j14-exp1-liver_SF_80	sfliver1	215	Sa_BARNECIELA-M2-j14-exp1-liver_PA_80.d	(03/31/17 00:00:00)	Sa_BARNECIELA-M2-j14-exp1-liver_PA_80	paliver1	138	Sa_BARNECIELA-M2-j14-exp1-liver_BA_80.d	(02/02/17 00:00:00)	Sa_BARNECIELA-M2-j14-exp1-liver_BA_80	baliver1	227	Sa_BARNECIELA-M2-j14-exp1-liver_GCMRM_80.D	(03/01/17 00:00:00)	Sa_BARNECIELA-M2-j14-exp1-liver_80	gcliver1	139
BURKO-j3-exp2-liver_17	Sa_BURKO-M5-j3-exp2-liver_SF_17.d	(02/08/17 00:00:00)	Sa_BURKO-M5-j3-exp2-liver_SF_17	sfliver2	73	Sa_BURKO-M5-j3-exp2-liver_PA_17.d	(04/06/17 00:00:00)	Sa_BURKO-M5-j3-exp2-liver_PA_17	paliver2	246	Sa_BURKO-M5-j3-exp2-liver_BA_17.d	(01/30/17 00:00:00)	Sa_BURKO-M5-j3-exp2-liver_BA_17	baliver2	157	Sa_BURKO-M5-j3-exp2-liver_GCMRM_17.D	(03/10/17 00:00:00)	Sa_BURKO-M5-j3-exp2-liver_17	gcliver2	245
BARNECIELA-j14-exp1-liver_83	Sa_BARNECIELA-M5-j14-exp1-liver_SF_83.d	(02/14/17 00:00:00)	Sa_BARNECIELA-M5-j14-exp1-liver_SF_83	sfliver1	216	Sa_BARNECIELA-M5-j14-exp1-liver_PA_83.d	(03/31/17 00:00:00)	Sa_BARNECIELA-M5-j14-exp1-liver_PA_83	paliver1	139	Sa_BARNECIELA-M5-j14-exp1-liver_BA_83.d	(02/02/17 00:00:00)	Sa_BARNECIELA-M5-j14-exp1-liver_BA_83	baliver1	228	Sa_BARNECIELA-M5-j14-exp1-liver_GCMRM_83.D	(03/01/17 00:00:00)	Sa_BARNECIELA-M5-j14-exp1-liver_83	gcliver1	140
MITSUAKI-j14-exp2-liver_66	Sa_MITSUAKI-M6-j14-exp2-liver_SF_66.d	(02/08/17 00:00:00)	Sa_MITSUAKI-M6-j14-exp2-liver_SF_66	sfliver2	74	Sa_MITSUAKI-M6-j14-exp2-liver_PA_66.d	(04/06/17 00:00:00)	Sa_MITSUAKI-M6-j14-exp2-liver_PA_66	paliver2	247	Sa_MITSUAKI-M6-j14-exp2-liver_BA_66.d	(01/30/17 00:00:00)	Sa_MITSUAKI-M6-j14-exp2-liver_BA_66	baliver2	159	Sa_MITSUAKI-M6-j14-exp2-liver_GCMRM_66.D	(03/10/17 00:00:00)	Sa_MITSUAKI-M6-j14-exp2-liver_66	gcliver2	246
ATB-j3-exp1-liver_10	Sa_ATB-M4-j3-exp1-liver_SF_10.d	(02/14/17 00:00:00)	Sa_ATB-M4-j3-exp1-liver_SF_10	sfliver1	218	Sa_ATB-M4-j3-exp1-liver_PA_10.d	(03/31/17 00:00:00)	Sa_ATB-M4-j3-exp1-liver_PA_10	paliver1	140	Sa_ATB-M4-j3-exp1-liver_BA_10.d	(02/02/17 00:00:00)	Sa_ATB-M4-j3-exp1-liver_BA_10	baliver1	229	Sa_ATB-M4-j3-exp1-liver_GCMRM_10.D	(03/01/17 00:00:00)	Sa_ATB-M4-j3-exp1-liver_10	gcliver1	141
HIRAE-j3-exp1-liver_14	Sa_HIRAE-M2-j3-exp1-liver_SF_14.d	(02/17/17 00:00:00)	Sa_HIRAE-M2-j3-exp1-liver_SF_14	sfliver1	219	Sa_HIRAE-M2-j3-exp1-liver_PA_14.d	(03/31/17 00:00:00)	Sa_HIRAE-M2-j3-exp1-liver_PA_14	paliver1	141	Sa_HIRAE-M2-j3-exp1-liver_BA_14.d	(02/02/17 00:00:00)	Sa_HIRAE-M2-j3-exp1-liver_BA_14	baliver1	230	Sa_HIRAE-M2-j3-exp1-liver_GCMRM_14.D	(03/01/17 00:00:00)	Sa_HIRAE-M2-j3-exp1-liver_14	gcliver1	142
FRAGILIS-j14-exp1-liver_77	Sa_FRAGILIS-M5-j14-exp1-liver_SF_77.d	(02/17/17 00:00:00)	Sa_FRAGILIS-M5-j14-exp1-liver_SF_77	sfliver1	220	Sa_FRAGILIS-M5-j14-exp1-liver_PA_77.d	(03/31/17 00:00:00)	Sa_FRAGILIS-M5-j14-exp1-liver_PA_77	paliver1	142	Sa_FRAGILIS-M5-j14-exp1-liver_BA_77.d	(02/02/17 00:00:00)	Sa_FRAGILIS-M5-j14-exp1-liver_BA_77	baliver1	231	Sa_FRAGILIS-M5-j14-exp1-liver_GCMRM_77.D	(03/01/17 00:00:00)	Sa_FRAGILIS-M5-j14-exp1-liver_77	gcliver1	143
ATB-j7-exp1-liver_40	Sa_ATB-M4-j7-exp1-liver_SF_40.d	(02/17/17 00:00:00)	Sa_ATB-M4-j7-exp1-liver_SF_40	sfliver1	222	Sa_ATB-M4-j7-exp1-liver_PA_40.d	(03/31/17 00:00:00)	Sa_ATB-M4-j7-exp1-liver_PA_40	paliver1	144	Sa_ATB-M4-j7-exp1-liver_BA_40.d	(02/02/17 00:00:00)	Sa_ATB-M4-j7-exp1-liver_BA_40	baliver1	233	Sa_ATB-M4-j7-exp1-liver_GCMRM_40.D	(03/01/17 00:00:00)	Sa_ATB-M4-j7-exp1-liver_40	gcliver1	145
Nacl-j3-exp1-liver_6	Sa_Nacl-M6-j3-exp1-liver_SF_6.d	(02/17/17 00:00:00)	Sa_Nacl-M6-j3-exp1-liver_SF_6	sfliver1	223	Sa_Nacl-M6-j3-exp1-liver_PA_6.d	(03/31/17 00:00:00)	Sa_Nacl-M6-j3-exp1-liver_PA_6	paliver1	145	Sa_Nacl-M6-j3-exp1-liver_BA_6.d	(02/02/17 00:00:00)	Sa_Nacl-M6-j3-exp1-liver_BA_6	baliver1	234	Sa_Nacl-M6-j3-exp1-liver_GCMRM_6.D	(03/01/17 00:00:00)	Sa_Nacl-M6-j3-exp1-liver_6	gcliver1	146
ATB-j7-exp1-liver_42	Sa_ATB-M6-j7-exp1-liver_SF_42.d	(02/17/17 00:00:00)	Sa_ATB-M6-j7-exp1-liver_SF_42	sfliver1	224	Sa_ATB-M6-j7-exp1-liver_PA_42.d	(03/31/17 00:00:00)	Sa_ATB-M6-j7-exp1-liver_PA_42	paliver1	146	Sa_ATB-M6-j7-exp1-liver_BA_42.d	(02/02/17 00:00:00)	Sa_ATB-M6-j7-exp1-liver_BA_42	baliver1	235	Sa_ATB-M6-j7-exp1-liver_GCMRM_42.D	(03/01/17 00:00:00)	Sa_ATB-M6-j7-exp1-liver_42	gcliver1	147
HIRAE-j14-exp1-liver_68	Sa_HIRAE-M2-j14-exp1-liver_SF_68.d	(02/17/17 00:00:00)	Sa_HIRAE-M2-j14-exp1-liver_SF_68	sfliver1	225	Sa_HIRAE-M2-j14-exp1-liver_PA_68.d	(03/31/17 00:00:00)	Sa_HIRAE-M2-j14-exp1-liver_PA_68	paliver1	147	Sa_HIRAE-M2-j14-exp1-liver_BA_68.d	(02/02/17 00:00:00)	Sa_HIRAE-M2-j14-exp1-liver_BA_68	baliver1	236	Sa_HIRAE-M2-j14-exp1-liver_GCMRM_68.D	(03/01/17 00:00:00)	Sa_HIRAE-M2-j14-exp1-liver_68	gcliver1	148
ATB-j3-exp1-liver_8	Sa_ATB-M2-j3-exp1-liver_SF_8.d	(02/17/17 00:00:00)	Sa_ATB-M2-j3-exp1-liver_SF_8	sfliver1	226	Sa_ATB-M2-j3-exp1-liver_PA_8.d	(03/31/17 00:00:00)	Sa_ATB-M2-j3-exp1-liver_PA_8	paliver1	148	Sa_ATB-M2-j3-exp1-liver_BA_8.d	(02/02/17 00:00:00)	Sa_ATB-M2-j3-exp1-liver_BA_8	baliver1	237	Sa_ATB-M2-j3-exp1-liver_GCMRM_8.D	(03/01/17 00:00:00)	Sa_ATB-M2-j3-exp1-liver_8	gcliver1	149
HIRAE-j7-exp1-liver_44	Sa_HIRAE-M2-j7-exp1-liver_SF_44.d	(02/17/17 00:00:00)	Sa_HIRAE-M2-j7-exp1-liver_SF_44	sfliver1	227	Sa_HIRAE-M2-j7-exp1-liver_PA_44.d	(03/31/17 00:00:00)	Sa_HIRAE-M2-j7-exp1-liver_PA_44	paliver1	149	Sa_HIRAE-M2-j7-exp1-liver_BA_44.d	(02/02/17 00:00:00)	Sa_HIRAE-M2-j7-exp1-liver_BA_44	baliver1	238	Sa_HIRAE-M2-j7-exp1-liver_GCMRM_44.D	(03/01/17 00:00:00)	Sa_HIRAE-M2-j7-exp1-liver_44	gcliver1	150
FRAGILIS-j3-exp1-liver_20	Sa_FRAGILIS-M2-j3-exp1-liver_SF_20.d	(02/17/17 00:00:00)	Sa_FRAGILIS-M2-j3-exp1-liver_SF_20	sfliver1	228	Sa_FRAGILIS-M2-j3-exp1-liver_PA_20.d	(03/31/17 00:00:00)	Sa_FRAGILIS-M2-j3-exp1-liver_PA_20	paliver1	150	Sa_FRAGILIS-M2-j3-exp1-liver_BA_20.d	(02/02/17 00:00:00)	Sa_FRAGILIS-M2-j3-exp1-liver_BA_20	baliver1	239	Sa_FRAGILIS-M2-j3-exp1-liver_GCMRM_20.D	(03/01/17 00:00:00)	Sa_FRAGILIS-M2-j3-exp1-liver_20	gcliver1	151
BARNECIELA-j7-exp1-liver_56	Sa_BARNECIELA-M2-j7-exp1-liver_SF_56.d	(02/17/17 00:00:00)	Sa_BARNECIELA-M2-j7-exp1-liver_SF_56	sfliver1	229	Sa_BARNECIELA-M2-j7-exp1-liver_PA_56.d	(03/31/17 00:00:00)	Sa_BARNECIELA-M2-j7-exp1-liver_PA_56	paliver1	151	Sa_BARNECIELA-M2-j7-exp1-liver_BA_56.d	(02/02/17 00:00:00)	Sa_BARNECIELA-M2-j7-exp1-liver_BA_56	baliver1	240	Sa_BARNECIELA-M2-j7-exp1-liver_GCMRM_56.D	(03/01/17 00:00:00)	Sa_BARNECIELA-M2-j7-exp1-liver_56	gcliver1	152
Nacl-j7-exp1-liver_36	Sa_Nacl-M6-j7-exp1-liver_SF_36.d	(02/17/17 00:00:00)	Sa_Nacl-M6-j7-exp1-liver_SF_36	sfliver1	230	Sa_Nacl-M6-j7-exp1-liver_PA_36.d	(03/31/17 00:00:00)	Sa_Nacl-M6-j7-exp1-liver_PA_36	paliver1	152	Sa_Nacl-M6-j7-exp1-liver_BA_36.d	(02/02/17 00:00:00)	Sa_Nacl-M6-j7-exp1-liver_BA_36	baliver1	241	Sa_Nacl-M6-j7-exp1-liver_GCMRM_36.D	(03/01/17 00:00:00)	Sa_Nacl-M6-j7-exp1-liver_36	gcliver1	153
FRAGILIS-j3-exp1-liver_24	Sa_FRAGILIS-M6-j3-exp1-liver_SF_24.d	(02/17/17 00:00:00)	Sa_FRAGILIS-M6-j3-exp1-liver_SF_24	sfliver1	231	Sa_FRAGILIS-M6-j3-exp1-liver_PA_24.d	(03/31/17 00:00:00)	Sa_FRAGILIS-M6-j3-exp1-liver_PA_24	paliver1	153	Sa_FRAGILIS-M6-j3-exp1-liver_BA_24.d	(02/02/17 00:00:00)	Sa_FRAGILIS-M6-j3-exp1-liver_BA_24	baliver1	242	Sa_FRAGILIS-M6-j3-exp1-liver_GCMRM_24.D	(03/01/17 00:00:00)	Sa_FRAGILIS-M6-j3-exp1-liver_24	gcliver1	154
ATB-j14-exp1-liver_66	Sa_ATB-M6-j14-exp1-liver_SF_66.d	(02/17/17 00:00:00)	Sa_ATB-M6-j14-exp1-liver_SF_66	sfliver1	232	Sa_ATB-M6-j14-exp1-liver_PA_66.d	(03/31/17 00:00:00)	Sa_ATB-M6-j14-exp1-liver_PA_66	paliver1	154	Sa_ATB-M6-j14-exp1-liver_BA_66.d	(02/02/17 00:00:00)	Sa_ATB-M6-j14-exp1-liver_BA_66	baliver1	243	Sa_ATB-M6-j14-exp1-liver_GCMRM_66.D	(03/04/17 00:00:00)	Sa_ATB-M6-j14-exp1-liver_66	gcliver1	155
BARNECIELA-j14-exp1-liver_81	Sa_BARNECIELA-M3-j14-exp1-liver_SF_81.d	(02/17/17 00:00:00)	Sa_BARNECIELA-M3-j14-exp1-liver_SF_81	sfliver1	233	Sa_BARNECIELA-M3-j14-exp1-liver_PA_81.d	(03/31/17 00:00:00)	Sa_BARNECIELA-M3-j14-exp1-liver_PA_81	paliver1	156	Sa_BARNECIELA-M3-j14-exp1-liver_BA_81.d	(02/02/17 00:00:00)	Sa_BARNECIELA-M3-j14-exp1-liver_BA_81	baliver1	245	Sa_BARNECIELA-M3-j14-exp1-liver_GCMRM_81.D	(03/04/17 00:00:00)	Sa_BARNECIELA-M3-j14-exp1-liver_81	gcliver1	157
BARNECIELA-j3-exp1-liver_30	Sa_BARNECIELA-M6-j3-exp1-liver_SF_30.d	(02/17/17 00:00:00)	Sa_BARNECIELA-M6-j3-exp1-liver_SF_30	sfliver1	234	Sa_BARNECIELA-M6-j3-exp1-liver_PA_30.d	(03/31/17 00:00:00)	Sa_BARNECIELA-M6-j3-exp1-liver_PA_30	paliver1	157	Sa_BARNECIELA-M6-j3-exp1-liver_BA_30.d	(02/02/17 00:00:00)	Sa_BARNECIELA-M6-j3-exp1-liver_BA_30	baliver1	246	Sa_BARNECIELA-M6-j3-exp1-liver_GCMRM_30.D	(03/04/17 00:00:00)	Sa_BARNECIELA-M6-j3-exp1-liver_30	gcliver1	158
HIRAE-j7-exp1-liver_48	Sa_HIRAE-M6-j7-exp1-liver_SF_48b.d	(02/17/17 00:00:00)	Sa_HIRAE-M6-j7-exp1-liver_SF_48b	sfliver1	236	Sa_HIRAE-M6-j7-exp1-liver_PA_48.d	(03/31/17 00:00:00)	Sa_HIRAE-M6-j7-exp1-liver_PA_48	paliver1	158	Sa_HIRAE-M6-j7-exp1-liver_BA_48.d	(02/02/17 00:00:00)	Sa_HIRAE-M6-j7-exp1-liver_BA_48	baliver1	247	Sa_HIRAE-M6-j7-exp1-liver_GCMRM_48.D	(03/04/17 00:00:00)	Sa_HIRAE-M6-j7-exp1-liver_48	gcliver1	159
HIRAE-j3-exp1-liver_18	Sa_HIRAE-M6-j3-exp1-liver_SF_18.d	(02/17/17 00:00:00)	Sa_HIRAE-M6-j3-exp1-liver_SF_18	sfliver1	237	Sa_HIRAE-M6-j3-exp1-liver_PA_18.d	(03/31/17 00:00:00)	Sa_HIRAE-M6-j3-exp1-liver_PA_18	paliver1	159	Sa_HIRAE-M6-j3-exp1-liver_BA_18.d	(02/02/17 00:00:00)	Sa_HIRAE-M6-j3-exp1-liver_BA_18	baliver1	248	Sa_HIRAE-M6-j3-exp1-liver_GCMRM_18.D	(03/04/17 00:00:00)	Sa_HIRAE-M6-j3-exp1-liver_18	gcliver1	160
FRAGILIS-j14-exp1-liver_74	Sa_FRAGILIS-M2-j14-exp1-liver_SF_74.d	(02/17/17 00:00:00)	Sa_FRAGILIS-M2-j14-exp1-liver_SF_74	sfliver1	238	Sa_FRAGILIS-M2-j14-exp1-liver_PA_74.d	(03/31/17 00:00:00)	Sa_FRAGILIS-M2-j14-exp1-liver_PA_74	paliver1	160	Sa_FRAGILIS-M2-j14-exp1-liver_BA_74.d	(02/02/17 00:00:00)	Sa_FRAGILIS-M2-j14-exp1-liver_BA_74	baliver1	249	Sa_FRAGILIS-M2-j14-exp1-liver_GCMRM_74.D	(03/04/17 00:00:00)	Sa_FRAGILIS-M2-j14-exp1-liver_74	gcliver1	161
BARNECIELA-j3-exp1-liver_26	Sa_BARNECIELA-M2-j3-exp1-liver_SF_26.d	(02/17/17 00:00:00)	Sa_BARNECIELA-M2-j3-exp1-liver_SF_26	sfliver1	239	Sa_BARNECIELA-M2-j3-exp1-liver_PA_26.d	(03/31/17 00:00:00)	Sa_BARNECIELA-M2-j3-exp1-liver_PA_26	paliver1	161	Sa_BARNECIELA-M2-j3-exp1-liver_BA_26.d	(02/02/17 00:00:00)	Sa_BARNECIELA-M2-j3-exp1-liver_BA_26	baliver1	250	Sa_BARNECIELA-M2-j3-exp1-liver_GCMRM_26.D	(03/04/17 00:00:00)	Sa_BARNECIELA-M2-j3-exp1-liver_26	gcliver1	162
FRAGILIS-j7-exp1-liver_50	Sa_FRAGILIS-M2-j7-exp1-liver_SF_50.d	(02/14/17 00:00:00)	Sa_FRAGILIS-M2-j7-exp1-liver_SF_50	sfliver1	217	Sa_FRAGILIS-M2-j7-exp1-liver_PA_50b.d	(03/31/17 00:00:00)	Sa_FRAGILIS-M2-j7-exp1-liver_PA_50b	paliver1	171	Sa_FRAGILIS-M2-j7-exp1-liver_BA_50b.d	(02/02/17 00:00:00)	Sa_FRAGILIS-M2-j7-exp1-liver_BA_50b	baliver1	257	Sa_FRAGILIS-M2-j7-exp1-liver_GCMRM_50b.D	(03/04/17 00:00:00)	Sa_FRAGILIS-M2-j7-exp1-liver_50b	gcliver1	169
FRAGILIS-j7-exp1-liver_52	Sa_FRAGILIS-M4-j7-exp1-liver_SF_52.d	(02/17/17 00:00:00)	Sa_FRAGILIS-M4-j7-exp1-liver_SF_52	sfliver1	240	Sa_FRAGILIS-M4-j7-exp1-liver_PA_52.d	(03/31/17 00:00:00)	Sa_FRAGILIS-M4-j7-exp1-liver_PA_52	paliver1	162	Sa_FRAGILIS-M4-j7-exp1-liver_BA_52.d	(02/02/17 00:00:00)	Sa_FRAGILIS-M4-j7-exp1-liver_BA_52	baliver1	251	Sa_FRAGILIS-M4-j7-exp1-liver_GCMRM_52.D	(03/04/17 00:00:00)	Sa_FRAGILIS-M4-j7-exp1-liver_52	gcliver1	163
BARNECIELA-j7-exp1-liver_60	Sa_BARNECIELA-M6-j7-exp1-liver_SF_60.d	(02/17/17 00:00:00)	Sa_BARNECIELA-M6-j7-exp1-liver_SF_60	sfliver1	241	Sa_BARNECIELA-M6-j7-exp1-liver_PA_60.d	(03/31/17 00:00:00)	Sa_BARNECIELA-M6-j7-exp1-liver_PA_60	paliver1	163	Sa_BARNECIELA-M6-j7-exp1-liver_BA_60.d	(02/02/17 00:00:00)	Sa_BARNECIELA-M6-j7-exp1-liver_BA_60	baliver1	252	Sa_BARNECIELA-M6-j7-exp1-liver_GCMRM_60.D	(03/04/17 00:00:00)	Sa_BARNECIELA-M6-j7-exp1-liver_60	gcliver1	164
Nacl-j7-exp1-liver_32	Sa_Nacl-M2-j7-exp1-liver_SF_32.d	(02/17/17 00:00:00)	Sa_Nacl-M2-j7-exp1-liver_SF_32	sfliver1	242	Sa_Nacl-M2-j7-exp1-liver_PA_32b.d	(03/31/17 00:00:00)	Sa_Nacl-M2-j7-exp1-liver_PA_32b	paliver1	167	Sa_Nacl-M2-j7-exp1-liver_BA_32.d	(02/02/17 00:00:00)	Sa_Nacl-M2-j7-exp1-liver_BA_32	baliver1	253	Sa_Nacl-M2-j7-exp1-liver_GCMRM_32.D	(03/04/17 00:00:00)	Sa_Nacl-M2-j7-exp1-liver_32	gcliver1	165
BARNECIELA-j14-exp1-liver_82	Sa_BARNECIELA-M4-j14-exp1-liver_SF_82.d	(02/17/17 00:00:00)	Sa_BARNECIELA-M4-j14-exp1-liver_SF_82	sfliver1	243	Sa_BARNECIELA-M4-j14-exp1-liver_PA_82.d	(03/31/17 00:00:00)	Sa_BARNECIELA-M4-j14-exp1-liver_PA_82	paliver1	168	Sa_BARNECIELA-M4-j14-exp1-liver_BA_82.d	(02/02/17 00:00:00)	Sa_BARNECIELA-M4-j14-exp1-liver_BA_82	baliver1	254	Sa_BARNECIELA-M4-j14-exp1-liver_GCMRM_82.D	(03/04/17 00:00:00)	Sa_BARNECIELA-M4-j14-exp1-liver_82	gcliver1	166
ATB-j3-exp1-liver_12	Sa_ATB-M6-j3-exp1-liver_SF_12.d	(02/17/17 00:00:00)	Sa_ATB-M6-j3-exp1-liver_SF_12	sfliver1	244	Sa_ATB-M6-j3-exp1-liver_PA_12.d	(03/31/17 00:00:00)	Sa_ATB-M6-j3-exp1-liver_PA_12	paliver1	169	Sa_ATB-M6-j3-exp1-liver_BA_12.d	(02/02/17 00:00:00)	Sa_ATB-M6-j3-exp1-liver_BA_12	baliver1	255	Sa_ATB-M6-j3-exp1-liver_GCMRM_12.D	(03/04/17 00:00:00)	Sa_ATB-M6-j3-exp1-liver_12	gcliver1	167
HIRAE-j14-exp1-liver_70	Sa_HIRAE-M4-j14-exp1-liver_SF_70.d	(02/17/17 00:00:00)	Sa_HIRAE-M4-j14-exp1-liver_SF_70	sfliver1	245	Sa_HIRAE-M4-j14-exp1-liver_PA_70.d	(03/31/17 00:00:00)	Sa_HIRAE-M4-j14-exp1-liver_PA_70	paliver1	170	Sa_HIRAE-M4-j14-exp1-liver_BA_70.d	(02/02/17 00:00:00)	Sa_HIRAE-M4-j14-exp1-liver_BA_70	baliver1	256	Sa_HIRAE-M4-j14-exp1-liver_GCMRM_70.D	(03/04/17 00:00:00)	Sa_HIRAE-M4-j14-exp1-liver_70	gcliver1	168
St_SCFA-exp2-liver_pre	St_SCFA-exp2-liver_SF_2a.d	(02/05/17 00:00:00)	St_SCFA-exp2-liver_SF_2a	sfliver2	1	-	(NA NA)	-	-	-	-	(NA NA)	-	-	-	-	(NA NA)	-	-	-
St_PA-exp3-liver_pre	-	(NA NA)	-	-	-	St_PA-exp3-liver_PA_2a.d	(03/28/17 00:00:00)	St_PA-exp3-liver_PA_2a	paliver3	1	-	(NA NA)	-	-	-	-	(NA NA)	-	-	-
St_BA1-exp3-liver_pre	-	(NA NA)	-	-	-	-	(NA NA)	-	-	-	St_BA1-exp3-liver_BA_2a.d	(01/27/17 00:00:00)	St_BA1-exp3-liver_BA_2a	baliver3	1	-	(NA NA)	-	-	-
St_AA_exp3-liver_pre	-	(NA NA)	-	-	-	-	(NA NA)	-	-	-	-	(NA NA)	-	-	-	St_AA_exp3-liver_GCMRM_3a.D	(02/23/17 00:00:00)	St_AA_exp3-liver_3a	gcliver3	1
St_BA2-exp3-liver_pre	-	(NA NA)	-	-	-	-	(NA NA)	-	-	-	St_BA2-exp3-liver_BA_3a.d	(01/27/17 00:00:00)	St_BA2-exp3-liver_BA_3a	baliver3	2	-	(NA NA)	-	-	-
St_SCFA-exp2-liver_post	St_SCFA-exp2-liver_SF_2d.d	(02/08/17 00:00:00)	St_SCFA-exp2-liver_SF_2d	sfliver2	77	-	(NA NA)	-	-	-	-	(NA NA)	-	-	-	-	(NA NA)	-	-	-
St_PA-exp3-liver_post	-	(NA NA)	-	-	-	St_PA-exp3-liver_PA_2c.d	(03/28/17 00:00:00)	St_PA-exp3-liver_PA_2c	paliver3	77	-	(NA NA)	-	-	-	-	(NA NA)	-	-	-
St_SCFA-exp3-liver_pre	St_SCFA-exp3-liver_SF_2a.d	(02/08/17 00:00:00)	St_SCFA-exp3-liver_SF_2a	sfliver3	78	-	(NA NA)	-	-	-	-	(NA NA)	-	-	-	-	(NA NA)	-	-	-
St_PA-exp1-liver_pre	-	(NA NA)	-	-	-	St_PA-exp1-liver_PA_2a.d	(03/28/17 00:00:00)	St_PA-exp1-liver_PA_2a	paliver1	78	-	(NA NA)	-	-	-	-	(NA NA)	-	-	-
St_AA_exp3-liver_post	-	(NA NA)	-	-	-	-	(NA NA)	-	-	-	-	(NA NA)	-	-	-	St_AA_exp3-liver_GCMRM_3b.D	(02/26/17 00:00:00)	St_AA_exp3-liver_3b	gcliver3	78
St_AA-exp1-liver_pre	-	(NA NA)	-	-	-	-	(NA NA)	-	-	-	-	(NA NA)	-	-	-	St_AA-exp1-liver_GCMRM_3a.D	(03/01/17 00:00:00)	St_AA-exp1-liver_3a	gcliver1	79
St_BA2-exp3-liver_post	-	(NA NA)	-	-	-	-	(NA NA)	-	-	-	St_BA2-exp3-liver_BA_3b.d	(01/27/17 00:00:00)	St_BA2-exp3-liver_BA_3b	baliver3	82	-	(NA NA)	-	-	-
St_BA1-exp3-liver_post	-	(NA NA)	-	-	-	-	(NA NA)	-	-	-	St_BA1-exp3-liver_BA_2b.d	(01/27/17 00:00:00)	St_BA1-exp3-liver_BA_2b	baliver3	83	-	(NA NA)	-	-	-
St_BA1-exp2-liver_pre	-	(NA NA)	-	-	-	-	(NA NA)	-	-	-	St_BA1-exp2-liver_BA_2a.d	(01/30/17 00:00:00)	St_BA1-exp2-liver_BA_2a	baliver2	84	-	(NA NA)	-	-	-
St_BA2-exp2-liver_pre	-	(NA NA)	-	-	-	-	(NA NA)	-	-	-	St_BA2-exp2-liver_BA_3a.d	(01/30/17 00:00:00)	St_BA2-exp2-liver_BA_3a	baliver2	85	-	(NA NA)	-	-	-
St_SCFA-exp3-liver_post	St_SCFA-exp3-liver_SF_2d.d	(02/11/17 00:00:00)	St_SCFA-exp3-liver_SF_2d	sfliver3	154	-	(NA NA)	-	-	-	-	(NA NA)	-	-	-	-	(NA NA)	-	-	-
St_SCFA-exp1-liver_pre	St_SCFA1-exp1-liver_SF_3a.d	(02/14/17 00:00:00)	St_SCFA1-exp1-liver_SF_3a	sfliver1	155	-	(NA NA)	-	-	-	-	(NA NA)	-	-	-	-	(NA NA)	-	-	-
St_BA2-exp2-liver_post	-	(NA NA)	-	-	-	-	(NA NA)	-	-	-	St_BA2-exp2-liver_BA_3b.d	(01/30/17 00:00:00)	St_BA2-exp2-liver_BA_3b	baliver2	163	-	(NA NA)	-	-	-
St_BA1-exp2-liver_post	-	(NA NA)	-	-	-	-	(NA NA)	-	-	-	St_BA1-exp2-liver_BA_2b.d	(01/30/17 00:00:00)	St_BA1-exp2-liver_BA_2b	baliver2	164	-	(NA NA)	-	-	-
St_BA1-exp1-liver_pre	-	(NA NA)	-	-	-	-	(NA NA)	-	-	-	St_BA1-exp1-liver_BA_2a.d	(02/02/17 00:00:00)	St_BA1-exp1-liver_BA_2a	baliver1	165	-	(NA NA)	-	-	-
St_BA2-exp1-liver_pre	-	(NA NA)	-	-	-	-	(NA NA)	-	-	-	St_BA2-exp1-liver_BA_3a.d	(02/02/17 00:00:00)	St_BA2-exp1-liver_BA_3a	baliver1	166	-	(NA NA)	-	-	-
St_AA-exp1-liver_post	-	(NA NA)	-	-	-	-	(NA NA)	-	-	-	-	(NA NA)	-	-	-	St_AA-exp1-liver_GCMRM_3b.D	(03/04/17 00:00:00)	St_AA-exp1-liver_3b	gcliver1	173
St_PA-exp1-liver_post	-	(NA NA)	-	-	-	St_PA-exp1-liver_PA_2c.d	(03/31/17 00:00:00)	St_PA-exp1-liver_PA_2c	paliver1	174	-	(NA NA)	-	-	-	-	(NA NA)	-	-	-
St_AA_exp2-liver_pre	-	(NA NA)	-	-	-	-	(NA NA)	-	-	-	-	(NA NA)	-	-	-	St_AA_exp2-liver_GCMRM_3a.D	(03/07/17 00:00:00)	St_AA_exp2-liver_3a	gcliver2	174
St_PA-exp2-liver_pre	-	(NA NA)	-	-	-	St_PA-exp2-liver_PA_2aa.d	(04/03/17 00:00:00)	St_PA-exp2-liver_PA_2aa	paliver2	175	-	(NA NA)	-	-	-	-	(NA NA)	-	-	-
St_SCFA-exp1-liver_post	St_SCFA-exp1-liver_SF_3b.d	(02/17/17 00:00:00)	St_SCFA-exp1-liver_SF_3b	sfliver1	249	-	(NA NA)	-	-	-	-	(NA NA)	-	-	-	-	(NA NA)	-	-	-
St_PA-exp2-liver_post	-	(NA NA)	-	-	-	St_PA-exp2-liver_PA_2c.d	(04/06/17 00:00:00)	St_PA-exp2-liver_PA_2c	paliver2	251	-	(NA NA)	-	-	-	-	(NA NA)	-	-	-
St_AA_exp2-liver_post	-	(NA NA)	-	-	-	-	(NA NA)	-	-	-	-	(NA NA)	-	-	-	St_AA_exp2-liver_GCMRM_3b.D	(03/10/17 00:00:00)	St_AA_exp2-liver_3b	gcliver2	251
St_BA2-exp1-liver_post	-	(NA NA)	-	-	-	-	(NA NA)	-	-	-	St_BA2-exp1-liver_BA_3b.d	(02/02/17 00:00:00)	St_BA2-exp1-liver_BA_3b	baliver1	261	-	(NA NA)	-	-	-
St_BA1-exp1-liver_post	-	(NA NA)	-	-	-	-	(NA NA)	-	-	-	St_BA1-exp1-liver_BA_2b.d	(02/02/17 00:00:00)	St_BA1-exp1-liver_BA_2b	baliver1	262	-	(NA NA)	-	-	-

## Sheet: VarInfos
Analyte	MetName	IsSTD	IsISO	RT	LevelAnnot	OriginalName	Class	MF	Mass	HMDB	KEGG	PC	Chebi	OGName	PCu	Method	SBR	myQC_CV_AreaQCCorr_2	myQC_Sum_SBR>5	myQC_Sum_Height>0	Analyte.sfliver1	Analyte.sfliver2	Analyte.sfliver3	Analyte.paliver1	Analyte.paliver2	Analyte.paliver3	Analyte.baliver1	Analyte.baliver2	Analyte.baliver3	Analyte.gcliver1	Analyte.gcliver2	Analyte.gcliver3
12-dehydrocholic acid@5.28-ba	12-dehydrocholic acid	FALSE	FALSE	5.28	1	12-dehydrocholic acid	Steroids	C24H38O5	406.272	HMDB00400	C01292	94235	-	12-dehydrocholic acid	94235	ba	10	21.042	7	10	-	-	-	-	-	-	12-dehydrocholic acid@5.28-ba	12-dehydrocholic acid@5.38-ba	12-dehydrocholic acid@5.21-ba	-	-	-
2-aminoadipic acid@15.22-gc	2-aminoadipic acid	FALSE	FALSE	15.224	1	2-aminoadipic_acid	Amino acids	C6H11NO4	161.069	HMDB00510	C00956	469;59366488;92136	chebiId:37023	2-aminoadipic acid	469	gc	100	10.173	9	9	-	-	-	-	-	-	-	-	-	2-aminoadipic acid@15.22-gc	2-aminoadipic acid@15.22-gc	2-aminoadipic acid@15.22-gc
2-hydroxybutyric acid@2.50-sf	2-hydroxybutyric acid	FALSE	FALSE	2.504	1	2-hydroxybutyric_acid	Organic acids	C4H8O3	104.047	HMDB00008	C05984	440864;11266	chebiId:1148;chebiId:50613	2-hydroxybutyric acid	11266	sf	100	1.572	9	9	2-hydroxybutyric acid@2.47-sf	2-hydroxybutyric acid@2.53-sf	2-hydroxybutyric acid@2.51-sf	-	-	-	-	-	-	-	-	-
2-hydroxyglutaric acid@12.99-gc	2-hydroxyglutaric acid	FALSE	FALSE	12.995	1	2-hydroxyglutaric_acid	Organic acids	C5H8O5	148.037	HMDB00606;HMDB59655	C02630;C01087	43	chebiId:17084	2-hydroxyglutaric acid	43	gc	559	5.34	9	9	-	-	-	-	-	-	-	-	-	2-hydroxyglutaric acid@12.99-gc	2-hydroxyglutaric acid@12.99-gc	2-hydroxyglutaric acid@12.99-gc
2-oxoglutaric acid@13.00-gc	2-oxoglutaric acid	FALSE	FALSE	12.999	1	2-oxoglutaric_acid	Organic acids	C5H6O5	146.022	HMDB00208	C00026	51	chebiId:30915	2-oxoglutaric acid	51	gc	100	5.657	9	9	-	-	-	-	-	-	-	-	-	2-oxoglutaric acid@13.00-gc	2-oxoglutaric acid@13.00-gc	2-oxoglutaric acid@13.00-gc
3-hydroxybutyric acid@1.66-sf	3-hydroxybutyric acid	FALSE	FALSE	1.659	1	3-hydroxybutyric_acid	Organic acids	C4H8O3	104.047	HMDB00357;HMDB00011	C01089	441;92135	chebiId:10983;chebiId:17066;chebiId:20067	3-hydroxybutyric acid	441	sf	100	1.689	9	9	3-hydroxybutyric acid@1.64-sf	3-hydroxybutyric acid@1.67-sf	3-hydroxybutyric acid@1.67-sf	-	-	-	-	-	-	-	-	-
3-hydroxyisovaleric acid@7.82-gc	3-hydroxyisovaleric acid	FALSE	FALSE	7.824	1	3-hydroxyisovaleric_acid	Fatty Acyls	C5H10O3	118.063	HMDB00754	-	69362	chebiId:37084	3-hydroxyisovaleric acid	69362	gc	2504	5.448	0	9	-	-	-	-	-	-	-	-	-	3-hydroxyisovaleric acid@7.82-gc	3-hydroxyisovaleric acid@7.83-gc	3-hydroxyisovaleric acid@7.82-gc
3-methylhistidine@16.86-gc	3-methylhistidine	FALSE	FALSE	16.865	1	3-methylhistidine	Amino acids	C7H11N3O2	169.085	HMDB00479	C01152	64969;565965	chebiId:27596	3-methylhistidine	565965	gc	100	25.06	9	9	-	-	-	-	-	-	-	-	-	3-methylhistidine@16.86-gc	3-methylhistidine@16.86-gc	3-methylhistidine@16.87-gc
4-hydroxymandelic acid@15.21-gc	4-hydroxymandelic acid	FALSE	FALSE	15.207	1	4-hydroxymandelic_acid	Unclassified	C8H8O4	168.042	HMDB00822	C11527	328	chebiId:16388	4-hydroxymandelic acid	328	gc	100	2.859	9	9	-	-	-	-	-	-	-	-	-	4-hydroxymandelic acid@15.21-gc	4-hydroxymandelic acid@15.21-gc	4-hydroxymandelic acid@15.21-gc
4-hydroxyproline@12.43-gc	4-hydroxyproline	FALSE	FALSE	12.425	1	4-hydroxyproline	Amino acids	C5H9NO3	131.058	HMDB00725	C01157	825;5810;5238478	chebiId:18095	4-hydroxyproline	5238478	gc	444	6.504	9	9	-	-	-	-	-	-	-	-	-	4-hydroxyproline@12.43-gc	4-hydroxyproline@12.43-gc	4-hydroxyproline@12.43-gc
5-aminovaleric acid@13.51-gc	5-aminovaleric acid	FALSE	FALSE	13.513	1	5-aminovaleric_acid	Amino acids	C5H11NO2	117.079	HMDB03355	C00431	138;6992101	chebiId:15887	5-aminovaleric acid	138	gc	171	4.557	9	9	-	-	-	-	-	-	-	-	-	5-aminovaleric acid@13.51-gc	5-aminovaleric acid@13.51-gc	5-aminovaleric acid@13.51-gc
5-oxoproline@12.34-gc	5-oxoproline	FALSE	FALSE	12.343	1	5-oxoproline	Amino acids	C5H7NO3	129.043	HMDB00805;HMDB00267	C02237;C01879	439685;499;7405	chebiId:16010;chebiId:16924;chebiId:18183	5-oxoproline	499	gc	50799	5.285	9	9	-	-	-	-	-	-	-	-	-	5-oxoproline@12.34-gc	5-oxoproline@12.35-gc	5-oxoproline@12.34-gc
7,12-dihydroxy-3-oxocholanoic acid@7.06-ba	7,12-dihydroxy-3-oxocholanoic acid	FALSE	FALSE	7.059	1	3-dehydrocholic acid	Steroids	C24H38O5	406.272	-	-	5283956	-	Dehydrocholic acid	5283956	ba	10	62.153	9	10	-	-	-	-	-	-	7,12-dihydroxy-3-oxocholanoic acid@7.03-ba	7,12-dihydroxy-3-oxocholanoic acid@7.09-ba	7,12-dihydroxy-3-oxocholanoic acid@7.08-ba	-	-	-
Acetic acid@1.80-sf	Acetic acid	FALSE	FALSE	1.798	1	Acetic_acid	Organic acids	C2H4O2	60.021	HMDB00042	C00033	176;21980959	chebiId:15366	Acetic acid	176	sf	502	7.968	0	9	Acetic acid@1.77-sf	Acetic acid@1.80-sf	Acetic acid@1.80-sf	-	-	-	-	-	-	-	-	-
Adenine@16.17-gc	Adenine	FALSE	FALSE	16.173	1	Adenine	Bases	C5H5N5	135.054	HMDB00034	C00147	190	chebiId:16708	Adenine	190	gc	159	6.833	9	9	-	-	-	-	-	-	-	-	-	Adenine@16.17-gc	Adenine@16.17-gc	Adenine@16.17-gc
Alanine@6.92-gc	Alanine	FALSE	FALSE	6.915	1	Alanine	Amino acids	C3H7NO2	89.048	HMDB01310;HMDB00161	C00133;C00041	71080;602;5950;7311724;57383916	chebiId:15570;chebiId:16977	Alanine	57383916	gc	317194	4.732	9	9	-	-	-	-	-	-	-	-	-	Alanine@6.92-gc	Alanine@6.92-gc	Alanine@6.92-gc
Alpha-muricholic acid@5.88-ba	Alpha-muricholic acid	FALSE	FALSE	5.876	1	Alpha-muricholic acid	Steroids	C24H40O5	408.288	HMDB00506	C17647	5283852;3083761	chebiId:81243	Alpha-muricholic acid	3083761	ba	10	18.125	10	10	-	-	-	-	-	-	Alpha-muricholic acid@5.88-ba	Alpha-muricholic acid@5.99-ba	Alpha-muricholic acid@5.81-ba	-	-	-
Alpha-tocopherol@29.51-gc	Alpha-tocopherol	FALSE	FALSE	29.512	1	Alpha-tocopherol	Prenols	C29H50O2	430.381	HMDB01893	C02477	14985;2116	chebiId:18145	Alpha-tocopherol	2116	gc	100	3.947	9	9	-	-	-	-	-	-	-	-	-	Alpha-tocopherol@29.51-gc	Alpha-tocopherol@29.51-gc	Alpha-tocopherol@29.52-gc
Arabinose@14.16-gc	Arabinose	FALSE	FALSE	14.159	1	Arabinose	Carbohydrates	C5H10O5	150.053	HMDB00646	C00216;C00259	66308;6902;439195	chebiId:17108;chebiId:46994	Arabinose	439195	gc	130	7.407	9	9	-	-	-	-	-	-	-	-	-	Arabinose@14.16-gc	Arabinose@14.16-gc	Arabinose@14.16-gc
Arabitol@14.80-gc	Arabitol	FALSE	FALSE	14.804	1	Arabitol	Carbohydrates	C5H12O5	152.068	HMDB01851;HMDB00568	C00532;C01904	439255;94154	chebiId:18403;chebiId:18333	Arabitol	439255	gc	100	9.371	9	9	-	-	-	-	-	-	-	-	-	Arabitol@14.80-gc	Arabitol@14.80-gc	Arabitol@14.80-gc
Arachidonic acid@23.72-gc	Arachidonic acid	FALSE	FALSE	23.721	1	Arachidonic_acid	Fatty Acyls	C20H32O2	304.24	HMDB01043	C00219	444899;231	chebiId:15843	Arachidonic acid	231	gc	1647	17.9	9	9	-	-	-	-	-	-	-	-	-	Arachidonic acid@23.72-gc	Arachidonic acid@23.72-gc	Arachidonic acid@23.72-gc
Asparagine@14.11-gc	Asparagine	FALSE	FALSE	14.106	1	Asparagine	Amino acids	C4H8N2O3	132.053	HMDB00168	C00152	236;6267;5247114	chebiId:17196	Asparagine	236	gc	100	7.032	9	9	-	-	-	-	-	-	-	-	-	Asparagine@14.11-gc	Asparagine@14.11-gc	Asparagine@14.11-gc
Aspartic acid@12.36-gc	Aspartic acid	FALSE	FALSE	12.357	1	Aspartic_acid	Amino acids	C4H7NO4	133.038	HMDB06483;HMDB00191	C00402;C00049	83887;5960;424;23443619;57397078	chebiId:17364;chebiId:17053	Aspartic acid	23443619	gc	1375	6.406	9	9	-	-	-	-	-	-	-	-	-	Aspartic acid@12.36-gc	Aspartic acid@12.35-gc	Aspartic acid@12.36-gc
Behenic acid@26.39-gc	Behenic acid	FALSE	FALSE	26.391	1	Behenic_acid	Fatty Acyls	C22H44O2	340.334	HMDB00944	C08281	8215	chebiId:23858;chebiId:28941	Behenic acid	8215	gc	804	15.948	9	9	-	-	-	-	-	-	-	-	-	Behenic acid@26.39-gc	Behenic acid@26.39-gc	Behenic acid@26.39-gc
Benzoic acid@8.76-gc	Benzoic acid	FALSE	FALSE	8.763	1	Benzoic_acid	Unclassified	C7H6O2	122.037	HMDB01870	C00180	243;20144841	chebiId:30746	Benzoic acid	20144841	gc	483692	2.945	0	9	-	-	-	-	-	-	-	-	-	Benzoic acid@8.76-gc	Benzoic acid@8.77-gc	Benzoic acid@8.76-gc
Beta-alanine@11.15-gc	Beta-alanine	FALSE	FALSE	11.151	1	Beta-alanine	Amino acids	C3H7NO2	89.048	HMDB00056	C00099	239;4755801	chebiId:16958	Beta-alanine	239	gc	2142	7.665	9	9	-	-	-	-	-	-	-	-	-	Beta-alanine@11.15-gc	Beta-alanine@11.15-gc	Beta-alanine@11.15-gc
Beta-hydroxypyruvic acid@5.43-gc	Beta-hydroxypyruvic acid	FALSE	FALSE	5.432	1	Beta-hydroxypyruvic acid	Organic acids	C3H4O4	104.011	HMDB01352	C00168	964	chebiId:30841	Beta-hydroxypyruvic acid	964	gc	1986488	9.149	0	9	-	-	-	-	-	-	-	-	-	Beta-hydroxypyruvic acid@5.44-gc	Beta-hydroxypyruvic acid@5.43-gc	Beta-hydroxypyruvic acid@5.44-gc
Beta-muricholic acid@6.15-ba	Beta-muricholic acid	FALSE	FALSE	6.149	1	Beta-muricholic acid	Steroids	C24H40O5	408.288	HMDB00415	C17726	5283853;3083762	chebiId:81298	Beta-muricholic acid	3083762	ba	10	31.144	10	10	-	-	-	-	-	-	Beta-muricholic acid@6.15-ba	Beta-muricholic acid@6.26-ba	Beta-muricholic acid@6.07-ba	-	-	-
Butanoic acid@5.31-sf	Butanoic acid	FALSE	FALSE	5.307	1	Butanoic_acid	Fatty Acyls	C4H8O2	88.052	HMDB00039	C00246	264	chebiId:30772	Butanoic acid	264	sf	100	4.704	0	9	Butanoic acid@5.24-sf	Butanoic acid@5.36-sf	Butanoic acid@5.34-sf	-	-	-	-	-	-	-	-	-
Capric acid@11.44-gc	Capric acid	FALSE	FALSE	11.435	1	Capric_acid	Fatty Acyls	C10H20O2	172.146	HMDB00511	C01571	2969	chebiId:30813	Capric acid	2969	gc	164096	3.597	0	9	-	-	-	-	-	-	-	-	-	Capric acid@11.44-gc	Capric acid@11.44-gc	Capric acid@11.44-gc
Caprylic acid@8.95-gc	Caprylic acid	FALSE	FALSE	8.954	1	Caprylic_acid	Fatty Acyls	C8H16O2	144.115	HMDB00482	C06423	379	chebiId:28837	Caprylic acid	379	gc	183665	3.686	0	9	-	-	-	-	-	-	-	-	-	Caprylic acid@8.95-gc	Caprylic acid@8.95-gc	Caprylic acid@8.95-gc
Cholesterol@29.51-gc	Cholesterol	FALSE	FALSE	29.507	1	Cholesterol	Steroids	C27H46O	386.355	HMDB00067	C00187	6432564;5997	chebiId:16113	Cholesterol	5997	gc	197	1.349	9	9	-	-	-	-	-	-	-	-	-	Cholesterol@29.50-gc	Cholesterol@29.51-gc	Cholesterol@29.51-gc
Cholic acid@9.07-ba	Cholic acid	FALSE	FALSE	9.071	1	Cholic acid	Steroids	C24H40O5	408.288	HMDB00619	C00695;C01558	221493;303;439520	chebiId:16359;chebiId:22868;chebiId:3098	Cholic acid	303	ba	35	17.981	10	10	-	-	-	-	-	-	Cholic acid@9.07-ba	Cholic acid@9.13-ba	Cholic acid@9.01-ba	-	-	-
Citric acid;Isocitric acid@15.79-gc	Citric acid;Isocitric acid	FALSE	FALSE	15.79	1	Citric_acid__Isocitric_acid	Organic acids	C6H8O7	192.027	HMDB00094;HMDB00193	C00158;C00311	311;19782904;88113319;1198	chebiId:30769;chebiId:30887	Citric acid;Isocitric acid	19782904;1198	gc	5087	5.305	9	9	-	-	-	-	-	-	-	-	-	Citric acid;Isocitric acid@15.79-gc	Citric acid;Isocitric acid@15.79-gc	Citric acid;Isocitric acid@15.79-gc
Citrulline@15.76-gc	Citrulline	FALSE	FALSE	15.757	1	Citrulline	Amino acids	C6H13N3O3	175.096	HMDB00904	C00327	833;9750;25244873	chebiId:16349	Citrulline	25244873	gc	100	11.411	9	9	-	-	-	-	-	-	-	-	-	Citrulline@15.76-gc	Citrulline@15.75-gc	Citrulline@15.76-gc
Creatine@12.79-gc	Creatine	FALSE	FALSE	12.786	1	Creatine	Amino acids	C4H9N3O2	131.069	HMDB00064	C00300	586	chebiId:16919	Creatine	586	gc	245	8.492	9	9	-	-	-	-	-	-	-	-	-	Creatine@12.79-gc	Creatine@12.78-gc	Creatine@12.79-gc
Cystine;Cysteine@22.97-gc	Cystine;Cysteine	FALSE	FALSE	22.968	1	Cystine__Cysteine	Amino acids	C3H7NO2S;C6H12N2O4S2	180.522	HMDB00574;HMDB03417;HMDB00192	C00097;C00793;C00491	5862;594;92851;5260155;67678	chebiId:17561;chebiId:16375;chebiId:16283	Cysteine;Cystine	5260155;67678	gc	204	12.826	9	9	-	-	-	-	-	-	-	-	-	Cystine;Cysteine@22.97-gc	Cystine;Cysteine@22.97-gc	Cystine;Cysteine@22.97-gc
Cytosine@12.37-gc	Cytosine	FALSE	FALSE	12.367	1	Cytosine	Bases	C4H5N3O	111.043	HMDB00630	C00380	597	chebiId:16040	Cytosine	597	gc	105	8.852	9	9	-	-	-	-	-	-	-	-	-	Cytosine@12.37-gc	Cytosine@12.37-gc	Cytosine@12.37-gc
Deoxycholic acid@10.46-ba	Deoxycholic acid	FALSE	FALSE	10.455	1	Deoxycholic acid	Steroids	C24H40O4	392.293	HMDB00626	C11171;C04483	222528;2987;23668196	chebiId:9177;chebiId:28834	Deoxycholic acid	2987	ba	31	16.573	2	10	-	-	-	-	-	-	Deoxycholic acid@10.46-ba	Deoxycholic acid@10.54-ba	Deoxycholic acid@10.41-ba	-	-	-
Dimethylglycine@5.43-gc	Dimethylglycine	FALSE	FALSE	5.435	1	Dimethylglycine	Amino acids	C4H9NO2	103.063	HMDB00092	C01026	673	chebiId:17724	Dimethylglycine	673	gc	4031411	7.304	0	9	-	-	-	-	-	-	-	-	-	Dimethylglycine@5.43-gc	Dimethylglycine@5.43-gc	Dimethylglycine@5.43-gc
Erythritol@12.29-gc	Erythritol	FALSE	FALSE	12.285	1	Erythritol	Carbohydrates	C4H10O4	122.058	HMDB02994	C00503	222285;8998	chebiId:17113;chebiId:48299	Erythritol	8998	gc	120	5.209	9	9	-	-	-	-	-	-	-	-	-	Erythritol@12.29-gc	Erythritol@12.29-gc	Erythritol@12.29-gc
Ferulic acid@19.16-gc	Ferulic acid	FALSE	FALSE	19.163	1	Ferulic_acid	Flavonoids	C10H10O4	194.058	HMDB00537;HMDB00954	C01494	445858;709	chebiId:17620	Ferulic acid	445858	gc	100	7.717	9	9	-	-	-	-	-	-	-	-	-	Ferulic acid@19.16-gc	Ferulic acid@19.16-gc	Ferulic acid@19.17-gc
Fructose@16.47-gc	Fructose	FALSE	FALSE	16.467	1	Fructose	Carbohydrates	C6H12O6	180.063	HMDB00660	C00095;C02336	5984;439163;439709	chebiId:15824;chebiId:37721;chebiId:28645	Fructose	439163	gc	3917	7.338	9	9	-	-	-	-	-	-	-	-	-	Fructose@16.47-gc	Fructose@16.46-gc	Fructose@16.47-gc
Fumaric acid@10.07-gc	Fumaric acid	FALSE	FALSE	10.066	1	Fumaric_acid	Organic acids	C4H4O4	116.011	HMDB00134	C00122	444972	chebiId:18012	Fumaric acid	444972	gc	7943	7.238	9	9	-	-	-	-	-	-	-	-	-	Fumaric acid@10.07-gc	Fumaric acid@10.07-gc	Fumaric acid@10.06-gc
GABA@12.43-gc	GABA	FALSE	FALSE	12.429	1	GABA	Amino acids	C4H9NO2	103.063	HMDB00112	C00334	119;6992099	chebiId:16865	GABA	119	gc	331	8.666	9	9	-	-	-	-	-	-	-	-	-	GABA@12.43-gc	GABA@12.43-gc	GABA@12.43-gc
Galactitol;Sorbitol;Mannitol@17.27-gc	Galactitol;Sorbitol;Mannitol	FALSE	FALSE	17.265	1	Galactitol__Sorbitol__Mannitol	Carbohydrates	C6H14O6	182.079	HMDB00107;HMDB00765;HMDB00247	C01697;C00392;C00794	11850;6251;5780	chebiId:16813;chebiId:16899;chebiId:17924	Galactitol;Mannitol;Sorbitol	11850;6251;5780	gc	296	6.932	9	9	-	-	-	-	-	-	-	-	-	Galactitol;Sorbitol;Mannitol@17.27-gc	Galactitol;Sorbitol;Mannitol@17.26-gc	Galactitol;Sorbitol;Mannitol@17.27-gc
Galactose;Glucose;Mannose@17.00-gc	Galactose;Glucose;Mannose	FALSE	FALSE	17.005	1	Galactose__Glucose__Mannose	Carbohydrates	C6H12O6	180.063	HMDB00143;HMDB33704;HMDB00122;HMDB03345;HMDB00516;HMDB00169	C00124;C01582;C00984;C01825;C00031;C00267;C00221;C00159	439357;6036;3037556;12003287;79025;5793;206;64689;161658;18950	chebiId:4139;chebiId:28061;chebiId:28260;chebiId:42905;chebiId:4167;chebiId:17925;chebiId:15903;chebiId:4208	Galactose;Glucose;Mannose	12003287;206;161658	gc	408	2.025	9	9	-	-	-	-	-	-	-	-	-	Galactose;Glucose;Mannose@17.00-gc	Galactose;Glucose;Mannose@17.01-gc	Galactose;Glucose;Mannose@17.00-gc
Glucose-6-phosphate;Fructose-6-phosphate@23.79-gc	Glucose-6-phosphate;Fructose-6-phosphate	FALSE	FALSE	23.794	1	Glucose-6-phosphate__Fructose-6-phosphate	Carbohydrates	C6H13O9P	260.03	HMDB00124;HMDB03971;HMDB01401;HMDB03498	C05345;C00085;C00668;C00092;C01172	69507;440641;439160;5958;208;439284;439427	chebiId:16084;chebiId:15946;chebiId:61553;chebiId:17665;chebiId:4170;chebiId:17719	Fructose-6-phosphate;Glucose-6-phosphate	439160;208	gc	100	6.054	9	9	-	-	-	-	-	-	-	-	-	Glucose-6-phosphate;Fructose-6-phosphate@23.79-gc	Glucose-6-phosphate;Fructose-6-phosphate@23.79-gc	Glucose-6-phosphate;Fructose-6-phosphate@23.79-gc
Glutamic acid@13.51-gc	Glutamic acid	FALSE	FALSE	13.512	1	Glutamic_acid	Amino acids	C5H9NO4	147.053	HMDB03339;HMDB00148	C00025;C00302;C00217	611;33032;57397101;23327	chebiId:16015;chebiId:15966;chebiId:18327	Glutamic acid	57397101	gc	2810	5.534	9	9	-	-	-	-	-	-	-	-	-	Glutamic acid@13.51-gc	Glutamic acid@13.51-gc	Glutamic acid@13.52-gc
Glutamine@15.22-gc	Glutamine	FALSE	FALSE	15.219	1	Glutamine	Amino acids	C5H10N2O3	146.069	HMDB00641;HMDB03423	C00064;C00819	5961;145815;25244553;738	chebiId:18050;chebiId:17061	Glutamine	25244553	gc	100	9.915	9	9	-	-	-	-	-	-	-	-	-	Glutamine@15.22-gc	Glutamine@15.21-gc	Glutamine@15.22-gc
Glyceric acid@9.96-gc	Glyceric acid	FALSE	FALSE	9.958	1	Glyceric_acid	Carbohydrates	C3H6O4	106.027	HMDB00139	C00258	752;439194	chebiId:32398	Glyceric acid	752	gc	5800	7.303	9	9	-	-	-	-	-	-	-	-	-	Glyceric acid@9.96-gc	Glyceric acid@9.96-gc	Glyceric acid@9.96-gc
Glycerol@9.21-gc	Glycerol	FALSE	FALSE	9.214	1	Glycerol	Carbohydrates	C3H8O3	92.047	HMDB00131	C00116	753	chebiId:17754	Glycerol	753	gc	379964	7.418	0	9	-	-	-	-	-	-	-	-	-	Glycerol@9.21-gc	Glycerol@9.21-gc	Glycerol@9.21-gc
Glycerol-3-phosphate@15.21-gc	Glycerol-3-phosphate	FALSE	FALSE	15.207	1	Glycerol-3-phosphate	Lipids	C3H9O6P	172.014	HMDB00126	C00093	754;439162	chebiId:15978	Glycerol-3-phosphate	754	gc	377	2.987	9	9	-	-	-	-	-	-	-	-	-	Glycerol-3-phosphate@15.21-gc	Glycerol-3-phosphate@15.20-gc	Glycerol-3-phosphate@15.21-gc
Glycine@9.62-gc	Glycine	FALSE	FALSE	9.616	1	Glycine	Amino acids	C2H5NO2	75.032	HMDB00123	C00037	750;5257127	chebiId:15428	Glycine	5257127	gc	20480	7.81	9	9	-	-	-	-	-	-	-	-	-	Glycine@9.62-gc	Glycine@9.62-gc	Glycine@9.61-gc
Glycocholic acid@5.75-ba	Glycocholic acid	FALSE	FALSE	5.749	1	Glycocholic acid	Steroids	C26H43NO6	465.309	HMDB00138	C01921	10140;23617285;755	chebiId:17687	Glycocholic acid	755	ba	40	15.912	0	10	-	-	-	-	-	-	Glycocholic acid@5.75-ba	Glycocholic acid@5.86-ba	Glycocholic acid@5.67-ba	-	-	-
Guanine@19.91-gc	Guanine	FALSE	FALSE	19.915	1	Guanine	Bases	C5H5N5O	151.049	HMDB00132	C00242	764	chebiId:16235	Guanine	764	gc	100	16.997	9	9	-	-	-	-	-	-	-	-	-	Guanine@19.91-gc	Guanine@19.92-gc	Guanine@19.92-gc
Guanosine@27.44-gc	Guanosine	FALSE	FALSE	27.436	1	Guanosine	Nucleosides	C10H13N5O5	283.092	HMDB00133	C00387	6802;765	chebiId:16750	Guanosine	765	gc	6440	3.742	9	9	-	-	-	-	-	-	-	-	-	Guanosine@27.44-gc	Guanosine@27.43-gc	Guanosine@27.44-gc
Hippuric acid@15.78-gc	Hippuric acid	FALSE	FALSE	15.783	1	Hippuric_acid	Unclassified	C9H9NO3	179.058	HMDB00714	C01586	464	chebiId:18089	Hippuric acid	464	gc	9024	5.521	9	9	-	-	-	-	-	-	-	-	-	Hippuric acid@15.78-gc	Hippuric acid@15.78-gc	Hippuric acid@15.78-gc
Homoserine@10.35-gc	Homoserine	FALSE	FALSE	10.345	1	Homoserine	Amino acids	C4H9NO3	119.058	HMDB00719	C00263	12647;1502076;779;25245858;193314	chebiId:15699	Homoserine	193314	gc	7497	11.187	9	9	-	-	-	-	-	-	-	-	-	Homoserine@10.34-gc	Homoserine@10.35-gc	Homoserine@10.34-gc
Hypotaurine@13.27-gc	Hypotaurine	FALSE	FALSE	13.274	1	Hypotaurine	Organic acids	C2H7NO2S	109.02	HMDB00965	C00519	107812;25244088	chebiId:16668	Hypotaurine	107812	gc	100	10.722	9	9	-	-	-	-	-	-	-	-	-	Hypotaurine@13.27-gc	Hypotaurine@13.27-gc	Hypotaurine@13.28-gc
Hypoxanthine@15.54-gc	Hypoxanthine	FALSE	FALSE	15.537	1	Hypoxanthine	Bases	C5H4N4O	136.039	HMDB00157	C00262	790	chebiId:17368	Hypoxanthine	790	gc	100	5.57	9	9	-	-	-	-	-	-	-	-	-	Hypoxanthine@15.54-gc	Hypoxanthine@15.54-gc	Hypoxanthine@15.54-gc
Indole-3-acrylic acid@9.67-pa	Indole-3-acrylic acid	FALSE	FALSE	9.667	1	Indole-3-acrylic_acid	Indoles	C11H9NO2	187.063	HMDB00734	-	15030923	-	Indole-3-acrylic acid	15030923	pa	10	21.564	11	11	-	-	-	Indole-3-acrylic acid@9.67-pa	Indole-3-acrylic acid@9.65-pa	Indole-3-acrylic acid@9.67-pa	-	-	-	-	-	-
Inosine@24.87-gc	Inosine	FALSE	FALSE	24.869	1	Inosine	Nucleosides	C10H12N4O5	268.081	HMDB00195	C00294	6021	chebiId:17596	Inosine	6021	gc	100	4.507	9	9	-	-	-	-	-	-	-	-	-	Inosine@24.87-gc	Inosine@24.86-gc	Inosine@24.87-gc
Inositol@19.60-gc	Inositol	FALSE	FALSE	19.597	1	Inositol	Unclassified	C6H12O6	180.063	HMDB06088;HMDB00211	C06153;C00137;C19891	892	chebiId:10642;chebiId:17268	Inositol	892	gc	4487	5.063	9	9	-	-	-	-	-	-	-	-	-	Inositol@19.60-gc	Inositol@19.59-gc	Inositol@19.60-gc
Isobutyric acid@4.93-sf	Isobutyric acid	FALSE	FALSE	4.927	1	Isobutyric_acid	Organic acids	C4H8O2	88.052	HMDB01873	C02632	6590	chebiId:16135	Isobutyric acid	6590	sf	262	13.677	0	9	Isobutyric acid@4.86-sf	Isobutyric acid@4.97-sf	Isobutyric acid@4.95-sf	-	-	-	-	-	-	-	-	-
Isoleucine@9.45-gc	Isoleucine	FALSE	FALSE	9.447	1	Isoleucine	Amino acids	C6H13NO2	131.095	HMDB00172	C00407	791;6306	chebiId:17191	Isoleucine	791	gc	11167	22.178	9	9	-	-	-	-	-	-	-	-	-	Isoleucine@9.45-gc	Isoleucine@9.45-gc	Isoleucine@9.44-gc
Ketoisocaproic acid@8.37-gc	Ketoisocaproic acid	FALSE	FALSE	8.372	1	Ketoisocaproic_acid	Organic acids	C6H10O3	130.063	HMDB00695	C00233	70	chebiId:48430	Ketoisocaproic acid	70	gc	100	23.18	0	9	-	-	-	-	-	-	-	-	-	Ketoisocaproic acid@8.37-gc	Ketoisocaproic acid@8.37-gc	Ketoisocaproic acid@8.37-gc
Ketoisovaleric acid@7.33-gc	Ketoisovaleric acid	FALSE	FALSE	7.331	1	Ketoisovaleric_acid	Organic acids	C5H8O3	116.047	HMDB00019	C00141	49	chebiId:11851;chebiId:16530	Ketoisovaleric acid	49	gc	100	30.029	0	9	-	-	-	-	-	-	-	-	-	Ketoisovaleric acid@7.33-gc	Ketoisovaleric acid@7.33-gc	Ketoisovaleric acid@7.33-gc
Kynurenine@21.10-gc	Kynurenine	FALSE	FALSE	21.104	1	Kynurenine	Unclassified	C10H12N2O3	208.085	HMDB00684	C00328	846;161166;25245862	chebiId:16946	Kynurenine	25245862	gc	100	11.139	9	9	-	-	-	-	-	-	-	-	-	Kynurenine@21.10-gc	Kynurenine@21.10-gc	Kynurenine@21.11-gc
Lactic acid@6.39-gc	Lactic acid	FALSE	FALSE	6.395	1	Lactic_acid	Organic acids	C3H6O3	90.032	HMDB01311;HMDB00190	C00256;C00186	61503;107689;19789253;612	chebiId:341;chebiId:42111;chebiId:422	Lactic acid	19789253	gc	275060	3.225	9	9	-	-	-	-	-	-	-	-	-	Lactic acid@6.39-gc	Lactic acid@6.39-gc	Lactic acid@6.39-gc
Lactose@27.22-gc	Lactose	FALSE	FALSE	27.223	1	Lactose	Carbohydrates	C12H22O11	342.116	HMDB00186	C00243	84571;440995	chebiId:17716	Lactose	440995	gc	2446	9.421	9	9	-	-	-	-	-	-	-	-	-	Lactose@27.22-gc	Lactose@27.22-gc	Lactose@27.23-gc
Lauric acid@13.75-gc	Lauric acid	FALSE	FALSE	13.751	1	Lauric_acid	Fatty Acyls	C12H24O2	200.178	HMDB00638	C02679	3893	chebiId:30805	Lauric acid	3893	gc	39501	4.611	0	9	-	-	-	-	-	-	-	-	-	Lauric acid@13.75-gc	Lauric acid@13.75-gc	Lauric acid@13.75-gc
Leucine@9.15-gc	Leucine	FALSE	FALSE	9.15	1	Leucine	Amino acids	C6H13NO2	131.095	HMDB00687	C00123	6106;857;5255803	chebiId:15603	Leucine	5255803	gc	11523	18.819	9	9	-	-	-	-	-	-	-	-	-	Leucine@9.15-gc	Leucine@9.15-gc	Leucine@9.15-gc
Linoleic acid@21.19-gc	Linoleic acid	FALSE	FALSE	21.19	1	Linoleic_acid	Fatty Acyls	C18H32O2	280.24	HMDB00673	C01595	5280450;3931	chebiId:17351	Linoleic acid	3931	gc	13780	10.697	9	9	-	-	-	-	-	-	-	-	-	Linoleic acid@21.19-gc	Linoleic acid@21.18-gc	Linoleic acid@21.20-gc
Malic acid@11.97-gc	Malic acid	FALSE	FALSE	11.971	1	Malic_acid	Organic acids	C4H6O5	134.022	HMDB00156;HMDB00744	C00149;C00711	525;20130941;222656	chebiId:30797;chebiId:6650	Malic acid	20130941	gc	754	5.1	9	9	-	-	-	-	-	-	-	-	-	Malic acid@11.97-gc	Malic acid@11.97-gc	Malic acid@11.97-gc
Malonic acid@8.23-gc	Malonic acid	FALSE	FALSE	8.226	1	Malonic_acid	Organic acids	C3H4O4	104.011	HMDB00691	C00383	867;23511544	chebiId:30794	Malonic acid	23511544	gc	152	28.549	0	9	-	-	-	-	-	-	-	-	-	Malonic acid@8.23-gc	Malonic acid@8.23-gc	Malonic acid@8.22-gc
Maltose;Trehalose@27.56-gc	Maltose;Trehalose	FALSE	FALSE	27.564	1	Maltose__Trehalose	Carbohydrates	C12H22O11	342.116	HMDB00163;HMDB00975	C00208;C01083	439341;6255;439186;294;7427;1143	chebiId:17306;chebiId:16551	Maltose;Trehalose	294;1143	gc	627	6.161	9	9	-	-	-	-	-	-	-	-	-	Maltose;Trehalose@27.56-gc	Maltose;Trehalose@27.56-gc	Maltose;Trehalose@27.57-gc
Margaric acid@19.92-gc	Margaric acid	FALSE	FALSE	19.919	1	Margaric_acid	Fatty Acyls	C17H34O2	270.256	HMDB02259	-	10465	-	Margaric acid	10465	gc	15575	9.588	9	9	-	-	-	-	-	-	-	-	-	Margaric acid@19.92-gc	Margaric acid@19.91-gc	Margaric acid@19.92-gc
Methionine@12.30-gc	Methionine	FALSE	FALSE	12.303	1	Methionine	Amino acids	C5H11NO2S	149.051	HMDB00696	C00073	6137;876;5255805	chebiId:16643	Methionine	5255805	gc	540	3.203	9	9	-	-	-	-	-	-	-	-	-	Methionine@12.30-gc	Methionine@12.30-gc	Methionine@12.30-gc
Methylmalonic acid@8.40-gc	Methylmalonic acid	FALSE	FALSE	8.403	1	Methylmalonic_acid	Organic acids	C4H6O4	118.027	HMDB00202	C02170	487	chebiId:30860	Methylmalonic acid	487	gc	100	18.099	9	9	-	-	-	-	-	-	-	-	-	Methylmalonic acid@8.40-gc	Methylmalonic acid@8.40-gc	Methylmalonic acid@8.40-gc
Methylsuccinic acid@9.82-gc	Methylsuccinic acid	FALSE	FALSE	9.817	1	Methylsuccinic_acid	Fatty Acyls	C5H8O4	132.042	HMDB01844	-	10349	-	Methylsuccinic acid	10349	gc	856	6.25	9	9	-	-	-	-	-	-	-	-	-	Methylsuccinic acid@9.82-gc	Methylsuccinic acid@9.82-gc	Methylsuccinic acid@9.82-gc
Myristic acid@15.87-gc	Myristic acid	FALSE	FALSE	15.865	1	Myristic_acid	Fatty Acyls	C14H28O2	228.209	HMDB00806	C06424	11005	chebiId:28875;chebiId:30807	Myristic acid	11005	gc	322523	6.15	0	9	-	-	-	-	-	-	-	-	-	Myristic acid@15.87-gc	Myristic acid@15.86-gc	Myristic acid@15.87-gc
N-acetylputrescine@2.93-pa	N-acetylputrescine	FALSE	FALSE	2.933	1	N-acetylputrescine	Organic acids	C6H14N2O	130.111	HMDB02064	C02714	122356	chebiId:17768	N-acetylputrescine	122356	pa	10	54.038	7	11	-	-	-	N-acetylputrescine@2.97-pa	N-acetylputrescine@2.93-pa	N-acetylputrescine@2.89-pa	-	-	-	-	-	-
N-propylamine@5.83-gc	N-propylamine	FALSE	FALSE	5.825	1	N-propylamine	Unclassified	C3H9N	59.074	HMDB34006	-	7852	-	N-propylamine	7852	gc	21145	13.616	0	9	-	-	-	-	-	-	-	-	-	N-propylamine@5.83-gc	N-propylamine@5.82-gc	N-propylamine@5.83-gc
N1-acetylspermidine@5.33-pa	N1-acetylspermidine	FALSE	FALSE	5.327	1	N1-acetylspermidine	Amino acids	C9H21N3O	187.168	HMDB01276	C00612	496	chebiId:17927	N-acetylspermine	496	pa	10	13.402	11	11	-	-	-	N1-acetylspermidine@5.31-pa	N1-acetylspermidine@5.31-pa	N1-acetylspermidine@5.41-pa	-	-	-	-	-	-
N1-acetylspermine@6.71-pa	N1-acetylspermine	FALSE	FALSE	6.714	1	N-acetylspermine	Amino acids	C12H28N4O	244.226	HMDB01186	C02567	916	chebiId:17312	N-acetylspermine	916	pa	10	42.311	10	11	-	-	-	N1-acetylspermine@6.71-pa	N1-acetylspermine@6.71-pa	N1-acetylspermine@6.77-pa	-	-	-	-	-	-
N1,N12-diacetylspermine@5.72-pa	N1,N12-diacetylspermine	FALSE	FALSE	5.721	1	N1-N12-diacetylspermine	Amino acids	C14H30N4O2	286.237	HMDB02172;HMDB41876	C03413	132679;132680	chebiId:28101	N1,N12-diacetylspermine	132680	pa	10	91.256	0	11	-	-	-	N1,N12-diacetylspermine@5.71-pa	N1,N12-diacetylspermine@5.74-pa	N1,N12-diacetylspermine@5.74-pa	-	-	-	-	-	-
N1,N8-diacetylspermidine@4.35-pa	N1,N8-diacetylspermidine	FALSE	FALSE	4.346	1	N1-N8-diacetylspermidine	Amino acids	C11H23N3O2	229.179	HMDB41947	-	389613	-	N1,N8-diacetylspermidine	389613	pa	10	105.405	3	11	-	-	-	N1,N8-diacetylspermidine@4.33-pa	N1,N8-diacetylspermidine@4.32-pa	N1,N8-diacetylspermidine@4.41-pa	-	-	-	-	-	-
N8-acetylspermidine@5.46-pa	N8-acetylspermidine	FALSE	FALSE	5.464	1	N8-acetylspermidine	Amino acids	C9H21N3O	187.168	HMDB02189	C01029	123689	chebiId:27911	N-acetylspermidine	123689	pa	10	96.904	10	11	-	-	-	N8-acetylspermidine@5.46-pa	N8-acetylspermidine@5.45-pa	N8-acetylspermidine@5.48-pa	-	-	-	-	-	-
Niacinamide@11.74-gc	Niacinamide	FALSE	FALSE	11.744	1	Niacinamide	Unclassified	C6H6N2O	122.048	HMDB01406	C00153	936	chebiId:17154	Niacinamide	936	gc	568	4.329	9	9	-	-	-	-	-	-	-	-	-	Niacinamide@11.74-gc	Niacinamide@11.75-gc	Niacinamide@11.74-gc
Nicotinic acid@9.38-gc	Nicotinic acid	FALSE	FALSE	9.379	1	Nicotinic_acid	Unclassified	C6H5NO2	123.032	HMDB01488	C00253	938;117629482	chebiId:15940	Nicotinic acid	117629482	gc	1644	8.045	9	9	-	-	-	-	-	-	-	-	-	Nicotinic acid@9.38-gc	Nicotinic acid@9.38-gc	Nicotinic acid@9.38-gc
Nonanoic acid@10.21-gc	Nonanoic acid	FALSE	FALSE	10.212	1	Nonanoic_acid	Fatty Acyls	C9H18O2	158.131	HMDB00847	C01601	8158	chebiId:29019	Nonanoic acid	8158	gc	265825	2.847	0	9	-	-	-	-	-	-	-	-	-	Nonanoic acid@10.21-gc	Nonanoic acid@10.22-gc	Nonanoic acid@10.21-gc
O-phosphoethanolamine@15.39-gc	O-phosphoethanolamine	FALSE	FALSE	15.389	1	O-phosphoethanolamine	Organic acids	C2H8NO4P	141.019	HMDB00224	C00346	1015;5232324	chebiId:17553	O-phosphoethanolamine	1015	gc	775	15.792	9	9	-	-	-	-	-	-	-	-	-	O-phosphoethanolamine@15.39-gc	O-phosphoethanolamine@15.38-gc	O-phosphoethanolamine@15.39-gc
Oleic acid;Elaidic acid@21.31-gc	Oleic acid;Elaidic acid	FALSE	FALSE	21.307	1	Oleic_acid__Elaidic_acid	Fatty Acyls	C18H34O2	282.256	HMDB00573;HMDB00207	C01712;C00712	637517;445639	chebiId:27997;chebiId:16196	Oleic acid;Elaidic acid	637517;445639	gc	2790	31.825	9	9	-	-	-	-	-	-	-	-	-	Oleic acid;Elaidic acid@21.31-gc	Oleic acid;Elaidic acid@21.30-gc	Oleic acid;Elaidic acid@21.31-gc
Omega-muricholic acid@5.75-ba	Omega-muricholic acid	FALSE	FALSE	5.75	1	Omega-muricholic acid	Steroids	C24H40O5	408.288	HMDB00364	C17727	5283851	chebiId:81299	omega-muricholic acid	5283851	ba	18	10.319	10	10	-	-	-	-	-	-	Omega-muricholic acid@5.75-ba	Omega-muricholic acid@5.85-ba	Omega-muricholic acid@5.68-ba	-	-	-
Ornithine@2.17-pa	Ornithine	FALSE	FALSE	2.174	1	Ornithine	Amino acids	C5H12N2O2	132.09	HMDB03374;HMDB00214	C00077;C00515	6262;389;71082	chebiId:15729;chebiId:16176	Ornithine	389	pa	10	10.229	11	11	-	-	-	Ornithine@2.17-pa	Ornithine@2.17-pa	Ornithine@2.16-pa	-	-	-	-	-	-
Palmitic acid@18.27-gc	Palmitic acid	FALSE	FALSE	18.269	1	Palmitic_acid	Fatty Acyls	C16H32O2	256.24	HMDB00220	C00249	985	chebiId:15756	Palmitic acid	985	gc	719372	7.317	9	9	-	-	-	-	-	-	-	-	-	Palmitic acid@18.27-gc	Palmitic acid@18.26-gc	Palmitic acid@18.27-gc
Palmitoleic acid@17.97-gc	Palmitoleic acid	FALSE	FALSE	17.973	1	Palmitoleic_acid	Fatty Acyls	C16H30O2	254.225	HMDB03229	C08362	445638;4668	chebiId:28716	Palmitoleic acid	445638	gc	2350	7.057	9	9	-	-	-	-	-	-	-	-	-	Palmitoleic acid@17.97-gc	Palmitoleic acid@17.97-gc	Palmitoleic acid@17.98-gc
Pantothenic acid@17.78-gc	Pantothenic acid	FALSE	FALSE	17.784	1	Pantothenic_acid	Amino acids	C9H17NO5	219.111	HMDB00210	C00864	6613;988	chebiId:29032;chebiId:46905;chebiId:7916	Pantothenic acid	988	gc	100	7.054	9	9	-	-	-	-	-	-	-	-	-	Pantothenic acid@17.78-gc	Pantothenic acid@17.78-gc	Pantothenic acid@17.79-gc
Phenylalanine@13.58-gc	Phenylalanine	FALSE	FALSE	13.584	1	Phenylalanine	Amino acids	C9H11NO2	165.079	HMDB00159	C00079	6140;994;57397115	chebiId:17295	Phenylalanine	57397115	gc	1383	5.617	9	9	-	-	-	-	-	-	-	-	-	Phenylalanine@13.58-gc	Phenylalanine@13.58-gc	Phenylalanine@13.59-gc
Phenylbutyric acid@12.40-gc	Phenylbutyric acid	FALSE	FALSE	12.402	1	Phenylbutyric_acid	Unclassified	C10H12O2	164.084	HMDB00329;HMDB01955;HMDB00543	-	4775	-	Phenylbutyric acid	4775	gc	1326	6.952	9	9	-	-	-	-	-	-	-	-	-	Phenylbutyric acid@12.40-gc	Phenylbutyric acid@12.41-gc	Phenylbutyric acid@12.40-gc
Phosphoenolpyruvic acid@13.34-gc	Phosphoenolpyruvic acid	FALSE	FALSE	13.335	1	Phosphoenolpyruvic_acid	Organic acids	C3H5O6P	167.982	HMDB00263	C00074	1005	chebiId:18021;chebiId:44897	Phosphoenolpyruvic acid	1005	gc	100	8.624	9	9	-	-	-	-	-	-	-	-	-	Phosphoenolpyruvic acid@13.34-gc	Phosphoenolpyruvic acid@13.34-gc	Phosphoenolpyruvic acid@13.34-gc
Phosphoric acid@9.22-gc	Phosphoric acid	FALSE	FALSE	9.217	1	Phosphoric_acid	Unclassified	H3O4P	97.977	HMDB01429;HMDB02142	C00009	1004	chebiId:18367;chebiId:26078	Phosphoric acid	1004	gc	146648	1.735	9	9	-	-	-	-	-	-	-	-	-	Phosphoric acid@9.21-gc	Phosphoric acid@9.22-gc	Phosphoric acid@9.22-gc
Proline@9.48-gc	Proline	FALSE	FALSE	9.481	1	Proline	Amino acids	C5H9NO2	115.063	HMDB03411;HMDB00162	C00763;C00148	8988;145742;25246272;614	chebiId:16313;chebiId:17203	Proline	25246272	gc	3788	24.779	9	9	-	-	-	-	-	-	-	-	-	Proline@9.48-gc	Proline@9.49-gc	Proline@9.48-gc
Propionic acid@2.89-sf	Propionic acid	FALSE	FALSE	2.893	1	Propionic_acid	Organic acids	C3H6O2	74.037	HMDB00237	C00163	1032	chebiId:30768	Propionic acid	1032	sf	332	13.827	0	9	Propionic acid@2.85-sf	Propionic acid@2.92-sf	Propionic acid@2.90-sf	-	-	-	-	-	-	-	-	-
Putrescine@5.03-pa	Putrescine	FALSE	FALSE	5.029	1	Putrescine	Unclassified	C4H12N2	88.1	HMDB01414	C00134	1045	chebiId:17148	Putrescine	1045	pa	10	121.338	9	11	-	-	-	Putrescine@5.04-pa	Putrescine@5.06-pa	Putrescine@4.99-pa	-	-	-	-	-	-
Pyruvic acid;Oxaloacetic acid@6.26-gc	Pyruvic acid;Oxaloacetic acid	FALSE	FALSE	6.259	1	Pyruvic acid__Oxaloacetic acid	Organic acids	C4H4O5;C3H4O3	110.011	HMDB00223;HMDB00243	C00036;C00022	970;1060	chebiId:30744;chebiId:32816	Oxaloacetic acid;Pyruvic acid	970;1060	gc	5834	8.279	9	9	-	-	-	-	-	-	-	-	-	Pyruvic acid;Oxaloacetic acid@6.26-gc	Pyruvic acid;Oxaloacetic acid@6.26-gc	Pyruvic acid;Oxaloacetic acid@6.26-gc
Raffinose@31.27-gc	Raffinose	FALSE	FALSE	31.267	1	Raffinose	Carbohydrates	C18H32O16	504.169	HMDB03213	C00492	10542;219993;439242	chebiId:16634	Raffinose	219993	gc	401	13.186	9	9	-	-	-	-	-	-	-	-	-	Raffinose@31.27-gc	Raffinose@31.26-gc	Raffinose@31.27-gc
Ribitol@14.85-gc	Ribitol	FALSE	FALSE	14.854	1	Ribitol	Carbohydrates	C5H12O5	152.068	HMDB00508	C00474	827	chebiId:15963	Ribitol	827	gc	100	8.36	9	9	-	-	-	-	-	-	-	-	-	Ribitol@14.85-gc	Ribitol@14.85-gc	Ribitol@14.86-gc
Ribose-5-phosphate@20.06-gc	Ribose-5-phosphate	FALSE	FALSE	20.056	1	Ribose-5-phosphate	Carbohydrates	C5H11O8P	230.019	HMDB01548	C00117	439167	chebiId:17797;chebiId:52742	Ribose-5-phosphate	439167	gc	109	5.635	9	9	-	-	-	-	-	-	-	-	-	Ribose-5-phosphate@20.06-gc	Ribose-5-phosphate@20.05-gc	Ribose-5-phosphate@20.07-gc
Ribose;Ribulose@14.33-gc	Ribose;Ribulose	FALSE	FALSE	14.329	1	Ribose__Ribulose	Carbohydrates	C5H10O5	150.053	HMDB00283;HMDB00621;HMDB03371	C00121;C00309;C00508	5779;993;79021;439204;439203	chebiId:47013;chebiId:17173;chebiId:16880	Ribose;Ribulose	993;79021	gc	100	5.935	9	9	-	-	-	-	-	-	-	-	-	Ribose;Ribulose@14.33-gc	Ribose;Ribulose@14.32-gc	Ribose;Ribulose@14.33-gc
Ribulose-5-phosphate@20.27-gc	Ribulose-5-phosphate	FALSE	FALSE	20.275	1	Ribulose-5-phosphate	Carbohydrates	C5H11O8P	230.019	HMDB00618	C00199;C01101	439184;439399	chebiId:17363;chebiId:17666	Ribulose-5-phosphate	439184	gc	100	8.342	9	9	-	-	-	-	-	-	-	-	-	Ribulose-5-phosphate@20.27-gc	Ribulose-5-phosphate@20.27-gc	Ribulose-5-phosphate@20.28-gc
S-adenosylhomocysteine@1.39-pa	S-adenosylhomocysteine	FALSE	FALSE	1.393	1	S-adenosylhomocysteine	Nucleosides	C14H20N6O5S	384.122	HMDB00939	C00021	439155;25246222;193;5248805	chebiId:16680	S-adenosylhomocysteine	193	pa	10	8.022	11	11	-	-	-	S-adenosylhomocysteine@1.39-pa	S-adenosylhomocysteine@1.39-pa	S-adenosylhomocysteine@1.39-pa	-	-	-	-	-	-
S-adenosylmethionine@4.40-pa	S-adenosylmethionine	FALSE	FALSE	4.396	1	S-adenosylmethionine	Nucleosides	C15H22N6O5S	398.137	HMDB01185	C00019	34756;34755;5136	chebiId:15414;chebiId:67040	S-adenosylmethionine	5136	pa	10	20.833	11	11	-	-	-	S-adenosylmethionine@4.40-pa	S-adenosylmethionine@4.41-pa	S-adenosylmethionine@4.37-pa	-	-	-	-	-	-
Sarcosine@10.53-gc	Sarcosine	FALSE	FALSE	10.531	1	Sarcosine	Amino acids	C3H7NO2	89.048	HMDB00271	C00213	1088;7311726	chebiId:15611	Sarcosine	1088	gc	219	9.603	9	9	-	-	-	-	-	-	-	-	-	Sarcosine@10.53-gc	Sarcosine@10.53-gc	Sarcosine@10.53-gc
Sebacic acid@16.92-gc	Sebacic acid	FALSE	FALSE	16.924	1	Sebacic_acid	Fatty Acyls	C10H18O4	202.121	HMDB00792	C08277	5192	chebiId:41865	Sebacic acid	5192	gc	1089	14.35	9	9	-	-	-	-	-	-	-	-	-	Sebacic acid@16.92-gc	Sebacic acid@16.92-gc	Sebacic acid@16.93-gc
Serine@10.34-gc	Serine	FALSE	FALSE	10.342	1	Serine	Amino acids	C3H7NO3	105.043	HMDB00187;HMDB03406	C00065;C00740	5951;617;6857552;71077	chebiId:17115	Serine	617	gc	2850	14.486	9	9	-	-	-	-	-	-	-	-	-	Serine@10.34-gc	Serine@10.35-gc	Serine@10.34-gc
Shikimic acid@15.21-gc	Shikimic acid	FALSE	FALSE	15.21	1	Shikimic_acid	Unclassified	C7H10O5	174.053	HMDB03070	C00493	8742;1094	chebiId:16119	Shikimic acid	1094	gc	304	3.749	9	9	-	-	-	-	-	-	-	-	-	Shikimic acid@15.21-gc	Shikimic acid@15.21-gc	Shikimic acid@15.21-gc
Spermidine@6.45-pa	Spermidine	FALSE	FALSE	6.445	1	Spermidine	Unclassified	C7H19N3	145.158	HMDB01257	C00315	1102	chebiId:16610	Spermidine	1102	pa	10	10.017	11	11	-	-	-	Spermidine@6.45-pa	Spermidine@6.45-pa	Spermidine@6.46-pa	-	-	-	-	-	-
Spermine@7.20-pa	Spermine	FALSE	FALSE	7.199	1	Spermine	Unclassified	C10H26N4	202.216	HMDB01256	C00750	1103	chebiId:15746	Spermine	1103	pa	10	11.172	11	11	-	-	-	Spermine@7.20-pa	Spermine@7.20-pa	Spermine@7.23-pa	-	-	-	-	-	-
Stearic acid@21.64-gc	Stearic acid	FALSE	FALSE	21.641	1	Stearic_acid	Fatty Acyls	C18H36O2	284.272	HMDB00827	C01530	5281	chebiId:25629;chebiId:28842	Stearic acid	5281	gc	42669	17.378	3	9	-	-	-	-	-	-	-	-	-	Stearic acid@21.64-gc	Stearic acid@21.64-gc	Stearic acid@21.65-gc
Succinic acid@9.65-gc	Succinic acid	FALSE	FALSE	9.654	1	Succinic_acid	Organic acids	C4H6O4	118.027	HMDB00254	C00042	1110;21952380	chebiId:15741	Succinic acid	1110	gc	14427	2.921	9	9	-	-	-	-	-	-	-	-	-	Succinic acid@9.65-gc	Succinic acid@9.66-gc	Succinic acid@9.65-gc
Sucrose@26.87-gc	Sucrose	FALSE	FALSE	26.872	1	Sucrose	Carbohydrates	C12H22O11	342.116	HMDB00258	C00089	5988;1115	chebiId:17992	Sucrose	1115	gc	8274	6.184	9	9	-	-	-	-	-	-	-	-	-	Sucrose@26.87-gc	Sucrose@26.87-gc	Sucrose@26.88-gc
Taurine@14.11-gc	Taurine	FALSE	FALSE	14.114	1	Taurine	Organic acids	C2H7NO3S	125.015	HMDB00251	C00245	1123;4068592	chebiId:15891	Taurine	1123	gc	100	3.735	9	9	-	-	-	-	-	-	-	-	-	Taurine@14.11-gc	Taurine@14.11-gc	Taurine@14.12-gc
Tauro-alpha-muricholic acid;Tauro-beta-muricholic acid;Tauro-omega-muricholic acid@2.25-ba	Tauro-alpha-muricholic acid;Tauro-beta-muricholic acid;Tauro-omega-muricholic acid	FALSE	FALSE	2.25	1	Tauromuricholic acid	Steroids	C26H45NO7S	515.292	HMDB00932	-	101657566;168408	chebiId:133057	TAURO Î±-MURICHOLIC ACID SODIUM SALT;Tauro-beta-muricholic acid	101657566;168408	ba	65	3.877	10	10	-	-	-	-	-	-	Tauro-alpha-muricholic acid;Tauro-beta-muricholic acid;Tauro-omega-muricholic acid@2.24-ba	Tauro-alpha-muricholic acid;Tauro-beta-muricholic acid;Tauro-omega-muricholic acid@2.30-ba	Tauro-alpha-muricholic acid;Tauro-beta-muricholic acid;Tauro-omega-muricholic acid@2.23-ba	-	-	-
Taurochenodeoxycholic acid@6.84-ba	Taurochenodeoxycholic acid	FALSE	FALSE	6.839	1	Taurochenodeoxycholic acid	Steroids	C26H45NO6S	499.297	HMDB00951	C05465	387316	chebiId:16525;chebiId:9407	Taurochenodeoxycholic acid	387316	ba	15	12.992	10	10	-	-	-	-	-	-	Taurochenodeoxycholic acid@6.84-ba	Taurochenodeoxycholic acid@6.95-ba	Taurochenodeoxycholic acid@6.74-ba	-	-	-
Taurocholic acid@4.40-ba	Taurocholic acid	FALSE	FALSE	4.402	1	Taurocholic acid	Steroids	C26H45NO7S	515.292	HMDB00036	C05122	440567;5247;46783527	chebiId:28865	Taurocholic acid	5247	ba	50	8.395	10	10	-	-	-	-	-	-	Taurocholic acid@4.40-ba	Taurocholic acid@4.46-ba	Taurocholic acid@4.38-ba	-	-	-
Taurodeoxycholic acid@8.02-ba	Taurodeoxycholic acid	FALSE	FALSE	8.022	1	Taurodeoxycholic acid	Steroids	C26H45NO6S	499.297	HMDB00896	C05463	2733768;440687;92042745	chebiId:36261;chebiId:9410	Taurodeoxycholic acid	2733768	ba	12	18.685	10	10	-	-	-	-	-	-	Taurodeoxycholic acid@7.95-ba	Taurodeoxycholic acid@8.07-ba	Taurodeoxycholic acid@7.81-ba	-	-	-
Taurohyodeoxycholic acid@4.12-ba	Taurohyodeoxycholic acid	FALSE	FALSE	4.118	1	Taurohyodeoxycholic acid	Steroids	C26H45NO6S	499.297	-	-	119046	-	Taurohyodeoxycholic acid	119046	ba	19	23.459	10	10	-	-	-	-	-	-	Taurohyodeoxycholic acid@4.12-ba	Taurohyodeoxycholic acid@4.18-ba	Taurohyodeoxycholic acid@4.09-ba	-	-	-
Tauroursodeoxycholic acid@3.93-ba	Tauroursodeoxycholic acid	FALSE	FALSE	3.931	1	Tauroursodeoxycholic acid	Steroids	C26H45NO6S	499.297	HMDB00874	-	12443252	-	Tauroursodeoxycholic acid	12443252	ba	35	7.052	10	10	-	-	-	-	-	-	Tauroursodeoxycholic acid@3.93-ba	Tauroursodeoxycholic acid@3.99-ba	Tauroursodeoxycholic acid@3.90-ba	-	-	-
Threonic acid@12.73-gc	Threonic acid	FALSE	FALSE	12.728	1	Threonic_acid	Carbohydrates	C4H8O5	136.037	HMDB00943	C01620	151152;439535;5460407	chebiId:15908;chebiId:49060	Threonic acid	439535	gc	107	6.376	9	9	-	-	-	-	-	-	-	-	-	Threonic acid@12.73-gc	Threonic acid@12.72-gc	Threonic acid@12.73-gc
Threonine@10.70-gc	Threonine	FALSE	FALSE	10.698	1	Threonine	Amino acids	C4H9NO3	119.058	HMDB00167	C00188	6288;205;15341575	chebiId:16857	Threonine	15341575	gc	14626	10.997	9	9	-	-	-	-	-	-	-	-	-	Threonine@10.70-gc	Threonine@10.70-gc	Threonine@10.70-gc
Thymine@10.85-gc	Thymine	FALSE	FALSE	10.845	1	Thymine	Bases	C5H6N2O2	126.043	HMDB00262	C00178	1135	chebiId:17821	Thymine	1135	gc	100	10.315	9	9	-	-	-	-	-	-	-	-	-	Thymine@10.84-gc	Thymine@10.85-gc	Thymine@10.84-gc
Tryptophan@21.53-gc	Tryptophan	FALSE	FALSE	21.534	1	Tryptophan	Indoles	C11H12N2O2	204.09	HMDB00929;HMDB30396	C00078;C00806	6305;1148;9060;4099458	chebiId:16828;chebiId:27897	Tryptophan	1148	gc	144	6.588	9	9	-	-	-	-	-	-	-	-	-	Tryptophan@21.53-gc	Tryptophan@21.53-gc	Tryptophan@21.54-gc
Tyrosine@17.06-gc	Tyrosine	FALSE	FALSE	17.061	1	Tyrosine	Amino acids	C9H11NO3	181.074	HMDB00158	C00082	6057;1153;4300518	chebiId:17895	Tyrosine	1153	gc	146	4.425	9	9	-	-	-	-	-	-	-	-	-	Tyrosine@17.06-gc	Tyrosine@17.06-gc	Tyrosine@17.07-gc
Uracil@10.02-gc	Uracil	FALSE	FALSE	10.021	1	Uracil	Bases	C4H4N2O2	112.027	HMDB00300	C00106	1174	chebiId:17568	Uracil	1174	gc	2062	8.832	9	9	-	-	-	-	-	-	-	-	-	Uracil@10.02-gc	Uracil@10.03-gc	Uracil@10.02-gc
Urea@8.77-gc	Urea	FALSE	FALSE	8.772	1	Urea	Organic acids	CH4N2O	60.032	HMDB00294	C00086	1176	chebiId:16199	Urea	1176	gc	28283	4.722	9	9	-	-	-	-	-	-	-	-	-	Urea@8.78-gc	Urea@8.77-gc	Urea@8.76-gc
Uric acid@19.69-gc	Uric acid	FALSE	FALSE	19.694	1	Uric_acid	Bases	C5H4N4O3	168.028	HMDB00289	C00366	1175	chebiId:17775	Uric acid	1175	gc	100	7.746	9	9	-	-	-	-	-	-	-	-	-	Uric acid@19.69-gc	Uric acid@19.69-gc	Uric acid@19.70-gc
Valine@8.41-gc	Valine	FALSE	FALSE	8.406	1	Valine	Amino acids	C5H11NO2	117.079	HMDB00883	C00183	6287;1182;5237032	chebiId:16414	Valine	1182	gc	23657	8.561	9	9	-	-	-	-	-	-	-	-	-	Valine@8.40-gc	Valine@8.41-gc	Valine@8.40-gc
Xanthine@18.19-gc	Xanthine	FALSE	FALSE	18.193	1	Xanthine	Bases	C5H4N4O2	152.033	HMDB00292	C00385	1188	chebiId:17712;chebiId:48517	Xanthine	1188	gc	100	6.76	9	9	-	-	-	-	-	-	-	-	-	Xanthine@18.19-gc	Xanthine@18.19-gc	Xanthine@18.19-gc
Xanthosine@26.98-gc	Xanthosine	FALSE	FALSE	26.98	1	Xanthosine	Nucleosides	C10H12N4O6	284.076	HMDB00299	C01762	64959	chebiId:18107	Xanthosine	64959	gc	100	10.235	9	9	-	-	-	-	-	-	-	-	-	Xanthosine@26.98-gc	Xanthosine@26.98-gc	Xanthosine@26.98-gc
Xylitol@14.67-gc	Xylitol	FALSE	FALSE	14.667	1	Xylitol	Carbohydrates	C5H12O5	152.068	HMDB02917	C00379	6912	chebiId:17151	Xylitol	6912	gc	100	5.854	9	9	-	-	-	-	-	-	-	-	-	Xylitol@14.67-gc	Xylitol@14.67-gc	Xylitol@14.67-gc
Xylose@14.10-gc	Xylose	FALSE	FALSE	14.096	1	Xylose	Carbohydrates	C5H10O5	150.053	HMDB00098	C00181	135191;6027	chebiId:15936;chebiId:53455	Xylose	135191	gc	100	5.772	9	9	-	-	-	-	-	-	-	-	-	Xylose@14.10-gc	Xylose@14.09-gc	Xylose@14.10-gc

## Sheet: Area
Sid	12-dehydrocholic acid@5.28-ba	2-aminoadipic acid@15.22-gc	2-hydroxybutyric acid@2.50-sf	2-hydroxyglutaric acid@12.99-gc	2-oxoglutaric acid@13.00-gc	3-hydroxybutyric acid@1.66-sf	3-hydroxyisovaleric acid@7.82-gc	3-methylhistidine@16.86-gc	4-hydroxymandelic acid@15.21-gc	4-hydroxyproline@12.43-gc	5-aminovaleric acid@13.51-gc	5-oxoproline@12.34-gc	7,12-dihydroxy-3-oxocholanoic acid@7.06-ba	Acetic acid@1.80-sf	Adenine@16.17-gc	Alanine@6.92-gc	Alpha-muricholic acid@5.88-ba	Alpha-tocopherol@29.51-gc	Arabinose@14.16-gc	Arabitol@14.80-gc	Arachidonic acid@23.72-gc	Asparagine@14.11-gc	Aspartic acid@12.36-gc	Behenic acid@26.39-gc	Benzoic acid@8.76-gc	Beta-alanine@11.15-gc	Beta-hydroxypyruvic acid@5.43-gc	Beta-muricholic acid@6.15-ba	Butanoic acid@5.31-sf	Capric acid@11.44-gc	Caprylic acid@8.95-gc	Cholesterol@29.51-gc	Cholic acid@9.07-ba	Citric acid;Isocitric acid@15.79-gc	Citrulline@15.76-gc	Creatine@12.79-gc	Cystine;Cysteine@22.97-gc	Cytosine@12.37-gc	Deoxycholic acid@10.46-ba	Dimethylglycine@5.43-gc	Erythritol@12.29-gc	Ferulic acid@19.16-gc	Fructose@16.47-gc	Fumaric acid@10.07-gc	GABA@12.43-gc	Galactitol;Sorbitol;Mannitol@17.27-gc	Galactose;Glucose;Mannose@17.00-gc	Glucose-6-phosphate;Fructose-6-phosphate@23.79-gc	Glutamic acid@13.51-gc
BlM-exp2-liver_pre	NA	NA	178	NA	NA	189	NA	NA	NA	NA	NA	NA	NA	5494	NA	NA	NA	NA	NA	NA	NA	NA	NA	NA	NA	NA	NA	NA	1584	NA	NA	NA	NA	NA	NA	NA	NA	NA	NA	NA	NA	NA	NA	NA	NA	NA	NA	NA	NA
BlM_exp3-liver_pre	84	104	NA	969	76	NA	3820	101	12	954	132	72658	58	NA	1552	226417	858	4	230	681	15801	554	3805	1310	3634729	2133	2381802	646	NA	260038	361130	272	1269	28131	15	501	198	474	184	4372584	1345	204	2869	16887	867	2194	131	42	6602
BlM-exp2-liver_post	NA	NA	130	NA	NA	722	NA	NA	NA	NA	NA	NA	NA	2439	NA	NA	NA	NA	NA	NA	NA	NA	NA	NA	NA	NA	NA	NA	1370	NA	NA	NA	NA	NA	NA	NA	NA	NA	NA	NA	NA	NA	NA	NA	NA	NA	NA	NA	NA
BlM_exp3-liver_post	41	68	NA	1326	168	NA	4944	217	811	1255	182	119895	26	NA	8403	790711	36	313	706	1137	69998	1146	4344	2203	4103170	4895	2376889	123	NA	338118	432509	564	576	4382	168	634	438	1200	251	4550338	1971	98	6258	13927	812	3116	11646	159	17261
BlM-exp3-liver_pre	NA	NA	215	NA	NA	20	NA	NA	NA	NA	NA	NA	NA	5137	NA	NA	NA	NA	NA	NA	NA	NA	NA	NA	NA	NA	NA	NA	1437	NA	NA	NA	NA	NA	NA	NA	NA	NA	NA	NA	NA	NA	NA	NA	NA	NA	NA	NA	NA
Bl_matrice-exp1-liver_3a	NA	NA	NA	NA	NA	NA	NA	NA	NA	NA	NA	NA	NA	NA	NA	NA	NA	NA	NA	NA	NA	NA	NA	NA	NA	NA	NA	NA	NA	NA	NA	NA	NA	NA	NA	NA	NA	NA	NA	NA	NA	NA	NA	NA	NA	NA	NA	NA	NA
Bl_matrice-exp2-liver_pre	52	NA	NA	NA	NA	NA	NA	NA	NA	NA	NA	NA	45	NA	NA	NA	72	NA	NA	NA	NA	NA	NA	NA	NA	NA	NA	60	NA	NA	NA	NA	237	NA	NA	NA	NA	NA	449	NA	NA	NA	NA	NA	NA	NA	NA	NA	NA
BlM_exp1-liver_pre	33	29	NA	2294	136	NA	3629	46	21	715	159	101737	6	NA	128	446514	94	34	176	31	4464	1036	3133	6846	3555735	3174	2892005	76	NA	390268	449464	266	593	206772	223	346	91	296	447	5492435	173	10	11250	22655	1020	667	1003	22	5849
BlM-exp3-liver_post	NA	NA	98	NA	NA	293	NA	NA	NA	NA	NA	NA	NA	3103	NA	NA	NA	NA	NA	NA	NA	NA	NA	NA	NA	NA	NA	NA	1309	NA	NA	NA	NA	NA	NA	NA	NA	NA	NA	NA	NA	NA	NA	NA	NA	NA	NA	NA	NA
BlM-exp1-liver_pre	NA	NA	141	NA	NA	148	NA	NA	NA	NA	NA	NA	NA	4894	NA	NA	NA	NA	NA	NA	NA	NA	NA	NA	NA	NA	NA	NA	1139	NA	NA	NA	NA	NA	NA	NA	NA	NA	NA	NA	NA	NA	NA	NA	NA	NA	NA	NA	NA
Bl_matrice-exp2-liver_post	55	NA	NA	NA	NA	NA	NA	NA	NA	NA	NA	NA	41	NA	NA	NA	191	NA	NA	NA	NA	NA	NA	NA	NA	NA	NA	77	NA	NA	NA	NA	443	NA	NA	NA	NA	NA	169	NA	NA	NA	NA	NA	NA	NA	NA	NA	NA
Bl_matrice-exp1-liver_3b	NA	NA	NA	NA	NA	NA	NA	NA	NA	NA	NA	NA	NA	NA	NA	NA	NA	NA	NA	NA	NA	NA	NA	NA	NA	NA	NA	NA	NA	NA	NA	NA	NA	NA	NA	NA	NA	NA	NA	NA	NA	NA	NA	NA	NA	NA	NA	NA	NA
BlM_pre-exp2-liver	NA	83	NA	822	30	NA	47	195	71	178	514	35140	NA	NA	114	143284	NA	90	298	546	391952	55	279	2602	458461	2598	6449391	NA	NA	21042	130019	794	NA	3834	52	98	354	24	NA	84398	461	15	2699	4347	66	954	2461	30	1328
BlM_exp2-liver_pre	NA	NA	NA	NA	NA	NA	NA	NA	NA	NA	NA	NA	NA	NA	NA	NA	NA	NA	NA	NA	NA	NA	NA	NA	NA	NA	NA	NA	NA	NA	NA	NA	NA	NA	NA	NA	NA	NA	NA	NA	NA	NA	NA	NA	NA	NA	NA	NA	NA
BlM_exp1-liver_post	26	70	NA	888	88	NA	3822	149	922	853	75	105746	15	NA	3373	638019	60	51	378	487	47103	1068	2447	1419	2438889	3666	2484349	63	NA	294895	379619	1423	289	9429	27	1996	192	631	164	5351577	524	43	13282	12649	651	999	12173	66	6987
BlM-exp1-liver_post	NA	NA	71	NA	NA	320	NA	NA	NA	NA	NA	NA	NA	3632	NA	NA	NA	NA	NA	NA	NA	NA	NA	NA	NA	NA	NA	NA	929	NA	NA	NA	NA	NA	NA	NA	NA	NA	NA	NA	NA	NA	NA	NA	NA	NA	NA	NA	NA
BlM_exp2-liver_post	NA	NA	NA	NA	NA	NA	NA	NA	NA	NA	NA	NA	NA	NA	NA	NA	NA	NA	NA	NA	NA	NA	NA	NA	NA	NA	NA	NA	NA	NA	NA	NA	NA	NA	NA	NA	NA	NA	NA	NA	NA	NA	NA	NA	NA	NA	NA	NA	NA
BlM_post-exp2-liver	NA	138	NA	1431	107	NA	82	147	127	218	681	27731	NA	NA	931	237869	NA	23	278	642	28119	96	561	1074	1222106	2399	6559545	NA	NA	54592	183181	987	NA	3504	62	266	215	4	NA	553918	257	118	1724	5021	160	742	2566	23	1620
QC-exp2-liver_5a	NA	NA	56192	NA	NA	48804	NA	NA	NA	NA	NA	NA	NA	6871	NA	NA	NA	NA	NA	NA	NA	NA	NA	NA	NA	NA	NA	NA	4877	NA	NA	NA	NA	NA	NA	NA	NA	NA	NA	NA	NA	NA	NA	NA	NA	NA	NA	NA	NA
QC_exp3-liver_5a	204	17015	NA	966930	37225	NA	16734	1567	318900	1236404	151596	34704998	36	NA	254123	218622543	3302	3855	40267	40052	2861217	68301	2873803	10957	3714605	4162416	527123	12224	NA	449595	468833	2989554	3320	1059245	20473	646087	169886	11887	674	951242	106927	3385	1787781	5137193	301527	529887	38262818	872919	26253733
QC_exp123-liver_6a	258	NA	NA	NA	NA	NA	NA	NA	NA	NA	NA	NA	37	NA	NA	NA	5211	NA	NA	NA	NA	NA	NA	NA	NA	NA	NA	28965	NA	NA	NA	NA	4287	NA	NA	NA	NA	NA	614	NA	NA	NA	NA	NA	NA	NA	NA	NA	NA
QC_exp3-liver_5b	155	17503	NA	1004933	38235	NA	18001	1640	320940	1290227	166013	37081595	12	NA	273688	202313898	3449	4483	38233	46050	2646430	62389	3123046	8793	3698869	4289353	559822	12092	NA	468962	487875	3024093	3886	1098450	22615	662527	170911	12631	1235	1084199	110854	3768	1893023	5276466	294539	561421	38622281	923608	26664823
QC-exp2-liver_5b	NA	NA	57107	NA	NA	51110	NA	NA	NA	NA	NA	NA	NA	6091	NA	NA	NA	NA	NA	NA	NA	NA	NA	NA	NA	NA	NA	NA	5579	NA	NA	NA	NA	NA	NA	NA	NA	NA	NA	NA	NA	NA	NA	NA	NA	NA	NA	NA	NA
QC-exp2-liver_5c	NA	NA	52077	NA	NA	50531	NA	NA	NA	NA	NA	NA	NA	6109	NA	NA	NA	NA	NA	NA	NA	NA	NA	NA	NA	NA	NA	NA	4856	NA	NA	NA	NA	NA	NA	NA	NA	NA	NA	NA	NA	NA	NA	NA	NA	NA	NA	NA	NA
QC_exp3-liver_5c	162	19477	NA	1024527	39340	NA	18688	2206	327708	1342743	148382	34840366	36	NA	272906	195186739	3520	4084	43329	52571	2743351	75054	3227818	9102	3805383	4665643	571796	11947	NA	489255	505420	3296238	4169	1122893	24794	592331	188558	12874	745	1109192	117983	3391	1954025	5549438	323948	563755	39157990	919773	28436820
QC-exp2-liver_5d	NA	NA	46999	NA	NA	50132	NA	NA	NA	NA	NA	NA	NA	5292	NA	NA	NA	NA	NA	NA	NA	NA	NA	NA	NA	NA	NA	NA	4479	NA	NA	NA	NA	NA	NA	NA	NA	NA	NA	NA	NA	NA	NA	NA	NA	NA	NA	NA	NA
QC_exp3-liver_6a	NA	22230	NA	947059	36440	NA	15274	2479	307085	1294449	154215	34208929	NA	NA	247295	186534127	NA	4112	43989	48967	2244268	83027	3103913	7781	3601904	4175965	506667	NA	NA	430561	432905	3136982	NA	954007	24650	606589	210538	10683	NA	986480	94443	3229	1784373	5075381	283133	539605	37313661	832711	25282638
QC-exp2-liver_5e	NA	NA	48003	NA	NA	50436	NA	NA	NA	NA	NA	NA	NA	4954	NA	NA	NA	NA	NA	NA	NA	NA	NA	NA	NA	NA	NA	NA	4733	NA	NA	NA	NA	NA	NA	NA	NA	NA	NA	NA	NA	NA	NA	NA	NA	NA	NA	NA	NA
QC_exp3-liver_6b	NA	21794	NA	947561	35623	NA	15104	2154	308911	1268450	154658	34289622	NA	NA	239004	186812991	NA	4485	41509	51316	2313623	72045	3069166	7600	3654030	4228267	507564	NA	NA	437038	445654	3055823	NA	944657	24349	533406	202965	11296	NA	1003071	100049	3154	1782902	5128727	277675	525440	37321348	835663	25860606
QC_exp3-liver_5d	100	22476	NA	989358	38253	NA	18840	3040	329253	1329224	152613	38033526	32	NA	265065	186988223	3502	4182	42819	74068	3463590	72024	3304424	11904	4030312	4436233	660466	12007	NA	512685	506137	3307310	4479	1090714	26101	445176	240068	12865	933	1315436	116971	4408	1849678	5584702	298278	559039	38544541	869901	27576777
QC_exp3-liver_5e	149	NA	NA	NA	NA	NA	NA	NA	NA	NA	NA	NA	16	NA	NA	NA	3337	NA	NA	NA	NA	NA	NA	NA	NA	NA	NA	12175	NA	NA	NA	NA	4406	NA	NA	NA	NA	NA	627	NA	NA	NA	NA	NA	NA	NA	NA	NA	NA
QC-exp2-liver_5f	NA	NA	48190	NA	NA	51741	NA	NA	NA	NA	NA	NA	NA	4731	NA	NA	NA	NA	NA	NA	NA	NA	NA	NA	NA	NA	NA	NA	4908	NA	NA	NA	NA	NA	NA	NA	NA	NA	NA	NA	NA	NA	NA	NA	NA	NA	NA	NA	NA
QC_exp3-liver_6c	NA	21791	NA	948787	37460	NA	15511	1303	310318	1288409	154776	35345384	NA	NA	245910	187530948	NA	3964	42326	57482	2744384	67059	3182158	8528	3764584	4261447	497658	NA	NA	460936	442412	3087593	NA	953611	23520	491415	228897	12057	NA	1005350	104952	3600	1791661	5185793	284627	523005	37317884	836096	26008740
QC_exp3-liver_5f	251	NA	NA	NA	NA	NA	NA	NA	NA	NA	NA	NA	40	NA	NA	NA	3567	NA	NA	NA	NA	NA	NA	NA	NA	NA	NA	11833	NA	NA	NA	NA	3762	NA	NA	NA	NA	NA	700	NA	NA	NA	NA	NA	NA	NA	NA	NA	NA
QC-exp2-liver_5g	NA	NA	50137	NA	NA	52596	NA	NA	NA	NA	NA	NA	NA	5080	NA	NA	NA	NA	NA	NA	NA	NA	NA	NA	NA	NA	NA	NA	4625	NA	NA	NA	NA	NA	NA	NA	NA	NA	NA	NA	NA	NA	NA	NA	NA	NA	NA	NA	NA
QC_exp3-liver_5g	81	NA	NA	NA	NA	NA	NA	NA	NA	NA	NA	NA	16	NA	NA	NA	3433	NA	NA	NA	NA	NA	NA	NA	NA	NA	NA	4459	NA	NA	NA	NA	1790	NA	NA	NA	NA	NA	371	NA	NA	NA	NA	NA	NA	NA	NA	NA	NA
QC_exp123-liver_6b	41	NA	NA	NA	NA	NA	NA	NA	NA	NA	NA	NA	53	NA	NA	NA	4789	NA	NA	NA	NA	NA	NA	NA	NA	NA	NA	28413	NA	NA	NA	NA	4474	NA	NA	NA	NA	NA	762	NA	NA	NA	NA	NA	NA	NA	NA	NA	NA
QC_exp3-liver_6d	NA	21083	NA	963166	35119	NA	15343	2310	327197	1316879	148803	38149642	NA	NA	249442	186743256	NA	4568	43724	70495	2954791	69544	3234640	8813	3888033	4264958	505769	NA	NA	464606	452561	3194641	NA	967855	22646	461903	213967	10987	NA	1034614	107620	3318	1799027	5294348	274942	523500	37812742	849103	26372341
QC_exp3-liver_5h	224	NA	NA	NA	NA	NA	NA	NA	NA	NA	NA	NA	24	NA	NA	NA	3434	NA	NA	NA	NA	NA	NA	NA	NA	NA	NA	12203	NA	NA	NA	NA	4487	NA	NA	NA	NA	NA	893	NA	NA	NA	NA	NA	NA	NA	NA	NA	NA
QC-exp3-liver_5a	NA	NA	57985	NA	NA	46751	NA	NA	NA	NA	NA	NA	NA	10954	NA	NA	NA	NA	NA	NA	NA	NA	NA	NA	NA	NA	NA	NA	7351	NA	NA	NA	NA	NA	NA	NA	NA	NA	NA	NA	NA	NA	NA	NA	NA	NA	NA	NA	NA
QC_exp123-liver_6bb	235	NA	NA	NA	NA	NA	NA	NA	NA	NA	NA	NA	639	NA	NA	NA	5160	NA	NA	NA	NA	NA	NA	NA	NA	NA	NA	30386	NA	NA	NA	NA	3887	NA	NA	NA	NA	NA	517	NA	NA	NA	NA	NA	NA	NA	NA	NA	NA
QC_exp123-liver_pre.baliver2	119	NA	NA	NA	NA	NA	NA	NA	NA	NA	NA	NA	64	NA	NA	NA	5114	NA	NA	NA	NA	NA	NA	NA	NA	NA	NA	28680	NA	NA	NA	NA	3374	NA	NA	NA	NA	NA	442	NA	NA	NA	NA	NA	NA	NA	NA	NA	NA
QC-exp3-liver_5b	NA	NA	54303	NA	NA	47616	NA	NA	NA	NA	NA	NA	NA	10664	NA	NA	NA	NA	NA	NA	NA	NA	NA	NA	NA	NA	NA	NA	7131	NA	NA	NA	NA	NA	NA	NA	NA	NA	NA	NA	NA	NA	NA	NA	NA	NA	NA	NA	NA
QC-exp3-liver_5c	NA	NA	50158	NA	NA	47320	NA	NA	NA	NA	NA	NA	NA	9626	NA	NA	NA	NA	NA	NA	NA	NA	NA	NA	NA	NA	NA	NA	6868	NA	NA	NA	NA	NA	NA	NA	NA	NA	NA	NA	NA	NA	NA	NA	NA	NA	NA	NA	NA
QC_exp1-liver_5a	399	17650	NA	842917	23275	NA	11377	1354	292352	1173787	137471	36889500	1855	NA	232463	219178854	7245	3485	36422	22835	3968107	57624	3457799	17720	3427660	3069281	509627	69600	NA	350943	426935	3513481	5412	1140313	21268	1482908	88271	14146	747	991571	79410	2785	1036519	4239235	270465	194101	37652487	651761	25013547
QC-exp3-liver_5d	NA	NA	48649	NA	NA	46794	NA	NA	NA	NA	NA	NA	NA	9467	NA	NA	NA	NA	NA	NA	NA	NA	NA	NA	NA	NA	NA	NA	6909	NA	NA	NA	NA	NA	NA	NA	NA	NA	NA	NA	NA	NA	NA	NA	NA	NA	NA	NA	NA
QC_exp1-liver_5b	387	21282	NA	831869	22888	NA	11631	2538	288629	1136773	143573	36535157	1522	NA	237566	183228173	7032	3384	36476	30153	2132686	57894	3337600	10632	3331544	3235833	523080	70342	NA	339418	416422	3608284	5141	1118922	25914	1376389	112167	13464	701	1013973	77562	2890	1031395	4293384	237226	180677	37994171	652760	22935719
QC-exp3-liver_5e	NA	NA	48822	NA	NA	47352	NA	NA	NA	NA	NA	NA	NA	9351	NA	NA	NA	NA	NA	NA	NA	NA	NA	NA	NA	NA	NA	NA	7039	NA	NA	NA	NA	NA	NA	NA	NA	NA	NA	NA	NA	NA	NA	NA	NA	NA	NA	NA	NA
QC_exp1-liver_6a	NA	19914	NA	825508	21718	NA	12561	2257	290029	1187173	133796	34740422	NA	NA	222255	190589301	NA	3462	36406	38070	1970697	44803	3597248	8612	3370137	3612808	592356	NA	NA	366950	429871	3627980	NA	1063223	25533	1333729	119314	11351	NA	1172457	74724	2903	1005178	4193272	291316	179745	37525075	626555	23885906
QC_exp1-liver_5c	481	22967	NA	851826	24753	NA	12129	2293	290509	1205523	140694	37276401	1738	NA	237460	189899868	7181	3577	38166	33818	2053434	60901	3487889	9807	3385403	3554825	564957	70347	NA	355959	415273	3570753	4917	1128866	26297	1265827	115772	12820	662	1122159	80982	3060	1048338	4444630	263717	191453	37510830	661276	24332053
QC-exp3-liver_5f	NA	NA	48753	NA	NA	47537	NA	NA	NA	NA	NA	NA	NA	9418	NA	NA	NA	NA	NA	NA	NA	NA	NA	NA	NA	NA	NA	NA	7021	NA	NA	NA	NA	NA	NA	NA	NA	NA	NA	NA	NA	NA	NA	NA	NA	NA	NA	NA	NA
QC_exp1-liver_6b	NA	21771	NA	716454	20284	NA	11090	2466	276253	1041041	122099	31705156	NA	NA	179034	180451106	NA	4059	30498	36368	1859509	46987	3201278	6623	3111026	3227537	514643	NA	NA	341639	379878	3576394	NA	930314	23159	1112788	134043	9880	NA	1100514	69232	2453	843316	3602883	252976	141600	35531688	526939	20776085
QC_exp2-liver_5a	340	9433	NA	794597	22596	NA	9567	1740	260848	1209400	127941	46638045	22	NA	213328	219697374	6035	4104	37888	26110	3537090	43995	3223330	13445	4090627	2486118	499246	14436	NA	336698	388565	4088001	5403	1135366	18603	1519161	59672	10317	1009	896938	76343	3220	1127982	4213853	226105	234491	43671255	716951	25048147
QC_exp1-liver_5d	425	19297	NA	886957	24211	NA	13220	1791	304490	1264302	146980	37561976	1611	NA	241372	185441814	7042	3561	39056	39197	2170774	52649	3771700	9990	3495375	3764572	628935	71806	NA	364820	426267	3689498	5004	1177539	27851	1214591	127375	12669	753	1256087	85861	3258	1088900	4690072	278982	186056	38634762	683231	25303198
QC-exp3-liver_5g	NA	NA	48889	NA	NA	47528	NA	NA	NA	NA	NA	NA	NA	9053	NA	NA	NA	NA	NA	NA	NA	NA	NA	NA	NA	NA	NA	NA	7145	NA	NA	NA	NA	NA	NA	NA	NA	NA	NA	NA	NA	NA	NA	NA	NA	NA	NA	NA	NA
QC_exp1-liver_6c	NA	17767	NA	726020	19409	NA	11740	1411	276464	997259	122041	32158728	NA	NA	192107	171470000	NA	3860	29063	38661	1890258	39542	3031755	7321	3139888	3151735	496084	NA	NA	329058	379496	3680655	NA	953385	21636	1026524	119615	7737	NA	1089596	71300	2585	817257	3712184	228194	151860	35572078	551606	20263115
QC-exp1-liver_5a	NA	NA	46468	NA	NA	38763	NA	NA	NA	NA	NA	NA	NA	10831	NA	NA	NA	NA	NA	NA	NA	NA	NA	NA	NA	NA	NA	NA	4564	NA	NA	NA	NA	NA	NA	NA	NA	NA	NA	NA	NA	NA	NA	NA	NA	NA	NA	NA	NA
QC_exp2-liver_5b	300	11352	NA	865390	24986	NA	8899	3820	261835	1217745	136411	47161065	44	NA	222516	199158649	6157	3804	40066	73320	2941934	55792	3297448	9330	4080943	3085622	530578	13872	NA	390483	406263	4039974	5926	1150715	24892	1498372	68513	14128	667	994692	89215	2860	1129427	4564563	241156	277015	43072696	670542	25710679
QC_exp123-liver_post.baliver2	210	NA	NA	NA	NA	NA	NA	NA	NA	NA	NA	NA	48	NA	NA	NA	5241	NA	NA	NA	NA	NA	NA	NA	NA	NA	NA	28393	NA	NA	NA	NA	3601	NA	NA	NA	NA	NA	580	NA	NA	NA	NA	NA	NA	NA	NA	NA	NA
QC_exp1-liver_5gb	NA	NA	NA	NA	NA	NA	NA	NA	NA	NA	NA	NA	NA	NA	NA	NA	NA	NA	NA	NA	NA	NA	NA	NA	NA	NA	NA	NA	NA	NA	NA	NA	NA	NA	NA	NA	NA	NA	NA	NA	NA	NA	NA	NA	NA	NA	NA	NA	NA
QC_exp1-liver_5gc	NA	NA	NA	NA	NA	NA	NA	NA	NA	NA	NA	NA	NA	NA	NA	NA	NA	NA	NA	NA	NA	NA	NA	NA	NA	NA	NA	NA	NA	NA	NA	NA	NA	NA	NA	NA	NA	NA	NA	NA	NA	NA	NA	NA	NA	NA	NA	NA	NA
QC_exp1-liver_5gd	NA	NA	NA	NA	NA	NA	NA	NA	NA	NA	NA	NA	NA	NA	NA	NA	NA	NA	NA	NA	NA	NA	NA	NA	NA	NA	NA	NA	NA	NA	NA	NA	NA	NA	NA	NA	NA	NA	NA	NA	NA	NA	NA	NA	NA	NA	NA	NA	NA
QC_exp123-liver_pre.baliver1	231	NA	NA	NA	NA	NA	NA	NA	NA	NA	NA	NA	421	NA	NA	NA	4363	NA	NA	NA	NA	NA	NA	NA	NA	NA	NA	26771	NA	NA	NA	NA	3279	NA	NA	NA	NA	NA	431	NA	NA	NA	NA	NA	NA	NA	NA	NA	NA
QC_exp2-liver_5c	195	9302	NA	874089	24710	NA	10488	3291	258923	1201736	130075	47965209	39	NA	215462	189936726	5938	4007	39554	66210	2625723	51085	3295562	8581	4136468	3126152	518785	13804	NA	379340	409034	4107448	5088	1189816	23827	1372371	49518	11339	720	1019329	83922	3022	1150585	4812861	236905	285061	43050557	673589	25588326
QC-exp1-liver_5b	NA	NA	46345	NA	NA	40251	NA	NA	NA	NA	NA	NA	NA	10205	NA	NA	NA	NA	NA	NA	NA	NA	NA	NA	NA	NA	NA	NA	4866	NA	NA	NA	NA	NA	NA	NA	NA	NA	NA	NA	NA	NA	NA	NA	NA	NA	NA	NA	NA
QC_exp1-liver_6d	NA	17502	NA	710797	19419	NA	12369	2611	270982	967934	120386	33644910	NA	NA	182888	164063934	NA	3995	29958	40975	1868649	39975	3063905	7699	3126703	3027881	465268	NA	NA	335638	371900	3629927	NA	911077	18561	953107	92096	8424	NA	1056718	72304	2783	816688	3686902	219974	156011	36035172	534137	20078691
QC_exp1-liver_5e	341	17445	NA	754428	21137	NA	12153	1591	286098	994322	124569	36614479	1640	NA	197951	156915432	7885	3840	32448	44644	2111280	41945	3383706	8484	3229986	3261907	529456	69593	NA	330213	370957	3710286	4652	979265	20291	817696	131630	9841	698	1187131	72854	2774	927775	4135435	225985	165907	35785481	574547	20688057
QC_exp2-liver_5e	181	NA	NA	NA	NA	NA	NA	NA	NA	NA	NA	NA	33	NA	NA	NA	6593	NA	NA	NA	NA	NA	NA	NA	NA	NA	NA	14163	NA	NA	NA	NA	5682	NA	NA	NA	NA	NA	539	NA	NA	NA	NA	NA	NA	NA	NA	NA	NA
QC-exp1-liver_5c	NA	NA	46347	NA	NA	41371	NA	NA	NA	NA	NA	NA	NA	10172	NA	NA	NA	NA	NA	NA	NA	NA	NA	NA	NA	NA	NA	NA	5092	NA	NA	NA	NA	NA	NA	NA	NA	NA	NA	NA	NA	NA	NA	NA	NA	NA	NA	NA	NA
QC_exp1-liver_5f	423	NA	NA	NA	NA	NA	NA	NA	NA	NA	NA	NA	1603	NA	NA	NA	6882	NA	NA	NA	NA	NA	NA	NA	NA	NA	NA	69388	NA	NA	NA	NA	5075	NA	NA	NA	NA	NA	782	NA	NA	NA	NA	NA	NA	NA	NA	NA	NA
QC_exp2-liver_5f	288	NA	NA	NA	NA	NA	NA	NA	NA	NA	NA	NA	28	NA	NA	NA	6130	NA	NA	NA	NA	NA	NA	NA	NA	NA	NA	14355	NA	NA	NA	NA	5363	NA	NA	NA	NA	NA	621	NA	NA	NA	NA	NA	NA	NA	NA	NA	NA
QC_exp2-liver_5d	199	6574	NA	824883	21553	NA	10407	2075	238928	1063936	126471	48920844	24	NA	196059	182884505	5989	4200	40573	59394	2276406	31589	3478404	6648	4049392	2988683	564727	14233	NA	386610	419392	4484080	5832	1123428	16890	995381	15236	11144	599	1071257	79998	3255	1078416	4822801	221392	262031	42575948	653386	25386687
QC-exp1-liver_5d	NA	NA	47088	NA	NA	40506	NA	NA	NA	NA	NA	NA	NA	8638	NA	NA	NA	NA	NA	NA	NA	NA	NA	NA	NA	NA	NA	NA	4383	NA	NA	NA	NA	NA	NA	NA	NA	NA	NA	NA	NA	NA	NA	NA	NA	NA	NA	NA	NA
QC_exp1-liver_5g	476	NA	NA	NA	NA	NA	NA	NA	NA	NA	NA	NA	1574	NA	NA	NA	6846	NA	NA	NA	NA	NA	NA	NA	NA	NA	NA	68400	NA	NA	NA	NA	4446	NA	NA	NA	NA	NA	592	NA	NA	NA	NA	NA	NA	NA	NA	NA	NA
QC_exp2-liver_5g	235	NA	NA	NA	NA	NA	NA	NA	NA	NA	NA	NA	14	NA	NA	NA	5656	NA	NA	NA	NA	NA	NA	NA	NA	NA	NA	14306	NA	NA	NA	NA	5492	NA	NA	NA	NA	NA	672	NA	NA	NA	NA	NA	NA	NA	NA	NA	NA
QC-exp1-liver_5e	NA	NA	46740	NA	NA	40736	NA	NA	NA	NA	NA	NA	NA	8548	NA	NA	NA	NA	NA	NA	NA	NA	NA	NA	NA	NA	NA	NA	4475	NA	NA	NA	NA	NA	NA	NA	NA	NA	NA	NA	NA	NA	NA	NA	NA	NA	NA	NA	NA
QC_exp2-liver_6a	NA	7790	NA	903731	25856	NA	11919	2069	270535	1202373	143263	48212656	NA	NA	224755	185247134	NA	3977	43911	57884	2274150	43766	3530279	7484	4238420	3169015	583280	NA	NA	364129	465202	4357212	NA	1083510	20784	1408987	35128	13905	NA	1099733	86752	2906	1200175	4728996	234998	275207	43592596	726000	27055822
QC_exp1-liver_5h	350	NA	NA	NA	NA	NA	NA	NA	NA	NA	NA	NA	1459	NA	NA	NA	6775	NA	NA	NA	NA	NA	NA	NA	NA	NA	NA	67653	NA	NA	NA	NA	5074	NA	NA	NA	NA	NA	543	NA	NA	NA	NA	NA	NA	NA	NA	NA	NA
QC_exp2-liver_6b	NA	7370	NA	878257	25905	NA	13066	1225	272904	1135639	136618	48950930	NA	NA	227893	192576525	NA	4574	43665	63639	2384455	35655	3570977	7463	4322978	3056178	638094	NA	NA	388596	472239	4530746	NA	1213922	19902	1308294	21527	12647	NA	1224813	85595	3655	1226814	4843949	231436	263316	43736587	728063	25605655
QC-exp1-liver_5f	NA	NA	45591	NA	NA	41165	NA	NA	NA	NA	NA	NA	NA	8777	NA	NA	NA	NA	NA	NA	NA	NA	NA	NA	NA	NA	NA	NA	4462	NA	NA	NA	NA	NA	NA	NA	NA	NA	NA	NA	NA	NA	NA	NA	NA	NA	NA	NA	NA
QC_exp2-liver_6c	NA	6628	NA	890055	25313	NA	13393	2560	268563	1150128	134426	49576968	NA	NA	229318	175742905	NA	4300	44493	62397	2456388	36064	3659356	8024	4443650	3099935	722788	NA	NA	424931	501468	4494605	NA	1157609	17716	1134055	33180	12554	NA	1423676	83392	3571	1247604	4875437	225620	269488	43907895	749485	25963366
QC-exp1-liver_5g	NA	NA	45471	NA	NA	40635	NA	NA	NA	NA	NA	NA	NA	8956	NA	NA	NA	NA	NA	NA	NA	NA	NA	NA	NA	NA	NA	NA	4712	NA	NA	NA	NA	NA	NA	NA	NA	NA	NA	NA	NA	NA	NA	NA	NA	NA	NA	NA	NA
QC-exp1-liver_5h	NA	NA	46433	NA	NA	41244	NA	NA	NA	NA	NA	NA	NA	9386	NA	NA	NA	NA	NA	NA	NA	NA	NA	NA	NA	NA	NA	NA	4484	NA	NA	NA	NA	NA	NA	NA	NA	NA	NA	NA	NA	NA	NA	NA	NA	NA	NA	NA	NA
QC-exp1-liver_4f	NA	NA	44588	NA	NA	39592	NA	NA	NA	NA	NA	NA	NA	7109	NA	NA	NA	NA	NA	NA	NA	NA	NA	NA	NA	NA	NA	NA	4629	NA	NA	NA	NA	NA	NA	NA	NA	NA	NA	NA	NA	NA	NA	NA	NA	NA	NA	NA	NA
QC_exp2-liver_6d	NA	8681	NA	854902	23724	NA	13458	2394	280108	1177867	140847	50722798	NA	NA	229893	175458036	NA	4310	43190	51505	2327129	34515	3796652	6487	4502902	3072899	861015	NA	NA	414356	474718	4553454	NA	1196215	15506	987420	39706	10802	NA	1605313	82453	3615	1198341	5067459	228463	320234	43612982	741140	27662769
QC_exp123-liver_post.baliver1	271	NA	NA	NA	NA	NA	NA	NA	NA	NA	NA	NA	42	NA	NA	NA	4130	NA	NA	NA	NA	NA	NA	NA	NA	NA	NA	24778	NA	NA	NA	NA	2838	NA	NA	NA	NA	NA	496	NA	NA	NA	NA	NA	NA	NA	NA	NA	NA
Nacl-j3-exp3-liver_3	314	13475	45630	703680	28705	62285	16014	1086	213905	500284	122969	29322594	37	7813	176828	186045152	11076	3948	39038	33055	2912991	81993	1716499	9802	3558261	4510947	555186	17333	9080	441140	443127	2811798	16364	386113	14250	542876	107347	10952	810	1079585	113065	1982	3822643	4551261	231101	1242002	39778799	882295	15987701
FECES-j3-exp3-liver_16	131	12221	57020	798602	23678	81304	16053	1659	371093	838024	108336	26997789	7	8396	217017	159631884	685	4280	35151	49223	2488005	67155	1691238	9320	4082133	3734665	546632	9936	5697	523172	428762	3024623	1320	847955	12122	413626	108863	13470	211	1069200	134225	4391	1857226	2589979	325773	780014	41100374	616051	16625048
ATB-j7-exp3-liver_33	58	17590	57155	678979	49011	109916	13727	1760	301723	1050598	169895	35390553	34	8637	255673	159935721	232	4752	36304	43547	2942324	70988	2999390	8994	3319054	3238934	559771	3598	4621	475451	457558	3161560	1362	1864786	14760	568653	189245	10884	356	1098017	95645	3778	1468754	5631768	230850	325647	37550845	938922	30752829
AKKERMANSIA-j14-exp3-liver_63	336	20821	58405	1399429	26513	22106	15908	1985	373206	1596736	138920	31143858	27	4456	383304	278070350	4624	5033	36457	34812	1944756	64018	2902750	7633	3091666	5278544	676386	1601	2864	453931	481930	3174876	2068	1214768	21749	535624	383723	16415	466	1343698	80724	3886	764932	3407626	431908	162005	38987113	807805	25167123
Nacl-j7-exp3-liver_27	111	17602	41448	819415	21910	26812	11340	2701	318403	1631753	98016	28077155	14	8215	335082	246353474	3042	4716	54965	31018	2276039	61277	2171557	13844	4290804	4018032	624324	2348	5137	398408	341279	2975878	2044	874302	17614	478689	301660	11806	443	1198467	105624	2188	1457956	2796257	234428	377500	38932870	312997	13100475
ATB-j3-exp3-liver_9	1061	15639	57271	701488	41247	31100	16293	1198	278791	1124180	155657	39146103	41	7151	166667	155303035	1983	4014	62024	49871	2492611	83638	2501981	8810	3529207	3770906	711094	18988	4555	478314	457192	2808582	18597	712369	15393	680074	106607	10076	468	1416046	115275	4697	1880635	4234196	250698	763904	39885014	1025396	28895603
FECES-j7-exp3-liver_40	78	15684	45652	989765	37258	29433	16596	1593	249793	734319	118646	26042210	34	7847	164159	166829618	908	3460	29639	31245	1646895	48914	1911572	6013	2724903	3091564	846491	16033	3830	381091	442772	2599172	1385	489855	11533	449270	47370	9089	214	1665534	86110	2052	1328205	3888083	265305	501658	38717356	668040	20137585
AKKERMANSIA-j3-exp3-liver_22	29	17081	33506	759445	27738	38023	14762	1020	292047	735202	123352	31492915	20	7437	194716	161003499	708	3580	35558	38253	2068429	70194	2191784	7401	4573134	3354083	438004	7231	6722	483737	425637	2813163	1602	477083	9403	475089	85842	10422	265	855259	124033	9447	2240913	4143793	228402	730692	39335795	727254	17930195
ATB-j14-exp3-liver_50	52	15105	45138	480381	24972	21130	14112	1779	242339	1395599	110941	27383976	46	5975	169430	163763315	190	3477	26685	35082	1320696	39087	2795606	4855	3692624	2951569	577596	6083	4438	351106	388603	2622220	1254	972213	19113	557098	67743	9190	290	1112585	59773	2652	698494	4131888	224427	131926	34448308	564454	18056216
FECES-j14-exp3-liver_59	570	11159	64541	768429	36036	71279	16277	1712	288516	780175	188233	33693191	48	6344	232459	140472992	8741	3366	19719	23076	1707124	44647	2989019	8344	3921903	4524808	1548402	23167	3539	484513	465914	2774212	11063	1096036	15527	473292	164813	15538	396	2965807	82588	1884	978774	4162966	231135	190216	35891213	501285	32008389
Nacl-j3-exp3-liver_5	218	22263	66639	1508766	32018	38499	15599	1581	390771	2838969	179823	40232143	31	8088	364906	278972265	6062	4171	77099	60373	2943878	120453	3732458	8588	3634158	6429057	488047	4981	5548	434234	498865	3266526	2643	1183224	27036	826652	442497	16030	224	953410	147102	3779	1913972	6014733	351527	735792	41180476	742691	30135274
AKKERMANSIA-j7-exp3-liver_43	54	13930	32097	1032858	42208	21268	18980	2757	258135	1582090	110077	30550484	11	12634	253866	229369461	1233	4284	38553	38342	2031462	47931	2088594	7663	2951879	3645274	936293	15903	4874	362511	383656	2980398	1614	1131285	23791	743005	133444	9701	328	1827112	92724	3048	1268845	4248076	224980	261196	37320910	837831	13248913
FECES-j7-exp3-liver_37	119	19644	43924	1713861	26604	21671	18533	1535	292712	1074538	149309	36767570	69	7465	184799	207119590	3362	3601	41577	40034	2638021	83005	3539930	7890	1354246	5784340	648887	62722	6197	378858	395658	2909973	1782	353070	14855	567114	123547	11180	301	1258760	139784	2544	3099903	5995531	354809	1029651	39643585	1000864	23413411
ATB-j3-exp3-liver_8	24	12301	50403	483052	41713	35974	16315	1652	232010	1083032	147735	32605690	58	6793	171874	121680636	196	4158	34032	41201	2580232	76897	3088857	7066	3225899	2874666	907599	3621	6447	463746	499898	3069511	1282	1050239	13546	366311	95936	8067	364	1787108	102606	2714	2014762	5374812	182173	649672	37798350	713241	24994956
AKKERMANSIA-j14-exp3-liver_65	119	16156	50141	1127059	44811	40616	16452	1249	279856	1487872	178834	39040681	19	7183	272626	147450417	4972	4018	40894	41686	1792349	67065	2931513	7665	2786495	3731782	512934	3228	4770	448320	427957	3008997	2517	1922461	23029	568491	140750	14769	370	988485	100085	4122	1348798	5218156	295533	189361	38928806	773248	33140854
Nacl-j7-exp3-liver_26	311	19710	49668	1370301	38715	24576	16836	2558	433021	2482751	143573	33920211	7	7404	373126	277446783	3387	4668	47538	46853	2688322	89858	2501625	22270	3911411	7802470	467761	1934	7113	543824	468226	3231287	2443	1188346	32521	736626	367054	11791	1002	917584	142108	2124	2740101	4186669	401572	667344	40314081	700629	24643951
FECES-j3-exp3-liver_14	69	19205	55280	744922	34850	52857	18555	1249	396975	1142803	114862	32316280	13	6427	205655	185444371	899	4136	40178	55985	2700951	70677	2405917	8218	4578294	4406404	719462	16787	5736	515257	445255	3226909	1220	833557	19409	456541	159387	11712	146	1377492	146924	3209	2196790	4219204	347618	784250	40002566	1081625	21995751
AKKERMANSIA-j3-exp3-liver_20	102	16415	37135	1103197	63534	64308	16756	1795	310231	1148680	185560	43263079	28	6587	326406	162897187	740	4103	38744	52777	3023236	68988	3241508	7277	3645260	3560621	1179555	12507	5199	464479	418512	3320375	2322	1512097	16570	471784	240088	17121	285	2257549	130996	8167	1703772	4616535	293230	491302	38207172	1890080	35699739
ATB-j7-exp3-liver_32	366	19063	39840	723983	51192	21963	17047	1478	311087	1920199	203641	36754890	53	6231	216637	185567017	4756	3899	41012	61165	3040862	73614	3964543	10274	5504914	3551043	424752	20840	5678	467885	422850	3206589	14455	1100939	25888	890121	235445	10418	15416	801674	107076	6905	2221505	7897958	312440	450814	36498802	767594	41027014
Nacl-j3-exp3-liver_4	420	18702	35496	656988	31289	33806	14110	1219	383275	1088834	124887	33559662	39	6552	352355	225308350	3657	4079	36388	42407	2206518	68606	4023222	10918	2907155	7564742	483064	5283	2126	439674	418667	3122777	1836	977064	18625	635096	237892	9924	536	945211	118751	1098	1748512	6522558	257306	584211	41676324	972358	16393513
AKKERMANSIA-j14-exp3-liver_61	112	11982	39315	1141354	14720	19776	15571	1696	201478	1850624	100065	24999622	22	6496	260698	204157910	3151	4206	44875	31375	1351666	43563	2427338	6394	3646813	3901108	985617	5180	4398	470101	468473	2943919	2363	1008268	31821	499786	142162	14409	413	1908308	77228	3822	496926	4374859	277557	66693	32878596	262007	14299328
ATB-j3-exp3-liver_11	53	15491	49719	579639	33732	66372	18011	2940	295007	1017871	144670	32237832	31	6710	201542	125860190	244	4245	37161	55992	2869934	76740	2390272	7823	3884128	3802889	689673	9532	5639	434702	449878	3169766	1274	564308	15192	464046	137990	9837	332	1329983	118634	2575	2206444	4119854	254060	810426	40606289	980663	23936500
FECES-j7-exp3-liver_41	92	19806	58050	2332145	38267	95413	16890	1455	347112	954281	188323	40972737	30	11318	323436	193940605	1698	4751	44736	59398	3719115	122765	2838493	10029	3066198	5772083	587503	47771	7428	364928	369857	3447467	4017	357433	16927	684457	199895	10074	233	1133229	144107	2924	4571673	5757205	446255	1701362	42637890	1244095	29571921
AKKERMANSIA-j7-exp3-liver_46	65	15410	57627	1194237	34241	26186	14781	2570	386822	1875326	161250	42381742	34	7246	308982	240313810	1339	4468	55148	65843	3102947	102329	2949462	10307	2687004	4964555	534065	12709	5312	355851	345361	3411306	1435	650752	27371	703934	307259	13830	275	1020518	157929	5236	2647670	5213576	390377	805601	41694161	871960	27257646
ATB-j14-exp3-liver_53	30	9099	52396	732051	39675	49356	16233	1738	277084	1472997	174671	33005011	53	6028	190965	91765138	290	4023	29729	49472	1780551	36675	3734897	7669	2872836	2767942	1919722	2853	4144	422357	399979	3319100	1018	750007	11107	330721	119486	13490	291	3699581	83356	2644	943422	4535927	207781	205158	36828676	470534	30972207
Nacl-j7-exp3-liver_28	273	19765	47074	926405	42316	30742	16295	968	409195	1350881	129719	29972633	33	7452	328681	192717507	2731	4510	36373	38321	2087985	69403	1925911	12000	3595604	5241649	400942	3461	4254	439642	369831	3105096	2244	903724	15564	489039	176249	11030	556	736625	136552	615	2171972	3247377	338427	603072	40910753	596378	20203451
FECES-j14-exp3-liver_58	232	18343	38475	1211411	18815	19733	14744	3342	331928	2366438	119393	36011093	46	6916	409174	292732838	13312	4218	42729	51326	2645817	62210	4137992	8257	2962127	4133824	493702	6325	4721	413599	354625	3444387	3980	968790	45199	704069	520999	18412	646	940905	121378	3056	1322012	6383793	253850	254689	39177741	682288	15061428
ATB-j7-exp3-liver_35	66	14469	41887	802463	57933	33813	15131	1966	278443	1035881	160632	32331867	9	7469	169360	162296050	426	4471	35972	57406	3029291	65254	2953431	7669	3208072	4051510	1047976	5817	6904	505347	441126	3315779	1778	515739	13196	613366	167082	7757	472	2057087	100505	3868	2384304	6957782	239710	660402	37554485	1318325	26642592
AKKERMANSIA-j3-exp3-liver_19	62	24344	34457	731320	52097	45926	16709	2073	269850	1277046	216615	43208364	40	7760	214475	161765470	528	4523	42291	48182	3197163	78578	5489184	9105	3692239	3503218	810616	9338	6530	453344	433777	3449766	2014	614604	20310	573636	23606	16609	389	1596715	88396	4930	2826300	9318546	264807	733071	36737891	1068077	39980479
FECES-j7-exp3-liver_38	62	14524	34724	1381984	49611	25019	19620	1232	263394	1044863	143219	36894404	25	6325	251889	199722077	661	4036	40631	39120	2526566	56450	4393663	8044	3160480	3455690	1496464	8861	6049	395173	373632	3176864	961	754696	14090	590524	160106	9992	140	2923065	122551	2899	2103672	7606036	239324	611532	38309403	1886897	23539326
Nacl-j3-exp3-liver_6	233	12543	44255	1012573	29232	119358	16205	1301	364058	617119	135088	29409501	20	7692	378459	131369489	5557	3958	27766	36634	1993851	69218	2052645	6698	3247847	4418086	804099	3446	5920	449619	470912	2950538	1918	864247	12472	461607	211832	12029	274	1553362	94953	817	1649167	2475029	226727	633077	38764373	729291	22458233
AKKERMANSIA-j14-exp3-liver_64	241	15552	31764	852606	18686	24188	15268	1107	289163	712992	108521	26904890	62	5374	217231	168254217	6301	3436	41267	29987	1286464	55165	2414136	12054	2851100	3895997	631834	10161	3194	404628	415639	2747973	4056	1070032	19933	459154	190856	12774	565	1223672	64908	2252	702760	3523321	238607	123694	36846922	762370	15896169
FECES-j3-exp3-liver_17	45	17656	46228	752785	37897	64427	16268	1582	322354	1085000	126347	31245587	13	6479	224123	158775614	1026	4080	40658	59653	2759124	94859	2090850	8598	3502978	4292160	414314	22290	6958	506089	391762	3272071	1484	544437	18692	684086	178210	9600	383	817852	126063	3155	2316123	4381918	331210	901982	40866441	745819	19560214
ATB-j3-exp3-liver_7	43	16494	43894	362331	40602	48584	15597	2424	179705	722109	125672	29465666	22	5784	173459	162237531	311	3875	28031	37891	2025218	67120	5323908	8924	3550870	2575652	734579	3675	4533	464350	506573	2827215	1172	1156544	14067	453377	95972	8222	252	1429150	66395	1769	1863105	9134544	125662	395962	34722965	1294267	21623165
FECES-j14-exp3-liver_60	228	23877	31495	714222	37644	112239	15177	2440	309319	400335	156125	37518140	32	5509	302547	140779493	7537	4156	20553	26429	1463819	50670	2626001	7357	4036590	3351137	701416	4277	2500	482345	435476	2863430	2729	1599612	18753	395342	194189	10686	471	1345881	71314	706	982557	4705864	226854	139931	37153376	745885	26030508
AKKERMANSIA-j7-exp3-liver_44	57	23793	24986	1080427	37331	17580	14879	1746	285565	1764697	148995	39088183	83	7252	307314	162988218	1100	4273	78972	42219	2526598	63878	2773151	9014	3621773	3527020	675071	5741	3909	406557	384107	3133722	1096	1025383	28299	668664	234171	14606	374	1319395	77318	4276	872339	4102136	240108	166879	33131938	612809	24315067
Nacl-j3-exp3-liver_2	425	24484	61363	1503545	40445	35877	17271	2499	360897	1555092	179185	41897521	34	6763	218570	198479270	14093	4316	84467	55558	2847261	83568	3233523	7245	4349321	6499261	512156	9110	6496	472144	452592	3261315	5521	1314843	21446	719403	394072	12806	1328	1000826	126430	3459	1938913	4621333	370484	652975	37947277	522284	35184801
ATB-j14-exp3-liver_52	112	14311	53498	683635	16497	18698	17010	1958	282210	1884440	104038	27286398	26	5948	186916	170043501	250	3865	37267	57477	1676209	43928	2545174	5161	1789635	3387751	1318067	1526	4390	404992	439683	3012828	1051	844009	18299	424867	153187	8689	639	2600666	92033	3349	741848	3510611	255350	123460	37227314	641628	14456333
AKKERMANSIA-j3-exp3-liver_23	85	15771	61650	2126953	60948	60535	16332	880	258610	1166853	161195	36831199	13	6807	206379	176071796	1316	4375	43453	63349	2843587	66002	3013356	8373	5164853	4965572	835343	28361	5470	457373	377468	3201462	4821	449064	11582	465048	156558	16868	791	1629531	117145	8527	2216275	6967478	319454	854171	39094262	951037	27131997
FECES-j7-exp3-liver_39	62	15937	60863	1807305	42519	72893	17979	1696	352069	995328	165754	36972698	70	8485	245294	148632123	1237	4071	50865	57461	2706093	90673	3030623	8097	2581040	3656709	996129	14876	6191	385788	385559	3325078	2069	795717	17704	480559	239960	9322	410	1907074	134877	2435	2344571	4820687	325493	744331	39767559	607657	30129911
ATB-j7-exp3-liver_34	34	16727	42454	757135	44344	23721	16979	2688	275117	1169288	153022	32562986	20	7066	172118	183745627	274	4094	37626	59722	2745348	72888	2931096	10513	3669547	3767873	678881	4885	7941	471787	448917	3312537	1741	748649	17135	573110	148713	8546	439	1287806	112384	2382	2521723	7115621	232463	660028	38252235	1215611	25132437
AKKERMANSIA-j14-exp3-liver_62	128	17025	43217	1507117	30349	23669	16320	2318	291580	2258399	98815	28375637	29	5280	356655	254906511	2769	4428	45687	56380	1808559	63609	2720977	7722	3810123	4491627	747507	12684	4730	473612	466484	3223436	2747	1246836	35613	470746	271327	17741	273	1476770	106782	3474	1157460	5194516	366766	156227	37345815	697916	15573754
Nacl-j7-exp3-liver_25	756	15640	33574	733701	35867	20200	15120	2855	276731	1461906	116241	26975371	495	7704	292162	174357299	3562	3677	37904	31548	1870917	62339	2299239	11495	4115476	4391408	929665	5740	5044	467762	419293	2890872	5078	1261142	16341	523535	314648	10355	561	1825468	81322	1567	1148206	4182413	293867	262660	33841569	228573	17984973
FECES-j3-exp3-liver_15	20	17779	61951	962041	47773	90023	14845	1815	373661	869922	106094	26675089	30	8254	214733	126526425	1139	4029	42186	69375	2452928	75846	1697838	8259	3798187	3780461	567947	21209	6739	533267	439205	3238536	912	668337	19215	391040	167845	11110	335	1110038	135500	3327	2104395	4233517	300556	721699	40181591	1130832	15234028
AKKERMANSIA-j7-exp3-liver_45	64	22640	43406	1239394	32593	28517	15497	2829	290423	1249782	140980	35970528	20	7250	196675	153275081	1651	4427	37652	50546	2575339	81402	3092724	7540	2963642	4846240	482300	10608	7217	391189	376208	3080103	868	426616	21545	665887	236397	10275	158	955904	105264	2629	2622507	5344651	266870	751998	38824565	876246	22707465
AKKERMANSIA-j14-exp3-liver_66	88	21319	45367	812350	22890	24501	13614	1248	278384	1095368	125962	35032146	29	6006	218549	167682902	4563	4377	46834	43078	1503176	68134	2570783	7534	3469361	2726123	443049	5935	4742	439075	396904	2918123	1714	955791	22370	325402	125617	18569	433	878068	108383	2552	1385684	3937311	252639	222047	38091521	661667	19918285
FECES-j7-exp3-liver_42	26	17874	47072	1702816	38250	42562	16588	1813	296525	1117020	164048	33148597	23	7170	188020	179901625	575	4053	47271	57742	2725317	94733	2720553	8065	3395662	4043813	397596	10134	6990	366463	358162	3025046	836	466127	18426	548947	156982	9369	222	786304	138410	2336	3048457	6465635	301152	1166411	40196792	1226302	25864475
ATB-j14-exp3-liver_51	21	17733	41099	609944	29351	43237	15759	2122	292655	1280757	152050	35644387	5	5981	192249	138234414	439	4216	37470	47375	1749577	60774	3232264	6528	2906165	2390035	597443	3383	4061	367585	370022	3111442	370	1415975	14196	342050	160268	9125	362	1186922	79772	4060	1019314	3925834	240885	134466	36786973	714783	28977755
Nacl-j7-exp3-liver_30	995	21492	50843	1117292	47100	28490	14750	2305	245377	849654	155534	32226308	99	7866	166676	187431143	23052	4089	27115	39645	2496725	90120	3507469	6700	3418149	7420255	595693	17858	4998	473785	386569	2779431	10920	844785	24304	604117	210213	12473	809	1197981	105522	2049	1956691	7035479	270289	603734	38006763	907718	22828382
AKKERMANSIA-j3-exp3-liver_21	75	8078	55078	868535	46258	110841	17441	1988	345749	658585	100904	32345146	43	8258	215229	66005227	783	4181	46773	66316	2694464	51722	2031364	6346	4100007	2783895	1880053	13408	6618	454349	394953	3291496	1205	869969	9535	294551	111951	12415	306	3738826	133090	7919	1707923	3694277	210773	631735	39851379	617912	12663109
ATB-j3-exp3-liver_10	12	15190	60700	638934	32722	40683	17981	1165	326320	1095246	120043	28871307	38	6040	213966	127287929	904	3886	34276	65562	2908361	99112	2598948	7833	4277658	3712223	1031872	16471	5459	454275	487571	3282170	1396	638270	16603	454450	137542	8925	326	2006301	123468	3158	1914678	4142451	227250	722170	40132162	730738	18902527
ATB-j7-exp3-liver_31	19	20708	42669	395863	46414	39066	14974	1109	243214	857764	151162	34790836	7	8434	154158	159204576	218	5294	38008	53987	2278960	56363	3772470	6739	4193292	3870413	369981	5457	3121	451697	385757	3024784	643	577538	15762	441076	110570	8369	226	731232	91535	4188	1535012	7621426	207578	378734	37746788	1044309	24342061
FECES-j14-exp3-liver_55	401	20873	34833	1174070	29954	143460	15596	1996	358695	748178	152839	32935858	32	6252	420190	117364225	8090	4798	23504	29093	1733311	50131	2565154	8044	3414228	3923128	731901	4424	3327	480634	409348	3057888	3341	1418268	17447	523319	286081	10565	515	1438275	55246	1584	941885	2972871	194562	147554	35197043	607052	28029446
Nacl-j3-exp3-liver_1	187	19985	29732	875847	45654	58730	12719	2022	266139	727843	164345	35807056	20	5818	315828	158232575	8824	3869	27884	39705	2423028	75148	3291528	7790	2796852	4741711	374629	4387	5944	415920	412184	3023771	2377	1379321	16288	551606	329017	13158	882	753204	76622	1300	1760429	4884263	258216	483340	35826439	1193502	29462950
ATB-j14-exp3-liver_54	55	23451	50179	500826	32902	56891	16353	2525	341887	1190249	162152	48632727	13	5673	226813	191534024	373	4388	38468	65515	2392629	64598	3848475	7806	3412425	3301803	709479	2437	5082	512391	406438	3298619	1572	956212	15192	365131	221623	10213	501	1405453	103167	2647	1594015	5658611	273769	269467	38277666	861630	29364869
AKKERMANSIA-j7-exp3-liver_47	80	18024	39489	1133090	58421	37357	16602	2099	338157	1084349	155055	42729336	13	7418	293139	159517666	1517	4417	49949	69844	2679912	62389	3371492	8174	2779082	4002958	1111430	13209	5855	370486	356138	3219117	1102	1022283	10847	676898	176066	12141	388	2181588	124329	2917	1989434	6418562	299175	609799	39013641	879785	24200667
FECES-j3-exp3-liver_13	63	18265	51607	546201	38320	32411	15758	1866	246766	1477588	186246	35208045	28	5755	164362	215152025	627	4292	30162	52611	2930061	84498	6570387	6480	3803643	3808562	700946	9788	5077	550766	461618	3081240	1410	975929	19858	396094	119172	9500	377	1385178	96020	4717	2094353	8861462	263541	614564	36120723	1046179	33830687
ATB-j7-exp3-liver_36	16	16735	71534	593529	47044	47050	14512	3068	314695	1112022	153714	36857409	47	7515	201988	164920492	228	4336	34552	68264	3016190	76341	3722527	7289	3748758	4357692	444459	9250	4802	495045	417754	3310382	880	938818	12715	343260	180961	9207	202	907384	137428	3949	2049981	6847866	268410	614015	39596786	736304	26639204
Nacl-j7-exp3-liver_29	549	25499	30765	1014775	61114	35888	16089	1807	404019	1151840	187908	39845844	22	8651	315640	227723978	8695	3977	35584	55157	2444319	57138	3471240	10765	4037336	6078185	491730	3674	4273	435145	355662	3169454	3172	1501325	14919	692263	290195	11265	648	945386	137167	1032	2065552	6405314	372933	570153	40178187	506091	31646669
FECES-j14-exp3-liver_56	85	20067	37110	1065869	21896	31811	14348	3173	317915	1120785	132486	35924865	29	5956	253905	134971957	3380	4327	27561	41400	1913774	50995	2771880	6938	3019694	3334944	646805	3290	2615	427924	427999	3213226	2100	1249793	25922	357317	198712	12985	473	1268104	84196	2096	607578	3459051	236771	129666	36276064	1108453	23053711
ATB-j3-exp3-liver_12	50	18520	43818	519319	33172	26908	14918	3584	272753	1103337	120622	36261722	11	5525	168360	169904917	962	4198	34541	69192	2558652	72336	2656819	8684	4446512	3625469	424104	15642	3917	416030	380247	3037730	1280	417795	15540	544240	100867	8002	261	850506	145095	3508	2590144	5627171	251635	986764	40170059	970310	19020395
AKKERMANSIA-j3-exp3-liver_24	50	14147	34493	875443	30922	27872	18205	1624	372470	982873	143541	38676984	16	5913	274985	157829227	361	4522	38193	72901	2563452	94634	2763871	7385	3730412	4152098	1290572	48349	5147	545393	500209	3374494	1374	759283	12317	477984	123403	11631	283	2532473	154423	5990	1960244	3486079	242731	698131	39693537	728032	24103967
ATB-j14-exp3-liver_49	40	23299	51939	593095	34737	30178	14213	2289	299169	1746093	141172	45443755	28	6368	219664	193124786	220	4321	36211	53057	2088529	53373	3332043	6591	3160906	3497113	640210	2440	3745	397312	404880	3396957	996	1378265	34281	431164	179413	9720	239	1263125	86859	4276	703360	4192985	250480	95946	35159595	634540	23521619
FECES-j3-exp3-liver_18	68	13854	38357	582402	30887	50786	16158	1302	326491	545768	100760	31417911	77	5596	189043	127710765	443	3916	32841	62235	2124504	57302	2167441	6358	3170790	2961920	849223	7186	4721	447913	363705	2993072	1088	600700	8360	292166	92312	7499	282	1679724	128762	2383	1777866	3375494	192700	623183	39136653	751141	15132000
AKKERMANSIA-j7-exp3-liver_48	86	21417	54628	869075	16394	37163	17784	2155	357523	1372421	126226	39466127	24	6554	259134	188051483	825	5134	39346	71948	2266378	78359	2693058	7925	2978066	4267756	636112	9849	4281	376299	376000	3135659	937	840405	19510	379550	144977	12294	326	1265800	142658	1493	1495792	3096173	291148	649801	40857228	1475617	21035219
FECES-j14-exp3-liver_57	1299	31121	33355	1053465	56369	80513	13045	2613	360580	824093	235189	44482025	40	6434	406833	164785718	21905	4593	23761	28975	2112681	60984	4189922	9209	3128427	5765366	577286	14411	3181	416813	426096	3363277	6463	2627050	19024	543292	544526	14549	872	1134113	66287	1914	898222	6802954	340746	119278	35668137	506202	46223728
Nacl-j3-exp2-liver_2	213	8051	50472	1037933	22037	17990	10698	2875	273584	1578391	109734	39737004	37	3868	214843	244530110	9888	4116	29683	22697	2670920	44348	2927368	10225	4766192	2838011	834572	3436	3404	379068	444518	3907064	1631	1063317	19445	620287	67210	11280	251	1579612	84428	3209	705320	3164934	250340	116287	42424881	440301	21231387
MITSUAKI-j3-exp2-liver_22	60	10921	42862	767196	31596	86105	11914	1499	285884	866250	158890	55591041	36	9581	283007	156388723	575	4280	32292	47230	5782351	51167	2695065	36334	5116121	2401202	662071	8981	4762	542616	495472	4397062	1130	1003397	18510	402722	42210	13584	250	1275561	106803	4807	1873833	5131401	303524	516292	44451804	713610	33422380
ATB-j7-exp2-liver_34	182	11591	60975	497323	27697	86556	8837	1919	299968	1090388	151821	57424196	19	3427	186550	196832276	503	4150	53120	79828	3823477	64093	3503197	13990	4369345	2088438	509563	4288	3866	435353	467484	4382326	4428	1184909	16480	503450	54167	12551	327	968744	96990	2051	1361953	5030985	209424	225411	44846756	928052	31973732
MITSUAKI-j7-exp2-liver_46	1003	13329	48865	849032	26630	81731	12716	2728	351937	809447	149892	65084672	37	3616	289811	186884518	11626	4182	26280	63078	3080782	73631	3892321	11452	4196228	2910298	662435	23955	2272	363140	453918	4255119	11766	1736698	18601	549788	96675	11636	457	1353417	86021	1754	817848	3972015	213524	148249	43110610	1126509	32591869
BURKO-j3-exp2-liver_16	45	10237	44116	845000	21229	50837	10352	2281	295372	822791	144122	49676538	16	7635	225148	159690499	439	3857	28186	82015	3576390	62594	3042007	10493	4313847	2098274	769710	9020	4142	500379	515958	4072638	1366	1070877	16193	417209	60652	11737	352	1468724	118084	5024	1467558	4715176	249585	371089	44204799	679840	29326983
ATB-j14-exp2-liver_53	35	9161	42846	433346	19450	66107	10004	1458	238536	658292	117942	44640731	15	3600	162213	136315226	207	3893	31764	68507	3396579	44551	2766289	10924	3733346	2162536	694616	2136	3312	343876	443840	3799060	330	987653	9582	476752	59850	10213	453	1431369	74212	3323	949297	3538126	167616	157542	41140846	509241	24603218
Nacl-j7-exp2-liver_29	74	9926	40945	1550435	22493	44532	9829	3725	218361	2835209	109895	35492370	9	4193	256667	334603195	6112	4418	31609	67881	3574174	64752	4808997	10303	5340935	3531223	1506882	2740	2933	422697	468923	4267963	1323	1334498	38226	726243	115012	16791	340	2852786	107249	3310	841776	7010335	267709	92126	40648081	492953	14732770
BURKO-j14-exp2-liver_59	318	12025	59624	984301	30773	68573	9569	2405	283039	924282	156643	51333776	101	4317	217322	175542620	1383	3995	23983	65437	3351778	72958	3056938	8850	3828929	3773594	473134	16322	3391	391453	430401	3976807	4250	1763447	18535	616107	84476	14432	326	947161	82335	3198	1205906	4317646	349369	251451	44233847	561903	33318062
BURKO-j7-exp2-liver_40	18	10692	77001	1197453	28181	34166	10144	1986	271910	1635404	172587	49793722	39	3188	208890	203046255	1702	4363	29186	66593	3383051	66679	3935492	9725	3483243	4034284	1051151	6588	4250	437836	466627	4480506	972	1144669	22556	517036	100287	15775	309	2036175	93504	3679	1052258	4015090	264561	162972	44809823	659620	36722560
HIRAE-j14-exp1-liver_67	520	18761	47813	545993	24118	25555	12512	1065	268452	925888	112128	28934886	4260	6191	205605	227728778	4280	3063	35015	21286	2907135	55330	3481388	11479	3877343	3629657	1097677	25898	2601	410086	425401	3193826	6358	1024788	19501	327392	107421	10652	787	2071625	46618	2374	828231	5185734	249270	110338	36694977	514565	19069050
BURKO-j3-exp2-liver_15	52	11073	45175	901407	37529	81561	10070	2147	249572	1275944	156017	54658712	17	5971	255345	159148181	831	4448	26158	73061	3428366	50026	2959576	8980	5155250	2571542	527852	13290	6335	479809	497380	4349611	1629	1280982	16314	448181	73210	13375	252	985718	110452	7149	1646458	4798009	305431	564313	44071359	917632	35109133
ATB-j7-exp1-liver_39	71	19371	28089	559291	33852	45645	11936	2163	285244	988664	140826	34392642	12	5426	279194	191951438	489	3476	36899	28622	3632927	59429	2908832	13198	2946378	1729894	431709	5832	3508	362774	391860	3757534	722	1979093	15604	620600	90842	11927	245	848125	69957	2225	957193	5028677	167806	153360	36550143	656749	25357789
Nacl-j3-exp2-liver_5	465	6746	59188	1434416	10451	23301	11169	2573	314549	1830507	91840	40514447	998	3469	204828	241980957	14888	3979	37702	61118	2455177	74463	2367209	7406	4824507	5380932	870197	15393	3703	390052	508386	3845832	9354	557010	30072	486538	92052	16554	1419	1625002	129931	3580	1354349	2448892	280023	250244	46512120	689738	14756342
HIRAE-j14-exp1-liver_71	556	22610	68799	3621977	25435	24370	12420	2862	421893	1745856	231866	47913641	3958	5346	240990	284619393	25780	3890	36066	38098	3518038	83543	3858699	13475	3375520	7914546	407940	146472	3138	431425	457968	3946979	12304	965338	29280	894443	263543	15718	1199	795366	97374	7462	1431650	4456353	480161	230180	40633443	643653	44369771
ATB-j3-exp2-liver_9	340	4885	60599	1315357	27129	20392	11699	2706	257206	1774705	127943	37488849	227	3298	234120	277293330	8956	3868	28600	58255	2344390	50101	4065342	7223	4437906	3820731	834821	3944	3496	519936	556728	4014076	2326	1220970	18537	406474	100259	15981	707	1560697	91993	2714	921748	5455560	261071	164187	44459032	1632774	25533418
Nacl-j7-exp1-liver_31	2829	34590	37129	669344	18743	30867	11889	2442	269454	903581	119086	32758615	471	6708	203093	227455481	17758	3357	22736	17294	2694328	70900	3419323	11706	3422288	4072608	844201	36951	3690	499798	494780	3384621	15014	1129662	20569	542698	97167	13893	1475	1663780	50876	2319	791297	5215057	352762	110372	36137654	580348	19527606
MITSUAKI-j3-exp2-liver_21	111	12039	45689	1063788	24662	47971	11198	3100	276323	1252829	191150	57425643	16	8265	206229	218155185	3297	4347	44917	84196	3161838	78905	3883963	10248	3919368	3719395	682407	62473	7704	415824	459654	4269798	20524	1006608	21121	648026	66926	11631	335	1288432	121877	2691	2311184	7570101	470185	849682	45438291	219484	37655794
FRAGILIS-j7-exp1-liver_53	21	25210	45408	530937	19927	51893	11464	1035	316646	523998	156746	43492192	18	5604	195897	206208102	5968	3390	34285	23002	2465610	61455	3141771	10304	3474801	3390498	521799	4728	4298	353002	390229	3514687	2274	951661	16489	310042	68078	13244	910	892628	84520	5304	1187881	4233118	193875	217155	39395963	524420	26173371
BURKO-j7-exp2-liver_39	321	5101	60245	811838	20695	26904	9826	2124	224842	1102229	94400	31376039	28	3599	179807	196542478	4812	3869	40980	55409	1931150	73519	2147719	7501	4516940	3121123	681252	10369	5779	400242	448301	3754854	6888	577750	16433	411730	28936	11692	339	1292290	85155	3183	1041523	3041546	201747	193345	42841238	333614	15982485
BARNECIELA-j14-exp1-liver_84	68	15751	55961	971759	33504	34771	11085	2059	269096	1511995	279132	31322186	77	4948	171521	183386343	2077	3200	18651	18090	2104157	47529	4803965	9100	3573523	4293758	499935	4613	2781	313204	404157	3435349	3165	1272796	24626	706927	110133	13965	623	918050	64486	2479	840952	5572289	269620	139348	36731997	562679	59937993
ATB-j7-exp2-liver_33	60	11776	36421	536503	26789	33192	14086	1360	292802	912509	132002	56476520	8	2797	242216	208704062	274	4256	67084	76147	2643345	54307	3392821	7304	4533945	2815150	880962	2649	2381	456530	443235	4587747	6288	1346236	22884	364566	121117	8491	285	1694373	98549	3882	1013269	4641701	222248	167639	44510327	993399	29152387
ATB-j14-exp1-liver_64	30	18856	48428	384942	29605	69178	11409	2132	198872	731831	173840	31012041	4	5423	138929	147268806	186	3585	27079	19337	2188271	49437	4195132	8407	3712135	2320157	592723	1570	2876	332439	433699	3253177	562	1426026	15292	377763	108011	10379	108	1122858	62691	1850	934527	5375993	177095	130940	35996776	497660	34262265
MITSUAKI-j14-exp2-liver_64	272	9581	1575	836757	25459	23211	10278	2304	315652	563224	149717	53049050	2062	880	217006	175408812	8707	3892	31010	65781	2320472	62839	3065496	7576	3480929	4059728	475247	21170	639	438600	442925	4140214	8006	1295000	14202	582751	100471	10180	2448	1003438	84591	1803	1353756	3441322	214921	322247	45239257	679655	32685595
FRAGILIS-j7-exp1-liver_49	553	23726	40518	716956	20786	62419	11440	1957	330619	606702	115520	31535042	36	6066	226374	216857926	12960	3574	58632	28046	2343560	77621	2683796	8512	3313119	3251913	354837	42030	4332	346043	402428	3622855	12041	1479372	23201	585910	129688	12384	1517	710942	68788	1495	1197701	3970845	240310	216952	38480032	690607	18758013
ATB-j3-exp2-liver_10	17	7210	40912	611970	33794	17051	11497	1316	196365	1209959	91887	36229365	48	3746	148135	222800205	393	3779	25845	28127	2931605	51686	2484338	9111	3573798	2372485	1113579	5501	3198	539021	522221	3857169	536	569043	13726	592725	34464	8273	227	2116846	76534	3574	1142829	4335840	196090	250259	42846712	780013	14503403
BURKO-j14-exp2-liver_58	125	8780	41535	762442	29964	47393	9659	1997	198195	635385	137171	41454701	15	3686	153938	146796230	176	3934	29354	44228	1744898	41739	2854291	7968	3643200	2254870	565522	2474	3599	384597	425366	3681083	1731	1612894	18368	504106	22010	9515	246	1130480	72328	2166	804981	5176520	190508	125583	42321767	608738	25464291
BARNECIELA-j14-exp1-liver_79	142	27693	39373	741466	26614	21656	11490	1554	239243	2025503	154348	31650908	42	5344	185321	277975696	5954	3473	55563	23810	2285471	71705	5798839	8900	4062168	3845941	520874	9709	2439	317415	427405	3434260	2010	1435122	30329	450193	178849	13908	226	988822	61347	3498	834955	7560568	307628	78357	35531507	357882	29604171
ATB-j14-exp2-liver_52	13	10771	38402	606181	22952	49667	13179	3452	237789	938503	165992	53625352	28	4685	167135	194496048	272	3893	39921	50741	2310929	39369	4217919	9598	2755666	2755548	700493	2098	4817	350933	419721	4149654	478	1173435	13980	745949	69677	8030	376	1429387	85864	3792	1353899	5802455	184231	216898	44979128	668517	35277994
ATB-j3-exp1-liver_7	55	22883	49891	468860	18043	58775	12936	2042	325053	995706	165760	42188472	69	11245	188130	168895323	374	4150	40814	31694	3506106	65664	3355608	10005	2949360	2637525	733695	4478	3402	361953	435555	3657536	560	839281	16552	597151	122603	13150	131	1431420	78253	2933	1268477	4736936	226737	235629	38512257	486548	31977090
Nacl-j7-exp2-liver_27	324	9470	55612	1013301	31058	22713	11520	5456	224039	1238915	150413	54364040	372	3876	193150	237767114	16493	4370	21526	40287	2432773	73331	4542650	9185	4200895	4644043	749636	9280	3958	459513	479450	4246593	4081	1283394	23897	549156	89596	15929	407	1344605	86449	3571	1105608	5078987	250759	160994	42659794	603404	30090129
ATB-j3-exp1-liver_11	19	19886	42871	460784	19021	52275	11313	2893	241418	974625	150408	30332612	27	5212	179086	143432986	176	3452	31795	26229	2669223	73268	3102239	9348	3721918	3468115	486525	3072	2659	418516	518730	3361232	532	907517	17136	420299	76927	9822	147	922537	66040	1969	1057657	3063866	192517	255282	36688075	570659	28291653
ATB-j7-exp1-liver_41	4	21370	34939	453262	27135	35795	12925	1292	290656	924474	144157	42856420	2	5868	248162	194174721	336	3745	34286	31677	2764078	49029	4093681	8978	3361536	2828216	632824	1833	3522	379274	439028	3619047	614	1457482	18987	730023	83706	11079	154	1239241	77309	4780	712216	4643155	203005	141669	36549643	256181	30773289
ATB-j3-exp2-liver_8	52	10371	49551	492681	30169	65992	11696	1970	303698	868257	133376	52107252	13	3608	185316	215282219	718	4360	95004	84752	2934710	68337	3589802	8659	4249960	3063499	739439	6144	3897	496047	540604	4220712	1183	1078386	14784	519408	41887	10205	641	1386026	94102	3353	1623780	4390905	183622	410811	45089514	850461	28675436
BURKO-j14-exp2-liver_57	150	13741	37532	1454584	25411	120725	10917	9407	378164	818887	134295	58833676	11	4442	295136	183514070	931	4200	28348	71989	2781308	54474	2671889	8660	3725680	3625857	412774	13727	3784	380187	423924	4539128	4296	1060654	15607	731368	110601	12767	261	777843	119027	1808	1535971	3655641	290919	436187	48621686	692634	26738818
BARNECIELA-j3-exp1-liver_25	56	22788	35831	762705	15393	17930	12883	1758	251866	1606136	80936	28408670	29	5341	194834	168379807	228	3255	31600	28692	1819647	63656	2061140	7020	3670703	2418877	593686	4591	4514	494285	512512	3392546	675	579382	26187	530118	75456	10614	121	1164108	77365	3891	878731	2358473	217878	159883	20081852	370025	12188239
MITSUAKI-j14-exp2-liver_65	80	2463	59026	219877	4268	56067	34	33789	91933	62657	15440	28918232	41	3493	50453	66791403	10153	4031	5443	64601	2543721	7438	644481	7399	859397	4422030	3411423	16386	2714	96854	118183	4608669	3284	338230	961	15480	45618	4107	406	482097	53512	1712	3593735	1246950	61720	153803	73455688	1450609	3441281
Nacl-j3-exp2-liver_3	115	5430	36565	1112742	18273	14487	9980	3100	158084	1012117	82360	29068003	59	3041	166778	167399231	5433	2762	26743	34025	1262599	39496	2056343	5909	3705432	4754823	967805	4418	2909	384239	457308	2811168	1604	813208	18044	387944	22130	11808	255	1798229	53296	2268	365814	2477496	225726	44800	32621352	235875	12691194
HIRAE-j3-exp1-liver_17	28	15480	46733	393121	18836	44021	10553	1212	281824	969098	97341	30774841	24	7891	160275	140545818	108	3804	30690	29603	1934549	61733	3069195	6362	3809457	2351762	553711	3297	3563	552515	566163	3249666	717	726339	13276	256317	42741	8536	334	1059473	98721	2503	1247220	3529478	205015	287062	39236658	649458	19271276
MITSUAKI-j3-exp2-liver_24	14	9118	32478	940843	21448	60079	9457	3655	263916	964955	135133	54007231	7	6565	209154	171796618	734	4632	35899	44297	2409234	58546	4416796	9728	4810570	2132725	695216	10118	3519	422459	426494	4152006	1875	1219285	25807	374389	68812	12653	41	1262880	79917	1793	1160085	4921255	239875	318153	43692973	767160	29703082
ATB-j14-exp1-liver_62	33	15216	57493	473146	36028	49243	12548	1637	256175	1004274	161280	32309942	62	5735	186386	143394170	326	3440	35123	22771	2042932	51248	3249820	8605	3089795	2936560	1163586	1424	3614	354573	443042	3502829	861	1714358	22596	380599	99299	9929	139	2233686	62727	2567	838365	5004764	181873	111627	35489604	899689	30201549
ATB-j3-exp2-liver_12	51	10227	38030	564119	31431	57330	12027	3603	318449	925922	153113	56700065	11	3572	218010	192934438	592	4595	39819	73314	2982974	66961	3841185	7714	4171899	3063498	521824	3684	4457	480693	493973	4424336	2482	1016159	15282	557167	78539	9465	353	987249	113812	2321	1579567	5564954	231554	417777	46153342	524666	30413205
BARNECIELA-j7-exp1-liver_57	47	25022	51358	1216038	8917	19557	14300	2961	351505	1229858	121395	41755533	57	5090	217395	229957651	6506	4404	55005	33165	2314413	61660	4353277	7435	3150904	4390253	727872	3245	3200	395872	503348	3784286	1441	624292	26601	819878	115822	14148	151	1391019	108202	4377	889211	2868284	266777	157232	38179740	595101	17774079
BURKO-j3-exp2-liver_18	117	13939	34133	1000435	27087	37445	11847	2403	293409	1256209	236696	70412184	41	7768	222777	220532778	2013	4531	29561	60273	2750947	44827	4352856	10320	5522419	3804941	594684	23504	5549	542706	522347	4451497	3807	829532	20041	737896	52950	11436	656	1133363	146178	8430	1494186	5218186	344032	489283	43904107	492794	51915312
HIRAE-j7-exp1-liver_45	327	14683	33736	769957	21080	38899	12996	2485	259613	807097	106248	29540064	59	5954	187765	136357775	3801	3643	27288	23541	1721143	48512	2560705	6554	3719921	2430848	1129697	13966	3315	374560	471508	3363277	3590	1416357	15437	409897	94939	10322	425	2198982	66534	1904	765013	3849506	214076	139052	37309413	385059	16824971
MITSUAKI-j7-exp2-liver_45	949	10893	38649	939934	26107	62449	11686	2744	292782	751998	118577	52701110	1227	3979	253000	170182768	34682	4194	30331	58988	1914384	51821	2937268	8284	3829449	3449219	565481	58159	3771	369588	458677	4372272	16758	1677474	17326	501210	63577	11615	1996	1193594	92077	3157	1072636	4038674	228674	199894	45236917	568410	22228104
FRAGILIS-j14-exp1-liver_75	177	27684	31022	949678	33588	44223	13736	2741	255436	797105	210451	43836852	22	6461	252098	155371736	20357	3921	31051	24412	2227979	64541	3897618	9870	4449532	2901317	605270	16481	4180	466590	509653	3570646	2505	1775588	18871	460229	185619	15513	1371	1182773	79186	2034	1210509	5348568	287842	197724	38640316	607537	40171578
Nacl-j7-exp2-liver_28	895	9978	48407	1013489	31489	40668	9178	4693	276547	978582	138681	48970981	1111	3801	227575	173397330	21848	4410	23550	44009	2212575	53492	4235908	8707	4578315	4310784	625647	26389	3915	428069	481634	4298020	8965	1346510	21271	431119	43052	15020	1042	1114030	81318	2489	1019230	5933584	248657	170315	43915046	526203	29494469
Nacl-j7-exp1-liver_35	279	28580	43733	809901	13291	23564	12427	2819	342735	1558458	160049	52828175	40	5769	258621	277567493	9206	3903	38799	24473	2328549	68779	3861218	10711	2765346	3957359	395500	5305	3825	418966	418939	3703663	2580	815736	28219	667216	211403	13511	504	770070	96619	3807	1074812	4102149	329305	152342	38748061	468046	28364707
MITSUAKI-j7-exp2-liver_47	530	11050	34248	574298	19604	71907	10108	1716	266494	514961	118808	46789069	25	3082	179786	140829543	7689	3585	21209	44079	1473842	40848	2418200	5722	3358292	2071943	1337917	32723	3139	323413	438979	3775149	13997	1147528	11537	413958	15718	9462	1304	2416447	73298	1040	893869	3617686	171593	188007	43384424	813872	21152553
HIRAE-j7-exp1-liver_47	1325	16411	33560	755003	32485	25290	11739	1895	279856	798698	167918	29240630	70	4819	173197	157302394	9611	3228	22528	17245	1716223	45419	3471101	6514	3995550	3260912	694356	32168	2777	359851	449079	3243572	17994	1246600	14016	689806	84052	10515	1152	1351913	66439	3213	830421	4608941	230467	176693	36785614	387448	29417314
FRAGILIS-j3-exp1-liver_21	63	13277	40495	972490	26387	24581	12006	1806	268673	1431748	105256	29980646	49	5224	197302	137419336	972	3506	32057	32138	2055848	58801	2951778	8146	4020685	2141669	871873	5704	3065	419159	440256	3330338	844	1225950	15134	370126	98663	18782	136	1665602	79879	2803	1027258	2943228	258947	210073	38528397	1083158	18797134
MITSUAKI-j14-exp2-liver_63	62	7723	45453	1025873	16267	39213	9870	2062	295927	547338	84069	34221562	43	3336	207583	148932150	11578	3849	31982	56584	1876827	34347	1910549	6166	4367324	2663012	474939	9771	6326	388762	437944	4164917	4867	766200	12860	565985	24882	8919	1095	916250	96281	2090	1227157	3166175	144755	288254	46342197	865293	10867592
Nacl-j3-exp1-liver_1	2103	33644	53051	1403115	40736	38252	13385	4810	355250	1086322	219542	47109316	3107	5086	356487	272654166	43551	4486	32405	30389	2518072	74850	5215984	9851	3225809	8202340	658896	47844	5259	384432	465645	3813032	11685	1656754	24328	749398	371121	22391	1374	1310764	80437	3045	1247144	7209317	415856	170158	39357074	619200	41292322
ATB-j7-exp2-liver_32	80	8196	34564	458991	27572	50143	11581	2855	241855	795776	122279	44198285	16	2976	186163	145853968	342	4363	61889	48776	2049059	39110	2886939	6761	4714621	1888974	840334	1404	3358	467478	475460	4267379	596	1273455	12391	350738	47340	6260	453	1584380	74156	3052	976273	4213524	163040	117816	39925949	394278	25578014
HIRAE-j3-exp1-liver_15	43	23766	44861	467113	14602	23461	11119	1790	338310	1095741	89955	45403166	17	4587	225185	270550579	306	3622	38832	38184	2511101	77910	4694229	7090	3312052	2761435	393619	4690	2947	337960	383982	3659350	1104	615205	21720	481892	122696	12196	85	754578	131396	2625	1427246	4173948	145921	269926	40801029	519000	13494588
BURKO-j7-exp2-liver_38	74	7731	48128	1036678	25980	26029	11388	4871	227054	1590573	119042	42452650	58	3433	238982	232485101	4093	4465	94619	60749	2427588	34473	2904483	6412	3874945	3183215	857463	2669	4796	422753	476693	4571812	1224	1025410	26028	389563	41153	13420	308	1637370	99944	3706	1012210	4946123	225627	162028	44001807	375975	20741829
Nacl-j7-exp2-liver_26	119	3125	26699	1353247	14110	13446	9631	3016	134391	1664878	59396	21060529	15	2912	202255	242572633	3545	3224	21167	24865	1222278	25326	2836529	6179	4048404	3036207	937005	2046	3177	394141	463769	3328733	705	1212319	18115	517511	6196	11246	418	1773020	50844	2401	403853	2988959	210060	38549	29851498	355406	9073715
FRAGILIS-j14-exp1-liver_76	471	24798	43637	1046321	23801	33632	15331	3234	210727	840094	129807	42103471	8	6015	266468	247214205	13735	3952	30584	32120	1988413	62709	4277142	7855	3362928	4271230	686406	16921	6313	436131	470555	3574340	4288	1497032	23558	594928	189951	17127	3996	1323913	95462	2040	1358397	6125372	251070	198186	38476555	540875	21677053
ATB-j7-exp2-liver_35	149	6587	31888	453025	27662	25931	9210	2226	239402	910452	135971	48155178	13	3458	169965	245585807	578	4105	214355	89792	1830777	37014	3746152	6335	4033231	3096193	620084	5937	3544	433141	462111	4425117	4513	1214594	18233	411546	43126	10072	372	1201680	87321	5908	880709	4943857	205549	132996	42535330	448824	26696277
FRAGILIS-j7-exp1-liver_54	59	24330	44594	555201	16808	43716	11145	4293	346954	572617	119918	37348515	20	5152	213940	176582966	4126	3594	46943	33313	1764606	60866	3259344	7528	3403214	3785349	612110	7179	3400	344024	387329	3501218	3243	933252	18770	378046	83062	10922	596	1183820	87413	1219	1129895	4318338	206859	231283	38992948	922862	21451064
BURKO-j3-exp2-liver_14	444	7263	33704	1099602	46858	31797	11637	2102	188669	1456770	200543	53476340	14	6729	142655	198970831	960	4193	32857	43576	2747956	44594	4275382	7019	3798938	2575967	715036	17826	6333	487851	515279	4434281	20221	1227097	14142	426322	32510	15016	605	1339864	97794	3716	1384317	7697969	262619	428808	43297042	649439	43452979
FRAGILIS-j3-exp1-liver_22	23	12498	26401	878593	24951	23923	11493	1796	199201	966797	105793	26042381	45	4553	233299	131902693	2326	3646	23557	15056	1682678	40598	2607831	8418	3783917	2114614	885146	4263	3209	601366	622993	3234568	547	1060849	14840	249142	78629	11340	193	1692524	63560	3338	462256	3275619	222882	96066	33366502	204543	17775049
BARNECIELA-j7-exp1-liver_58	46	23165	35596	810510	15213	24572	10321	2197	308509	868630	155680	44176401	22	5100	213017	202048839	623	3829	36407	26272	1826643	47767	5651778	6363	3624372	3629482	681541	617	3177	336361	415277	3412161	252	965561	19768	523994	68037	12058	265	1314080	77598	2788	805671	5157634	221278	131980	36672715	526288	25747162
MITSUAKI-j3-exp2-liver_20	64	11465	31027	1113809	32937	72875	10637	2879	304819	1100639	151411	53941981	15	9439	318522	175096235	560	4391	43854	72606	3120364	57798	3473392	9149	4101979	3114439	917331	25102	6067	442277	466321	4690409	1661	837694	13709	651495	42249	12748	85	1706479	106035	3615	1880087	4695056	439961	552404	45748513	605792	32776447
Nacl-j3-exp1-liver_3	65	12341	54973	1026997	16810	21291	13835	1651	263816	1728875	99568	29386388	11	3725	236899	207828572	3671	3917	37466	32607	1794955	48778	2455814	7351	4422402	4136345	1338374	3166	4535	377062	478427	3449282	1377	631255	20469	401432	134239	13351	352	2611861	91794	3288	961466	3458823	254733	130694	37549485	559966	13277259
BURKO-j7-exp2-liver_42	89	8681	36945	1058335	27853	30425	11007	2234	293642	1361673	192129	67026014	33	3130	189023	279362841	1963	4489	29705	43679	2434301	29370	4198310	8835	5021468	4186520	752589	2910	3161	386047	455001	4519336	1361	1336880	32083	709258	58656	16164	448	1412625	101045	6202	949282	4210415	258304	165485	42893136	495179	38315950
ATB-j14-exp1-liver_65	32	17041	42754	522694	23650	26365	9827	3196	248779	1030610	173450	34979296	31	4947	168987	154320752	383	3801	30492	31154	1928034	43919	3373953	6858	3447770	2843033	505718	5713	3760	407846	396384	3540579	377	924594	15275	446222	130161	10255	180	986364	66143	3010	917549	3709920	222537	156498	37258408	493074	34688594
ATB-j14-exp2-liver_50	43	5953	52432	310988	21702	77034	9308	1909	227094	607204	101183	38230704	81	2577	166899	174945126	489	3961	28399	37470	2057317	35135	3352868	6290	3742422	2033474	598957	2206	3202	331797	419975	4327438	555	1588928	18016	352670	16837	12448	393	1236971	54559	1868	770158	4497568	131215	120857	41319786	813746	20661599
Nacl-j7-exp1-liver_33	1042	25335	23215	811154	24129	17295	12228	2039	261321	1019599	105854	29356897	115	3921	263293	176163832	5914	3222	22516	21053	1553453	44544	3647129	8620	3816384	3060401	694312	11813	2779	517179	503909	3323691	7118	1100757	24023	427680	121392	13910	630	1387718	55431	2124	471918	4006567	230201	66496	34406421	314917	17397523
ATB-j3-exp1-liver_9	68	16888	27249	351568	16331	55936	10887	1806	243757	457135	92247	22473841	45	6269	178142	92788820	142	3152	34208	27553	1396273	40850	1567772	8588	3307201	1820089	497195	1443	2583	308785	350783	2921063	689	579698	9281	455214	18354	9597	198	988090	45324	1605	1061448	2391974	129501	273986	35455788	726239	15873879
MITSUAKI-j7-exp2-liver_44	777	10896	49399	801608	17362	47087	11493	1926	273317	737829	93813	37741646	1050	3839	206762	139572955	13277	3946	22746	53647	1731735	39202	2538287	7890	3440364	2869659	688534	48507	4643	333841	433976	4105724	19020	939729	13949	443847	24131	9972	921	1466039	78457	2793	1315466	3655874	198718	191688	45243414	616588	15560461
HIRAE-j7-exp1-liver_43	1803	35589	42836	687127	34429	107192	9895	2759	358446	854344	189026	39566269	15	7324	263299	244333858	3571	4004	32524	28028	2090821	68191	5521823	7001	2929199	3954447	450742	38523	3099	423226	462734	3806805	12255	1861305	26366	710809	163350	11457	215	862283	70413	1181	1249739	8439332	273711	178649	39421451	817187	37399437
ATB-j14-exp2-liver_51	43	6024	22071	482612	36574	50144	10261	787	179443	805880	115871	38076513	9	2982	149237	129610375	162	3821	42790	46113	1847801	20396	2589826	7061	4088963	2093570	677559	1158	2819	357810	394539	4087416	296	1949832	12108	518450	19976	5965	370	1417919	55680	2854	569973	3375397	124409	77255	37293456	375090	21949343
Nacl-j3-exp1-liver_5	643	17269	41809	1023518	21959	27063	11932	3264	279315	970661	101327	31804370	812	4297	279743	159189544	10127	3728	29005	24452	2204828	53586	3221557	7458	3355028	5196592	1350284	16924	2897	436985	479601	3686885	7730	977112	29927	518595	209722	14016	429	2621363	64112	2440	758341	3750539	281354	120891	36330373	549415	14615064
BURKO-j14-exp2-liver_56	46	6690	37302	1204452	31434	17325	8477	2506	180311	1351262	107023	36671331	31	2826	186594	221545221	265	4068	57600	40088	1498904	29545	2766466	7079	4223722	1909865	855789	2318	3740	365814	419259	4008953	1328	1209754	21966	481487	33135	10276	325	1761584	79247	2975	833899	4298240	179757	106730	40164340	637374	21387617
FRAGILIS-j14-exp1-liver_73	169	16504	27556	933319	17286	27520	11328	2039	220122	715458	92129	26913540	17	3769	238828	188702368	6112	3552	24443	22638	1423851	39993	2281034	7860	3860663	3174914	622941	3462	2357	477287	497097	3478501	1641	1196577	18672	328271	122392	10326	692	1161452	58360	1374	514926	2518923	188951	78455	36838732	1236405	15689270
Nacl-j3-exp2-liver_4	474	6936	43761	962062	15942	25850	12478	3576	274090	1239995	94876	42114074	1830	3222	204970	206643743	14932	3981	41782	42393	2039560	44968	3877631	7541	3845340	4414194	793708	36991	2751	358825	466429	4114828	10809	993133	20073	395215	39049	14022	876	1516770	87042	5043	768038	3483452	281197	125678	41386673	715823	16405805
MITSUAKI-j14-exp2-liver_62	30	10668	36335	983440	40487	62063	12029	1364	245370	715603	134353	47238192	67	3182	241029	156694942	4439	4050	91228	58304	1949751	27547	3342895	6888	4161885	2618638	763125	2382	3194	376307	440509	4156737	1506	2003403	14023	526123	66415	11462	171	1593819	66889	2410	1089001	4673074	142776	117494	41452331	660796	25697154
FRAGILIS-j14-exp1-liver_78	155	32027	39917	863765	25427	51947	13938	1651	286703	653839	162894	47085579	15	5503	236537	184152801	12610	3929	29478	32996	1543377	59730	3433904	7440	2871648	2771932	514877	9942	3782	340082	433258	3553165	3503	1458020	20068	396449	129496	11324	1461	969827	72362	2115	864754	4725322	202093	124024	37083403	1039162	30054286
ATB-j3-exp2-liver_11	37	7334	44538	625781	26585	48615	12334	1885	316161	1062275	108820	48750112	60	3118	185492	195267006	658	4418	47119	76310	2643546	43760	3172727	8218	3992387	2913780	623468	11965	4106	472449	474660	4341500	977	859339	12127	453284	16476	8651	428	1159358	118409	2364	1648555	4064637	222388	486563	46404946	640130	22288324
BURKO-j7-exp2-liver_37	114	6314	59766	746233	16741	31807	11919	3523	239568	1376727	121931	39713938	19	2732	198398	206648814	6101	4146	49005	54090	1723373	27929	2857730	6217	3459447	3512838	702636	1846	3688	358087	427978	4343669	403	810574	25985	330456	14153	14441	501	1297809	85715	3859	892329	4487463	200678	132951	42262953	486662	19637010
FRAGILIS-j7-exp1-liver_51	351	32091	31972	1029880	15558	93671	11110	1920	381580	638635	173096	37144068	17	4620	352801	176016559	27218	4454	28149	34397	2814911	58675	3462326	8189	2872384	5698952	564069	20723	3064	345154	423891	3919297	5591	1372792	20485	474028	350110	10588	764	1071387	57563	3370	1078226	2480139	393446	220604	38893394	1221038	34344817
ATB-j7-exp2-liver_36	56	7192	32205	461735	29086	72120	9686	3671	223509	769426	122662	48466645	23	3293	180604	157721610	3844	4152	26180	50641	1967034	36426	2913922	6287	4166652	2190502	700063	6435	3141	387559	435797	4005436	1678	1061227	12776	338229	14709	8899	280	1349162	60932	2387	1235165	4196477	162930	228832	42978171	995504	23898231
Nacl-j3-exp1-liver_2	189	27161	30186	976979	35528	25622	13352	2912	232984	987559	168900	40602690	26	3365	307541	237446878	7785	3859	36348	29151	2309971	45838	7624249	10023	9523353	4811878	631120	2890	2643	380853	463438	3733902	1759	1609344	30321	700947	217078	17067	354	1250849	76874	2807	628007	8769780	270238	78012	34917108	812698	28251165
Nacl-j7-exp2-liver_25	160	7052	51530	1403833	13441	15860	9978	3579	234306	1390223	64960	30391385	64	2514	190407	205309037	6756	3669	46869	45708	1561476	29563	1944936	6064	3831058	3854221	817788	4345	4879	384902	452757	3899291	988	555376	18125	291171	15007	10180	485	1549853	73811	3941	759485	2643598	289360	165336	41533830	328217	8847064
FRAGILIS-j3-exp1-liver_23	16	21516	27616	783985	17592	19824	12452	2435	247218	1561038	126756	35711703	37	8436	206547	186424822	1702	3740	32658	33071	1705047	46212	3029173	7867	3446176	2169548	585817	5577	3626	419488	476861	3402419	424	591026	21393	377622	98860	14990	70	1117272	74545	3192	956286	3265476	348234	175343	36079037	859346	23141540
BURKO-j3-exp2-liver_13	459	7899	40688	1102568	27204	28393	10538	2254	263694	1665964	107671	48588022	38	7966	213987	224569194	1796	4960	29124	52310	2920637	55703	3559016	9579	4442526	1713702	830866	18960	5848	503547	512130	4584421	13719	737495	15205	525247	27800	12619	686	1528860	99277	4296	1581791	6270846	253691	396129	41700947	1053541	20595577
HIRAE-j14-exp1-liver_72	462	18893	27943	826882	14282	20867	11821	2015	290676	778451	105706	33653705	40	4949	295973	189164482	34022	3273	25280	29051	1503374	53679	3102704	7706	3858661	4207095	533861	32750	2945	466317	449115	3362591	5461	751934	17391	427010	161883	10682	2827	1011695	64304	7999	934533	4081837	214336	142186	37403985	557119	16401500
Nacl-j3-exp2-liver_1	699	7777	33451	758775	27176	71545	11045	1872	227365	729158	153658	54239719	745	2405	242739	144017383	20380	4096	22905	40649	1930567	32307	3607340	6778	4104023	2680047	812448	12131	2748	346615	464353	4113321	7129	1968984	15071	309004	36918	11606	931	1531678	62505	1934	985655	3743347	177611	142992	41653302	780689	34599487
ATB-j7-exp1-liver_37	50	19637	47356	405223	22743	40514	15864	1293	364734	1340172	101157	43599343	30	4717	225019	179835427	404	4802	48104	55744	3175322	74421	4432221	10232	3506057	2876618	585203	2245	4425	325181	363692	4327877	669	1393636	23121	398658	141662	11075	65	1138337	116134	2250	1466380	7630454	162827	257761	41080650	677931	15047663
ATB-j3-exp2-liver_7	46	8138	39847	574550	34324	29625	11310	2230	247279	1344151	95429	52602229	17	2604	233237	197818549	553	5000	38579	66204	3439141	59515	4606826	8064	4481759	2037604	701221	5361	3764	362080	413054	4823009	773	1128627	21380	423218	34890	9724	276	1321982	98445	2805	1443327	8345149	140910	368915	44180542	1131381	14050946
FRAGILIS-j3-exp1-liver_19	43	19216	58111	1129881	21842	25442	11705	2731	297905	2691155	131596	32817125	51	6185	172608	235586408	909	4118	42440	39437	2253717	47215	3058770	10844	4942832	4395133	500807	5303	5832	581087	552871	3894794	533	990355	31728	547030	116028	12510	220	956991	91223	4354	1058658	4133932	464304	212207	37940642	214674	22349481
MITSUAKI-j3-exp2-liver_19	69	5522	32279	826939	26403	17060	12167	4432	166589	896452	85207	36194605	35	3353	213749	214163719	2327	4339	72313	45023	1640139	30079	3057322	8246	4988251	2126679	1031545	1825	4256	547842	567409	3915292	1371	1116426	13782	268009	35160	9370	507	1961129	71667	1911	621553	5757764	131674	73569	38389786	716910	12813608
ATB-j14-exp1-liver_63	48	15841	38826	563560	42645	65985	13668	2455	237618	771366	176392	35054998	5	5777	235865	156253377	266	3898	29726	31614	1963357	30970	3160468	7605	4110622	2781221	695285	2583	3210	369431	462435	3726165	186	1509572	16917	368866	164193	9899	94	1285591	70008	2652	1088376	4727890	183940	149582	36489627	780594	34429136
ATB-j7-exp1-liver_38	71	15325	48387	583896	26217	36377	12263	1616	281111	1010408	132967	37496987	16	3524	223612	189375034	63	3693	35854	42701	2353929	37597	3543346	7439	4603039	2784122	479303	1365	4474	319843	378735	3940812	215	1387122	16864	389905	98281	8914	271	917847	82406	2264	1134757	5415649	208469	199057	38498337	698992	24070503
ATB-j7-exp2-liver_31	40	8022	46816	470410	28683	43642	10074	2744	257047	1041333	168971	59782584	40	2746	167297	196393142	397	4192	90338	68588	2270261	24448	6365863	8156	4480237	2522700	695019	2988	3290	471510	492364	4322547	566	1402946	12574	288342	21168	10189	448	1321662	81839	4406	1248039	7772462	194097	216820	42751574	568015	38955767
BARNECIELA-j7-exp1-liver_55	53	21145	33572	1015628	29382	37652	13173	3332	301545	923196	195640	44021929	18	4042	236946	202091947	1422	3917	42134	39145	2148551	43466	4879711	6965	2965450	3578381	495884	1239	2107	319969	400013	3693019	312	1088786	20303	460569	148031	12671	50	907214	93843	3236	1105323	5006464	277687	157239	37633052	632622	39083456
BURKO-j14-exp2-liver_55	29	7157	39701	1087957	22002	25625	10742	1823	235346	1396392	94265	34916892	46	3092	206782	157104454	607	4179	38007	48734	1952000	30607	3299788	6985	3191947	2780979	717783	8141	3978	337533	428335	4320760	2866	1260408	18757	401246	21687	10973	245	1503435	69152	3976	793729	5520684	243388	95464	39400060	525292	16981962
BARNECIELA-j3-exp1-liver_28	52	14545	33067	712897	14612	17943	11139	1393	218744	1352799	96366	30993530	32	5011	174700	179236350	199	3431	27637	28642	1395079	44655	2799628	16494	2965097	1979076	855879	2535	4209	489913	524634	3290363	261	829876	21580	351915	92727	9162	102	1666538	75557	2424	743285	3082262	225935	119105	36622991	294667	15944549
Nacl-j3-exp2-liver_6	21	10440	38824	651879	35524	89084	12783	1622	260617	864050	139782	53705120	34	4100	201455	148748098	605	4340	43683	61799	3379684	44569	3392821	8691	4243528	2749798	2124432	7398	5520	370875	449815	4420975	709	816625	12223	562612	18602	9288	557	3876934	85062	3561	2139403	4781735	182583	658306	44609971	1534993	30111331
Nacl-j7-exp1-liver_34	447	10168	26306	638847	20390	16315	12818	2053	207005	910223	75228	24472093	23	4208	254210	170516251	11148	3072	20814	19893	1380275	25786	3026503	6765	3055154	2943920	1549108	5522	3010	396492	432565	3321175	3162	1059473	20789	286359	80335	10183	293	2990148	57267	1279	549103	5080912	156899	49537	33171959	457677	9704890
ATB-j14-exp2-liver_54	11	6754	34431	416591	20510	83301	10382	1433	241451	704866	116090	43456559	25	3302	179549	152607972	539	4209	31282	56766	1915908	45936	2604663	6342	4069570	2665198	574747	6240	3489	326131	406592	4048039	1000	1130279	11118	445692	31286	7705	347	1199579	71747	4188	885349	3081003	144565	202952	42504003	759925	24630697
Nacl-j3-exp1-liver_4	2417	17327	45655	720268	16241	33702	13146	1453	295937	813140	97339	31111647	79	3810	241181	262681926	15682	3339	27792	31258	1821749	43843	3854922	7663	3363072	4477879	589037	36381	2540	376876	452734	3665769	25477	752247	27818	715096	162329	13063	898	1150297	67218	2530	921376	4395549	315379	157889	37660673	600442	14045433
MITSUAKI-j14-exp2-liver_61	86	9214	53147	1188484	23383	60946	10940	1863	272002	1129839	157071	51546512	28	8966	169296	180944847	1956	4215	37485	63881	2847742	55344	3702279	7003	4006276	3746498	638317	36736	5217	352698	431977	4317340	1518	831114	15788	618904	35111	11516	421	1285050	139715	2826	1783330	4865662	490081	587280	42425514	517434	32998252
MITSUAKI-j3-exp2-liver_23	256	7398	31854	710328	15947	39036	10575	3732	305573	1001098	109780	46364255	7	5330	178299	186905961	453	4613	28041	58638	2366061	52439	3144930	7856	4396223	2738393	2445225	20215	4429	424429	410690	4245778	3658	446166	15020	393614	33624	10249	385	4520374	97243	2955	1467422	3328956	267994	634226	44774523	706489	23539998
BARNECIELA-j7-exp1-liver_59	97	18356	58952	1195085	16785	29303	10946	3240	347777	2020648	118788	32883425	11	5047	199480	271542022	225	3904	33039	46077	1982650	53175	3457548	7041	3434119	4860955	454282	3706	3224	329413	368799	3603911	971	777894	29690	714650	108212	10936	121	887409	103166	4754	1231281	4299073	351316	255675	39909142	563516	18083712
BURKO-j14-exp2-liver_60	35	9049	54878	910176	27176	29614	9849	2489	249519	576508	146502	50664900	56	3701	199505	228146848	514	3616	34872	57175	1936301	44432	2959670	7100	3524321	3981748	506095	8298	3528	376050	455683	4168348	1538	498901	10668	561607	15331	12571	269	1048363	104643	2672	1617981	5443221	242473	430966	46351798	1434961	27942151
HIRAE-j7-exp1-liver_46	5052	18174	30371	642786	19477	67479	10343	1726	267410	505440	124281	30222957	2398	5058	276013	140030853	13572	3391	18348	26046	1596709	43048	2671450	6007	3189326	3971893	410771	206215	2885	310898	356802	3274811	25044	981897	12596	352555	84840	9319	632	814750	48087	1325	865978	3084861	245590	180741	35131412	540836	21606991
MITSUAKI-j7-exp2-liver_48	814	10862	55279	733432	30302	77217	12124	2378	327181	751324	158415	61781798	18	3540	238814	194163469	12144	4466	31303	66455	1823951	47334	4067574	7030	2970246	2969663	726121	40455	3904	336096	433427	4403094	12504	1138586	14216	447125	30730	11180	3214	1473433	99832	2687	1187709	5654145	231264	238482	45274829	940787	35779468
HIRAE-j3-exp1-liver_16	32	15675	23053	314739	11103	46572	7519	2492	210844	494014	72529	24567588	14	5285	133392	111498666	225	2715	17533	24405	1336694	29536	2119333	4079	2693187	1705977	412660	3055	2773	363996	369440	2783334	524	599034	10317	251788	30464	7496	141	805969	60463	1403	729514	2374302	144809	161375	34202212	295024	12462945
BURKO-j7-exp2-liver_41	49	10430	54845	1147638	30299	32882	14006	2394	287156	1293910	172133	54093820	59	3123	214198	202021680	7220	4761	39865	50733	2412482	37421	3943383	8249	3927491	4498820	821577	4306	3297	404741	468795	5013438	1030	1393208	23259	404017	62174	14305	421	1434633	93244	4871	1160868	4271646	247278	210509	43512253	551726	35127731
BARNECIELA-j3-exp1-liver_29	44	15778	38205	604617	13637	22792	10198	2339	245886	970199	97809	34560946	83	5749	169211	167968765	138	3713	27353	29425	1445408	52382	2449046	5917	2922808	2744213	564909	2672	3936	323070	352989	3463682	472	731835	20718	390607	72653	9247	83	1122465	77119	3035	757475	2594813	192797	179017	37325066	485806	16239337
Nacl-j7-exp2-liver_30	473	5997	40203	735851	23468	43286	9403	1787	195249	604217	91723	34086718	21	2926	187936	187438405	8612	3526	26139	46385	1587870	26754	3387501	7311	4101692	2333800	744921	11304	3732	410584	465004	3739749	9085	1491371	13926	276864	9960	11084	894	1415384	70066	1612	799398	5356194	141397	165847	41743679	556405	15884157
HIRAE-j3-exp1-liver_13	13	19272	66703	658120	14294	23151	12769	2161	350458	1906784	86551	32092019	15	6537	201284	216936260	400	3680	35264	47904	2041181	51667	2962613	5639	3961358	3814668	463272	3608	3890	433532	432452	3758906	550	273388	23505	489970	109467	10920	230	889580	116764	3776	1344486	2945269	257167	323915	40687106	602639	14064283
MITSUAKI-j7-exp2-liver_43	1252	7340	41058	606185	18171	26675	13598	1837	254095	849871	100040	39276685	3853	3353	140801	198616029	55717	4667	25146	37104	1527101	48902	3184227	6516	2937684	3832582	924777	76653	3357	331691	482059	4176560	27333	926789	16216	376762	13210	9931	2183	1771617	66077	3903	649034	3691064	215295	96760	38036683	463657	18580188
HIRAE-j14-exp1-liver_69	149	19728	34097	967772	20121	23826	11940	2502	253037	520031	92237	29947551	930	5398	217515	194522902	7535	4547	31527	30998	1483992	37017	3197245	5610	3280369	4156484	484609	31344	3586	379668	368002	3609386	7737	1144116	19244	379896	230223	10713	789	932297	59775	2001	644289	4429761	184630	96065	37744312	624976	12421164
ATB-j14-exp2-liver_49	18	7544	52633	675435	25037	68585	10216	2210	250403	928412	136255	53353664	20	3194	250049	130385637	346	4942	30818	52701	2267253	29948	3681074	10952	3374331	2820072	431558	2646	3586	347676	429450	5106931	216	736130	18189	441687	18613	11367	227	871207	76062	1864	941313	4363058	173442	185830	40547989	474851	29763892
BARNECIELA-j14-exp1-liver_80	130	21280	31243	774850	52356	72487	11847	1575	234505	787031	168195	35604795	28	4574	209181	125196091	2124	4115	26645	31810	2097378	37450	2300862	5236	2493497	2196436	407380	3522	4139	298461	391184	3658277	1859	540455	10503	397916	175587	9724	553	780929	54248	1683	1692807	4628119	199476	260077	36315326	478180	31485443
BURKO-j3-exp2-liver_17	57	5443	4257	661592	7381	13136	14114	304	187605	4931877	79720	14159627	29	3003	157221	81011397	132	1779	14542	25865	841775	21670	1098057	4892	4167293	308659	5572847	1405	2311	490786	489361	1636791	1480	1103379	223378	108745920	3594	6803	524	10100594	41125	152	462819	2046458	222561	23452	2077273	500756	8716001
BARNECIELA-j14-exp1-liver_83	14	23985	29979	746201	11955	17750	9332	2066	231058	912725	121362	34415875	11	4327	147803	160823281	2429	3809	19702	26501	1542618	46356	3391683	5886	2928588	2517588	360477	10628	3951	266022	350906	3229872	2016	730886	12874	374903	112997	9765	221	704550	63476	1573	796012	3447023	168451	119714	33958911	283406	20994729
MITSUAKI-j14-exp2-liver_66	44	8643	41831	789286	29166	26117	11271	3558	277116	926199	181899	58599356	19	2506	171278	195047488	4677	4462	88263	61270	2073898	36254	4020162	7497	3414808	3305368	596025	3462	2461	365837	440523	4587873	1901	1133900	16185	530049	15532	12061	428	1253883	76098	3674	1030090	3916552	186786	175917	43397367	489194	38394034
ATB-j3-exp1-liver_10	19	17727	52844	488774	20060	45205	11361	1837	311741	1307729	133967	33595555	22	7636	175715	156324509	410	4358	38068	45660	2544425	66158	2611168	7351	2597237	2992141	526090	4350	4576	352307	413128	3877287	406	566420	15228	346717	98150	7761	102	987384	88291	2760	1582081	3554501	252509	318159	39783004	428190	23207871
HIRAE-j3-exp1-liver_14	43	12156	40132	565194	8127	16792	11746	2360	272401	1110014	59195	23323317	11	4635	161332	126783524	209	3555	20302	32990	1629522	35002	2317530	6281	4423863	2001973	898167	1334	2809	368314	405154	3425183	404	381488	14251	245507	60558	8244	148	1827317	69005	2408	691959	2102092	158806	130025	35728561	386427	8289217
FRAGILIS-j14-exp1-liver_77	344	20115	55613	882744	23505	51165	11317	1517	273219	719647	159050	33019348	17	5174	185450	140144577	31450	3905	20047	34432	1860218	55742	2908927	5817	2313254	5141006	393196	26351	2388	308517	370348	3544420	3803	1140234	20249	351918	120786	11789	584	805193	62753	1562	1038106	3739416	264234	168312	37049786	778918	29102869
ATB-j7-exp1-liver_40	26	17055	24353	328299	14720	99541	9465	1664	275396	439078	72302	24206932	15	4815	198872	102945944	269	3768	23189	31672	1854993	37623	1498248	5465	3067742	1916448	398389	2151	2738	318202	355655	3392720	563	740218	11293	300796	63663	5725	101	867983	61045	939	729010	2441850	125782	133534	35219091	447859	9977144
Nacl-j3-exp1-liver_6	501	18589	45792	908352	19431	22795	12763	2095	269739	1187507	102898	32128498	916	3574	189421	197863147	15533	4521	22765	33678	1964854	62287	3634164	6934	2787167	4104676	491602	24642	2403	326561	362030	3642636	7454	740916	22345	589815	158047	11930	895	1018215	74047	3215	798536	3666435	282547	116080	34866081	478770	16581488
ATB-j7-exp1-liver_42	5	18204	37781	639197	11171	24766	10939	3146	307109	1092175	118080	37029728	20	10310	217607	145154059	1808	3852	33417	41784	1733299	48583	2512825	5707	2469680	2774656	787944	19261	4573	302642	331178	3564847	931	387425	14192	298620	104356	8639	139	1664612	90214	1663	1406801	2466514	357842	363420	38934566	762632	20874361
HIRAE-j14-exp1-liver_68	2322	12592	30396	663260	14881	39253	10083	1307	253297	540857	88306	16273466	93126	5255	210152	112698296	14132	4018	18048	23845	1394159	30223	1357215	7814	3575974	2375593	399202	3400404	1468	386515	347237	3048596	71732	1074231	14400	249040	187256	5743	8786	844675	35296	1201	447074	1818489	286157	79776	31886986	958537	15123491
ATB-j3-exp1-liver_8	52	12842	40254	437358	9118	23741	9751	1699	270933	971832	66527	21339528	57	7431	174194	138388616	138	3600	32054	40284	1677807	43660	1791088	5167	2975765	2201405	469088	4130	3556	309499	351818	3387353	580	308584	16484	419531	70194	5609	124	1000919	74420	1568	950252	2676529	157183	209252	36952443	822913	9077549
HIRAE-j7-exp1-liver_44	328	19604	26946	545213	27377	56900	9480	2634	233864	441007	118811	24647490	19	5216	198341	138371643	6988	3413	20895	25386	1493441	32191	2361437	5157	2919399	2520501	352292	9412	3342	321052	390400	3226249	3033	1108981	11757	324496	111001	7368	188	739106	43184	716	791370	3742780	195086	151009	33878865	425520	21482226
FRAGILIS-j3-exp1-liver_20	58	14962	37830	2245521	26644	24197	11679	1121	306699	2494328	106085	25226359	31	5296	194873	217399620	1792	4042	44189	38296	1795837	64226	2578201	5910	3595832	5078278	599670	37102	3210	465251	443276	3670255	912	976523	28316	326144	138120	10304	205	1255955	75415	4361	637523	3653919	631498	82836	33282200	282519	17076390
BARNECIELA-j7-exp1-liver_56	173	16137	46462	721406	13369	72621	11056	3537	315680	589397	79118	24679234	18	5109	181431	119172808	10253	4140	28585	30463	1737226	38181	2406111	5765	3201545	2339454	563956	12908	2894	334351	373175	3834269	3341	911130	14308	243358	98086	7619	606	1070521	59499	728	700796	2623554	147212	117393	35540450	1523054	13190708
Nacl-j7-exp1-liver_36	450	18802	26387	683304	16705	30778	9751	2605	196425	624417	102506	32715199	55	4735	202002	155278314	6471	4068	20675	24493	1216312	28969	2524042	9858	2842907	2590223	492152	3014	2680	378833	368779	3606610	3197	1212519	20498	364967	64170	8282	273	1055613	58016	2295	502908	2951239	220962	68407	33987598	324672	16278286
FRAGILIS-j3-exp1-liver_24	21	12614	34760	589557	9506	19648	10220	1958	166783	1106774	58505	17917003	41	5198	127335	138492194	243	3299	19384	27623	1092432	36634	1708446	5340	2835186	1799326	824103	3193	2960	387097	404606	3153874	659	621234	20281	308449	39103	5804	165	1793639	53039	2088	506756	2581570	184427	90331	33657735	212237	8151484
ATB-j14-exp1-liver_66	15	19245	32335	390912	25432	27827	10982	1739	207324	854815	175777	34407396	7	4861	133257	132150062	131	3318	23429	36596	1864236	38062	2933532	5688	3391710	2974182	624404	2959	2684	351596	373825	3533987	255	1076887	14133	321570	118111	6690	80	1300871	53827	2563	791093	3028609	193188	156733	35529580	567926	34038646
BARNECIELA-j14-exp1-liver_81	92	15141	39046	721044	25717	71174	12034	2157	220385	539337	141662	34564580	78	5335	165870	117107454	1832	3802	21155	30830	1574161	26637	3129378	5824	2486578	2477884	1194516	1829	3656	273017	378652	3712857	1846	1423907	8765	233128	134381	8609	171	2506573	65388	2053	1040807	4411068	124071	138909	35846818	487108	23293879
BARNECIELA-j3-exp1-liver_30	58	19757	37861	418531	15986	20324	9473	2186	234329	970593	101651	35161769	41	4776	173358	153901589	95	3825	21487	35211	1575256	44765	2944556	5326	2779846	1902711	674501	2034	3530	382007	350305	3611156	620	586901	17003	236668	52796	5757	232	1450482	66782	1566	898317	2931744	194065	175122	36562688	292306	17366078
HIRAE-j7-exp1-liver_48	670	13835	31685	966317	28566	31710	12855	2005	305956	745612	161223	32744373	40	5028	190102	151800066	5711	4151	22217	33655	2123913	24084	3599640	6482	3072956	3378617	1064900	27713	3926	352815	371519	3967572	7780	1174766	11800	491477	185541	9586	1239	2392860	69876	3341	923083	4009022	226514	136102	36285955	347253	27543274
HIRAE-j3-exp1-liver_18	26	26213	42194	436411	20010	65946	10287	3078	339035	834230	114993	41876662	12	5288	181507	144221136	135	4685	32587	49379	2471674	77942	3620404	6032	2937101	2729300	255270	4039	3848	410123	418185	4099893	612	572293	14387	260582	98069	9018	160	535200	104943	1671	1530795	3883943	183375	348723	40080964	498057	20519112
FRAGILIS-j14-exp1-liver_74	466	19046	52084	862344	16436	24040	14198	2160	263714	855439	111329	32148396	22	5258	180121	224225996	20796	4186	26817	38942	1756251	41802	3287214	6650	2988435	4971319	545310	37595	5496	389742	420898	3832040	7518	916589	18109	414786	207239	11572	2788	1152710	83156	2426	961566	4858063	258889	111224	38485396	516780	15774075
BARNECIELA-j3-exp1-liver_26	6	17515	43157	737605	16701	26909	10610	2186	271485	1690259	95522	30651531	5	6008	161587	165672379	136	3899	25477	35598	1999545	57094	2312174	5801	2872334	2246316	355508	1540	4373	437765	422062	3979245	304	858305	30425	374874	155810	6297	117	769002	79325	3202	514484	2770747	237482	111024	36093463	186133	15155781
FRAGILIS-j7-exp1-liver_50	17	5628	2698	392945	5383	11071	12426	2352	182987	4564875	38590	9360247	20	3973	104919	45200611	97	1862	13036	51099	636094	30495	691650	3919	3470979	216575	2093822	800	2012	269932	323122	1304643	433	692818	325101	98989318	1403	3559	84	4606082	31899	141	399785	1144038	226221	18428	2555207	3129685	5491492
FRAGILIS-j7-exp1-liver_52	207	26923	40902	466178	20707	83236	7287	2459	261790	440681	132661	36906371	26	6928	108773	98827279	5660	3912	30266	36196	1529422	81772	2404292	5377	3686454	2322556	630318	31185	3632	347019	446986	3407797	5092	1291640	14425	271945	169399	7148	2382	1364428	52825	996	816815	3931220	190793	165173	45427739	214943	20153309
BARNECIELA-j7-exp1-liver_60	47	6217	14253	694378	7358	11887	7597	3787	88348	498522	50776	13949449	9	4698	129358	65437401	7421	2650	20219	14957	562780	17138	2776478	3167	2814194	1599782	1782457	7156	2012	315744	376716	2389218	2656	462118	8150	293068	18703	9318	171	3712855	23427	983	154675	1597942	92851	24652	19597912	294369	6649091
Nacl-j7-exp1-liver_32	373	13871	43526	1092062	10026	18724	10880	1687	255365	1328264	77078	23295169	12	4749	188449	190692569	7799	3803	28353	30305	1229181	34687	2283758	6106	2781003	3680136	471325	4534	3015	352168	337355	3363678	1365	509088	19493	402279	131432	10015	401	1040330	57581	2342	612017	2845646	223827	99878	33159919	596293	12353583
BARNECIELA-j14-exp1-liver_82	575	15669	38609	848173	24419	26803	10764	1594	239693	942249	138302	36288349	23	5241	207151	141970467	9410	3816	19346	28309	1722172	36147	3611793	5580	3155373	4746977	1014678	7741	3808	315261	396198	3627551	3635	1154695	12988	277428	232299	10785	656	2166689	60031	2893	756357	4329606	254593	111785	34208210	371252	21552365
ATB-j3-exp1-liver_12	38	25969	52369	487466	13926	28943	10652	1979	339875	997626	152484	45064343	45	7732	176001	214926625	305	4745	131158	64546	2740018	64528	3520485	6621	2398930	3396275	212525	5693	4738	291630	319598	3853667	1008	636367	14833	425702	110564	8537	105	467456	103773	3399	1375984	4065782	244702	320587	38676522	257671	26322293
HIRAE-j14-exp1-liver_70	702	16995	40054	624112	17014	44934	8681	2664	245948	545861	94840	34699630	45	5093	164964	114113592	31519	4389	19196	29596	1783179	72197	2182991	6792	2936601	2914041	530741	34968	3523	345601	367349	3648434	7047	887220	12307	293338	154162	5977	981	1208353	62093	14228	992875	3763017	219312	144729	41273843	477509	20308428
St_SCFA-exp2-liver_pre	NA	NA	247405	NA	NA	119092	NA	NA	NA	NA	NA	NA	NA	19167	NA	NA	NA	NA	NA	NA	NA	NA	NA	NA	NA	NA	NA	NA	206367	NA	NA	NA	NA	NA	NA	NA	NA	NA	NA	NA	NA	NA	NA	NA	NA	NA	NA	NA	NA
St_PA-exp3-liver_pre	NA	NA	NA	NA	NA	NA	NA	NA	NA	NA	NA	NA	NA	NA	NA	NA	NA	NA	NA	NA	NA	NA	NA	NA	NA	NA	NA	NA	NA	NA	NA	NA	NA	NA	NA	NA	NA	NA	NA	NA	NA	NA	NA	NA	NA	NA	NA	NA	NA
St_BA1-exp3-liver_pre	2950	NA	NA	NA	NA	NA	NA	NA	NA	NA	NA	NA	224972	NA	NA	NA	3669	NA	NA	NA	NA	NA	NA	NA	NA	NA	NA	13734	NA	NA	NA	NA	218841	NA	NA	NA	NA	NA	502773	NA	NA	NA	NA	NA	NA	NA	NA	NA	NA
St_AA_exp3-liver_pre	NA	77	NA	1239	8966	NA	6548	115	68	1453207	2928	261952	NA	NA	8022	4598732	NA	45	348	633	6378	20	222842	2333	561987	2333942	10286955	NA	NA	157575	127156	696	NA	57464983	73453	124555	8546	1247	NA	18975074	1405	53	5154	1045931	1091586	1257	1089	17	384533
St_BA2-exp3-liver_pre	117428	NA	NA	NA	NA	NA	NA	NA	NA	NA	NA	NA	1065	NA	NA	NA	32266	NA	NA	NA	NA	NA	NA	NA	NA	NA	NA	1089280	NA	NA	NA	NA	5521	NA	NA	NA	NA	NA	24431	NA	NA	NA	NA	NA	NA	NA	NA	NA	NA
St_SCFA-exp2-liver_post	NA	NA	293396	NA	NA	147646	NA	NA	NA	NA	NA	NA	NA	8780	NA	NA	NA	NA	NA	NA	NA	NA	NA	NA	NA	NA	NA	NA	215703	NA	NA	NA	NA	NA	NA	NA	NA	NA	NA	NA	NA	NA	NA	NA	NA	NA	NA	NA	NA
St_PA-exp3-liver_post	NA	NA	NA	NA	NA	NA	NA	NA	NA	NA	NA	NA	NA	NA	NA	NA	NA	NA	NA	NA	NA	NA	NA	NA	NA	NA	NA	NA	NA	NA	NA	NA	NA	NA	NA	NA	NA	NA	NA	NA	NA	NA	NA	NA	NA	NA	NA	NA	NA
St_SCFA-exp3-liver_pre	NA	NA	292140	NA	NA	129812	NA	NA	NA	NA	NA	NA	NA	29401	NA	NA	NA	NA	NA	NA	NA	NA	NA	NA	NA	NA	NA	NA	214632	NA	NA	NA	NA	NA	NA	NA	NA	NA	NA	NA	NA	NA	NA	NA	NA	NA	NA	NA	NA
St_PA-exp1-liver_pre	NA	NA	NA	NA	NA	NA	NA	NA	NA	NA	NA	NA	NA	NA	NA	NA	NA	NA	NA	NA	NA	NA	NA	NA	NA	NA	NA	NA	NA	NA	NA	NA	NA	NA	NA	NA	NA	NA	NA	NA	NA	NA	NA	NA	NA	NA	NA	NA	NA
St_AA_exp3-liver_post	NA	178	NA	1429	61938	NA	7067	39	660	1765381	2465	327329	NA	NA	11589	5548596	NA	75	268	1572	16114	160	292523	2066	244177	2794220	12270445	NA	NA	160160	129427	1212	NA	88856601	117708	139822	29131	2060	NA	23558201	3775	65	7815	1742982	1220691	975	17188	61	604183
St_AA-exp1-liver_pre	NA	248	NA	2587	11143	NA	3772	246	14	1277339	1356	257947	NA	NA	3011	3730785	NA	56	517	1060	3468	114	205271	13528	3266719	1395353	5306366	NA	NA	445941	380819	1639	NA	71015465	51674	136647	205	1602	NA	10278523	529	63	8707	968338	907447	1261	4690	3	372872
St_BA2-exp3-liver_post	118042	NA	NA	NA	NA	NA	NA	NA	NA	NA	NA	NA	85	NA	NA	NA	7715	NA	NA	NA	NA	NA	NA	NA	NA	NA	NA	1012941	NA	NA	NA	NA	3561	NA	NA	NA	NA	NA	12570	NA	NA	NA	NA	NA	NA	NA	NA	NA	NA
St_BA1-exp3-liver_post	3176	NA	NA	NA	NA	NA	NA	NA	NA	NA	NA	NA	224032	NA	NA	NA	4223	NA	NA	NA	NA	NA	NA	NA	NA	NA	NA	4067	NA	NA	NA	NA	199781	NA	NA	NA	NA	NA	329205	NA	NA	NA	NA	NA	NA	NA	NA	NA	NA
St_BA1-exp2-liver_pre	3195	NA	NA	NA	NA	NA	NA	NA	NA	NA	NA	NA	207414	NA	NA	NA	3599	NA	NA	NA	NA	NA	NA	NA	NA	NA	NA	4079	NA	NA	NA	NA	181405	NA	NA	NA	NA	NA	281298	NA	NA	NA	NA	NA	NA	NA	NA	NA	NA
St_BA2-exp2-liver_pre	116116	NA	NA	NA	NA	NA	NA	NA	NA	NA	NA	NA	130	NA	NA	NA	1476	NA	NA	NA	NA	NA	NA	NA	NA	NA	NA	950571	NA	NA	NA	NA	2863	NA	NA	NA	NA	NA	10706	NA	NA	NA	NA	NA	NA	NA	NA	NA	NA
St_SCFA-exp3-liver_post	NA	NA	268965	NA	NA	119045	NA	NA	NA	NA	NA	NA	NA	14552	NA	NA	NA	NA	NA	NA	NA	NA	NA	NA	NA	NA	NA	NA	196932	NA	NA	NA	NA	NA	NA	NA	NA	NA	NA	NA	NA	NA	NA	NA	NA	NA	NA	NA	NA
St_SCFA-exp1-liver_pre	NA	NA	199194	NA	NA	121569	NA	NA	NA	NA	NA	NA	NA	25446	NA	NA	NA	NA	NA	NA	NA	NA	NA	NA	NA	NA	NA	NA	194574	NA	NA	NA	NA	NA	NA	NA	NA	NA	NA	NA	NA	NA	NA	NA	NA	NA	NA	NA	NA
St_BA2-exp2-liver_post	111422	NA	NA	NA	NA	NA	NA	NA	NA	NA	NA	NA	902	NA	NA	NA	4235	NA	NA	NA	NA	NA	NA	NA	NA	NA	NA	920583	NA	NA	NA	NA	2772	NA	NA	NA	NA	NA	13461	NA	NA	NA	NA	NA	NA	NA	NA	NA	NA
St_BA1-exp2-liver_post	2831	NA	NA	NA	NA	NA	NA	NA	NA	NA	NA	NA	210914	NA	NA	NA	4700	NA	NA	NA	NA	NA	NA	NA	NA	NA	NA	4610	NA	NA	NA	NA	177140	NA	NA	NA	NA	NA	243555	NA	NA	NA	NA	NA	NA	NA	NA	NA	NA
St_BA1-exp1-liver_pre	2607	NA	NA	NA	NA	NA	NA	NA	NA	NA	NA	NA	189153	NA	NA	NA	3680	NA	NA	NA	NA	NA	NA	NA	NA	NA	NA	2933	NA	NA	NA	NA	164548	NA	NA	NA	NA	NA	222629	NA	NA	NA	NA	NA	NA	NA	NA	NA	NA
St_BA2-exp1-liver_pre	110981	NA	NA	NA	NA	NA	NA	NA	NA	NA	NA	NA	93	NA	NA	NA	6797	NA	NA	NA	NA	NA	NA	NA	NA	NA	NA	893742	NA	NA	NA	NA	2761	NA	NA	NA	NA	NA	7985	NA	NA	NA	NA	NA	NA	NA	NA	NA	NA
St_AA-exp1-liver_post	NA	NA	NA	1602	53187	NA	4884	858	610	1285502	2128	284839	NA	NA	9063	5691990	NA	15	926	837	14283	84	205419	2066	753422	2300077	5156976	NA	NA	246530	292437	2387	NA	94168546	79772	116882	9026	853	NA	11052944	1002	51	10228	1337401	911910	1221	24040	126	400685
St_PA-exp1-liver_post	NA	NA	NA	NA	NA	NA	NA	NA	NA	NA	NA	NA	NA	NA	NA	NA	NA	NA	NA	NA	NA	NA	NA	NA	NA	NA	NA	NA	NA	NA	NA	NA	NA	NA	NA	NA	NA	NA	NA	NA	NA	NA	NA	NA	NA	NA	NA	NA	NA
St_AA_exp2-liver_pre	NA	173	NA	1941	6671	NA	4448	211	5	879936	2393	196825	NA	NA	2366	4190035	NA	11	146	724	3358	26	146742	8004	4392395	1398098	6122909	NA	NA	243938	246525	673	NA	53781023	38527	95057	439	907	NA	11975344	471	52	19543	709418	718154	150	2555	12	253718
St_PA-exp2-liver_pre	NA	NA	NA	NA	NA	NA	NA	NA	NA	NA	NA	NA	NA	NA	NA	NA	NA	NA	NA	NA	NA	NA	NA	NA	NA	NA	NA	NA	NA	NA	NA	NA	NA	NA	NA	NA	NA	NA	NA	NA	NA	NA	NA	NA	NA	NA	NA	NA	NA
St_SCFA-exp1-liver_post	NA	NA	246931	NA	NA	142474	NA	NA	NA	NA	NA	NA	NA	16689	NA	NA	NA	NA	NA	NA	NA	NA	NA	NA	NA	NA	NA	NA	206169	NA	NA	NA	NA	NA	NA	NA	NA	NA	NA	NA	NA	NA	NA	NA	NA	NA	NA	NA	NA
St_PA-exp2-liver_post	NA	NA	NA	NA	NA	NA	NA	NA	NA	NA	NA	NA	NA	NA	NA	NA	NA	NA	NA	NA	NA	NA	NA	NA	NA	NA	NA	NA	NA	NA	NA	NA	NA	NA	NA	NA	NA	NA	NA	NA	NA	NA	NA	NA	NA	NA	NA	NA	NA
St_AA_exp2-liver_post	NA	2764	NA	1499	39786	NA	5593	195	591	1116546	1326	240213	NA	NA	2355	7418135	NA	178	359	1618	16726	42	150131	1753	490368	2282215	8364534	NA	NA	138361	225598	1015	NA	96187375	22409	97273	692	612	NA	15646981	285	15	29475	1242652	933418	812	12835	26	297385
St_BA2-exp1-liver_post	107289	NA	NA	NA	NA	NA	NA	NA	NA	NA	NA	NA	663	NA	NA	NA	5614	NA	NA	NA	NA	NA	NA	NA	NA	NA	NA	873602	NA	NA	NA	NA	2682	NA	NA	NA	NA	NA	7293	NA	NA	NA	NA	NA	NA	NA	NA	NA	NA
St_BA1-exp1-liver_post	2575	NA	NA	NA	NA	NA	NA	NA	NA	NA	NA	NA	179223	NA	NA	NA	1393	NA	NA	NA	NA	NA	NA	NA	NA	NA	NA	3057	NA	NA	NA	NA	149220	NA	NA	NA	NA	NA	148775	NA	NA	NA	NA	NA	NA	NA	NA	NA	NA
[truncated: 94 more columns]

## Sheet: Height
Sid	12-dehydrocholic acid@5.28-ba	2-aminoadipic acid@15.22-gc	2-hydroxybutyric acid@2.50-sf	2-hydroxyglutaric acid@12.99-gc	2-oxoglutaric acid@13.00-gc	3-hydroxybutyric acid@1.66-sf	3-hydroxyisovaleric acid@7.82-gc	3-methylhistidine@16.86-gc	4-hydroxymandelic acid@15.21-gc	4-hydroxyproline@12.43-gc	5-aminovaleric acid@13.51-gc	5-oxoproline@12.34-gc	7,12-dihydroxy-3-oxocholanoic acid@7.06-ba	Acetic acid@1.80-sf	Adenine@16.17-gc	Alanine@6.92-gc	Alpha-muricholic acid@5.88-ba	Alpha-tocopherol@29.51-gc	Arabinose@14.16-gc	Arabitol@14.80-gc	Arachidonic acid@23.72-gc	Asparagine@14.11-gc	Aspartic acid@12.36-gc	Behenic acid@26.39-gc	Benzoic acid@8.76-gc	Beta-alanine@11.15-gc	Beta-hydroxypyruvic acid@5.43-gc	Beta-muricholic acid@6.15-ba	Butanoic acid@5.31-sf	Capric acid@11.44-gc	Caprylic acid@8.95-gc	Cholesterol@29.51-gc	Cholic acid@9.07-ba	Citric acid;Isocitric acid@15.79-gc	Citrulline@15.76-gc	Creatine@12.79-gc	Cystine;Cysteine@22.97-gc	Cytosine@12.37-gc	Deoxycholic acid@10.46-ba	Dimethylglycine@5.43-gc	Erythritol@12.29-gc	Ferulic acid@19.16-gc	Fructose@16.47-gc	Fumaric acid@10.07-gc	GABA@12.43-gc	Galactitol;Sorbitol;Mannitol@17.27-gc	Galactose;Glucose;Mannose@17.00-gc	Glucose-6-phosphate;Fructose-6-phosphate@23.79-gc	Glutamic acid@13.51-gc
BlM-exp2-liver_pre	NA	NA	21	NA	NA	31	NA	NA	NA	NA	NA	NA	NA	734	NA	NA	NA	NA	NA	NA	NA	NA	NA	NA	NA	NA	NA	NA	127	NA	NA	NA	NA	NA	NA	NA	NA	NA	NA	NA	NA	NA	NA	NA	NA	NA	NA	NA	NA
BlM_exp3-liver_pre	11	73	NA	694	94	NA	2808	111	18	638	453	32500	12	NA	560	142039	94	25	135	251	5161	401	2054	959	2543392	1289	1848795	93	NA	147101	229940	227	223	14233	35	252	195	319	40	3443870	397	247	1362	10391	494	950	64	43	2819
BlM-exp2-liver_post	NA	NA	19	NA	NA	118	NA	NA	NA	NA	NA	NA	NA	319	NA	NA	NA	NA	NA	NA	NA	NA	NA	NA	NA	NA	NA	NA	107	NA	NA	NA	NA	NA	NA	NA	NA	NA	NA	NA	NA	NA	NA	NA	NA	NA	NA	NA	NA
BlM_exp3-liver_post	10	88	NA	813	132	NA	3955	278	543	789	861	63386	8	NA	2640	561625	7	254	504	366	26481	719	2470	1497	2786535	2946	1955362	22	NA	230614	282000	268	83	2349	107	447	335	632	45	3751243	735	143	3013	9320	502	1292	4905	77	9368
BlM-exp3-liver_pre	NA	NA	35	NA	NA	12	NA	NA	NA	NA	NA	NA	NA	682	NA	NA	NA	NA	NA	NA	NA	NA	NA	NA	NA	NA	NA	NA	116	NA	NA	NA	NA	NA	NA	NA	NA	NA	NA	NA	NA	NA	NA	NA	NA	NA	NA	NA	NA
Bl_matrice-exp1-liver_3a	NA	NA	NA	NA	NA	NA	NA	NA	NA	NA	NA	NA	NA	NA	NA	NA	NA	NA	NA	NA	NA	NA	NA	NA	NA	NA	NA	NA	NA	NA	NA	NA	NA	NA	NA	NA	NA	NA	NA	NA	NA	NA	NA	NA	NA	NA	NA	NA	NA
Bl_matrice-exp2-liver_pre	9	NA	NA	NA	NA	NA	NA	NA	NA	NA	NA	NA	8	NA	NA	NA	12	NA	NA	NA	NA	NA	NA	NA	NA	NA	NA	12	NA	NA	NA	NA	37	NA	NA	NA	NA	NA	63	NA	NA	NA	NA	NA	NA	NA	NA	NA	NA
BlM_exp1-liver_pre	11	42	NA	1288	120	NA	2657	98	17	444	171	50799	3	NA	159	317194	20	91	130	33	1723	611	1978	4096	2375919	2142	2408895	11	NA	246837	279388	197	69	112922	245	245	204	105	41	4386497	120	37	5061	13773	491	296	408	29	2810
BlM-exp3-liver_post	NA	NA	17	NA	NA	41	NA	NA	NA	NA	NA	NA	NA	414	NA	NA	NA	NA	NA	NA	NA	NA	NA	NA	NA	NA	NA	NA	114	NA	NA	NA	NA	NA	NA	NA	NA	NA	NA	NA	NA	NA	NA	NA	NA	NA	NA	NA	NA
BlM-exp1-liver_pre	NA	NA	21	NA	NA	27	NA	NA	NA	NA	NA	NA	NA	682	NA	NA	NA	NA	NA	NA	NA	NA	NA	NA	NA	NA	NA	NA	107	NA	NA	NA	NA	NA	NA	NA	NA	NA	NA	NA	NA	NA	NA	NA	NA	NA	NA	NA	NA
Bl_matrice-exp2-liver_post	9	NA	NA	NA	NA	NA	NA	NA	NA	NA	NA	NA	13	NA	NA	NA	66	NA	NA	NA	NA	NA	NA	NA	NA	NA	NA	11	NA	NA	NA	NA	43	NA	NA	NA	NA	NA	36	NA	NA	NA	NA	NA	NA	NA	NA	NA	NA
Bl_matrice-exp1-liver_3b	NA	NA	NA	NA	NA	NA	NA	NA	NA	NA	NA	NA	NA	NA	NA	NA	NA	NA	NA	NA	NA	NA	NA	NA	NA	NA	NA	NA	NA	NA	NA	NA	NA	NA	NA	NA	NA	NA	NA	NA	NA	NA	NA	NA	NA	NA	NA	NA	NA
BlM_pre-exp2-liver	NA	61	NA	485	61	NA	72	219	66	156	635	10648	NA	NA	181	73844	NA	142	266	208	142095	53	216	1492	192183	908	706841	NA	NA	12832	36209	588	NA	2340	63	117	382	31	NA	81718	184	33	1452	1747	54	417	840	29	940
BlM_exp2-liver_pre	NA	NA	NA	NA	NA	NA	NA	NA	NA	NA	NA	NA	NA	NA	NA	NA	NA	NA	NA	NA	NA	NA	NA	NA	NA	NA	NA	NA	NA	NA	NA	NA	NA	NA	NA	NA	NA	NA	NA	NA	NA	NA	NA	NA	NA	NA	NA	NA	NA
BlM_exp1-liver_post	4	52	NA	559	100	NA	2504	266	456	561	271	51070	4	NA	935	448658	10	68	272	441	17469	701	1375	804	1640564	2208	1986488	8	NA	172348	231465	1053	35	5087	44	1191	482	221	31	4031411	374	100	7297	7943	331	567	5096	55	4172
BlM-exp1-liver_post	NA	NA	13	NA	NA	45	NA	NA	NA	NA	NA	NA	NA	502	NA	NA	NA	NA	NA	NA	NA	NA	NA	NA	NA	NA	NA	NA	95	NA	NA	NA	NA	NA	NA	NA	NA	NA	NA	NA	NA	NA	NA	NA	NA	NA	NA	NA	NA
BlM_exp2-liver_post	NA	NA	NA	NA	NA	NA	NA	NA	NA	NA	NA	NA	NA	NA	NA	NA	NA	NA	NA	NA	NA	NA	NA	NA	NA	NA	NA	NA	NA	NA	NA	NA	NA	NA	NA	NA	NA	NA	NA	NA	NA	NA	NA	NA	NA	NA	NA	NA	NA
BlM_post-exp2-liver	NA	89	NA	355	111	NA	92	335	157	178	702	9208	NA	NA	332	151176	NA	131	233	534	8924	111	317	544	323352	1117	906344	NA	NA	23519	42084	799	NA	2209	82	154	325	3	NA	212835	372	89	1510	1705	76	361	1188	41	747
QC-exp2-liver_5a	NA	NA	8229	NA	NA	6641	NA	NA	NA	NA	NA	NA	NA	917	NA	NA	NA	NA	NA	NA	NA	NA	NA	NA	NA	NA	NA	NA	402	NA	NA	NA	NA	NA	NA	NA	NA	NA	NA	NA	NA	NA	NA	NA	NA	NA	NA	NA	NA
QC_exp3-liver_5a	29	5776	NA	503132	20247	NA	11628	1021	161641	671508	79790	16437472	8	NA	120667	151176321	416	1974	22026	19416	1174408	34225	1572212	7244	2413615	2526855	432212	1713	NA	287270	303658	1146764	609	532246	9999	364087	45762	6312	141	795719	56418	1266	677315	3487100	151805	221150	9562993	362495	12882710
QC_exp123-liver_6a	45	NA	NA	NA	NA	NA	NA	NA	NA	NA	NA	NA	13	NA	NA	NA	692	NA	NA	NA	NA	NA	NA	NA	NA	NA	NA	3995	NA	NA	NA	NA	771	NA	NA	NA	NA	NA	118	NA	NA	NA	NA	NA	NA	NA	NA	NA	NA
QC_exp3-liver_5b	30	6680	NA	572736	21979	NA	12392	1208	166752	752204	88426	17596327	3	NA	130757	134616947	430	2074	20988	23835	1090992	37655	1801337	5506	2455028	2666244	439369	1523	NA	309857	314902	1159834	659	556658	13218	398142	46679	7425	171	863066	60321	1407	716001	3498384	155459	237163	10160445	388609	13679120
QC-exp2-liver_5b	NA	NA	8235	NA	NA	6963	NA	NA	NA	NA	NA	NA	NA	818	NA	NA	NA	NA	NA	NA	NA	NA	NA	NA	NA	NA	NA	NA	442	NA	NA	NA	NA	NA	NA	NA	NA	NA	NA	NA	NA	NA	NA	NA	NA	NA	NA	NA	NA
QC-exp2-liver_5c	NA	NA	7639	NA	NA	6901	NA	NA	NA	NA	NA	NA	NA	852	NA	NA	NA	NA	NA	NA	NA	NA	NA	NA	NA	NA	NA	NA	391	NA	NA	NA	NA	NA	NA	NA	NA	NA	NA	NA	NA	NA	NA	NA	NA	NA	NA	NA	NA
QC_exp3-liver_5c	34	6942	NA	562810	21933	NA	12759	1606	173589	741908	87254	17918430	11	NA	131569	129469479	556	1717	23643	26596	1097425	38507	1850897	5515	2590664	2934501	482714	1597	NA	319160	323401	1249269	678	576192	13126	353247	52870	7563	128	901643	64686	1399	718761	3711024	168397	248085	9657753	388362	14761388
QC-exp2-liver_5d	NA	NA	6864	NA	NA	6782	NA	NA	NA	NA	NA	NA	NA	719	NA	NA	NA	NA	NA	NA	NA	NA	NA	NA	NA	NA	NA	NA	367	NA	NA	NA	NA	NA	NA	NA	NA	NA	NA	NA	NA	NA	NA	NA	NA	NA	NA	NA	NA
QC_exp3-liver_6a	NA	9462	NA	533669	21338	NA	11313	1314	160820	753330	87999	17507462	NA	NA	117308	125826111	NA	2026	24474	25021	870669	40708	1829953	4936	2389258	2695123	393642	NA	NA	291330	278675	1207148	NA	523346	12685	365314	58889	6083	NA	786273	52021	1341	693923	3468063	160404	229128	9643924	354638	13872995
QC-exp2-liver_5e	NA	NA	6942	NA	NA	6824	NA	NA	NA	NA	NA	NA	NA	657	NA	NA	NA	NA	NA	NA	NA	NA	NA	NA	NA	NA	NA	NA	369	NA	NA	NA	NA	NA	NA	NA	NA	NA	NA	NA	NA	NA	NA	NA	NA	NA	NA	NA	NA
QC_exp3-liver_6b	NA	8996	NA	544715	19420	NA	10089	1184	167088	719442	85488	17595778	NA	NA	108705	124049073	NA	2114	22739	27473	911715	38395	1819617	5102	2536234	2682008	393896	NA	NA	291885	283773	1176161	NA	511596	14881	322966	62140	6997	NA	809715	56625	1310	700564	3506271	148201	231769	10285003	357730	13914660
QC_exp3-liver_5d	18	9111	NA	575618	22592	NA	13240	1727	181664	785555	93509	19625148	6	NA	129435	125288884	501	1760	23601	37938	1416344	35792	1975700	7640	2714584	2837086	554090	1572	NA	335754	321534	1218982	705	606961	14225	273192	73495	7487	162	1095586	67230	2104	747905	3782509	171051	255832	10521260	353709	15625034
QC_exp3-liver_5e	25	NA	NA	NA	NA	NA	NA	NA	NA	NA	NA	NA	6	NA	NA	NA	468	NA	NA	NA	NA	NA	NA	NA	NA	NA	NA	1701	NA	NA	NA	NA	734	NA	NA	NA	NA	NA	121	NA	NA	NA	NA	NA	NA	NA	NA	NA	NA
QC-exp2-liver_5f	NA	NA	6931	NA	NA	7075	NA	NA	NA	NA	NA	NA	NA	650	NA	NA	NA	NA	NA	NA	NA	NA	NA	NA	NA	NA	NA	NA	376	NA	NA	NA	NA	NA	NA	NA	NA	NA	NA	NA	NA	NA	NA	NA	NA	NA	NA	NA	NA
QC_exp3-liver_6c	NA	8816	NA	573615	23215	NA	11145	949	173069	740148	94494	18441982	NA	NA	121688	124794165	NA	1911	24083	30796	1144246	35928	1888462	5435	2652652	2733900	415429	NA	NA	300794	291603	1181684	NA	505929	12558	303608	72811	6308	NA	822982	58617	1472	705011	3521834	155673	234976	10368894	351343	14508108
QC_exp3-liver_5f	40	NA	NA	NA	NA	NA	NA	NA	NA	NA	NA	NA	8	NA	NA	NA	460	NA	NA	NA	NA	NA	NA	NA	NA	NA	NA	1575	NA	NA	NA	NA	687	NA	NA	NA	NA	NA	125	NA	NA	NA	NA	NA	NA	NA	NA	NA	NA
QC-exp2-liver_5g	NA	NA	7174	NA	NA	7234	NA	NA	NA	NA	NA	NA	NA	666	NA	NA	NA	NA	NA	NA	NA	NA	NA	NA	NA	NA	NA	NA	379	NA	NA	NA	NA	NA	NA	NA	NA	NA	NA	NA	NA	NA	NA	NA	NA	NA	NA	NA	NA
QC_exp3-liver_5g	16	NA	NA	NA	NA	NA	NA	NA	NA	NA	NA	NA	6	NA	NA	NA	456	NA	NA	NA	NA	NA	NA	NA	NA	NA	NA	608	NA	NA	NA	NA	279	NA	NA	NA	NA	NA	74	NA	NA	NA	NA	NA	NA	NA	NA	NA	NA
QC_exp123-liver_6b	12	NA	NA	NA	NA	NA	NA	NA	NA	NA	NA	NA	9	NA	NA	NA	678	NA	NA	NA	NA	NA	NA	NA	NA	NA	NA	3825	NA	NA	NA	NA	734	NA	NA	NA	NA	NA	131	NA	NA	NA	NA	NA	NA	NA	NA	NA	NA
QC_exp3-liver_6d	NA	8247	NA	565644	21001	NA	11188	1884	179492	765366	87957	18736329	NA	NA	121551	124563577	NA	1980	25387	38824	1222140	35337	1954645	5656	2599658	2680065	397085	NA	NA	303808	293907	1200888	NA	532173	12974	282103	64130	6633	NA	825978	62878	1360	723132	3623318	153764	242876	10450769	354808	15091022
QC_exp3-liver_5h	27	NA	NA	NA	NA	NA	NA	NA	NA	NA	NA	NA	7	NA	NA	NA	475	NA	NA	NA	NA	NA	NA	NA	NA	NA	NA	1688	NA	NA	NA	NA	768	NA	NA	NA	NA	NA	139	NA	NA	NA	NA	NA	NA	NA	NA	NA	NA
QC-exp3-liver_5a	NA	NA	8461	NA	NA	6466	NA	NA	NA	NA	NA	NA	NA	1434	NA	NA	NA	NA	NA	NA	NA	NA	NA	NA	NA	NA	NA	NA	593	NA	NA	NA	NA	NA	NA	NA	NA	NA	NA	NA	NA	NA	NA	NA	NA	NA	NA	NA	NA
QC_exp123-liver_6bb	35	NA	NA	NA	NA	NA	NA	NA	NA	NA	NA	NA	85	NA	NA	NA	744	NA	NA	NA	NA	NA	NA	NA	NA	NA	NA	3987	NA	NA	NA	NA	674	NA	NA	NA	NA	NA	115	NA	NA	NA	NA	NA	NA	NA	NA	NA	NA
QC_exp123-liver_pre.baliver2	24	NA	NA	NA	NA	NA	NA	NA	NA	NA	NA	NA	12	NA	NA	NA	685	NA	NA	NA	NA	NA	NA	NA	NA	NA	NA	3786	NA	NA	NA	NA	636	NA	NA	NA	NA	NA	87	NA	NA	NA	NA	NA	NA	NA	NA	NA	NA
QC-exp3-liver_5b	NA	NA	8119	NA	NA	6668	NA	NA	NA	NA	NA	NA	NA	1414	NA	NA	NA	NA	NA	NA	NA	NA	NA	NA	NA	NA	NA	NA	579	NA	NA	NA	NA	NA	NA	NA	NA	NA	NA	NA	NA	NA	NA	NA	NA	NA	NA	NA	NA
QC-exp3-liver_5c	NA	NA	7403	NA	NA	6652	NA	NA	NA	NA	NA	NA	NA	1301	NA	NA	NA	NA	NA	NA	NA	NA	NA	NA	NA	NA	NA	NA	534	NA	NA	NA	NA	NA	NA	NA	NA	NA	NA	NA	NA	NA	NA	NA	NA	NA	NA	NA	NA
QC_exp1-liver_5a	67	6333	NA	470430	13050	NA	7909	1036	156645	671389	82212	18396320	227	NA	111029	147990626	987	2099	20155	11824	1579774	32546	1988482	11307	2313341	1958331	420755	9128	NA	259544	262060	1448385	936	605842	12123	923609	22021	8680	170	791350	45021	1262	410846	2805086	155764	82598	10399835	263840	13602818
QC-exp3-liver_5d	NA	NA	7297	NA	NA	6539	NA	NA	NA	NA	NA	NA	NA	1298	NA	NA	NA	NA	NA	NA	NA	NA	NA	NA	NA	NA	NA	NA	578	NA	NA	NA	NA	NA	NA	NA	NA	NA	NA	NA	NA	NA	NA	NA	NA	NA	NA	NA	NA
QC_exp1-liver_5b	68	7920	NA	482527	13183	NA	7626	1606	154237	638961	82864	18596026	233	NA	113625	122899030	975	1711	20014	15630	853215	30361	1967259	6462	2245450	2012669	422773	9281	NA	224809	254447	1521157	883	593223	14287	844087	29400	7661	137	790513	43602	1099	404690	2853570	131397	79916	11045966	257106	12505880
QC-exp3-liver_5e	NA	NA	7077	NA	NA	6591	NA	NA	NA	NA	NA	NA	NA	1261	NA	NA	NA	NA	NA	NA	NA	NA	NA	NA	NA	NA	NA	NA	556	NA	NA	NA	NA	NA	NA	NA	NA	NA	NA	NA	NA	NA	NA	NA	NA	NA	NA	NA	NA
QC_exp1-liver_6a	NA	8208	NA	492925	12805	NA	8469	1483	161909	695088	74769	17857749	NA	NA	102404	128783166	NA	1621	21065	20497	778747	22782	2184394	5713	2228239	2252195	491761	NA	NA	238799	263146	1559904	NA	583716	14266	829722	34215	6585	NA	944187	42255	1219	405734	2838555	171179	78101	10712901	266489	13674285
QC_exp1-liver_5c	84	9366	NA	484147	13796	NA	8352	1403	158206	685137	83038	18677067	210	NA	108175	127533621	915	1847	21875	17789	787136	31940	2055338	6344	2267318	2221474	440173	9473	NA	241609	256394	1500126	822	603785	14565	791113	32118	7353	124	862114	47140	1043	421488	3017037	148038	81935	10488069	268181	13227558
QC-exp3-liver_5f	NA	NA	7062	NA	NA	6527	NA	NA	NA	NA	NA	NA	NA	1247	NA	NA	NA	NA	NA	NA	NA	NA	NA	NA	NA	NA	NA	NA	573	NA	NA	NA	NA	NA	NA	NA	NA	NA	NA	NA	NA	NA	NA	NA	NA	NA	NA	NA	NA
QC_exp1-liver_6b	NA	9903	NA	438950	12042	NA	7549	1431	155850	614678	72421	16353875	NA	NA	88073	122485214	NA	2045	17748	19049	752607	24961	1947787	4054	2068281	2040046	417186	NA	NA	230896	235390	1501170	NA	523729	13026	703905	39602	6193	NA	839852	39949	1144	355711	2475029	147779	61785	10545669	223365	11974833
QC_exp2-liver_5a	51	3741	NA	498215	14114	NA	6202	1612	150681	736987	81133	23732572	5	NA	94517	150386066	777	2231	23046	17112	1367908	26974	1979074	8705	2556620	1543606	414548	1923	NA	232578	244404	1916384	1023	658526	10999	959768	12851	6000	129	774443	46358	1308	497760	2824439	134987	111081	13691198	300135	15300186
QC_exp1-liver_5d	72	7689	NA	510748	13434	NA	8609	1457	166468	731844	85697	19655806	231	NA	116619	126025739	953	1718	22191	20777	864242	28238	2266664	6820	2320767	2297170	498138	9469	NA	240631	261739	1517208	809	629356	14975	760406	35382	7597	140	966658	48794	1248	438606	3177530	160000	84925	10678911	274148	14252100
QC-exp3-liver_5g	NA	NA	6917	NA	NA	6487	NA	NA	NA	NA	NA	NA	NA	1210	NA	NA	NA	NA	NA	NA	NA	NA	NA	NA	NA	NA	NA	NA	555	NA	NA	NA	NA	NA	NA	NA	NA	NA	NA	NA	NA	NA	NA	NA	NA	NA	NA	NA	NA
QC_exp1-liver_6c	NA	7783	NA	442667	11967	NA	8363	1139	163504	592107	70794	16813875	NA	NA	87298	116112614	NA	2208	16988	21163	730865	22679	1871809	4472	2028556	1948571	388017	NA	NA	220491	240465	1603627	NA	540494	11871	640956	36247	4463	NA	864415	42665	989	327097	2544486	135315	70288	10572892	228469	11821212
QC-exp1-liver_5a	NA	NA	6932	NA	NA	5421	NA	NA	NA	NA	NA	NA	NA	1438	NA	NA	NA	NA	NA	NA	NA	NA	NA	NA	NA	NA	NA	NA	392	NA	NA	NA	NA	NA	NA	NA	NA	NA	NA	NA	NA	NA	NA	NA	NA	NA	NA	NA	NA
QC_exp2-liver_5b	33	4454	NA	545315	16174	NA	5940	1756	148936	734181	83403	24181107	10	NA	101995	133503130	792	1988	24426	40268	1147945	30426	2040481	5489	2662718	1909151	457124	1831	NA	252054	258234	1883151	1082	689042	13596	960522	14807	7848	120	826669	54483	1462	499294	3094472	144439	124179	13814240	278508	15726465
QC_exp123-liver_post.baliver2	21	NA	NA	NA	NA	NA	NA	NA	NA	NA	NA	NA	9	NA	NA	NA	687	NA	NA	NA	NA	NA	NA	NA	NA	NA	NA	3731	NA	NA	NA	NA	647	NA	NA	NA	NA	NA	90	NA	NA	NA	NA	NA	NA	NA	NA	NA	NA
QC_exp1-liver_5gb	NA	NA	NA	NA	NA	NA	NA	NA	NA	NA	NA	NA	NA	NA	NA	NA	NA	NA	NA	NA	NA	NA	NA	NA	NA	NA	NA	NA	NA	NA	NA	NA	NA	NA	NA	NA	NA	NA	NA	NA	NA	NA	NA	NA	NA	NA	NA	NA	NA
QC_exp1-liver_5gc	NA	NA	NA	NA	NA	NA	NA	NA	NA	NA	NA	NA	NA	NA	NA	NA	NA	NA	NA	NA	NA	NA	NA	NA	NA	NA	NA	NA	NA	NA	NA	NA	NA	NA	NA	NA	NA	NA	NA	NA	NA	NA	NA	NA	NA	NA	NA	NA	NA
QC_exp1-liver_5gd	NA	NA	NA	NA	NA	NA	NA	NA	NA	NA	NA	NA	NA	NA	NA	NA	NA	NA	NA	NA	NA	NA	NA	NA	NA	NA	NA	NA	NA	NA	NA	NA	NA	NA	NA	NA	NA	NA	NA	NA	NA	NA	NA	NA	NA	NA	NA	NA	NA
QC_exp123-liver_pre.baliver1	40	NA	NA	NA	NA	NA	NA	NA	NA	NA	NA	NA	63	NA	NA	NA	594	NA	NA	NA	NA	NA	NA	NA	NA	NA	NA	3604	NA	NA	NA	NA	556	NA	NA	NA	NA	NA	75	NA	NA	NA	NA	NA	NA	NA	NA	NA	NA
QC_exp2-liver_5c	25	3219	NA	561332	16117	NA	7643	1912	148329	726138	84496	24462979	7	NA	102731	127157143	778	1930	22629	38116	1014419	25232	2025766	5033	2772343	1987738	440679	1810	NA	249099	259321	1825612	937	694480	13967	857527	12493	5941	122	820175	50681	1134	524153	3162595	141752	129486	13425112	278080	16117272
QC-exp1-liver_5b	NA	NA	6982	NA	NA	5654	NA	NA	NA	NA	NA	NA	NA	1407	NA	NA	NA	NA	NA	NA	NA	NA	NA	NA	NA	NA	NA	NA	426	NA	NA	NA	NA	NA	NA	NA	NA	NA	NA	NA	NA	NA	NA	NA	NA	NA	NA	NA	NA
QC_exp1-liver_6d	NA	7163	NA	440446	12502	NA	7759	1782	156187	562109	76014	17349013	NA	NA	86639	109983194	NA	2092	18004	23636	700195	22410	1879696	4378	2074711	1885407	377154	NA	NA	228757	233020	1571581	NA	502678	10063	611179	25949	5308	NA	815950	44461	1054	354979	2462335	131056	70783	10580709	227293	11913958
QC_exp1-liver_5e	49	7399	NA	458382	13333	NA	8217	1026	166221	585394	75793	19009730	202	NA	92824	108253452	1107	1734	18785	23782	814799	22769	2083038	5522	2089687	2063173	417498	9206	NA	218883	231855	1564403	773	550944	10949	514816	39234	6046	144	946328	44401	927	390253	2805493	133684	71147	10558037	229436	12215146
QC_exp2-liver_5e	30	NA	NA	NA	NA	NA	NA	NA	NA	NA	NA	NA	7	NA	NA	NA	794	NA	NA	NA	NA	NA	NA	NA	NA	NA	NA	1863	NA	NA	NA	NA	1016	NA	NA	NA	NA	NA	112	NA	NA	NA	NA	NA	NA	NA	NA	NA	NA
QC-exp1-liver_5c	NA	NA	6918	NA	NA	5745	NA	NA	NA	NA	NA	NA	NA	1409	NA	NA	NA	NA	NA	NA	NA	NA	NA	NA	NA	NA	NA	NA	426	NA	NA	NA	NA	NA	NA	NA	NA	NA	NA	NA	NA	NA	NA	NA	NA	NA	NA	NA	NA
QC_exp1-liver_5f	65	NA	NA	NA	NA	NA	NA	NA	NA	NA	NA	NA	193	NA	NA	NA	915	NA	NA	NA	NA	NA	NA	NA	NA	NA	NA	9191	NA	NA	NA	NA	888	NA	NA	NA	NA	NA	159	NA	NA	NA	NA	NA	NA	NA	NA	NA	NA
QC_exp2-liver_5f	43	NA	NA	NA	NA	NA	NA	NA	NA	NA	NA	NA	7	NA	NA	NA	814	NA	NA	NA	NA	NA	NA	NA	NA	NA	NA	1973	NA	NA	NA	NA	992	NA	NA	NA	NA	NA	109	NA	NA	NA	NA	NA	NA	NA	NA	NA	NA
QC_exp2-liver_5d	25	2707	NA	527691	14263	NA	7316	1736	149246	640978	82829	25964157	5	NA	82182	120661997	788	2226	24099	35201	870597	15191	2150878	3976	2631442	1937303	471607	1868	NA	238276	263908	1996703	1059	694945	9514	653239	5241	6945	122	864385	48834	1400	508522	3161709	133832	117927	13795863	288857	16193823
QC-exp1-liver_5d	NA	NA	6969	NA	NA	5675	NA	NA	NA	NA	NA	NA	NA	1168	NA	NA	NA	NA	NA	NA	NA	NA	NA	NA	NA	NA	NA	NA	402	NA	NA	NA	NA	NA	NA	NA	NA	NA	NA	NA	NA	NA	NA	NA	NA	NA	NA	NA	NA
QC_exp1-liver_5g	76	NA	NA	NA	NA	NA	NA	NA	NA	NA	NA	NA	228	NA	NA	NA	952	NA	NA	NA	NA	NA	NA	NA	NA	NA	NA	9033	NA	NA	NA	NA	736	NA	NA	NA	NA	NA	129	NA	NA	NA	NA	NA	NA	NA	NA	NA	NA
QC_exp2-liver_5g	24	NA	NA	NA	NA	NA	NA	NA	NA	NA	NA	NA	5	NA	NA	NA	830	NA	NA	NA	NA	NA	NA	NA	NA	NA	NA	1859	NA	NA	NA	NA	1018	NA	NA	NA	NA	NA	108	NA	NA	NA	NA	NA	NA	NA	NA	NA	NA
QC-exp1-liver_5e	NA	NA	6896	NA	NA	5512	NA	NA	NA	NA	NA	NA	NA	1134	NA	NA	NA	NA	NA	NA	NA	NA	NA	NA	NA	NA	NA	NA	388	NA	NA	NA	NA	NA	NA	NA	NA	NA	NA	NA	NA	NA	NA	NA	NA	NA	NA	NA	NA
QC_exp2-liver_6a	NA	3184	NA	598950	16432	NA	8507	1623	155387	733592	89022	24802953	NA	NA	99622	117846570	NA	1926	25279	33834	898713	22512	2164461	4769	2737031	1992960	499535	NA	NA	241470	286178	1954854	NA	647111	11667	890532	10513	7991	NA	945977	53876	975	528656	3239382	144672	130225	13815034	301137	17057144
QC_exp1-liver_5h	62	NA	NA	NA	NA	NA	NA	NA	NA	NA	NA	NA	182	NA	NA	NA	921	NA	NA	NA	NA	NA	NA	NA	NA	NA	NA	9071	NA	NA	NA	NA	929	NA	NA	NA	NA	NA	119	NA	NA	NA	NA	NA	NA	NA	NA	NA	NA
QC_exp2-liver_6b	NA	2666	NA	565282	16514	NA	9068	1153	160636	685949	86390	25427041	NA	NA	101757	128151331	NA	2058	26190	36535	928504	17883	2216868	4572	2818705	1997135	523395	NA	NA	256504	296598	1941516	NA	723055	11391	848090	7824	7534	NA	972233	52691	1354	565693	3345023	140837	120339	13449520	305099	15572298
QC-exp1-liver_5f	NA	NA	6608	NA	NA	5759	NA	NA	NA	NA	NA	NA	NA	1180	NA	NA	NA	NA	NA	NA	NA	NA	NA	NA	NA	NA	NA	NA	368	NA	NA	NA	NA	NA	NA	NA	NA	NA	NA	NA	NA	NA	NA	NA	NA	NA	NA	NA	NA
QC_exp2-liver_6c	NA	2643	NA	575530	16420	NA	9394	2190	163336	706096	87084	26413655	NA	NA	100334	118832761	NA	2382	26198	34292	906725	17641	2259155	5575	2895442	1975922	612468	NA	NA	280393	310199	1943465	NA	715608	11177	720917	6755	7091	NA	1122575	51831	1515	568102	3249290	138455	119408	13279802	309523	16565339
QC-exp1-liver_5g	NA	NA	6950	NA	NA	5824	NA	NA	NA	NA	NA	NA	NA	1218	NA	NA	NA	NA	NA	NA	NA	NA	NA	NA	NA	NA	NA	NA	420	NA	NA	NA	NA	NA	NA	NA	NA	NA	NA	NA	NA	NA	NA	NA	NA	NA	NA	NA	NA
QC-exp1-liver_5h	NA	NA	6788	NA	NA	5796	NA	NA	NA	NA	NA	NA	NA	1242	NA	NA	NA	NA	NA	NA	NA	NA	NA	NA	NA	NA	NA	NA	386	NA	NA	NA	NA	NA	NA	NA	NA	NA	NA	NA	NA	NA	NA	NA	NA	NA	NA	NA	NA
QC-exp1-liver_4f	NA	NA	6506	NA	NA	5642	NA	NA	NA	NA	NA	NA	NA	964	NA	NA	NA	NA	NA	NA	NA	NA	NA	NA	NA	NA	NA	NA	386	NA	NA	NA	NA	NA	NA	NA	NA	NA	NA	NA	NA	NA	NA	NA	NA	NA	NA	NA	NA
QC_exp2-liver_6d	NA	2571	NA	554703	15663	NA	9170	2092	163942	698159	89535	26334189	NA	NA	102944	120197974	NA	2136	26043	31736	890801	15801	2388047	4139	2914346	1942972	728150	NA	NA	272435	293532	2010190	NA	752380	8915	643366	7822	6049	NA	1302433	50363	1555	558417	3410936	137131	142498	13796437	309592	17544485
QC_exp123-liver_post.baliver1	47	NA	NA	NA	NA	NA	NA	NA	NA	NA	NA	NA	6	NA	NA	NA	569	NA	NA	NA	NA	NA	NA	NA	NA	NA	NA	3394	NA	NA	NA	NA	473	NA	NA	NA	NA	NA	84	NA	NA	NA	NA	NA	NA	NA	NA	NA	NA
Nacl-j3-exp3-liver_3	52	4428	6844	372671	15527	8885	10710	1003	110403	271722	64648	14054131	8	1064	81217	129969674	1469	1881	20694	16229	1174963	41712	954037	6162	2493374	2838799	442646	2305	729	290532	281700	1143656	2697	195090	7763	327143	28523	6100	152	855887	60930	895	1396536	3109260	115708	530459	10115745	364055	7883578
FECES-j3-exp3-liver_16	17	4147	8643	414055	12726	11784	11136	1214	187375	454610	52812	13089500	3	1144	99839	112891113	125	2013	18864	24124	1040344	31916	957712	5661	2776884	2283157	434393	1340	458	347410	270610	1159107	231	423659	6533	245492	25016	7582	50	856498	72927	1599	644970	1727878	162960	321419	10183186	266220	7996500
ATB-j7-exp3-liver_33	12	5970	8404	367648	25853	15456	9898	1125	152433	576718	88609	17171653	9	1117	116255	111675141	64	1879	18656	21824	1198379	36242	1679193	5934	2234740	1984455	448538	473	362	311469	299047	1174528	227	973810	7751	326826	50609	6855	50	886024	53089	1301	544947	3908281	115164	135341	9843792	399712	15256532
AKKERMANSIA-j14-exp3-liver_63	44	8582	8704	747179	13561	3080	11210	1221	187108	905993	73683	15463373	4	612	177153	166297123	615	2057	19775	16463	779066	27910	1624362	4970	2069867	3353138	524370	213	240	286626	309685	1155090	344	605917	11470	306828	125530	9361	84	1071394	42821	2137	296382	2250670	223652	74888	10139879	326984	12756249
Nacl-j7-exp3-liver_27	18	6331	6325	436840	11065	3770	7822	1703	165674	908845	53599	13833649	5	1117	150453	161249618	442	1827	30410	16513	901065	28693	1207262	8944	2743881	2482688	482625	338	402	248753	218078	1166535	365	441981	8633	273006	90346	6051	73	954126	56543	1010	516062	1835763	119142	153886	10136847	129237	6662473
ATB-j3-exp3-liver_9	174	4917	8512	361873	22098	4421	10588	852	141017	619148	82164	18108357	8	979	77266	110225443	288	1921	32933	23899	1020399	42154	1364358	5720	2499130	2313128	563895	2497	376	307639	284829	1157893	3157	355529	7518	395213	28172	5485	103	1070900	62329	1696	674565	2868981	130945	327501	10128859	416962	13923123
FECES-j7-exp3-liver_40	12	4592	6805	539063	19764	4162	11814	947	128252	406768	64113	13139181	6	1065	74019	114912263	148	1865	16093	15081	680204	22149	1063860	4195	1898381	1900144	655824	2161	309	246228	286315	1173650	246	243490	5763	262774	12383	4628	39	1302122	45725	1043	519153	2583079	139720	213366	9536784	276947	10336570
AKKERMANSIA-j3-exp3-liver_22	7	5145	5175	394466	15223	5500	10056	928	145821	394313	61352	15586480	4	983	93211	109851113	117	1792	18855	18318	865373	35117	1188699	5058	3155629	2042050	335294	1007	519	313965	270840	1140859	242	237947	5446	279195	20586	6030	62	673453	68096	3952	819567	2739021	112020	309935	10111116	298016	8573860
ATB-j14-exp3-liver_50	8	5697	6668	254782	12818	3020	10002	1017	127578	763971	53950	13113567	7	831	78553	109075861	63	2224	14818	16943	519777	20579	1564530	3331	2512506	1820268	453141	769	346	234660	252820	1131089	200	486219	9091	323104	17312	5186	52	885957	32914	1299	270246	2796080	115404	52669	10047159	234197	9247290
FECES-j14-exp3-liver_59	87	4002	9551	409656	19282	10403	11871	1127	143245	413708	97648	17176311	7	831	108242	98096113	1167	1451	10628	10656	681109	20661	1644596	5080	2674021	2854050	1235289	3006	295	326468	295334	1164107	2013	587376	7960	278372	46523	9145	69	2321147	45553	783	381627	2778929	118902	80194	9896488	210209	15863907
Nacl-j3-exp3-liver_5	42	8380	10057	804838	16261	5354	11073	1500	192305	1583088	96057	19120185	9	1100	170608	166237522	819	2120	40671	29130	1150923	60386	2060243	5447	2513381	3987346	373027	649	458	290560	318639	1171701	411	584941	12938	476155	137436	8991	52	754500	80878	1444	721225	4043767	182455	321556	10069240	308648	15268523
AKKERMANSIA-j7-exp3-liver_43	11	5049	4932	536973	22901	2964	12612	1610	131343	874523	62126	14703138	4	1732	119851	152402512	180	1859	20306	18266	806971	26740	1167742	5028	1828284	2248139	748144	2188	392	232263	244836	1178709	242	571931	11965	436840	36958	5314	55	1435712	50982	982	490352	2890667	118047	108712	9943422	345194	6648113
FECES-j7-exp3-liver_37	14	6698	6643	924615	14712	3040	12832	1226	141872	602054	79355	18115513	10	983	83956	139523145	461	1723	20965	20770	1039126	39729	1977871	5080	846933	3583995	491287	8489	481	240726	251440	1174648	287	176528	7494	328592	30731	6439	45	966825	75969	1430	1148991	4065941	181355	444970	10126157	396651	11728504
ATB-j3-exp3-liver_8	6	4741	7562	260231	22462	5137	12015	1291	120891	582567	73493	16117093	7	919	80123	80053149	65	1781	17129	19989	1009716	41411	1723250	4598	2030549	1758779	706785	508	504	299604	313271	1134572	181	534091	6785	216969	22063	4800	62	1383894	57685	1180	770491	3733679	93746	268826	10129485	282934	12263518
AKKERMANSIA-j14-exp3-liver_65	29	5419	7430	607414	25656	5710	12390	1102	143737	816972	89008	18977902	4	940	127984	98084396	704	1894	21470	20121	744871	35875	1609894	4753	1881387	2297572	416236	440	384	286375	275263	1170791	374	997006	11986	324499	39518	8174	54	799878	55889	1510	505032	3537561	152720	83441	9657936	309150	16066533
Nacl-j7-exp3-liver_26	54	7074	7595	752299	21822	3366	11591	1849	209642	1381925	81359	16522362	3	992	182778	165721000	418	2044	24768	23631	1089606	38454	1417982	14125	2723421	4869853	377902	242	566	349938	298330	1152100	375	608501	18072	443145	107008	6868	147	710911	76492	1011	992541	2838643	215524	293078	10231525	295445	12942996
FECES-j3-exp3-liver_14	17	6798	8288	405167	18922	7455	13562	1164	194635	643125	65944	16336284	3	877	98696	124470399	175	1852	21259	28179	1078589	33806	1392334	5849	3005888	2741067	595400	2321	458	347556	288257	1180546	199	430666	10877	269454	36229	6303	38	1120813	80854	1265	778072	2877530	182610	346879	10252533	428741	11108103
AKKERMANSIA-j3-exp3-liver_20	22	5904	5562	630673	36034	9073	11222	1628	164052	643804	99630	21308020	6	849	155732	111721941	136	2027	21148	26018	1204636	37075	1819934	4801	2434539	2222626	932148	1814	427	307954	263708	1198843	361	806260	8704	276928	69769	10745	51	1758769	75398	3199	631482	3178728	155628	212506	10232077	772044	18461336
ATB-j7-exp3-liver_32	75	7041	5935	403414	28535	3126	11557	970	163970	1080722	110518	18332487	10	827	100032	125015116	1254	1789	22468	28950	1227125	41868	2250341	6248	3709530	2235953	334863	2816	429	309065	271247	1208869	2438	579112	14491	537193	56781	6112	2909	666385	61358	2541	870002	5291602	163393	197748	10229351	321042	21438915
Nacl-j3-exp3-liver_4	67	6601	5350	360087	16901	4679	10092	974	191138	604510	66784	16944955	9	879	165295	148410555	558	1811	19931	22597	908220	31151	2266296	6794	1837414	4709723	391663	711	162	289182	266219	1228364	269	481655	8902	376270	68287	5158	81	731701	66500	607	617597	4443871	133459	255119	10354694	406878	8563133
AKKERMANSIA-j14-exp3-liver_61	24	4623	5814	640668	8167	2708	10607	1003	111181	1054318	57355	12718796	8	883	120595	134741104	427	2003	24054	18694	526194	23300	1382256	3908	2460067	2443261	765331	701	372	307195	299690	1215760	389	530663	17164	297932	37685	8355	90	1498278	42955	2206	197469	2987393	148035	29200	10270042	106594	7592713
ATB-j3-exp3-liver_11	10	5319	7378	316661	18290	9519	13346	1778	149132	575256	77548	15944063	8	878	90221	85071622	50	2053	20219	27118	1170785	40480	1356063	5601	2539075	2373263	565842	1250	456	278841	283858	1198867	172	283709	7137	267529	34936	6096	59	1085939	64177	1258	816220	2780863	132101	353274	10461435	403734	12364318
FECES-j7-exp3-liver_41	15	7643	8564	1289131	20772	13375	12964	1776	171385	532582	99837	20318241	9	1475	147117	128804253	300	2234	22869	31628	1495022	56819	1591047	6738	1966889	3644557	457026	6414	577	232218	241592	1241610	614	176406	8173	407515	61022	5943	43	906113	79065	1091	1570960	3831254	232911	758373	10460913	533740	15113519
AKKERMANSIA-j7-exp3-liver_46	9	5955	8701	661907	19316	3685	10950	1830	191835	1078652	85319	21038667	7	942	146219	155532098	191	2040	29480	35648	1298305	55230	1656234	6404	1841074	3098100	413346	1894	415	242316	221324	1260933	240	336206	15417	424427	94398	7969	53	819352	89775	2015	941501	3573983	214803	364313	10512834	373722	14011380
ATB-j14-exp3-liver_53	8	2555	7923	414733	22768	7301	10730	960	140292	853890	96884	16843845	15	801	90799	60480417	63	1790	15707	25127	744831	18517	2148521	4641	1866009	1716211	1498881	429	336	290939	251076	1240588	181	379455	5771	193479	32841	7901	55	2815691	47004	1276	365609	3095575	112884	81137	10192404	199011	16503151
Nacl-j7-exp3-liver_28	41	7196	7062	504442	22717	4204	11704	1167	198148	766201	71823	15387329	8	983	147822	129961329	346	1855	18738	21689	844108	29852	1101202	7916	2436579	3270858	337608	455	321	276067	238870	1233445	394	468903	8382	289828	50469	6172	110	616041	72572	476	779588	2207965	177475	266959	10203310	243457	10761657
FECES-j14-exp3-liver_58	52	7879	5623	673402	10271	2641	10168	2006	170368	1360367	66160	17632787	9	900	204952	166310075	1748	1940	23013	25384	1052059	31023	2372094	5192	2001407	2622769	399225	832	388	272757	226303	1246498	637	529545	22940	424379	163952	10370	119	778576	68784	1188	486148	4379433	139913	108974	10383228	270259	8070694
ATB-j7-exp3-liver_35	9	5636	6327	449027	32298	4796	11339	1591	147617	582920	84998	16693700	4	986	79279	109240800	76	2097	19427	29683	1220506	32517	1688934	4933	2047117	2549613	837064	794	534	339433	278880	1243133	242	274851	6065	368338	46475	4549	79	1559360	56553	1719	965430	4715260	127597	277162	10393930	553314	14041525
AKKERMANSIA-j3-exp3-liver_19	13	9265	5172	414110	28989	6585	11520	1649	143464	743647	121432	21563574	7	1046	100255	107400250	100	2173	23006	24492	1319630	39489	3100966	6045	2490470	2218979	629604	1229	533	289843	273956	1242614	321	333407	10390	350961	10095	10063	50	1229296	50947	1873	1161996	6192368	144322	319444	9993360	436744	21901934
FECES-j7-exp3-liver_38	13	5649	5299	793505	27905	3576	14399	1256	136576	620454	81007	18170237	8	851	120047	131911218	112	1865	22158	22142	999765	29076	2554258	5179	2104746	2176050	1155048	1224	484	263416	234958	1231102	171	394242	8365	355178	47732	6311	34	2241391	71713	1440	826537	5270654	134725	260671	10356750	813076	12558741
Nacl-j3-exp3-liver_6	36	4897	6620	593226	16588	16779	10933	1105	190109	352448	77595	15023348	6	1031	184082	87063595	714	1960	15179	18917	802453	29880	1201863	4390	2214587	2801544	656869	462	478	294934	297005	1232043	296	465770	5468	281069	62629	6599	57	1246546	53547	562	632890	1678602	123635	283761	10334345	297889	11945856
AKKERMANSIA-j14-exp3-liver_64	45	6880	4686	480792	10183	3487	10811	890	153286	405713	59982	13448608	15	718	105573	114950899	884	1798	25765	15847	513975	24256	1426854	7992	1981401	2443871	524348	1387	245	263681	270702	1224604	627	588918	11863	286351	58489	7379	118	1000151	35605	886	269936	2434900	126870	57443	9952240	328090	8767515
FECES-j3-exp3-liver_17	10	7262	6879	422695	20968	9143	11631	1466	168063	615551	67506	16229077	3	850	105431	105032709	161	1748	22122	30716	1141510	49476	1182497	5599	2296634	2698672	341581	3011	545	334179	247948	1201992	216	275751	9875	392658	52053	5852	29	656661	70250	1482	837651	2979205	177747	401243	10366467	299418	10120326
ATB-j3-exp3-liver_7	8	6026	6542	206505	23078	6997	10055	1204	95429	419418	73295	15448179	4	782	82996	105824211	50	1999	15015	20328	844632	33524	3107795	5662	2457079	1619521	575972	501	373	313522	321924	1219828	178	649434	8244	272494	24987	5351	51	1129423	37684	756	787710	6200082	68828	165298	10128109	529902	11866716
FECES-j14-exp3-liver_60	26	8705	4712	398666	20742	15953	10686	1592	163893	212890	84733	18843766	8	739	138601	93002393	1014	2239	11362	14771	553204	25660	1514473	4407	2781260	2104605	545978	560	201	313684	277532	1206536	465	846285	9742	233573	59596	6045	78	1088642	40107	375	374333	3235355	119629	64878	10277502	311834	13622051
AKKERMANSIA-j7-exp3-liver_44	10	7833	3747	622649	20765	2476	11351	1290	147719	1000461	78192	19276960	9	980	142255	106478502	151	1886	43078	21829	980922	33237	1590235	6142	2469618	2225039	547260	744	291	273044	238326	1181391	166	537374	15470	405420	74265	9109	52	1046915	44950	1962	354794	2779348	128930	67224	10217279	247260	12771318
Nacl-j3-exp3-liver_2	71	8930	8964	871663	22903	4997	12046	2134	186722	906460	103071	21098061	12	900	107837	129265915	1940	1863	46426	28923	1097182	45256	1858518	4688	2896643	4144130	412883	1174	531	307181	292920	1193566	997	723208	10540	432356	118461	7569	243	762794	73036	1325	728038	3140595	196446	285212	9578660	210141	19301841
ATB-j14-exp3-liver_52	22	4766	7869	394699	9227	2607	11053	1395	145571	1072720	58796	14750360	6	847	89757	111114523	59	1876	19995	30122	663974	24886	1443735	3209	1142639	2129656	1026417	216	355	270728	266862	1166975	162	450387	10257	255608	40542	5232	120	2002268	51357	1437	277240	2407618	138491	55429	10373232	270317	7533180
AKKERMANSIA-j3-exp3-liver_23	17	5865	9110	1229319	34234	8485	10765	1087	137257	667910	94125	18763471	5	895	95956	119557343	197	1879	22670	33586	1160821	35106	1759833	5206	3462466	3091318	646800	3849	434	307785	235636	1197846	824	227254	5189	288668	47193	10025	122	1296220	66284	3273	805007	4774388	172206	385521	10284859	403283	14547754
FECES-j7-exp3-liver_39	12	6363	8887	1004303	24208	10221	12685	1125	182896	564893	89824	18813441	15	1131	116085	100374538	183	1719	28978	30409	1141681	44665	1734786	5459	1699271	2279690	777456	2066	513	267689	245778	1189668	314	426150	8739	297000	71979	5796	77	1523820	73906	945	950444	3252027	174104	348701	10355453	252441	15866862
ATB-j7-exp3-liver_34	7	6070	6206	432608	25695	3266	11958	1439	146724	649917	84026	16640988	4	959	78332	120706703	61	1694	21420	31723	1119878	40208	1686580	6570	2480013	2370569	555864	727	619	313988	289335	1215401	258	412944	9463	351267	37728	4737	64	1030424	61731	970	987438	4887647	127428	306617	10319284	505454	13517429
AKKERMANSIA-j14-exp3-liver_62	31	5945	6307	862459	16915	3226	11336	1576	153238	1262535	59808	15059716	10	747	171098	163209113	398	1892	25612	28913	695888	32216	1589642	5196	2605353	2836004	601067	1692	385	313770	296699	1192214	458	650088	17635	283188	78068	10677	50	1128045	60436	1605	419228	3529186	199750	71040	10275869	292921	8645331
Nacl-j7-exp3-liver_25	131	6157	4954	414352	20608	2702	10786	1542	149571	851551	66365	14198984	61	1006	142100	115854886	548	1560	20431	16770	767489	28509	1356179	7290	2757590	2805872	760252	737	421	308164	268609	1207661	827	661648	9472	317427	98273	5614	112	1449923	45284	877	454558	2853090	161637	115121	10333036	96251	10259801
FECES-j3-exp3-liver_15	6	6415	8452	549656	27105	11623	10069	1275	194166	487831	59622	14139787	8	1079	105889	84818316	173	1818	22431	35517	981809	38155	990802	5307	2547544	2413052	459211	2958	533	359429	284914	1198671	160	348686	9784	232612	46637	6471	48	876302	75541	1197	750752	2905060	163947	327770	10403427	469768	8272281
AKKERMANSIA-j7-exp3-liver_45	19	9607	6341	706768	18423	3939	11263	2066	155254	710187	79279	18203622	7	972	92307	102286017	238	2188	20827	26541	991402	44154	1783449	4365	1997245	3077657	396921	1556	590	259235	237636	1171808	132	226339	11469	400621	73349	6186	29	753858	58491	1176	1073075	3585198	142617	327727	10353142	354202	12147091
AKKERMANSIA-j14-exp3-liver_66	17	8595	6625	455570	12647	3397	9591	860	149060	618461	71706	18029487	5	828	105714	107998811	604	1930	25543	24809	568310	37048	1450051	4855	2205752	1696539	371263	757	376	290492	248617	1192227	318	505841	11604	188506	35531	10712	74	720112	60811	1167	534670	2660036	138719	99728	10257374	273140	10507491
FECES-j7-exp3-liver_42	5	6308	6853	945663	21721	5771	11669	1144	158301	628412	88954	16886837	7	1001	92132	122606216	82	1691	26213	31207	1122789	48968	1562368	5567	2230396	2585238	323782	1368	556	245790	225663	1177747	132	247101	10106	335985	44506	5530	43	619679	78660	921	1136087	4380506	162645	511006	10254691	506443	13742585
ATB-j14-exp3-liver_51	4	6595	6016	347051	16156	6055	10911	1363	153462	725937	82277	18314995	2	845	88948	92475737	81	2196	20532	26437	749222	33004	1864080	4150	1964754	1539679	457743	524	329	240338	235463	1176402	66	730801	7362	213350	43909	4992	33	929198	47877	1754	394292	2652842	130603	63676	9982966	305914	15227943
Nacl-j7-exp3-liver_30	162	8264	7303	628774	26223	3897	10248	1831	135411	471626	89052	16905621	10	1039	80719	125660450	3228	2303	14554	21208	1023804	39190	2032811	4409	2293346	4817562	475838	2358	391	314965	251035	1199235	1878	444310	12516	366219	65896	6844	121	911944	58853	889	774639	4773110	149950	268811	10379848	383956	12332427
AKKERMANSIA-j3-exp3-liver_21	10	3004	8036	514981	26867	15355	11214	1917	180100	387004	58480	17242849	6	1104	105028	43592260	124	1669	24499	36648	1123843	26241	1229436	3947	2453178	1719686	1351525	1821	507	322445	238950	1160889	159	468734	5119	184368	35316	7405	51	2589540	79059	2998	626431	2476675	116818	273950	10325637	261288	7001209
ATB-j3-exp3-liver_10	4	5205	8895	373658	19404	5666	12273	1002	167266	614650	68837	15280342	9	769	101366	85359589	130	1667	19145	34598	1142766	49084	1508272	5251	2875344	2309953	826395	2290	434	307981	311100	1189317	219	341973	8055	274230	37638	4731	45	1632897	69673	1197	755889	2820728	121988	315676	10414411	303833	10015556
ATB-j7-exp3-liver_31	4	7750	6195	225329	27025	5508	10726	856	130901	481013	86193	17880398	3	1157	74682	108126379	43	2147	20945	27914	913757	30116	2190212	3983	2839050	2482592	291132	758	259	303612	247643	1179193	109	314122	8707	267110	26580	4627	49	587300	51194	1652	599613	5306446	112255	165460	9900136	433649	13221499
FECES-j14-exp3-liver_55	68	7676	5161	663636	17901	20502	11083	1677	190239	422511	88216	17222395	8	854	204087	79805897	1148	2169	13537	15504	689220	22683	1500119	5114	2326185	2509968	582459	568	280	323693	253829	1186818	571	749076	8122	309209	94662	5850	94	1161611	32194	677	385218	1995345	107865	64657	10017234	254116	15338531
Nacl-j3-exp3-liver_1	36	8135	4413	518674	27137	8331	8374	1487	145975	413379	95235	18138693	5	777	147984	106917100	1192	2451	15308	21792	944905	33754	1975452	5124	1876367	3026622	312202	632	482	284059	258747	1183136	426	772093	8455	342144	107358	7629	160	605977	43533	613	708944	3346444	143760	208642	9740072	512674	16586404
ATB-j14-exp3-liver_54	13	9751	7324	297477	19748	8020	10478	1716	187387	688115	94305	23519581	5	792	108703	126017947	69	2020	21070	36756	956518	37502	2291777	5324	2261240	2048456	580836	344	416	349261	258219	1220572	223	524427	7457	222368	63966	6338	53	1108637	60240	1052	633716	3949928	151597	123148	10419467	351318	16183310
AKKERMANSIA-j7-exp3-liver_47	10	6083	5810	656151	34156	5089	11506	1814	184896	637544	92634	22109150	3	999	139686	103400252	217	1897	26394	36786	1055395	30406	1967847	4966	1816236	2567734	868723	1694	499	245457	220899	1210574	180	530072	6124	422154	52384	8023	73	1664725	71376	1451	766171	4340494	166833	270685	10397222	367529	13367099
FECES-j3-exp3-liver_13	9	7613	7608	323790	22885	4528	11248	1114	134807	845301	97914	18328902	8	800	77921	142271048	112	1957	16546	27345	1190746	41608	3865160	4333	2620488	2426054	570462	1315	415	370952	290320	1195220	179	532705	10256	242548	27236	5321	60	1090161	54380	1639	859196	5873359	148209	268236	9808671	456838	18200327
ATB-j7-exp3-liver_36	4	6891	10560	340789	27583	6534	9472	1715	166621	629159	86678	18804914	7	1002	96659	110233797	62	1943	19277	36413	1186354	41686	2165744	4372	2511196	2741167	344143	1213	392	327602	267437	1216714	143	498930	7498	214772	49798	5642	42	706255	77356	1698	760441	4751385	146190	276448	10527057	306023	14653957
Nacl-j7-exp3-liver_29	94	9970	4584	609623	36199	5026	11731	1447	210183	672032	109299	20357677	8	1160	152828	149205609	1108	1794	20071	29845	1013425	25115	2018969	7003	2754965	3827404	418879	535	343	291152	228295	1243341	552	815612	7458	418758	87932	7002	85	792579	76090	554	775167	4408471	205817	263159	9511535	208684	17615531
FECES-j14-exp3-liver_56	13	7990	5483	614935	12834	4509	10275	1929	171847	628362	74618	18455021	8	814	121386	89537460	447	1719	15272	22721	750606	27786	1649392	4507	2092542	2165027	495675	457	242	282272	267922	1230753	348	675470	15206	212819	61024	7657	82	994627	48267	860	263082	2311218	130802	61376	9937054	470664	12451017
ATB-j3-exp3-liver_12	8	7678	6511	291140	19291	3763	10196	1924	146231	611127	67392	18500160	4	735	82998	111934480	126	1919	18775	38820	1002773	40200	1537154	5526	2987578	2293482	354082	2209	331	279412	238481	1234081	213	223173	7443	332106	24323	4546	47	697541	82095	1679	963335	3800650	138360	442242	10496369	396307	10295097
AKKERMANSIA-j3-exp3-liver_24	11	5391	5053	512007	18129	3817	12620	1679	195474	561653	78155	19667027	4	773	131178	103903596	174	1862	20471	39043	1053904	49620	1641349	4529	2383623	2572037	1024624	6564	417	375365	315819	1262147	260	408716	7361	295830	32861	7118	32	1999967	90402	2325	746933	2323893	133977	316856	10474612	308357	12905197
ATB-j14-exp3-liver_49	9	8833	7605	356845	20403	4120	9461	1252	160603	996227	81237	21986602	5	854	108723	123911078	57	2200	20985	27582	800902	29694	1970779	4188	2159403	2212270	497654	312	315	273056	257733	1223607	131	752163	19234	263852	50708	5811	40	1018731	50110	1745	282291	2813692	141075	44437	10201160	269165	13143431
FECES-j3-exp3-liver_18	9	4862	5655	348085	19547	7061	10598	1235	178084	307687	58453	16518700	13	758	91759	85174542	95	1814	17771	32343	885659	30359	1301829	3838	2137742	1872771	641002	942	398	305458	223842	1236214	164	336545	4603	184478	21145	4179	36	1288501	72953	949	675249	2301232	105876	287654	10559434	331949	8616109
AKKERMANSIA-j7-exp3-liver_48	17	8067	8082	491575	9520	5133	13059	1599	189039	782474	70125	19992866	6	921	123071	125053618	140	2017	22505	39563	938530	42933	1644255	4951	2018039	2674237	516055	1333	369	258202	239764	1226246	159	453084	10875	235566	36764	7310	60	1007802	79021	705	549987	2092286	164138	284612	10488740	631904	11505774
FECES-j14-exp3-liver_57	211	12520	4883	610586	32845	11434	9548	1784	190882	472465	130041	22478348	8	883	200575	108640799	2901	1873	13491	17484	795927	26786	2459362	6357	2110408	3652253	480403	1854	282	278703	267221	1211853	1092	1472414	10676	333125	181323	8458	138	936825	37230	795	355489	4571768	190462	56428	10180302	201158	26170227
Nacl-j3-exp2-liver_2	36	2967	7579	642648	12663	2493	7869	2014	154190	959384	65515	20708637	8	526	99739	162679808	1324	2326	16551	12432	1039073	23557	1804457	6527	3070491	1761092	701202	441	273	252432	282621	1895676	302	597969	11681	385690	13091	6311	62	1269946	51578	1155	305073	2152098	147688	51754	13950766	179917	12607628
MITSUAKI-j3-exp2-liver_22	10	4488	6417	474509	20205	12216	8026	1483	161409	515989	98828	28291677	10	1279	137150	107281700	113	2101	18849	26132	2392751	27134	1646573	22561	3339581	1500307	543612	1235	403	367042	314007	1935070	219	592607	10874	253280	9347	8290	39	1019513	65642	2073	819297	3507701	182894	233740	13592858	305183	20194875
ATB-j7-exp2-liver_34	33	4412	9000	305018	16128	12261	6105	1401	164714	645357	94568	29266717	4	457	87375	126387330	126	2211	28487	45245	1499157	37749	2091052	8274	2884645	1320775	417302	566	310	294024	290839	1910157	828	702321	9084	317701	12320	7214	58	785736	58046	1182	598332	3397426	122556	99053	13796673	378347	18983721
MITSUAKI-j7-exp2-liver_46	145	5039	7268	523340	17090	11664	9017	1645	202839	489091	92721	32203526	6	517	144954	125159535	1659	2112	13640	34070	1190145	36080	2343439	7322	2654322	1842409	531659	3115	184	236968	291991	1808717	2227	991284	10788	349490	23550	7270	90	1066701	51152	658	358318	2657654	129004	66376	13340064	462215	19811514
BURKO-j3-exp2-liver_16	6	3801	6515	533198	14023	7264	7634	1736	168962	506887	87859	25347975	5	1026	104033	108215957	84	1855	16095	47345	1404106	36004	1866291	6521	2776509	1317650	618474	1198	362	335688	325388	1856813	248	620288	9110	265319	12975	6936	52	1162302	73718	2164	620816	3195233	149428	171070	13255703	295176	17330853
ATB-j14-exp2-liver_53	8	3616	6357	268727	12128	9434	6786	1342	140080	397623	73314	22700334	5	503	75082	93326697	54	1943	18465	38982	1336543	21708	1713831	6344	2387210	1366597	547703	271	241	225532	278526	1819427	64	573297	5968	308896	10627	5410	56	1149219	45479	1355	424151	2381719	97514	75989	13790683	211231	14575470
Nacl-j7-exp2-liver_29	11	3536	6100	984796	13670	6067	6546	2907	128097	1746367	69829	19271967	4	563	123997	166283317	807	2290	17960	41716	1416410	34539	2922357	6559	3507411	2222977	1280448	362	246	281509	290362	1887796	188	784130	21758	455677	27895	9521	71	2295390	63657	1234	359080	4611635	162674	45142	13724467	204579	8661047
BURKO-j14-exp2-liver_59	60	4814	8850	613716	18839	9687	6987	1923	168666	556149	95052	26225186	17	592	98755	114882895	220	1742	14597	39210	1370857	35955	1846359	5352	2543230	2376984	369616	2151	283	258062	264186	1881258	785	1056744	11057	397184	19927	7960	52	774389	49426	1393	531290	2927368	210127	123163	13269673	218967	19840555
BURKO-j7-exp2-liver_40	6	3832	11074	771422	19088	4778	7131	1868	156123	1004651	108986	25675914	9	425	94921	140258060	257	2051	16826	38251	1340592	38428	2398367	5701	2279169	2528985	854977	839	324	290664	288607	1880516	120	689026	13082	323423	26304	8980	74	1607679	55639	1802	450666	2625810	160119	77479	13514135	271317	21885098
HIRAE-j14-exp1-liver_67	78	7751	7199	313892	14219	3615	8312	860	145023	529746	64903	14868655	570	839	97604	154845876	684	1591	19264	11884	1168182	24378	2080113	7587	2550858	2341309	859001	3424	210	277630	264662	1488519	1071	540030	10218	199391	30047	6036	150	1570760	26739	920	320216	3476418	139369	50200	10882399	201448	10947019
BURKO-j3-exp2-liver_15	9	4387	6509	566692	23719	11190	7014	1459	145041	775354	97593	27584038	5	796	120085	108182017	148	1903	15578	40985	1392793	27956	1784545	5625	3338393	1575050	436294	1737	500	330209	316399	1853987	275	754860	9479	281095	18561	8527	56	795675	67146	2742	736949	3244768	186365	246722	13349538	381063	21719095
ATB-j7-exp1-liver_39	11	6042	4280	320822	18631	6560	7843	1166	152039	575010	80245	18276958	4	749	134724	126045534	114	1480	20385	14888	1457796	36313	1691752	9320	1988240	1085321	333001	827	305	255332	252558	1480301	83	1045081	8683	380729	22675	6680	53	656950	41253	930	382641	3365085	92554	66847	10445604	270859	13682232
Nacl-j3-exp2-liver_5	105	2876	8733	897931	7099	3243	7738	1751	178367	1117464	64557	20837942	121	471	101831	160460565	1956	1779	22779	37436	994667	41378	1458511	4588	3174107	3378908	730871	2050	283	260430	319886	1859313	1691	324427	18191	312342	19034	9615	285	1336539	79322	1432	566128	1603337	168718	123875	13798305	284312	9128321
HIRAE-j14-exp1-liver_71	71	8087	10633	2075444	14724	3439	8774	1717	218096	984750	126360	23977466	523	751	114340	165440678	3413	1739	20419	20622	1363974	47663	2251168	8273	2277001	4952389	312417	19555	275	301355	288917	1447850	2152	493872	14724	553619	77136	9567	238	606298	54980	2926	546912	3026161	260470	103307	11074484	256015	24079393
ATB-j3-exp2-liver_9	42	2288	8785	826222	18303	2689	8783	2137	149316	1086001	80105	19865151	35	428	106871	165886124	1191	2276	16381	35034	928645	23549	2440085	4400	3000375	2383532	725175	622	279	360053	347549	1832781	393	718423	10317	254587	24021	8416	136	1306232	56543	1310	386167	3681295	154869	76477	13478565	687856	15962840
Nacl-j7-exp1-liver_31	464	12094	5745	388220	10763	4418	7920	1338	149600	514000	67580	16671463	63	932	97885	156070406	2500	1652	12865	8640	1098676	30829	2041276	7384	2304220	2575631	678505	5014	329	353023	313865	1522154	2666	599759	11420	329632	24612	7849	301	1287130	29324	851	309346	3497422	202023	46231	10928543	240456	11007173
MITSUAKI-j3-exp2-liver_21	23	4930	6633	674706	15169	6599	7929	1995	162196	770606	114946	29495653	5	1096	97162	138947465	478	2113	25246	46552	1255847	42007	2351866	6209	2563908	2325641	591154	8088	600	283790	285605	1833608	3742	587012	11513	404453	15258	7212	49	1069822	73557	1157	1044008	5072703	281571	386307	13906739	89388	22835099
FRAGILIS-j7-exp1-liver_53	6	8888	6927	308939	12368	7562	7695	847	171423	281622	87837	20861561	4	757	89776	141697057	730	1623	18162	11940	979048	37292	1878682	6589	2278687	2119031	409586	673	368	241760	238914	1508099	368	510735	9540	191874	17163	7378	178	736043	48239	2079	442840	2812319	104671	97228	11074050	216673	13960864
BURKO-j7-exp2-liver_39	54	2272	8970	526419	14056	3652	6867	1509	135661	677582	62527	16710403	8	470	79042	133688850	597	1942	24908	33049	758518	38363	1337472	4662	2977526	1973070	558686	1319	452	270198	281947	1880252	1283	343901	9278	267743	6952	6346	67	1041696	52253	1705	456793	2040776	122875	89451	13649051	132335	9523303
BARNECIELA-j14-exp1-liver_84	14	6433	8489	560874	18979	5060	7570	1294	144907	873193	151434	16558389	17	690	84040	124811612	293	1518	10854	9366	846217	25983	2794971	5379	2412363	2727046	409714	629	240	207999	257454	1482184	519	671952	12985	443660	30691	7870	116	751277	36115	970	332659	3737861	149597	62534	10957556	220604	32142083
ATB-j7-exp2-liver_33	12	4159	5400	336386	16798	4670	9858	1288	171403	543325	81348	28247602	3	404	108938	139577163	86	2024	38908	44312	1027624	30919	2065462	4382	3022069	1757534	764024	399	201	293033	276994	1831491	1119	800741	13688	228321	26524	4778	53	1377384	59049	1709	422399	3113221	134480	75873	13465166	402972	17537549
ATB-j14-exp1-liver_64	5	7724	7498	217616	16452	10139	7562	1000	109187	421871	95256	16476148	2	756	70301	102530080	45	1665	15253	11945	873340	26274	2449100	4903	2439798	1455018	458953	215	251	227500	266678	1504726	78	760579	8854	235024	26184	5502	31	865378	35790	755	375540	3513552	98600	59232	10979380	201028	19137632
MITSUAKI-j14-exp2-liver_64	42	4025	240	530771	16138	3717	7341	1606	178915	337806	97467	26606954	273	120	100466	120317197	1240	1929	17924	36468	910055	32428	1878958	4800	2239131	2516940	395654	2679	50	299833	274971	1887761	1488	780392	8017	367633	24913	6121	469	841724	51327	701	574429	2270637	126113	152714	13655856	270880	19914239
FRAGILIS-j7-exp1-liver_49	114	10386	6250	426069	12921	9016	7599	1426	183709	349095	69290	16206152	7	857	111102	147817626	1803	1774	32163	13784	955657	34770	1614714	5209	2199081	2053727	301498	5613	371	231274	257222	1501783	2054	795250	12747	352721	37689	7036	293	568297	39104	562	446565	2681965	132015	100641	11039519	280360	10602044
ATB-j3-exp2-liver_10	4	3331	6184	386475	20600	2344	7453	1252	117042	733581	56879	19203907	8	522	69305	146777816	95	1930	14825	16406	1159935	25513	1546791	6214	2311890	1473198	948978	757	253	358043	326186	1890378	94	343288	6911	378556	7055	3928	31	1757488	45473	1400	533610	2937192	117429	112395	13942190	326174	8868173
BURKO-j14-exp2-liver_58	20	3487	6229	478543	18869	6660	6569	1539	117465	379707	85472	21502896	5	493	70834	97612449	44	1855	17380	27564	687528	22390	1738619	5147	2314581	1382978	464927	391	280	255149	266398	1862664	293	993925	10101	322728	7913	5607	39	912433	43939	886	358642	3521615	113881	59805	13734111	249732	15499815
BARNECIELA-j14-exp1-liver_79	23	10907	6008	434781	15357	3110	7895	1270	132441	1157637	91494	16746280	12	762	94670	166307554	932	1530	32106	12413	924499	33137	3414065	5791	2799297	2437053	409274	1297	229	221840	272892	1470089	335	774292	16601	270278	56047	7526	48	778616	34152	1281	319573	4973021	172711	35583	10998015	145454	16404994
ATB-j14-exp2-liver_52	5	4275	5665	374241	14198	6899	8500	1902	138987	577554	107912	27241421	7	640	73866	128992721	44	1989	24050	31294	904876	21370	2616698	5996	1815664	1733385	566292	312	379	220413	259685	1827494	62	698267	8560	465934	14435	4470	63	1174199	53454	1610	614558	3883302	113446	99942	13675129	274551	21616621
ATB-j3-exp1-liver_7	11	8583	7655	269311	10316	8614	8806	1340	169610	570291	93197	21081060	7	1569	90426	116900083	82	1999	21987	16636	1415157	36779	1941930	6465	1997144	1663088	551321	596	299	246264	266621	1450671	52	448064	9890	361695	31839	8069	24	1100985	47039	1233	482397	3194303	124717	97512	10932520	197873	17441157
Nacl-j7-exp2-liver_27	60	4007	8163	643309	18508	3145	7554	2647	130300	743532	97614	27350491	51	512	90951	157066674	2197	2406	12688	25916	973396	38121	2792021	5867	2793815	2891637	643226	1229	323	304661	295210	1893054	790	757660	11517	357148	19555	9416	91	1160363	53566	1342	495749	3370637	148505	73774	13832270	241196	18618677
ATB-j3-exp1-liver_11	3	8054	6646	257188	11166	7666	7679	1635	133549	555262	82719	16185615	5	701	86500	95061105	57	1974	18259	13620	1080591	38419	1810728	6113	2396627	2190665	390084	465	225	288063	327125	1489887	67	476473	9632	261436	17657	5343	32	716085	37379	963	433959	2043277	105218	108397	10859122	237774	15376307
ATB-j7-exp1-liver_41	2	7930	5399	271592	15463	5219	8598	1040	157807	520489	84141	20402341	1	825	117566	126498088	86	2078	18676	17098	1097939	29430	2356230	5799	2270018	1771382	512460	260	298	262107	280987	1497900	82	792765	11106	443790	23433	6675	24	986026	43653	2225	282357	3176327	111028	60418	10883405	103856	16059414
ATB-j3-exp2-liver_8	7	4236	7182	304842	18455	9174	7930	1662	174866	520417	84509	26829373	4	481	86567	140490750	133	2212	53111	46877	1158405	37377	2189057	5420	2754809	1968458	644296	826	323	332996	344503	1885844	216	644602	8667	336936	12774	5628	54	1149091	58105	1187	702336	2884915	108516	187360	13415953	345918	17541008
BURKO-j14-exp2-liver_57	20	4951	5510	940720	16302	16828	7831	6546	213073	495303	87771	28991242	5	588	135507	124695968	154	1894	16867	40631	1090608	29472	1653287	5605	2522896	2258629	336473	1800	309	252029	270651	1859241	788	615054	8613	463318	24970	6796	46	657440	72660	784	603438	2503411	173628	210031	13871133	286033	16345992
BARNECIELA-j3-exp1-liver_25	15	7606	5508	423446	8266	2572	9146	906	135858	924776	45639	14076772	8	761	90040	106275477	40	1530	17323	14801	716029	35464	1172418	4650	2492233	1485209	469267	678	404	328273	326162	1491742	95	308583	13227	322134	19159	5766	23	906315	44177	1599	346624	1562914	118540	66767	6969161	146229	6583469
MITSUAKI-j14-exp2-liver_65	19	1040	8761	143652	2592	8030	79	10626	49665	31853	10814	14531939	6	468	20830	19982396	1423	2319	2609	28550	895353	2919	344419	4432	354238	533970	472730	2170	208	44108	52890	1977719	534	178586	537	9933	8181	1875	85	237956	25092	659	1103296	413277	22709	51441	13674243	593242	499028
Nacl-j3-exp2-liver_3	25	2290	5311	700201	11492	2027	6393	1923	93023	636995	55718	15513747	15	410	74563	112716671	717	2081	15689	19531	480760	19304	1305264	3692	2382975	3045383	811237	606	219	248889	279195	1658967	227	499164	9890	247883	5879	6184	48	1433539	32982	847	188079	1633225	134923	21381	13437059	96345	8012572
HIRAE-j3-exp1-liver_17	8	6281	7363	216944	10538	6409	7892	1095	151948	549038	54303	16106719	6	1127	73321	97756389	47	1820	17791	14782	769185	36581	1772020	3965	2451354	1485965	414632	475	315	377946	354943	1470868	74	385435	7556	157536	9953	4771	46	812815	56088	1299	477911	2361727	111751	125692	11081647	264594	9922894
MITSUAKI-j3-exp2-liver_24	NA	3401	4753	597861	13206	8372	6688	2284	152972	580403	85179	27305602	3	824	97779	106394363	153	2549	21048	28550	946866	28409	2689181	6303	3043134	1318239	618624	1310	269	269627	267982	1909334	359	724238	14490	235651	15102	7114	13	1090491	49073	626	501410	3259099	143677	149288	13741384	311947	18558954
ATB-j14-exp1-liver_62	10	5531	8856	274238	21300	7189	8615	1111	135751	580979	91767	16946032	13	844	86430	96676240	74	1632	20316	13385	774487	27391	1923810	5518	2066310	1802799	865376	169	308	244715	268984	1464573	89	943743	11945	233573	22989	5179	26	1572112	36188	984	338820	3350769	100650	49082	10891736	354525	16934512
ATB-j3-exp2-liver_12	14	4021	5549	365930	20164	7966	8724	2838	184371	564489	92263	29002950	4	483	100907	126652543	122	1892	23187	40376	1112435	39053	2338997	4649	2682037	1924340	447941	442	326	331733	308618	1877768	386	587170	8327	356222	15319	5889	53	834630	70851	1046	684726	3681740	138978	196033	13851046	210632	18237066
BARNECIELA-j7-exp1-liver_57	13	9266	7998	710486	5414	2771	9704	2093	187847	708497	65147	20533070	11	724	102488	153038606	919	1970	31221	18303	905740	33558	2536020	4431	2088995	2714080	555641	418	274	273446	307253	1460644	236	319860	14972	503036	28470	8163	36	992285	60614	1792	347878	1915349	148238	71020	10474332	228857	9435450
BURKO-j3-exp2-liver_18	21	4434	4921	634538	16722	5222	7595	1599	167500	755357	148583	34098729	9	1033	100969	144363892	312	2026	17383	34189	1092655	24943	2634866	6363	3637366	2406762	497636	3083	447	365259	311654	1884503	584	513471	11936	459513	13691	6584	91	913950	88224	3127	669557	3446014	197928	223125	13386419	210550	30465960
HIRAE-j7-exp1-liver_45	49	5322	5240	439063	11833	5606	8569	1588	140956	460444	58072	15427749	12	872	85213	91339393	566	1809	15941	11395	663312	22307	1469508	3835	2383032	1500865	857431	1878	295	245785	291300	1461762	559	761507	8686	249128	23969	5416	66	1666897	38580	705	304887	2577657	119345	61210	10458177	158151	9384264
MITSUAKI-j7-exp2-liver_45	146	3754	5568	598940	15910	8630	8837	1957	161690	450449	73955	26758415	149	536	114411	104396279	4596	1941	17779	34247	740223	26679	1801952	4820	2500336	2140384	455875	7693	309	244139	281255	1903789	3150	964347	9913	314640	13855	6495	408	956069	57254	1160	443698	2643145	139096	91979	13836825	228526	13582311
FRAGILIS-j14-exp1-liver_75	32	10119	4880	543238	19196	6615	9258	1258	138289	432839	110872	22203020	5	938	121137	104054781	2834	1744	17726	13406	877339	34223	2268599	6599	2923352	1756750	456620	2184	360	312319	306532	1476933	395	952766	11127	270699	53008	8187	294	878211	43257	1025	475743	3501411	154793	83149	11031926	240504	21443887
Nacl-j7-exp2-liver_28	149	3772	6969	627003	19533	5580	6461	2463	158270	586643	87217	25129160	172	517	100245	104901340	2835	2152	14457	26939	831245	24929	2563093	4975	3009145	2720280	525378	3428	329	279924	299066	1941293	1664	775764	12499	269462	13940	9436	192	912081	48805	1203	426556	3896956	149032	75823	13743063	218911	17914432
Nacl-j7-exp1-liver_35	42	11127	6795	455958	7367	3402	8315	1695	186712	898298	82159	25597847	7	807	121797	165678943	1192	2021	21214	14386	902253	40147	2240521	6667	1783243	2440804	320777	698	359	284986	264558	1467128	356	433145	15732	400792	60268	7414	84	617557	55662	1717	418228	2672024	186843	69781	10549458	181850	15252655
MITSUAKI-j7-exp2-liver_47	92	3970	5057	359521	13203	10269	6672	1115	155274	304583	74184	23793954	9	409	76174	87930017	977	1859	13000	24430	569560	18562	1521285	3428	2151133	1312060	1072492	4215	250	211623	273541	1919569	2622	668740	7124	263017	5533	4990	212	2112320	45673	449	387830	2403997	104554	87818	13665967	333381	13374026
HIRAE-j7-exp1-liver_47	202	6905	5210	432148	18413	3628	8636	1479	150974	457597	93359	14860063	12	706	80227	108208525	1309	1615	13054	10473	644716	20665	2077663	4041	2539561	2012590	546558	4510	245	236109	278951	1470273	3224	655037	8097	413170	23949	6117	211	1055862	37094	1146	339839	3056066	131139	71043	10893727	151687	16257982
FRAGILIS-j3-exp1-liver_21	10	5173	6239	579699	15945	3543	7449	1278	146029	821362	58636	15101911	11	746	95751	93089349	141	2042	17970	17755	804025	30991	1745443	4966	2566351	1313227	661577	804	273	278643	270502	1462562	101	647845	8419	225460	24182	10945	30	1235940	44602	1057	404847	1941054	146006	94739	10526540	438213	10397802
MITSUAKI-j14-exp2-liver_63	15	2126	6695	641962	10266	5239	6407	1719	172076	330410	53148	18255065	13	464	91754	96056506	1446	1913	20301	34115	709565	16685	1217366	3799	2722999	1701362	380503	1219	477	253983	272474	1960053	951	436301	7286	365833	8475	5312	201	788104	60273	772	497669	2064858	87128	137142	13856205	346839	6591739
Nacl-j3-exp1-liver_1	335	13549	8232	818278	25130	5321	9004	2474	189637	627270	123433	23134345	372	694	168572	166047935	5813	2118	17414	15708	945800	32859	3039046	5641	2204332	5166986	513528	6363	462	251098	285536	1428655	2040	869930	13068	446232	122570	14247	232	1004438	46419	1044	469966	4853265	229921	78419	10972073	256173	23392684
ATB-j7-exp2-liver_32	15	3050	5029	293357	17606	6958	7738	2378	143186	480509	78898	23022545	5	397	76341	94323361	93	2101	36912	28097	798887	19980	1796905	4324	3097705	1173498	720283	207	250	305527	300428	1940032	105	774088	7787	220757	8612	3811	49	1276703	44459	1294	449787	2858003	97687	53540	13996851	162526	15994111
HIRAE-j3-exp1-liver_15	7	9503	6915	271195	7717	3310	7482	1218	180381	629510	51248	21876648	5	629	106127	165945617	52	1786	22525	21030	988210	45665	2744648	4294	2231692	1713664	308497	607	259	234122	240185	1480438	103	326243	12166	293433	34970	7233	22	580048	72748	985	519855	2812442	80917	124945	11000622	217355	7478163
BURKO-j7-exp2-liver_38	15	2677	7118	666702	17060	3584	7950	3246	132561	963987	77442	21598942	13	448	109481	148608261	549	1925	54393	32421	953489	16395	1840275	3920	2491051	2029145	724595	430	372	284970	302150	1926615	219	606434	16022	248276	12799	6941	52	1303488	61998	1350	441415	3292929	137327	78567	13615966	150191	13037135
Nacl-j7-exp2-liver_26	18	1051	3879	870042	9058	1790	7022	1783	80515	1024708	40133	11487645	5	411	86045	156710091	447	2266	12614	15670	472135	11656	1736173	3675	2590394	1951930	818735	285	258	262682	291115	1834744	143	716160	11424	336725	2188	6160	57	1467182	30186	995	172134	2032819	126536	18821	12959057	148470	5689012
FRAGILIS-j14-exp1-liver_76	80	11049	6618	622560	13957	4711	10812	1980	116139	480899	80683	21001807	3	898	129455	162078583	1874	1807	16996	17450	803788	34338	2498368	4893	2182519	2651133	527589	2283	573	296030	294768	1521514	727	800690	12651	369406	49567	10390	762	1002111	55205	755	544001	4132567	141608	91314	10543133	217382	11993688
ATB-j7-exp2-liver_35	22	3038	4638	291261	18252	3574	6490	1354	140104	544562	89223	24799785	5	473	70293	154398455	110	2011	120445	49999	692810	18624	2376464	3924	2565632	1948899	552381	783	292	289777	292500	2022149	784	726766	10391	265789	8954	5537	49	996247	53699	2376	370853	3227825	122762	61273	13889649	187988	16245963
FRAGILIS-j7-exp1-liver_54	10	9369	6846	327773	9783	6355	7174	1971	185112	327985	69479	18696445	7	738	100003	121073825	521	1593	25746	16797	696971	32943	1952108	4834	2209466	2366327	480889	974	281	232283	243982	1512385	526	498662	10641	234136	24219	6196	146	900034	50679	724	435582	2890132	118944	104274	10566265	387954	11841912
BURKO-j3-exp2-liver_14	89	3147	5001	724917	30206	4428	8331	1890	110716	882000	121579	27880902	5	906	61090	120549072	188	2085	18635	27208	1059909	22422	2539611	4394	2504322	1633097	625458	2383	486	328689	315783	1968307	3770	734988	7227	272649	9097	8677	117	1143522	61797	1364	646906	5194925	158235	200442	13726642	268041	26290997
FRAGILIS-j3-exp1-liver_22	7	5157	4129	507492	14880	3470	7393	1192	111789	560373	58477	13302848	9	646	103515	88518622	322	1658	13785	9884	653915	19028	1539915	5251	2508807	1328650	686542	591	291	398939	390959	1476027	86	597227	7805	155230	20867	6222	49	1282784	37194	1264	180264	2201089	124456	40431	11201368	87109	9970059
BARNECIELA-j7-exp1-liver_58	9	8387	5475	484981	9605	3488	7365	1357	166049	517854	86996	21489829	6	740	96644	134841892	100	1909	19976	13856	734298	26825	3342801	4167	2322421	2257928	543295	93	294	230976	257126	1462565	39	528881	10423	328818	18900	7424	51	996376	45595	1010	325940	3424965	124827	55583	10492847	212601	14344742
MITSUAKI-j3-exp2-liver_20	11	3892	4535	717218	20242	10270	7069	2178	175471	664280	103396	27986574	5	1293	146473	111279579	69	2039	23715	42343	1195687	30238	2109398	5623	2707867	1999977	743292	3451	472	301326	284974	1969569	272	502551	7395	420772	13935	7803	26	1343678	63669	1745	828874	3131821	266645	252562	14012797	246460	20321662
Nacl-j3-exp1-liver_3	10	5600	8541	620940	10249	2981	9402	1141	141327	1013535	57188	15021407	4	520	117286	141168823	473	1780	21910	17429	693946	27015	1476150	4552	2909374	2570360	1052430	454	367	254418	296435	1439163	205	339422	12991	248406	35567	7180	64	2038563	51498	1191	368508	2290855	145090	58488	10469309	226177	7372451
BURKO-j7-exp2-liver_42	12	2965	5447	681469	16966	4135	8071	1758	171517	821033	121337	32757676	7	406	84652	165446137	282	2236	17915	25299	939237	16893	2544587	5312	3247232	2697893	612879	376	253	250914	280191	1974826	155	787258	16757	447308	13366	10034	50	1146224	62210	2265	449899	2890517	157796	77416	13982622	200501	23734898
ATB-j14-exp1-liver_65	8	6942	6489	312462	13410	3838	6677	1586	137212	586901	95751	18555590	5	727	80856	104552768	78	2096	17393	16827	764103	23090	2016438	4631	2226527	1790075	382498	758	324	275605	247941	1500530	66	489625	8317	274101	33903	6095	34	752674	37613	1822	383263	2472809	127940	70736	10869993	191418	19261686
ATB-j14-exp2-liver_50	11	2502	7653	200059	13954	10879	6038	1298	135801	374757	64596	20462350	9	380	67992	112750845	105	1698	16544	23927	779551	15646	2080131	4156	2454506	1295670	481681	323	259	219523	266190	1999894	98	975939	10444	230880	4594	6646	58	1014290	33813	990	342120	2994812	79045	54159	14085723	328178	12772843
Nacl-j7-exp1-liver_33	169	8379	3593	466811	13808	2475	8381	1029	144213	601785	62806	14959357	29	547	124147	116811171	793	1771	13143	10854	582446	19870	2123235	5553	2522604	1901453	541010	1578	248	348883	307983	1496621	1346	606023	13628	262023	32028	7632	103	1069730	32321	1014	188243	2634867	131833	27632	11174476	127140	9896243
ATB-j3-exp1-liver_9	10	6977	4280	206013	9234	8349	8324	1463	138114	263660	54086	12231147	11	833	80946	60991781	63	1728	19860	15068	535104	19420	922080	5231	2206426	1138559	380156	178	216	209950	219047	1512574	74	315842	5719	285917	4533	4830	37	780442	27451	719	473438	1606018	73949	123153	10899766	306427	9411890
MITSUAKI-j7-exp2-liver_44	115	3404	7211	515529	11329	6501	7912	1454	156038	441791	61656	19893728	117	523	88123	91333630	1801	1930	13812	31216	668639	18697	1557755	4895	2211379	1835382	550287	6331	355	217778	273812	1965789	3554	575244	7518	289441	7822	5294	231	1173872	49032	1035	571992	2431677	120914	90614	13616685	254776	9811928
HIRAE-j7-exp1-liver_43	261	13908	6598	415302	20936	15453	6839	1739	191439	495065	110383	20251113	5	1018	124119	161515309	472	1929	18989	15862	817511	30382	3320044	4473	1943934	2439754	360696	5236	292	289092	288140	1497160	2190	1021136	14025	438221	48670	6711	26	704923	40421	561	505247	5607612	154056	77176	10563632	342823	21047305
ATB-j14-exp2-liver_51	10	2202	3254	308529	24438	7178	6775	1023	104427	499823	74444	20300717	3	442	62258	88817919	55	1668	23088	26357	686463	9263	1611556	4209	2644376	1311189	553665	152	237	230551	247135	1914111	33	1175157	6856	334110	7637	3121	46	1168895	33290	1099	255201	2310557	75709	35597	13891572	147653	13757084
Nacl-j3-exp1-liver_5	107	7062	6469	619123	12836	3940	8388	1761	149350	569577	59313	16437846	115	605	134911	108303342	1305	1645	16613	13054	865340	27635	1932804	4564	2150568	3212119	1089971	2250	274	288365	294028	1527304	1388	520303	16122	327389	59926	7590	77	2042153	38102	1081	304242	2495807	161939	52339	11186862	237356	8459442
BURKO-j14-exp2-liver_56	12	2494	5425	781292	19899	2366	5897	1351	106367	843701	69654	18901516	8	404	78933	146383976	50	2070	34723	24914	597623	13222	1759507	3986	2748174	1191163	669618	284	299	238790	262297	1954908	225	719172	13714	308007	7147	5454	48	1400834	49242	1243	384961	2911221	109626	51704	13967777	272545	13194708
FRAGILIS-j14-exp1-liver_73	27	6818	4242	543040	9567	3972	7510	1238	122486	418516	53035	14002057	7	536	114244	127643160	834	1675	13096	12771	557864	19208	1358014	5050	2531304	1986921	501601	501	205	320849	316499	1560390	268	665514	10362	199285	32394	5732	137	923705	34322	807	201780	1705035	108013	35392	10995355	496802	8912631
Nacl-j3-exp2-liver_4	62	2416	6472	631058	10709	3503	8747	2121	159808	757672	59486	21720977	253	418	91170	129243910	2027	1891	24255	25928	768178	20795	2421130	4946	2483238	2827806	662714	4861	237	243422	289802	1955613	2060	591787	12108	259222	9877	7908	185	1182704	54154	2032	358929	2353248	171438	56507	13945888	307376	10380114
MITSUAKI-j14-exp2-liver_62	5	2907	5276	635257	25634	8518	8840	1097	144785	444626	87916	24736210	14	423	100475	106161762	633	2240	57635	34699	755245	13055	2078931	4477	2718665	1681330	615128	319	257	237202	271445	1953220	276	1237273	8637	339651	15202	6268	54	1247014	42532	987	507576	3166105	87618	62332	13928301	270468	16157499
FRAGILIS-j14-exp1-liver_78	29	12227	6136	524624	15236	7553	10335	986	156836	380168	96964	23744779	3	784	111108	121923095	1624	2148	16933	17443	597107	31989	2042700	4463	1935369	1701786	405976	1387	331	226090	277975	1537089	604	801269	11280	246387	34257	6657	266	748966	42042	716	327090	3114017	112807	53882	10662476	405419	16991428
ATB-j3-exp2-liver_11	8	2407	6607	391963	16826	6650	8375	1333	183348	643969	70840	25385599	7	410	82255	132488474	126	2531	27580	41999	1083084	22043	1963183	5102	2594996	1836244	516772	1610	323	313472	293407	1902082	126	512609	6965	289375	7214	4873	43	954294	74534	1194	757701	2774615	133053	234668	13826220	268276	13835748
BURKO-j7-exp2-liver_37	10	1843	8797	478320	10548	4404	7727	2087	145055	843832	75302	20990591	5	363	86799	135756403	764	1900	30083	31166	655097	13067	1794045	3948	2310280	2251044	572216	242	278	247285	263108	1975707	80	489127	13888	212821	5136	7696	89	1052372	51409	1759	409018	3053567	120958	63487	13850676	195620	12483482
FRAGILIS-j7-exp1-liver_51	53	13364	4966	616358	9496	13829	7771	1305	207261	362374	99273	19460290	5	651	163639	120246822	3748	2137	16358	19221	1049494	28802	2117557	5237	1914480	3592767	467748	2681	280	230413	268413	1502176	954	765084	11272	291922	122904	6024	162	885985	33335	1399	416945	1616095	225922	100501	11187981	504305	20037780
ATB-j7-exp2-liver_36	12	3020	4735	306746	19291	10240	6624	2277	134131	469390	78875	25154482	5	457	75074	106898221	445	2123	15756	30889	755440	17519	1829426	4093	2711089	1418611	596355	810	251	255422	267847	1945251	278	665230	7655	217977	5409	4531	66	1114857	37803	1003	589267	2827470	98182	115550	13476055	419789	14922922
Nacl-j3-exp1-liver_2	33	10950	4635	596470	21753	3722	9364	1687	131947	568986	92179	20189908	7	444	144442	156538684	1066	2037	21300	16710	909198	25814	4523678	6069	6285394	3053293	510672	372	251	263998	291453	1533093	286	910503	16179	425155	67643	10382	62	969382	44276	1103	295111	5828596	151138	34385	11082677	326022	15575177
Nacl-j7-exp2-liver_25	20	2262	7413	930492	8786	2118	6791	2066	139150	853892	41959	16224633	9	353	79698	134913721	975	2036	29572	24508	603711	12670	1222509	3715	2524821	2435421	698731	547	383	247707	281064	1930959	152	333863	11130	184349	5731	5837	67	1275628	46140	1525	332262	1757416	177813	74879	13701818	137944	5444085
FRAGILIS-j3-exp1-liver_23	4	8120	4263	466314	10546	2894	8580	1461	136950	930578	74052	18024727	10	1152	90660	119502346	222	1748	18279	18424	678673	25558	1810052	5011	2238481	1356569	469493	685	327	284902	296465	1569423	52	321568	12768	234604	24078	8407	21	904938	42432	1137	385881	2148288	199308	79553	11084661	362575	13235425
BURKO-j3-exp2-liver_13	79	2975	5961	715309	17142	3828	7351	1970	156380	1015111	72199	25337212	6	1118	101469	139693171	245	2604	15250	29133	1132041	27801	2208993	5845	2860416	1108908	702849	2667	460	320296	310150	1911020	2467	429337	9451	337819	9707	7150	114	1246580	63311	1645	742903	4256554	153722	187800	13880919	440105	13071402
HIRAE-j14-exp1-liver_72	74	7731	4315	500150	8686	2994	7934	1265	161880	445247	61732	17381231	10	706	136797	126934057	4699	1525	13686	15931	585675	24080	1841166	4861	2623491	2640313	409740	4352	244	309725	277316	1564598	982	417604	9305	264738	49596	5679	565	761752	37279	3457	367797	2727920	119959	61585	10686394	226706	9452599
Nacl-j3-exp2-liver_1	87	2742	4855	489344	17590	10175	7738	1775	134244	438399	101749	27851015	94	322	102946	93074555	2490	1847	13552	22296	735066	14729	2219219	3949	2677383	1720686	696458	1541	223	220737	285797	1915087	1311	1183612	9155	207705	8709	6782	189	1258310	37822	1094	445740	2541799	107977	66461	13727712	328541	21855127
ATB-j7-exp1-liver_37	11	6895	7303	236670	13223	5685	11216	1055	192542	767239	59451	21761690	8	659	107877	124874259	81	1628	26499	30711	1242702	43040	2657816	6668	2274460	1786703	449791	313	370	217710	220922	1560424	104	744580	13797	245967	34757	6248	19	877713	67164	889	573821	5119401	94234	111842	11215302	271542	8432038
ATB-j3-exp2-liver_7	7	3169	5925	379106	21894	4070	7549	1948	147933	812503	60760	27437999	5	359	105400	125097450	105	2461	23297	37944	1364500	33196	2866248	5128	3001279	1293951	589350	668	308	230961	258016	1927922	108	682595	12802	266899	11206	5151	33	1082297	61039	1218	668666	5579671	85952	163358	13830875	485955	8917778
FRAGILIS-j3-exp1-liver_19	12	7246	8948	678688	13002	3630	8546	1632	164331	1595103	77601	16884731	11	852	78880	156738800	138	2023	23859	22317	947372	25623	1824259	7277	3268996	2697466	402604	722	513	385399	353039	1569925	65	557575	18041	338339	27546	7522	53	741701	55185	1937	417538	2828504	270553	93967	10752986	89601	12395994
MITSUAKI-j3-exp2-liver_19	10	1995	4721	538737	17196	2319	8679	2065	97496	555438	57889	18985060	8	477	86242	137745718	339	2282	43060	27446	641062	13471	1919731	5239	3212833	1373817	842132	268	355	358664	355451	1906606	230	696043	7729	172745	7295	5682	95	1537350	43336	771	279610	3917613	79984	34546	14067371	294916	8196725
ATB-j14-exp1-liver_63	14	6915	6017	343375	25305	9798	9373	1397	131048	459305	105507	18250145	2	811	114942	105342132	47	1876	17244	16454	788284	16803	1904675	5169	2671079	1766616	531209	350	287	250232	291723	1540123	25	824155	10047	226309	43145	5803	19	1003153	38796	1648	468093	3196873	109244	65873	11195637	325889	19672134
ATB-j7-exp1-liver_38	8	5772	7819	346199	15138	5445	8585	1183	152932	586168	78102	19036031	5	491	107735	124118051	28	1641	20141	22757	896956	20921	2082027	4834	3149009	1784685	383698	229	379	225153	237633	1550829	40	764650	9986	242149	24897	5482	26	757019	48077	843	445972	3628361	120039	90041	10714541	271010	13500470
ATB-j7-exp2-liver_31	9	3455	6931	313099	19207	6091	7081	1789	154925	624104	110871	29257167	14	364	74175	127303548	124	1971	52563	39612	854562	12927	3986206	5489	2939230	1599181	601871	391	255	320825	310544	1919654	98	832994	6873	186169	7140	6694	42	1086774	49938	1505	598639	5286726	118305	94014	13790167	238337	24858299
BARNECIELA-j7-exp1-liver_55	9	8504	5172	601445	17387	5541	9387	1833	167111	538893	113180	21350274	5	565	111943	132494611	187	1774	25361	21432	856252	24212	2965694	4668	1999303	2309006	391219	170	201	226353	249358	1537255	35	582740	11736	283631	41522	7167	18	738550	55624	1372	453092	3387005	157894	73728	10741715	264889	22489406
BURKO-j14-exp2-liver_55	4	2166	5994	735954	14645	3638	7321	1659	134333	864790	61657	18036737	9	431	84528	100028113	113	2073	22754	28704	749366	13797	2118043	4532	2067589	1772771	601573	998	331	213854	261441	1943918	536	761307	11240	261716	7721	5707	32	1220420	41414	1424	363134	3700007	147869	47443	13995204	212168	10599992
BARNECIELA-j3-exp1-liver_28	12	6066	5079	427311	8635	2628	7972	835	124959	809523	55537	16168726	8	677	79620	117808764	58	1633	16617	16180	559629	25420	1662548	10693	1974174	1251289	682045	357	350	336034	336620	1506102	34	477137	12254	219978	23558	4448	34	1342366	45705	1005	304760	2088670	130757	54342	10994202	129542	9031063
Nacl-j3-exp2-liver_6	3	3258	5720	422764	23485	12503	8447	1458	154791	516452	92144	27852261	8	581	84500	100167764	107	1995	25535	39452	1304915	22462	2056011	5483	2719446	1742812	1715320	939	445	256379	281396	1941781	106	490489	7296	367302	6834	5022	69	3121297	53346	1408	946180	3236564	112745	313877	13720475	636747	19155243
Nacl-j7-exp1-liver_34	67	3513	4036	379694	12254	2281	8332	1071	122674	546882	42660	12700284	7	597	113439	114674044	1473	1758	12745	11684	557262	12172	1828722	4702	1949394	1851668	1255449	790	265	268243	260942	1547895	553	572734	11206	178199	21515	5006	47	2399754	34603	750	225681	3352070	91277	22411	11403405	185658	5577279
ATB-j14-exp2-liver_54	4	2555	5046	270127	12402	11581	7690	1183	144897	430306	75568	22232983	6	444	73423	102968926	104	2269	18402	31911	723654	19681	1642290	4269	2612776	1681235	477160	857	278	205412	247524	1942049	126	697954	6132	289858	7296	3750	58	965219	45415	1747	400327	2073650	87639	99376	13604299	320296	15359849
Nacl-j3-exp1-liver_4	362	7208	7065	427585	9159	4801	9456	1132	162842	470930	58494	15895196	9	530	109172	165550237	2051	1594	16313	17322	717571	20007	2323201	4911	2244913	2785783	480026	4857	216	245229	277308	1535862	4639	425891	15581	439125	50811	7021	155	896243	40245	887	384775	2988968	180957	72398	10649643	246541	8308604
MITSUAKI-j14-exp2-liver_61	16	3200	7625	804431	16218	8461	7647	1553	164062	682801	103643	26867813	9	1208	71188	112160214	268	2255	22042	37334	1146902	25975	2276035	4489	2591537	2382205	512712	4952	421	232692	265709	1894158	261	516150	10295	397611	12097	6394	64	1054732	85192	1576	843583	3306919	300868	274768	13756107	213575	21285389
MITSUAKI-j3-exp2-liver_23	28	2923	4621	458393	10191	5443	6654	2303	173535	612991	71276	23791340	3	729	75653	119823084	107	2335	16579	35299	898229	25731	1932508	4915	2796697	1755814	2052629	2659	378	262889	250924	1947226	639	275637	8607	253336	5750	5427	56	3705946	58281	1297	655644	2241667	160371	301724	13774762	295697	14990627
BARNECIELA-j7-exp1-liver_59	7	7103	9058	726069	9456	4129	7986	1991	188495	1187623	68951	16788432	3	711	95269	165709833	58	1638	19038	26008	779697	29379	2029344	4349	2298340	3090727	351693	470	289	216455	227184	1515303	115	433304	16121	433428	28886	6675	20	665690	61764	1927	490673	2844171	205728	117109	11152499	239599	10201515
BURKO-j14-exp2-liver_60	7	3301	7958	584781	17821	4102	7564	2198	152864	352709	91516	26469759	11	506	80586	150534391	91	1910	19822	36058	714541	19113	1831829	4083	2242374	2581958	400128	1144	277	250256	287465	1947978	230	297212	6105	369555	5247	6858	39	830017	64420	1069	755294	3680966	148792	203663	13827141	622924	17889822
HIRAE-j7-exp1-liver_46	752	7367	4635	394151	11978	9962	7039	1178	152222	296107	75032	16338490	300	703	125083	95491439	1730	1834	10670	14385	632008	20780	1615776	3621	2094309	2485779	329235	27462	251	220428	221709	1516594	4495	563417	6942	220886	26213	5664	123	668563	28547	646	372454	2042315	145436	80348	10871172	230852	12722554
MITSUAKI-j7-exp2-liver_48	131	3801	8115	489617	20067	10838	8099	1911	189913	461109	103411	31178291	5	486	102273	127161615	1713	1906	18985	36804	669941	23521	2467883	4160	1948533	1896308	574914	5352	323	225989	266018	1882098	2327	670485	8014	288863	8180	6520	592	1192514	60895	1093	534609	3791083	142887	114278	13766376	394726	22354926
HIRAE-j3-exp1-liver_16	5	6503	3555	191014	6944	6954	5397	1576	124433	295169	44259	12590944	4	720	60848	77813748	91	1453	10100	12318	533919	14828	1271642	2649	1818864	1090041	322284	440	236	250530	231182	1513174	72	349271	5686	160332	8314	4027	33	605066	34722	637	309504	1569026	83014	71893	10948723	122663	7344877
BURKO-j7-exp2-liver_41	10	3554	7983	748717	19943	4534	9853	1559	170075	783916	111607	27823965	11	429	91726	135124023	1007	1897	25256	31180	863869	19830	2448046	5122	2490910	2847282	688981	583	272	270577	296264	1937214	150	860307	13754	253557	13755	9038	59	1232393	57652	1839	532390	2822725	145992	103967	13732992	230219	22439622
BARNECIELA-j3-exp1-liver_29	6	6635	5836	369625	7974	3302	6876	1606	137284	575788	60028	17726155	11	772	78558	115216498	39	1854	15334	16941	576880	28365	1459144	3673	1907942	1713404	446399	387	349	221755	220961	1529413	61	411086	11712	241543	20104	5032	26	906043	46204	1039	307661	1764618	110496	75076	10621265	199917	9142982
Nacl-j7-exp2-liver_30	63	2046	5884	497689	15874	6058	6091	1507	116808	365767	63231	18056255	8	394	76179	128944997	1051	1874	16125	26097	595847	12054	2155154	4742	2627984	1504799	637515	1478	307	266673	284999	1867650	1587	955701	8464	177228	4818	6002	128	1146857	42680	652	405833	3640324	87003	74162	13744416	228783	9990155
HIRAE-j3-exp1-liver_13	3	7469	10172	391693	7820	3250	8381	1590	193627	1103014	54271	16438355	5	936	97032	147282100	99	1945	20174	26209	827181	28829	1793821	3540	2623205	2385623	365881	524	344	294431	275949	1521329	75	151136	13078	311664	27835	5896	43	698116	70522	1743	530577	2004254	149751	147017	11225325	257419	8109039
MITSUAKI-j7-exp2-liver_43	164	2775	5977	392880	12008	3726	9794	1208	152264	527049	66610	20466466	492	465	58893	133985151	7205	2444	13108	22429	572283	23174	2000011	4250	1877318	2418965	763552	10030	259	215931	297182	1974797	5102	570448	9864	243844	4110	5153	397	1391335	40582	1772	293358	2484409	130767	43014	13682783	193214	11798190
HIRAE-j14-exp1-liver_69	32	7997	5051	579769	11847	3335	8852	1345	144961	307232	56950	15711467	113	777	101292	134951818	1008	1890	17837	17067	568939	17234	1938945	3640	2177315	2608626	385860	4252	303	248651	232334	1511687	1327	616088	11380	233615	72925	5757	152	723730	34423	903	257747	3037805	108473	41380	10613136	246123	7244944
ATB-j14-exp2-liver_49	5	2955	7888	444779	16146	9785	6536	1441	152442	559166	93283	27148327	5	414	108496	87928926	68	2097	17696	33344	883547	16190	2220372	6912	2195371	1808693	352638	383	291	219961	267033	1966329	34	465640	11140	278669	6203	7092	43	736435	46186	806	432871	2934235	104344	87715	13531971	201454	19010770
BARNECIELA-j14-exp1-liver_80	18	8729	4807	473008	31260	10830	8329	877	135845	462737	100494	18436235	8	663	96043	82234337	266	2159	15136	17701	801067	19114	1384770	3356	1642132	1377501	323170	524	364	203113	240665	1530086	282	301157	5449	246788	53283	5824	107	601565	31813	705	747074	3169924	115860	112056	10480013	207683	18314782
BURKO-j3-exp2-liver_17	12	1424	628	431002	4900	1759	9563	372	113779	2930443	37181	7616938	9	404	69849	52495278	50	1328	8354	15301	281476	11909	658444	2929	2698680	197549	4539124	202	203	334814	303305	1148875	211	674764	132110	60170650	1381	4145	87	7808418	24008	260	244287	1384529	135653	10706	985466	196953	5487460
BARNECIELA-j14-exp1-liver_83	5	10298	4607	451053	7164	2547	6302	1421	134560	542332	73757	18076664	6	622	68278	110165083	369	2001	11261	14161	616446	23870	2015992	3647	1935020	1601069	289826	1374	347	180117	219988	1497055	328	404932	7980	228837	33133	5222	33	552555	37145	773	328817	2317622	98320	56368	10675502	117261	12238783
MITSUAKI-j14-exp2-liver_66	10	3193	6135	508149	18577	3741	7736	2492	164491	557806	119591	30188527	7	358	75176	129750931	611	2325	51478	35762	815159	16950	2470240	4443	2206411	2094344	506397	454	199	238462	270507	1997269	305	697957	9735	348469	5881	7149	93	1047421	46629	1519	443753	2639066	115849	85353	13874050	197551	24038028
ATB-j3-exp1-liver_10	6	7233	8145	293936	11742	6653	7934	1494	179525	768846	77024	17297245	6	1055	77055	103364984	87	1963	21519	28017	1001391	41590	1579453	4715	1761555	1916322	430946	574	392	250818	259295	1508041	67	317370	8827	210944	28513	4291	21	826340	51308	926	655391	2390416	145614	142463	10972986	173408	13122065
HIRAE-j3-exp1-liver_14	9	5566	6119	334290	4442	2462	7958	1487	160551	664596	34485	12244522	4	656	73173	86626989	41	1615	11534	18882	642191	19617	1393495	4015	2883344	1254756	689551	177	235	245477	249824	1519078	50	213831	8596	147696	17261	4190	41	1395377	42199	1153	294315	1381990	93549	61750	10474261	158055	4848984
FRAGILIS-j14-exp1-liver_77	54	8442	8405	531307	13834	7623	7600	1210	155965	425429	96308	17457685	5	738	85086	93499970	4326	1593	12028	18038	713247	30498	1754949	3383	1560120	3301750	315126	3362	218	213690	231916	1555472	689	624670	11627	221305	35118	6181	117	612153	37513	595	420516	2506349	153059	77967	10151349	322099	16617051
ATB-j7-exp1-liver_40	7	6049	3729	194744	8703	14740	6911	1232	158744	261478	43187	12513779	5	638	91766	69050499	54	1975	14007	17497	759724	19866	908586	3527	2042427	1189503	327275	298	267	210228	216475	1523037	63	412149	6324	183333	16224	3108	27	707644	36377	349	295439	1657368	75164	62198	10471236	188743	5730176
Nacl-j3-exp1-liver_6	74	7919	6987	560539	11735	3265	9052	1308	156115	701870	61769	16591363	125	506	93251	133241849	2198	1960	13151	18675	762090	34626	2184282	4583	1857859	2552579	393893	3115	219	222826	228155	1472495	1324	411008	12166	364076	47842	7428	155	830192	43291	1323	336168	2471573	162608	51535	10541344	200213	9525835
ATB-j7-exp1-liver_42	3	7535	5685	385241	6687	3594	7318	1867	171650	645195	70622	19598492	7	1436	109892	98346216	253	1980	19305	22754	708806	26964	1541183	3460	1611570	1711074	633938	2571	388	201926	201388	1507009	111	208769	8011	189122	30183	5318	34	1279333	54014	668	576756	1627004	210867	169106	10952484	316120	12186591
HIRAE-j14-exp1-liver_68	343	5321	4612	399122	8902	5835	7089	1293	149295	327095	53027	8795261	11967	735	91824	75531841	2992	1882	11041	14066	530466	15094	812160	4718	2426323	1535858	327902	429728	130	263225	218583	1497067	13143	614645	8019	156827	59344	2672	1656	664838	22496	657	179747	1232078	169109	36131	10782061	387812	8907863
ATB-j3-exp1-liver_8	14	5316	6090	262765	5346	3429	6438	1729	158576	576971	38819	11187715	15	1001	80130	93150175	36	2192	18238	22013	663874	23687	1066397	3225	2016877	1380835	377901	534	290	210216	215552	1526411	68	173171	9315	265879	16021	3027	35	784232	43335	774	388296	1771224	92947	94410	10963094	346488	5339269
HIRAE-j7-exp1-liver_44	45	8107	4061	329526	16690	8342	6802	1540	138463	259431	73669	13452743	7	701	87499	90848888	986	2101	12820	14147	555389	16339	1432956	3373	1970620	1592831	282867	1244	285	220402	249600	1514305	499	617667	6992	202303	34125	4046	42	600368	25564	341	339492	2473771	114441	68557	10523423	179523	12463943
FRAGILIS-j3-exp1-liver_20	6	6442	5702	1368845	15772	3444	8137	1021	171471	1497256	63459	13181185	10	767	95883	136172619	254	1846	25935	19752	708182	34960	1568919	3667	2336704	3206738	497793	5109	297	308838	278043	1528615	132	543241	15537	203180	42336	5438	36	991528	43926	1532	278413	2451552	365983	34016	10879667	113258	10020129
BARNECIELA-j7-exp1-liver_56	33	6642	7025	445017	8152	10476	7896	1338	177483	341523	51001	12960043	5	666	84747	77882149	1338	1987	17015	16129	684459	19677	1435306	3679	2061045	1462812	451072	1714	254	228696	227217	1580012	578	516207	8706	151463	26993	3566	132	867074	34956	456	298393	1788604	84833	52670	10504999	649521	7872267
Nacl-j7-exp1-liver_36	66	7731	4081	424318	10641	4554	6590	1483	121135	368328	63035	16716297	8	648	97238	102281858	914	1900	11544	13645	466504	16916	1571234	6549	1875959	1629483	393226	423	245	264050	234799	1557111	605	683521	10772	227496	16002	4607	44	855265	33822	863	206847	1987213	129781	28828	10866270	133522	9745996
FRAGILIS-j3-exp1-liver_24	6	5281	5234	364762	5809	2845	7117	1484	99854	668237	36380	9242814	12	706	58301	95182903	45	1916	11363	15266	420178	18715	1027136	3454	1904834	1152643	686640	436	267	261938	256477	1565268	80	347721	11661	195627	9891	3097	27	1443647	31853	995	217380	1750559	109843	42829	11029578	86691	4801395
ATB-j14-exp1-liver_66	3	8195	4916	231772	14460	4150	7573	1535	118060	502687	105147	18571397	3	665	62032	90626703	39	1762	13648	20967	712111	19392	1805223	3578	2247898	1848737	497460	391	252	239766	234080	1585995	41	602431	8146	198540	30399	4017	23	987273	30723	1311	339599	2019204	112687	70232	10947950	238720	19901784
BARNECIELA-j14-exp1-liver_81	20	6260	6148	453435	16168	10845	8780	1250	129172	317184	85529	18956280	11	771	77214	78389467	273	1755	12178	16563	583366	14197	1903816	3685	1620491	1530224	906049	288	337	186152	232919	1611039	314	818485	4887	145242	39334	4707	39	1798776	38253	788	442020	3002483	73563	64231	10710603	198435	13291863
BARNECIELA-j3-exp1-liver_30	17	8308	5909	259013	9641	3001	6916	1472	138294	568213	61508	17793579	9	636	80287	105279372	31	1692	12557	20620	624751	26106	1800207	3355	1835730	1187253	558769	281	311	255172	222400	1603235	74	336108	8664	147038	16567	3027	45	1154119	40528	740	364199	1984006	114569	80787	10793458	120019	9979207
HIRAE-j7-exp1-liver_48	101	5929	4952	600402	16741	4781	8649	1383	173541	441847	99470	17686007	10	698	90484	102578056	807	1865	13319	18063	788699	11673	2221252	4209	1972376	2142799	821364	3632	341	223151	221011	1585563	1383	675962	6798	308109	62474	5733	241	1825077	41035	1482	375405	2705286	131513	63524	10601388	138305	16511823
HIRAE-j3-exp1-liver_18	7	10440	6626	262034	11995	9732	6505	2329	191132	484428	67732	21240037	3	691	79200	96524687	33	2065	18871	27427	973908	44221	2187570	3865	1911394	1698887	199866	519	337	275092	260317	1582362	95	303412	8598	161003	27680	5131	25	418525	61089	829	638046	2597802	105426	158464	11082885	206941	11612947
FRAGILIS-j14-exp1-liver_74	85	7632	8098	540646	9974	3438	9806	1438	150589	524308	67148	16516947	5	730	82865	150665705	2575	1862	15860	21144	666110	21395	2015468	4374	1969641	3144695	431206	4772	500	267924	264608	1575141	1356	520912	10239	265042	57289	7533	552	863217	49226	861	373530	3194032	151010	49161	11065594	215848	9086146
BARNECIELA-j3-exp1-liver_26	3	8417	6617	442244	9579	3937	7977	1247	159975	1011248	57690	16221443	2	830	77810	108773799	43	1811	15605	19923	763269	35525	1415812	3969	1924528	1427363	289479	203	394	296465	267187	1539756	48	492939	16810	230542	44778	3338	31	609312	46870	1631	203303	1869879	140926	52828	10829354	73836	8743794
FRAGILIS-j7-exp1-liver_50	4	2331	402	186088	3296	1586	7649	1326	101814	1954410	18326	3976709	7	593	45077	19459724	24	1307	7575	24641	228106	14353	310694	2439	1874879	94033	1239098	82	175	132192	151550	920195	68	350931	187229	49106400	1035	1966	21	2700254	15005	134	183076	635746	96396	7281	996428	1270122	2368681
FRAGILIS-j7-exp1-liver_52	34	8155	6298	165904	7384	12228	4299	1285	98127	193481	54319	14818872	10	950	48647	30270005	755	2186	16763	15625	583470	28166	1026116	3213	2253103	1311535	400559	4145	346	177690	263036	1577620	904	462999	5470	126931	49703	2336	471	841817	27454	426	251275	2593260	89580	59705	11337688	83798	7599004
BARNECIELA-j7-exp1-liver_60	11	2503	2214	422061	4277	1805	5417	1920	52163	299187	30507	6961201	4	682	55005	44367297	996	1554	11895	8143	216685	8331	1702334	1988	1795380	989717	1376268	938	176	203558	230927	1451508	481	261528	4449	183670	3732	4655	40	2751175	14625	449	77955	1023908	55612	11316	9008887	123110	4066368
Nacl-j7-exp1-liver_32	58	5458	6605	667603	5621	2670	7177	1329	151464	812043	49216	12169614	3	649	87280	129586044	1068	1829	16055	16659	453738	17401	1360279	3926	1800039	2312236	386007	619	280	228738	211497	1525358	242	300072	11630	254182	33435	5321	67	845100	35533	875	248779	1877857	131615	46747	10707060	247550	7294933
BARNECIELA-j14-exp1-liver_82	105	6544	5918	532348	14597	3907	7450	1245	137730	565900	83154	18960867	7	707	100447	92762391	1252	1946	11055	16147	658228	17470	2228814	3511	2041822	3066176	778600	1097	315	206954	240022	1514346	624	665788	7303	177746	72384	6230	102	1630306	35043	1070	315075	2924800	148108	51728	10297390	154131	12626210
ATB-j3-exp1-liver_12	8	11222	7980	287566	8395	4117	7481	1314	195351	579456	89294	22780432	5	1051	82031	146042865	71	2044	77238	37222	1052824	40093	2190085	4212	1557137	2109981	163927	816	427	194662	200415	1505006	154	355617	8392	270362	32384	4945	28	353335	62477	1446	556664	2756451	141998	140615	10863816	105778	15125825
HIRAE-j14-exp1-liver_70	83	7214	6126	327534	10513	6618	5471	1802	141698	264419	59174	16710680	9	693	71239	66403854	4386	2234	11125	15887	702461	33203	997077	4367	1420034	1174160	319810	4646	300	178661	183060	1554353	1293	502449	7189	176711	50001	3269	189	695529	33798	4916	387317	2235813	87369	69751	11048491	197771	8788935
St_SCFA-exp2-liver_pre	NA	NA	33223	NA	NA	17687	NA	NA	NA	NA	NA	NA	NA	2437	NA	NA	NA	NA	NA	NA	NA	NA	NA	NA	NA	NA	NA	NA	14643	NA	NA	NA	NA	NA	NA	NA	NA	NA	NA	NA	NA	NA	NA	NA	NA	NA	NA	NA	NA
St_PA-exp3-liver_pre	NA	NA	NA	NA	NA	NA	NA	NA	NA	NA	NA	NA	NA	NA	NA	NA	NA	NA	NA	NA	NA	NA	NA	NA	NA	NA	NA	NA	NA	NA	NA	NA	NA	NA	NA	NA	NA	NA	NA	NA	NA	NA	NA	NA	NA	NA	NA	NA	NA
St_BA1-exp3-liver_pre	455	NA	NA	NA	NA	NA	NA	NA	NA	NA	NA	NA	25268	NA	NA	NA	1808	NA	NA	NA	NA	NA	NA	NA	NA	NA	NA	1322	NA	NA	NA	NA	36176	NA	NA	NA	NA	NA	93810	NA	NA	NA	NA	NA	NA	NA	NA	NA	NA
St_AA_exp3-liver_pre	NA	110	NA	716	5049	NA	4449	272	62	840942	2116	131207	NA	NA	2801	3198648	NA	46	207	362	2687	37	121190	1465	392875	1474567	7166991	NA	NA	95290	81699	527	NA	22672228	33669	75566	2941	609	NA	12775277	813	54	2349	712305	587615	607	536	24	199362
St_BA2-exp3-liver_pre	17650	NA	NA	NA	NA	NA	NA	NA	NA	NA	NA	NA	147	NA	NA	NA	27714	NA	NA	NA	NA	NA	NA	NA	NA	NA	NA	144136	NA	NA	NA	NA	921	NA	NA	NA	NA	NA	5588	NA	NA	NA	NA	NA	NA	NA	NA	NA	NA
St_SCFA-exp2-liver_post	NA	NA	38057	NA	NA	21373	NA	NA	NA	NA	NA	NA	NA	1106	NA	NA	NA	NA	NA	NA	NA	NA	NA	NA	NA	NA	NA	NA	15183	NA	NA	NA	NA	NA	NA	NA	NA	NA	NA	NA	NA	NA	NA	NA	NA	NA	NA	NA	NA
St_PA-exp3-liver_post	NA	NA	NA	NA	NA	NA	NA	NA	NA	NA	NA	NA	NA	NA	NA	NA	NA	NA	NA	NA	NA	NA	NA	NA	NA	NA	NA	NA	NA	NA	NA	NA	NA	NA	NA	NA	NA	NA	NA	NA	NA	NA	NA	NA	NA	NA	NA	NA	NA
St_SCFA-exp3-liver_pre	NA	NA	38158	NA	NA	18910	NA	NA	NA	NA	NA	NA	NA	3608	NA	NA	NA	NA	NA	NA	NA	NA	NA	NA	NA	NA	NA	NA	15565	NA	NA	NA	NA	NA	NA	NA	NA	NA	NA	NA	NA	NA	NA	NA	NA	NA	NA	NA	NA
St_PA-exp1-liver_pre	NA	NA	NA	NA	NA	NA	NA	NA	NA	NA	NA	NA	NA	NA	NA	NA	NA	NA	NA	NA	NA	NA	NA	NA	NA	NA	NA	NA	NA	NA	NA	NA	NA	NA	NA	NA	NA	NA	NA	NA	NA	NA	NA	NA	NA	NA	NA	NA	NA
St_AA_exp3-liver_post	NA	138	NA	913	36409	NA	5090	186	378	1055607	1949	173093	NA	NA	5201	3691339	NA	69	319	476	5281	115	168701	1361	164752	1828026	8812745	NA	NA	108168	81795	717	NA	28500800	51602	85349	9314	851	NA	16376185	1298	53	4088	1181836	725558	618	7505	55	338158
St_AA-exp1-liver_pre	NA	220	NA	1699	6201	NA	2626	337	19	756757	1359	127808	NA	NA	1110	2533148	NA	64	362	341	1647	102	117419	8319	2317604	920830	4296039	NA	NA	303849	238060	1251	NA	28367336	21866	81500	461	459	NA	7917939	481	36	3917	642405	523005	824	1720	11	196877
St_BA2-exp3-liver_post	17757	NA	NA	NA	NA	NA	NA	NA	NA	NA	NA	NA	28	NA	NA	NA	5762	NA	NA	NA	NA	NA	NA	NA	NA	NA	NA	135761	NA	NA	NA	NA	633	NA	NA	NA	NA	NA	2898	NA	NA	NA	NA	NA	NA	NA	NA	NA	NA
St_BA1-exp3-liver_post	434	NA	NA	NA	NA	NA	NA	NA	NA	NA	NA	NA	26675	NA	NA	NA	1523	NA	NA	NA	NA	NA	NA	NA	NA	NA	NA	643	NA	NA	NA	NA	33704	NA	NA	NA	NA	NA	61253	NA	NA	NA	NA	NA	NA	NA	NA	NA	NA
St_BA1-exp2-liver_pre	459	NA	NA	NA	NA	NA	NA	NA	NA	NA	NA	NA	24561	NA	NA	NA	1145	NA	NA	NA	NA	NA	NA	NA	NA	NA	NA	623	NA	NA	NA	NA	33816	NA	NA	NA	NA	NA	53471	NA	NA	NA	NA	NA	NA	NA	NA	NA	NA
St_BA2-exp2-liver_pre	17047	NA	NA	NA	NA	NA	NA	NA	NA	NA	NA	NA	21	NA	NA	NA	940	NA	NA	NA	NA	NA	NA	NA	NA	NA	NA	124459	NA	NA	NA	NA	572	NA	NA	NA	NA	NA	2505	NA	NA	NA	NA	NA	NA	NA	NA	NA	NA
St_SCFA-exp3-liver_post	NA	NA	35263	NA	NA	17354	NA	NA	NA	NA	NA	NA	NA	1808	NA	NA	NA	NA	NA	NA	NA	NA	NA	NA	NA	NA	NA	NA	14364	NA	NA	NA	NA	NA	NA	NA	NA	NA	NA	NA	NA	NA	NA	NA	NA	NA	NA	NA	NA
St_SCFA-exp1-liver_pre	NA	NA	26636	NA	NA	17867	NA	NA	NA	NA	NA	NA	NA	3258	NA	NA	NA	NA	NA	NA	NA	NA	NA	NA	NA	NA	NA	NA	14452	NA	NA	NA	NA	NA	NA	NA	NA	NA	NA	NA	NA	NA	NA	NA	NA	NA	NA	NA	NA
St_BA2-exp2-liver_post	16486	NA	NA	NA	NA	NA	NA	NA	NA	NA	NA	NA	116	NA	NA	NA	2349	NA	NA	NA	NA	NA	NA	NA	NA	NA	NA	119448	NA	NA	NA	NA	548	NA	NA	NA	NA	NA	2864	NA	NA	NA	NA	NA	NA	NA	NA	NA	NA
St_BA1-exp2-liver_post	382	NA	NA	NA	NA	NA	NA	NA	NA	NA	NA	NA	24742	NA	NA	NA	1841	NA	NA	NA	NA	NA	NA	NA	NA	NA	NA	716	NA	NA	NA	NA	33459	NA	NA	NA	NA	NA	46211	NA	NA	NA	NA	NA	NA	NA	NA	NA	NA
St_BA1-exp1-liver_pre	347	NA	NA	NA	NA	NA	NA	NA	NA	NA	NA	NA	23051	NA	NA	NA	NA	NA	NA	NA	NA	NA	NA	NA	NA	NA	NA	438	NA	NA	NA	NA	29503	NA	NA	NA	NA	NA	41658	NA	NA	NA	NA	NA	NA	NA	NA	NA	NA
St_BA2-exp1-liver_pre	16711	NA	NA	NA	NA	NA	NA	NA	NA	NA	NA	NA	12	NA	NA	NA	3725	NA	NA	NA	NA	NA	NA	NA	NA	NA	NA	118487	NA	NA	NA	NA	514	NA	NA	NA	NA	NA	1928	NA	NA	NA	NA	NA	NA	NA	NA	NA	NA
St_AA-exp1-liver_post	NA	NA	NA	1102	28303	NA	3433	307	418	775527	1619	140306	NA	NA	2897	3598594	NA	75	540	380	5966	74	121843	1219	483692	1486568	4104602	NA	NA	164096	183665	1658	NA	28507801	28782	72534	2644	259	NA	8799211	534	85	5261	895092	537414	592	9814	91	228222
St_PA-exp1-liver_post	NA	NA	NA	NA	NA	NA	NA	NA	NA	NA	NA	NA	NA	NA	NA	NA	NA	NA	NA	NA	NA	NA	NA	NA	NA	NA	NA	NA	NA	NA	NA	NA	NA	NA	NA	NA	NA	NA	NA	NA	NA	NA	NA	NA	NA	NA	NA	NA	NA
St_AA_exp2-liver_pre	NA	137	NA	1175	3401	NA	3074	311	5	548011	1753	94671	NA	NA	927	2738483	NA	49	84	300	1774	32	88302	4770	2936379	912322	5132963	NA	NA	156279	152410	586	NA	28510057	14517	60367	283	244	NA	9484450	251	64	9951	477769	436247	175	1067	14	147698
St_PA-exp2-liver_pre	NA	NA	NA	NA	NA	NA	NA	NA	NA	NA	NA	NA	NA	NA	NA	NA	NA	NA	NA	NA	NA	NA	NA	NA	NA	NA	NA	NA	NA	NA	NA	NA	NA	NA	NA	NA	NA	NA	NA	NA	NA	NA	NA	NA	NA	NA	NA	NA	NA
St_SCFA-exp1-liver_post	NA	NA	33644	NA	NA	21285	NA	NA	NA	NA	NA	NA	NA	2120	NA	NA	NA	NA	NA	NA	NA	NA	NA	NA	NA	NA	NA	NA	15716	NA	NA	NA	NA	NA	NA	NA	NA	NA	NA	NA	NA	NA	NA	NA	NA	NA	NA	NA	NA
St_PA-exp2-liver_post	NA	NA	NA	NA	NA	NA	NA	NA	NA	NA	NA	NA	NA	NA	NA	NA	NA	NA	NA	NA	NA	NA	NA	NA	NA	NA	NA	NA	NA	NA	NA	NA	NA	NA	NA	NA	NA	NA	NA	NA	NA	NA	NA	NA	NA	NA	NA	NA	NA
St_AA_exp2-liver_post	NA	661	NA	1123	20556	NA	4225	418	305	674085	1395	111591	NA	NA	1071	5233520	NA	180	223	459	5303	31	89348	1094	310214	1487215	6519528	NA	NA	85683	139864	541	NA	37950642	6517	58678	676	532	NA	11785682	207	23	16517	826776	557747	505	6009	57	171478
St_BA2-exp1-liver_post	16444	NA	NA	NA	NA	NA	NA	NA	NA	NA	NA	NA	93	NA	NA	NA	3011	NA	NA	NA	NA	NA	NA	NA	NA	NA	NA	114755	NA	NA	NA	NA	497	NA	NA	NA	NA	NA	1708	NA	NA	NA	NA	NA	NA	NA	NA	NA	NA
St_BA1-exp1-liver_post	382	NA	NA	NA	NA	NA	NA	NA	NA	NA	NA	NA	21446	NA	NA	NA	1013	NA	NA	NA	NA	NA	NA	NA	NA	NA	NA	490	NA	NA	NA	NA	26900	NA	NA	NA	NA	NA	28249	NA	NA	NA	NA	NA	NA	NA	NA	NA	NA
[truncated: 94 more columns]

## Sheet: AreaQCCorr
Sid	12-dehydrocholic acid@5.28-ba	2-aminoadipic acid@15.22-gc	2-hydroxybutyric acid@2.50-sf	2-hydroxyglutaric acid@12.99-gc	2-oxoglutaric acid@13.00-gc	3-hydroxybutyric acid@1.66-sf	3-hydroxyisovaleric acid@7.82-gc	3-methylhistidine@16.86-gc	4-hydroxymandelic acid@15.21-gc	4-hydroxyproline@12.43-gc	5-aminovaleric acid@13.51-gc	5-oxoproline@12.34-gc	7,12-dihydroxy-3-oxocholanoic acid@7.06-ba	Acetic acid@1.80-sf	Adenine@16.17-gc	Alanine@6.92-gc	Alpha-muricholic acid@5.88-ba	Alpha-tocopherol@29.51-gc	Arabinose@14.16-gc	Arabitol@14.80-gc	Arachidonic acid@23.72-gc	Asparagine@14.11-gc	Aspartic acid@12.36-gc	Behenic acid@26.39-gc	Benzoic acid@8.76-gc	Beta-alanine@11.15-gc	Beta-hydroxypyruvic acid@5.43-gc	Beta-muricholic acid@6.15-ba	Butanoic acid@5.31-sf	Capric acid@11.44-gc	Caprylic acid@8.95-gc	Cholesterol@29.51-gc	Cholic acid@9.07-ba	Citric acid;Isocitric acid@15.79-gc	Citrulline@15.76-gc	Creatine@12.79-gc	Cystine;Cysteine@22.97-gc	Cytosine@12.37-gc	Deoxycholic acid@10.46-ba	Dimethylglycine@5.43-gc	Erythritol@12.29-gc	Ferulic acid@19.16-gc	Fructose@16.47-gc	Fumaric acid@10.07-gc	GABA@12.43-gc	Galactitol;Sorbitol;Mannitol@17.27-gc	Galactose;Glucose;Mannose@17.00-gc	Glucose-6-phosphate;Fructose-6-phosphate@23.79-gc	Glutamic acid@13.51-gc
BlM-exp2-liver_pre	NA	NA	181.692	NA	NA	195.069	NA	NA	NA	NA	NA	NA	NA	6371.14	NA	NA	NA	NA	NA	NA	NA	NA	NA	NA	NA	NA	NA	NA	2028.605	NA	NA	NA	NA	NA	NA	NA	NA	NA	NA	NA	NA	NA	NA	NA	NA	NA	NA	NA	NA
BlM_exp3-liver_pre	98.507	74.436	NA	899.889	62.094	NA	2949.616	114.548	10.802	921.775	123.835	85499.682	261.561	NA	1383.696	209839.24	1151.888	4.156	243.542	848.947	14959.442	444.484	4081.14	1095.679	3915443.148	1788.518	2383768.431	1255.081	NA	237851.681	335068.1	319.462	1419.929	27297.574	14.035	605.332	96.534	447.921	162.423	4469903.078	1154.345	195.003	2369.96	16177.849	732.155	1698.515	137.591	37.331	6456.997
BlM-exp2-liver_post	NA	NA	125.873	NA	NA	699.615	NA	NA	NA	NA	NA	NA	NA	2375.272	NA	NA	NA	NA	NA	NA	NA	NA	NA	NA	NA	NA	NA	NA	1283.363	NA	NA	NA	NA	NA	NA	NA	NA	NA	NA	NA	NA	NA	NA	NA	NA	NA	NA	NA	NA
BlM_exp3-liver_post	77.321	46.094	NA	1288.541	148.64	NA	4441.169	222.175	760.133	1214.764	174.659	135573.295	74.373	NA	8083.062	796918.833	47.108	314.307	709.939	1151.072	70056.731	931.37	4479.977	2140.859	4344427.777	4337.855	2517702.029	210.987	NA	323061.51	432662.83	633.773	658.138	4665.705	153.2	843.317	219.167	1221.47	249.252	4703845.123	1850.565	97.508	5544.669	13667.114	754.267	2623.163	12345.803	152.157	17425.09
BlM-exp3-liver_pre	NA	NA	206.982	NA	NA	19.208	NA	NA	NA	NA	NA	NA	NA	4768.972	NA	NA	NA	NA	NA	NA	NA	NA	NA	NA	NA	NA	NA	NA	1137.734	NA	NA	NA	NA	NA	NA	NA	NA	NA	NA	NA	NA	NA	NA	NA	NA	NA	NA	NA	NA
Bl_matrice-exp1-liver_3a	NA	NA	NA	NA	NA	NA	NA	NA	NA	NA	NA	NA	NA	NA	NA	NA	NA	NA	NA	NA	NA	NA	NA	NA	NA	NA	NA	NA	NA	NA	NA	NA	NA	NA	NA	NA	NA	NA	NA	NA	NA	NA	NA	NA	NA	NA	NA	NA	NA
Bl_matrice-exp2-liver_pre	49.066	NA	NA	NA	NA	NA	NA	NA	NA	NA	NA	NA	32.761	NA	NA	NA	68.398	NA	NA	NA	NA	NA	NA	NA	NA	NA	NA	56.806	NA	NA	NA	NA	226.602	NA	NA	NA	NA	NA	443.009	NA	NA	NA	NA	NA	NA	NA	NA	NA	NA
BlM_exp1-liver_pre	23.372	22.848	NA	1986.674	111.3	NA	3369.88	53.222	19.276	612.061	139.035	100988.48	1.744	NA	104.189	387478.336	72.484	37.555	151.606	41.144	3286.854	733.33	2941.741	4328.621	3444963.79	2845.508	2762858.187	44.17	NA	363707.808	406625.5	288.637	513.119	182617.981	188.755	307.261	67.506	215.471	451.497	5713992.776	151.408	9.199	8874.502	19946.148	868.979	512.611	989.328	18.418	5073.796
BlM-exp3-liver_post	NA	NA	93.425	NA	NA	277.377	NA	NA	NA	NA	NA	NA	NA	2715.198	NA	NA	NA	NA	NA	NA	NA	NA	NA	NA	NA	NA	NA	NA	993.334	NA	NA	NA	NA	NA	NA	NA	NA	NA	NA	NA	NA	NA	NA	NA	NA	NA	NA	NA	NA
BlM-exp1-liver_pre	NA	NA	141.961	NA	NA	155.033	NA	NA	NA	NA	NA	NA	NA	3953.354	NA	NA	NA	NA	NA	NA	NA	NA	NA	NA	NA	NA	NA	NA	1187.056	NA	NA	NA	NA	NA	NA	NA	NA	NA	NA	NA	NA	NA	NA	NA	NA	NA	NA	NA	NA
Bl_matrice-exp2-liver_post	41.898	NA	NA	NA	NA	NA	NA	NA	NA	NA	NA	NA	20.067	NA	NA	NA	160.08	NA	NA	NA	NA	NA	NA	NA	NA	NA	NA	50.176	NA	NA	NA	NA	418.789	NA	NA	NA	NA	NA	180.055	NA	NA	NA	NA	NA	NA	NA	NA	NA	NA
Bl_matrice-exp1-liver_3b	NA	NA	NA	NA	NA	NA	NA	NA	NA	NA	NA	NA	NA	NA	NA	NA	NA	NA	NA	NA	NA	NA	NA	NA	NA	NA	NA	NA	NA	NA	NA	NA	NA	NA	NA	NA	NA	NA	NA	NA	NA	NA	NA	NA	NA	NA	NA	NA	NA
BlM_pre-exp2-liver	NA	106.962	NA	906.696	37.424	NA	63.956	149.848	78.366	182.101	558.515	31093.339	NA	NA	123.209	135531.049	NA	92.208	313.537	715.425	318681.758	65.537	277.866	2127.661	438704.662	3295.844	6372111.56	NA	NA	22549.275	143417.661	723.345	NA	3671.225	60.93	72.827	472.19	25.752	NA	87991.794	522.772	15.301	3252.446	4730.099	73.624	1219.63	2319.511	32.29	1347.214
BlM_exp2-liver_pre	NA	NA	NA	NA	NA	NA	NA	NA	NA	NA	NA	NA	NA	NA	NA	NA	NA	NA	NA	NA	NA	NA	NA	NA	NA	NA	NA	NA	NA	NA	NA	NA	NA	NA	NA	NA	NA	NA	NA	NA	NA	NA	NA	NA	NA	NA	NA	NA	NA
BlM_exp1-liver_post	21.279	69.804	NA	964.276	95.133	NA	3798.3	137.246	947.707	934.742	80.592	112396.397	12.335	NA	3795.945	701098.375	55.393	47.859	420.844	409.478	57815.859	1233.754	2595.313	1895.383	2557447.975	3733.43	2617638.103	51.631	NA	302446.193	404417.689	1420.119	302.19	10478.489	29.107	2433.354	173.924	785.309	189.302	5281086.749	554.935	45.293	14740.697	13659.604	698.672	1102.796	12594.398	72.716	7712.003
BlM-exp1-liver_post	NA	NA	73.287	NA	NA	329.507	NA	NA	NA	NA	NA	NA	NA	4212.753	NA	NA	NA	NA	NA	NA	NA	NA	NA	NA	NA	NA	NA	NA	1109.777	NA	NA	NA	NA	NA	NA	NA	NA	NA	NA	NA	NA	NA	NA	NA	NA	NA	NA	NA	NA
BlM_exp2-liver_post	NA	NA	NA	NA	NA	NA	NA	NA	NA	NA	NA	NA	NA	NA	NA	NA	NA	NA	NA	NA	NA	NA	NA	NA	NA	NA	NA	NA	NA	NA	NA	NA	NA	NA	NA	NA	NA	NA	NA	NA	NA	NA	NA	NA	NA	NA	NA	NA	NA
BlM_post-exp2-liver	NA	253.897	NA	1542.817	137.101	NA	106.681	130.263	144.098	229.835	741.101	22352.153	NA	NA	1020.385	236383.543	NA	22.825	276.049	643.389	27032.276	135.443	531.477	1101.52	1109315.144	3062.85	6096292.741	NA	NA	59860.708	190675.395	807.712	NA	3233.456	73.178	167.599	628.641	4.033	NA	534803.779	296.023	120.502	2181.336	5294.641	186.634	1028.387	2330.152	25.359	1614.984
QC-exp2-liver_5a	NA	NA	57672.644	NA	NA	50476.885	NA	NA	NA	NA	NA	NA	NA	7713.921	NA	NA	NA	NA	NA	NA	NA	NA	NA	NA	NA	NA	NA	NA	5960.55	NA	NA	NA	NA	NA	NA	NA	NA	NA	NA	NA	NA	NA	NA	NA	NA	NA	NA	NA	NA
QC_exp3-liver_5a	250.152	12255.985	NA	898155.028	30459.175	NA	12932.578	1777.498	287284.169	1195237.701	142293.947	40768890.644	166.861	NA	226612.21	202501328.739	4479.445	4006.119	42645.648	49974.602	2708001.867	54973.52	3081513.283	9161.264	3998274.947	3495769.825	526925.977	24184.775	NA	411434.581	434823.819	3505622.556	3738.808	1026353.367	19186.363	776762.48	83718.446	11225.487	597.417	971851.607	91817.238	3235.278	1479064.692	4922290.149	254796.567	411144.601	40149343.616	776116.341	25669029.876
QC_exp123-liver_6a	314.403	NA	NA	NA	NA	NA	NA	NA	NA	NA	NA	NA	170.902	NA	NA	NA	7059.357	NA	NA	NA	NA	NA	NA	NA	NA	NA	NA	57169.899	NA	NA	NA	NA	4823.575	NA	NA	NA	NA	NA	543.902	NA	NA	NA	NA	NA	NA	NA	NA	NA	NA
QC_exp3-liver_5b	202.933	12449.406	NA	940211.349	31663.148	NA	14249.137	1829.569	290880.469	1247253.226	156350.064	43325132.007	57.11	NA	247047.702	190020136.329	4738.976	4632.725	40150.014	55525.205	2527807.722	50224.15	3328121.551	7534.18	3972142.405	3631285.339	565180.436	24426.115	NA	432073.708	458140.012	3524208.024	4413.789	1081401.082	21085.709	811429.312	84038.044	12077.271	1102.808	1110077.277	96553.322	3625.058	1582547.849	5074954.884	252661.163	440964.993	40610739.421	830908.739	26209881.597
QC-exp2-liver_5b	NA	NA	58777.873	NA	NA	52787.138	NA	NA	NA	NA	NA	NA	NA	6536.625	NA	NA	NA	NA	NA	NA	NA	NA	NA	NA	NA	NA	NA	NA	6366.215	NA	NA	NA	NA	NA	NA	NA	NA	NA	NA	NA	NA	NA	NA	NA	NA	NA	NA	NA	NA
QC-exp2-liver_5c	NA	NA	53413.527	NA	NA	51881.164	NA	NA	NA	NA	NA	NA	NA	6353.977	NA	NA	NA	NA	NA	NA	NA	NA	NA	NA	NA	NA	NA	NA	5262.294	NA	NA	NA	NA	NA	NA	NA	NA	NA	NA	NA	NA	NA	NA	NA	NA	NA	NA	NA	NA
QC_exp3-liver_5c	227	13233.512	NA	973076.775	33293.415	NA	15543.071	2372.43	300254.719	1296110.704	140553.631	40429660.457	171.104	NA	252784.686	189253223.081	4875.305	4168.039	44648.904	58696.233	2675462.196	59891.321	3396604.851	8232.822	4075508.484	4000448.309	591853.52	24359.321	NA	456807.143	488151.651	3807482.576	4768.68	1149153.687	22758.38	766154.538	89466.057	12670.681	672.291	1142893.302	105828.516	3310.442	1663593.879	5379026.613	286564.742	451745.268	41474979.308	848140.813	28301638.148
QC-exp2-liver_5d	NA	NA	47859.446	NA	NA	51040.732	NA	NA	NA	NA	NA	NA	NA	5386.915	NA	NA	NA	NA	NA	NA	NA	NA	NA	NA	NA	NA	NA	NA	4667.685	NA	NA	NA	NA	NA	NA	NA	NA	NA	NA	NA	NA	NA	NA	NA	NA	NA	NA	NA	NA
QC_exp3-liver_6a	NA	14284.249	NA	915262.704	31606.21	NA	13449.086	2554.842	284828.135	1247098.905	147027.365	39412168.028	NA	NA	236007.504	187710849.539	NA	4136.061	44341.45	49986.236	2242489.835	65494.21	3219078.119	7495.375	3846819.421	3631424.407	540117.695	NA	NA	408176.482	432055.413	3588874.486	NA	1021862.504	22204.272	837645.658	95414.219	10876.035	NA	1024210.69	87634.284	3206.442	1550636.671	4963614.15	259484.655	442128.641	39873037.643	790074.244	25531788.574
QC-exp2-liver_5e	NA	NA	48340.673	NA	NA	50758.48	NA	NA	NA	NA	NA	NA	NA	4956.108	NA	NA	NA	NA	NA	NA	NA	NA	NA	NA	NA	NA	NA	NA	4760.727	NA	NA	NA	NA	NA	NA	NA	NA	NA	NA	NA	NA	NA	NA	NA	NA	NA	NA	NA	NA
QC_exp3-liver_6b	NA	13436.756	NA	928895.417	31550.595	NA	13938.177	2144.568	289535.946	1220530.751	148276.493	39232291.493	NA	NA	233732.092	193688230.915	NA	4458.577	41103.783	48731.488	2357391.757	56413.854	3145097.703	7703.862	3891666.142	3723036.55	553768.72	NA	NA	419606.888	456682.817	3465347.483	NA	1049083.95	21621.524	774397.515	89212.341	11815.77	NA	1047512.212	95460.696	3175.37	1576919.647	5052830.434	262019.77	439007.691	40145066.781	811625.843	26421411.04
QC_exp3-liver_5d	149.48	14795.136	NA	966386.557	34019.128	NA	17207.181	3069.539	309362.59	1284658.09	146620.632	43041447.315	146.683	NA	257318.067	190898397.792	4856.256	4179.167	42742.078	72752.238	3495369.403	57986.076	3393779.434	11810.28	4269675.698	3937628.211	707732.18	24335.207	NA	491812.068	512015.195	3715763.194	5146.28	1181483.749	23591.723	610099.237	116112.666	13253.284	853.364	1364540.146	110914.86	4410.819	1645058.377	5494442.121	279887.608	472048.635	41047572.368	839617.005	27984581.693
QC_exp3-liver_5e	236.987	NA	NA	NA	NA	NA	NA	NA	NA	NA	NA	NA	68.415	NA	NA	NA	4603.498	NA	NA	NA	NA	NA	NA	NA	NA	NA	NA	24173.677	NA	NA	NA	NA	5073.021	NA	NA	NA	NA	NA	582.953	NA	NA	NA	NA	NA	NA	NA	NA	NA	NA
QC-exp2-liver_5f	NA	NA	47700.582	NA	NA	51199.887	NA	NA	NA	NA	NA	NA	NA	4662.421	NA	NA	NA	NA	NA	NA	NA	NA	NA	NA	NA	NA	NA	NA	4760.902	NA	NA	NA	NA	NA	NA	NA	NA	NA	NA	NA	NA	NA	NA	NA	NA	NA	NA	NA	NA
QC_exp3-liver_6c	NA	13396.583	NA	935526.455	33542.166	NA	14596.191	1280.881	292480.09	1240398.847	148861.164	40195568.639	NA	NA	242820.827	196420591.423	NA	3924.065	41646.835	53209.51	2815334.678	52698.72	3244310.016	8806.982	3998733.996	3782152.821	546431.947	NA	NA	445115.342	457548.289	3478555.266	NA	1070453.832	20838.523	719861.613	101613.998	12724.669	NA	1050986.063	101306.298	3642.365	1600181.402	5125040.943	271921.52	442213.179	40163967.93	819760.129	26673350.008
QC_exp3-liver_5f	424.047	NA	NA	NA	NA	NA	NA	NA	NA	NA	NA	NA	153.827	NA	NA	NA	4861.751	NA	NA	NA	NA	NA	NA	NA	NA	NA	NA	22656.103	NA	NA	NA	NA	4329.77	NA	NA	NA	NA	NA	663.792	NA	NA	NA	NA	NA	NA	NA	NA	NA	NA
QC-exp2-liver_5g	NA	NA	48668.579	NA	NA	51087.798	NA	NA	NA	NA	NA	NA	NA	4953.253	NA	NA	NA	NA	NA	NA	NA	NA	NA	NA	NA	NA	NA	NA	4348.883	NA	NA	NA	NA	NA	NA	NA	NA	NA	NA	NA	NA	NA	NA	NA	NA	NA	NA	NA	NA
QC_exp3-liver_5g	145.887	NA	NA	NA	NA	NA	NA	NA	NA	NA	NA	NA	52.598	NA	NA	NA	4582.278	NA	NA	NA	NA	NA	NA	NA	NA	NA	NA	8060.95	NA	NA	NA	NA	2053.469	NA	NA	NA	NA	NA	360.83	NA	NA	NA	NA	NA	NA	NA	NA	NA	NA
QC_exp123-liver_6b	74.202	NA	NA	NA	NA	NA	NA	NA	NA	NA	NA	NA	171.878	NA	NA	NA	6380.097	NA	NA	NA	NA	NA	NA	NA	NA	NA	NA	51104.325	NA	NA	NA	NA	5130.697	NA	NA	NA	NA	NA	742.66	NA	NA	NA	NA	NA	NA	NA	NA	NA	NA
QC_exp3-liver_6d	NA	14005.646	NA	939315.075	31183.743	NA	13942.209	2342.437	307203.423	1273333.729	142912.775	43160696.046	NA	NA	241472.389	189893256.92	NA	4571.717	43744.474	69890.124	2974292.096	56155.501	3326318.585	8688.089	4118168.639	3783861.137	540027.936	NA	NA	445149.277	456241.412	3589266.784	NA	1042840.089	20525.354	627176.143	104598.143	11276.779	NA	1072078.336	101739.545	3314.33	1598200.444	5204730.619	257193.216	441648.948	40211006.844	817395.681	26719279.099
QC_exp3-liver_5h	418.566	NA	NA	NA	NA	NA	NA	NA	NA	NA	NA	NA	70.712	NA	NA	NA	4512.855	NA	NA	NA	NA	NA	NA	NA	NA	NA	NA	21169.012	NA	NA	NA	NA	5131.531	NA	NA	NA	NA	NA	882.947	NA	NA	NA	NA	NA	NA	NA	NA	NA	NA
QC-exp3-liver_5a	NA	NA	55826.479	NA	NA	44765.743	NA	NA	NA	NA	NA	NA	NA	9862.046	NA	NA	NA	NA	NA	NA	NA	NA	NA	NA	NA	NA	NA	NA	5902.809	NA	NA	NA	NA	NA	NA	NA	NA	NA	NA	NA	NA	NA	NA	NA	NA	NA	NA	NA	NA
QC_exp123-liver_6bb	441.153	NA	NA	NA	NA	NA	NA	NA	NA	NA	NA	NA	1855.19	NA	NA	NA	6766.667	NA	NA	NA	NA	NA	NA	NA	NA	NA	NA	52417.66	NA	NA	NA	NA	4443.34	NA	NA	NA	NA	NA	512.287	NA	NA	NA	NA	NA	NA	NA	NA	NA	NA
QC_exp123-liver_pre.baliver2	110.236	NA	NA	NA	NA	NA	NA	NA	NA	NA	NA	NA	44.875	NA	NA	NA	4804.694	NA	NA	NA	NA	NA	NA	NA	NA	NA	NA	26314.016	NA	NA	NA	NA	3220.646	NA	NA	NA	NA	NA	438.75	NA	NA	NA	NA	NA	NA	NA	NA	NA	NA
QC-exp3-liver_5b	NA	NA	52236.392	NA	NA	45423.392	NA	NA	NA	NA	NA	NA	NA	9315.327	NA	NA	NA	NA	NA	NA	NA	NA	NA	NA	NA	NA	NA	NA	5768.46	NA	NA	NA	NA	NA	NA	NA	NA	NA	NA	NA	NA	NA	NA	NA	NA	NA	NA	NA	NA
QC-exp3-liver_5c	NA	NA	48158.49	NA	NA	45009.89	NA	NA	NA	NA	NA	NA	NA	8301.307	NA	NA	NA	NA	NA	NA	NA	NA	NA	NA	NA	NA	NA	NA	5514.297	NA	NA	NA	NA	NA	NA	NA	NA	NA	NA	NA	NA	NA	NA	NA	NA	NA	NA	NA	NA
QC_exp1-liver_5a	278.783	14041.443	NA	738256.251	19303.286	NA	10592.983	1548.948	269777.768	1017255.533	121440.088	36772844.389	509.267	NA	192294.367	192483820.993	5523.389	3817.936	31786.983	29621.71	2998247.947	41763.128	3267521.657	11633.371	3335382.347	2767373.468	489430.783	39521.149	NA	328550.151	389430.756	3799085.149	4646.558	1019190.114	18214.6	1340305.476	65879.711	10581.588	753.104	1029001.559	70142.339	2579.384	831282.432	3770681.115	233012.027	151771.764	37241583.207	553104.941	21965464.269
QC-exp3-liver_5d	NA	NA	46599.53	NA	NA	44423.03	NA	NA	NA	NA	NA	NA	NA	8172.821	NA	NA	NA	NA	NA	NA	NA	NA	NA	NA	NA	NA	NA	NA	5453.581	NA	NA	NA	NA	NA	NA	NA	NA	NA	NA	NA	NA	NA	NA	NA	NA	NA	NA	NA	NA
QC_exp1-liver_5b	264.87	17468.584	NA	754897.164	19799.593	NA	10923.623	2801.579	270873.545	1024188.591	130970.649	36897742.187	382.97	NA	206760.377	167070797.85	5268.746	3612.724	33170.896	36395.566	1748014.929	45209.949	3217773.532	7857.339	3286266.83	2971073.931	510671.241	38552.18	NA	322370.578	389798.153	3857756.322	4361.623	1038222.547	23032.517	1314383.601	85431.316	10971.743	704.699	1043970.914	70534.969	2734.562	871541.826	3943766.666	211730.446	149214.231	37902566.083	578219.1	20931165.621
QC-exp3-liver_5e	NA	NA	46656.628	NA	NA	44896.98	NA	NA	NA	NA	NA	NA	NA	8136.278	NA	NA	NA	NA	NA	NA	NA	NA	NA	NA	NA	NA	NA	NA	5447.286	NA	NA	NA	NA	NA	NA	NA	NA	NA	NA	NA	NA	NA	NA	NA	NA	NA	NA	NA	NA
QC_exp1-liver_6a	NA	17928.798	NA	824722.741	21103.671	NA	12109.638	2261.492	285258.666	1188110.725	133186.716	36232963.869	NA	NA	221987.017	192260947.09	NA	3447.36	36965.643	37825.89	2010303.389	42955.201	3656976.359	8758.578	3443572.885	3493294.836	603751.111	NA	NA	362693.503	431469.267	3752533.04	NA	1089786.149	25122.289	1467732.35	97462.897	11641.166	NA	1180969.405	73612.098	2910.267	980283.227	4201903.114	286480.067	172643.264	38257298.984	623541.537	24171164.735
QC_exp1-liver_5c	325.819	19406.5	NA	797949.872	22242.221	NA	11484.035	2451.506	276829.403	1124521.556	132092.319	38072441.869	422.541	NA	216284.274	179056699.826	5340.557	3731.657	36003.499	38273.416	1809785.866	50863.124	3422941.515	8056.172	3379578.562	3318594.994	559616.278	37955.245	NA	342505.191	397812.317	3777973.37	4156.248	1082866.325	24165.717	1268590.047	89972.686	11275.878	666.159	1147140.079	75600.81	2951.348	928483.591	4201897.405	242978.453	166106.219	37700871.906	608697.26	22980780.198
QC-exp3-liver_5f	NA	NA	46508.036	NA	NA	45036.549	NA	NA	NA	NA	NA	NA	NA	8256.51	NA	NA	NA	NA	NA	NA	NA	NA	NA	NA	NA	NA	NA	NA	5348.186	NA	NA	NA	NA	NA	NA	NA	NA	NA	NA	NA	NA	NA	NA	NA	NA	NA	NA	NA	NA
QC_exp1-liver_6b	NA	20233.492	NA	736840.494	20434.89	NA	10790.806	2399.677	275747.792	1075353.34	124804.567	33337299.255	NA	NA	186401.977	187601273.761	NA	3958.518	31994.656	34084.832	2024670.567	47997.926	3304829.254	7411.409	3210173.006	3173773.685	531017.303	NA	NA	341905.907	389339.76	3657853.982	NA	981688.329	23509.593	1273516.475	112675.254	10849.379	NA	1100908.093	69904.673	2502.107	859535.052	3705918.158	256313.001	142552.232	36436846.689	543230	21679582.68
QC_exp2-liver_5a	314.005	12540.974	NA	868379.579	27893.068	NA	12689.749	1385.684	287156.936	1240419.457	138316.425	41077633.149	15.331	NA	229851.017	209918659.281	5659.656	4180.45	39430.376	32452.136	2979575.486	53018.614	3189805.725	11475.931	3897910.331	3109153.144	489646.363	13176.52	NA	360328.251	422672.516	3693373.226	5156.047	1084827.701	21599.868	1125518.51	86736.328	10929.725	1002.587	923184.42	86061	3281.019	1351973.346	4541662.237	251965.149	298316.224	41112172.772	770537.381	25328501.702
QC_exp1-liver_5d	288.592	16830.05	NA	858827.994	22642.848	NA	12629.513	1852.017	294869.266	1222814.18	142205.074	38794418.729	407.837	NA	230522.117	181047687.482	5269.548	3626.901	38269.631	41485.153	2063004.196	47187.514	3769788.694	9160.645	3532090.009	3577371.594	632316.916	39167.294	NA	355876.921	418278.725	3859576.374	4267.335	1168992.539	26505.001	1278374.164	101371.871	12061.836	764.035	1274407.055	82392.041	3205.491	1013164.486	4568802.018	265763.898	170030.192	39123520.961	654632.564	24764192.133
QC-exp3-liver_5g	NA	NA	46604.847	NA	NA	44998.381	NA	NA	NA	NA	NA	NA	NA	7932.948	NA	NA	NA	NA	NA	NA	NA	NA	NA	NA	NA	NA	NA	NA	5416.833	NA	NA	NA	NA	NA	NA	NA	NA	NA	NA	NA	NA	NA	NA	NA	NA	NA	NA	NA	NA
QC_exp1-liver_6c	NA	17002.696	NA	765122.97	20169.9	NA	11522.67	1339.645	279514.516	1057864.376	127566.694	34011126.036	NA	NA	207123.979	182796064.224	NA	3699.506	31325.77	34503.846	2173004.032	42647.224	3169228.232	8874.145	3265072.173	3145995.746	516931.111	NA	NA	332873.089	395801.122	3726045.04	NA	1030296.013	22556.746	1211274.186	103506.52	8992.896	NA	1083514.426	73527.28	2675.248	864974.665	3902957.054	237173.076	159199.066	36640139.673	585835.463	21690556.711
QC-exp1-liver_5a	NA	NA	46988.836	NA	NA	40419.225	NA	NA	NA	NA	NA	NA	NA	9411.048	NA	NA	NA	NA	NA	NA	NA	NA	NA	NA	NA	NA	NA	NA	4870.691	NA	NA	NA	NA	NA	NA	NA	NA	NA	NA	NA	NA	NA	NA	NA	NA	NA	NA	NA	NA
QC_exp2-liver_5b	267.372	17533.282	NA	907516.345	29496.131	NA	10542.028	3573.593	285301.436	1264434.175	144256.324	40561201.361	28.545	NA	236688.276	199235942.477	5652.414	3773.816	39669.561	71644.163	2910751.198	71101.799	3167417.113	9685.848	3810002.954	3627191.907	502733.274	11913.255	NA	415819.524	414941.697	3505041.977	5638.329	1087630.875	27786.073	1088292.716	149383.95	14123.117	670.683	965106.93	98072.992	2900.136	1324929.14	4713580.008	268026.417	346103.862	40281549.786	716727.247	25617144.016
QC_exp123-liver_post.baliver2	160.292	NA	NA	NA	NA	NA	NA	NA	NA	NA	NA	NA	23.56	NA	NA	NA	4397.351	NA	NA	NA	NA	NA	NA	NA	NA	NA	NA	18568.991	NA	NA	NA	NA	3404.012	NA	NA	NA	NA	NA	617.422	NA	NA	NA	NA	NA	NA	NA	NA	NA	NA
QC_exp1-liver_5gb	NA	NA	NA	NA	NA	NA	NA	NA	NA	NA	NA	NA	NA	NA	NA	NA	NA	NA	NA	NA	NA	NA	NA	NA	NA	NA	NA	NA	NA	NA	NA	NA	NA	NA	NA	NA	NA	NA	NA	NA	NA	NA	NA	NA	NA	NA	NA	NA	NA
QC_exp1-liver_5gc	NA	NA	NA	NA	NA	NA	NA	NA	NA	NA	NA	NA	NA	NA	NA	NA	NA	NA	NA	NA	NA	NA	NA	NA	NA	NA	NA	NA	NA	NA	NA	NA	NA	NA	NA	NA	NA	NA	NA	NA	NA	NA	NA	NA	NA	NA	NA	NA	NA
QC_exp1-liver_5gd	NA	NA	NA	NA	NA	NA	NA	NA	NA	NA	NA	NA	NA	NA	NA	NA	NA	NA	NA	NA	NA	NA	NA	NA	NA	NA	NA	NA	NA	NA	NA	NA	NA	NA	NA	NA	NA	NA	NA	NA	NA	NA	NA	NA	NA	NA	NA	NA	NA
QC_exp123-liver_pre.baliver1	161.702	NA	NA	NA	NA	NA	NA	NA	NA	NA	NA	NA	116.501	NA	NA	NA	3331.48	NA	NA	NA	NA	NA	NA	NA	NA	NA	NA	15250.384	NA	NA	NA	NA	2818.315	NA	NA	NA	NA	NA	434.643	NA	NA	NA	NA	NA	NA	NA	NA	NA	NA
QC_exp2-liver_5c	168.401	15734.225	NA	898923.124	28668.433	NA	11792.776	3335.348	281447.657	1257232.509	136265.257	40552426.687	23.783	NA	228147.942	194523170.075	5350.228	3920.875	38165.417	57170.854	2819430.774	67526.584	3113685.42	9857.558	3813090.38	3579402.156	482116.798	11228.991	NA	403765.435	404821.152	3474287.935	4829.643	1116299.346	26162.096	976384.692	136271.634	11003.789	731.799	958673.512	91360.586	3058.25	1342048.324	4867657.346	263861.526	355479.824	40036725.432	719550.232	25300476.228
QC-exp1-liver_5b	NA	NA	47183.111	NA	NA	41696.86	NA	NA	NA	NA	NA	NA	NA	9897.202	NA	NA	NA	NA	NA	NA	NA	NA	NA	NA	NA	NA	NA	NA	5388.554	NA	NA	NA	NA	NA	NA	NA	NA	NA	NA	NA	NA	NA	NA	NA	NA	NA	NA	NA	NA
QC_exp1-liver_6d	NA	17326.915	NA	768102.495	20855.645	NA	12265.02	2416.906	277765.97	1055107.391	128780.144	35739986.183	NA	NA	204391.211	179407394.242	NA	3761.715	33181.281	34786.565	2269605.214	45656.535	3242252.928	10123.736	3274622.544	3072992.077	489397.742	NA	NA	343442.588	394839.655	3631651.975	NA	1008031.601	19899.356	1156401.562	82717.417	10369.722	NA	1044138.342	76236.32	2923.055	899299.892	3964252.906	234834.307	170744.67	37259568.479	584977.554	22053496.628
QC_exp1-liver_5e	236.059	17311.944	NA	816580.997	22750.531	NA	12059.675	1470.302	293531.44	1085788.755	133456.135	38902547.374	476.915	NA	221741.957	171871217.715	6043.697	3611.641	36001.724	37779.122	2573374.41	48088.836	3583404.212	11214.726	3384221.918	3314284.721	557234.794	39739.703	NA	338150.281	394290.849	3708977.599	4068.552	1085083.69	21794.269	993725.987	118556.351	12158.659	720.944	1172497.351	76929.173	2916.386	1024302.634	4452986.585	241678.7	182097.104	37009263.693	630495.676	22760294.902
QC_exp2-liver_5e	147.833	NA	NA	NA	NA	NA	NA	NA	NA	NA	NA	NA	18.123	NA	NA	NA	5749.025	NA	NA	NA	NA	NA	NA	NA	NA	NA	NA	10455.316	NA	NA	NA	NA	5376.237	NA	NA	NA	NA	NA	558.792	NA	NA	NA	NA	NA	NA	NA	NA	NA	NA
QC-exp1-liver_5c	NA	NA	47417.758	NA	NA	42681.432	NA	NA	NA	NA	NA	NA	NA	10642.229	NA	NA	NA	NA	NA	NA	NA	NA	NA	NA	NA	NA	NA	NA	5792.449	NA	NA	NA	NA	NA	NA	NA	NA	NA	NA	NA	NA	NA	NA	NA	NA	NA	NA	NA	NA
QC_exp1-liver_5f	303.814	NA	NA	NA	NA	NA	NA	NA	NA	NA	NA	NA	592.918	NA	NA	NA	5504.206	NA	NA	NA	NA	NA	NA	NA	NA	NA	NA	43014.27	NA	NA	NA	NA	4629.881	NA	NA	NA	NA	NA	830.276	NA	NA	NA	NA	NA	NA	NA	NA	NA	NA
QC_exp2-liver_5f	227.971	NA	NA	NA	NA	NA	NA	NA	NA	NA	NA	NA	14.558	NA	NA	NA	5249.604	NA	NA	NA	NA	NA	NA	NA	NA	NA	NA	10025.584	NA	NA	NA	NA	5069.363	NA	NA	NA	NA	NA	651.439	NA	NA	NA	NA	NA	NA	NA	NA	NA	NA
QC_exp2-liver_5d	167.242	12110.508	NA	884740.968	27370.977	NA	13333.405	1869.875	270167.137	1121751.489	137130.798	39517187.109	13.894	NA	214244.91	182512416.556	5310.228	4158.787	40114.782	58254.072	2221855.212	44485.522	3290128.075	6935.197	3676028.053	3776266.583	523991.877	11044.563	NA	422958.503	433753.726	3670891.015	5526.208	1037339.573	19799.618	631825.096	45217.466	11175.028	614.637	1029567.493	91679.935	3321.187	1355519.929	5060889.013	257394.738	360234.796	38714000.798	718658.676	25276243.823
QC-exp1-liver_5d	NA	NA	48369.596	NA	NA	41676.651	NA	NA	NA	NA	NA	NA	NA	9575.509	NA	NA	NA	NA	NA	NA	NA	NA	NA	NA	NA	NA	NA	NA	5096.764	NA	NA	NA	NA	NA	NA	NA	NA	NA	NA	NA	NA	NA	NA	NA	NA	NA	NA	NA	NA
QC_exp1-liver_5g	358.892	NA	NA	NA	NA	NA	NA	NA	NA	NA	NA	NA	789.217	NA	NA	NA	5781.171	NA	NA	NA	NA	NA	NA	NA	NA	NA	NA	47115.07	NA	NA	NA	NA	4274.626	NA	NA	NA	NA	NA	649.604	NA	NA	NA	NA	NA	NA	NA	NA	NA	NA
QC_exp2-liver_5g	179.733	NA	NA	NA	NA	NA	NA	NA	NA	NA	NA	NA	6.892	NA	NA	NA	4750.789	NA	NA	NA	NA	NA	NA	NA	NA	NA	NA	9390.372	NA	NA	NA	NA	5191.312	NA	NA	NA	NA	NA	714.756	NA	NA	NA	NA	NA	NA	NA	NA	NA	NA
QC-exp1-liver_5e	NA	NA	48145.557	NA	NA	41862.479	NA	NA	NA	NA	NA	NA	NA	9823.487	NA	NA	NA	NA	NA	NA	NA	NA	NA	NA	NA	NA	NA	NA	5283.756	NA	NA	NA	NA	NA	NA	NA	NA	NA	NA	NA	NA	NA	NA	NA	NA	NA	NA	NA	NA
QC_exp2-liver_6a	NA	13868.337	NA	924460.093	30004.355	NA	13234.382	2154.353	294818.861	1263318.847	149892.343	40259408.43	NA	NA	238176.64	191383110.758	NA	3870.461	41949.116	47695.374	2516142.486	59214.738	3309699.985	8939.972	3878001.834	3616587.425	537003.999	NA	NA	388485.766	455447.292	3630278.596	NA	1011486.236	22781.817	982106.454	108739.681	13346.021	NA	1021167.062	94458.545	2940.305	1405888.932	4752169.893	263055.453	346024.086	40348422.069	777436.883	26671547.297
QC_exp1-liver_5h	283.307	NA	NA	NA	NA	NA	NA	NA	NA	NA	NA	NA	1124.089	NA	NA	NA	6181.416	NA	NA	NA	NA	NA	NA	NA	NA	NA	NA	54180.143	NA	NA	NA	NA	5247.759	NA	NA	NA	NA	NA	622.739	NA	NA	NA	NA	NA	NA	NA	NA	NA	NA
QC_exp2-liver_6b	NA	13516.014	NA	902706.582	30486.388	NA	14743.933	1263.539	299466.452	1196293.866	143644.712	40426846.81	NA	NA	242743.059	198718351.515	NA	4451.85	41737.293	52679.615	2624750.879	49082.428	3340081.121	8894.329	3936513.621	3537606.969	585557.861	NA	NA	416668.578	463871.28	3737576.851	NA	1128615.793	22024.782	890076.257	70026.2	12157.024	NA	1136437.335	93947.642	3702.619	1455811.095	4885374.484	261215.618	336996.08	40279206.749	783793.864	25244771.682
QC-exp1-liver_5f	NA	NA	47040.495	NA	NA	42299.338	NA	NA	NA	NA	NA	NA	NA	10267.875	NA	NA	NA	NA	NA	NA	NA	NA	NA	NA	NA	NA	NA	NA	5317.272	NA	NA	NA	NA	NA	NA	NA	NA	NA	NA	NA	NA	NA	NA	NA	NA	NA	NA	NA	NA
QC_exp2-liver_6c	NA	12276.856	NA	929361.824	30688.41	NA	15848.203	2515.929	298292.468	1212809.92	143017.395	40511186.2	NA	NA	246740.975	179249322.014	NA	4209.684	43024.135	54771.208	2592446.146	50275.101	3433456.173	9136.018	4036695.822	3711037.887	665145.661	NA	NA	459388.284	501712.993	3687771.584	NA	1072522.988	20045.469	748487.449	106122.382	12246.668	NA	1336469.085	93087.231	3627.567	1515124.595	4988654.171	257818.906	355126.347	40205896.803	813956.183	25683482.74
QC-exp1-liver_5g	NA	NA	46952.166	NA	NA	41792.209	NA	NA	NA	NA	NA	NA	NA	10501.629	NA	NA	NA	NA	NA	NA	NA	NA	NA	NA	NA	NA	NA	NA	5639.139	NA	NA	NA	NA	NA	NA	NA	NA	NA	NA	NA	NA	NA	NA	NA	NA	NA	NA	NA	NA
QC-exp1-liver_5h	NA	NA	47935.858	NA	NA	42458.054	NA	NA	NA	NA	NA	NA	NA	10920.766	NA	NA	NA	NA	NA	NA	NA	NA	NA	NA	NA	NA	NA	NA	5360.709	NA	NA	NA	NA	NA	NA	NA	NA	NA	NA	NA	NA	NA	NA	NA	NA	NA	NA	NA	NA
QC-exp1-liver_4f	NA	NA	46029.117	NA	NA	40761.056	NA	NA	NA	NA	NA	NA	NA	8263.19	NA	NA	NA	NA	NA	NA	NA	NA	NA	NA	NA	NA	NA	NA	5532.752	NA	NA	NA	NA	NA	NA	NA	NA	NA	NA	NA	NA	NA	NA	NA	NA	NA	NA	NA	NA
QC_exp2-liver_6d	NA	15984.773	NA	918530.758	30217.974	NA	17331.043	2145.237	317094.066	1241851.158	152905.166	40943438.789	NA	NA	251466.825	174853021.421	NA	4270.872	42764.061	50882.696	2259849.322	48635.558	3593068.256	6728.783	4087603.308	3896190.812	799345.9	NA	NA	453657.526	492032.846	3727256.855	NA	1104319.64	18218.666	625227.458	117247.37	10851.516	NA	1545212.039	94653.348	3689.555	1509582.967	5326321.337	265907.975	441443.6	39639482.137	815840.806	27554054.532
QC_exp123-liver_post.baliver1	220.569	NA	NA	NA	NA	NA	NA	NA	NA	NA	NA	NA	33.429	NA	NA	NA	3790.41	NA	NA	NA	NA	NA	NA	NA	NA	NA	NA	20073.086	NA	NA	NA	NA	2951.294	NA	NA	NA	NA	NA	570.678	NA	NA	NA	NA	NA	NA	NA	NA	NA	NA
Nacl-j3-exp3-liver_3	387.427	9711.21	43929.933	653812.2	23502.726	59616.815	12387.997	1231.21	192761.887	483663.226	115445.987	34430716.203	172.065	7008.591	157756.004	172394076.816	15045.91	4102.045	41333.149	41201.187	2757747.451	66025.831	1840094.349	8202.045	3829223.268	3790436.692	555067.33	34372.085	7301.283	403820.727	411133.405	3295687.135	18444.115	374245.355	13355.278	652603.957	52981.055	10345.903	718.408	1102960.989	97142.964	1894.725	3164406.429	4361549.317	195405.422	964414.305	41737001.663	784805.976	15633753.311
FECES-j3-exp3-liver_16	162.629	8808.814	54893.183	742276.894	19401.1	77791.477	12433.43	1879.392	334539.443	810229.548	101730.478	31686499.004	32.656	7505.62	193725.76	148005780.048	931.75	4445.889	37203.626	61261.619	2356341.514	54097.907	1812429.47	7807.382	4392098.765	3139911.569	546692.631	19747.617	4586.626	479092.418	398018.966	3543445.925	1489.049	822364.679	11360.26	497373.359	53790.955	12730.988	187.258	1092387.775	115407.182	4198.876	1538449.873	2482511.111	275670.043	606187.862	43122987.671	548302.798	16260449.362
ATB-j7-exp3-liver_33	72.417	12675.995	55020.221	631379.054	40192.746	105128.427	10648.197	1991.82	272121.648	1015796.276	159575.843	41517005.688	159.058	7695.893	228406.055	148405725.689	315.951	4934.553	38404.788	54088.975	2788099.904	57201.949	3213036.663	7545.294	3570328.09	2724826.356	560112.199	7165.46	3724.356	435589.562	425056.388	3701967.855	1537.624	1810028.553	13830.075	684266.416	93582.774	10294.048	316.131	1121920.682	82310.759	3614.098	1217587.215	5399408.501	195535.541	253313.768	39400483.789	836287.054	30087301.112
AKKERMANSIA-j14-exp3-liver_63	422.066	14995.941	56220.011	1302002.223	21762.896	21135.515	12361.596	2243.822	336750.598	1543882.2	130516.876	36517833.008	126.668	3958.241	342725.091	258271052.099	6305.112	5224.303	38543.843	43136.529	1843991.123	51594.778	3108103.595	6414.539	3325039.926	4443585.765	677231.405	3195.061	2310.428	416084.19	448082.549	3715615.192	2336.563	1180338.07	20373.041	645202.699	189829.866	15538.404	414.081	1373118.416	69541.998	3719.119	634643.495	3267940.188	366239.49	126144.33	40911464.252	720115.267	24631357.832
Nacl-j7-exp3-liver_27	140.274	12666.193	39894.526	762823.335	18002.9	25625.922	8829.478	3049.019	287449.078	1577756.166	92113.572	32906041.985	65.854	7276.166	299909.107	229071078.59	4152.987	4893.016	58071.109	38328.19	2159721.073	49389.932	2323987.823	11657.399	4613735.775	3384802.76	625595.869	4695.209	4147.356	365397.507	317630.831	3480827.899	2311.293	850603.73	16493.304	577433.851	149241.554	11186.778	393.903	1224908.297	91100.22	2095.161	1210704.131	2682478.074	199033.307	294248.1	40860627.919	279291.91	12827093.59
ATB-j3-exp3-liver_9	1348.865	11240.019	55120.258	653477.075	33929.053	29714.567	12714.118	1350.27	251828.385	1086974.724	146328.553	45856113.213	193.331	6317.276	149340.659	144595109.174	2710.402	4162.5	65477.465	61428.63	2367244.544	67412.911	2676074.036	7435.39	3794025.178	3178947.649	713202.909	38042.426	3679.763	438957.198	426003.697	3283288.872	21045.401	694089.82	14406.638	821798.952	52727.778	9558.574	416.412	1447582.191	99555.185	4500.447	1563198.347	4063333.628	213143.018	596103.216	41868235.645	915974.508	28306619.273
[truncated: 238 more rows]
[truncated: 94 more columns]

## Sheet: AreaCorrLog2Cen
Sid	12-dehydrocholic acid@5.28-ba	2-aminoadipic acid@15.22-gc	2-hydroxybutyric acid@2.50-sf	2-hydroxyglutaric acid@12.99-gc	2-oxoglutaric acid@13.00-gc	3-hydroxybutyric acid@1.66-sf	3-hydroxyisovaleric acid@7.82-gc	3-methylhistidine@16.86-gc	4-hydroxymandelic acid@15.21-gc	4-hydroxyproline@12.43-gc	5-aminovaleric acid@13.51-gc	5-oxoproline@12.34-gc	7,12-dihydroxy-3-oxocholanoic acid@7.06-ba	Acetic acid@1.80-sf	Adenine@16.17-gc	Alanine@6.92-gc	Alpha-muricholic acid@5.88-ba	Alpha-tocopherol@29.51-gc	Arabinose@14.16-gc	Arabitol@14.80-gc	Arachidonic acid@23.72-gc	Asparagine@14.11-gc	Aspartic acid@12.36-gc	Behenic acid@26.39-gc	Benzoic acid@8.76-gc	Beta-alanine@11.15-gc	Beta-hydroxypyruvic acid@5.43-gc	Beta-muricholic acid@6.15-ba	Butanoic acid@5.31-sf	Capric acid@11.44-gc	Caprylic acid@8.95-gc	Cholesterol@29.51-gc	Cholic acid@9.07-ba	Citric acid;Isocitric acid@15.79-gc	Citrulline@15.76-gc	Creatine@12.79-gc	Cystine;Cysteine@22.97-gc	Cytosine@12.37-gc	Deoxycholic acid@10.46-ba	Dimethylglycine@5.43-gc	Erythritol@12.29-gc	Ferulic acid@19.16-gc	Fructose@16.47-gc	Fumaric acid@10.07-gc	GABA@12.43-gc	Galactitol;Sorbitol;Mannitol@17.27-gc	Galactose;Glucose;Mannose@17.00-gc	Glucose-6-phosphate;Fructose-6-phosphate@23.79-gc	Glutamic acid@13.51-gc
[truncated: 330 more rows]
[truncated: 94 more columns]

[truncated: 3 more sheets: RatioInfos, Ratio, RatioLog2Cen]
