# Supplementary material for: Oral administration of Akkermansia muciniphila elevates systemic antiaging and anticancer metabolites
Source: Aging (Albany NY). 2021 Mar 2;13(5):6375–405. doi: 10.18632/aging.202739 (PMC7993698; doi:10.18632/aging.202739)
Supplement: Supplementary Table 4 [file aging-13-202739-s005.xlsx]

## Sheet: SampleInfos
Supplementary Table 4. Related to Figure 2 and Supplementary Figure 5. Targeted metabolomics analysis from PLASMA samples from mice receiving oral gavages with several commensals or PBS (control), or continuous ATB, at days 3, 7 and 14 after the first oral gavage.
Sid	sType	InjOrder	Grp	Color
BlM-exp2-plasma_pre	Bl	5	-	-
BlM_exp1-plasma_pre	Bl	12	-	-
BlM-exp2-plasma_post	Bl	58	-	-
BlM-exp1-plasma_pre	Bl	66	-	-
BlM_exp3-plasma_pre	Bl	154	-	-
BlM_exp1-plasma_post	Bl	158	-	-
BlM_exp2-plasma_pre	Bl	167	-	-
BlM-exp1-plasma_post	Bl	256	-	-
BlM-exp3-plasma_pre	Bl	267	-	-
BlM_exp3-plasma_post	Bl	303	-	-
BlM_exp2-plasma_post	Bl	309	-	-
BlM-exp3-plasma_post	Bl	332	-	-
QC-exp2-plasma_5a	QC	7	QC	#737373
QC_exp123-plasma_pre.baplasma1	QC	8	QC	#737373
QC-exp2-plasma_5b	QC	9	QC	#737373
QC_exp1-plasma_5b	QC	10	QC	#737373
QC-exp2-plasma_5c	QC	11	QC	#737373
QC_exp1-plasma_5c	QC	13	QC	#737373
QC_exp1-plasma_5a	QC	14	QC	#737373
QC-exp2-plasma_5d	QC	15	QC	#737373
QC_exp3-plasma_5d	QC	16	QC	#737373
QC_exp1-plasma_5d	QC	17	QC	#737373
QC-exp2-plasma_5e	QC	18	QC	#737373
QC_exp1-plasma_6a	QC	22	QC	#737373
QC-exp2-plasma_5f	QC	26	QC	#737373
QC_exp3-plasma_5f	QC	32	QC	#737373
QC_exp1-plasma_5f	QC	35	QC	#737373
QC_exp1-plasma_6b	QC	42	QC	#737373
QC-exp2-plasma_4f	QC	51	QC	#737373
QC_exp1-plasma_5e	QC	52	QC	#737373
QC-exp2-plasma_5g	QC	54	QC	#737373
QC_exp3-plasma_5g	QC	59	QC	#737373
QC_exp1-plasma_5g	QC	60	QC	#737373
QC-exp1-plasma_7a	QC	69	QC	#737373
QC_exp1-plasma_6c	QC	70	QC	#737373
QC_exp3-plasma_5a	QC	86	QC	#737373
QC_exp1-plasma_5i	QC	87	QC	#737373
QC_exp123-plasma_post.baplasma1	QC	88	QC	#737373
QC-exp1-plasma_7b	QC	90	QC	#737373
QC_batch-exp1-plasma_PA_5b	QC	92	QC	#737373
QC_exp1-plasma_6d	QC	94	QC	#737373
QC_exp123-plasma_pre.baplasma2	QC	106	QC	#737373
QC_exp2-plasma_5a	QC	111	QC	#737373
QC_exp3-plasma_5b	QC	117	QC	#737373
QC-exp1-plasma_7c	QC	124	QC	#737373
QC_batch-exp1-plasma_PA_5c	QC	125	QC	#737373
QC_exp2-plasma_5b	QC	139	QC	#737373
QC_exp3-plasma_5c	QC	143	QC	#737373
QC-exp1-plsma_7d	QC	152	QC	#737373
QC_batch-exp1-plasma_PA_5d	QC	157	QC	#737373
QC_exp2-plasma_5c	QC	164	QC	#737373
QC-exp1-plasma_7e	QC	178	QC	#737373
QC_batch-exp1-plasma_PA_5e	QC	180	QC	#737373
QC_exp2-plasma_6a	QC	181	QC	#737373
QC_exp2-plasma_5e	QC	202	QC	#737373
QC_exp2-plasma_6b	QC	203	QC	#737373
QC-exp1-plasma_7f	QC	206	QC	#737373
QC_batch-exp1-plasma_PA_5f	QC	208	QC	#737373
QC_exp3-plasma_5e	QC	218	QC	#737373
QC_exp2-plasma_5d	QC	222	QC	#737373
QC-exp1-plasma_7g	QC	231	QC	#737373
QC_exp2-plasma_5f	QC	232	QC	#737373
QC_exp2-plasma_6c	QC	233	QC	#737373
QC_batch-exp1-plasma_PA_5g	QC	235	QC	#737373
QC-exp1-plasma_7h	QC	254	QC	#737373
QC_exp1-plasma_5h	QC	257	QC	#737373
QC_exp2-plasma_5g	QC	260	QC	#737373
QC_exp2-plasma_6d	QC	261	QC	#737373
QC_exp123-plasma_post.baplasma2	QC	265	QC	#737373
QC-exp3-plasma_5a	QC	270	QC	#737373
QC_batch-exp2-plasma_5a	QC	274	QC	#737373
QC_batch-exp123-plasma_pre	QC	283	QC	#737373
QC_batch-exp3-plasma_5a	QC	286	QC	#737373
QC-exp3-plasma_5b	QC	291	QC	#737373
QC_batch-exp2-plasma_5b	QC	294	QC	#737373
QC_batch-exp3-plasma_5b	QC	299	QC	#737373
QC-exp3-plasma_5c	QC	307	QC	#737373
QC_batch-exp2-plasma_5c	QC	310	QC	#737373
QC_batch-exp3-plasma_5c	QC	316	QC	#737373
QC_batch-exp2-plasma_5d	QC	319	QC	#737373
QC-exp3-plasma_5d	QC	320	QC	#737373
QC_exp3-plasma_6a	QC	321	QC	#737373
QC_batch-exp3-plasma_5d	QC	322	QC	#737373
QC_batch-exp2-plasma_5e	QC	323	QC	#737373
QC-exp3-plasma_5e	QC	324	QC	#737373
QC_exp3-plasma_6b	QC	325	QC	#737373
QC_batch-exp3-plasma_5e	QC	326	QC	#737373
QC_batch-exp2-plasma_5f	QC	327	QC	#737373
QC-exp3-plasma_5f	QC	328	QC	#737373
QC_exp3-plasma_6c	QC	329	QC	#737373
QC_batch-exp3-plasma_5f	QC	330	QC	#737373
QC-exp3-plasma_5g	QC	331	QC	#737373
QC_batch-exp2-plasma_5g	QC	333	QC	#737373
QC_exp3-plasma_6d	QC	336	QC	#737373
QC_batch-exp3-plasma_5g	QC	337	QC	#737373
QC_batch-exp123-plasma_post	QC	339	QC	#737373
HIRAE-j14-exp1-plasma_239	Sa	19	HIRAE j14 exp1 plasma	#54278F
BARNECIELA-j14-exp1-plasma_252	Sa	20	BARNECIELA j14 exp1 plasma	#08519C
ATB-j7-exp1-plasma_207	Sa	21	ATB j7 exp1 plasma	#EF3B2C
HIRAE-j14-exp1-plasma_235	Sa	23	HIRAE j14 exp1 plasma	#54278F
BARNECIELA-j3-exp1-plasma_195	Sa	24	BARNECIELA j3 exp1 plasma	#6BAED6
ATB-j3-exp1-plasma_179	Sa	25	ATB j3 exp1 plasma	#FB6A4A
BARNECIELA-j14-exp1-plasma_247	Sa	27	BARNECIELA j14 exp1 plasma	#08519C
Nacl-j7-exp1-plasma_199	Sa	28	Nacl j7 exp1 plasma	#006D2C
HIRAE-j3-exp1-plasma_185	Sa	29	HIRAE j3 exp1 plasma	#9E9AC8
ATB-j14-exp1-plasma_230	Sa	30	ATB j14 exp1 plasma	#A50F15
FRAGILIS-j3-exp1-plasma_189	Sa	31	FRAGILIS j3 exp1 plasma	#8C510A
ATB-j14-exp1-plasma_232	Sa	33	ATB j14 exp1 plasma	#A50F15
ATB-j3-exp1-plasma_175	Sa	34	ATB j3 exp1 plasma	#FB6A4A
HIRAE-j7-exp1-plasma_213	Sa	36	HIRAE j7 exp1 plasma	#7960AB
Nacl-j7-exp1-plasma_203	Sa	37	Nacl j7 exp1 plasma	#006D2C
Nacl-j3-exp1-plasma_169	Sa	38	Nacl j3 exp1 plasma	#41AB5D
FRAGILIS-j7-exp1-plasma_221	Sa	39	FRAGILIS j7 exp1 plasma	#B58943
ATB-j7-exp1-plasma_209	Sa	40	ATB j7 exp1 plasma	#EF3B2C
BARNECIELA-j3-exp1-plasma_193	Sa	41	BARNECIELA j3 exp1 plasma	#6BAED6
FRAGILIS-j7-exp1-plasma_217	Sa	43	FRAGILIS j7 exp1 plasma	#B58943
ATB-j3-exp1-plasma_177	Sa	44	ATB j3 exp1 plasma	#FB6A4A
FRAGILIS-j3-exp1-plasma_190	Sa	45	FRAGILIS j3 exp1 plasma	#8C510A
FRAGILIS-j14-exp1-plasma_241	Sa	46	FRAGILIS j14 exp1 plasma	#DFC27D
Nacl-j3-exp1-plasma_171	Sa	47	Nacl j3 exp1 plasma	#41AB5D
BARNECIELA-j7-exp1-plasma_225	Sa	48	BARNECIELA j7 exp1 plasma	#397FB9
HIRAE-j3-exp1-plasma_183	Sa	49	HIRAE j3 exp1 plasma	#9E9AC8
ATB-j14-exp1-plasma_233	Sa	50	ATB j14 exp1 plasma	#A50F15
HIRAE-j7-exp1-plasma_211	Sa	53	HIRAE j7 exp1 plasma	#7960AB
FRAGILIS-j14-exp1-plasma_246	Sa	55	FRAGILIS j14 exp1 plasma	#DFC27D
FRAGILIS-j14-exp1-plasma_243	Sa	56	FRAGILIS j14 exp1 plasma	#DFC27D
ATB-j7-exp1-plasma_205	Sa	57	ATB j7 exp1 plasma	#EF3B2C
Nacl-j7-exp1-plasma_201	Sa	62	Nacl j7 exp1 plasma	#006D2C
FRAGILIS-j3-exp1-plasma_191	Sa	63	FRAGILIS j3 exp1 plasma	#8C510A
HIRAE-j7-exp1-plasma_215	Sa	68	HIRAE j7 exp1 plasma	#7960AB
BARNECIELA-j7-exp1-plasma_223	Sa	71	BARNECIELA j7 exp1 plasma	#397FB9
Nacl-j7-exp1-plasma_202	Sa	72	Nacl j7 exp1 plasma	#006D2C
FRAGILIS-j14-exp1-plasma_244	Sa	73	FRAGILIS j14 exp1 plasma	#DFC27D
Nacl-j3-exp1-plasma_172	Sa	74	Nacl j3 exp1 plasma	#41AB5D
Nacl-j3-exp1-plasma_173	Sa	75	Nacl j3 exp1 plasma	#41AB5D
HIRAE-j14-exp1-plasma_240	Sa	76	HIRAE j14 exp1 plasma	#54278F
HIRAE-j3-exp1-plasma_184	Sa	77	HIRAE j3 exp1 plasma	#9E9AC8
FRAGILIS-j7-exp1-plasma_222	Sa	78	FRAGILIS j7 exp1 plasma	#B58943
Nacl-j3-exp1-plasma_170	Sa	79	Nacl j3 exp1 plasma	#41AB5D
BARNECIELA-j7-exp1-plasma_226	Sa	80	BARNECIELA j7 exp1 plasma	#397FB9
FRAGILIS-j3-exp1-plasma_187	Sa	81	FRAGILIS j3 exp1 plasma	#8C510A
BARNECIELA-j14-exp1-plasma_248	Sa	82	BARNECIELA j14 exp1 plasma	#08519C
BARNECIELA-j3-exp1-plasma_196	Sa	83	BARNECIELA j3 exp1 plasma	#6BAED6
ATB-j7-exp1-plasma_206	Sa	84	ATB j7 exp1 plasma	#EF3B2C
BARNECIELA-j3-exp1-plasma_197	Sa	85	BARNECIELA j3 exp1 plasma	#6BAED6
ATB-j14-exp1-plasma_231	Sa	89	ATB j14 exp1 plasma	#A50F15
HIRAE-j3-exp1-plasma_182	Sa	91	HIRAE j3 exp1 plasma	#9E9AC8
BARNECIELA-j7-exp1-plasma_227	Sa	96	BARNECIELA j7 exp1 plasma	#397FB9
Nacl-j3-exp2-plasma_134	Sa	97	Nacl j3 exp2 plasma	#41AB5D
ATB-j3-exp2-plasma_142	Sa	99	ATB j3 exp2 plasma	#FB6A4A
MITSUAKI-j3-exp2-plasma_154	Sa	102	MITSUAKI j3 exp2 plasma	#FD8D3C
ATB-j3-exp1-plasma_178	Sa	104	ATB j3 exp1 plasma	#FB6A4A
ATB-j7-exp2-plasma_166	Sa	105	ATB j7 exp2 plasma	#EF3B2C
BARNECIELA-j14-exp1-plasma_251	Sa	107	BARNECIELA j14 exp1 plasma	#08519C
HIRAE-j14-exp1-plasma_236	Sa	108	HIRAE j14 exp1 plasma	#54278F
ATB-j7-exp1-plasma_208	Sa	109	ATB j7 exp1 plasma	#EF3B2C
MITSUAKI-j7-exp2-plasma_178	Sa	110	MITSUAKI j7 exp2 plasma	#D1611F
BURKO-j3-exp2-plasma_148	Sa	112	BURKO j3 exp2 plasma	#80CDC1
FRAGILIS-j14-exp1-plasma_245	Sa	113	FRAGILIS j14 exp1 plasma	#DFC27D
ATB-j14-exp1-plasma_229	Sa	114	ATB j14 exp1 plasma	#A50F15
ATB-j14-exp1-plasma_234	Sa	115	ATB j14 exp1 plasma	#A50F15
ATB-j14-exp2-plasma_185	Sa	116	ATB j14 exp2 plasma	#A50F15
HIRAE-j7-exp1-plasma_214	Sa	118	HIRAE j7 exp1 plasma	#7960AB
Nacl-j7-exp2-plasma_161	Sa	119	Nacl j7 exp2 plasma	#006D2C
FRAGILIS-j7-exp1-plasma_219	Sa	120	FRAGILIS j7 exp1 plasma	#B58943
HIRAE-j14-exp1-plasma_237	Sa	121	HIRAE j14 exp1 plasma	#54278F
MITSUAKI-j14-exp2-plasma_197	Sa	122	MITSUAKI j14 exp2 plasma	#A63603
BURKO-j7-exp2-plasma_172	Sa	123	BURKO j7 exp2 plasma	#40998F
FRAGILIS-j7-exp1-plasma_218	Sa	126	FRAGILIS j7 exp1 plasma	#B58943
ATB-j3-exp1-plasma_176	Sa	127	ATB j3 exp1 plasma	#FB6A4A
BARNECIELA-j7-exp1-plasma_228	Sa	128	BARNECIELA j7 exp1 plasma	#397FB9
BURKO-j3-exp2-plasma_147	Sa	129	BURKO j3 exp2 plasma	#80CDC1
Nacl-j3-exp2-plasma_137	Sa	130	Nacl j3 exp2 plasma	#41AB5D
ATB-j3-exp2-plasma_141	Sa	131	ATB j3 exp2 plasma	#FB6A4A
HIRAE-j7-exp1-plasma_212	Sa	132	HIRAE j7 exp1 plasma	#7960AB
BARNECIELA-j7-exp1-plasma_224	Sa	133	BARNECIELA j7 exp1 plasma	#397FB9
Nacl-j7-exp1-plasma_200	Sa	134	Nacl j7 exp1 plasma	#006D2C
MITSUAKI-j3-exp2-plasma_153	Sa	135	MITSUAKI j3 exp2 plasma	#FD8D3C
FRAGILIS-j3-exp1-plasma_188	Sa	136	FRAGILIS j3 exp1 plasma	#8C510A
HIRAE-j3-exp1-plasma_181	Sa	137	HIRAE j3 exp1 plasma	#9E9AC8
BURKO-j7-exp2-plasma_171	Sa	138	BURKO j7 exp2 plasma	#40998F
ATB-j7-exp2-plasma_165	Sa	140	ATB j7 exp2 plasma	#EF3B2C
BARNECIELA-j3-exp1-plasma_194	Sa	141	BARNECIELA j3 exp1 plasma	#6BAED6
MITSUAKI-j14-exp2-plasma_196	Sa	142	MITSUAKI j14 exp2 plasma	#A63603
BURKO-j14-exp2-plasma_190	Sa	144	BURKO j14 exp2 plasma	#01665E
FRAGILIS-j14-exp1-plasma_242	Sa	145	FRAGILIS j14 exp1 plasma	#DFC27D
Nacl-j7-exp1-plasma_204	Sa	146	Nacl j7 exp1 plasma	#006D2C
ATB-j14-exp2-plasma_184	Sa	147	ATB j14 exp2 plasma	#A50F15
BARNECIELA-j14-exp1-plasma_249	Sa	148	BARNECIELA j14 exp1 plasma	#08519C
Nacl-j7-exp2-plasma_159	Sa	149	Nacl j7 exp2 plasma	#006D2C
FRAGILIS-j3-exp1-plasma_192	Sa	150	FRAGILIS j3 exp1 plasma	#8C510A
ATB-j3-exp2-plasma_140	Sa	151	ATB j3 exp2 plasma	#FB6A4A
BURKO-j14-exp2-plasma_191	Sa	153	BURKO j14 exp2 plasma	#01665E
BURKO-j14-exp2-plasma_189	Sa	155	BURKO j14 exp2 plasma	#01665E
HIRAE-j3-exp1-plasma_186	Sa	156	HIRAE j3 exp1 plasma	#9E9AC8
Nacl-j3-exp2-plasma_135	Sa	159	Nacl j3 exp2 plasma	#41AB5D
HIRAE-j7-exp1-plasma_216	Sa	160	HIRAE j7 exp1 plasma	#7960AB
MITSUAKI-j3-exp2-plasma_156	Sa	161	MITSUAKI j3 exp2 plasma	#FD8D3C
Nacl-j3-exp1-plasma_174	Sa	162	Nacl j3 exp1 plasma	#41AB5D
ATB-j3-exp2-plasma_144	Sa	163	ATB j3 exp2 plasma	#FB6A4A
BURKO-j3-exp2-plasma_150	Sa	165	BURKO j3 exp2 plasma	#80CDC1
BARNECIELA-j14-exp1-plasma_250	Sa	166	BARNECIELA j14 exp1 plasma	#08519C
MITSUAKI-j7-exp2-plasma_177	Sa	168	MITSUAKI j7 exp2 plasma	#D1611F
ATB-j3-exp1-plasma_180	Sa	169	ATB j3 exp1 plasma	#FB6A4A
HIRAE-j14-exp1-plasma_238	Sa	170	HIRAE j14 exp1 plasma	#54278F
Nacl-j7-exp2-plasma_160	Sa	171	Nacl j7 exp2 plasma	#006D2C
FRAGILIS-j7-exp1-plasma_220	Sa	172	FRAGILIS j7 exp1 plasma	#B58943
MITSUAKI-j7-exp2-plasma_179	Sa	173	MITSUAKI j7 exp2 plasma	#D1611F
MITSUAKI-j14-exp2-plasma_195	Sa	174	MITSUAKI j14 exp2 plasma	#A63603
ATB-j7-exp2-plasma_164	Sa	175	ATB j7 exp2 plasma	#EF3B2C
BURKO-j7-exp2-plasma_170	Sa	176	BURKO j7 exp2 plasma	#40998F
Nacl-j7-exp2-plasma_158	Sa	177	Nacl j7 exp2 plasma	#006D2C
ATB-j7-exp2-plasma_167	Sa	179	ATB j7 exp2 plasma	#EF3B2C
BARNECIELA-j3-exp1-plasma_198	Sa	182	BARNECIELA j3 exp1 plasma	#6BAED6
BURKO-j3-exp2-plasma_146	Sa	183	BURKO j3 exp2 plasma	#80CDC1
Nacl-j3-exp2-plasma_136	Sa	184	Nacl j3 exp2 plasma	#41AB5D
Nacl-j3-exp3-plasma_135	Sa	185	Nacl j3 exp3 plasma	#41AB5D
MITSUAKI-j3-exp2-plasma_152	Sa	186	MITSUAKI j3 exp2 plasma	#FD8D3C
FECES-j3-exp3-plasma_148	Sa	187	FECES j3 exp3 plasma	#DF65B0
BURKO-j7-exp2-plasma_174	Sa	188	BURKO j7 exp2 plasma	#40998F
ATB-j7-exp3-plasma_165	Sa	189	ATB j7 exp3 plasma	#EF3B2C
ATB-j14-exp2-plasma_182	Sa	190	ATB j14 exp2 plasma	#A50F15
AKKERMANSIA-j14-exp3-plasma_195	Sa	191	AKKER j14 exp3 plasma	#4D9221
Nacl-j7-exp3-plasma_159	Sa	192	Nacl j7 exp3 plasma	#006D2C
MITSUAKI-j7-exp2-plasma_176	Sa	193	MITSUAKI j7 exp2 plasma	#D1611F
ATB-j3-exp3-plasma_141	Sa	194	ATB j3 exp3 plasma	#FB6A4A
ATB-j14-exp2-plasma_183	Sa	195	ATB j14 exp2 plasma	#A50F15
FECES-j7-exp3-plasma_172	Sa	196	FECES j7 exp3 plasma	#BB3279
BURKO-j14-exp2-plasma_188	Sa	197	BURKO j14 exp2 plasma	#01665E
AKKERMANSIA-j3-exp3-plasma_154	Sa	198	AKKER j3 exp3 plasma	#B8E186
MITSUAKI-j14-exp2-plasma_194	Sa	199	MITSUAKI j14 exp2 plasma	#A63603
ATB-j14-exp3-plasma_182	Sa	200	ATB j14 exp3 plasma	#A50F15
ATB-j3-exp2-plasma_143	Sa	201	ATB j3 exp2 plasma	#FB6A4A
FECES-j14-exp3-plasma_191	Sa	204	FECES j14 exp3 plasma	#980043
BURKO-j7-exp2-plasma_169	Sa	205	BURKO j7 exp2 plasma	#40998F
ATB-j7-exp2-plasma_168	Sa	207	ATB j7 exp2 plasma	#EF3B2C
Nacl-j3-exp3-plasma_137	Sa	209	Nacl j3 exp3 plasma	#41AB5D
Nacl-j7-exp2-plasma_157	Sa	210	Nacl j7 exp2 plasma	#006D2C
AKKERMANSIA-j7-exp3-plasma_175	Sa	211	AKKER j7 exp3 plasma	#7FBC41
BURKO-j3-exp2-plasma_145	Sa	212	BURKO j3 exp2 plasma	#80CDC1
FECES-j7-exp3-plasma_169	Sa	213	FECES j7 exp3 plasma	#BB3279
Nacl-j3-exp2-plasma_133	Sa	214	Nacl j3 exp2 plasma	#41AB5D
ATB-j3-exp3-plasma_140	Sa	215	ATB j3 exp3 plasma	#FB6A4A
MITSUAKI-j3-exp2-plasma_151	Sa	216	MITSUAKI j3 exp2 plasma	#FD8D3C
AKKERMANSIA-j14-exp3-plasma_197	Sa	217	AKKER j14 exp3 plasma	#4D9221
Nacl-j7-exp3-plasma_158	Sa	219	Nacl j7 exp3 plasma	#006D2C
ATB-j7-exp2-plasma_163	Sa	220	ATB j7 exp2 plasma	#EF3B2C
FECES-j3-exp3-plasma_146	Sa	221	FECES j3 exp3 plasma	#DF65B0
BURKO-j14-exp2-plasma_187	Sa	223	BURKO j14 exp2 plasma	#01665E
AKKERMANSIA-j3-exp3-plasma_152	Sa	224	AKKER j3 exp3 plasma	#B8E186
Nacl-j3-exp2-plasma_138	Sa	225	Nacl j3 exp2 plasma	#41AB5D
ATB-j7-exp3-plasma_164	Sa	226	ATB j7 exp3 plasma	#EF3B2C
ATB-j14-exp2-plasma_186	Sa	227	ATB j14 exp2 plasma	#A50F15
Nacl-j3-exp3-plasma_136	Sa	228	Nacl j3 exp3 plasma	#41AB5D
MITSUAKI-j14-exp2-plasma_193	Sa	229	MITSUAKI j14 exp2 plasma	#A63603
AKKERMANSIA-j14-exp3-plasma_193	Sa	230	AKKER j14 exp3 plasma	#4D9221
MITSUAKI-j3-exp2-plasma_155	Sa	234	MITSUAKI j3 exp2 plasma	#FD8D3C
BURKO-j14-exp2-plasma_192	Sa	236	BURKO j14 exp2 plasma	#01665E
ATB-j3-exp3-plasma_143	Sa	237	ATB j3 exp3 plasma	#FB6A4A
MITSUAKI-j7-exp2-plasma_180	Sa	238	MITSUAKI j7 exp2 plasma	#D1611F
FECES-j7-exp3-plasma_173	Sa	239	FECES j7 exp3 plasma	#BB3279
BURKO-j7-exp2-plasma_173	Sa	240	BURKO j7 exp2 plasma	#40998F
AKKERMANSIA-j7-exp3-plasma_178	Sa	241	AKKER j7 exp3 plasma	#7FBC41
Nacl-j7-exp2-plasma_162	Sa	242	Nacl j7 exp2 plasma	#006D2C
ATB-j14-exp3-plasma_185	Sa	243	ATB j14 exp3 plasma	#A50F15
MITSUAKI-j7-exp2-plasma_175	Sa	244	MITSUAKI j7 exp2 plasma	#D1611F
Nacl-j7-exp3-plasma_160	Sa	245	Nacl j7 exp3 plasma	#006D2C
FECES-j14-exp3-plasma_190	Sa	246	FECES j14 exp3 plasma	#980043
BURKO-j3-exp2-plasma_149	Sa	247	BURKO j3 exp2 plasma	#80CDC1
ATB-j7-exp3-plasma_167	Sa	248	ATB j7 exp3 plasma	#EF3B2C
MITSUAKI-j14-exp2-plasma_198	Sa	249	MITSUAKI j14 exp2 plasma	#A63603
AKKERMANSIA-j3-exp3-plasma_151	Sa	250	AKKER j3 exp3 plasma	#B8E186
FECES-j7-exp3-plasma_170	Sa	251	FECES j7 exp3 plasma	#BB3279
Nacl-j3-exp3-plasma_138	Sa	252	Nacl j3 exp3 plasma	#41AB5D
AKKERMANSIA-j14-exp3-plasma_196	Sa	253	AKKER j14 exp3 plasma	#4D9221
FECES-j3-exp3-plasma_149	Sa	255	FECES j3 exp3 plasma	#DF65B0
ATB-j3-exp3-plasma_139	Sa	258	ATB j3 exp3 plasma	#FB6A4A
FECES-j14-exp3-plasma_192	Sa	262	FECES j14 exp3 plasma	#980043
AKKERMANSIA-j7-exp3-plasma_176	Sa	266	AKKER j7 exp3 plasma	#7FBC41
Nacl-j3-exp3-plasma_134	Sa	269	Nacl j3 exp3 plasma	#41AB5D
ATB-j14-exp3-plasma_184	Sa	273	ATB j14 exp3 plasma	#A50F15
AKKERMANSIA-j3-exp3-plasma_155	Sa	277	AKKER j3 exp3 plasma	#B8E186
FECES-j7-exp3-plasma_171	Sa	279	FECES j7 exp3 plasma	#BB3279
ATB-j7-exp3-plasma_166	Sa	281	ATB j7 exp3 plasma	#EF3B2C
AKKERMANSIA-j14-exp3-plasma_194	Sa	282	AKKER j14 exp3 plasma	#4D9221
ATB-j3-exp2-plasma_139	Sa	284	ATB j3 exp2 plasma	#FB6A4A
Nacl-j7-exp3-plasma_157	Sa	285	Nacl j7 exp3 plasma	#006D2C
FECES-j3-exp3-plasma_147	Sa	287	FECES j3 exp3 plasma	#DF65B0
AKKERMANSIA-j7-exp3-plasma_177	Sa	288	AKKER j7 exp3 plasma	#7FBC41
ATB-j3-exp3-plasma_142	Sa	289	ATB j3 exp3 plasma	#FB6A4A
AKKERMANSIA-j14-exp3-plasma_198	Sa	290	AKKER j14 exp3 plasma	#4D9221
FECES-j7-exp3-plasma_174	Sa	292	FECES j7 exp3 plasma	#BB3279
ATB-j14-exp3-plasma_183	Sa	293	ATB j14 exp3 plasma	#A50F15
Nacl-j7-exp3-plasma_162	Sa	295	Nacl j7 exp3 plasma	#006D2C
AKKERMANSIA-j3-exp3-plasma_153	Sa	296	AKKER j3 exp3 plasma	#B8E186
ATB-j7-exp3-plasma_163	Sa	297	ATB j7 exp3 plasma	#EF3B2C
FECES-j14-exp3-plasma_187	Sa	298	FECES j14 exp3 plasma	#980043
Nacl-j3-exp3-plasma_133	Sa	300	Nacl j3 exp3 plasma	#41AB5D
ATB-j14-exp2-plasma_181	Sa	301	ATB j14 exp2 plasma	#A50F15
ATB-j14-exp3-plasma_186	Sa	302	ATB j14 exp3 plasma	#A50F15
AKKERMANSIA-j7-exp3-plasma_179	Sa	304	AKKER j7 exp3 plasma	#7FBC41
FECES-j3-exp3-plasma_145	Sa	305	FECES j3 exp3 plasma	#DF65B0
ATB-j7-exp3-plasma_168	Sa	306	ATB j7 exp3 plasma	#EF3B2C
Nacl-j7-exp3-plasma_161	Sa	308	Nacl j7 exp3 plasma	#006D2C
FECES-j14-exp3-plasma_188	Sa	311	FECES j14 exp3 plasma	#980043
ATB-j3-exp3-plasma_144	Sa	312	ATB j3 exp3 plasma	#FB6A4A
AKKERMANSIA-j3-exp3-plasma_156	Sa	313	AKKER j3 exp3 plasma	#B8E186
FECES-j3-exp3-plasma_150	Sa	314	FECES j3 exp3 plasma	#DF65B0
ATB-j14-exp3-plasma_181	Sa	315	ATB j14 exp3 plasma	#A50F15
AKKERMANSIA-j7-exp3-plasma_180	Sa	317	AKKER j7 exp3 plasma	#7FBC41
FECES-j14-exp3-plasma_189	Sa	318	FECES j14 exp3 plasma	#980043
St_SCFA-exp2-plasma_pre	St	1	-	-
St_PA-exp3-plasma_pre	St	2	-	-
St_BA1-exp1-plasma_pre	St	3	-	-
St_AA-exp1-plasma_pre	St	4	-	-
St_BA2-exp1-plasma_pre	St	6	-	-
St_SCFA-exp2-plasma_post	St	61	-	-
St_SCFA1-exp1-plasma_pre	St	64	-	-
St_PA-exp3-plasma_post	St	65	-	-
St_PA-exp1-plasma_pre	St	67	-	-
St_BA2-exp1-plasma_post	St	93	-	-
St_BA1-exp1-plasma_post	St	95	-	-
St_BA1-exp2-plasma_pre	St	98	-	-
St_BA2-exp2-plasma_pre	St	100	-	-
St_AA-exp1-plasma_post	St	101	-	-
St_AA_exp2-plasma_pre	St	103	-	-
St_SCFA1-exp1-plasma_post	St	259	-	-
St_SCFA-exp3-plasma_pre	St	263	-	-
St_PA-exp1-plasma_post	St	264	-	-
St_PA-exp2-plasma_pre	St	268	-	-
St_BA2-exp2-plasma_post	St	271	-	-
St_AA_exp2-plasma_post	St	272	-	-
St_BA1-exp2-plasma_post	St	275	-	-
St_AA_exp3-plasma_pre	St	276	-	-
St_BA1-exp3-plasma_pre	St	278	-	-
St_BA2-exp3-plasma_pre	St	280	-	-
St_SCFA_exp3-plasma_post	St	334	-	-
St_PA-exp2-plasma_post	St	335	-	-
St_AA_exp3-plasma_post	St	338	-	-
St_BA2-exp3-plasma_post	St	340	-	-
St_BA1-exp3-plasma_post	St	341	-	-

## Sheet: FileInfos
Sid	File.sf	Date.sf	Name.sf	Batch.sf	InjOrder.sf	File.pa	Date.pa	Name.pa	Batch.pa	InjOrder.pa	File.ba	Date.ba	Name.ba	Batch.ba	InjOrder.ba	File.gc	Date.gc	Name.gc	Batch.gc	InjOrder.gc
BlM-exp2-plasma_pre	Bl_matrice-exp2-plasma_SF_3a.d	(03/10/17 00:00:00)	Bl_matrice-exp2-plasma_SF_3a	sfplasma2	2	-	(NA NA)	-	-	-	-	(NA NA)	-	-	-	-	(NA NA)	-	-	-
BlM_exp1-plasma_pre	-	(NA NA)	-	-	-	Bl_matrice-exp1-plasma_PA_5a.d	(03/22/17 00:00:00)	Bl_matrice-exp1-plasma_PA_5a	paplasma1	79	Bl_matrice-exp1-plasma_BA_4a.d	(01/09/17 00:00:00)	Bl_matrice-exp1-plasma_BA_4a	baplasma1	3	Bl_matrice-exp1-plasma_GCMRM_4a.D	(01/09/17 00:00:00)	Bl_matrice-exp1-plasma_4a	gcplasma1	2
BlM-exp2-plasma_post	Bl_matrice-exp2-plasma_SF_3b.d	(03/10/17 00:00:00)	Bl_matrice-exp2-plasma_SF_3b	sfplasma2	75	-	(NA NA)	-	-	-	-	(NA NA)	-	-	-	-	(NA NA)	-	-	-
BlM-exp1-plasma_pre	Bl_matrice-exp1-plasma_SF_5a.d	(03/13/17 00:00:00)	Bl_matrice-exp1-plasma_SF_5a	sfplasma1	78	-	(NA NA)	-	-	-	-	(NA NA)	-	-	-	-	(NA NA)	-	-	-
BlM_exp3-plasma_pre	-	(NA NA)	-	-	-	Bl_matrice-exp3-plasma_PA_3a.d	(03/19/17 00:00:00)	Bl_matrice-exp3-plasma_PA_3a	paplasma3	2	Bl_matrice-exp3-plasma_BA_4a.d	(01/12/17 00:00:00)	Bl_matrice-exp3-plasma_BA_4a	baplasma3	178	Bl_matrice-exp3-plasma_GCMRM_4a.D	(01/21/17 00:00:00)	Bl_matrice-exp3-plasma_4a	gcplasma3	176
BlM_exp1-plasma_post	-	(NA NA)	-	-	-	Bl_matrice-exp1-plasma_PA_3b.d	(03/22/17 00:00:00)	Bl_matrice-exp1-plasma_PA_3b	paplasma1	171	Bl_matrice-exp1-plasma_BA_4b.d	(01/12/17 00:00:00)	Bl_matrice-exp1-plasma_BA_4b	baplasma1	92	Bl_matrice-exp1-plasma_GCMRM_4b.D	(01/15/17 00:00:00)	Bl_matrice-exp1-plasma_4b	gcplasma1	95
BlM_exp2-plasma_pre	-	(NA NA)	-	-	-	Bl_matrice-exp2-plasma_PA_3a.d	(03/22/17 00:00:00)	Bl_matrice-exp2-plasma_PA_3a	paplasma2	174	Bl_matrice-exp2-plasma_BA_4a.d	(01/12/17 00:00:00)	Bl_matrice-exp2-plasma_BA_4a	baplasma2	97	Bl_matrice-exp2-plasma_GCMRM_4a.D	(01/18/17 00:00:00)	Bl_matrice-exp2-plasma_4a	gcplasma2	98
BlM-exp1-plasma_post	Bl_matrice-exp1-plasma_SF_5b.d	(03/16/17 00:00:00)	Bl_matrice-exp1-plasma_SF_5b	sfplasma1	170	-	(NA NA)	-	-	-	-	(NA NA)	-	-	-	-	(NA NA)	-	-	-
BlM-exp3-plasma_pre	Bl_matrice-exp3-plasma_SF_3a.d	(03/16/17 00:00:00)	Bl_matrice-exp3-plasma_SF_3a	sfplasma3	173	-	(NA NA)	-	-	-	-	(NA NA)	-	-	-	-	(NA NA)	-	-	-
BlM_exp3-plasma_post	-	(NA NA)	-	-	-	Bl_matrice-exp3-plasma_PA_3b.d	(03/22/17 00:00:00)	Bl_matrice-exp3-plasma_PA_3b	paplasma3	76	Bl_matrice-exp3-plasma_BA_4b.d	(01/12/17 00:00:00)	Bl_matrice-exp3-plasma_BA_4b	baplasma3	254	Bl_matrice-exp3-plasma_GCMRM_4b.D	(01/21/17 00:00:00)	Bl_matrice-exp3-plasma_4b	gcplasma3	251
BlM_exp2-plasma_post	-	(NA NA)	-	-	-	Bl_matrice-exp2-plasma_PA_3b.d	(03/25/17 00:00:00)	Bl_matrice-exp2-plasma_PA_3b	paplasma2	248	Bl_matrice-exp2-plasma_BA_4b.d	(01/12/17 00:00:00)	Bl_matrice-exp2-plasma_BA_4b	baplasma2	173	Bl_matrice-exp2-plasma_GCMRM_4b.D	(01/21/17 00:00:00)	Bl_matrice-exp2-plasma_4b	gcplasma2	173
BlM-exp3-plasma_post	Bl_matrice-exp3-plasma_SF_3b.d	(03/16/17 00:00:00)	Bl_matrice-exp3-plasma_SF_3b	sfplasma3	247	-	(NA NA)	-	-	-	-	(NA NA)	-	-	-	-	(NA NA)	-	-	-
QC-exp2-plasma_5a	QC_batch-exp2-plasma_SF_5a.d	(03/10/17 00:00:00)	QC_batch-exp2-plasma_SF_5a	sfplasma2	3	-	(NA NA)	-	-	-	-	(NA NA)	-	-	-	-	(NA NA)	-	-	-
QC_exp123-plasma_pre.baplasma1	-	(NA NA)	-	-	-	-	(NA NA)	-	-	-	QC_batch-exp123-plasma_BA_6a.d	(01/09/17 00:00:00)	QC_batch-exp123-plasma_BA_6a	baplasma1	4	-	(NA NA)	-	-	-
QC-exp2-plasma_5b	QC_batch-exp2-plasma_SF_5b.d	(03/10/17 00:00:00)	QC_batch-exp2-plasma_SF_5b	sfplasma2	14	-	(NA NA)	-	-	-	-	(NA NA)	-	-	-	-	(NA NA)	-	-	-
QC_exp1-plasma_5b	-	(NA NA)	-	-	-	-	(NA NA)	-	-	-	QC_batch-exp1-plasma_BA_5b.d	(01/09/17 00:00:00)	QC_batch-exp1-plasma_BA_5b	baplasma1	16	QC_batch-exp1-plasma_GCMRM_5b.D	(01/12/17 00:00:00)	QC_batch-exp1-plasma_5b	gcplasma1	16
QC-exp2-plasma_5c	QC_batch-exp2-plasma_SF_5c.d	(03/10/17 00:00:00)	QC_batch-exp2-plasma_SF_5c	sfplasma2	25	-	(NA NA)	-	-	-	-	(NA NA)	-	-	-	-	(NA NA)	-	-	-
QC_exp1-plasma_5c	-	(NA NA)	-	-	-	-	(NA NA)	-	-	-	QC_batch-exp1-plasma_BA_5c.d	(01/09/17 00:00:00)	QC_batch-exp1-plasma_BA_5c	baplasma1	27	QC_batch-exp1-plasma_GCMRM_5c.D	(01/12/17 00:00:00)	QC_batch-exp1-plasma_5c	gcplasma1	29
QC_exp1-plasma_5a	-	(NA NA)	-	-	-	QC_batch-exp1-plasma_PA_5a.d	(03/22/17 00:00:00)	QC_batch-exp1-plasma_PA_5a	paplasma1	80	QC_batch-exp1-plasma_BA_5a.d	(01/09/17 00:00:00)	QC_batch-exp1-plasma_BA_5a	baplasma1	5	QC_batch-exp1-plasma_GCMRM_5a.D	(01/12/17 00:00:00)	QC_batch-exp1-plasma_5a	gcplasma1	3
QC-exp2-plasma_5d	QC_batch-exp2-plasma_SF_5d.d	(03/10/17 00:00:00)	QC_batch-exp2-plasma_SF_5d	sfplasma2	35	-	(NA NA)	-	-	-	-	(NA NA)	-	-	-	-	(NA NA)	-	-	-
QC_exp3-plasma_5d	-	(NA NA)	-	-	-	QC_batch-exp3-plasma_PA_5d.d	(03/22/17 00:00:00)	QC_batch-exp3-plasma_PA_5d	paplasma3	38	-	(NA NA)	-	-	-	-	(NA NA)	-	-	-
QC_exp1-plasma_5d	-	(NA NA)	-	-	-	-	(NA NA)	-	-	-	QC_batch-exp1-plasma_BA_5d.d	(01/09/17 00:00:00)	QC_batch-exp1-plasma_BA_5d	baplasma1	39	QC_batch-exp1-plasma_GCMRM_5d.D	(01/12/17 00:00:00)	QC_batch-exp1-plasma_5d	gcplasma1	42
QC-exp2-plasma_5e	QC_batch-exp2-plasma_SF_5e.d	(03/10/17 00:00:00)	QC_batch-exp2-plasma_SF_5e	sfplasma2	46	-	(NA NA)	-	-	-	-	(NA NA)	-	-	-	-	(NA NA)	-	-	-
QC_exp1-plasma_6a	-	(NA NA)	-	-	-	-	(NA NA)	-	-	-	-	(NA NA)	-	-	-	QC_batch-exp1-plasma_GCMRM_6a.D	(01/12/17 00:00:00)	QC_batch-exp1-plasma_6a	gcplasma1	54
QC-exp2-plasma_5f	QC_batch-exp2-plasma_SF_5f.d	(03/10/17 00:00:00)	QC_batch-exp2-plasma_SF_5f	sfplasma2	58	-	(NA NA)	-	-	-	-	(NA NA)	-	-	-	-	(NA NA)	-	-	-
QC_exp3-plasma_5f	-	(NA NA)	-	-	-	QC_batch-exp3-plasma_PA_5f.d	(03/22/17 00:00:00)	QC_batch-exp3-plasma_PA_5f	paplasma3	62	-	(NA NA)	-	-	-	-	(NA NA)	-	-	-
QC_exp1-plasma_5f	-	(NA NA)	-	-	-	-	(NA NA)	-	-	-	QC_batch-exp1-plasma_BA_5f.d	(01/09/17 00:00:00)	QC_batch-exp1-plasma_BA_5f	baplasma1	64	-	(NA NA)	-	-	-
QC_exp1-plasma_6b	-	(NA NA)	-	-	-	-	(NA NA)	-	-	-	-	(NA NA)	-	-	-	QC_batch-exp1-plasma_GCMRM_6b.D	(01/12/17 00:00:00)	QC_batch-exp1-plasma_6b	gcplasma1	67
QC-exp2-plasma_4f	QC_batch-exp2-plasma_SF_4f.d	(03/10/17 00:00:00)	QC_batch-exp2-plasma_SF_4f	sfplasma2	73	-	(NA NA)	-	-	-	-	(NA NA)	-	-	-	-	(NA NA)	-	-	-
QC_exp1-plasma_5e	-	(NA NA)	-	-	-	-	(NA NA)	-	-	-	QC_batch-exp1-plasma_BA_5e.d	(01/09/17 00:00:00)	QC_batch-exp1-plasma_BA_5e	baplasma1	52	QC_batch-exp1-plasma_GCMRM_5e.D	(01/15/17 00:00:00)	QC_batch-exp1-plasma_5e	gcplasma1	94
QC-exp2-plasma_5g	QC_batch-exp2-plasma_SF_5g.d	(03/10/17 00:00:00)	QC_batch-exp2-plasma_SF_5g	sfplasma2	74	-	(NA NA)	-	-	-	-	(NA NA)	-	-	-	-	(NA NA)	-	-	-
QC_exp3-plasma_5g	-	(NA NA)	-	-	-	QC_batch-exp3-plasma_PA_5g.d	(03/22/17 00:00:00)	QC_batch-exp3-plasma_PA_5g	paplasma3	75	-	(NA NA)	-	-	-	-	(NA NA)	-	-	-
QC_exp1-plasma_5g	-	(NA NA)	-	-	-	-	(NA NA)	-	-	-	QC_batch-exp1-plasma_BA_5g.d	(01/09/17 00:00:00)	QC_batch-exp1-plasma_BA_5g	baplasma1	75	-	(NA NA)	-	-	-
QC-exp1-plasma_7a	QC_batch-exp1-plasma_SF_7a.d	(03/13/17 00:00:00)	QC_batch-exp1-plasma_SF_7a	sfplasma1	79	-	(NA NA)	-	-	-	-	(NA NA)	-	-	-	-	(NA NA)	-	-	-
QC_exp1-plasma_6c	-	(NA NA)	-	-	-	-	(NA NA)	-	-	-	-	(NA NA)	-	-	-	QC_batch-exp1-plasma_GCMRM_6c.D	(01/12/17 00:00:00)	QC_batch-exp1-plasma_6c	gcplasma1	79
QC_exp3-plasma_5a	-	(NA NA)	-	-	-	QC_batch-exp3-plasma_PA_5a.d	(03/22/17 00:00:00)	QC_batch-exp3-plasma_PA_5a	paplasma3	3	-	(NA NA)	-	-	-	QC_batch-exp3-plasma_GCMRM_5a.D	(01/21/17 00:00:00)	QC_batch-exp3-plasma_5a	gcplasma3	177
QC_exp1-plasma_5i	-	(NA NA)	-	-	-	-	(NA NA)	-	-	-	QC_batch-exp1-plasma_BA_5i.d	(01/12/17 00:00:00)	QC_batch-exp1-plasma_BA_5i	baplasma1	90	-	(NA NA)	-	-	-
QC_exp123-plasma_post.baplasma1	-	(NA NA)	-	-	-	-	(NA NA)	-	-	-	QC_batch-exp123-plasma_BA_6b.d	(01/12/17 00:00:00)	QC_batch-exp123-plasma_BA_6b	baplasma1	91	-	(NA NA)	-	-	-
QC-exp1-plasma_7b	QC_batch-exp1-ileon_BA_7b.d	(03/13/17 00:00:00)	QC_batch-exp1-ileon_BA_7b	sfplasma1	92	-	(NA NA)	-	-	-	-	(NA NA)	-	-	-	-	(NA NA)	-	-	-
QC_batch-exp1-plasma_PA_5b	-	(NA NA)	-	-	-	QC_batch-exp1-plasma_PA_5b.d	(03/22/17 00:00:00)	QC_batch-exp1-plasma_PA_5b	paplasma1	93	-	(NA NA)	-	-	-	-	(NA NA)	-	-	-
QC_exp1-plasma_6d	-	(NA NA)	-	-	-	-	(NA NA)	-	-	-	-	(NA NA)	-	-	-	QC_batch-exp1-plasma_GCMRM_6d.D	(01/15/17 00:00:00)	QC_batch-exp1-plasma_6d	gcplasma1	93
QC_exp123-plasma_pre.baplasma2	-	(NA NA)	-	-	-	-	(NA NA)	-	-	-	QC_batch-exp123-plasma_BA_6a.d	(01/12/17 00:00:00)	QC_batch-exp123-plasma_BA_6a	baplasma2	98	-	(NA NA)	-	-	-
QC_exp2-plasma_5a	-	(NA NA)	-	-	-	-	(NA NA)	-	-	-	QC_batch-exp2-plasma_BA_5a.d	(01/12/17 00:00:00)	QC_batch-exp2-plasma_BA_5a	baplasma2	99	QC_batch-exp2-plasma_GCMRM_5a.D	(01/18/17 00:00:00)	QC_batch-exp2-plasma_5a	gcplasma2	99
QC_exp3-plasma_5b	-	(NA NA)	-	-	-	QC_batch-exp3-plasma_PA_5b.d	(03/22/17 00:00:00)	QC_batch-exp3-plasma_PA_5b	paplasma3	14	-	(NA NA)	-	-	-	QC_batch-exp3-plasma_GCMRM_5b.D	(01/21/17 00:00:00)	QC_batch-exp3-plasma_5b	gcplasma3	188
QC-exp1-plasma_7c	QC_batch-exp1-ileon_BA_7c.d	(03/13/17 00:00:00)	QC_batch-exp1-ileon_BA_7c	sfplasma1	105	-	(NA NA)	-	-	-	-	(NA NA)	-	-	-	-	(NA NA)	-	-	-
QC_batch-exp1-plasma_PA_5c	-	(NA NA)	-	-	-	QC_batch-exp1-plasma_PA_5c.d	(03/22/17 00:00:00)	QC_batch-exp1-plasma_PA_5c	paplasma1	106	-	(NA NA)	-	-	-	-	(NA NA)	-	-	-
QC_exp2-plasma_5b	-	(NA NA)	-	-	-	-	(NA NA)	-	-	-	QC_batch-exp2-plasma_BA_5b.d	(01/12/17 00:00:00)	QC_batch-exp2-plasma_BA_5b	baplasma2	111	QC_batch-exp2-plasma_GCMRM_5b.D	(01/18/17 00:00:00)	QC_batch-exp2-plasma_5b	gcplasma2	111
QC_exp3-plasma_5c	-	(NA NA)	-	-	-	QC_batch-exp3-plasma_PA_5c.d	(03/22/17 00:00:00)	QC_batch-exp3-plasma_PA_5c	paplasma3	26	-	(NA NA)	-	-	-	QC_batch-exp3-plasma_GCMRM_5c.D	(01/21/17 00:00:00)	QC_batch-exp3-plasma_5c	gcplasma3	200
QC-exp1-plsma_7d	QC_batch-exp1-ileon_BA_7d.d	(03/13/17 00:00:00)	QC_batch-exp1-ileon_BA_7d	sfplasma1	118	-	(NA NA)	-	-	-	-	(NA NA)	-	-	-	-	(NA NA)	-	-	-
QC_batch-exp1-plasma_PA_5d	-	(NA NA)	-	-	-	QC_batch-exp1-plasma_PA_5d.d	(03/22/17 00:00:00)	QC_batch-exp1-plasma_PA_5d	paplasma1	119	-	(NA NA)	-	-	-	-	(NA NA)	-	-	-
QC_exp2-plasma_5c	-	(NA NA)	-	-	-	-	(NA NA)	-	-	-	QC_batch-exp2-plasma_BA_5c.d	(01/12/17 00:00:00)	QC_batch-exp2-plasma_BA_5c	baplasma2	122	QC_batch-exp2-plasma_GCMRM_5c.D	(01/18/17 00:00:00)	QC_batch-exp2-plasma_5c	gcplasma2	122
QC-exp1-plasma_7e	QC_batch-exp1-plasma_SF_7e.d	(03/13/17 00:00:00)	QC_batch-exp1-plasma_SF_7e	sfplasma1	131	-	(NA NA)	-	-	-	-	(NA NA)	-	-	-	-	(NA NA)	-	-	-
QC_batch-exp1-plasma_PA_5e	-	(NA NA)	-	-	-	QC_batch-exp1-plasma_PA_5e.d	(03/22/17 00:00:00)	QC_batch-exp1-plasma_PA_5e	paplasma1	132	-	(NA NA)	-	-	-	-	(NA NA)	-	-	-
QC_exp2-plasma_6a	-	(NA NA)	-	-	-	-	(NA NA)	-	-	-	-	(NA NA)	-	-	-	QC_batch-exp2-plasma_GCMRM_6a.D	(01/18/17 00:00:00)	QC_batch-exp2-plasma_6a	gcplasma2	132
QC_exp2-plasma_5e	-	(NA NA)	-	-	-	-	(NA NA)	-	-	-	QC_batch-exp2-plasma_BA_5e.d	(01/12/17 00:00:00)	QC_batch-exp2-plasma_BA_5e	baplasma2	143	-	(NA NA)	-	-	-
QC_exp2-plasma_6b	-	(NA NA)	-	-	-	-	(NA NA)	-	-	-	-	(NA NA)	-	-	-	QC_batch-exp2-plasma_GCMRM_6b.D	(01/18/17 00:00:00)	QC_batch-exp2-plasma_6b	gcplasma2	143
QC-exp1-plasma_7f	QC_batch-exp1-plasma_SF_7f.d	(03/16/17 00:00:00)	QC_batch-exp1-plasma_SF_7f	sfplasma1	144	-	(NA NA)	-	-	-	-	(NA NA)	-	-	-	-	(NA NA)	-	-	-
QC_batch-exp1-plasma_PA_5f	-	(NA NA)	-	-	-	QC_batch-exp1-plasma_PA_5f.d	(03/22/17 00:00:00)	QC_batch-exp1-plasma_PA_5f	paplasma1	145	-	(NA NA)	-	-	-	-	(NA NA)	-	-	-
QC_exp3-plasma_5e	-	(NA NA)	-	-	-	QC_batch-exp3-plasma_PA_5e.d	(03/22/17 00:00:00)	QC_batch-exp3-plasma_PA_5e	paplasma3	50	-	(NA NA)	-	-	-	QC_batch-exp3-plasma_GCMRM_5e.D	(01/21/17 00:00:00)	QC_batch-exp3-plasma_5e	gcplasma3	250
QC_exp2-plasma_5d	-	(NA NA)	-	-	-	-	(NA NA)	-	-	-	QC_batch-exp2-plasma_BA_5d.d	(01/12/17 00:00:00)	QC_batch-exp2-plasma_BA_5d	baplasma2	132	QC_batch-exp2-plasma_GCMRM_5d.D	(01/21/17 00:00:00)	QC_batch-exp2-plasma_5d	gcplasma2	172
QC-exp1-plasma_7g	QC_batch-exp1-plasma_SF_7g.d	(03/16/17 00:00:00)	QC_batch-exp1-plasma_SF_7g	sfplasma1	156	-	(NA NA)	-	-	-	-	(NA NA)	-	-	-	-	(NA NA)	-	-	-
QC_exp2-plasma_5f	-	(NA NA)	-	-	-	-	(NA NA)	-	-	-	QC_batch-exp2-plasma_BA_5f.d	(01/12/17 00:00:00)	QC_batch-exp2-plasma_BA_5f	baplasma2	156	-	(NA NA)	-	-	-
QC_exp2-plasma_6c	-	(NA NA)	-	-	-	-	(NA NA)	-	-	-	-	(NA NA)	-	-	-	QC_batch-exp2-plasma_GCMRM_6c.D	(01/18/17 00:00:00)	QC_batch-exp2-plasma_6c	gcplasma2	156
QC_batch-exp1-plasma_PA_5g	-	(NA NA)	-	-	-	QC_batch-exp1-plasma_PA_5g.d	(03/22/17 00:00:00)	QC_batch-exp1-plasma_PA_5g	paplasma1	157	-	(NA NA)	-	-	-	-	(NA NA)	-	-	-
QC-exp1-plasma_7h	QC_batch-exp1-plasma_SF_7h.d	(03/16/17 00:00:00)	QC_batch-exp1-plasma_SF_7h	sfplasma1	169	-	(NA NA)	-	-	-	-	(NA NA)	-	-	-	-	(NA NA)	-	-	-
QC_exp1-plasma_5h	-	(NA NA)	-	-	-	QC_batch-exp1-plasma_PA_5h.d	(03/22/17 00:00:00)	QC_batch-exp1-plasma_PA_5h	paplasma1	170	-	(NA NA)	-	-	-	-	(NA NA)	-	-	-
QC_exp2-plasma_5g	-	(NA NA)	-	-	-	-	(NA NA)	-	-	-	QC_batch-exp2-plasma_BA_5g.d	(01/12/17 00:00:00)	QC_batch-exp2-plasma_BA_5g	baplasma2	171	-	(NA NA)	-	-	-
QC_exp2-plasma_6d	-	(NA NA)	-	-	-	-	(NA NA)	-	-	-	-	(NA NA)	-	-	-	QC_batch-exp2-plasma_GCMRM_6d.D	(01/21/17 00:00:00)	QC_batch-exp2-plasma_6d	gcplasma2	171
QC_exp123-plasma_post.baplasma2	-	(NA NA)	-	-	-	-	(NA NA)	-	-	-	QC_batch-exp123-plasma_BA_6b.d	(01/12/17 00:00:00)	QC_batch-exp123-plasma_BA_6b	baplasma2	172	-	(NA NA)	-	-	-
QC-exp3-plasma_5a	QC_batch-exp3-plasma_SF_5a.d	(03/16/17 00:00:00)	QC_batch-exp3-plasma_SF_5a	sfplasma3	174	-	(NA NA)	-	-	-	-	(NA NA)	-	-	-	-	(NA NA)	-	-	-
QC_batch-exp2-plasma_5a	-	(NA NA)	-	-	-	QC_batch-exp2-plasma_PA_5a.d	(03/25/17 00:00:00)	QC_batch-exp2-plasma_PA_5a	paplasma2	175	-	(NA NA)	-	-	-	-	(NA NA)	-	-	-
QC_batch-exp123-plasma_pre	-	(NA NA)	-	-	-	-	(NA NA)	-	-	-	QC_batch-exp123-plasma_BA_6a.d	(01/12/17 00:00:00)	QC_batch-exp123-plasma_BA_6a	baplasma3	179	-	(NA NA)	-	-	-
QC_batch-exp3-plasma_5a	-	(NA NA)	-	-	-	-	(NA NA)	-	-	-	QC_batch-exp3-plasma_BA_5a.d	(01/12/17 00:00:00)	QC_batch-exp3-plasma_BA_5a	baplasma3	180	-	(NA NA)	-	-	-
QC-exp3-plasma_5b	QC_batch-exp3-plasma_SF_5b.d	(03/16/17 00:00:00)	QC_batch-exp3-plasma_SF_5b	sfplasma3	185	-	(NA NA)	-	-	-	-	(NA NA)	-	-	-	-	(NA NA)	-	-	-
QC_batch-exp2-plasma_5b	-	(NA NA)	-	-	-	QC_batch-exp2-plasma_PA_5b.d	(03/25/17 00:00:00)	QC_batch-exp2-plasma_PA_5b	paplasma2	187	-	(NA NA)	-	-	-	-	(NA NA)	-	-	-
QC_batch-exp3-plasma_5b	-	(NA NA)	-	-	-	-	(NA NA)	-	-	-	QC_batch-exp3-plasma_BA_5b.d	(01/12/17 00:00:00)	QC_batch-exp3-plasma_BA_5b	baplasma3	191	-	(NA NA)	-	-	-
QC-exp3-plasma_5c	QC_batch-exp3-plasma_SF_5c.d	(03/16/17 00:00:00)	QC_batch-exp3-plasma_SF_5c	sfplasma3	197	-	(NA NA)	-	-	-	-	(NA NA)	-	-	-	-	(NA NA)	-	-	-
QC_batch-exp2-plasma_5c	-	(NA NA)	-	-	-	QC_batch-exp2-plasma_PA_5c.d	(03/25/17 00:00:00)	QC_batch-exp2-plasma_PA_5c	paplasma2	198	-	(NA NA)	-	-	-	-	(NA NA)	-	-	-
QC_batch-exp3-plasma_5c	-	(NA NA)	-	-	-	-	(NA NA)	-	-	-	QC_batch-exp3-plasma_BA_5c.d	(01/12/17 00:00:00)	QC_batch-exp3-plasma_BA_5c	baplasma3	203	-	(NA NA)	-	-	-
QC_batch-exp2-plasma_5d	-	(NA NA)	-	-	-	QC_batch-exp2-plasma_PA_5d.d	(03/25/17 00:00:00)	QC_batch-exp2-plasma_PA_5d	paplasma2	208	-	(NA NA)	-	-	-	-	(NA NA)	-	-	-
QC-exp3-plasma_5d	QC_batch-exp3-plasma_SF_5d.d	(03/16/17 00:00:00)	QC_batch-exp3-plasma_SF_5d	sfplasma3	209	-	(NA NA)	-	-	-	-	(NA NA)	-	-	-	-	(NA NA)	-	-	-
QC_exp3-plasma_6a	-	(NA NA)	-	-	-	-	(NA NA)	-	-	-	-	(NA NA)	-	-	-	QC_batch-exp3-plasma_GCMRM_6a.D	(01/21/17 00:00:00)	QC_batch-exp3-plasma_6a	gcplasma3	212
QC_batch-exp3-plasma_5d	-	(NA NA)	-	-	-	-	(NA NA)	-	-	-	QC_batch-exp3-plasma_BA_5d.d	(01/12/17 00:00:00)	QC_batch-exp3-plasma_BA_5d	baplasma3	215	-	(NA NA)	-	-	-
QC_batch-exp2-plasma_5e	-	(NA NA)	-	-	-	QC_batch-exp2-plasma_PA_5e.d	(03/25/17 00:00:00)	QC_batch-exp2-plasma_PA_5e	paplasma2	219	-	(NA NA)	-	-	-	-	(NA NA)	-	-	-
QC-exp3-plasma_5e	QC_batch-exp3-plasma_SF_5e.d	(03/16/17 00:00:00)	QC_batch-exp3-plasma_SF_5e	sfplasma3	221	-	(NA NA)	-	-	-	-	(NA NA)	-	-	-	-	(NA NA)	-	-	-
QC_exp3-plasma_6b	-	(NA NA)	-	-	-	-	(NA NA)	-	-	-	-	(NA NA)	-	-	-	QC_batch-exp3-plasma_GCMRM_6b.D	(01/21/17 00:00:00)	QC_batch-exp3-plasma_6b	gcplasma3	224
QC_batch-exp3-plasma_5e	-	(NA NA)	-	-	-	-	(NA NA)	-	-	-	QC_batch-exp3-plasma_BA_5e.d	(01/12/17 00:00:00)	QC_batch-exp3-plasma_BA_5e	baplasma3	227	-	(NA NA)	-	-	-
QC_batch-exp2-plasma_5f	-	(NA NA)	-	-	-	QC_batch-exp2-plasma_PA_5f.d	(03/25/17 00:00:00)	QC_batch-exp2-plasma_PA_5f	paplasma2	232	-	(NA NA)	-	-	-	-	(NA NA)	-	-	-
QC-exp3-plasma_5f	QC_batch-exp3-plasma_SF_5f.d	(03/16/17 00:00:00)	QC_batch-exp3-plasma_SF_5f	sfplasma3	233	-	(NA NA)	-	-	-	-	(NA NA)	-	-	-	-	(NA NA)	-	-	-
QC_exp3-plasma_6c	-	(NA NA)	-	-	-	-	(NA NA)	-	-	-	-	(NA NA)	-	-	-	QC_batch-exp3-plasma_GCMRM_6c.D	(01/21/17 00:00:00)	QC_batch-exp3-plasma_6c	gcplasma3	236
QC_batch-exp3-plasma_5f	-	(NA NA)	-	-	-	-	(NA NA)	-	-	-	QC_batch-exp3-plasma_BA_5f.d	(01/12/17 00:00:00)	QC_batch-exp3-plasma_BA_5f	baplasma3	239	-	(NA NA)	-	-	-
QC-exp3-plasma_5g	QC_batch-exp3-plasma_SF_5g.d	(03/16/17 00:00:00)	QC_batch-exp3-plasma_SF_5g	sfplasma3	246	-	(NA NA)	-	-	-	-	(NA NA)	-	-	-	-	(NA NA)	-	-	-
QC_batch-exp2-plasma_5g	-	(NA NA)	-	-	-	QC_batch-exp2-plasma_PA_5g.d	(03/25/17 00:00:00)	QC_batch-exp2-plasma_PA_5g	paplasma2	247	-	(NA NA)	-	-	-	-	(NA NA)	-	-	-
QC_exp3-plasma_6d	-	(NA NA)	-	-	-	-	(NA NA)	-	-	-	-	(NA NA)	-	-	-	QC_batch-exp3-plasma_GCMRM_6d.D	(01/21/17 00:00:00)	QC_batch-exp3-plasma_6d	gcplasma3	249
QC_batch-exp3-plasma_5g	-	(NA NA)	-	-	-	-	(NA NA)	-	-	-	QC_batch-exp3-plasma_BA_5g.d	(01/12/17 00:00:00)	QC_batch-exp3-plasma_BA_5g	baplasma3	252	-	(NA NA)	-	-	-
QC_batch-exp123-plasma_post	-	(NA NA)	-	-	-	-	(NA NA)	-	-	-	QC_batch-exp123-plasma_BA_6b.d	(01/12/17 00:00:00)	QC_batch-exp123-plasma_BA_6b	baplasma3	253	-	(NA NA)	-	-	-
HIRAE-j14-exp1-plasma_239	Sa_HIRAE-M5-j14-exp1-plasma_SF_239.d	(03/13/17 00:00:00)	Sa_HIRAE-M5-j14-exp1-plasma_SF_239	sfplasma1	82	Sa_HIRAE-M5-j14-exp1-plasma_PA_239.d	(03/22/17 00:00:00)	Sa_HIRAE-M5-j14-exp1-plasma_PA_239	paplasma1	83	Sa_HIRAE-M5-j14-exp1-plasma_BA_239bis.d	(01/09/17 00:00:00)	Sa_HIRAE-M5-j14-exp1-plasma_BA_239bis	baplasma1	24	Sa_HIRAE-M5-j14-exp1-plasma_GCMRM_239.D	(01/12/17 00:00:00)	Sa_HIRAE-M5-j14-exp1-plasma_239	gcplasma1	6
BARNECIELA-j14-exp1-plasma_252	Sa_BARNECIELA-M6-j14-exp1-plasma_SF_252.d	(03/13/17 00:00:00)	Sa_BARNECIELA-M6-j14-exp1-plasma_SF_252	sfplasma1	85	Sa_BARNECIELA-M6-j14-exp1-plasma_PA_252.d	(03/22/17 00:00:00)	Sa_BARNECIELA-M6-j14-exp1-plasma_PA_252	paplasma1	86	Sa_BARNECIELA-M6-j14-exp1-plasma_BA_252bis.d	(01/09/17 00:00:00)	Sa_BARNECIELA-M6-j14-exp1-plasma_BA_252bis	baplasma1	23	Sa_BARNECIELA-M6-j14-exp1-plasma_GCMRM_252.D	(01/12/17 00:00:00)	Sa_BARNECIELA-M6-j14-exp1-plasma_252	gcplasma1	9
ATB-j7-exp1-plasma_207	Sa_ATB-M3-j7-exp1-plasma_SF_207.d	(03/13/17 00:00:00)	Sa_ATB-M3-j7-exp1-plasma_SF_207	sfplasma1	81	Sa_ATB-M3-j7-exp1-plasma_PA_207.d	(03/22/17 00:00:00)	Sa_ATB-M3-j7-exp1-plasma_PA_207	paplasma1	82	Sa_ATB-M3-j7-exp1-plasma_BA_207bis.d	(01/09/17 00:00:00)	Sa_ATB-M3-j7-exp1-plasma_BA_207bis	baplasma1	43	Sa_ATB-M3-j7-exp1-plasma_GCMRM_207.D	(01/12/17 00:00:00)	Sa_ATB-M3-j7-exp1-plasma_207	gcplasma1	5
HIRAE-j14-exp1-plasma_235	Sa_HIRAE-M1-j14-exp1-plasma_SF_235.d	(03/13/17 00:00:00)	Sa_HIRAE-M1-j14-exp1-plasma_SF_235	sfplasma1	80	Sa_HIRAE-M1-j14-exp1-plasma_PA_235.d	(03/22/17 00:00:00)	Sa_HIRAE-M1-j14-exp1-plasma_PA_235	paplasma1	81	Sa_HIRAE-M1-j14-exp1-plasma_BA_235bis.d	(01/09/17 00:00:00)	Sa_HIRAE-M1-j14-exp1-plasma_BA_235bis	baplasma1	56	Sa_HIRAE-M1-j14-exp1-plasma_GCMRM_235.D	(01/12/17 00:00:00)	Sa_HIRAE-M1-j14-exp1-plasma_235	gcplasma1	4
BARNECIELA-j3-exp1-plasma_195	Sa_BARNECIELA-M3-j3-exp1-plasma_SF_195.d	(03/13/17 00:00:00)	Sa_BARNECIELA-M3-j3-exp1-plasma_SF_195	sfplasma1	96	Sa_BARNECIELA-M3-j3-exp1-plasma_PA_195.d	(03/22/17 00:00:00)	Sa_BARNECIELA-M3-j3-exp1-plasma_PA_195	paplasma1	97	Sa_BARNECIELA-M3-j3-exp1-plasma_BA_195.d	(01/09/17 00:00:00)	Sa_BARNECIELA-M3-j3-exp1-plasma_BA_195	baplasma1	9	Sa_BARNECIELA-M3-j3-exp1-plasma_GCMRM_195.D	(01/12/17 00:00:00)	Sa_BARNECIELA-M3-j3-exp1-plasma_195	gcplasma1	20
ATB-j3-exp1-plasma_179	Sa_ATB-M5-j3-exp1-plasma_SF_179.d	(03/13/17 00:00:00)	Sa_ATB-M5-j3-exp1-plasma_SF_179	sfplasma1	90	Sa_ATB-M5-j3-exp1-plasma_PA_179.d	(03/22/17 00:00:00)	Sa_ATB-M5-j3-exp1-plasma_PA_179	paplasma1	91	Sa_ATB-M5-j3-exp1-plasma_BA_179.d	(01/09/17 00:00:00)	Sa_ATB-M5-j3-exp1-plasma_BA_179	baplasma1	29	Sa_ATB-M5-j3-exp1-plasma_GCMRM_179.D	(01/12/17 00:00:00)	Sa_ATB-M5-j3-exp1-plasma_179	gcplasma1	14
BARNECIELA-j14-exp1-plasma_247	Sa_BARNECIELA-M1-j14-exp1-plasma_SF_247.d	(03/13/17 00:00:00)	Sa_BARNECIELA-M1-j14-exp1-plasma_SF_247	sfplasma1	88	Sa_BARNECIELA-M1-j14-exp1-plasma_PA_247.d	(03/22/17 00:00:00)	Sa_BARNECIELA-M1-j14-exp1-plasma_PA_247	paplasma1	89	Sa_BARNECIELA-M1-j14-exp1-plasma_BA_247bis.d	(01/09/17 00:00:00)	Sa_BARNECIELA-M1-j14-exp1-plasma_BA_247bis	baplasma1	44	Sa_BARNECIELA-M1-j14-exp1-plasma_GCMRM_247.D	(01/12/17 00:00:00)	Sa_BARNECIELA-M1-j14-exp1-plasma_247	gcplasma1	12
Nacl-j7-exp1-plasma_199	Sa_Nacl-M1-j7-exp1-plasma_SF_199.d	(03/13/17 00:00:00)	Sa_Nacl-M1-j7-exp1-plasma_SF_199	sfplasma1	83	Sa_Nacl-M1-j7-exp1-plasma_PA_199.d	(03/22/17 00:00:00)	Sa_Nacl-M1-j7-exp1-plasma_PA_199	paplasma1	84	Sa_Nacl-M1-j7-exp1-plasma_BA_199.d	(01/09/17 00:00:00)	Sa_Nacl-M1-j7-exp1-plasma_BA_199	baplasma1	66	Sa_Nacl-M1-j7-exp1-plasma_GCMRM_199.D	(01/12/17 00:00:00)	Sa_Nacl-M1-j7-exp1-plasma_199	gcplasma1	7
HIRAE-j3-exp1-plasma_185	Sa_HIRAE-M5-j3-exp1-plasma_SF_185.d	(03/13/17 00:00:00)	Sa_HIRAE-M5-j3-exp1-plasma_SF_185	sfplasma1	94	Sa_HIRAE-M5-j3-exp1-plasma_PA_185.d	(03/22/17 00:00:00)	Sa_HIRAE-M5-j3-exp1-plasma_PA_185	paplasma1	95	Sa_HIRAE-M5-j3-exp1-plasma_BA_185.d	(01/09/17 00:00:00)	Sa_HIRAE-M5-j3-exp1-plasma_BA_185	baplasma1	33	Sa_HIRAE-M5-j3-exp1-plasma_GCMRM_185.D	(01/12/17 00:00:00)	Sa_HIRAE-M5-j3-exp1-plasma_185	gcplasma1	18
ATB-j14-exp1-plasma_230	Sa_ATB-M2-j14-exp1-plasma_SF_230.d	(03/13/17 00:00:00)	Sa_ATB-M2-j14-exp1-plasma_SF_230	sfplasma1	95	Sa_ATB-M2-j14-exp1-plasma_PA_230.d	(03/22/17 00:00:00)	Sa_ATB-M2-j14-exp1-plasma_PA_230	paplasma1	96	Sa_ATB-M2-j14-exp1-plasma_BA_230bis.d	(01/09/17 00:00:00)	Sa_ATB-M2-j14-exp1-plasma_BA_230bis	baplasma1	31	Sa_ATB-M2-j14-exp1-plasma_GCMRM_230.D	(01/12/17 00:00:00)	Sa_ATB-M2-j14-exp1-plasma_230	gcplasma1	19
FRAGILIS-j3-exp1-plasma_189	Sa_FRAGILIS-M3-j3-exp1-plasma_SF_189.d	(03/13/17 00:00:00)	Sa_FRAGILIS-M3-j3-exp1-plasma_SF_189	sfplasma1	102	Sa_FRAGILIS-M3-j3-exp1-plasma_PA_189.d	(03/22/17 00:00:00)	Sa_FRAGILIS-M3-j3-exp1-plasma_PA_189	paplasma1	103	Sa_FRAGILIS-M3-j3-exp1-plasma_BA_189.d	(01/09/17 00:00:00)	Sa_FRAGILIS-M3-j3-exp1-plasma_BA_189	baplasma1	15	Sa_FRAGILIS-M3-j3-exp1-plasma_GCMRM_189.D	(01/12/17 00:00:00)	Sa_FRAGILIS-M3-j3-exp1-plasma_189	gcplasma1	26
ATB-j14-exp1-plasma_232	Sa_ATB-M4-j14-exp1-plasma_SF_232.d	(03/13/17 00:00:00)	Sa_ATB-M4-j14-exp1-plasma_SF_232	sfplasma1	86	Sa_ATB-M4-j14-exp1-plasma_PA_232.d	(03/22/17 00:00:00)	Sa_ATB-M4-j14-exp1-plasma_PA_232	paplasma1	87	Sa_ATB-M4-j14-exp1-plasma_BA_232bis.d	(01/09/17 00:00:00)	Sa_ATB-M4-j14-exp1-plasma_BA_232bis	baplasma1	69	Sa_ATB-M4-j14-exp1-plasma_GCMRM_232.D	(01/12/17 00:00:00)	Sa_ATB-M4-j14-exp1-plasma_232	gcplasma1	10
ATB-j3-exp1-plasma_175	Sa_ATB-M1-j3-exp1-plasma_SF_175.d	(03/13/17 00:00:00)	Sa_ATB-M1-j3-exp1-plasma_SF_175	sfplasma1	89	Sa_ATB-M1-j3-exp1-plasma_PA_175.d	(03/22/17 00:00:00)	Sa_ATB-M1-j3-exp1-plasma_PA_175	paplasma1	90	Sa_ATB-M1-j3-exp1-plasma_BA_175.d	(01/09/17 00:00:00)	Sa_ATB-M1-j3-exp1-plasma_BA_175	baplasma1	62	Sa_ATB-M1-j3-exp1-plasma_GCMRM_175.D	(01/12/17 00:00:00)	Sa_ATB-M1-j3-exp1-plasma_175	gcplasma1	13
HIRAE-j7-exp1-plasma_213	Sa_HIRAE-M3-j7-exp1-plasma_SF_213.d	(03/13/17 00:00:00)	Sa_HIRAE-M3-j7-exp1-plasma_SF_213	sfplasma1	98	Sa_HIRAE-M3-j7-exp1-plasma_PA_213.d	(03/22/17 00:00:00)	Sa_HIRAE-M3-j7-exp1-plasma_PA_213	paplasma1	99	Sa_HIRAE-M3-j7-exp1-plasma_BA_213.d	(01/09/17 00:00:00)	Sa_HIRAE-M3-j7-exp1-plasma_BA_213	baplasma1	38	Sa_HIRAE-M3-j7-exp1-plasma_GCMRM_213.D	(01/12/17 00:00:00)	Sa_HIRAE-M3-j7-exp1-plasma_213	gcplasma1	22
Nacl-j7-exp1-plasma_203	Sa_Nacl-M5-j7-exp1-plasma_SF_203.d	(03/13/17 00:00:00)	Sa_Nacl-M5-j7-exp1-plasma_SF_203	sfplasma1	100	Sa_Nacl-M5-j7-exp1-plasma_PA_203.d	(03/22/17 00:00:00)	Sa_Nacl-M5-j7-exp1-plasma_PA_203	paplasma1	101	Sa_Nacl-M5-j7-exp1-plasma_BA_203.d	(01/09/17 00:00:00)	Sa_Nacl-M5-j7-exp1-plasma_BA_203	baplasma1	32	Sa_Nacl-M5-j7-exp1-plasma_GCMRM_203.D	(01/12/17 00:00:00)	Sa_Nacl-M5-j7-exp1-plasma_203	gcplasma1	24
Nacl-j3-exp1-plasma_169	Sa_Nacl-M1-j3-exp1-plasma_SF_169.d	(03/13/17 00:00:00)	Sa_Nacl-M1-j3-exp1-plasma_SF_169	sfplasma1	103	Sa_Nacl-M1-j3-exp1-plasma_PA_169.d	(03/22/17 00:00:00)	Sa_Nacl-M1-j3-exp1-plasma_PA_169	paplasma1	104	Sa_Nacl-M1-j3-exp1-plasma_BA_169.d	(01/09/17 00:00:00)	Sa_Nacl-M1-j3-exp1-plasma_BA_169	baplasma1	25	Sa_Nacl-M1-j3-exp1-plasma_GCMRM_169.D	(01/12/17 00:00:00)	Sa_Nacl-M1-j3-exp1-plasma_169	gcplasma1	27
FRAGILIS-j7-exp1-plasma_221	Sa_FRAGILIS-M5-j7-exp1-plasma_SF_221.d	(03/13/17 00:00:00)	Sa_FRAGILIS-M5-j7-exp1-plasma_SF_221	sfplasma1	84	Sa_FRAGILIS-M5-j7-exp1-plasma_PA_221.d	(03/22/17 00:00:00)	Sa_FRAGILIS-M5-j7-exp1-plasma_PA_221	paplasma1	85	Sa_FRAGILIS-M5-j7-exp1-plasma_BA_221.d	(01/12/17 00:00:00)	Sa_FRAGILIS-M5-j7-exp1-plasma_BA_221	baplasma1	83	Sa_FRAGILIS-M5-j7-exp1-plasma_GCMRM_221.D	(01/12/17 00:00:00)	Sa_FRAGILIS-M5-j7-exp1-plasma_221	gcplasma1	8
ATB-j7-exp1-plasma_209	Sa_ATB-M5-j7-exp1-plasma_SF_209.d	(03/13/17 00:00:00)	Sa_ATB-M5-j7-exp1-plasma_SF_209	sfplasma1	91	Sa_ATB-M5-j7-exp1-plasma_PA_209.d	(03/22/17 00:00:00)	Sa_ATB-M5-j7-exp1-plasma_PA_209	paplasma1	92	-	(NA NA)	-	-	-	Sa_ATB-M5-j7-exp1-plasma_GCMRM_209.D	(01/12/17 00:00:00)	Sa_ATB-M5-j7-exp1-plasma_209	gcplasma1	15
BARNECIELA-j3-exp1-plasma_193	Sa_BARNECIELA-M1-j3-exp1-plasma_SF_193.d	(03/13/17 00:00:00)	Sa_BARNECIELA-M1-j3-exp1-plasma_SF_193	sfplasma1	93	Sa_BARNECIELA-M1-j3-exp1-plasma_PA_193.d	(03/22/17 00:00:00)	Sa_BARNECIELA-M1-j3-exp1-plasma_PA_193	paplasma1	94	Sa_BARNECIELA-M1-j3-exp1-plasma_BA_193.d	(01/09/17 00:00:00)	Sa_BARNECIELA-M1-j3-exp1-plasma_BA_193	baplasma1	60	Sa_BARNECIELA-M1-j3-exp1-plasma_GCMRM_193.D	(01/12/17 00:00:00)	Sa_BARNECIELA-M1-j3-exp1-plasma_193	gcplasma1	17
FRAGILIS-j7-exp1-plasma_217	Sa_FRAGILIS-M1-j7-exp1-plasma_SF_217.d	(03/13/17 00:00:00)	Sa_FRAGILIS-M1-j7-exp1-plasma_SF_217	sfplasma1	87	Sa_FRAGILIS-M1-j7-exp1-plasma_PA_217.d	(03/22/17 00:00:00)	Sa_FRAGILIS-M1-j7-exp1-plasma_PA_217	paplasma1	88	Sa_FRAGILIS-M1-j7-exp1-plasma_BA_217.d	(01/12/17 00:00:00)	Sa_FRAGILIS-M1-j7-exp1-plasma_BA_217	baplasma1	87	Sa_FRAGILIS-M1-j7-exp1-plasma_GCMRM_217b.D	(01/12/17 00:00:00)	Sa_FRAGILIS-M1-j7-exp1-plasma_217b	gcplasma1	11
ATB-j3-exp1-plasma_177	Sa_ATB-M3-j3-exp1-plasma_SF_177.d	(03/13/17 00:00:00)	Sa_ATB-M3-j3-exp1-plasma_SF_177	sfplasma1	113	Sa_ATB-M3-j3-exp1-plasma_PA_177.d	(03/22/17 00:00:00)	Sa_ATB-M3-j3-exp1-plasma_PA_177	paplasma1	114	Sa_ATB-M3-j3-exp1-plasma_BA_177.d	(01/09/17 00:00:00)	Sa_ATB-M3-j3-exp1-plasma_BA_177	baplasma1	18	Sa_ATB-M3-j3-exp1-plasma_GCMRM_177.D	(01/12/17 00:00:00)	Sa_ATB-M3-j3-exp1-plasma_177	gcplasma1	37
FRAGILIS-j3-exp1-plasma_190	Sa_FRAGILIS-M4-j3-exp1-plasma_SF_190.d	(03/13/17 00:00:00)	Sa_FRAGILIS-M4-j3-exp1-plasma_SF_190	sfplasma1	108	Sa_FRAGILIS-M4-j3-exp1-plasma_PA_190.d	(03/22/17 00:00:00)	Sa_FRAGILIS-M4-j3-exp1-plasma_PA_190	paplasma1	109	Sa_FRAGILIS-M4-j3-exp1-plasma_BA_190.d	(01/09/17 00:00:00)	Sa_FRAGILIS-M4-j3-exp1-plasma_BA_190	baplasma1	35	Sa_FRAGILIS-M4-j3-exp1-plasma_GCMRM_190.D	(01/12/17 00:00:00)	Sa_FRAGILIS-M4-j3-exp1-plasma_190	gcplasma1	32
FRAGILIS-j14-exp1-plasma_241	Sa_FRAGILIS-M1-j14-exp1-plasma_SF_241.d	(03/13/17 00:00:00)	Sa_FRAGILIS-M1-j14-exp1-plasma_SF_241	sfplasma1	116	Sa_FRAGILIS-M1-j14-exp1-plasma_PA_241.d	(03/22/17 00:00:00)	Sa_FRAGILIS-M1-j14-exp1-plasma_PA_241	paplasma1	117	Sa_FRAGILIS-M1-j14-exp1-plasma_BA_241bis.d	(01/09/17 00:00:00)	Sa_FRAGILIS-M1-j14-exp1-plasma_BA_241bis	baplasma1	17	Sa_FRAGILIS-M1-j14-exp1-plasma_GCMRM_241.D	(01/12/17 00:00:00)	Sa_FRAGILIS-M1-j14-exp1-plasma_241	gcplasma1	40
Nacl-j3-exp1-plasma_171	Sa_Nacl-M3-j3-exp1-plasma_SF_171.d	(03/13/17 00:00:00)	Sa_Nacl-M3-j3-exp1-plasma_SF_171	sfplasma1	110	Sa_Nacl-M3-j3-exp1-plasma_PA_171.d	(03/22/17 00:00:00)	Sa_Nacl-M3-j3-exp1-plasma_PA_171	paplasma1	111	Sa_Nacl-M3-j3-exp1-plasma_BA_171.d	(01/09/17 00:00:00)	Sa_Nacl-M3-j3-exp1-plasma_BA_171	baplasma1	36	Sa_Nacl-M3-j3-exp1-plasma_GCMRM_171.D	(01/12/17 00:00:00)	Sa_Nacl-M3-j3-exp1-plasma_171	gcplasma1	34
BARNECIELA-j7-exp1-plasma_225	Sa_BARNECIELA-M3-j7-exp1-plasma_SF_225.d	(03/13/17 00:00:00)	Sa_BARNECIELA-M3-j7-exp1-plasma_SF_225	sfplasma1	97	Sa_BARNECIELA-M3-j7-exp1-plasma_PA_225.d	(03/22/17 00:00:00)	Sa_BARNECIELA-M3-j7-exp1-plasma_PA_225	paplasma1	98	Sa_BARNECIELA-M3-j7-exp1-plasma_BA_225bis.d	(01/09/17 00:00:00)	Sa_BARNECIELA-M3-j7-exp1-plasma_BA_225bis	baplasma1	76	Sa_BARNECIELA-M3-j7-exp1-plasma_GCMRM_225.D	(01/12/17 00:00:00)	Sa_BARNECIELA-M3-j7-exp1-plasma_225	gcplasma1	21
HIRAE-j3-exp1-plasma_183	Sa_HIRAE-M3-j3-exp1-plasma_SF_183.d	(03/13/17 00:00:00)	Sa_HIRAE-M3-j3-exp1-plasma_SF_183	sfplasma1	104	Sa_HIRAE-M3-j3-exp1-plasma_PA_183.d	(03/22/17 00:00:00)	Sa_HIRAE-M3-j3-exp1-plasma_PA_183	paplasma1	105	Sa_HIRAE-M3-j3-exp1-plasma_BA_183.d	(01/09/17 00:00:00)	Sa_HIRAE-M3-j3-exp1-plasma_BA_183	baplasma1	55	Sa_HIRAE-M3-j3-exp1-plasma_GCMRM_183.D	(01/12/17 00:00:00)	Sa_HIRAE-M3-j3-exp1-plasma_183	gcplasma1	28
ATB-j14-exp1-plasma_233	Sa_ATB-M5-j14-exp1-plasma_SF_233.d	(03/13/17 00:00:00)	Sa_ATB-M5-j14-exp1-plasma_SF_233	sfplasma1	111	Sa_ATB-M5-j14-exp1-plasma_PA_233.d	(03/22/17 00:00:00)	Sa_ATB-M5-j14-exp1-plasma_PA_233	paplasma1	112	Sa_ATB-M5-j14-exp1-plasma_BA_233bis.d	(01/09/17 00:00:00)	Sa_ATB-M5-j14-exp1-plasma_BA_233bis	baplasma1	34	Sa_ATB-M5-j14-exp1-plasma_GCMRM_233.D	(01/12/17 00:00:00)	Sa_ATB-M5-j14-exp1-plasma_233	gcplasma1	35
HIRAE-j7-exp1-plasma_211	Sa_HIRAE-M1-j7-exp1-plasma_SF_211.d	(03/13/17 00:00:00)	Sa_HIRAE-M1-j7-exp1-plasma_SF_211	sfplasma1	114	Sa_HIRAE-M1-j7-exp1-plasma_PA_211.d	(03/22/17 00:00:00)	Sa_HIRAE-M1-j7-exp1-plasma_PA_211	paplasma1	115	Sa_HIRAE-M1-j7-exp1-plasma_BA_211.d	(01/09/17 00:00:00)	Sa_HIRAE-M1-j7-exp1-plasma_BA_211	baplasma1	28	Sa_HIRAE-M1-j7-exp1-plasma_GCMRM_211.D	(01/12/17 00:00:00)	Sa_HIRAE-M1-j7-exp1-plasma_211	gcplasma1	38
FRAGILIS-j14-exp1-plasma_246	Sa_FRAGILIS-M6-j14-exp1-plasma_SF_246.d	(03/13/17 00:00:00)	Sa_FRAGILIS-M6-j14-exp1-plasma_SF_246	sfplasma1	117	Sa_FRAGILIS-M6-j14-exp1-plasma_PA_246.d	(03/22/17 00:00:00)	Sa_FRAGILIS-M6-j14-exp1-plasma_PA_246	paplasma1	118	Sa_FRAGILIS-M6-j14-exp1-plasma_BA_246bis.d	(01/09/17 00:00:00)	Sa_FRAGILIS-M6-j14-exp1-plasma_BA_246bis	baplasma1	22	Sa_FRAGILIS-M6-j14-exp1-plasma_GCMRM_246.D	(01/12/17 00:00:00)	Sa_FRAGILIS-M6-j14-exp1-plasma_246	gcplasma1	41
FRAGILIS-j14-exp1-plasma_243	Sa_FRAGILIS-M3-j14-exp1-plasma_SF_243.d	(03/13/17 00:00:00)	Sa_FRAGILIS-M3-j14-exp1-plasma_SF_243	sfplasma1	99	Sa_FRAGILIS-M3-j14-exp1-plasma_PA_243.d	(03/22/17 00:00:00)	Sa_FRAGILIS-M3-j14-exp1-plasma_PA_243	paplasma1	100	Sa_FRAGILIS-M3-j14-exp1-plasma_BA_243.d	(01/09/17 00:00:00)	Sa_FRAGILIS-M3-j14-exp1-plasma_BA_243	baplasma1	77	Sa_FRAGILIS-M3-j14-exp1-plasma_GCMRM_243.D	(01/12/17 00:00:00)	Sa_FRAGILIS-M3-j14-exp1-plasma_243	gcplasma1	23
ATB-j7-exp1-plasma_205	Sa_ATB-M1-j7-exp1-plasma_SF_205.d	(03/13/17 00:00:00)	Sa_ATB-M1-j7-exp1-plasma_SF_205	sfplasma1	123	Sa_ATB-M1-j7-exp1-plasma_PA_205.d	(03/22/17 00:00:00)	Sa_ATB-M1-j7-exp1-plasma_PA_205	paplasma1	124	Sa_ATB-M1-j7-exp1-plasma_BA_205bis.d	(01/09/17 00:00:00)	Sa_ATB-M1-j7-exp1-plasma_BA_205bis	baplasma1	6	Sa_ATB-M1-j7-exp1-plasma_GCMRM_205.D	(01/12/17 00:00:00)	Sa_ATB-M1-j7-exp1-plasma_205	gcplasma1	46
Nacl-j7-exp1-plasma_201	Sa_Nacl-M3-j7-exp1-plasma_SF_201.d	(03/13/17 00:00:00)	Sa_Nacl-M3-j7-exp1-plasma_SF_201	sfplasma1	112	Sa_Nacl-M3-j7-exp1-plasma_PA_201.d	(03/22/17 00:00:00)	Sa_Nacl-M3-j7-exp1-plasma_PA_201	paplasma1	113	Sa_Nacl-M3-j7-exp1-plasma_BA_201.d	(01/09/17 00:00:00)	Sa_Nacl-M3-j7-exp1-plasma_BA_201	baplasma1	46	Sa_Nacl-M3-j7-exp1-plasma_GCMRM_201.D	(01/12/17 00:00:00)	Sa_Nacl-M3-j7-exp1-plasma_201	gcplasma1	36
FRAGILIS-j3-exp1-plasma_191	Sa_FRAGILIS-M5-j3-exp1-plasma_SF_191.d	(03/13/17 00:00:00)	Sa_FRAGILIS-M5-j3-exp1-plasma_SF_191	sfplasma1	121	Sa_FRAGILIS-M5-j3-exp1-plasma_PA_191.d	(03/22/17 00:00:00)	Sa_FRAGILIS-M5-j3-exp1-plasma_PA_191	paplasma1	122	Sa_FRAGILIS-M5-j3-exp1-plasma_BA_191.d	(01/09/17 00:00:00)	Sa_FRAGILIS-M5-j3-exp1-plasma_BA_191	baplasma1	21	Sa_FRAGILIS-M5-j3-exp1-plasma_GCMRM_191.D	(01/12/17 00:00:00)	Sa_FRAGILIS-M5-j3-exp1-plasma_191	gcplasma1	44
HIRAE-j7-exp1-plasma_215	Sa_HIRAE-M5-j7-exp1-plasma_SF_215.d	(03/13/17 00:00:00)	Sa_HIRAE-M5-j7-exp1-plasma_SF_215	sfplasma1	101	Sa_HIRAE-M5-j7-exp1-plasma_PA_215.d	(03/22/17 00:00:00)	Sa_HIRAE-M5-j7-exp1-plasma_PA_215	paplasma1	102	Sa_HIRAE-M5-j7-exp1-plasma_BA_215.d	(01/12/17 00:00:00)	Sa_HIRAE-M5-j7-exp1-plasma_BA_215	baplasma1	86	Sa_HIRAE-M5-j7-exp1-plasma_GCMRM_215.D	(01/12/17 00:00:00)	Sa_HIRAE-M5-j7-exp1-plasma_215	gcplasma1	25
BARNECIELA-j7-exp1-plasma_223	Sa_ARNECIELA-M1-j7-exp1-plasma_SF_223.d	(03/13/17 00:00:00)	Sa_ARNECIELA-M1-j7-exp1-plasma_SF_223	sfplasma1	127	Sa_BARNECIELA-M1-j7-exp1-plasma_PA_223.d	(03/22/17 00:00:00)	Sa_BARNECIELA-M1-j7-exp1-plasma_PA_223	paplasma1	128	Sa_BARNECIELA-M1-j7-exp1-plasma_BA_223bis.d	(01/09/17 00:00:00)	Sa_BARNECIELA-M1-j7-exp1-plasma_BA_223bis	baplasma1	12	Sa_ARNECIELA-M1-j7-exp1-plasma_GCMRM_223.D	(01/12/17 00:00:00)	Sa_ARNECIELA-M1-j7-exp1-plasma_223	gcplasma1	50
Nacl-j7-exp1-plasma_202	Sa_Nacl-M4-j7-exp1-plasma_SF_202.d	(03/13/17 00:00:00)	Sa_Nacl-M4-j7-exp1-plasma_SF_202	sfplasma1	129	Sa_Nacl-M4-j7-exp1-plasma_PA_202.d	(03/22/17 00:00:00)	Sa_Nacl-M4-j7-exp1-plasma_PA_202	paplasma1	130	Sa_Nacl-M4-j7-exp1-plasma_BA_202.d	(01/09/17 00:00:00)	Sa_Nacl-M4-j7-exp1-plasma_BA_202	baplasma1	11	Sa_Nacl-M4-j7-exp1-plasma_GCMRM_202.D	(01/12/17 00:00:00)	Sa_Nacl-M4-j7-exp1-plasma_202	gcplasma1	52
FRAGILIS-j14-exp1-plasma_244	Sa_FRAGILIS-M4-j14-exp1-plasma_SF_244.d	(03/13/17 00:00:00)	Sa_FRAGILIS-M4-j14-exp1-plasma_SF_244	sfplasma1	106	Sa_FRAGILIS-M4-j14-exp1-plasma_PA_244.d	(03/22/17 00:00:00)	Sa_FRAGILIS-M4-j14-exp1-plasma_PA_244	paplasma1	107	Sa_FRAGILIS-M4-j14-exp1-plasma_BA_244bis.d	(01/12/17 00:00:00)	Sa_FRAGILIS-M4-j14-exp1-plasma_BA_244bis	baplasma1	84	Sa_FRAGILIS-M4-j14-exp1-plasma_GCMRM_244.D	(01/12/17 00:00:00)	Sa_FRAGILIS-M4-j14-exp1-plasma_244	gcplasma1	30
Nacl-j3-exp1-plasma_172	Sa_Nacl-M4-j3-exp1-plasma_SF_172.d	(03/13/17 00:00:00)	Sa_Nacl-M4-j3-exp1-plasma_SF_172	sfplasma1	130	Sa_Nacl-M4-j3-exp1-plasma_PA_172.d	(03/22/17 00:00:00)	Sa_Nacl-M4-j3-exp1-plasma_PA_172	paplasma1	131	Sa_Nacl-M4-j3-exp1-plasma_BA_172.d	(01/09/17 00:00:00)	Sa_Nacl-M4-j3-exp1-plasma_BA_172	baplasma1	13	Sa_Nacl-M4-j3-exp1-plasma_GCMRM_172.D	(01/12/17 00:00:00)	Sa_Nacl-M4-j3-exp1-plasma_172	gcplasma1	53
Nacl-j3-exp1-plasma_173	Sa_Nacl-M5-j3-exp1-plasma_SF_173.d	(03/13/17 00:00:00)	Sa_Nacl-M5-j3-exp1-plasma_SF_173	sfplasma1	115	Sa_Nacl-M5-j3-exp1-plasma_PA_173.d	(03/22/17 00:00:00)	Sa_Nacl-M5-j3-exp1-plasma_PA_173	paplasma1	116	Sa_Nacl-M5-j3-exp1-plasma_BA_173.d	(01/09/17 00:00:00)	Sa_Nacl-M5-j3-exp1-plasma_BA_173	baplasma1	61	Sa_Nacl-M5-j3-exp1-plasma_GCMRM_173.D	(01/12/17 00:00:00)	Sa_Nacl-M5-j3-exp1-plasma_173	gcplasma1	39
HIRAE-j14-exp1-plasma_240	Sa_HIRAE-M6-j14-exp1-plasma_SF_240.d	(03/13/17 00:00:00)	Sa_HIRAE-M6-j14-exp1-plasma_SF_240	sfplasma1	122	Sa_HIRAE-M6-j14-exp1-plasma_PA_240.d	(03/22/17 00:00:00)	Sa_HIRAE-M6-j14-exp1-plasma_PA_240	paplasma1	123	Sa_HIRAE-M6-j14-exp1-plasma_BA_240bis.d	(01/09/17 00:00:00)	Sa_HIRAE-M6-j14-exp1-plasma_BA_240bis	baplasma1	42	Sa_HIRAE-M6-j14-exp1-plasma_GCMRM_240.D	(01/12/17 00:00:00)	Sa_HIRAE-M6-j14-exp1-plasma_240	gcplasma1	45
HIRAE-j3-exp1-plasma_184	Sa_HIRAE-M4-j3-exp1-plasma_SF_184.d	(03/13/17 00:00:00)	Sa_HIRAE-M4-j3-exp1-plasma_SF_184	sfplasma1	134	Sa_HIRAE-M4-j3-exp1-plasma_PA_184.d	(03/22/17 00:00:00)	Sa_HIRAE-M4-j3-exp1-plasma_PA_184	paplasma1	135	Sa_HIRAE-M4-j3-exp1-plasma_BA_184.d	(01/09/17 00:00:00)	Sa_HIRAE-M4-j3-exp1-plasma_BA_184	baplasma1	8	Sa_HIRAE-M4-j3-exp1-plasma_GCMRM_184.D	(01/12/17 00:00:00)	Sa_HIRAE-M4-j3-exp1-plasma_184	gcplasma1	57
FRAGILIS-j7-exp1-plasma_222	Sa_FRAGILIS-M6-j7-exp1-plasma_SF_222.d	(03/13/17 00:00:00)	Sa_FRAGILIS-M6-j7-exp1-plasma_SF_222	sfplasma1	107	Sa_FRAGILIS-M6-j7-exp1-plasma_PA_222.d	(03/22/17 00:00:00)	Sa_FRAGILIS-M6-j7-exp1-plasma_PA_222	paplasma1	108	Sa_FRAGILIS-M6-j7-exp1-plasma_BA_222.d	(01/12/17 00:00:00)	Sa_FRAGILIS-M6-j7-exp1-plasma_BA_222	baplasma1	89	Sa_FRAGILIS-M6-j7-exp1-plasma_GCMRM_222.D	(01/12/17 00:00:00)	Sa_FRAGILIS-M6-j7-exp1-plasma_222	gcplasma1	31
Nacl-j3-exp1-plasma_170	Sa_Nacl-M2-j3-exp1-plasma_SF_170.d	(03/13/17 00:00:00)	Sa_Nacl-M2-j3-exp1-plasma_SF_170	sfplasma1	120	Sa_Nacl-M2-j3-exp1-plasma_PA_170.d	(03/22/17 00:00:00)	Sa_Nacl-M2-j3-exp1-plasma_PA_170	paplasma1	121	Sa_Nacl-M2-j3-exp1-plasma_BA_170.d	(01/09/17 00:00:00)	Sa_Nacl-M2-j3-exp1-plasma_BA_170	baplasma1	51	Sa_Nacl-M2-j3-exp1-plasma_GCMRM_170.D	(01/12/17 00:00:00)	Sa_Nacl-M2-j3-exp1-plasma_170	gcplasma1	43
BARNECIELA-j7-exp1-plasma_226	Sa_BARNECIELA-M4-j7-exp1-plasma_SF_226.d	(03/13/17 00:00:00)	Sa_BARNECIELA-M4-j7-exp1-plasma_SF_226	sfplasma1	109	Sa_BARNECIELA-M4-j7-exp1-plasma_PA_226.d	(03/22/17 00:00:00)	Sa_BARNECIELA-M4-j7-exp1-plasma_PA_226	paplasma1	110	-	(NA NA)	-	-	-	Sa_BARNECIELA-M4-j7-exp1-plasma_GCMRM_226.D	(01/12/17 00:00:00)	Sa_BARNECIELA-M4-j7-exp1-plasma_226	gcplasma1	33
FRAGILIS-j3-exp1-plasma_187	Sa_FRAGILIS-M1-j3-exp1-plasma_SF_187.d	(03/13/17 00:00:00)	Sa_FRAGILIS-M1-j3-exp1-plasma_SF_187	sfplasma1	124	Sa_FRAGILIS-M1-j3-exp1-plasma_PA_187.d	(03/22/17 00:00:00)	Sa_FRAGILIS-M1-j3-exp1-plasma_PA_187	paplasma1	125	Sa_FRAGILIS-M1-j3-exp1-plasma_BA_187.d	(01/09/17 00:00:00)	Sa_FRAGILIS-M1-j3-exp1-plasma_BA_187	baplasma1	47	Sa_FRAGILIS-M1-j3-exp1-plasma_GCMRM_187.D	(01/12/17 00:00:00)	Sa_FRAGILIS-M1-j3-exp1-plasma_187	gcplasma1	47
BARNECIELA-j14-exp1-plasma_248	Sa_BARNECIELA-M2-j14-exp1-plasma_SF_248.d	(03/13/17 00:00:00)	Sa_BARNECIELA-M2-j14-exp1-plasma_SF_248	sfplasma1	138	Sa_BARNECIELA-M2-j14-exp1-plasma_PA_248.d	(03/22/17 00:00:00)	Sa_BARNECIELA-M2-j14-exp1-plasma_PA_248	paplasma1	139	Sa_BARNECIELA-M2-j14-exp1-plasma_BA_248bis.d	(01/09/17 00:00:00)	Sa_BARNECIELA-M2-j14-exp1-plasma_BA_248bis	baplasma1	7	Sa_BARNECIELA-M2-j14-exp1-plasma_GCMRM_248.D	(01/12/17 00:00:00)	Sa_BARNECIELA-M2-j14-exp1-plasma_248	gcplasma1	61
BARNECIELA-j3-exp1-plasma_196	Sa_BARNECIELA-M4-j3-exp1-plasma_SF_196.d	(03/13/17 00:00:00)	Sa_BARNECIELA-M4-j3-exp1-plasma_SF_196	sfplasma1	128	Sa_BARNECIELA-M4-j3-exp1-plasma_PA_196.d	(03/22/17 00:00:00)	Sa_BARNECIELA-M4-j3-exp1-plasma_PA_196	paplasma1	129	Sa_BARNECIELA-M4-j3-exp1-plasma_BA_196.d	(01/09/17 00:00:00)	Sa_BARNECIELA-M4-j3-exp1-plasma_BA_196	baplasma1	48	Sa_BARNECIELA-M4-j3-exp1-plasma_GCMRM_196.D	(01/12/17 00:00:00)	Sa_BARNECIELA-M4-j3-exp1-plasma_196	gcplasma1	51
ATB-j7-exp1-plasma_206	Sa_ATB-M2-j7-exp1-plasma_SF_206.d	(03/13/17 00:00:00)	Sa_ATB-M2-j7-exp1-plasma_SF_206	sfplasma1	126	Sa_ATB-M2-j7-exp1-plasma_PA_206.d	(03/22/17 00:00:00)	Sa_ATB-M2-j7-exp1-plasma_PA_206	paplasma1	127	Sa_ATB-M2-j7-exp1-plasma_BA_206.d	(01/09/17 00:00:00)	Sa_ATB-M2-j7-exp1-plasma_BA_206	baplasma1	57	Sa_ATB-M2-j7-exp1-plasma_GCMRM_206.D	(01/12/17 00:00:00)	Sa_ATB-M2-j7-exp1-plasma_206	gcplasma1	49
BARNECIELA-j3-exp1-plasma_197	Sa_BARNECIELA-M5-j3-exp1-plasma_SF_197.d	(03/13/17 00:00:00)	Sa_BARNECIELA-M5-j3-exp1-plasma_SF_197	sfplasma1	135	Sa_BARNECIELA-M5-j3-exp1-plasma_PA_197.d	(03/22/17 00:00:00)	Sa_BARNECIELA-M5-j3-exp1-plasma_PA_197	paplasma1	136	Sa_BARNECIELA-M5-j3-exp1-plasma_BA_197.d	(01/09/17 00:00:00)	Sa_BARNECIELA-M5-j3-exp1-plasma_BA_197	baplasma1	30	Sa_BARNECIELA-M5-j3-exp1-plasma_GCMRM_197.D	(01/12/17 00:00:00)	Sa_BARNECIELA-M5-j3-exp1-plasma_197	gcplasma1	58
ATB-j14-exp1-plasma_231	Sa_ATB-M3-j14-exp1-plasma_SF_231.d	(03/13/17 00:00:00)	Sa_ATB-M3-j14-exp1-plasma_SF_231	sfplasma1	125	Sa_ATB-M3-j14-exp1-plasma_PA_231.d	(03/22/17 00:00:00)	Sa_ATB-M3-j14-exp1-plasma_PA_231	paplasma1	126	Sa_ATB-M3-j14-exp1-plasma_BA_231bis.d	(01/09/17 00:00:00)	Sa_ATB-M3-j14-exp1-plasma_BA_231bis	baplasma1	67	Sa_ATB-M3-j14-exp1-plasma_GCMRM_231.D	(01/12/17 00:00:00)	Sa_ATB-M3-j14-exp1-plasma_231	gcplasma1	48
HIRAE-j3-exp1-plasma_182	Sa_HIRAE-M2-j3-exp1-plasma_SF_182.d	(03/16/17 00:00:00)	Sa_HIRAE-M2-j3-exp1-plasma_SF_182	sfplasma1	142	Sa_HIRAE-M2-j3-exp1-plasma_PA_182.d	(03/22/17 00:00:00)	Sa_HIRAE-M2-j3-exp1-plasma_PA_182	paplasma1	143	Sa_HIRAE-M2-j3-exp1-plasma_BA_182.d	(01/09/17 00:00:00)	Sa_HIRAE-M2-j3-exp1-plasma_BA_182	baplasma1	20	Sa_HIRAE-M2-j3-exp1-plasma_GCMRM_182.D	(01/12/17 00:00:00)	Sa_HIRAE-M2-j3-exp1-plasma_182	gcplasma1	65
BARNECIELA-j7-exp1-plasma_227	Sa_BARNECIELA-M5-j7-exp1-plasma_SF_227.d	(03/13/17 00:00:00)	Sa_BARNECIELA-M5-j7-exp1-plasma_SF_227	sfplasma1	132	Sa_BARNECIELA-M5-j7-exp1-plasma_PA_227.d	(03/22/17 00:00:00)	Sa_BARNECIELA-M5-j7-exp1-plasma_PA_227	paplasma1	133	Sa_BARNECIELA-M5-j7-exp1-plasma_BA_227bis.d	(01/09/17 00:00:00)	Sa_BARNECIELA-M5-j7-exp1-plasma_BA_227bis	baplasma1	59	Sa_BARNECIELA-M5-j7-exp1-plasma_GCMRM_227.D	(01/12/17 00:00:00)	Sa_BARNECIELA-M5-j7-exp1-plasma_227	gcplasma1	55
Nacl-j3-exp2-plasma_134	Sa_Nacl-M2-j3-exp2-plasma_SF_134.d	(03/10/17 00:00:00)	Sa_Nacl-M2-j3-exp2-plasma_SF_134	sfplasma2	4	Sa_Nacl-M2-j3-exp2-plasma_PA_134.d	(03/25/17 00:00:00)	Sa_Nacl-M2-j3-exp2-plasma_PA_134	paplasma2	176	Sa_Nacl-M2-j3-exp2-Plasma_BA_134.d	(01/12/17 00:00:00)	Sa_Nacl-M2-j3-exp2-Plasma_BA_134	baplasma2	100	Sa_Nacl-M2-j3-exp2-Plasma_GCMRM_134.D	(01/18/17 00:00:00)	Sa_Nacl-M2-j3-exp2-Plasma_134	gcplasma2	100
ATB-j3-exp2-plasma_142	Sa_ATB-M4-j3-exp2-plasma_SF_142.d	(03/10/17 00:00:00)	Sa_ATB-M4-j3-exp2-plasma_SF_142	sfplasma2	5	Sa_ATB-M4-j3-exp2-plasma_PA_142.d	(03/25/17 00:00:00)	Sa_ATB-M4-j3-exp2-plasma_PA_142	paplasma2	177	Sa_ATB-M4-j3-exp2-Plasma_BA_142.d	(01/12/17 00:00:00)	Sa_ATB-M4-j3-exp2-Plasma_BA_142	baplasma2	101	Sa_ATB-M4-j3-exp2-Plasma_GCMRM_142.D	(01/18/17 00:00:00)	Sa_ATB-M4-j3-exp2-Plasma_142	gcplasma2	101
MITSUAKI-j3-exp2-plasma_154	Sa_MITSUAKI-M4-j3-exp2-plasma_SF_154.d	(03/10/17 00:00:00)	Sa_MITSUAKI-M4-j3-exp2-plasma_SF_154	sfplasma2	6	Sa_MITSUAKI-M4-j3-exp2-plasma_PA_154.d	(03/25/17 00:00:00)	Sa_MITSUAKI-M4-j3-exp2-plasma_PA_154	paplasma2	178	Sa_MITSUAKI-M4-j3-exp2-Plasma_BA_154.d	(01/12/17 00:00:00)	Sa_MITSUAKI-M4-j3-exp2-Plasma_BA_154	baplasma2	102	Sa_MITSUAKI-M4-j3-exp2-Plasma_GCMRM_154.D	(01/18/17 00:00:00)	Sa_MITSUAKI-M4-j3-exp2-Plasma_154	gcplasma2	102
ATB-j3-exp1-plasma_178	Sa_ATB-M4-j3-exp1-plasma_SF_178.d	(03/16/17 00:00:00)	Sa_ATB-M4-j3-exp1-plasma_SF_178	sfplasma1	141	Sa_ATB-M4-j3-exp1-plasma_PA_178.d	(03/22/17 00:00:00)	Sa_ATB-M4-j3-exp1-plasma_PA_178	paplasma1	142	Sa_ATB-M4-j3-exp1-plasma_BA_178.d	(01/09/17 00:00:00)	Sa_ATB-M4-j3-exp1-plasma_BA_178	baplasma1	45	Sa_ATB-M4-j3-exp1-plasma_GCMRM_178.D	(01/12/17 00:00:00)	Sa_ATB-M4-j3-exp1-plasma_178	gcplasma1	64
ATB-j7-exp2-plasma_166	Sa_ATB-M4-j7-exp2-plasma_SF_166.d	(03/10/17 00:00:00)	Sa_ATB-M4-j7-exp2-plasma_SF_166	sfplasma2	7	Sa_ATB-M4-j7-exp2-plasma_PA_166.d	(03/25/17 00:00:00)	Sa_ATB-M4-j7-exp2-plasma_PA_166	paplasma2	179	Sa_ATB-M4-j7-exp2-Plasma_BA_166.d	(01/12/17 00:00:00)	Sa_ATB-M4-j7-exp2-Plasma_BA_166	baplasma2	103	Sa_ATB-M4-j7-exp2-Plasma_GCMRM_166.D	(01/18/17 00:00:00)	Sa_ATB-M4-j7-exp2-Plasma_166	gcplasma2	103
BARNECIELA-j14-exp1-plasma_251	Sa_BARNECIELA-M5-j14-exp1-plasma_SF_251.d	(03/13/17 00:00:00)	Sa_BARNECIELA-M5-j14-exp1-plasma_SF_251	sfplasma1	139	Sa_BARNECIELA-M5-j14-exp1-plasma_PA_251.d	(03/22/17 00:00:00)	Sa_BARNECIELA-M5-j14-exp1-plasma_PA_251	paplasma1	140	Sa_BARNECIELA-M5-j14-exp1-plasma_BA_251bis.d	(01/09/17 00:00:00)	Sa_BARNECIELA-M5-j14-exp1-plasma_BA_251bis	baplasma1	53	Sa_BARNECIELA-M5-j14-exp1-plasma_GCMRM_251.D	(01/12/17 00:00:00)	Sa_BARNECIELA-M5-j14-exp1-plasma_251	gcplasma1	62
HIRAE-j14-exp1-plasma_236	Sa_HIRAE-M2-j14-exp1-plasma_SF_236.d	(03/16/17 00:00:00)	Sa_HIRAE-M2-j14-exp1-plasma_SF_236	sfplasma1	148	Sa_HIRAE-M2-j14-exp1-plasma_PA_236.d	(03/22/17 00:00:00)	Sa_HIRAE-M2-j14-exp1-plasma_PA_236	paplasma1	149	Sa_HIRAE-M2-j14-exp1-plasma_BA_236bis.d	(01/09/17 00:00:00)	Sa_HIRAE-M2-j14-exp1-plasma_BA_236bis	baplasma1	26	Sa_HIRAE-M2-j14-exp1-plasma_GCMRM_236.D	(01/12/17 00:00:00)	Sa_HIRAE-M2-j14-exp1-plasma_236	gcplasma1	71
ATB-j7-exp1-plasma_208	Sa_ATB-M4-j7-exp1-plasma_SF_208.d	(03/16/17 00:00:00)	Sa_ATB-M4-j7-exp1-plasma_SF_208	sfplasma1	145	Sa_ATB-M4-j7-exp1-plasma_PA_208.d	(03/22/17 00:00:00)	Sa_ATB-M4-j7-exp1-plasma_PA_208	paplasma1	146	Sa_ATB-M4-j7-exp1-plasma_BA_208.d	(01/09/17 00:00:00)	Sa_ATB-M4-j7-exp1-plasma_BA_208	baplasma1	37	Sa_ATB-M4-j7-exp1-plasma_GCMRM_208.D	(01/12/17 00:00:00)	Sa_ATB-M4-j7-exp1-plasma_208	gcplasma1	68
MITSUAKI-j7-exp2-plasma_178	Sa_MITSUAKI-M4-j7-exp2-plasma_SF_178.d	(03/10/17 00:00:00)	Sa_MITSUAKI-M4-j7-exp2-plasma_SF_178	sfplasma2	8	Sa_MITSUAKI-M4-j7-exp2-plasma_PA_178.d	(03/25/17 00:00:00)	Sa_MITSUAKI-M4-j7-exp2-plasma_PA_178	paplasma2	180	Sa_MITSUAKI-M4-j7-exp2-Plasma_BA_178.d	(01/12/17 00:00:00)	Sa_MITSUAKI-M4-j7-exp2-Plasma_BA_178	baplasma2	104	Sa_MITSUAKI-M4-j7-exp2-Plasma_GCMRM_178.D	(01/18/17 00:00:00)	Sa_MITSUAKI-M4-j7-exp2-Plasma_178	gcplasma2	104
BURKO-j3-exp2-plasma_148	Sa_BURKO-M4-j3-exp2-plasma_SF_148.d	(03/10/17 00:00:00)	Sa_BURKO-M4-j3-exp2-plasma_SF_148	sfplasma2	9	Sa_BURKO-M4-j3-exp2-plasma_PA_148.d	(03/25/17 00:00:00)	Sa_BURKO-M4-j3-exp2-plasma_PA_148	paplasma2	181	Sa_BURKO-M4-j3-exp2-Plasma_BA_148.d	(01/12/17 00:00:00)	Sa_BURKO-M4-j3-exp2-Plasma_BA_148	baplasma2	105	Sa_BURKO-M4-j3-exp2-Plasma_GCMRM_148.D	(01/18/17 00:00:00)	Sa_BURKO-M4-j3-exp2-Plasma_148	gcplasma2	105
FRAGILIS-j14-exp1-plasma_245	Sa_FRAGILIS-M5-j14-exp1-plasma_SF_245.d	(03/16/17 00:00:00)	Sa_FRAGILIS-M5-j14-exp1-plasma_SF_245	sfplasma1	143	Sa_FRAGILIS-M5-j14-exp1-plasma_PA_245.d	(03/22/17 00:00:00)	Sa_FRAGILIS-M5-j14-exp1-plasma_PA_245	paplasma1	144	Sa_FRAGILIS-M5-j14-exp1-plasma_BA_245bis.d	(01/09/17 00:00:00)	Sa_FRAGILIS-M5-j14-exp1-plasma_BA_245bis	baplasma1	50	Sa_FRAGILIS-M5-j14-exp1-plasma_GCMRM_245.D	(01/12/17 00:00:00)	Sa_FRAGILIS-M5-j14-exp1-plasma_245	gcplasma1	66
ATB-j14-exp1-plasma_229	Sa_ATB-M1-j14-exp1-plasma_SF_229.d	(03/16/17 00:00:00)	Sa_ATB-M1-j14-exp1-plasma_SF_229	sfplasma1	146	Sa_ATB-M1-j14-exp1-plasma_PA_229.d	(03/22/17 00:00:00)	Sa_ATB-M1-j14-exp1-plasma_PA_229	paplasma1	147	Sa_ATB-M1-j14-exp1-plasma_BA_229bis.d	(01/09/17 00:00:00)	Sa_ATB-M1-j14-exp1-plasma_BA_229bis	baplasma1	41	Sa_ATB-M1-j14-exp1-plasma_GCMRM_229.D	(01/12/17 00:00:00)	Sa_ATB-M1-j14-exp1-plasma_229	gcplasma1	69
ATB-j14-exp1-plasma_234	Sa_ATB-M6-j14-exp1-plasma_SF_234.d	(03/16/17 00:00:00)	Sa_ATB-M6-j14-exp1-plasma_SF_234	sfplasma1	155	Sa_ATB-M6-j14-exp1-plasma_PA_234.d	(03/22/17 00:00:00)	Sa_ATB-M6-j14-exp1-plasma_PA_234	paplasma1	156	Sa_ATB-M6-j14-exp1-plasma_Ba_234.d	(01/09/17 00:00:00)	Sa_ATB-M6-j14-exp1-plasma_Ba_234	baplasma1	14	Sa_ATB-M6-j14-exp1-plasma_GCMRM_234.D	(01/12/17 00:00:00)	Sa_ATB-M6-j14-exp1-plasma_234	gcplasma1	78
ATB-j14-exp2-plasma_185	Sa_ATB-M5-j14-exp2-plasma_SF_185.d	(03/10/17 00:00:00)	Sa_ATB-M5-j14-exp2-plasma_SF_185	sfplasma2	10	Sa_ATB-M5-j14-exp2-plasma_PA_185.d	(03/25/17 00:00:00)	Sa_ATB-M5-j14-exp2-plasma_PA_185	paplasma2	182	Sa_ATB-M5-j14-exp2-Plasma_BA_185.d	(01/12/17 00:00:00)	Sa_ATB-M5-j14-exp2-Plasma_BA_185	baplasma2	106	Sa_ATB-M5-j14-exp2-Plasma_GCMRM_185.D	(01/18/17 00:00:00)	Sa_ATB-M5-j14-exp2-Plasma_185	gcplasma2	106
HIRAE-j7-exp1-plasma_214	Sa_HIRAE-M4-j7-exp1-plasma_SF_214.d	(03/13/17 00:00:00)	Sa_HIRAE-M4-j7-exp1-plasma_SF_214	sfplasma1	133	Sa_HIRAE-M4-j7-exp1-plasma_PA_214.d	(03/22/17 00:00:00)	Sa_HIRAE-M4-j7-exp1-plasma_PA_214	paplasma1	134	Sa_HIRAE-M4-j7-exp1-plasma_BA_214.d	(01/12/17 00:00:00)	Sa_HIRAE-M4-j7-exp1-plasma_BA_214	baplasma1	85	Sa_HIRAE-M4-j7-exp1-plasma_GCMRM_214.D	(01/12/17 00:00:00)	Sa_HIRAE-M4-j7-exp1-plasma_214	gcplasma1	56
Nacl-j7-exp2-plasma_161	Sa_Nacl-M5-j7-exp2-plasma_SF_161.d	(03/10/17 00:00:00)	Sa_Nacl-M5-j7-exp2-plasma_SF_161	sfplasma2	11	Sa_Nacl-M5-j7-exp2-plasma_PA_161.d	(03/25/17 00:00:00)	Sa_Nacl-M5-j7-exp2-plasma_PA_161	paplasma2	183	Sa_Nacl-M5-j7-exp2-Plasma_BA_161.d	(01/12/17 00:00:00)	Sa_Nacl-M5-j7-exp2-Plasma_BA_161	baplasma2	107	Sa_Nacl-M5-j7-exp2-Plasma_GCMRM_161.D	(01/18/17 00:00:00)	Sa_Nacl-M5-j7-exp2-Plasma_161	gcplasma2	107
FRAGILIS-j7-exp1-plasma_219	Sa_FRAGILIS-M3-j7-exp1-plasma_SF_219.d	(03/13/17 00:00:00)	Sa_FRAGILIS-M3-j7-exp1-plasma_SF_219	sfplasma1	119	Sa_FRAGILIS-M3-j7-exp1-plasma_PA_219.d	(03/22/17 00:00:00)	Sa_FRAGILIS-M3-j7-exp1-plasma_PA_219	paplasma1	120	Sa_FRAGILIS-M3-j7-exp1-plasma_BA_219.d	(01/09/17 00:00:00)	Sa_FRAGILIS-M3-j7-exp1-plasma_BA_219	baplasma1	79	Sa_FRAGILIS-M3-j7-exp1-plasma_GCMRM_219b.D	(01/12/17 00:00:00)	Sa_FRAGILIS-M3-j7-exp1-plasma_219b	gcplasma1	92
HIRAE-j14-exp1-plasma_237	Sa_HIRAE-M3-j14-exp1-plasma_SF_237.d	(03/13/17 00:00:00)	Sa_HIRAE-M3-j14-exp1-plasma_SF_237	sfplasma1	137	Sa_HIRAE-M3-j14-exp1-plasma_PA_237.d	(03/22/17 00:00:00)	Sa_HIRAE-M3-j14-exp1-plasma_PA_237	paplasma1	138	Sa_HIRAE-M3-j14-exp1-plasma_BA_237.d	(01/09/17 00:00:00)	Sa_HIRAE-M3-j14-exp1-plasma_BA_237	baplasma1	80	Sa_HIRAE-M3-j14-exp1-plasma_GCMRM_237.D	(01/12/17 00:00:00)	Sa_HIRAE-M3-j14-exp1-plasma_237	gcplasma1	60
MITSUAKI-j14-exp2-plasma_197	Sa_MITSUAKI-M5-j14-exp2-plasma_SF_197.d	(03/10/17 00:00:00)	Sa_MITSUAKI-M5-j14-exp2-plasma_SF_197	sfplasma2	12	Sa_MITSUAKI-M5-j14-exp2-plasma_PA_197.d	(03/25/17 00:00:00)	Sa_MITSUAKI-M5-j14-exp2-plasma_PA_197	paplasma2	185	Sa_MITSUAKI-M5-j14-exp2-Plasma_BA_197.d	(01/12/17 00:00:00)	Sa_MITSUAKI-M5-j14-exp2-Plasma_BA_197	baplasma2	109	Sa_MITSUAKI-M5-j14-exp2-Plasma_GCMRM_197.D	(01/18/17 00:00:00)	Sa_MITSUAKI-M5-j14-exp2-Plasma_197	gcplasma2	109
BURKO-j7-exp2-plasma_172	Sa_BURKO-M4-j7-exp2-plasma_SF_172.d	(03/10/17 00:00:00)	Sa_BURKO-M4-j7-exp2-plasma_SF_172	sfplasma2	13	Sa_BURKO-M4-j7-exp2-plasma_PA_172.d	(03/25/17 00:00:00)	Sa_BURKO-M4-j7-exp2-plasma_PA_172	paplasma2	186	Sa_BURKO-M4-j7-exp2-Plasma_BA_172.d	(01/12/17 00:00:00)	Sa_BURKO-M4-j7-exp2-Plasma_BA_172	baplasma2	110	Sa_BURKO-M4-j7-exp2-Plasma_GCMRM_172.D	(01/18/17 00:00:00)	Sa_BURKO-M4-j7-exp2-Plasma_172	gcplasma2	110
FRAGILIS-j7-exp1-plasma_218	Sa_FRAGILIS-M2-j7-exp1-plasma_SF_218.d	(03/13/17 00:00:00)	Sa_FRAGILIS-M2-j7-exp1-plasma_SF_218	sfplasma1	140	Sa_FRAGILIS-M2-j7-exp1-plasma_PA_218.d	(03/22/17 00:00:00)	Sa_FRAGILIS-M2-j7-exp1-plasma_PA_218	paplasma1	141	Sa_FRAGILIS-M2-j7-exp1-plasma_BA_218.d	(01/09/17 00:00:00)	Sa_FRAGILIS-M2-j7-exp1-plasma_BA_218	baplasma1	81	Sa_FRAGILIS-M2-j7-exp1-plasma_GCMRM_218.D	(01/12/17 00:00:00)	Sa_FRAGILIS-M2-j7-exp1-plasma_218	gcplasma1	63
ATB-j3-exp1-plasma_176	Sa_ATB-M2-j3-exp1-plasma_SF_176.d	(03/16/17 00:00:00)	Sa_ATB-M2-j3-exp1-plasma_SF_176	sfplasma1	149	Sa_ATB-M2-j3-exp1-plasma_PA_176.d	(03/22/17 00:00:00)	Sa_ATB-M2-j3-exp1-plasma_PA_176	paplasma1	150	Sa_ATB-M2-j3-exp1-plasma_BA_176.d	(01/09/17 00:00:00)	Sa_ATB-M2-j3-exp1-plasma_BA_176	baplasma1	54	Sa_ATB-M2-j3-exp1-plasma_GCMRM_176.D	(01/12/17 00:00:00)	Sa_ATB-M2-j3-exp1-plasma_176	gcplasma1	72
BARNECIELA-j7-exp1-plasma_228	Sa_BARNECIELA-M6-j7-exp1-plasma_SF_228.d	(03/16/17 00:00:00)	Sa_BARNECIELA-M6-j7-exp1-plasma_SF_228	sfplasma1	164	Sa_BARNECIELA-M6-j7-exp1-plasma_PA_228.d	(03/22/17 00:00:00)	Sa_BARNECIELA-M6-j7-exp1-plasma_PA_228	paplasma1	165	Sa_BARNECIELA-M6-j7-exp1-plasma_BA_228.d	(01/09/17 00:00:00)	Sa_BARNECIELA-M6-j7-exp1-plasma_BA_228	baplasma1	10	Sa_BARNECIELA-M6-j7-exp1-plasma_GCMRM_228.D	(01/12/17 00:00:00)	Sa_BARNECIELA-M6-j7-exp1-plasma_228	gcplasma1	87
BURKO-j3-exp2-plasma_147	Sa_BURKO-M3-j3-exp2-plasma_SF_147.d	(03/10/17 00:00:00)	Sa_BURKO-M3-j3-exp2-plasma_SF_147	sfplasma2	15	Sa_BURKO-M3-j3-exp2-plasma_PA_147.d	(03/25/17 00:00:00)	Sa_BURKO-M3-j3-exp2-plasma_PA_147	paplasma2	188	Sa_BURKO-M3-j3-exp2-Plasma_BA_147.d	(01/12/17 00:00:00)	Sa_BURKO-M3-j3-exp2-Plasma_BA_147	baplasma2	112	Sa_BURKO-M3-j3-exp2-Plasma_GCMRM_147.D	(01/18/17 00:00:00)	Sa_BURKO-M3-j3-exp2-Plasma_147	gcplasma2	112
Nacl-j3-exp2-plasma_137	Sa_Nacl-M5-j3-exp2-plasma_SF_137.d	(03/10/17 00:00:00)	Sa_Nacl-M5-j3-exp2-plasma_SF_137	sfplasma2	16	Sa_Nacl-M5-j3-exp2-plasma_PA_137.d	(03/25/17 00:00:00)	Sa_Nacl-M5-j3-exp2-plasma_PA_137	paplasma2	189	Sa_Nacl-M5-j3-exp2-Plasma_BA_137.d	(01/12/17 00:00:00)	Sa_Nacl-M5-j3-exp2-Plasma_BA_137	baplasma2	113	Sa_Nacl-M5-j3-exp2-Plasma_GCMRM_137.D	(01/18/17 00:00:00)	Sa_Nacl-M5-j3-exp2-Plasma_137	gcplasma2	113
ATB-j3-exp2-plasma_141	Sa_ATB-M3-j3-exp2-plasma_SF_141.d	(03/10/17 00:00:00)	Sa_ATB-M3-j3-exp2-plasma_SF_141	sfplasma2	17	Sa_ATB-M3-j3-exp2-plasma_PA_141.d	(03/25/17 00:00:00)	Sa_ATB-M3-j3-exp2-plasma_PA_141	paplasma2	190	Sa_ATB-M3-j3-exp2-Plasma_BA_141.d	(01/12/17 00:00:00)	Sa_ATB-M3-j3-exp2-Plasma_BA_141	baplasma2	114	Sa_ATB-M3-j3-exp2-Plasma_GCMRM_141.D	(01/18/17 00:00:00)	Sa_ATB-M3-j3-exp2-Plasma_141	gcplasma2	114
HIRAE-j7-exp1-plasma_212	Sa_HIRAE-M2-j7-exp1-plasma_SF_212.d	(03/16/17 00:00:00)	Sa_HIRAE-M2-j7-exp1-plasma_SF_212	sfplasma1	150	Sa_HIRAE-M2-j7-exp1-plasma_PA_212.d	(03/22/17 00:00:00)	Sa_HIRAE-M2-j7-exp1-plasma_PA_212	paplasma1	151	Sa_HIRAE-M2-j7-exp1-plasma_BA_212.d	(01/09/17 00:00:00)	Sa_HIRAE-M2-j7-exp1-plasma_BA_212	baplasma1	63	Sa_HIRAE-M2-j7-exp1-plasma_GCMRM_212.D	(01/12/17 00:00:00)	Sa_HIRAE-M2-j7-exp1-plasma_212	gcplasma1	73
BARNECIELA-j7-exp1-plasma_224	Sa_BARNECIELA-M2-j7-exp1-plasma_SF_224.d	(03/16/17 00:00:00)	Sa_BARNECIELA-M2-j7-exp1-plasma_SF_224	sfplasma1	152	Sa_BARNECIELA-M2-j7-exp1-plasma_PA_224.d	(03/22/17 00:00:00)	Sa_BARNECIELA-M2-j7-exp1-plasma_PA_224	paplasma1	153	Sa_BARNECIELA-M2-j7-exp1-plasma_BA_224bis.d	(01/09/17 00:00:00)	Sa_BARNECIELA-M2-j7-exp1-plasma_BA_224bis	baplasma1	58	Sa_BARNECIELA-M2-j7-exp1-plasma_GCMRM_224.D	(01/12/17 00:00:00)	Sa_BARNECIELA-M2-j7-exp1-plasma_224	gcplasma1	75
Nacl-j7-exp1-plasma_200	Sa_Nacl-M2-j7-exp1-plasma_SF_200.d	(03/16/17 00:00:00)	Sa_Nacl-M2-j7-exp1-plasma_SF_200	sfplasma1	165	Sa_Nacl-M2-j7-exp1-plasma_PA_200.d	(03/22/17 00:00:00)	Sa_Nacl-M2-j7-exp1-plasma_PA_200	paplasma1	166	Sa_Nacl-M2-j7-exp1-plasma_BA_200.d	(01/09/17 00:00:00)	Sa_Nacl-M2-j7-exp1-plasma_BA_200	baplasma1	19	Sa_Nacl-M2-j7-exp1-plasma_GCMRM_200.D	(01/12/17 00:00:00)	Sa_Nacl-M2-j7-exp1-plasma_200	gcplasma1	88
MITSUAKI-j3-exp2-plasma_153	Sa_MITSUAKI-M3-j3-exp2-plasma_SF_153.d	(03/10/17 00:00:00)	Sa_MITSUAKI-M3-j3-exp2-plasma_SF_153	sfplasma2	18	Sa_MITSUAKI-M3-j3-exp2-plasma_PA_153.d	(03/25/17 00:00:00)	Sa_MITSUAKI-M3-j3-exp2-plasma_PA_153	paplasma2	191	Sa_MITSUAKI-M3-j3-exp2-Plasma_BA_153.d	(01/12/17 00:00:00)	Sa_MITSUAKI-M3-j3-exp2-Plasma_BA_153	baplasma2	115	Sa_MITSUAKI-M3-j3-exp2-Plasma_GCMRM_153.D	(01/18/17 00:00:00)	Sa_MITSUAKI-M3-j3-exp2-Plasma_153	gcplasma2	115
FRAGILIS-j3-exp1-plasma_188	Sa_FRAGILIS-M2-j3-exp1-plasma_SF_188.d	(03/16/17 00:00:00)	Sa_FRAGILIS-M2-j3-exp1-plasma_SF_188	sfplasma1	151	Sa_FRAGILIS-M2-j3-exp1-plasma_PA_188.d	(03/22/17 00:00:00)	Sa_FRAGILIS-M2-j3-exp1-plasma_PA_188	paplasma1	152	Sa_FRAGILIS-M2-j3-exp1-plasma_BA_188.d	(01/09/17 00:00:00)	Sa_FRAGILIS-M2-j3-exp1-plasma_BA_188	baplasma1	65	Sa_FRAGILIS-M2-j3-exp1-plasma_GCMRM_188.D	(01/12/17 00:00:00)	Sa_FRAGILIS-M2-j3-exp1-plasma_188	gcplasma1	74
HIRAE-j3-exp1-plasma_181	Sa_HIRAE-M1-j3-exp1-plasma_SF_181.d	(03/13/17 00:00:00)	Sa_HIRAE-M1-j3-exp1-plasma_SF_181	sfplasma1	136	Sa_HIRAE-M1-j3-exp1-plasma_PA_181.d	(03/22/17 00:00:00)	Sa_HIRAE-M1-j3-exp1-plasma_PA_181	paplasma1	137	-	(NA NA)	-	-	-	Sa_HIRAE-M1-j3-exp1-plasma_GCMRM_181.D	(01/12/17 00:00:00)	Sa_HIRAE-M1-j3-exp1-plasma_181	gcplasma1	59
BURKO-j7-exp2-plasma_171	Sa_BURKO-M3-j7-exp2-plasma_SF_171.d	(03/10/17 00:00:00)	Sa_BURKO-M3-j7-exp2-plasma_SF_171	sfplasma2	19	Sa_BURKO-M3-j7-exp2-plasma_PA_171.d	(03/25/17 00:00:00)	Sa_BURKO-M3-j7-exp2-plasma_PA_171	paplasma2	192	Sa_BURKO-M3-j7-exp2-Plasma_BA_171.d	(01/12/17 00:00:00)	Sa_BURKO-M3-j7-exp2-Plasma_BA_171	baplasma2	116	Sa_BURKO-M3-j7-exp2-Plasma_GCMRM_171.D	(01/18/17 00:00:00)	Sa_BURKO-M3-j7-exp2-Plasma_171	gcplasma2	116
ATB-j7-exp2-plasma_165	Sa_ATB-M3-j7-exp2-plasma_SF_165.d	(03/10/17 00:00:00)	Sa_ATB-M3-j7-exp2-plasma_SF_165	sfplasma2	20	Sa_ATB-M3-j7-exp2-plasma_PA_165.d	(03/25/17 00:00:00)	Sa_ATB-M3-j7-exp2-plasma_PA_165	paplasma2	193	Sa_ATB-M3-j7-exp2-Plasma_BA_165.d	(01/12/17 00:00:00)	Sa_ATB-M3-j7-exp2-Plasma_BA_165	baplasma2	117	Sa_ATB-M3-j7-exp2-Plasma_GCMRM_165.D	(01/18/17 00:00:00)	Sa_ATB-M3-j7-exp2-Plasma_165	gcplasma2	117
BARNECIELA-j3-exp1-plasma_194	Sa_BARNECIELA-M2-j3-exp1-plasma_SF_194.d	(03/16/17 00:00:00)	Sa_BARNECIELA-M2-j3-exp1-plasma_SF_194	sfplasma1	162	Sa_BARNECIELA-M2-j3-exp1-plasma_PA_194.d	(03/22/17 00:00:00)	Sa_BARNECIELA-M2-j3-exp1-plasma_PA_194	paplasma1	163	Sa_BARNECIELA-M2-j3-exp1-plasma_BA_194.d	(01/09/17 00:00:00)	Sa_BARNECIELA-M2-j3-exp1-plasma_BA_194	baplasma1	40	Sa_BARNECIELA-M2-j3-exp1-plasma_GCMRM_194.D	(01/12/17 00:00:00)	Sa_BARNECIELA-M2-j3-exp1-plasma_194	gcplasma1	85
MITSUAKI-j14-exp2-plasma_196	Sa_MITSUAKI-M4-j14-exp2-plasma_SF_196.d	(03/10/17 00:00:00)	Sa_MITSUAKI-M4-j14-exp2-plasma_SF_196	sfplasma2	21	Sa_MITSUAKI-M4-j14-exp2-plasma_PA_196.d	(03/25/17 00:00:00)	Sa_MITSUAKI-M4-j14-exp2-plasma_PA_196	paplasma2	194	Sa_MITSUAKI-M4-j14-exp2-Plasma_BA_196.d	(01/12/17 00:00:00)	Sa_MITSUAKI-M4-j14-exp2-Plasma_BA_196	baplasma2	118	Sa_MITSUAKI-M4-j14-exp2-Plasma_GCMRM_196.D	(01/18/17 00:00:00)	Sa_MITSUAKI-M4-j14-exp2-Plasma_196	gcplasma2	118
BURKO-j14-exp2-plasma_190	Sa_BURKO-M4-j14-exp2-plasma_SF_190.d	(03/10/17 00:00:00)	Sa_BURKO-M4-j14-exp2-plasma_SF_190	sfplasma2	22	Sa_BURKO-M4-j14-exp2-plasma_PA_190.d	(03/25/17 00:00:00)	Sa_BURKO-M4-j14-exp2-plasma_PA_190	paplasma2	195	Sa_BURKO-M4-j14-exp2-Plasma_BA_190.d	(01/12/17 00:00:00)	Sa_BURKO-M4-j14-exp2-Plasma_BA_190	baplasma2	119	Sa_BURKO-M4-j14-exp2-Plasma_GCMRM_190.D	(01/18/17 00:00:00)	Sa_BURKO-M4-j14-exp2-Plasma_190	gcplasma2	119
FRAGILIS-j14-exp1-plasma_242	Sa_FRAGILIS-M2-j14-exp1-plasma_SF_242.d	(03/16/17 00:00:00)	Sa_FRAGILIS-M2-j14-exp1-plasma_SF_242	sfplasma1	161	Sa_FRAGILIS-M2-j14-exp1-plasma_PA_242.d	(03/22/17 00:00:00)	Sa_FRAGILIS-M2-j14-exp1-plasma_PA_242	paplasma1	162	Sa_FRAGILIS-M2-j14-exp1-plasma_BA_242bis.d	(01/09/17 00:00:00)	Sa_FRAGILIS-M2-j14-exp1-plasma_BA_242bis	baplasma1	49	Sa_FRAGILIS-M2-j14-exp1-plasma_GCMRM_242.D	(01/12/17 00:00:00)	Sa_FRAGILIS-M2-j14-exp1-plasma_242	gcplasma1	84
Nacl-j7-exp1-plasma_204	Sa_Nacl-M6-j7-exp1-plasma_SF_204.d	(03/16/17 00:00:00)	Sa_Nacl-M6-j7-exp1-plasma_SF_204	sfplasma1	153	Sa_Nacl-M6-j7-exp1-plasma_PA_204.d	(03/22/17 00:00:00)	Sa_Nacl-M6-j7-exp1-plasma_PA_204	paplasma1	154	Sa_Nacl-M6-j7-exp1-plasma_BA_204.d	(01/09/17 00:00:00)	Sa_Nacl-M6-j7-exp1-plasma_BA_204	baplasma1	74	Sa_Nacl-M6-j7-exp1-plasma_GCMRM_204.D	(01/12/17 00:00:00)	Sa_Nacl-M6-j7-exp1-plasma_204	gcplasma1	76
ATB-j14-exp2-plasma_184	Sa_ATB-M4-j14-exp2-plasma_SF_184.d	(03/10/17 00:00:00)	Sa_ATB-M4-j14-exp2-plasma_SF_184	sfplasma2	23	Sa_ATB-M4-j14-exp2-plasma_PA_184.d	(03/25/17 00:00:00)	Sa_ATB-M4-j14-exp2-plasma_PA_184	paplasma2	196	Sa_ATB-M4-j14-exp2-Plasma_BA_184.d	(01/12/17 00:00:00)	Sa_ATB-M4-j14-exp2-Plasma_BA_184	baplasma2	120	Sa_ATB-M4-j14-exp2-Plasma_GCMRM_184.D	(01/18/17 00:00:00)	Sa_ATB-M4-j14-exp2-Plasma_184	gcplasma2	120
BARNECIELA-j14-exp1-plasma_249	Sa_BARNECIELA-M3-j14-exp1-plasma_SF_249.d	(03/16/17 00:00:00)	Sa_BARNECIELA-M3-j14-exp1-plasma_SF_249	sfplasma1	157	Sa_BARNECIELA-M3-j14-exp1-plasma_PA_249.d	(03/22/17 00:00:00)	Sa_BARNECIELA-M3-j14-exp1-plasma_PA_249	paplasma1	158	Sa_BARNECIELA-M3-j14-exp1-plasma_BA_249bis.d	(01/09/17 00:00:00)	Sa_BARNECIELA-M3-j14-exp1-plasma_BA_249bis	baplasma1	68	Sa_BARNECIELA-M3-j14-exp1-plasma_GCMRM_249.D	(01/12/17 00:00:00)	Sa_BARNECIELA-M3-j14-exp1-plasma_249	gcplasma1	80
Nacl-j7-exp2-plasma_159	Sa_Nacl-M3-j7-exp2-plasma_SF_159.d	(03/10/17 00:00:00)	Sa_Nacl-M3-j7-exp2-plasma_SF_159	sfplasma2	24	Sa_Nacl-M3-j7-exp2-plasma_PA_159.d	(03/25/17 00:00:00)	Sa_Nacl-M3-j7-exp2-plasma_PA_159	paplasma2	197	Sa_Nacl-M3-j7-exp2-Plasma_BA_159.d	(01/12/17 00:00:00)	Sa_Nacl-M3-j7-exp2-Plasma_BA_159	baplasma2	121	Sa_Nacl-M3-j7-exp2-Plasma_GCMRM_159.D	(01/18/17 00:00:00)	Sa_Nacl-M3-j7-exp2-Plasma_159	gcplasma2	121
FRAGILIS-j3-exp1-plasma_192	Sa_FRAGILIS-M6-j3-exp1-plasma_SF_192.d	(03/16/17 00:00:00)	Sa_FRAGILIS-M6-j3-exp1-plasma_SF_192	sfplasma1	154	Sa_FRAGILIS-M6-j3-exp1-plasma_PA_192.d	(03/22/17 00:00:00)	Sa_FRAGILIS-M6-j3-exp1-plasma_PA_192	paplasma1	155	Sa_FRAGILIS-M6-j3-exp1-plasma_BA_192.d	(01/09/17 00:00:00)	Sa_FRAGILIS-M6-j3-exp1-plasma_BA_192	baplasma1	78	Sa_FRAGILIS-M6-j3-exp1-plasma_GCMRM_192.D	(01/12/17 00:00:00)	Sa_FRAGILIS-M6-j3-exp1-plasma_192	gcplasma1	77
ATB-j3-exp2-plasma_140	Sa_ATB-M2-j3-exp2-plasma_SF_140.d	(03/10/17 00:00:00)	Sa_ATB-M2-j3-exp2-plasma_SF_140	sfplasma2	26	Sa_ATB-M2-j3-exp2-plasma_PA_140.d	(03/25/17 00:00:00)	Sa_ATB-M2-j3-exp2-plasma_PA_140	paplasma2	199	Sa_ATB-M2-j3-exp2-Plasma_BA_140.d	(01/12/17 00:00:00)	Sa_ATB-M2-j3-exp2-Plasma_BA_140	baplasma2	123	Sa_ATB-M2-j3-exp2-Plasma_GCMRM_140.D	(01/18/17 00:00:00)	Sa_ATB-M2-j3-exp2-Plasma_140	gcplasma2	123
BURKO-j14-exp2-plasma_191	Sa_BURKO-M5-j14-exp2-plasma_SF_191b.d	(03/10/17 00:00:00)	Sa_BURKO-M5-j14-exp2-plasma_SF_191b	sfplasma2	72	Sa_BURKO-M5-j14-exp2-plasma_PA_191.d	(03/25/17 00:00:00)	Sa_BURKO-M5-j14-exp2-plasma_PA_191	paplasma2	184	Sa_BURKO-M5-j14-exp2-Plasma_BA_191.d	(01/12/17 00:00:00)	Sa_BURKO-M5-j14-exp2-Plasma_BA_191	baplasma2	108	Sa_BURKO-M5-j14-exp2-Plasma_GCMRM_191.D	(01/18/17 00:00:00)	Sa_BURKO-M5-j14-exp2-Plasma_191	gcplasma2	108
BURKO-j14-exp2-plasma_189	Sa_BURKO-M3-j14-exp2-plasma_SF_189.d	(03/10/17 00:00:00)	Sa_BURKO-M3-j14-exp2-plasma_SF_189	sfplasma2	27	Sa_BURKO-M3-j14-exp2-plasma_PA_189.d	(03/25/17 00:00:00)	Sa_BURKO-M3-j14-exp2-plasma_PA_189	paplasma2	200	Sa_BURKO-M3-j14-exp2-Plasma_BA_189.d	(01/12/17 00:00:00)	Sa_BURKO-M3-j14-exp2-Plasma_BA_189	baplasma2	124	Sa_BURKO-M3-j14-exp2-Plasma_GCMRM_189.D	(01/18/17 00:00:00)	Sa_BURKO-M3-j14-exp2-Plasma_189	gcplasma2	124
HIRAE-j3-exp1-plasma_186	Sa_HIRAE-M6-j3-exp1-plasma_SF_186.d	(03/16/17 00:00:00)	Sa_HIRAE-M6-j3-exp1-plasma_SF_186	sfplasma1	160	Sa_HIRAE-M6-j3-exp1-plasma_PA_186.d	(03/22/17 00:00:00)	Sa_HIRAE-M6-j3-exp1-plasma_PA_186	paplasma1	161	Sa_HIRAE-M6-j3-exp1-plasma_BA_186.d	(01/09/17 00:00:00)	Sa_HIRAE-M6-j3-exp1-plasma_BA_186	baplasma1	72	Sa_HIRAE-M6-j3-exp1-plasma_GCMRM_186.D	(01/12/17 00:00:00)	Sa_HIRAE-M6-j3-exp1-plasma_186	gcplasma1	83
Nacl-j3-exp2-plasma_135	Sa_Nacl-M3-j3-exp2-plasma_SF_135.d	(03/10/17 00:00:00)	Sa_Nacl-M3-j3-exp2-plasma_SF_135	sfplasma2	28	Sa_Nacl-M3-j3-exp2-plasma_PA_135.d	(03/25/17 00:00:00)	Sa_Nacl-M3-j3-exp2-plasma_PA_135	paplasma2	201	Sa_Nacl-M3-j3-exp2-Plasma_BA_135.d	(01/12/17 00:00:00)	Sa_Nacl-M3-j3-exp2-Plasma_BA_135	baplasma2	125	Sa_Nacl-M3-j3-exp2-Plasma_GCMRM_135.D	(01/18/17 00:00:00)	Sa_Nacl-M3-j3-exp2-Plasma_135	gcplasma2	125
HIRAE-j7-exp1-plasma_216	Sa_HIRAE-M6-j7-exp1-plasma_SF_216.d	(03/16/17 00:00:00)	Sa_HIRAE-M6-j7-exp1-plasma_SF_216	sfplasma1	159	Sa_HIRAE-M6-j7-exp1-plasma_PA_216.d	(03/22/17 00:00:00)	Sa_HIRAE-M6-j7-exp1-plasma_PA_216	paplasma1	160	Sa_HIRAE-M6-j7-exp1-plasma_BA_216.d	(01/09/17 00:00:00)	Sa_HIRAE-M6-j7-exp1-plasma_BA_216	baplasma1	82	Sa_HIRAE-M6-j7-exp1-plasma_GCMRM_216.D	(01/12/17 00:00:00)	Sa_HIRAE-M6-j7-exp1-plasma_216	gcplasma1	82
MITSUAKI-j3-exp2-plasma_156	Sa_MITSUAKI-M6-j3-exp2-plasma_SF_156.d	(03/10/17 00:00:00)	Sa_MITSUAKI-M6-j3-exp2-plasma_SF_156	sfplasma2	29	Sa_MITSUAKI-M6-j3-exp2-plasma_PA_156.d	(03/25/17 00:00:00)	Sa_MITSUAKI-M6-j3-exp2-plasma_PA_156	paplasma2	202	Sa_MITSUAKI-M6-j3-exp2-Plasma_BA_156.d	(01/12/17 00:00:00)	Sa_MITSUAKI-M6-j3-exp2-Plasma_BA_156	baplasma2	126	Sa_MITSUAKI-M6-j3-exp2-Plasma_GCMRM_156.D	(01/18/17 00:00:00)	Sa_MITSUAKI-M6-j3-exp2-Plasma_156	gcplasma2	126
Nacl-j3-exp1-plasma_174	Sa_Nacl-M6-j3-exp1-plasma_SF_174.d	(03/16/17 00:00:00)	Sa_Nacl-M6-j3-exp1-plasma_SF_174	sfplasma1	147	Sa_Nacl-M6-j3-exp1-plasma_PA_174.d	(03/22/17 00:00:00)	Sa_Nacl-M6-j3-exp1-plasma_PA_174	paplasma1	148	-	(NA NA)	-	-	-	Sa_Nacl-M6-j3-exp1-plasma_GCMRM_174.D	(01/12/17 00:00:00)	Sa_Nacl-M6-j3-exp1-plasma_174	gcplasma1	70
ATB-j3-exp2-plasma_144	Sa_ATB-M6-j3-exp2-plasma_SF_144.d	(03/10/17 00:00:00)	Sa_ATB-M6-j3-exp2-plasma_SF_144	sfplasma2	30	Sa_ATB-M6-j3-exp2-plasma_PA_144.d	(03/25/17 00:00:00)	Sa_ATB-M6-j3-exp2-plasma_PA_144	paplasma2	203	Sa_ATB-M6-j3-exp2-Plasma_BA_144.d	(01/12/17 00:00:00)	Sa_ATB-M6-j3-exp2-Plasma_BA_144	baplasma2	127	Sa_ATB-M6-j3-exp2-Plasma_GCMRM_144.D	(01/18/17 00:00:00)	Sa_ATB-M6-j3-exp2-Plasma_144	gcplasma2	127
BURKO-j3-exp2-plasma_150	Sa_BURKO-M6-j3-exp2-plasma_SF_150.d	(03/10/17 00:00:00)	Sa_BURKO-M6-j3-exp2-plasma_SF_150	sfplasma2	31	Sa_BURKO-M6-j3-exp2-plasma_PA_150.d	(03/25/17 00:00:00)	Sa_BURKO-M6-j3-exp2-plasma_PA_150	paplasma2	204	Sa_BURKO-M6-j3-exp2-Plasma_BA_150.d	(01/12/17 00:00:00)	Sa_BURKO-M6-j3-exp2-Plasma_BA_150	baplasma2	128	Sa_BURKO-M6-j3-exp2-Plasma_GCMRM_150.D	(01/18/17 00:00:00)	Sa_BURKO-M6-j3-exp2-Plasma_150	gcplasma2	128
BARNECIELA-j14-exp1-plasma_250	Sa_BARNECIELA-M4-j14-exp1-plasma_SF_250.d	(03/16/17 00:00:00)	Sa_BARNECIELA-M4-j14-exp1-plasma_SF_250	sfplasma1	166	Sa_BARNECIELA-M4-j14-exp1-plasma_PA_250.d	(03/22/17 00:00:00)	Sa_BARNECIELA-M4-j14-exp1-plasma_PA_250	paplasma1	167	Sa_BARNECIELA-M4-j14-exp1-plasma_BA_250bis.d	(01/09/17 00:00:00)	Sa_BARNECIELA-M4-j14-exp1-plasma_BA_250bis	baplasma1	70	Sa_BARNECIELA-M4-j14-exp1-plasma_GCMRM_250.D	(01/12/17 00:00:00)	Sa_BARNECIELA-M4-j14-exp1-plasma_250	gcplasma1	89
MITSUAKI-j7-exp2-plasma_177	Sa_MITSUAKI-M3-j7-exp2-plasma_SF_177.d	(03/10/17 00:00:00)	Sa_MITSUAKI-M3-j7-exp2-plasma_SF_177	sfplasma2	32	Sa_MITSUAKI-M3-j7-exp2-plasma_PA_177.d	(03/25/17 00:00:00)	Sa_MITSUAKI-M3-j7-exp2-plasma_PA_177	paplasma2	205	Sa_MITSUAKI-M3-j7-exp2-Plasma_BA_177.d	(01/12/17 00:00:00)	Sa_MITSUAKI-M3-j7-exp2-Plasma_BA_177	baplasma2	129	Sa_MITSUAKI-M3-j7-exp2-Plasma_GCMRM_177.D	(01/18/17 00:00:00)	Sa_MITSUAKI-M3-j7-exp2-Plasma_177	gcplasma2	129
ATB-j3-exp1-plasma_180	Sa_ATB-M6-j3-exp1-plasma_SF_180.d	(03/16/17 00:00:00)	Sa_ATB-M6-j3-exp1-plasma_SF_180	sfplasma1	167	Sa_ATB-M6-j3-exp1-plasma_PA_180.d	(03/22/17 00:00:00)	Sa_ATB-M6-j3-exp1-plasma_PA_180	paplasma1	168	Sa_ATB-M6-j3-exp1-plasma_BA_180.d	(01/09/17 00:00:00)	Sa_ATB-M6-j3-exp1-plasma_BA_180	baplasma1	73	Sa_ATB-M6-j3-exp1-plasma_GCMRM_180.D	(01/12/17 00:00:00)	Sa_ATB-M6-j3-exp1-plasma_180	gcplasma1	90
HIRAE-j14-exp1-plasma_238	Sa_HIRAE-M4-j14-exp1-plasma_SF_238.d	(03/16/17 00:00:00)	Sa_HIRAE-M4-j14-exp1-plasma_SF_238	sfplasma1	168	Sa_HIRAE-M4-j14-exp1-plasma_PA_238.d	(03/22/17 00:00:00)	Sa_HIRAE-M4-j14-exp1-plasma_PA_238	paplasma1	169	Sa_HIRAE-M4-j14-exp1-plasma_BA_238bis.d	(01/09/17 00:00:00)	Sa_HIRAE-M4-j14-exp1-plasma_BA_238bis	baplasma1	71	Sa_HIRAE-M4-j14-exp1-plasma_GCMRM_238.D	(01/12/17 00:00:00)	Sa_HIRAE-M4-j14-exp1-plasma_238	gcplasma1	91
Nacl-j7-exp2-plasma_160	Sa_Nacl-M4-j7-exp2-plasma_SF_160.d	(03/10/17 00:00:00)	Sa_Nacl-M4-j7-exp2-plasma_SF_160	sfplasma2	33	Sa_Nacl-M4-j7-exp2-plasma_PA_160.d	(03/25/17 00:00:00)	Sa_Nacl-M4-j7-exp2-plasma_PA_160	paplasma2	206	Sa_Nacl-M4-j7-exp2-Plasma_BA_160.d	(01/12/17 00:00:00)	Sa_Nacl-M4-j7-exp2-Plasma_BA_160	baplasma2	130	Sa_Nacl-M4-j7-exp2-Plasma_GCMRM_160.D	(01/18/17 00:00:00)	Sa_Nacl-M4-j7-exp2-Plasma_160	gcplasma2	130
FRAGILIS-j7-exp1-plasma_220	Sa_FRAGILIS-M4-j7-exp1-plasma_SF_220.d	(03/16/17 00:00:00)	Sa_FRAGILIS-M4-j7-exp1-plasma_SF_220	sfplasma1	163	Sa_FRAGILIS-M4-j7-exp1-plasma_PA_220.d	(03/22/17 00:00:00)	Sa_FRAGILIS-M4-j7-exp1-plasma_PA_220	paplasma1	164	Sa_FRAGILIS-M4-j7-exp1-plasma_BA_220.d	(01/12/17 00:00:00)	Sa_FRAGILIS-M4-j7-exp1-plasma_BA_220	baplasma1	88	Sa_FRAGILIS-M4-j7-exp1-plasma_GCMRM_220.D	(01/12/17 00:00:00)	Sa_FRAGILIS-M4-j7-exp1-plasma_220	gcplasma1	86
MITSUAKI-j7-exp2-plasma_179	Sa_MITSUAKI-M5-j7-exp2-plasma_SF_179.d	(03/10/17 00:00:00)	Sa_MITSUAKI-M5-j7-exp2-plasma_SF_179	sfplasma2	34	Sa_MITSUAKI-M5-j7-exp2-plasma_PA_179.d	(03/25/17 00:00:00)	Sa_MITSUAKI-M5-j7-exp2-plasma_PA_179	paplasma2	207	Sa_MITSUAKI-M5-j7-exp2-Plasma_BA_179.d	(01/12/17 00:00:00)	Sa_MITSUAKI-M5-j7-exp2-Plasma_BA_179	baplasma2	131	Sa_MITSUAKI-M5-j7-exp2-Plasma_GCMRM_179.D	(01/18/17 00:00:00)	Sa_MITSUAKI-M5-j7-exp2-Plasma_179	gcplasma2	131
MITSUAKI-j14-exp2-plasma_195	Sa_MITSUAKI-M3-j14-exp2-plasma_SF_195.d	(03/10/17 00:00:00)	Sa_MITSUAKI-M3-j14-exp2-plasma_SF_195	sfplasma2	36	Sa_MITSUAKI-M3-j14-exp2-plasma_PA_195.d	(03/25/17 00:00:00)	Sa_MITSUAKI-M3-j14-exp2-plasma_PA_195	paplasma2	209	Sa_MITSUAKI-M3-j14-exp2-Plasma_BA_195.d	(01/12/17 00:00:00)	Sa_MITSUAKI-M3-j14-exp2-Plasma_BA_195	baplasma2	133	Sa_MITSUAKI-M3-j14-exp2-Plasma_GCMRM_195.D	(01/18/17 00:00:00)	Sa_MITSUAKI-M3-j14-exp2-Plasma_195	gcplasma2	133
ATB-j7-exp2-plasma_164	Sa_ATB-M2-j7-exp2-plasma_SF_164b.d	(03/10/17 00:00:00)	Sa_ATB-M2-j7-exp2-plasma_SF_164b	sfplasma2	37	Sa_ATB-M2-j7-exp2-plasma_PA_164.d	(03/25/17 00:00:00)	Sa_ATB-M2-j7-exp2-plasma_PA_164	paplasma2	210	Sa_ATB-M2-j7-exp2-Plasma_BA_164.d	(01/12/17 00:00:00)	Sa_ATB-M2-j7-exp2-Plasma_BA_164	baplasma2	134	Sa_ATB-M2-j7-exp2-Plasma_GCMRM_164.D	(01/18/17 00:00:00)	Sa_ATB-M2-j7-exp2-Plasma_164	gcplasma2	134
BURKO-j7-exp2-plasma_170	Sa_BURKO-M2-j7-exp2-plasma_SF_170.d	(03/10/17 00:00:00)	Sa_BURKO-M2-j7-exp2-plasma_SF_170	sfplasma2	38	Sa_BURKO-M2-j7-exp2-plasma_PA_170.d	(03/25/17 00:00:00)	Sa_BURKO-M2-j7-exp2-plasma_PA_170	paplasma2	211	Sa_BURKO-M2-j7-exp2-Plasma_BA_170.d	(01/12/17 00:00:00)	Sa_BURKO-M2-j7-exp2-Plasma_BA_170	baplasma2	135	Sa_BURKO-M2-j7-exp2-Plasma_GCMRM_170.D	(01/18/17 00:00:00)	Sa_BURKO-M2-j7-exp2-Plasma_170	gcplasma2	135
Nacl-j7-exp2-plasma_158	Sa_Nacl-M2-j7-exp2-plasma_SF_158.d	(03/10/17 00:00:00)	Sa_Nacl-M2-j7-exp2-plasma_SF_158	sfplasma2	39	Sa_Nacl-M2-j7-exp2-plasma_PA_158.d	(03/25/17 00:00:00)	Sa_Nacl-M2-j7-exp2-plasma_PA_158	paplasma2	212	Sa_Nacl-M2-j7-exp2-Plasma_BA_158.d	(01/12/17 00:00:00)	Sa_Nacl-M2-j7-exp2-Plasma_BA_158	baplasma2	136	Sa_Nacl-M2-j7-exp2-Plasma_GCMRM_158.D	(01/18/17 00:00:00)	Sa_Nacl-M2-j7-exp2-Plasma_158	gcplasma2	136
ATB-j7-exp2-plasma_167	Sa_ATB-M5-j7-exp2-plasma_SF_167.d	(03/10/17 00:00:00)	Sa_ATB-M5-j7-exp2-plasma_SF_167	sfplasma2	40	Sa_ATB-M5-j7-exp2-plasma_PA_167.d	(03/25/17 00:00:00)	Sa_ATB-M5-j7-exp2-plasma_PA_167	paplasma2	213	Sa_ATB-M5-j7-exp2-Plasma_BA_167.d	(01/12/17 00:00:00)	Sa_ATB-M5-j7-exp2-Plasma_BA_167	baplasma2	137	Sa_ATB-M5-j7-exp2-Plasma_GCMRM_167.D	(01/18/17 00:00:00)	Sa_ATB-M5-j7-exp2-Plasma_167	gcplasma2	137
BARNECIELA-j3-exp1-plasma_198	Sa_BARNECIELA-M6-j3-exp1-plasma_SF_198.d	(03/16/17 00:00:00)	Sa_BARNECIELA-M6-j3-exp1-plasma_SF_198	sfplasma1	158	Sa_BARNECIELA-M6-j3-exp1-plasma_PA_198.d	(03/22/17 00:00:00)	Sa_BARNECIELA-M6-j3-exp1-plasma_PA_198	paplasma1	159	-	(NA NA)	-	-	-	Sa_BARNECIELA-M6-j3-exp1-plasma_GCMRM_198.D	(01/12/17 00:00:00)	Sa_BARNECIELA-M6-j3-exp1-plasma_198	gcplasma1	81
BURKO-j3-exp2-plasma_146	Sa_BURKO-M2-j3-exp2-plasma_SF_146.d	(03/10/17 00:00:00)	Sa_BURKO-M2-j3-exp2-plasma_SF_146	sfplasma2	41	Sa_BURKO-M2-j3-exp2-plasma_PA_146.d	(03/25/17 00:00:00)	Sa_BURKO-M2-j3-exp2-plasma_PA_146	paplasma2	214	Sa_BURKO-M2-j3-exp2-Plasma_BA_146.d	(01/12/17 00:00:00)	Sa_BURKO-M2-j3-exp2-Plasma_BA_146	baplasma2	138	Sa_BURKO-M2-j3-exp2-Plasma_GCMRM_146.D	(01/18/17 00:00:00)	Sa_BURKO-M2-j3-exp2-Plasma_146	gcplasma2	138
Nacl-j3-exp2-plasma_136	Sa_Nacl-M4-j3-exp2-plasma_SF_136.d	(03/10/17 00:00:00)	Sa_Nacl-M4-j3-exp2-plasma_SF_136	sfplasma2	42	Sa_Nacl-M4-j3-exp2-plasma_PA_136.d	(03/25/17 00:00:00)	Sa_Nacl-M4-j3-exp2-plasma_PA_136	paplasma2	215	Sa_Nacl-M4-j3-exp2-Plasma_BA_136.d	(01/12/17 00:00:00)	Sa_Nacl-M4-j3-exp2-Plasma_BA_136	baplasma2	139	Sa_Nacl-M4-j3-exp2-Plasma_GCMRM_136.D	(01/18/17 00:00:00)	Sa_Nacl-M4-j3-exp2-Plasma_136	gcplasma2	139
Nacl-j3-exp3-plasma_135	Sa_Nacl-M3-j3-exp3-plasma_SF_135.d	(03/16/17 00:00:00)	Sa_Nacl-M3-j3-exp3-plasma_SF_135	sfplasma3	175	Sa_Nacl-M3-j3-exp3-plasma_PA_135.d	(03/22/17 00:00:00)	Sa_Nacl-M3-j3-exp3-plasma_PA_135	paplasma3	4	Sa_Nacl-M3-j3-exp3-Plasma_BA_135.d	(01/12/17 00:00:00)	Sa_Nacl-M3-j3-exp3-Plasma_BA_135	baplasma3	181	Sa_Nacl-M3-j3-exp3-plasma_GCMRM_135.D	(01/21/17 00:00:00)	Sa_Nacl-M3-j3-exp3-plasma_135	gcplasma3	178
MITSUAKI-j3-exp2-plasma_152	Sa_MITSUAKI-M2-j3-exp2-plasma_SF_152.d	(03/10/17 00:00:00)	Sa_MITSUAKI-M2-j3-exp2-plasma_SF_152	sfplasma2	43	Sa_MITSUAKI-M2-j3-exp2-plasma_PA_152.d	(03/25/17 00:00:00)	Sa_MITSUAKI-M2-j3-exp2-plasma_PA_152	paplasma2	216	Sa_MITSUAKI-M2-j3-exp2-Plasma_BA_152.d	(01/12/17 00:00:00)	Sa_MITSUAKI-M2-j3-exp2-Plasma_BA_152	baplasma2	140	Sa_MITSUAKI-M2-j3-exp2-Plasma_GCMRM_152.D	(01/18/17 00:00:00)	Sa_MITSUAKI-M2-j3-exp2-Plasma_152	gcplasma2	140
FECES-j3-exp3-plasma_148	Sa_FECES-M4-j3-exp3-plasma_SF_148.d	(03/16/17 00:00:00)	Sa_FECES-M4-j3-exp3-plasma_SF_148	sfplasma3	176	Sa_FECES-M4-j3-exp3-plasma_PA_148.d	(03/22/17 00:00:00)	Sa_FECES-M4-j3-exp3-plasma_PA_148	paplasma3	5	Sa_FECES-M4-j3-exp3-Plasma_BA_148.d	(01/12/17 00:00:00)	Sa_FECES-M4-j3-exp3-Plasma_BA_148	baplasma3	182	Sa_FECES-M4-j3-exp3-plasma_GCMRM_148.D	(01/21/17 00:00:00)	Sa_FECES-M4-j3-exp3-plasma_148	gcplasma3	179
BURKO-j7-exp2-plasma_174	Sa_BURKO-M6-j7-exp2-plasma_SF_174.d	(03/10/17 00:00:00)	Sa_BURKO-M6-j7-exp2-plasma_SF_174	sfplasma2	44	Sa_BURKO-M6-j7-exp2-plasma_PA_174.d	(03/25/17 00:00:00)	Sa_BURKO-M6-j7-exp2-plasma_PA_174	paplasma2	217	Sa_BURKO-M6-j7-exp2-Plasma_BA_174.d	(01/12/17 00:00:00)	Sa_BURKO-M6-j7-exp2-Plasma_BA_174	baplasma2	141	Sa_BURKO-M6-j7-exp2-Plasma_GCMRM_174.D	(01/18/17 00:00:00)	Sa_BURKO-M6-j7-exp2-Plasma_174	gcplasma2	141
ATB-j7-exp3-plasma_165	Sa_ATB-M3-j7-exp3-plasma_SF_165.d	(03/16/17 00:00:00)	Sa_ATB-M3-j7-exp3-plasma_SF_165	sfplasma3	177	Sa_ATB-M3-j7-exp3-plasma_PA_165.d	(03/22/17 00:00:00)	Sa_ATB-M3-j7-exp3-plasma_PA_165	paplasma3	6	Sa_ATB-M3-j7-exp3-Plasma_BA_165.d	(01/12/17 00:00:00)	Sa_ATB-M3-j7-exp3-Plasma_BA_165	baplasma3	183	Sa_ATB-M3-j7-exp3-plasma_GCMRM_165.D	(01/21/17 00:00:00)	Sa_ATB-M3-j7-exp3-plasma_165	gcplasma3	180
ATB-j14-exp2-plasma_182	Sa_ATB-M2-j14-exp2-plasma_SF_182.d	(03/10/17 00:00:00)	Sa_ATB-M2-j14-exp2-plasma_SF_182	sfplasma2	45	Sa_ATB-M2-j14-exp2-plasma_PA_182.d	(03/25/17 00:00:00)	Sa_ATB-M2-j14-exp2-plasma_PA_182	paplasma2	218	Sa_ATB-M2-j14-exp2-Plasma_BA_182.d	(01/12/17 00:00:00)	Sa_ATB-M2-j14-exp2-Plasma_BA_182	baplasma2	142	Sa_ATB-M2-j14-exp2-Plasma_GCMRM_182.D	(01/18/17 00:00:00)	Sa_ATB-M2-j14-exp2-Plasma_182	gcplasma2	142
AKKERMANSIA-j14-exp3-plasma_195	Sa_AKKERMANSIA-M3-j14-exp3-plasma_SF_195.d	(03/16/17 00:00:00)	Sa_AKKERMANSIA-M3-j14-exp3-plasma_SF_195	sfplasma3	178	Sa_AKKERMANSIA-M3-j14-exp3-plasma_PA_195.d	(03/22/17 00:00:00)	Sa_AKKERMANSIA-M3-j14-exp3-plasma_PA_195	paplasma3	7	Sa_AKKERMANSIA-M3-j14-exp3-Plasma_BA_195.d	(01/12/17 00:00:00)	Sa_AKKERMANSIA-M3-j14-exp3-Plasma_BA_195	baplasma3	184	Sa_AKKERMANSIA-M3-j14-exp3-plasma_GCMRM_195.D	(01/21/17 00:00:00)	Sa_AKKERMANSIA-M3-j14-exp3-plasma_195	gcplasma3	181
Nacl-j7-exp3-plasma_159	Sa_Nacl-M3-j7-exp3-plasma_SF_159.d	(03/16/17 00:00:00)	Sa_Nacl-M3-j7-exp3-plasma_SF_159	sfplasma3	179	Sa_Nacl-M3-j7-exp3-plasma_PA_159.d	(03/22/17 00:00:00)	Sa_Nacl-M3-j7-exp3-plasma_PA_159	paplasma3	8	Sa_Nacl-M3-j7-exp3-Plasma_BA_159.d	(01/12/17 00:00:00)	Sa_Nacl-M3-j7-exp3-Plasma_BA_159	baplasma3	185	Sa_Nacl-M3-j7-exp3-plasma_GCMRM_159.D	(01/21/17 00:00:00)	Sa_Nacl-M3-j7-exp3-plasma_159	gcplasma3	182
MITSUAKI-j7-exp2-plasma_176	Sa_MITSUAKI-M2-j7-exp2-plasma_SF_176.d	(03/10/17 00:00:00)	Sa_MITSUAKI-M2-j7-exp2-plasma_SF_176	sfplasma2	47	Sa_MITSUAKI-M2-j7-exp2-plasma_PA_176.d	(03/25/17 00:00:00)	Sa_MITSUAKI-M2-j7-exp2-plasma_PA_176	paplasma2	220	Sa_MITSUAKI-M2-j7-exp2-Plasma_BA_176.d	(01/12/17 00:00:00)	Sa_MITSUAKI-M2-j7-exp2-Plasma_BA_176	baplasma2	144	Sa_MITSUAKI-M2-j7-exp2-Plasma_GCMRM_176.D	(01/18/17 00:00:00)	Sa_MITSUAKI-M2-j7-exp2-Plasma_176	gcplasma2	144
ATB-j3-exp3-plasma_141	Sa_ATB-M3-j3-exp3-plasma_SF_141.d	(03/16/17 00:00:00)	Sa_ATB-M3-j3-exp3-plasma_SF_141	sfplasma3	180	Sa_ATB-M3-j3-exp3-plasma_PA_141.d	(03/22/17 00:00:00)	Sa_ATB-M3-j3-exp3-plasma_PA_141	paplasma3	9	Sa_ATB-M3-j3-exp3-Plasma_BA_141.d	(01/12/17 00:00:00)	Sa_ATB-M3-j3-exp3-Plasma_BA_141	baplasma3	186	Sa_ATB-M3-j3-exp3-plasma_GCMRM_141.D	(01/21/17 00:00:00)	Sa_ATB-M3-j3-exp3-plasma_141	gcplasma3	183
ATB-j14-exp2-plasma_183	Sa_ATB-M3-j14-exp2-plasma_SF_183.d	(03/10/17 00:00:00)	Sa_ATB-M3-j14-exp2-plasma_SF_183	sfplasma2	48	Sa_ATB-M3-j14-exp2-plasma_PA_183.d	(03/25/17 00:00:00)	Sa_ATB-M3-j14-exp2-plasma_PA_183	paplasma2	221	Sa_ATB-M3-j14-exp2-Plasma_BA_183.d	(01/12/17 00:00:00)	Sa_ATB-M3-j14-exp2-Plasma_BA_183	baplasma2	145	Sa_ATB-M3-j14-exp2-Plasma_GCMRM_183.D	(01/18/17 00:00:00)	Sa_ATB-M3-j14-exp2-Plasma_183	gcplasma2	145
FECES-j7-exp3-plasma_172	Sa_FECES-M4-j7-exp3-plasma_SF_172.d	(03/16/17 00:00:00)	Sa_FECES-M4-j7-exp3-plasma_SF_172	sfplasma3	181	Sa_FECES-M4-j7-exp3-plasma_PA_172.d	(03/22/17 00:00:00)	Sa_FECES-M4-j7-exp3-plasma_PA_172	paplasma3	10	Sa_FECES-M4-j7-exp3-Plasma_BA_172.d	(01/12/17 00:00:00)	Sa_FECES-M4-j7-exp3-Plasma_BA_172	baplasma3	187	Sa_FECES-M4-j7-exp3-plasma_GCMRM_172.D	(01/21/17 00:00:00)	Sa_FECES-M4-j7-exp3-plasma_172	gcplasma3	184
BURKO-j14-exp2-plasma_188	Sa_BURKO-M2-j14-exp2-plasma_SF_188.d	(03/10/17 00:00:00)	Sa_BURKO-M2-j14-exp2-plasma_SF_188	sfplasma2	49	Sa_BURKO-M2-j14-exp2-plasma_PA_188.d	(03/25/17 00:00:00)	Sa_BURKO-M2-j14-exp2-plasma_PA_188	paplasma2	222	Sa_BURKO-M2-j14-exp2-Plasma_BA_188.d	(01/12/17 00:00:00)	Sa_BURKO-M2-j14-exp2-Plasma_BA_188	baplasma2	146	Sa_BURKO-M2-j14-exp2-Plasma_GCMRM_188.D	(01/18/17 00:00:00)	Sa_BURKO-M2-j14-exp2-Plasma_188	gcplasma2	146
AKKERMANSIA-j3-exp3-plasma_154	Sa_AKKERMANSIA-M4-j3-exp3-plasma_SF_154.d	(03/16/17 00:00:00)	Sa_AKKERMANSIA-M4-j3-exp3-plasma_SF_154	sfplasma3	182	Sa_AKKERMANSIA-M4-j3-exp3-plasma_PA_154.d	(03/22/17 00:00:00)	Sa_AKKERMANSIA-M4-j3-exp3-plasma_PA_154	paplasma3	11	Sa_AKKERMANSIA-M4-j3-exp3-Plasma_BA_154.d	(01/12/17 00:00:00)	Sa_AKKERMANSIA-M4-j3-exp3-Plasma_BA_154	baplasma3	188	Sa_AKKERMANSIA-M4-j3-exp3-plasma_GCMRM_154.D	(01/21/17 00:00:00)	Sa_AKKERMANSIA-M4-j3-exp3-plasma_154	gcplasma3	185
MITSUAKI-j14-exp2-plasma_194	Sa_MITSUAKI-M2-j14-exp2-plasma_SF_194.d	(03/10/17 00:00:00)	Sa_MITSUAKI-M2-j14-exp2-plasma_SF_194	sfplasma2	50	Sa_MITSUAKI-M2-j14-exp2-plasma_PA_194.d	(03/25/17 00:00:00)	Sa_MITSUAKI-M2-j14-exp2-plasma_PA_194	paplasma2	223	Sa_MITSUAKI-M2-j14-exp2-Plasma_BA_194.d	(01/12/17 00:00:00)	Sa_MITSUAKI-M2-j14-exp2-Plasma_BA_194	baplasma2	147	Sa_MITSUAKI-M2-j14-exp2-Plasma_GCMRM_194.D	(01/18/17 00:00:00)	Sa_MITSUAKI-M2-j14-exp2-Plasma_194	gcplasma2	147
ATB-j14-exp3-plasma_182	Sa_ATB-M2-j14-exp3-plasma_SF_182.d	(03/16/17 00:00:00)	Sa_ATB-M2-j14-exp3-plasma_SF_182	sfplasma3	183	Sa_ATB-M2-j14-exp3-plasma_PA_182.d	(03/22/17 00:00:00)	Sa_ATB-M2-j14-exp3-plasma_PA_182	paplasma3	12	Sa_ATB-M2-j14-exp3-Plasma_BA_182.d	(01/12/17 00:00:00)	Sa_ATB-M2-j14-exp3-Plasma_BA_182	baplasma3	189	Sa_ATB-M2-j14-exp3-plasma_GCMRM_182.D	(01/21/17 00:00:00)	Sa_ATB-M2-j14-exp3-plasma_182	gcplasma3	186
ATB-j3-exp2-plasma_143	Sa_ATB-M5-j3-exp2-plasma_SF_143.d	(03/10/17 00:00:00)	Sa_ATB-M5-j3-exp2-plasma_SF_143	sfplasma2	51	Sa_ATB-M5-j3-exp2-plasma_PA_143.d	(03/25/17 00:00:00)	Sa_ATB-M5-j3-exp2-plasma_PA_143	paplasma2	224	Sa_ATB-M5-j3-exp2-Plasma_BA_143.d	(01/12/17 00:00:00)	Sa_ATB-M5-j3-exp2-Plasma_BA_143	baplasma2	148	Sa_ATB-M5-j3-exp2-Plasma_GCMRM_143.D	(01/18/17 00:00:00)	Sa_ATB-M5-j3-exp2-Plasma_143	gcplasma2	148
FECES-j14-exp3-plasma_191	Sa_FECES-M5-j14-exp3-plasma_SF_191.d	(03/16/17 00:00:00)	Sa_FECES-M5-j14-exp3-plasma_SF_191	sfplasma3	184	Sa_FECES-M5-j14-exp3-plasma_PA_191.d	(03/22/17 00:00:00)	Sa_FECES-M5-j14-exp3-plasma_PA_191	paplasma3	13	Sa_FECES-M5-j14-exp3-Plasma_BA_191.d	(01/12/17 00:00:00)	Sa_FECES-M5-j14-exp3-Plasma_BA_191	baplasma3	190	Sa_FECES-M5-j14-exp3-plasma_GCMRM_191.D	(01/21/17 00:00:00)	Sa_FECES-M5-j14-exp3-plasma_191	gcplasma3	187
BURKO-j7-exp2-plasma_169	Sa_BURKO-M1-j7-exp2-plasma_SF_169.d	(03/10/17 00:00:00)	Sa_BURKO-M1-j7-exp2-plasma_SF_169	sfplasma2	52	Sa_BURKO-M1-j7-exp2-plasma_PA_169.d	(03/25/17 00:00:00)	Sa_BURKO-M1-j7-exp2-plasma_PA_169	paplasma2	225	Sa_BURKO-M1-j7-exp2-Plasma_BA_169.d	(01/12/17 00:00:00)	Sa_BURKO-M1-j7-exp2-Plasma_BA_169	baplasma2	149	Sa_BURKO-M1-j7-exp2-Plasma_GCMRM_169.D	(01/18/17 00:00:00)	Sa_BURKO-M1-j7-exp2-Plasma_169	gcplasma2	149
ATB-j7-exp2-plasma_168	Sa_ATB-M6-j7-exp2-plasma_SF_168.d	(03/10/17 00:00:00)	Sa_ATB-M6-j7-exp2-plasma_SF_168	sfplasma2	53	Sa_ATB-M6-j7-exp2-plasma_PA_168.d	(03/25/17 00:00:00)	Sa_ATB-M6-j7-exp2-plasma_PA_168	paplasma2	226	Sa_ATB-M6-j7-exp2-Plasma_BA_168.d	(01/12/17 00:00:00)	Sa_ATB-M6-j7-exp2-Plasma_BA_168	baplasma2	150	Sa_ATB-M6-j7-exp2-Plasma_GCMRM_168.D	(01/18/17 00:00:00)	Sa_ATB-M6-j7-exp2-Plasma_168	gcplasma2	150
Nacl-j3-exp3-plasma_137	Sa_Nacl-M5-j3-exp3-plasma_SF_137.d	(03/16/17 00:00:00)	Sa_Nacl-M5-j3-exp3-plasma_SF_137	sfplasma3	186	Sa_Nacl-M5-j3-exp3-plasma_PA_137.d	(03/22/17 00:00:00)	Sa_Nacl-M5-j3-exp3-plasma_PA_137	paplasma3	15	Sa_Nacl-M5-j3-exp3-Plasma_BA_137.d	(01/12/17 00:00:00)	Sa_Nacl-M5-j3-exp3-Plasma_BA_137	baplasma3	192	Sa_Nacl-M5-j3-exp3-plasma_GCMRM_137.D	(01/21/17 00:00:00)	Sa_Nacl-M5-j3-exp3-plasma_137	gcplasma3	189
Nacl-j7-exp2-plasma_157	Sa_Nacl-M1-j7-exp2-plasma_SF_157.d	(03/10/17 00:00:00)	Sa_Nacl-M1-j7-exp2-plasma_SF_157	sfplasma2	54	Sa_Nacl-M1-j7-exp2-plasma_PA_157.d	(03/25/17 00:00:00)	Sa_Nacl-M1-j7-exp2-plasma_PA_157	paplasma2	227	Sa_Nacl-M1-j7-exp2-Plasma_BA_157.d	(01/12/17 00:00:00)	Sa_Nacl-M1-j7-exp2-Plasma_BA_157	baplasma2	151	Sa_Nacl-M1-j7-exp2-Plasma_GCMRM_157.D	(01/18/17 00:00:00)	Sa_Nacl-M1-j7-exp2-Plasma_157	gcplasma2	151
AKKERMANSIA-j7-exp3-plasma_175	Sa_AKKERMANSIA-M1-j7-exp3-plasma_SF_175.d	(03/16/17 00:00:00)	Sa_AKKERMANSIA-M1-j7-exp3-plasma_SF_175	sfplasma3	187	Sa_AKKERMANSIA-M1-j7-exp3-plasma_PA_175.d	(03/22/17 00:00:00)	Sa_AKKERMANSIA-M1-j7-exp3-plasma_PA_175	paplasma3	16	Sa_AKKERMANSIA-M1-j7-exp3-Plasma_BA_175.d	(01/12/17 00:00:00)	Sa_AKKERMANSIA-M1-j7-exp3-Plasma_BA_175	baplasma3	193	Sa_AKKERMANSIA-M1-j7-exp3-plasma_GCMRM_175.D	(01/21/17 00:00:00)	Sa_AKKERMANSIA-M1-j7-exp3-plasma_175	gcplasma3	190
BURKO-j3-exp2-plasma_145	Sa_BURKO-M1-j3-exp2-plasma_SF_145.d	(03/10/17 00:00:00)	Sa_BURKO-M1-j3-exp2-plasma_SF_145	sfplasma2	55	Sa_BURKO-M1-j3-exp2-plasma_PA_145.d	(03/25/17 00:00:00)	Sa_BURKO-M1-j3-exp2-plasma_PA_145	paplasma2	228	Sa_BURKO-M1-j3-exp2-Plasma_BA_145.d	(01/12/17 00:00:00)	Sa_BURKO-M1-j3-exp2-Plasma_BA_145	baplasma2	152	Sa_BURKO-M1-j3-exp2-Plasma_GCMRM_145.D	(01/18/17 00:00:00)	Sa_BURKO-M1-j3-exp2-Plasma_145	gcplasma2	152
FECES-j7-exp3-plasma_169	Sa_FECES-M1-j7-exp3-plasma_SF_169.d	(03/16/17 00:00:00)	Sa_FECES-M1-j7-exp3-plasma_SF_169	sfplasma3	188	Sa_FECES-M1-j7-exp3-plasma_PA_169.d	(03/22/17 00:00:00)	Sa_FECES-M1-j7-exp3-plasma_PA_169	paplasma3	17	Sa_FECES-M1-j7-exp3-Plasma_BA_169.d	(01/12/17 00:00:00)	Sa_FECES-M1-j7-exp3-Plasma_BA_169	baplasma3	194	Sa_FECES-M1-j7-exp3-plasma_GCMRM_169.D	(01/21/17 00:00:00)	Sa_FECES-M1-j7-exp3-plasma_169	gcplasma3	191
Nacl-j3-exp2-plasma_133	Sa_Nacl-M1-j3-exp2-plasma_SF_133.d	(03/10/17 00:00:00)	Sa_Nacl-M1-j3-exp2-plasma_SF_133	sfplasma2	56	Sa_Nacl-M1-j3-exp2-plasma_PA_133.d	(03/25/17 00:00:00)	Sa_Nacl-M1-j3-exp2-plasma_PA_133	paplasma2	229	Sa_Nacl-M1-j3-exp2-Plasma_BA_133.d	(01/12/17 00:00:00)	Sa_Nacl-M1-j3-exp2-Plasma_BA_133	baplasma2	153	Sa_Nacl-M1-j3-exp2-Plasma_GCMRM_133.D	(01/18/17 00:00:00)	Sa_Nacl-M1-j3-exp2-Plasma_133	gcplasma2	153
ATB-j3-exp3-plasma_140	Sa_ATB-M2-j3-exp3-plasma_SF_140.d	(03/16/17 00:00:00)	Sa_ATB-M2-j3-exp3-plasma_SF_140	sfplasma3	189	Sa_ATB-M2-j3-exp3-plasma_PA_140.d	(03/22/17 00:00:00)	Sa_ATB-M2-j3-exp3-plasma_PA_140	paplasma3	18	Sa_ATB-M2-j3-exp3-Plasma_BA_140.d	(01/12/17 00:00:00)	Sa_ATB-M2-j3-exp3-Plasma_BA_140	baplasma3	195	Sa_ATB-M2-j3-exp3-plasma_GCMRM_140.D	(01/21/17 00:00:00)	Sa_ATB-M2-j3-exp3-plasma_140	gcplasma3	192
MITSUAKI-j3-exp2-plasma_151	Sa_MITSUAKI-M1-j3-exp2-plasma_SF_151.d	(03/10/17 00:00:00)	Sa_MITSUAKI-M1-j3-exp2-plasma_SF_151	sfplasma2	57	Sa_MITSUAKI-M1-j3-exp2-plasma_PA_151.d	(03/25/17 00:00:00)	Sa_MITSUAKI-M1-j3-exp2-plasma_PA_151	paplasma2	231	Sa_MITSUAKI-M1-j3-exp2-Plasma_BA_151.d	(01/12/17 00:00:00)	Sa_MITSUAKI-M1-j3-exp2-Plasma_BA_151	baplasma2	155	Sa_MITSUAKI-M1-j3-exp2-Plasma_GCMRM_151.D	(01/18/17 00:00:00)	Sa_MITSUAKI-M1-j3-exp2-Plasma_151	gcplasma2	155
AKKERMANSIA-j14-exp3-plasma_197	Sa_AKKERMANSIA-M5-j14-exp3-plasma_SF_197.d	(03/16/17 00:00:00)	Sa_AKKERMANSIA-M5-j14-exp3-plasma_SF_197	sfplasma3	190	Sa_AKKERMANSIA-M5-j14-exp3-plasma_PA_197.d	(03/22/17 00:00:00)	Sa_AKKERMANSIA-M5-j14-exp3-plasma_PA_197	paplasma3	19	Sa_AKKERMANSIA-M5-j14-exp3-Plasma_BA_197.d	(01/12/17 00:00:00)	Sa_AKKERMANSIA-M5-j14-exp3-Plasma_BA_197	baplasma3	196	Sa_AKKERMANSIA-M5-j14-exp3-plasma_GCMRM_197.D	(01/21/17 00:00:00)	Sa_AKKERMANSIA-M5-j14-exp3-plasma_197	gcplasma3	193
Nacl-j7-exp3-plasma_158	Sa_Nacl-M2-j7-exp3-plasma_SF_158.d	(03/16/17 00:00:00)	Sa_Nacl-M2-j7-exp3-plasma_SF_158	sfplasma3	191	Sa_Nacl-M2-j7-exp3-plasma_PA_158.d	(03/22/17 00:00:00)	Sa_Nacl-M2-j7-exp3-plasma_PA_158	paplasma3	20	Sa_Nacl-M2-j7-exp3-Plasma_BA_158.d	(01/12/17 00:00:00)	Sa_Nacl-M2-j7-exp3-Plasma_BA_158	baplasma3	197	Sa_Nacl-M2-j7-exp3-plasma_GCMRM_158.D	(01/21/17 00:00:00)	Sa_Nacl-M2-j7-exp3-plasma_158	gcplasma3	194
ATB-j7-exp2-plasma_163	Sa_ATB-M1-j7-exp2-plasma_SF_163.d	(03/10/17 00:00:00)	Sa_ATB-M1-j7-exp2-plasma_SF_163	sfplasma2	59	Sa_ATB-M1-j7-exp2-plasma_PA_163.d	(03/25/17 00:00:00)	Sa_ATB-M1-j7-exp2-plasma_PA_163	paplasma2	233	Sa_ATB-M1-j7-exp2-Plasma_BA_163.d	(01/12/17 00:00:00)	Sa_ATB-M1-j7-exp2-Plasma_BA_163	baplasma2	157	Sa_ATB-M1-j7-exp2-Plasma_GCMRM_163.D	(01/18/17 00:00:00)	Sa_ATB-M1-j7-exp2-Plasma_163	gcplasma2	157
FECES-j3-exp3-plasma_146	Sa_FECES-M2-j3-exp3-plasma_SF_146.d	(03/16/17 00:00:00)	Sa_FECES-M2-j3-exp3-plasma_SF_146	sfplasma3	192	Sa_FECES-M2-j3-exp3-plasma_PA_146.d	(03/22/17 00:00:00)	Sa_FECES-M2-j3-exp3-plasma_PA_146	paplasma3	21	Sa_FECES-M2-j3-exp3-Plasma_BA_146.d	(01/12/17 00:00:00)	Sa_FECES-M2-j3-exp3-Plasma_BA_146	baplasma3	198	Sa_FECES-M2-j3-exp3-plasma_GCMRM_146.D	(01/21/17 00:00:00)	Sa_FECES-M2-j3-exp3-plasma_146	gcplasma3	195
BURKO-j14-exp2-plasma_187	Sa_BURKO-M1-j14-exp2-plasma_SF_187.d	(03/10/17 00:00:00)	Sa_BURKO-M1-j14-exp2-plasma_SF_187	sfplasma2	60	Sa_BURKO-M1-j14-exp2-plasma_PA_187.d	(03/25/17 00:00:00)	Sa_BURKO-M1-j14-exp2-plasma_PA_187	paplasma2	234	Sa_BURKO-M1-j14-exp2-Plasma_BA_187.d	(01/12/17 00:00:00)	Sa_BURKO-M1-j14-exp2-Plasma_BA_187	baplasma2	158	Sa_BURKO-M1-j14-exp2-Plasma_GCMRM_187.D	(01/18/17 00:00:00)	Sa_BURKO-M1-j14-exp2-Plasma_187	gcplasma2	158
AKKERMANSIA-j3-exp3-plasma_152	Sa_AKKERMANSIA-M2-j3-exp3-plasma_SF_152.d	(03/16/17 00:00:00)	Sa_AKKERMANSIA-M2-j3-exp3-plasma_SF_152	sfplasma3	193	Sa_AKKERMANSIA-M2-j3-exp3-plasma_PA_152.d	(03/22/17 00:00:00)	Sa_AKKERMANSIA-M2-j3-exp3-plasma_PA_152	paplasma3	22	Sa_AKKERMANSIA-M2-j3-exp3-Plasma_BA_152.d	(01/12/17 00:00:00)	Sa_AKKERMANSIA-M2-j3-exp3-Plasma_BA_152	baplasma3	199	Sa_AKKERMANSIA-M2-j3-exp3-plasma_GCMRM_152.D	(01/21/17 00:00:00)	Sa_AKKERMANSIA-M2-j3-exp3-plasma_152	gcplasma3	196
Nacl-j3-exp2-plasma_138	Sa_Nacl-M6-j3-exp2-plasma_SF_138.d	(03/10/17 00:00:00)	Sa_Nacl-M6-j3-exp2-plasma_SF_138	sfplasma2	61	Sa_Nacl-M6-j3-exp2-plasma_PA_138.d	(03/25/17 00:00:00)	Sa_Nacl-M6-j3-exp2-plasma_PA_138	paplasma2	235	Sa_Nacl-M6-j3-exp2-Plasma_BA_138.d	(01/12/17 00:00:00)	Sa_Nacl-M6-j3-exp2-Plasma_BA_138	baplasma2	159	Sa_Nacl-M6-j3-exp2-Plasma_GCMRM_138.D	(01/18/17 00:00:00)	Sa_Nacl-M6-j3-exp2-Plasma_138	gcplasma2	159
ATB-j7-exp3-plasma_164	Sa_ATB-M2-j7-exp3-plasma_SF_164.d	(03/16/17 00:00:00)	Sa_ATB-M2-j7-exp3-plasma_SF_164	sfplasma3	194	Sa_ATB-M2-j7-exp3-plasma_PA_164.d	(03/22/17 00:00:00)	Sa_ATB-M2-j7-exp3-plasma_PA_164	paplasma3	23	Sa_ATB-M2-j7-exp3-Plasma_BA_164.d	(01/12/17 00:00:00)	Sa_ATB-M2-j7-exp3-Plasma_BA_164	baplasma3	200	Sa_ATB-M2-j7-exp3-plasma_GCMRM_164.D	(01/21/17 00:00:00)	Sa_ATB-M2-j7-exp3-plasma_164	gcplasma3	197
ATB-j14-exp2-plasma_186	Sa_ATB-M6-j14-exp2-plasma_SF_186.d	(03/10/17 00:00:00)	Sa_ATB-M6-j14-exp2-plasma_SF_186	sfplasma2	62	Sa_ATB-M6-j14-exp2-plasma_PA_186.d	(03/25/17 00:00:00)	Sa_ATB-M6-j14-exp2-plasma_PA_186	paplasma2	236	Sa_ATB-M6-j14-exp2-Plasma_BA_186.d	(01/12/17 00:00:00)	Sa_ATB-M6-j14-exp2-Plasma_BA_186	baplasma2	160	Sa_ATB-M6-j14-exp2-Plasma_GCMRM_186.D	(01/18/17 00:00:00)	Sa_ATB-M6-j14-exp2-Plasma_186	gcplasma2	160
Nacl-j3-exp3-plasma_136	Sa_Nacl-M4-j3-exp3-plasma_SF_136.d	(03/16/17 00:00:00)	Sa_Nacl-M4-j3-exp3-plasma_SF_136	sfplasma3	195	Sa_Nacl-M4-j3-exp3-plasma_PA_136.d	(03/22/17 00:00:00)	Sa_Nacl-M4-j3-exp3-plasma_PA_136	paplasma3	24	Sa_Nacl-M4-j3-exp3-Plasma_BA_136.d	(01/12/17 00:00:00)	Sa_Nacl-M4-j3-exp3-Plasma_BA_136	baplasma3	201	Sa_Nacl-M4-j3-exp3-plasma_GCMRM_136.D	(01/21/17 00:00:00)	Sa_Nacl-M4-j3-exp3-plasma_136	gcplasma3	198
MITSUAKI-j14-exp2-plasma_193	Sa_MITSUAKI-M1-j14-exp2-plasma_SF_193.d	(03/10/17 00:00:00)	Sa_MITSUAKI-M1-j14-exp2-plasma_SF_193	sfplasma2	63	Sa_MITSUAKI-M1-j14-exp2-plasma_PA_193.d	(03/25/17 00:00:00)	Sa_MITSUAKI-M1-j14-exp2-plasma_PA_193	paplasma2	237	Sa_MITSUAKI-M1-j14-exp2-Plasma_BA_193.d	(01/12/17 00:00:00)	Sa_MITSUAKI-M1-j14-exp2-Plasma_BA_193	baplasma2	161	Sa_MITSUAKI-M1-j14-exp2-Plasma_GCMRM_193.D	(01/18/17 00:00:00)	Sa_MITSUAKI-M1-j14-exp2-Plasma_193	gcplasma2	161
AKKERMANSIA-j14-exp3-plasma_193	Sa_AKKERMANSIA-M1-j14-exp3-plasma_SF_193.d	(03/16/17 00:00:00)	Sa_AKKERMANSIA-M1-j14-exp3-plasma_SF_193	sfplasma3	196	Sa_AKKERMANSIA-M1-j14-exp3-plasma_PA_193.d	(03/22/17 00:00:00)	Sa_AKKERMANSIA-M1-j14-exp3-plasma_PA_193	paplasma3	25	Sa_AKKERMANSIA-M1-j14-exp3-Plasma_BA_193.d	(01/12/17 00:00:00)	Sa_AKKERMANSIA-M1-j14-exp3-Plasma_BA_193	baplasma3	202	Sa_AKKERMANSIA-M1-j14-exp3-plasma_GCMRM_193.D	(01/21/17 00:00:00)	Sa_AKKERMANSIA-M1-j14-exp3-plasma_193	gcplasma3	199
MITSUAKI-j3-exp2-plasma_155	Sa_MITSUAKI-M5-j3-exp2-plasma_SF_155.d	(03/10/17 00:00:00)	Sa_MITSUAKI-M5-j3-exp2-plasma_SF_155	sfplasma2	64	Sa_MITSUAKI-M5-j3-exp2-plasma_PA_155.d	(03/25/17 00:00:00)	Sa_MITSUAKI-M5-j3-exp2-plasma_PA_155	paplasma2	238	Sa_MITSUAKI-M5-j3-exp2-Plasma_BA_155.d	(01/12/17 00:00:00)	Sa_MITSUAKI-M5-j3-exp2-Plasma_BA_155	baplasma2	162	Sa_MITSUAKI-M5-j3-exp2-Plasma_GCMRM_155.D	(01/18/17 00:00:00)	Sa_MITSUAKI-M5-j3-exp2-Plasma_155	gcplasma2	162
BURKO-j14-exp2-plasma_192	Sa_BURKO-M6-j14-exp2-plasma_SF_192.d	(03/10/17 00:00:00)	Sa_BURKO-M6-j14-exp2-plasma_SF_192	sfplasma2	65	Sa_BURKO-M6-j14-exp2-plasma_PA_192.d	(03/25/17 00:00:00)	Sa_BURKO-M6-j14-exp2-plasma_PA_192	paplasma2	239	Sa_BURKO-M6-j14-exp2-Plasma_BA_192.d	(01/12/17 00:00:00)	Sa_BURKO-M6-j14-exp2-Plasma_BA_192	baplasma2	163	Sa_BURKO-M6-j14-exp2-Plasma_GCMRM_192.D	(01/18/17 00:00:00)	Sa_BURKO-M6-j14-exp2-Plasma_192	gcplasma2	163
ATB-j3-exp3-plasma_143	Sa_ATB-M5-j3-exp3-plasma_SF_143.d	(03/16/17 00:00:00)	Sa_ATB-M5-j3-exp3-plasma_SF_143	sfplasma3	198	Sa_ATB-M5-j3-exp3-plasma_PA_143.d	(03/22/17 00:00:00)	Sa_ATB-M5-j3-exp3-plasma_PA_143	paplasma3	27	Sa_ATB-M5-j3-exp3-Plasma_BA_143.d	(01/12/17 00:00:00)	Sa_ATB-M5-j3-exp3-Plasma_BA_143	baplasma3	204	Sa_ATB-M5-j3-exp3-plasma_GCMRM_143.D	(01/21/17 00:00:00)	Sa_ATB-M5-j3-exp3-plasma_143	gcplasma3	201
MITSUAKI-j7-exp2-plasma_180	Sa_MITSUAKI-M6-j7-exp2-plasma_SF_180.d	(03/10/17 00:00:00)	Sa_MITSUAKI-M6-j7-exp2-plasma_SF_180	sfplasma2	66	Sa_MITSUAKI-M6-j7-exp2-plasma_PA_180.d	(03/25/17 00:00:00)	Sa_MITSUAKI-M6-j7-exp2-plasma_PA_180	paplasma2	240	Sa_MITSUAKI-M6-j7-exp2-Plasma_BA_180.d	(01/12/17 00:00:00)	Sa_MITSUAKI-M6-j7-exp2-Plasma_BA_180	baplasma2	164	Sa_MITSUAKI-M6-j7-exp2-Plasma_GCMRM_180.D	(01/18/17 00:00:00)	Sa_MITSUAKI-M6-j7-exp2-Plasma_180	gcplasma2	164
FECES-j7-exp3-plasma_173	Sa_FECES-M5-j7-exp3-plasma_SF_173.d	(03/16/17 00:00:00)	Sa_FECES-M5-j7-exp3-plasma_SF_173	sfplasma3	199	Sa_FECES-M5-j7-exp3-plasma_PA_173.d	(03/22/17 00:00:00)	Sa_FECES-M5-j7-exp3-plasma_PA_173	paplasma3	28	Sa_FECES-M5-j7-exp3-Plasma_BA_173.d	(01/12/17 00:00:00)	Sa_FECES-M5-j7-exp3-Plasma_BA_173	baplasma3	205	Sa_FECES-M5-j7-exp3-plasma_GCMRM_173.D	(01/21/17 00:00:00)	Sa_FECES-M5-j7-exp3-plasma_173	gcplasma3	202
BURKO-j7-exp2-plasma_173	Sa_BURKO-M5-j7-exp2-plasma_SF_173.d	(03/10/17 00:00:00)	Sa_BURKO-M5-j7-exp2-plasma_SF_173	sfplasma2	67	Sa_BURKO-M5-j7-exp2-plasma_PA_173.d	(03/25/17 00:00:00)	Sa_BURKO-M5-j7-exp2-plasma_PA_173	paplasma2	241	Sa_BURKO-M5-j7-exp2-Plasma_BA_173.d	(01/12/17 00:00:00)	Sa_BURKO-M5-j7-exp2-Plasma_BA_173	baplasma2	165	Sa_BURKO-M5-j7-exp2-Plasma_GCMRM_173.D	(01/18/17 00:00:00)	Sa_BURKO-M5-j7-exp2-Plasma_173	gcplasma2	165
AKKERMANSIA-j7-exp3-plasma_178	Sa_AKKERMANSIA-M4-j7-exp3-plasma_SF_178.d	(03/16/17 00:00:00)	Sa_AKKERMANSIA-M4-j7-exp3-plasma_SF_178	sfplasma3	200	Sa_AKKERMANSIA-M4-j7-exp3-plasma_PA_178.d	(03/22/17 00:00:00)	Sa_AKKERMANSIA-M4-j7-exp3-plasma_PA_178	paplasma3	29	Sa_AKKERMANSIA-M4-j7-exp3-Plasma_BA_178.d	(01/12/17 00:00:00)	Sa_AKKERMANSIA-M4-j7-exp3-Plasma_BA_178	baplasma3	206	Sa_AKKERMANSIA-M4-j7-exp3-plasma_GCMRM_178.D	(01/21/17 00:00:00)	Sa_AKKERMANSIA-M4-j7-exp3-plasma_178	gcplasma3	203
Nacl-j7-exp2-plasma_162	Sa_Nacl-M6-j7-exp2-plasma_SF_162.d	(03/10/17 00:00:00)	Sa_Nacl-M6-j7-exp2-plasma_SF_162	sfplasma2	68	Sa_Nacl-M6-j7-exp2-plasma_PA_162.d	(03/25/17 00:00:00)	Sa_Nacl-M6-j7-exp2-plasma_PA_162	paplasma2	242	Sa_Nacl-M6-j7-exp2-Plasma_BA_162.d	(01/12/17 00:00:00)	Sa_Nacl-M6-j7-exp2-Plasma_BA_162	baplasma2	166	Sa_Nacl-M6-j7-exp2-Plasma_GCMRM_162.D	(01/18/17 00:00:00)	Sa_Nacl-M6-j7-exp2-Plasma_162	gcplasma2	166
ATB-j14-exp3-plasma_185	Sa_ATB-M5-j14-exp3-plasma_SF_185.d	(03/16/17 00:00:00)	Sa_ATB-M5-j14-exp3-plasma_SF_185	sfplasma3	201	Sa_ATB-M5-j14-exp3-plasma_PA_185.d	(03/22/17 00:00:00)	Sa_ATB-M5-j14-exp3-plasma_PA_185	paplasma3	30	Sa_ATB-M5-j14-exp3-Plasma_BA_185.d	(01/12/17 00:00:00)	Sa_ATB-M5-j14-exp3-Plasma_BA_185	baplasma3	207	Sa_ATB-M5-j14-exp3-plasma_GCMRM_185.D	(01/21/17 00:00:00)	Sa_ATB-M5-j14-exp3-plasma_185	gcplasma3	204
MITSUAKI-j7-exp2-plasma_175	Sa_MITSUAKI-M1-j7-exp2-plasma_SF_175.d	(03/10/17 00:00:00)	Sa_MITSUAKI-M1-j7-exp2-plasma_SF_175	sfplasma2	69	Sa_MITSUAKI-M1-j7-exp2-plasma_PA_175.d	(03/25/17 00:00:00)	Sa_MITSUAKI-M1-j7-exp2-plasma_PA_175	paplasma2	243	Sa_MITSUAKI-M1-j7-exp2-Plasma_BA_175.d	(01/12/17 00:00:00)	Sa_MITSUAKI-M1-j7-exp2-Plasma_BA_175	baplasma2	167	Sa_MITSUAKI-M1-j7-exp2-Plasma_GCMRM_175.D	(01/18/17 00:00:00)	Sa_MITSUAKI-M1-j7-exp2-Plasma_175	gcplasma2	167
Nacl-j7-exp3-plasma_160	Sa_Nacl-M4-j7-exp3-plasma_SF_160.d	(03/16/17 00:00:00)	Sa_Nacl-M4-j7-exp3-plasma_SF_160	sfplasma3	202	Sa_Nacl-M4-j7-exp3-plasma_PA_160.d	(03/22/17 00:00:00)	Sa_Nacl-M4-j7-exp3-plasma_PA_160	paplasma3	31	Sa_Nacl-M4-j7-exp3-Plasma_BA_160.d	(01/12/17 00:00:00)	Sa_Nacl-M4-j7-exp3-Plasma_BA_160	baplasma3	208	Sa_Nacl-M4-j7-exp3-plasma_GCMRM_160.D	(01/21/17 00:00:00)	Sa_Nacl-M4-j7-exp3-plasma_160	gcplasma3	205
FECES-j14-exp3-plasma_190	Sa_FECES-M4-j14-exp3-plasma_SF_190.d	(03/16/17 00:00:00)	Sa_FECES-M4-j14-exp3-plasma_SF_190	sfplasma3	203	Sa_FECES-M4-j14-exp3-plasma_PA_190.d	(03/22/17 00:00:00)	Sa_FECES-M4-j14-exp3-plasma_PA_190	paplasma3	32	Sa_FECES-M4-j14-exp3-Plasma_BA_190.d	(01/12/17 00:00:00)	Sa_FECES-M4-j14-exp3-Plasma_BA_190	baplasma3	209	Sa_FECES-M4-j14-exp3-plasma_GCMRM_190.D	(01/21/17 00:00:00)	Sa_FECES-M4-j14-exp3-plasma_190	gcplasma3	206
BURKO-j3-exp2-plasma_149	Sa_BURKO-M5-j3-exp2-plasma_SF_149.d	(03/10/17 00:00:00)	Sa_BURKO-M5-j3-exp2-plasma_SF_149	sfplasma2	70	Sa_BURKO-M5-j3-exp2-plasma_PA_149.d	(03/25/17 00:00:00)	Sa_BURKO-M5-j3-exp2-plasma_PA_149	paplasma2	245	Sa_BURKO-M5-j3-exp2-Plasma_BA_149.d	(01/12/17 00:00:00)	Sa_BURKO-M5-j3-exp2-Plasma_BA_149	baplasma2	169	Sa_BURKO-M5-j3-exp2-Plasma_GCMRM_149.D	(01/18/17 00:00:00)	Sa_BURKO-M5-j3-exp2-Plasma_149	gcplasma2	169
ATB-j7-exp3-plasma_167	Sa_ATB-M5-j7-exp3-plasma_SF_167.d	(03/16/17 00:00:00)	Sa_ATB-M5-j7-exp3-plasma_SF_167	sfplasma3	204	Sa_ATB-M5-j7-exp3-plasma_PA_167.d	(03/22/17 00:00:00)	Sa_ATB-M5-j7-exp3-plasma_PA_167	paplasma3	33	Sa_ATB-M5-j7-exp3-Plasma_BA_167.d	(01/12/17 00:00:00)	Sa_ATB-M5-j7-exp3-Plasma_BA_167	baplasma3	210	Sa_ATB-M5-j7-exp3-plasma_GCMRM_167.D	(01/21/17 00:00:00)	Sa_ATB-M5-j7-exp3-plasma_167	gcplasma3	207
MITSUAKI-j14-exp2-plasma_198	Sa_MITSUAKI-M6-j14-exp2-plasma_SF_198.d	(03/10/17 00:00:00)	Sa_MITSUAKI-M6-j14-exp2-plasma_SF_198	sfplasma2	71	Sa_MITSUAKI-M6-j14-exp2-plasma_PA_198.d	(03/25/17 00:00:00)	Sa_MITSUAKI-M6-j14-exp2-plasma_PA_198	paplasma2	246	Sa_MITSUAKI-M6-j14-exp2-Plasma_BA_198.d	(01/12/17 00:00:00)	Sa_MITSUAKI-M6-j14-exp2-Plasma_BA_198	baplasma2	170	Sa_MITSUAKI-M6-j14-exp2-Plasma_GCMRM_198.D	(01/18/17 00:00:00)	Sa_MITSUAKI-M6-j14-exp2-Plasma_198	gcplasma2	170
AKKERMANSIA-j3-exp3-plasma_151	Sa_AKKERMANSIA-M1-j3-exp3-plasma_SF_151.d	(03/16/17 00:00:00)	Sa_AKKERMANSIA-M1-j3-exp3-plasma_SF_151	sfplasma3	205	Sa_AKKERMANSIA-M1-j3-exp3-plasma_PA_151.d	(03/22/17 00:00:00)	Sa_AKKERMANSIA-M1-j3-exp3-plasma_PA_151	paplasma3	34	Sa_AKKERMANSIA-M1-j3-exp3-Plasma_BA_151.d	(01/12/17 00:00:00)	Sa_AKKERMANSIA-M1-j3-exp3-Plasma_BA_151	baplasma3	211	Sa_AKKERMANSIA-M1-j3-exp3-plasma_GCMRM_151.D	(01/21/17 00:00:00)	Sa_AKKERMANSIA-M1-j3-exp3-plasma_151	gcplasma3	208
FECES-j7-exp3-plasma_170	Sa_FECES-M2-j7-exp3-plasma_SF_170.d	(03/16/17 00:00:00)	Sa_FECES-M2-j7-exp3-plasma_SF_170	sfplasma3	206	Sa_FECES-M2-j7-exp3-plasma_PA_170.d	(03/22/17 00:00:00)	Sa_FECES-M2-j7-exp3-plasma_PA_170	paplasma3	35	Sa_FECES-M2-j7-exp3-Plasma_BA_170.d	(01/12/17 00:00:00)	Sa_FECES-M2-j7-exp3-Plasma_BA_170	baplasma3	212	Sa_FECES-M2-j7-exp3-plasma_GCMRM_170.D	(01/21/17 00:00:00)	Sa_FECES-M2-j7-exp3-plasma_170	gcplasma3	209
Nacl-j3-exp3-plasma_138	Sa_Nacl-M6-j3-exp3-plasma_SF_138.d	(03/16/17 00:00:00)	Sa_Nacl-M6-j3-exp3-plasma_SF_138	sfplasma3	207	Sa_Nacl-M6-j3-exp3-plasma_PA_138.d	(03/22/17 00:00:00)	Sa_Nacl-M6-j3-exp3-plasma_PA_138	paplasma3	36	Sa_Nacl-M6-j3-exp3-Plasma_BA_138.d	(01/12/17 00:00:00)	Sa_Nacl-M6-j3-exp3-Plasma_BA_138	baplasma3	213	Sa_Nacl-M6-j3-exp3-plasma_GCMRM_138.D	(01/21/17 00:00:00)	Sa_Nacl-M6-j3-exp3-plasma_138	gcplasma3	210
AKKERMANSIA-j14-exp3-plasma_196	Sa_AKKERMANSIA-M4-j14-exp3-plasma_SF_196.d	(03/16/17 00:00:00)	Sa_AKKERMANSIA-M4-j14-exp3-plasma_SF_196	sfplasma3	208	Sa_AKKERMANSIA-M4-j14-exp3-plasma_PA_196.d	(03/22/17 00:00:00)	Sa_AKKERMANSIA-M4-j14-exp3-plasma_PA_196	paplasma3	37	Sa_AKKERMANSIA-M4-j14-exp3-Plasma_BA_196.d	(01/12/17 00:00:00)	Sa_AKKERMANSIA-M4-j14-exp3-Plasma_BA_196	baplasma3	214	Sa_AKKERMANSIA-M4-j14-exp3-plasma_GCMRM_196.D	(01/21/17 00:00:00)	Sa_AKKERMANSIA-M4-j14-exp3-plasma_196	gcplasma3	211
FECES-j3-exp3-plasma_149	Sa_FECES-M5-j3-exp3-plasma_SF_149.d	(03/16/17 00:00:00)	Sa_FECES-M5-j3-exp3-plasma_SF_149	sfplasma3	210	Sa_FECES-M5-j3-exp3-plasma_PA_149.d	(03/22/17 00:00:00)	Sa_FECES-M5-j3-exp3-plasma_PA_149	paplasma3	39	Sa_FECES-M5-j3-exp3-Plasma_BA_149.d	(01/12/17 00:00:00)	Sa_FECES-M5-j3-exp3-Plasma_BA_149	baplasma3	216	Sa_FECES-M5-j3-exp3-plasma_GCMRM_149.D	(01/21/17 00:00:00)	Sa_FECES-M5-j3-exp3-plasma_149	gcplasma3	213
ATB-j3-exp3-plasma_139	Sa_ATB-M1-j3-exp3-plasma_SF_139.d	(03/16/17 00:00:00)	Sa_ATB-M1-j3-exp3-plasma_SF_139	sfplasma3	211	Sa_ATB-M1-j3-exp3-plasma_PA_139.d	(03/22/17 00:00:00)	Sa_ATB-M1-j3-exp3-plasma_PA_139	paplasma3	40	Sa_ATB-M1-j3-exp3-Plasma_BA_139.d	(01/12/17 00:00:00)	Sa_ATB-M1-j3-exp3-Plasma_BA_139	baplasma3	217	Sa_ATB-M1-j3-exp3-plasma_GCMRM_139.D	(01/21/17 00:00:00)	Sa_ATB-M1-j3-exp3-plasma_139	gcplasma3	214
FECES-j14-exp3-plasma_192	Sa_FECES-M6-j14-exp3-plasma_SF_192.d	(03/16/17 00:00:00)	Sa_FECES-M6-j14-exp3-plasma_SF_192	sfplasma3	212	Sa_FECES-M6-j14-exp3-plasma_PA_192.d	(03/22/17 00:00:00)	Sa_FECES-M6-j14-exp3-plasma_PA_192	paplasma3	41	Sa_FECES-M6-j14-exp3-Plasma_BA_192.d	(01/12/17 00:00:00)	Sa_FECES-M6-j14-exp3-Plasma_BA_192	baplasma3	218	Sa_FECES-M6-j14-exp3-plasma_GCMRM_192.D	(01/21/17 00:00:00)	Sa_FECES-M6-j14-exp3-plasma_192	gcplasma3	215
AKKERMANSIA-j7-exp3-plasma_176	Sa_AKKERMANSIA-M2-j7-exp3-plasma_SF_176.d	(03/16/17 00:00:00)	Sa_AKKERMANSIA-M2-j7-exp3-plasma_SF_176	sfplasma3	213	Sa_AKKERMANSIA-M2-j7-exp3-plasma_PA_176.d	(03/22/17 00:00:00)	Sa_AKKERMANSIA-M2-j7-exp3-plasma_PA_176	paplasma3	42	Sa_AKKERMANSIA-M2-j7-exp3-Plasma_BA_176.d	(01/12/17 00:00:00)	Sa_AKKERMANSIA-M2-j7-exp3-Plasma_BA_176	baplasma3	219	Sa_AKKERMANSIA-M2-j7-exp3-plasma_GCMRM_176.D	(01/21/17 00:00:00)	Sa_AKKERMANSIA-M2-j7-exp3-plasma_176	gcplasma3	216
Nacl-j3-exp3-plasma_134	Sa_Nacl-M2-j3-exp3-plasma_SF_134.d	(03/16/17 00:00:00)	Sa_Nacl-M2-j3-exp3-plasma_SF_134	sfplasma3	214	Sa_Nacl-M2-j3-exp3-plasma_PA_134.d	(03/22/17 00:00:00)	Sa_Nacl-M2-j3-exp3-plasma_PA_134	paplasma3	43	Sa_Nacl-M2-j3-exp3-Plasma_BA_134.d	(01/12/17 00:00:00)	Sa_Nacl-M2-j3-exp3-Plasma_BA_134	baplasma3	220	Sa_Nacl-M2-j3-exp3-plasma_GCMRM_134.D	(01/21/17 00:00:00)	Sa_Nacl-M2-j3-exp3-plasma_134	gcplasma3	217
ATB-j14-exp3-plasma_184	Sa_ATB-M4-j14-exp3-plasma_SF_184.d	(03/16/17 00:00:00)	Sa_ATB-M4-j14-exp3-plasma_SF_184	sfplasma3	215	Sa_ATB-M4-j14-exp3-plasma_PA_184.d	(03/22/17 00:00:00)	Sa_ATB-M4-j14-exp3-plasma_PA_184	paplasma3	44	Sa_ATB-M4-j14-exp3-Plasma_BA_184.d	(01/12/17 00:00:00)	Sa_ATB-M4-j14-exp3-Plasma_BA_184	baplasma3	221	Sa_ATB-M4-j14-exp3-plasma_GCMRM_184.D	(01/21/17 00:00:00)	Sa_ATB-M4-j14-exp3-plasma_184	gcplasma3	218
AKKERMANSIA-j3-exp3-plasma_155	Sa_AKKERMANSIA-M5-j3-exp3-plasma_SF_155.d	(03/16/17 00:00:00)	Sa_AKKERMANSIA-M5-j3-exp3-plasma_SF_155	sfplasma3	216	Sa_AKKERMANSIA-M5-j3-exp3-plasma_PA_155.d	(03/22/17 00:00:00)	Sa_AKKERMANSIA-M5-j3-exp3-plasma_PA_155	paplasma3	45	Sa_AKKERMANSIA-M5-j3-exp3-Plasma_BA_155.d	(01/12/17 00:00:00)	Sa_AKKERMANSIA-M5-j3-exp3-Plasma_BA_155	baplasma3	222	Sa_AKKERMANSIA-M5-j3-exp3-plasma_GCMRM_155.D	(01/21/17 00:00:00)	Sa_AKKERMANSIA-M5-j3-exp3-plasma_155	gcplasma3	219
FECES-j7-exp3-plasma_171	Sa_FECES-M3-j7-exp3-plasma_SF_171.d	(03/16/17 00:00:00)	Sa_FECES-M3-j7-exp3-plasma_SF_171	sfplasma3	217	Sa_FECES-M3-j7-exp3-plasma_PA_171.d	(03/22/17 00:00:00)	Sa_FECES-M3-j7-exp3-plasma_PA_171	paplasma3	46	Sa_FECES-M3-j7-exp3-Plasma_BA_171.d	(01/12/17 00:00:00)	Sa_FECES-M3-j7-exp3-Plasma_BA_171	baplasma3	223	Sa_FECES-M3-j7-exp3-plasma_GCMRM_171.D	(01/21/17 00:00:00)	Sa_FECES-M3-j7-exp3-plasma_171	gcplasma3	220
ATB-j7-exp3-plasma_166	Sa_ATB-M4-j7-exp3-plasma_SF_166.d	(03/16/17 00:00:00)	Sa_ATB-M4-j7-exp3-plasma_SF_166	sfplasma3	218	Sa_ATB-M4-j7-exp3-plasma_PA_166.d	(03/22/17 00:00:00)	Sa_ATB-M4-j7-exp3-plasma_PA_166	paplasma3	47	Sa_ATB-M4-j7-exp3-Plasma_BA_166.d	(01/12/17 00:00:00)	Sa_ATB-M4-j7-exp3-Plasma_BA_166	baplasma3	224	Sa_ATB-M4-j7-exp3-plasma_GCMRM_166.D	(01/21/17 00:00:00)	Sa_ATB-M4-j7-exp3-plasma_166	gcplasma3	221
AKKERMANSIA-j14-exp3-plasma_194	Sa_AKKERMANSIA-M2-j14-exp3-plasma_SF_194.d	(03/16/17 00:00:00)	Sa_AKKERMANSIA-M2-j14-exp3-plasma_SF_194	sfplasma3	219	Sa_AKKERMANSIA-M2-j14-exp3-plasma_PA_194.d	(03/22/17 00:00:00)	Sa_AKKERMANSIA-M2-j14-exp3-plasma_PA_194	paplasma3	48	Sa_AKKERMANSIA-M2-j14-exp3-Plasma_BA_194.d	(01/12/17 00:00:00)	Sa_AKKERMANSIA-M2-j14-exp3-Plasma_BA_194	baplasma3	225	Sa_AKKERMANSIA-M2-j14-exp3-plasma_GCMRM_194.D	(01/21/17 00:00:00)	Sa_AKKERMANSIA-M2-j14-exp3-plasma_194	gcplasma3	222
ATB-j3-exp2-plasma_139	-	(NA NA)	-	-	-	Sa_ATB-M1-j3-exp2-plasma_PA_139.d	(03/25/17 00:00:00)	Sa_ATB-M1-j3-exp2-plasma_PA_139	paplasma2	230	Sa_ATB-M1-j3-exp2-Plasma_BA_139.d	(01/12/17 00:00:00)	Sa_ATB-M1-j3-exp2-Plasma_BA_139	baplasma2	154	Sa_ATB-M1-j3-exp2-Plasma_GCMRM_139.D	(01/18/17 00:00:00)	Sa_ATB-M1-j3-exp2-Plasma_139	gcplasma2	154
Nacl-j7-exp3-plasma_157	Sa_Nacl-M1-j7-exp3-plasma_SF_157.d	(03/16/17 00:00:00)	Sa_Nacl-M1-j7-exp3-plasma_SF_157	sfplasma3	220	Sa_Nacl-M1-j7-exp3-plasma_PA_157.d	(03/22/17 00:00:00)	Sa_Nacl-M1-j7-exp3-plasma_PA_157	paplasma3	49	Sa_Nacl-M1-j7-exp3-Plasma_BA_157.d	(01/12/17 00:00:00)	Sa_Nacl-M1-j7-exp3-Plasma_BA_157	baplasma3	226	Sa_Nacl-M1-j7-exp3-plasma_GCMRM_157.D	(01/21/17 00:00:00)	Sa_Nacl-M1-j7-exp3-plasma_157	gcplasma3	223
FECES-j3-exp3-plasma_147	Sa_FECES-M3-j3-exp3-plasma_SF_147.d	(03/16/17 00:00:00)	Sa_FECES-M3-j3-exp3-plasma_SF_147	sfplasma3	222	Sa_FECES-M3-j3-exp3-plasma_PA_147.d	(03/22/17 00:00:00)	Sa_FECES-M3-j3-exp3-plasma_PA_147	paplasma3	51	Sa_FECES-M3-j3-exp3-Plasma_BA_147.d	(01/12/17 00:00:00)	Sa_FECES-M3-j3-exp3-Plasma_BA_147	baplasma3	228	Sa_FECES-M3-j3-exp3-plasma_GCMRM_147.D	(01/21/17 00:00:00)	Sa_FECES-M3-j3-exp3-plasma_147	gcplasma3	225
AKKERMANSIA-j7-exp3-plasma_177	Sa_AKKERMANSIA-M3-j7-exp3-plasma_SF_177.d	(03/16/17 00:00:00)	Sa_AKKERMANSIA-M3-j7-exp3-plasma_SF_177	sfplasma3	223	Sa_AKKERMANSIA-M3-j7-exp3-plasma_PA_177.d	(03/22/17 00:00:00)	Sa_AKKERMANSIA-M3-j7-exp3-plasma_PA_177	paplasma3	52	Sa_AKKERMANSIA-M3-j7-exp3-Plasma_BA_177.d	(01/12/17 00:00:00)	Sa_AKKERMANSIA-M3-j7-exp3-Plasma_BA_177	baplasma3	229	Sa_AKKERMANSIA-M3-j7-exp3-plasma_GCMRM_177.D	(01/21/17 00:00:00)	Sa_AKKERMANSIA-M3-j7-exp3-plasma_177	gcplasma3	226
ATB-j3-exp3-plasma_142	Sa_ATB-M4-j3-exp3-plasma_SF_142.d	(03/16/17 00:00:00)	Sa_ATB-M4-j3-exp3-plasma_SF_142	sfplasma3	224	Sa_ATB-M4-j3-exp3-plasma_PA_142.d	(03/22/17 00:00:00)	Sa_ATB-M4-j3-exp3-plasma_PA_142	paplasma3	53	Sa_ATB-M4-j3-exp3-Plasma_BA_142.d	(01/12/17 00:00:00)	Sa_ATB-M4-j3-exp3-Plasma_BA_142	baplasma3	230	Sa_ATB-M4-j3-exp3-plasma_GCMRM_142.D	(01/21/17 00:00:00)	Sa_ATB-M4-j3-exp3-plasma_142	gcplasma3	227
AKKERMANSIA-j14-exp3-plasma_198	Sa_AKKERMANSIA-M6-j14-exp3-plasma_SF_198.d	(03/16/17 00:00:00)	Sa_AKKERMANSIA-M6-j14-exp3-plasma_SF_198	sfplasma3	225	Sa_AKKERMANSIA-M6-j14-exp3-plasma_PA_198.d	(03/22/17 00:00:00)	Sa_AKKERMANSIA-M6-j14-exp3-plasma_PA_198	paplasma3	54	Sa_AKKERMANSIA-M6-j14-exp3-Plasma_BA_198.d	(01/12/17 00:00:00)	Sa_AKKERMANSIA-M6-j14-exp3-Plasma_BA_198	baplasma3	231	Sa_AKKERMANSIA-M6-j14-exp3-plasma_GCMRM_198.D	(01/21/17 00:00:00)	Sa_AKKERMANSIA-M6-j14-exp3-plasma_198	gcplasma3	228
FECES-j7-exp3-plasma_174	Sa_FECES-M6-j7-exp3-plasma_SF_174.d	(03/16/17 00:00:00)	Sa_FECES-M6-j7-exp3-plasma_SF_174	sfplasma3	226	Sa_FECES-M6-j7-exp3-plasma_PA_174.d	(03/22/17 00:00:00)	Sa_FECES-M6-j7-exp3-plasma_PA_174	paplasma3	55	Sa_FECES-M6-j7-exp3-Plasma_BA_174.d	(01/12/17 00:00:00)	Sa_FECES-M6-j7-exp3-Plasma_BA_174	baplasma3	232	Sa_FECES-M6-j7-exp3-plasma_GCMRM_174.D	(01/21/17 00:00:00)	Sa_FECES-M6-j7-exp3-plasma_174	gcplasma3	229
ATB-j14-exp3-plasma_183	Sa_ATB-M3-j14-exp3-plasma_SF_183.d	(03/16/17 00:00:00)	Sa_ATB-M3-j14-exp3-plasma_SF_183	sfplasma3	227	Sa_ATB-M3-j14-exp3-plasma_PA_183.d	(03/22/17 00:00:00)	Sa_ATB-M3-j14-exp3-plasma_PA_183	paplasma3	56	Sa_ATB-M3-j14-exp3-Plasma_BA_183.d	(01/12/17 00:00:00)	Sa_ATB-M3-j14-exp3-Plasma_BA_183	baplasma3	233	Sa_ATB-M3-j14-exp3-plasma_GCMRM_183.D	(01/21/17 00:00:00)	Sa_ATB-M3-j14-exp3-plasma_183	gcplasma3	230
Nacl-j7-exp3-plasma_162	Sa_Nacl-M6-j7-exp3-plasma_SF_162.d	(03/16/17 00:00:00)	Sa_Nacl-M6-j7-exp3-plasma_SF_162	sfplasma3	228	Sa_Nacl-M6-j7-exp3-plasma_PA_162.d	(03/22/17 00:00:00)	Sa_Nacl-M6-j7-exp3-plasma_PA_162	paplasma3	57	Sa_Nacl-M6-j7-exp3-Plasma_BA_162.d	(01/12/17 00:00:00)	Sa_Nacl-M6-j7-exp3-Plasma_BA_162	baplasma3	234	Sa_Nacl-M6-j7-exp3-plasma_GCMRM_162.D	(01/21/17 00:00:00)	Sa_Nacl-M6-j7-exp3-plasma_162	gcplasma3	231
AKKERMANSIA-j3-exp3-plasma_153	Sa_AKKERMANSIA-M3-j3-exp3-plasma_SF_153.d	(03/16/17 00:00:00)	Sa_AKKERMANSIA-M3-j3-exp3-plasma_SF_153	sfplasma3	229	Sa_AKKERMANSIA-M3-j3-exp3-plasma_PA_153.d	(03/22/17 00:00:00)	Sa_AKKERMANSIA-M3-j3-exp3-plasma_PA_153	paplasma3	58	Sa_AKKERMANSIA-M3-j3-exp3-Plasma_BA_153.d	(01/12/17 00:00:00)	Sa_AKKERMANSIA-M3-j3-exp3-Plasma_BA_153	baplasma3	235	Sa_AKKERMANSIA-M3-j3-exp3-plasma_GCMRM_153.D	(01/21/17 00:00:00)	Sa_AKKERMANSIA-M3-j3-exp3-plasma_153	gcplasma3	232
ATB-j7-exp3-plasma_163	Sa_ATB-M1-j7-exp3-plasma_SF_163.d	(03/16/17 00:00:00)	Sa_ATB-M1-j7-exp3-plasma_SF_163	sfplasma3	230	Sa_ATB-M1-j7-exp3-plasma_PA_163.d	(03/22/17 00:00:00)	Sa_ATB-M1-j7-exp3-plasma_PA_163	paplasma3	59	Sa_ATB-M1-j7-exp3-Plasma_BA_163.d	(01/12/17 00:00:00)	Sa_ATB-M1-j7-exp3-Plasma_BA_163	baplasma3	236	Sa_ATB-M1-j7-exp3-plasma_GCMRM_163.D	(01/21/17 00:00:00)	Sa_ATB-M1-j7-exp3-plasma_163	gcplasma3	233
FECES-j14-exp3-plasma_187	Sa_FECES-M1-j14-exp3-plasma_SF_187.d	(03/16/17 00:00:00)	Sa_FECES-M1-j14-exp3-plasma_SF_187	sfplasma3	231	Sa_FECES-M1-j14-exp3-plasma_PA_187.d	(03/22/17 00:00:00)	Sa_FECES-M1-j14-exp3-plasma_PA_187	paplasma3	60	Sa_FECES-M1-j14-exp3-Plasma_BA_187.d	(01/12/17 00:00:00)	Sa_FECES-M1-j14-exp3-Plasma_BA_187	baplasma3	237	Sa_FECES-M1-j14-exp3-plasma_GCMRM_187.D	(01/21/17 00:00:00)	Sa_FECES-M1-j14-exp3-plasma_187	gcplasma3	234
Nacl-j3-exp3-plasma_133	Sa_Nacl-M1-j3-exp3-plasma_SF_133.d	(03/16/17 00:00:00)	Sa_Nacl-M1-j3-exp3-plasma_SF_133	sfplasma3	232	Sa_Nacl-M1-j3-exp3-plasma_PA_133.d	(03/22/17 00:00:00)	Sa_Nacl-M1-j3-exp3-plasma_PA_133	paplasma3	61	Sa_Nacl-M1-j3-exp3-Plasma_BA_133.d	(01/12/17 00:00:00)	Sa_Nacl-M1-j3-exp3-Plasma_BA_133	baplasma3	238	Sa_Nacl-M1-j3-exp3-plasma_GCMRM_133.D	(01/21/17 00:00:00)	Sa_Nacl-M1-j3-exp3-plasma_133	gcplasma3	235
ATB-j14-exp2-plasma_181	-	(NA NA)	-	-	-	Sa_ATB-M1-j14-exp2-plasma_PA_181.d	(03/25/17 00:00:00)	Sa_ATB-M1-j14-exp2-plasma_PA_181	paplasma2	244	Sa_ATB-M1-j14-exp2-Plasma_BA_181.d	(01/12/17 00:00:00)	Sa_ATB-M1-j14-exp2-Plasma_BA_181	baplasma2	168	Sa_ATB-M1-j14-exp2-Plasma_GCMRM_181.D	(01/18/17 00:00:00)	Sa_ATB-M1-j14-exp2-Plasma_181	gcplasma2	168
ATB-j14-exp3-plasma_186	Sa_ATB-M6-j14-exp3-plasma_SF_186.d	(03/16/17 00:00:00)	Sa_ATB-M6-j14-exp3-plasma_SF_186	sfplasma3	234	Sa_ATB-M6-j14-exp3-plasma_PA_186.d	(03/22/17 00:00:00)	Sa_ATB-M6-j14-exp3-plasma_PA_186	paplasma3	63	Sa_ATB-M6-j14-exp3-Plasma_BA_186.d	(01/12/17 00:00:00)	Sa_ATB-M6-j14-exp3-Plasma_BA_186	baplasma3	240	Sa_ATB-M6-j14-exp3-plasma_GCMRM_186.D	(01/21/17 00:00:00)	Sa_ATB-M6-j14-exp3-plasma_186	gcplasma3	237
AKKERMANSIA-j7-exp3-plasma_179	Sa_AKKERMANSIA-M5-j7-exp3-plasma_SF_179.d	(03/16/17 00:00:00)	Sa_AKKERMANSIA-M5-j7-exp3-plasma_SF_179	sfplasma3	235	Sa_AKKERMANSIA-M5-j7-exp3-plasma_PA_179.d	(03/22/17 00:00:00)	Sa_AKKERMANSIA-M5-j7-exp3-plasma_PA_179	paplasma3	64	Sa_AKKERMANSIA-M5-j7-exp3-Plasma_BA_179.d	(01/12/17 00:00:00)	Sa_AKKERMANSIA-M5-j7-exp3-Plasma_BA_179	baplasma3	241	Sa_AKKERMANSIA-M5-j7-exp3-plasma_GCMRM_179.D	(01/21/17 00:00:00)	Sa_AKKERMANSIA-M5-j7-exp3-plasma_179	gcplasma3	238
FECES-j3-exp3-plasma_145	Sa_FECES-M1-j3-exp3-plasma_SF_145.d	(03/16/17 00:00:00)	Sa_FECES-M1-j3-exp3-plasma_SF_145	sfplasma3	236	Sa_FECES-M1-j3-exp3-plasma_PA_145.d	(03/22/17 00:00:00)	Sa_FECES-M1-j3-exp3-plasma_PA_145	paplasma3	65	Sa_FECES-M1-j3-exp3-Plasma_BA_145.d	(01/12/17 00:00:00)	Sa_FECES-M1-j3-exp3-Plasma_BA_145	baplasma3	242	Sa_FECES-M1-j3-exp3-plasma_GCMRM_145.D	(01/21/17 00:00:00)	Sa_FECES-M1-j3-exp3-plasma_145	gcplasma3	239
ATB-j7-exp3-plasma_168	Sa_ATB-M6-j7-exp3-plasma_SF_168.d	(03/16/17 00:00:00)	Sa_ATB-M6-j7-exp3-plasma_SF_168	sfplasma3	237	Sa_ATB-M6-j7-exp3-plasma_PA_168.d	(03/22/17 00:00:00)	Sa_ATB-M6-j7-exp3-plasma_PA_168	paplasma3	66	Sa_ATB-M6-j7-exp3-Plasma_BA_168.d	(01/12/17 00:00:00)	Sa_ATB-M6-j7-exp3-Plasma_BA_168	baplasma3	243	Sa_ATB-M6-j7-exp3-plasma_GCMRM_168.D	(01/21/17 00:00:00)	Sa_ATB-M6-j7-exp3-plasma_168	gcplasma3	240
Nacl-j7-exp3-plasma_161	Sa_Nacl-M5-j7-exp3-plasma_SF_161.d	(03/16/17 00:00:00)	Sa_Nacl-M5-j7-exp3-plasma_SF_161	sfplasma3	238	Sa_Nacl-M5-j7-exp3-plasma_PA_161.d	(03/22/17 00:00:00)	Sa_Nacl-M5-j7-exp3-plasma_PA_161	paplasma3	67	Sa_Nacl-M5-j7-exp3-Plasma_BA_161.d	(01/12/17 00:00:00)	Sa_Nacl-M5-j7-exp3-Plasma_BA_161	baplasma3	244	Sa_Nacl-M5-j7-exp3-plasma_GCMRM_161.D	(01/21/17 00:00:00)	Sa_Nacl-M5-j7-exp3-plasma_161	gcplasma3	241
FECES-j14-exp3-plasma_188	Sa_FECES-M2-j14-exp3-plasma_SF_188.d	(03/16/17 00:00:00)	Sa_FECES-M2-j14-exp3-plasma_SF_188	sfplasma3	239	Sa_FECES-M2-j14-exp3-plasma_PA_188.d	(03/22/17 00:00:00)	Sa_FECES-M2-j14-exp3-plasma_PA_188	paplasma3	68	Sa_FECES-M2-j14-exp3-Plasma_BA_188.d	(01/12/17 00:00:00)	Sa_FECES-M2-j14-exp3-Plasma_BA_188	baplasma3	245	Sa_FECES-M2-j14-exp3-plasma_GCMRM_188.D	(01/21/17 00:00:00)	Sa_FECES-M2-j14-exp3-plasma_188	gcplasma3	242
ATB-j3-exp3-plasma_144	Sa_ATB-M6-j3-exp3-plasma_SF_144.d	(03/16/17 00:00:00)	Sa_ATB-M6-j3-exp3-plasma_SF_144	sfplasma3	240	Sa_ATB-M6-j3-exp3-plasma_PA_144.d	(03/22/17 00:00:00)	Sa_ATB-M6-j3-exp3-plasma_PA_144	paplasma3	69	Sa_ATB-M6-j3-exp3-Plasma_BA_144.d	(01/12/17 00:00:00)	Sa_ATB-M6-j3-exp3-Plasma_BA_144	baplasma3	246	Sa_ATB-M6-j3-exp3-plasma_GCMRM_144.D	(01/21/17 00:00:00)	Sa_ATB-M6-j3-exp3-plasma_144	gcplasma3	243
AKKERMANSIA-j3-exp3-plasma_156	Sa_AKKERMANSIA-M6-j3-exp3-plasma_SF_156.d	(03/16/17 00:00:00)	Sa_AKKERMANSIA-M6-j3-exp3-plasma_SF_156	sfplasma3	241	Sa_AKKERMANSIA-M6-j3-exp3-plasma_PA_156.d	(03/22/17 00:00:00)	Sa_AKKERMANSIA-M6-j3-exp3-plasma_PA_156	paplasma3	70	Sa_AKKERMANSIA-M6-j3-exp3-Plasma_BA_156.d	(01/12/17 00:00:00)	Sa_AKKERMANSIA-M6-j3-exp3-Plasma_BA_156	baplasma3	247	Sa_AKKERMANSIA-M6-j3-exp3-plasma_GCMRM_156.D	(01/21/17 00:00:00)	Sa_AKKERMANSIA-M6-j3-exp3-plasma_156	gcplasma3	244
FECES-j3-exp3-plasma_150	Sa_FECES-M6-j3-exp3-plasma_SF_150.d	(03/16/17 00:00:00)	Sa_FECES-M6-j3-exp3-plasma_SF_150	sfplasma3	242	Sa_FECES-M6-j3-exp3-plasma_PA_150.d	(03/22/17 00:00:00)	Sa_FECES-M6-j3-exp3-plasma_PA_150	paplasma3	71	Sa_FECES-M6-j3-exp3-Plasma_BA_150.d	(01/12/17 00:00:00)	Sa_FECES-M6-j3-exp3-Plasma_BA_150	baplasma3	248	Sa_FECES-M6-j3-exp3-plasma_GCMRM_150.D	(01/21/17 00:00:00)	Sa_FECES-M6-j3-exp3-plasma_150	gcplasma3	245
ATB-j14-exp3-plasma_181	Sa_ATB-M1-j14-exp3-plasma_SF_181.d	(03/16/17 00:00:00)	Sa_ATB-M1-j14-exp3-plasma_SF_181	sfplasma3	243	Sa_ATB-M1-j14-exp3-plasma_PA_181.d	(03/22/17 00:00:00)	Sa_ATB-M1-j14-exp3-plasma_PA_181	paplasma3	72	Sa_ATB-M1-j14-exp3-Plasma_BA_181.d	(01/12/17 00:00:00)	Sa_ATB-M1-j14-exp3-Plasma_BA_181	baplasma3	249	Sa_ATB-M1-j14-exp3-plasma_GCMRM_181.D	(01/21/17 00:00:00)	Sa_ATB-M1-j14-exp3-plasma_181	gcplasma3	246
AKKERMANSIA-j7-exp3-plasma_180	Sa_AKKERMANSIA-M6-j7-exp3-plasma_SF_180.d	(03/16/17 00:00:00)	Sa_AKKERMANSIA-M6-j7-exp3-plasma_SF_180	sfplasma3	244	Sa_AKKERMANSIA-M6-j7-exp3-plasma_PA_180.d	(03/22/17 00:00:00)	Sa_AKKERMANSIA-M6-j7-exp3-plasma_PA_180	paplasma3	73	Sa_AKKERMANSIA-M6-j7-exp3-Plasma_BA_180.d	(01/12/17 00:00:00)	Sa_AKKERMANSIA-M6-j7-exp3-Plasma_BA_180	baplasma3	250	Sa_AKKERMANSIA-M6-j7-exp3-plasma_GCMRM_180.D	(01/21/17 00:00:00)	Sa_AKKERMANSIA-M6-j7-exp3-plasma_180	gcplasma3	247
FECES-j14-exp3-plasma_189	Sa_FECES-M3-j14-exp3-plasma_SF_189.d	(03/16/17 00:00:00)	Sa_FECES-M3-j14-exp3-plasma_SF_189	sfplasma3	245	Sa_FECES-M3-j14-exp3-plasma_PA_189.d	(03/22/17 00:00:00)	Sa_FECES-M3-j14-exp3-plasma_PA_189	paplasma3	74	Sa_FECES-M3-j14-exp3-Plasma_BA_189.d	(01/12/17 00:00:00)	Sa_FECES-M3-j14-exp3-Plasma_BA_189	baplasma3	251	Sa_FECES-M3-j14-exp3-plasma_GCMRM_189.D	(01/21/17 00:00:00)	Sa_FECES-M3-j14-exp3-plasma_189	gcplasma3	248
St_SCFA-exp2-plasma_pre	St_SCFA-exp2-plasma_SF_2a.d	(03/10/17 00:00:00)	St_SCFA-exp2-plasma_SF_2a	sfplasma2	1	-	(NA NA)	-	-	-	-	(NA NA)	-	-	-	-	(NA NA)	-	-	-
St_PA-exp3-plasma_pre	-	(NA NA)	-	-	-	St_PA-exp3-plasma_PA_2a.d	(03/19/17 00:00:00)	St_PA-exp3-plasma_PA_2a	paplasma3	1	-	(NA NA)	-	-	-	-	(NA NA)	-	-	-
St_BA1-exp1-plasma_pre	-	(NA NA)	-	-	-	-	(NA NA)	-	-	-	St_BA1-exp1-plasma_BA_2a.d	(01/09/17 00:00:00)	St_BA1-exp1-plasma_BA_2a	baplasma1	1	-	(NA NA)	-	-	-
St_AA-exp1-plasma_pre	-	(NA NA)	-	-	-	-	(NA NA)	-	-	-	-	(NA NA)	-	-	-	St_AA-exp1-plasma_GCMRM_3a.D	(01/09/17 00:00:00)	St_AA-exp1-plasma_3a	gcplasma1	1
St_BA2-exp1-plasma_pre	-	(NA NA)	-	-	-	-	(NA NA)	-	-	-	St_BA2-exp1-plasma_BA_3a.d	(01/09/17 00:00:00)	St_BA2-exp1-plasma_BA_3a	baplasma1	2	-	(NA NA)	-	-	-
St_SCFA-exp2-plasma_post	St_SCFA-exp2-plasma_SF_2c.d	(03/10/17 00:00:00)	St_SCFA-exp2-plasma_SF_2c	sfplasma2	76	-	(NA NA)	-	-	-	-	(NA NA)	-	-	-	-	(NA NA)	-	-	-
St_SCFA1-exp1-plasma_pre	St_SCFA1-exp1-plasma_SF_3a.d	(03/13/17 00:00:00)	St_SCFA1-exp1-plasma_SF_3a	sfplasma1	77	-	(NA NA)	-	-	-	-	(NA NA)	-	-	-	-	(NA NA)	-	-	-
St_PA-exp3-plasma_post	-	(NA NA)	-	-	-	St_PA_exp3-plasma_PA_2c.d	(03/22/17 00:00:00)	St_PA_exp3-plasma_PA_2c	paplasma3	77	-	(NA NA)	-	-	-	-	(NA NA)	-	-	-
St_PA-exp1-plasma_pre	-	(NA NA)	-	-	-	St_PA-exp1-plasma_PA_2a.d	(03/22/17 00:00:00)	St_PA-exp1-plasma_PA_2a	paplasma1	78	-	(NA NA)	-	-	-	-	(NA NA)	-	-	-
St_BA2-exp1-plasma_post	-	(NA NA)	-	-	-	-	(NA NA)	-	-	-	St_BA2-exp1-plasma_BA_3b.d	(01/12/17 00:00:00)	St_BA2-exp1-plasma_BA_3b	baplasma1	93	-	(NA NA)	-	-	-
St_BA1-exp1-plasma_post	-	(NA NA)	-	-	-	-	(NA NA)	-	-	-	St_BA1-exp1-plasma_BA_2b.d	(01/12/17 00:00:00)	St_BA1-exp1-plasma_BA_2b	baplasma1	94	-	(NA NA)	-	-	-
St_BA1-exp2-plasma_pre	-	(NA NA)	-	-	-	-	(NA NA)	-	-	-	St_BA1-exp2-plasma_BA_2a.d	(01/12/17 00:00:00)	St_BA1-exp2-plasma_BA_2a	baplasma2	95	-	(NA NA)	-	-	-
St_BA2-exp2-plasma_pre	-	(NA NA)	-	-	-	-	(NA NA)	-	-	-	St_BA2-exp2-plasma_BA_3a.d	(01/12/17 00:00:00)	St_BA2-exp2-plasma_BA_3a	baplasma2	96	-	(NA NA)	-	-	-
St_AA-exp1-plasma_post	-	(NA NA)	-	-	-	-	(NA NA)	-	-	-	-	(NA NA)	-	-	-	St_AA-exp1-plasma_GCMRM_3b.D	(01/15/17 00:00:00)	St_AA-exp1-plasma_3b	gcplasma1	96
St_AA_exp2-plasma_pre	-	(NA NA)	-	-	-	-	(NA NA)	-	-	-	-	(NA NA)	-	-	-	St_AA_exp2-plasma_GCMRM_3a.D	(01/18/17 00:00:00)	St_AA_exp2-plasma_3a	gcplasma2	97
St_SCFA1-exp1-plasma_post	St_SCFA1-exp1-plasma_SF_4b.d	(03/16/17 00:00:00)	St_SCFA1-exp1-plasma_SF_4b	sfplasma1	171	-	(NA NA)	-	-	-	-	(NA NA)	-	-	-	-	(NA NA)	-	-	-
St_SCFA-exp3-plasma_pre	St_SCFA-exp3-plasma_SF_2a.d	(03/16/17 00:00:00)	St_SCFA-exp3-plasma_SF_2a	sfplasma3	172	-	(NA NA)	-	-	-	-	(NA NA)	-	-	-	-	(NA NA)	-	-	-
St_PA-exp1-plasma_post	-	(NA NA)	-	-	-	St_PA-exp1-plasma_PA_2c.d	(03/22/17 00:00:00)	St_PA-exp1-plasma_PA_2c	paplasma1	172	-	(NA NA)	-	-	-	-	(NA NA)	-	-	-
St_PA-exp2-plasma_pre	-	(NA NA)	-	-	-	St_PA-exp2-plasma_PA_2a.d	(03/22/17 00:00:00)	St_PA-exp2-plasma_PA_2a	paplasma2	173	-	(NA NA)	-	-	-	-	(NA NA)	-	-	-
St_BA2-exp2-plasma_post	-	(NA NA)	-	-	-	-	(NA NA)	-	-	-	St_BA2-exp2-plasma_BA_3b.d	(01/12/17 00:00:00)	St_BA2-exp2-plasma_BA_3b	baplasma2	174	-	(NA NA)	-	-	-
St_AA_exp2-plasma_post	-	(NA NA)	-	-	-	-	(NA NA)	-	-	-	-	(NA NA)	-	-	-	St_AA_exp2-plasma_GCMRM_3b.D	(01/21/17 00:00:00)	St_AA_exp2-plasma_3b	gcplasma2	174
St_BA1-exp2-plasma_post	-	(NA NA)	-	-	-	-	(NA NA)	-	-	-	St_BA1-exp2-plasma_BA_2b.d	(01/12/17 00:00:00)	St_BA1-exp2-plasma_BA_2b	baplasma2	175	-	(NA NA)	-	-	-
St_AA_exp3-plasma_pre	-	(NA NA)	-	-	-	-	(NA NA)	-	-	-	-	(NA NA)	-	-	-	St_AA_exp3-plasma_GCMRM_3a.D	(01/21/17 00:00:00)	St_AA_exp3-plasma_3a	gcplasma3	175
St_BA1-exp3-plasma_pre	-	(NA NA)	-	-	-	-	(NA NA)	-	-	-	St_BA1-exp3-plasma_BA_2a.d	(01/12/17 00:00:00)	St_BA1-exp3-plasma_BA_2a	baplasma3	176	-	(NA NA)	-	-	-
St_BA2-exp3-plasma_pre	-	(NA NA)	-	-	-	-	(NA NA)	-	-	-	St_BA2-exp3-plasma_BA_3a.d	(01/12/17 00:00:00)	St_BA2-exp3-plasma_BA_3a	baplasma3	177	-	(NA NA)	-	-	-
St_SCFA_exp3-plasma_post	St_SCFA_exp3-plasma_SF_2c.d	(03/16/17 00:00:00)	St_SCFA_exp3-plasma_SF_2c	sfplasma3	248	-	(NA NA)	-	-	-	-	(NA NA)	-	-	-	-	(NA NA)	-	-	-
St_PA-exp2-plasma_post	-	(NA NA)	-	-	-	St_PA-exp2-plasma_PA_2c.d	(03/25/17 00:00:00)	St_PA-exp2-plasma_PA_2c	paplasma2	249	-	(NA NA)	-	-	-	-	(NA NA)	-	-	-
St_AA_exp3-plasma_post	-	(NA NA)	-	-	-	-	(NA NA)	-	-	-	-	(NA NA)	-	-	-	St_AA_exp3-plasma_GCMRM_3b.D	(01/21/17 00:00:00)	St_AA_exp3-plasma_3b	gcplasma3	252
St_BA2-exp3-plasma_post	-	(NA NA)	-	-	-	-	(NA NA)	-	-	-	St_BA2-exp3-plasma_BA_3b.d	(01/12/17 00:00:00)	St_BA2-exp3-plasma_BA_3b	baplasma3	255	-	(NA NA)	-	-	-
St_BA1-exp3-plasma_post	-	(NA NA)	-	-	-	-	(NA NA)	-	-	-	St_BA1-exp3-plasma_BA_2b.d	(01/12/17 00:00:00)	St_BA1-exp3-plasma_BA_2b	baplasma3	256	-	(NA NA)	-	-	-

## Sheet: VarInfos
Analyte	MetName	IsSTD	IsISO	RT	LevelAnnot	OriginalName	Class	MF	Mass	HMDB	KEGG	PC	Chebi	OGName	PCu	Method	SBR	myQC_CV_AreaQCCorr_2	myQC_Sum_SBR>5	myQC_Sum_Height>0	Analyte.sfplasma1	Analyte.sfplasma2	Analyte.sfplasma3	Analyte.paplasma1	Analyte.paplasma2	Analyte.paplasma3	Analyte.baplasma1	Analyte.baplasma2	Analyte.baplasma3	Analyte.gcplasma1	Analyte.gcplasma2	Analyte.gcplasma3
12-dehydrocholic acid@5.34-ba	12-dehydrocholic acid	FALSE	FALSE	5.343	1	12-dehydrocholic acid	Steroids	C24H38O5	406.272	HMDB00400	C01292	94235	-	12-dehydrocholic acid	94235	ba	10	12.88	10	10	-	-	-	-	-	-	12-dehydrocholic acid@5.31-ba	12-dehydrocholic acid@5.36-ba	12-dehydrocholic acid@5.39-ba	-	-	-
2-aminoadipic acid@15.25-gc	2-aminoadipic acid	FALSE	FALSE	15.249	1	2-aminoadipic_acid	Amino acids	C6H11NO4	161.069	HMDB00510	C00956	469;59366488;92136	chebiId:37023	2-aminoadipic acid	469	gc	100	7.636	9	9	-	-	-	-	-	-	-	-	-	2-aminoadipic acid@15.26-gc	2-aminoadipic acid@15.25-gc	2-aminoadipic acid@15.25-gc
2-hydroxy-2-methylbutyric acid@3.43-sf	2-hydroxy-2-methylbutyric acid	FALSE	FALSE	3.427	1	2-hydroxy-2-methylbutyric_acid	Fatty Acyls	C5H10O3	118.063	-	-	95433	-	2-hydroxy-2-methylbutyric acid	95433	sf	100	7.449	0	8	2-hydroxy-2-methylbutyric acid@3.43-sf	2-hydroxy-2-methylbutyric acid@3.49-sf	2-hydroxy-2-methylbutyric acid@3.40-sf	-	-	-	-	-	-	-	-	-
2-hydroxy-3-methylbutyric acid@4.53-sf	2-hydroxy-3-methylbutyric acid	FALSE	FALSE	4.53	1	2-hydroxy-3-methylbutyric_acid	Fatty Acyls	C5H10O3	118.063	-	-	5289545	-	2-hydroxy-2-methylbutyric acid	5289545	sf	100	1.266	8	8	2-hydroxy-3-methylbutyric acid@4.53-sf	2-hydroxy-3-methylbutyric acid@4.62-sf	2-hydroxy-3-methylbutyric acid@4.48-sf	-	-	-	-	-	-	-	-	-
2-hydroxybutyric acid@2.47-sf	2-hydroxybutyric acid	FALSE	FALSE	2.468	1	2-hydroxybutyric_acid	Organic acids	C4H8O3	104.047	HMDB00008	C05984	440864;11266	chebiId:1148;chebiId:50613	2-hydroxybutyric acid	11266	sf	100	4.001	8	8	2-hydroxybutyric acid@2.47-sf	2-hydroxybutyric acid@2.51-sf	2-hydroxybutyric acid@2.45-sf	-	-	-	-	-	-	-	-	-
2-hydroxyglutaric acid@13.02-gc	2-hydroxyglutaric acid	FALSE	FALSE	13.019	1	2-hydroxyglutaric_acid	Organic acids	C5H8O5	148.037	HMDB00606;HMDB59655	C02630;C01087	43	chebiId:17084	2-hydroxyglutaric acid	43	gc	877	6.047	9	9	-	-	-	-	-	-	-	-	-	2-hydroxyglutaric acid@13.03-gc	2-hydroxyglutaric acid@13.02-gc	2-hydroxyglutaric acid@13.02-gc
2-oxoglutaric acid@13.03-gc	2-oxoglutaric acid	FALSE	FALSE	13.026	1	2-oxoglutaric_acid	Organic acids	C5H6O5	146.022	HMDB00208	C00026	51	chebiId:30915	2-oxoglutaric acid	51	gc	100	5.166	9	9	-	-	-	-	-	-	-	-	-	2-oxoglutaric acid@13.03-gc	2-oxoglutaric acid@13.03-gc	2-oxoglutaric acid@13.02-gc
2-oxovaleric acid@14.60-sf	2-oxovaleric acid	FALSE	FALSE	14.599	1	2-oxovaleric_acid	-	-	-	-	-	-	-	-	-	sf	1043	10.75	3	8	2-oxovaleric acid@14.60-sf	2-oxovaleric acid@14.61-sf	2-oxovaleric acid@14.60-sf	-	-	-	-	-	-	-	-	-
3-hydroxybutyric acid@1.66-sf	3-hydroxybutyric acid	FALSE	FALSE	1.659	1	3-hydroxybutyric_acid	Organic acids	C4H8O3	104.047	HMDB00357;HMDB00011	C01089	441;92135	chebiId:10983;chebiId:17066;chebiId:20067	3-hydroxybutyric acid	441	sf	100	1.539	8	8	3-hydroxybutyric acid@1.66-sf	3-hydroxybutyric acid@1.68-sf	3-hydroxybutyric acid@1.64-sf	-	-	-	-	-	-	-	-	-
3-hydroxyisovaleric acid@7.83-gc	3-hydroxyisovaleric acid	FALSE	FALSE	7.835	1	3-hydroxyisovaleric_acid	Fatty Acyls	C5H10O3	118.063	HMDB00754	-	69362	chebiId:37084	3-hydroxyisovaleric acid	69362	gc	2613	7.918	0	9	-	-	-	-	-	-	-	-	-	3-hydroxyisovaleric acid@7.84-gc	3-hydroxyisovaleric acid@7.83-gc	3-hydroxyisovaleric acid@7.83-gc
4-hydroxymandelic acid@15.24-gc	4-hydroxymandelic acid	FALSE	FALSE	15.236	1	4-hydroxymandelic_acid	Unclassified	C8H8O4	168.042	HMDB00822	C11527	328	chebiId:16388	4-hydroxymandelic acid	328	gc	100	8.911	9	9	-	-	-	-	-	-	-	-	-	4-hydroxymandelic acid@15.24-gc	4-hydroxymandelic acid@15.24-gc	4-hydroxymandelic acid@15.23-gc
4-hydroxyproline@12.45-gc	4-hydroxyproline	FALSE	FALSE	12.454	1	4-hydroxyproline	Amino acids	C5H9NO3	131.058	HMDB00725	C01157	825;5810;5238478	chebiId:18095	4-hydroxyproline	5238478	gc	1534	5.344	9	9	-	-	-	-	-	-	-	-	-	4-hydroxyproline@12.45-gc	4-hydroxyproline@12.45-gc	4-hydroxyproline@12.45-gc
5-aminovaleric acid@13.54-gc	5-aminovaleric acid	FALSE	FALSE	13.537	1	5-aminovaleric_acid	Amino acids	C5H11NO2	117.079	HMDB03355	C00431	138;6992101	chebiId:15887	5-aminovaleric acid	138	gc	444	9.07	9	9	-	-	-	-	-	-	-	-	-	5-aminovaleric acid@13.54-gc	5-aminovaleric acid@13.54-gc	5-aminovaleric acid@13.53-gc
5-oxoproline@12.36-gc	5-oxoproline	FALSE	FALSE	12.362	1	5-oxoproline	Amino acids	C5H7NO3	129.043	HMDB00805;HMDB00267	C02237;C01879	439685;499;7405	chebiId:16010;chebiId:16924;chebiId:18183	5-oxoproline	499	gc	32648	4.192	9	9	-	-	-	-	-	-	-	-	-	5-oxoproline@12.37-gc	5-oxoproline@12.36-gc	5-oxoproline@12.36-gc
7,12-dihydroxy-3-oxocholanoic acid@6.49-ba	7,12-dihydroxy-3-oxocholanoic acid	FALSE	FALSE	6.485	1	3-dehydrocholic acid	Steroids	C24H38O5	406.272	-	-	5283956	-	Dehydrocholic acid	5283956	ba	80	22.086	10	10	-	-	-	-	-	-	7,12-dihydroxy-3-oxocholanoic acid@6.36-ba	7,12-dihydroxy-3-oxocholanoic acid@7.00-ba	7,12-dihydroxy-3-oxocholanoic acid@6.52-ba	-	-	-
Acetic acid@1.78-sf	Acetic acid	FALSE	FALSE	1.783	1	Acetic_acid	Organic acids	C2H4O2	60.021	HMDB00042	C00033	176;21980959	chebiId:15366	Acetic acid	176	sf	626	2.042	0	8	Acetic acid@1.78-sf	Acetic acid@1.80-sf	Acetic acid@1.77-sf	-	-	-	-	-	-	-	-	-
Adenine@16.20-gc	Adenine	FALSE	FALSE	16.197	1	Adenine	Bases	C5H5N5	135.054	HMDB00034	C00147	190	chebiId:16708	Adenine	190	gc	329	22.277	9	9	-	-	-	-	-	-	-	-	-	Adenine@16.21-gc	Adenine@16.20-gc	Adenine@16.19-gc
Alanine@6.92-gc	Alanine	FALSE	FALSE	6.923	1	Alanine	Amino acids	C3H7NO2	89.048	HMDB01310;HMDB00161	C00133;C00041	71080;602;5950;7311724;57383916	chebiId:15570;chebiId:16977	Alanine	57383916	gc	185777	7.841	9	9	-	-	-	-	-	-	-	-	-	Alanine@6.93-gc	Alanine@6.92-gc	Alanine@6.92-gc
Allantoin@16.56-gc	Allantoin	FALSE	FALSE	16.559	1	Allantoin	Organic acids	C4H6N4O3	158.044	HMDB00462	C02350;C01551	204;439714	chebiId:15678	Allantoin	204	gc	100	15.119	9	9	-	-	-	-	-	-	-	-	-	Allantoin@16.57-gc	Allantoin@16.56-gc	Allantoin@16.55-gc
Alpha-muricholic acid@5.94-ba	Alpha-muricholic acid	FALSE	FALSE	5.938	1	Alpha-muricholic acid	Steroids	C24H40O5	408.288	HMDB00506	C17647	5283852;3083761	chebiId:81243	Alpha-muricholic acid	3083761	ba	42	12.42	10	10	-	-	-	-	-	-	Alpha-muricholic acid@5.88-ba	Alpha-muricholic acid@5.94-ba	Alpha-muricholic acid@5.97-ba	-	-	-
Alpha-tocopherol@29.53-gc	Alpha-tocopherol	FALSE	FALSE	29.534	1	Alpha-tocopherol	Prenols	C29H50O2	430.381	HMDB01893	C02477	14985;2116	chebiId:18145	Alpha-tocopherol	2116	gc	100	11.021	9	9	-	-	-	-	-	-	-	-	-	Alpha-tocopherol@29.54-gc	Alpha-tocopherol@29.53-gc	Alpha-tocopherol@29.52-gc
Anthranilic acid@13.44-gc	Anthranilic acid	FALSE	FALSE	13.439	1	Anthranilic_acid	Unclassified	C7H7NO2	137.048	HMDB01123	C00108	227;3734162	chebiId:30754	Anthranilic acid	227	gc	208	6.232	9	9	-	-	-	-	-	-	-	-	-	Anthranilic acid@13.44-gc	Anthranilic acid@13.44-gc	Anthranilic acid@13.43-gc
Arabinose@14.19-gc	Arabinose	FALSE	FALSE	14.186	1	Arabinose	Carbohydrates	C5H10O5	150.053	HMDB00646	C00216;C00259	66308;6902;439195	chebiId:17108;chebiId:46994	Arabinose	439195	gc	100	5.425	9	9	-	-	-	-	-	-	-	-	-	Arabinose@14.19-gc	Arabinose@14.19-gc	Arabinose@14.18-gc
Arabitol@14.83-gc	Arabitol	FALSE	FALSE	14.829	1	Arabitol	Carbohydrates	C5H12O5	152.068	HMDB01851;HMDB00568	C00532;C01904	439255;94154	chebiId:18403;chebiId:18333	Arabitol	439255	gc	100	13.298	9	9	-	-	-	-	-	-	-	-	-	Arabitol@14.84-gc	Arabitol@14.83-gc	Arabitol@14.83-gc
Arachidonic acid@23.77-gc	Arachidonic acid	FALSE	FALSE	23.771	1	Arachidonic_acid	Fatty Acyls	C20H32O2	304.24	HMDB01043	C00219	444899;231	chebiId:15843	Arachidonic acid	231	gc	1307	7.907	9	9	-	-	-	-	-	-	-	-	-	Arachidonic acid@23.78-gc	Arachidonic acid@23.77-gc	Arachidonic acid@23.77-gc
Asparagine@14.14-gc	Asparagine	FALSE	FALSE	14.137	1	Asparagine	Amino acids	C4H8N2O3	132.053	HMDB00168	C00152	236;6267;5247114	chebiId:17196	Asparagine	236	gc	100	9.456	9	9	-	-	-	-	-	-	-	-	-	Asparagine@14.15-gc	Asparagine@14.14-gc	Asparagine@14.14-gc
Aspartic acid@12.38-gc	Aspartic acid	FALSE	FALSE	12.381	1	Aspartic_acid	Amino acids	C4H7NO4	133.038	HMDB06483;HMDB00191	C00402;C00049	83887;5960;424;23443619;57397078	chebiId:17364;chebiId:17053	Aspartic acid	23443619	gc	1806	6.49	9	9	-	-	-	-	-	-	-	-	-	Aspartic acid@12.39-gc	Aspartic acid@12.38-gc	Aspartic acid@12.38-gc
Behenic acid@26.42-gc	Behenic acid	FALSE	FALSE	26.422	1	Behenic_acid	Fatty Acyls	C22H44O2	340.334	HMDB00944	C08281	8215	chebiId:23858;chebiId:28941	Behenic acid	8215	gc	984	11.904	0	9	-	-	-	-	-	-	-	-	-	Behenic acid@26.43-gc	Behenic acid@26.42-gc	Behenic acid@26.42-gc
Benzoic acid@8.77-gc	Benzoic acid	FALSE	FALSE	8.768	1	Benzoic_acid	Unclassified	C7H6O2	122.037	HMDB01870	C00180	243;20144841	chebiId:30746	Benzoic acid	20144841	gc	688319	7.493	0	9	-	-	-	-	-	-	-	-	-	Benzoic acid@8.77-gc	Benzoic acid@8.77-gc	Benzoic acid@8.76-gc
Beta-alanine@11.17-gc	Beta-alanine	FALSE	FALSE	11.171	1	Beta-alanine	Amino acids	C3H7NO2	89.048	HMDB00056	C00099	239;4755801	chebiId:16958	Beta-alanine	239	gc	2417	7.833	9	9	-	-	-	-	-	-	-	-	-	Beta-alanine@11.18-gc	Beta-alanine@11.17-gc	Beta-alanine@11.17-gc
Beta-hydroxypyruvic acid@5.46-gc	Beta-hydroxypyruvic acid	FALSE	FALSE	5.462	1	Beta-hydroxypyruvic acid	Organic acids	C3H4O4	104.011	HMDB01352	C00168	964	chebiId:30841	Beta-hydroxypyruvic acid	964	gc	2819969	20.731	0	9	-	-	-	-	-	-	-	-	-	Beta-hydroxypyruvic acid@5.47-gc	Beta-hydroxypyruvic acid@5.46-gc	Beta-hydroxypyruvic acid@5.46-gc
Beta-muricholic acid@6.22-ba	Beta-muricholic acid	FALSE	FALSE	6.224	1	Beta-muricholic acid	Steroids	C24H40O5	408.288	HMDB00415	C17726	5283853;3083762	chebiId:81298	Beta-muricholic acid	3083762	ba	10	16.417	10	10	-	-	-	-	-	-	Beta-muricholic acid@6.17-ba	Beta-muricholic acid@6.24-ba	Beta-muricholic acid@6.27-ba	-	-	-
Butanoic acid@5.21-sf	Butanoic acid	FALSE	FALSE	5.207	1	Butanoic_acid	Fatty Acyls	C4H8O2	88.052	HMDB00039	C00246	264	chebiId:30772	Butanoic acid	264	sf	114	4.359	8	8	Butanoic acid@5.21-sf	Butanoic acid@5.32-sf	Butanoic acid@5.14-sf	-	-	-	-	-	-	-	-	-
Cadaverine@4.64-pa	Cadaverine	FALSE	FALSE	4.642	1	Cadaverine	Unclassified	C5H14N2	102.116	HMDB02322	C01672	273	chebiId:18127	Cadaverine	273	pa	10	20.283	8	8	-	-	-	Cadaverine@4.64-pa	Cadaverine@4.63-pa	Cadaverine@4.66-pa	-	-	-	-	-	-
Capric acid@11.46-gc	Capric acid	FALSE	FALSE	11.456	1	Capric_acid	Fatty Acyls	C10H20O2	172.146	HMDB00511	C01571	2969	chebiId:30813	Capric acid	2969	gc	142258	4.642	0	9	-	-	-	-	-	-	-	-	-	Capric acid@11.46-gc	Capric acid@11.46-gc	Capric acid@11.45-gc
Caproic acid@12.05-sf	Caproic acid	FALSE	FALSE	12.047	1	Caproic_acid	Fatty Acyls	C6H12O2	116.084	HMDB00535	C01585	8892	chebiId:30776	Caproic acid	8892	sf	237	4.163	0	8	Caproic acid@12.05-sf	Caproic acid@12.08-sf	Caproic acid@12.00-sf	-	-	-	-	-	-	-	-	-
Caprylic acid@8.96-gc	Caprylic acid	FALSE	FALSE	8.96	1	Caprylic_acid	Fatty Acyls	C8H16O2	144.115	HMDB00482	C06423	379	chebiId:28837	Caprylic acid	379	gc	278565	4.645	0	9	-	-	-	-	-	-	-	-	-	Caprylic acid@8.96-gc	Caprylic acid@8.96-gc	Caprylic acid@8.95-gc
Chenodeoxycholic acid@10.31-ba	Chenodeoxycholic acid	FALSE	FALSE	10.306	1	Chenodeoxycholic acid	Steroids	C24H40O4	392.293	HMDB00518	C02528	10133	chebiId:16755	Chenodeoxycholic acid	10133	ba	34	9.151	10	10	-	-	-	-	-	-	Chenodeoxycholic acid@10.27-ba	Chenodeoxycholic acid@10.31-ba	Chenodeoxycholic acid@10.34-ba	-	-	-
Cholesterol@29.53-gc	Cholesterol	FALSE	FALSE	29.526	1	Cholesterol	Steroids	C27H46O	386.355	HMDB00067	C00187	6432564;5997	chebiId:16113	Cholesterol	5997	gc	326	4.995	9	9	-	-	-	-	-	-	-	-	-	Cholesterol@29.54-gc	Cholesterol@29.53-gc	Cholesterol@29.52-gc
Cholic acid@9.11-ba	Cholic acid	FALSE	FALSE	9.108	1	Cholic acid	Steroids	C24H40O5	408.288	HMDB00619	C00695;C01558	221493;303;439520	chebiId:16359;chebiId:22868;chebiId:3098	Cholic acid	303	ba	16	9.106	10	10	-	-	-	-	-	-	Cholic acid@9.08-ba	Cholic acid@9.12-ba	Cholic acid@9.13-ba	-	-	-
Citric acid;Isocitric acid@15.82-gc	Citric acid;Isocitric acid	FALSE	FALSE	15.824	1	Citric_acid__Isocitric_acid	Organic acids	C6H8O7	192.027	HMDB00094;HMDB00193	C00158;C00311	311;19782904;88113319;1198	chebiId:30769;chebiId:30887	Citric acid;Isocitric acid	19782904;1198	gc	8379	4.628	9	9	-	-	-	-	-	-	-	-	-	Citric acid;Isocitric acid@15.83-gc	Citric acid;Isocitric acid@15.82-gc	Citric acid;Isocitric acid@15.82-gc
Citrulline@15.79-gc	Citrulline	FALSE	FALSE	15.786	1	Citrulline	Amino acids	C6H13N3O3	175.096	HMDB00904	C00327	833;9750;25244873	chebiId:16349	Citrulline	25244873	gc	100	8.412	9	9	-	-	-	-	-	-	-	-	-	Citrulline@15.80-gc	Citrulline@15.79-gc	Citrulline@15.79-gc
Creatine@12.81-gc	Creatine	FALSE	FALSE	12.813	1	Creatine	Amino acids	C4H9N3O2	131.069	HMDB00064	C00300	586	chebiId:16919	Creatine	586	gc	219	8.894	9	9	-	-	-	-	-	-	-	-	-	Creatine@12.82-gc	Creatine@12.81-gc	Creatine@12.81-gc
Cystine;Cysteine@23.03-gc	Cystine;Cysteine	FALSE	FALSE	23.028	1	Cystine__Cysteine	Amino acids	C3H7NO2S;C6H12N2O4S2	180.522	HMDB00574;HMDB03417;HMDB00192	C00097;C00793;C00491	5862;594;92851;5260155;67678	chebiId:17561;chebiId:16375;chebiId:16283	Cysteine;Cystine	5260155;67678	gc	128	7.365	9	9	-	-	-	-	-	-	-	-	-	Cystine;Cysteine@23.04-gc	Cystine;Cysteine@23.03-gc	Cystine;Cysteine@23.02-gc
Cytosine@12.38-gc	Cytosine	FALSE	FALSE	12.381	1	Cytosine	Bases	C4H5N3O	111.043	HMDB00630	C00380	597	chebiId:16040	Cytosine	597	gc	205	8.698	9	9	-	-	-	-	-	-	-	-	-	Cytosine@12.39-gc	Cytosine@12.38-gc	Cytosine@12.38-gc
Deoxycholic acid@10.53-ba	Deoxycholic acid	FALSE	FALSE	10.53	1	Deoxycholic acid	Steroids	C24H40O4	392.293	HMDB00626	C11171;C04483	222528;2987;23668196	chebiId:9177;chebiId:28834	Deoxycholic acid	2987	ba	45	15.242	10	10	-	-	-	-	-	-	Deoxycholic acid@10.48-ba	Deoxycholic acid@10.53-ba	Deoxycholic acid@10.55-ba	-	-	-
Dimethylglycine@5.46-gc	Dimethylglycine	FALSE	FALSE	5.46	1	Dimethylglycine	Amino acids	C4H9NO2	103.063	HMDB00092	C01026	673	chebiId:17724	Dimethylglycine	673	gc	4988126	21.887	0	9	-	-	-	-	-	-	-	-	-	Dimethylglycine@5.46-gc	Dimethylglycine@5.46-gc	Dimethylglycine@5.46-gc
Erythritol@12.31-gc	Erythritol	FALSE	FALSE	12.31	1	Erythritol	Carbohydrates	C4H10O4	122.058	HMDB02994	C00503	222285;8998	chebiId:17113;chebiId:48299	Erythritol	8998	gc	100	4.756	9	9	-	-	-	-	-	-	-	-	-	Erythritol@12.31-gc	Erythritol@12.31-gc	Erythritol@12.30-gc
Ferulic acid@19.23-gc	Ferulic acid	FALSE	FALSE	19.232	1	Ferulic_acid	Flavonoids	C10H10O4	194.058	HMDB00537;HMDB00954	C01494	445858;709	chebiId:17620	Ferulic acid	445858	gc	100	14.478	9	9	-	-	-	-	-	-	-	-	-	Ferulic acid@19.23-gc	Ferulic acid@19.23-gc	Ferulic acid@19.20-gc
Fructose@16.50-gc	Fructose	FALSE	FALSE	16.5	1	Fructose	Carbohydrates	C6H12O6	180.063	HMDB00660	C00095;C02336	5984;439163;439709	chebiId:15824;chebiId:37721;chebiId:28645	Fructose	439163	gc	273	8.524	9	9	-	-	-	-	-	-	-	-	-	Fructose@16.51-gc	Fructose@16.50-gc	Fructose@16.50-gc
Fumaric acid@10.07-gc	Fumaric acid	FALSE	FALSE	10.073	1	Fumaric_acid	Organic acids	C4H4O4	116.011	HMDB00134	C00122	444972	chebiId:18012	Fumaric acid	444972	gc	12566	9.926	9	9	-	-	-	-	-	-	-	-	-	Fumaric acid@10.07-gc	Fumaric acid@10.07-gc	Fumaric acid@10.07-gc
GABA@12.45-gc	GABA	FALSE	FALSE	12.453	1	GABA	Amino acids	C4H9NO2	103.063	HMDB00112	C00334	119;6992099	chebiId:16865	GABA	119	gc	334	6.376	9	9	-	-	-	-	-	-	-	-	-	GABA@12.46-gc	GABA@12.45-gc	GABA@12.45-gc
Galactitol;Sorbitol;Mannitol@17.31-gc	Galactitol;Sorbitol;Mannitol	FALSE	FALSE	17.306	1	Galactitol__Sorbitol__Mannitol	Carbohydrates	C6H14O6	182.079	HMDB00107;HMDB00765;HMDB00247	C01697;C00392;C00794	11850;6251;5780	chebiId:16813;chebiId:16899;chebiId:17924	Galactitol;Mannitol;Sorbitol	11850;6251;5780	gc	418	11.812	9	9	-	-	-	-	-	-	-	-	-	Galactitol;Sorbitol;Mannitol@17.32-gc	Galactitol;Sorbitol;Mannitol@17.31-gc	Galactitol;Sorbitol;Mannitol@17.30-gc
Galactose;Glucose;Mannose@17.04-gc	Galactose;Glucose;Mannose	FALSE	FALSE	17.041	1	Galactose__Glucose__Mannose	Carbohydrates	C6H12O6	180.063	HMDB00143;HMDB33704;HMDB00122;HMDB03345;HMDB00516;HMDB00169	C00124;C01582;C00984;C01825;C00031;C00267;C00221;C00159	439357;6036;3037556;12003287;79025;5793;206;64689;161658;18950	chebiId:4139;chebiId:28061;chebiId:28260;chebiId:42905;chebiId:4167;chebiId:17925;chebiId:15903;chebiId:4208	Galactose;Glucose;Mannose	12003287;206;161658	gc	245	3.64	9	9	-	-	-	-	-	-	-	-	-	Galactose;Glucose;Mannose@17.05-gc	Galactose;Glucose;Mannose@17.04-gc	Galactose;Glucose;Mannose@17.03-gc
Glucose-6-phosphate;Fructose-6-phosphate@23.84-gc	Glucose-6-phosphate;Fructose-6-phosphate	FALSE	FALSE	23.844	1	Glucose-6-phosphate__Fructose-6-phosphate	Carbohydrates	C6H13O9P	260.03	HMDB00124;HMDB03971;HMDB01401;HMDB03498	C05345;C00085;C00668;C00092;C01172	69507;440641;439160;5958;208;439284;439427	chebiId:16084;chebiId:15946;chebiId:61553;chebiId:17665;chebiId:4170;chebiId:17719	Fructose-6-phosphate;Glucose-6-phosphate	439160;208	gc	100	8.41	9	9	-	-	-	-	-	-	-	-	-	Glucose-6-phosphate;Fructose-6-phosphate@23.85-gc	Glucose-6-phosphate;Fructose-6-phosphate@23.84-gc	Glucose-6-phosphate;Fructose-6-phosphate@23.83-gc
Glutamic acid@13.54-gc	Glutamic acid	FALSE	FALSE	13.54	1	Glutamic_acid	Amino acids	C5H9NO4	147.053	HMDB03339;HMDB00148	C00025;C00302;C00217	611;33032;57397101;23327	chebiId:16015;chebiId:15966;chebiId:18327	Glutamic acid	57397101	gc	7674	8.587	9	9	-	-	-	-	-	-	-	-	-	Glutamic acid@13.54-gc	Glutamic acid@13.54-gc	Glutamic acid@13.54-gc
Glutamine@15.25-gc	Glutamine	FALSE	FALSE	15.248	1	Glutamine	Amino acids	C5H10N2O3	146.069	HMDB00641;HMDB03423	C00064;C00819	5961;145815;25244553;738	chebiId:18050;chebiId:17061	Glutamine	25244553	gc	278	6.145	9	9	-	-	-	-	-	-	-	-	-	Glutamine@15.26-gc	Glutamine@15.25-gc	Glutamine@15.24-gc
Glyceric acid@9.97-gc	Glyceric acid	FALSE	FALSE	9.97	1	Glyceric_acid	Carbohydrates	C3H6O4	106.027	HMDB00139	C00258	752;439194	chebiId:32398	Glyceric acid	752	gc	6046	5.13	9	9	-	-	-	-	-	-	-	-	-	Glyceric acid@9.97-gc	Glyceric acid@9.97-gc	Glyceric acid@9.96-gc
Glycerol@9.21-gc	Glycerol	FALSE	FALSE	9.213	1	Glycerol	Carbohydrates	C3H8O3	92.047	HMDB00131	C00116	753	chebiId:17754	Glycerol	753	gc	202192	3.821	9	9	-	-	-	-	-	-	-	-	-	Glycerol@9.22-gc	Glycerol@9.21-gc	Glycerol@9.21-gc
Glycerol-3-phosphate@15.23-gc	Glycerol-3-phosphate	FALSE	FALSE	15.232	1	Glycerol-3-phosphate	Lipids	C3H9O6P	172.014	HMDB00126	C00093	754;439162	chebiId:15978	Glycerol-3-phosphate	754	gc	320	6.993	9	9	-	-	-	-	-	-	-	-	-	Glycerol-3-phosphate@15.24-gc	Glycerol-3-phosphate@15.23-gc	Glycerol-3-phosphate@15.23-gc
Glycine@9.62-gc	Glycine	FALSE	FALSE	9.622	1	Glycine	Amino acids	C2H5NO2	75.032	HMDB00123	C00037	750;5257127	chebiId:15428	Glycine	5257127	gc	7916	3.856	9	9	-	-	-	-	-	-	-	-	-	Glycine@9.62-gc	Glycine@9.62-gc	Glycine@9.62-gc
Glycocholic acid@5.84-ba	Glycocholic acid	FALSE	FALSE	5.837	1	Glycocholic acid	Steroids	C26H43NO6	465.309	HMDB00138	C01921	10140;23617285;755	chebiId:17687	Glycocholic acid	755	ba	68	10.413	0	10	-	-	-	-	-	-	Glycocholic acid@5.77-ba	Glycocholic acid@5.84-ba	Glycocholic acid@5.87-ba	-	-	-
Glycolic acid@6.26-gc	Glycolic acid	FALSE	FALSE	6.263	1	Glycolic_acid	Organic acids	C2H4O3	76.016	HMDB00115	C00160	757;3698251	chebiId:17497	Glycolic acid	3698251	gc	349284	4.112	0	9	-	-	-	-	-	-	-	-	-	Glycolic acid@6.27-gc	Glycolic acid@6.26-gc	Glycolic acid@6.26-gc
Heptanoic acid@13.86-sf	Heptanoic acid	FALSE	FALSE	13.86	1	Heptanoic_acid	Fatty Acyls	C7H14O2	130.099	HMDB00666	C17714	8094	chebiId:45571	Heptanoic acid	8094	sf	100	9.076	0	8	Heptanoic acid@13.86-sf	Heptanoic acid@13.89-sf	Heptanoic acid@13.82-sf	-	-	-	-	-	-	-	-	-
Hippuric acid@15.85-gc	Hippuric acid	FALSE	FALSE	15.846	1	Hippuric_acid	Unclassified	C9H9NO3	179.058	HMDB00714	C01586	464	chebiId:18089	Hippuric acid	464	gc	2310	4.016	9	9	-	-	-	-	-	-	-	-	-	Hippuric acid@15.85-gc	Hippuric acid@15.85-gc	Hippuric acid@15.85-gc
Histidine@16.89-gc	Histidine	FALSE	FALSE	16.889	1	Histidine	Amino acids	C6H9N3O2	155.069	HMDB00177	C00135	6274;773;3651426	-	Histidine	3651426	gc	324	2.832	9	9	-	-	-	-	-	-	-	-	-	Histidine@16.89-gc	Histidine@16.89-gc	Histidine@16.89-gc
Homoserine@10.36-gc	Homoserine	FALSE	FALSE	10.357	1	Homoserine	Amino acids	C4H9NO3	119.058	HMDB00719	C00263	12647;1502076;779;25245858;193314	chebiId:15699	Homoserine	193314	gc	17422	5.702	9	9	-	-	-	-	-	-	-	-	-	Homoserine@10.36-gc	Homoserine@10.35-gc	Homoserine@10.35-gc
Hyodeoxycholic acid@9.25-ba	Hyodeoxycholic acid	FALSE	FALSE	9.246	1	Hyodeoxycholic acid	Steroids	C24H40O4	392.293	HMDB00733	-	9963687;227033	-	Hyodeoxycholic acid	227033	ba	15	18.057	10	10	-	-	-	-	-	-	Hyodeoxycholic acid@9.22-ba	Hyodeoxycholic acid@9.25-ba	Hyodeoxycholic acid@9.26-ba	-	-	-
Hypotaurine@13.30-gc	Hypotaurine	FALSE	FALSE	13.298	1	Hypotaurine	Organic acids	C2H7NO2S	109.02	HMDB00965	C00519	107812;25244088	chebiId:16668	Hypotaurine	107812	gc	100	11.43	9	9	-	-	-	-	-	-	-	-	-	Hypotaurine@13.30-gc	Hypotaurine@13.30-gc	Hypotaurine@13.29-gc
Hypoxanthine@15.56-gc	Hypoxanthine	FALSE	FALSE	15.561	1	Hypoxanthine	Bases	C5H4N4O	136.039	HMDB00157	C00262	790	chebiId:17368	Hypoxanthine	790	gc	368	5.942	9	9	-	-	-	-	-	-	-	-	-	Hypoxanthine@15.57-gc	Hypoxanthine@15.56-gc	Hypoxanthine@15.56-gc
Indole-3-acrylic acid@9.70-pa	Indole-3-acrylic acid	FALSE	FALSE	9.695	1	Indole-3-acrylic_acid	Indoles	C11H9NO2	187.063	HMDB00734	-	15030923	-	Indole-3-acrylic acid	15030923	pa	10	39.51	8	8	-	-	-	Indole-3-acrylic acid@9.70-pa	Indole-3-acrylic acid@9.70-pa	Indole-3-acrylic acid@9.71-pa	-	-	-	-	-	-
Inosine@24.91-gc	Inosine	FALSE	FALSE	24.909	1	Inosine	Nucleosides	C10H12N4O5	268.081	HMDB00195	C00294	6021	chebiId:17596	Inosine	6021	gc	100	8.709	9	9	-	-	-	-	-	-	-	-	-	Inosine@24.92-gc	Inosine@24.91-gc	Inosine@24.90-gc
Inositol@19.66-gc	Inositol	FALSE	FALSE	19.656	1	Inositol	Unclassified	C6H12O6	180.063	HMDB06088;HMDB00211	C06153;C00137;C19891	892	chebiId:10642;chebiId:17268	Inositol	892	gc	5707	4.818	9	9	-	-	-	-	-	-	-	-	-	Inositol@19.67-gc	Inositol@19.66-gc	Inositol@19.65-gc
Isobutyric acid@4.83-sf	Isobutyric acid	FALSE	FALSE	4.834	1	Isobutyric_acid	Organic acids	C4H8O2	88.052	HMDB01873	C02632	6590	chebiId:16135	Isobutyric acid	6590	sf	227	4.908	0	8	Isobutyric acid@4.83-sf	Isobutyric acid@4.93-sf	Isobutyric acid@4.78-sf	-	-	-	-	-	-	-	-	-
Isocaproic acid@11.77-sf	Isocaproic acid	FALSE	FALSE	11.772	1	Isocaproic_acid	Fatty Acyls	C6H12O2	116.084	HMDB00689	-	12587	-	Isocaproic acid	12587	sf	100	8.443	0	8	Isocaproic acid@11.77-sf	Isocaproic acid@11.82-sf	Isocaproic acid@11.72-sf	-	-	-	-	-	-	-	-	-
Isoleucine@9.45-gc	Isoleucine	FALSE	FALSE	9.45	1	Isoleucine	Amino acids	C6H13NO2	131.095	HMDB00172	C00407	791;6306	chebiId:17191	Isoleucine	791	gc	12379	6.77	9	9	-	-	-	-	-	-	-	-	-	Isoleucine@9.46-gc	Isoleucine@9.45-gc	Isoleucine@9.44-gc
Isovaleric acid@9.00-sf	Isovaleric acid	FALSE	FALSE	9.003	1	Isovaleric_acid	Fatty Acyls	C5H10O2	102.068	HMDB00718	C08262	10430	chebiId:28484	Isovaleric acid	10430	sf	100	8.784	0	8	Isovaleric acid@9.00-sf	Isovaleric acid@9.08-sf	Isovaleric acid@8.92-sf	-	-	-	-	-	-	-	-	-
Ketoisocaproic acid@8.38-gc	Ketoisocaproic acid	FALSE	FALSE	8.378	1	Ketoisocaproic_acid	Organic acids	C6H10O3	130.063	HMDB00695	C00233	70	chebiId:48430	Ketoisocaproic acid	70	gc	100	5.197	9	9	-	-	-	-	-	-	-	-	-	Ketoisocaproic acid@8.38-gc	Ketoisocaproic acid@8.38-gc	Ketoisocaproic acid@8.37-gc
Ketoisovaleric acid@7.35-gc	Ketoisovaleric acid	FALSE	FALSE	7.349	1	Ketoisovaleric_acid	Organic acids	C5H8O3	116.047	HMDB00019	C00141	49	chebiId:11851;chebiId:16530	Ketoisovaleric acid	49	gc	109	4.494	9	9	-	-	-	-	-	-	-	-	-	Ketoisovaleric acid@7.35-gc	Ketoisovaleric acid@7.35-gc	Ketoisovaleric acid@7.34-gc
Kynurenine@21.18-gc	Kynurenine	FALSE	FALSE	21.18	1	Kynurenine	Unclassified	C10H12N2O3	208.085	HMDB00684	C00328	846;161166;25245862	chebiId:16946	Kynurenine	25245862	gc	100	5.876	9	9	-	-	-	-	-	-	-	-	-	Kynurenine@21.19-gc	Kynurenine@21.18-gc	Kynurenine@21.17-gc
Lactic acid@6.42-gc	Lactic acid	FALSE	FALSE	6.415	1	Lactic_acid	Organic acids	C3H6O3	90.032	HMDB01311;HMDB00190	C00256;C00186	61503;107689;19789253;612	chebiId:341;chebiId:42111;chebiId:422	Lactic acid	19789253	gc	415777	6.192	9	9	-	-	-	-	-	-	-	-	-	Lactic acid@6.42-gc	Lactic acid@6.42-gc	Lactic acid@6.40-gc
Lactose@27.27-gc	Lactose	FALSE	FALSE	27.269	1	Lactose	Carbohydrates	C12H22O11	342.116	HMDB00186	C00243	84571;440995	chebiId:17716	Lactose	440995	gc	224	35.226	9	9	-	-	-	-	-	-	-	-	-	Lactose@27.27-gc	Lactose@27.27-gc	Lactose@27.26-gc
Lauric acid@13.77-gc	Lauric acid	FALSE	FALSE	13.774	1	Lauric_acid	Fatty Acyls	C12H24O2	200.178	HMDB00638	C02679	3893	chebiId:30805	Lauric acid	3893	gc	162878	6.038	0	9	-	-	-	-	-	-	-	-	-	Lauric acid@13.78-gc	Lauric acid@13.77-gc	Lauric acid@13.77-gc
Leucine@9.16-gc	Leucine	FALSE	FALSE	9.158	1	Leucine	Amino acids	C6H13NO2	131.095	HMDB00687	C00123	6106;857;5255803	chebiId:15603	Leucine	5255803	gc	11052	5.061	9	9	-	-	-	-	-	-	-	-	-	Leucine@9.16-gc	Leucine@9.16-gc	Leucine@9.15-gc
Linoleic acid@21.25-gc	Linoleic acid	FALSE	FALSE	21.255	1	Linoleic_acid	Fatty Acyls	C18H32O2	280.24	HMDB00673	C01595	5280450;3931	chebiId:17351	Linoleic acid	3931	gc	83592	7.423	9	9	-	-	-	-	-	-	-	-	-	Linoleic acid@21.27-gc	Linoleic acid@21.25-gc	Linoleic acid@21.25-gc
Lysine@16.88-gc	Lysine	FALSE	FALSE	16.883	1	Lysine	Amino acids	C6H14N2O2	146.106	HMDB03405;HMDB00182	C00739;C00047	57449;5962;866;5248709	chebiId:16855;chebiId:18019	Lysine	5248709	gc	582	3.527	9	9	-	-	-	-	-	-	-	-	-	Lysine@16.89-gc	Lysine@16.88-gc	Lysine@16.88-gc
Malic acid@11.99-gc	Malic acid	FALSE	FALSE	11.991	1	Malic_acid	Organic acids	C4H6O5	134.022	HMDB00156;HMDB00744	C00149;C00711	525;20130941;222656	chebiId:30797;chebiId:6650	Malic acid	20130941	gc	312	5.596	9	9	-	-	-	-	-	-	-	-	-	Malic acid@12.00-gc	Malic acid@11.99-gc	Malic acid@11.99-gc
Maltose;Trehalose@27.59-gc	Maltose;Trehalose	FALSE	FALSE	27.589	1	Maltose__Trehalose	Carbohydrates	C12H22O11	342.116	HMDB00163;HMDB00975	C00208;C01083	439341;6255;439186;294;7427;1143	chebiId:17306;chebiId:16551	Maltose;Trehalose	294;1143	gc	206	11.445	9	9	-	-	-	-	-	-	-	-	-	Maltose;Trehalose@27.59-gc	Maltose;Trehalose@27.59-gc	Maltose;Trehalose@27.59-gc
Margaric acid@19.98-gc	Margaric acid	FALSE	FALSE	19.978	1	Margaric_acid	Fatty Acyls	C17H34O2	270.256	HMDB02259	-	10465	-	Margaric acid	10465	gc	16773	6.502	9	9	-	-	-	-	-	-	-	-	-	Margaric acid@19.99-gc	Margaric acid@19.97-gc	Margaric acid@19.97-gc
Methionine@12.33-gc	Methionine	FALSE	FALSE	12.327	1	Methionine	Amino acids	C5H11NO2S	149.051	HMDB00696	C00073	6137;876;5255805	chebiId:16643	Methionine	5255805	gc	1920	4.539	9	9	-	-	-	-	-	-	-	-	-	Methionine@12.33-gc	Methionine@12.33-gc	Methionine@12.32-gc
Methylmalonic acid@8.41-gc	Methylmalonic acid	FALSE	FALSE	8.409	1	Methylmalonic_acid	Organic acids	C4H6O4	118.027	HMDB00202	C02170	487	chebiId:30860	Methylmalonic acid	487	gc	354	9.347	9	9	-	-	-	-	-	-	-	-	-	Methylmalonic acid@8.41-gc	Methylmalonic acid@8.41-gc	Methylmalonic acid@8.40-gc
Methylsuccinic acid@9.81-gc	Methylsuccinic acid	FALSE	FALSE	9.809	1	Methylsuccinic_acid	Fatty Acyls	C5H8O4	132.042	HMDB01844	-	10349	-	Methylsuccinic acid	10349	gc	12170	9.288	0	9	-	-	-	-	-	-	-	-	-	Methylsuccinic acid@9.81-gc	Methylsuccinic acid@9.81-gc	Methylsuccinic acid@9.80-gc
Myristic acid@15.89-gc	Myristic acid	FALSE	FALSE	15.889	1	Myristic_acid	Fatty Acyls	C14H28O2	228.209	HMDB00806	C06424	11005	chebiId:28875;chebiId:30807	Myristic acid	11005	gc	801041	4.938	8	9	-	-	-	-	-	-	-	-	-	Myristic acid@15.90-gc	Myristic acid@15.89-gc	Myristic acid@15.89-gc
N-acetylaspartic acid@14.15-gc	N-acetylaspartic acid	FALSE	FALSE	14.149	1	N-acetylaspartic_acid	Amino acids	C6H9NO5	175.048	HMDB00812	C01042	65065;97508	chebiId:16953;chebiId:21547	N-acetylaspartic acid	97508	gc	100	11.899	9	9	-	-	-	-	-	-	-	-	-	N-acetylaspartic acid@14.15-gc	N-acetylaspartic acid@14.15-gc	N-acetylaspartic acid@14.14-gc
N-acetylputrescine@2.84-pa	N-acetylputrescine	FALSE	FALSE	2.836	1	N-acetylputrescine	Organic acids	C6H14N2O	130.111	HMDB02064	C02714	122356	chebiId:17768	N-acetylputrescine	122356	pa	10	27.571	7	8	-	-	-	N-acetylputrescine@2.85-pa	N-acetylputrescine@2.82-pa	N-acetylputrescine@2.84-pa	-	-	-	-	-	-
N-propylamine@5.85-gc	N-propylamine	FALSE	FALSE	5.849	1	N-propylamine	Unclassified	C3H9N	59.074	HMDB34006	-	7852	-	N-propylamine	7852	gc	9201	14.89	0	9	-	-	-	-	-	-	-	-	-	N-propylamine@5.85-gc	N-propylamine@5.84-gc	N-propylamine@5.84-gc
N1-acetylspermidine@5.38-pa	N1-acetylspermidine	FALSE	FALSE	5.382	1	N1-acetylspermidine	Amino acids	C9H21N3O	187.168	HMDB01276	C00612	496	chebiId:17927	N-acetylspermine	496	pa	10	21.152	8	8	-	-	-	N1-acetylspermidine@5.40-pa	N1-acetylspermidine@5.35-pa	N1-acetylspermidine@5.40-pa	-	-	-	-	-	-
N1-acetylspermine@6.70-pa	N1-acetylspermine	FALSE	FALSE	6.7	1	N-acetylspermine	Amino acids	C12H28N4O	244.226	HMDB01186	C02567	916	chebiId:17312	N-acetylspermine	916	pa	10	68.318	0	8	-	-	-	N1-acetylspermine@6.70-pa	N1-acetylspermine@6.67-pa	N1-acetylspermine@6.74-pa	-	-	-	-	-	-
N1,N12-diacetylspermine@5.76-pa	N1,N12-diacetylspermine	FALSE	FALSE	5.763	1	N1-N12-diacetylspermine	Amino acids	C14H30N4O2	286.237	HMDB02172;HMDB41876	C03413	132679;132680	chebiId:28101	N1,N12-diacetylspermine	132680	pa	10	74.62	0	8	-	-	-	N1,N12-diacetylspermine@5.76-pa	N1,N12-diacetylspermine@5.75-pa	N1,N12-diacetylspermine@5.76-pa	-	-	-	-	-	-
N1,N8-diacetylspermidine@4.37-pa	N1,N8-diacetylspermidine	FALSE	FALSE	4.373	1	N1-N8-diacetylspermidine	Amino acids	C11H23N3O2	229.179	HMDB41947	-	389613	-	N1,N8-diacetylspermidine	389613	pa	10	39.282	0	8	-	-	-	N1,N8-diacetylspermidine@4.37-pa	N1,N8-diacetylspermidine@4.36-pa	N1,N8-diacetylspermidine@4.39-pa	-	-	-	-	-	-
N8-acetylspermidine@5.52-pa	N8-acetylspermidine	FALSE	FALSE	5.52	1	N8-acetylspermidine	Amino acids	C9H21N3O	187.168	HMDB02189	C01029	123689	chebiId:27911	N-acetylspermidine	123689	pa	10	31.543	0	8	-	-	-	N8-acetylspermidine@5.53-pa	N8-acetylspermidine@5.51-pa	N8-acetylspermidine@5.55-pa	-	-	-	-	-	-
Niacinamide@11.75-gc	Niacinamide	FALSE	FALSE	11.75	1	Niacinamide	Unclassified	C6H6N2O	122.048	HMDB01406	C00153	936	chebiId:17154	Niacinamide	936	gc	1883	4.853	9	9	-	-	-	-	-	-	-	-	-	Niacinamide@11.76-gc	Niacinamide@11.75-gc	Niacinamide@11.75-gc
Nicotinic acid@9.38-gc	Nicotinic acid	FALSE	FALSE	9.376	1	Nicotinic_acid	Unclassified	C6H5NO2	123.032	HMDB01488	C00253	938;117629482	chebiId:15940	Nicotinic acid	117629482	gc	1746	24.328	7	9	-	-	-	-	-	-	-	-	-	Nicotinic acid@9.38-gc	Nicotinic acid@9.37-gc	Nicotinic acid@9.37-gc
Nonanoic acid@10.22-gc	Nonanoic acid	FALSE	FALSE	10.219	1	Nonanoic_acid	Fatty Acyls	C9H18O2	158.131	HMDB00847	C01601	8158	chebiId:29019	Nonanoic acid	8158	gc	357715	4.307	0	9	-	-	-	-	-	-	-	-	-	Nonanoic acid@10.22-gc	Nonanoic acid@10.22-gc	Nonanoic acid@10.21-gc
O-phosphoethanolamine@15.41-gc	O-phosphoethanolamine	FALSE	FALSE	15.414	1	O-phosphoethanolamine	Organic acids	C2H8NO4P	141.019	HMDB00224	C00346	1015;5232324	chebiId:17553	O-phosphoethanolamine	1015	gc	658	10.477	9	9	-	-	-	-	-	-	-	-	-	O-phosphoethanolamine@15.42-gc	O-phosphoethanolamine@15.41-gc	O-phosphoethanolamine@15.41-gc
Oleic acid;Elaidic acid@21.37-gc	Oleic acid;Elaidic acid	FALSE	FALSE	21.369	1	Oleic_acid__Elaidic_acid	Fatty Acyls	C18H34O2	282.256	HMDB00573;HMDB00207	C01712;C00712	637517;445639	chebiId:27997;chebiId:16196	Oleic acid;Elaidic acid	637517;445639	gc	14101	16.308	9	9	-	-	-	-	-	-	-	-	-	Oleic acid;Elaidic acid@21.38-gc	Oleic acid;Elaidic acid@21.37-gc	Oleic acid;Elaidic acid@21.36-gc
Omega-muricholic acid@5.83-ba	Omega-muricholic acid	FALSE	FALSE	5.826	1	Omega-muricholic acid	Steroids	C24H40O5	408.288	HMDB00364	C17727	5283851	chebiId:81299	omega-muricholic acid	5283851	ba	283	5.193	5	10	-	-	-	-	-	-	Omega-muricholic acid@5.78-ba	Omega-muricholic acid@5.83-ba	Omega-muricholic acid@5.86-ba	-	-	-
Ornithine@2.17-pa	Ornithine	FALSE	FALSE	2.174	1	Ornithine	Amino acids	C5H12N2O2	132.09	HMDB03374;HMDB00214	C00077;C00515	6262;389;71082	chebiId:15729;chebiId:16176	Ornithine	389	pa	10	3.125	8	8	-	-	-	Ornithine@2.17-pa	Ornithine@2.17-pa	Ornithine@2.17-pa	-	-	-	-	-	-
Oxaloacetic acid@14.27-sf	Oxaloacetic acid	FALSE	FALSE	14.27	1	Oxaloacetic_acid	Organic acids	C4H4O5	132.006	HMDB00223	C00036	970	chebiId:30744	Oxaloacetic acid	970	sf	100	19.118	0	8	Oxaloacetic acid@14.26-sf	Oxaloacetic acid@14.28-sf	Oxaloacetic acid@14.26-sf	-	-	-	-	-	-	-	-	-
Palmitic acid@18.32-gc	Palmitic acid	FALSE	FALSE	18.319	1	Palmitic_acid	Fatty Acyls	C16H32O2	256.24	HMDB00220	C00249	985	chebiId:15756	Palmitic acid	985	gc	3160163	5.439	0	9	-	-	-	-	-	-	-	-	-	Palmitic acid@18.33-gc	Palmitic acid@18.32-gc	Palmitic acid@18.31-gc
Palmitoleic acid@18.02-gc	Palmitoleic acid	FALSE	FALSE	18.017	1	Palmitoleic_acid	Fatty Acyls	C16H30O2	254.225	HMDB03229	C08362	445638;4668	chebiId:28716	Palmitoleic acid	445638	gc	3461	6.852	9	9	-	-	-	-	-	-	-	-	-	Palmitoleic acid@18.03-gc	Palmitoleic acid@18.02-gc	Palmitoleic acid@18.01-gc
Pantothenic acid@17.83-gc	Pantothenic acid	FALSE	FALSE	17.828	1	Pantothenic_acid	Amino acids	C9H17NO5	219.111	HMDB00210	C00864	6613;988	chebiId:29032;chebiId:46905;chebiId:7916	Pantothenic acid	988	gc	100	8.156	9	9	-	-	-	-	-	-	-	-	-	Pantothenic acid@17.84-gc	Pantothenic acid@17.83-gc	Pantothenic acid@17.82-gc
Phenylalanine@13.61-gc	Phenylalanine	FALSE	FALSE	13.612	1	Phenylalanine	Amino acids	C9H11NO2	165.079	HMDB00159	C00079	6140;994;57397115	chebiId:17295	Phenylalanine	57397115	gc	3383	4.754	9	9	-	-	-	-	-	-	-	-	-	Phenylalanine@13.62-gc	Phenylalanine@13.61-gc	Phenylalanine@13.61-gc
Phenylbutyric acid@12.46-gc	Phenylbutyric acid	FALSE	FALSE	12.457	1	Phenylbutyric_acid	Unclassified	C10H12O2	164.084	HMDB00329;HMDB01955;HMDB00543	-	4775	-	Phenylbutyric acid	4775	gc	1808	85.005	6	9	-	-	-	-	-	-	-	-	-	Phenylbutyric acid@12.46-gc	Phenylbutyric acid@12.46-gc	Phenylbutyric acid@12.45-gc
Phosphoenolpyruvic acid@13.36-gc	Phosphoenolpyruvic acid	FALSE	FALSE	13.359	1	Phosphoenolpyruvic_acid	Organic acids	C3H5O6P	167.982	HMDB00263	C00074	1005	chebiId:18021;chebiId:44897	Phosphoenolpyruvic acid	1005	gc	100	11.844	9	9	-	-	-	-	-	-	-	-	-	Phosphoenolpyruvic acid@13.36-gc	Phosphoenolpyruvic acid@13.36-gc	Phosphoenolpyruvic acid@13.35-gc
Phosphoric acid@9.26-gc	Phosphoric acid	FALSE	FALSE	9.256	1	Phosphoric_acid	Unclassified	H3O4P	97.977	HMDB01429;HMDB02142	C00009	1004	chebiId:18367;chebiId:26078	Phosphoric acid	1004	gc	54881	3.813	9	9	-	-	-	-	-	-	-	-	-	Phosphoric acid@9.26-gc	Phosphoric acid@9.25-gc	Phosphoric acid@9.25-gc
Proline@9.49-gc	Proline	FALSE	FALSE	9.487	1	Proline	Amino acids	C5H9NO2	115.063	HMDB03411;HMDB00162	C00763;C00148	8988;145742;25246272;614	chebiId:16313;chebiId:17203	Proline	25246272	gc	3183	10.294	9	9	-	-	-	-	-	-	-	-	-	Proline@9.49-gc	Proline@9.49-gc	Proline@9.48-gc
Propionic acid@2.84-sf	Propionic acid	FALSE	FALSE	2.843	1	Propionic_acid	Organic acids	C3H6O2	74.037	HMDB00237	C00163	1032	chebiId:30768	Propionic acid	1032	sf	428	4.442	0	8	Propionic acid@2.84-sf	Propionic acid@2.90-sf	Propionic acid@2.82-sf	-	-	-	-	-	-	-	-	-
Putrescine@4.68-pa	Putrescine	FALSE	FALSE	4.685	1	Putrescine	Unclassified	C4H12N2	88.1	HMDB01414	C00134	1045	chebiId:17148	Putrescine	1045	pa	10	21.139	8	8	-	-	-	Putrescine@4.67-pa	Putrescine@4.62-pa	Putrescine@4.78-pa	-	-	-	-	-	-
Pyruvic acid@14.00-sf	Pyruvic acid	FALSE	FALSE	13.998	1	Pyruvic_acid	Organic acids	C3H4O3	88.016	HMDB00243	C00022	1060	chebiId:32816	Pyruvic acid	1060	sf	1941	7.855	7	8	Pyruvic acid@14.00-sf	Pyruvic acid@14.03-sf	Pyruvic acid@13.97-sf	-	-	-	-	-	-	-	-	-
Raffinose@31.24-gc	Raffinose	FALSE	FALSE	31.241	1	Raffinose	Carbohydrates	C18H32O16	504.169	HMDB03213	C00492	10542;219993;439242	chebiId:16634	Raffinose	219993	gc	100	14.166	9	9	-	-	-	-	-	-	-	-	-	Raffinose@31.25-gc	Raffinose@31.24-gc	Raffinose@31.24-gc
Ribitol@14.88-gc	Ribitol	FALSE	FALSE	14.88	1	Ribitol	Carbohydrates	C5H12O5	152.068	HMDB00508	C00474	827	chebiId:15963	Ribitol	827	gc	259	7.753	9	9	-	-	-	-	-	-	-	-	-	Ribitol@14.89-gc	Ribitol@14.88-gc	Ribitol@14.88-gc
Ribose-5-phosphate@20.12-gc	Ribose-5-phosphate	FALSE	FALSE	20.12	1	Ribose-5-phosphate	Carbohydrates	C5H11O8P	230.019	HMDB01548	C00117	439167	chebiId:17797;chebiId:52742	Ribose-5-phosphate	439167	gc	100	7.741	9	9	-	-	-	-	-	-	-	-	-	Ribose-5-phosphate@20.13-gc	Ribose-5-phosphate@20.12-gc	Ribose-5-phosphate@20.11-gc
Ribose;Ribulose@14.36-gc	Ribose;Ribulose	FALSE	FALSE	14.356	1	Ribose__Ribulose	Carbohydrates	C5H10O5	150.053	HMDB00283;HMDB00621;HMDB03371	C00121;C00309;C00508	5779;993;79021;439204;439203	chebiId:47013;chebiId:17173;chebiId:16880	Ribose;Ribulose	993;79021	gc	100	6.681	9	9	-	-	-	-	-	-	-	-	-	Ribose;Ribulose@14.36-gc	Ribose;Ribulose@14.36-gc	Ribose;Ribulose@14.35-gc
Ribulose-5-phosphate@20.34-gc	Ribulose-5-phosphate	FALSE	FALSE	20.345	1	Ribulose-5-phosphate	Carbohydrates	C5H11O8P	230.019	HMDB00618	C00199;C01101	439184;439399	chebiId:17363;chebiId:17666	Ribulose-5-phosphate	439184	gc	100	8.199	9	9	-	-	-	-	-	-	-	-	-	Ribulose-5-phosphate@20.36-gc	Ribulose-5-phosphate@20.34-gc	Ribulose-5-phosphate@20.33-gc
S-adenosylmethionine@4.22-pa	S-adenosylmethionine	FALSE	FALSE	4.217	1	S-adenosylmethionine	Nucleosides	C15H22N6O5S	398.137	HMDB01185	C00019	34756;34755;5136	chebiId:15414;chebiId:67040	S-adenosylmethionine	5136	pa	10	13.547	5	8	-	-	-	S-adenosylmethionine@4.22-pa	S-adenosylmethionine@4.19-pa	S-adenosylmethionine@4.22-pa	-	-	-	-	-	-
Sarcosine@10.54-gc	Sarcosine	FALSE	FALSE	10.542	1	Sarcosine	Amino acids	C3H7NO2	89.048	HMDB00271	C00213	1088;7311726	chebiId:15611	Sarcosine	1088	gc	317	19.772	8	9	-	-	-	-	-	-	-	-	-	Sarcosine@10.54-gc	Sarcosine@10.54-gc	Sarcosine@10.54-gc
Sebacic acid@16.96-gc	Sebacic acid	FALSE	FALSE	16.963	1	Sebacic_acid	Fatty Acyls	C10H18O4	202.121	HMDB00792	C08277	5192	chebiId:41865	Sebacic acid	5192	gc	639	9.932	9	9	-	-	-	-	-	-	-	-	-	Sebacic acid@16.97-gc	Sebacic acid@16.96-gc	Sebacic acid@16.96-gc
Serine@10.35-gc	Serine	FALSE	FALSE	10.354	1	Serine	Amino acids	C3H7NO3	105.043	HMDB00187;HMDB03406	C00065;C00740	5951;617;6857552;71077	chebiId:17115	Serine	617	gc	3045	8.115	9	9	-	-	-	-	-	-	-	-	-	Serine@10.36-gc	Serine@10.35-gc	Serine@10.35-gc
Shikimic acid@15.24-gc	Shikimic acid	FALSE	FALSE	15.245	1	Shikimic_acid	Unclassified	C7H10O5	174.053	HMDB03070	C00493	8742;1094	chebiId:16119	Shikimic acid	1094	gc	100	7.234	9	9	-	-	-	-	-	-	-	-	-	Shikimic acid@15.26-gc	Shikimic acid@15.24-gc	Shikimic acid@15.24-gc
Spermidine@6.61-pa	Spermidine	FALSE	FALSE	6.611	1	Spermidine	Unclassified	C7H19N3	145.158	HMDB01257	C00315	1102	chebiId:16610	Spermidine	1102	pa	10	1.72	8	8	-	-	-	Spermidine@6.62-pa	Spermidine@6.58-pa	Spermidine@6.65-pa	-	-	-	-	-	-
Spermine@7.41-pa	Spermine	FALSE	FALSE	7.406	1	Spermine	Unclassified	C10H26N4	202.216	HMDB01256	C00750	1103	chebiId:15746	Spermine	1103	pa	10	11.424	8	8	-	-	-	Spermine@7.42-pa	Spermine@7.37-pa	Spermine@7.43-pa	-	-	-	-	-	-
Stearic acid@21.71-gc	Stearic acid	FALSE	FALSE	21.706	1	Stearic_acid	Fatty Acyls	C18H36O2	284.272	HMDB00827	C01530	5281	chebiId:25629;chebiId:28842	Stearic acid	5281	gc	240033	8.528	0	9	-	-	-	-	-	-	-	-	-	Stearic acid@21.72-gc	Stearic acid@21.71-gc	Stearic acid@21.70-gc
Succinic acid@9.66-gc	Succinic acid	FALSE	FALSE	9.66	1	Succinic_acid	Organic acids	C4H6O4	118.027	HMDB00254	C00042	1110;21952380	chebiId:15741	Succinic acid	1110	gc	13210	3.598	9	9	-	-	-	-	-	-	-	-	-	Succinic acid@9.66-gc	Succinic acid@9.66-gc	Succinic acid@9.65-gc
Sucrose@26.91-gc	Sucrose	FALSE	FALSE	26.909	1	Sucrose	Carbohydrates	C12H22O11	342.116	HMDB00258	C00089	5988;1115	chebiId:17992	Sucrose	1115	gc	2083	13.239	9	9	-	-	-	-	-	-	-	-	-	Sucrose@26.91-gc	Sucrose@26.91-gc	Sucrose@26.91-gc
Taurine@14.12-gc	Taurine	FALSE	FALSE	14.12	1	Taurine	Organic acids	C2H7NO3S	125.015	HMDB00251	C00245	1123;4068592	chebiId:15891	Taurine	1123	gc	100	6.318	9	9	-	-	-	-	-	-	-	-	-	Taurine@14.13-gc	Taurine@14.12-gc	Taurine@14.12-gc
Tauro-alpha-muricholic acid;Tauro-beta-muricholic acid;Tauro-omega-muricholic acid@2.29-ba	Tauro-alpha-muricholic acid;Tauro-beta-muricholic acid;Tauro-omega-muricholic acid	FALSE	FALSE	2.288	1	Tauromuricholic acid	Steroids	C26H45NO7S	515.292	HMDB00932	-	101657566;168408	chebiId:133057	TAURO Î±-MURICHOLIC ACID SODIUM SALT;Tauro-beta-muricholic acid	101657566;168408	ba	33	4.734	10	10	-	-	-	-	-	-	Tauro-alpha-muricholic acid;Tauro-beta-muricholic acid;Tauro-omega-muricholic acid@2.23-ba	Tauro-alpha-muricholic acid;Tauro-beta-muricholic acid;Tauro-omega-muricholic acid@2.30-ba	Tauro-alpha-muricholic acid;Tauro-beta-muricholic acid;Tauro-omega-muricholic acid@2.35-ba	-	-	-
Taurochenodeoxycholic acid@7.00-ba	Taurochenodeoxycholic acid	FALSE	FALSE	7.002	1	Taurochenodeoxycholic acid	Steroids	C26H45NO6S	499.297	HMDB00951	C05465	387316	chebiId:16525;chebiId:9407	Taurochenodeoxycholic acid	387316	ba	20	13.018	10	10	-	-	-	-	-	-	Taurochenodeoxycholic acid@6.83-ba	Taurochenodeoxycholic acid@7.00-ba	Taurochenodeoxycholic acid@7.10-ba	-	-	-
Taurocholic acid@4.48-ba	Taurocholic acid	FALSE	FALSE	4.476	1	Taurocholic acid	Steroids	C26H45NO7S	515.292	HMDB00036	C05122	440567;5247;46783527	chebiId:28865	Taurocholic acid	5247	ba	18	3.951	10	10	-	-	-	-	-	-	Taurocholic acid@4.40-ba	Taurocholic acid@4.48-ba	Taurocholic acid@4.53-ba	-	-	-
Taurodeoxycholic acid@8.10-ba	Taurodeoxycholic acid	FALSE	FALSE	8.096	1	Taurodeoxycholic acid	Steroids	C26H45NO6S	499.297	HMDB00896	C05463	2733768;440687;92042745	chebiId:36261;chebiId:9410	Taurodeoxycholic acid	2733768	ba	23	17.314	10	10	-	-	-	-	-	-	Taurodeoxycholic acid@7.89-ba	Taurodeoxycholic acid@8.12-ba	Taurodeoxycholic acid@8.23-ba	-	-	-
Taurohyodeoxycholic acid@4.17-ba	Taurohyodeoxycholic acid	FALSE	FALSE	4.167	1	Taurohyodeoxycholic acid	Steroids	C26H45NO6S	499.297	-	-	119046	-	Taurohyodeoxycholic acid	119046	ba	15	24.428	10	10	-	-	-	-	-	-	Taurohyodeoxycholic acid@4.09-ba	Taurohyodeoxycholic acid@4.17-ba	Taurohyodeoxycholic acid@4.23-ba	-	-	-
Tauroursodeoxycholic acid@3.99-ba	Tauroursodeoxycholic acid	FALSE	FALSE	3.993	1	Tauroursodeoxycholic acid	Steroids	C26H45NO6S	499.297	HMDB00874	-	12443252	-	Tauroursodeoxycholic acid	12443252	ba	14	13.084	10	10	-	-	-	-	-	-	Tauroursodeoxycholic acid@3.94-ba	Tauroursodeoxycholic acid@3.99-ba	Tauroursodeoxycholic acid@4.03-ba	-	-	-
Threonic acid@12.75-gc	Threonic acid	FALSE	FALSE	12.752	1	Threonic_acid	Carbohydrates	C4H8O5	136.037	HMDB00943	C01620	151152;439535;5460407	chebiId:15908;chebiId:49060	Threonic acid	439535	gc	100	5.598	9	9	-	-	-	-	-	-	-	-	-	Threonic acid@12.76-gc	Threonic acid@12.75-gc	Threonic acid@12.75-gc
Threonine@10.71-gc	Threonine	FALSE	FALSE	10.714	1	Threonine	Amino acids	C4H9NO3	119.058	HMDB00167	C00188	6288;205;15341575	chebiId:16857	Threonine	15341575	gc	24752	2.957	9	9	-	-	-	-	-	-	-	-	-	Threonine@10.72-gc	Threonine@10.71-gc	Threonine@10.71-gc
Thymine@10.86-gc	Thymine	FALSE	FALSE	10.861	1	Thymine	Bases	C5H6N2O2	126.043	HMDB00262	C00178	1135	chebiId:17821	Thymine	1135	gc	224	7.083	9	9	-	-	-	-	-	-	-	-	-	Thymine@10.87-gc	Thymine@10.86-gc	Thymine@10.86-gc
Tryptophan@21.60-gc	Tryptophan	FALSE	FALSE	21.604	1	Tryptophan	Indoles	C11H12N2O2	204.09	HMDB00929;HMDB30396	C00078;C00806	6305;1148;9060;4099458	chebiId:16828;chebiId:27897	Tryptophan	1148	gc	1406	5.435	9	9	-	-	-	-	-	-	-	-	-	Tryptophan@21.62-gc	Tryptophan@21.60-gc	Tryptophan@21.60-gc
Tyrosine@17.09-gc	Tyrosine	FALSE	FALSE	17.089	1	Tyrosine	Amino acids	C9H11NO3	181.074	HMDB00158	C00082	6057;1153;4300518	chebiId:17895	Tyrosine	1153	gc	989	4.684	9	9	-	-	-	-	-	-	-	-	-	Tyrosine@17.10-gc	Tyrosine@17.09-gc	Tyrosine@17.09-gc
Uracil@10.03-gc	Uracil	FALSE	FALSE	10.032	1	Uracil	Bases	C4H4N2O2	112.027	HMDB00300	C00106	1174	chebiId:17568	Uracil	1174	gc	2034	5.793	9	9	-	-	-	-	-	-	-	-	-	Uracil@10.03-gc	Uracil@10.03-gc	Uracil@10.03-gc
Urea@8.80-gc	Urea	FALSE	FALSE	8.805	1	Urea	Organic acids	CH4N2O	60.032	HMDB00294	C00086	1176	chebiId:16199	Urea	1176	gc	17381	4.453	9	9	-	-	-	-	-	-	-	-	-	Urea@8.81-gc	Urea@8.80-gc	Urea@8.79-gc
Uric acid@19.75-gc	Uric acid	FALSE	FALSE	19.754	1	Uric_acid	Bases	C5H4N4O3	168.028	HMDB00289	C00366	1175	chebiId:17775	Uric acid	1175	gc	100	9.265	9	9	-	-	-	-	-	-	-	-	-	Uric acid@19.76-gc	Uric acid@19.75-gc	Uric acid@19.75-gc
Ursodeoxycholic acid@8.85-ba	Ursodeoxycholic acid	FALSE	FALSE	8.851	1	Ursodeoxycholic acid	Steroids	C24H40O4	392.293	HMDB00946	C07880	31401	chebiId:9907	Ursodeoxycholic acid	31401	ba	16	20.023	10	10	-	-	-	-	-	-	Ursodeoxycholic acid@8.78-ba	Ursodeoxycholic acid@8.86-ba	Ursodeoxycholic acid@8.90-ba	-	-	-
Valeric acid@9.50-sf	Valeric acid	FALSE	FALSE	9.504	1	Valeric_acid	Fatty Acyls	C5H10O2	102.068	HMDB00892	C00803	7991	chebiId:17418	Valeric acid	7991	sf	100	7.241	0	8	Valeric acid@9.50-sf	Valeric acid@9.63-sf	Valeric acid@9.47-sf	-	-	-	-	-	-	-	-	-
Valine@8.41-gc	Valine	FALSE	FALSE	8.411	1	Valine	Amino acids	C5H11NO2	117.079	HMDB00883	C00183	6287;1182;5237032	chebiId:16414	Valine	1182	gc	20308	5.265	9	9	-	-	-	-	-	-	-	-	-	Valine@8.41-gc	Valine@8.41-gc	Valine@8.41-gc
Xanthine@18.24-gc	Xanthine	FALSE	FALSE	18.24	1	Xanthine	Bases	C5H4N4O2	152.033	HMDB00292	C00385	1188	chebiId:17712;chebiId:48517	Xanthine	1188	gc	100	6.996	9	9	-	-	-	-	-	-	-	-	-	Xanthine@18.25-gc	Xanthine@18.24-gc	Xanthine@18.23-gc
Xylitol@14.70-gc	Xylitol	FALSE	FALSE	14.698	1	Xylitol	Carbohydrates	C5H12O5	152.068	HMDB02917	C00379	6912	chebiId:17151	Xylitol	6912	gc	100	8.653	9	9	-	-	-	-	-	-	-	-	-	Xylitol@14.70-gc	Xylitol@14.70-gc	Xylitol@14.69-gc
Xylose@14.12-gc	Xylose	FALSE	FALSE	14.123	1	Xylose	Carbohydrates	C5H10O5	150.053	HMDB00098	C00181	135191;6027	chebiId:15936;chebiId:53455	Xylose	135191	gc	158	6.021	9	9	-	-	-	-	-	-	-	-	-	Xylose@14.13-gc	Xylose@14.12-gc	Xylose@14.12-gc

## Sheet: Area
Sid	12-dehydrocholic acid@5.34-ba	2-aminoadipic acid@15.25-gc	2-hydroxy-2-methylbutyric acid@3.43-sf	2-hydroxy-3-methylbutyric acid@4.53-sf	2-hydroxybutyric acid@2.47-sf	2-hydroxyglutaric acid@13.02-gc	2-oxoglutaric acid@13.03-gc	2-oxovaleric acid@14.60-sf	3-hydroxybutyric acid@1.66-sf	3-hydroxyisovaleric acid@7.83-gc	4-hydroxymandelic acid@15.24-gc	4-hydroxyproline@12.45-gc	5-aminovaleric acid@13.54-gc	5-oxoproline@12.36-gc	7,12-dihydroxy-3-oxocholanoic acid@6.49-ba	Acetic acid@1.78-sf	Adenine@16.20-gc	Alanine@6.92-gc	Allantoin@16.56-gc	Alpha-muricholic acid@5.94-ba	Alpha-tocopherol@29.53-gc	Anthranilic acid@13.44-gc	Arabinose@14.19-gc	Arabitol@14.83-gc	Arachidonic acid@23.77-gc	Asparagine@14.14-gc	Aspartic acid@12.38-gc	Behenic acid@26.42-gc	Benzoic acid@8.77-gc	Beta-alanine@11.17-gc	Beta-hydroxypyruvic acid@5.46-gc	Beta-muricholic acid@6.22-ba	Butanoic acid@5.21-sf	Cadaverine@4.64-pa	Capric acid@11.46-gc	Caproic acid@12.05-sf	Caprylic acid@8.96-gc	Chenodeoxycholic acid@10.31-ba	Cholesterol@29.53-gc	Cholic acid@9.11-ba	Citric acid;Isocitric acid@15.82-gc	Citrulline@15.79-gc	Creatine@12.81-gc	Cystine;Cysteine@23.03-gc	Cytosine@12.38-gc	Deoxycholic acid@10.53-ba	Dimethylglycine@5.46-gc	Erythritol@12.31-gc	Ferulic acid@19.23-gc
BlM-exp2-plasma_pre	NA	NA	91	21	89	NA	NA	10046	14	NA	NA	NA	NA	NA	NA	4209	NA	NA	NA	NA	NA	NA	NA	NA	NA	NA	NA	NA	NA	NA	NA	NA	1245	NA	NA	1618	NA	NA	NA	NA	NA	NA	NA	NA	NA	NA	NA	NA	NA
BlM_exp1-plasma_pre	16	12	NA	NA	NA	1206	64	NA	NA	3483	43	7480	553	119542	1100	NA	754	260120	28	135	13	413	77	7	1613	409	3445	1592	952359	4190	3690409	30	NA	1465	276076	NA	537008	1025	461	55	64347	95	454	140	674	447	6768947	183	8
BlM-exp2-plasma_post	NA	NA	7	1	14	NA	NA	2801	311	NA	NA	NA	NA	NA	NA	3568	NA	NA	NA	NA	NA	NA	NA	NA	NA	NA	NA	NA	NA	NA	NA	NA	736	NA	NA	1527	NA	NA	NA	NA	NA	NA	NA	NA	NA	NA	NA	NA	NA
BlM-exp1-plasma_pre	NA	NA	67	103	125	NA	NA	15777	280	NA	NA	NA	NA	NA	NA	4818	NA	NA	NA	NA	NA	NA	NA	NA	NA	NA	NA	NA	NA	NA	NA	NA	1273	NA	NA	1502	NA	NA	NA	NA	NA	NA	NA	NA	NA	NA	NA	NA	NA
BlM_exp3-plasma_pre	14	41	NA	NA	NA	2647	297	NA	NA	3276	36	1063	525	243236	48	NA	510	320769	13	64	9	131	204	26	1921	1972	7312	3327	1091893	1905	3662539	57	NA	2481	347740	NA	779886	256	2487	71	85080	2282	824	184	477	130	6986835	1266	40
BlM_exp1-plasma_post	20	65	NA	NA	NA	4426	697	NA	NA	4563	167	2372	551	75076	993	NA	769	564588	45	107	28	669	423	600	24684	1992	4213	1504	1191945	11555	5344513	83	NA	634	454879	NA	830025	159	1300	92	19539	1165	1201	1738	487	196	9940820	334	16
BlM_exp2-plasma_pre	16	70	NA	NA	NA	1854	32	NA	NA	4073	53	1323	1017	237085	26	NA	327	291494	32	74	6	289	453	79	1253	1210	3217	5650	2367337	8955	4337829	43	NA	922	448636	NA	754518	27	881	48	96863	490	822	201	599	124	7693803	877	33
BlM-exp1-plasma_post	NA	NA	9	4	21	NA	NA	4159	185	NA	NA	NA	NA	NA	NA	4739	NA	NA	NA	NA	NA	NA	NA	NA	NA	NA	NA	NA	NA	NA	NA	NA	1312	NA	NA	1399	NA	NA	NA	NA	NA	NA	NA	NA	NA	NA	NA	NA	NA
BlM-exp3-plasma_pre	NA	NA	173	216	212	NA	NA	13731	270	NA	NA	NA	NA	NA	NA	5063	NA	NA	NA	NA	NA	NA	NA	NA	NA	NA	NA	NA	NA	NA	NA	NA	1000	NA	NA	1675	NA	NA	NA	NA	NA	NA	NA	NA	NA	NA	NA	NA	NA
BlM_exp3-plasma_post	39	30	NA	NA	NA	5456	548	NA	NA	4712	49	2727	903	98033	10	NA	156	730232	29	73	7	152	291	120	18974	1778	7538	3588	1098140	2878	4298258	19	NA	2879	436328	NA	1003542	133	2548	74	14762	3879	725	986	191	237	8315143	1891	117
BlM_exp2-plasma_post	9	82	NA	NA	NA	718	484	NA	NA	6036	334	4972	2064	93428	6	NA	868	1795514	156	24	49	426	1216	853	27562	1559	4752	3190	2853194	15106	5966116	51	NA	825	568298	NA	1037936	27	2156	39	24237	2398	1390	1372	358	253	10622325	1392	50
BlM-exp3-plasma_post	NA	NA	9	7	61	NA	NA	4892	464	NA	NA	NA	NA	NA	NA	4088	NA	NA	NA	NA	NA	NA	NA	NA	NA	NA	NA	NA	NA	NA	NA	NA	802	NA	NA	1224	NA	NA	NA	NA	NA	NA	NA	NA	NA	NA	NA	NA	NA
QC-exp2-plasma_5a	NA	NA	544	7861	19518	NA	NA	23664	112894	NA	NA	NA	NA	NA	NA	10211	NA	NA	NA	NA	NA	NA	NA	NA	NA	NA	NA	NA	NA	NA	NA	NA	5611	NA	NA	2829	NA	NA	NA	NA	NA	NA	NA	NA	NA	NA	NA	NA	NA
QC_exp123-plasma_pre.baplasma1	662	NA	NA	NA	NA	NA	NA	NA	NA	NA	NA	NA	NA	NA	3497	NA	NA	NA	NA	2163	NA	NA	NA	NA	NA	NA	NA	NA	NA	NA	NA	43398	NA	NA	NA	NA	NA	3183	NA	17643	NA	NA	NA	NA	NA	10025	NA	NA	NA
QC-exp2-plasma_5b	NA	NA	494	8123	19878	NA	NA	13816	116362	NA	NA	NA	NA	NA	NA	10405	NA	NA	NA	NA	NA	NA	NA	NA	NA	NA	NA	NA	NA	NA	NA	NA	6327	NA	NA	2483	NA	NA	NA	NA	NA	NA	NA	NA	NA	NA	NA	NA	NA
QC_exp1-plasma_5b	872	30994	NA	NA	NA	457707	797936	NA	NA	9633	17273	2428171	81179	15076683	6866	NA	11893	109981381	265099	2525	2111	30178	150313	88374	1486949	245653	256600	4525	523649	306022	1070986	71302	NA	NA	459235	NA	870644	3887	1757145	22056	16565196	1313113	4241130	154419	12283	16404	1999334	143813	3854
QC-exp2-plasma_5c	NA	NA	472	7292	17456	NA	NA	14758	116086	NA	NA	NA	NA	NA	NA	10100	NA	NA	NA	NA	NA	NA	NA	NA	NA	NA	NA	NA	NA	NA	NA	NA	6008	NA	NA	2500	NA	NA	NA	NA	NA	NA	NA	NA	NA	NA	NA	NA	NA
QC_exp1-plasma_5c	1048	33669	NA	NA	NA	484903	833109	NA	NA	9701	16253	2591571	79017	15869638	6537	NA	11624	113707675	269157	2303	2109	31652	144402	112814	1503191	264000	273491	4786	558961	318725	1136435	73322	NA	NA	492189	NA	922375	3798	1870671	21969	17184779	1450197	4161246	166490	12426	15887	2086028	148360	3258
QC_exp1-plasma_5a	792	29273	NA	NA	NA	428475	724145	NA	NA	9103	16153	2158990	63987	14213594	7661	NA	10909	117957828	215963	2274	1794	27734	139127	73329	1372249	191096	224445	4669	491504	213918	956266	72431	NA	1286	422986	NA	811570	3819	1637498	22591	15624033	886183	4502997	130268	12054	16908	1797872	135566	4611
QC-exp2-plasma_5d	NA	NA	418	6963	16761	NA	NA	13332	115910	NA	NA	NA	NA	NA	NA	10217	NA	NA	NA	NA	NA	NA	NA	NA	NA	NA	NA	NA	NA	NA	NA	NA	5594	NA	NA	2636	NA	NA	NA	NA	NA	NA	NA	NA	NA	NA	NA	NA	NA
QC_exp3-plasma_5d	NA	NA	NA	NA	NA	NA	NA	NA	NA	NA	NA	NA	NA	NA	NA	NA	NA	NA	NA	NA	NA	NA	NA	NA	NA	NA	NA	NA	NA	NA	NA	NA	NA	1578	NA	NA	NA	NA	NA	NA	NA	NA	NA	NA	NA	NA	NA	NA	NA
QC_exp1-plasma_5d	861	33595	NA	NA	NA	510375	872003	NA	NA	11449	17672	2672075	93066	16613216	7264	NA	13934	118111530	268915	2839	1907	33628	153390	126851	1670869	269913	281758	5313	605306	338308	1189461	69331	NA	NA	519405	NA	973540	4014	1891199	20986	18025020	1552678	4102106	177197	13937	15762	2161647	158716	2986
QC-exp2-plasma_5e	NA	NA	482	7472	16463	NA	NA	12313	120215	NA	NA	NA	NA	NA	NA	10867	NA	NA	NA	NA	NA	NA	NA	NA	NA	NA	NA	NA	NA	NA	NA	NA	6055	NA	NA	2939	NA	NA	NA	NA	NA	NA	NA	NA	NA	NA	NA	NA	NA
QC_exp1-plasma_6a	NA	31685	NA	NA	NA	486813	827841	NA	NA	9824	15497	2574162	77048	16202752	NA	NA	8799	132193799	233101	NA	2335	31879	156364	121219	1732023	244342	255510	5124	569704	293977	1700765	NA	NA	NA	496262	NA	948362	NA	2032459	NA	17347856	1350723	4081545	173513	13574	NA	3172284	149735	2895
QC-exp2-plasma_5f	NA	NA	503	7532	17730	NA	NA	10808	118877	NA	NA	NA	NA	NA	NA	10681	NA	NA	NA	NA	NA	NA	NA	NA	NA	NA	NA	NA	NA	NA	NA	NA	5861	NA	NA	3347	NA	NA	NA	NA	NA	NA	NA	NA	NA	NA	NA	NA	NA
QC_exp3-plasma_5f	NA	NA	NA	NA	NA	NA	NA	NA	NA	NA	NA	NA	NA	NA	NA	NA	NA	NA	NA	NA	NA	NA	NA	NA	NA	NA	NA	NA	NA	NA	NA	NA	NA	1346	NA	NA	NA	NA	NA	NA	NA	NA	NA	NA	NA	NA	NA	NA	NA
QC_exp1-plasma_5f	819	NA	NA	NA	NA	NA	NA	NA	NA	NA	NA	NA	NA	NA	6715	NA	NA	NA	NA	2644	NA	NA	NA	NA	NA	NA	NA	NA	NA	NA	NA	67812	NA	NA	NA	NA	NA	3964	NA	20080	NA	NA	NA	NA	NA	15389	NA	NA	NA
QC_exp1-plasma_6b	NA	25990	NA	NA	NA	420199	727940	NA	NA	8883	14833	2223903	72474	14774840	NA	NA	6982	121680025	186942	NA	2267	27081	130623	123327	1420917	200291	223584	3753	576881	258708	1537684	NA	NA	NA	452595	NA	851000	NA	1864539	NA	15313626	1160721	3500348	155182	10761	NA	3035737	132574	2605
QC-exp2-plasma_4f	NA	NA	610	7081	17238	NA	NA	8414	122466	NA	NA	NA	NA	NA	NA	11065	NA	NA	NA	NA	NA	NA	NA	NA	NA	NA	NA	NA	NA	NA	NA	NA	6221	NA	NA	4688	NA	NA	NA	NA	NA	NA	NA	NA	NA	NA	NA	NA	NA
QC_exp1-plasma_5e	794	32929	NA	NA	NA	502764	871491	NA	NA	11664	17002	2692154	88734	17410581	6544	NA	11433	142912473	214457	2990	2915	33510	158744	150534	1821543	245713	292508	5211	712407	335294	1215544	69528	NA	NA	545872	NA	1015470	3628	2092057	20612	17978309	1582263	3383004	212044	15262	15191	2380553	154470	2766
QC-exp2-plasma_5g	NA	NA	615	7389	17332	NA	NA	9748	118355	NA	NA	NA	NA	NA	NA	10839	NA	NA	NA	NA	NA	NA	NA	NA	NA	NA	NA	NA	NA	NA	NA	NA	5959	NA	NA	3175	NA	NA	NA	NA	NA	NA	NA	NA	NA	NA	NA	NA	NA
QC_exp3-plasma_5g	NA	NA	NA	NA	NA	NA	NA	NA	NA	NA	NA	NA	NA	NA	NA	NA	NA	NA	NA	NA	NA	NA	NA	NA	NA	NA	NA	NA	NA	NA	NA	NA	NA	1081	NA	NA	NA	NA	NA	NA	NA	NA	NA	NA	NA	NA	NA	NA	NA
QC_exp1-plasma_5g	845	NA	NA	NA	NA	NA	NA	NA	NA	NA	NA	NA	NA	NA	6784	NA	NA	NA	NA	1855	NA	NA	NA	NA	NA	NA	NA	NA	NA	NA	NA	70725	NA	NA	NA	NA	NA	4249	NA	20165	NA	NA	NA	NA	NA	15915	NA	NA	NA
QC-exp1-plasma_7a	NA	NA	575	9823	20554	NA	NA	24517	92144	NA	NA	NA	NA	NA	NA	10709	NA	NA	NA	NA	NA	NA	NA	NA	NA	NA	NA	NA	NA	NA	NA	NA	6583	NA	NA	4554	NA	NA	NA	NA	NA	NA	NA	NA	NA	NA	NA	NA	NA
QC_exp1-plasma_6c	NA	28474	NA	NA	NA	430237	752526	NA	NA	9539	13075	2344348	67948	15360771	NA	NA	7717	124481825	186622	NA	2253	28529	140967	127129	1485788	208451	241656	4022	607614	262498	1584240	NA	NA	NA	478893	NA	894372	NA	1907851	NA	16073105	1218227	3495336	171622	13118	NA	3078756	141337	2871
QC_exp3-plasma_5a	NA	23449	NA	NA	NA	383866	748489	NA	NA	12055	23661	2071448	62017	10840573	NA	NA	8868	65952294	223804	NA	1943	20072	153534	80334	1518096	199142	164852	8104	736488	244772	2288164	NA	NA	2931	437994	NA	1014858	NA	1328890	NA	14477893	920775	2197186	150071	13968	NA	4328420	139319	7155
QC_exp1-plasma_5i	804	NA	NA	NA	NA	NA	NA	NA	NA	NA	NA	NA	NA	NA	6582	NA	NA	NA	NA	2308	NA	NA	NA	NA	NA	NA	NA	NA	NA	NA	NA	68203	NA	NA	NA	NA	NA	3508	NA	20117	NA	NA	NA	NA	NA	14983	NA	NA	NA
QC_exp123-plasma_post.baplasma1	567	NA	NA	NA	NA	NA	NA	NA	NA	NA	NA	NA	NA	NA	3687	NA	NA	NA	NA	2092	NA	NA	NA	NA	NA	NA	NA	NA	NA	NA	NA	41843	NA	NA	NA	NA	NA	2849	NA	15859	NA	NA	NA	NA	NA	10250	NA	NA	NA
QC-exp1-plasma_7b	NA	NA	611	10168	20873	NA	NA	22512	94407	NA	NA	NA	NA	NA	NA	11291	NA	NA	NA	NA	NA	NA	NA	NA	NA	NA	NA	NA	NA	NA	NA	NA	6959	NA	NA	4781	NA	NA	NA	NA	NA	NA	NA	NA	NA	NA	NA	NA	NA
QC_batch-exp1-plasma_PA_5b	NA	NA	NA	NA	NA	NA	NA	NA	NA	NA	NA	NA	NA	NA	NA	NA	NA	NA	NA	NA	NA	NA	NA	NA	NA	NA	NA	NA	NA	NA	NA	NA	NA	1292	NA	NA	NA	NA	NA	NA	NA	NA	NA	NA	NA	NA	NA	NA	NA
QC_exp1-plasma_6d	NA	32507	NA	NA	NA	479352	835594	NA	NA	10923	17142	2516806	75565	16933785	NA	NA	9454	134876927	196184	NA	2192	32039	155326	150578	1824704	228724	261648	5080	677098	298680	1784056	NA	NA	NA	527801	NA	995476	NA	2085748	NA	17470215	1377348	3504685	176622	13615	NA	3379898	149410	2559
QC_exp123-plasma_pre.baplasma2	668	NA	NA	NA	NA	NA	NA	NA	NA	NA	NA	NA	NA	NA	3306	NA	NA	NA	NA	2585	NA	NA	NA	NA	NA	NA	NA	NA	NA	NA	NA	39780	NA	NA	NA	NA	NA	2448	NA	14675	NA	NA	NA	NA	NA	8340	NA	NA	NA
QC_exp2-plasma_5a	275	28004	NA	NA	NA	460393	906494	NA	NA	11020	16501	2530601	83836	16235979	90	NA	9442	138874917	235668	1894	1960	19543	223538	102067	1930618	245195	245231	9139	815538	260577	2504899	23272	NA	NA	632494	NA	1084942	1530	1892025	11215	17915056	994668	4869285	142359	12705	10990	4595949	157929	2192
QC_exp3-plasma_5b	NA	22590	NA	NA	NA	412784	805945	NA	NA	13074	25764	2172671	63208	11384457	NA	NA	9672	69671356	220167	NA	1905	21266	162664	98034	1333765	214870	172659	6606	737172	254373	2429826	NA	NA	2543	456830	NA	1072142	NA	1398050	NA	15306954	866618	2099251	159355	14711	NA	4707408	142435	7972
QC-exp1-plasma_7c	NA	NA	614	10349	19718	NA	NA	22044	96125	NA	NA	NA	NA	NA	NA	10942	NA	NA	NA	NA	NA	NA	NA	NA	NA	NA	NA	NA	NA	NA	NA	NA	6868	NA	NA	5395	NA	NA	NA	NA	NA	NA	NA	NA	NA	NA	NA	NA	NA
QC_batch-exp1-plasma_PA_5c	NA	NA	NA	NA	NA	NA	NA	NA	NA	NA	NA	NA	NA	NA	NA	NA	NA	NA	NA	NA	NA	NA	NA	NA	NA	NA	NA	NA	NA	NA	NA	NA	NA	1399	NA	NA	NA	NA	NA	NA	NA	NA	NA	NA	NA	NA	NA	NA	NA
QC_exp2-plasma_5b	350	29421	NA	NA	NA	474309	949590	NA	NA	11142	17354	2758499	96995	16667745	1815	NA	11518	140330139	278431	2103	2577	20779	230377	113870	1596065	285846	267237	7177	834154	306905	2662779	22877	NA	NA	635732	NA	1103431	1490	1903449	11615	18278182	1258508	4861699	162753	16481	11262	4898530	158346	1824
QC_exp3-plasma_5c	NA	23636	NA	NA	NA	427398	844864	NA	NA	13880	24014	2292273	67039	11889829	NA	NA	9271	71027291	227234	NA	2263	22172	173537	110848	1346925	223811	182761	7248	780439	270042	2550058	NA	NA	2003	471127	NA	1135378	NA	1520536	NA	15904259	922200	2109630	171095	15379	NA	4924135	151232	8859
QC-exp1-plsma_7d	NA	NA	666	10392	20847	NA	NA	18362	97404	NA	NA	NA	NA	NA	NA	10988	NA	NA	NA	NA	NA	NA	NA	NA	NA	NA	NA	NA	NA	NA	NA	NA	7225	NA	NA	4991	NA	NA	NA	NA	NA	NA	NA	NA	NA	NA	NA	NA	NA
QC_batch-exp1-plasma_PA_5d	NA	NA	NA	NA	NA	NA	NA	NA	NA	NA	NA	NA	NA	NA	NA	NA	NA	NA	NA	NA	NA	NA	NA	NA	NA	NA	NA	NA	NA	NA	NA	NA	NA	1085	NA	NA	NA	NA	NA	NA	NA	NA	NA	NA	NA	NA	NA	NA	NA
QC_exp2-plasma_5c	278	29138	NA	NA	NA	488903	981968	NA	NA	11999	18598	2712916	100108	17175294	1604	NA	12184	144735694	263077	2371	2281	21990	234422	143833	1753314	271265	267482	5348	878643	307617	2746215	23795	NA	NA	656233	NA	1181343	1688	1969050	11803	19129795	1337814	4411429	173912	15349	11515	5057130	168550	1767
QC-exp1-plasma_7e	NA	NA	801	10326	22627	NA	NA	18511	98514	NA	NA	NA	NA	NA	NA	11091	NA	NA	NA	NA	NA	NA	NA	NA	NA	NA	NA	NA	NA	NA	NA	NA	7706	NA	NA	5185	NA	NA	NA	NA	NA	NA	NA	NA	NA	NA	NA	NA	NA
QC_batch-exp1-plasma_PA_5e	NA	NA	NA	NA	NA	NA	NA	NA	NA	NA	NA	NA	NA	NA	NA	NA	NA	NA	NA	NA	NA	NA	NA	NA	NA	NA	NA	NA	NA	NA	NA	NA	NA	957	NA	NA	NA	NA	NA	NA	NA	NA	NA	NA	NA	NA	NA	NA	NA
QC_exp2-plasma_6a	NA	29943	NA	NA	NA	472244	953214	NA	NA	10181	14899	2626935	84171	16356378	NA	NA	8643	138726762	234861	NA	2582	28002	221572	154930	1594317	259816	238605	5531	848816	296771	2514056	NA	NA	NA	593718	NA	1145716	NA	1984638	NA	18569331	1157345	3909203	171428	14937	NA	4606095	164633	1545
QC_exp2-plasma_5e	308	NA	NA	NA	NA	NA	NA	NA	NA	NA	NA	NA	NA	NA	2026	NA	NA	NA	NA	2496	NA	NA	NA	NA	NA	NA	NA	NA	NA	NA	NA	24531	NA	NA	NA	NA	NA	1445	NA	12248	NA	NA	NA	NA	NA	11185	NA	NA	NA
QC_exp2-plasma_6b	NA	28815	NA	NA	NA	489032	983086	NA	NA	11202	15985	2689737	91128	16883373	NA	NA	8842	143385973	234258	NA	2534	27490	228762	154841	1579067	271892	255004	5715	867482	294034	2603447	NA	NA	NA	629897	NA	1202791	NA	1992338	NA	19277886	1225021	3852109	186000	15050	NA	4721463	169060	1588
QC-exp1-plasma_7f	NA	NA	668	10513	20378	NA	NA	13238	96993	NA	NA	NA	NA	NA	NA	11464	NA	NA	NA	NA	NA	NA	NA	NA	NA	NA	NA	NA	NA	NA	NA	NA	6943	NA	NA	5506	NA	NA	NA	NA	NA	NA	NA	NA	NA	NA	NA	NA	NA
QC_batch-exp1-plasma_PA_5f	NA	NA	NA	NA	NA	NA	NA	NA	NA	NA	NA	NA	NA	NA	NA	NA	NA	NA	NA	NA	NA	NA	NA	NA	NA	NA	NA	NA	NA	NA	NA	NA	NA	943	NA	NA	NA	NA	NA	NA	NA	NA	NA	NA	NA	NA	NA	NA	NA
QC_exp3-plasma_5e	NA	26600	NA	NA	NA	460061	899151	NA	NA	14475	24185	2449074	69923	12817409	NA	NA	10269	72231859	187772	NA	2442	23301	182183	150910	1462267	210451	199325	8204	851035	278479	2856597	NA	NA	1761	512388	NA	1226070	NA	1646776	NA	17027537	959528	1789701	191461	16819	NA	5388294	161195	9796
QC_exp2-plasma_5d	307	31344	NA	NA	NA	533243	1068281	NA	NA	12839	18881	2936628	101893	18652165	2035	NA	11899	145933545	232766	2346	2383	24597	243883	203925	1860887	268614	294880	6780	985042	330359	2915457	23934	NA	NA	726923	NA	1310284	1599	2230512	11514	20923741	1492917	3700449	214393	17345	11118	5283223	181426	1535
QC-exp1-plasma_7g	NA	NA	709	10532	22385	NA	NA	10646	98210	NA	NA	NA	NA	NA	NA	11237	NA	NA	NA	NA	NA	NA	NA	NA	NA	NA	NA	NA	NA	NA	NA	NA	7224	NA	NA	5530	NA	NA	NA	NA	NA	NA	NA	NA	NA	NA	NA	NA	NA
QC_exp2-plasma_5f	220	NA	NA	NA	NA	NA	NA	NA	NA	NA	NA	NA	NA	NA	2156	NA	NA	NA	NA	2997	NA	NA	NA	NA	NA	NA	NA	NA	NA	NA	NA	24109	NA	NA	NA	NA	NA	1522	NA	12045	NA	NA	NA	NA	NA	11694	NA	NA	NA
QC_exp2-plasma_6c	NA	30658	NA	NA	NA	506101	1009757	NA	NA	12285	18953	2794812	97969	17608368	NA	NA	10369	145563981	227144	NA	2492	30737	238214	178690	1818819	263152	265223	5876	909739	311122	2640962	NA	NA	NA	657501	NA	1252470	NA	2048164	NA	20111917	1336128	3697608	187296	16104	NA	4864209	174289	1489
QC_batch-exp1-plasma_PA_5g	NA	NA	NA	NA	NA	NA	NA	NA	NA	NA	NA	NA	NA	NA	NA	NA	NA	NA	NA	NA	NA	NA	NA	NA	NA	NA	NA	NA	NA	NA	NA	NA	NA	839	NA	NA	NA	NA	NA	NA	NA	NA	NA	NA	NA	NA	NA	NA	NA
QC-exp1-plasma_7h	NA	NA	808	10630	22840	NA	NA	9329	96407	NA	NA	NA	NA	NA	NA	10911	NA	NA	NA	NA	NA	NA	NA	NA	NA	NA	NA	NA	NA	NA	NA	NA	7921	NA	NA	5505	NA	NA	NA	NA	NA	NA	NA	NA	NA	NA	NA	NA	NA
QC_exp1-plasma_5h	NA	NA	NA	NA	NA	NA	NA	NA	NA	NA	NA	NA	NA	NA	NA	NA	NA	NA	NA	NA	NA	NA	NA	NA	NA	NA	NA	NA	NA	NA	NA	NA	NA	749	NA	NA	NA	NA	NA	NA	NA	NA	NA	NA	NA	NA	NA	NA	NA
QC_exp2-plasma_5g	312	NA	NA	NA	NA	NA	NA	NA	NA	NA	NA	NA	NA	NA	2028	NA	NA	NA	NA	2319	NA	NA	NA	NA	NA	NA	NA	NA	NA	NA	NA	23519	NA	NA	NA	NA	NA	783	NA	11573	NA	NA	NA	NA	NA	11037	NA	NA	NA
QC_exp2-plasma_6d	NA	31230	NA	NA	NA	518713	1038698	NA	NA	11901	16841	2847731	95067	17885752	NA	NA	10898	145124141	222924	NA	2462	30372	249040	194443	1761053	263022	275109	6144	930818	316330	2741559	NA	NA	NA	671504	NA	1289122	NA	2230008	NA	20407682	1325118	3472418	188854	16813	NA	4918327	179502	1337
QC_exp123-plasma_post.baplasma2	468	NA	NA	NA	NA	NA	NA	NA	NA	NA	NA	NA	NA	NA	3695	NA	NA	NA	NA	2898	NA	NA	NA	NA	NA	NA	NA	NA	NA	NA	NA	41488	NA	NA	NA	NA	NA	2505	NA	15769	NA	NA	NA	NA	NA	8827	NA	NA	NA
QC-exp3-plasma_5a	NA	NA	920	18616	25801	NA	NA	31080	162868	NA	NA	NA	NA	NA	NA	15023	NA	NA	NA	NA	NA	NA	NA	NA	NA	NA	NA	NA	NA	NA	NA	NA	6878	NA	NA	3622	NA	NA	NA	NA	NA	NA	NA	NA	NA	NA	NA	NA	NA
QC_batch-exp2-plasma_5a	NA	NA	NA	NA	NA	NA	NA	NA	NA	NA	NA	NA	NA	NA	NA	NA	NA	NA	NA	NA	NA	NA	NA	NA	NA	NA	NA	NA	NA	NA	NA	NA	NA	828	NA	NA	NA	NA	NA	NA	NA	NA	NA	NA	NA	NA	NA	NA	NA
QC_batch-exp123-plasma_pre	546	NA	NA	NA	NA	NA	NA	NA	NA	NA	NA	NA	NA	NA	3525	NA	NA	NA	NA	3642	NA	NA	NA	NA	NA	NA	NA	NA	NA	NA	NA	39295	NA	NA	NA	NA	NA	1760	NA	14137	NA	NA	NA	NA	NA	6532	NA	NA	NA
QC_batch-exp3-plasma_5a	806	NA	NA	NA	NA	NA	NA	NA	NA	NA	NA	NA	NA	NA	2795	NA	NA	NA	NA	4045	NA	NA	NA	NA	NA	NA	NA	NA	NA	NA	NA	37416	NA	NA	NA	NA	NA	4719	NA	22527	NA	NA	NA	NA	NA	8839	NA	NA	NA
QC-exp3-plasma_5b	NA	NA	871	17474	24478	NA	NA	26581	156695	NA	NA	NA	NA	NA	NA	14660	NA	NA	NA	NA	NA	NA	NA	NA	NA	NA	NA	NA	NA	NA	NA	NA	6592	NA	NA	3522	NA	NA	NA	NA	NA	NA	NA	NA	NA	NA	NA	NA	NA
QC_batch-exp2-plasma_5b	NA	NA	NA	NA	NA	NA	NA	NA	NA	NA	NA	NA	NA	NA	NA	NA	NA	NA	NA	NA	NA	NA	NA	NA	NA	NA	NA	NA	NA	NA	NA	NA	NA	799	NA	NA	NA	NA	NA	NA	NA	NA	NA	NA	NA	NA	NA	NA	NA
QC_batch-exp3-plasma_5b	906	NA	NA	NA	NA	NA	NA	NA	NA	NA	NA	NA	NA	NA	3170	NA	NA	NA	NA	4154	NA	NA	NA	NA	NA	NA	NA	NA	NA	NA	NA	39017	NA	NA	NA	NA	NA	4839	NA	22747	NA	NA	NA	NA	NA	8491	NA	NA	NA
QC-exp3-plasma_5c	NA	NA	754	15640	21229	NA	NA	24283	155342	NA	NA	NA	NA	NA	NA	14665	NA	NA	NA	NA	NA	NA	NA	NA	NA	NA	NA	NA	NA	NA	NA	NA	5902	NA	NA	3717	NA	NA	NA	NA	NA	NA	NA	NA	NA	NA	NA	NA	NA
QC_batch-exp2-plasma_5c	NA	NA	NA	NA	NA	NA	NA	NA	NA	NA	NA	NA	NA	NA	NA	NA	NA	NA	NA	NA	NA	NA	NA	NA	NA	NA	NA	NA	NA	NA	NA	NA	NA	1383	NA	NA	NA	NA	NA	NA	NA	NA	NA	NA	NA	NA	NA	NA	NA
QC_batch-exp3-plasma_5c	717	NA	NA	NA	NA	NA	NA	NA	NA	NA	NA	NA	NA	NA	2805	NA	NA	NA	NA	3985	NA	NA	NA	NA	NA	NA	NA	NA	NA	NA	NA	38442	NA	NA	NA	NA	NA	4276	NA	22876	NA	NA	NA	NA	NA	8566	NA	NA	NA
QC_batch-exp2-plasma_5d	NA	NA	NA	NA	NA	NA	NA	NA	NA	NA	NA	NA	NA	NA	NA	NA	NA	NA	NA	NA	NA	NA	NA	NA	NA	NA	NA	NA	NA	NA	NA	NA	NA	1069	NA	NA	NA	NA	NA	NA	NA	NA	NA	NA	NA	NA	NA	NA	NA
QC-exp3-plasma_5d	NA	NA	734	15993	19932	NA	NA	21500	152509	NA	NA	NA	NA	NA	NA	14361	NA	NA	NA	NA	NA	NA	NA	NA	NA	NA	NA	NA	NA	NA	NA	NA	6209	NA	NA	4034	NA	NA	NA	NA	NA	NA	NA	NA	NA	NA	NA	NA	NA
QC_exp3-plasma_6a	NA	28273	NA	NA	NA	439328	868514	NA	NA	11093	25615	2612647	59741	11736203	NA	NA	8867	84094223	248982	NA	2207	26877	176886	120340	1367414	270284	208361	7292	762813	250167	702756	NA	NA	NA	440850	NA	1070924	NA	1523108	NA	16368600	1255109	2547186	197092	12114	NA	1330935	151968	8982
QC_batch-exp3-plasma_5d	817	NA	NA	NA	NA	NA	NA	NA	NA	NA	NA	NA	NA	NA	2753	NA	NA	NA	NA	3863	NA	NA	NA	NA	NA	NA	NA	NA	NA	NA	NA	39325	NA	NA	NA	NA	NA	4339	NA	23288	NA	NA	NA	NA	NA	9674	NA	NA	NA
QC_batch-exp2-plasma_5e	NA	NA	NA	NA	NA	NA	NA	NA	NA	NA	NA	NA	NA	NA	NA	NA	NA	NA	NA	NA	NA	NA	NA	NA	NA	NA	NA	NA	NA	NA	NA	NA	NA	984	NA	NA	NA	NA	NA	NA	NA	NA	NA	NA	NA	NA	NA	NA	NA
QC-exp3-plasma_5e	NA	NA	776	15507	20481	NA	NA	19280	155220	NA	NA	NA	NA	NA	NA	14210	NA	NA	NA	NA	NA	NA	NA	NA	NA	NA	NA	NA	NA	NA	NA	NA	6124	NA	NA	3462	NA	NA	NA	NA	NA	NA	NA	NA	NA	NA	NA	NA	NA
QC_exp3-plasma_6b	NA	27481	NA	NA	NA	437654	867903	NA	NA	12113	25100	2556843	59506	11817827	NA	NA	8660	88043545	210503	NA	2219	27290	174594	144045	1351985	251378	199831	7226	779652	238909	726903	NA	NA	NA	438867	NA	1091095	NA	1537068	NA	16107805	1161036	2360883	190724	13687	NA	1362988	151000	9009
QC_batch-exp3-plasma_5e	916	NA	NA	NA	NA	NA	NA	NA	NA	NA	NA	NA	NA	NA	2616	NA	NA	NA	NA	3841	NA	NA	NA	NA	NA	NA	NA	NA	NA	NA	NA	38797	NA	NA	NA	NA	NA	4605	NA	23192	NA	NA	NA	NA	NA	9186	NA	NA	NA
QC_batch-exp2-plasma_5f	NA	NA	NA	NA	NA	NA	NA	NA	NA	NA	NA	NA	NA	NA	NA	NA	NA	NA	NA	NA	NA	NA	NA	NA	NA	NA	NA	NA	NA	NA	NA	NA	NA	901	NA	NA	NA	NA	NA	NA	NA	NA	NA	NA	NA	NA	NA	NA	NA
QC-exp3-plasma_5f	NA	NA	734	15568	19437	NA	NA	15728	156161	NA	NA	NA	NA	NA	NA	13359	NA	NA	NA	NA	NA	NA	NA	NA	NA	NA	NA	NA	NA	NA	NA	NA	5860	NA	NA	4017	NA	NA	NA	NA	NA	NA	NA	NA	NA	NA	NA	NA	NA
QC_exp3-plasma_6c	NA	28134	NA	NA	NA	453789	899255	NA	NA	12187	24503	2645912	53150	12140368	NA	NA	8977	85256719	200015	NA	2385	28545	178668	139000	1300949	261627	208627	7273	794089	246717	740048	NA	NA	NA	454816	NA	1100980	NA	1555541	NA	16623856	1185614	2357051	184543	14129	NA	1410087	157504	9083
QC_batch-exp3-plasma_5f	827	NA	NA	NA	NA	NA	NA	NA	NA	NA	NA	NA	NA	NA	2822	NA	NA	NA	NA	4041	NA	NA	NA	NA	NA	NA	NA	NA	NA	NA	NA	38495	NA	NA	NA	NA	NA	3640	NA	23281	NA	NA	NA	NA	NA	9235	NA	NA	NA
QC-exp3-plasma_5g	NA	NA	788	15113	19797	NA	NA	12492	150608	NA	NA	NA	NA	NA	NA	13453	NA	NA	NA	NA	NA	NA	NA	NA	NA	NA	NA	NA	NA	NA	NA	NA	5824	NA	NA	3563	NA	NA	NA	NA	NA	NA	NA	NA	NA	NA	NA	NA	NA
QC_batch-exp2-plasma_5g	NA	NA	NA	NA	NA	NA	NA	NA	NA	NA	NA	NA	NA	NA	NA	NA	NA	NA	NA	NA	NA	NA	NA	NA	NA	NA	NA	NA	NA	NA	NA	NA	NA	1067	NA	NA	NA	NA	NA	NA	NA	NA	NA	NA	NA	NA	NA	NA	NA
QC_exp3-plasma_6d	NA	29203	NA	NA	NA	472703	937429	NA	NA	13649	27087	2835559	62598	12642565	NA	NA	9861	88275481	228724	NA	2539	30280	188894	135510	1499086	282090	223238	8223	825387	268395	778830	NA	NA	NA	469114	NA	1165630	NA	1639065	NA	17475379	1473760	2333085	202282	15098	NA	1476019	165785	10287
QC_batch-exp3-plasma_5g	788	NA	NA	NA	NA	NA	NA	NA	NA	NA	NA	NA	NA	NA	3074	NA	NA	NA	NA	3102	NA	NA	NA	NA	NA	NA	NA	NA	NA	NA	NA	37804	NA	NA	NA	NA	NA	4185	NA	21618	NA	NA	NA	NA	NA	8853	NA	NA	NA
QC_batch-exp123-plasma_post	688	NA	NA	NA	NA	NA	NA	NA	NA	NA	NA	NA	NA	NA	3825	NA	NA	NA	NA	3205	NA	NA	NA	NA	NA	NA	NA	NA	NA	NA	NA	41683	NA	NA	NA	NA	NA	1743	NA	13996	NA	NA	NA	NA	NA	7163	NA	NA	NA
HIRAE-j14-exp1-plasma_239	799	42379	498	5661	17496	826752	532023	19241	37787	13393	19616	3201806	142596	20177997	24219	6989	11014	131614918	500582	8978	1792	42357	129808	99652	1567903	408689	413866	5971	443236	810433	1847382	248427	2488	1354	365722	3632	791870	14616	1695478	45829	16081278	1710275	6648215	211700	10356	33214	3322245	131724	9174
BARNECIELA-j14-exp1-plasma_252	11958	39032	284	5865	28850	639158	1779173	16626	62126	10336	15539	2498400	98774	21629825	11595	11080	9960	137344549	301535	27008	1548	10509	97736	86475	1342255	695653	518037	6129	514025	567820	2269913	376138	18422	1310	397074	2682	803875	40879	1391056	495720	20505127	1262145	5650524	101715	16826	612	4039050	163692	4944
ATB-j7-exp1-plasma_207	5	20494	395	4957	15919	289657	827999	23709	122144	11085	13688	1992061	52159	9839682	626	7093	8106	89684077	131058	153	1900	676	141170	96343	2555800	195543	186833	4797	433182	140199	1202630	482	4469	666	386071	5263	782388	252	1707976	187	15950762	780964	2719361	94345	8597	254	2220232	105787	2340
HIRAE-j14-exp1-plasma_235	395	34656	525	5382	21535	354953	659006	24109	69127	12011	18256	2034193	89080	16884878	34855	7028	9759	102966205	241901	2317	1795	29503	217725	83962	2042419	171469	280537	5473	500311	300358	1708687	47947	4608	1145	362865	3692	758928	4791	1595716	14585	15220243	1007502	3922039	139111	11666	15268	3156889	107155	3625
BARNECIELA-j3-exp1-plasma_195	11	30944	338	5558	16430	531001	839165	16695	26556	8985	11457	3798809	67782	17007354	48	5732	7795	141017352	206550	119	2358	35361	121214	104446	917309	318850	252284	4981	652549	265660	1402135	1206	7658	1434	502882	5210	837760	343	2060850	659	12298960	1600169	4656791	126051	8614	205	2541020	169337	5303
ATB-j3-exp1-plasma_179	35	25466	374	5484	20664	437233	753599	19555	113990	7775	10531	2684518	46102	12285963	37	5082	8893	89002928	196866	1346	2117	636	133391	91037	1601357	220034	312335	4133	399184	247353	1022875	206	3085	1470	447650	3950	776717	65	1545127	110	17075805	1053270	3758370	128301	9786	79	1858899	101917	2448
BARNECIELA-j14-exp1-plasma_247	538	31268	327	4571	18671	376587	691479	18153	54257	11786	15468	2752322	62922	14867705	1738	7297	8628	87915934	193339	2405	1840	27197	253639	66918	1819895	177854	225562	5524	414789	277492	1631468	40281	4823	1074	400480	4708	773778	2538	1604453	11026	14036493	1072021	3304611	162839	15438	187	3032793	138209	4954
Nacl-j7-exp1-plasma_199	3668	33791	397	10807	20704	430177	757402	20383	99804	8842	19237	2085311	91913	17683384	3669	12415	11391	97394194	248430	9164	2455	110268	109360	85297	1505220	187452	288376	6701	576119	324524	1386368	81311	5641	1293	407975	4362	896215	4452	2021696	46742	17904268	815697	3397451	199370	22717	39122	2559080	148536	3676
HIRAE-j3-exp1-plasma_185	42	34693	469	6142	24705	670165	1579558	18948	98283	9911	18410	2576763	66166	18321177	39	9201	14725	120460000	161971	100	2731	2497	178704	140935	2229693	247277	311875	6527	577309	275345	1638640	734	9224	1590	694232	4808	1052633	172	2276357	593	25189873	1149770	3819175	100277	10148	69	3014318	202254	3648
ATB-j14-exp1-plasma_230	16	28278	450	5158	27465	241593	576471	16378	168961	10816	11852	2224734	75141	13698523	54	6246	8326	87440702	260135	28	2548	1147	182177	106961	2035495	250947	210980	4341	421998	204427	1509057	273	4985	1575	414580	4579	837911	180	1949625	261	14782773	1533843	3769734	147560	8001	159	2840380	113321	2950
FRAGILIS-j3-exp1-plasma_189	43	24640	418	9742	16137	653801	1032984	19116	54656	9275	14515	2807138	56595	11361935	148	7325	6924	97778064	186005	241	2298	1347	160366	88873	1267625	195893	191795	4967	544805	206201	1683833	8829	8661	891	599165	4589	1008431	285	1858664	458	17725585	935525	3765080	104312	12148	303	3140073	131493	3340
ATB-j14-exp1-plasma_232	20	24973	566	6941	41219	364805	1000536	21054	258238	12035	14739	2038616	67871	12917983	609	8561	8736	91931364	219964	24	2065	677	142026	94774	2294233	263139	197539	4873	412531	179815	1803939	708	7340	1415	429858	5571	795528	304	1725399	80	18957138	1214960	3460441	117722	9326	478	3333345	111008	3835
ATB-j3-exp1-plasma_175	20	24840	517	5654	23562	468073	741612	21742	121628	8915	14389	1945422	47066	11154876	52	6575	6439	92996779	167244	101	1950	516	141569	72774	1665860	213102	154154	5018	421824	196761	1141197	400	6391	1368	538608	5115	823003	90	1685241	39	13276946	1073416	3480738	119411	7601	181	2148195	93113	3128
HIRAE-j7-exp1-plasma_213	595	27389	535	9357	15381	498207	1055957	17252	94671	9602	12474	2247701	65238	13165458	2337	7855	9535	87883244	215387	1219	1939	12050	124345	80918	1238729	203556	237602	5065	425079	221210	1245490	48505	5566	1187	441154	3815	836696	2468	1891338	11835	19803523	972263	3752873	112823	11410	18008	2291460	121763	2342
Nacl-j7-exp1-plasma_203	148	30137	343	11653	12148	327975	581542	14368	58790	8767	19074	2064097	69375	19297599	1343	10380	10523	97466071	179914	1723	2306	47016	112847	98789	1329956	190205	316085	5864	641438	297625	2813742	9168	8285	1050	446998	4658	923804	1189	1965951	5575	13685366	936325	2518238	171744	14516	8581	5104444	155394	3687
Nacl-j3-exp1-plasma_169	5436	31673	517	9207	27126	573570	1000400	20658	130201	9516	17676	2156762	124835	15620256	43261	11023	10639	84153655	457180	13074	2246	99628	94857	95435	1570607	239637	324548	6329	507530	664048	1223021	179897	6377	1185	392173	5407	831745	8961	1858964	70851	20399489	1260255	4362975	302563	28738	70532	2283083	140162	2144
FRAGILIS-j7-exp1-plasma_221	24	32409	635	5595	17855	479427	984941	17176	148514	12380	11531	1370023	78038	15714849	502	7283	9677	82213839	267053	1500	1863	32813	144837	86456	1363428	186118	165031	4075	395182	188408	1910376	21718	4336	1129	408179	3760	769217	353	1599641	11793	20167138	720660	2702519	138072	9278	39982	3511162	119758	3233
ATB-j7-exp1-plasma_209	NA	27686	653	5614	9825	274104	787154	17839	71790	13132	10727	2593801	60708	14262514	NA	4912	6575	131600839	220289	NA	2055	333	141028	82486	1369797	408588	169288	3515	381646	198267	1161604	NA	2794	478	357902	3868	737798	NA	1712765	NA	13732453	1339813	5162340	200940	8085	NA	2210681	119804	5900
BARNECIELA-j3-exp1-plasma_193	19	25779	333	5827	16543	533439	651070	18345	26853	8653	14851	3210660	64829	15476533	602	6173	8693	119617966	201384	89	2301	38351	122127	89520	998096	255509	256109	4839	556541	266798	1353784	1345	4801	1285	496706	4611	897769	73	1898425	522	12720471	1401558	4230446	135253	8675	176	2535657	151759	4687
FRAGILIS-j7-exp1-plasma_217	413	23433	774	5440	16272	352810	618908	20167	171113	11391	10227	1236737	67105	13402526	1338	7000	7117	71497457	281960	2120	2150	20359	204993	69163	1337237	121182	136113	3835	398069	173921	1184957	48620	4880	1243	390063	3863	776015	386	1566278	15727	16017028	761300	2807456	147089	7588	19240	2278025	108256	1565
ATB-j3-exp1-plasma_177	49	26254	652	5442	22150	589247	1352220	16289	215031	10860	13219	2188796	58313	11537424	67	6487	7449	84455488	206087	44	2178	669	275329	130760	2004206	273269	134223	3981	443480	173488	943225	961	5164	1046	569975	5201	897855	121	1744851	857	21517104	1296566	3518282	152604	10140	282	1737390	120785	2956
FRAGILIS-j3-exp1-plasma_190	66	23450	605	18894	10428	557905	883747	15343	34761	9007	11266	3508235	63228	14132314	199	6611	7048	109611918	224081	1699	1510	5975	127976	121300	1178367	238377	196293	4166	582133	199658	1231581	65940	3917	1480	498416	3408	898009	1310	1616861	2492	16561209	1195418	3137569	141228	12002	4452	2293380	125916	4007
FRAGILIS-j14-exp1-plasma_241	1318	30913	569	7386	17682	409187	985886	15262	105353	11946	16490	1849933	89441	14972774	2903	6996	7754	70133317	266410	4012	2365	72589	112089	99061	1782365	228259	287363	5389	488781	294900	1903218	38201	7807	1052	441752	4282	875006	6029	2029750	27272	15783387	1116627	3602917	165872	16289	62927	3550569	149830	2499
Nacl-j3-exp1-plasma_171	52	26398	359	9324	16021	332025	588674	13130	48452	8618	19124	2246560	73020	15932888	1796	8916	9257	109150578	192804	1398	2415	55854	122434	115609	1593675	220159	230741	5379	524286	323148	1667077	13266	7538	1341	389349	4310	840549	1816	2003480	4931	13061969	1262485	2889506	170257	15494	11604	3105919	142381	4653
BARNECIELA-j7-exp1-plasma_225	108	36341	583	7004	8488	333123	345156	14960	26568	12875	13355	2880861	98465	18536666	757	5084	8970	128375286	366821	1201	2052	16499	240725	93823	1305167	375757	253484	4732	457919	309852	1815530	10842	3072	1344	372914	3430	789176	411	1970340	4267	15449949	1429688	6739575	225823	15216	313	3039460	157475	5826
HIRAE-j3-exp1-plasma_183	22	23746	673	6784	17882	444988	1085672	19118	69094	9664	12908	1784822	60104	13687887	606	7357	8370	104629871	168831	85	1946	725	123442	103502	1379659	172176	153388	3717	480764	183147	1819551	418	8357	966	549740	5783	879611	40	1763709	1110	18590976	779946	3575987	137400	9589	271	3376651	152181	2236
ATB-j14-exp1-plasma_233	33	37291	559	7986	15485	340598	855426	15892	50640	13307	12930	2950107	65665	16135127	817	4667	7104	123099255	221115	76	2083	769	152890	125061	1695228	338827	250405	5636	468975	253537	1925793	761	4193	1032	411715	4308	854478	94	1931343	176	14230129	1840818	4841005	184793	7679	204	3402280	121136	3981
HIRAE-j7-exp1-plasma_211	3159	36542	966	7845	26593	532941	962033	15752	383475	12336	9768	1919828	86513	17851256	1369	10154	7893	76765493	319836	1770	2110	9004	124747	91172	1377868	189140	191618	3466	450702	230917	1394364	85247	5227	1059	435132	4249	809351	2112	1585581	29209	21863612	948365	3412153	138871	13043	152	2611227	130208	1277
FRAGILIS-j14-exp1-plasma_246	460	34580	693	7933	22562	532432	1125634	14227	184862	12844	12458	1573718	79237	17954200	716	11548	8553	72593067	223025	5034	2253	71423	143386	113021	1582843	200810	252639	5854	485199	273332	1485374	24107	7161	1203	442948	4255	891105	3944	1807393	12238	18660505	1038803	3420545	126152	15611	45132	2754383	155829	3102
FRAGILIS-j14-exp1-plasma_243	113	34806	677	8889	24880	640777	1564424	16933	185779	14232	16842	1693325	86882	15983153	59	8856	8963	64578045	300351	5301	2265	83212	128044	88433	1909450	203584	218706	5285	417304	278311	1062584	26346	6556	1176	414648	3683	846835	3942	2001767	6289	22044239	972438	3706415	202169	21171	45216	1861787	157303	2205
ATB-j7-exp1-plasma_205	10	21645	394	4008	14701	248134	723674	12796	104370	10128	16036	1988975	62693	12160198	56	5406	8080	111428793	149633	220	2555	921	140888	125828	2816912	147122	234661	5657	551155	201684	2456983	238	3888	1314	491797	4694	920017	150	1857492	91	14928909	949460	2362295	101942	7079	268	4529035	104935	2002
Nacl-j7-exp1-plasma_201	1610	33388	592	11877	10874	456289	841242	14436	38984	9407	15239	2249628	77997	16668385	3640	6987	8273	86740553	242825	4436	2244	49542	117658	89123	1304823	186697	264215	4268	471035	275520	1412082	73996	4682	1262	402241	4871	873591	9846	1722895	24284	14803056	997846	3763714	214850	18326	21173	2662369	177740	2741
FRAGILIS-j3-exp1-plasma_191	22	31303	417	34676	13446	709401	946516	14323	30208	10706	13546	3851159	59836	14356484	584	4608	7234	141672813	152601	705	2338	2514	164159	110184	911836	206018	180688	4790	555127	221971	3060305	35771	7457	1316	561225	4699	1014151	471	2093435	886	17122364	1149320	3194130	112116	15639	1560	5555107	129231	3480
HIRAE-j7-exp1-plasma_215	2032	37530	741	7261	11307	508963	796461	13428	59579	14180	13895	2722300	109763	21531205	2244	6337	10120	115591273	364733	2963	2255	13903	138380	125806	1676035	361951	296053	5685	515697	431778	2625098	111295	3869	1091	464537	3538	933783	3154	1961761	59586	19006151	1418244	6040095	204079	14331	46315	4757384	283464	6402
BARNECIELA-j7-exp1-plasma_223	44	36206	642	7604	16488	446669	525118	10762	95569	12172	14332	2830157	96015	17433425	131	6578	6337	150658293	298158	330	2376	22547	200342	135939	2416271	321179	191181	5494	456768	278738	1303467	1804	4100	893	433673	4866	850101	149	2195160	396	14962029	1500918	4628115	217235	13006	82	2449590	194669	5022
Nacl-j7-exp1-plasma_202	1220	34193	588	8988	17321	340228	633319	16132	54716	7642	16830	2220935	97991	19063471	5067	7193	8337	130205881	276607	4916	2101	72537	109688	102178	1731999	209035	241173	6158	547769	311254	1374047	40533	5591	1761	419687	4972	904399	3196	1907476	20086	13424803	1198497	4323449	185596	15124	17974	2553765	128968	2504
FRAGILIS-j14-exp1-plasma_244	796	30750	519	9394	24197	640786	1509397	17477	127639	13254	15148	1712202	102368	16558188	988	10464	9428	73024083	342682	6214	2246	77859	165356	109075	1555432	194242	302971	4960	490379	342762	1854574	36072	7303	1158	431817	5011	892418	7997	1844415	15709	21723109	1009195	4308761	161340	22077	61641	3490803	162594	2525
Nacl-j3-exp1-plasma_172	842	41566	732	10615	22913	436888	740287	19929	90715	8407	21472	2156006	112369	24279424	9346	8382	12748	172101371	331273	6005	2281	61517	110045	130846	2245715	360683	331591	6326	651259	495197	1253317	62189	4999	1319	417341	3140	917122	3615	2039574	24372	18039681	1683726	6032395	386675	21676	25467	2341010	143026	3969
Nacl-j3-exp1-plasma_173	837	36481	730	9873	17009	393221	623043	18398	43782	8760	17073	2389300	106611	16959556	10062	7645	10321	120259848	384383	3420	2377	63717	110772	90824	1637470	341024	239589	5500	510951	462448	1430463	60293	5113	1389	406689	3737	867403	8948	2108125	24580	14134634	1424602	5648636	242913	17778	22027	2673787	120304	2907
HIRAE-j14-exp1-plasma_240	1066	34405	561	5035	14320	438514	637381	14691	56012	10985	12400	2636636	94945	16128705	12899	8499	8466	116752920	292780	11443	2361	96878	115103	116984	1410428	247418	313692	5929	559332	401763	2202262	150095	3789	1233	426509	3803	850222	7815	1935021	38210	16039097	1484076	3183354	169720	10167	53595	4027943	146559	4278
HIRAE-j3-exp1-plasma_184	14	28375	805	7026	16136	501590	959588	14194	207702	10443	15235	2680243	58034	16075687	656	7089	5951	116686966	138844	94	2107	1358	143348	119782	1930038	220511	181796	4475	513358	199491	1624600	236	6259	973	562320	5891	954866	100	1852397	381	17529253	988624	2857251	151231	8594	152	3024029	177864	1627
FRAGILIS-j7-exp1-plasma_222	450	31353	250	10065	11874	279575	315058	14184	41331	13168	13127	2679290	69070	16560385	1021	8448	9521	89761699	196562	7017	2453	17974	237749	97227	974490	195494	237291	4420	467067	326554	2252999	43073	14451	1012	439705	5173	835300	1690	2077189	54982	12110685	1008723	4064670	166471	18689	6113	4097224	140975	2749
Nacl-j3-exp1-plasma_170	291	29721	614	8576	21961	532479	1018671	18716	99987	9310	14373	2025733	116489	15448034	2574	7574	8652	106069019	387782	2449	2056	46968	125711	115897	1794178	191797	263304	5412	502959	393058	1544210	14015	4320	1170	416929	4881	880343	2356	1824932	5045	18231926	1173373	4446527	387744	19079	17065	2842916	163660	2554
BARNECIELA-j7-exp1-plasma_226	NA	34629	684	17166	19154	448879	676118	15422	52084	10146	16651	2591518	103093	17593893	NA	7240	9135	127953342	346443	NA	2174	18512	169996	96903	1635620	343197	282358	4839	458191	301016	1657851	NA	7266	1105	406719	4280	828178	NA	1798172	NA	15841975	1497140	5613295	137236	18378	NA	3059295	150303	3587
FRAGILIS-j3-exp1-plasma_187	52	35929	576	10287	17694	743339	820001	11944	29019	10994	17555	4545897	90225	17348593	274	3575	7764	163337652	252508	630	2496	6725	201869	127453	1216197	289860	199921	5093	523909	312623	1575370	27033	4019	993	596137	3932	1009860	298	2148791	773	14175860	1623982	4817558	105868	12016	1591	2741408	175001	6011
BARNECIELA-j14-exp1-plasma_248	145	27216	318	3830	14855	349317	579398	8900	187636	13297	12280	1693099	70180	13243794	1355	7973	6281	71009525	163198	568	2416	16480	132354	121350	2027293	137598	157416	4425	458189	215832	1802812	7176	4779	682	398970	4399	788844	764	1900003	5049	18105242	750612	2369678	188669	13052	212	3623772	127213	2281
BARNECIELA-j3-exp1-plasma_196	4	27288	413	8106	17873	554569	911736	14328	26702	8811	14806	3100221	52283	14868799	38	6087	7988	142953202	129320	100	2722	30252	121842	93849	1142959	180932	223797	5058	504848	217159	1322997	3785	13216	886	548174	6850	930719	182	2266210	517	15503554	1197117	3127168	145321	7493	177	2470889	158555	2415
ATB-j7-exp1-plasma_206	12	31384	380	4488	14615	325560	887474	11872	85853	13350	15699	2432838	60400	13559623	690	5860	8170	115306606	193076	107	2363	646	164113	137312	2216952	232547	218518	4949	475041	214192	3656044	419	3795	1344	442707	4335	890634	78	2060872	91	16722374	1150465	3572608	154435	8182	139	6631986	129110	2618
BARNECIELA-j3-exp1-plasma_197	12	28641	383	6280	12385	488809	871074	10396	38037	12209	15056	3050038	62486	15379194	49	6842	7233	128074105	149515	101	2517	31417	104537	104833	1130637	206312	230994	3335	538190	256513	1357796	711	11769	754	562536	7657	952423	55	2051967	472	15509204	1142909	3501171	142836	9247	235	2493544	173560	3396
ATB-j14-exp1-plasma_231	9	28290	376	3625	16768	335833	855017	12021	146096	13467	13750	2226370	60255	14716111	751	6371	6319	119276617	187461	43	2414	1202	142041	103563	1806618	322403	237659	4429	462224	206273	2170171	560	3669	942	442458	4244	850827	26	1942812	124	15676816	1699448	3660992	190638	7718	179	4050898	97737	2872
HIRAE-j3-exp1-plasma_182	17	29649	281	4650	11577	376595	495608	10395	17456	8255	10455	3321052	62562	15086566	768	4011	7960	160956896	147869	118	2245	627	97560	107668	1063947	263335	262843	3699	478464	254100	1539442	169	3306	912	503252	4290	824135	243	1801432	309	11151033	1198465	4856552	74574	8198	305	3082380	137247	2871
BARNECIELA-j7-exp1-plasma_227	12	35333	305	3253	6891	679267	737732	10213	30150	12482	20143	4071393	97340	17293308	621	4941	12709	209801352	239366	84	2474	21484	144477	153647	2084014	362017	397979	6863	542220	401525	1802834	1439	2614	997	425268	2752	858033	236	2087089	614	16612516	1618277	5893116	187921	12809	416	3345955	166011	7932
Nacl-j3-exp2-plasma_134	193	26814	418	10688	8766	356514	621920	17349	34160	8842	18037	2993764	78966	13716920	2308	6124	8942	146320508	270762	4263	2190	64189	147140	101859	1308400	293268	236366	8522	611306	332474	1707456	17172	4309	1056	492607	1151	926853	1265	1913321	7284	12918480	1076785	5280592	169218	18172	14385	3107775	175033	2096
ATB-j3-exp2-plasma_142	21	25372	189	5231	9867	316435	686839	16039	21449	10198	15818	3026216	62589	17865565	8	5519	9801	152022611	153875	146	2026	1048	152901	107699	1729874	259747	251701	7819	811734	275453	4276582	643	2623	747	545880	1373	1048553	80	1732016	236	13625302	1168532	3908651	139766	9200	146	7733696	117601	2302
MITSUAKI-j3-exp2-plasma_154	42	27126	580	5098	16088	404603	1380578	16394	210611	12162	18351	2118220	51788	13994961	40	8734	7084	103112758	157925	800	1584	1024	161592	106468	2282514	178311	165719	6492	694946	151935	2894690	22636	4267	680	615627	1505	1108966	588	1570501	5145	20546793	898787	2665474	98537	7770	166	5289525	186426	1084
ATB-j3-exp1-plasma_178	11	24850	391	6240	17264	449346	963887	9818	77364	8110	11838	2562440	55246	12358552	33	5608	7793	123213480	143912	73	2116	840	133411	145302	1225168	201740	226592	3998	623790	231285	1650203	427	4302	722	548255	4546	829480	120	1918121	228	15249476	1150457	2739476	118957	8642	143	3254943	126775	2868
ATB-j7-exp2-plasma_166	16	26681	347	5300	16218	355629	870857	19760	150109	9451	20868	2192013	55230	13626004	25	7610	9990	129633037	129005	62	2282	420	229507	137592	2674256	183212	259838	7255	870005	199604	2482648	419	6124	1115	614649	2592	1082257	141	1989371	181	17032769	1012114	4464168	87097	8232	31	4526078	121343	1357
BARNECIELA-j14-exp1-plasma_251	95	31194	534	8286	13206	393320	525144	13721	44198	11538	13528	2082063	68856	15129007	1578	9128	7544	106084201	168026	530	2067	19344	101340	105512	1526391	179636	292858	4857	529665	250922	837713	13560	7540	795	353454	3407	700144	1271	1777874	3060	13827984	929103	4220189	124193	13894	234	1700099	136406	1814
HIRAE-j14-exp1-plasma_236	10062	25924	574	5527	27661	539031	686306	9321	145944	10615	13587	2441829	80188	17876040	299509	12806	8837	113063687	175986	11979	2639	33908	132545	153648	1737497	174859	323543	4877	573121	347059	1353628	2255642	4908	837	415558	5010	771610	45836	2013227	192482	17785851	1089693	3149711	179576	13130	1338	2673790	146741	2131
ATB-j7-exp1-plasma_208	23	24486	955	7984	16638	320246	881948	13551	248556	11084	12521	1719480	57635	12150952	39	6778	7658	95626031	132155	193	2266	554	130359	106155	2402534	170559	191943	3344	454718	174579	1304277	296	3301	1047	439214	4647	794398	51	1768230	292	17975617	852300	3110706	131547	8855	250	2606182	106738	1012
MITSUAKI-j7-exp2-plasma_178	3214	41725	517	4494	15278	465592	775994	15570	168523	13102	14297	2361928	86973	19546882	173	8684	8774	102019023	274236	5564	2050	2591	104155	87573	1532534	204476	298015	5817	682104	265079	1826360	79895	3931	918	562436	1913	1052406	1560	1668799	63288	17420312	1202322	4165413	127307	11547	13230	3403782	173623	863
BURKO-j3-exp2-plasma_148	91	26445	545	7173	20341	671685	1679229	19574	116973	10065	15592	2077566	69985	13170305	11	8948	9508	108272280	167461	435	2308	7923	119166	116620	1564088	129568	193652	5644	668262	187547	1796299	18754	4465	626	587489	1681	1000071	323	1800448	7015	24982529	921168	4370282	132577	14536	317	3288017	222238	1797
FRAGILIS-j14-exp1-plasma_245	600	28254	514	8623	30126	346818	622022	13071	148765	13832	14877	1887206	95614	13371623	1546	9771	5806	87741909	254608	9219	2081	52405	92537	105701	2127646	213344	228693	4371	521573	446527	1238306	63433	5273	913	392921	4334	789868	9816	1806903	18892	12135998	1139094	3413805	174006	17293	48560	2523352	121434	2138
ATB-j14-exp1-plasma_229	15	20117	374	3784	12793	224249	396686	10698	44034	9518	12369	1900981	62887	13412736	631	7813	7119	109324131	120617	167	2668	885	115319	117659	2132522	145569	314624	4723	519762	207740	1617353	255	7635	798	461615	5586	830844	174	1927388	120	10289150	1234999	2321913	77438	8548	289	3234358	92075	1605
ATB-j14-exp1-plasma_234	47	29775	390	5009	17489	336852	873199	6920	61452	10657	12232	2646402	73562	17522494	35	5590	9541	137976333	179521	83	2335	362	145679	160957	1614598	302255	335614	4283	512650	262817	1878831	537	3152	814	421154	3883	859471	127	1764306	518	17879405	1462723	2980584	132811	10741	121	3675598	122961	2432
ATB-j14-exp2-plasma_185	11	28849	461	5058	14546	300100	804675	12835	173952	14927	12058	2498911	63587	14385724	20	6379	7830	127504071	210885	96	2158	838	187234	160422	1604756	319514	213839	5520	680261	199501	1105815	523	2814	469	532809	1910	1034915	22	1933430	168	16741508	1280155	3709775	216010	8350	125	2140001	125040	1616
HIRAE-j7-exp1-plasma_214	6576	35652	662	7796	28346	639207	941124	13004	235198	13439	19365	2404316	105637	19220861	8982	7972	9635	101664304	258112	5511	2394	34837	140036	120808	3451585	207761	302481	7370	962149	510244	1797201	262274	4227	888	553836	4240	1005089	10771	2134633	59974	26256589	1290942	3668398	272539	17920	33669	3345774	149925	1905
Nacl-j7-exp2-plasma_161	217	30745	315	8373	21297	531029	921975	17019	52022	10959	15211	4165694	103556	15864813	2341	10185	10670	191089313	365691	3611	2357	77369	128807	146117	1110293	338271	226286	6352	705314	382855	1791983	24310	6217	563	499287	1245	982440	1257	1967284	7874	17980569	1257910	7384102	281006	19809	17178	3317715	201763	2989
FRAGILIS-j7-exp1-plasma_219	954	37250	1043	7827	22285	950306	1367046	19036	307817	25767	22152	2530449	329369	43743556	7142	8811	14990	56980593	413411	6079	3374	92277	152476	255880	3799068	304341	303855	12077	889077	599634	5840464	103573	3673	1044	872355	3876	1711905	3346	3130340	30056	38214681	1885363	3420792	1571793	19658	85978	10824950	268954	4666
HIRAE-j14-exp1-plasma_237	404	29465	838	6731	15844	385547	910945	10351	81186	11627	13258	1469658	106506	15656174	13131	9353	8645	95746966	310473	2111	2640	33514	143809	120745	1336439	205855	257209	4557	676303	377385	1162575	91936	6031	868	408020	4899	775055	7379	2114060	37058	18173238	1194863	2812234	167471	10396	39383	2143933	113613	1696
MITSUAKI-j14-exp2-plasma_197	46	36500	749	7294	30667	457509	713099	6924	139736	14569	14459	1993289	133068	19792288	51	6872	8373	129508946	421581	3951	1936	17248	196318	129747	1555112	396358	249029	6246	763144	498671	1719553	9629	3892	383	555748	1855	1213217	2105	1639530	4776	17416246	1306974	5190163	271004	14061	12615	3177892	117747	1234
BURKO-j7-exp2-plasma_172	38	28992	271	7446	11235	361525	510663	8209	40090	13216	12205	2962236	91930	14506561	50	6458	7897	127344917	301471	627	2394	15649	123020	106395	1261773	254825	233158	4615	713685	356897	2129918	2629	3069	620	455400	1282	970613	434	1717330	1762	11952569	1175500	5096160	124881	16117	4296	3970900	166644	2187
FRAGILIS-j7-exp1-plasma_218	85	23784	589	7349	17849	417519	844655	9741	136524	12736	12897	1711309	48742	13203656	1229	10585	7001	95045498	135870	522	2301	1022	279558	123859	1876254	153288	155674	5645	558943	160140	1502140	23866	5876	503	439533	5375	820501	418	1959353	3663	15311698	984046	2139686	121229	10773	227	3077122	220631	1988
ATB-j3-exp1-plasma_176	12	25911	412	6034	22398	550009	919793	10618	58137	8686	13188	2246114	66053	13044781	883	7224	8728	112807897	164405	135	2867	523	151120	148640	1701662	183168	225343	5261	616924	244067	1458538	341	7900	932	646529	6292	923900	174	2178214	68	16685347	1122142	4147391	97694	10315	181	2860225	124886	2867
BARNECIELA-j7-exp1-plasma_228	438	24995	863	6990	22623	504232	1173502	8668	117293	15018	11787	1371757	99525	16940582	2396	7795	8833	93940864	233466	1529	2421	35938	218137	146638	1407208	147089	182378	4224	542429	266918	4263527	61016	7077	764	485397	4637	882250	1168	1897579	30651	20405356	690771	2925138	117410	12207	77454	8134447	160730	1310
BURKO-j3-exp2-plasma_147	120	28251	392	9361	23861	607316	1572466	11911	220433	9778	13662	2505974	68930	13846799	23	12611	6554	110768194	187320	1314	2338	8425	107957	116095	1694093	185093	160685	5575	644687	161881	1181521	34629	4789	680	588170	2187	1004802	406	1805907	9145	23055883	907838	3733751	111694	15934	203	2227997	257640	1309
Nacl-j3-exp2-plasma_137	1136	25514	374	7226	14447	470120	666148	11338	41003	9316	19210	2881465	109503	15172998	4746	7758	10672	144038933	318216	4449	2088	77546	180052	136640	1226402	249071	312983	5565	642475	485625	2517996	18599	4280	1062	474424	1679	969550	4411	1925435	15198	17024631	1221558	4226949	216098	28098	20345	4531871	163194	1683
ATB-j3-exp2-plasma_141	6	30487	467	5893	22049	391036	997990	14730	212841	9725	15424	2602039	88093	15476423	50	7640	10074	132784101	261370	57	2287	1129	196222	160774	1880824	316585	262308	5264	599922	232854	2730367	96	4495	819	551249	1711	1034900	73	1790692	104	18439654	1378645	5125723	224451	11358	136	5016674	141241	1612
HIRAE-j7-exp1-plasma_212	823	29664	819	8697	24633	433179	867918	10550	178725	10975	11331	1563617	76868	14117534	2349	9156	7166	83764186	226878	2323	2592	6291	111404	122511	1584495	133187	179331	3800	463217	222899	1776166	62569	5467	556	457462	4733	819486	3039	1871589	14874	21738149	782937	3128910	143163	10791	26130	3329858	117115	879
BARNECIELA-j7-exp1-plasma_224	173	24128	827	5765	22856	385197	632823	9358	196170	10434	10208	1550697	90653	13781459	572	9683	8125	82458675	276027	2709	2352	30650	130640	110704	1636050	125983	229775	3899	486147	276672	1449167	22988	10186	797	475614	6711	842259	1386	1940719	7398	15547052	719975	3645438	138139	10012	9633	2862347	127529	1209
Nacl-j7-exp1-plasma_200	771	27660	394	14285	13413	454254	743182	9603	33348	8170	12538	2741125	84715	14486387	1149	4952	7029	126257999	245154	3672	2284	42928	121995	120965	881381	217530	224732	4098	571958	339997	1879732	20987	7483	978	422488	5460	893343	2772	1926506	9054	12976982	1061663	4433450	177327	16696	14875	3663095	162619	5003
MITSUAKI-j3-exp2-plasma_153	466	35254	485	6975	25513	677234	1528551	16060	105605	10969	20417	2561285	81985	17874778	71	10317	9002	139285109	182153	6881	2434	1102	228442	154821	2107147	215006	242420	6346	751486	250195	2522298	119307	7250	843	641956	3166	1075443	3500	1786688	74520	25475010	1169204	5090818	105291	11635	255	4593389	195123	904
FRAGILIS-j3-exp1-plasma_188	18	29921	338	9302	21250	1138932	1018896	9119	22801	9591	12298	5060125	84989	15752448	460	4992	7656	161880823	256319	966	2743	10060	182179	143605	971979	270919	330075	4111	614491	320529	1485412	52886	2873	1093	562960	5563	901887	571	1959697	1115	14464470	1762578	4433217	110713	11023	478	2831900	164925	6565
HIRAE-j3-exp1-plasma_181	NA	33435	476	6403	16666	479868	829909	10482	30349	8365	9077	3870213	81704	16998437	NA	5004	7926	177163412	233290	NA	2438	776	117783	116577	1117514	407639	213800	3682	558616	352484	2228479	NA	6413	902	555822	6822	883662	NA	1802746	NA	15820110	1446623	4942333	73876	9902	NA	4465973	174687	4362
BURKO-j7-exp2-plasma_171	25	21853	484	7123	15267	433588	798363	16104	41500	11357	14596	2003852	85533	12085048	8	6944	7447	128430780	222635	990	2075	13375	190947	115414	1158000	173884	210956	5542	778934	293007	2237210	4289	5449	922	509553	2595	1027972	79	1772481	1575	13332270	777432	4014542	74816	13766	852	4083742	138436	1299
ATB-j7-exp2-plasma_165	32	26236	381	5499	10851	308047	846302	10452	39695	11340	23429	2496993	55321	15496932	7	5740	7814	143763328	116464	70	2061	851	289016	121325	2252893	238586	280746	6190	790517	219543	2401042	127	2137	993	516812	1456	1003856	224	1777018	183	14544039	1379870	3712528	162216	9305	281	4395203	99198	1610
BARNECIELA-j3-exp1-plasma_194	44	24708	356	5799	11492	467428	846027	7385	19360	10751	12483	3484261	52785	14395435	47	4172	7033	141471116	133811	68	2709	23299	106840	118802	1031112	247003	156427	3913	534100	186737	1480073	897	3644	742	534843	4525	908838	178	2093815	927	10842825	1336222	3000898	199059	8595	198	2880384	129395	2813
MITSUAKI-j14-exp2-plasma_196	89	34090	922	7883	16974	422026	920564	12831	239492	13070	19314	1519343	91949	16055407	6749	8970	8637	107237189	261436	2166	2030	21432	177137	163523	2228093	265934	235312	6413	800355	298448	1837863	16903	5113	750	600921	2592	1121298	4234	1774176	14514	19147455	1078821	3571572	170127	12650	35892	3264995	113653	808
BURKO-j14-exp2-plasma_190	188	24965	843	13694	19103	383730	908084	14079	194899	12218	12614	1548974	65392	11290081	694	13018	7368	86708898	218823	543	1926	4212	159473	106133	1543755	194899	135129	4647	606869	146110	1538607	17527	5785	978	564070	2849	981525	795	1749809	9066	17941130	827170	3497437	131280	12429	154	2894021	150210	1020
FRAGILIS-j14-exp1-plasma_242	514	29676	621	7767	17685	548126	982268	7458	57639	12191	14838	1817364	117721	16477491	621	5954	9704	106690430	329244	3806	2456	41225	109154	120170	1430655	162682	291154	4755	577027	486560	2440620	38601	7247	841	435866	4134	850200	1997	2006141	8338	17466969	1036325	3754991	139827	18661	16699	4793955	172103	2596
Nacl-j7-exp1-plasma_204	740	30441	680	9902	12459	350173	824952	8251	67616	8485	15867	1472293	70044	16188169	2132	11219	7853	113576089	175322	4418	2543	61904	85828	111781	1231361	193970	180316	4760	574790	209256	1184043	35894	6672	960	443088	6006	868967	5359	2145015	15110	15793952	930972	2873895	157128	15620	30000	2332892	142431	2649
ATB-j14-exp2-plasma_184	4	27402	512	6531	23686	327090	877207	12704	139615	17003	12503	2262480	75638	15242669	5	7821	7086	96178567	167498	137	2533	1131	165996	161531	2245957	241561	181546	5546	660784	195921	3857906	565	5992	383	555899	3037	1105683	17	1961731	114	17242269	1172814	2904923	154886	10199	134	7116384	130566	1926
BARNECIELA-j14-exp1-plasma_249	281	21346	766	8003	35340	442245	911975	9586	268619	12387	12741	1180739	77001	11056864	3141	14062	6188	71861587	227922	1498	2153	16908	95898	120249	1934195	148214	157090	4514	581515	219252	969173	15416	7224	733	443809	3504	802191	2561	1732000	8606	19375140	781540	2969672	126102	12673	519	1914087	127555	2022
Nacl-j7-exp2-plasma_159	733	32291	340	7851	19657	526293	960349	9088	76273	12134	18091	2632697	123444	18629087	9766	9771	9662	134039716	403667	7624	2167	89262	114502	148385	1339023	293992	323301	5563	1013827	479031	1865468	47692	6297	1083	559204	1843	1087298	5237	2013387	21111	17236028	1366451	4266057	276172	26378	23577	3476795	161333	2317
FRAGILIS-j3-exp1-plasma_192	98	26052	581	11235	19775	717214	1281258	8228	36046	9859	16004	2494553	61316	16118507	124	6319	12379	133693795	129045	408	2513	7998	163028	134127	1126045	155787	306642	4051	695030	275621	1443713	26469	6244	709	541274	4902	892261	179	1888362	1077	22892231	1029653	2540515	124438	11382	160	2803341	128515	1567
ATB-j3-exp2-plasma_140	47	30388	449	4339	20289	439944	1027364	13831	198070	9390	20030	2376518	88122	16632849	22	6912	10306	140517487	228470	145	2342	1260	480571	183442	2889613	232438	304914	6980	765966	260779	2787062	2618	4787	912	557756	1763	1082018	127	1971907	1376	17023784	1371186	4909668	207696	9472	135	5027693	154825	2145
BURKO-j14-exp2-plasma_191	422	26481	88	530	2212	348273	567784	4748	9858	13623	14828	2353019	82033	14915504	7152	3496	6311	84708169	232697	1301	2126	10147	135997	99919	1916272	169845	222094	5909	602095	303150	2204858	36320	108203	703	513528	725	1002224	2032	1736940	11947	14339125	978981	3571301	129836	16745	165	4058486	148378	1578
BURKO-j14-exp2-plasma_189	194	33688	461	7439	16210	319556	419045	11872	312153	14086	14913	2479001	75004	15549920	1725	9172	8588	102018254	205443	625	2609	3383	107474	121715	2229057	251963	228648	5189	1258802	247731	2561172	20735	3291	863	629280	2074	1150498	1049	2100530	10302	16388073	1062093	4220240	354661	14096	293	4705946	125487	793
HIRAE-j3-exp1-plasma_186	35	29032	587	7191	25792	556016	990050	9881	172798	9652	11086	2804385	66756	19885230	801	7664	9599	160293938	161524	1390	2595	763	150302	141949	1803247	247349	303392	4165	732855	256016	2549750	135	6455	635	627805	6156	1019807	181	1934767	303	21079307	1211526	3374644	146283	9741	392	4688143	178173	1801
Nacl-j3-exp2-plasma_135	79	28930	239	10540	12289	311610	318964	10483	39261	11579	14889	3225966	115074	15445014	2426	8372	6423	152414888	351697	2988	2344	49870	202738	122145	941073	337898	161154	4728	720010	469052	2269486	15403	3777	996	485745	1117	1007208	3308	2087109	4153	11124686	1554140	4384583	237346	18885	11137	4221582	154687	2757
HIRAE-j7-exp1-plasma_216	1578	45334	830	8122	9421	630321	838668	7771	36338	14310	17076	3416000	109703	24014680	1943	5236	9831	163446534	268912	1956	2788	20988	129292	166903	2039739	364846	320027	6092	604870	413824	1454783	118115	2930	1055	502363	4727	996558	2165	2426997	31798	19425962	1724676	5523953	322857	18446	36350	2923049	290614	5166
MITSUAKI-j3-exp2-plasma_156	59	28680	393	5036	15338	691896	1420604	9880	131205	11161	12911	2256743	61853	15749285	34	12542	6936	115403841	173368	1026	1995	263	172994	125076	1441789	163021	170572	4803	675670	177203	2516977	37039	4696	944	592744	1875	1111223	569	1803450	10347	23019864	947099	3678184	120297	8497	398	4588181	165447	869
Nacl-j3-exp1-plasma_174	NA	33275	533	11575	19955	456549	661255	16548	49793	8199	12514	2723717	99031	15961847	NA	6851	8989	143899008	275023	NA	2159	63283	95087	110930	1196156	270602	268262	5339	635378	435276	1586366	NA	4083	1025	370399	3867	805826	NA	1916344	NA	15281313	1177984	5818074	244508	17703	NA	3107885	168528	3886
ATB-j3-exp2-plasma_144	8	25636	662	5527	9826	414432	966568	11448	99246	10147	14569	2695130	67348	12623556	8	7093	8841	141530585	191109	26	2746	524	178600	111883	2452272	236964	173609	5646	795870	181722	2564187	208	4776	997	659447	2013	1108686	43	1886844	105	17456687	964350	5035643	143271	8931	337	4603592	129056	1035
BURKO-j3-exp2-plasma_150	118	45656	394	6635	12947	760099	1833971	10659	71003	12471	13426	3697847	104772	23637006	52	11021	10795	195074273	284005	1239	2390	8353	154206	138762	1516711	346665	259235	9484	932443	274280	2206125	29517	4712	1019	724512	1499	1150827	237	2024656	7719	25537562	1485614	5243255	208211	13298	7720	4121152	220248	3240
BARNECIELA-j14-exp1-plasma_250	1169	27278	407	6561	19257	360300	730254	7990	92583	11746	12308	2006774	84552	13967038	7573	11994	5362	80849619	279936	4272	1833	26757	80747	104290	1488387	161607	183872	4345	578706	360847	1814246	29516	6833	888	400976	3499	825492	5501	1811840	12216	13548922	1051304	4020994	139816	18304	416	3539385	156330	2808
MITSUAKI-j7-exp2-plasma_177	787	31161	478	4149	14007	795604	1643675	9545	136588	14124	19897	2132111	115412	16750626	4528	11330	9071	123982552	314630	8197	2408	3646	152195	156030	1655680	207334	272496	7136	891394	326936	2175151	52550	4869	1180	661632	2404	1213400	2270	1922902	17449	26152882	1157327	4003207	124184	12425	30458	4021173	176899	1546
ATB-j3-exp1-plasma_180	34	33464	520	6045	19164	461457	1122346	10089	42104	9586	12149	2385447	67218	16247484	119	5129	8693	134947236	152418	126	2275	554	645395	195991	1376290	251203	252246	4050	627527	245751	2222641	3644	4427	667	569210	6120	945124	190	1921058	2076	17377480	1182978	3702135	128833	13908	81	4226004	128897	3222
HIRAE-j14-exp1-plasma_238	1332	32515	692	7210	21504	411032	700760	7469	135351	12976	13047	1675295	89612	16175612	8942	9241	8155	98373689	266956	8686	2307	34247	118356	146064	1394314	205796	214072	4889	485300	312925	1379424	136932	3883	925	434789	5148	857326	10744	2092081	38521	16574769	1163863	2802897	177361	11785	1370	2730889	113402	4719
Nacl-j7-exp2-plasma_160	804	23756	345	10371	21382	457636	973966	8257	138590	13353	21750	2231639	142000	14272039	12366	11032	8641	109798428	288214	7688	2326	64911	123681	116783	2769803	196671	210124	7667	859422	336594	2274008	42977	6284	1039	585673	2127	1123436	5260	2049474	21526	17379393	1498143	3530889	167704	28443	29745	4195886	154531	939
FRAGILIS-j7-exp1-plasma_220	254	29032	835	7459	25809	721199	1231385	9414	177793	13461	10163	1663069	94149	15719406	2720	7411	10011	106579100	265141	1477	2147	39724	225951	132634	1404598	157911	227522	3904	630014	298220	3047312	34620	6726	766	493169	4803	902408	804	1926737	8035	26059552	1019442	3316905	128421	12253	56435	5740770	143073	1285
MITSUAKI-j7-exp2-plasma_179	1317	23061	706	5088	17636	722378	1318054	10216	249959	17357	13110	1561865	126632	21194886	2859	13204	8490	50783607	194970	3640	2304	30813	151831	157728	1665780	143382	205312	6062	597512	299351	5750447	56335	6097	1392	617348	2263	1143947	1447	1844555	42905	26198932	567445	1622107	75482	14201	33241	10146239	212549	771
MITSUAKI-j14-exp2-plasma_195	260	26512	791	5542	10982	529295	1090613	9070	94078	12028	14062	1500654	114885	15322632	4077	7681	11452	112253156	327565	4037	2444	46478	219515	193619	1641119	222899	275595	6374	1063403	299007	2997106	18808	5505	1180	642867	2643	1229059	2872	2166497	21111	20871866	899517	3996384	140738	14106	35595	5431876	147650	1009
ATB-j7-exp2-plasma_164	32	31960	369	6422	12021	305780	925381	9184	88791	14271	19521	2886918	70496	16781382	11	6468	7260	137975852	156466	110	2749	702	367233	173780	2403904	298487	220030	6825	814260	219979	2489383	320	2450	716	596977	2434	1131358	64	2343405	146	16319242	1480983	4043915	224733	8978	149	4530164	120954	1157
BURKO-j7-exp2-plasma_170	34	27172	313	9449	11888	392667	625296	9974	40452	13352	13358	3068218	98330	16230089	8	7057	8584	152464763	253854	999	2255	8944	446424	157792	1232855	260190	288022	6279	882981	333741	2052279	3256	3440	789	533302	1930	1086237	217	1978585	1267	13903785	1133912	4198881	107198	16027	3766	3808833	155165	2456
Nacl-j7-exp2-plasma_158	117	22457	219	10361	16030	484140	825546	8523	41164	11264	14346	3023262	84473	13866738	3175	7963	7172	139943666	247961	2198	2581	61851	133265	133395	849010	215820	266301	5787	725568	341774	1744934	15898	6752	898	535784	2242	1127150	2947	2337471	3904	12959577	1320571	4218604	137137	22201	9601	3232826	174264	2433
ATB-j7-exp2-plasma_167	5	24465	154	3656	7549	335265	1023123	5973	31322	10033	15449	2334114	59802	13822596	29	5138	8077	166529846	142546	174	2317	894	1062958	241579	1550382	272262	235438	5755	967724	212405	2791733	2311	2332	731	564631	1100	1174770	248	1817558	949	16513252	1383427	3627533	116735	9264	108	5046342	116809	2854
BARNECIELA-j3-exp1-plasma_198	NA	31186	312	5817	16231	414632	760510	7305	52063	9758	14084	2764661	46845	16444200	NA	6804	7500	120050458	105167	NA	2547	30163	95284	104096	1477732	220338	226489	3880	534265	177710	2896524	NA	5340	641	525535	5716	910032	NA	2092297	NA	14756639	1140703	2756571	149642	7850	NA	5440955	132772	1395
BURKO-j3-exp2-plasma_146	49	33900	547	6460	14000	739941	1321114	9289	59617	9934	16900	3810936	77758	16749323	7	6764	11436	155225755	172742	283	2457	8058	151303	171489	2228832	235106	264568	6618	874397	294366	1712820	3876	5574	740	593582	2050	1090774	298	2001886	481	21246461	1451755	4118778	193094	17901	183	3131651	203077	1897
Nacl-j3-exp2-plasma_136	313	30289	452	6794	10298	304809	315677	8580	58742	9521	20791	3208831	124819	17524673	9311	8514	9838	164827336	366907	6631	2341	62018	241734	169822	1799286	372334	311805	8286	718032	486635	1995842	52985	6469	604	666104	2588	1082813	6458	2145286	16052	14274129	1407083	4375945	258524	20603	16660	3668251	162779	3346
Nacl-j3-exp3-plasma_135	617	21796	1078	11220	33103	323441	663661	25336	290757	12091	21955	1266957	78616	9246349	6248	10039	7313	53106753	354093	6536	2066	41893	161418	48422	1419447	199242	103863	6468	610294	267846	1211878	29606	4620	3181	371148	2717	991269	3599	1259300	25988	15904705	609866	2697613	142131	13024	26848	2360218	101781	3268
MITSUAKI-j3-exp2-plasma_152	50	33478	466	5418	12455	707556	1242656	10281	154195	12027	15484	3091385	86354	16373018	81	7556	9951	132868445	232069	526	2694	1559	183808	169754	2136032	240960	274784	6500	993302	286783	2750050	26650	2649	684	605603	1823	1140888	481	2132852	2731	24923270	1255766	5698247	130786	10471	253	4981532	191750	1601
FECES-j3-exp3-plasma_148	16	20440	721	7038	21839	523405	1510343	20525	308154	10818	26885	1363419	53466	8554134	393	12871	8559	46630326	217103	1544	2056	1801	147766	94744	2232051	149645	144912	7347	704742	165423	1151404	49029	7029	2824	520879	5319	1021622	1041	1292325	1318	21109322	770038	1775013	120561	17411	140	2227702	175115	7610
BURKO-j7-exp2-plasma_174	7	46319	556	6423	12516	565400	881826	10559	42211	14338	15517	4109443	124731	25341135	5	5971	11008	192916254	340638	910	1899	43520	174058	148067	1579225	467802	339365	6055	816596	476837	2080837	3227	2538	810	513605	1217	1045057	322	1721008	767	19932442	1718616	6976078	229538	21902	2328	3860982	277367	2873
ATB-j7-exp3-plasma_165	25	22909	603	6070	20608	424828	1201302	19425	332644	11634	19366	2193301	39431	10316475	34	9664	5726	63589014	168446	84	1910	706	152218	83615	1597202	220458	138785	5945	731436	144031	691864	633	4625	1427	428928	2061	959124	134	1231924	394	17542971	972772	2180513	182778	5869	340	1310795	118555	9989
ATB-j14-exp2-plasma_182	28	22829	586	6395	25129	243672	732489	8372	163188	11534	11389	1531823	62881	12564393	27	8026	10905	112263775	167088	84	2473	1120	170132	118279	1665660	221944	200361	4586	706199	187424	3046074	936	5465	741	576248	4239	1113316	125	2000362	131	14210485	1218145	2867384	141952	8245	430	5243205	93365	824
AKKERMANSIA-j14-exp3-plasma_195	510	24830	426	8401	14867	268216	457513	21753	54841	11970	17000	2856396	62535	14401202	6506	9345	6200	89727265	279777	4665	2007	37707	127978	66853	1106723	314229	242339	22215	466820	249183	603655	18932	3879	3409	360880	2113	885743	1529	1363425	11226	10175580	1205721	2756238	344008	15939	11112	1136282	115036	8333
Nacl-j7-exp3-plasma_159	174	18943	1727	22990	15782	299274	992879	19321	84034	11923	24038	2306926	50170	7955294	1055	15970	7526	59901436	199687	736	2333	21648	233484	65082	1060972	161107	160285	6970	760654	292440	746215	3569	5916	2841	428907	3071	908809	871	1563547	4135	14320463	564776	2639704	177616	12089	10814	1453009	148507	7011
MITSUAKI-j7-exp2-plasma_176	1011	28543	430	4890	17088	618525	1195130	11175	128805	12320	17180	2193930	100421	16461082	3747	13285	9134	116022681	248454	5301	2668	3448	151388	153630	1705269	188187	314386	6736	794109	364230	3052978	59019	5428	933	595847	2779	1121175	1763	2154301	31659	18874568	1135198	4450961	98376	12395	16504	5504189	191053	1571
ATB-j3-exp3-plasma_141	10	23280	463	6821	15612	253117	465568	17392	69116	10879	19674	3086973	52857	12477348	13	5816	5484	103263839	238145	58	2029	751	168880	99547	1122187	410421	130294	6075	596562	185700	889760	595	2295	3111	360928	3286	879996	79	1399135	649	10558350	1304432	2945120	215472	6185	51	1761989	146293	10028
ATB-j14-exp2-plasma_183	35	26589	517	4342	18172	335396	998085	9604	142003	14402	11871	2804663	82030	13091887	5	6389	8263	122551976	209477	24	2316	525	234121	196562	1943536	229026	203674	5764	814345	181016	1441884	488	3675	738	565000	1784	1121426	36	1991642	163	20000443	1401404	3177817	196237	8057	289	2706503	126009	1838
FECES-j7-exp3-plasma_172	52	24969	592	11002	22861	707054	1006433	17065	102717	10441	14731	1872562	46821	11481305	1163	13405	8326	85138956	188849	2348	1936	26700	198210	78138	1059099	209469	180191	13094	474377	187184	972116	40683	3942	3043	373476	3159	902124	1636	1313498	1235	16268529	716186	1996633	132931	10636	95	1897581	227290	6452
BURKO-j14-exp2-plasma_188	39	28351	184	9551	10217	323911	588150	8713	34467	13308	9814	2236938	64607	14979430	17	10410	7138	114222183	168050	120	2036	2780	304743	159912	869063	201815	217037	4639	722980	200986	1860347	4973	8313	925	581303	3146	1139408	371	1850263	3326	13781255	1015928	3560630	138890	13832	160	3454900	197618	1463
AKKERMANSIA-j3-exp3-plasma_154	74	26242	775	48611	16191	349239	1053708	17154	160065	12192	19277	1913230	42431	9535080	57	10915	6557	73913199	214937	767	1859	855	152961	75109	1042212	245530	96276	5943	676320	114541	773608	16032	5559	2465	431711	3378	985942	798	1195684	799	14730227	905220	1987916	151749	11031	142	1429237	127371	8975
MITSUAKI-j14-exp2-plasma_194	41	31163	597	5578	26326	418269	726858	6444	240199	16916	14094	1823917	93356	14527261	1533	8373	6433	68731269	315581	2167	2285	12255	683251	205733	1599609	195836	119756	4410	722031	218862	1976913	10107	3787	689	545638	1923	1122484	2157	1955247	14409	17408287	877076	3171501	461498	13975	15329	3677249	128459	1412
ATB-j14-exp3-plasma_182	15	26341	349	6234	12737	210732	427657	19847	58709	10881	17068	3521047	42056	10925053	15	6459	7466	100546208	145103	127	2098	897	131785	113301	1331144	243507	234939	7379	465256	204352	1187280	598	3834	3095	322365	2321	844243	33	1502286	427	10504928	1281472	2460991	136385	7581	61	2263700	106571	10457
ATB-j3-exp2-plasma_143	6	24006	397	5373	13985	544596	1369539	8060	137790	10300	12757	2166158	76949	13550883	30	7801	11193	120262397	157267	51	2277	951	198103	175551	1817545	181796	231543	5882	919588	249957	2584508	427	5443	1058	632812	2812	1118123	79	1826691	150	21898092	786122	3245197	129068	10782	236	4807879	131872	1045
FECES-j14-exp3-plasma_191	34866	34972	355	9863	27542	482068	1393750	20616	187043	11491	10926	1623370	66997	15984703	1430	12486	7675	68074253	258524	107488	1502	17744	76620	50898	849362	538300	284546	6316	460435	425915	610472	669288	29113	2766	358833	3838	860154	140133	993612	967187	13798826	1002480	2389247	189278	15043	106386	1183599	105457	3948
BURKO-j7-exp2-plasma_169	19	26430	416	10730	15634	329078	568993	6984	56065	12175	11230	2415881	95255	14158706	11	7035	6047	132023663	285852	1892	2402	15689	274535	115253	1073388	242634	146994	6081	578274	316348	4224737	4039	5640	400	516224	2491	1092759	555	1939936	711	11364605	1291246	3738339	155647	20311	9006	7575697	175004	1926
ATB-j7-exp2-plasma_168	15	27406	429	5148	15384	386733	921893	7748	197927	10162	14591	2593076	61390	18169993	59	7273	8899	153961618	120215	11	2334	1096	152354	139748	1850620	264307	299667	5312	733979	224461	2235632	231	4822	573	602440	2881	1123858	28	1837586	112	18160530	978404	3443845	173082	8969	62	3994944	111719	870
Nacl-j3-exp3-plasma_137	317	22894	311	9622	34823	541845	643712	22038	77278	11801	20379	2659606	82468	11181102	1683	8792	10035	83234218	365834	1804	1935	51015	253246	109592	1051036	211826	186637	6634	658300	409133	1440737	10600	3305	2549	366282	1903	1034483	594	1376244	7457	18227281	842444	2759933	191277	19643	8276	2802628	135191	9543
Nacl-j7-exp2-plasma_157	110	25725	291	8640	9749	384431	635771	7036	24060	12732	18603	2732189	101096	16485612	3889	6307	7416	116256163	221610	3527	2726	67921	290639	143068	943337	235984	238565	5826	837115	378097	4278340	16572	2752	507	582308	1780	1168690	2453	2166881	6123	10131547	966611	3717350	103852	21025	12723	7712221	153891	2201
AKKERMANSIA-j7-exp3-plasma_175	25	24807	685	6352	13847	364807	512205	20066	49680	10572	16548	2934698	57561	11238150	1481	9722	6965	121127490	254408	1072	2278	19674	163041	84246	885390	288203	157157	6135	485275	176195	943832	35818	4819	3171	344302	2283	877596	2447	1421446	1341	13341017	1147172	2390413	191003	6852	313	1834539	123516	9656
BURKO-j3-exp2-plasma_145	48	29547	502	6575	11277	455924	740268	6807	50394	8596	22144	3729686	65383	18270201	21	6508	9297	170697715	141101	482	2372	7594	114048	162628	2738178	229306	265301	8374	850724	256239	1632430	24576	4588	736	584628	2340	1091755	448	2046216	6143	15433011	1438263	4381383	176111	13413	2108	3065166	223408	1633
FECES-j7-exp3-plasma_169	208	29431	447	12687	24004	819059	639983	17461	92995	11379	17066	2041858	71548	11790893	10903	11303	6874	88339869	300736	7605	2419	18745	192071	89791	1067917	238507	179843	9387	462770	251929	720118	255475	2709	2251	358803	1438	898886	9805	1399875	3721	16346940	942175	2870042	171269	10011	128	1362523	309077	7406
Nacl-j3-exp2-plasma_133	952	27659	456	8523	15444	517307	1053183	7091	184164	11291	18879	2153470	91213	16747855	5616	12359	10375	121816149	225847	11479	2535	83058	119760	169952	1657468	227558	285750	8324	798741	324675	2496329	28178	6735	610	569850	2700	1089400	3334	2204455	33478	23944597	951510	2974738	252437	24677	41856	4602310	163411	633
ATB-j3-exp3-plasma_140	3	23940	495	6159	21905	246400	639688	15874	99790	11779	25438	1841397	44258	10078383	12	6931	6808	71691912	180172	127	1994	757	156125	89899	1349588	211594	147994	6676	700301	157320	901893	221	3024	2409	388825	2878	929029	127	1377520	643	11681511	939441	1684514	155593	6399	239	1756183	104155	7481
MITSUAKI-j3-exp2-plasma_151	405	31959	340	4012	17652	700804	924559	6486	117759	11713	24292	3119482	85844	20035312	1378	7578	7214	143253054	163727	5412	2233	900	191597	160271	2852886	204304	288143	8441	838340	295702	1892517	192541	3223	568	610946	2291	1136054	1765	1785919	13169	17546929	1441155	4159531	170006	9226	154	3263474	185558	1289
AKKERMANSIA-j14-exp3-plasma_197	257	21989	52	2011	5877	353915	728656	8813	80019	10260	16843	2238918	47732	9071619	2429	9160	6807	65119550	202292	1769	2083	67397	162849	83230	910301	195294	190596	6619	473489	204235	860064	11029	2829	2348	364079	916	879005	1982	1365336	11038	14576773	802223	2128824	148297	15067	3763	1669920	126147	8425
Nacl-j7-exp3-plasma_158	237	22459	2216	25824	14517	311745	889997	12097	42779	11141	22845	2701736	63963	9248118	1037	9182	8097	68350850	291913	277	2420	37580	149018	91744	729028	232213	229671	6623	772489	295417	795516	2371	2381	1506	405318	1849	978716	1191	1601635	2663	12183618	718131	2512842	155224	10660	11410	1502791	162449	6717
ATB-j7-exp2-plasma_163	7	31512	346	4644	15340	336785	940093	7449	76812	10710	26479	2928830	55335	15149519	15	8573	7257	165090149	132544	71	2589	748	533198	194098	3985471	240650	211487	7913	855603	204501	2208647	542	9349	598	693645	3960	1139783	81	2113567	218	15498521	1610554	3838170	141173	8543	90	3957698	128776	1972
FECES-j3-exp3-plasma_146	25	24512	789	11455	16967	424635	1054573	16641	145615	10179	23000	1928803	54931	10291426	25	9590	8007	75151602	231129	1648	2088	1001	155787	113192	1559713	163721	165347	6556	694079	161749	744692	45435	5558	2451	416346	3118	937336	757	1394698	990	21116118	1046865	1833141	131709	13302	250	1378131	196262	7196
BURKO-j14-exp2-plasma_187	178	23674	613	6027	11300	334446	580412	8367	42261	14628	16898	2906733	96643	19178097	1967	7338	8184	102849209	169025	482	2071	4268	219311	161751	2474131	210944	233084	7945	818556	294736	6817250	22632	3945	622	596747	2113	1247084	1068	1837434	8396	12476992	1202410	2932065	116505	20810	223	11935538	146613	1795
AKKERMANSIA-j3-exp3-plasma_152	26	25097	734	52913	31559	524889	1035603	15097	187698	10368	22962	2368100	67010	10111898	566	10882	9398	71855563	265842	979	2185	881	136072	112482	1570087	208571	147250	6855	728098	171789	1133311	43673	5917	2605	461333	3601	1043858	555	1351145	629	20503929	1094151	2146063	230076	20901	100	2203730	171780	9787
Nacl-j3-exp2-plasma_138	1751	27880	337	10495	19943	559149	991128	8185	66803	9142	15108	2631942	106712	18176885	4471	8685	9680	145493625	262752	8045	2696	70785	156490	155968	1472513	235508	315567	7161	801903	407374	2533138	53408	7993	691	571336	2189	1103421	3858	2192947	38559	18351346	1148161	5055121	251999	26949	22073	4579334	164970	1781
ATB-j7-exp3-plasma_164	6	24093	342	5978	12576	260702	699745	16398	55167	10707	26282	3115530	53178	10733889	15	7200	7041	95597527	178069	375	2322	997	149165	158403	1866671	248389	211511	7676	803644	175947	690909	1784	4389	1814	419166	2267	963503	622	1493051	197	12930712	1484774	2365015	166933	7095	162	1281534	133899	17830
ATB-j14-exp2-plasma_186	51	23588	455	5222	22384	521644	1755111	8194	255165	16121	8312	2348826	78306	13311802	5	6491	8980	115286903	185132	142	1968	947	214927	160644	1413437	231840	213106	4483	751813	215459	6857396	678	3539	714	596267	2070	1234660	101	1781533	65	28055417	1070398	2788984	204248	10608	134	12153913	127114	2233
Nacl-j3-exp3-plasma_136	488	26048	1473	25123	30274	415743	1297149	19567	172864	10824	19617	2279902	91665	10743886	3757	11424	11335	80378040	389789	618	2188	29109	141464	114226	1182349	226187	222056	7781	747282	464998	1446701	9408	3938	2276	389191	2664	1027060	957	1465921	4294	18160920	781167	3350236	133740	12750	10281	2729064	137961	3687
MITSUAKI-j14-exp2-plasma_193	23	29020	605	6169	10591	300282	644944	7620	63725	14200	11785	1936785	77478	13069360	1542	5919	6916	111394396	229639	1131	2332	20747	491615	208996	908821	212132	165282	5848	624896	202158	1556607	7814	3771	717	557019	2222	1112728	2469	2196245	5587	14285537	990038	3300871	127288	10215	11970	2914722	121444	1243
AKKERMANSIA-j14-exp3-plasma_193	163	23773	376	10344	12869	275120	450272	18764	48895	11181	16307	2143324	58765	9398450	5324	7649	6510	71308710	251069	2592	1896	34764	207980	102860	718864	176332	136739	6662	480370	272613	771931	20205	4698	2191	333809	1861	869931	1665	1451312	6210	11382711	975702	2652806	175346	17779	10454	1465126	108908	10718
MITSUAKI-j3-exp2-plasma_155	76	35206	469	5369	12319	665110	1348987	6541	95600	10956	19210	3348002	81773	20005092	7	9299	12231	167665545	160501	656	2320	1089	165923	176358	2096410	227956	341635	7188	897063	317370	3068440	17083	6013	627	673814	2963	1253589	327	2090868	3004	22887988	1200008	5212712	92126	10246	273	5533563	189636	1083
BURKO-j14-exp2-plasma_192	280	35250	48	321	1207	536334	986051	2084	12735	14183	12643	2105093	84654	17914257	956	1296	10158	125622025	230744	877	2543	2804	211382	183162	1212744	302940	281132	5966	635868	242401	2406430	17199	247	841	723838	204	1169638	682	1859947	11396	23897210	1167504	4295190	200789	17812	359	4402858	181863	1100
ATB-j3-exp3-plasma_143	29	23913	568	10122	21434	315308	910763	23191	169126	10977	26678	2239884	40804	8212168	44	4839	5798	63097018	166180	48	1588	940	157958	112891	1702980	227966	127078	6806	668025	149902	832105	18	1760	2312	382327	1801	906164	36	1380439	201	14193429	951024	1920313	149808	6108	178	1610713	123370	8009
MITSUAKI-j7-exp2-plasma_180	810	29134	582	5358	21635	707585	1155333	5886	198232	11798	14384	1783457	87442	20904281	117	9283	9640	131072043	214112	4725	2147	4437	170207	154215	1286315	195106	286230	6042	758122	290373	2113248	54411	6274	703	659687	4006	1129908	825	1790906	31657	26373938	1227768	2942216	109791	12214	69892	3860742	165182	775
FECES-j7-exp3-plasma_173	161	26757	362	6340	20212	646161	497028	17354	257252	9167	16242	2134556	56987	11051858	3253	11601	7908	81918481	252879	1138	1786	10173	167917	85431	1342890	266607	179813	7402	519526	262583	888291	96186	3143	2549	359104	2657	904472	3192	1534604	2566	15507654	882324	2424291	174111	8335	188	1602584	219999	4588
BURKO-j7-exp2-plasma_173	33	33459	322	10082	14734	436187	622412	6142	46612	14458	15404	2932218	113756	19791963	4	8995	9716	165548827	250185	1790	2778	45834	216703	183034	1597171	264612	334662	6576	923087	469428	2036097	4687	4902	682	590175	2387	1196138	109	2067801	1201	14353506	1373349	4460882	140011	22640	6894	3784414	180656	1430
AKKERMANSIA-j7-exp3-plasma_178	36	23892	382	6041	10318	370650	549564	14533	47951	11125	16402	2850546	59173	10601105	64	12325	7686	95212973	233462	855	1983	34470	184053	128184	1014524	261726	175211	7850	513030	209893	1020815	19676	4082	2521	373874	2867	954192	839	1453970	941	15110425	1136102	2832358	160549	10986	258	1909979	136460	10823
Nacl-j7-exp2-plasma_162	670	27261	419	10932	23674	733879	1935625	5307	182467	11701	17324	1641591	95062	15585275	4007	10862	10025	116978818	250595	5625	2652	44503	156486	153953	1627905	164142	211599	8276	772954	282763	2274952	24454	8045	610	694014	2911	1200195	3499	2318075	23400	25963800	969458	4228954	175405	23517	47016	4188326	202074	718
ATB-j14-exp3-plasma_185	14	29381	129	4108	10499	258983	1017501	14732	66763	11119	10361	2689112	46826	11859675	14	7181	5243	99937104	138857	180	1383	851	128461	140076	626279	484750	253294	5814	432459	297224	662855	1745	3674	2573	354103	3887	914706	179	1139402	600	8608880	1132703	1826190	36216	7622	220	1276638	99529	10848
MITSUAKI-j7-exp2-plasma_175	859	36170	651	5497	22740	800860	1210116	7208	59081	14654	17937	2980745	149410	26818602	8052	10819	12048	180231180	373746	13837	2488	12744	192122	211990	1644224	365691	365362	9597	848919	601985	2102342	84700	5946	1375	651405	2915	1213721	715	2118194	33440	25077635	2178476	5231505	230229	14077	54296	3769588	229806	3630
Nacl-j7-exp3-plasma_160	548	21850	1926	24218	15275	418746	1163211	14841	85962	10175	25284	2838950	73999	10716898	1864	12217	13224	70585993	243883	326	2612	22704	174389	151917	1300046	179210	314538	7498	740736	478301	654159	4348	4423	2496	395033	2553	923999	1054	1759701	6557	18602091	661991	2038416	140749	14199	22336	1238590	188859	4674
FECES-j14-exp3-plasma_190	1049	27030	436	15221	14482	515028	887584	19910	52766	14521	30016	2726020	63027	12239769	2524	9569	12320	95761100	212963	6485	1896	66639	142796	123895	1424379	162677	291436	7389	447138	341433	826667	53230	5445	2544	341101	3143	864634	4248	1349448	17269	14462863	723736	3103648	135176	17751	22432	1567974	162582	9810
BURKO-j3-exp2-plasma_149	93	38399	464	15140	19861	726094	1859860	3927	104702	12397	17478	2737952	82038	22241930	20	14912	11322	137100843	181247	2681	2697	25733	158358	209653	1211732	216188	267431	5980	1014659	262249	2390807	32998	8564	934	686178	4040	1193887	346	2344736	8954	30742199	1471817	3964170	192928	17653	16785	4351996	285121	906
ATB-j7-exp3-plasma_167	292	23391	355	5512	12137	250229	696917	16229	54051	12154	24483	2074205	38653	9147314	20	5364	5553	77958988	126089	1534	1994	747	140041	121928	1270500	204755	105850	6377	670075	117298	736226	14696	2300	1948	416503	1806	1024493	614	1429327	36511	10928114	921973	2317035	139945	5973	617	1406377	111438	7006
MITSUAKI-j14-exp2-plasma_198	70	35322	616	9537	12498	516890	772106	5656	53117	10653	12752	2044267	111011	12959206	793	6875	9306	111850734	309621	2071	2171	37831	601711	273408	1391823	204235	250637	8798	735405	373061	4137889	12266	5116	768	594881	3121	1373513	1614	1909782	8413	16743213	1160090	3458606	164889	18610	14029	7469189	148543	2358
AKKERMANSIA-j3-exp3-plasma_151	21	30425	221	39947	15252	362304	781131	13517	98506	12597	20787	2576624	55030	12248956	38	6241	6198	68520242	219116	892	2046	816	133643	112652	1019394	205116	119328	6114	815017	149903	1421152	20297	2287	2364	436035	1984	1024255	540	1376675	537	14277364	1050799	2025906	226239	21980	195	2724591	127312	8064
FECES-j7-exp3-plasma_170	50	25474	197	5822	4949	594704	725381	9626	53977	10660	16788	1965251	56572	11472887	1008	8697	7278	87216694	223055	2055	2109	12078	170293	92636	1222462	243313	170385	7454	468976	196052	514626	35630	2620	1528	355327	1203	908903	3144	1455187	1488	14990832	1041230	2974010	147652	9378	87	967865	264748	11793
Nacl-j3-exp3-plasma_138	1139	27401	617	8881	23112	514797	822585	14764	350765	10862	20036	1841198	92986	11227279	4837	10551	11123	64961647	452870	4471	2218	47987	128906	107517	1296017	259934	211971	6096	591579	307958	840252	29396	4672	2060	373192	2424	941624	2815	1473679	18180	20436796	907170	2583965	275985	18537	23304	1575183	131372	2491
AKKERMANSIA-j14-exp3-plasma_196	505	25121	859	14219	18269	317378	362150	13337	89493	9031	16279	2144509	70686	11884614	4134	11274	8897	81751760	301809	4877	2025	46904	253405	90346	949109	300513	270496	6192	496551	323789	638951	27496	4624	2078	342199	2352	855069	2363	1358871	11651	12324568	976898	2679790	137671	19064	21623	1173961	114214	7418
FECES-j3-exp3-plasma_149	36	24590	479	7327	15894	425063	1093037	22616	228086	11639	19652	2304246	50428	9344747	29	9657	9704	69101485	172122	1147	2154	1284	149385	121944	1446342	210523	190388	6062	727311	189706	1034336	30658	4016	1955	467991	2317	1078013	830	1341983	773	18997448	852034	2195696	159723	12813	138	1952083	137936	6239
ATB-j3-exp3-plasma_139	23	22151	438	5982	39769	286575	792301	17696	229319	11885	30206	1526859	40681	10968411	6	8696	5848	76667668	146276	54	2361	956	141223	103094	2088287	170509	149058	7011	661850	150451	911083	193	7854	1816	444035	4349	968001	106	1477258	430	14055986	1067006	2459976	186273	6977	247	1750995	87169	7283
FECES-j14-exp3-plasma_192	1077	26572	716	10341	16364	367825	729176	17845	420984	12931	17957	1170933	60432	11513041	4033	12823	7777	61273732	285136	5654	1858	41616	91347	63199	1369253	220644	147584	7279	440778	227341	799909	45018	4139	2209	382957	2116	895377	2269	1299366	24054	16332948	969444	1909961	171648	12476	25878	1528145	100423	1889
AKKERMANSIA-j7-exp3-plasma_176	37	29667	422	6059	7195	307419	395569	11472	25983	11487	14927	2993677	59118	13015802	689	8590	5895	100666848	257120	1181	1985	23179	345978	111128	883315	297758	137124	5997	516972	171440	1085473	21692	2239	2265	320292	1961	845384	1667	1377399	934	13164518	1368394	2359893	281999	16300	251	2090431	124757	10108
Nacl-j3-exp3-plasma_134	938	28806	246	5954	14428	338234	401994	14312	72718	10935	23411	2944337	62247	11879127	8107	10499	7382	100433738	239633	5703	1968	55678	332009	103215	1043354	366133	247795	6766	819421	344538	1098764	34311	4165	2013	400688	2413	1166106	3583	1472718	25190	13122528	1256305	2276287	177618	12994	32826	2005196	113696	12750
ATB-j14-exp3-plasma_184	24	25414	136	5925	9718	247288	655446	14066	27158	13076	15246	3353088	45759	9968187	10	5866	6186	87622015	175478	99	2142	2328	155238	140680	977170	252212	172915	6433	459193	183377	842046	273	2353	2056	357640	2282	928558	55	1546418	657	10863419	1408135	2336572	127261	8570	145	1603489	122852	12354
AKKERMANSIA-j3-exp3-plasma_155	20	25637	197	28909	25795	945278	1272056	15395	223696	11841	23433	2710275	42258	10681827	1721	10870	8705	78732196	158505	1722	1668	1288	143110	117872	1619708	201387	193259	6773	857102	217731	1019106	71726	4839	1869	445390	3005	991652	2219	1425083	917	22974324	1140098	1619214	252657	22719	203	1943030	141291	12948
FECES-j7-exp3-plasma_171	129	24088	339	5748	19075	627827	582286	11978	224396	10876	18762	1829819	45027	10892054	2890	11653	9168	72082847	131530	1632	2270	15741	231092	117427	1404706	184671	205647	7482	476050	181700	894010	60834	3496	1617	357459	2309	940370	3849	1514241	5222	16700612	790133	1886564	171303	6555	364	1710011	245456	6287
ATB-j7-exp3-plasma_166	36	22947	267	4440	10380	269665	673369	10161	68139	10887	22783	2494056	41896	10568260	19	6514	6117	85639912	147202	79	1827	278	139472	122073	1243575	278650	195444	6291	726570	145913	734995	495	3053	1651	412376	1973	970616	40	1320128	558	11748525	1260746	2343082	160830	7111	310	1399681	115034	11919
AKKERMANSIA-j14-exp3-plasma_194	320	16915	393	9976	13525	459526	570137	8857	37894	11364	16442	2290506	56755	9806194	14233	10526	8402	80572521	226398	4508	2125	89520	96706	126305	765819	193451	174031	7894	504604	224507	916198	82009	4274	1937	350435	2374	949155	2839	1513320	17526	13833588	851683	2413105	111331	26214	864	1696000	161559	10261
ATB-j3-exp2-plasma_139	27	24779	NA	NA	NA	232541	495243	NA	NA	10607	15924	2335285	60246	12334271	19	NA	6364	127721267	136099	129	2335	921	148539	148697	2516579	172815	165646	5569	697083	176117	1974479	511	NA	416	668222	NA	1086863	196	1993976	424	10953422	1019479	3515006	116518	7030	124	3466785	110196	1208
Nacl-j7-exp3-plasma_157	1623	24908	2210	22359	11887	311478	747208	12546	58670	10345	27913	2957285	67202	10338976	5626	10442	10172	66443848	240413	2126	2590	53250	193739	120000	973739	177196	270588	8499	852502	409303	926695	17437	3282	1517	413014	2254	1015790	2159	1714179	17910	13421979	812956	2259695	165751	12920	14715	1779692	165069	5119
FECES-j3-exp3-plasma_147	7	20146	562	6275	15828	464301	1149781	13036	238509	12026	26143	1762756	51483	8697467	1006	9608	9726	69198789	175253	3154	2094	1308	168790	138003	1575899	180535	161256	8728	665295	170046	922774	80561	4827	1649	444115	3006	1030605	1313	1445012	1569	18293659	903669	1880976	132924	15247	190	1785237	150342	7960
AKKERMANSIA-j7-exp3-plasma_177	6	27075	635	7668	9252	364461	403321	10850	49190	13072	17968	3336459	65835	12395085	1644	8446	8243	102067771	255487	763	2370	37097	169590	122648	1157526	331505	207444	9038	479980	280528	1901471	42752	3863	2106	404727	2680	991149	2033	1615790	1600	13191481	1228703	2836359	201489	12376	135	3637322	123936	9499
ATB-j3-exp3-plasma_142	20	19302	278	5076	15391	257693	584161	13113	121202	10717	23653	2583375	42918	9965149	12	9127	6657	67647056	130952	67	2011	750	140767	141302	1556194	210947	215134	7532	708580	205310	884568	632	4230	1924	412123	3661	991821	47	1460797	501	11069773	1007002	1956543	145171	7183	210	1574379	112943	5830
AKKERMANSIA-j14-exp3-plasma_198	170	23529	19	1262	1059	396367	773678	4270	50226	12095	19047	1674331	18877	11224375	3966	5959	5365	54680425	16987	4182	2304	58809	220338	105150	888442	145936	151470	9345	518632	124697	1168547	28295	2863	1813	458763	1102	1065854	2231	1626909	7790	16294495	545117	2231485	173655	30140	9125	2187118	182465	7144
FECES-j7-exp3-plasma_174	42	22593	483	8763	14339	804969	959635	8374	168436	12354	15489	2102005	39187	10215717	39	15797	6366	66058527	174960	1252	2124	15446	217682	104351	934829	230025	141802	7832	463746	155794	832123	23319	5030	1911	379224	3004	941182	1296	1412910	1315	17852176	866583	2315941	139510	8415	161	1619592	204720	6533
ATB-j14-exp3-plasma_183	13	26290	77	2009	4100	302545	788813	2701	23896	12783	21114	2993492	43613	10634151	3	1324	8296	82295662	115274	122	2330	1265	174217	166810	1418354	222573	242078	7610	544162	194291	1101712	924	611	1585	388577	2424	993502	102	1583201	672	14886807	1354764	1923650	179724	8220	89	2121910	101502	11181
Nacl-j7-exp3-plasma_162	4144	29700	480	8154	30286	706849	1268189	5654	229200	12460	19531	1973707	102600	14074402	22015	19453	8917	55002418	485860	14004	2091	59706	132945	97211	1057327	212062	214815	7866	877219	633101	909520	74633	5849	1763	504611	2558	1108352	10094	1429773	39028	19785270	1189658	2219726	364029	19007	37194	1745003	172553	5568
AKKERMANSIA-j3-exp3-plasma_153	44	24037	385	35128	22143	485373	1304002	7780	302626	10732	21172	1671452	56851	12105905	26	12625	7473	56650597	233382	1230	2004	1370	172176	112377	1598983	224722	176318	6838	860751	177320	1684713	29659	4260	1666	488115	3255	1027928	484	1359063	1006	21877478	1138933	1644705	165774	19344	133	3192580	148806	7954
ATB-j7-exp3-plasma_163	7	20695	508	6682	14772	257379	643828	11851	134799	9977	20117	1768960	39953	8984381	36	6487	5671	72549579	158340	97	1645	674	151188	105688	1220638	232936	131463	7686	813679	132520	1262868	267	3144	1171	468463	2739	1089210	91	1340596	627	12122314	1036228	1675510	191868	5980	111	2378703	98310	10168
FECES-j14-exp3-plasma_187	833	30495	539	6796	11767	288096	412831	9765	311539	15016	17276	1931897	59168	12316969	9085	10841	5717	52885859	241663	4863	2281	36309	104373	78808	1282119	292347	172805	6927	459184	318418	988111	36941	2985	1670	367730	2157	930620	2739	1572099	21575	9871492	1023121	2617188	230603	11988	20077	1892443	83370	3914
Nacl-j3-exp3-plasma_133	438	31163	679	7581	12150	318898	469150	8763	164708	12048	23691	2251049	77906	13491670	2867	8701	8909	60806298	368641	3865	2753	56354	149607	99835	1336723	259463	228874	8916	759621	300456	1097142	17521	4549	1592	430572	2698	1124704	1181	1595801	7026	15703271	1222616	2810931	188957	18938	19352	2043434	108545	3895
ATB-j14-exp2-plasma_181	73	36098	NA	NA	NA	308840	766813	NA	NA	11965	10429	2345478	60244	19724164	23	NA	8957	166476441	127917	229	2337	687	137977	175323	1387398	568899	319378	5279	790401	403390	2347867	2845	NA	695	573812	NA	1107181	170	1883288	287	13174344	1429007	1731892	58530	10730	197	4275853	106599	952
ATB-j14-exp3-plasma_186	42	26119	429	6260	11919	250864	788138	10676	157089	10145	19218	2338433	39171	10677062	27	8564	6884	79127955	112946	90	2020	556	140663	122424	1133211	215806	186654	6738	495048	150195	712087	154	5253	1715	385486	2996	950408	12	1601295	695	14058873	982964	1795182	107408	7564	160	1352710	99541	6795
AKKERMANSIA-j7-exp3-plasma_179	16	22123	564	6761	9836	404290	679196	9033	115051	12542	17350	2083681	63108	10487730	3040	10396	6680	72851778	189986	1636	2020	30599	183776	128541	1294051	173279	140560	7792	525024	172263	1410214	55185	4434	1992	368869	2663	920848	2762	1435270	1383	16340121	1132772	2352040	146308	10552	232	2698575	122127	6263
FECES-j3-exp3-plasma_145	36	22608	410	4941	18487	327270	741784	9105	96824	12819	24368	2248854	60822	10209817	28	7533	5290	74438237	144990	1256	2166	810	78236	108572	1344340	228264	113849	7367	705401	136209	2333097	21693	4227	1659	401339	2845	983392	651	1578448	733	13451254	949988	1421303	152720	10979	122	4239543	107094	11848
ATB-j7-exp3-plasma_168	3	22270	223	5178	16542	297586	812136	8990	139638	11518	24628	2102675	36731	9466963	47	7626	6524	67602736	119208	188	1811	1006	130197	104640	1998501	223315	161585	9022	756618	154020	987418	788	4081	1597	464067	3112	1074919	37	1579509	178	13008798	1109649	1628319	166082	7201	102	1672381	103361	9963
Nacl-j7-exp3-plasma_161	2135	29316	2268	26804	15695	400006	1184358	6282	143668	12015	22549	2617458	88282	11263546	4064	12038	9449	49658945	407914	1242	2383	15686	112282	76555	952892	219404	211606	7730	760874	340330	733964	9925	5051	1666	465227	2859	1009673	2367	1693114	16415	16886937	784804	3152573	201799	16190	23921	1280430	186027	2623
FECES-j14-exp3-plasma_188	135	28376	501	13095	10726	315846	510002	6023	56763	11270	19536	2518868	62806	13064891	2192	10295	7600	85715950	268022	1517	2091	57680	123578	105890	1348793	297682	238106	8365	521642	318758	943726	19933	3644	1963	378277	2239	1001270	1653	1433692	5352	12205850	1240517	2353936	146186	17536	9175	1761357	164587	5794
ATB-j3-exp3-plasma_144	31	27795	368	5695	11900	397026	976075	7317	73557	11445	26526	3126339	48388	13120408	21	9131	10984	104861853	145650	51	2486	928	164714	146744	1850550	312682	252198	11497	788411	229256	1322713	342	5857	1268	484753	4126	1072129	31	1625608	331	16677467	1381871	2428929	157633	8567	333	2473530	150835	11305
AKKERMANSIA-j3-exp3-plasma_156	211	24391	310	38332	16620	534490	1180377	6252	137919	9578	23105	2086507	55252	12983063	476	9807	9506	71271937	173487	2271	2114	1173	144663	131951	1145214	261005	211968	7026	856349	195077	1166183	28869	3179	1346	459261	2100	1077139	558	1505067	3100	21246492	1041368	1331933	155875	18225	1847	2216147	172983	9744
FECES-j3-exp3-plasma_150	10	23810	761	6408	16021	467060	1240986	5100	197799	10041	22808	1249930	48961	10525058	226	9679	8645	50222691	185752	1094	2351	1568	148380	110515	1385356	159319	165174	6881	810550	167375	1068544	22201	4590	1910	474381	3068	1058633	614	1550272	943	21773597	805747	1732030	118979	12067	191	2004654	133300	5472
ATB-j14-exp3-plasma_181	41	35874	345	4709	8874	271426	585321	6468	39127	9427	17497	3928813	52695	15526187	8	6265	7430	141775500	168036	138	2771	1524	147327	138275	1314932	386983	246570	7269	520276	234016	1240737	417	5367	1145	413377	2962	1018626	169	1731529	593	10683785	1795325	2995353	115605	9375	252	2318810	144127	13178
AKKERMANSIA-j7-exp3-plasma_180	17	20074	440	9877	12654	398396	672650	6343	109762	12364	14039	1878631	46151	8499410	1634	12978	6102	62092397	180449	1728	2113	15352	142952	113368	906799	136306	130249	7595	490019	155421	1005049	34468	6896	1124	412869	3955	969871	1542	1433054	1495	15312281	803171	1342826	94923	16107	217	1922236	139576	4869
FECES-j14-exp3-plasma_189	2137	32990	641	10169	12989	536512	810475	6644	215353	12117	21316	1948887	97909	19458572	9027	11249	9444	42857351	169545	8622	2174	62120	120927	133740	1293882	229683	251421	9289	504763	399399	1305065	57496	3993	1680	424344	3069	1104007	2736	1592447	22192	16299948	794331	2319395	225250	18796	24831	2189551	155991	5060
St_SCFA-exp2-plasma_pre	NA	NA	152818	179128	126963	NA	NA	15386	79683	NA	NA	NA	NA	NA	NA	19212	NA	NA	NA	NA	NA	NA	NA	NA	NA	NA	NA	NA	NA	NA	NA	NA	123219	NA	NA	141579	NA	NA	NA	NA	NA	NA	NA	NA	NA	NA	NA	NA	NA
St_PA-exp3-plasma_pre	NA	NA	NA	NA	NA	NA	NA	NA	NA	NA	NA	NA	NA	NA	NA	NA	NA	NA	NA	NA	NA	NA	NA	NA	NA	NA	NA	NA	NA	NA	NA	NA	NA	2265	NA	NA	NA	NA	NA	NA	NA	NA	NA	NA	NA	NA	NA	NA	NA
St_BA1-exp1-plasma_pre	2270	NA	NA	NA	NA	NA	NA	NA	NA	NA	NA	NA	NA	NA	149094	NA	NA	NA	NA	1973	NA	NA	NA	NA	NA	NA	NA	NA	NA	NA	NA	3282	NA	NA	NA	NA	NA	205375	NA	143278	NA	NA	NA	NA	NA	309157	NA	NA	NA
St_AA-exp1-plasma_pre	NA	70	NA	NA	NA	1805	5980	NA	NA	5933	29	1052332	1509	249244	NA	NA	1955	3026354	19	NA	72	280	460	3437	1815	33	157392	2906	1585964	946180	6180332	NA	NA	NA	254014	NA	412545	NA	478	NA	42661004	55580	75466	45537	1402	NA	12440529	1091	42
St_BA2-exp1-plasma_pre	90831	NA	NA	NA	NA	NA	NA	NA	NA	NA	NA	NA	NA	NA	646	NA	NA	NA	NA	6724	NA	NA	NA	NA	NA	NA	NA	NA	NA	NA	NA	775172	NA	NA	NA	NA	NA	345387	NA	2657	NA	NA	NA	NA	NA	44372	NA	NA	NA
St_SCFA-exp2-plasma_post	NA	NA	261305	231134	169682	NA	NA	14700	113840	NA	NA	NA	NA	NA	NA	15474	NA	NA	NA	NA	NA	NA	NA	NA	NA	NA	NA	NA	NA	NA	NA	NA	157215	NA	NA	175968	NA	NA	NA	NA	NA	NA	NA	NA	NA	NA	NA	NA	NA
St_SCFA1-exp1-plasma_pre	NA	NA	280899	293683	243856	NA	NA	17283	141522	NA	NA	NA	NA	NA	NA	25034	NA	NA	NA	NA	NA	NA	NA	NA	NA	NA	NA	NA	NA	NA	NA	NA	198041	NA	NA	214704	NA	NA	NA	NA	NA	NA	NA	NA	NA	NA	NA	NA	NA
St_PA-exp3-plasma_post	NA	NA	NA	NA	NA	NA	NA	NA	NA	NA	NA	NA	NA	NA	NA	NA	NA	NA	NA	NA	NA	NA	NA	NA	NA	NA	NA	NA	NA	NA	NA	NA	NA	1636	NA	NA	NA	NA	NA	NA	NA	NA	NA	NA	NA	NA	NA	NA	NA
St_PA-exp1-plasma_pre	NA	NA	NA	NA	NA	NA	NA	NA	NA	NA	NA	NA	NA	NA	NA	NA	NA	NA	NA	NA	NA	NA	NA	NA	NA	NA	NA	NA	NA	NA	NA	NA	NA	1252	NA	NA	NA	NA	NA	NA	NA	NA	NA	NA	NA	NA	NA	NA	NA
St_BA2-exp1-plasma_post	104012	NA	NA	NA	NA	NA	NA	NA	NA	NA	NA	NA	NA	NA	336	NA	NA	NA	NA	67	NA	NA	NA	NA	NA	NA	NA	NA	NA	NA	NA	788193	NA	NA	NA	NA	NA	144579	NA	2368	NA	NA	NA	NA	NA	8574	NA	NA	NA
St_BA1-exp1-plasma_post	2830	NA	NA	NA	NA	NA	NA	NA	NA	NA	NA	NA	NA	NA	180377	NA	NA	NA	NA	4439	NA	NA	NA	NA	NA	NA	NA	NA	NA	NA	NA	4344	NA	NA	NA	NA	NA	228484	NA	169832	NA	NA	NA	NA	NA	354230	NA	NA	NA
St_BA1-exp2-plasma_pre	3026	NA	NA	NA	NA	NA	NA	NA	NA	NA	NA	NA	NA	NA	164037	NA	NA	NA	NA	NA	NA	NA	NA	NA	NA	NA	NA	NA	NA	NA	NA	2713	NA	NA	NA	NA	NA	184028	NA	152919	NA	NA	NA	NA	NA	287743	NA	NA	NA
St_BA2-exp2-plasma_pre	91554	NA	NA	NA	NA	NA	NA	NA	NA	NA	NA	NA	NA	NA	66	NA	NA	NA	NA	NA	NA	NA	NA	NA	NA	NA	NA	NA	NA	NA	NA	697751	NA	NA	NA	NA	NA	102084	NA	1737	NA	NA	NA	NA	NA	5925	NA	NA	NA
St_AA-exp1-plasma_post	NA	205	NA	NA	NA	4868	20391	NA	NA	8930	22	1913344	4083	239020	NA	NA	699	4808707	50	NA	8	797	1038	5527	5984	337	321954	1599	940268	3028314	10675998	NA	NA	NA	480691	NA	764915	NA	1399	NA	76026034	268520	103106	171458	768	NA	19264210	5206	75
St_AA_exp2-plasma_pre	NA	25	NA	NA	NA	2629	6683	NA	NA	7519	5	1320840	2064	469443	NA	NA	1157	3937548	4	NA	13	576	216	946	1667	51	187079	9845	1471619	1204337	5434415	NA	NA	NA	376610	NA	469877	NA	109	NA	51068398	71299	104914	55708	1571	NA	10518110	1717	45
St_SCFA1-exp1-plasma_post	NA	NA	373012	330529	250117	NA	NA	17909	145751	NA	NA	NA	NA	NA	NA	23573	NA	NA	NA	NA	NA	NA	NA	NA	NA	NA	NA	NA	NA	NA	NA	NA	214762	NA	NA	220260	NA	NA	NA	NA	NA	NA	NA	NA	NA	NA	NA	NA	NA
St_SCFA-exp3-plasma_pre	NA	NA	298476	321701	254064	NA	NA	21356	140175	NA	NA	NA	NA	NA	NA	28689	NA	NA	NA	NA	NA	NA	NA	NA	NA	NA	NA	NA	NA	NA	NA	NA	185064	NA	NA	210786	NA	NA	NA	NA	NA	NA	NA	NA	NA	NA	NA	NA	NA
St_PA-exp1-plasma_post	NA	NA	NA	NA	NA	NA	NA	NA	NA	NA	NA	NA	NA	NA	NA	NA	NA	NA	NA	NA	NA	NA	NA	NA	NA	NA	NA	NA	NA	NA	NA	NA	NA	1038	NA	NA	NA	NA	NA	NA	NA	NA	NA	NA	NA	NA	NA	NA	NA
St_PA-exp2-plasma_pre	NA	NA	NA	NA	NA	NA	NA	NA	NA	NA	NA	NA	NA	NA	NA	NA	NA	NA	NA	NA	NA	NA	NA	NA	NA	NA	NA	NA	NA	NA	NA	NA	NA	671	NA	NA	NA	NA	NA	NA	NA	NA	NA	NA	NA	NA	NA	NA	NA
St_BA2-exp2-plasma_post	89354	NA	NA	NA	NA	NA	NA	NA	NA	NA	NA	NA	NA	NA	589	NA	NA	NA	NA	45	NA	NA	NA	NA	NA	NA	NA	NA	NA	NA	NA	677587	NA	NA	NA	NA	NA	72205	NA	1517	NA	NA	NA	NA	NA	4121	NA	NA	NA
St_AA_exp2-plasma_post	NA	170	NA	NA	NA	904	19630	NA	NA	12392	162	2169294	5964	276941	NA	NA	903	5810834	152	NA	13	182	752	2489	10020	262	343798	3726	617645	3450780	9025180	NA	NA	NA	479054	NA	771578	NA	3085	NA	80029809	288612	136496	150890	886	NA	15284310	5848	21
St_BA1-exp2-plasma_post	2464	NA	NA	NA	NA	NA	NA	NA	NA	NA	NA	NA	NA	NA	178941	NA	NA	NA	NA	2494	NA	NA	NA	NA	NA	NA	NA	NA	NA	NA	NA	NA	NA	NA	NA	NA	NA	156910	NA	152645	NA	NA	NA	NA	NA	262170	NA	NA	NA
St_AA_exp3-plasma_pre	NA	52	NA	NA	NA	3215	8126	NA	NA	5639	72	1325602	2461	431323	NA	NA	735	2615484	12	NA	16	602	249	794	2902	116	193074	4504	591081	1814449	4049550	NA	NA	NA	216012	NA	443026	NA	3225	NA	35404262	117983	83333	37689	2354	NA	8119931	201	17
St_BA1-exp3-plasma_pre	2346	NA	NA	NA	NA	NA	NA	NA	NA	NA	NA	NA	NA	NA	160326	NA	NA	NA	NA	13493	NA	NA	NA	NA	NA	NA	NA	NA	NA	NA	NA	NA	NA	NA	NA	NA	NA	247427	NA	164244	NA	NA	NA	NA	NA	379491	NA	NA	NA
St_BA2-exp3-plasma_pre	87777	NA	NA	NA	NA	NA	NA	NA	NA	NA	NA	NA	NA	NA	42	NA	NA	NA	NA	NA	NA	NA	NA	NA	NA	NA	NA	NA	NA	NA	NA	759314	NA	NA	NA	NA	NA	362414	NA	2675	NA	NA	NA	NA	NA	15718	NA	NA	NA
St_SCFA_exp3-plasma_post	NA	NA	254050	242157	172259	NA	NA	19347	130547	NA	NA	NA	NA	NA	NA	21369	NA	NA	NA	NA	NA	NA	NA	NA	NA	NA	NA	NA	NA	NA	NA	NA	161591	NA	NA	189588	NA	NA	NA	NA	NA	NA	NA	NA	NA	NA	NA	NA	NA
St_PA-exp2-plasma_post	NA	NA	NA	NA	NA	NA	NA	NA	NA	NA	NA	NA	NA	NA	NA	NA	NA	NA	NA	NA	NA	NA	NA	NA	NA	NA	NA	NA	NA	NA	NA	NA	NA	719	NA	NA	NA	NA	NA	NA	NA	NA	NA	NA	NA	NA	NA	NA	NA
St_AA_exp3-plasma_post	NA	142	NA	NA	NA	5890	18596	NA	NA	7651	231	1996236	2895	195179	NA	NA	651	3771959	15	NA	19	175	321	1041	7355	284	326611	4913	368513	2805281	5484782	NA	NA	NA	304477	NA	653784	NA	5104	NA	51873849	273573	97494	103847	487	NA	10849471	4745	100
St_BA2-exp3-plasma_post	102014	NA	NA	NA	NA	NA	NA	NA	NA	NA	NA	NA	NA	NA	73	NA	NA	NA	NA	NA	NA	NA	NA	NA	NA	NA	NA	NA	NA	NA	NA	797910	NA	NA	NA	NA	NA	170456	NA	2538	NA	NA	NA	NA	NA	9671	NA	NA	NA
St_BA1-exp3-plasma_post	2542	NA	NA	NA	NA	NA	NA	NA	NA	NA	NA	NA	NA	NA	198027	NA	NA	NA	NA	3316	NA	NA	NA	NA	NA	NA	NA	NA	NA	NA	NA	NA	NA	NA	NA	NA	NA	196855	NA	185157	NA	NA	NA	NA	NA	330143	NA	NA	NA
[truncated: 107 more columns]

## Sheet: Height
Sid	12-dehydrocholic acid@5.34-ba	2-aminoadipic acid@15.25-gc	2-hydroxy-2-methylbutyric acid@3.43-sf	2-hydroxy-3-methylbutyric acid@4.53-sf	2-hydroxybutyric acid@2.47-sf	2-hydroxyglutaric acid@13.02-gc	2-oxoglutaric acid@13.03-gc	2-oxovaleric acid@14.60-sf	3-hydroxybutyric acid@1.66-sf	3-hydroxyisovaleric acid@7.83-gc	4-hydroxymandelic acid@15.24-gc	4-hydroxyproline@12.45-gc	5-aminovaleric acid@13.54-gc	5-oxoproline@12.36-gc	7,12-dihydroxy-3-oxocholanoic acid@6.49-ba	Acetic acid@1.78-sf	Adenine@16.20-gc	Alanine@6.92-gc	Allantoin@16.56-gc	Alpha-muricholic acid@5.94-ba	Alpha-tocopherol@29.53-gc	Anthranilic acid@13.44-gc	Arabinose@14.19-gc	Arabitol@14.83-gc	Arachidonic acid@23.77-gc	Asparagine@14.14-gc	Aspartic acid@12.38-gc	Behenic acid@26.42-gc	Benzoic acid@8.77-gc	Beta-alanine@11.17-gc	Beta-hydroxypyruvic acid@5.46-gc	Beta-muricholic acid@6.22-ba	Butanoic acid@5.21-sf	Cadaverine@4.64-pa	Capric acid@11.46-gc	Caproic acid@12.05-sf	Caprylic acid@8.96-gc	Chenodeoxycholic acid@10.31-ba	Cholesterol@29.53-gc	Cholic acid@9.11-ba	Citric acid;Isocitric acid@15.82-gc	Citrulline@15.79-gc	Creatine@12.81-gc	Cystine;Cysteine@23.03-gc	Cytosine@12.38-gc	Deoxycholic acid@10.53-ba	Dimethylglycine@5.46-gc	Erythritol@12.31-gc	Ferulic acid@19.23-gc
BlM-exp2-plasma_pre	NA	NA	12	6	12	NA	NA	2670	7	NA	NA	NA	NA	NA	NA	545	NA	NA	NA	NA	NA	NA	NA	NA	NA	NA	NA	NA	NA	NA	NA	NA	92	NA	NA	220	NA	NA	NA	NA	NA	NA	NA	NA	NA	NA	NA	NA	NA
BlM_exp1-plasma_pre	4	15	NA	NA	NA	877	71	NA	NA	2613	38	3079	444	52238	147	NA	420	185777	47	45	70	355	58	8	1327	251	1806	1021	704187	2417	2819969	7	NA	123	146170	NA	356578	95	326	16	29620	88	219	128	253	67	4988126	92	20
BlM-exp2-plasma_post	NA	NA	2	1	4	NA	NA	708	37	NA	NA	NA	NA	NA	NA	444	NA	NA	NA	NA	NA	NA	NA	NA	NA	NA	NA	NA	NA	NA	NA	NA	65	NA	NA	204	NA	NA	NA	NA	NA	NA	NA	NA	NA	NA	NA	NA	NA
BlM-exp1-plasma_pre	NA	NA	13	13	18	NA	NA	4072	23	NA	NA	NA	NA	NA	NA	663	NA	NA	NA	NA	NA	NA	NA	NA	NA	NA	NA	NA	NA	NA	NA	NA	114	NA	NA	237	NA	NA	NA	NA	NA	NA	NA	NA	NA	NA	NA	NA	NA
BlM_exp3-plasma_pre	4	49	NA	NA	NA	1645	161	NA	NA	2199	26	625	395	114793	7	NA	308	233967	16	35	44	342	98	22	852	1114	3997	2080	814545	1087	2762836	10	NA	306	196264	NA	512044	45	1406	20	43493	1528	308	214	312	27	5366024	319	52
BlM_exp1-plasma_post	5	68	NA	NA	NA	1979	314	NA	NA	3115	141	1534	564	32648	139	NA	329	409788	67	42	53	405	201	289	10858	1200	2451	984	849715	6082	4181307	11	NA	80	239546	NA	551783	34	1056	25	8379	740	569	497	205	45	7414936	272	60
BlM_exp2-plasma_pre	6	55	NA	NA	NA	963	60	NA	NA	2961	62	784	586	105585	7	NA	187	213466	40	23	15	415	280	87	989	615	1686	3756	1763417	4988	3378159	12	NA	84	258646	NA	501189	11	641	8	47660	411	410	230	360	17	5922972	278	49
BlM-exp1-plasma_post	NA	NA	3	2	5	NA	NA	1043	33	NA	NA	NA	NA	NA	NA	626	NA	NA	NA	NA	NA	NA	NA	NA	NA	NA	NA	NA	NA	NA	NA	NA	115	NA	NA	243	NA	NA	NA	NA	NA	NA	NA	NA	NA	NA	NA	NA	NA
BlM-exp3-plasma_pre	NA	NA	29	26	36	NA	NA	3571	35	NA	NA	NA	NA	NA	NA	671	NA	NA	NA	NA	NA	NA	NA	NA	NA	NA	NA	NA	NA	NA	NA	NA	100	NA	NA	281	NA	NA	NA	NA	NA	NA	NA	NA	NA	NA	NA	NA	NA
BlM_exp3-plasma_post	7	25	NA	NA	NA	2182	335	NA	NA	3345	24	1803	579	43951	3	NA	119	499525	34	22	35	425	155	117	7944	900	4394	2310	773499	1441	3216998	3	NA	335	235883	NA	671133	40	1938	19	7055	2206	360	410	126	55	6338553	577	126
BlM_exp2-plasma_post	2	69	NA	NA	NA	577	250	NA	NA	4459	167	2812	1114	41206	1	NA	362	1064781	143	14	60	303	501	619	11938	837	2530	2130	2070319	7486	4621492	11	NA	93	332957	NA	689108	9	1255	8	10867	1315	655	472	205	32	7976284	740	41
BlM-exp3-plasma_post	NA	NA	2	2	8	NA	NA	1261	69	NA	NA	NA	NA	NA	NA	587	NA	NA	NA	NA	NA	NA	NA	NA	NA	NA	NA	NA	NA	NA	NA	NA	79	NA	NA	193	NA	NA	NA	NA	NA	NA	NA	NA	NA	NA	NA	NA	NA
QC-exp2-plasma_5a	NA	NA	67	765	2705	NA	NA	6200	13829	NA	NA	NA	NA	NA	NA	1219	NA	NA	NA	NA	NA	NA	NA	NA	NA	NA	NA	NA	NA	NA	NA	NA	426	NA	NA	364	NA	NA	NA	NA	NA	NA	NA	NA	NA	NA	NA	NA	NA
QC_exp123-plasma_pre.baplasma1	116	NA	NA	NA	NA	NA	NA	NA	NA	NA	NA	NA	NA	NA	487	NA	NA	NA	NA	436	NA	NA	NA	NA	NA	NA	NA	NA	NA	NA	NA	5862	NA	NA	NA	NA	NA	599	NA	3334	NA	NA	NA	NA	NA	1979	NA	NA	NA
QC-exp2-plasma_5b	NA	NA	69	809	2773	NA	NA	3654	14171	NA	NA	NA	NA	NA	NA	1292	NA	NA	NA	NA	NA	NA	NA	NA	NA	NA	NA	NA	NA	NA	NA	NA	488	NA	NA	392	NA	NA	NA	NA	NA	NA	NA	NA	NA	NA	NA	NA	NA
QC_exp1-plasma_5b	148	15481	NA	NA	NA	202527	357362	NA	NA	6900	9664	1311398	46514	6356182	958	NA	5432	79965382	153529	481	1521	13838	59625	40344	647875	137677	131031	2804	360771	172102	906151	9609	NA	NA	248471	NA	577648	618	979503	4073	7396696	796308	2258829	46562	7036	3247	1676139	60245	3460
QC-exp2-plasma_5c	NA	NA	64	741	2357	NA	NA	4038	13959	NA	NA	NA	NA	NA	NA	1286	NA	NA	NA	NA	NA	NA	NA	NA	NA	NA	NA	NA	NA	NA	NA	NA	424	NA	NA	355	NA	NA	NA	NA	NA	NA	NA	NA	NA	NA	NA	NA	NA
QC_exp1-plasma_5c	174	15042	NA	NA	NA	218860	381431	NA	NA	6990	9277	1361690	48236	6786340	921	NA	4834	81408488	148807	444	1380	14140	61512	53064	664408	141283	138148	3185	393441	180984	934873	10062	NA	NA	263030	NA	610697	563	1001613	4105	7766060	871971	2297465	47721	6980	3105	1754709	63239	3154
QC_exp1-plasma_5a	131	13892	NA	NA	NA	181188	319886	NA	NA	6162	9676	1141421	34136	5903652	1033	NA	4427	86568560	120235	451	1153	11523	56157	32078	608241	104501	109579	3141	354216	119929	797687	9746	NA	159	229977	NA	534609	661	961984	4213	6947553	525005	2355431	39263	6074	3369	1440005	57558	3671
QC-exp2-plasma_5d	NA	NA	56	689	2193	NA	NA	3586	13846	NA	NA	NA	NA	NA	NA	1289	NA	NA	NA	NA	NA	NA	NA	NA	NA	NA	NA	NA	NA	NA	NA	NA	430	NA	NA	406	NA	NA	NA	NA	NA	NA	NA	NA	NA	NA	NA	NA	NA
QC_exp3-plasma_5d	NA	NA	NA	NA	NA	NA	NA	NA	NA	NA	NA	NA	NA	NA	NA	NA	NA	NA	NA	NA	NA	NA	NA	NA	NA	NA	NA	NA	NA	NA	NA	NA	NA	201	NA	NA	NA	NA	NA	NA	NA	NA	NA	NA	NA	NA	NA	NA	NA
QC_exp1-plasma_5d	147	16167	NA	NA	NA	222495	401583	NA	NA	8229	10155	1409845	49743	7067903	1005	NA	6014	85576552	145287	501	1129	14650	66121	59010	725660	144548	143472	3540	435873	185124	1023258	9545	NA	NA	270995	NA	651911	617	1040534	3980	7949363	965689	2185980	57693	7496	3108	1830970	67519	3146
QC-exp2-plasma_5e	NA	NA	66	690	2204	NA	NA	3215	14002	NA	NA	NA	NA	NA	NA	1328	NA	NA	NA	NA	NA	NA	NA	NA	NA	NA	NA	NA	NA	NA	NA	NA	435	NA	NA	400	NA	NA	NA	NA	NA	NA	NA	NA	NA	NA	NA	NA	NA
QC_exp1-plasma_6a	NA	15405	NA	NA	NA	218043	374435	NA	NA	7758	9004	1362678	43877	6805302	NA	NA	3704	98518859	133451	NA	1454	13969	61424	58343	766351	132730	129087	3336	400980	159638	1435774	NA	NA	NA	261774	NA	626404	NA	1165047	NA	7665592	809317	2245996	50264	7089	NA	2681740	66151	3211
QC-exp2-plasma_5f	NA	NA	59	707	2323	NA	NA	2762	13780	NA	NA	NA	NA	NA	NA	1357	NA	NA	NA	NA	NA	NA	NA	NA	NA	NA	NA	NA	NA	NA	NA	NA	432	NA	NA	446	NA	NA	NA	NA	NA	NA	NA	NA	NA	NA	NA	NA	NA
QC_exp3-plasma_5f	NA	NA	NA	NA	NA	NA	NA	NA	NA	NA	NA	NA	NA	NA	NA	NA	NA	NA	NA	NA	NA	NA	NA	NA	NA	NA	NA	NA	NA	NA	NA	NA	NA	170	NA	NA	NA	NA	NA	NA	NA	NA	NA	NA	NA	NA	NA	NA	NA
QC_exp1-plasma_5f	120	NA	NA	NA	NA	NA	NA	NA	NA	NA	NA	NA	NA	NA	893	NA	NA	NA	NA	500	NA	NA	NA	NA	NA	NA	NA	NA	NA	NA	NA	9069	NA	NA	NA	NA	NA	585	NA	3646	NA	NA	NA	NA	NA	3035	NA	NA	NA
QC_exp1-plasma_6b	NA	14055	NA	NA	NA	187697	334350	NA	NA	6441	8935	1209701	41193	6458231	NA	NA	3430	90748295	105267	NA	1274	11805	54782	58994	673046	107132	110323	2465	419925	143342	1294493	NA	NA	NA	242026	NA	557428	NA	1063962	NA	7087210	687280	1894032	47198	5675	NA	2445463	57696	2586
QC-exp2-plasma_4f	NA	NA	66	634	2210	NA	NA	2116	14098	NA	NA	NA	NA	NA	NA	1321	NA	NA	NA	NA	NA	NA	NA	NA	NA	NA	NA	NA	NA	NA	NA	NA	451	NA	NA	512	NA	NA	NA	NA	NA	NA	NA	NA	NA	NA	NA	NA	NA
QC_exp1-plasma_5e	119	15973	NA	NA	NA	235428	410641	NA	NA	8162	10552	1437641	51324	7638114	885	NA	5487	105526927	124465	534	1681	14773	64335	73211	814305	128415	148690	3676	509004	188328	999008	9725	NA	NA	313683	NA	662415	604	1189164	3798	8358807	958370	1792366	63576	8422	3007	1923806	71733	3144
QC-exp2-plasma_5g	NA	NA	73	671	2259	NA	NA	2450	13744	NA	NA	NA	NA	NA	NA	1264	NA	NA	NA	NA	NA	NA	NA	NA	NA	NA	NA	NA	NA	NA	NA	NA	407	NA	NA	440	NA	NA	NA	NA	NA	NA	NA	NA	NA	NA	NA	NA	NA
QC_exp3-plasma_5g	NA	NA	NA	NA	NA	NA	NA	NA	NA	NA	NA	NA	NA	NA	NA	NA	NA	NA	NA	NA	NA	NA	NA	NA	NA	NA	NA	NA	NA	NA	NA	NA	NA	115	NA	NA	NA	NA	NA	NA	NA	NA	NA	NA	NA	NA	NA	NA	NA
QC_exp1-plasma_5g	142	NA	NA	NA	NA	NA	NA	NA	NA	NA	NA	NA	NA	NA	888	NA	NA	NA	NA	395	NA	NA	NA	NA	NA	NA	NA	NA	NA	NA	NA	9678	NA	NA	NA	NA	NA	676	NA	3774	NA	NA	NA	NA	NA	3037	NA	NA	NA
QC-exp1-plasma_7a	NA	NA	83	1142	3073	NA	NA	6094	12258	NA	NA	NA	NA	NA	NA	1431	NA	NA	NA	NA	NA	NA	NA	NA	NA	NA	NA	NA	NA	NA	NA	NA	574	NA	NA	667	NA	NA	NA	NA	NA	NA	NA	NA	NA	NA	NA	NA	NA
QC_exp1-plasma_6c	NA	14189	NA	NA	NA	202233	353239	NA	NA	6534	8344	1259626	36556	6605385	NA	NA	3618	93430958	109543	NA	1784	13044	57521	61478	683132	111620	125350	2671	435089	148556	1365721	NA	NA	NA	264542	NA	594501	NA	1111567	NA	7558778	735459	1896413	51416	7036	NA	2540462	65204	2882
QC_exp3-plasma_5a	NA	11795	NA	NA	NA	179045	343295	NA	NA	8890	13115	1106084	34730	4741870	NA	NA	3547	48603201	131690	NA	1059	8637	60902	37843	667337	111526	86845	5773	506633	139971	1799937	NA	NA	300	264676	NA	660421	NA	701472	NA	6539015	555105	1203591	45100	7474	NA	3469151	62855	2916
QC_exp1-plasma_5i	116	NA	NA	NA	NA	NA	NA	NA	NA	NA	NA	NA	NA	NA	864	NA	NA	NA	NA	472	NA	NA	NA	NA	NA	NA	NA	NA	NA	NA	NA	9346	NA	NA	NA	NA	NA	616	NA	3735	NA	NA	NA	NA	NA	2831	NA	NA	NA
QC_exp123-plasma_post.baplasma1	97	NA	NA	NA	NA	NA	NA	NA	NA	NA	NA	NA	NA	NA	456	NA	NA	NA	NA	390	NA	NA	NA	NA	NA	NA	NA	NA	NA	NA	NA	5758	NA	NA	NA	NA	NA	506	NA	2855	NA	NA	NA	NA	NA	1961	NA	NA	NA
QC-exp1-plasma_7b	NA	NA	86	1163	3094	NA	NA	5764	12291	NA	NA	NA	NA	NA	NA	1490	NA	NA	NA	NA	NA	NA	NA	NA	NA	NA	NA	NA	NA	NA	NA	NA	608	NA	NA	677	NA	NA	NA	NA	NA	NA	NA	NA	NA	NA	NA	NA	NA
QC_batch-exp1-plasma_PA_5b	NA	NA	NA	NA	NA	NA	NA	NA	NA	NA	NA	NA	NA	NA	NA	NA	NA	NA	NA	NA	NA	NA	NA	NA	NA	NA	NA	NA	NA	NA	NA	NA	NA	130	NA	NA	NA	NA	NA	NA	NA	NA	NA	NA	NA	NA	NA	NA	NA
QC_exp1-plasma_6d	NA	15910	NA	NA	NA	218072	385286	NA	NA	7288	9685	1326675	43448	7243303	NA	NA	5002	102009874	108859	NA	1155	14055	60187	74455	838774	121541	138300	3383	475982	171336	1463844	NA	NA	NA	296192	NA	656026	NA	1195612	NA	8033241	845618	1871143	55552	7188	NA	2814024	65209	2478
QC_exp123-plasma_pre.baplasma2	94	NA	NA	NA	NA	NA	NA	NA	NA	NA	NA	NA	NA	NA	438	NA	NA	NA	NA	449	NA	NA	NA	NA	NA	NA	NA	NA	NA	NA	NA	5238	NA	NA	NA	NA	NA	403	NA	2680	NA	NA	NA	NA	NA	1685	NA	NA	NA
QC_exp2-plasma_5a	53	13488	NA	NA	NA	214622	435796	NA	NA	8495	9746	1333350	45471	7203230	10	NA	4100	103803414	132827	328	1300	8999	87865	42841	855165	125878	129892	6239	590239	150065	2086345	3039	NA	NA	362992	NA	706420	273	1087033	2028	7801859	574823	2617581	45067	6734	2148	3821245	72756	2669
QC_exp3-plasma_5b	NA	11029	NA	NA	NA	197545	389521	NA	NA	9127	13729	1178200	34261	5041932	NA	NA	4235	51839447	120482	NA	1177	11466	68320	44476	578483	117113	93206	4209	519321	143659	1882912	NA	NA	264	261343	NA	719230	NA	760892	NA	6534973	501062	1140969	46489	7825	NA	3641103	64184	2954
QC-exp1-plasma_7c	NA	NA	76	1186	3033	NA	NA	5619	12364	NA	NA	NA	NA	NA	NA	1434	NA	NA	NA	NA	NA	NA	NA	NA	NA	NA	NA	NA	NA	NA	NA	NA	617	NA	NA	711	NA	NA	NA	NA	NA	NA	NA	NA	NA	NA	NA	NA	NA
QC_batch-exp1-plasma_PA_5c	NA	NA	NA	NA	NA	NA	NA	NA	NA	NA	NA	NA	NA	NA	NA	NA	NA	NA	NA	NA	NA	NA	NA	NA	NA	NA	NA	NA	NA	NA	NA	NA	NA	145	NA	NA	NA	NA	NA	NA	NA	NA	NA	NA	NA	NA	NA	NA	NA
QC_exp2-plasma_5b	51	15268	NA	NA	NA	230680	467141	NA	NA	8566	9901	1490240	56814	7620935	261	NA	5005	105644019	158791	335	1386	9929	98210	56651	700765	156468	141596	4881	596976	181201	2246119	3039	NA	NA	375410	NA	713833	287	1080171	2154	8382826	750851	2703277	47719	9441	2137	4037918	76738	2576
QC_exp3-plasma_5c	NA	12032	NA	NA	NA	206338	419204	NA	NA	9920	13817	1255754	37417	5428537	NA	NA	3824	52280181	128201	NA	1414	10185	70934	52130	589179	125325	95612	4761	547675	158035	1922854	NA	NA	197	280601	NA	758841	NA	809713	NA	7353788	534717	1119495	53339	7825	NA	3815288	72195	3642
QC-exp1-plsma_7d	NA	NA	95	1171	3187	NA	NA	4749	12638	NA	NA	NA	NA	NA	NA	1432	NA	NA	NA	NA	NA	NA	NA	NA	NA	NA	NA	NA	NA	NA	NA	NA	643	NA	NA	771	NA	NA	NA	NA	NA	NA	NA	NA	NA	NA	NA	NA	NA
QC_batch-exp1-plasma_PA_5d	NA	NA	NA	NA	NA	NA	NA	NA	NA	NA	NA	NA	NA	NA	NA	NA	NA	NA	NA	NA	NA	NA	NA	NA	NA	NA	NA	NA	NA	NA	NA	NA	NA	142	NA	NA	NA	NA	NA	NA	NA	NA	NA	NA	NA	NA	NA	NA	NA
QC_exp2-plasma_5c	38	14272	NA	NA	NA	230340	473148	NA	NA	8773	10097	1448545	57295	7712126	191	NA	5417	108653037	151100	399	1352	10134	95903	69990	775086	142758	137619	3785	626615	182989	2276918	3264	NA	NA	377472	NA	784749	237	1128830	2136	8325576	766024	2364775	51874	8640	2237	3957542	76734	2284
QC-exp1-plasma_7e	NA	NA	105	1195	3295	NA	NA	4731	12676	NA	NA	NA	NA	NA	NA	1465	NA	NA	NA	NA	NA	NA	NA	NA	NA	NA	NA	NA	NA	NA	NA	NA	670	NA	NA	804	NA	NA	NA	NA	NA	NA	NA	NA	NA	NA	NA	NA	NA
QC_batch-exp1-plasma_PA_5e	NA	NA	NA	NA	NA	NA	NA	NA	NA	NA	NA	NA	NA	NA	NA	NA	NA	NA	NA	NA	NA	NA	NA	NA	NA	NA	NA	NA	NA	NA	NA	NA	NA	111	NA	NA	NA	NA	NA	NA	NA	NA	NA	NA	NA	NA	NA	NA	NA
QC_exp2-plasma_6a	NA	14467	NA	NA	NA	225919	467570	NA	NA	6886	7809	1391062	47039	7417070	NA	NA	3752	104670271	133694	NA	1574	13990	91936	70869	728735	133428	123086	3942	611621	171170	2136252	NA	NA	NA	351440	NA	754092	NA	1144493	NA	8326562	660773	2157477	50488	7881	NA	3759994	75047	1911
QC_exp2-plasma_5e	46	NA	NA	NA	NA	NA	NA	NA	NA	NA	NA	NA	NA	NA	231	NA	NA	NA	NA	452	NA	NA	NA	NA	NA	NA	NA	NA	NA	NA	NA	3212	NA	NA	NA	NA	NA	266	NA	2203	NA	NA	NA	NA	NA	2123	NA	NA	NA
QC_exp2-plasma_6b	NA	14040	NA	NA	NA	238451	478096	NA	NA	8084	8707	1424044	51066	7712269	NA	NA	3549	106630980	138320	NA	1545	12971	99028	71683	684843	143468	128540	3832	600202	175370	2084152	NA	NA	NA	378184	NA	801724	NA	1142596	NA	8831541	728656	2088626	52795	8015	NA	3843987	79734	1932
QC-exp1-plasma_7f	NA	NA	82	1201	3122	NA	NA	3382	12750	NA	NA	NA	NA	NA	NA	1512	NA	NA	NA	NA	NA	NA	NA	NA	NA	NA	NA	NA	NA	NA	NA	NA	599	NA	NA	788	NA	NA	NA	NA	NA	NA	NA	NA	NA	NA	NA	NA	NA
QC_batch-exp1-plasma_PA_5f	NA	NA	NA	NA	NA	NA	NA	NA	NA	NA	NA	NA	NA	NA	NA	NA	NA	NA	NA	NA	NA	NA	NA	NA	NA	NA	NA	NA	NA	NA	NA	NA	NA	124	NA	NA	NA	NA	NA	NA	NA	NA	NA	NA	NA	NA	NA	NA	NA
QC_exp3-plasma_5e	NA	12708	NA	NA	NA	224440	441953	NA	NA	10775	13732	1323910	38644	5905923	NA	NA	4227	53095648	106262	NA	1593	11460	77847	69249	634078	115718	103692	5244	585697	163218	2213608	NA	NA	179	301465	NA	803821	NA	838680	NA	7423380	536402	970340	56114	9220	NA	4216146	79509	3413
QC_exp2-plasma_5d	65	14581	NA	NA	NA	250283	501926	NA	NA	8903	10769	1538507	55760	8286560	253	NA	4674	109255693	134105	397	1669	11878	101568	94912	826150	134936	148846	4640	701136	190348	2459356	3154	NA	NA	425384	NA	853129	295	1252635	2136	9095410	861420	2022383	61922	9400	2117	4339096	85579	1833
QC-exp1-plasma_7g	NA	NA	89	1177	3211	NA	NA	2678	12856	NA	NA	NA	NA	NA	NA	1409	NA	NA	NA	NA	NA	NA	NA	NA	NA	NA	NA	NA	NA	NA	NA	NA	652	NA	NA	818	NA	NA	NA	NA	NA	NA	NA	NA	NA	NA	NA	NA	NA
QC_exp2-plasma_5f	36	NA	NA	NA	NA	NA	NA	NA	NA	NA	NA	NA	NA	NA	260	NA	NA	NA	NA	414	NA	NA	NA	NA	NA	NA	NA	NA	NA	NA	NA	3113	NA	NA	NA	NA	NA	260	NA	2277	NA	NA	NA	NA	NA	2238	NA	NA	NA
QC_exp2-plasma_6c	NA	13977	NA	NA	NA	234022	476519	NA	NA	8665	10494	1495770	56194	7951183	NA	NA	4285	109657990	129449	NA	1482	13928	100468	82146	775942	137600	137417	4047	644152	184750	2235753	NA	NA	NA	384078	NA	839426	NA	1164463	NA	8811427	787635	1995117	55838	8867	NA	3997933	80229	2009
QC_batch-exp1-plasma_PA_5g	NA	NA	NA	NA	NA	NA	NA	NA	NA	NA	NA	NA	NA	NA	NA	NA	NA	NA	NA	NA	NA	NA	NA	NA	NA	NA	NA	NA	NA	NA	NA	NA	NA	105	NA	NA	NA	NA	NA	NA	NA	NA	NA	NA	NA	NA	NA	NA	NA
QC-exp1-plasma_7h	NA	NA	111	1229	3359	NA	NA	2387	12596	NA	NA	NA	NA	NA	NA	1439	NA	NA	NA	NA	NA	NA	NA	NA	NA	NA	NA	NA	NA	NA	NA	NA	670	NA	NA	803	NA	NA	NA	NA	NA	NA	NA	NA	NA	NA	NA	NA	NA
QC_exp1-plasma_5h	NA	NA	NA	NA	NA	NA	NA	NA	NA	NA	NA	NA	NA	NA	NA	NA	NA	NA	NA	NA	NA	NA	NA	NA	NA	NA	NA	NA	NA	NA	NA	NA	NA	89	NA	NA	NA	NA	NA	NA	NA	NA	NA	NA	NA	NA	NA	NA	NA
QC_exp2-plasma_5g	50	NA	NA	NA	NA	NA	NA	NA	NA	NA	NA	NA	NA	NA	278	NA	NA	NA	NA	366	NA	NA	NA	NA	NA	NA	NA	NA	NA	NA	NA	3113	NA	NA	NA	NA	NA	167	NA	2151	NA	NA	NA	NA	NA	2112	NA	NA	NA
QC_exp2-plasma_6d	NA	15776	NA	NA	NA	240020	479364	NA	NA	9360	9567	1471942	50915	8151825	NA	NA	4382	107401488	126749	NA	1360	13668	99977	90101	790724	134020	140416	4022	647755	183106	2211306	NA	NA	NA	389679	NA	854655	NA	1247482	NA	9091720	764841	1840909	55258	9093	NA	4047830	85826	1918
QC_exp123-plasma_post.baplasma2	70	NA	NA	NA	NA	NA	NA	NA	NA	NA	NA	NA	NA	NA	482	NA	NA	NA	NA	457	NA	NA	NA	NA	NA	NA	NA	NA	NA	NA	NA	5166	NA	NA	NA	NA	NA	395	NA	2913	NA	NA	NA	NA	NA	1707	NA	NA	NA
QC-exp3-plasma_5a	NA	NA	131	2219	3946	NA	NA	8114	22002	NA	NA	NA	NA	NA	NA	1991	NA	NA	NA	NA	NA	NA	NA	NA	NA	NA	NA	NA	NA	NA	NA	NA	636	NA	NA	516	NA	NA	NA	NA	NA	NA	NA	NA	NA	NA	NA	NA	NA
QC_batch-exp2-plasma_5a	NA	NA	NA	NA	NA	NA	NA	NA	NA	NA	NA	NA	NA	NA	NA	NA	NA	NA	NA	NA	NA	NA	NA	NA	NA	NA	NA	NA	NA	NA	NA	NA	NA	84	NA	NA	NA	NA	NA	NA	NA	NA	NA	NA	NA	NA	NA	NA	NA
QC_batch-exp123-plasma_pre	64	NA	NA	NA	NA	NA	NA	NA	NA	NA	NA	NA	NA	NA	435	NA	NA	NA	NA	536	NA	NA	NA	NA	NA	NA	NA	NA	NA	NA	NA	5193	NA	NA	NA	NA	NA	300	NA	2645	NA	NA	NA	NA	NA	1301	NA	NA	NA
QC_batch-exp3-plasma_5a	135	NA	NA	NA	NA	NA	NA	NA	NA	NA	NA	NA	NA	NA	337	NA	NA	NA	NA	666	NA	NA	NA	NA	NA	NA	NA	NA	NA	NA	NA	4829	NA	NA	NA	NA	NA	821	NA	4283	NA	NA	NA	NA	NA	1717	NA	NA	NA
QC-exp3-plasma_5b	NA	NA	129	2174	3763	NA	NA	7322	21688	NA	NA	NA	NA	NA	NA	1931	NA	NA	NA	NA	NA	NA	NA	NA	NA	NA	NA	NA	NA	NA	NA	NA	593	NA	NA	525	NA	NA	NA	NA	NA	NA	NA	NA	NA	NA	NA	NA	NA
QC_batch-exp2-plasma_5b	NA	NA	NA	NA	NA	NA	NA	NA	NA	NA	NA	NA	NA	NA	NA	NA	NA	NA	NA	NA	NA	NA	NA	NA	NA	NA	NA	NA	NA	NA	NA	NA	NA	81	NA	NA	NA	NA	NA	NA	NA	NA	NA	NA	NA	NA	NA	NA	NA
QC_batch-exp3-plasma_5b	118	NA	NA	NA	NA	NA	NA	NA	NA	NA	NA	NA	NA	NA	423	NA	NA	NA	NA	668	NA	NA	NA	NA	NA	NA	NA	NA	NA	NA	NA	5015	NA	NA	NA	NA	NA	835	NA	4362	NA	NA	NA	NA	NA	1630	NA	NA	NA
QC-exp3-plasma_5c	NA	NA	105	1856	3165	NA	NA	6386	20870	NA	NA	NA	NA	NA	NA	1996	NA	NA	NA	NA	NA	NA	NA	NA	NA	NA	NA	NA	NA	NA	NA	NA	551	NA	NA	507	NA	NA	NA	NA	NA	NA	NA	NA	NA	NA	NA	NA	NA
QC_batch-exp2-plasma_5c	NA	NA	NA	NA	NA	NA	NA	NA	NA	NA	NA	NA	NA	NA	NA	NA	NA	NA	NA	NA	NA	NA	NA	NA	NA	NA	NA	NA	NA	NA	NA	NA	NA	120	NA	NA	NA	NA	NA	NA	NA	NA	NA	NA	NA	NA	NA	NA	NA
QC_batch-exp3-plasma_5c	114	NA	NA	NA	NA	NA	NA	NA	NA	NA	NA	NA	NA	NA	371	NA	NA	NA	NA	607	NA	NA	NA	NA	NA	NA	NA	NA	NA	NA	NA	5004	NA	NA	NA	NA	NA	743	NA	4364	NA	NA	NA	NA	NA	1650	NA	NA	NA
QC_batch-exp2-plasma_5d	NA	NA	NA	NA	NA	NA	NA	NA	NA	NA	NA	NA	NA	NA	NA	NA	NA	NA	NA	NA	NA	NA	NA	NA	NA	NA	NA	NA	NA	NA	NA	NA	NA	130	NA	NA	NA	NA	NA	NA	NA	NA	NA	NA	NA	NA	NA	NA	NA
QC-exp3-plasma_5d	NA	NA	110	1936	2990	NA	NA	5648	20679	NA	NA	NA	NA	NA	NA	1936	NA	NA	NA	NA	NA	NA	NA	NA	NA	NA	NA	NA	NA	NA	NA	NA	566	NA	NA	557	NA	NA	NA	NA	NA	NA	NA	NA	NA	NA	NA	NA	NA
QC_exp3-plasma_6a	NA	13181	NA	NA	NA	204868	413702	NA	NA	8277	14618	1419198	34530	5013825	NA	NA	3661	61153552	140787	NA	1577	11772	70538	57294	608859	146487	107657	4951	547949	141994	575975	NA	NA	NA	243715	NA	710488	NA	788978	NA	7175523	739187	1360762	64352	7175	NA	1128863	69973	2890
QC_batch-exp3-plasma_5d	146	NA	NA	NA	NA	NA	NA	NA	NA	NA	NA	NA	NA	NA	389	NA	NA	NA	NA	670	NA	NA	NA	NA	NA	NA	NA	NA	NA	NA	NA	5230	NA	NA	NA	NA	NA	847	NA	4322	NA	NA	NA	NA	NA	1888	NA	NA	NA
QC_batch-exp2-plasma_5e	NA	NA	NA	NA	NA	NA	NA	NA	NA	NA	NA	NA	NA	NA	NA	NA	NA	NA	NA	NA	NA	NA	NA	NA	NA	NA	NA	NA	NA	NA	NA	NA	NA	117	NA	NA	NA	NA	NA	NA	NA	NA	NA	NA	NA	NA	NA	NA	NA
QC-exp3-plasma_5e	NA	NA	93	1852	3058	NA	NA	4993	21023	NA	NA	NA	NA	NA	NA	1891	NA	NA	NA	NA	NA	NA	NA	NA	NA	NA	NA	NA	NA	NA	NA	NA	568	NA	NA	578	NA	NA	NA	NA	NA	NA	NA	NA	NA	NA	NA	NA	NA
QC_exp3-plasma_6b	NA	13320	NA	NA	NA	204802	415467	NA	NA	9437	14506	1365637	31847	5392349	NA	NA	3937	63438290	118925	NA	1320	12350	71392	63233	577614	130445	101374	4544	555645	139938	617059	NA	NA	NA	259785	NA	720680	NA	799845	NA	7192688	644056	1263581	57413	7584	NA	1143418	69245	3160
QC_batch-exp3-plasma_5e	157	NA	NA	NA	NA	NA	NA	NA	NA	NA	NA	NA	NA	NA	322	NA	NA	NA	NA	579	NA	NA	NA	NA	NA	NA	NA	NA	NA	NA	NA	5112	NA	NA	NA	NA	NA	797	NA	4234	NA	NA	NA	NA	NA	1850	NA	NA	NA
QC_batch-exp2-plasma_5f	NA	NA	NA	NA	NA	NA	NA	NA	NA	NA	NA	NA	NA	NA	NA	NA	NA	NA	NA	NA	NA	NA	NA	NA	NA	NA	NA	NA	NA	NA	NA	NA	NA	115	NA	NA	NA	NA	NA	NA	NA	NA	NA	NA	NA	NA	NA	NA	NA
QC-exp3-plasma_5f	NA	NA	103	1855	3009	NA	NA	4002	21143	NA	NA	NA	NA	NA	NA	1817	NA	NA	NA	NA	NA	NA	NA	NA	NA	NA	NA	NA	NA	NA	NA	NA	525	NA	NA	587	NA	NA	NA	NA	NA	NA	NA	NA	NA	NA	NA	NA	NA
QC_exp3-plasma_6c	NA	12863	NA	NA	NA	218638	439745	NA	NA	8298	13489	1415462	29827	5451766	NA	NA	3751	61170112	117859	NA	1374	12372	72764	64090	585395	140232	105959	4822	569175	141733	651110	NA	NA	NA	264325	NA	717982	NA	807089	NA	7319787	676134	1265905	55975	7945	NA	1182370	75308	3141
QC_batch-exp3-plasma_5f	136	NA	NA	NA	NA	NA	NA	NA	NA	NA	NA	NA	NA	NA	339	NA	NA	NA	NA	616	NA	NA	NA	NA	NA	NA	NA	NA	NA	NA	NA	5172	NA	NA	NA	NA	NA	734	NA	4384	NA	NA	NA	NA	NA	1832	NA	NA	NA
QC-exp3-plasma_5g	NA	NA	108	1815	2966	NA	NA	3069	20641	NA	NA	NA	NA	NA	NA	1835	NA	NA	NA	NA	NA	NA	NA	NA	NA	NA	NA	NA	NA	NA	NA	NA	523	NA	NA	568	NA	NA	NA	NA	NA	NA	NA	NA	NA	NA	NA	NA	NA
QC_batch-exp2-plasma_5g	NA	NA	NA	NA	NA	NA	NA	NA	NA	NA	NA	NA	NA	NA	NA	NA	NA	NA	NA	NA	NA	NA	NA	NA	NA	NA	NA	NA	NA	NA	NA	NA	NA	106	NA	NA	NA	NA	NA	NA	NA	NA	NA	NA	NA	NA	NA	NA	NA
QC_exp3-plasma_6d	NA	13487	NA	NA	NA	221565	440047	NA	NA	10387	15402	1471121	36561	5651086	NA	NA	4700	62874990	126020	NA	1702	13241	78801	66441	651219	149880	116737	5229	574415	155608	654925	NA	NA	NA	279204	NA	754459	NA	832257	NA	7911519	867975	1283342	65986	8646	NA	1252430	79601	3796
QC_batch-exp3-plasma_5g	137	NA	NA	NA	NA	NA	NA	NA	NA	NA	NA	NA	NA	NA	412	NA	NA	NA	NA	538	NA	NA	NA	NA	NA	NA	NA	NA	NA	NA	NA	4998	NA	NA	NA	NA	NA	776	NA	4079	NA	NA	NA	NA	NA	1725	NA	NA	NA
QC_batch-exp123-plasma_post	97	NA	NA	NA	NA	NA	NA	NA	NA	NA	NA	NA	NA	NA	525	NA	NA	NA	NA	491	NA	NA	NA	NA	NA	NA	NA	NA	NA	NA	NA	5558	NA	NA	NA	NA	NA	293	NA	2652	NA	NA	NA	NA	NA	1451	NA	NA	NA
HIRAE-j14-exp1-plasma_239	156	20525	68	646	2620	374107	240260	5034	4955	9429	11222	1704794	82803	8316063	3131	944	4486	95239600	282096	1710	1130	18969	53763	43622	695551	218260	210583	4055	313110	486462	1466712	34035	229	117	201083	515	510634	2385	900961	8637	7175145	1037478	3695135	61592	5698	6533	2720056	57783	6990
BARNECIELA-j14-exp1-plasma_252	1814	18546	48	677	4312	287380	804158	4328	8122	7331	9262	1322197	54391	8938330	1423	1516	4853	96871527	169693	4013	918	4934	38914	41856	581902	383492	262556	4312	362001	314271	1908233	50942	1584	147	214207	407	522331	7632	804048	92088	9106410	770030	3095717	21997	9684	138	3371007	70146	4179
ATB-j7-exp1-plasma_207	1	11312	61	583	2413	130803	373559	6104	16507	7963	8742	1082712	28971	4190131	100	935	3154	66506975	74329	69	1024	442	54142	44034	1122747	110972	98040	3163	310097	76754	1021897	56	382	75	202856	767	520454	63	937003	18	7434363	507992	1476472	29726	5093	43	1867571	47190	2385
HIRAE-j14-exp1-plasma_235	71	16881	74	604	3276	152786	291948	6146	9258	9073	10511	1092034	47874	6988448	4652	927	4126	74438957	130458	745	1042	13110	82822	37868	944283	95887	142009	3658	344776	169478	1472929	6087	400	134	188335	545	493495	853	885440	2759	6788343	616445	2136677	42704	6326	2930	2653725	44823	3077
BARNECIELA-j3-exp1-plasma_195	4	15437	47	623	2437	234763	378137	4335	3361	6320	6338	1981558	40531	7238675	8	787	3214	101227030	116051	44	1504	15616	46490	46308	393673	174403	132386	3375	457355	147181	1197828	188	664	166	262082	781	557886	69	1132610	118	5682249	961712	2556683	35532	4828	51	2110830	74413	4769
ATB-j3-exp1-plasma_179	6	12074	53	655	3200	192977	342789	5007	15067	5823	6796	1447675	29899	5324657	7	680	3962	63995215	113254	200	1335	415	51675	41392	697475	120054	162109	2816	280925	133445	885689	35	297	148	235755	560	519257	21	854319	23	7945093	646174	2070376	34686	5253	24	1614842	43927	2468
BARNECIELA-j14-exp1-plasma_247	87	16055	39	517	2717	167127	313907	4711	7101	8535	9110	1503628	36893	6182206	254	968	3634	64270492	108523	378	1266	11691	103510	29480	828803	99248	115108	3614	284448	147557	1346939	5584	421	120	206350	687	513657	474	885807	2067	6376439	644745	1849830	48405	7733	36	2524431	58149	4687
Nacl-j7-exp1-plasma_199	553	16634	58	1266	3128	184436	333637	5254	13272	6025	12104	1091129	49910	7174865	485	1654	5159	71764958	135513	2058	1361	47728	43814	38886	658862	101567	146118	4573	402516	175175	1171595	11130	516	148	217282	696	589459	762	1066455	8879	7814637	498309	1816673	62795	12663	7465	2090492	63838	3044
HIRAE-j3-exp1-plasma_185	12	16184	62	713	3671	277725	695017	4948	12662	6167	10044	1350514	38433	7281473	11	1168	5392	88863173	88603	55	1476	1205	65233	60567	1037270	133014	158448	4316	411365	143675	1311914	114	782	184	354642	709	692765	29	1200207	115	10609113	681813	2037472	29980	5796	25	2492837	84979	2914
ATB-j14-exp1-plasma_230	5	13361	58	616	4080	104156	256153	4293	22505	7449	6476	1186230	44218	5814457	9	837	3846	62813852	147419	8	1526	515	69776	48035	898575	134043	105908	2852	300691	109356	1229453	34	441	185	225615	751	557320	41	1057617	25	6720885	925277	2026673	44022	4435	28	2325050	50545	2560
FRAGILIS-j3-exp1-plasma_189	11	11820	62	1133	2417	284908	466006	4961	6990	6168	8333	1522444	30718	4919365	23	984	3007	70776377	109128	74	1346	749	61286	42108	555090	106667	96266	3405	384913	117594	1436408	1233	738	119	318007	707	668494	73	942184	64	7901995	565864	2038920	31273	6012	78	2595373	55219	3121
ATB-j14-exp1-plasma_232	4	12855	73	822	6184	163868	453697	5359	35052	8567	8707	1112229	37263	5425285	88	1103	3445	66860369	122709	9	1312	529	55473	46687	1000426	144295	99975	3317	297312	100073	1437065	101	620	187	236286	839	537584	44	930306	22	8465752	754649	1933745	37636	5295	48	2675332	48145	3019
ATB-j3-exp1-plasma_175	5	13414	76	625	3429	211745	349391	5656	16053	6225	8071	1039127	26812	4811020	5	861	2962	67040147	92771	49	1459	633	56821	31593	743225	119915	78920	3504	302047	105407	987887	51	569	150	306234	786	540271	22	938085	11	6199147	662258	1944762	34783	4009	53	1810705	41288	2558
HIRAE-j7-exp1-plasma_213	123	12651	69	1078	2199	226550	482346	4450	12341	6955	7314	1156449	35093	5491271	334	1027	4317	63758705	117643	203	1047	5934	48982	36385	536932	110269	120433	3619	301604	120719	1049542	6606	475	138	234265	561	552075	434	1036373	2206	9017488	581088	2007858	35354	6201	3397	1921744	52929	2427
Nacl-j7-exp1-plasma_203	29	14361	49	1331	1818	143012	255795	3766	7701	6201	10869	1079195	38085	7964843	181	1374	4551	71640191	103660	368	1245	21017	43033	46603	586118	102618	166086	3952	445578	165701	2220921	1243	750	99	240597	698	610422	207	1047871	1049	6043791	577952	1344000	48016	7488	1750	4067523	65010	3783
Nacl-j3-exp1-plasma_169	845	15648	74	1009	4069	253165	449687	5369	17079	6707	10279	1106400	73220	6695766	5751	1440	4257	60861681	257507	2763	1446	43850	39229	41853	647321	128192	164084	4271	361011	389040	1044051	24708	560	152	215526	797	549277	1455	1039793	13221	8870417	752312	2347304	96046	13834	13888	1912141	60277	2417
FRAGILIS-j7-exp1-plasma_221	7	16124	83	638	2677	210084	434307	4458	20154	9442	6773	750738	42079	6622727	69	984	3490	60750460	147732	256	1188	14470	59833	37363	599524	104209	83064	2595	274884	104319	1611767	2929	373	155	223192	532	499676	83	888759	2171	8639097	426266	1503007	42024	5794	7806	2823139	51758	2709
ATB-j7-exp1-plasma_209	NA	14520	89	678	1441	126719	365852	4613	9677	9356	6011	1392085	34855	6141886	NA	621	2983	93573909	129335	NA	1488	418	53306	36735	638483	226045	87463	2446	274966	112596	989187	NA	247	56	198750	513	484625	NA	936915	NA	6273210	830181	2866854	64374	4564	NA	1854797	51026	6609
BARNECIELA-j3-exp1-plasma_193	4	12761	47	650	2435	237865	301507	4679	3533	6384	8744	1725814	36218	6540486	82	819	3494	85807592	112222	54	1546	16342	49161	39486	447232	141682	130504	3080	392403	148111	1150225	192	420	134	272219	664	583453	26	1028974	93	5811211	844697	2305929	40705	4590	39	2145663	67093	4643
FRAGILIS-j7-exp1-plasma_217	66	11898	105	618	2422	158358	281115	5156	23106	7700	5659	661286	39637	5734498	183	913	3114	52538883	152476	375	1209	8813	79150	30433	611563	67675	69261	2713	284628	97943	1021248	6676	429	135	208639	581	516825	96	875261	2960	7271865	461378	1565629	45277	4105	3652	1900905	45415	1573
ATB-j3-exp1-plasma_177	9	12236	95	653	3199	259488	603918	4275	28906	8062	8040	1113561	34062	4917599	10	891	3307	60395933	118254	26	1470	590	105646	57091	884407	141463	64430	2522	302453	95824	789327	143	452	116	309053	774	586216	29	970311	167	9559621	773631	1881818	47370	5417	46	1431223	51764	2552
FRAGILIS-j3-exp1-plasma_190	13	12071	85	2208	1575	238479	393759	3963	4535	6157	6745	1828008	36229	6032499	49	895	2894	79396129	121436	357	901	3029	49383	59415	521196	132838	100094	2711	420238	109422	1022171	9277	349	157	269934	491	602473	235	907926	492	7337069	731693	1682387	38800	6156	832	1922154	56481	3468
FRAGILIS-j14-exp1-plasma_241	193	14076	82	865	2769	176761	444359	3938	13934	8099	9672	942511	51659	6355391	382	937	3458	51581291	156694	833	1408	31837	44986	46946	806425	120481	148221	3321	354693	162104	1523804	5111	697	123	242292	645	578377	1112	1088564	5056	7379016	666783	1995768	47651	8499	12409	2842464	65696	2182
Nacl-j3-exp1-plasma_171	14	13094	42	1084	2371	149630	272666	3356	6269	6117	10556	1208350	41757	6758418	257	1180	4300	78221891	104085	375	1426	24405	52193	56284	713366	119564	116702	3430	379930	181628	1422669	1786	674	150	215529	665	564668	295	1106312	905	6231264	755316	1567519	52753	8301	2325	2547096	61646	3668
BARNECIELA-j7-exp1-plasma_225	19	18667	76	848	1250	147536	154257	3825	3529	9440	7661	1513925	57133	7585560	91	674	3395	92171641	204849	210	1289	7013	94206	41199	576933	207339	131336	3269	319452	170864	1527421	1464	251	139	200550	506	529480	89	1062005	784	7089940	846340	3628397	70711	8875	58	2627309	69911	5413
HIRAE-j3-exp1-plasma_183	5	11866	89	780	2614	199162	505062	4927	9239	6849	6649	961566	34915	5978760	92	1005	3869	77660233	96057	48	1151	474	47272	46319	613320	95844	82533	2338	336991	99385	1543683	63	729	118	298041	875	576529	21	989621	198	8362728	486165	1931668	39690	4936	32	2751972	65207	2116
ATB-j14-exp1-plasma_233	8	16679	88	933	2214	155342	392475	4133	6605	9580	7228	1575947	36612	6923498	107	642	2873	88929980	124384	38	1446	604	59587	58468	749541	184004	126959	3756	321625	141002	1556679	119	390	118	225177	658	575701	28	1034055	35	6446740	1113309	2657956	51637	4226	45	2859189	51947	3521
HIRAE-j7-exp1-plasma_211	525	17650	122	888	3923	241680	449285	4051	51249	8304	5939	994397	50633	7639557	208	1294	3253	55502044	190998	318	1384	4737	51540	46551	637033	103481	97609	2273	323358	131991	1134437	11682	467	126	223959	629	538925	411	911982	5444	9526063	578486	1890745	45718	7305	39	2134288	56659	1135
FRAGILIS-j14-exp1-plasma_246	75	17369	91	922	3373	242664	507429	3736	24515	8334	7224	825369	42810	7686060	112	1548	4342	53621756	126302	838	1492	32048	58437	52185	699721	109727	127360	3685	347108	152525	1248192	3340	642	130	235705	700	572782	770	997977	2303	8542121	647718	1896766	40643	8254	9037	2296329	67827	3182
FRAGILIS-j14-exp1-plasma_243	24	17216	96	1055	3686	287256	696935	4400	24958	10065	10324	882198	49357	6678657	14	1185	3823	47850392	169297	880	1337	36842	49080	45008	822878	108795	111859	3491	279680	155689	901065	3498	584	149	221837	579	551699	680	1079372	1145	9599631	581438	2031951	63416	10876	8621	1675842	67914	1921
ATB-j7-exp1-plasma_205	6	11413	53	467	2186	109094	324867	3292	13974	7473	8927	1068279	34031	5198269	9	713	3478	85341333	87961	63	1811	722	56314	58356	1182198	82378	123918	3781	397274	110607	1971036	37	347	156	271825	701	611545	34	1051315	27	6751692	558021	1284520	29564	3904	43	3528015	44167	1851
Nacl-j7-exp1-plasma_201	259	16503	81	1407	1605	201077	377120	3781	5029	6202	8659	1174455	44288	7017790	459	950	3249	63068815	140009	1213	1663	21862	45186	41650	585872	100543	137020	3030	335482	153257	1172527	10144	413	139	225688	749	575549	1788	982715	4478	6617839	598774	2025696	65290	9410	4084	2101051	77549	3080
FRAGILIS-j3-exp1-plasma_191	6	15456	58	4032	2055	322344	438324	3719	3886	7490	8185	1995121	32921	6230254	61	611	2998	105280816	87238	219	1761	1302	62898	50064	400916	108051	90636	3263	395597	123614	2429250	4472	656	118	305690	717	677974	110	1116624	144	7937951	687015	1747919	34207	7705	327	4397151	56906	3166
HIRAE-j7-exp1-plasma_215	296	18109	107	860	1701	216653	349252	3494	8061	9862	8751	1417623	64550	8727464	329	832	4472	83343931	211650	512	1312	6158	53583	58347	756882	195842	146947	3966	355428	238053	2099945	14982	342	119	239614	536	596709	503	1054943	11190	8251702	841957	3242478	62684	8254	8951	3814608	118162	4993
BARNECIELA-j7-exp1-plasma_223	7	18482	96	901	2450	207133	245513	2709	12653	8426	8337	1504864	52825	7358881	13	865	2515	110036856	177040	65	1430	10177	82541	62032	1040631	177837	95171	3544	324540	159510	1108420	199	364	108	237679	746	573279	26	1178915	77	6775158	929226	2528830	70111	6897	25	1985546	86287	5071
Nacl-j7-exp1-plasma_202	186	15979	78	1043	2736	147753	280752	4106	6988	5426	10334	1171748	58885	8001063	664	918	3307	96650588	163335	1072	1369	30770	42441	47425	767904	113588	121349	4128	376713	171761	1122259	5522	494	135	219275	767	607267	612	1034341	3788	6067205	711762	2344851	56750	7537	3536	2113220	56578	2934
FRAGILIS-j14-exp1-plasma_244	121	15421	62	1089	3559	291412	687175	4496	16868	9814	9199	881470	59110	6987223	145	1413	4359	52972254	193904	1213	1394	32353	68670	53528	686032	107398	155159	3222	350997	191370	1579725	4809	659	126	244302	764	596816	1495	998785	2937	9439350	602888	2342843	47571	10654	11776	2936492	70635	2518
Nacl-j3-exp1-plasma_172	123	19727	101	1275	3368	192542	333662	5111	11621	6087	12475	1154854	64851	10072457	1227	1094	5732	125433719	189582	1170	1434	28140	43928	61813	1002936	206625	172503	4044	473690	284650	1052251	8136	446	160	225082	487	619254	685	1158302	4590	8119014	1037759	3305113	119483	12018	4974	1906282	63600	3708
Nacl-j3-exp1-plasma_173	141	18112	100	1177	2490	176754	288622	4762	5575	6058	10367	1238364	63130	7276194	1327	1023	4170	86404834	218338	867	1562	30140	43126	44035	723901	182843	123814	3654	356167	263842	1233648	8228	464	146	223875	547	564871	1770	1142967	4505	6517588	846282	3070349	80267	9485	4220	2210396	54881	2299
HIRAE-j14-exp1-plasma_240	157	15764	79	567	2149	194152	288002	3793	7437	7625	7676	1374378	53533	6877335	1785	1173	3828	87764822	168390	2043	1496	42774	45674	56095	629865	129477	157449	4138	406722	230465	1820494	20368	335	136	235850	539	570480	1286	1073102	7243	7321066	882440	1723005	51964	5742	10565	3329898	64810	4063
HIRAE-j3-exp1-plasma_184	6	14438	112	806	2353	224101	434317	3607	28258	6690	9139	1405365	33555	6943357	99	934	2474	87234217	79787	22	1314	821	53306	56020	860631	117522	91924	2913	366535	108625	1346821	34	553	123	310744	879	636546	24	1047131	57	8096852	580780	1532674	45273	4662	24	2512355	75591	2673
FRAGILIS-j7-exp1-plasma_222	84	15527	35	1184	1703	121630	141075	3674	5312	9680	7336	1381097	36861	6846517	133	1137	4274	66111730	115514	1072	1749	7606	100411	46057	439206	107471	119719	2887	326502	183253	1872709	5967	1224	120	232165	796	546141	253	1099349	10123	5518330	622644	2258689	55503	10307	1168	3353197	59466	3230
Nacl-j3-exp1-plasma_170	45	15171	89	996	3230	242002	472776	4839	12957	6911	8681	1057258	67141	6611262	354	1000	3438	79607456	214431	415	1509	19920	54358	57252	776563	102978	132531	3459	356461	229370	1250054	1803	405	151	231938	732	597134	404	1024886	892	8122118	715806	2460052	120746	10530	3308	2364920	71999	2858
BARNECIELA-j7-exp1-plasma_226	NA	16385	91	2005	2868	205379	311863	3957	6735	7106	9543	1396019	59391	7583317	NA	956	3706	92877234	196916	NA	1363	8639	65211	45978	713317	189465	147927	3131	334327	171887	1353508	NA	637	121	221670	592	549747	NA	991898	NA	7216842	916151	3172544	41431	9650	NA	2489732	64545	4034
FRAGILIS-j3-exp1-plasma_187	8	17684	77	1248	2616	327390	365800	3118	3812	7779	9742	2393562	52077	7492621	44	480	3646	118943828	148896	153	1685	4067	77228	58289	557778	156040	101425	3316	366759	178412	1313554	3798	352	104	338218	590	662852	52	1163175	145	6308410	962192	2547016	29979	6410	328	2280156	76994	6367
BARNECIELA-j14-exp1-plasma_248	23	14265	49	434	2190	156506	256944	2249	25228	9562	7460	899483	38628	5622932	189	1043	2850	54976355	93500	147	1577	7291	55432	59054	885459	74441	78033	3012	312622	122228	1540451	1010	420	94	212248	624	514221	144	1061584	928	8110498	460385	1273891	58263	7183	48	2992394	57029	2094
BARNECIELA-j3-exp1-plasma_196	1	13994	60	914	2660	244203	414268	3688	3436	6303	8273	1640472	28346	6429388	7	837	3838	105419556	71335	53	1772	13117	46957	41773	500313	96035	112672	3419	362433	115584	1102954	502	1148	90	295341	1046	623360	66	1207389	72	7195102	718138	1678356	46494	4272	41	1992543	68469	2063
ATB-j7-exp1-plasma_206	3	15740	57	551	2228	144751	397403	3066	11261	10265	8882	1281613	35900	5816666	102	773	3509	85738509	108722	37	1479	563	62336	62171	948022	127509	107497	3464	335884	115967	3029406	74	352	152	241811	677	597628	33	1146802	16	7313659	682995	1954761	50532	4833	17	5239495	55688	3371
BARNECIELA-j3-exp1-plasma_197	3	14840	56	748	1913	225502	410237	2653	5048	8660	8834	1599592	34824	6582903	9	939	2980	96309437	90582	50	2208	13826	40903	49486	521937	108138	115723	2146	380547	142061	1106098	111	1059	101	308850	1172	637422	20	1134366	72	7074608	705810	1900270	45917	4884	42	2045258	77492	3864
ATB-j14-exp1-plasma_231	3	13827	55	448	2411	155091	399531	3082	19614	9897	8092	1172357	33467	6297979	123	821	2399	88812472	106366	28	1589	624	56324	49551	800490	177027	117492	3126	318411	115159	1813652	83	346	116	243529	612	558107	7	1057518	19	7253749	1053058	2043384	60089	4422	39	3178013	43320	3087
HIRAE-j3-exp1-plasma_182	5	14724	43	538	1699	164176	229671	2623	2326	6052	5794	1771996	34281	6372339	99	540	3560	118861074	85028	46	1408	434	36501	49212	486196	137875	133221	2634	337180	140770	1337380	29	282	86	261310	648	540200	40	1034783	55	5078942	711124	2654718	22147	4730	64	2593500	59884	3342
BARNECIELA-j7-exp1-plasma_227	3	16670	42	360	1030	314310	337850	2549	4004	9648	11845	2152856	54905	7408149	94	687	4915	150585087	138705	31	1835	9288	57589	72688	943919	202827	205471	4666	387774	221680	1515015	199	233	105	242283	422	581404	46	1128812	110	7788396	936094	3146376	56772	7376	48	2671744	73567	7149
Nacl-j3-exp2-plasma_134	29	12867	54	1048	1290	160168	290867	4512	4277	6525	10406	1621843	45311	5942412	302	773	3791	108989906	154745	708	1629	28557	57350	46137	562971	153192	118917	5784	445240	192207	1381260	2218	291	109	283011	198	616521	227	1099035	1377	5756920	649816	2894803	48519	9584	2689	2616897	81008	2943
ATB-j3-exp2-plasma_142	7	12702	31	528	1359	131887	286346	4272	2612	7445	8850	1631159	32356	7391473	3	697	4036	115479701	86845	34	1570	600	53587	47797	760707	140327	129785	5597	572407	151077	3352199	86	192	104	290489	202	692022	15	1016163	40	5670110	664607	2091808	39150	5348	32	5917083	48667	3552
MITSUAKI-j3-exp2-plasma_154	12	13497	63	515	2243	177286	623875	4413	26981	8207	10735	1135343	25906	6000779	8	1076	2988	78853985	89106	157	856	765	61612	43773	994539	94729	83883	4612	486340	82325	2360010	3020	310	85	331777	243	734660	100	925101	947	8853883	529000	1419346	29834	4282	22	4331019	79843	1247
ATB-j3-exp1-plasma_178	4	12190	55	735	2720	199506	441513	2474	10268	5911	6874	1381937	32542	5366663	11	739	3188	93251808	84633	32	1213	514	52080	71749	526038	106084	114171	2592	439164	127980	1403898	50	374	86	307452	666	550387	29	1090723	32	7010856	681951	1509185	34654	4768	30	2745863	56333	3319
ATB-j7-exp2-plasma_166	5	12807	40	553	2463	149926	370319	5417	17897	6954	11655	1194837	28946	5772898	7	950	4113	96980930	73170	18	1324	597	87368	59658	1198800	97939	133128	4908	620772	110698	1981938	60	440	111	323060	401	716898	24	1099114	34	7440958	605221	2335123	23445	3994	11	3669775	51975	1817
BARNECIELA-j14-exp1-plasma_251	12	14942	79	967	1865	183590	245940	3472	5629	7821	7825	1112818	39520	6551922	180	1244	3826	79646396	97963	368	1251	8189	39671	48796	667291	98215	146803	3394	359493	135840	715171	1859	672	118	200112	525	466639	263	1028443	606	6576744	541847	2323505	36923	7511	49	1378115	60921	2119
HIRAE-j14-exp1-plasma_236	1619	13160	81	678	4106	240065	311492	2329	19173	7389	7422	1289261	44591	7708656	40021	1651	4421	85439702	96607	2380	1629	15600	52509	74130	783667	92992	164855	3157	408442	190914	1101478	297782	460	101	227345	756	523840	6871	1139608	36254	8074076	649687	1665953	58521	7278	170	2214614	65044	2280
ATB-j7-exp1-plasma_208	7	11162	125	952	2470	147131	409481	3387	33201	8281	7771	913692	34300	5268775	6	909	3891	71785330	78148	73	1441	431	49340	51082	1070314	91484	96699	2226	309946	96351	1060603	49	318	128	237408	689	517938	17	1025878	23	8187290	506128	1692274	39445	4404	40	2170358	46265	1021
MITSUAKI-j7-exp2-plasma_178	496	20828	61	450	2108	216099	366951	4230	21129	9306	8286	1285274	50149	8749646	15	1048	3856	77669073	160926	767	1343	1349	41251	41788	657283	112128	160696	3693	486204	154065	1516446	10664	303	75	311732	298	693702	258	960993	11847	7787382	705443	2303808	38841	6757	2645	2802086	77738	1255
BURKO-j3-exp2-plasma_148	13	13200	65	753	2902	303798	771109	5352	14001	7012	8165	1153505	38193	5826167	3	1145	4235	81653954	96187	103	1643	3446	47442	53420	693832	68120	99741	3823	494470	105435	1517276	2498	368	78	327060	277	667580	48	1063154	1302	10726028	547119	2367559	37826	8178	40	2818143	97531	2603
FRAGILIS-j14-exp1-plasma_245	86	14383	72	1006	4487	165387	292144	3410	19998	9646	8994	1003113	57895	5829085	215	1310	2425	66879636	142836	1524	1099	24789	37950	51170	933027	116557	116593	3190	358015	264081	1062220	8572	478	116	215686	678	516159	1911	1038781	3577	5421643	698877	1852333	56373	8794	9537	2120899	52287	2274
ATB-j14-exp1-plasma_229	3	10994	51	478	1947	100690	180529	2705	5860	6597	6824	1059104	33812	5844252	101	1035	2980	82232381	70216	64	1869	565	45686	55912	1039219	80175	165008	3053	372040	112984	1393567	35	677	102	256890	867	556919	31	1068552	17	4996352	741159	1254311	23542	5105	51	2697226	40267	1800
ATB-j14-exp1-plasma_234	7	14860	47	601	2682	154339	414776	1765	8275	7918	6765	1431966	41623	7427083	8	772	4270	103033790	102447	38	1665	667	56249	80838	716860	160647	171057	2769	359774	142671	1556192	84	290	111	238006	621	575763	37	1036926	38	8378825	902230	1598622	40000	6225	32	3059522	54705	2716
ATB-j14-exp2-plasma_185	4	14463	53	520	2030	136363	376443	3559	22859	10751	6679	1355007	37004	6372328	6	777	3638	95755217	116827	32	1424	596	73174	75286	688901	173610	109301	3913	482891	111061	902339	74	227	47	295805	308	692057	10	1095533	24	7542268	762815	2063111	63373	4307	33	1734906	57645	2312
HIRAE-j7-exp1-plasma_214	1027	17915	89	890	4247	282465	418921	3300	30989	9343	12608	1235575	60948	7904656	1157	1001	4169	76272437	145149	914	1505	15134	51871	60730	1531805	118656	156031	4894	667411	292762	1504825	35332	371	96	282107	637	666713	1947	1199054	11153	11001249	771327	1953515	86389	9174	6591	2658315	65805	1816
Nacl-j7-exp2-plasma_161	39	14770	42	831	2995	250542	438082	4677	6414	7908	8719	2221502	59386	7124977	314	1234	4573	140127520	207862	665	1653	36023	52143	68797	494347	184512	117121	4276	499688	225541	1520208	3148	440	47	289361	211	644241	201	1101503	1400	7943146	745423	4127344	82362	10317	3292	2827981	93563	3802
FRAGILIS-j7-exp1-plasma_219	155	19245	146	912	3217	360303	523855	4936	41549	14921	12546	1223942	174251	14488089	998	1147	5365	43864010	225279	1021	1865	33446	70985	116020	1651266	152797	145407	8690	622248	292717	4427646	13783	332	123	372984	622	1095222	657	1559319	5550	14412417	1053328	1734494	550503	10473	16705	7909287	108816	4969
HIRAE-j14-exp1-plasma_237	60	15014	99	809	2331	171936	405469	2620	10967	8030	7354	781331	61604	6891817	1708	1243	3822	72438031	176131	715	1663	14529	57800	57941	602247	109630	129603	3275	469247	216703	986532	12331	548	100	223106	740	513557	1279	1144260	6858	8363547	703736	1534859	60070	6040	7493	1852103	50514	1419
MITSUAKI-j14-exp2-plasma_197	10	18312	76	718	4193	210559	339933	1818	17161	10541	7846	1072678	75678	8654906	5	836	3901	98085674	247554	514	1199	7612	79018	61124	682560	209170	128894	4181	550904	296006	1386846	1187	299	72	335867	311	783864	356	960539	878	7830944	757489	2806827	82403	7677	2514	2638932	53865	2061
BURKO-j7-exp2-plasma_172	6	14040	31	728	1633	165967	242457	2166	4909	8856	6745	1659370	52591	6477093	9	855	3517	96321082	173516	101	1270	7377	49449	48888	565087	135569	122231	2907	503129	210642	1799556	334	217	70	274915	198	647124	120	965372	323	5332689	699294	2775152	36777	9137	805	3214103	76281	3180
FRAGILIS-j7-exp1-plasma_218	12	11858	81	838	2601	187934	391403	2438	18243	8533	8182	923725	30054	5537740	176	1355	2823	72300550	79328	103	1343	739	111411	55363	838911	84102	79769	3523	396925	88028	1233101	3232	506	82	240158	813	540271	73	1083429	650	6662413	615467	1164251	40453	5864	36	2508277	95759	1878
ATB-j3-exp1-plasma_176	4	12880	53	700	3438	242013	434759	2692	7596	6245	8142	1202245	38690	5629519	137	988	3830	90006073	97329	68	1647	388	59882	70985	767482	97109	117299	3571	430792	134888	1260357	50	671	118	348158	922	614056	28	1215144	21	7986597	667526	2330751	29221	5757	39	2403039	56889	3195
BARNECIELA-j7-exp1-plasma_228	73	14097	127	853	3433	230551	552988	2234	15444	10171	7089	732279	55433	7530727	280	1050	3587	72538869	139609	295	1455	16387	87894	69388	646436	79057	89746	2923	378829	153104	3315577	8193	635	105	264523	724	561730	197	1073674	5678	9237782	413108	1548898	37589	6941	15220	6099488	71771	1410
BURKO-j3-exp2-plasma_147	19	13351	50	943	3236	284048	721293	3253	27412	6541	7378	1348753	38776	6149675	5	1542	2757	82877257	109691	216	1298	3715	42007	52326	734527	98110	81842	3651	454337	92351	1013589	4540	392	57	342830	337	674566	72	1011387	1724	10613444	537975	2064706	35164	8251	43	1858018	117450	2220
Nacl-j3-exp2-plasma_137	174	12573	44	699	2062	220912	322642	3097	4926	5934	10285	1549798	65119	6729105	649	978	4649	108730685	182689	789	1767	35250	69629	65100	551588	135426	166132	3751	445373	284918	2121556	2562	309	87	276431	266	627098	833	1065896	2834	7383949	720722	2354292	71654	14940	3949	3778785	74130	2373
ATB-j3-exp2-plasma_141	2	14410	64	575	3040	184410	486031	4019	25814	6889	9150	1422828	50786	6956074	10	917	4281	100122960	156589	20	1349	855	81576	75013	841579	166591	137659	3427	438750	132563	2348043	16	350	97	314281	283	700418	13	1073989	26	8257346	802510	2867028	66699	6658	34	4232722	64054	3051
HIRAE-j7-exp1-plasma_212	148	14766	117	1034	3686	193947	403991	2652	23559	7545	6609	815115	45718	5949267	346	1210	3739	63549316	132393	390	1939	2607	42844	63292	689951	74418	88677	2531	331294	120408	1527616	8502	494	66	253115	732	532673	497	1057017	2799	10184138	478045	1723468	48798	5960	5109	2908881	51025	928
BARNECIELA-j7-exp1-plasma_224	29	11694	105	667	3402	178306	295596	2366	26901	8090	5261	823351	51108	5996405	63	1266	2919	62993135	163475	451	1768	12858	52653	53226	735853	65361	116678	2554	337812	152477	1223624	3185	927	105	251919	1036	565833	297	1078251	1348	7329859	431805	2014889	40573	5881	2004	2387685	58612	1759
Nacl-j7-exp1-plasma_200	134	13809	58	1661	2045	211968	343598	2447	4299	5698	7342	1445491	49844	6304386	136	673	3353	94779952	144063	830	1576	18658	48131	60116	391890	118720	115014	2800	394179	195230	1562940	2804	680	121	229946	814	595443	490	1113063	1652	6088358	638855	2397227	58255	9893	2895	2898102	72131	4950
MITSUAKI-j3-exp2-plasma_153	75	16717	64	702	3560	306661	685403	4376	12761	7837	10840	1330178	43819	7902140	20	1279	3855	105482282	105242	978	1373	699	89517	67955	937974	116550	128689	4114	544708	143657	2090276	15903	526	102	376920	530	727471	623	972980	13999	11251099	704368	2762124	31713	6545	40	3747805	86543	1280
FRAGILIS-j3-exp1-plasma_188	3	13975	48	1108	3157	529793	482401	2339	3097	6367	7468	2664256	52689	6949951	46	697	3378	118897511	146773	198	1821	4551	71974	70172	431985	142669	167651	2672	441207	184699	1246766	7290	277	114	314081	764	603181	95	1117367	206	6931135	1036380	2449401	32120	6084	84	2368457	75759	6384
HIRAE-j3-exp1-plasma_181	NA	15638	66	730	2480	205043	385891	2635	4001	5411	5687	1977283	48114	7176468	NA	655	3487	129125743	135207	NA	1440	699	44909	52369	496850	209117	105139	2525	397797	188200	1885894	NA	549	113	303123	979	580487	NA	1014083	NA	7131711	838667	2693575	20793	5407	NA	3563346	76490	4154
BURKO-j7-exp2-plasma_171	5	11291	62	687	2128	201539	379950	4401	5162	7923	8025	1075967	48988	5475093	3	902	3437	96207477	126964	122	1367	6714	75069	50998	493832	92438	110155	3699	549338	170836	1801374	543	408	119	311042	327	687605	29	1017520	282	5948032	463340	2213240	21535	7225	170	3377487	61550	1567
ATB-j7-exp2-plasma_165	7	11781	42	555	1493	146461	396736	2862	4787	8513	13472	1346222	30406	6882444	3	745	3074	105833511	67583	20	1237	483	115368	57410	1033464	131594	144891	4380	562541	124211	1965509	26	167	86	305018	231	668279	39	1083266	42	6569756	781119	2054604	48150	5085	39	3664154	48278	2273
BARNECIELA-j3-exp1-plasma_194	12	12939	47	691	1702	215853	407051	1891	2603	7748	6809	1868811	28319	6232199	11	572	2864	106570281	75076	53	1611	9356	41269	55390	455065	130662	75885	2658	370329	101798	1266831	116	322	88	287015	693	604468	40	1173134	186	4903221	817162	1617897	62265	4712	27	2388922	57659	3268
MITSUAKI-j14-exp2-plasma_196	20	16265	109	811	2535	192115	434224	3516	29428	9135	10847	800776	49549	7130499	886	1066	3848	80477972	145446	605	1192	10243	73871	75722	1004900	142811	122264	4335	568544	173446	1595608	2118	386	109	340653	411	748436	698	1011178	2679	8805590	617983	1976507	53644	7433	6851	2820396	54014	863
BURKO-j14-exp2-plasma_190	26	13024	103	1319	2622	181729	447511	3940	24338	9060	6506	833934	38676	5256076	99	1572	3310	64574136	129868	122	1222	1801	64761	51885	667390	108592	71341	3024	435368	84334	1318582	2311	410	96	324687	453	650436	136	1037059	1706	8454051	477917	1948096	39578	6435	30	2448725	67812	1445
FRAGILIS-j14-exp1-plasma_242	91	14925	83	920	2631	246461	466363	1836	7593	8536	8255	960421	70709	7125489	106	786	3970	81095449	188574	689	1615	18138	43907	59952	654494	85961	148009	3083	383809	284578	1937112	5216	611	103	238097	609	553946	457	1134309	1633	8000334	640024	1995440	44864	10500	3263	3761892	78201	2459
Nacl-j7-exp1-plasma_204	136	14844	83	1163	1904	160870	399913	2143	8963	6544	8745	779187	39107	7010834	306	1491	3422	84206655	103162	986	1472	28822	37369	56263	550589	106420	89152	3106	404807	118919	948673	4848	626	89	243895	915	581169	987	1189951	2796	7151153	566933	1561114	51603	8224	5702	1923252	64037	2674
ATB-j14-exp2-plasma_184	1	13861	61	639	3148	150597	405230	3472	16934	12927	7793	1251640	44816	6819795	2	970	2602	72670296	97959	42	1748	698	64149	73586	1069235	136982	96883	3721	461590	110734	3044591	64	445	53	319359	496	701125	8	1100409	11	7527319	697560	1586574	45786	5469	20	5522366	58955	2431
BARNECIELA-j14-exp1-plasma_249	41	11159	115	924	5274	198187	417697	2388	37009	9258	7545	631193	43889	4773222	425	1840	2432	54331592	128245	458	1348	7395	39888	61187	859968	79180	78416	2980	411663	122260	836644	2013	642	81	247668	532	530225	465	1017313	1597	8830451	461799	1564984	40494	7252	109	1668980	57182	2148
Nacl-j7-exp2-plasma_159	121	15319	44	759	2808	242760	456828	2532	9592	8813	10245	1378626	70673	8354377	1208	1177	4091	100658464	237941	1566	1341	40115	48049	71395	579174	158529	164942	3719	730702	286260	1571085	6147	445	105	326594	291	707913	967	1107020	4052	8017018	785173	2317512	81918	13770	4481	2917254	77116	2488
FRAGILIS-j3-exp1-plasma_192	16	13198	74	1334	2915	318462	609542	2129	4776	6898	9354	1325148	34989	6961487	26	849	5910	101376994	73217	100	1570	3401	66377	65393	487870	83082	162608	2834	501109	152411	1221072	3452	566	79	293994	733	600356	51	1084966	180	10344591	621106	1368982	37937	5856	34	2302412	56371	1633
ATB-j3-exp2-plasma_140	10	15736	63	438	3017	210044	484317	3766	23729	7186	12188	1260932	50503	7484909	6	935	4632	105529948	135243	49	1425	1021	198274	91303	1238550	123108	162577	4942	546755	145099	2408281	379	369	82	320925	264	723859	39	1143904	255	7582897	809411	2642345	62272	4862	29	4223046	70731	2919
BURKO-j14-exp2-plasma_191	68	13687	13	47	295	158767	263104	1263	1387	10342	9075	1297843	45926	6726054	932	374	3288	64810958	136033	220	1287	4850	55935	47426	845353	91345	119223	4148	421668	178968	1793990	4615	4051	86	305309	90	641684	295	998638	2267	6545017	573316	1945452	37047	8477	32	3320191	69547	1677
BURKO-j14-exp2-plasma_189	36	14911	54	749	2200	146036	196979	3242	38453	10104	8707	1339466	42951	6982566	233	1101	3333	77657180	118706	107	1679	1507	43246	59887	1024646	134526	118692	3370	1080452	144282	2171377	2870	243	101	358309	327	775138	179	1144940	1976	7388621	633666	2303063	111925	7794	42	3778047	58164	1148
HIRAE-j3-exp1-plasma_186	8	15038	86	836	3863	266213	475475	2494	22313	6546	6487	1470569	38328	8516918	94	993	4036	117135993	91347	199	1463	856	59458	68962	782374	125451	152438	2808	521321	146390	2111177	40	572	81	345227	919	676168	51	1065089	59	9593824	733615	1828606	41860	5929	59	3986413	76642	1527
Nacl-j3-exp2-plasma_135	19	14036	28	1069	1721	142781	144541	2834	4774	8594	9100	1744604	69013	6898788	307	1105	2925	114385878	206280	645	1498	21890	80366	56990	433012	177822	79723	3112	508915	289701	1928712	2033	284	92	280436	177	674724	593	1118393	762	4995045	877069	2440797	71892	9906	2142	3454064	71564	3103
HIRAE-j7-exp1-plasma_216	268	22829	113	984	1439	271687	359535	2022	4823	10329	9493	1759137	62124	9813113	258	704	3971	123240599	149643	378	1809	9047	52590	82164	898637	200594	159162	4136	441356	235248	1174388	15643	262	139	254329	687	665242	390	1261020	5799	8584586	1022178	2942251	105227	9962	7003	2339631	120339	5138
MITSUAKI-j3-exp2-plasma_156	17	13512	48	496	2097	317663	674577	2703	16147	8056	6827	1188029	34383	6973927	10	1556	3181	86698753	103225	187	1236	720	69294	56295	625868	85826	90124	3068	461834	98538	2008395	4926	366	93	339956	296	742423	88	1042304	2040	10317678	550719	2045233	32473	4666	67	3752554	76384	1165
Nacl-j3-exp1-plasma_174	NA	15826	63	1349	2946	216163	318226	4218	6305	6724	6817	1437091	56335	6817956	NA	908	4389	105849449	154652	NA	1282	28079	37782	53141	525926	143651	135000	3799	444743	254378	1360323	NA	374	118	210778	567	522978	NA	1078212	NA	7064808	671733	3183039	72516	9424	NA	2643475	78389	4325
ATB-j3-exp2-plasma_144	3	13294	77	556	1366	195139	455373	3102	12150	6811	8401	1429380	37194	5732762	3	915	3651	106591274	111883	7	1582	443	68240	54451	1045393	125035	88963	4007	561628	103764	2161359	44	357	108	381272	288	743244	27	1085319	19	7663518	574786	2750322	41187	5113	42	3852250	57926	1250
BURKO-j3-exp2-plasma_150	21	20630	48	660	1807	347162	850297	2910	8753	8826	7707	1902932	56636	10449384	9	1455	4314	143497654	159063	194	1746	3769	61615	65128	699211	178985	129224	6458	656356	155959	1835096	3886	369	98	417096	247	756123	52	1152745	1438	11057421	851761	2789374	55403	7089	1474	3255191	102983	3628
BARNECIELA-j14-exp1-plasma_250	186	14013	55	751	2925	164771	347241	2053	12536	8413	7440	1044893	52535	6106465	1039	1581	2785	60131532	158488	1136	1360	12806	34397	50077	663669	88675	93482	3046	395631	213276	1541394	4040	573	108	220374	567	535343	917	1055111	2287	6422486	650362	2157650	43686	8974	70	2906395	68487	3045
MITSUAKI-j7-exp2-plasma_177	126	14971	54	402	2070	375076	771907	2569	16809	10088	10370	1142347	66240	7364505	618	1435	3320	94139061	185868	1082	1641	1994	61702	74109	697704	109179	143247	5118	663622	187266	1804143	7010	355	113	375532	265	791422	316	1092239	3247	11615424	674968	2147625	39019	7263	5834	3249258	83083	1732
ATB-j3-exp1-plasma_180	9	16387	62	725	2918	193082	491616	2591	5810	7179	7090	1232803	36252	7042385	13	676	3436	101449848	86627	83	1307	451	253916	89174	631434	128551	123427	2821	442302	131286	1821144	516	407	79	315522	896	607066	46	1127744	378	7913145	727739	1946845	36950	7163	31	3440121	55764	4117
HIRAE-j14-exp1-plasma_238	212	15484	102	810	3281	185861	323774	1935	18513	9219	7394	898425	50529	7172051	1233	1206	3625	73873254	157148	1497	1499	14872	49515	72919	611062	110878	107527	3297	345490	180026	1173794	18398	361	129	236568	810	569687	1923	1192600	7312	7376435	711443	1531935	57361	6500	259	2287237	51141	6488
Nacl-j7-exp2-plasma_160	117	11898	47	1004	2880	215886	467529	2274	16988	8702	12757	1192621	84472	6540695	1687	1345	3913	83739030	169325	1354	1363	29842	53264	57150	1320761	108985	109812	5118	602855	201089	1909783	5487	457	92	346471	350	742045	888	1161338	3958	8273104	867481	1911146	50326	14520	5661	3351390	71752	1284
FRAGILIS-j7-exp1-plasma_220	38	15138	114	873	3818	343321	591483	2390	23526	9477	6673	883286	56755	6704328	372	991	4371	80455756	154270	287	1253	17870	93233	64739	611493	83460	118271	2693	439875	167678	2429533	4630	618	85	277518	711	605367	190	1090761	1537	11537963	617501	1796321	39681	7600	11082	4633263	62092	1188
MITSUAKI-j7-exp2-plasma_179	178	12436	94	505	2386	329464	609724	2776	30358	12185	7060	811902	71590	9562492	383	1649	3425	39168187	109891	484	1483	14540	61001	72527	743005	75970	102012	3989	402335	173483	4310635	7425	445	137	357048	344	733085	238	1057867	8018	10987109	315197	876490	22410	7860	6594	7431370	93190	826
MITSUAKI-j14-exp2-plasma_195	40	13168	104	546	1499	248958	519918	2457	11433	8009	8224	786284	66924	6790618	494	982	4226	83975490	192420	730	1667	20452	88001	91188	744948	113926	138536	4158	740605	175672	2430622	2405	434	102	379116	391	797473	484	1156455	3841	9323130	531858	2196631	43749	7608	7002	4400406	66614	1325
ATB-j7-exp2-plasma_164	9	16308	38	637	1667	146919	462246	2421	10776	10355	10651	1549688	36946	7450650	3	788	3798	103120121	90040	38	1910	463	149581	81138	1029665	163332	114927	4548	576644	124567	2049058	37	198	72	344916	383	760438	15	1260865	14	7478171	860546	2166556	64102	4854	32	3749011	55089	1615
BURKO-j7-exp2-plasma_170	7	14730	35	913	1602	190514	305594	2667	4724	10208	7071	1625207	56611	7387504	4	905	3767	114459337	144399	147	1363	4340	186519	76111	528856	135401	149358	4000	615195	191939	1716710	462	263	96	298507	290	719357	68	1087945	255	6242757	672528	2303426	31968	8410	711	3042408	71888	2346
Nacl-j7-exp2-plasma_158	16	10457	30	1009	2163	225171	385908	2258	5042	7735	8552	1585333	51591	6220737	457	970	2889	104597008	142307	461	1434	28127	55125	63811	362361	111716	134781	3919	520253	201807	1481759	1993	481	67	310860	333	728232	525	1304758	709	5872354	759694	2255517	42619	11063	1775	2609282	78850	3214
ATB-j7-exp2-plasma_167	2	11710	29	359	1037	159139	504619	1573	3666	7298	8913	1276424	32467	6288020	7	664	3500	122131742	82292	37	1481	626	438904	109582	680891	145818	121488	3867	674851	120150	2262809	299	167	85	333987	192	765595	31	1098308	163	7740632	776571	1946206	32833	4979	20	4067263	53744	4559
BARNECIELA-j3-exp1-plasma_198	NA	14831	48	674	2444	184701	355386	1891	7089	7091	7770	1461575	27122	7131094	NA	911	3290	90291964	59886	NA	1439	12759	35589	52505	662393	114021	115011	2410	383612	99555	2390521	NA	455	90	290085	876	611964	NA	1142288	NA	6886221	704210	1488256	44114	4529	NA	4317992	59581	1443
BURKO-j3-exp2-plasma_146	8	15875	63	618	1981	349403	608914	2435	7051	7523	9338	2040224	43750	7645223	3	886	4761	114570694	93712	69	1213	3790	63018	79267	994657	126749	134730	4518	621066	167754	1477783	547	389	94	355422	325	740415	50	1128023	64	9392037	848919	2224198	57693	9344	38	2680552	91155	3184
Nacl-j3-exp2-plasma_136	35	15731	56	657	1352	141143	149087	2225	7139	6549	11017	1716677	72025	7947789	1268	1032	4255	121899941	206148	1040	1283	27486	98289	81886	809234	193288	160793	5214	518457	295727	1711142	6908	466	99	389902	419	710901	1161	1224054	2964	6579658	801989	2364267	81391	10926	3105	3057163	75448	3531
Nacl-j3-exp3-plasma_135	110	10646	163	1333	5191	150267	311035	6561	41039	9037	11675	686035	44809	4081202	840	1364	3012	39166197	204304	924	1308	18490	69091	21385	631850	106103	53306	4304	442030	157221	1031929	3760	427	212	210584	372	661044	617	673395	4970	6953338	351629	1455626	44765	6587	5224	1949007	49269	1253
MITSUAKI-j3-exp2-plasma_152	11	15803	51	524	1773	337580	589493	2690	18117	8201	8927	1625068	49054	7277227	9	941	4121	100216949	140013	108	1661	903	74153	77548	976645	125229	139907	4792	695543	166345	2369806	3503	210	65	355081	253	761652	69	1169117	467	11233055	732800	3053256	38128	5574	34	4149391	88040	1776
FECES-j3-exp3-plasma_148	5	10051	105	889	3513	243307	696986	5414	43486	7412	14649	764616	29999	3785783	50	1771	3640	34488905	120026	284	1238	961	58203	41218	969050	82260	75029	5004	509423	94789	956890	6520	652	294	289562	755	691507	175	692723	190	9151494	469031	987785	38762	9139	30	1812395	79617	3025
BURKO-j7-exp2-plasma_174	2	22375	66	629	1750	269991	431733	2760	5001	9732	8094	2143693	70422	11274701	2	790	4901	141140910	186603	123	1053	20030	71573	72186	703900	243270	171971	4121	596705	288656	1754825	419	186	79	285606	184	703432	52	1030079	137	8889387	983997	3721509	69993	12016	500	3138195	129531	3940
ATB-j7-exp3-plasma_165	5	10292	90	759	3325	193751	568238	5232	47433	8106	11394	1191130	22378	4489442	8	1338	2448	46006896	97507	53	1119	537	61516	39653	688344	119036	72280	3971	524552	80303	578057	86	424	145	234695	348	643848	26	690420	61	7604549	559664	1163029	58411	3485	86	1135294	54995	3759
ATB-j14-exp2-plasma_182	7	12266	74	628	3352	119180	367971	2144	19819	8241	6488	846122	34921	5878714	6	939	4683	82623013	97491	26	1503	759	70328	58456	715361	122845	106254	2951	507826	107832	2485627	114	362	87	339384	663	738922	31	1132520	21	6866877	724156	1582323	46328	4064	33	4405498	43466	1140
AKKERMANSIA-j14-exp3-plasma_195	84	11438	63	1013	2292	120308	219490	5937	7775	8769	9467	1543323	35301	6203682	908	1282	2706	63891836	154719	1365	1227	17080	54905	30651	493335	168122	125699	14396	337654	141556	503293	2276	343	392	204932	320	576316	219	721535	1885	4644387	728675	1498860	111616	8734	2120	996210	53111	2911
Nacl-j7-exp3-plasma_159	27	8756	243	2854	2401	138178	474437	5247	11608	9075	13031	1211063	26827	3648778	135	2174	3308	43820623	110163	142	1182	9973	94057	31981	470080	87410	81941	4767	541234	163852	619765	455	535	203	247378	449	612160	158	777471	696	6381011	339058	1444241	53004	5976	2045	1172707	67576	2830
MITSUAKI-j7-exp2-plasma_176	152	13672	52	466	2266	289943	568778	2924	15440	8990	9356	1147222	56858	7321982	471	1653	3882	88113023	145570	739	1514	1939	63182	73556	760555	100092	163876	4459	574604	209442	2466005	7633	421	95	347219	396	739917	313	1180609	5898	8384775	677725	2506567	30442	6538	3133	4435620	85520	1948
ATB-j3-exp3-plasma_141	3	11496	70	871	2469	117250	219374	4781	10040	7599	11469	1674582	31018	5564102	4	795	2385	73933440	138186	23	1400	460	70117	44098	482572	220900	64937	4250	414967	108535	758936	59	232	366	203327	549	574621	26	753853	95	4815721	736305	1612236	66958	3468	13	1471798	66631	3571
ATB-j14-exp2-plasma_183	9	12813	60	445	2418	158000	478861	2473	17078	9761	6378	1501123	45959	5840617	2	797	3009	91758729	120392	7	1514	564	94895	87889	853190	121572	106823	4222	579544	102543	1228843	69	268	84	330280	270	760839	16	1118652	29	8804197	801646	1742594	60559	4735	42	2301377	59358	2839
FECES-j7-exp3-plasma_172	10	12241	88	1380	3654	328121	463381	4708	14249	7530	7421	1007482	27033	5153060	144	1827	3353	61628310	108371	349	1099	12553	76913	35195	471878	112956	91348	9205	337565	104994	829674	5433	367	402	205015	470	584327	274	711649	222	7142812	409802	1054896	41169	5947	28	1582664	105377	2929
BURKO-j14-exp2-plasma_188	7	13786	43	937	1333	149372	277494	2221	4050	9282	5927	1194961	34858	6635765	4	1359	2755	84381167	94368	22	1355	1436	121132	71448	369655	106630	109270	3101	504854	114713	1576301	657	580	77	338582	449	761045	54	1075354	575	6200447	603017	1937748	41199	7310	33	2812538	92383	2079
AKKERMANSIA-j3-exp3-plasma_154	11	12624	106	6068	2544	161097	496516	4667	23109	8840	10696	1024770	24825	4188250	9	1506	3486	54069148	122431	148	1598	494	65374	33815	466459	136027	48374	3935	482048	64219	653644	2104	507	281	242385	581	644530	67	688003	109	6514356	554865	1091402	47327	6030	27	1256265	58991	3337
MITSUAKI-j14-exp2-plasma_194	11	15459	79	537	3614	193240	347121	1660	30400	12787	7958	961169	54287	6611677	203	1020	2687	51716134	185722	422	1318	6272	291605	97633	688990	99979	62061	2975	511183	130395	1588290	1264	253	70	330090	314	734233	381	1135513	2603	8096956	504718	1709055	144628	7668	2913	2971336	58960	1858
ATB-j14-exp3-plasma_182	2	12375	51	769	1986	92067	194614	5412	8146	7845	9641	1930396	23341	4848273	3	894	2830	72139126	79486	60	1240	523	51839	53348	596246	131572	122258	5202	336088	115968	953550	89	357	290	180433	302	564029	13	772294	63	4664174	759612	1308934	40086	4311	14	1892621	47824	3761
ATB-j3-exp2-plasma_143	2	11594	46	526	2023	249290	641801	2093	16373	6836	6814	1127575	39078	5943626	7	986	4402	92141792	87738	19	1722	711	77756	80614	788510	96926	117339	4085	651874	142131	2053092	70	390	144	360824	424	730124	18	1075397	29	9500116	467418	1743420	39552	6003	30	3813175	60073	1301
FECES-j14-exp3-plasma_191	5291	15091	53	1212	4322	221249	656154	5573	27079	8509	5867	856603	37673	7011184	166	1736	3107	49687743	153777	16551	1005	8082	30904	26740	363316	294347	152538	4062	305116	249445	519765	86068	2572	320	202979	548	559703	27050	607513	179310	6258766	576830	1283175	59348	7540	20477	1006538	51095	1578
BURKO-j7-exp2-plasma_169	5	13401	50	1040	2152	156118	276690	1814	6694	8577	6707	1285264	54587	6382592	2	921	3047	99003734	163229	280	1677	8349	114486	53542	465800	125333	75195	4307	403118	191847	3483065	514	405	67	306299	377	718715	88	1108725	136	5160426	756352	2023017	49488	11171	1709	6091863	81315	2653
ATB-j7-exp2-plasma_168	3	13925	57	535	2056	182013	435796	2040	23582	7320	8969	1389464	32792	8386949	10	942	4059	113755685	69431	5	1491	665	63494	67598	791966	140156	154082	3468	527518	130241	1904326	31	360	58	352902	427	733247	12	1056728	20	8307939	584955	1858167	49922	4894	12	3397175	51356	1225
Nacl-j3-exp3-plasma_137	44	10716	40	1160	5358	251542	299360	5922	10648	8626	10593	1434314	46537	5014352	236	1164	4388	61755899	203860	364	1353	22881	104276	47541	476288	112368	97081	4407	462854	243473	1207255	1345	314	264	212123	316	696626	129	748598	1301	7745449	475889	1475802	60649	10417	1722	2299038	60737	3593
Nacl-j7-exp2-plasma_157	19	13112	37	875	1335	179314	300638	1852	2963	9690	9952	1432233	58016	7349904	540	825	3022	87377748	128623	734	1523	30368	120567	67235	420048	125113	121804	3641	586260	225039	3513134	2097	191	54	349778	285	755942	456	1208250	1102	4621729	542374	1950573	28992	10695	2457	6040861	71573	2912
AKKERMANSIA-j7-exp3-plasma_175	8	11014	98	759	2220	164991	238514	5494	6944	7753	8887	1601289	32677	4987081	180	1356	3055	85971420	138588	157	1378	9007	68513	41354	396906	151937	80359	3983	354705	100821	788697	4729	446	409	199565	352	578608	361	754664	174	5736480	655003	1262703	58174	3226	54	1466810	57423	3364
BURKO-j3-exp2-plasma_145	9	15129	62	655	1570	216102	349008	1787	6030	6399	13006	1994217	37786	8294963	5	788	3401	126443870	82578	136	1528	3507	46011	78381	1194439	122483	137359	5303	588682	146803	1385197	3221	328	80	346093	378	723583	65	1155415	1193	6837375	872623	2372358	52259	7394	389	2594671	105970	2963
FECES-j7-exp3-plasma_169	28	13571	65	1550	3576	371093	293564	4621	12990	8506	9317	1060266	38956	5155550	1437	1553	2490	65024381	175201	1122	1447	8308	76286	39610	454182	122903	90615	6110	320001	144045	613428	33438	266	268	195503	237	600548	1553	715216	661	6881613	535242	1531444	49423	4981	40	1174162	140253	2814
Nacl-j3-exp2-plasma_133	136	13480	55	831	2200	250480	510588	1827	22213	8029	9720	1127367	51160	7656340	737	1521	4753	91696856	126002	1708	1572	38557	48930	82712	721407	118652	144089	5643	556856	190360	2130348	3560	487	74	328054	417	721320	599	1248286	6338	10534329	564849	1617677	77812	12841	7941	3808160	75759	906
ATB-j3-exp3-plasma_140	2	10870	71	759	3357	115755	296572	4140	13992	8424	13859	1021688	24287	4618196	5	930	3159	51752521	103577	32	1215	495	64804	42329	605617	113476	76407	4578	493072	89941	766112	35	294	256	228602	484	608528	30	741838	100	5287394	544694	895593	46244	3985	61	1485084	49013	2657
MITSUAKI-j3-exp2-plasma_151	61	15706	44	384	2301	323274	425826	1687	14001	8015	14050	1686309	43275	8921049	153	907	3714	106575215	92381	801	1705	669	75996	73949	1249736	110002	151467	5455	606326	169567	1531766	24987	264	91	348409	360	761840	321	1054417	2494	7646097	872523	2278758	47528	5107	20	2864010	87973	1799
AKKERMANSIA-j14-exp3-plasma_197	43	10298	10	244	864	164142	341138	2236	11820	7150	9543	1179931	26565	3994005	366	1242	3507	46656794	119632	403	1551	30833	68700	39751	407790	101700	98643	4496	327135	114496	723514	1453	254	320	202084	140	588617	380	730424	2010	6523313	468590	1149658	44768	7659	814	1392848	57688	2800
Nacl-j7-exp3-plasma_158	29	10384	307	3083	2165	147453	438257	3162	5807	7316	12623	1420243	36062	4100103	140	1298	3820	49476207	167132	70	1411	17841	61826	45898	323175	121267	122029	4376	551554	171350	655156	324	222	154	228882	294	648010	186	799414	423	5472974	425828	1391202	47076	5864	2116	1280164	77663	2088
ATB-j7-exp2-plasma_163	2	15308	47	462	2073	163160	439270	1917	9270	7276	15547	1600983	31661	6914010	5	1115	3245	120929825	74687	24	1667	618	217415	91775	1753237	128085	109787	4875	612892	114779	1906378	79	671	69	394427	611	753452	19	1181403	43	7007091	959165	2047435	40797	4797	27	3370324	60500	2765
FECES-j3-exp3-plasma_146	6	10934	116	1361	2623	195127	482520	4369	19886	7309	12523	1050031	31382	4664870	5	1264	3811	54427592	125489	298	1140	743	65128	46859	645077	88901	87079	4198	494191	89480	604371	6115	504	266	242219	506	616076	152	741403	151	9012437	600475	960397	38797	6717	39	1174635	89065	2876
BURKO-j14-exp2-plasma_187	20	12811	78	585	1570	156164	275080	2154	5113	10674	10188	1545416	51737	8937580	223	913	3573	78007221	95647	85	1334	2335	90883	77391	1117241	115354	119483	5081	564559	179393	5166990	2982	268	56	362188	340	813278	202	1066356	1541	5337311	690753	1624074	33027	10786	26	8812741	71296	2278
AKKERMANSIA-j3-exp3-plasma_152	4	12548	109	6362	4948	238483	482783	3874	26402	7520	13016	1278393	38641	4515774	71	1551	4017	52253357	155302	200	1330	501	55212	52400	687198	112941	76198	4436	503442	97214	946225	5687	531	259	268605	599	694144	108	724346	120	8590653	637602	1151499	71650	11002	15	1834719	78947	3340
Nacl-j3-exp2-plasma_138	271	14009	46	1019	2651	254018	455692	2137	7722	6637	8759	1373549	59840	8155399	552	1123	4063	109709274	152280	1542	1499	33249	64895	71220	671433	122258	160486	4761	563363	232841	2041177	6973	582	71	322844	354	742913	706	1199039	7283	8381701	650294	2720781	77265	14817	4181	3797305	73417	2748
ATB-j7-exp3-plasma_164	2	11325	46	710	1942	123028	336745	4308	7607	7252	14082	1681287	28748	4792159	5	1011	2916	68023324	98380	77	1423	706	61316	72055	843418	131822	109050	5040	559636	100124	573065	268	378	211	243694	369	633011	62	796744	33	5664645	832140	1234577	50486	3766	39	1062925	62538	5882
ATB-j14-exp2-plasma_186	7	12489	53	502	2917	241196	831333	2112	30667	11135	4217	1226146	43041	6142797	2	836	3553	87061027	103638	33	1220	621	84106	72611	610417	123480	107858	2948	515671	123599	5171123	96	251	66	353038	301	820049	25	1043530	15	12387942	638572	1502084	60022	5347	31	8834301	58869	3050
Nacl-j3-exp3-plasma_136	76	12066	207	3069	4608	196742	635315	5114	23335	8214	10498	1251138	54555	4768598	515	1620	5481	58631260	217577	169	1122	14162	60934	56701	520827	124904	117290	5467	520599	267830	1185500	1263	363	222	220186	409	673243	206	786488	807	8147740	451745	1855603	41357	6917	2079	2210127	65724	1753
MITSUAKI-j14-exp2-plasma_193	7	14700	77	608	1427	139735	322433	1932	7704	10384	7121	1056390	45928	5788637	166	792	2723	83352653	134183	358	1469	9949	200948	97004	393854	110659	84593	3832	433380	116620	1340049	1039	288	71	317330	339	745724	442	1213558	1033	6490542	567211	1848549	41292	5724	2310	2477550	54066	1179
AKKERMANSIA-j14-exp3-plasma_193	26	10806	57	1242	1915	123912	203356	4913	6550	7809	10181	1126539	36067	4190739	682	1086	2760	51112564	143401	561	1200	15287	84873	45083	304297	93159	70906	4136	342704	159543	661022	2674	424	250	185013	315	562238	343	769006	1128	4988978	579133	1431627	53943	8721	2129	1262579	50727	4146
MITSUAKI-j3-exp2-plasma_155	9	16627	55	525	1770	315269	639818	1669	11201	7464	10716	1817390	45519	8769018	2	1179	5231	125475838	91051	124	1401	834	67074	82364	902837	123923	181863	4796	614371	177847	2639790	2267	424	76	370053	430	831760	46	1178093	573	10000462	697411	2917050	27504	5647	42	4598062	87042	1893
BURKO-j14-exp2-plasma_192	53	16906	7	42	163	249370	465586	511	1687	10245	7098	1121122	44723	8055924	129	151	4689	95525021	136428	110	1607	1981	87816	86708	531322	155915	144083	3966	445039	138893	2000065	2282	41	81	403661	46	766085	139	1079545	2131	10550079	683244	2320368	62684	10428	54	3532120	86105	1227
ATB-j3-exp3-plasma_143	6	10371	82	1269	3413	145154	425001	6021	24710	8001	15235	1243043	24769	3704029	5	626	2744	45241150	89292	6	961	544	63617	48787	738072	123963	66745	4207	456700	84866	686948	5	172	221	223832	267	585092	19	762829	32	6356303	562060	1011141	48845	3516	27	1320785	57893	3033
MITSUAKI-j7-exp2-plasma_180	130	14629	70	521	3008	342989	576028	1471	23363	9171	8026	949340	47604	9322418	19	1143	3862	98579785	120408	639	1301	2391	70182	74910	548372	102436	150148	4189	540309	169522	1790174	7121	445	75	369613	547	754254	176	1072655	5821	11649914	709443	1563498	36974	6841	13018	3263389	77401	948
FECES-j7-exp3-plasma_173	24	11992	54	741	3080	308234	244501	4500	36030	6522	9342	1155915	33582	4943771	369	1611	3284	59694867	143504	240	1197	6085	69258	39922	582952	147580	93926	5057	370630	152382	719202	12892	293	296	209560	414	605662	473	790952	469	7178827	532947	1341054	54723	4378	41	1368701	101766	2099
BURKO-j7-exp2-plasma_173	8	15956	38	972	1913	209088	302887	1547	5455	10553	8111	1557103	63952	8811541	2	1163	4080	124585000	146171	255	1840	22680	90491	85609	699706	139283	167704	4444	653672	278844	1722865	593	354	70	333448	339	802163	35	1186901	252	6569248	793883	2466698	43483	12098	1336	3052243	83581	1902
AKKERMANSIA-j7-exp3-plasma_178	6	11592	55	696	1566	174583	262139	3839	6696	7684	8635	1517476	32305	4736000	15	1746	3382	68417476	132719	146	1117	16531	80190	58235	438171	140331	88686	5047	373660	118753	872316	2706	378	225	217016	484	619238	153	771519	161	6642737	656995	1525307	49215	5588	39	1641555	64593	4186
Nacl-j7-exp2-plasma_162	100	14168	51	1068	3178	337026	883044	1330	21496	8549	9003	875286	54815	7050214	484	1350	4592	88241728	145248	955	1563	20589	61477	73139	742903	84236	107770	5458	547075	163826	1944319	3224	581	69	401958	453	792384	695	1249335	4346	11293008	578636	2250939	53285	12227	8955	3501715	93467	1351
ATB-j14-exp3-plasma_185	4	13477	22	514	1605	118799	481476	3876	9450	7803	6085	1443111	25745	5268775	5	1002	2248	70946251	74862	34	814	434	53364	61249	267549	257018	131281	3964	308707	166284	557757	256	346	270	201864	622	598071	40	675590	73	3753762	660746	960903	9563	3995	41	1058535	47243	3470
MITSUAKI-j7-exp2-plasma_175	161	18193	80	538	3052	370928	550616	1849	6862	9835	10644	1564005	83524	11711539	1089	1355	5522	132797145	200294	1789	1559	5980	78941	101729	731196	187720	188731	6655	613802	360675	1696265	10995	412	95	379088	428	794055	183	1170444	6251	10827364	1241005	2790697	71910	7983	10355	3135066	106845	3834
Nacl-j7-exp3-plasma_160	90	10541	263	2935	2267	195992	549758	3882	11574	7514	13537	1513575	39345	4825066	261	1646	5170	52269687	141206	114	1901	11572	69962	70576	578360	94708	163939	4726	519348	272932	540606	547	407	218	231174	387	604999	178	864183	1149	8192525	367616	1078027	42409	8179	4422	1051372	90579	1481
FECES-j14-exp3-plasma_190	156	12938	66	1835	2144	240490	410359	5128	7050	10658	15829	1454491	34328	5473137	332	1312	4855	69636749	118560	1152	1292	30599	57452	58548	644357	90385	155580	4699	315874	196932	689146	7179	503	298	191963	497	564490	733	759312	3208	6311662	414314	1699821	45600	8685	4369	1272981	75255	3928
BURKO-j3-exp2-plasma_149	16	19357	61	1416	2779	343171	890215	999	12473	8445	9209	1519894	45502	9962669	5	1814	4675	103840951	102582	373	1540	12419	62683	96154	540657	112639	137294	4002	722085	148068	1975181	4342	619	90	392369	647	808083	59	1245708	1695	13562102	878550	2215076	58131	10578	3164	3637813	130747	1486
ATB-j7-exp3-plasma_167	45	10674	50	668	1836	116694	327783	4249	7505	9120	13268	1120182	21247	4173700	4	748	2385	56415217	70122	238	1252	446	58740	56720	566713	111281	56562	4240	479924	67680	624408	1994	208	257	238858	286	670162	73	756081	7066	4812974	537965	1241046	43812	3211	122	1184519	51133	2737
MITSUAKI-j14-exp2-plasma_198	17	18128	71	949	1701	244070	366011	1452	6412	7867	6648	1092972	64401	5925056	117	866	4050	84299188	175777	295	1216	17299	245026	132522	593191	110196	128742	5693	519657	218000	3426070	1629	358	51	356912	471	887706	286	1114781	1556	7498479	696379	1870418	52302	9543	2618	5950905	68085	2959
AKKERMANSIA-j3-exp3-plasma_151	4	13598	45	4829	2356	170830	381155	3566	13848	9196	11344	1406203	30740	5424589	10	855	2869	50016553	123455	170	1442	440	55150	51518	458547	113117	61757	4112	571471	84196	1172919	2721	219	224	246584	317	690857	105	762780	77	6334457	601219	1116268	71048	11369	49	2196403	59065	3180
FECES-j7-exp3-plasma_170	13	11499	25	686	774	286886	357454	2476	7749	7819	8872	1070418	30388	5124361	141	1207	3389	62962493	127963	274	1460	5669	70111	44425	559471	132141	89219	5058	326600	112190	441031	4712	252	184	205837	200	587841	517	764541	297	6782843	600609	1643559	44928	4990	28	827452	125974	4189
Nacl-j3-exp3-plasma_138	178	12384	88	1029	3691	237724	394249	3832	48213	7352	10528	963278	51862	5079083	607	1401	5319	47357491	254307	783	1448	22062	54678	51804	567631	132331	109583	4175	430822	182715	676087	3802	435	215	221485	390	625865	583	775801	3358	9045127	513352	1413389	82909	10306	4664	1333272	62701	895
AKKERMANSIA-j14-exp3-plasma_196	77	11880	124	1705	2725	151550	172257	3526	12111	6506	8981	1139494	38131	5345553	546	1544	4191	59200813	173238	1001	1276	22017	106763	43261	418878	162218	144785	3868	365001	187369	531534	3578	425	258	198889	388	574093	429	749195	2230	5793642	570015	1491256	44930	10208	4095	985453	53220	2964
FECES-j3-exp3-plasma_149	5	11739	66	884	2397	197720	507864	5886	30906	8120	10895	1248852	26477	4244202	7	1322	3692	50705580	95782	208	1632	774	61120	56039	633289	111850	100025	4190	518041	109317	887799	4167	354	226	281252	375	710850	121	753249	128	8191373	497837	1213547	47281	6859	38	1662413	62952	2683
ATB-j3-exp3-plasma_139	5	10419	64	722	5947	136111	369280	4610	31762	8690	16640	835016	23268	5010641	2	1172	2486	55821326	87290	21	1492	440	57603	47289	938634	90441	78286	4728	460052	87611	777181	41	729	215	261506	713	634947	28	762448	83	6206257	613803	1297733	57234	4052	49	1454799	40856	2824
FECES-j14-exp3-plasma_192	189	12986	93	1253	2748	167267	337109	4558	58503	9717	9984	628326	35114	5038766	491	1725	3076	44983447	167179	1258	1110	19970	36662	30374	604743	119275	76534	5016	304240	130167	680637	5832	382	243	219219	360	590901	396	729325	4535	6988646	571080	1026380	48429	6347	5064	1287959	45563	584
AKKERMANSIA-j7-exp3-plasma_176	6	13652	55	720	1093	145058	194934	2968	3608	8635	8111	1608054	34111	5794592	113	1182	2884	72110446	142800	176	1282	10789	148162	51832	370155	156997	69778	4280	371675	98052	922798	2784	207	302	181629	329	554738	247	745791	117	5747951	779120	1249467	86367	8525	65	1753611	56561	4001
Nacl-j3-exp3-plasma_134	150	12332	35	704	2151	155553	187927	3700	9930	7619	12424	1557575	35345	5321987	1043	1493	3430	72590145	136128	1077	1206	27233	132939	49533	452234	184613	124386	4645	579025	202940	920973	4411	374	199	234049	392	747443	663	771177	4594	5888789	699248	1254046	58196	6444	6386	1746782	52712	4970
ATB-j14-exp3-plasma_184	5	11827	26	729	1484	119280	311752	3680	3730	9580	7844	1811872	24249	4506322	4	841	2447	63140680	100060	26	1480	1364	64846	64846	436267	132859	88395	4451	326115	107194	675201	48	240	245	205375	390	615340	14	787570	102	4877672	792944	1239735	38018	4364	30	1340143	57755	4517
AKKERMANSIA-j3-exp3-plasma_155	6	12159	35	3478	3848	431593	561473	4021	30535	8022	12738	1486706	24141	4710389	170	1448	3941	56745125	89492	321	1134	764	56289	51568	675549	108640	103056	4344	604282	125251	828857	9579	441	180	246368	493	655843	437	755213	136	9716804	641377	866665	77009	11199	55	1587788	65007	4693
FECES-j7-exp3-plasma_171	32	11559	51	691	2877	293987	274240	3095	31213	7915	10179	970037	22785	4868578	388	1575	3818	52897371	73158	283	1502	7378	95000	52469	618327	95572	105835	5023	332359	104432	726330	8087	321	221	211219	374	617355	582	788686	967	7179481	436070	1012478	52215	4003	54	1412593	113121	2481
ATB-j7-exp3-plasma_166	7	10766	36	557	1575	123978	311066	2599	9647	7521	12381	1348115	22627	4716244	6	902	2650	61772897	82259	26	1459	485	56931	56381	550585	150233	101260	4236	525727	83655	615225	60	264	151	241010	322	654407	18	770395	91	4997187	709714	1257060	45717	3663	49	1152663	52672	4522
AKKERMANSIA-j14-exp3-plasma_194	43	8531	55	1214	2094	215742	273200	2273	5190	8482	8784	1207874	32262	4437239	1863	1497	3184	58725005	132116	835	1269	43489	51393	57234	333957	103340	87102	5086	346456	130615	737338	10588	383	255	209206	380	639289	560	809591	3288	6008529	492645	1288687	38380	12675	154	1438105	77897	3207
ATB-j3-exp2-plasma_139	7	11754	NA	NA	NA	107735	232337	NA	NA	8054	9377	1273629	35572	5603125	4	NA	2542	96613664	74382	29	1414	407	62093	72430	1079218	93386	88276	3567	489073	99989	1636562	64	NA	48	388443	NA	705957	37	1143858	74	5078326	609099	1935867	32365	4171	26	2896740	51159	1647
Nacl-j7-exp3-plasma_157	265	11849	306	2747	1784	148879	363600	3191	7935	7172	15315	1599986	39435	4756445	764	1411	4497	48290424	137488	697	1410	24549	85163	56410	421219	96436	141129	5294	613359	234234	770276	2339	307	168	241669	356	667637	421	835348	3336	6149245	449409	1198899	50394	6660	2883	1502616	77982	1874
FECES-j3-exp3-plasma_147	3	9719	80	771	2559	211485	534533	3280	32784	8976	13899	935705	28786	3941788	135	1333	4293	50533869	97234	433	1277	781	68686	63091	726443	95932	84425	5934	466048	97014	760450	10908	440	200	256578	497	672698	218	768906	233	7952047	510438	1020828	43133	8261	39	1426129	69290	2686
AKKERMANSIA-j7-exp3-plasma_177	2	13176	80	940	1367	172741	196658	2755	6786	8573	9236	1818641	37448	5565854	232	1223	3372	73979969	143993	146	1470	17064	69780	59025	536535	173564	108339	6367	342493	165178	1496647	5600	351	145	240900	436	645065	321	833093	235	5943215	692500	1529250	56931	6748	31	2919881	57209	3299
ATB-j3-exp3-plasma_142	6	9181	37	608	2334	118219	276086	3401	16737	7655	12891	1385135	23264	4489949	3	1265	2751	49080332	78257	31	1133	595	58332	69842	715990	112810	110820	4892	491704	117377	763859	107	376	188	241688	556	660454	26	788482	68	5149655	587842	1069039	43062	4086	48	1411707	53110	2824
AKKERMANSIA-j14-exp3-plasma_198	31	11606	5	145	181	181682	368719	1056	7543	8390	10030	898741	8443	5044311	523	817	3235	40110496	9038	853	1370	25820	90356	48124	378318	78716	78713	6531	348295	74963	938695	3703	277	253	278799	152	687623	426	810466	1436	6992807	298481	1183576	54856	15253	1754	1784925	84039	2353
FECES-j7-exp3-plasma_174	7	10965	68	1041	2238	379545	458123	2144	23446	9193	8763	1105309	22886	4587685	7	2205	2951	48777348	97237	179	1216	7312	90195	48494	427240	124998	70205	4964	331007	90289	716755	3211	468	213	215997	496	618488	245	769891	197	8074114	499665	1232424	47232	4671	34	1377140	92990	2789
ATB-j14-exp3-plasma_183	3	12487	12	256	639	139296	370691	705	3691	9330	11333	1642491	22385	4822148	1	179	3140	60002760	63313	26	1290	536	71884	75131	610519	120720	125455	5086	395638	108991	939969	97	59	155	223769	333	676038	32	805246	102	6686803	798707	1022786	56388	4749	20	1778048	47734	4310
Nacl-j7-exp3-plasma_162	605	12975	70	994	4652	321790	593627	1454	32655	9026	11097	1030446	58284	6151210	2813	2728	3389	40882255	272512	1805	1456	27556	51935	46025	471005	114770	108681	5141	635622	377968	735369	10174	539	153	274292	429	743683	1829	795817	7407	8656796	666806	1204171	113288	10170	7331	1429882	81554	2118
AKKERMANSIA-j3-exp3-plasma_153	6	12386	61	4296	3406	224318	621347	1913	42345	7397	12568	894880	32700	5339987	9	1724	2964	41713948	136163	224	1358	823	72430	50811	689792	123523	94024	4290	610618	100365	1373160	3990	394	155	281765	536	670165	89	752094	163	9450430	676234	916972	51838	10576	30	2660489	70108	3167
ATB-j7-exp3-plasma_163	3	10514	76	818	2329	114526	299286	2959	18567	7019	11006	953961	22514	3947489	5	857	2558	53333173	90109	36	1119	608	61638	47462	525870	127766	65816	5151	563869	76046	1077880	40	303	103	269147	477	717981	26	748581	105	5469211	615303	909882	56019	3110	27	1988693	44731	3722
FECES-j14-exp3-plasma_187	175	13443	84	814	2004	130553	197137	2505	44145	10621	9300	1056408	33805	5504500	1224	1478	2192	38797194	136672	1026	1354	16411	44494	38485	561021	159075	90203	4640	312467	194525	844074	4632	255	167	224702	386	606540	464	793990	4034	4504979	604367	1430046	72146	6879	4012	1584860	37931	1763
Nacl-j3-exp3-plasma_133	61	13447	91	916	1818	144229	212628	2166	23348	8873	13471	1172915	44504	5883505	337	1226	3504	44342590	203633	656	1760	27150	63343	47258	580181	138908	117572	5576	537548	173092	889756	2323	398	168	239036	445	740166	215	825510	1307	7259227	673784	1515855	61169	9949	3791	1717758	49758	1506
ATB-j14-exp2-plasma_181	17	17480	NA	NA	NA	146914	358695	NA	NA	8898	6011	1231559	35150	8849067	3	NA	4007	124076846	73960	62	1551	503	54954	81935	621769	305158	162103	3368	562524	230983	1915302	392	NA	81	337345	NA	745300	31	1104782	49	5713062	826431	925197	15755	6187	33	3507387	49410	1229
ATB-j14-exp3-plasma_186	10	11537	68	800	1837	117798	388020	2679	22191	7365	10083	1266351	20692	4888255	5	1163	2969	56973694	64361	21	1064	701	57655	59108	500951	119791	98168	4377	360556	86579	596626	23	458	192	227311	487	628990	8	837737	107	6403318	574176	973722	32854	3925	33	1102636	46414	2509
AKKERMANSIA-j7-exp3-plasma_179	5	10088	85	796	1487	188170	325515	2295	16363	9029	9853	1118968	34185	4784620	395	1479	3310	52320357	107824	264	1206	14542	75979	59157	529080	91391	71699	4997	364594	101266	1182736	7373	424	226	225538	396	608070	422	762149	232	7302012	666922	1274291	41440	5308	46	2223244	58077	2330
FECES-j3-exp3-plasma_145	7	11620	57	601	2780	156203	350436	2299	13646	10347	12842	1234554	30090	4684181	6	1078	2550	54304656	80011	190	1217	529	42569	51972	583140	120285	60484	5115	488840	77891	1850616	2854	392	187	235648	453	661417	111	824672	121	6023896	552456	763909	48325	6035	28	3370786	49818	4465
ATB-j7-exp3-plasma_168	1	10548	35	627	2539	135522	378612	2227	19385	7864	13912	1135912	21281	4238130	5	1020	3349	48885493	69108	58	1213	603	51853	47136	891397	120567	85430	5495	524552	86719	803229	111	398	196	266125	500	690998	15	827615	32	5861285	665062	867353	49354	4293	19	1512361	47968	3405
Nacl-j7-exp3-plasma_161	361	12721	329	3289	2405	182955	557857	1569	20814	8057	13037	1422902	51619	4967636	601	1640	4190	36014888	225397	370	1448	7484	52847	37356	401920	115088	108313	5238	548158	195909	625376	1245	459	131	258600	449	668745	404	840795	2982	7408519	437006	1744191	61402	8803	4671	1164020	88193	1148
FECES-j14-exp3-plasma_188	16	13115	76	1613	1594	150590	245907	1543	7869	7546	11410	1345263	37795	5745368	319	1456	3429	62016664	151823	352	1263	26580	51316	53211	595224	160063	122260	5437	375560	188235	781161	2703	335	154	220729	384	646977	307	791989	962	5650983	744864	1272025	45502	9957	1827	1424074	78594	2492
ATB-j3-exp3-plasma_144	5	13322	55	700	1808	184218	472417	1808	9995	8292	15539	1711082	26311	5845772	5	1246	4980	75024039	82684	13	1287	783	70670	67371	816067	170223	131637	7547	551557	129978	1053241	57	546	171	290200	696	705392	13	824952	57	7340006	835353	1298500	48226	4945	52	2040860	72069	4592
AKKERMANSIA-j3-exp3-plasma_156	38	11435	50	4712	2458	255352	576042	1542	19580	6729	12675	1096319	29105	5762415	66	1323	4052	51770548	100328	419	1189	792	61773	59306	488764	140325	109666	4182	609728	108573	978768	3898	311	148	257231	324	725327	111	818434	500	9042198	606956	706271	47710	8558	379	1854300	81641	3820
FECES-j3-exp3-plasma_150	2	12193	102	787	2384	217608	588917	1263	27928	7142	12573	678842	27008	4725114	28	1364	3857	36743234	104744	144	1347	756	61419	50941	599141	87893	88116	4453	567763	96851	876086	3040	425	170	263149	488	682487	114	807482	137	9429128	450780	934578	36140	6685	36	1614631	61954	1969
ATB-j14-exp3-plasma_181	10	15185	54	590	1369	127392	286842	1655	5342	6875	10396	2152440	29179	6939204	3	875	2979	99778573	93613	34	1624	779	61174	64743	549141	206101	130071	5232	372805	134365	992674	67	481	145	232861	494	673946	24	843928	75	4697999	988016	1551959	35587	5561	46	1914447	68652	5194
AKKERMANSIA-j7-exp3-plasma_180	5	10239	60	1174	1957	182988	330001	1594	15375	8464	7742	993357	25963	3810393	182	1725	2252	44645648	103988	244	1508	6780	64272	53846	400267	74759	67432	5054	344012	88078	816280	4648	632	139	232479	612	647640	295	789234	261	6805726	462125	702232	28877	9081	61	1555650	63553	1931
FECES-j14-exp3-plasma_189	343	15570	92	1251	1980	260768	397427	1650	30517	8675	12129	1051013	55877	8909967	1225	1553	3829	30415940	98712	1691	1300	30668	51367	65743	560976	120208	135240	6432	336568	249936	1034672	7865	374	196	278442	493	701062	494	822398	4117	7042264	443368	1253384	67853	10499	4886	1824933	76720	1745
St_SCFA-exp2-plasma_pre	NA	NA	16134	16147	15919	NA	NA	3988	11429	NA	NA	NA	NA	NA	NA	2129	NA	NA	NA	NA	NA	NA	NA	NA	NA	NA	NA	NA	NA	NA	NA	NA	8072	NA	NA	18548	NA	NA	NA	NA	NA	NA	NA	NA	NA	NA	NA	NA	NA
St_PA-exp3-plasma_pre	NA	NA	NA	NA	NA	NA	NA	NA	NA	NA	NA	NA	NA	NA	NA	NA	NA	NA	NA	NA	NA	NA	NA	NA	NA	NA	NA	NA	NA	NA	NA	NA	NA	344	NA	NA	NA	NA	NA	NA	NA	NA	NA	NA	NA	NA	NA	NA	NA
St_BA1-exp1-plasma_pre	316	NA	NA	NA	NA	NA	NA	NA	NA	NA	NA	NA	NA	NA	17578	NA	NA	NA	NA	1262	NA	NA	NA	NA	NA	NA	NA	NA	NA	NA	NA	474	NA	NA	NA	NA	NA	41487	NA	26217	NA	NA	NA	NA	NA	60412	NA	NA	NA
St_AA-exp1-plasma_pre	NA	73	NA	NA	NA	1103	2509	NA	NA	4139	29	544564	1609	110333	NA	NA	836	2306617	20	NA	114	208	196	1408	1307	19	78382	2001	1141371	562104	4040051	NA	NA	NA	142258	NA	278565	NA	353	NA	14390690	29155	40476	13156	525	NA	7779106	465	93
St_BA2-exp1-plasma_pre	13961	NA	NA	NA	NA	NA	NA	NA	NA	NA	NA	NA	NA	NA	80	NA	NA	NA	NA	4264	NA	NA	NA	NA	NA	NA	NA	NA	NA	NA	NA	107036	NA	NA	NA	NA	NA	68041	NA	485	NA	NA	NA	NA	NA	7083	NA	NA	NA
St_SCFA-exp2-plasma_post	NA	NA	27847	19796	20216	NA	NA	3290	15913	NA	NA	NA	NA	NA	NA	1772	NA	NA	NA	NA	NA	NA	NA	NA	NA	NA	NA	NA	NA	NA	NA	NA	10326	NA	NA	21449	NA	NA	NA	NA	NA	NA	NA	NA	NA	NA	NA	NA	NA
St_SCFA1-exp1-plasma_pre	NA	NA	33600	31189	32736	NA	NA	4398	20429	NA	NA	NA	NA	NA	NA	3087	NA	NA	NA	NA	NA	NA	NA	NA	NA	NA	NA	NA	NA	NA	NA	NA	15919	NA	NA	31628	NA	NA	NA	NA	NA	NA	NA	NA	NA	NA	NA	NA	NA
St_PA-exp3-plasma_post	NA	NA	NA	NA	NA	NA	NA	NA	NA	NA	NA	NA	NA	NA	NA	NA	NA	NA	NA	NA	NA	NA	NA	NA	NA	NA	NA	NA	NA	NA	NA	NA	NA	233	NA	NA	NA	NA	NA	NA	NA	NA	NA	NA	NA	NA	NA	NA	NA
St_PA-exp1-plasma_pre	NA	NA	NA	NA	NA	NA	NA	NA	NA	NA	NA	NA	NA	NA	NA	NA	NA	NA	NA	NA	NA	NA	NA	NA	NA	NA	NA	NA	NA	NA	NA	NA	NA	158	NA	NA	NA	NA	NA	NA	NA	NA	NA	NA	NA	NA	NA	NA	NA
St_BA2-exp1-plasma_post	16117	NA	NA	NA	NA	NA	NA	NA	NA	NA	NA	NA	NA	NA	51	NA	NA	NA	NA	17	NA	NA	NA	NA	NA	NA	NA	NA	NA	NA	NA	106153	NA	NA	NA	NA	NA	28372	NA	458	NA	NA	NA	NA	NA	1990	NA	NA	NA
St_BA1-exp1-plasma_post	433	NA	NA	NA	NA	NA	NA	NA	NA	NA	NA	NA	NA	NA	21836	NA	NA	NA	NA	2005	NA	NA	NA	NA	NA	NA	NA	NA	NA	NA	NA	656	NA	NA	NA	NA	NA	45535	NA	31834	NA	NA	NA	NA	NA	68183	NA	NA	NA
St_BA1-exp2-plasma_pre	448	NA	NA	NA	NA	NA	NA	NA	NA	NA	NA	NA	NA	NA	19643	NA	NA	NA	NA	NA	NA	NA	NA	NA	NA	NA	NA	NA	NA	NA	NA	449	NA	NA	NA	NA	NA	36828	NA	29451	NA	NA	NA	NA	NA	55249	NA	NA	NA
St_BA2-exp2-plasma_pre	13807	NA	NA	NA	NA	NA	NA	NA	NA	NA	NA	NA	NA	NA	13	NA	NA	NA	NA	NA	NA	NA	NA	NA	NA	NA	NA	NA	NA	NA	NA	92802	NA	NA	NA	NA	NA	19890	NA	378	NA	NA	NA	NA	NA	1371	NA	NA	NA
St_AA-exp1-plasma_post	NA	173	NA	NA	NA	1680	8775	NA	NA	6489	31	1072111	2591	114792	NA	NA	445	3610833	78	NA	51	726	413	2455	3481	119	170482	1146	688319	1815525	7316201	NA	NA	NA	274066	NA	505320	NA	815	NA	25501759	161087	53738	51463	384	NA	13522904	1387	122
St_AA_exp2-plasma_pre	NA	32	NA	NA	NA	1391	2737	NA	NA	5422	8	733540	1015	203526	NA	NA	366	3067817	13	NA	42	642	108	417	873	63	99404	6087	1086371	754835	3753086	NA	NA	NA	219823	NA	304982	NA	76	NA	17587639	39462	58004	16192	591	NA	7122207	560	66
St_SCFA1-exp1-plasma_post	NA	NA	47166	36158	34855	NA	NA	4060	21880	NA	NA	NA	NA	NA	NA	3000	NA	NA	NA	NA	NA	NA	NA	NA	NA	NA	NA	NA	NA	NA	NA	NA	17383	NA	NA	33615	NA	NA	NA	NA	NA	NA	NA	NA	NA	NA	NA	NA	NA
St_SCFA-exp3-plasma_pre	NA	NA	35451	33956	34127	NA	NA	5512	20565	NA	NA	NA	NA	NA	NA	3551	NA	NA	NA	NA	NA	NA	NA	NA	NA	NA	NA	NA	NA	NA	NA	NA	14767	NA	NA	31929	NA	NA	NA	NA	NA	NA	NA	NA	NA	NA	NA	NA	NA
St_PA-exp1-plasma_post	NA	NA	NA	NA	NA	NA	NA	NA	NA	NA	NA	NA	NA	NA	NA	NA	NA	NA	NA	NA	NA	NA	NA	NA	NA	NA	NA	NA	NA	NA	NA	NA	NA	154	NA	NA	NA	NA	NA	NA	NA	NA	NA	NA	NA	NA	NA	NA	NA
St_PA-exp2-plasma_pre	NA	NA	NA	NA	NA	NA	NA	NA	NA	NA	NA	NA	NA	NA	NA	NA	NA	NA	NA	NA	NA	NA	NA	NA	NA	NA	NA	NA	NA	NA	NA	NA	NA	106	NA	NA	NA	NA	NA	NA	NA	NA	NA	NA	NA	NA	NA	NA	NA
St_BA2-exp2-plasma_post	13271	NA	NA	NA	NA	NA	NA	NA	NA	NA	NA	NA	NA	NA	79	NA	NA	NA	NA	16	NA	NA	NA	NA	NA	NA	NA	NA	NA	NA	NA	87528	NA	NA	NA	NA	NA	14145	NA	323	NA	NA	NA	NA	NA	956	NA	NA	NA
St_AA_exp2-plasma_post	NA	148	NA	NA	NA	719	8817	NA	NA	8685	100	1194441	2688	133525	NA	NA	509	4275255	154	NA	22	216	336	964	3853	118	182471	2400	442636	2125402	6387437	NA	NA	NA	286627	NA	503102	NA	2306	NA	26888213	165878	73948	46125	436	NA	10920749	1787	37
St_BA1-exp2-plasma_post	351	NA	NA	NA	NA	NA	NA	NA	NA	NA	NA	NA	NA	NA	20960	NA	NA	NA	NA	1174	NA	NA	NA	NA	NA	NA	NA	NA	NA	NA	NA	NA	NA	NA	NA	NA	NA	30675	NA	28869	NA	NA	NA	NA	NA	49407	NA	NA	NA
St_AA_exp3-plasma_pre	NA	59	NA	NA	NA	1943	3622	NA	NA	4235	71	719799	1400	197626	NA	NA	493	1977768	22	NA	31	418	123	410	1109	59	100866	2795	437488	1085370	2975588	NA	NA	NA	126483	NA	290118	NA	1808	NA	12542917	69047	43566	11530	1015	NA	6006903	136	38
St_BA1-exp3-plasma_pre	349	NA	NA	NA	NA	NA	NA	NA	NA	NA	NA	NA	NA	NA	17613	NA	NA	NA	NA	6013	NA	NA	NA	NA	NA	NA	NA	NA	NA	NA	NA	NA	NA	NA	NA	NA	NA	48580	NA	31290	NA	NA	NA	NA	NA	72483	NA	NA	NA
St_BA2-exp3-plasma_pre	13278	NA	NA	NA	NA	NA	NA	NA	NA	NA	NA	NA	NA	NA	12	NA	NA	NA	NA	NA	NA	NA	NA	NA	NA	NA	NA	NA	NA	NA	NA	99563	NA	NA	NA	NA	NA	69937	NA	537	NA	NA	NA	NA	NA	3910	NA	NA	NA
St_SCFA_exp3-plasma_post	NA	NA	31260	25727	23370	NA	NA	4395	19156	NA	NA	NA	NA	NA	NA	2799	NA	NA	NA	NA	NA	NA	NA	NA	NA	NA	NA	NA	NA	NA	NA	NA	13146	NA	NA	28864	NA	NA	NA	NA	NA	NA	NA	NA	NA	NA	NA	NA	NA
St_PA-exp2-plasma_post	NA	NA	NA	NA	NA	NA	NA	NA	NA	NA	NA	NA	NA	NA	NA	NA	NA	NA	NA	NA	NA	NA	NA	NA	NA	NA	NA	NA	NA	NA	NA	NA	NA	99	NA	NA	NA	NA	NA	NA	NA	NA	NA	NA	NA	NA	NA	NA	NA
St_AA_exp3-plasma_post	NA	72	NA	NA	NA	2593	8157	NA	NA	5788	147	1087552	2284	95572	NA	NA	596	2727610	24	NA	56	312	204	367	2973	116	173171	3394	266932	1738373	3943352	NA	NA	NA	176509	NA	436921	NA	3454	NA	18467626	154522	50975	30930	220	NA	7961364	1577	194
St_BA2-exp3-plasma_post	15330	NA	NA	NA	NA	NA	NA	NA	NA	NA	NA	NA	NA	NA	12	NA	NA	NA	NA	NA	NA	NA	NA	NA	NA	NA	NA	NA	NA	NA	NA	106618	NA	NA	NA	NA	NA	33326	NA	513	NA	NA	NA	NA	NA	2240	NA	NA	NA
St_BA1-exp3-plasma_post	361	NA	NA	NA	NA	NA	NA	NA	NA	NA	NA	NA	NA	NA	23237	NA	NA	NA	NA	1152	NA	NA	NA	NA	NA	NA	NA	NA	NA	NA	NA	NA	NA	NA	NA	NA	NA	38969	NA	36186	NA	NA	NA	NA	NA	63828	NA	NA	NA
[truncated: 107 more columns]

## Sheet: AreaQCCorr
Sid	12-dehydrocholic acid@5.34-ba	2-aminoadipic acid@15.25-gc	2-hydroxy-2-methylbutyric acid@3.43-sf	2-hydroxy-3-methylbutyric acid@4.53-sf	2-hydroxybutyric acid@2.47-sf	2-hydroxyglutaric acid@13.02-gc	2-oxoglutaric acid@13.03-gc	2-oxovaleric acid@14.60-sf	3-hydroxybutyric acid@1.66-sf	3-hydroxyisovaleric acid@7.83-gc	4-hydroxymandelic acid@15.24-gc	4-hydroxyproline@12.45-gc	5-aminovaleric acid@13.54-gc	5-oxoproline@12.36-gc	7,12-dihydroxy-3-oxocholanoic acid@6.49-ba	Acetic acid@1.78-sf	Adenine@16.20-gc	Alanine@6.92-gc	Allantoin@16.56-gc	Alpha-muricholic acid@5.94-ba	Alpha-tocopherol@29.53-gc	Anthranilic acid@13.44-gc	Arabinose@14.19-gc	Arabitol@14.83-gc	Arachidonic acid@23.77-gc	Asparagine@14.14-gc	Aspartic acid@12.38-gc	Behenic acid@26.42-gc	Benzoic acid@8.77-gc	Beta-alanine@11.17-gc	Beta-hydroxypyruvic acid@5.46-gc	Beta-muricholic acid@6.22-ba	Butanoic acid@5.21-sf	Cadaverine@4.64-pa	Capric acid@11.46-gc	Caproic acid@12.05-sf	Caprylic acid@8.96-gc	Chenodeoxycholic acid@10.31-ba	Cholesterol@29.53-gc	Cholic acid@9.11-ba	Citric acid;Isocitric acid@15.82-gc	Citrulline@15.79-gc	Creatine@12.81-gc	Cystine;Cysteine@23.03-gc	Cytosine@12.38-gc	Deoxycholic acid@10.53-ba	Dimethylglycine@5.46-gc	Erythritol@12.31-gc	Ferulic acid@19.23-gc
BlM-exp2-plasma_pre	NA	NA	118.958	29.204	97.724	NA	NA	10660.806	14.83	NA	NA	NA	NA	NA	NA	4802.708	NA	NA	NA	NA	NA	NA	NA	NA	NA	NA	NA	NA	NA	NA	NA	NA	1341.249	NA	NA	2216.608	NA	NA	NA	NA	NA	NA	NA	NA	NA	NA	NA	NA	NA
BlM_exp1-plasma_pre	10.236	13.875	NA	NA	NA	1407.186	75.68	NA	NA	4442.175	50.863	9002.776	683.799	134868.549	557.561	NA	903.776	269195.054	30.864	131.827	15.917	495.61	86.491	11.147	2027.434	523.99	4123.783	2026.242	1211926.044	5879.39	4173486.7	21.451	NA	1356.899	327117.14	NA	651366.352	642.992	529.123	43.138	72844.462	145.16	371.821	193.307	823.497	445.878	7604381.424	208.153	7.156
BlM-exp2-plasma_post	NA	NA	7.737	1.432	16.122	NA	NA	4981.222	316.009	NA	NA	NA	NA	NA	NA	3829.745	NA	NA	NA	NA	NA	NA	NA	NA	NA	NA	NA	NA	NA	NA	NA	NA	762.41	NA	NA	1496.694	NA	NA	NA	NA	NA	NA	NA	NA	NA	NA	NA	NA	NA
BlM-exp1-plasma_pre	NA	NA	73.721	101.881	129.087	NA	NA	10053.113	284.015	NA	NA	NA	NA	NA	NA	4813.259	NA	NA	NA	NA	NA	NA	NA	NA	NA	NA	NA	NA	NA	NA	NA	NA	1329.761	NA	NA	1581.29	NA	NA	NA	NA	NA	NA	NA	NA	NA	NA	NA	NA	NA
BlM_exp3-plasma_pre	19.01	45.642	NA	NA	NA	2800.905	314.536	NA	NA	3085.998	34.561	1177.561	529.123	262222.938	75.203	NA	508.503	391396.649	13.366	67.255	9.573	151.576	217.503	30.201	1960.101	2237.189	8331.722	3202.552	1106457.887	1922.421	2172465.3	73.141	NA	1778.786	357149.262	NA	782425.298	349.391	2697.226	85.963	90038.417	2759.096	977.188	198.073	457.527	140.224	4104166.07	1318.407	33.446
BlM_exp1-plasma_post	23.278	59.153	NA	NA	NA	4049.376	639.122	NA	NA	4275.046	171.539	2156.708	464.409	65803.159	1306.053	NA	697.132	485695.834	42.511	113.348	25.499	610.029	388.714	477.684	21482.331	1772.084	3644.897	1449.42	1082028.083	9711.931	4545950.299	100.518	NA	645.799	398935.597	NA	768226.961	179.998	1150.237	101.563	17969.042	941.845	1130.111	1535.253	446.57	225.808	8538335.781	312.399	23.88
BlM_exp2-plasma_pre	19.963	71.209	NA	NA	NA	1962.258	34.803	NA	NA	4858.524	69.948	1404.75	957.045	219413.182	61.107	NA	343.16	227894.779	28.497	80.386	6.87	399.934	453.831	131.534	1109.76	1217.104	3072.288	4789.809	2713515.142	9718.98	3711655.122	51.702	NA	973.853	424552.991	NA	889216.757	32.324	877.054	53.728	102529.592	584.611	452.919	270.919	735.815	121.983	6597773.866	957.627	48.219
BlM-exp1-plasma_post	NA	NA	6.865	3.09	18.628	NA	NA	5579.247	175.94	NA	NA	NA	NA	NA	NA	4337.351	NA	NA	NA	NA	NA	NA	NA	NA	NA	NA	NA	NA	NA	NA	NA	NA	1193.194	NA	NA	1122.657	NA	NA	NA	NA	NA	NA	NA	NA	NA	NA	NA	NA	NA
BlM-exp3-plasma_pre	NA	NA	139.577	156.348	177.492	NA	NA	8270.741	256.365	NA	NA	NA	NA	NA	NA	4436.195	NA	NA	NA	NA	NA	NA	NA	NA	NA	NA	NA	NA	NA	NA	NA	NA	903.688	NA	NA	1437.451	NA	NA	NA	NA	NA	NA	NA	NA	NA	NA	NA	NA	NA
BlM_exp3-plasma_post	27.817	33.985	NA	NA	NA	5933.851	585.963	NA	NA	4271.796	38.894	2978.192	1100.807	122138.241	6.048	NA	165.053	1079601.404	30.535	69.269	7.377	168.278	325.413	139.889	21288.862	1945.89	9369.634	3082.808	1103715.238	3146.822	4502446.552	14.386	NA	3856.488	509086.643	NA	1004364.576	94.449	3065.945	60.117	16312.964	4608.407	1070.24	1002.672	190.488	218.548	8537478.035	1989.234	48.474
BlM_exp2-plasma_post	11.035	76.728	NA	NA	NA	670.077	451.959	NA	NA	5894.703	345.37	4681.43	1841.439	84282.397	5.161	NA	815.268	1597463.114	159.398	23.363	45.264	358.183	1141.843	637.971	26905.186	1511.15	4303.81	3784.067	2688240.971	13700.714	5310566.36	61.127	NA	865.348	524902.823	NA	966274.463	34.346	1935.079	44.303	22360.278	2070.832	1431.058	1215.123	323.881	279.476	9556555.644	1306.61	75.96
BlM-exp3-plasma_post	NA	NA	8.689	6.455	67.256	NA	NA	7582.7	466.371	NA	NA	NA	NA	NA	NA	4146.897	NA	NA	NA	NA	NA	NA	NA	NA	NA	NA	NA	NA	NA	NA	NA	NA	847.52	NA	NA	1077.609	NA	NA	NA	NA	NA	NA	NA	NA	NA	NA	NA	NA	NA
QC-exp2-plasma_5a	NA	NA	729.862	11008.236	21384.129	NA	NA	23816.814	120324.876	NA	NA	NA	NA	NA	NA	11774.544	NA	NA	NA	NA	NA	NA	NA	NA	NA	NA	NA	NA	NA	NA	NA	NA	6083.8	NA	NA	4054.592	NA	NA	NA	NA	NA	NA	NA	NA	NA	NA	NA	NA	NA
QC_exp123-plasma_pre.baplasma1	421.902	NA	NA	NA	NA	NA	NA	NA	NA	NA	NA	NA	NA	NA	1743.795	NA	NA	NA	NA	2086.335	NA	NA	NA	NA	NA	NA	NA	NA	NA	NA	NA	30362.508	NA	NA	NA	NA	NA	2005.551	NA	13754.194	NA	NA	NA	NA	NA	9661.925	NA	NA	NA
QC-exp2-plasma_5b	NA	NA	676.185	11499.856	21796.148	NA	NA	13524.266	124596.087	NA	NA	NA	NA	NA	NA	12102.017	NA	NA	NA	NA	NA	NA	NA	NA	NA	NA	NA	NA	NA	NA	NA	NA	6895.435	NA	NA	3672.726	NA	NA	NA	NA	NA	NA	NA	NA	NA	NA	NA	NA	NA
QC_exp1-plasma_5b	556.386	29853.983	NA	NA	NA	442512.89	773339.857	NA	NA	9511.618	17800.07	2346427.164	75485.686	14197817.546	3357.545	NA	11469.846	101712776.477	259401.747	2376.751	2044.948	29199.367	145156.687	81573.448	1408952.807	235960.881	241269.106	4535.776	508201.334	287479.925	992555.11	48052.549	NA	NA	434574.924	NA	850067.581	2494.187	1665827.879	17067.066	16015154.135	1217485.189	4028708.157	148790.948	11940.648	14748.116	1861561.461	140375.241	4735.932
QC-exp2-plasma_5c	NA	NA	643.225	10412.313	19231.76	NA	NA	14914.07	124141.972	NA	NA	NA	NA	NA	NA	11736.722	NA	NA	NA	NA	NA	NA	NA	NA	NA	NA	NA	NA	NA	NA	NA	NA	6542.633	NA	NA	3648.823	NA	NA	NA	NA	NA	NA	NA	NA	NA	NA	NA	NA	NA
QC_exp1-plasma_5c	682.027	32299.283	NA	NA	NA	467497.19	806061.604	NA	NA	9633.831	16979.388	2499868.222	72714.08	14786888.434	3253.918	NA	11183.227	103252805.605	262880.825	2139.593	2041.908	30577.513	138825.776	103821.354	1417090.34	253330.938	254891.697	4842.821	543195.557	298446.973	1038031.018	49055.111	NA	NA	462235.596	NA	901553.767	2512.445	1758790.825	17103.471	16549407.898	1340032.819	3873931.071	160827.484	12082.843	13722.52	1916051.052	144620.069	4198.112
QC_exp1-plasma_5a	504.521	32698.11	NA	NA	NA	482467.097	824628.52	NA	NA	11058.679	18608.805	2492647.559	74973.996	15498950.343	3810.875	NA	12548.46	119539669.505	232745.213	2188.96	2101.17	31951.052	151873.76	105308.548	1635006.275	231815.312	256688.528	5678.421	594124.243	278194.929	1041672.058	50498.903	NA	1195.775	480339.958	NA	944699.273	2408.479	1812847.016	17595.549	17167171.313	1231787.114	3794545.71	168000.112	14102.83	16203.189	1949626.093	149794.299	4376.297
QC-exp2-plasma_5d	NA	NA	559.03	10004.587	18589.133	NA	NA	14372.714	123369.348	NA	NA	NA	NA	NA	NA	11794.78	NA	NA	NA	NA	NA	NA	NA	NA	NA	NA	NA	NA	NA	NA	NA	NA	6065.661	NA	NA	3699.453	NA	NA	NA	NA	NA	NA	NA	NA	NA	NA	NA	NA	NA
QC_exp3-plasma_5d	NA	NA	NA	NA	NA	NA	NA	NA	NA	NA	NA	NA	NA	NA	NA	NA	NA	NA	NA	NA	NA	NA	NA	NA	NA	NA	NA	NA	NA	NA	NA	NA	NA	1547.007	NA	NA	NA	NA	NA	NA	NA	NA	NA	NA	NA	NA	NA	NA	NA
QC_exp1-plasma_5d	587.098	32438.969	NA	NA	NA	496272.967	852773.382	NA	NA	11648.935	18968.754	2608460.182	86050.274	15444254.771	3863.264	NA	13553.033	105451678.176	264034.213	2629.605	1873.364	32876.497	148044.047	120479.426	1593587.273	263558.102	263654.777	5528.948	599761.466	323778.025	1079659.214	47627.193	NA	NA	490029.972	NA	966489.698	2798.592	1780656.441	16727.751	17447282.861	1475508.622	3682447.275	175813.986	13760.107	13406.82	1974028.959	155986.893	4013.564
QC-exp2-plasma_5e	NA	NA	601.647	10811.465	18576.62	NA	NA	16216.325	125797.414	NA	NA	NA	NA	NA	NA	12227.987	NA	NA	NA	NA	NA	NA	NA	NA	NA	NA	NA	NA	NA	NA	NA	NA	6459.515	NA	NA	3605.101	NA	NA	NA	NA	NA	NA	NA	NA	NA	NA	NA	NA	NA
QC_exp1-plasma_6a	NA	30900.675	NA	NA	NA	478832.812	820424.368	NA	NA	10241.069	17014.999	2550235.35	72087.656	15121235.046	NA	NA	8679.206	117065510.943	230521.851	NA	2333.087	31625.972	152008.117	119583.65	1679310.35	243547.703	241501.272	5474.513	576700.418	289048.777	1546408.972	NA	NA	NA	472851.48	NA	957787.616	NA	1926612.643	NA	16930648.292	1328220.075	3558231.527	177243.084	13635.324	NA	2901887.594	148668.514	3966.82
QC-exp2-plasma_5f	NA	NA	596.043	10891.057	20214.211	NA	NA	16323.52	122832.628	NA	NA	NA	NA	NA	NA	11782.554	NA	NA	NA	NA	NA	NA	NA	NA	NA	NA	NA	NA	NA	NA	NA	NA	6175.144	NA	NA	3722.239	NA	NA	NA	NA	NA	NA	NA	NA	NA	NA	NA	NA	NA
QC_exp3-plasma_5f	NA	NA	NA	NA	NA	NA	NA	NA	NA	NA	NA	NA	NA	NA	NA	NA	NA	NA	NA	NA	NA	NA	NA	NA	NA	NA	NA	NA	NA	NA	NA	NA	NA	1602.958	NA	NA	NA	NA	NA	NA	NA	NA	NA	NA	NA	NA	NA	NA	NA
QC_exp1-plasma_5f	663.635	NA	NA	NA	NA	NA	NA	NA	NA	NA	NA	NA	NA	NA	4730.15	NA	NA	NA	NA	2524.815	NA	NA	NA	NA	NA	NA	NA	NA	NA	NA	NA	54825.17	NA	NA	NA	NA	NA	3260.622	NA	17704.28	NA	NA	NA	NA	NA	13919.467	NA	NA	NA
QC_exp1-plasma_6b	NA	25466.69	NA	NA	NA	415350.628	725225.551	NA	NA	9326.242	16356.02	2216075.356	68297.684	13849253.198	NA	NA	6926.5	107994608.548	185450.223	NA	2279.368	27019.843	127475.332	123440.263	1387847.43	201179.695	212617.426	4037.154	588260.206	257087.932	1404728.698	NA	NA	NA	433710.277	NA	864516.175	NA	1775885.456	NA	15006198.759	1156613.15	3036773.675	160072.934	10876.236	NA	2789355.25	132163.397	3546.473
QC-exp2-plasma_4f	NA	NA	680.7	10165.031	19831.507	NA	NA	14661.23	124723.601	NA	NA	NA	NA	NA	NA	11922.578	NA	NA	NA	NA	NA	NA	NA	NA	NA	NA	NA	NA	NA	NA	NA	NA	6459.495	NA	NA	4673.18	NA	NA	NA	NA	NA	NA	NA	NA	NA	NA	NA	NA	NA
QC_exp1-plasma_5e	584.824	30305.151	NA	NA	NA	465308.35	808891.834	NA	NA	11097.904	17605.395	2480837.738	76117.331	15432918.866	3933.719	NA	10503.187	123842733.249	204077.247	2797.275	2692.822	30960.385	147241.18	123899.848	1612976.083	222456.992	256866.584	5094.231	657442.942	288802.779	1046896.736	51078.468	NA	NA	485424.196	NA	952332.653	2730.392	1873094.384	17166.768	16694907.76	1318779.849	3156287.39	191442.346	14190.938	13144.534	2068889.333	145835.963	4044.531
QC-exp2-plasma_5g	NA	NA	684.001	10599.571	19946.786	NA	NA	17108.063	120441.174	NA	NA	NA	NA	NA	NA	11663.532	NA	NA	NA	NA	NA	NA	NA	NA	NA	NA	NA	NA	NA	NA	NA	NA	6182.391	NA	NA	3146.42	NA	NA	NA	NA	NA	NA	NA	NA	NA	NA	NA	NA	NA
QC_exp3-plasma_5g	NA	NA	NA	NA	NA	NA	NA	NA	NA	NA	NA	NA	NA	NA	NA	NA	NA	NA	NA	NA	NA	NA	NA	NA	NA	NA	NA	NA	NA	NA	NA	NA	NA	1435.106	NA	NA	NA	NA	NA	NA	NA	NA	NA	NA	NA	NA	NA	NA	NA
QC_exp1-plasma_5g	765.769	NA	NA	NA	NA	NA	NA	NA	NA	NA	NA	NA	NA	NA	5781.537	NA	NA	NA	NA	1823.962	NA	NA	NA	NA	NA	NA	NA	NA	NA	NA	NA	64500.458	NA	NA	NA	NA	NA	3865.066	NA	19040.471	NA	NA	NA	NA	NA	15389.382	NA	NA	NA
QC-exp1-plasma_7a	NA	NA	628.647	9561.059	21144.99	NA	NA	15205.562	93322.525	NA	NA	NA	NA	NA	NA	10642.41	NA	NA	NA	NA	NA	NA	NA	NA	NA	NA	NA	NA	NA	NA	NA	NA	6867.909	NA	NA	4757.274	NA	NA	NA	NA	NA	NA	NA	NA	NA	NA	NA	NA	NA
QC_exp1-plasma_6c	NA	27602.223	NA	NA	NA	420296.207	739965.829	NA	NA	9808.135	14179.885	2302474.922	63097.977	14293957.545	NA	NA	7549.083	110637111.494	183766.642	NA	2228.981	28060.229	136429.059	122655.761	1426421.283	205291.904	226958.864	4234.304	607520.015	254030.431	1437759.159	NA	NA	NA	453476.318	NA	894357.674	NA	1800509.993	NA	15607973.237	1174129.693	3095704.374	172397.407	13045.793	NA	2811223.633	139489.891	3901.426
QC_exp3-plasma_5a	NA	27075.862	NA	NA	NA	415569.189	808374.918	NA	NA	11064.654	21608.993	2361765.423	65039.811	12305864.904	NA	NA	8937.477	88861298.066	233173.851	NA	2102.655	24085.169	168539.434	97800.735	1587997.614	233246.556	198937.481	7539.477	748168.688	251636.63	1291526.691	NA	NA	2196.92	465069.082	NA	1018698.537	NA	1508247.199	NA	15725011.379	1176439.834	2867175.913	163430.729	13328.072	NA	2407336.566	147206.058	4931.907
QC_exp1-plasma_5i	916.699	NA	NA	NA	NA	NA	NA	NA	NA	NA	NA	NA	NA	NA	8351.163	NA	NA	NA	NA	2429.338	NA	NA	NA	NA	NA	NA	NA	NA	NA	NA	NA	80658.185	NA	NA	NA	NA	NA	3901.041	NA	21922.205	NA	NA	NA	NA	NA	17001.948	NA	NA	NA
QC_exp123-plasma_post.baplasma1	653.186	NA	NA	NA	NA	NA	NA	NA	NA	NA	NA	NA	NA	NA	4763.03	NA	NA	NA	NA	2209.037	NA	NA	NA	NA	NA	NA	NA	NA	NA	NA	NA	50076.498	NA	NA	NA	NA	NA	3196.645	NA	17394.598	NA	NA	NA	NA	NA	11719.687	NA	NA	NA
QC-exp1-plasma_7b	NA	NA	646.074	9567.425	21153.875	NA	NA	14378.321	95017.773	NA	NA	NA	NA	NA	NA	11091.874	NA	NA	NA	NA	NA	NA	NA	NA	NA	NA	NA	NA	NA	NA	NA	NA	7177.142	NA	NA	4858.2	NA	NA	NA	NA	NA	NA	NA	NA	NA	NA	NA	NA	NA
QC_batch-exp1-plasma_PA_5b	NA	NA	NA	NA	NA	NA	NA	NA	NA	NA	NA	NA	NA	NA	NA	NA	NA	NA	NA	NA	NA	NA	NA	NA	NA	NA	NA	NA	NA	NA	NA	NA	NA	1211.786	NA	NA	NA	NA	NA	NA	NA	NA	NA	NA	NA	NA	NA	NA	NA
QC_exp1-plasma_6d	NA	30076.352	NA	NA	NA	446074.553	780072.851	NA	NA	10470.25	17820.875	2334106.015	65361.794	15089768.557	NA	NA	8740.231	117268347.144	187336.87	NA	2038.759	29787.189	144706.811	125916.493	1629118.434	208816.534	231390.373	5000.6	629794.036	260284.737	1545511.732	NA	NA	NA	472440.966	NA	939482.289	NA	1877894.311	NA	16297823.083	1164782.908	3255953.775	161136.061	12743.866	NA	2953588.683	141687.685	3706.949
QC_exp123-plasma_pre.baplasma2	844.396	NA	NA	NA	NA	NA	NA	NA	NA	NA	NA	NA	NA	NA	7376.69	NA	NA	NA	NA	2790.225	NA	NA	NA	NA	NA	NA	NA	NA	NA	NA	NA	48413.02	NA	NA	NA	NA	NA	2986.284	NA	16578.473	NA	NA	NA	NA	NA	8299.56	NA	NA	NA
QC_exp2-plasma_5a	348.321	27882.873	NA	NA	NA	473703.293	954619.234	NA	NA	12710.296	21072.829	2617411.875	77095.207	14767073.506	199.038	NA	9662.678	109061241.719	214931.18	2042.156	2149.466	24500.979	219927.537	144782.642	1730051.467	244246.364	229321.41	8339.677	900183.233	271668.658	2123729.615	28375.911	NA	NA	590168.902	NA	1221912.156	1871.991	1827960.475	12688.075	18374531.382	1108100.666	2963055.382	177123.737	14700.736	10957.422	3915720.594	167120.766	3402.989
QC_exp3-plasma_5b	NA	27233.217	NA	NA	NA	462001.715	890879.968	NA	NA	11522.613	20812.066	2535452.111	74190.187	14381883.179	NA	NA	10079.593	111540019.302	234565.848	NA	2089.864	26015.805	187218.512	125238.716	1483243.493	256242.097	228106.549	5687.217	748366.431	274709.439	1623478.842	NA	NA	2069.502	526565.925	NA	1075760.413	NA	1727783.613	NA	17347132.775	1161997.146	3277350.181	171763.625	14174.716	NA	3071528.935	153281.453	3462.652
QC-exp1-plasma_7c	NA	NA	615.165	9382.746	19539.639	NA	NA	15670.645	95831.017	NA	NA	NA	NA	NA	NA	10608.897	NA	NA	NA	NA	NA	NA	NA	NA	NA	NA	NA	NA	NA	NA	NA	NA	6940.818	NA	NA	5266.365	NA	NA	NA	NA	NA	NA	NA	NA	NA	NA	NA	NA	NA
QC_batch-exp1-plasma_PA_5c	NA	NA	NA	NA	NA	NA	NA	NA	NA	NA	NA	NA	NA	NA	NA	NA	NA	NA	NA	NA	NA	NA	NA	NA	NA	NA	NA	NA	NA	NA	NA	NA	NA	1325.773	NA	NA	NA	NA	NA	NA	NA	NA	NA	NA	NA	NA	NA	NA	NA
QC_exp2-plasma_5b	452.465	28492.742	NA	NA	NA	469467.712	955521.023	NA	NA	12183.577	20891.426	2750961.475	87029.452	14912661.538	3585.653	NA	11389.326	112626522.873	263544.294	2237.213	2655.048	22560.209	221595.242	128055.725	1462808.833	281217.115	244200.905	7253.806	870795.885	302781.891	2255059.198	28438.824	NA	NA	585040.381	NA	1162124.637	1882.172	1772469.179	13342.434	17960915.617	1272920.146	3479917.59	179804.603	17468.655	11477.49	4182143.019	160237.789	2977.401
QC_exp3-plasma_5c	NA	27551.721	NA	NA	NA	474007.015	917374.865	NA	NA	12297.701	18022.843	2553183.47	85790.184	15613485.9	NA	NA	9946.594	115161073.248	242184.184	NA	2413.056	25097.184	199218.786	133797.188	1554033.532	249828.167	239044.941	6003.816	785176.935	301767.268	2729351.264	NA	NA	1787.132	570638.925	NA	1136465.977	NA	1911787.757	NA	17992559.259	1138828.254	3415897.542	174457.379	15340.039	NA	5141462.892	160955.076	2965.604
QC-exp1-plsma_7d	NA	NA	624.829	9068.452	20114.912	NA	NA	15232.365	96010.155	NA	NA	NA	NA	NA	NA	10507.824	NA	NA	NA	NA	NA	NA	NA	NA	NA	NA	NA	NA	NA	NA	NA	NA	7118.074	NA	NA	4647.765	NA	NA	NA	NA	NA	NA	NA	NA	NA	NA	NA	NA	NA
QC_batch-exp1-plasma_PA_5d	NA	NA	NA	NA	NA	NA	NA	NA	NA	NA	NA	NA	NA	NA	NA	NA	NA	NA	NA	NA	NA	NA	NA	NA	NA	NA	NA	NA	NA	NA	NA	NA	NA	1039.541	NA	NA	NA	NA	NA	NA	NA	NA	NA	NA	NA	NA	NA	NA	NA
QC_exp2-plasma_5c	363.598	27737.347	NA	NA	NA	472998.185	962620.46	NA	NA	12762.481	21780.756	2648711.648	88209.079	15160620.228	2827.8	NA	11805.933	116710466.875	253926.596	2489.449	2269.055	22031.638	222246.839	141997.505	1622928.945	264800.133	240403.205	5736.874	889464.272	293792.535	2310406.471	29926.068	NA	NA	597306.078	NA	1199013.616	2180.067	1790265.735	13693.908	18325707.522	1280036.419	3427545.348	179994.976	15495.505	11955.14	4298281.427	166276.603	3022.022
QC-exp1-plasma_7e	NA	NA	701.561	8682.707	21237.937	NA	NA	18225.598	95967.504	NA	NA	NA	NA	NA	NA	10464.178	NA	NA	NA	NA	NA	NA	NA	NA	NA	NA	NA	NA	NA	NA	NA	NA	7390.321	NA	NA	4599.597	NA	NA	NA	NA	NA	NA	NA	NA	NA	NA	NA	NA	NA
QC_batch-exp1-plasma_PA_5e	NA	NA	NA	NA	NA	NA	NA	NA	NA	NA	NA	NA	NA	NA	NA	NA	NA	NA	NA	NA	NA	NA	NA	NA	NA	NA	NA	NA	NA	NA	NA	NA	NA	929.087	NA	NA	NA	NA	NA	NA	NA	NA	NA	NA	NA	NA	NA	NA	NA
QC_exp2-plasma_6a	NA	28032.741	NA	NA	NA	448827.101	917792.144	NA	NA	10742.62	17535.176	2524987.274	72153.54	14087352.829	NA	NA	8241.072	108997696.229	228223.202	NA	2514.435	26771.121	206812.715	141467.924	1469119.013	251656.4	209370.316	6201.746	845302.421	276391.584	2058877.25	NA	NA	NA	530234.1	NA	1140178.978	NA	1756880.942	NA	17425439.675	1065599.29	3081364.437	171551.43	14673.819	NA	3820855.137	159717.422	2917.195
QC_exp2-plasma_5e	402.758	NA	NA	NA	NA	NA	NA	NA	NA	NA	NA	NA	NA	NA	2771.84	NA	NA	NA	NA	2548.63	NA	NA	NA	NA	NA	NA	NA	NA	NA	NA	NA	30941.501	NA	NA	NA	NA	NA	1903.986	NA	14299.756	NA	NA	NA	NA	NA	11977.218	NA	NA	NA
QC_exp2-plasma_6b	NA	26483.247	NA	NA	NA	456757.986	931522.126	NA	NA	11833.756	19237.938	2547611.41	75370.254	14064282.855	NA	NA	8297.413	107697070.601	227856.414	NA	2426.591	25367.142	209686.704	133034.136	1436980.695	261056.569	216978.66	6682.436	854414.784	267203.296	2046858.849	NA	NA	NA	548376.792	NA	1181238.441	NA	1709002.38	NA	17718915.226	1089734.186	2980117.751	182162.273	14497.361	NA	3772010.371	161679.465	3443.205
QC-exp1-plasma_7f	NA	NA	549.336	8546.362	18649.414	NA	NA	15262.921	93471.975	NA	NA	NA	NA	NA	NA	10683.922	NA	NA	NA	NA	NA	NA	NA	NA	NA	NA	NA	NA	NA	NA	NA	NA	6496.112	NA	NA	4671.99	NA	NA	NA	NA	NA	NA	NA	NA	NA	NA	NA	NA	NA
QC_batch-exp1-plasma_PA_5f	NA	NA	NA	NA	NA	NA	NA	NA	NA	NA	NA	NA	NA	NA	NA	NA	NA	NA	NA	NA	NA	NA	NA	NA	NA	NA	NA	NA	NA	NA	NA	NA	NA	928.855	NA	NA	NA	NA	NA	NA	NA	NA	NA	NA	NA	NA	NA	NA	NA
QC_exp3-plasma_5e	NA	29260.974	NA	NA	NA	493458.689	946483.581	NA	NA	13305.827	19103.534	2593758.68	86473.325	15825891.45	NA	NA	10930.656	102547956.441	196544.217	NA	2526.235	24639.894	200836.418	168548.405	1644760.279	221408.868	240436.334	7056.298	851488.983	305828.145	3655073.303	NA	NA	1900.905	599896.167	NA	1225666.561	NA	1953406.253	NA	18582173.726	1077656.519	2563926.337	189664.35	17034.378	NA	6770624.417	167747.301	4018.952
QC_exp2-plasma_5d	403.1	29176.929	NA	NA	NA	496552.474	997630.62	NA	NA	12690.486	20037.457	2762047.973	89439.12	16550430.766	3198.627	NA	11150.763	125788200.758	236098.577	2431.813	2208.378	20875.482	227620.711	154490.43	1794331.209	259690.609	263467.46	8070.3	932972.216	298731.678	2532905.407	30246.579	NA	NA	663157.395	NA	1227557.116	2093.286	1979901.133	13429.16	19239142.465	1289079.075	3639269.082	192237.235	15800.154	11724.29	4644954.093	170451.502	2507.068
QC-exp1-plasma_7g	NA	NA	557.031	8338.699	20110.441	NA	NA	13671.434	93901.785	NA	NA	NA	NA	NA	NA	10373.155	NA	NA	NA	NA	NA	NA	NA	NA	NA	NA	NA	NA	NA	NA	NA	NA	6640.42	NA	NA	4541.394	NA	NA	NA	NA	NA	NA	NA	NA	NA	NA	NA	NA	NA
QC_exp2-plasma_5f	282.642	NA	NA	NA	NA	NA	NA	NA	NA	NA	NA	NA	NA	NA	2450.976	NA	NA	NA	NA	3001.164	NA	NA	NA	NA	NA	NA	NA	NA	NA	NA	NA	30007.211	NA	NA	NA	NA	NA	1995.353	NA	13977.833	NA	NA	NA	NA	NA	12719.236	NA	NA	NA
QC_exp2-plasma_6c	NA	27907.016	NA	NA	NA	467508.197	945677.59	NA	NA	12875.063	22747.531	2621038.966	79890.286	14490776.166	NA	NA	9634.17	108287407.566	222277.813	NA	2351.912	27454.616	216450.902	145506.347	1654978.038	251540.421	222879.55	7065.55	885484.164	278339.874	2051714.173	NA	NA	NA	566993.139	NA	1212638.144	NA	1731061.467	NA	18253344.079	1159293.567	2917896.163	178958.266	15216.289	NA	3845371.623	164844.231	3386.237
QC_batch-exp1-plasma_PA_5g	NA	NA	NA	NA	NA	NA	NA	NA	NA	NA	NA	NA	NA	NA	NA	NA	NA	NA	NA	NA	NA	NA	NA	NA	NA	NA	NA	NA	NA	NA	NA	NA	NA	838.392	NA	NA	NA	NA	NA	NA	NA	NA	NA	NA	NA	NA	NA	NA	NA
QC-exp1-plasma_7h	NA	NA	617.119	8229.581	20273.122	NA	NA	12544.748	91710.095	NA	NA	NA	NA	NA	NA	9993.796	NA	NA	NA	NA	NA	NA	NA	NA	NA	NA	NA	NA	NA	NA	NA	NA	7206.088	NA	NA	4423.328	NA	NA	NA	NA	NA	NA	NA	NA	NA	NA	NA	NA	NA
QC_exp1-plasma_5h	NA	NA	NA	NA	NA	NA	NA	NA	NA	NA	NA	NA	NA	NA	NA	NA	NA	NA	NA	NA	NA	NA	NA	NA	NA	NA	NA	NA	NA	NA	NA	NA	NA	760.97	NA	NA	NA	NA	NA	NA	NA	NA	NA	NA	NA	NA	NA	NA	NA
QC_exp2-plasma_5g	385.154	NA	NA	NA	NA	NA	NA	NA	NA	NA	NA	NA	NA	NA	1805.247	NA	NA	NA	NA	2265.157	NA	NA	NA	NA	NA	NA	NA	NA	NA	NA	NA	28346.833	NA	NA	NA	NA	NA	1000.932	NA	13189.838	NA	NA	NA	NA	NA	12174.085	NA	NA	NA
[truncated: 274 more rows]
[truncated: 107 more columns]

## Sheet: AreaCorrLog2Cen
Sid	12-dehydrocholic acid@5.34-ba	2-aminoadipic acid@15.25-gc	2-hydroxy-2-methylbutyric acid@3.43-sf	2-hydroxy-3-methylbutyric acid@4.53-sf	2-hydroxybutyric acid@2.47-sf	2-hydroxyglutaric acid@13.02-gc	2-oxoglutaric acid@13.03-gc	2-oxovaleric acid@14.60-sf	3-hydroxybutyric acid@1.66-sf	3-hydroxyisovaleric acid@7.83-gc	4-hydroxymandelic acid@15.24-gc	4-hydroxyproline@12.45-gc	5-aminovaleric acid@13.54-gc	5-oxoproline@12.36-gc	7,12-dihydroxy-3-oxocholanoic acid@6.49-ba	Acetic acid@1.78-sf	Adenine@16.20-gc	Alanine@6.92-gc	Allantoin@16.56-gc	Alpha-muricholic acid@5.94-ba	Alpha-tocopherol@29.53-gc	Anthranilic acid@13.44-gc	Arabinose@14.19-gc	Arabitol@14.83-gc	Arachidonic acid@23.77-gc	Asparagine@14.14-gc	Aspartic acid@12.38-gc	Behenic acid@26.42-gc	Benzoic acid@8.77-gc	Beta-alanine@11.17-gc	Beta-hydroxypyruvic acid@5.46-gc	Beta-muricholic acid@6.22-ba	Butanoic acid@5.21-sf	Cadaverine@4.64-pa	Capric acid@11.46-gc	Caproic acid@12.05-sf	Caprylic acid@8.96-gc	Chenodeoxycholic acid@10.31-ba	Cholesterol@29.53-gc	Cholic acid@9.11-ba	Citric acid;Isocitric acid@15.82-gc	Citrulline@15.79-gc	Creatine@12.81-gc	Cystine;Cysteine@23.03-gc	Cytosine@12.38-gc	Deoxycholic acid@10.53-ba	Dimethylglycine@5.46-gc	Erythritol@12.31-gc	Ferulic acid@19.23-gc
[truncated: 341 more rows]
[truncated: 107 more columns]

[truncated: 3 more sheets: RatioInfos, Ratio, RatioLog2Cen]
