# Supplementary material for: Oral administration of Akkermansia muciniphila elevates systemic antiaging and anticancer metabolites
Source: Aging (Albany NY). 2021 Mar 2;13(5):6375–405. doi: 10.18632/aging.202739 (PMC7993698; doi:10.18632/aging.202739)
Supplement: Supplementary Table 5 [file aging-13-202739-s006.xlsx]

## Sheet: SampleInfos
Supplementary Table 5. Related to Figures 5, 6. Metabolic signature obtained through untargeted metabolomic analysis from ILEUM samples from mice treated with FMT, Akk or with Akk-past (versus PBS or continuous ATB).
Sid	sType	Grp	Color
ileon-694-ATB_89	Sa	ATB	#FB6A4A
ileon-691-ATB_86	Sa	ATB	#FB6A4A
ileon-688-ATB_83	Sa	ATB	#FB6A4A
ileon-686-ATB_81	Sa	ATB	#FB6A4A
ileon-692-ATB_87	Sa	ATB	#FB6A4A
ileon-690-ATB_85	Sa	ATB	#FB6A4A
ileon-669-FMT_64	Sa	FMT	#9E9AC8
ileon-678-FMT_73	Sa	FMT	#9E9AC8
ileon-682-FMT_77	Sa	FMT	#9E9AC8
ileon-683-FMT_78	Sa	FMT	#9E9AC8
ileon-670-FMT_65	Sa	FMT	#9E9AC8
ileon-666-FMT_61	Sa	FMT	#9E9AC8
ileon-674-FMT-AKK_69	Sa	FMT-AKK	#7960AB
ileon-672-FMT-AKK_67	Sa	FMT-AKK	#7960AB
ileon-679-FMT-AKK_74	Sa	FMT-AKK	#7960AB
ileon-680-FMT-AKK_75	Sa	FMT-AKK	#7960AB
ileon-675-FMT-AKK_70	Sa	FMT-AKK	#7960AB
ileon-668-FMT-AKK_63	Sa	FMT-AKK	#7960AB
ileon-671-FMT-AKK-Pas_66	Sa	FMT-AKK-Pas	#54278F
ileon-677-FMT-AKK-Pas_72	Sa	FMT-AKK-Pas	#54278F
ileon-673-FMT-AKK-Pas_68	Sa	FMT-AKK-Pas	#54278F
ileon-676-FMT-AKK-Pas_71	Sa	FMT-AKK-Pas	#54278F
ileon-681-FMT-AKK-Pas_76	Sa	FMT-AKK-Pas	#54278F
ileon-667-FMT-AKK-Pas_62	Sa	FMT-AKK-Pas	#54278F
Bl_matrice-colon_3c	Bl	#N/A	#N/A
QC_ileon_5e	QC	#N/A	#N/A
QC_ileon_5d	QC	#N/A	#N/A
QC_ileon_5c	QC	#N/A	#N/A
QC_ileon_5b	QC	#N/A	#N/A
QC_ileon_5a	QC	#N/A	#N/A
Bl_matrice-colon_3b	Bl	#N/A	#N/A
ileon-695-SPF_90	Sa	SPF	#74C476
ileon-693-SPF_88	Sa	SPF	#74C476
ileon-687-SPF_82	Sa	SPF	#74C476
ileon-689-SPF_84	Sa	SPF	#74C476
ileon-685-SPF_80	Sa	SPF	#74C476
ileon-684-SPF_79	Sa	SPF	#74C476

## Sheet: MetabolitesInfos
Checked	Analyte	MetName	MW	RT	MF	CSID	KEGG	Method
VRAI	2-hydroxyvalericacid@2.26-rp	2-hydroxyvalericacid	118.063	2.26	C5H10O3	88482	Metabolic pathways;Other	rp
VRAI	Tetralin@7.638-rp	Tetralin	132.094	7.638	C10H12	8097	Microbial metabolism in diverse environments;Other	rp
VRAI	3-Phenyl-1-propanol@9.903-rp	3-Phenyl-1-propanol	136.089	9.903	C9H12O	13871718	#N/A	rp
VRAI	Gabaculine@6.366-rp	Gabaculine	139.063	6.366	C7H9NO2	3327	#N/A	rp
VRAI	2-Methyl-3-oxocyclopentanecarboxylicacid@1.754-rp	2-Methyl-3-oxocyclopentanecarboxylicacid	142.063	1.754	C7H10O3	310466	#N/A	rp
VRAI	5-Amino-2,5-dioxopentanoate@6.393-rp	5-Amino-2,5-dioxopentanoate	144.03	6.393	C5H6NO4	134184	#N/A	rp
VRAI	4-(Chloromethyl)-3-methoxy-5-methyl-1,2-oxazole@6.397-rp	4-(Chloromethyl)-3-methoxy-5-methyl-1,2-oxazole	161.024	6.397	C6H8ClNO2	9280797	#N/A	rp
VRAI	Poly-(3-aminopropylmethylsiloxane)@10.945-rp	Poly-(3-aminopropylmethylsiloxane)	173.124	10.945	C8H19NOSi	#N/A	#N/A	rp
VRAI	3-Methylbutylbenzoate@7.649-rp	3-Methylbutylbenzoate	192.115	7.649	C12H16O2	#N/A	Metabolic pathways;Biosynthesis of secondary metabolites;Ubiquinone and other terpenoid-quinone biosynthesis	rp
VRAI	205.07205@9.176-rp	#N/A	205.072	9.176	C7H7N7O	#N/A	#N/A	rp
VRAI	Acetyleugenol@9.895-rp	Acetyleugenol	206.094	9.895	C12H14O3	6869	Metabolic pathways;Biosynthesis of secondary metabolites;Ubiquinone and other terpenoid-quinone biosynthesis;Other	rp
VRAI	Dihydrolipoamide@1.124-rp	Dihydrolipoamide	207.076	1.124	C8H17NOS2	643	#N/A	rp
VRAI	4-Heptyloxyphenol@7.859-rp	4-Heptyloxyphenol	208.146	7.859	C13H20O2	#N/A	#N/A	rp
VRAI	Gostatin@1.676-rp	Gostatin	214.059	1.676	C8H10N2O5	91339	#N/A	rp
VRAI	214.08195@5.02-rp	#N/A	214.082	5.02	C14H14S	#N/A	#N/A	rp
VRAI	6-(1H-Imidazol-2-ylsulfanyl)-7H-purine@6.396-rp	6-(1H-Imidazol-2-ylsulfanyl)-7H-purine	218.038	6.396	C8H6N6S	8236688	#N/A	rp
VRAI	Sinapicacid@6.454-rp	Sinapicacid	224.069	6.454	C11H12O5	10290	Metabolic pathways;Biosynthesis of secondary metabolites;Phenylpropanoid biosynthesis;2-Oxocarboxylic acid metabolism;Biosynthesis of phenylpropanoids;Other	rp
VRAI	4-(4-Hydroxy-3,5-dimethoxyphenyl)-2-butanone@9.905-rp	4-(4-Hydroxy-3,5-dimethoxyphenyl)-2-butanone	224.105	9.905	C12H16O4	4446792	Metabolic pathways;Biosynthesis of secondary metabolites;Other	rp
VRAI	(?)-trans-Methyldihydrojasmonate@7.867-rp	(?)-trans-Methyldihydrojasmonate	226.157	7.867	C13H22O3	1376701	#N/A	rp
VRAI	Octenylsuccinicacid@7.958-rp	Octenylsuccinicacid	228.137	7.958	C12H20O4	#N/A	Biosynthesis of secondary metabolites;Other	rp
VRAI	8-(Methylsulfinyl)octylisothiocyanate@1.99-rp	8-(Methylsulfinyl)octylisothiocyanate	233.09	1.99	C10H19NOS2	7970426	#N/A	rp
VRAI	JussiaeiineA@3.6-rp	JussiaeiineA	236.152	3.6	C13H20N2O2	#N/A	#N/A	rp
VRAI	Equol@9.917-rp	Equol	242.094	9.917	C15H14O3	#N/A	Microbial metabolism in diverse environments;Other	rp
VRAI	244.99993@6.399-rp	#N/A	245	6.399	C8H7NO6S	#N/A	#N/A	rp
VRAI	PerfragilinA@6.385-rp	PerfragilinA	250.041	6.385	C11H10N2O3S	#N/A	#N/A	rp
VRAI	250.10579@3.643-rp	#N/A	250.106	3.643	C11H14N4O3	#N/A	#N/A	rp
VRAI	Isoliquiritigenin@9.11-rp	Isoliquiritigenin	256.073	9.11	C15H12O4	553829	Biosynthesis of secondary metabolites;Microbial metabolism in diverse environments;Biosynthesis of phenylpropanoids;Other	rp
VRAI	Yangonin@10.637-rp	Yangonin	258.089	10.637	C15H14O4	4444896	Microbial metabolism in diverse environments;Degradation of aromatic compounds;Biosynthesis of phenylpropanoids;Other	rp
VRAI	O-Demethylangolensin@10.34-rp	O-Demethylangolensin	258.089	10.34	C15H14O4	#N/A	Microbial metabolism in diverse environments;Degradation of aromatic compounds;Biosynthesis of phenylpropanoids;Other	rp
VRAI	263.01074@6.397-rp	#N/A	263.011	6.397	C8H11NO5P2	#N/A	#N/A	rp
VRAI	2,3,4,5,6,7,8,9-Octahydroxynonanal@1.365-rp	2,3,4,5,6,7,8,9-Octahydroxynonanal	270.095	1.365	C9H18O9	#N/A	#N/A	rp
VRAI	(±)-Naringenin@9.28-rp	(±)-Naringenin	272.068	9.28	C15H12O5	907	Metabolic pathways;Biosynthesis of secondary metabolites;Biosynthesis of phenylpropanoids;Other	rp
VRAI	273.06772@5.883-rp	#N/A	273.068	5.883	C11H15NO5S	#N/A	#N/A	rp
VRAI	Phloretin@9.457-rp	Phloretin	274.084	9.457	C15H14O5	4624	Biosynthesis of secondary metabolites;Other	rp
VRAI	279.07095@8.997-rp	#N/A	279.071	8.997	C9H9N7O4	#N/A	#N/A	rp
VRAI	N-Coumaroyl-L-asparticacid@8.207-rp	N-Coumaroyl-L-asparticacid	279.074	8.207	C13H13NO6	#N/A	#N/A	rp
VRAI	p-Tolyl-?-D-glucuronicacid@6.55-rp	p-Tolyl-?-D-glucuronicacid	284.09	6.55	C13H16O7	#N/A	#N/A	rp
VRAI	2',3'-O-Isopropylideneuridine@6.327-rp	2',3'-O-Isopropylideneuridine	284.101	6.327	C12H16N2O6	#N/A	#N/A	rp
VRAI	Glycylprolylhydroxyproline@3.217-rp	Glycylprolylhydroxyproline	285.133	3.217	C12H19N3O5	9834569	#N/A	rp
VRAI	Phlorin@2.405-rp	Phlorin	288.085	2.405	C12H16O8	#N/A	#N/A	rp
VRAI	1,5-Anhydro-1-(2,4,6-trihydroxyphenyl)hexitol@2.182-rp	1,5-Anhydro-1-(2,4,6-trihydroxyphenyl)hexitol	288.085	2.182	C12H16O8	76962450	#N/A	rp
VRAI	Methyl2,3,4-tri-O-acetylpentopyranoside@9.038-rp	Methyl2,3,4-tri-O-acetylpentopyranoside	290.101	9.038	C12H18O8	2283246	#N/A	rp
VRAI	7-nitrobenzoxadiazole-6-aminohexanoicacid@4.583-rp	7-nitrobenzoxadiazole-6-aminohexanoicacid	294.096	4.583	C12H14N4O5	58168778	#N/A	rp
VRAI	Ac-D-His-Pro@4.492-rp	Ac-D-His-Pro	294.131	4.492	C13H18N4O4	379976	#N/A	rp
VRAI	1,4,20-pregnatrien-3-one@9.843-rp	1,4,20-pregnatrien-3-one	296.214	9.843	C21H28O	4478767	#N/A	rp
VRAI	(2E,2'E)-4,4'-(1,2-Phenylenediimino)bis(4-oxo-2-butenoicacid)@6.456-rp	(2E,2'E)-4,4'-(1,2-Phenylenediimino)bis(4-oxo-2-butenoicacid)	304.07	6.456	C14H12N2O6	#N/A	#N/A	rp
VRAI	305.02134@6.397-rp	#N/A	305.021	6.397	C11H7N5O4S	#N/A	#N/A	rp
VRAI	Z-Gly-Pro@5.885-rp	Z-Gly-Pro	306.122	5.885	C15H18N2O5	64040	#N/A	rp
VRAI	307.94329@1.336-rp	#N/A	307.943	1.336	C5HN4O10P	#N/A	#N/A	rp
VRAI	DELTA-9-CIS-TETRAHYDROCANNABINOL,(-)-@9.825-rp	DELTA-9-CIS-TETRAHYDROCANNABINOL,(-)-	314.224	9.825	C21H30O2	2872	Metabolic pathways;Biosynthesis of secondary metabolites;Other	rp
VRAI	3,7-Dihydroxy-2-(3-hydroxyphenyl)-5-chromanesulfinicacid@9.195-rp	3,7-Dihydroxy-2-(3-hydroxyphenyl)-5-chromanesulfinicacid	322.051	9.195	C15H14O6S	74852053	#N/A	rp
VRAI	327.05304@6.399-rp	#N/A	327.053	6.399	C14H10N5O3P	#N/A	#N/A	rp
VRAI	327.09604@5.838-rp	#N/A	327.096	5.838	C15H23NOP2S	#N/A	#N/A	rp
VRAI	Anisatin@6.121-rp	Anisatin	328.116	6.121	C15H20O8	103015	#N/A	rp
VRAI	335.22085@6.258-rp	#N/A	335.221	6.258	C18H29N3O3	#N/A	#N/A	rp
VRAI	1,3,4-Trihydroxy-5-[(3,4,5-trihydroxybenzoyl)oxy]cyclohexanecarboxylicacid@7.413-rp	1,3,4-Trihydroxy-5-[(3,4,5-trihydroxybenzoyl)oxy]cyclohexanecarboxylicacid	344.075	7.413	C14H16O10	111715	#N/A	rp
VRAI	5-formyl-5,6,7,8-tetrahydropteroicacid@6.419-rp	5-formyl-5,6,7,8-tetrahydropteroicacid	344.123	6.419	C15H16N6O4	198951	#N/A	rp
VRAI	346.08376@6.358-rp	#N/A	346.084	6.358	C5H14N8O10	#N/A	#N/A	rp
VRAI	S-(Formylmethyl)glutathione@6.453-rp	S-(Formylmethyl)glutathione	349.094	6.453	C12H19N3O7S	21865715	Other	rp
VRAI	Alanyl-N-[(4-nitrobenzoyl)oxy]prolinamide@6.515-rp	Alanyl-N-[(4-nitrobenzoyl)oxy]prolinamide	350.122	6.515	C15H18N4O6	8596269	#N/A	rp
VRAI	2-Amino-3-hydroxy-15-methyl-1-hexadecanesulfonicacid@15.331-rp	2-Amino-3-hydroxy-15-methyl-1-hexadecanesulfonicacid	351.245	15.331	C17H37NO4S	8596526	#N/A	rp
VRAI	368.16967@6.422-rp	#N/A	368.17	6.422	C17H20N8O2	#N/A	#N/A	rp
VRAI	376.11256@3.477-rp	#N/A	376.113	3.477	C23H20O3S	#N/A	#N/A	rp
VRAI	377.15845@6.656-rp	#N/A	377.158	6.656	C16H28NO7P	#N/A	#N/A	rp
VRAI	12-Deoxyaklanonicacid@9.917-rp	12-Deoxyaklanonicacid	382.105	9.917	C21H18O7	31150751	Metabolic pathways;Biosynthesis of secondary metabolites;Other	rp
VRAI	1-O-acetyl-alpha-maltose@1.969-rp	1-O-acetyl-alpha-maltose	384.128	1.969	C14H24O12	9064377	#N/A	rp
VRAI	1-O-[3-(2,4-Dihydroxy-3-methoxyphenyl)propanoyl]hexopyranuronicacid@6.493-rp	1-O-[3-(2,4-Dihydroxy-3-methoxyphenyl)propanoyl]hexopyranuronicacid	388.101	6.493	C16H20O11	74886670	#N/A	rp
VRAI	5-(3',4'-Dihydroxyphenyl)-gamma-valerolactone-3'-O-methyl-4'-O-glucuronide@7.384-rp	5-(3',4'-Dihydroxyphenyl)-gamma-valerolactone-3'-O-methyl-4'-O-glucuronide	398.123	7.384	C18H22O10	4777172	#N/A	rp
VRAI	4-(1H-indol-3-yl)butanoicacid[2-(4-amino-1,3-dimethyl-2,6-dioxo-5-pyrimidinyl)-2-oxoethyl]ester@8.605-rp	4-(1H-indol-3-yl)butanoicacid[2-(4-amino-1,3-dimethyl-2,6-dioxo-5-pyrimidinyl)-2-oxoethyl]ester	398.158	8.605	C20H22N4O5	1768292	#N/A	rp
VRAI	ReserpicAcid@10.333-rp	ReserpicAcid	400.199	10.333	C22H28N2O5	59170	#N/A	rp
VRAI	404.09575@6.435-rp	#N/A	404.096	6.435	C16H20O12	#N/A	#N/A	rp
VRAI	406.15974@5.786-rp	#N/A	406.16	5.786	C16H26N2O10	#N/A	#N/A	rp
VRAI	Khelloside@9.273-rp	Khelloside	408.106	9.273	C19H20O10	#N/A	#N/A	rp
VRAI	PatientosideA@6.425-rp	PatientosideA	412.091	6.425	C19H21ClO8	#N/A	#N/A	rp
VRAI	(3R)-3-[(3R,5S)-7-Oxo-4-oxa-1-azabicyclo[3.2.0]hept-3-yl]seryl-(3S)-3-[(3R,5S)-7-oxo-4-oxa-1-azabicyclo[3.2.0]hept-3-yl]serine@1.629-rp	(3R)-3-[(3R,5S)-7-Oxo-4-oxa-1-azabicyclo[3.2.0]hept-3-yl]seryl-(3S)-3-[(3R,5S)-7-oxo-4-oxa-1-azabicyclo[3.2.0]hept-3-yl]serine	414.138	1.629	C16H22N4O9	4197505	ABC transporters	rp
VRAI	N-Acetyl-6-(benzyloxy)-9-(beta-D-ribofuranosyl)-9H-purin-2-amine@6.497-rp	N-Acetyl-6-(benzyloxy)-9-(beta-D-ribofuranosyl)-9H-purin-2-amine	415.148	6.497	C19H21N5O6	117986	#N/A	rp
VRAI	418.11168@6.487-rp	#N/A	418.112	6.487	C17H22O12	#N/A	#N/A	rp
VRAI	AloinB@9.844-rp	AloinB	418.127	9.844	C21H22O9	14269	#N/A	rp
VRAI	AloinA@9.92-rp	AloinA	418.127	9.92	C21H22O9	#N/A	#N/A	rp
VRAI	Liquiritin@9.741-rp	Liquiritin	418.127	9.741	C21H22O9	439855	#N/A	rp
VRAI	418.18455@4.939-rp	#N/A	418.185	4.939	C14H37N4O2P3S	#N/A	#N/A	rp
VRAI	4-(1-Carboxyethyl)-3-hydroxy-2-(3-methyl-2-buten-1-yl)phenylhexopyranosiduronicacid@9.462-rp	4-(1-Carboxyethyl)-3-hydroxy-2-(3-methyl-2-buten-1-yl)phenylhexopyranosiduronicacid	426.153	9.462	C20H26O10	74886737	#N/A	rp
VRAI	Prunin@7.591-rp	Prunin	434.122	7.591	C21H22O10	83766	Other	rp
VRAI	Naringenin-7-glucoside@7.857-rp	Naringenin-7-glucoside	434.122	7.857	C21H22O10	8086418	Other	rp
VRAI	434.17866@2.501-rp	#N/A	434.179	2.501	C12H32N6O7P2	#N/A	#N/A	rp
VRAI	1,3-dimethyl-8-(3-methyl-1-piperidinyl)-7-[2-[(5-methyl-1,3,4-thiadiazol-2-yl)thio]ethyl]purine-2,6-dione@9.933-rp	1,3-dimethyl-8-(3-methyl-1-piperidinyl)-7-[2-[(5-methyl-1,3,4-thiadiazol-2-yl)thio]ethyl]purine-2,6-dione	435.152	9.933	C18H25N7O2S2	4227488	#N/A	rp
VRAI	Swertianolin@1.163-rp	Swertianolin	436.099	1.163	C20H20O11	4444981	#N/A	rp
VRAI	Quercitrin@9.279-rp	Quercitrin	448.101	9.279	C21H20O11	4444112	Biosynthesis of secondary metabolites;Other	rp
VRAI	Neoastilbin@9.01-rp	Neoastilbin	450.116	9.01	C21H22O11	390877	Other	rp
VRAI	Lysidinemonophosphate@10.64-rp	Lysidinemonophosphate	451.147	10.64	C15H26N5O9P	#N/A	#N/A	rp
VRAI	452.05305@6.4-rp	#N/A	452.053	6.4	C22H18N2O3P2S	#N/A	#N/A	rp
VRAI	462.14225@4.725-rp	#N/A	462.142	4.725	C15H31N2O10PS	#N/A	#N/A	rp
VRAI	463.01066@6.391-rp	#N/A	463.011	6.391	C14H16N3O9P3	#N/A	#N/A	rp
VRAI	465.12669@9.727-rp	#N/A	465.127	9.727	C17H19N7O9	#N/A	#N/A	rp
VRAI	470.06381@6.395-rp	#N/A	470.064	6.395	C20H15N4O8P	#N/A	#N/A	rp
VRAI	470.21598@9.102-rp	#N/A	470.216	9.102	C20H26N10O4	#N/A	#N/A	rp
VRAI	474.15294@9.164-rp	#N/A	474.153	9.164	C29H22N4OS	#N/A	#N/A	rp
VRAI	3-alpha-AcetoxymaoesinA,(rel)-@9.363-rp	3-alpha-AcetoxymaoesinA,(rel)-	478.184	9.363	C24H30O10	#N/A	#N/A	rp
VRAI	BlestriareneB@10.334-rp	BlestriareneB	480.157	10.334	C30H24O6	391051	#N/A	rp
VRAI	486.19675@6.308-rp	#N/A	486.197	6.308	C19H31N6O7P	#N/A	#N/A	rp
VRAI	L-Phenylalanyl-L-seryl-L-tyrosyl-L-alanine@8.508-rp	L-Phenylalanyl-L-seryl-L-tyrosyl-L-alanine	486.211	8.508	C24H30N4O7	#N/A	#N/A	rp
VRAI	488.22669@8.379-rp	#N/A	488.227	8.379	C24H32N4O7	#N/A	#N/A	rp
VRAI	490.0973@9.134-rp	#N/A	490.097	9.134	C20H26O10S2	#N/A	#N/A	rp
VRAI	490.24012@6.398-rp	#N/A	490.24	6.398	C28H42OS3	#N/A	#N/A	rp
VRAI	1a-(Hydroxymethyl)-6-methoxy-1a,1b,2,5a,6,6a-hexahydrooxireno[4,5]cyclopenta[1,2-c]pyran-2-yl6-O-pentopyranosylhexopyranoside@6.401-rp	1a-(Hydroxymethyl)-6-methoxy-1a,1b,2,5a,6,6a-hexahydrooxireno[4,5]cyclopenta[1,2-c]pyran-2-yl6-O-pentopyranosylhexopyranoside	508.181	6.401	C21H32O14	15522238	#N/A	rp
VRAI	512.07482@6.402-rp	#N/A	512.075	6.402	C18H27O11P3	#N/A	#N/A	rp
VRAI	1,5-Anhydro-1-[3-(3,4-dihydroxybenzoyl)-2,4,6-trihydroxyphenyl]-6-O-(4-hydroxybenzoyl)hexitol@9.642-rp	1,5-Anhydro-1-[3-(3,4-dihydroxybenzoyl)-2,4,6-trihydroxyphenyl]-6-O-(4-hydroxybenzoyl)hexitol	544.12	9.642	C26H24O13	20475960	#N/A	rp
VRAI	558.14166@9.054-rp	#N/A	558.142	9.054	C25H28N4O7P2	#N/A	#N/A	rp
VRAI	{5-[(3-Acetylphenyl)amino]-4-amino-3-[(dimethylcarbamoyl)amino]-1,2-dihydroxy-3-(1-hydroxyethyl)-2-methylcyclopentyl}methyl2-hydroxy-6-methylbenzoate@9.158-rp	{5-[(3-Acetylphenyl)amino]-4-amino-3-[(dimethylcarbamoyl)amino]-1,2-dihydroxy-3-(1-hydroxyethyl)-2-methylcyclopentyl}methyl2-hydroxy-6-methylbenzoate	558.268	9.158	C28H38N4O8	366428	#N/A	rp
VRAI	560.11408@9.414-rp	#N/A	560.114	9.414	C23H24N6O7S2	#N/A	#N/A	rp
VRAI	560.12143@9.073-rp	#N/A	560.121	9.073	C14H33N4O13PS2	#N/A	#N/A	rp
VRAI	asn-asn-gln-trp@9.154-rp	asn-asn-gln-trp	560.236	9.154	C24H32N8O8	#N/A	#N/A	rp
VRAI	560.23694@9.398-rp	#N/A	560.237	9.398	C28H36N2O10	#N/A	#N/A	rp
VRAI	576.10941@9.112-rp	#N/A	576.109	9.112	C22H28N2O12S2	#N/A	#N/A	rp
VRAI	Eriocitrin@8.961-rp	Eriocitrin	596.175	8.961	C27H32O15	75327	#N/A	rp
VRAI	630.33873@12.616-rp	#N/A	630.339	12.616	C35H50O10	#N/A	#N/A	rp
VRAI	630.33892@12.86-rp	#N/A	630.339	12.86	C38H53N2P3	#N/A	#N/A	rp
VRAI	630.34108@15.683-rp	#N/A	630.341	15.683	C37H42N8O2	#N/A	#N/A	rp
VRAI	Plantamajoside@9.129-rp	Plantamajoside	640.195	9.129	C29H36O16	4445101	#N/A	rp
VRAI	N-Acetyl-O-phosphono-L-tyrosyl-L-leucyl-L-prolyl-L-glutamine@6.453-rp	N-Acetyl-O-phosphono-L-tyrosyl-L-leucyl-L-prolyl-L-glutamine	641.245	6.453	C27H40N5O11P	#N/A	#N/A	rp
VRAI	641.37016@9.386-rp	#N/A	641.37	9.386	C44H51NOS	#N/A	#N/A	rp
VRAI	Hellicoside@8.898-rp	Hellicoside	656.19	8.898	C29H36O17	#N/A	#N/A	rp
VRAI	659.10615@6.398-rp	#N/A	659.106	6.398	C29H23N7O8P2	#N/A	#N/A	rp
VRAI	662.17615@9.151-rp	#N/A	662.176	9.151	C29H33N10OP3S	#N/A	#N/A	rp
VRAI	Veratridine@5.793-rp	Veratridine	673.34	5.793	C36H51NO11	5290571	#N/A	rp
VRAI	N-acetyl-4-(N-acetylglucosaminyl)muramoyl-L-alanyl-D-isoglutamine@3.191-rp	N-acetyl-4-(N-acetylglucosaminyl)muramoyl-L-alanyl-D-isoglutamine	695.287	3.191	C27H45N5O16	390445	#N/A	rp
VRAI	5-(1-{[3-Acetamido-4,5-dihydroxy-6-(hydroxymethyl)tetrahydro-2H-pyran-2-yl]oxy}-2,3-dihydroxypropyl)-13-carbamoyl-4-formyl-7,10-dimethyl-2,8,11-trioxo-6-oxa-3,9,12-triazahexadecan-16-oicacid(non-pre ferredname)@4.586-rp	5-(1-{[3-Acetamido-4,5-dihydroxy-6-(hydroxymethyl)tetrahydro-2H-pyran-2-yl]oxy}-2,3-dihydroxypropyl)-13-carbamoyl-4-formyl-7,10-dimethyl-2,8,11-trioxo-6-oxa-3,9,12-triazahexadecan-16-oicacid(non-pre ferredname)	695.287	4.586	C27H45N5O16	10519653	#N/A	rp
VRAI	708.34429@6.301-rp	#N/A	708.344	6.301	C41H57O4PS2	#N/A	#N/A	rp
VRAI	737.29799@6.292-rp	#N/A	737.298	6.292	C21H53N7O17P2	#N/A	#N/A	rp
VRAI	N-acetyl-D-glucosaminyl-(1->4)-N-acetylmuramoyl-L-alanyl-D-glutamyl-6-carboxy-L-lysine@2.503-rp	N-acetyl-D-glucosaminyl-(1->4)-N-acetylmuramoyl-L-alanyl-D-glutamyl-6-carboxy-L-lysine	868.357	2.503	C34H56N6O20	58145599	#N/A	rp
VRAI	876.41905@5.786-rp	#N/A	876.419	5.786	C39H74O15P2S	#N/A	#N/A	rp
VRAI	910.36618@5.225-rp	#N/A	910.366	5.225	C38H63N4O17PS	#N/A	#N/A	rp
VRAI	1008.46132@5.534-rp	#N/A	1008.46	5.534	C48H74N4O15P2	#N/A	#N/A	rp
VRAI	1061.48778@5.226-rp	#N/A	1061.49	5.226	C44H82N5O18P3	#N/A	#N/A	rp
VRAI	1061.48778@5.793-rp	#N/A	1061.49	5.793	C45H86N5O13P3S2	#N/A	#N/A	rp
VRAI	1079.49871@5.795-rp	#N/A	1079.5	5.795	C45H80N9O15P3	#N/A	#N/A	rp
VRAI	1117.44604@5.797-rp	#N/A	1117.45	5.797	C43H78N9O17P3S	#N/A	#N/A	rp
VRAI	1121.50895@6.33-rp	#N/A	1121.51	6.33	C47H82N9O16P3	#N/A	#N/A	rp
VRAI	1122.37179@5.489-rp	#N/A	1122.37	5.489	C57H65N4O14P3	#N/A	#N/A	rp
VRAI	1254.41366@5.279-rp	#N/A	1254.41	5.279	C55H73N10O16P3S	#N/A	#N/A	rp
VRAI	1289.53125@6.611-rp	#N/A	1289.53	6.611	C74H86NO13P3	#N/A	#N/A	rp
VRAI	1505.62721@6.417-rp	#N/A	1505.63	6.417	C79H97N9O15P2S	#N/A	#N/A	rp
FAUX	99.99999@0.956-rp	#N/A	100	0.956	#N/A	#N/A	#N/A	rp
FAUX	100.0011@6.107-rp	#N/A	100.001	6.107	#N/A	#N/A	#N/A	rp
FAUX	100.00116@0.944-rp	#N/A	100.001	0.944	#N/A	#N/A	#N/A	rp
FAUX	Succinicanhydride@1.641-rp	Succinicanhydride	100.016	1.641	C4H4O3	7634	#N/A	rp
FAUX	100.01787@0.892-rp	#N/A	100.018	0.892	#N/A	#N/A	#N/A	rp
FAUX	100.01867@0.891-rp	#N/A	100.019	0.891	#N/A	#N/A	#N/A	rp
FAUX	100.05167@1.134-rp	#N/A	100.052	1.134	#N/A	#N/A	#N/A	rp
FAUX	4-pentenoicacid@1.13-rp	4-pentenoicacid	100.052	1.13	C5H8O2	#N/A	Other	rp
FAUX	NPYR@1.114-rp	NPYR	100.064	1.114	C4H8N2O	13002	#N/A	rp
FAUX	101.00421@0.956-rp	#N/A	101.004	0.956	#N/A	#N/A	#N/A	rp
FAUX	Carboxycyclopropylamine@1.134-rp	Carboxycyclopropylamine	101.048	1.134	C4H7NO2	#N/A	Metabolic pathways;Biosynthesis of secondary metabolites;Biosynthesis of plant secondary metabolites;Other	rp
FAUX	101.04888@1.324-rp	#N/A	101.049	1.324	#N/A	#N/A	#N/A	rp
FAUX	101.08325@1.08-rp	#N/A	101.083	1.08	#N/A	#N/A	#N/A	rp
FAUX	2-methylbutanaloxime@1.086-rp	2-methylbutanaloxime	101.084	1.086	C5H11NO	2291455	Metabolic pathways;Biosynthesis of secondary metabolites;Microbial metabolism in diverse environments;2-Oxocarboxylic acid metabolism;Other	rp
FAUX	101.96098@0.95-rp	#N/A	101.961	0.95	#N/A	#N/A	#N/A	rp
FAUX	101.99862@0.947-rp	#N/A	101.999	0.947	C2H3N2OP	#N/A	#N/A	rp
FAUX	2-methyl-3-oxopropanoicacid@1.515-rp	2-methyl-3-oxopropanoicacid	102.032	1.515	C4H6O3	#N/A	Metabolic pathways;Biosynthesis of secondary metabolites;Microbial metabolism in diverse environments;2-Oxocarboxylic acid metabolism;Biosynthesis of amino acids;Tyrosine metabolism;Other	rp
FAUX	2-methyl-3-oxopropanoicacid@1.132-rp	2-methyl-3-oxopropanoicacid	102.032	1.132	C4H6O3	#N/A	Metabolic pathways;Biosynthesis of secondary metabolites;Microbial metabolism in diverse environments;2-Oxocarboxylic acid metabolism;Biosynthesis of amino acids;Tyrosine metabolism;Other	rp
FAUX	Phenylacetylene@1.992-rp	Phenylacetylene	102.047	1.992	C8H6	10364	#N/A	rp
FAUX	103.01068@1.065-rp	#N/A	103.011	1.065	#N/A	#N/A	#N/A	rp
FAUX	Thiomorpholine@4.558-rp	Thiomorpholine	103.045	4.558	C4H9NS	60509	#N/A	rp
FAUX	Thiomorpholine@1.309-rp	Thiomorpholine	103.046	1.309	C4H9NS	60509	#N/A	rp
FAUX	2-aminobutyricacid@1.089-rp	2-aminobutyricacid	103.063	1.089	C4H9NO2	#N/A	Metabolic pathways;Microbial metabolism in diverse environments;Arginine and proline metabolism;Other	rp
FAUX	103.0706@1.103-rp	#N/A	103.071	1.103	#N/A	#N/A	#N/A	rp
FAUX	Choline@1.093-rp	Choline	103.1	1.093	C5H13NO	#N/A	#N/A	rp
FAUX	103.98509@1.035-rp	#N/A	103.985	1.035	#N/A	#N/A	#N/A	rp
FAUX	2-hydroxy-3-oxopropanoicacid@1.152-rp	2-hydroxy-3-oxopropanoicacid	104.011	1.152	C3H4O4	#N/A	Metabolic pathways;Biosynthesis of secondary metabolites;Microbial metabolism in diverse environments;Other	rp
FAUX	2-hydroxy-3-oxopropanoicacid@1.31-rp	2-hydroxy-3-oxopropanoicacid	104.011	1.31	C3H4O4	#N/A	Metabolic pathways;Biosynthesis of secondary metabolites;Microbial metabolism in diverse environments;Other	rp
FAUX	2-hydroxybutyricacid@1.655-rp	2-hydroxybutyricacid	104.047	1.655	C4H8O3	#N/A	Metabolic pathways;Microbial metabolism in diverse environments;Other	rp
FAUX	2-hydroxybutyricacid@3.476-rp	2-hydroxybutyricacid	104.047	3.476	C4H8O3	#N/A	Metabolic pathways;Microbial metabolism in diverse environments;Other	rp
FAUX	104.05969@1.51-rp	#N/A	104.06	1.51	#N/A	#N/A	#N/A	rp
FAUX	2-(Methylthio)acetamide@1.574-rp	2-(Methylthio)acetamide	105.025	1.574	C3H7NOS	476846	#N/A	rp
FAUX	Serine@1.101-rp	Serine	105.043	1.101	C3H7NO3	#N/A	Metabolic pathways;Biosynthesis of secondary metabolites;Microbial metabolism in diverse environments;Biosynthesis of plant secondary metabolites;Biosynthesis of amino acids;ABC transporters;Other	rp
FAUX	105.05487@4.764-rp	#N/A	105.055	4.764	#N/A	#N/A	#N/A	rp
FAUX	4-Vinylpyridine@4.755-rp	4-Vinylpyridine	105.057	4.755	C7H7N	7221	#N/A	rp
FAUX	MFCD00084180@1.083-rp	MFCD00084180	105.069	1.083	C8H7D	10431536	#N/A	rp
FAUX	Glycericacid@1.17-rp	Glycericacid	106.027	1.17	C3H6O4	#N/A	Metabolic pathways;Biosynthesis of secondary metabolites;Microbial metabolism in diverse environments;Other	rp
FAUX	Benzaldehyde@8.678-rp	Benzaldehyde	106.042	8.678	C7H6O	235	Metabolic pathways;Microbial metabolism in diverse environments;Degradation of aromatic compounds;Aminobenzoate degradation;Other	rp
FAUX	Benzaldehyde@10.153-rp	Benzaldehyde	106.042	10.153	C7H6O	235	Metabolic pathways;Microbial metabolism in diverse environments;Degradation of aromatic compounds;Aminobenzoate degradation;Other	rp
FAUX	Benzaldehyde@6.811-rp	Benzaldehyde	106.042	6.811	C7H6O	235	Metabolic pathways;Microbial metabolism in diverse environments;Degradation of aromatic compounds;Aminobenzoate degradation;Other	rp
FAUX	Benzaldehyde@7.162-rp	Benzaldehyde	106.042	7.162	C7H6O	235	Metabolic pathways;Microbial metabolism in diverse environments;Degradation of aromatic compounds;Aminobenzoate degradation;Other	rp
FAUX	Benzaldehyde@1.995-rp	Benzaldehyde	106.042	1.995	C7H6O	235	Metabolic pathways;Microbial metabolism in diverse environments;Degradation of aromatic compounds;Aminobenzoate degradation;Other	rp
FAUX	Benzaldehyde@8.392-rp	Benzaldehyde	106.042	8.392	C7H6O	235	Metabolic pathways;Microbial metabolism in diverse environments;Degradation of aromatic compounds;Aminobenzoate degradation;Other	rp
FAUX	106.05809@1.1-rp	#N/A	106.058	1.1	#N/A	#N/A	#N/A	rp
FAUX	106.07715@13.96-rp	#N/A	106.077	13.96	#N/A	#N/A	#N/A	rp
FAUX	106.07724@14.4-rp	#N/A	106.077	14.4	#N/A	#N/A	#N/A	rp
FAUX	Ethylbenzene@14.401-rp	Ethylbenzene	106.078	14.401	C8H10	7219	Metabolic pathways;Microbial metabolism in diverse environments;Degradation of aromatic compounds;Other	rp
FAUX	Ethylbenzene@13.437-rp	Ethylbenzene	106.078	13.437	C8H10	7219	Metabolic pathways;Microbial metabolism in diverse environments;Degradation of aromatic compounds;Other	rp
FAUX	Ethylbenzene@13.959-rp	Ethylbenzene	106.078	13.959	C8H10	7219	Metabolic pathways;Microbial metabolism in diverse environments;Degradation of aromatic compounds;Other	rp
FAUX	106.592@7.21-rp	#N/A	106.592	7.21	#N/A	#N/A	#N/A	rp
FAUX	107.56355@1.098-rp	#N/A	107.564	1.098	#N/A	#N/A	#N/A	rp
FAUX	Vinylsulfonicacid@1.185-rp	Vinylsulfonicacid	107.988	1.185	C2H4O3S	56254	#N/A	rp
FAUX	benzoquinone@1.131-rp	benzoquinone	108.021	1.131	C6H4O2	4489	Microbial metabolism in diverse environments;Aminobenzoate degradation	rp
FAUX	benzoquinone@1.517-rp	benzoquinone	108.021	1.517	C6H4O2	4489	Microbial metabolism in diverse environments;Aminobenzoate degradation	rp
FAUX	(1Z,5Z)-1,5-Cyclooctadiene@15.525-rp	(1Z,5Z)-1,5-Cyclooctadiene	108.094	15.525	C8H12	74815	#N/A	rp
FAUX	2-aminophenol@1.346-rp	2-aminophenol	109.053	1.346	C6H7NO	#N/A	Metabolic pathways;Microbial metabolism in diverse environments;Tryptophan metabolism;Aminobenzoate degradation	rp
FAUX	109.06343@1.088-rp	#N/A	109.063	1.088	#N/A	#N/A	#N/A	rp
FAUX	3,4-Diaminopyridine@6.634-rp	3,4-Diaminopyridine	109.064	6.634	C5H7N3	5705	#N/A	rp
FAUX	3,4-Diaminopyridine@1.084-rp	3,4-Diaminopyridine	109.064	1.084	C5H7N3	5705	#N/A	rp
FAUX	109.96811@1.361-rp	#N/A	109.968	1.361	CH4O2P2	#N/A	#N/A	rp
FAUX	110.02166@1.355-rp	#N/A	110.022	1.355	C2H6O5	#N/A	#N/A	rp
FAUX	5-methyl-2-furfural@1.148-rp	5-methyl-2-furfural	110.037	1.148	C6H6O2	#N/A	Metabolic pathways;Microbial metabolism in diverse environments;Degradation of aromatic compounds;Tyrosine metabolism;Aminobenzoate degradation;Other	rp
FAUX	Imidazole-4-acetaldehyde@1.787-rp	Imidazole-4-acetaldehyde	110.048	1.787	C5H6N2O	132948	Metabolic pathways;Other	rp
FAUX	Imidazole-4-acetaldehyde@1.096-rp	Imidazole-4-acetaldehyde	110.048	1.096	C5H6N2O	132948	Metabolic pathways;Other	rp
FAUX	4,4-Dimethyl-1-hexyne@17.812-rp	4,4-Dimethyl-1-hexyne	110.109	17.812	C8H14	461263	#N/A	rp
FAUX	2,5-dihydroxypyridine@1.342-rp	2,5-dihydroxypyridine	111.032	1.342	C5H5NO2	#N/A	Metabolic pathways;Microbial metabolism in diverse environments;Arginine and proline metabolism;Other	rp
FAUX	111.04236@1.149-rp	#N/A	111.042	1.149	#N/A	#N/A	#N/A	rp
FAUX	111.04246@1.286-rp	#N/A	111.042	1.286	#N/A	#N/A	#N/A	rp
FAUX	Cytosine@1.28-rp	Cytosine	111.043	1.28	C4H5N3O	577	Metabolic pathways;Other	rp
FAUX	Cytosine@1.13-rp	Cytosine	111.043	1.13	C4H5N3O	577	Metabolic pathways;Other	rp
FAUX	Cytosine@1.516-rp	Cytosine	111.043	1.516	C4H5N3O	577	Metabolic pathways;Other	rp
FAUX	111.04387@1.275-rp	#N/A	111.044	1.275	#N/A	#N/A	Metabolic pathways;Other	rp
FAUX	111.05018@1.26-rp	#N/A	111.05	1.26	#N/A	#N/A	#N/A	rp
FAUX	pyrrolizidine@7.091-rp	pyrrolizidine	111.105	7.091	C7H13N	12039	#N/A	rp
FAUX	pyrrolizidine@6.545-rp	pyrrolizidine	111.105	6.545	C7H13N	12039	#N/A	rp
FAUX	pyrrolizidine@7.521-rp	pyrrolizidine	111.105	7.521	C7H13N	12039	#N/A	rp
FAUX	Methylbisulfate@1.16-rp	Methylbisulfate	111.983	1.16	CH4O4S	6172	#N/A	rp
FAUX	Hydroxymethylphosphonicacid@1.187-rp	Hydroxymethylphosphonicacid	111.993	1.187	CH5O4P	#N/A	Biosynthesis of secondary metabolites;Other	rp
FAUX	112.00109@1.36-rp	#N/A	112.001	1.36	CH4O6	#N/A	#N/A	rp
FAUX	2-furoicacid@1.069-rp	2-furoicacid	112.016	1.069	C5H4O3	#N/A	Metabolic pathways;Microbial metabolism in diverse environments;Other	rp
FAUX	2-furoicacid@1.545-rp	2-furoicacid	112.016	1.545	C5H4O3	#N/A	Metabolic pathways;Microbial metabolism in diverse environments;Other	rp
FAUX	2-furoicacid@1.316-rp	2-furoicacid	112.016	1.316	C5H4O3	#N/A	Metabolic pathways;Microbial metabolism in diverse environments;Other	rp
FAUX	Uracil@3.223-rp	Uracil	112.027	3.223	C4H4N2O2	1141	Metabolic pathways;Other	rp
FAUX	Uracil@1.807-rp	Uracil	112.027	1.807	C4H4N2O2	1141	Metabolic pathways;Other	rp
FAUX	Uracil@2.412-rp	Uracil	112.027	2.412	C4H4N2O2	1141	Metabolic pathways;Other	rp
FAUX	Uracil@1.64-rp	Uracil	112.027	1.64	C4H4N2O2	1141	Metabolic pathways;Other	rp
FAUX	Uracil@1.546-rp	Uracil	112.027	1.546	C4H4N2O2	1141	Metabolic pathways;Other	rp
FAUX	112.04503@1.106-rp	#N/A	112.045	1.106	#N/A	#N/A	#N/A	rp
FAUX	112.05166@1.75-rp	#N/A	112.052	1.75	#N/A	#N/A	#N/A	rp
FAUX	Imidazole-2-methanol,1-methyl-@1.127-rp	Imidazole-2-methanol,1-methyl-	112.064	1.127	C5H8N2O	498730	#N/A	rp
FAUX	Hydrogensulfurothioate@1.009-rp	Hydrogensulfurothioate	112.937	1.009	HO3S2	112063	Metabolic pathways;Microbial metabolism in diverse environments;ABC transporters;Other	rp
FAUX	XJ4375000@4.756-rp	XJ4375000	113.03	4.756	C5H7NS	10470	#N/A	rp
FAUX	1-pyrroline-2-carboxylicacid@1.678-rp	1-pyrroline-2-carboxylicacid	113.048	1.678	C5H7NO2	#N/A	Metabolic pathways;Biosynthesis of secondary metabolites;Biosynthesis of amino acids;Arginine and proline metabolism;Other	rp
FAUX	1-pyrroline-2-carboxylicacid@1.186-rp	1-pyrroline-2-carboxylicacid	113.048	1.186	C5H7NO2	#N/A	Metabolic pathways;Biosynthesis of secondary metabolites;Biosynthesis of amino acids;Arginine and proline metabolism;Other	rp
FAUX	113.08328@1.179-rp	#N/A	113.083	1.179	#N/A	#N/A	#N/A	rp
FAUX	e-Caprolactam@1.164-rp	e-Caprolactam	113.084	1.164	C6H11NO	#N/A	Metabolic pathways;Microbial metabolism in diverse environments;Other	rp
FAUX	113.58168@6.478-rp	#N/A	113.582	6.478	#N/A	#N/A	#N/A	rp
FAUX	113.58173@6.665-rp	#N/A	113.582	6.665	#N/A	#N/A	#N/A	rp
FAUX	113.58743@7.16-rp	#N/A	113.587	7.16	#N/A	#N/A	#N/A	rp
FAUX	Thiosulficacid@1.006-rp	Thiosulficacid	113.945	1.006	H2O3S2	22886	#N/A	rp
FAUX	Thiosulficacid@1.48-rp	Thiosulficacid	113.945	1.48	H2O3S2	22886	#N/A	rp
FAUX	Peroxymonosulfuricacid@1.188-rp	Peroxymonosulfuricacid	113.962	1.188	H2O5S	2035480	#N/A	rp
FAUX	2-hydroxy-2,4-pentadienoate@1.18-rp	2-hydroxy-2,4-pentadienoate	114.032	1.18	C5H6O3	#N/A	Metabolic pathways;Microbial metabolism in diverse environments;Degradation of aromatic compounds;Phenylalanine metabolism;Other	rp
FAUX	2-hydroxy-2,4-pentadienoate@7.943-rp	2-hydroxy-2,4-pentadienoate	114.032	7.943	C5H6O3	#N/A	Metabolic pathways;Microbial metabolism in diverse environments;Degradation of aromatic compounds;Phenylalanine metabolism;Other	rp
FAUX	2-hydroxy-2,4-pentadienoate@8.77-rp	2-hydroxy-2,4-pentadienoate	114.032	8.77	C5H6O3	#N/A	Metabolic pathways;Microbial metabolism in diverse environments;Degradation of aromatic compounds;Phenylalanine metabolism;Other	rp
FAUX	2-hydroxy-2,4-pentadienoate@1.519-rp	2-hydroxy-2,4-pentadienoate	114.032	1.519	C5H6O3	#N/A	Metabolic pathways;Microbial metabolism in diverse environments;Degradation of aromatic compounds;Phenylalanine metabolism;Other	rp
FAUX	2-hydroxy-2,4-pentadienoate@2.118-rp	2-hydroxy-2,4-pentadienoate	114.032	2.118	C5H6O3	#N/A	Metabolic pathways;Microbial metabolism in diverse environments;Degradation of aromatic compounds;Phenylalanine metabolism;Other	rp
FAUX	Beta-cyanoalanine@1.55-rp	Beta-cyanoalanine	114.043	1.55	C4H6N2O2	#N/A	Metabolic pathways;Biosynthesis of secondary metabolites;Arginine and proline metabolism;Other	rp
FAUX	1H-Inden-1-ylidene@3.147-rp	1H-Inden-1-ylidene	114.047	3.147	C9H6	4590640	#N/A	rp
FAUX	1-Nitrosopiperidine@0.996-rp	1-Nitrosopiperidine	114.079	0.996	C5H10N2O	7245	#N/A	rp
FAUX	1-Nitrosopiperidine@1.091-rp	1-Nitrosopiperidine	114.079	1.091	C5H10N2O	7245	#N/A	rp
FAUX	114.57134@1.106-rp	#N/A	114.571	1.106	#N/A	#N/A	#N/A	rp
FAUX	114.57137@6.448-rp	#N/A	114.571	6.448	#N/A	#N/A	#N/A	rp
FAUX	Maleamicacid@1.11-rp	Maleamicacid	115.027	1.11	C4H5NO3	4444106	Metabolic pathways;Microbial metabolism in diverse environments;Other	rp
FAUX	115.02803@1.109-rp	#N/A	115.028	1.109	#N/A	#N/A	#N/A	rp
FAUX	1-Amino-2,4-imidazolidinedione@1.2-rp	1-Amino-2,4-imidazolidinedione	115.038	1.2	C3H5N3O2	65659	#N/A	rp
FAUX	Butylisothiocyanate@21.926-rp	Butylisothiocyanate	115.046	21.926	C5H9NS	11124	#N/A	rp
FAUX	Proline@0.991-rp	Proline	115.063	0.991	C5H9NO2	#N/A	Metabolic pathways;Biosynthesis of secondary metabolites;Biosynthesis of amino acids;ABC transporters;Arginine and proline metabolism;Other	rp
FAUX	Proline@1.162-rp	Proline	115.063	1.162	C5H9NO2	#N/A	Metabolic pathways;Biosynthesis of secondary metabolites;Biosynthesis of amino acids;ABC transporters;Arginine and proline metabolism;Other	rp
FAUX	Proline@1.768-rp	Proline	115.063	1.768	C5H9NO2	#N/A	Metabolic pathways;Biosynthesis of secondary metabolites;Biosynthesis of amino acids;ABC transporters;Arginine and proline metabolism;Other	rp
FAUX	L-Proline@3.706-rp	L-Proline	115.063	3.706	C5H9NO2	128566	Metabolic pathways;Biosynthesis of secondary metabolites;Biosynthesis of amino acids;ABC transporters;Arginine and proline metabolism;Other	rp
FAUX	115.06456@1.75-rp	#N/A	115.065	1.75	#N/A	#N/A	#N/A	rp
FAUX	115.09882@1.113-rp	#N/A	115.099	1.113	#N/A	#N/A	#N/A	rp
FAUX	n-Hexanamide@1.184-rp	n-Hexanamide	115.1	1.184	C6H13NO	11827	#N/A	rp
FAUX	115.97861@6.156-rp	#N/A	115.979	6.156	#N/A	#N/A	#N/A	rp
FAUX	115.97869@0.951-rp	#N/A	115.979	0.951	#N/A	#N/A	#N/A	rp
FAUX	Fumaricacid@1.11-rp	Fumaricacid	116.011	1.11	C4H4O4	10197150	Metabolic pathways;Biosynthesis of secondary metabolites;Microbial metabolism in diverse environments;Biosynthesis of plant secondary metabolites;Degradation of aromatic compounds;Biosynthesis of phenylpropanoids;Biosynthesis of alkaloids derived from shikimate pathway;Phenylalanine metabolism;Tyrosine metabolism;Other	rp
FAUX	Fumaricacid@1.63-rp	Fumaricacid	116.011	1.63	C4H4O4	10197150	Metabolic pathways;Biosynthesis of secondary metabolites;Microbial metabolism in diverse environments;Biosynthesis of plant secondary metabolites;Degradation of aromatic compounds;Biosynthesis of phenylpropanoids;Biosynthesis of alkaloids derived from shikimate pathway;Phenylalanine metabolism;Tyrosine metabolism;Other	rp
FAUX	Fumaricacid@1.266-rp	Fumaricacid	116.011	1.266	C4H4O4	10197150	Metabolic pathways;Biosynthesis of secondary metabolites;Microbial metabolism in diverse environments;Biosynthesis of plant secondary metabolites;Degradation of aromatic compounds;Biosynthesis of phenylpropanoids;Biosynthesis of alkaloids derived from shikimate pathway;Phenylalanine metabolism;Tyrosine metabolism;Other	rp
FAUX	2-oxovalericacid@1.179-rp	2-oxovalericacid	116.047	1.179	C5H8O3	#N/A	Metabolic pathways;Biosynthesis of secondary metabolites;Microbial metabolism in diverse environments;2-Oxocarboxylic acid metabolism;Biosynthesis of amino acids;Other	rp
FAUX	116.04981@3.146-rp	#N/A	116.05	3.146	C4H9N2P	#N/A	#N/A	rp
FAUX	116.06045@1.153-rp	#N/A	116.06	1.153	#N/A	#N/A	#N/A	rp
FAUX	1,2-cyclohexanediol@10.179-rp	1,2-cyclohexanediol	116.084	10.179	C6H12O2	#N/A	Microbial metabolism in diverse environments;Other	rp
FAUX	116.56882@0.984-rp	#N/A	116.569	0.984	#N/A	#N/A	#N/A	rp
FAUX	117.02758@0.938-rp	#N/A	117.028	0.938	#N/A	#N/A	#N/A	rp
FAUX	117.02847@0.943-rp	#N/A	117.028	0.943	CH3N5O2	#N/A	#N/A	rp
FAUX	2-amino-3-oxobutanoicacid@1.415-rp	2-amino-3-oxobutanoicacid	117.043	1.415	C4H7NO3	#N/A	Metabolic pathways;Biosynthesis of secondary metabolites;Microbial metabolism in diverse environments;2-Oxocarboxylic acid metabolism;Biosynthesis of amino acids;Arginine and proline metabolism;Other	rp
FAUX	Phenylacetonitrile@15.519-rp	Phenylacetonitrile	117.058	15.519	C8H7N	#N/A	Metabolic pathways;Biosynthesis of secondary metabolites;Microbial metabolism in diverse environments;Tryptophan metabolism;Other	rp
FAUX	Phenylacetonitrile@17.811-rp	Phenylacetonitrile	117.058	17.811	C8H7N	#N/A	Metabolic pathways;Biosynthesis of secondary metabolites;Microbial metabolism in diverse environments;Tryptophan metabolism;Other	rp
FAUX	Phenylacetonitrile@1.995-rp	Phenylacetonitrile	117.058	1.995	C8H7N	#N/A	Metabolic pathways;Biosynthesis of secondary metabolites;Microbial metabolism in diverse environments;Tryptophan metabolism;Other	rp
FAUX	Phenylacetonitrile@3.149-rp	Phenylacetonitrile	117.058	3.149	C8H7N	#N/A	Metabolic pathways;Biosynthesis of secondary metabolites;Microbial metabolism in diverse environments;Tryptophan metabolism;Other	rp
FAUX	Phenylacetonitrile@1.55-rp	Phenylacetonitrile	117.058	1.55	C8H7N	#N/A	Metabolic pathways;Biosynthesis of secondary metabolites;Microbial metabolism in diverse environments;Tryptophan metabolism;Other	rp
FAUX	Phenylacetonitrile@5.376-rp	Phenylacetonitrile	117.058	5.376	C8H7N	#N/A	Metabolic pathways;Biosynthesis of secondary metabolites;Microbial metabolism in diverse environments;Tryptophan metabolism;Other	rp
FAUX	4-methylaminobutyricacid@1.194-rp	4-methylaminobutyricacid	117.079	1.194	C5H11NO2	63869	Metabolic pathways;Biosynthesis of secondary metabolites;Microbial metabolism in diverse environments;Biosynthesis of plant secondary metabolites;2-Oxocarboxylic acid metabolism;Biosynthesis of amino acids;Biosynthesis of alkaloids derived from shikimate pathway;ABC transporters;Arginine and proline metabolism;Other	rp
FAUX	4-methylaminobutyricacid@2.68-rp	4-methylaminobutyricacid	117.079	2.68	C5H11NO2	63869	Metabolic pathways;Biosynthesis of secondary metabolites;Microbial metabolism in diverse environments;Biosynthesis of plant secondary metabolites;2-Oxocarboxylic acid metabolism;Biosynthesis of amino acids;Biosynthesis of alkaloids derived from shikimate pathway;ABC transporters;Arginine and proline metabolism;Other	rp
FAUX	117.08025@1.224-rp	#N/A	117.08	1.224	#N/A	#N/A	#N/A	rp
FAUX	117.57163@4.915-rp	#N/A	117.572	4.915	#N/A	#N/A	#N/A	rp
FAUX	117.57167@6.657-rp	#N/A	117.572	6.657	#N/A	#N/A	#N/A	rp
FAUX	1-Chloro-1,2,2-trifluoroethane@1.05-rp	1-Chloro-1,2,2-trifluoroethane	117.98	1.05	C2H2ClF3	83736	#N/A	rp
FAUX	118.01167@6.108-rp	#N/A	118.012	6.108	#N/A	#N/A	#N/A	rp
FAUX	118.01169@0.944-rp	#N/A	118.012	0.944	#N/A	#N/A	#N/A	rp
FAUX	2-ethoxy-2-oxoaceticacid@1.639-rp	2-ethoxy-2-oxoaceticacid	118.027	1.639	C4H6O4	#N/A	Metabolic pathways;Biosynthesis of secondary metabolites;Microbial metabolism in diverse environments;Biosynthesis of plant secondary metabolites;Degradation of aromatic compounds;Biosynthesis of phenylpropanoids;Biosynthesis of alkaloids derived from shikimate pathway;Phenylalanine metabolism;Tyrosine metabolism;Other	rp
FAUX	4,5-Dicyanoimidazole@2.241-rp	4,5-Dicyanoimidazole	118.028	2.241	C5H2N4	63894	#N/A	rp
FAUX	Coumarone@7.015-rp	Coumarone	118.042	7.015	C8H6O	8868	#N/A	rp
FAUX	Coumarone@8.556-rp	Coumarone	118.042	8.556	C8H6O	8868	#N/A	rp
FAUX	Coumarone@9.083-rp	Coumarone	118.042	9.083	C8H6O	8868	#N/A	rp
FAUX	Coumarone@4.409-rp	Coumarone	118.042	4.409	C8H6O	8868	#N/A	rp
FAUX	Coumarone@1.546-rp	Coumarone	118.042	1.546	C8H6O	8868	#N/A	rp
FAUX	Coumarone@8.75-rp	Coumarone	118.042	8.75	C8H6O	8868	#N/A	rp
FAUX	2-hydroxy-2-methylbutyricacid@2.594-rp	2-hydroxy-2-methylbutyricacid	118.063	2.594	C5H10O3	#N/A	Metabolic pathways;Other	rp
FAUX	119.01247@0.944-rp	#N/A	119.012	0.944	C5HN3O	#N/A	#N/A	rp
FAUX	119.01247@6.112-rp	#N/A	119.012	6.112	C5HN3O	#N/A	#N/A	rp
FAUX	Benzoxazole@4.465-rp	Benzoxazole	119.037	4.465	C7H5NO	8873	#N/A	rp
FAUX	119.05341@1.093-rp	#N/A	119.053	1.093	#N/A	#N/A	#N/A	rp
FAUX	119.05697@1.094-rp	#N/A	119.057	1.094	#N/A	#N/A	#N/A	rp
FAUX	2-methylserine@1.567-rp	2-methylserine	119.058	1.567	C4H9NO3	#N/A	Metabolic pathways;Biosynthesis of secondary metabolites;Microbial metabolism in diverse environments;Biosynthesis of plant secondary metabolites;Biosynthesis of amino acids;ABC transporters;Other	rp
FAUX	2-methylserine@1.106-rp	2-methylserine	119.058	1.106	C4H9NO3	#N/A	Metabolic pathways;Biosynthesis of secondary metabolites;Microbial metabolism in diverse environments;Biosynthesis of plant secondary metabolites;Biosynthesis of amino acids;ABC transporters;Other	rp
FAUX	119.05939@1.114-rp	#N/A	119.059	1.114	#N/A	#N/A	#N/A	rp
FAUX	Indoline@3.458-rp	Indoline	119.073	3.458	C8H9N	9905	#N/A	rp
FAUX	Indoline@6.546-rp	Indoline	119.073	6.546	C8H9N	9905	#N/A	rp
FAUX	Indoline@8.195-rp	Indoline	119.074	8.195	C8H9N	9905	#N/A	rp
FAUX	Indoline@7.174-rp	Indoline	119.074	7.174	C8H9N	9905	#N/A	rp
FAUX	Indoline@4.54-rp	Indoline	119.074	4.54	C8H9N	9905	#N/A	rp
FAUX	Indoline@7.007-rp	Indoline	119.074	7.007	C8H9N	9905	#N/A	rp
FAUX	Indoline@1.996-rp	Indoline	119.074	1.996	C8H9N	9905	#N/A	rp
FAUX	506020@1.072-rp	506020	119.095	1.072	C5H13NO2	70742	#N/A	rp
FAUX	119.94945@1.014-rp	#N/A	119.949	1.014	#N/A	#N/A	#N/A	rp
FAUX	119.95899@1.038-rp	#N/A	119.959	1.038	#N/A	#N/A	#N/A	rp
FAUX	119.97149@0.956-rp	#N/A	119.971	0.956	#N/A	#N/A	#N/A	rp
FAUX	120.00482@1.065-rp	#N/A	120.005	1.065	#N/A	#N/A	#N/A	rp
FAUX	120.00921@0.942-rp	#N/A	120.009	0.942	C2H5N2O2P	#N/A	#N/A	rp
FAUX	6-(Oxomethylene)-2,4-cyclohexadien-1-one@4.343-rp	6-(Oxomethylene)-2,4-cyclohexadien-1-one	120.021	4.343	C7H4O2	392562	#N/A	rp
FAUX	120.03174@1.54-rp	#N/A	120.032	1.54	#N/A	#N/A	#N/A	rp
FAUX	2-hydroxynicotinonitrile@1.521-rp	2-hydroxynicotinonitrile	120.032	1.521	C6H4N2O	502058	#N/A	rp
FAUX	Erythrose@1.266-rp	Erythrose	120.042	1.266	C4H8O4	#N/A	#N/A	rp
FAUX	4-hydroxystyrene@4.125-rp	4-hydroxystyrene	120.057	4.125	C8H8O	#N/A	Metabolic pathways;Microbial metabolism in diverse environments;Degradation of aromatic compounds;Phenylpropanoid biosynthesis;Phenylalanine metabolism;Other	rp
FAUX	4-hydroxystyrene@2.012-rp	4-hydroxystyrene	120.058	2.012	C8H8O	#N/A	Metabolic pathways;Microbial metabolism in diverse environments;Degradation of aromatic compounds;Phenylpropanoid biosynthesis;Phenylalanine metabolism;Other	rp
FAUX	4-hydroxystyrene@4.427-rp	4-hydroxystyrene	120.058	4.427	C8H8O	#N/A	Metabolic pathways;Microbial metabolism in diverse environments;Degradation of aromatic compounds;Phenylpropanoid biosynthesis;Phenylalanine metabolism;Other	rp
FAUX	4-hydroxystyrene@6.547-rp	4-hydroxystyrene	120.058	6.547	C8H8O	#N/A	Metabolic pathways;Microbial metabolism in diverse environments;Degradation of aromatic compounds;Phenylpropanoid biosynthesis;Phenylalanine metabolism;Other	rp
FAUX	4-hydroxystyrene@9.133-rp	4-hydroxystyrene	120.058	9.133	C8H8O	#N/A	Metabolic pathways;Microbial metabolism in diverse environments;Degradation of aromatic compounds;Phenylpropanoid biosynthesis;Phenylalanine metabolism;Other	rp
FAUX	4-hydroxystyrene@1.545-rp	4-hydroxystyrene	120.058	1.545	C8H8O	#N/A	Metabolic pathways;Microbial metabolism in diverse environments;Degradation of aromatic compounds;Phenylpropanoid biosynthesis;Phenylalanine metabolism;Other	rp
FAUX	4-hydroxystyrene@7.929-rp	4-hydroxystyrene	120.058	7.929	C8H8O	#N/A	Metabolic pathways;Microbial metabolism in diverse environments;Degradation of aromatic compounds;Phenylpropanoid biosynthesis;Phenylalanine metabolism;Other	rp
FAUX	4-hydroxystyrene@8.611-rp	4-hydroxystyrene	120.058	8.611	C8H8O	#N/A	Metabolic pathways;Microbial metabolism in diverse environments;Degradation of aromatic compounds;Phenylpropanoid biosynthesis;Phenylalanine metabolism;Other	rp
FAUX	4-hydroxystyrene@7.678-rp	4-hydroxystyrene	120.058	7.678	C8H8O	#N/A	Metabolic pathways;Microbial metabolism in diverse environments;Degradation of aromatic compounds;Phenylpropanoid biosynthesis;Phenylalanine metabolism;Other	rp
FAUX	4-hydroxystyrene@7.333-rp	4-hydroxystyrene	120.058	7.333	C8H8O	#N/A	Metabolic pathways;Microbial metabolism in diverse environments;Degradation of aromatic compounds;Phenylpropanoid biosynthesis;Phenylalanine metabolism;Other	rp
FAUX	4-hydroxystyrene@6.826-rp	4-hydroxystyrene	120.058	6.826	C8H8O	#N/A	Metabolic pathways;Microbial metabolism in diverse environments;Degradation of aromatic compounds;Phenylpropanoid biosynthesis;Phenylalanine metabolism;Other	rp
FAUX	4-hydroxystyrene@6.107-rp	4-hydroxystyrene	120.058	6.107	C8H8O	#N/A	Metabolic pathways;Microbial metabolism in diverse environments;Degradation of aromatic compounds;Phenylpropanoid biosynthesis;Phenylalanine metabolism;Other	rp
FAUX	4-hydroxystyrene@7.124-rp	4-hydroxystyrene	120.058	7.124	C8H8O	#N/A	Metabolic pathways;Microbial metabolism in diverse environments;Degradation of aromatic compounds;Phenylpropanoid biosynthesis;Phenylalanine metabolism;Other	rp
FAUX	120.06475@1.177-rp	#N/A	120.065	1.177	C2H8N4O2	#N/A	#N/A	rp
FAUX	Cumene@8.247-rp	Cumene	120.094	8.247	C9H12	7128	#N/A	rp
FAUX	120.59511@7.651-rp	#N/A	120.595	7.651	#N/A	#N/A	#N/A	rp
FAUX	2IMH4383Z4@2.662-rp	2IMH4383Z4	121.002	2.662	C3H7NS2	6349	#N/A	rp
FAUX	aminoazobenzene@6.717-rp	aminoazobenzene	121.064	6.717	C6H7N3	10302726	#N/A	rp
FAUX	121.07519@1.091-rp	#N/A	121.075	1.091	#N/A	#N/A	#N/A	rp
FAUX	121.53841@6.316-rp	#N/A	121.538	6.316	#N/A	#N/A	#N/A	rp
FAUX	121.53847@6.572-rp	#N/A	121.538	6.572	#N/A	#N/A	#N/A	rp
FAUX	121.5399@6.302-rp	#N/A	121.54	6.302	#N/A	#N/A	#N/A	rp
FAUX	121.56699@1.1-rp	#N/A	121.567	1.1	#N/A	#N/A	#N/A	rp
FAUX	121.57921@1.095-rp	#N/A	121.579	1.095	#N/A	#N/A	#N/A	rp
FAUX	121.93457@6.121-rp	#N/A	121.935	6.121	#N/A	#N/A	#N/A	rp
FAUX	3-mercaptolacticacid@1.245-rp	3-mercaptolacticacid	122.004	1.245	C3H6O3S	#N/A	Metabolic pathways;Other	rp
FAUX	122.02166@1.35-rp	#N/A	122.022	1.35	C3H6O5	#N/A	#N/A	rp
FAUX	(Nitroimino)dimethanol@6.127-rp	(Nitroimino)dimethanol	122.033	6.127	C2H6N2O4	7822124	#N/A	rp
FAUX	(Nitroimino)dimethanol@0.956-rp	(Nitroimino)dimethanol	122.033	0.956	C2H6N2O4	7822124	#N/A	rp
FAUX	2-hydroxybenzaldehyde@1.545-rp	2-hydroxybenzaldehyde	122.037	1.545	C7H6O2	#N/A	Metabolic pathways;Biosynthesis of secondary metabolites;Microbial metabolism in diverse environments;Degradation of aromatic compounds;Biosynthesis of phenylpropanoids;Biosynthesis of alkaloids derived from shikimate pathway;Phenylalanine metabolism;Aminobenzoate degradation;Other	rp
FAUX	2-hydroxybenzaldehyde@9.917-rp	2-hydroxybenzaldehyde	122.037	9.917	C7H6O2	#N/A	Metabolic pathways;Biosynthesis of secondary metabolites;Microbial metabolism in diverse environments;Degradation of aromatic compounds;Biosynthesis of phenylpropanoids;Biosynthesis of alkaloids derived from shikimate pathway;Phenylalanine metabolism;Aminobenzoate degradation;Other	rp
FAUX	2-hydroxybenzaldehyde@8.334-rp	2-hydroxybenzaldehyde	122.037	8.334	C7H6O2	#N/A	Metabolic pathways;Biosynthesis of secondary metabolites;Microbial metabolism in diverse environments;Degradation of aromatic compounds;Biosynthesis of phenylpropanoids;Biosynthesis of alkaloids derived from shikimate pathway;Phenylalanine metabolism;Aminobenzoate degradation;Other	rp
FAUX	Niacinamide@1.24-rp	Niacinamide	122.048	1.24	C6H6N2O	#N/A	Metabolic pathways;Other	rp
FAUX	Niacinamide@2.487-rp	Niacinamide	122.048	2.487	C6H6N2O	#N/A	Metabolic pathways;Other	rp
FAUX	Niacinamide@1.909-rp	Niacinamide	122.048	1.909	C6H6N2O	#N/A	Metabolic pathways;Other	rp
FAUX	1-(2-Methyl-2-propanyl)-1,3-cyclopentadiene@15.527-rp	1-(2-Methyl-2-propanyl)-1,3-cyclopentadiene	122.109	15.527	C9H14	550148	#N/A	rp
FAUX	122.58614@1.092-rp	#N/A	122.586	1.092	#N/A	#N/A	#N/A	rp
FAUX	122.58699@6.086-rp	#N/A	122.587	6.086	#N/A	#N/A	#N/A	rp
FAUX	122.58708@1.083-rp	#N/A	122.587	1.083	#N/A	#N/A	#N/A	rp
FAUX	122.96724@0.987-rp	#N/A	122.967	0.987	#N/A	#N/A	#N/A	rp
FAUX	123.0171@6.112-rp	#N/A	123.017	6.112	C2H5NO5	#N/A	#N/A	rp
FAUX	123.01712@0.945-rp	#N/A	123.017	0.945	C2H5NO5	#N/A	#N/A	rp
FAUX	Isonicotinicacid@1.689-rp	Isonicotinicacid	123.032	1.689	C6H5NO2	5709	Metabolic pathways;Biosynthesis of secondary metabolites;Microbial metabolism in diverse environments;Biosynthesis of plant secondary metabolites;Degradation of aromatic compounds;Tryptophan metabolism;Aminobenzoate degradation;Other	rp
FAUX	Isonicotinicacid@1.299-rp	Isonicotinicacid	123.032	1.299	C6H5NO2	5709	Metabolic pathways;Biosynthesis of secondary metabolites;Microbial metabolism in diverse environments;Biosynthesis of plant secondary metabolites;Degradation of aromatic compounds;Tryptophan metabolism;Aminobenzoate degradation;Other	rp
FAUX	123.03367@0.945-rp	#N/A	123.034	0.945	#N/A	#N/A	#N/A	rp
FAUX	123.03453@0.948-rp	#N/A	123.035	0.948	#N/A	#N/A	#N/A	rp
FAUX	UV6260496@1.079-rp	UV6260496	123.079	1.079	C6H9N3	12480	#N/A	rp
FAUX	UV6260496@0.923-rp	UV6260496	123.08	0.923	C6H9N3	12480	#N/A	rp
FAUX	UV6260496@1.043-rp	UV6260496	123.08	1.043	C6H9N3	12480	#N/A	rp
FAUX	123.52403@1.072-rp	#N/A	123.524	1.072	#N/A	#N/A	#N/A	rp
FAUX	123.57664@0.973-rp	#N/A	123.577	0.973	#N/A	#N/A	#N/A	rp
FAUX	123.58424@7.016-rp	#N/A	123.584	7.016	#N/A	#N/A	#N/A	rp
FAUX	123.93144@6.121-rp	#N/A	123.931	6.121	#N/A	#N/A	#N/A	rp
FAUX	2-sulfoacetaldehyde@1.158-rp	2-sulfoacetaldehyde	123.983	1.158	C2H4O4S	#N/A	Metabolic pathways;Microbial metabolism in diverse environments;Other	rp
FAUX	Hydroxybenzoquinone@1.171-rp	Hydroxybenzoquinone	124.016	1.171	C6H4O3	#N/A	Metabolic pathways;Microbial metabolism in diverse environments;Aminobenzoate degradation;Other	rp
FAUX	124.01794@0.944-rp	#N/A	124.018	0.944	#N/A	#N/A	#N/A	rp
FAUX	PB2100000@0.944-rp	PB2100000	124.019	0.944	C3H8O3S	5887	#N/A	rp
FAUX	124.02477@1.036-rp	#N/A	124.025	1.036	#N/A	#N/A	#N/A	rp
FAUX	taurinamide@0.967-rp	taurinamide	124.031	0.967	C2H8N2O2S	91498	#N/A	rp
FAUX	2-methoxyphenol@6.221-rp	2-methoxyphenol	124.053	6.221	C7H8O2	#N/A	Metabolic pathways;Microbial metabolism in diverse environments;Degradation of aromatic compounds;Aminobenzoate degradation;Other	rp
FAUX	2-methoxyphenol@3.969-rp	2-methoxyphenol	124.053	3.969	C7H8O2	#N/A	Metabolic pathways;Microbial metabolism in diverse environments;Degradation of aromatic compounds;Aminobenzoate degradation;Other	rp
FAUX	Methylimidazoleacetaldehyde@2.339-rp	Methylimidazoleacetaldehyde	124.064	2.339	C6H8N2O	#N/A	Metabolic pathways;Other	rp
FAUX	GV9100000@9.787-rp	GV9100000	124.089	9.787	C8H12O	6277	#N/A	rp
FAUX	3-Ethyl-1-heptyne@17.818-rp	3-Ethyl-1-heptyne	124.125	17.818	C9H16	9587260	#N/A	rp
FAUX	125.01329@1.492-rp	#N/A	125.013	1.492	#N/A	#N/A	#N/A	rp
FAUX	125.01461@0.879-rp	#N/A	125.015	0.879	C4H4N3P	#N/A	Metabolic pathways;ABC transporters;Other	rp
FAUX	125.01464@0.946-rp	#N/A	125.015	0.946	C4H4N3P	#N/A	Metabolic pathways;ABC transporters;Other	rp
FAUX	125.01465@6.145-rp	#N/A	125.015	6.145	C4H4N3P	#N/A	Metabolic pathways;ABC transporters;Other	rp
FAUX	Taurine@1.102-rp	Taurine	125.015	1.102	C2H7NO3S	1091	Metabolic pathways;ABC transporters;Other	rp
FAUX	Taurine@2.661-rp	Taurine	125.015	2.661	C2H7NO3S	1091	Metabolic pathways;ABC transporters;Other	rp
FAUX	5-methylcytosine@1.665-rp	5-methylcytosine	125.059	1.665	C5H7N3O	#N/A	Metabolic pathways;Other	rp
FAUX	5-methylcytosine@1.261-rp	5-methylcytosine	125.059	1.261	C5H7N3O	#N/A	Metabolic pathways;Other	rp
FAUX	125.05974@1.264-rp	#N/A	125.06	1.264	#N/A	#N/A	#N/A	rp
FAUX	NQ8650000@1.335-rp	NQ8650000	125.084	1.335	C7H11NO	17475	#N/A	rp
FAUX	125.58738@6.576-rp	#N/A	125.587	6.576	#N/A	#N/A	#N/A	rp
FAUX	Arsenousacid@6.118-rp	Arsenousacid	125.93	6.118	H3AsO3	530	#N/A	rp
FAUX	2-hydroxyethanesulfonicacid@1.15-rp	2-hydroxyethanesulfonicacid	125.999	1.15	C2H6O4S	#N/A	Metabolic pathways;Other	rp
FAUX	OB6300000@1.108-rp	OB6300000	126.014	1.108	C6H6OS	6654	#N/A	rp
FAUX	1,3-Dithian-2-yllithium@1.12-rp	1,3-Dithian-2-yllithium	126.015	1.12	C4H7LiS2	12999821	#N/A	rp
FAUX	126.0167@1.353-rp	#N/A	126.017	1.353	C2H6O6	#N/A	#N/A	rp
FAUX	126.01805@1.115-rp	#N/A	126.018	1.115	C3H2N4O2	#N/A	#N/A	rp
FAUX	5hydroxymethylfurfural@1.322-rp	5hydroxymethylfurfural	126.032	1.322	C6H6O3	#N/A	Metabolic pathways;Biosynthesis of secondary metabolites;Microbial metabolism in diverse environments;Aminobenzoate degradation;Other	rp
FAUX	5hydroxymethylfurfural@7.589-rp	5hydroxymethylfurfural	126.032	7.589	C6H6O3	#N/A	Metabolic pathways;Biosynthesis of secondary metabolites;Microbial metabolism in diverse environments;Aminobenzoate degradation;Other	rp
FAUX	5hydroxymethylfurfural@4.477-rp	5hydroxymethylfurfural	126.032	4.477	C6H6O3	#N/A	Metabolic pathways;Biosynthesis of secondary metabolites;Microbial metabolism in diverse environments;Aminobenzoate degradation;Other	rp
FAUX	5hydroxymethylfurfural@1.176-rp	5hydroxymethylfurfural	126.032	1.176	C6H6O3	#N/A	Metabolic pathways;Biosynthesis of secondary metabolites;Microbial metabolism in diverse environments;Aminobenzoate degradation;Other	rp
FAUX	Imidazole-4-aceticacid@1.119-rp	Imidazole-4-aceticacid	126.043	1.119	C5H6N2O2	#N/A	Metabolic pathways;Other	rp
FAUX	Imidazole-4-aceticacid@4.202-rp	Imidazole-4-aceticacid	126.043	4.202	C5H6N2O2	#N/A	Metabolic pathways;Other	rp
FAUX	Imidazole-4-aceticacid@2.434-rp	Imidazole-4-aceticacid	126.043	2.434	C5H6N2O2	#N/A	Metabolic pathways;Other	rp
FAUX	126.06082@1.115-rp	#N/A	126.061	1.115	#N/A	#N/A	#N/A	rp
FAUX	2707@15.531-rp	2707	126.104	15.531	C8H14O	9478	Metabolic pathways;Biosynthesis of secondary metabolites;Other	rp
FAUX	127.01202@0.941-rp	#N/A	127.012	0.941	#N/A	#N/A	#N/A	rp
FAUX	127.02466@1.072-rp	#N/A	127.025	1.072	#N/A	#N/A	#N/A	rp
FAUX	3-Carboxy-5-methylisoxazole@1.177-rp	3-Carboxy-5-methylisoxazole	127.027	1.177	C5H5NO3	69397	Microbial metabolism in diverse environments;Other	rp
FAUX	3-Carboxy-5-methylisoxazole@1.551-rp	3-Carboxy-5-methylisoxazole	127.027	1.551	C5H5NO3	69397	Microbial metabolism in diverse environments;Other	rp
FAUX	4-Ethynylbenzonitrile@3.183-rp	4-Ethynylbenzonitrile	127.042	3.183	C9H5N	3741215	#N/A	rp
FAUX	4-Ethynylbenzonitrile@7.346-rp	4-Ethynylbenzonitrile	127.042	7.346	C9H5N	3741215	#N/A	rp
FAUX	127.05437@13.955-rp	#N/A	127.054	13.955	#N/A	#N/A	#N/A	rp
FAUX	127.05451@13.6-rp	#N/A	127.055	13.6	C6H10NP	#N/A	#N/A	rp
FAUX	delta-Piperideine-2-carboxylicacid@1.198-rp	delta-Piperideine-2-carboxylicacid	127.063	1.198	C6H9NO2	#N/A	Metabolic pathways;Biosynthesis of secondary metabolites;Biosynthesis of plant secondary metabolites;Other	rp
FAUX	delta-Piperideine-2-carboxylicacid@1.523-rp	delta-Piperideine-2-carboxylicacid	127.063	1.523	C6H9NO2	#N/A	Metabolic pathways;Biosynthesis of secondary metabolites;Biosynthesis of plant secondary metabolites;Other	rp
FAUX	delta-Piperideine-2-carboxylicacid@3.476-rp	delta-Piperideine-2-carboxylicacid	127.063	3.476	C6H9NO2	#N/A	Metabolic pathways;Biosynthesis of secondary metabolites;Biosynthesis of plant secondary metabolites;Other	rp
FAUX	127.06894@1.099-rp	#N/A	127.069	1.099	#N/A	#N/A	#N/A	rp
FAUX	127.06897@6.562-rp	#N/A	127.069	6.562	#N/A	#N/A	#N/A	rp
FAUX	4H-1,2,4-Trizaole-4-propanol@1.272-rp	4H-1,2,4-Trizaole-4-propanol	127.075	1.272	C5H9N3O	17929303	#N/A	rp
FAUX	N-cyclohexylformamide@1.323-rp	N-cyclohexylformamide	127.1	1.323	C7H13NO	#N/A	Microbial metabolism in diverse environments;Other	rp
FAUX	127.61562@5.683-rp	#N/A	127.616	5.683	#N/A	#N/A	#N/A	rp
FAUX	127.96035@1.35-rp	#N/A	127.96	1.35	CH4O3S2	#N/A	#N/A	rp
FAUX	127.96036@1.483-rp	#N/A	127.96	1.483	CH4O3S2	#N/A	#N/A	rp
FAUX	127.9786@1.364-rp	#N/A	127.979	1.364	#N/A	#N/A	#N/A	rp
FAUX	2-hydroxyhexdienoicacid@1.151-rp	2-hydroxyhexdienoicacid	128.047	1.151	C6H8O3	#N/A	Metabolic pathways;Microbial metabolism in diverse environments;Degradation of aromatic compounds;Aminobenzoate degradation;Other	rp
FAUX	4-amino-4-cyanobutanoicacid@1.673-rp	4-amino-4-cyanobutanoicacid	128.059	1.673	C5H8N2O2	#N/A	Metabolic pathways;Other	rp
FAUX	4-amino-4-cyanobutanoicacid@2.083-rp	4-amino-4-cyanobutanoicacid	128.059	2.083	C5H8N2O2	#N/A	Metabolic pathways;Other	rp
FAUX	4-amino-4-cyanobutanoicacid@3.705-rp	4-amino-4-cyanobutanoicacid	128.059	3.705	C5H8N2O2	#N/A	Metabolic pathways;Other	rp
FAUX	4-amino-4-cyanobutanoicacid@1.102-rp	4-amino-4-cyanobutanoicacid	128.059	1.102	C5H8N2O2	#N/A	Metabolic pathways;Other	rp
FAUX	Dimethylmalondiimidate@1.52-rp	Dimethylmalondiimidate	128.06	1.52	C5H8N2O2	19993811	#N/A	rp
FAUX	Naphthalene@13.43-rp	Naphthalene	128.062	13.43	C10H8	906	Metabolic pathways;Microbial metabolism in diverse environments;Degradation of aromatic compounds;Other	rp
FAUX	Isonipecotamide@1.524-rp	Isonipecotamide	128.095	1.524	C6H12N2O	3640	#N/A	rp
FAUX	Isonipecotamide@7.564-rp	Isonipecotamide	128.095	7.564	C6H12N2O	3640	#N/A	rp
FAUX	Isonipecotamide@6.844-rp	Isonipecotamide	128.095	6.844	C6H12N2O	3640	#N/A	rp
FAUX	SulpirideimpurityA@0.893-rp	SulpirideimpurityA	128.131	0.893	C7H16N2	104820	#N/A	rp
FAUX	SulpirideimpurityA@6.628-rp	SulpirideimpurityA	128.131	6.628	C7H16N2	104820	#N/A	rp
FAUX	SulpirideimpurityA@7.505-rp	SulpirideimpurityA	128.131	7.505	C7H16N2	104820	#N/A	rp
FAUX	SulpirideimpurityA@0.971-rp	SulpirideimpurityA	128.131	0.971	C7H16N2	104820	#N/A	rp
FAUX	SulpirideimpurityA@6.281-rp	SulpirideimpurityA	128.131	6.281	C7H16N2	104820	#N/A	rp
FAUX	128.41094@6.736-rp	#N/A	128.411	6.736	#N/A	#N/A	#N/A	rp
FAUX	128.56794@6.842-rp	#N/A	128.568	6.842	#N/A	#N/A	#N/A	rp
FAUX	128.56884@1.089-rp	#N/A	128.569	1.089	#N/A	#N/A	#N/A	rp
FAUX	128.56887@6.855-rp	#N/A	128.569	6.855	#N/A	#N/A	#N/A	rp
FAUX	128.56891@7.158-rp	#N/A	128.569	7.158	#N/A	#N/A	#N/A	rp
FAUX	128.58711@0.936-rp	#N/A	128.587	0.936	#N/A	#N/A	#N/A	rp
FAUX	129.00383@1.001-rp	#N/A	129.004	1.001	#N/A	#N/A	#N/A	rp
FAUX	129.00469@0.985-rp	#N/A	129.005	0.985	#N/A	#N/A	#N/A	rp
FAUX	4-oxoproline@1.142-rp	4-oxoproline	129.043	1.142	C5H7NO3	#N/A	Metabolic pathways;Biosynthesis of secondary metabolites;Arginine and proline metabolism;Other	rp
FAUX	4-oxoproline@1.548-rp	4-oxoproline	129.043	1.548	C5H7NO3	#N/A	Metabolic pathways;Biosynthesis of secondary metabolites;Arginine and proline metabolism;Other	rp
FAUX	4-oxoproline@1.916-rp	4-oxoproline	129.043	1.916	C5H7NO3	#N/A	Metabolic pathways;Biosynthesis of secondary metabolites;Arginine and proline metabolism;Other	rp
FAUX	4-oxoproline@3.428-rp	4-oxoproline	129.043	3.428	C5H7NO3	#N/A	Metabolic pathways;Biosynthesis of secondary metabolites;Arginine and proline metabolism;Other	rp
FAUX	2-(Nitromethylene)imidazolidine@1.119-rp	2-(Nitromethylene)imidazolidine	129.053	1.119	C4H7N3O2	2283059	#N/A	rp
FAUX	2-(Nitromethylene)imidazolidine@1.281-rp	2-(Nitromethylene)imidazolidine	129.054	1.281	C4H7N3O2	2283059	#N/A	rp
FAUX	2-(Nitromethylene)imidazolidine@1.127-rp	2-(Nitromethylene)imidazolidine	129.054	1.127	C4H7N3O2	2283059	#N/A	rp
FAUX	leucoline@4.758-rp	leucoline	129.058	4.758	C9H7N	6780	#N/A	rp
FAUX	leucoline@12.354-rp	leucoline	129.058	12.354	C9H7N	6780	#N/A	rp
FAUX	leucoline@8.41-rp	leucoline	129.058	8.41	C9H7N	6780	#N/A	rp
FAUX	leucoline@3.15-rp	leucoline	129.058	3.15	C9H7N	6780	#N/A	rp
FAUX	leucoline@9.582-rp	leucoline	129.058	9.582	C9H7N	6780	#N/A	rp
FAUX	leucoline@9.225-rp	leucoline	129.058	9.225	C9H7N	6780	#N/A	rp
FAUX	leucoline@7.029-rp	leucoline	129.058	7.029	C9H7N	6780	#N/A	rp
FAUX	leucoline@8.134-rp	leucoline	129.058	8.134	C9H7N	6780	#N/A	rp
FAUX	129.07791@1.14-rp	#N/A	129.078	1.14	#N/A	#N/A	Metabolic pathways;Biosynthesis of secondary metabolites;Biosynthesis of plant secondary metabolites;Arginine and proline metabolism;Other	rp
FAUX	4-acetamidobutanal@1.497-rp	4-acetamidobutanal	129.079	1.497	C6H11NO2	389692	Metabolic pathways;Biosynthesis of secondary metabolites;Biosynthesis of plant secondary metabolites;Arginine and proline metabolism;Other	rp
FAUX	4-acetamidobutanal@1.008-rp	4-acetamidobutanal	129.079	1.008	C6H11NO2	389692	Metabolic pathways;Biosynthesis of secondary metabolites;Biosynthesis of plant secondary metabolites;Arginine and proline metabolism;Other	rp
FAUX	4-acetamidobutanal@1.216-rp	4-acetamidobutanal	129.079	1.216	C6H11NO2	389692	Metabolic pathways;Biosynthesis of secondary metabolites;Biosynthesis of plant secondary metabolites;Arginine and proline metabolism;Other	rp
FAUX	4-acetamidobutanal@6.562-rp	4-acetamidobutanal	129.079	6.562	C6H11NO2	389692	Metabolic pathways;Biosynthesis of secondary metabolites;Biosynthesis of plant secondary metabolites;Arginine and proline metabolism;Other	rp
FAUX	4-acetamidobutanal@6.971-rp	4-acetamidobutanal	129.079	6.971	C6H11NO2	389692	Metabolic pathways;Biosynthesis of secondary metabolites;Biosynthesis of plant secondary metabolites;Arginine and proline metabolism;Other	rp
FAUX	4-acetamidobutanal@1.405-rp	4-acetamidobutanal	129.079	1.405	C6H11NO2	389692	Metabolic pathways;Biosynthesis of secondary metabolites;Biosynthesis of plant secondary metabolites;Arginine and proline metabolism;Other	rp
FAUX	4-guanidinobutanal@1.245-rp	4-guanidinobutanal	129.09	1.245	C5H11N3O	543	Metabolic pathways;Arginine and proline metabolism	rp
FAUX	4-guanidinobutanal@1.089-rp	4-guanidinobutanal	129.09	1.089	C5H11N3O	543	Metabolic pathways;Arginine and proline metabolism	rp
FAUX	4-guanidinobutanal@6.673-rp	4-guanidinobutanal	129.09	6.673	C5H11N3O	543	Metabolic pathways;Arginine and proline metabolism	rp
FAUX	129.09489@7.045-rp	#N/A	129.095	7.045	#N/A	#N/A	#N/A	rp
FAUX	Octylamine@16.556-rp	Octylamine	129.152	16.556	C8H19N	7851	#N/A	rp
FAUX	Octylamine@7.471-rp	Octylamine	129.152	7.471	C8H19N	7851	#N/A	rp
FAUX	Octylamine@11.018-rp	Octylamine	129.152	11.018	C8H19N	7851	#N/A	rp
FAUX	129.5948@6.627-rp	#N/A	129.595	6.627	#N/A	#N/A	#N/A	rp
FAUX	129.59496@1.098-rp	#N/A	129.595	1.098	#N/A	#N/A	#N/A	rp
FAUX	130.01167@1.358-rp	#N/A	130.012	1.358	#N/A	#N/A	#N/A	rp
FAUX	2,5-dioxopentanoicacid@1.163-rp	2,5-dioxopentanoicacid	130.027	1.163	C5H6O4	#N/A	Metabolic pathways;Microbial metabolism in diverse environments;2-Oxocarboxylic acid metabolism;Arginine and proline metabolism;Other	rp
FAUX	2,5-dioxopentanoicacid@2.266-rp	2,5-dioxopentanoicacid	130.027	2.266	C5H6O4	#N/A	Metabolic pathways;Microbial metabolism in diverse environments;2-Oxocarboxylic acid metabolism;Arginine and proline metabolism;Other	rp
FAUX	2,5-dioxopentanoicacid@1.504-rp	2,5-dioxopentanoicacid	130.027	1.504	C5H6O4	#N/A	Metabolic pathways;Microbial metabolism in diverse environments;2-Oxocarboxylic acid metabolism;Arginine and proline metabolism;Other	rp
FAUX	Ureidoacrylicacid@1.233-rp	Ureidoacrylicacid	130.038	1.233	C4H6N2O3	#N/A	Metabolic pathways;Other	rp
FAUX	1099281@9.289-rp	1099281	130.042	9.289	C9H6O	68257	#N/A	rp
FAUX	1099281@1.992-rp	1099281	130.042	1.992	C9H6O	68257	#N/A	rp
FAUX	1-oxa-2-oxo-3-hydroxycycloheptane@1.149-rp	1-oxa-2-oxo-3-hydroxycycloheptane	130.063	1.149	C6H10O3	#N/A	Metabolic pathways;Biosynthesis of secondary metabolites;Microbial metabolism in diverse environments;Degradation of aromatic compounds;2-Oxocarboxylic acid metabolism;Biosynthesis of amino acids;Other	rp
FAUX	1-oxa-2-oxo-3-hydroxycycloheptane@3.041-rp	1-oxa-2-oxo-3-hydroxycycloheptane	130.063	3.041	C6H10O3	#N/A	Metabolic pathways;Biosynthesis of secondary metabolites;Microbial metabolism in diverse environments;Degradation of aromatic compounds;2-Oxocarboxylic acid metabolism;Biosynthesis of amino acids;Other	rp
FAUX	1-oxa-2-oxo-3-hydroxycycloheptane@3.395-rp	1-oxa-2-oxo-3-hydroxycycloheptane	130.063	3.395	C6H10O3	#N/A	Metabolic pathways;Biosynthesis of secondary metabolites;Microbial metabolism in diverse environments;Degradation of aromatic compounds;2-Oxocarboxylic acid metabolism;Biosynthesis of amino acids;Other	rp
FAUX	2-Piperazinecarboxylicacid@0.97-rp	2-Piperazinecarboxylicacid	130.074	0.97	C5H10N2O2	2005950	#N/A	rp
FAUX	2-Piperazinecarboxylicacid@1.101-rp	2-Piperazinecarboxylicacid	130.074	1.101	C5H10N2O2	2005950	#N/A	rp
FAUX	(1,4--2-H-2-)Naphthalene@1.518-rp	(1,4--2-H-2-)Naphthalene	130.075	1.518	C10H6D2	#N/A	#N/A	rp
FAUX	1,2-Divinylbenzene@7.95-rp	1,2-Divinylbenzene	130.078	7.95	C10H10	60033	#N/A	rp
FAUX	1,2-Divinylbenzene@13.944-rp	1,2-Divinylbenzene	130.078	13.944	C10H10	60033	#N/A	rp
FAUX	1,2-Divinylbenzene@13.431-rp	1,2-Divinylbenzene	130.078	13.431	C10H10	60033	#N/A	rp
FAUX	130.08229@6.687-rp	#N/A	130.082	6.687	#N/A	#N/A	#N/A	rp
FAUX	Leucinamide@1.188-rp	Leucinamide	130.111	1.188	C6H14N2O	102651	Metabolic pathways;Arginine and proline metabolism	rp
FAUX	130.56632@1.097-rp	#N/A	130.566	1.097	#N/A	#N/A	#N/A	rp
FAUX	130.57193@1.093-rp	#N/A	130.572	1.093	#N/A	#N/A	#N/A	rp
FAUX	130.57308@1.094-rp	#N/A	130.573	1.094	#N/A	#N/A	#N/A	rp
FAUX	CU5250000@4.886-rp	CU5250000	131.037	4.886	C8H5NO	59433	#N/A	rp
FAUX	131.04718@1.106-rp	#N/A	131.047	1.106	#N/A	#N/A	#N/A	rp
FAUX	(Trimethylsilyl)acetate@2.599-rp	(Trimethylsilyl)acetate	131.053	2.599	C5H11O2Si	15295333	#N/A	rp
FAUX	2-amino-4-oxopentanoicacid@1.258-rp	2-amino-4-oxopentanoicacid	131.058	1.258	C5H9NO3	#N/A	Metabolic pathways;Biosynthesis of secondary metabolites;Microbial metabolism in diverse environments;Biosynthesis of plant secondary metabolites;Biosynthesis of amino acids;ABC transporters;Arginine and proline metabolism;Other	rp
FAUX	2-amino-4-oxopentanoicacid@1.102-rp	2-amino-4-oxopentanoicacid	131.058	1.102	C5H9NO3	#N/A	Metabolic pathways;Biosynthesis of secondary metabolites;Microbial metabolism in diverse environments;Biosynthesis of plant secondary metabolites;Biosynthesis of amino acids;ABC transporters;Arginine and proline metabolism;Other	rp
FAUX	2-amino-4-oxopentanoicacid@1.737-rp	2-amino-4-oxopentanoicacid	131.058	1.737	C5H9NO3	#N/A	Metabolic pathways;Biosynthesis of secondary metabolites;Microbial metabolism in diverse environments;Biosynthesis of plant secondary metabolites;Biosynthesis of amino acids;ABC transporters;Arginine and proline metabolism;Other	rp
FAUX	2-amino-4-oxopentanoicacid@1.565-rp	2-amino-4-oxopentanoicacid	131.058	1.565	C5H9NO3	#N/A	Metabolic pathways;Biosynthesis of secondary metabolites;Microbial metabolism in diverse environments;Biosynthesis of plant secondary metabolites;Biosynthesis of amino acids;ABC transporters;Arginine and proline metabolism;Other	rp
FAUX	Creatine@1.158-rp	Creatine	131.069	1.158	C4H9N3O2	566	Metabolic pathways;Arginine and proline metabolism;Other	rp
FAUX	Creatine@0.952-rp	Creatine	131.07	0.952	C4H9N3O2	566	Metabolic pathways;Arginine and proline metabolism;Other	rp
FAUX	Skatole@4.732-rp	Skatole	131.073	4.732	C9H9N	6480	Tryptophan metabolism	rp
FAUX	Skatole@3.155-rp	Skatole	131.073	3.155	C9H9N	6480	Tryptophan metabolism	rp
FAUX	Skatole@6.902-rp	Skatole	131.074	6.902	C9H9N	6480	Tryptophan metabolism	rp
FAUX	Alloisoleucine@7.16-rp	Alloisoleucine	131.095	7.16	C6H13NO2	#N/A	Metabolic pathways;Biosynthesis of secondary metabolites;Microbial metabolism in diverse environments;Biosynthesis of plant secondary metabolites;2-Oxocarboxylic acid metabolism;Biosynthesis of amino acids;ABC transporters;Other	rp
FAUX	Alloisoleucine@5.406-rp	Alloisoleucine	131.095	5.406	C6H13NO2	#N/A	Metabolic pathways;Biosynthesis of secondary metabolites;Microbial metabolism in diverse environments;Biosynthesis of plant secondary metabolites;2-Oxocarboxylic acid metabolism;Biosynthesis of amino acids;ABC transporters;Other	rp
FAUX	Alloisoleucine@1.407-rp	Alloisoleucine	131.095	1.407	C6H13NO2	#N/A	Metabolic pathways;Biosynthesis of secondary metabolites;Microbial metabolism in diverse environments;Biosynthesis of plant secondary metabolites;2-Oxocarboxylic acid metabolism;Biosynthesis of amino acids;ABC transporters;Other	rp
FAUX	Alloisoleucine@6.299-rp	Alloisoleucine	131.095	6.299	C6H13NO2	#N/A	Metabolic pathways;Biosynthesis of secondary metabolites;Microbial metabolism in diverse environments;Biosynthesis of plant secondary metabolites;2-Oxocarboxylic acid metabolism;Biosynthesis of amino acids;ABC transporters;Other	rp
FAUX	N-carbamoylputrescine@1.27-rp	N-carbamoylputrescine	131.106	1.27	C5H13N3O	#N/A	Metabolic pathways;Arginine and proline metabolism	rp
FAUX	131.13603@1.41-rp	#N/A	131.136	1.41	#N/A	#N/A	#N/A	rp
FAUX	131.53237@4.441-rp	#N/A	131.532	4.441	#N/A	#N/A	#N/A	rp
FAUX	131.58175@6.538-rp	#N/A	131.582	6.538	#N/A	#N/A	#N/A	rp
FAUX	3-Methylsulfolene@4.76-rp	3-Methylsulfolene	132.024	4.76	C5H8O2S	64103	#N/A	rp
FAUX	3-Methylsulfolene@4.617-rp	3-Methylsulfolene	132.024	4.617	C5H8O2S	64103	#N/A	rp
FAUX	3-Methylsulfolene@5.121-rp	3-Methylsulfolene	132.025	5.121	C5H8O2S	64103	#N/A	rp
FAUX	3-Methylsulfolene@1.308-rp	3-Methylsulfolene	132.025	1.308	C5H8O2S	64103	#N/A	rp
FAUX	2-acetolacticacid@2.286-rp	2-acetolacticacid	132.042	2.286	C5H8O4	#N/A	Metabolic pathways;Biosynthesis of secondary metabolites;Microbial metabolism in diverse environments;Degradation of aromatic compounds;2-Oxocarboxylic acid metabolism;Biosynthesis of amino acids;Phenylalanine metabolism;Other	rp
FAUX	2-acetolacticacid@1.188-rp	2-acetolacticacid	132.042	1.188	C5H8O4	#N/A	Metabolic pathways;Biosynthesis of secondary metabolites;Microbial metabolism in diverse environments;Degradation of aromatic compounds;2-Oxocarboxylic acid metabolism;Biosynthesis of amino acids;Phenylalanine metabolism;Other	rp
FAUX	2-acetolacticacid@1.521-rp	2-acetolacticacid	132.042	1.521	C5H8O4	#N/A	Metabolic pathways;Biosynthesis of secondary metabolites;Microbial metabolism in diverse environments;Degradation of aromatic compounds;2-Oxocarboxylic acid metabolism;Biosynthesis of amino acids;Phenylalanine metabolism;Other	rp
FAUX	132.05227@6.476-rp	#N/A	132.052	6.476	#N/A	#N/A	#N/A	rp
FAUX	132.05228@6.668-rp	#N/A	132.052	6.668	#N/A	#N/A	#N/A	rp
FAUX	132.05231@7.143-rp	#N/A	132.052	7.143	#N/A	#N/A	#N/A	rp
FAUX	3-ureidopropionicacid@1.275-rp	3-ureidopropionicacid	132.054	1.275	C4H8N2O3	#N/A	Metabolic pathways;Biosynthesis of secondary metabolites;Biosynthesis of plant secondary metabolites;Biosynthesis of amino acids;Arginine and proline metabolism;Other	rp
FAUX	3-ureidopropionicacid@1.09-rp	3-ureidopropionicacid	132.054	1.09	C4H8N2O3	#N/A	Metabolic pathways;Biosynthesis of secondary metabolites;Biosynthesis of plant secondary metabolites;Biosynthesis of amino acids;Arginine and proline metabolism;Other	rp
FAUX	3-ureidopropionicacid@1.494-rp	3-ureidopropionicacid	132.054	1.494	C4H8N2O3	#N/A	Metabolic pathways;Biosynthesis of secondary metabolites;Biosynthesis of plant secondary metabolites;Biosynthesis of amino acids;Arginine and proline metabolism;Other	rp
FAUX	132.05598@28.496-rp	#N/A	132.056	28.496	C3H9N4P	#N/A	#N/A	rp
FAUX	2-hydroxycaproicacid@5.306-rp	2-hydroxycaproicacid	132.079	5.306	C6H12O3	#N/A	Microbial metabolism in diverse environments;Degradation of aromatic compounds;Other	rp
FAUX	2-hydroxycaproicacid@4.083-rp	2-hydroxycaproicacid	132.079	4.083	C6H12O3	#N/A	Microbial metabolism in diverse environments;Degradation of aromatic compounds;Other	rp
FAUX	2-hydroxycaproicacid@5.029-rp	2-hydroxycaproicacid	132.079	5.029	C6H12O3	#N/A	Microbial metabolism in diverse environments;Degradation of aromatic compounds;Other	rp
FAUX	132.08281@6.961-rp	#N/A	132.083	6.961	#N/A	#N/A	#N/A	rp
FAUX	2,4-diaminopentanoicacid@1.116-rp	2,4-diaminopentanoicacid	132.09	1.116	C5H12N2O2	#N/A	Metabolic pathways;Biosynthesis of secondary metabolites;Biosynthesis of plant secondary metabolites;2-Oxocarboxylic acid metabolism;Biosynthesis of amino acids;ABC transporters;Arginine and proline metabolism;Other	rp
FAUX	2,4-diaminopentanoicacid@0.985-rp	2,4-diaminopentanoicacid	132.09	0.985	C5H12N2O2	#N/A	Metabolic pathways;Biosynthesis of secondary metabolites;Biosynthesis of plant secondary metabolites;2-Oxocarboxylic acid metabolism;Biosynthesis of amino acids;ABC transporters;Arginine and proline metabolism;Other	rp
FAUX	1,2,3,4-tetrahydronaphthalene@8.825-rp	1,2,3,4-tetrahydronaphthalene	132.094	8.825	C10H12	#N/A	Microbial metabolism in diverse environments;Other	rp
FAUX	1,2,3,4-tetrahydronaphthalene@15.09-rp	1,2,3,4-tetrahydronaphthalene	132.094	15.09	C10H12	#N/A	Microbial metabolism in diverse environments;Other	rp
FAUX	1,2,3,4-tetrahydronaphthalene@13.432-rp	1,2,3,4-tetrahydronaphthalene	132.094	13.432	C10H12	#N/A	Microbial metabolism in diverse environments;Other	rp
FAUX	1,2,3,4-tetrahydronaphthalene@17.815-rp	1,2,3,4-tetrahydronaphthalene	132.094	17.815	C10H12	#N/A	Microbial metabolism in diverse environments;Other	rp
FAUX	1,2,3,4-tetrahydronaphthalene@9.637-rp	1,2,3,4-tetrahydronaphthalene	132.094	9.637	C10H12	#N/A	Microbial metabolism in diverse environments;Other	rp
FAUX	1,2,3,4-tetrahydronaphthalene@13.953-rp	1,2,3,4-tetrahydronaphthalene	132.094	13.953	C10H12	#N/A	Microbial metabolism in diverse environments;Other	rp
FAUX	1,2,3,4-tetrahydronaphthalene@15.528-rp	1,2,3,4-tetrahydronaphthalene	132.094	15.528	C10H12	#N/A	Microbial metabolism in diverse environments;Other	rp
FAUX	Asparticacid@1.107-rp	Asparticacid	133.038	1.107	C4H7NO4	#N/A	Metabolic pathways;Biosynthesis of secondary metabolites;Microbial metabolism in diverse environments;Biosynthesis of plant secondary metabolites;2-Oxocarboxylic acid metabolism;Biosynthesis of amino acids;ABC transporters;Other	rp
FAUX	7-Azapteridine@1.278-rp	7-Azapteridine	133.039	1.278	C5H3N5	4953877	#N/A	rp
FAUX	4-hydroxyindole@4.844-rp	4-hydroxyindole	133.053	4.844	C8H7NO	#N/A	Metabolic pathways;Biosynthesis of secondary metabolites;Tryptophan metabolism;Other	rp
FAUX	4-hydroxyindole@6.598-rp	4-hydroxyindole	133.053	6.598	C8H7NO	#N/A	Metabolic pathways;Biosynthesis of secondary metabolites;Tryptophan metabolism;Other	rp
FAUX	133.06893@6.625-rp	#N/A	133.069	6.625	#N/A	#N/A	#N/A	rp
FAUX	133.06896@7.847-rp	#N/A	133.069	7.847	#N/A	#N/A	#N/A	rp
FAUX	133.06899@7.5-rp	#N/A	133.069	7.5	#N/A	#N/A	#N/A	rp
FAUX	133.07298@1.116-rp	#N/A	133.073	1.116	#N/A	#N/A	Metabolic pathways;Biosynthesis of secondary metabolites;Other	rp
FAUX	133.4145@6.85-rp	#N/A	133.415	6.85	#N/A	#N/A	#N/A	rp
FAUX	133.98923@0.947-rp	#N/A	133.989	0.947	#N/A	#N/A	#N/A	rp
FAUX	133.99567@1.031-rp	#N/A	133.996	1.031	#N/A	#N/A	#N/A	rp
FAUX	3-dehydrothreonicacid@1.26-rp	3-dehydrothreonicacid	134.022	1.26	C4H6O5	#N/A	Metabolic pathways;Biosynthesis of secondary metabolites;Microbial metabolism in diverse environments;Biosynthesis of plant secondary metabolites;Biosynthesis of phenylpropanoids;Biosynthesis of alkaloids derived from shikimate pathway;Other	rp
FAUX	6-OXOPURINE@4.027-rp	6-OXOPURINE	134.023	4.027	C5H2N4O	11205977	#N/A	rp
FAUX	6-OXOPURINE@2.707-rp	6-OXOPURINE	134.023	2.707	C5H2N4O	11205977	#N/A	rp
FAUX	6-OXOPURINE@2.048-rp	6-OXOPURINE	134.023	2.048	C5H2N4O	11205977	#N/A	rp
FAUX	6-OXOPURINE@3.817-rp	6-OXOPURINE	134.023	3.817	C5H2N4O	11205977	#N/A	rp
FAUX	Phenylglyoxal@8.753-rp	Phenylglyoxal	134.037	8.753	C8H6O2	13470	#N/A	rp
FAUX	Phenylglyoxal@7.931-rp	Phenylglyoxal	134.037	7.931	C8H6O2	13470	#N/A	rp
FAUX	Phenylglyoxal@7.181-rp	Phenylglyoxal	134.037	7.181	C8H6O2	13470	#N/A	rp
FAUX	2,3-dihydroxy-3-methylbutanoicacid@1.132-rp	2,3-dihydroxy-3-methylbutanoicacid	134.058	1.132	C5H10O4	#N/A	Metabolic pathways;Biosynthesis of secondary metabolites;2-Oxocarboxylic acid metabolism;Biosynthesis of amino acids;Other	rp
FAUX	2,3-dihydroxy-3-methylbutanoicacid@1.422-rp	2,3-dihydroxy-3-methylbutanoicacid	134.058	1.422	C5H10O4	#N/A	Metabolic pathways;Biosynthesis of secondary metabolites;2-Oxocarboxylic acid metabolism;Biosynthesis of amino acids;Other	rp
FAUX	2,3-dihydroxy-3-methylbutanoicacid@1.587-rp	2,3-dihydroxy-3-methylbutanoicacid	134.058	1.587	C5H10O4	#N/A	Metabolic pathways;Biosynthesis of secondary metabolites;2-Oxocarboxylic acid metabolism;Biosynthesis of amino acids;Other	rp
FAUX	ABT@1.431-rp	ABT	134.059	1.431	C6H6N4	1326	#N/A	rp
FAUX	134.06058@1.537-rp	#N/A	134.061	1.537	C4H11N2OP	#N/A	#N/A	rp
FAUX	134.06066@2.095-rp	#N/A	134.061	2.095	C4H11N2OP	#N/A	#N/A	rp
FAUX	3-Mercaptohexanol@6.859-rp	3-Mercaptohexanol	134.077	6.859	C6H14OS	454763	#N/A	rp
FAUX	3-Mercaptohexanol@6.014-rp	3-Mercaptohexanol	134.077	6.014	C6H14OS	454763	#N/A	rp
FAUX	3-Mercaptohexanol@1.117-rp	3-Mercaptohexanol	134.077	1.117	C6H14OS	454763	#N/A	rp
FAUX	p-cymene@17.814-rp	p-cymene	134.109	17.814	C10H14	7183	Metabolic pathways;Microbial metabolism in diverse environments;Degradation of aromatic compounds;Other	rp
FAUX	p-cymene@8.213-rp	p-cymene	134.109	8.213	C10H14	7183	Metabolic pathways;Microbial metabolism in diverse environments;Degradation of aromatic compounds;Other	rp
FAUX	134.58705@6.495-rp	#N/A	134.587	6.495	#N/A	#N/A	#N/A	rp
FAUX	135.00689@2.487-rp	#N/A	135.007	2.487	C5HN3O2	#N/A	#N/A	rp
FAUX	135.00692@3.262-rp	#N/A	135.007	3.262	C5HN3O2	#N/A	#N/A	rp
FAUX	2-Hydroxy-3-nitropropanoicacid@1.361-rp	2-Hydroxy-3-nitropropanoicacid	135.017	1.361	C3H5NO5	2572459	#N/A	rp
FAUX	Benzoxazolone@4.477-rp	Benzoxazolone	135.032	4.477	C7H5NO2	5820	#N/A	rp
FAUX	135.04473@7.93-rp	#N/A	135.045	7.93	C4H10NO2P	#N/A	#N/A	rp
FAUX	NSC88613@1.08-rp	NSC88613	135.048	1.08	C8H6FN	61178	#N/A	rp
FAUX	Adenine@2.248-rp	Adenine	135.055	2.248	C5H5N5	185	Metabolic pathways;Other	rp
FAUX	Adenine@4.394-rp	Adenine	135.055	4.394	C5H5N5	185	Metabolic pathways;Other	rp
FAUX	Adenine@5.652-rp	Adenine	135.055	5.652	C5H5N5	185	Metabolic pathways;Other	rp
FAUX	2-phenylacetamide@2.366-rp	2-phenylacetamide	135.068	2.366	C8H9NO	#N/A	Metabolic pathways;Biosynthesis of secondary metabolites;Microbial metabolism in diverse environments;2-Oxocarboxylic acid metabolism;Phenylalanine metabolism;Other	rp
FAUX	2-phenylacetamide@6.621-rp	2-phenylacetamide	135.068	6.621	C8H9NO	#N/A	Metabolic pathways;Biosynthesis of secondary metabolites;Microbial metabolism in diverse environments;2-Oxocarboxylic acid metabolism;Phenylalanine metabolism;Other	rp
FAUX	2-phenylacetamide@3.207-rp	2-phenylacetamide	135.069	3.207	C8H9NO	#N/A	Metabolic pathways;Biosynthesis of secondary metabolites;Microbial metabolism in diverse environments;2-Oxocarboxylic acid metabolism;Phenylalanine metabolism;Other	rp
FAUX	2-phenylacetamide@2.841-rp	2-phenylacetamide	135.069	2.841	C8H9NO	#N/A	Metabolic pathways;Biosynthesis of secondary metabolites;Microbial metabolism in diverse environments;2-Oxocarboxylic acid metabolism;Phenylalanine metabolism;Other	rp
FAUX	2-phenylacetamide@1.548-rp	2-phenylacetamide	135.069	1.548	C8H9NO	#N/A	Metabolic pathways;Biosynthesis of secondary metabolites;Microbial metabolism in diverse environments;2-Oxocarboxylic acid metabolism;Phenylalanine metabolism;Other	rp
FAUX	2-phenylacetamide@7.53-rp	2-phenylacetamide	135.069	7.53	C8H9NO	#N/A	Metabolic pathways;Biosynthesis of secondary metabolites;Microbial metabolism in diverse environments;2-Oxocarboxylic acid metabolism;Phenylalanine metabolism;Other	rp
FAUX	2-phenylacetamide@1.999-rp	2-phenylacetamide	135.069	1.999	C8H9NO	#N/A	Metabolic pathways;Biosynthesis of secondary metabolites;Microbial metabolism in diverse environments;2-Oxocarboxylic acid metabolism;Phenylalanine metabolism;Other	rp
FAUX	135.58228@7.041-rp	#N/A	135.582	7.041	#N/A	#N/A	#N/A	rp
FAUX	135.58241@1.119-rp	#N/A	135.582	1.119	#N/A	#N/A	#N/A	rp
FAUX	135.59467@1.36-rp	#N/A	135.595	1.36	#N/A	#N/A	#N/A	rp
FAUX	135.92664@1.011-rp	#N/A	135.927	1.011	#N/A	#N/A	#N/A	rp
FAUX	135.93305@1.046-rp	#N/A	135.933	1.046	#N/A	#N/A	#N/A	rp
FAUX	136.02232@0.947-rp	#N/A	136.022	0.947	C3H9N2PS	#N/A	#N/A	rp
FAUX	Erythronicacid@1.123-rp	Erythronicacid	136.037	1.123	C4H8O5	#N/A	Metabolic pathways;Other	rp
FAUX	Hypoxanthine@2.426-rp	Hypoxanthine	136.039	2.426	C5H4N4O	#N/A	Metabolic pathways;Other	rp
FAUX	Hypoxanthine@3.565-rp	Hypoxanthine	136.039	3.565	C5H4N4O	#N/A	Metabolic pathways;Other	rp
FAUX	Hypoxanthin@4.376-rp	Hypoxanthin	136.039	4.376	C5H4N4O	768	Metabolic pathways;Other	rp
FAUX	Hypoxanthin@4.866-rp	Hypoxanthin	136.039	4.866	C5H4N4O	768	Metabolic pathways;Other	rp
FAUX	2-hydroxyacetophenone@7.803-rp	2-hydroxyacetophenone	136.052	7.803	C8H8O2	#N/A	Metabolic pathways;Biosynthesis of secondary metabolites;Microbial metabolism in diverse environments;Biosynthesis of plant secondary metabolites;Degradation of aromatic compounds;Phenylpropanoid biosynthesis;Biosynthesis of alkaloids derived from shikimate pathway;Phenylalanine metabolism;Tyrosine metabolism;Other	rp
FAUX	2-hydroxyacetophenone@10.664-rp	2-hydroxyacetophenone	136.052	10.664	C8H8O2	#N/A	Metabolic pathways;Biosynthesis of secondary metabolites;Microbial metabolism in diverse environments;Biosynthesis of plant secondary metabolites;Degradation of aromatic compounds;Phenylpropanoid biosynthesis;Biosynthesis of alkaloids derived from shikimate pathway;Phenylalanine metabolism;Tyrosine metabolism;Other	rp
FAUX	2-hydroxyacetophenone@1.547-rp	2-hydroxyacetophenone	136.053	1.547	C8H8O2	#N/A	Metabolic pathways;Biosynthesis of secondary metabolites;Microbial metabolism in diverse environments;Biosynthesis of plant secondary metabolites;Degradation of aromatic compounds;Phenylpropanoid biosynthesis;Biosynthesis of alkaloids derived from shikimate pathway;Phenylalanine metabolism;Tyrosine metabolism;Other	rp
FAUX	2-hydroxyacetophenone@7.07-rp	2-hydroxyacetophenone	136.053	7.07	C8H8O2	#N/A	Metabolic pathways;Biosynthesis of secondary metabolites;Microbial metabolism in diverse environments;Biosynthesis of plant secondary metabolites;Degradation of aromatic compounds;Phenylpropanoid biosynthesis;Biosynthesis of alkaloids derived from shikimate pathway;Phenylalanine metabolism;Tyrosine metabolism;Other	rp
FAUX	2-hydroxyacetophenone@7.268-rp	2-hydroxyacetophenone	136.053	7.268	C8H8O2	#N/A	Metabolic pathways;Biosynthesis of secondary metabolites;Microbial metabolism in diverse environments;Biosynthesis of plant secondary metabolites;Degradation of aromatic compounds;Phenylpropanoid biosynthesis;Biosynthesis of alkaloids derived from shikimate pathway;Phenylalanine metabolism;Tyrosine metabolism;Other	rp
FAUX	2-hydroxyacetophenone@8.844-rp	2-hydroxyacetophenone	136.053	8.844	C8H8O2	#N/A	Metabolic pathways;Biosynthesis of secondary metabolites;Microbial metabolism in diverse environments;Biosynthesis of plant secondary metabolites;Degradation of aromatic compounds;Phenylpropanoid biosynthesis;Biosynthesis of alkaloids derived from shikimate pathway;Phenylalanine metabolism;Tyrosine metabolism;Other	rp
FAUX	2-hydroxyacetophenone@5.34-rp	2-hydroxyacetophenone	136.053	5.34	C8H8O2	#N/A	Metabolic pathways;Biosynthesis of secondary metabolites;Microbial metabolism in diverse environments;Biosynthesis of plant secondary metabolites;Degradation of aromatic compounds;Phenylpropanoid biosynthesis;Biosynthesis of alkaloids derived from shikimate pathway;Phenylalanine metabolism;Tyrosine metabolism;Other	rp
FAUX	2-hydroxyacetophenone@4.123-rp	2-hydroxyacetophenone	136.053	4.123	C8H8O2	#N/A	Metabolic pathways;Biosynthesis of secondary metabolites;Microbial metabolism in diverse environments;Biosynthesis of plant secondary metabolites;Degradation of aromatic compounds;Phenylpropanoid biosynthesis;Biosynthesis of alkaloids derived from shikimate pathway;Phenylalanine metabolism;Tyrosine metabolism;Other	rp
FAUX	2-hydroxyacetophenone@4.43-rp	2-hydroxyacetophenone	136.053	4.43	C8H8O2	#N/A	Metabolic pathways;Biosynthesis of secondary metabolites;Microbial metabolism in diverse environments;Biosynthesis of plant secondary metabolites;Degradation of aromatic compounds;Phenylpropanoid biosynthesis;Biosynthesis of alkaloids derived from shikimate pathway;Phenylalanine metabolism;Tyrosine metabolism;Other	rp
FAUX	136.06217@1.129-rp	#N/A	136.062	1.129	#N/A	#N/A	#N/A	rp
FAUX	1-methylnicotinamide@1.121-rp	1-methylnicotinamide	136.064	1.121	C7H8N2O	#N/A	#N/A	rp
FAUX	Alpha-pinene@15.528-rp	Alpha-pinene	136.125	15.528	C10H16	#N/A	Metabolic pathways;Biosynthesis of secondary metabolites;Other	rp
FAUX	136.59006@6.165-rp	#N/A	136.59	6.165	#N/A	#N/A	#N/A	rp
FAUX	136.59013@1.092-rp	#N/A	136.59	1.092	#N/A	#N/A	#N/A	rp
FAUX	136.60178@1.115-rp	#N/A	136.602	1.115	#N/A	#N/A	#N/A	rp
FAUX	136.60277@1.096-rp	#N/A	136.603	1.096	#N/A	#N/A	#N/A	rp
FAUX	(2S)-2-Amino-3-sulfanylpropanethioicS-acid@4.317-rp	(2S)-2-Amino-3-sulfanylpropanethioicS-acid	136.997	4.317	C3H7NOS2	18517349	#N/A	rp
FAUX	(2S)-2-Amino-3-sulfanylpropanethioicS-acid@2.661-rp	(2S)-2-Amino-3-sulfanylpropanethioicS-acid	136.997	2.661	C3H7NOS2	18517349	#N/A	rp
FAUX	S-OXYCYSTEINE@1.15-rp	S-OXYCYSTEINE	137.015	1.15	C3H7NO3S	144942	#N/A	rp
FAUX	1-aminocyclopropylphosphonicacid@8.304-rp	1-aminocyclopropylphosphonicacid	137.024	8.304	C3H8NO3P	168967	#N/A	rp
FAUX	137.04512@1.116-rp	#N/A	137.045	1.116	C3H3N7	#N/A	#N/A	rp
FAUX	2-pyridylaceticacid@5.966-rp	2-pyridylaceticacid	137.048	5.966	C7H7NO2	#N/A	Metabolic pathways;Biosynthesis of secondary metabolites;Microbial metabolism in diverse environments;Biosynthesis of plant secondary metabolites;Degradation of aromatic compounds;Biosynthesis of phenylpropanoids;Biosynthesis of amino acids;Biosynthesis of alkaloids derived from shikimate pathway;Tryptophan metabolism;Biosynthesis of various secondary metabolites - part 2;Aminobenzoate degradatio…	rp
FAUX	2-pyridylaceticacid@6.228-rp	2-pyridylaceticacid	137.048	6.228	C7H7NO2	#N/A	Metabolic pathways;Biosynthesis of secondary metabolites;Microbial metabolism in diverse environments;Biosynthesis of plant secondary metabolites;Degradation of aromatic compounds;Biosynthesis of phenylpropanoids;Biosynthesis of amino acids;Biosynthesis of alkaloids derived from shikimate pathway;Tryptophan metabolism;Biosynthesis of various secondary metabolites - part 2;Aminobenzoate degradatio…	rp
FAUX	2-pyridylaceticacid@1.199-rp	2-pyridylaceticacid	137.048	1.199	C7H7NO2	#N/A	Metabolic pathways;Biosynthesis of secondary metabolites;Microbial metabolism in diverse environments;Biosynthesis of plant secondary metabolites;Degradation of aromatic compounds;Biosynthesis of phenylpropanoids;Biosynthesis of amino acids;Biosynthesis of alkaloids derived from shikimate pathway;Tryptophan metabolism;Biosynthesis of various secondary metabolites - part 2;Aminobenzoate degradatio…	rp
FAUX	2-pyridylaceticacid@6.98-rp	2-pyridylaceticacid	137.048	6.98	C7H7NO2	#N/A	Metabolic pathways;Biosynthesis of secondary metabolites;Microbial metabolism in diverse environments;Biosynthesis of plant secondary metabolites;Degradation of aromatic compounds;Biosynthesis of phenylpropanoids;Biosynthesis of amino acids;Biosynthesis of alkaloids derived from shikimate pathway;Tryptophan metabolism;Biosynthesis of various secondary metabolites - part 2;Aminobenzoate degradatio…	rp
FAUX	2-pyridylaceticacid@1.511-rp	2-pyridylaceticacid	137.048	1.511	C7H7NO2	#N/A	Metabolic pathways;Biosynthesis of secondary metabolites;Microbial metabolism in diverse environments;Biosynthesis of plant secondary metabolites;Degradation of aromatic compounds;Biosynthesis of phenylpropanoids;Biosynthesis of amino acids;Biosynthesis of alkaloids derived from shikimate pathway;Tryptophan metabolism;Biosynthesis of various secondary metabolites - part 2;Aminobenzoate degradatio…	rp
FAUX	2-pyridylaceticacid@7.779-rp	2-pyridylaceticacid	137.048	7.779	C7H7NO2	#N/A	Metabolic pathways;Biosynthesis of secondary metabolites;Microbial metabolism in diverse environments;Biosynthesis of plant secondary metabolites;Degradation of aromatic compounds;Biosynthesis of phenylpropanoids;Biosynthesis of amino acids;Biosynthesis of alkaloids derived from shikimate pathway;Tryptophan metabolism;Biosynthesis of various secondary metabolites - part 2;Aminobenzoate degradatio…	rp
FAUX	2-pyridylaceticacid@1.353-rp	2-pyridylaceticacid	137.048	1.353	C7H7NO2	#N/A	Metabolic pathways;Biosynthesis of secondary metabolites;Microbial metabolism in diverse environments;Biosynthesis of plant secondary metabolites;Degradation of aromatic compounds;Biosynthesis of phenylpropanoids;Biosynthesis of amino acids;Biosynthesis of alkaloids derived from shikimate pathway;Tryptophan metabolism;Biosynthesis of various secondary metabolites - part 2;Aminobenzoate degradatio…	rp
FAUX	137.08246@1.03-rp	#N/A	137.082	1.03	#N/A	#N/A	#N/A	rp
FAUX	137.08329@1.51-rp	#N/A	137.083	1.51	#N/A	#N/A	#N/A	rp
FAUX	4-hydroxy-2,6-dimethylaniline@7.008-rp	4-hydroxy-2,6-dimethylaniline	137.084	7.008	C8H11NO	#N/A	Metabolic pathways;Biosynthesis of secondary metabolites;Biosynthesis of plant secondary metabolites;Biosynthesis of alkaloids derived from shikimate pathway;Tyrosine metabolism;Other	rp
FAUX	4-hydroxy-2,6-dimethylaniline@9.187-rp	4-hydroxy-2,6-dimethylaniline	137.084	9.187	C8H11NO	#N/A	Metabolic pathways;Biosynthesis of secondary metabolites;Biosynthesis of plant secondary metabolites;Biosynthesis of alkaloids derived from shikimate pathway;Tyrosine metabolism;Other	rp
FAUX	4-hydroxy-2,6-dimethylaniline@1.538-rp	4-hydroxy-2,6-dimethylaniline	137.084	1.538	C8H11NO	#N/A	Metabolic pathways;Biosynthesis of secondary metabolites;Biosynthesis of plant secondary metabolites;Biosynthesis of alkaloids derived from shikimate pathway;Tyrosine metabolism;Other	rp
FAUX	4-hydroxy-2,6-dimethylaniline@1.999-rp	4-hydroxy-2,6-dimethylaniline	137.084	1.999	C8H11NO	#N/A	Metabolic pathways;Biosynthesis of secondary metabolites;Biosynthesis of plant secondary metabolites;Biosynthesis of alkaloids derived from shikimate pathway;Tyrosine metabolism;Other	rp
FAUX	137.10028@6.757-rp	#N/A	137.1	6.757	#N/A	#N/A	#N/A	rp
FAUX	137.10032@0.93-rp	#N/A	137.1	0.93	#N/A	#N/A	#N/A	rp
FAUX	137.10037@7.14-rp	#N/A	137.1	7.14	#N/A	#N/A	#N/A	rp
FAUX	137.57415@1.104-rp	#N/A	137.574	1.104	#N/A	#N/A	#N/A	rp
FAUX	137.57973@1.092-rp	#N/A	137.58	1.092	#N/A	#N/A	#N/A	rp
FAUX	137.58733@7.081-rp	#N/A	137.587	7.081	#N/A	#N/A	#N/A	rp
FAUX	137.59146@1.088-rp	#N/A	137.591	1.088	#N/A	#N/A	#N/A	rp
FAUX	137.59243@5.603-rp	#N/A	137.592	5.603	#N/A	#N/A	#N/A	rp
FAUX	3-Sulfinopropanoicacid@1.008-rp	3-Sulfinopropanoicacid	137.999	1.008	C3H6O4S	2284634	#N/A	rp
FAUX	137.99966@1.023-rp	#N/A	138	1.023	C3H8O2P2	#N/A	#N/A	rp
FAUX	138.01673@1.339-rp	#N/A	138.017	1.339	C3H6O6	#N/A	#N/A	rp
FAUX	2-hydroxy-5-methylquinone@1.159-rp	2-hydroxy-5-methylquinone	138.032	1.159	C7H6O3	13588621	Metabolic pathways;Biosynthesis of secondary metabolites;Microbial metabolism in diverse environments;Degradation of aromatic compounds;Biosynthesis of phenylpropanoids;Biosynthesis of alkaloids derived from shikimate pathway;Phenylalanine metabolism;Bile secretion;Ubiquinone and other terpenoid-quinone biosynthesis;Tyrosine metabolism;Aminobenzoate degradation;Other	rp
FAUX	2-aminonicotinicacid@1.524-rp	2-aminonicotinicacid	138.043	1.524	C6H6N2O2	#N/A	Metabolic pathways;Other	rp
FAUX	2-aminonicotinicacid@2.641-rp	2-aminonicotinicacid	138.043	2.641	C6H6N2O2	#N/A	Metabolic pathways;Other	rp
FAUX	2-aminonicotinicacid@1.858-rp	2-aminonicotinicacid	138.043	1.858	C6H6N2O2	#N/A	Metabolic pathways;Other	rp
FAUX	138.05552@1.557-rp	#N/A	138.056	1.557	C3H11N2O2P	#N/A	#N/A	rp
FAUX	3-ethylcatechol@5.34-rp	3-ethylcatechol	138.068	5.34	C8H10O2	63462	Metabolic pathways;Microbial metabolism in diverse environments;Degradation of aromatic compounds;Tyrosine metabolism;Other	rp
FAUX	3-ethylcatechol@6.1-rp	3-ethylcatechol	138.068	6.1	C8H10O2	63462	Metabolic pathways;Microbial metabolism in diverse environments;Degradation of aromatic compounds;Tyrosine metabolism;Other	rp
FAUX	3-ethylcatechol@5.965-rp	3-ethylcatechol	138.068	5.965	C8H10O2	63462	Metabolic pathways;Microbial metabolism in diverse environments;Degradation of aromatic compounds;Tyrosine metabolism;Other	rp
FAUX	pentetrazol@6.484-rp	pentetrazol	138.091	6.484	C6H10N4	5704	Metabolic pathways;Other	rp
FAUX	tyraminium@8.48-rp	tyraminium	138.092	8.48	C8H12NO	13076901	#N/A	rp
FAUX	tyraminium@9.157-rp	tyraminium	138.092	9.157	C8H12NO	13076901	#N/A	rp
FAUX	tyraminium@6.928-rp	tyraminium	138.092	6.928	C8H12NO	13076901	#N/A	rp
FAUX	3-(1-Piperidinyl)propanenitrile@6.442-rp	3-(1-Piperidinyl)propanenitrile	138.116	6.442	C8H14N2	17318	#N/A	rp
FAUX	3-(1-Piperidinyl)propanenitrile@7.076-rp	3-(1-Piperidinyl)propanenitrile	138.116	7.076	C8H14N2	17318	#N/A	rp
FAUX	138.43032@7.112-rp	#N/A	138.43	7.112	#N/A	#N/A	#N/A	rp
FAUX	Sulfamoylaceticacid@1.15-rp	Sulfamoylaceticacid	138.994	1.15	C2H5NO4S	9259107	#N/A	rp
FAUX	138.99467@0.954-rp	#N/A	138.995	0.954	C2H7NO2P2	#N/A	#N/A	rp
FAUX	2-hydroxynicotinicacid@1.709-rp	2-hydroxynicotinicacid	139.027	1.709	C6H5NO3	#N/A	Metabolic pathways;Microbial metabolism in diverse environments;Aminobenzoate degradation;Other	rp
FAUX	2-hydroxynicotinicacid@2.859-rp	2-hydroxynicotinicacid	139.027	2.859	C6H5NO3	#N/A	Metabolic pathways;Microbial metabolism in diverse environments;Aminobenzoate degradation;Other	rp
FAUX	2-hydroxynicotinicacid@8.971-rp	2-hydroxynicotinicacid	139.027	8.971	C6H5NO3	#N/A	Metabolic pathways;Microbial metabolism in diverse environments;Aminobenzoate degradation;Other	rp
FAUX	139.06252@1.593-rp	#N/A	139.063	1.593	#N/A	#N/A	#N/A	rp
FAUX	Deferiprone@1.091-rp	Deferiprone	139.063	1.091	C7H9NO2	2866	#N/A	rp
FAUX	Deferiprone@1.207-rp	Deferiprone	139.063	1.207	C7H9NO2	2866	#N/A	rp
FAUX	Deferiprone@1.724-rp	Deferiprone	139.063	1.724	C7H9NO2	2866	#N/A	rp
FAUX	Deferiprone@2.989-rp	Deferiprone	139.063	2.989	C7H9NO2	2866	#N/A	rp
FAUX	Deferiprone@6.814-rp	Deferiprone	139.063	6.814	C7H9NO2	2866	#N/A	rp
FAUX	Deferiprone@4.412-rp	Deferiprone	139.063	4.412	C7H9NO2	2866	#N/A	rp
FAUX	139.52092@4.408-rp	#N/A	139.521	4.408	#N/A	#N/A	#N/A	rp
FAUX	139.94401@7.136-rp	#N/A	139.944	7.136	#N/A	#N/A	#N/A	rp
FAUX	Sulfoaceticacid@1.174-rp	Sulfoaceticacid	139.978	1.174	C2H4O5S	#N/A	Other	rp
FAUX	Sulfoaceticacid@1.481-rp	Sulfoaceticacid	139.978	1.481	C2H4O5S	#N/A	Other	rp
FAUX	139.99795@6.34-rp	#N/A	139.998	6.34	C3H10P2S	#N/A	#N/A	rp
FAUX	4-carboxymethylenebutenolide@1.638-rp	4-carboxymethylenebutenolide	140.011	1.638	C6H4O4	#N/A	Microbial metabolism in diverse environments;Other	rp
FAUX	1753832@1.543-rp	1753832	140.014	1.543	C3H8O4S	76821	#N/A	rp
FAUX	140.04355@6.11-rp	#N/A	140.044	6.11	C2H8N2O5	#N/A	#N/A	rp
FAUX	140.04359@0.946-rp	#N/A	140.044	0.946	C2H8N2O5	#N/A	#N/A	rp
FAUX	140.04435@0.948-rp	#N/A	140.044	0.948	C3H4N6O	#N/A	#N/A	rp
FAUX	2,4,5-trihydroxytoluene@1.131-rp	2,4,5-trihydroxytoluene	140.047	1.131	C7H8O3	63923	Microbial metabolism in diverse environments;Other	rp
FAUX	2,4,5-trihydroxytoluene@2.68-rp	2,4,5-trihydroxytoluene	140.047	2.68	C7H8O3	63923	Microbial metabolism in diverse environments;Other	rp
FAUX	1-methylimidazoleaceticacid@1.524-rp	1-methylimidazoleaceticacid	140.059	1.524	C6H8N2O2	#N/A	Metabolic pathways;Other	rp
FAUX	1-methylimidazoleaceticacid@1.179-rp	1-methylimidazoleaceticacid	140.059	1.179	C6H8N2O2	#N/A	Metabolic pathways;Other	rp
FAUX	1-methylimidazoleaceticacid@1.96-rp	1-methylimidazoleaceticacid	140.059	1.96	C6H8N2O2	#N/A	Metabolic pathways;Other	rp
FAUX	140.09349@1.527-rp	#N/A	140.093	1.527	#N/A	#N/A	#N/A	rp
FAUX	N,N-Diethylcyanoacetamide@6.693-rp	N,N-Diethylcyanoacetamide	140.095	6.693	C7H12N2O	3079596	#N/A	rp
FAUX	RA8509050@15.52-rp	RA8509050	140.12	15.52	C9H16O	4446456	#N/A	rp
FAUX	140.51048@6.397-rp	#N/A	140.51	6.397	#N/A	#N/A	#N/A	rp
FAUX	140.53765@4.433-rp	#N/A	140.538	4.433	#N/A	#N/A	#N/A	rp
FAUX	140.55583@1.112-rp	#N/A	140.556	1.112	#N/A	#N/A	#N/A	rp
FAUX	140.99096@0.943-rp	#N/A	140.991	0.943	CH3NO7	#N/A	#N/A	rp
FAUX	LT7200000@1.571-rp	LT7200000	141.006	1.571	C5H3NO4	12249	#N/A	rp
FAUX	Thiazole,2-propionyl-@9.945-rp	Thiazole,2-propionyl-	141.025	9.945	C6H7NOS	58779	#N/A	rp
FAUX	141.02755@6.106-rp	#N/A	141.028	6.106	#N/A	#N/A	#N/A	rp
FAUX	141.02772@0.942-rp	#N/A	141.028	0.942	#N/A	#N/A	#N/A	rp
FAUX	141.04029@1.076-rp	#N/A	141.04	1.076	C2H3N7O	#N/A	#N/A	rp
FAUX	2-aminomuconicacidsemialdehyde@3.167-rp	2-aminomuconicacidsemialdehyde	141.043	3.167	C6H7NO3	#N/A	Metabolic pathways;Microbial metabolism in diverse environments;Tryptophan metabolism;Aminobenzoate degradation;Other	rp
FAUX	2-aminomuconicacidsemialdehyde@1.611-rp	2-aminomuconicacidsemialdehyde	141.043	1.611	C6H7NO3	#N/A	Metabolic pathways;Microbial metabolism in diverse environments;Tryptophan metabolism;Aminobenzoate degradation;Other	rp
FAUX	2-aminomuconicacidsemialdehyde@1.205-rp	2-aminomuconicacidsemialdehyde	141.043	1.205	C6H7NO3	#N/A	Metabolic pathways;Microbial metabolism in diverse environments;Tryptophan metabolism;Aminobenzoate degradation;Other	rp
FAUX	Dimetridazole@3.109-rp	Dimetridazole	141.053	3.109	C5H7N3O2	2980	#N/A	rp
FAUX	Pyrrolo(2,1,5-cd)indolizine@3.147-rp	Pyrrolo(2,1,5-cd)indolizine	141.058	3.147	C10H7N	119810	#N/A	rp
FAUX	Pyrrolo(2,1,5-cd)indolizine@1.711-rp	Pyrrolo(2,1,5-cd)indolizine	141.058	1.711	C10H7N	119810	#N/A	rp
FAUX	Pyrrolo(2,1,5-cd)indolizine@1.946-rp	Pyrrolo(2,1,5-cd)indolizine	141.058	1.946	C10H7N	119810	#N/A	rp
FAUX	ectoinate@1.694-rp	ectoinate	141.066	1.694	C6H9N2O2	21376558	#N/A	rp
FAUX	141.07017@13.623-rp	#N/A	141.07	13.623	C7H12NP	#N/A	#N/A	rp
FAUX	4-amino-2-imino-5,5-dimethyl-2,5-dihydro-1h-imidazol-1-yloxyradical@1.33-rp	4-amino-2-imino-5,5-dimethyl-2,5-dihydro-1h-imidazol-1-yloxyradical	141.078	1.33	C5H9N4O	9297966	#N/A	rp
FAUX	Ethosuximide@1.094-rp	Ethosuximide	141.079	1.094	C7H11NO2	3175	#N/A	rp
FAUX	Histidinol@6.127-rp	Histidinol	141.09	6.127	C6H11N3O	#N/A	Metabolic pathways;Biosynthesis of secondary metabolites;Biosynthesis of amino acids;Other	rp
FAUX	Hygrine@1.532-rp	Hygrine	141.115	1.532	C8H15NO	#N/A	Metabolic pathways;Biosynthesis of secondary metabolites;Other	rp
FAUX	141.58226@0.929-rp	#N/A	141.582	0.929	#N/A	#N/A	#N/A	rp
FAUX	141.99369@1.152-rp	#N/A	141.994	1.152	C4H3N2O2P	#N/A	#N/A	rp
FAUX	142.01161@6.108-rp	#N/A	142.012	6.108	#N/A	#N/A	#N/A	rp
FAUX	142.01169@2.009-rp	#N/A	142.012	2.009	C2H6O7	#N/A	#N/A	rp
FAUX	142.01171@0.945-rp	#N/A	142.012	0.945	#N/A	#N/A	#N/A	rp
FAUX	142.02429@1.017-rp	#N/A	142.024	1.017	#N/A	#N/A	#N/A	rp
FAUX	2-hydroxymuconicacidsemialdehyde@1.179-rp	2-hydroxymuconicacidsemialdehyde	142.026	1.179	C6H6O4	#N/A	Metabolic pathways;Microbial metabolism in diverse environments;Degradation of aromatic compounds;Other	rp
FAUX	2-hydroxymuconicacidsemialdehyde@1.506-rp	2-hydroxymuconicacidsemialdehyde	142.027	1.506	C6H6O4	#N/A	Metabolic pathways;Microbial metabolism in diverse environments;Degradation of aromatic compounds;Other	rp
FAUX	1,1-Cyclobutanedicarboxylate@0.95-rp	1,1-Cyclobutanedicarboxylate	142.028	0.95	C6H6O4	4406142	#N/A	rp
FAUX	142.02902@0.947-rp	#N/A	142.029	0.947	#N/A	#N/A	#N/A	rp
FAUX	1,4,5-Trimethyl-1,3-dihydro-2H-imidazole-2-thione@1.101-rp	1,4,5-Trimethyl-1,3-dihydro-2H-imidazole-2-thione	142.056	1.101	C6H10N2S	8233147	#N/A	rp
FAUX	142.06224@1.743-rp	#N/A	142.062	1.743	#N/A	#N/A	#N/A	rp
FAUX	2-Oxocyclohexanecarboxylicacid@5.385-rp	2-Oxocyclohexanecarboxylicacid	142.063	5.385	C7H10O3	8117783	#N/A	rp
FAUX	Ectoine@1.734-rp	Ectoine	142.074	1.734	C6H10N2O2	670	Metabolic pathways;Microbial metabolism in diverse environments;Other	rp
FAUX	Ectoine@1.545-rp	Ectoine	142.074	1.545	C6H10N2O2	670	Metabolic pathways;Microbial metabolism in diverse environments;Other	rp
FAUX	1-methylnaphthalene@13.637-rp	1-methylnaphthalene	142.078	13.637	C11H10	#N/A	Microbial metabolism in diverse environments;Degradation of aromatic compounds;Other	rp
FAUX	1-(3-Aminopropyl)-2-pyrrolidone@1.342-rp	1-(3-Aminopropyl)-2-pyrrolidone	142.111	1.342	C7H14N2O	74106	#N/A	rp
FAUX	1-(3-Aminopropyl)-2-pyrrolidone@6.452-rp	1-(3-Aminopropyl)-2-pyrrolidone	142.111	6.452	C7H14N2O	74106	#N/A	rp
FAUX	1-(3-Aminopropyl)-2-pyrrolidone@6.704-rp	1-(3-Aminopropyl)-2-pyrrolidone	142.111	6.704	C7H14N2O	74106	#N/A	rp
FAUX	1-(3-Aminopropyl)-2-pyrrolidone@1.719-rp	1-(3-Aminopropyl)-2-pyrrolidone	142.111	1.719	C7H14N2O	74106	#N/A	rp
FAUX	1-(3-Aminopropyl)-2-pyrrolidone@7.139-rp	1-(3-Aminopropyl)-2-pyrrolidone	142.111	7.139	C7H14N2O	74106	#N/A	rp
FAUX	142.56633@1.099-rp	#N/A	142.566	1.099	#N/A	#N/A	#N/A	rp
FAUX	142.57191@6.922-rp	#N/A	142.572	6.922	#N/A	#N/A	#N/A	rp
FAUX	142.59007@6.79-rp	#N/A	142.59	6.79	#N/A	#N/A	#N/A	rp
FAUX	142.75836@7.069-rp	#N/A	142.758	7.069	#N/A	#N/A	#N/A	rp
FAUX	143.00674@0.978-rp	#N/A	143.007	0.978	#N/A	#N/A	#N/A	rp
FAUX	143.0133@6.398-rp	#N/A	143.013	6.398	C5H6NO2P	#N/A	#N/A	rp
FAUX	143.01637@8.483-rp	#N/A	143.016	8.483	#N/A	#N/A	#N/A	rp
FAUX	N-formylmaleamicacid@1.167-rp	N-formylmaleamicacid	143.022	1.167	C5H5NO4	9079658	Metabolic pathways;Microbial metabolism in diverse environments;Other	rp
FAUX	iminoglutarate@1.174-rp	iminoglutarate	143.023	1.174	C5H5NO4	19987219	#N/A	rp
FAUX	143.02375@0.952-rp	#N/A	143.024	0.952	#N/A	#N/A	#N/A	rp
FAUX	143.02512@6.109-rp	#N/A	143.025	6.109	C4H6N3OP	#N/A	#N/A	rp
FAUX	143.02518@0.943-rp	#N/A	143.025	0.943	C4H6N3OP	#N/A	#N/A	rp
FAUX	143.03009@0.99-rp	#N/A	143.03	0.99	#N/A	#N/A	#N/A	rp
FAUX	143.03699@6.581-rp	#N/A	143.037	6.581	C9H5NO	#N/A	#N/A	rp
FAUX	trimethadione@4.568-rp	trimethadione	143.058	4.568	C6H9NO3	5374	#N/A	rp
FAUX	trimethadione@1.595-rp	trimethadione	143.058	1.595	C6H9NO3	5374	#N/A	rp
FAUX	trimethadione@1.173-rp	trimethadione	143.058	1.173	C6H9NO3	5374	#N/A	rp
FAUX	trimethadione@1.993-rp	trimethadione	143.058	1.993	C6H9NO3	5374	#N/A	rp
FAUX	trimethadione@2.616-rp	trimethadione	143.058	2.616	C6H9NO3	5374	#N/A	rp
FAUX	143.06392@1.11-rp	#N/A	143.064	1.11	#N/A	#N/A	#N/A	rp
FAUX	1-naphthylamine@3.149-rp	1-naphthylamine	143.073	3.149	C10H9N	#N/A	Other	rp
FAUX	1-naphthylamine@4.717-rp	1-naphthylamine	143.073	4.717	C10H9N	#N/A	Other	rp
FAUX	1-naphthylamine@6.935-rp	1-naphthylamine	143.074	6.935	C10H9N	#N/A	Other	rp
FAUX	143.08206@1.09-rp	#N/A	143.082	1.09	#N/A	#N/A	#N/A	rp
FAUX	Homocycloleucine@1.344-rp	Homocycloleucine	143.095	1.344	C7H13NO2	1325	ABC transporters	rp
FAUX	Homocycloleucine@4.059-rp	Homocycloleucine	143.095	4.059	C7H13NO2	1325	ABC transporters	rp
FAUX	Homocycloleucine@1.568-rp	Homocycloleucine	143.095	1.568	C7H13NO2	1325	ABC transporters	rp
FAUX	Homocycloleucine@3.037-rp	Homocycloleucine	143.095	3.037	C7H13NO2	1325	ABC transporters	rp
FAUX	143.11056@6.957-rp	#N/A	143.111	6.957	#N/A	#N/A	#N/A	rp
FAUX	143.11848@6.517-rp	#N/A	143.118	6.517	#N/A	#N/A	#N/A	rp
FAUX	143.59787@1.158-rp	#N/A	143.598	1.158	#N/A	#N/A	#N/A	rp
FAUX	143.5979@6.626-rp	#N/A	143.598	6.626	#N/A	#N/A	#N/A	rp
FAUX	143.61054@1.112-rp	#N/A	143.611	1.112	#N/A	#N/A	#N/A	rp
FAUX	143.97463@24.123-rp	#N/A	143.975	24.123	C2H2N4P2	#N/A	#N/A	rp
FAUX	DC1050000@1.468-rp	DC1050000	143.981	1.468	C6H5ClS	7527	#N/A	rp
FAUX	144.00919@0.945-rp	#N/A	144.009	0.945	C4H5N2O2P	#N/A	#N/A	rp
FAUX	144.02094@8.757-rp	#N/A	144.021	8.757	C9H4O2	#N/A	#N/A	rp
FAUX	144.0273@1.404-rp	#N/A	144.027	1.404	#N/A	#N/A	#N/A	rp
FAUX	1,3-Dinitroso-2-imidazolidinone@0.946-rp	1,3-Dinitroso-2-imidazolidinone	144.029	0.946	C3H4N4O3	570221	#N/A	rp
FAUX	2-methyleneglutaricacid@1.183-rp	2-methyleneglutaricacid	144.042	1.183	C6H8O4	85862	Microbial metabolism in diverse environments;Other	rp
FAUX	2-methyleneglutaricacid@1.5-rp	2-methyleneglutaricacid	144.042	1.5	C6H8O4	85862	Microbial metabolism in diverse environments;Other	rp
FAUX	2-methyleneglutaricacid@1.671-rp	2-methyleneglutaricacid	144.042	1.671	C6H8O4	85862	Microbial metabolism in diverse environments;Other	rp
FAUX	N-Nitrosoproline@1.103-rp	N-Nitrosoproline	144.054	1.103	C5H8N2O3	8594734	#N/A	rp
FAUX	2-phenylimidazole@4.755-rp	2-phenylimidazole	144.069	4.755	C9H8N2	#N/A	#N/A	rp
FAUX	Adipamide@1.565-rp	Adipamide	144.09	1.565	C6H12N2O2	11858	#N/A	rp
FAUX	4-pentynylbenzene@13.958-rp	4-pentynylbenzene	144.094	13.958	C11H12	67151	#N/A	rp
FAUX	4-pentynylbenzene@14.396-rp	4-pentynylbenzene	144.094	14.396	C11H12	67151	#N/A	rp
FAUX	4-pentynylbenzene@13.428-rp	4-pentynylbenzene	144.094	13.428	C11H12	67151	#N/A	rp
FAUX	2-Fluoro-1-octen-3-one@13.634-rp	2-Fluoro-1-octen-3-one	144.095	13.634	C8H13FO	30777290	#N/A	rp
FAUX	Valproicacid@17.626-rp	Valproicacid	144.115	17.626	C8H16O2	3009	Metabolic pathways;Biosynthesis of plant secondary metabolites;Bile secretion;Other	rp
FAUX	3-Morpholinopropylamine@1.324-rp	3-Morpholinopropylamine	144.126	1.324	C7H16N2O	55014	#N/A	rp
FAUX	144.56935@1.104-rp	#N/A	144.569	1.104	#N/A	#N/A	#N/A	rp
FAUX	144.9885@1.47-rp	#N/A	144.988	1.47	#N/A	#N/A	#N/A	rp
FAUX	3-Thioxo-L-proline@1.464-rp	3-Thioxo-L-proline	145.02	1.464	C5H7NO2S	18711710	#N/A	rp
FAUX	UO7518000@1.168-rp	UO7518000	145.039	1.168	C6H3N5	67423	#N/A	rp
FAUX	8-hydroxyquinoline@6.803-rp	8-hydroxyquinoline	145.053	6.803	C9H7NO	#N/A	#N/A	rp
FAUX	8-hydroxyquinoline@3.15-rp	8-hydroxyquinoline	145.053	3.15	C9H7NO	#N/A	#N/A	rp
FAUX	8-hydroxyquinoline@1.729-rp	8-hydroxyquinoline	145.053	1.729	C9H7NO	#N/A	#N/A	rp
FAUX	8-hydroxyquinoline@9.835-rp	8-hydroxyquinoline	145.053	9.835	C9H7NO	#N/A	#N/A	rp
FAUX	8-hydroxyquinoline@2.524-rp	8-hydroxyquinoline	145.053	2.524	C9H7NO	#N/A	#N/A	rp
FAUX	8-hydroxyquinoline@4.581-rp	8-hydroxyquinoline	145.053	4.581	C9H7NO	#N/A	#N/A	rp
FAUX	8-hydroxyquinoline@9.571-rp	8-hydroxyquinoline	145.053	9.571	C9H7NO	#N/A	#N/A	rp
FAUX	8-hydroxyquinoline@6.396-rp	8-hydroxyquinoline	145.053	6.396	C9H7NO	#N/A	#N/A	rp
FAUX	8-hydroxyquinoline@6.683-rp	8-hydroxyquinoline	145.053	6.683	C9H7NO	#N/A	#N/A	rp
FAUX	8-hydroxyquinoline@9.689-rp	8-hydroxyquinoline	145.053	9.689	C9H7NO	#N/A	#N/A	rp
FAUX	8-hydroxyquinoline@6.978-rp	8-hydroxyquinoline	145.053	6.978	C9H7NO	#N/A	#N/A	rp
FAUX	8-hydroxyquinoline@5.363-rp	8-hydroxyquinoline	145.053	5.363	C9H7NO	#N/A	#N/A	rp
FAUX	8-hydroxyquinoline@7.353-rp	8-hydroxyquinoline	145.053	7.353	C9H7NO	#N/A	#N/A	rp
FAUX	8-hydroxyquinoline@8.419-rp	8-hydroxyquinoline	145.053	8.419	C9H7NO	#N/A	#N/A	rp
FAUX	145.05617@3.853-rp	#N/A	145.056	3.853	C6H11NOS	#N/A	#N/A	rp
FAUX	2-amino-5-oxohexanoicacid@1.419-rp	2-amino-5-oxohexanoicacid	145.074	1.419	C6H11NO3	#N/A	Metabolic pathways;Biosynthesis of secondary metabolites;Biosynthesis of plant secondary metabolites;Biosynthesis of amino acids;Arginine and proline metabolism;Other	rp
FAUX	2-amino-5-oxohexanoicacid@0.957-rp	2-amino-5-oxohexanoicacid	145.074	0.957	C6H11NO3	#N/A	Metabolic pathways;Biosynthesis of secondary metabolites;Biosynthesis of plant secondary metabolites;Biosynthesis of amino acids;Arginine and proline metabolism;Other	rp
FAUX	2-amino-5-oxohexanoicacid@2.412-rp	2-amino-5-oxohexanoicacid	145.074	2.412	C6H11NO3	#N/A	Metabolic pathways;Biosynthesis of secondary metabolites;Biosynthesis of plant secondary metabolites;Biosynthesis of amino acids;Arginine and proline metabolism;Other	rp
FAUX	2-amino-5-oxohexanoicacid@3.059-rp	2-amino-5-oxohexanoicacid	145.074	3.059	C6H11NO3	#N/A	Metabolic pathways;Biosynthesis of secondary metabolites;Biosynthesis of plant secondary metabolites;Biosynthesis of amino acids;Arginine and proline metabolism;Other	rp
FAUX	2-amino-5-oxohexanoicacid@1.114-rp	2-amino-5-oxohexanoicacid	145.074	1.114	C6H11NO3	#N/A	Metabolic pathways;Biosynthesis of secondary metabolites;Biosynthesis of plant secondary metabolites;Biosynthesis of amino acids;Arginine and proline metabolism;Other	rp
FAUX	2-amino-5-oxohexanoicacid@2.058-rp	2-amino-5-oxohexanoicacid	145.074	2.058	C6H11NO3	#N/A	Metabolic pathways;Biosynthesis of secondary metabolites;Biosynthesis of plant secondary metabolites;Biosynthesis of amino acids;Arginine and proline metabolism;Other	rp
FAUX	145.07947@0.933-rp	#N/A	145.079	0.933	#N/A	#N/A	#N/A	rp
FAUX	4-guanidinobutanoicacid@1.275-rp	4-guanidinobutanoicacid	145.085	1.275	C5H11N3O2	#N/A	Metabolic pathways;Arginine and proline metabolism	rp
FAUX	3-amino-4-methylhexanoicacid@1.175-rp	3-amino-4-methylhexanoicacid	145.11	1.175	C7H15NO2	#N/A	#N/A	rp
FAUX	3-amino-4-methylhexanoicacid@1.486-rp	3-amino-4-methylhexanoicacid	145.11	1.486	C7H15NO2	#N/A	#N/A	rp
FAUX	L-Lysinamide@6.832-rp	L-Lysinamide	145.121	6.832	C6H15N3O	388683	#N/A	rp
FAUX	L-Lysinamide@7.202-rp	L-Lysinamide	145.122	7.202	C6H15N3O	388683	#N/A	rp
FAUX	Spermidine@7.15-rp	Spermidine	145.158	7.15	C7H19N3	#N/A	Metabolic pathways;Phenylpropanoid biosynthesis;ABC transporters;Bile secretion;Arginine and proline metabolism;Other	rp
FAUX	Spermidine@7.477-rp	Spermidine	145.158	7.477	C7H19N3	#N/A	Metabolic pathways;Phenylpropanoid biosynthesis;ABC transporters;Bile secretion;Arginine and proline metabolism;Other	rp
FAUX	Spermidine@6.496-rp	Spermidine	145.158	6.496	C7H19N3	#N/A	Metabolic pathways;Phenylpropanoid biosynthesis;ABC transporters;Bile secretion;Arginine and proline metabolism;Other	rp
FAUX	145.58472@6.779-rp	#N/A	145.585	6.779	#N/A	#N/A	#N/A	rp
FAUX	145.59734@7.008-rp	#N/A	145.597	7.008	#N/A	#N/A	#N/A	rp
FAUX	145.98924@1.353-rp	#N/A	145.989	1.353	C2H2N4O2S	#N/A	#N/A	rp
FAUX	2-oxoglutaricacid@1.485-rp	2-oxoglutaricacid	146.022	1.485	C5H6O5	#N/A	Metabolic pathways;Biosynthesis of secondary metabolites;Microbial metabolism in diverse environments;Biosynthesis of plant secondary metabolites;2-Oxocarboxylic acid metabolism;Biosynthesis of phenylpropanoids;Biosynthesis of amino acids;Biosynthesis of alkaloids derived from shikimate pathway;Bile secretion;Other	rp
FAUX	146.03623@11.846-rp	#N/A	146.036	11.846	C3H7N4OP	#N/A	Biosynthesis of secondary metabolites;Phenylpropanoid biosynthesis	rp
FAUX	Chromone@6.24-rp	Chromone	146.037	6.24	C9H6O2	9866	Biosynthesis of secondary metabolites;Phenylpropanoid biosynthesis	rp
FAUX	Chromone@8.758-rp	Chromone	146.037	8.758	C9H6O2	9866	Biosynthesis of secondary metabolites;Phenylpropanoid biosynthesis	rp
FAUX	Chromone@13.254-rp	Chromone	146.037	13.254	C9H6O2	9866	Biosynthesis of secondary metabolites;Phenylpropanoid biosynthesis	rp
FAUX	Chromone@9.101-rp	Chromone	146.037	9.101	C9H6O2	9866	Biosynthesis of secondary metabolites;Phenylpropanoid biosynthesis	rp
FAUX	Chromone@6.542-rp	Chromone	146.037	6.542	C9H6O2	9866	Biosynthesis of secondary metabolites;Phenylpropanoid biosynthesis	rp
FAUX	Chromone@8.551-rp	Chromone	146.037	8.551	C9H6O2	9866	Biosynthesis of secondary metabolites;Phenylpropanoid biosynthesis	rp
FAUX	Chromone@9.402-rp	Chromone	146.037	9.402	C9H6O2	9866	Biosynthesis of secondary metabolites;Phenylpropanoid biosynthesis	rp
FAUX	Chromone@6.993-rp	Chromone	146.037	6.993	C9H6O2	9866	Biosynthesis of secondary metabolites;Phenylpropanoid biosynthesis	rp
FAUX	Chromone@7.334-rp	Chromone	146.037	7.334	C9H6O2	9866	Biosynthesis of secondary metabolites;Phenylpropanoid biosynthesis	rp
FAUX	Chromone@1.551-rp	Chromone	146.037	1.551	C9H6O2	9866	Biosynthesis of secondary metabolites;Phenylpropanoid biosynthesis	rp
FAUX	2-methyl-1,3-thiazolidine-2-carboxamide@2.324-rp	2-methyl-1,3-thiazolidine-2-carboxamide	146.051	2.324	C5H10N2OS	452493	#N/A	rp
FAUX	2,2-dimethylsuccinicacid@1.134-rp	2,2-dimethylsuccinicacid	146.058	1.134	C6H10O4	#N/A	Metabolic pathways;Biosynthesis of secondary metabolites;Microbial metabolism in diverse environments;Degradation of aromatic compounds;2-Oxocarboxylic acid metabolism;Biosynthesis of amino acids;Aminobenzoate degradation;Other	rp
FAUX	2,2-dimethylsuccinicacid@3.475-rp	2,2-dimethylsuccinicacid	146.058	3.475	C6H10O4	#N/A	Metabolic pathways;Biosynthesis of secondary metabolites;Microbial metabolism in diverse environments;Degradation of aromatic compounds;2-Oxocarboxylic acid metabolism;Biosynthesis of amino acids;Aminobenzoate degradation;Other	rp
FAUX	XF7538750@1.989-rp	XF7538750	146.059	1.989	C7H6N4	78860	#N/A	rp
FAUX	146.06418@7.454-rp	#N/A	146.064	7.454	#N/A	#N/A	#N/A	rp
FAUX	146.06422@6.608-rp	#N/A	146.064	6.608	#N/A	#N/A	#N/A	rp
FAUX	146.06426@6.298-rp	#N/A	146.064	6.298	#N/A	#N/A	#N/A	rp
FAUX	146.06426@6.408-rp	#N/A	146.064	6.408	#N/A	#N/A	#N/A	rp
FAUX	146.06764@1.098-rp	#N/A	146.068	1.098	#N/A	#N/A	#N/A	rp
FAUX	Alanylglycine@1.107-rp	Alanylglycine	146.069	1.107	C5H10N2O3	#N/A	Metabolic pathways;Microbial metabolism in diverse environments;Biosynthesis of plant secondary metabolites;Biosynthesis of amino acids;ABC transporters;Other	rp
FAUX	146.07036@1.114-rp	#N/A	146.07	1.114	#N/A	#N/A	#N/A	rp
FAUX	1-(1H-Pyrazol-5-yl)pyridinium@6.533-rp	1-(1H-Pyrazol-5-yl)pyridinium	146.071	6.533	C8H8N3	16459576	#N/A	rp
FAUX	146.10454@1.109-rp	#N/A	146.105	1.109	#N/A	#N/A	#N/A	rp
FAUX	3,5-diaminohexanoicacid@6.639-rp	3,5-diaminohexanoicacid	146.106	6.639	C6H14N2O2	#N/A	Metabolic pathways;Biosynthesis of secondary metabolites;Microbial metabolism in diverse environments;Biosynthesis of plant secondary metabolites;2-Oxocarboxylic acid metabolism;Biosynthesis of amino acids;ABC transporters;Other	rp
FAUX	3,5-diaminohexanoicacid@0.978-rp	3,5-diaminohexanoicacid	146.106	0.978	C6H14N2O2	#N/A	Metabolic pathways;Biosynthesis of secondary metabolites;Microbial metabolism in diverse environments;Biosynthesis of plant secondary metabolites;2-Oxocarboxylic acid metabolism;Biosynthesis of amino acids;ABC transporters;Other	rp
FAUX	MFCD00027233@13.957-rp	MFCD00027233	146.109	13.957	C11H14	4521397	#N/A	rp
FAUX	MFCD00027233@15.088-rp	MFCD00027233	146.109	15.088	C11H14	4521397	#N/A	rp
FAUX	MFCD00027233@16.27-rp	MFCD00027233	146.109	16.27	C11H14	4521397	#N/A	rp
FAUX	MFCD00027233@10.217-rp	MFCD00027233	146.109	10.217	C11H14	4521397	#N/A	rp
FAUX	MFCD00027233@15.512-rp	MFCD00027233	146.109	15.512	C11H14	4521397	#N/A	rp
FAUX	MFCD00027233@17.818-rp	MFCD00027233	146.109	17.818	C11H14	4521397	#N/A	rp
FAUX	146.42196@7.696-rp	#N/A	146.422	7.696	#N/A	#N/A	#N/A	rp
FAUX	146.54815@1.096-rp	#N/A	146.548	1.096	#N/A	#N/A	#N/A	rp
FAUX	146.58004@6.424-rp	#N/A	146.58	6.424	#N/A	#N/A	#N/A	rp
FAUX	146.58677@1.227-rp	#N/A	146.587	1.227	#N/A	#N/A	#N/A	rp
FAUX	146.587@6.737-rp	#N/A	146.587	6.737	#N/A	#N/A	#N/A	rp
FAUX	146.60515@6.826-rp	#N/A	146.605	6.826	#N/A	#N/A	#N/A	rp
FAUX	146.60517@7.145-rp	#N/A	146.605	7.145	#N/A	#N/A	#N/A	rp
FAUX	146.99675@1.084-rp	#N/A	146.997	1.084	#N/A	#N/A	#N/A	rp
FAUX	147.00861@1.644-rp	#N/A	147.009	1.644	C4H6NO3P	#N/A	#N/A	rp
FAUX	147.00946@1.64-rp	#N/A	147.009	1.64	#N/A	#N/A	#N/A	rp
FAUX	Indole-5,6-quinone@8.088-rp	Indole-5,6-quinone	147.032	8.088	C8H5NO2	389600	Metabolic pathways;Tyrosine metabolism	rp
FAUX	Indole-5,6-quinone@3.22-rp	Indole-5,6-quinone	147.032	3.22	C8H5NO2	389600	Metabolic pathways;Tyrosine metabolism	rp
FAUX	3-Thiomorpholinecarboxylicacid@1.362-rp	3-Thiomorpholinecarboxylicacid	147.035	1.362	C5H9NO2S	389150	#N/A	rp
FAUX	2-oxo-4-hydroxy-5-aminovalericacid@1.317-rp	2-oxo-4-hydroxy-5-aminovalericacid	147.053	1.317	C5H9NO4	#N/A	Metabolic pathways;Biosynthesis of secondary metabolites;Microbial metabolism in diverse environments;Biosynthesis of plant secondary metabolites;2-Oxocarboxylic acid metabolism;Biosynthesis of amino acids;ABC transporters;Arginine and proline metabolism;Other	rp
FAUX	2-oxo-4-hydroxy-5-aminovalericacid@1.11-rp	2-oxo-4-hydroxy-5-aminovalericacid	147.053	1.11	C5H9NO4	#N/A	Metabolic pathways;Biosynthesis of secondary metabolites;Microbial metabolism in diverse environments;Biosynthesis of plant secondary metabolites;2-Oxocarboxylic acid metabolism;Biosynthesis of amino acids;ABC transporters;Arginine and proline metabolism;Other	rp
FAUX	Albizziin@1.214-rp	Albizziin	147.065	1.214	C4H9N3O3	83855	#N/A	rp
FAUX	Indole-3-methanol@7.099-rp	Indole-3-methanol	147.068	7.099	C9H9NO	#N/A	#N/A	rp
FAUX	Indole-3-methanol@7.356-rp	Indole-3-methanol	147.069	7.356	C9H9NO	#N/A	#N/A	rp
FAUX	Indole-3-methanol@1.995-rp	Indole-3-methanol	147.069	1.995	C9H9NO	#N/A	#N/A	rp
FAUX	N-hydroxyisoleucine@1.136-rp	N-hydroxyisoleucine	147.089	1.136	C6H13NO3	#N/A	Biosynthesis of secondary metabolites;Other	rp
FAUX	N-hydroxyisoleucine@1.413-rp	N-hydroxyisoleucine	147.09	1.413	C6H13NO3	#N/A	Biosynthesis of secondary metabolites;Other	rp
FAUX	N-hydroxyisoleucine@3.107-rp	N-hydroxyisoleucine	147.09	3.107	C6H13NO3	#N/A	Biosynthesis of secondary metabolites;Other	rp
FAUX	5-Amino-2-hydrazinopentanoicacid@1.09-rp	5-Amino-2-hydrazinopentanoicacid	147.101	1.09	C5H13N3O2	149435	#N/A	rp
FAUX	L-(N-2---15-N)Lysine@1.104-rp	L-(N-2---15-N)Lysine	147.102	1.104	C6H14N[15]NO2	#N/A	#N/A	rp
FAUX	147.10335@1.087-rp	#N/A	147.103	1.087	#N/A	#N/A	#N/A	rp
FAUX	147.10892@6.51-rp	#N/A	147.109	6.51	#N/A	#N/A	#N/A	rp
FAUX	1,1-Diethoxytrimethylamine@1.185-rp	1,1-Diethoxytrimethylamine	147.126	1.185	C7H17NO2	64076	#N/A	rp
FAUX	147.43009@6.98-rp	#N/A	147.43	6.98	#N/A	#N/A	#N/A	rp
FAUX	4-methylthio-2-oxobutanoicacid@1.188-rp	4-methylthio-2-oxobutanoicacid	148.019	1.188	C5H8O3S	460	Metabolic pathways;Biosynthesis of secondary metabolites;Biosynthesis of plant secondary metabolites;2-Oxocarboxylic acid metabolism;Other	rp
FAUX	148.02236@1.354-rp	#N/A	148.022	1.354	#N/A	#N/A	#N/A	rp
FAUX	2-dehydro-3-deoxyarabinonicacid@1.148-rp	2-dehydro-3-deoxyarabinonicacid	148.037	1.148	C5H8O5	#N/A	Metabolic pathways;Microbial metabolism in diverse environments;2-Oxocarboxylic acid metabolism;Biosynthesis of amino acids;Other	rp
FAUX	2-dehydro-3-deoxyarabinonicacid@1.35-rp	2-dehydro-3-deoxyarabinonicacid	148.037	1.35	C5H8O5	#N/A	Metabolic pathways;Microbial metabolism in diverse environments;2-Oxocarboxylic acid metabolism;Biosynthesis of amino acids;Other	rp
FAUX	2-dehydro-3-deoxyarabinonicacid@2.828-rp	2-dehydro-3-deoxyarabinonicacid	148.038	2.828	C5H8O5	#N/A	Metabolic pathways;Microbial metabolism in diverse environments;2-Oxocarboxylic acid metabolism;Biosynthesis of amino acids;Other	rp
FAUX	4-Pteridinol@4.597-rp	4-Pteridinol	148.038	4.597	C6H4N4O	4512407	#N/A	rp
FAUX	4-Pteridinol@2.835-rp	4-Pteridinol	148.039	2.835	C6H4N4O	4512407	#N/A	rp
FAUX	Bis(1-aziridinyl)phosphinicacid@6.606-rp	Bis(1-aziridinyl)phosphinicacid	148.04	6.606	C4H9N2O2P	21378667	#N/A	rp
FAUX	3-hydroxy-1-indanone@7.334-rp	3-hydroxy-1-indanone	148.052	7.334	C9H8O2	#N/A	Metabolic pathways;Biosynthesis of secondary metabolites;Microbial metabolism in diverse environments;Biosynthesis of plant secondary metabolites;Degradation of aromatic compounds;Phenylpropanoid biosynthesis;Biosynthesis of phenylpropanoids;Biosynthesis of alkaloids derived from shikimate pathway;Phenylalanine metabolism;Ubiquinone and other terpenoid-quinone biosynthesis;Biosynthesis of various…	rp
FAUX	3-hydroxy-1-indanone@11.965-rp	3-hydroxy-1-indanone	148.052	11.965	C9H8O2	#N/A	Metabolic pathways;Biosynthesis of secondary metabolites;Microbial metabolism in diverse environments;Biosynthesis of plant secondary metabolites;Degradation of aromatic compounds;Phenylpropanoid biosynthesis;Biosynthesis of phenylpropanoids;Biosynthesis of alkaloids derived from shikimate pathway;Phenylalanine metabolism;Ubiquinone and other terpenoid-quinone biosynthesis;Biosynthesis of various…	rp
FAUX	3-hydroxy-1-indanone@16.308-rp	3-hydroxy-1-indanone	148.052	16.308	C9H8O2	#N/A	Metabolic pathways;Biosynthesis of secondary metabolites;Microbial metabolism in diverse environments;Biosynthesis of plant secondary metabolites;Degradation of aromatic compounds;Phenylpropanoid biosynthesis;Biosynthesis of phenylpropanoids;Biosynthesis of alkaloids derived from shikimate pathway;Phenylalanine metabolism;Ubiquinone and other terpenoid-quinone biosynthesis;Biosynthesis of various…	rp
FAUX	3-hydroxy-1-indanone@16.105-rp	3-hydroxy-1-indanone	148.052	16.105	C9H8O2	#N/A	Metabolic pathways;Biosynthesis of secondary metabolites;Microbial metabolism in diverse environments;Biosynthesis of plant secondary metabolites;Degradation of aromatic compounds;Phenylpropanoid biosynthesis;Biosynthesis of phenylpropanoids;Biosynthesis of alkaloids derived from shikimate pathway;Phenylalanine metabolism;Ubiquinone and other terpenoid-quinone biosynthesis;Biosynthesis of various…	rp
FAUX	3-hydroxy-1-indanone@1.994-rp	3-hydroxy-1-indanone	148.052	1.994	C9H8O2	#N/A	Metabolic pathways;Biosynthesis of secondary metabolites;Microbial metabolism in diverse environments;Biosynthesis of plant secondary metabolites;Degradation of aromatic compounds;Phenylpropanoid biosynthesis;Biosynthesis of phenylpropanoids;Biosynthesis of alkaloids derived from shikimate pathway;Phenylalanine metabolism;Ubiquinone and other terpenoid-quinone biosynthesis;Biosynthesis of various…	rp
FAUX	3-hydroxy-1-indanone@6.28-rp	3-hydroxy-1-indanone	148.053	6.28	C9H8O2	#N/A	Metabolic pathways;Biosynthesis of secondary metabolites;Microbial metabolism in diverse environments;Biosynthesis of plant secondary metabolites;Degradation of aromatic compounds;Phenylpropanoid biosynthesis;Biosynthesis of phenylpropanoids;Biosynthesis of alkaloids derived from shikimate pathway;Phenylalanine metabolism;Ubiquinone and other terpenoid-quinone biosynthesis;Biosynthesis of various…	rp
FAUX	3-hydroxy-1-indanone@7.319-rp	3-hydroxy-1-indanone	148.053	7.319	C9H8O2	#N/A	Metabolic pathways;Biosynthesis of secondary metabolites;Microbial metabolism in diverse environments;Biosynthesis of plant secondary metabolites;Degradation of aromatic compounds;Phenylpropanoid biosynthesis;Biosynthesis of phenylpropanoids;Biosynthesis of alkaloids derived from shikimate pathway;Phenylalanine metabolism;Ubiquinone and other terpenoid-quinone biosynthesis;Biosynthesis of various…	rp
FAUX	3-hydroxy-1-indanone@7.11-rp	3-hydroxy-1-indanone	148.053	7.11	C9H8O2	#N/A	Metabolic pathways;Biosynthesis of secondary metabolites;Microbial metabolism in diverse environments;Biosynthesis of plant secondary metabolites;Degradation of aromatic compounds;Phenylpropanoid biosynthesis;Biosynthesis of phenylpropanoids;Biosynthesis of alkaloids derived from shikimate pathway;Phenylalanine metabolism;Ubiquinone and other terpenoid-quinone biosynthesis;Biosynthesis of various…	rp
FAUX	3-hydroxy-1-indanone@6.823-rp	3-hydroxy-1-indanone	148.053	6.823	C9H8O2	#N/A	Metabolic pathways;Biosynthesis of secondary metabolites;Microbial metabolism in diverse environments;Biosynthesis of plant secondary metabolites;Degradation of aromatic compounds;Phenylpropanoid biosynthesis;Biosynthesis of phenylpropanoids;Biosynthesis of alkaloids derived from shikimate pathway;Phenylalanine metabolism;Ubiquinone and other terpenoid-quinone biosynthesis;Biosynthesis of various…	rp
FAUX	3-hydroxy-1-indanone@8.786-rp	3-hydroxy-1-indanone	148.053	8.786	C9H8O2	#N/A	Metabolic pathways;Biosynthesis of secondary metabolites;Microbial metabolism in diverse environments;Biosynthesis of plant secondary metabolites;Degradation of aromatic compounds;Phenylpropanoid biosynthesis;Biosynthesis of phenylpropanoids;Biosynthesis of alkaloids derived from shikimate pathway;Phenylalanine metabolism;Ubiquinone and other terpenoid-quinone biosynthesis;Biosynthesis of various…	rp
FAUX	2,3-dihydroxy-3-methylpentanoicacid@1.744-rp	2,3-dihydroxy-3-methylpentanoicacid	148.074	1.744	C6H12O4	#N/A	Metabolic pathways;Biosynthesis of secondary metabolites;Biosynthesis of plant secondary metabolites;2-Oxocarboxylic acid metabolism;Biosynthesis of amino acids;Other	rp
FAUX	2,3-dihydroxy-3-methylpentanoicacid@2.227-rp	2,3-dihydroxy-3-methylpentanoicacid	148.074	2.227	C6H12O4	#N/A	Metabolic pathways;Biosynthesis of secondary metabolites;Biosynthesis of plant secondary metabolites;2-Oxocarboxylic acid metabolism;Biosynthesis of amino acids;Other	rp
FAUX	2,3-dihydroxy-3-methylpentanoicacid@1.791-rp	2,3-dihydroxy-3-methylpentanoicacid	148.074	1.791	C6H12O4	#N/A	Metabolic pathways;Biosynthesis of secondary metabolites;Biosynthesis of plant secondary metabolites;2-Oxocarboxylic acid metabolism;Biosynthesis of amino acids;Other	rp
FAUX	148.10204@7.044-rp	#N/A	148.102	7.044	C7H17OP	#N/A	#N/A	rp
FAUX	n-Amylbenzene@17.815-rp	n-Amylbenzene	148.125	17.815	C11H16	10404	#N/A	rp
FAUX	n-Amylbenzene@13.96-rp	n-Amylbenzene	148.125	13.96	C11H16	10404	#N/A	rp
FAUX	n-Amylbenzene@12.834-rp	n-Amylbenzene	148.125	12.834	C11H16	10404	#N/A	rp
FAUX	n-Amylbenzene@15.095-rp	n-Amylbenzene	148.125	15.095	C11H16	10404	#N/A	rp
FAUX	n-Amylbenzene@16.226-rp	n-Amylbenzene	148.125	16.226	C11H16	10404	#N/A	rp
FAUX	148.12618@13.426-rp	#N/A	148.126	13.426	#N/A	#N/A	#N/A	rp
FAUX	148.12623@13.961-rp	#N/A	148.126	13.961	#N/A	#N/A	#N/A	rp
FAUX	148.51852@1.099-rp	#N/A	148.519	1.099	#N/A	#N/A	#N/A	rp
FAUX	148.59011@6.462-rp	#N/A	148.59	6.462	#N/A	#N/A	#N/A	rp
FAUX	149.00674@1.064-rp	#N/A	149.007	1.064	C2H3N3O5	#N/A	#N/A	rp
FAUX	2,3-dihydroxyindole@1.542-rp	2,3-dihydroxyindole	149.048	1.542	C8H7NO2	#N/A	Metabolic pathways;Biosynthesis of secondary metabolites;Tryptophan metabolism;Tyrosine metabolism;Other	rp
FAUX	2,3-dihydroxyindole@5.695-rp	2,3-dihydroxyindole	149.048	5.695	C8H7NO2	#N/A	Metabolic pathways;Biosynthesis of secondary metabolites;Tryptophan metabolism;Tyrosine metabolism;Other	rp
FAUX	Penicillamine@5.129-rp	Penicillamine	149.051	5.129	C5H11NO2S	5643	Metabolic pathways;Biosynthesis of secondary metabolites;Biosynthesis of plant secondary metabolites;2-Oxocarboxylic acid metabolism;Biosynthesis of amino acids;ABC transporters;Other	rp
FAUX	Methionine@1.308-rp	Methionine	149.051	1.308	C5H11NO2S	#N/A	Metabolic pathways;Biosynthesis of secondary metabolites;Biosynthesis of plant secondary metabolites;2-Oxocarboxylic acid metabolism;Biosynthesis of amino acids;ABC transporters;Other	rp
FAUX	Penicillamine@4.566-rp	Penicillamine	149.051	4.566	C5H11NO2S	5643	Metabolic pathways;Biosynthesis of secondary metabolites;Biosynthesis of plant secondary metabolites;2-Oxocarboxylic acid metabolism;Biosynthesis of amino acids;ABC transporters;Other	rp
FAUX	Penicillamine@3.42-rp	Penicillamine	149.051	3.42	C5H11NO2S	5643	Metabolic pathways;Biosynthesis of secondary metabolites;Biosynthesis of plant secondary metabolites;2-Oxocarboxylic acid metabolism;Biosynthesis of amino acids;ABC transporters;Other	rp
FAUX	5-Fluoro-3-methylindole@1.114-rp	5-Fluoro-3-methylindole	149.064	1.114	C9H8FN	19085763	#N/A	rp
FAUX	N,N-dihydroxyvaline@1.108-rp	N,N-dihydroxyvaline	149.069	1.108	C5H11NO4	#N/A	Metabolic pathways;Biosynthesis of secondary metabolites;Other	rp
FAUX	1-methyladenine@1.369-rp	1-methyladenine	149.07	1.369	C6H7N5	#N/A	#N/A	rp
FAUX	149.08199@6.631-rp	#N/A	149.082	6.631	#N/A	#N/A	#N/A	rp
FAUX	149.08248@1.103-rp	#N/A	149.082	1.103	C3H12N5P	#N/A	#N/A	rp
FAUX	3-phenylpropionaldoxim@5.11-rp	3-phenylpropionaldoxim	149.084	5.11	C9H11NO	#N/A	Metabolic pathways;2-Oxocarboxylic acid metabolism;Biosynthesis of alkaloids derived from shikimate pathway;Phenylalanine metabolism;Other	rp
FAUX	149.10422@1.094-rp	#N/A	149.104	1.094	#N/A	#N/A	#N/A	rp
FAUX	149.51592@6.4-rp	#N/A	149.516	6.4	#N/A	#N/A	#N/A	rp
FAUX	149.59787@1.761-rp	#N/A	149.598	1.761	#N/A	#N/A	#N/A	rp
FAUX	2-carboxybenzaldehyde@3.507-rp	2-carboxybenzaldehyde	150.032	3.507	C8H6O3	#N/A	Metabolic pathways;Microbial metabolism in diverse environments;Phenylalanine metabolism;Aminobenzoate degradation;Other	rp
FAUX	2-carboxybenzaldehyde@5.336-rp	2-carboxybenzaldehyde	150.032	5.336	C8H6O3	#N/A	Metabolic pathways;Microbial metabolism in diverse environments;Phenylalanine metabolism;Aminobenzoate degradation;Other	rp
FAUX	2-carboxybenzaldehyde@6.216-rp	2-carboxybenzaldehyde	150.032	6.216	C8H6O3	#N/A	Metabolic pathways;Microbial metabolism in diverse environments;Phenylalanine metabolism;Aminobenzoate degradation;Other	rp
FAUX	2-carboxybenzaldehyde@6.972-rp	2-carboxybenzaldehyde	150.032	6.972	C8H6O3	#N/A	Metabolic pathways;Microbial metabolism in diverse environments;Phenylalanine metabolism;Aminobenzoate degradation;Other	rp
FAUX	Desmeninol@2.967-rp	Desmeninol	150.035	2.967	C5H10O3S	10946	#N/A	rp
FAUX	Arabinose@1.183-rp	Arabinose	150.053	1.183	C5H10O5	59687	Metabolic pathways;ABC transporters;Other	rp
FAUX	1-methylhypoxanthine@1.192-rp	1-methylhypoxanthine	150.054	1.192	C6H6N4O	63930	#N/A	rp
FAUX	1-methylhypoxanthine@4.348-rp	1-methylhypoxanthine	150.054	4.348	C6H6N4O	63930	#N/A	rp
FAUX	1-methylhypoxanthine@5.787-rp	1-methylhypoxanthine	150.054	5.787	C6H6N4O	63930	#N/A	rp
FAUX	1-methylhypoxanthine@4.048-rp	1-methylhypoxanthine	150.054	4.048	C6H6N4O	63930	#N/A	rp
FAUX	4-fluoro-6-methylbenzimidazole@3.083-rp	4-fluoro-6-methylbenzimidazole	150.059	3.083	C8H7FN2	9139887	#N/A	rp
FAUX	3-methoxyacetophenone@13.216-rp	3-methoxyacetophenone	150.068	13.216	C9H10O2	#N/A	Metabolic pathways;Biosynthesis of secondary metabolites;Microbial metabolism in diverse environments;Degradation of aromatic compounds;Phenylpropanoid biosynthesis;Biosynthesis of phenylpropanoids;Biosynthesis of alkaloids derived from shikimate pathway;Phenylalanine metabolism;Other	rp
FAUX	3-methoxyacetophenone@12.226-rp	3-methoxyacetophenone	150.068	12.226	C9H10O2	#N/A	Metabolic pathways;Biosynthesis of secondary metabolites;Microbial metabolism in diverse environments;Degradation of aromatic compounds;Phenylpropanoid biosynthesis;Biosynthesis of phenylpropanoids;Biosynthesis of alkaloids derived from shikimate pathway;Phenylalanine metabolism;Other	rp
FAUX	3-methoxyacetophenone@14.983-rp	3-methoxyacetophenone	150.068	14.983	C9H10O2	#N/A	Metabolic pathways;Biosynthesis of secondary metabolites;Microbial metabolism in diverse environments;Degradation of aromatic compounds;Phenylpropanoid biosynthesis;Biosynthesis of phenylpropanoids;Biosynthesis of alkaloids derived from shikimate pathway;Phenylalanine metabolism;Other	rp
FAUX	3-methoxyacetophenone@17.981-rp	3-methoxyacetophenone	150.068	17.981	C9H10O2	#N/A	Metabolic pathways;Biosynthesis of secondary metabolites;Microbial metabolism in diverse environments;Degradation of aromatic compounds;Phenylpropanoid biosynthesis;Biosynthesis of phenylpropanoids;Biosynthesis of alkaloids derived from shikimate pathway;Phenylalanine metabolism;Other	rp
FAUX	3-methoxyacetophenone@18.539-rp	3-methoxyacetophenone	150.068	18.539	C9H10O2	#N/A	Metabolic pathways;Biosynthesis of secondary metabolites;Microbial metabolism in diverse environments;Degradation of aromatic compounds;Phenylpropanoid biosynthesis;Biosynthesis of phenylpropanoids;Biosynthesis of alkaloids derived from shikimate pathway;Phenylalanine metabolism;Other	rp
FAUX	3-methoxyacetophenone@15.676-rp	3-methoxyacetophenone	150.068	15.676	C9H10O2	#N/A	Metabolic pathways;Biosynthesis of secondary metabolites;Microbial metabolism in diverse environments;Degradation of aromatic compounds;Phenylpropanoid biosynthesis;Biosynthesis of phenylpropanoids;Biosynthesis of alkaloids derived from shikimate pathway;Phenylalanine metabolism;Other	rp
FAUX	150.08821@1.114-rp	#N/A	150.088	1.114	#N/A	#N/A	#N/A	rp
FAUX	6,7-Dihydro-5H-cyclopenta[d]pyrimidine-2,4-diamine@1.104-rp	6,7-Dihydro-5H-cyclopenta[d]pyrimidine-2,4-diamine	150.09	1.104	C7H10N4	200996	#N/A	rp
FAUX	Carvacrol@17.814-rp	Carvacrol	150.104	17.814	C10H14O	21105867	Metabolic pathways;Biosynthesis of secondary metabolites;Microbial metabolism in diverse environments;Degradation of aromatic compounds;Other	rp
FAUX	Carvacrol@9.072-rp	Carvacrol	150.105	9.072	C10H14O	21105867	Metabolic pathways;Biosynthesis of secondary metabolites;Microbial metabolism in diverse environments;Degradation of aromatic compounds;Other	rp
FAUX	Carvacrol@9.509-rp	Carvacrol	150.105	9.509	C10H14O	21105867	Metabolic pathways;Biosynthesis of secondary metabolites;Microbial metabolism in diverse environments;Degradation of aromatic compounds;Other	rp
FAUX	1-Methyladamantane@15.525-rp	1-Methyladamantane	150.141	15.525	C11H18	120374	#N/A	rp
FAUX	150.61823@1.148-rp	#N/A	150.618	1.148	#N/A	#N/A	#N/A	rp
FAUX	151.00186@1.86-rp	#N/A	151.002	1.86	C5HN3O3	#N/A	#N/A	rp
FAUX	3-(Methylsulfinyl)-L-alanine@1.476-rp	3-(Methylsulfinyl)-L-alanine	151.03	1.476	C4H9NO3S	158377	#N/A	rp
FAUX	Guanine@2.713-rp	Guanine	151.049	2.713	C5H5N5O	744	Metabolic pathways;Other	rp
FAUX	Guanine@2.044-rp	Guanine	151.049	2.044	C5H5N5O	744	Metabolic pathways;Other	rp
FAUX	Guanine@3.433-rp	Guanine	151.049	3.433	C5H5N5O	744	Metabolic pathways;Other	rp
FAUX	Guanine@4.023-rp	Guanine	151.049	4.023	C5H5N5O	744	Metabolic pathways;Other	rp
FAUX	Guanine@5.248-rp	Guanine	151.049	5.248	C5H5N5O	744	Metabolic pathways;Other	rp
FAUX	Guanine@6.311-rp	Guanine	151.049	6.311	C5H5N5O	744	Metabolic pathways;Other	rp
FAUX	Guanine@5.7-rp	Guanine	151.049	5.7	C5H5N5O	744	Metabolic pathways;Other	rp
FAUX	151.05041@2.708-rp	#N/A	151.05	2.708	C3H10N3O2P	#N/A	#N/A	rp
FAUX	151.06189@1.505-rp	#N/A	151.062	1.505	#N/A	#N/A	#N/A	rp
FAUX	2-amino-3-methylbenzoicacid@5.642-rp	2-amino-3-methylbenzoicacid	151.063	5.642	C8H9NO2	#N/A	Metabolic pathways;Biosynthesis of secondary metabolites;Microbial metabolism in diverse environments;2-Oxocarboxylic acid metabolism;Biosynthesis of alkaloids derived from shikimate pathway;Bile secretion;Aminobenzoate degradation;Other	rp
FAUX	2-amino-3-methylbenzoicacid@6.68-rp	2-amino-3-methylbenzoicacid	151.063	6.68	C8H9NO2	#N/A	Metabolic pathways;Biosynthesis of secondary metabolites;Microbial metabolism in diverse environments;2-Oxocarboxylic acid metabolism;Biosynthesis of alkaloids derived from shikimate pathway;Bile secretion;Aminobenzoate degradation;Other	rp
FAUX	2-amino-3-methylbenzoicacid@2.361-rp	2-amino-3-methylbenzoicacid	151.063	2.361	C8H9NO2	#N/A	Metabolic pathways;Biosynthesis of secondary metabolites;Microbial metabolism in diverse environments;2-Oxocarboxylic acid metabolism;Biosynthesis of alkaloids derived from shikimate pathway;Bile secretion;Aminobenzoate degradation;Other	rp
FAUX	2-amino-3-methylbenzoicacid@1.546-rp	2-amino-3-methylbenzoicacid	151.063	1.546	C8H9NO2	#N/A	Metabolic pathways;Biosynthesis of secondary metabolites;Microbial metabolism in diverse environments;2-Oxocarboxylic acid metabolism;Biosynthesis of alkaloids derived from shikimate pathway;Bile secretion;Aminobenzoate degradation;Other	rp
FAUX	2-amino-3-methylbenzoicacid@1.996-rp	2-amino-3-methylbenzoicacid	151.063	1.996	C8H9NO2	#N/A	Metabolic pathways;Biosynthesis of secondary metabolites;Microbial metabolism in diverse environments;2-Oxocarboxylic acid metabolism;Biosynthesis of alkaloids derived from shikimate pathway;Bile secretion;Aminobenzoate degradation;Other	rp
FAUX	2-amino-3-methylbenzoicacid@1.099-rp	2-amino-3-methylbenzoicacid	151.064	1.099	C8H9NO2	#N/A	Metabolic pathways;Biosynthesis of secondary metabolites;Microbial metabolism in diverse environments;2-Oxocarboxylic acid metabolism;Biosynthesis of alkaloids derived from shikimate pathway;Bile secretion;Aminobenzoate degradation;Other	rp
FAUX	151.06892@1.309-rp	#N/A	151.069	1.309	#N/A	#N/A	#N/A	rp
FAUX	151.06903@6.536-rp	#N/A	151.069	6.536	#N/A	#N/A	#N/A	rp
FAUX	151.07108@8.751-rp	#N/A	151.071	8.751	#N/A	#N/A	#N/A	rp
FAUX	2-(4-Fluorophenyl)cyclopropanamine@1.514-rp	2-(4-Fluorophenyl)cyclopropanamine	151.08	1.514	C9H10FN	11209853	#N/A	rp
FAUX	151.09672@1.087-rp	#N/A	151.097	1.087	#N/A	#N/A	#N/A	rp
FAUX	151.0978@1.102-rp	#N/A	151.098	1.102	#N/A	#N/A	#N/A	rp
FAUX	151.10333@6.803-rp	#N/A	151.103	6.803	#N/A	#N/A	#N/A	rp
FAUX	151.10346@0.93-rp	#N/A	151.103	0.93	#N/A	#N/A	#N/A	rp
FAUX	151.43012@6.785-rp	#N/A	151.43	6.785	#N/A	#N/A	#N/A	rp
FAUX	151.57156@1.098-rp	#N/A	151.572	1.098	#N/A	#N/A	#N/A	rp
FAUX	151.57704@1.107-rp	#N/A	151.577	1.107	#N/A	#N/A	#N/A	rp
FAUX	Hydroxyphosphinylpyruvicacid@1.206-rp	Hydroxyphosphinylpyruvicacid	151.988	1.206	C3H5O5P	#N/A	Biosynthesis of secondary metabolites;Other	rp
FAUX	3,4-Dioxo-1,5-cyclohexadiene-1-carboxylicacid@7.763-rp	3,4-Dioxo-1,5-cyclohexadiene-1-carboxylicacid	152.011	7.763	C7H4O4	137883	#N/A	rp
FAUX	3-(Methylsulfonyl)propanoicacid@1.473-rp	3-(Methylsulfonyl)propanoicacid	152.014	1.473	C4H8O4S	107401	#N/A	rp
FAUX	152.0186@6.452-rp	#N/A	152.019	6.452	CH4N4O5	#N/A	#N/A	rp
FAUX	152.0275@2.371-rp	#N/A	152.028	2.371	C3H10N2OP2	#N/A	#N/A	rp
FAUX	Alloxanthine@3.314-rp	Alloxanthine	152.033	3.314	C5H4N4O2	#N/A	Metabolic pathways;Biosynthesis of secondary metabolites;Microbial metabolism in diverse environments;Biosynthesis of plant secondary metabolites;Other	rp
FAUX	Alloxanthine@3.96-rp	Alloxanthine	152.033	3.96	C5H4N4O2	#N/A	Metabolic pathways;Biosynthesis of secondary metabolites;Microbial metabolism in diverse environments;Biosynthesis of plant secondary metabolites;Other	rp
FAUX	Alloxanthine@1.676-rp	Alloxanthine	152.033	1.676	C5H4N4O2	#N/A	Metabolic pathways;Biosynthesis of secondary metabolites;Microbial metabolism in diverse environments;Biosynthesis of plant secondary metabolites;Other	rp
FAUX	Alloxanthine@2.485-rp	Alloxanthine	152.033	2.485	C5H4N4O2	#N/A	Metabolic pathways;Biosynthesis of secondary metabolites;Microbial metabolism in diverse environments;Biosynthesis of plant secondary metabolites;Other	rp
FAUX	Alloxanthine@4.139-rp	Alloxanthine	152.033	4.139	C5H4N4O2	#N/A	Metabolic pathways;Biosynthesis of secondary metabolites;Microbial metabolism in diverse environments;Biosynthesis of plant secondary metabolites;Other	rp
FAUX	Alloxanthine@5.621-rp	Alloxanthine	152.034	5.621	C5H4N4O2	#N/A	Metabolic pathways;Biosynthesis of secondary metabolites;Microbial metabolism in diverse environments;Biosynthesis of plant secondary metabolites;Other	rp
FAUX	8-Azaguanine@4.757-rp	8-Azaguanine	152.044	4.757	C4H4N6O	8325	#N/A	rp
FAUX	2-hydroxyphenylaceticacid@7.566-rp	2-hydroxyphenylaceticacid	152.047	7.566	C8H8O3	#N/A	Metabolic pathways;Biosynthesis of secondary metabolites;Microbial metabolism in diverse environments;Degradation of aromatic compounds;Biosynthesis of phenylpropanoids;Biosynthesis of alkaloids derived from shikimate pathway;Phenylalanine metabolism;Tyrosine metabolism;Biosynthesis of various secondary metabolites - part 2;Aminobenzoate degradation;Other	rp
FAUX	2-hydroxyphenylaceticacid@8.305-rp	2-hydroxyphenylaceticacid	152.047	8.305	C8H8O3	#N/A	Metabolic pathways;Biosynthesis of secondary metabolites;Microbial metabolism in diverse environments;Degradation of aromatic compounds;Biosynthesis of phenylpropanoids;Biosynthesis of alkaloids derived from shikimate pathway;Phenylalanine metabolism;Tyrosine metabolism;Biosynthesis of various secondary metabolites - part 2;Aminobenzoate degradation;Other	rp
FAUX	2-hydroxyphenylaceticacid@5.924-rp	2-hydroxyphenylaceticacid	152.047	5.924	C8H8O3	#N/A	Metabolic pathways;Biosynthesis of secondary metabolites;Microbial metabolism in diverse environments;Degradation of aromatic compounds;Biosynthesis of phenylpropanoids;Biosynthesis of alkaloids derived from shikimate pathway;Phenylalanine metabolism;Tyrosine metabolism;Biosynthesis of various secondary metabolites - part 2;Aminobenzoate degradation;Other	rp
FAUX	2-hydroxyphenylaceticacid@9.884-rp	2-hydroxyphenylaceticacid	152.047	9.884	C8H8O3	#N/A	Metabolic pathways;Biosynthesis of secondary metabolites;Microbial metabolism in diverse environments;Degradation of aromatic compounds;Biosynthesis of phenylpropanoids;Biosynthesis of alkaloids derived from shikimate pathway;Phenylalanine metabolism;Tyrosine metabolism;Biosynthesis of various secondary metabolites - part 2;Aminobenzoate degradation;Other	rp
FAUX	2-hydroxyphenylaceticacid@6.063-rp	2-hydroxyphenylaceticacid	152.047	6.063	C8H8O3	#N/A	Metabolic pathways;Biosynthesis of secondary metabolites;Microbial metabolism in diverse environments;Degradation of aromatic compounds;Biosynthesis of phenylpropanoids;Biosynthesis of alkaloids derived from shikimate pathway;Phenylalanine metabolism;Tyrosine metabolism;Biosynthesis of various secondary metabolites - part 2;Aminobenzoate degradation;Other	rp
FAUX	2-hydroxyphenylaceticacid@5.357-rp	2-hydroxyphenylaceticacid	152.048	5.357	C8H8O3	#N/A	Metabolic pathways;Biosynthesis of secondary metabolites;Microbial metabolism in diverse environments;Degradation of aromatic compounds;Biosynthesis of phenylpropanoids;Biosynthesis of alkaloids derived from shikimate pathway;Phenylalanine metabolism;Tyrosine metabolism;Biosynthesis of various secondary metabolites - part 2;Aminobenzoate degradation;Other	rp
FAUX	2-amino-4-nitrotoluene@3.617-rp	2-amino-4-nitrotoluene	152.059	3.617	C7H8N2O2	#N/A	Metabolic pathways;Microbial metabolism in diverse environments;Other	rp
FAUX	2-amino-4-nitrotoluene@4.476-rp	2-amino-4-nitrotoluene	152.059	4.476	C7H8N2O2	#N/A	Metabolic pathways;Microbial metabolism in diverse environments;Other	rp
FAUX	2-amino-4-nitrotoluene@1.09-rp	2-amino-4-nitrotoluene	152.059	1.09	C7H8N2O2	#N/A	Metabolic pathways;Microbial metabolism in diverse environments;Other	rp
FAUX	Arabitol@1.124-rp	Arabitol	152.069	1.124	C5H12O5	#N/A	Metabolic pathways;ABC transporters;Other	rp
FAUX	152.08744@1.094-rp	#N/A	152.087	1.094	#N/A	#N/A	#N/A	rp
FAUX	2-methyl-5-isopropylhexadienal@17.817-rp	2-methyl-5-isopropylhexadienal	152.12	17.817	C10H16O	#N/A	Biosynthesis of secondary metabolites;Degradation of aromatic compounds;Other	rp
FAUX	152.77393@6.91-rp	#N/A	152.774	6.91	#N/A	#N/A	#N/A	rp
FAUX	152.77394@7.101-rp	#N/A	152.774	7.101	#N/A	#N/A	#N/A	rp
FAUX	Thiocysteine@1.572-rp	Thiocysteine	152.992	1.572	C3H7NO2S2	#N/A	Metabolic pathways;Other	rp
FAUX	Sulfinoalanine@1.239-rp	Sulfinoalanine	153.01	1.239	C3H7NO4S	#N/A	Metabolic pathways;Other	rp
FAUX	Sulfinoalanine@1.473-rp	Sulfinoalanine	153.01	1.473	C3H7NO4S	#N/A	Metabolic pathways;Other	rp
FAUX	153.01733@2.487-rp	#N/A	153.017	2.487	C5H3N3O3	#N/A	#N/A	rp
FAUX	FOSAMINE@6.085-rp	FOSAMINE	153.019	6.085	C3H8NO4P	30725	#N/A	rp
FAUX	153.02666@7.378-rp	#N/A	153.027	7.378	C3H7NO6	#N/A	#N/A	rp
FAUX	153.02762@1.357-rp	#N/A	153.028	1.357	C3H7NO6	#N/A	#N/A	rp
FAUX	3-hydroxy-2-methylpyridine-5-carboxylicacid@1.287-rp	3-hydroxy-2-methylpyridine-5-carboxylicacid	153.043	1.287	C7H7NO3	#N/A	Metabolic pathways;Biosynthesis of secondary metabolites;Microbial metabolism in diverse environments;Tryptophan metabolism;Aminobenzoate degradation;Other	rp
FAUX	3-hydroxy-2-methylpyridine-5-carboxylicacid@4.47-rp	3-hydroxy-2-methylpyridine-5-carboxylicacid	153.043	4.47	C7H7NO3	#N/A	Metabolic pathways;Biosynthesis of secondary metabolites;Microbial metabolism in diverse environments;Tryptophan metabolism;Aminobenzoate degradation;Other	rp
FAUX	3-hydroxy-2-methylpyridine-5-carboxylicacid@4.676-rp	3-hydroxy-2-methylpyridine-5-carboxylicacid	153.043	4.676	C7H7NO3	#N/A	Metabolic pathways;Biosynthesis of secondary metabolites;Microbial metabolism in diverse environments;Tryptophan metabolism;Aminobenzoate degradation;Other	rp
FAUX	3-hydroxy-2-methylpyridine-5-carboxylicacid@5.178-rp	3-hydroxy-2-methylpyridine-5-carboxylicacid	153.043	5.178	C7H7NO3	#N/A	Metabolic pathways;Biosynthesis of secondary metabolites;Microbial metabolism in diverse environments;Tryptophan metabolism;Aminobenzoate degradation;Other	rp
FAUX	3-hydroxy-2-methylpyridine-5-carboxylicacid@1.533-rp	3-hydroxy-2-methylpyridine-5-carboxylicacid	153.043	1.533	C7H7NO3	#N/A	Metabolic pathways;Biosynthesis of secondary metabolites;Microbial metabolism in diverse environments;Tryptophan metabolism;Aminobenzoate degradation;Other	rp
FAUX	3-hydroxy-2-methylpyridine-5-carboxylicacid@1.882-rp	3-hydroxy-2-methylpyridine-5-carboxylicacid	153.043	1.882	C7H7NO3	#N/A	Metabolic pathways;Biosynthesis of secondary metabolites;Microbial metabolism in diverse environments;Tryptophan metabolism;Aminobenzoate degradation;Other	rp
FAUX	153.05263@1.077-rp	#N/A	153.053	1.077	#N/A	#N/A	#N/A	rp
FAUX	Dopamine@1.528-rp	Dopamine	153.079	1.528	C8H11NO2	#N/A	Metabolic pathways;Biosynthesis of secondary metabolites;Biosynthesis of plant secondary metabolites;Biosynthesis of alkaloids derived from shikimate pathway;Bile secretion;Tyrosine metabolism;Biosynthesis of various secondary metabolites - part 2;Other	rp
FAUX	Dopamine@8.206-rp	Dopamine	153.079	8.206	C8H11NO2	#N/A	Metabolic pathways;Biosynthesis of secondary metabolites;Biosynthesis of plant secondary metabolites;Biosynthesis of alkaloids derived from shikimate pathway;Bile secretion;Tyrosine metabolism;Biosynthesis of various secondary metabolites - part 2;Other	rp
FAUX	Dopamine@1.993-rp	Dopamine	153.079	1.993	C8H11NO2	#N/A	Metabolic pathways;Biosynthesis of secondary metabolites;Biosynthesis of plant secondary metabolites;Biosynthesis of alkaloids derived from shikimate pathway;Bile secretion;Tyrosine metabolism;Biosynthesis of various secondary metabolites - part 2;Other	rp
FAUX	153.08861@1.282-rp	#N/A	153.089	1.282	#N/A	#N/A	#N/A	rp
FAUX	2,4-diamino-6-hydroxylaminotoluene@1.296-rp	2,4-diamino-6-hydroxylaminotoluene	153.09	1.296	C7H11N3O	#N/A	Microbial metabolism in diverse environments;Other	rp
FAUX	2,4-diamino-6-hydroxylaminotoluene@1.518-rp	2,4-diamino-6-hydroxylaminotoluene	153.09	1.518	C7H11N3O	#N/A	Microbial metabolism in diverse environments;Other	rp
FAUX	2,4-diamino-6-hydroxylaminotoluene@5.668-rp	2,4-diamino-6-hydroxylaminotoluene	153.09	5.668	C7H11N3O	#N/A	Microbial metabolism in diverse environments;Other	rp
FAUX	dimethylthioarsinicacid@1.044-rp	dimethylthioarsinicacid	153.944	1.044	C2H7AsOS	21378732	#N/A	rp
FAUX	3-Sulfopropanoicacid@1.175-rp	3-Sulfopropanoicacid	153.994	1.175	C3H6O5S	362571	#N/A	rp
FAUX	Propionylphosphate@1.159-rp	Propionylphosphate	154.003	1.159	C3H7O5P	20171696	Metabolic pathways;Other	rp
FAUX	2-pyrocatechuicacid@4.292-rp	2-pyrocatechuicacid	154.027	4.292	C7H6O4	#N/A	Metabolic pathways;Biosynthesis of secondary metabolites;Microbial metabolism in diverse environments;Degradation of aromatic compounds;Biosynthesis of phenylpropanoids;Tyrosine metabolism;Aminobenzoate degradation;Other	rp
FAUX	2-pyrocatechuicacid@4.632-rp	2-pyrocatechuicacid	154.027	4.632	C7H6O4	#N/A	Metabolic pathways;Biosynthesis of secondary metabolites;Microbial metabolism in diverse environments;Degradation of aromatic compounds;Biosynthesis of phenylpropanoids;Tyrosine metabolism;Aminobenzoate degradation;Other	rp
FAUX	154.03554@1.079-rp	#N/A	154.036	1.079	#N/A	#N/A	#N/A	rp
FAUX	Acipimox@3.88-rp	Acipimox	154.038	3.88	C6H6N2O3	4470534	Metabolic pathways;Other	rp
FAUX	Acipimox@1.515-rp	Acipimox	154.038	1.515	C6H6N2O3	4470534	Metabolic pathways;Other	rp
FAUX	Hydroxytyrosol@17.63-rp	Hydroxytyrosol	154.063	17.63	C8H10O3	74680	Microbial metabolism in diverse environments;Aminobenzoate degradation	rp
FAUX	Hydroxytyrosol@2.241-rp	Hydroxytyrosol	154.063	2.241	C8H10O3	74680	Microbial metabolism in diverse environments;Aminobenzoate degradation	rp
FAUX	154.06559@6.543-rp	#N/A	154.066	6.543	C7H11N2P	#N/A	#N/A	rp
FAUX	154.07192@1.027-rp	#N/A	154.072	1.027	C3H6N8	#N/A	#N/A	rp
FAUX	N,N?-Methylenebisacrylamide@2.723-rp	N,N?-Methylenebisacrylamide	154.074	2.723	C7H10N2O2	7750	#N/A	rp
FAUX	N,N?-Methylenebisacrylamide@1.295-rp	N,N?-Methylenebisacrylamide	154.074	1.295	C7H10N2O2	7750	#N/A	rp
FAUX	N,N?-Methylenebisacrylamide@1.877-rp	N,N?-Methylenebisacrylamide	154.074	1.877	C7H10N2O2	7750	#N/A	rp
FAUX	N,N?-Methylenebisacrylamide@1.528-rp	N,N?-Methylenebisacrylamide	154.074	1.528	C7H10N2O2	7750	#N/A	rp
FAUX	Biphenyl@6.638-rp	Biphenyl	154.078	6.638	C12H10	6828	Metabolic pathways;Microbial metabolism in diverse environments;Degradation of aromatic compounds;Other	rp
FAUX	RI2735000@15.529-rp	RI2735000	154.099	15.529	C9H14O2	7801	#N/A	rp
FAUX	Milameline@1.082-rp	Milameline	154.111	1.082	C8H14N2O	7845468	#N/A	rp
FAUX	Milameline@7.127-rp	Milameline	154.111	7.127	C8H14N2O	7845468	#N/A	rp
FAUX	154.58396@1.132-rp	#N/A	154.584	1.132	#N/A	#N/A	#N/A	rp
FAUX	3-Aminopropylhydrogensulfate@1.107-rp	3-Aminopropylhydrogensulfate	155.025	1.107	C3H9NO4S	259424	#N/A	rp
FAUX	Carbapenam-3-carboxylicacid@1.63-rp	Carbapenam-3-carboxylicacid	155.058	1.63	C7H9NO3	#N/A	Metabolic pathways;Biosynthesis of secondary metabolites;Other	rp
FAUX	Carbapenam-3-carboxylicacid@1.277-rp	Carbapenam-3-carboxylicacid	155.058	1.277	C7H9NO3	#N/A	Metabolic pathways;Biosynthesis of secondary metabolites;Other	rp
FAUX	DL-Histidine@6.202-rp	DL-Histidine	155.069	6.202	C6H9N3O2	752	Metabolic pathways;Biosynthesis of secondary metabolites;Biosynthesis of plant secondary metabolites;Biosynthesis of amino acids;ABC transporters;Other	rp
FAUX	DL-Histidine@6.621-rp	DL-Histidine	155.07	6.621	C6H9N3O2	752	Metabolic pathways;Biosynthesis of secondary metabolites;Biosynthesis of plant secondary metabolites;Biosynthesis of amino acids;ABC transporters;Other	rp
FAUX	DL-Histidine@5.547-rp	DL-Histidine	155.07	5.547	C6H9N3O2	752	Metabolic pathways;Biosynthesis of secondary metabolites;Biosynthesis of plant secondary metabolites;Biosynthesis of amino acids;ABC transporters;Other	rp
FAUX	DL-Histidine@6.431-rp	DL-Histidine	155.07	6.431	C6H9N3O2	752	Metabolic pathways;Biosynthesis of secondary metabolites;Biosynthesis of plant secondary metabolites;Biosynthesis of amino acids;ABC transporters;Other	rp
FAUX	Histidine@1.083-rp	Histidine	155.07	1.083	C6H9N3O2	#N/A	Metabolic pathways;Biosynthesis of secondary metabolites;Biosynthesis of plant secondary metabolites;Biosynthesis of amino acids;ABC transporters;Other	rp
FAUX	2-Isopropyl-4,5-dimethyl-1,3-thiazole@1.733-rp	2-Isopropyl-4,5-dimethyl-1,3-thiazole	155.076	1.733	C8H13NS	37256	#N/A	rp
FAUX	2-Isopropyl-4,5-dimethyl-1,3-thiazole@6.762-rp	2-Isopropyl-4,5-dimethyl-1,3-thiazole	155.077	6.762	C8H13NS	37256	#N/A	rp
FAUX	1-ethyl-3-[3-(dimethylamino)propyl]carbodiimide@1.07-rp	1-ethyl-3-[3-(dimethylamino)propyl]carbodiimide	155.142	1.07	C8H17N3	15119	#N/A	rp
FAUX	155.53794@6.396-rp	#N/A	155.538	6.396	#N/A	#N/A	#N/A	rp
FAUX	155.58527@5.668-rp	#N/A	155.585	5.668	#N/A	#N/A	#N/A	rp
FAUX	155.58532@6.48-rp	#N/A	155.585	6.48	#N/A	#N/A	#N/A	rp
FAUX	155.5854@6.593-rp	#N/A	155.585	6.593	#N/A	#N/A	#N/A	rp
FAUX	155.58542@0.923-rp	#N/A	155.585	0.923	#N/A	#N/A	#N/A	rp
FAUX	155.76185@7.011-rp	#N/A	155.762	7.011	#N/A	#N/A	#N/A	rp
FAUX	2,3,5-trithiahexane-5-oxide@1.644-rp	2,3,5-trithiahexane-5-oxide	155.973	1.644	C3H8OS3	52085727	#N/A	rp
FAUX	155.97483@1.342-rp	#N/A	155.975	1.342	C3H2N4P2	#N/A	#N/A	rp
FAUX	3-sulfopropanediol@1.208-rp	3-sulfopropanediol	156.01	1.208	C3H8O5S	100440	#N/A	rp
FAUX	Oroticacid@1.54-rp	Oroticacid	156.017	1.54	C5H4N2O4	942	Metabolic pathways;Other	rp
FAUX	156.0272@1.353-rp	#N/A	156.027	1.353	C3H8O7	#N/A	#N/A	rp
FAUX	156.02734@0.952-rp	#N/A	156.027	0.952	C3H8O7	#N/A	#N/A	rp
FAUX	156.0387@0.934-rp	#N/A	156.039	0.934	C2H8N2O6	#N/A	#N/A	rp
FAUX	2,3-dihydro-2,3-dihydroxybenzoicacid@1.241-rp	2,3-dihydro-2,3-dihydroxybenzoicacid	156.042	1.241	C7H8O4	#N/A	Metabolic pathways;Biosynthesis of secondary metabolites;Microbial metabolism in diverse environments;Degradation of aromatic compounds;Other	rp
FAUX	2,3-dihydro-2,3-dihydroxybenzoicacid@1.517-rp	2,3-dihydro-2,3-dihydroxybenzoicacid	156.042	1.517	C7H8O4	#N/A	Metabolic pathways;Biosynthesis of secondary metabolites;Microbial metabolism in diverse environments;Degradation of aromatic compounds;Other	rp
FAUX	2,3-dihydro-2,3-dihydroxybenzoicacid@2.673-rp	2,3-dihydro-2,3-dihydroxybenzoicacid	156.042	2.673	C7H8O4	#N/A	Metabolic pathways;Biosynthesis of secondary metabolites;Microbial metabolism in diverse environments;Degradation of aromatic compounds;Other	rp
FAUX	4-imidazolone-5-propanoicacid@1.141-rp	4-imidazolone-5-propanoicacid	156.053	1.141	C6H8N2O3	#N/A	Metabolic pathways;Other	rp
FAUX	4-imidazolone-5-propanoicacid@1.307-rp	4-imidazolone-5-propanoicacid	156.053	1.307	C6H8N2O3	#N/A	Metabolic pathways;Other	rp
FAUX	4-imidazolone-5-propanoicacid@1.484-rp	4-imidazolone-5-propanoicacid	156.054	1.484	C6H8N2O3	#N/A	Metabolic pathways;Other	rp
FAUX	4-imidazolone-5-propanoicacid@1.888-rp	4-imidazolone-5-propanoicacid	156.054	1.888	C6H8N2O3	#N/A	Metabolic pathways;Other	rp
FAUX	156.05444@1.295-rp	#N/A	156.054	1.295	#N/A	#N/A	#N/A	rp
FAUX	156.06651@1.081-rp	#N/A	156.067	1.081	#N/A	#N/A	#N/A	rp
FAUX	Indole-3-acetonitrile@1.519-rp	Indole-3-acetonitrile	156.07	1.519	C10H8N2	#N/A	#N/A	rp
FAUX	2-Carbethoxycyclopentanone@1.78-rp	2-Carbethoxycyclopentanone	156.078	1.78	C8H12O3	62352	#N/A	rp
FAUX	1-Acetyl-L-prolinamide@6.803-rp	1-Acetyl-L-prolinamide	156.09	6.803	C7H12N2O2	77017	#N/A	rp
FAUX	1-Acetyl-L-prolinamide@6.446-rp	1-Acetyl-L-prolinamide	156.09	6.446	C7H12N2O2	77017	#N/A	rp
FAUX	1-Acetyl-L-prolinamide@1.298-rp	1-Acetyl-L-prolinamide	156.09	1.298	C7H12N2O2	77017	#N/A	rp
FAUX	1-Acetyl-L-prolinamide@7.538-rp	1-Acetyl-L-prolinamide	156.09	7.538	C7H12N2O2	77017	#N/A	rp
FAUX	1-Acetyl-L-prolinamide@7.065-rp	1-Acetyl-L-prolinamide	156.09	7.065	C7H12N2O2	77017	#N/A	rp
FAUX	1-Acetyl-L-prolinamide@1.867-rp	1-Acetyl-L-prolinamide	156.09	1.867	C7H12N2O2	77017	#N/A	rp
FAUX	1-Acetyl-L-prolinamide@1.511-rp	1-Acetyl-L-prolinamide	156.09	1.511	C7H12N2O2	77017	#N/A	rp
FAUX	1-Acetyl-L-prolinamide@2.727-rp	1-Acetyl-L-prolinamide	156.09	2.727	C7H12N2O2	77017	#N/A	rp
FAUX	1-Acetyl-L-prolinamide@1.089-rp	1-Acetyl-L-prolinamide	156.09	1.089	C7H12N2O2	77017	#N/A	rp
FAUX	2,6-DIMETHYLNAPHTHALENE@13.629-rp	2,6-DIMETHYLNAPHTHALENE	156.094	13.629	C12H12	10909	#N/A	rp
FAUX	3-(3,3-dimethyl-1-triazenyl)-5-methyl-4,5-dihydroisoxazole@1.091-rp	3-(3,3-dimethyl-1-triazenyl)-5-methyl-4,5-dihydroisoxazole	156.101	1.091	C6H12N4O	10606780	#N/A	rp
FAUX	3-(3,3-dimethyl-1-triazenyl)-5-methyl-4,5-dihydroisoxazole@6.371-rp	3-(3,3-dimethyl-1-triazenyl)-5-methyl-4,5-dihydroisoxazole	156.101	6.371	C6H12N4O	10606780	#N/A	rp
FAUX	N,N-dimethylaminopropylacrylamide@6.786-rp	N,N-dimethylaminopropylacrylamide	156.126	6.786	C8H16N2O	69861	#N/A	rp
FAUX	N,N-dimethylaminopropylacrylamide@7.87-rp	N,N-dimethylaminopropylacrylamide	156.126	7.87	C8H16N2O	69861	#N/A	rp
FAUX	2,2,6,6-Tetramethyl-4-piperidinamine@6.497-rp	2,2,6,6-Tetramethyl-4-piperidinamine	156.163	6.497	C9H20N2	34423	#N/A	rp
FAUX	156.50729@1.101-rp	#N/A	156.507	1.101	#N/A	#N/A	#N/A	rp
FAUX	156.7739@7.092-rp	#N/A	156.774	7.092	#N/A	#N/A	#N/A	rp
FAUX	157.00534@0.955-rp	#N/A	157.005	0.955	#N/A	#N/A	#N/A	rp
FAUX	157.02266@0.952-rp	#N/A	157.023	0.952	C2H7NO7	#N/A	#N/A	rp
FAUX	2-aminomuconicacid@1.32-rp	2-aminomuconicacid	157.038	1.32	C6H7NO4	#N/A	Metabolic pathways;Tryptophan metabolism	rp
FAUX	2-aminomuconicacid@1.546-rp	2-aminomuconicacid	157.038	1.546	C6H7NO4	#N/A	Metabolic pathways;Tryptophan metabolism	rp
FAUX	1-nitrosonaphthalene@1.515-rp	1-nitrosonaphthalene	157.053	1.515	C10H7NO	#N/A	Other	rp
FAUX	1-nitrosonaphthalene@1.668-rp	1-nitrosonaphthalene	157.053	1.668	C10H7NO	#N/A	Other	rp
FAUX	DD5650000@2.095-rp	DD5650000	157.063	2.095	C9H7N3	19265	#N/A	rp
FAUX	DD5650000@1.549-rp	DD5650000	157.064	1.549	C9H7N3	19265	#N/A	rp
FAUX	L-(-14-C)Histidine@1.11-rp	L-(-14-C)Histidine	157.073	1.11	C5[14]CH9N3O2	#N/A	#N/A	rp
FAUX	3-methylcrotonylglycine@7.323-rp	3-methylcrotonylglycine	157.074	7.323	C7H11NO3	#N/A	#N/A	rp
FAUX	3-methylcrotonylglycine@0.949-rp	3-methylcrotonylglycine	157.074	0.949	C7H11NO3	#N/A	#N/A	rp
FAUX	3-methylcrotonylglycine@3.302-rp	3-methylcrotonylglycine	157.074	3.302	C7H11NO3	#N/A	#N/A	rp
FAUX	3-methylcrotonylglycine@2.721-rp	3-methylcrotonylglycine	157.074	2.721	C7H11NO3	#N/A	#N/A	rp
FAUX	3-methylcrotonylglycine@1.251-rp	3-methylcrotonylglycine	157.074	1.251	C7H11NO3	#N/A	#N/A	rp
FAUX	AMIDINOPROLINE@6.701-rp	AMIDINOPROLINE	157.085	6.701	C6H11N3O2	9818706	#N/A	rp
FAUX	AMIDINOPROLINE@1.083-rp	AMIDINOPROLINE	157.085	1.083	C6H11N3O2	9818706	#N/A	rp
FAUX	157.096@1.147-rp	#N/A	157.096	1.147	#N/A	#N/A	#N/A	rp
FAUX	(4,4,5,5-Tetramethyl-3-oxido-4,5-dihydro-1H-imidazol-1-yl)oxidanyl@1.102-rp	(4,4,5,5-Tetramethyl-3-oxido-4,5-dihydro-1H-imidazol-1-yl)oxidanyl	157.098	1.102	C7H13N2O2	4938907	#N/A	rp
FAUX	(4,4,5,5-Tetramethyl-3-oxido-4,5-dihydro-1H-imidazol-1-yl)oxidanyl@1.367-rp	(4,4,5,5-Tetramethyl-3-oxido-4,5-dihydro-1H-imidazol-1-yl)oxidanyl	157.098	1.367	C7H13N2O2	4938907	#N/A	rp
FAUX	(4,4,5,5-Tetramethyl-3-oxido-4,5-dihydro-1H-imidazol-1-yl)oxidanyl@6.709-rp	(4,4,5,5-Tetramethyl-3-oxido-4,5-dihydro-1H-imidazol-1-yl)oxidanyl	157.098	6.709	C7H13N2O2	4938907	#N/A	rp
FAUX	(4,4,5,5-Tetramethyl-3-oxido-4,5-dihydro-1H-imidazol-1-yl)oxidanyl@7.18-rp	(4,4,5,5-Tetramethyl-3-oxido-4,5-dihydro-1H-imidazol-1-yl)oxidanyl	157.098	7.18	C7H13N2O2	4938907	#N/A	rp
FAUX	157.10331@6.545-rp	#N/A	157.103	6.545	#N/A	#N/A	#N/A	rp
FAUX	tranexamicacid@1.777-rp	tranexamicacid	157.11	1.777	C8H15NO2	10482000	#N/A	rp
FAUX	tranexamicacid@1.523-rp	tranexamicacid	157.111	1.523	C8H15NO2	10482000	#N/A	rp
FAUX	2,2,6,6-Tetramethyl-4-piperidinol@13.499-rp	2,2,6,6-Tetramethyl-4-piperidinol	157.146	13.499	C9H19NO	68000	#N/A	rp
FAUX	157.43363@7.045-rp	#N/A	157.434	7.045	#N/A	#N/A	#N/A	rp
FAUX	157.5792@7.107-rp	#N/A	157.579	7.107	#N/A	#N/A	#N/A	rp
FAUX	157.76557@7.029-rp	#N/A	157.766	7.029	#N/A	#N/A	#N/A	rp
FAUX	157.99821@1.027-rp	#N/A	157.998	1.027	C2H7O6P	#N/A	#N/A	rp
FAUX	158.00658@0.917-rp	#N/A	158.007	0.917	C2H6O8	#N/A	#N/A	rp
FAUX	Dihydrooroticacid@1.296-rp	Dihydrooroticacid	158.033	1.296	C5H6N2O4	#N/A	Metabolic pathways;Other	rp
FAUX	158.04295@0.947-rp	#N/A	158.043	0.947	#N/A	#N/A	Metabolic pathways;Microbial metabolism in diverse environments;Other	rp
FAUX	Allantoin@1.194-rp	Allantoin	158.044	1.194	C4H6N4O3	199	Metabolic pathways;Microbial metabolism in diverse environments;Other	rp
FAUX	158.0529@4.756-rp	#N/A	158.053	4.756	#N/A	#N/A	#N/A	rp
FAUX	bipyrimidine@9.357-rp	bipyrimidine	158.059	9.357	C8H6N4	110040	Biosynthesis of secondary metabolites;2-Oxocarboxylic acid metabolism;Other	rp
FAUX	5-hydroxyectoine@1.89-rp	5-hydroxyectoine	158.069	1.89	C6H10N2O3	#N/A	Metabolic pathways;Microbial metabolism in diverse environments;Other	rp
FAUX	5-hydroxyectoine@1.118-rp	5-hydroxyectoine	158.069	1.118	C6H10N2O3	#N/A	Metabolic pathways;Microbial metabolism in diverse environments;Other	rp
FAUX	5-hydroxyectoine@2.135-rp	5-hydroxyectoine	158.069	2.135	C6H10N2O3	#N/A	Metabolic pathways;Microbial metabolism in diverse environments;Other	rp
FAUX	1-benzylimidazole@1.672-rp	1-benzylimidazole	158.084	1.672	C10H10N2	70309	#N/A	rp
FAUX	1-benzylimidazole@3.149-rp	1-benzylimidazole	158.085	3.149	C10H10N2	70309	#N/A	rp
FAUX	TL1378000@7.521-rp	TL1378000	158.106	7.521	C7H14N2O2	8124	#N/A	rp
FAUX	TL1378000@7.148-rp	TL1378000	158.106	7.148	C7H14N2O2	8124	#N/A	rp
FAUX	TL1378000@1.198-rp	TL1378000	158.106	1.198	C7H14N2O2	8124	#N/A	rp
FAUX	GW6600000@14.403-rp	GW6600000	158.109	14.403	C12H14	12501	#N/A	rp
FAUX	GW6600000@13.428-rp	GW6600000	158.109	13.428	C12H14	12501	#N/A	rp
FAUX	GW6600000@13.961-rp	GW6600000	158.109	13.961	C12H14	12501	#N/A	rp
FAUX	GW6600000@12.334-rp	GW6600000	158.109	12.334	C12H14	12501	#N/A	rp
FAUX	GW6600000@9.174-rp	GW6600000	158.109	9.174	C12H14	12501	#N/A	rp
FAUX	Caprylicmethylester@15.527-rp	Caprylicmethylester	158.13	15.527	C9H18O2	#N/A	#N/A	rp
FAUX	158.49401@1.47-rp	#N/A	158.494	1.47	#N/A	#N/A	#N/A	rp
FAUX	1-(1,3-Thiazol-2-yl)thiourea@0.926-rp	1-(1,3-Thiazol-2-yl)thiourea	158.993	0.926	C4H5N3S2	2051459	#N/A	rp
FAUX	P3SA@2.03-rp	P3SA	158.999	2.03	C5H5NO3S	62675	#N/A	rp
FAUX	Citiolone@10.941-rp	Citiolone	159.035	10.941	C6H9NO2S	13864	#N/A	rp
FAUX	Citiolone@13.568-rp	Citiolone	159.035	13.568	C6H9NO2S	13864	#N/A	rp
FAUX	Citiolone@6.537-rp	Citiolone	159.035	6.537	C6H9NO2S	13864	#N/A	rp
FAUX	Citiolone@7.894-rp	Citiolone	159.035	7.894	C6H9NO2S	13864	#N/A	rp
FAUX	Citiolone@9.146-rp	Citiolone	159.035	9.146	C6H9NO2S	13864	#N/A	rp
FAUX	Citiolone@12.679-rp	Citiolone	159.035	12.679	C6H9NO2S	13864	#N/A	rp
FAUX	Citiolone@11.746-rp	Citiolone	159.035	11.746	C6H9NO2S	13864	#N/A	rp
FAUX	Citiolone@4.756-rp	Citiolone	159.035	4.756	C6H9NO2S	13864	#N/A	rp
FAUX	Citiolone@9.983-rp	Citiolone	159.035	9.983	C6H9NO2S	13864	#N/A	rp
FAUX	Citiolone@8.679-rp	Citiolone	159.035	8.679	C6H9NO2S	13864	#N/A	rp
FAUX	Citiolone@7.044-rp	Citiolone	159.035	7.044	C6H9NO2S	13864	#N/A	rp
FAUX	4-methyleneglutamicacid@1.165-rp	4-methyleneglutamicacid	159.053	1.165	C6H9NO4	#N/A	Other	rp
FAUX	4-methyleneglutamicacid@1.468-rp	4-methyleneglutamicacid	159.053	1.468	C6H9NO4	#N/A	Other	rp
FAUX	4-methyleneglutamicacid@1.396-rp	4-methyleneglutamicacid	159.053	1.396	C6H9NO4	#N/A	Other	rp
FAUX	9H-Imidazo[2,1-i]purine@1.206-rp	9H-Imidazo[2,1-i]purine	159.054	1.206	C7H5N5	11365528	Other	rp
FAUX	6-Carboxyhexanoate@1.2-rp	6-Carboxyhexanoate	159.067	1.2	C7H11O4	29368519	#N/A	rp
FAUX	6-methoxyquinoline@3.146-rp	6-methoxyquinoline	159.068	3.146	C10H9NO	#N/A	Metabolic pathways;Biosynthesis of secondary metabolites;Tryptophan metabolism;Biosynthesis of various secondary metabolites - part 2;Other	rp
FAUX	6-methoxyquinoline@1.974-rp	6-methoxyquinoline	159.068	1.974	C10H9NO	#N/A	Metabolic pathways;Biosynthesis of secondary metabolites;Tryptophan metabolism;Biosynthesis of various secondary metabolites - part 2;Other	rp
FAUX	6-methoxyquinoline@8.168-rp	6-methoxyquinoline	159.069	8.168	C10H9NO	#N/A	Metabolic pathways;Biosynthesis of secondary metabolites;Tryptophan metabolism;Biosynthesis of various secondary metabolites - part 2;Other	rp
FAUX	6-methoxyquinoline@7.428-rp	6-methoxyquinoline	159.069	7.428	C10H9NO	#N/A	Metabolic pathways;Biosynthesis of secondary metabolites;Tryptophan metabolism;Biosynthesis of various secondary metabolites - part 2;Other	rp
FAUX	[6-(Methylsulfanyl)hexylidyne]azaneoxide@1.524-rp	[6-(Methylsulfanyl)hexylidyne]azaneoxide	159.072	1.524	C7H13NOS	24624604	#N/A	rp
FAUX	159.07705@1.094-rp	#N/A	159.077	1.094	#N/A	#N/A	#N/A	rp
FAUX	3-dehydrocarnitine@1.425-rp	3-dehydrocarnitine	159.09	1.425	C7H13NO3	5360148	Metabolic pathways;Other	rp
FAUX	3-dehydrocarnitine@1.196-rp	3-dehydrocarnitine	159.09	1.196	C7H13NO3	5360148	Metabolic pathways;Other	rp
FAUX	3-dehydrocarnitine@4.03-rp	3-dehydrocarnitine	159.09	4.03	C7H13NO3	5360148	Metabolic pathways;Other	rp
FAUX	3-dehydrocarnitine@6.014-rp	3-dehydrocarnitine	159.09	6.014	C7H13NO3	5360148	Metabolic pathways;Other	rp
FAUX	3-dehydrocarnitine@3.291-rp	3-dehydrocarnitine	159.09	3.291	C7H13NO3	5360148	Metabolic pathways;Other	rp
FAUX	3-dehydrocarnitine@5.856-rp	3-dehydrocarnitine	159.09	5.856	C7H13NO3	5360148	Metabolic pathways;Other	rp
FAUX	3-dehydrocarnitine@6.288-rp	3-dehydrocarnitine	159.09	6.288	C7H13NO3	5360148	Metabolic pathways;Other	rp
FAUX	2-morpholin-4-ylacetohydrazide@1.53-rp	2-morpholin-4-ylacetohydrazide	159.101	1.53	C6H13N3O2	312200	#N/A	rp
FAUX	Pregabalin@1.861-rp	Pregabalin	159.126	1.861	C8H17NO2	4589156	#N/A	rp
FAUX	Pregabalin@1.321-rp	Pregabalin	159.126	1.321	C8H17NO2	4589156	#N/A	rp
FAUX	Pregabalin@1.569-rp	Pregabalin	159.126	1.569	C8H17NO2	4589156	#N/A	rp
FAUX	159.98306@1.492-rp	#N/A	159.983	1.492	C7HN2OP	#N/A	#N/A	rp
FAUX	159.9832@1.363-rp	#N/A	159.983	1.363	C7HN2OP	#N/A	#N/A	rp
FAUX	8-Quinolinethiolate@6.104-rp	8-Quinolinethiolate	160.022	6.104	C9H6NS	9240531	#N/A	rp
FAUX	8-Quinolinethiolate@0.943-rp	8-Quinolinethiolate	160.022	0.943	C9H6NS	9240531	#N/A	rp
FAUX	160.03353@1.179-rp	#N/A	160.034	1.179	#N/A	#N/A	#N/A	rp
FAUX	2-formylglutaricacid@1.185-rp	2-formylglutaricacid	160.037	1.185	C6H8O5	4445079	Metabolic pathways;Biosynthesis of secondary metabolites;Microbial metabolism in diverse environments;Degradation of aromatic compounds;2-Oxocarboxylic acid metabolism;Biosynthesis of amino acids;Tryptophan metabolism;Other	rp
FAUX	2-formylglutaricacid@1.537-rp	2-formylglutaricacid	160.037	1.537	C6H8O5	4445079	Metabolic pathways;Biosynthesis of secondary metabolites;Microbial metabolism in diverse environments;Degradation of aromatic compounds;2-Oxocarboxylic acid metabolism;Biosynthesis of amino acids;Tryptophan metabolism;Other	rp
FAUX	N-formiminoasparticacid@1.249-rp	N-formiminoasparticacid	160.049	1.249	C5H8N2O4	#N/A	Metabolic pathways;Other	rp
FAUX	2,2-dimethylglutaricacid@1.774-rp	2,2-dimethylglutaricacid	160.074	1.774	C7H12O4	#N/A	Metabolic pathways;Other	rp
FAUX	2,2-dimethylglutaricacid@2.093-rp	2,2-dimethylglutaricacid	160.074	2.093	C7H12O4	#N/A	Metabolic pathways;Other	rp
FAUX	Alanylalanine@1.093-rp	Alanylalanine	160.085	1.093	C6H12N2O3	#N/A	Metabolic pathways;Microbial metabolism in diverse environments;Other	rp
FAUX	Alanylalanine@2.631-rp	Alanylalanine	160.085	2.631	C6H12N2O3	#N/A	Metabolic pathways;Microbial metabolism in diverse environments;Other	rp
FAUX	Anatabine@3.151-rp	Anatabine	160.1	3.151	C10H12N2	229558	Metabolic pathways;Biosynthesis of secondary metabolites;Microbial metabolism in diverse environments;Biosynthesis of plant secondary metabolites;Biosynthesis of alkaloids derived from shikimate pathway;Tryptophan metabolism;Other	rp
FAUX	3-hydroxyvalproicacid@10.019-rp	3-hydroxyvalproicacid	160.11	10.019	C8H16O3	#N/A	Other	rp
FAUX	CZ1330000@13.559-rp	CZ1330000	160.125	13.559	C12H16	12674	#N/A	rp
FAUX	CZ1330000@13.429-rp	CZ1330000	160.125	13.429	C12H16	12674	#N/A	rp
FAUX	CZ1330000@13.955-rp	CZ1330000	160.125	13.955	C12H16	12674	#N/A	rp
FAUX	CZ1330000@13.104-rp	CZ1330000	160.125	13.104	C12H16	12674	#N/A	rp
FAUX	CZ1330000@19.322-rp	CZ1330000	160.125	19.322	C12H16	12674	#N/A	rp
FAUX	CZ1330000@15.09-rp	CZ1330000	160.125	15.09	C12H16	12674	#N/A	rp
FAUX	CZ1330000@15.526-rp	CZ1330000	160.125	15.526	C12H16	12674	#N/A	rp
FAUX	CZ1330000@16.296-rp	CZ1330000	160.125	16.296	C12H16	12674	#N/A	rp
FAUX	CZ1330000@17.818-rp	CZ1330000	160.125	17.818	C12H16	12674	#N/A	rp
FAUX	160.12648@15.524-rp	#N/A	160.126	15.524	#N/A	#N/A	#N/A	rp
FAUX	160.55724@4.757-rp	#N/A	160.557	4.757	#N/A	#N/A	#N/A	rp
FAUX	160.58859@1.527-rp	#N/A	160.589	1.527	#N/A	#N/A	#N/A	rp
FAUX	160.5902@7.138-rp	#N/A	160.59	7.138	#N/A	#N/A	#N/A	rp
FAUX	160.60254@7.133-rp	#N/A	160.603	7.133	#N/A	#N/A	#N/A	rp
FAUX	1-(2-Thioxo-1,3-thiazolidin-3-yl)ethanone@1.009-rp	1-(2-Thioxo-1,3-thiazolidin-3-yl)ethanone	160.998	1.009	C5H7NOS2	9964195	#N/A	rp
FAUX	161.01477@1.127-rp	#N/A	161.015	1.127	C7H4N3P	#N/A	#N/A	rp
FAUX	Methyl2,3,3-tricyanoacrylate@0.943-rp	Methyl2,3,3-tricyanoacrylate	161.023	0.943	C7H3N3O2	10308751	#N/A	rp
FAUX	(S)-4-Isopropylthiazolidine-2-thione@8.028-rp	(S)-4-Isopropylthiazolidine-2-thione	161.033	8.028	C6H11NS2	9496294	#N/A	rp
FAUX	4-Oxo-2,4-dihydro-1H-pyrazolo[3,4-d]pyrimidine-3-carbonitrile@6.898-rp	4-Oxo-2,4-dihydro-1H-pyrazolo[3,4-d]pyrimidine-3-carbonitrile	161.034	6.898	C6H3N5O	301617	#N/A	rp
FAUX	2,4-quinolinediol@15.304-rp	2,4-quinolinediol	161.047	15.304	C9H7NO2	#N/A	Metabolic pathways;Biosynthesis of alkaloids derived from shikimate pathway;Tryptophan metabolism	rp
FAUX	2,4-quinolinediol@16.215-rp	2,4-quinolinediol	161.047	16.215	C9H7NO2	#N/A	Metabolic pathways;Biosynthesis of alkaloids derived from shikimate pathway;Tryptophan metabolism	rp
FAUX	2,4-quinolinediol@8.135-rp	2,4-quinolinediol	161.047	8.135	C9H7NO2	#N/A	Metabolic pathways;Biosynthesis of alkaloids derived from shikimate pathway;Tryptophan metabolism	rp
FAUX	2,4-quinolinediol@6.599-rp	2,4-quinolinediol	161.048	6.599	C9H7NO2	#N/A	Metabolic pathways;Biosynthesis of alkaloids derived from shikimate pathway;Tryptophan metabolism	rp
FAUX	2,4-quinolinediol@8.554-rp	2,4-quinolinediol	161.048	8.554	C9H7NO2	#N/A	Metabolic pathways;Biosynthesis of alkaloids derived from shikimate pathway;Tryptophan metabolism	rp
FAUX	2,4-quinolinediol@2.363-rp	2,4-quinolinediol	161.048	2.363	C9H7NO2	#N/A	Metabolic pathways;Biosynthesis of alkaloids derived from shikimate pathway;Tryptophan metabolism	rp
FAUX	2,4-quinolinediol@5.701-rp	2,4-quinolinediol	161.048	5.701	C9H7NO2	#N/A	Metabolic pathways;Biosynthesis of alkaloids derived from shikimate pathway;Tryptophan metabolism	rp
FAUX	2,4-quinolinediol@6.355-rp	2,4-quinolinediol	161.048	6.355	C9H7NO2	#N/A	Metabolic pathways;Biosynthesis of alkaloids derived from shikimate pathway;Tryptophan metabolism	rp
FAUX	2,4-quinolinediol@2.926-rp	2,4-quinolinediol	161.048	2.926	C9H7NO2	#N/A	Metabolic pathways;Biosynthesis of alkaloids derived from shikimate pathway;Tryptophan metabolism	rp
FAUX	2,4-quinolinediol@7.788-rp	2,4-quinolinediol	161.048	7.788	C9H7NO2	#N/A	Metabolic pathways;Biosynthesis of alkaloids derived from shikimate pathway;Tryptophan metabolism	rp
FAUX	Diethylaminosulfurtrifluoride@2.126-rp	Diethylaminosulfurtrifluoride	161.049	2.126	C4H10F3NS	110068	#N/A	rp
FAUX	S-Allyl-L-cysteine@1.765-rp	S-Allyl-L-cysteine	161.051	1.765	C6H11NO2S	7969672	#N/A	rp
FAUX	2-aminoadipicacid@7.316-rp	2-aminoadipicacid	161.069	7.316	C6H11NO4	#N/A	Metabolic pathways;Biosynthesis of secondary metabolites;Microbial metabolism in diverse environments;2-Oxocarboxylic acid metabolism;Biosynthesis of amino acids;Other	rp
FAUX	2-aminoadipicacid@1.137-rp	2-aminoadipicacid	161.069	1.137	C6H11NO4	#N/A	Metabolic pathways;Biosynthesis of secondary metabolites;Microbial metabolism in diverse environments;2-Oxocarboxylic acid metabolism;Biosynthesis of amino acids;Other	rp
FAUX	2-aminoadipicacid@1.25-rp	2-aminoadipicacid	161.069	1.25	C6H11NO4	#N/A	Metabolic pathways;Biosynthesis of secondary metabolites;Microbial metabolism in diverse environments;2-Oxocarboxylic acid metabolism;Biosynthesis of amino acids;Other	rp
FAUX	2-aminoadipicacid@1.567-rp	2-aminoadipicacid	161.069	1.567	C6H11NO4	#N/A	Metabolic pathways;Biosynthesis of secondary metabolites;Microbial metabolism in diverse environments;2-Oxocarboxylic acid metabolism;Biosynthesis of amino acids;Other	rp
FAUX	2-aminoadipicacid@1.82-rp	2-aminoadipicacid	161.069	1.82	C6H11NO4	#N/A	Metabolic pathways;Biosynthesis of secondary metabolites;Microbial metabolism in diverse environments;2-Oxocarboxylic acid metabolism;Biosynthesis of amino acids;Other	rp
FAUX	2-aminoadipicacid@0.911-rp	2-aminoadipicacid	161.069	0.911	C6H11NO4	#N/A	Metabolic pathways;Biosynthesis of secondary metabolites;Microbial metabolism in diverse environments;2-Oxocarboxylic acid metabolism;Biosynthesis of amino acids;Other	rp
FAUX	Indole-3-ethanol@9.298-rp	Indole-3-ethanol	161.084	9.298	C10H11NO	#N/A	Tryptophan metabolism	rp
FAUX	6-methylthiohexanaldoxime@6.893-rp	6-methylthiohexanaldoxime	161.088	6.893	C7H15NOS	26372775	2-Oxocarboxylic acid metabolism;Other	rp
FAUX	6-methylthiohexanaldoxime@7.823-rp	6-methylthiohexanaldoxime	161.088	7.823	C7H15NOS	26372775	2-Oxocarboxylic acid metabolism;Other	rp
FAUX	Carnitine@1.116-rp	Carnitine	161.105	1.116	C7H15NO3	#N/A	Bile secretion;Other	rp
FAUX	161.52544@6.398-rp	#N/A	161.525	6.398	#N/A	#N/A	#N/A	rp
FAUX	161.54848@4.198-rp	#N/A	161.548	4.198	#N/A	#N/A	#N/A	rp
FAUX	161.58512@6.424-rp	#N/A	161.585	6.424	#N/A	#N/A	#N/A	rp
FAUX	161.61049@7.034-rp	#N/A	161.61	7.034	#N/A	#N/A	#N/A	rp
FAUX	161.98199@0.948-rp	#N/A	161.982	0.948	C5H8P2S	#N/A	#N/A	rp
FAUX	4-hydroxy-2-oxoglutaricacid@1.185-rp	4-hydroxy-2-oxoglutaricacid	162.016	1.185	C5H6O6	#N/A	Metabolic pathways;Arginine and proline metabolism;Other	rp
FAUX	162.0197@0.947-rp	#N/A	162.02	0.947	C4H7N2O3P	#N/A	#N/A	rp
FAUX	162.01979@6.099-rp	#N/A	162.02	6.099	C4H7N2O3P	#N/A	#N/A	rp
FAUX	2,3-dimethylmalicacid@1.182-rp	2,3-dimethylmalicacid	162.053	1.182	C6H10O5	#N/A	Metabolic pathways;Biosynthesis of secondary metabolites;Microbial metabolism in diverse environments;Other	rp
FAUX	2,3-dimethylmalicacid@1.772-rp	2,3-dimethylmalicacid	162.053	1.772	C6H10O5	#N/A	Metabolic pathways;Biosynthesis of secondary metabolites;Microbial metabolism in diverse environments;Other	rp
FAUX	2,3-dimethylmalicacid@2.15-rp	2,3-dimethylmalicacid	162.053	2.15	C6H10O5	#N/A	Metabolic pathways;Biosynthesis of secondary metabolites;Microbial metabolism in diverse environments;Other	rp
FAUX	2,3-dimethylmalicacid@1.511-rp	2,3-dimethylmalicacid	162.053	1.511	C6H10O5	#N/A	Metabolic pathways;Biosynthesis of secondary metabolites;Microbial metabolism in diverse environments;Other	rp
FAUX	162.06116@6.713-rp	#N/A	162.061	6.713	#N/A	#N/A	#N/A	rp
FAUX	162.06126@1.632-rp	#N/A	162.061	1.632	#N/A	#N/A	#N/A	rp
FAUX	Gly-Ser@1.081-rp	Gly-Ser	162.063	1.081	C5H10N2O4	65873	#N/A	rp
FAUX	162.06416@1.099-rp	#N/A	162.064	1.099	C7H15PS	#N/A	#N/A	rp
FAUX	Dihydronaphthalenediol@12.213-rp	Dihydronaphthalenediol	162.068	12.213	C10H10O2	#N/A	Metabolic pathways;Microbial metabolism in diverse environments;Degradation of aromatic compounds;Other	rp
FAUX	Monobutyrin@3.935-rp	Monobutyrin	162.089	3.935	C7H14O4	10715	#N/A	rp
FAUX	Monobutyrin@2.827-rp	Monobutyrin	162.089	2.827	C7H14O4	10715	#N/A	rp
FAUX	Monobutyrin@4.173-rp	Monobutyrin	162.089	4.173	C7H14O4	10715	#N/A	rp
FAUX	162.09719@7.019-rp	#N/A	162.097	7.019	#N/A	#N/A	#N/A	rp
FAUX	Valerophenone@13.423-rp	Valerophenone	162.104	13.423	C11H14O	59482	Metabolic pathways;Biosynthesis of secondary metabolites;Ubiquinone and other terpenoid-quinone biosynthesis	rp
FAUX	Valerophenone@8.785-rp	Valerophenone	162.104	8.785	C11H14O	59482	Metabolic pathways;Biosynthesis of secondary metabolites;Ubiquinone and other terpenoid-quinone biosynthesis	rp
FAUX	Valerophenone@10.144-rp	Valerophenone	162.104	10.144	C11H14O	59482	Metabolic pathways;Biosynthesis of secondary metabolites;Ubiquinone and other terpenoid-quinone biosynthesis	rp
FAUX	Valerophenone@8.254-rp	Valerophenone	162.104	8.254	C11H14O	59482	Metabolic pathways;Biosynthesis of secondary metabolites;Ubiquinone and other terpenoid-quinone biosynthesis	rp
FAUX	162.10932@7.161-rp	#N/A	162.109	7.161	#N/A	#N/A	#N/A	rp
FAUX	Anabasine@7.631-rp	Anabasine	162.116	7.631	C10H14N2	#N/A	Metabolic pathways;Biosynthesis of secondary metabolites;Microbial metabolism in diverse environments;Other	rp
FAUX	1-t-butyl-4-ethylbenzene@15.531-rp	1-t-butyl-4-ethylbenzene	162.141	15.531	C12H18	73840	#N/A	rp
FAUX	1-t-butyl-4-ethylbenzene@17.816-rp	1-t-butyl-4-ethylbenzene	162.141	17.816	C12H18	73840	#N/A	rp
FAUX	1-t-butyl-4-ethylbenzene@8.921-rp	1-t-butyl-4-ethylbenzene	162.141	8.921	C12H18	73840	#N/A	rp
FAUX	162.53813@1.512-rp	#N/A	162.538	1.512	#N/A	#N/A	#N/A	rp
FAUX	162.54738@4.463-rp	#N/A	162.547	4.463	#N/A	#N/A	#N/A	rp
FAUX	162.58126@1.118-rp	#N/A	162.581	1.118	#N/A	#N/A	#N/A	rp
FAUX	162.58184@6.203-rp	#N/A	162.582	6.203	#N/A	#N/A	#N/A	rp
FAUX	162.58611@1.278-rp	#N/A	162.586	1.278	#N/A	#N/A	#N/A	rp
FAUX	162.58751@6.492-rp	#N/A	162.588	6.492	#N/A	#N/A	#N/A	rp
FAUX	162.58754@1.123-rp	#N/A	162.588	1.123	#N/A	#N/A	#N/A	rp
FAUX	162.58754@6.817-rp	#N/A	162.588	6.817	#N/A	#N/A	#N/A	rp
FAUX	162.58759@1.274-rp	#N/A	162.588	1.274	#N/A	#N/A	#N/A	rp
FAUX	162.76528@6.811-rp	#N/A	162.765	6.811	#N/A	#N/A	#N/A	rp
FAUX	162.9612@6.115-rp	#N/A	162.961	6.115	C2H4N3P3	#N/A	#N/A	rp
FAUX	162.97064@1.083-rp	#N/A	162.971	1.083	C2H3N3O2P2	#N/A	#N/A	rp
FAUX	162.98855@2.96-rp	#N/A	162.989	2.96	#N/A	#N/A	#N/A	rp
FAUX	163.00149@1.066-rp	#N/A	163.001	1.066	CH2ClN7O	#N/A	#N/A	rp
FAUX	163.00677@2.401-rp	#N/A	163.007	2.401	C3H7N3OP2	#N/A	#N/A	rp
FAUX	Benzothiazole-2-carboxaldehyde@1.467-rp	Benzothiazole-2-carboxaldehyde	163.009	1.467	C8H5NOS	211171	#N/A	rp
FAUX	163.02222@1.069-rp	#N/A	163.022	1.069	C5H10NOPS	#N/A	#N/A	rp
FAUX	N-Hydroxyphthalimide@2.362-rp	N-Hydroxyphthalimide	163.027	2.362	C8H5NO3	10215	#N/A	rp
FAUX	N-acetylcysteine@14.233-rp	N-acetylcysteine	163.03	14.233	C5H9NO3S	#N/A	#N/A	rp
FAUX	N-acetylcysteine@2.179-rp	N-acetylcysteine	163.031	2.179	C5H9NO3S	#N/A	#N/A	rp
FAUX	Erythro-4-hydroxyglutamate@1.169-rp	Erythro-4-hydroxyglutamate	163.048	1.169	C5H9NO5	#N/A	Metabolic pathways;Arginine and proline metabolism	rp
FAUX	3-hydroxy-3-methyloxindole@4.543-rp	3-hydroxy-3-methyloxindole	163.063	4.543	C9H9NO2	133151	Metabolic pathways;Microbial metabolism in diverse environments;Tryptophan metabolism;Other	rp
FAUX	3-hydroxy-3-methyloxindole@4.756-rp	3-hydroxy-3-methyloxindole	163.063	4.756	C9H9NO2	133151	Metabolic pathways;Microbial metabolism in diverse environments;Tryptophan metabolism;Other	rp
FAUX	3-hydroxy-3-methyloxindole@2.934-rp	3-hydroxy-3-methyloxindole	163.063	2.934	C9H9NO2	133151	Metabolic pathways;Microbial metabolism in diverse environments;Tryptophan metabolism;Other	rp
FAUX	3-hydroxy-3-methyloxindole@5.46-rp	3-hydroxy-3-methyloxindole	163.063	5.46	C9H9NO2	133151	Metabolic pathways;Microbial metabolism in diverse environments;Tryptophan metabolism;Other	rp
FAUX	3-hydroxy-3-methyloxindole@6.702-rp	3-hydroxy-3-methyloxindole	163.063	6.702	C9H9NO2	133151	Metabolic pathways;Microbial metabolism in diverse environments;Tryptophan metabolism;Other	rp
FAUX	3-hydroxy-3-methyloxindole@3.184-rp	3-hydroxy-3-methyloxindole	163.063	3.184	C9H9NO2	133151	Metabolic pathways;Microbial metabolism in diverse environments;Tryptophan metabolism;Other	rp
FAUX	3-hydroxy-3-methyloxindole@5.709-rp	3-hydroxy-3-methyloxindole	163.063	5.709	C9H9NO2	133151	Metabolic pathways;Microbial metabolism in diverse environments;Tryptophan metabolism;Other	rp
FAUX	3-hydroxy-3-methyloxindole@6.421-rp	3-hydroxy-3-methyloxindole	163.063	6.421	C9H9NO2	133151	Metabolic pathways;Microbial metabolism in diverse environments;Tryptophan metabolism;Other	rp
FAUX	3-hydroxy-3-methyloxindole@6.602-rp	3-hydroxy-3-methyloxindole	163.063	6.602	C9H9NO2	133151	Metabolic pathways;Microbial metabolism in diverse environments;Tryptophan metabolism;Other	rp
FAUX	3-hydroxy-3-methyloxindole@1.548-rp	3-hydroxy-3-methyloxindole	163.063	1.548	C9H9NO2	133151	Metabolic pathways;Microbial metabolism in diverse environments;Tryptophan metabolism;Other	rp
FAUX	3-hydroxy-3-methyloxindole@2.005-rp	3-hydroxy-3-methyloxindole	163.064	2.005	C9H9NO2	133151	Metabolic pathways;Microbial metabolism in diverse environments;Tryptophan metabolism;Other	rp
FAUX	2-deoxyinosamine@1.418-rp	2-deoxyinosamine	163.084	1.418	C6H13NO4	#N/A	Biosynthesis of secondary metabolites;Other	rp
FAUX	2-deoxyinosamine@1.123-rp	2-deoxyinosamine	163.085	1.123	C6H13NO4	#N/A	Biosynthesis of secondary metabolites;Other	rp
FAUX	TRIS(HYDROXYETHYL)AMINOMETHANE@1.082-rp	TRIS(HYDROXYETHYL)AMINOMETHANE	163.121	1.082	C7H17NO3	394944	#N/A	rp
FAUX	163.55877@1.102-rp	#N/A	163.559	1.102	#N/A	#N/A	#N/A	rp
FAUX	118077@0.996-rp	118077	163.994	0.996	C8H4O2S	87828	#N/A	rp
FAUX	danosteine@1.483-rp	danosteine	164.015	1.483	C5H8O4S	64341	#N/A	rp
FAUX	D-Xyluronicacid@1.152-rp	D-Xyluronicacid	164.032	1.152	C5H8O6	4444805	#N/A	rp
FAUX	2,4-dihydroxypteridine@2.162-rp	2,4-dihydroxypteridine	164.034	2.162	C6H4N4O2	#N/A	#N/A	rp
FAUX	1-Nitro-2-(2-nitroethoxy)ethane@6.107-rp	1-Nitro-2-(2-nitroethoxy)ethane	164.044	6.107	C4H8N2O5	19974296	#N/A	rp
FAUX	1-Nitro-2-(2-nitroethoxy)ethane@1.633-rp	1-Nitro-2-(2-nitroethoxy)ethane	164.044	1.633	C4H8N2O5	19974296	#N/A	rp
FAUX	164.04577@1.532-rp	#N/A	164.046	1.532	C3H9N4O2P	#N/A	#N/A	rp
FAUX	2-hydroxy-3-phenylpropenoicacid@5.4-rp	2-hydroxy-3-phenylpropenoicacid	164.047	5.4	C9H8O3	#N/A	Metabolic pathways;Biosynthesis of secondary metabolites;Microbial metabolism in diverse environments;Biosynthesis of plant secondary metabolites;Degradation of aromatic compounds;Phenylpropanoid biosynthesis;2-Oxocarboxylic acid metabolism;Biosynthesis of phenylpropanoids;Biosynthesis of amino acids;Phenylalanine metabolism;Ubiquinone and other terpenoid-quinone biosynthesis;Tyrosine metabolism;…	rp
FAUX	2-hydroxy-3-phenylpropenoicacid@1.546-rp	2-hydroxy-3-phenylpropenoicacid	164.047	1.546	C9H8O3	#N/A	Metabolic pathways;Biosynthesis of secondary metabolites;Microbial metabolism in diverse environments;Biosynthesis of plant secondary metabolites;Degradation of aromatic compounds;Phenylpropanoid biosynthesis;2-Oxocarboxylic acid metabolism;Biosynthesis of phenylpropanoids;Biosynthesis of amino acids;Phenylalanine metabolism;Ubiquinone and other terpenoid-quinone biosynthesis;Tyrosine metabolism;…	rp
FAUX	2-hydroxy-3-phenylpropenoicacid@4.051-rp	2-hydroxy-3-phenylpropenoicacid	164.047	4.051	C9H8O3	#N/A	Metabolic pathways;Biosynthesis of secondary metabolites;Microbial metabolism in diverse environments;Biosynthesis of plant secondary metabolites;Degradation of aromatic compounds;Phenylpropanoid biosynthesis;2-Oxocarboxylic acid metabolism;Biosynthesis of phenylpropanoids;Biosynthesis of amino acids;Phenylalanine metabolism;Ubiquinone and other terpenoid-quinone biosynthesis;Tyrosine metabolism;…	rp
FAUX	2-hydroxy-3-phenylpropenoicacid@8.607-rp	2-hydroxy-3-phenylpropenoicacid	164.047	8.607	C9H8O3	#N/A	Metabolic pathways;Biosynthesis of secondary metabolites;Microbial metabolism in diverse environments;Biosynthesis of plant secondary metabolites;Degradation of aromatic compounds;Phenylpropanoid biosynthesis;2-Oxocarboxylic acid metabolism;Biosynthesis of phenylpropanoids;Biosynthesis of amino acids;Phenylalanine metabolism;Ubiquinone and other terpenoid-quinone biosynthesis;Tyrosine metabolism;…	rp
FAUX	2-hydroxy-3-phenylpropenoicacid@4.427-rp	2-hydroxy-3-phenylpropenoicacid	164.048	4.427	C9H8O3	#N/A	Metabolic pathways;Biosynthesis of secondary metabolites;Microbial metabolism in diverse environments;Biosynthesis of plant secondary metabolites;Degradation of aromatic compounds;Phenylpropanoid biosynthesis;2-Oxocarboxylic acid metabolism;Biosynthesis of phenylpropanoids;Biosynthesis of amino acids;Phenylalanine metabolism;Ubiquinone and other terpenoid-quinone biosynthesis;Tyrosine metabolism;…	rp
FAUX	2-hydroxy-3-phenylpropenoicacid@7.55-rp	2-hydroxy-3-phenylpropenoicacid	164.048	7.55	C9H8O3	#N/A	Metabolic pathways;Biosynthesis of secondary metabolites;Microbial metabolism in diverse environments;Biosynthesis of plant secondary metabolites;Degradation of aromatic compounds;Phenylpropanoid biosynthesis;2-Oxocarboxylic acid metabolism;Biosynthesis of phenylpropanoids;Biosynthesis of amino acids;Phenylalanine metabolism;Ubiquinone and other terpenoid-quinone biosynthesis;Tyrosine metabolism;…	rp
FAUX	2-hydroxy-3-phenylpropenoicacid@9.132-rp	2-hydroxy-3-phenylpropenoicacid	164.048	9.132	C9H8O3	#N/A	Metabolic pathways;Biosynthesis of secondary metabolites;Microbial metabolism in diverse environments;Biosynthesis of plant secondary metabolites;Degradation of aromatic compounds;Phenylpropanoid biosynthesis;2-Oxocarboxylic acid metabolism;Biosynthesis of phenylpropanoids;Biosynthesis of amino acids;Phenylalanine metabolism;Ubiquinone and other terpenoid-quinone biosynthesis;Tyrosine metabolism;…	rp
FAUX	164.04857@9.156-rp	#N/A	164.049	9.156	C2H8N6OS	#N/A	#N/A	rp
FAUX	1,5-anhydroglucitol@1.131-rp	1,5-anhydroglucitol	164.069	1.131	C6H12O5	58485	Metabolic pathways;Microbial metabolism in diverse environments;ABC transporters;Other	rp
FAUX	1,5-anhydroglucitol@1.291-rp	1,5-anhydroglucitol	164.069	1.291	C6H12O5	58485	Metabolic pathways;Microbial metabolism in diverse environments;ABC transporters;Other	rp
FAUX	2-Amino-6-methyl-1,7-dihydro-4H-pyrrolo[2,3-d]pyrimidin-4-one@1.505-rp	2-Amino-6-methyl-1,7-dihydro-4H-pyrrolo[2,3-d]pyrimidin-4-one	164.069	1.505	C7H8N4O	288319	Metabolic pathways;Microbial metabolism in diverse environments;ABC transporters;Other	rp
FAUX	2-methoxy-5-prop-1-enylphenol@12.636-rp	2-methoxy-5-prop-1-enylphenol	164.084	12.636	C10H12O2	#N/A	Metabolic pathways;Microbial metabolism in diverse environments;Degradation of aromatic compounds;Phenylpropanoid biosynthesis;Other	rp
FAUX	2-methoxy-5-prop-1-enylphenol@16.404-rp	2-methoxy-5-prop-1-enylphenol	164.084	16.404	C10H12O2	#N/A	Metabolic pathways;Microbial metabolism in diverse environments;Degradation of aromatic compounds;Phenylpropanoid biosynthesis;Other	rp
FAUX	2-methoxy-5-prop-1-enylphenol@19.353-rp	2-methoxy-5-prop-1-enylphenol	164.084	19.353	C10H12O2	#N/A	Metabolic pathways;Microbial metabolism in diverse environments;Degradation of aromatic compounds;Phenylpropanoid biosynthesis;Other	rp
FAUX	2-methoxy-5-prop-1-enylphenol@16.144-rp	2-methoxy-5-prop-1-enylphenol	164.084	16.144	C10H12O2	#N/A	Metabolic pathways;Microbial metabolism in diverse environments;Degradation of aromatic compounds;Phenylpropanoid biosynthesis;Other	rp
FAUX	2-methoxy-5-prop-1-enylphenol@18.89-rp	2-methoxy-5-prop-1-enylphenol	164.084	18.89	C10H12O2	#N/A	Metabolic pathways;Microbial metabolism in diverse environments;Degradation of aromatic compounds;Phenylpropanoid biosynthesis;Other	rp
FAUX	2-methoxy-5-prop-1-enylphenol@15.671-rp	2-methoxy-5-prop-1-enylphenol	164.084	15.671	C10H12O2	#N/A	Metabolic pathways;Microbial metabolism in diverse environments;Degradation of aromatic compounds;Phenylpropanoid biosynthesis;Other	rp
FAUX	164.08384@13.528-rp	#N/A	164.084	13.528	C3H12N6S	#N/A	Metabolic pathways;Microbial metabolism in diverse environments;Degradation of aromatic compounds;Phenylpropanoid biosynthesis;Other	rp
FAUX	164.08751@1.092-rp	#N/A	164.088	1.092	C7H16O2S	#N/A	#N/A	rp
FAUX	6-Amino-1,9-dimethyl-9H-purin-1-ium@5.953-rp	6-Amino-1,9-dimethyl-9H-purin-1-ium	164.093	5.953	C7H10N5	8488855	#N/A	rp
FAUX	(E)-Azobis(isobutyronitrile)@6.652-rp	(E)-Azobis(isobutyronitrile)	164.106	6.652	C8H12N4	6299	#N/A	rp
FAUX	(E)-Azobis(isobutyronitrile)@6.9-rp	(E)-Azobis(isobutyronitrile)	164.106	6.9	C8H12N4	6299	#N/A	rp
FAUX	(E)-Azobis(isobutyronitrile)@1.519-rp	(E)-Azobis(isobutyronitrile)	164.106	1.519	C8H12N4	6299	#N/A	rp
FAUX	(E)-Azobis(isobutyronitrile)@1.349-rp	(E)-Azobis(isobutyronitrile)	164.106	1.349	C8H12N4	6299	#N/A	rp
FAUX	Fenipentol@10.21-rp	Fenipentol	164.12	10.21	C11H16O	3221	#N/A	rp
FAUX	Fenipentol@10.546-rp	Fenipentol	164.12	10.546	C11H16O	3221	#N/A	rp
FAUX	Fenipentol@15.525-rp	Fenipentol	164.12	15.525	C11H16O	3221	#N/A	rp
FAUX	Fenipentol@17.816-rp	Fenipentol	164.12	17.816	C11H16O	3221	#N/A	rp
FAUX	164.53152@1.101-rp	#N/A	164.532	1.101	#N/A	#N/A	#N/A	rp
FAUX	164.9946@1.048-rp	#N/A	164.995	1.048	C2H4N3O4P	#N/A	#N/A	rp
FAUX	164.99498@1.059-rp	#N/A	164.995	1.059	CH3N5O3S	#N/A	#N/A	rp
FAUX	(3S)-1,2-Thiazolidine-3-carboxylicacid1,1-dioxide@1.309-rp	(3S)-1,2-Thiazolidine-3-carboxylicacid1,1-dioxide	165.01	1.309	C4H7NO4S	337796	#N/A	rp
FAUX	(3S)-1,2-Thiazolidine-3-carboxylicacid1,1-dioxide@1.483-rp	(3S)-1,2-Thiazolidine-3-carboxylicacid1,1-dioxide	165.01	1.483	C4H7NO4S	337796	#N/A	rp
FAUX	Methioninesulfoxide@1.249-rp	Methioninesulfoxide	165.046	1.249	C5H11NO3S	#N/A	Other	rp
FAUX	7-methylguanine@4.604-rp	7-methylguanine	165.065	4.604	C6H7N5O	#N/A	#N/A	rp
FAUX	7-methylguanine@2.838-rp	7-methylguanine	165.065	2.838	C6H7N5O	#N/A	#N/A	rp
FAUX	7-methylguanine@4.246-rp	7-methylguanine	165.065	4.246	C6H7N5O	#N/A	#N/A	rp
FAUX	7-methylguanine@5.949-rp	7-methylguanine	165.065	5.949	C6H7N5O	#N/A	#N/A	rp
FAUX	7-methylguanine@5.234-rp	7-methylguanine	165.065	5.234	C6H7N5O	#N/A	#N/A	rp
FAUX	7H-Purine-2,6,8-triamine@1.64-rp	7H-Purine-2,6,8-triamine	165.077	1.64	C5H7N7	79213	#N/A	rp
FAUX	4-hydroxypyridinyl-butanone@4.544-rp	4-hydroxypyridinyl-butanone	165.079	4.544	C9H11NO2	#N/A	Metabolic pathways;Biosynthesis of secondary metabolites;Biosynthesis of plant secondary metabolites;Phenylpropanoid biosynthesis;2-Oxocarboxylic acid metabolism;Biosynthesis of phenylpropanoids;Biosynthesis of amino acids;Biosynthesis of alkaloids derived from shikimate pathway;ABC transporters;Phenylalanine metabolism;Biosynthesis of various secondary metabolites - part 2;Other	rp
FAUX	4-hydroxypyridinyl-butanone@1.99-rp	4-hydroxypyridinyl-butanone	165.079	1.99	C9H11NO2	#N/A	Metabolic pathways;Biosynthesis of secondary metabolites;Biosynthesis of plant secondary metabolites;Phenylpropanoid biosynthesis;2-Oxocarboxylic acid metabolism;Biosynthesis of phenylpropanoids;Biosynthesis of amino acids;Biosynthesis of alkaloids derived from shikimate pathway;ABC transporters;Phenylalanine metabolism;Biosynthesis of various secondary metabolites - part 2;Other	rp
FAUX	4-hydroxypyridinyl-butanone@6.786-rp	4-hydroxypyridinyl-butanone	165.079	6.786	C9H11NO2	#N/A	Metabolic pathways;Biosynthesis of secondary metabolites;Biosynthesis of plant secondary metabolites;Phenylpropanoid biosynthesis;2-Oxocarboxylic acid metabolism;Biosynthesis of phenylpropanoids;Biosynthesis of amino acids;Biosynthesis of alkaloids derived from shikimate pathway;ABC transporters;Phenylalanine metabolism;Biosynthesis of various secondary metabolites - part 2;Other	rp
FAUX	4-hydroxypyridinyl-butanone@3.456-rp	4-hydroxypyridinyl-butanone	165.079	3.456	C9H11NO2	#N/A	Metabolic pathways;Biosynthesis of secondary metabolites;Biosynthesis of plant secondary metabolites;Phenylpropanoid biosynthesis;2-Oxocarboxylic acid metabolism;Biosynthesis of phenylpropanoids;Biosynthesis of amino acids;Biosynthesis of alkaloids derived from shikimate pathway;ABC transporters;Phenylalanine metabolism;Biosynthesis of various secondary metabolites - part 2;Other	rp
FAUX	165.0832@1.123-rp	#N/A	165.083	1.123	#N/A	#N/A	#N/A	rp
FAUX	165.09367@1.102-rp	#N/A	165.094	1.102	#N/A	#N/A	#N/A	rp
FAUX	6-Fluoro-2-methyl-1,2,3,4-tetrahydroquinoline@1.096-rp	6-Fluoro-2-methyl-1,2,3,4-tetrahydroquinoline	165.095	1.096	C10H12FN	514365	#N/A	rp
FAUX	165.10054@1.135-rp	#N/A	165.101	1.135	C6H15NO4	#N/A	#N/A	rp
FAUX	165.10631@5.681-rp	#N/A	165.106	5.681	#N/A	#N/A	#N/A	rp
FAUX	165.10648@6.805-rp	#N/A	165.106	6.805	#N/A	#N/A	#N/A	rp
FAUX	165.11341@1.161-rp	#N/A	165.113	1.161	#N/A	#N/A	#N/A	rp
FAUX	165.11347@6.581-rp	#N/A	165.113	6.581	#N/A	#N/A	#N/A	rp
FAUX	165.61106@6.403-rp	#N/A	165.611	6.403	#N/A	#N/A	#N/A	rp
FAUX	Thiodiaceticacidsulfoxide@1.299-rp	Thiodiaceticacidsulfoxide	165.994	1.299	C4H6O5S	#N/A	Other	rp
FAUX	Thiodiaceticacidsulfoxide@1.481-rp	Thiodiaceticacidsulfoxide	165.994	1.481	C4H6O5S	#N/A	Other	rp
FAUX	165.99401@1.017-rp	#N/A	165.994	1.017	C4H8O3P2	#N/A	Other	rp
FAUX	1,3-benzodioxole-5-carboxylicacid@1.912-rp	1,3-benzodioxole-5-carboxylicacid	166.027	1.912	C8H6O4	#N/A	Metabolic pathways;Biosynthesis of secondary metabolites;Microbial metabolism in diverse environments;Degradation of aromatic compounds;ABC transporters;Aminobenzoate degradation;Other	rp
FAUX	1,3-benzodioxole-5-carboxylicacid@5.392-rp	1,3-benzodioxole-5-carboxylicacid	166.027	5.392	C8H6O4	#N/A	Metabolic pathways;Biosynthesis of secondary metabolites;Microbial metabolism in diverse environments;Degradation of aromatic compounds;ABC transporters;Aminobenzoate degradation;Other	rp
FAUX	GLYCERYL1-THIOGLYCOLATE@1.707-rp	GLYCERYL1-THIOGLYCOLATE	166.03	1.707	C5H10O4S	2298847	#N/A	rp
FAUX	CV5601000@5.079-rp	CV5601000	166.038	5.079	C7H6N2O3	11594	#N/A	rp
FAUX	Arabinonicacid@1.126-rp	Arabinonicacid	166.048	1.126	C5H10O6	#N/A	Metabolic pathways;Other	rp
FAUX	Arabinonicacid@8.661-rp	Arabinonicacid	166.048	8.661	C5H10O6	#N/A	Metabolic pathways;Biosynthesis of secondary metabolites;Microbial metabolism in diverse environments;Other	rp
FAUX	1-methylxanthine@5.445-rp	1-methylxanthine	166.049	5.445	C6H6N4O2	#N/A	Metabolic pathways;Biosynthesis of secondary metabolites;Microbial metabolism in diverse environments;Other	rp
FAUX	1-methylxanthine@2.477-rp	1-methylxanthine	166.049	2.477	C6H6N4O2	#N/A	Metabolic pathways;Biosynthesis of secondary metabolites;Microbial metabolism in diverse environments;Other	rp
FAUX	2-methoxy-2-phenylaceticacid@8.704-rp	2-methoxy-2-phenylaceticacid	166.063	8.704	C9H10O3	#N/A	Metabolic pathways;Biosynthesis of secondary metabolites;Microbial metabolism in diverse environments;Degradation of aromatic compounds;Phenylpropanoid biosynthesis;Phenylalanine metabolism;Tyrosine metabolism;Other	rp
FAUX	2-methoxy-2-phenylaceticacid@6.099-rp	2-methoxy-2-phenylaceticacid	166.063	6.099	C9H10O3	#N/A	Metabolic pathways;Biosynthesis of secondary metabolites;Microbial metabolism in diverse environments;Degradation of aromatic compounds;Phenylpropanoid biosynthesis;Phenylalanine metabolism;Tyrosine metabolism;Other	rp
FAUX	2-methoxy-2-phenylaceticacid@7.61-rp	2-methoxy-2-phenylaceticacid	166.063	7.61	C9H10O3	#N/A	Metabolic pathways;Biosynthesis of secondary metabolites;Microbial metabolism in diverse environments;Degradation of aromatic compounds;Phenylpropanoid biosynthesis;Phenylalanine metabolism;Tyrosine metabolism;Other	rp
FAUX	2-methoxy-2-phenylaceticacid@7.922-rp	2-methoxy-2-phenylaceticacid	166.063	7.922	C9H10O3	#N/A	Metabolic pathways;Biosynthesis of secondary metabolites;Microbial metabolism in diverse environments;Degradation of aromatic compounds;Phenylpropanoid biosynthesis;Phenylalanine metabolism;Tyrosine metabolism;Other	rp
FAUX	2-methoxy-2-phenylaceticacid@6.824-rp	2-methoxy-2-phenylaceticacid	166.063	6.824	C9H10O3	#N/A	Metabolic pathways;Biosynthesis of secondary metabolites;Microbial metabolism in diverse environments;Degradation of aromatic compounds;Phenylpropanoid biosynthesis;Phenylalanine metabolism;Tyrosine metabolism;Other	rp
FAUX	166.073@1.108-rp	#N/A	166.073	1.108	#N/A	#N/A	#N/A	rp
FAUX	N,N-DIMETHYL-4-NITROANILINE@5.125-rp	N,N-DIMETHYL-4-NITROANILINE	166.074	5.125	C8H10N2O2	7210	#N/A	rp
FAUX	N,N-DIMETHYL-4-NITROANILINE@1.516-rp	N,N-DIMETHYL-4-NITROANILINE	166.074	1.516	C8H10N2O2	7210	#N/A	rp
FAUX	?,?'-diglycerol@5.657-rp	?,?'-diglycerol	166.085	5.657	C6H14O5	39150	Metabolic pathways;ABC transporters;Other	rp
FAUX	?,?'-diglycerol@1.097-rp	?,?'-diglycerol	166.085	1.097	C6H14O5	39150	Metabolic pathways;ABC transporters;Other	rp
FAUX	166.09246@7.411-rp	#N/A	166.092	7.411	#N/A	#N/A	#N/A	rp
FAUX	166.09249@6.986-rp	#N/A	166.092	6.986	#N/A	#N/A	#N/A	rp
FAUX	8-Oxogeranial@9.766-rp	8-Oxogeranial	166.099	9.766	C10H14O2	#N/A	Metabolic pathways;Biosynthesis of secondary metabolites;Other	rp
FAUX	8-Oxogeranial@11.284-rp	8-Oxogeranial	166.099	11.284	C10H14O2	#N/A	Metabolic pathways;Biosynthesis of secondary metabolites;Other	rp
FAUX	8-Oxogeranial@14.335-rp	8-Oxogeranial	166.099	14.335	C10H14O2	#N/A	Metabolic pathways;Biosynthesis of secondary metabolites;Other	rp
FAUX	166.10285@6.033-rp	#N/A	166.103	6.033	#N/A	#N/A	#N/A	rp
FAUX	166.10289@6.34-rp	#N/A	166.103	6.34	#N/A	#N/A	#N/A	rp
FAUX	166.10303@1.094-rp	#N/A	166.103	1.094	#N/A	#N/A	#N/A	rp
FAUX	166.10305@5.684-rp	#N/A	166.103	5.684	#N/A	#N/A	#N/A	rp
FAUX	1-Adamantanemethanol@17.818-rp	1-Adamantanemethanol	166.136	17.818	C11H18O	58119	#N/A	rp
FAUX	1-Adamantanemethanol@12.837-rp	1-Adamantanemethanol	166.136	12.837	C11H18O	58119	#N/A	rp
FAUX	166.56616@4.757-rp	#N/A	166.566	4.757	#N/A	#N/A	#N/A	rp
FAUX	2-Mercaptobenzothiazole@10.13-rp	2-Mercaptobenzothiazole	166.986	10.13	C7H5NS2	608157	#N/A	rp
FAUX	166.99118@1.214-rp	#N/A	166.991	1.214	C2H6N3O2PS	#N/A	#N/A	rp
FAUX	6,8-Dioxo-6,7,8,9-tetrahydro-1H-purin-2-olate@1.851-rp	6,8-Dioxo-6,7,8,9-tetrahydro-1H-purin-2-olate	167.021	1.851	C5H3N4O3	469433	Metabolic pathways;Microbial metabolism in diverse environments;Biosynthesis of plant secondary metabolites;Tryptophan metabolism;Aminobenzoate degradation;Other	rp
FAUX	Dipicolinicacid@2.616-rp	Dipicolinicacid	167.022	2.616	C7H5NO4	9940	Metabolic pathways;Microbial metabolism in diverse environments;Biosynthesis of plant secondary metabolites;Tryptophan metabolism;Aminobenzoate degradation;Other	rp
FAUX	Dipicolinicacid@1.176-rp	Dipicolinicacid	167.022	1.176	C7H5NO4	9940	Metabolic pathways;Microbial metabolism in diverse environments;Biosynthesis of plant secondary metabolites;Tryptophan metabolism;Aminobenzoate degradation;Other	rp
FAUX	acetyltaurine@1.336-rp	acetyltaurine	167.025	1.336	C4H9NO4S	140553	#N/A	rp
FAUX	acetyltaurine@1.483-rp	acetyltaurine	167.025	1.483	C4H9NO4S	140553	#N/A	rp
FAUX	7,8-dihydro-8-oxoguanine@1.635-rp	7,8-dihydro-8-oxoguanine	167.044	1.635	C5H5N5O2	58661	#N/A	rp
FAUX	7,8-dihydro-8-oxoguanine@2.464-rp	7,8-dihydro-8-oxoguanine	167.044	2.464	C5H5N5O2	58661	#N/A	rp
FAUX	3-methoxyanthranilicacid@4.436-rp	3-methoxyanthranilicacid	167.058	4.436	C8H9NO3	224233	Metabolic pathways;Biosynthesis of secondary metabolites;Microbial metabolism in diverse environments;Tryptophan metabolism;Other	rp
FAUX	3-methoxyanthranilicacid@1.274-rp	3-methoxyanthranilicacid	167.058	1.274	C8H9NO3	224233	Metabolic pathways;Biosynthesis of secondary metabolites;Microbial metabolism in diverse environments;Tryptophan metabolism;Other	rp
FAUX	3-methoxyanthranilicacid@1.538-rp	3-methoxyanthranilicacid	167.058	1.538	C8H9NO3	224233	Metabolic pathways;Biosynthesis of secondary metabolites;Microbial metabolism in diverse environments;Tryptophan metabolism;Other	rp
FAUX	2,4-diamino-6-nitrotoluene@1.081-rp	2,4-diamino-6-nitrotoluene	167.07	1.081	C7H9N3O2	#N/A	Microbial metabolism in diverse environments;Other	rp
FAUX	2,4-diamino-6-nitrotoluene@0.993-rp	2,4-diamino-6-nitrotoluene	167.07	0.993	C7H9N3O2	#N/A	Microbial metabolism in diverse environments;Other	rp
FAUX	167.09374@5.65-rp	#N/A	167.094	5.65	#N/A	#N/A	Metabolic pathways;Biosynthesis of alkaloids derived from shikimate pathway;Tyrosine metabolism;Other	rp
FAUX	2-(dimethylamino)-5,6-dimethylpyrimidin-4-ol@1.517-rp	2-(dimethylamino)-5,6-dimethylpyrimidin-4-ol	167.106	1.517	C8H13N3O	84165	#N/A	rp
FAUX	167.10922@6.835-rp	#N/A	167.109	6.835	#N/A	#N/A	#N/A	rp
FAUX	167.10929@6.967-rp	#N/A	167.109	6.967	#N/A	#N/A	#N/A	rp
FAUX	167.4372@6.905-rp	#N/A	167.437	6.905	#N/A	#N/A	#N/A	rp
FAUX	167.97457@1.342-rp	#N/A	167.975	1.342	C4H2N4P2	#N/A	#N/A	rp
FAUX	168.00946@1.215-rp	#N/A	168.009	1.215	C4H8O5S	#N/A	#N/A	rp
FAUX	3-Sulfamoylalanine@1.453-rp	3-Sulfamoylalanine	168.02	1.453	C3H8N2O4S	24203649	#N/A	rp
FAUX	3-Sulfamoylalanine@1.162-rp	3-Sulfamoylalanine	168.021	1.162	C3H8N2O4S	24203649	#N/A	rp
FAUX	Uricacid@1.855-rp	Uricacid	168.028	1.855	C5H4N4O3	#N/A	Metabolic pathways;Microbial metabolism in diverse environments;Bile secretion;Other	rp
FAUX	1,2-dihydrophthalicacid@5.905-rp	1,2-dihydrophthalicacid	168.042	5.905	C8H8O4	81153	Metabolic pathways;Biosynthesis of secondary metabolites;Microbial metabolism in diverse environments;Degradation of aromatic compounds;Phenylalanine metabolism;Ubiquinone and other terpenoid-quinone biosynthesis;Tyrosine metabolism;Aminobenzoate degradation;Other	rp
FAUX	1,2-dihydrophthalicacid@1.194-rp	1,2-dihydrophthalicacid	168.042	1.194	C8H8O4	81153	Metabolic pathways;Biosynthesis of secondary metabolites;Microbial metabolism in diverse environments;Degradation of aromatic compounds;Phenylalanine metabolism;Ubiquinone and other terpenoid-quinone biosynthesis;Tyrosine metabolism;Aminobenzoate degradation;Other	rp
FAUX	1,2-dihydrophthalicacid@7.234-rp	1,2-dihydrophthalicacid	168.042	7.234	C8H8O4	81153	Metabolic pathways;Biosynthesis of secondary metabolites;Microbial metabolism in diverse environments;Degradation of aromatic compounds;Phenylalanine metabolism;Ubiquinone and other terpenoid-quinone biosynthesis;Tyrosine metabolism;Aminobenzoate degradation;Other	rp
FAUX	1,2-dihydrophthalicacid@1.934-rp	1,2-dihydrophthalicacid	168.042	1.934	C8H8O4	81153	Metabolic pathways;Biosynthesis of secondary metabolites;Microbial metabolism in diverse environments;Degradation of aromatic compounds;Phenylalanine metabolism;Ubiquinone and other terpenoid-quinone biosynthesis;Tyrosine metabolism;Aminobenzoate degradation;Other	rp
FAUX	1,2-dihydrophthalicacid@6.508-rp	1,2-dihydrophthalicacid	168.042	6.508	C8H8O4	81153	Metabolic pathways;Biosynthesis of secondary metabolites;Microbial metabolism in diverse environments;Degradation of aromatic compounds;Phenylalanine metabolism;Ubiquinone and other terpenoid-quinone biosynthesis;Tyrosine metabolism;Aminobenzoate degradation;Other	rp
FAUX	168.04546@2.139-rp	#N/A	168.045	2.139	C7H9N2OP	#N/A	#N/A	rp
FAUX	168.04582@1.547-rp	#N/A	168.046	1.547	C7H9N2OP	#N/A	#N/A	rp
FAUX	4-Nitro-o-anisidine@1.197-rp	4-Nitro-o-anisidine	168.053	1.197	C7H8N2O3	7060	#N/A	rp
FAUX	4-Nitro-o-anisidine@2.147-rp	4-Nitro-o-anisidine	168.054	2.147	C7H8N2O3	7060	#N/A	rp
FAUX	4-Nitro-o-anisidine@1.553-rp	4-Nitro-o-anisidine	168.054	1.553	C7H8N2O3	7060	#N/A	rp
FAUX	2-isopropyl-6-methylpyrimidine-4-thiol@1.062-rp	2-isopropyl-6-methylpyrimidine-4-thiol	168.072	1.062	C8H12N2S	5475024	#N/A	rp
FAUX	168.08755@1.025-rp	#N/A	168.088	1.025	C4H8N8	#N/A	#N/A	rp
FAUX	Pyridoxamine@1.519-rp	Pyridoxamine	168.09	1.519	C8H12N2O2	#N/A	Metabolic pathways;Microbial metabolism in diverse environments;Other	rp
FAUX	Pyridoxamine@5.126-rp	Pyridoxamine	168.09	5.126	C8H12N2O2	#N/A	Metabolic pathways;Microbial metabolism in diverse environments;Other	rp
FAUX	Pyridoxamine@1.104-rp	Pyridoxamine	168.09	1.104	C8H12N2O2	#N/A	Metabolic pathways;Microbial metabolism in diverse environments;Other	rp
FAUX	Pyridoxamine@4.07-rp	Pyridoxamine	168.09	4.07	C8H12N2O2	#N/A	Metabolic pathways;Microbial metabolism in diverse environments;Other	rp
FAUX	Pyridoxamine@2.694-rp	Pyridoxamine	168.09	2.694	C8H12N2O2	#N/A	Metabolic pathways;Microbial metabolism in diverse environments;Other	rp
FAUX	Diphenylmethane@13.634-rp	Diphenylmethane	168.093	13.634	C13H12	7299	#N/A	rp
FAUX	168.11345@15.525-rp	#N/A	168.113	15.525	#N/A	#N/A	#N/A	rp
FAUX	1-hydroxy-2-oxolimonene@15.522-rp	1-hydroxy-2-oxolimonene	168.115	15.522	C10H16O2	#N/A	Metabolic pathways;Biosynthesis of secondary metabolites;Degradation of aromatic compounds;Other	rp
FAUX	1-hydroxy-2-oxolimonene@17.817-rp	1-hydroxy-2-oxolimonene	168.115	17.817	C10H16O2	#N/A	Metabolic pathways;Biosynthesis of secondary metabolites;Degradation of aromatic compounds;Other	rp
FAUX	1-hydroxy-2-oxolimonene@10.692-rp	1-hydroxy-2-oxolimonene	168.115	10.692	C10H16O2	#N/A	Metabolic pathways;Biosynthesis of secondary metabolites;Degradation of aromatic compounds;Other	rp
FAUX	168.58757@6.95-rp	#N/A	168.588	6.95	#N/A	#N/A	#N/A	rp
FAUX	168.58762@1.237-rp	#N/A	168.588	1.237	#N/A	#N/A	#N/A	rp
FAUX	168.985@1.006-rp	#N/A	168.985	1.006	#N/A	#N/A	#N/A	rp
FAUX	168.9869@1.005-rp	#N/A	168.987	1.005	#N/A	#N/A	#N/A	rp
FAUX	169.00511@1.735-rp	#N/A	169.005	1.735	C4H3N5OS	#N/A	Metabolic pathways;Other	rp
FAUX	169.0052@1.36-rp	#N/A	169.005	1.36	C3H9NO3P2	#N/A	Metabolic pathways;Other	rp
FAUX	(2E)-2-(2-Furylmethylene)hydrazinecarbothioamide@1.851-rp	(2E)-2-(2-Furylmethylene)hydrazinecarbothioamide	169.032	1.851	C6H7N3OS	4941360	#N/A	rp
FAUX	169.03521@1.086-rp	#N/A	169.035	1.086	C3H3N7O2	#N/A	#N/A	rp
FAUX	3-methylpyrrole-2,4-dicarboxylicacid@1.138-rp	3-methylpyrrole-2,4-dicarboxylicacid	169.038	1.138	C7H7NO4	#N/A	Biosynthesis of secondary metabolites;Microbial metabolism in diverse environments;Degradation of aromatic compounds;Other	rp
FAUX	1-Amino-4-hydroxy-2-butanesulfonicacid@1.176-rp	1-Amino-4-hydroxy-2-butanesulfonicacid	169.041	1.176	C4H11NO4S	20177	#N/A	rp
FAUX	Phosphodimethylethanolamine@1.101-rp	Phosphodimethylethanolamine	169.051	1.101	C4H12NO4P	#N/A	Other	rp
FAUX	1-Naphthylisocyanate@9.67-rp	1-Naphthylisocyanate	169.053	9.67	C11H7NO	59958	#N/A	rp
FAUX	1-Naphthylisocyanate@3.146-rp	1-Naphthylisocyanate	169.053	3.146	C11H7NO	59958	#N/A	rp
FAUX	1-Naphthylisocyanate@6.88-rp	1-Naphthylisocyanate	169.053	6.88	C11H7NO	59958	#N/A	rp
FAUX	169.05797@3.484-rp	#N/A	169.058	3.484	C4H11NO6	#N/A	#N/A	rp
FAUX	169.07288@1.531-rp	#N/A	169.073	1.531	#N/A	#N/A	Metabolic pathways;Microbial metabolism in diverse environments;Tyrosine metabolism;Other	rp
FAUX	6-hydroxydopamine@1.531-rp	6-hydroxydopamine	169.074	1.531	C8H11NO3	#N/A	Metabolic pathways;Microbial metabolism in diverse environments;Tyrosine metabolism;Other	rp
FAUX	6-hydroxydopamine@1.189-rp	6-hydroxydopamine	169.074	1.189	C8H11NO3	#N/A	Metabolic pathways;Microbial metabolism in diverse environments;Tyrosine metabolism;Other	rp
FAUX	1-methylhistidine@1.086-rp	1-methylhistidine	169.085	1.086	C7H11N3O2	#N/A	Metabolic pathways;Other	rp
FAUX	169.43752@7.705-rp	#N/A	169.438	7.705	#N/A	#N/A	#N/A	rp
FAUX	169.5372@4.203-rp	#N/A	169.537	4.203	#N/A	#N/A	#N/A	rp
FAUX	169.57678@1.111-rp	#N/A	169.577	1.111	#N/A	#N/A	#N/A	rp
FAUX	169.58879@1.135-rp	#N/A	169.589	1.135	#N/A	#N/A	#N/A	rp
FAUX	169.58976@1.351-rp	#N/A	169.59	1.351	#N/A	#N/A	#N/A	rp
FAUX	169.58977@1.12-rp	#N/A	169.59	1.12	#N/A	#N/A	#N/A	rp
FAUX	169.59389@1.298-rp	#N/A	169.594	1.298	#N/A	#N/A	#N/A	rp
FAUX	169.59534@6.921-rp	#N/A	169.595	6.921	#N/A	#N/A	#N/A	rp
FAUX	169.59536@1.272-rp	#N/A	169.595	1.272	#N/A	#N/A	#N/A	rp
FAUX	169.5954@6.489-rp	#N/A	169.595	6.489	#N/A	#N/A	#N/A	rp
FAUX	169.99685@5.084-rp	#N/A	169.997	5.084	C5H2N2O5	#N/A	#N/A	rp
FAUX	1-Methyluracil@1.706-rp	1-Methyluracil	170.033	1.706	C6H6N2O4	134202	#N/A	rp
FAUX	Ethylacetamidocyanoacetate@1.204-rp	Ethylacetamidocyanoacetate	170.069	1.204	C7H10N2O3	86118	#N/A	rp
FAUX	Ethylacetamidocyanoacetate@1.665-rp	Ethylacetamidocyanoacetate	170.069	1.665	C7H10N2O3	86118	#N/A	rp
FAUX	Ethylacetamidocyanoacetate@1.729-rp	Ethylacetamidocyanoacetate	170.069	1.729	C7H10N2O3	86118	#N/A	rp
FAUX	Ethylacetamidocyanoacetate@1.516-rp	Ethylacetamidocyanoacetate	170.069	1.516	C7H10N2O3	86118	#N/A	rp
FAUX	Ethylacetamidocyanoacetate@1.408-rp	Ethylacetamidocyanoacetate	170.07	1.408	C7H10N2O3	86118	#N/A	rp
FAUX	170.09307@6.794-rp	#N/A	170.093	6.794	#N/A	#N/A	#N/A	rp
FAUX	Etiracetam@7.126-rp	Etiracetam	170.106	7.126	C8H14N2O2	53863	#N/A	rp
FAUX	Etiracetam@8.267-rp	Etiracetam	170.106	8.267	C8H14N2O2	53863	#N/A	rp
FAUX	Etiracetam@5.671-rp	Etiracetam	170.106	5.671	C8H14N2O2	53863	#N/A	rp
FAUX	Etiracetam@2.023-rp	Etiracetam	170.106	2.023	C8H14N2O2	53863	#N/A	rp
FAUX	Etiracetam@8.965-rp	Etiracetam	170.106	8.965	C8H14N2O2	53863	#N/A	rp
FAUX	Etiracetam@1.416-rp	Etiracetam	170.106	1.416	C8H14N2O2	53863	#N/A	rp
FAUX	Etiracetam@1.793-rp	Etiracetam	170.106	1.793	C8H14N2O2	53863	#N/A	rp
FAUX	Etiracetam@1.53-rp	Etiracetam	170.106	1.53	C8H14N2O2	53863	#N/A	rp
FAUX	3,7-dimethylocta-1,6-dienediol@17.816-rp	3,7-dimethylocta-1,6-dienediol	170.131	17.816	C10H18O2	#N/A	Metabolic pathways;Biosynthesis of secondary metabolites;Biosynthesis of alkaloids derived from shikimate pathway;Biosynthesis of various secondary metabolites - part 2;Other	rp
FAUX	3,7-dimethylocta-1,6-dienediol@18.806-rp	3,7-dimethylocta-1,6-dienediol	170.131	18.806	C10H18O2	#N/A	Metabolic pathways;Biosynthesis of secondary metabolites;Biosynthesis of alkaloids derived from shikimate pathway;Biosynthesis of various secondary metabolites - part 2;Other	rp
FAUX	DimethylaminopropylMethacrylamide@7.255-rp	DimethylaminopropylMethacrylamide	170.142	7.255	C9H18N2O	71217	#N/A	rp
FAUX	DimethylaminopropylMethacrylamide@6.775-rp	DimethylaminopropylMethacrylamide	170.142	6.775	C9H18N2O	71217	#N/A	rp
FAUX	DimethylaminopropylMethacrylamide@1.058-rp	DimethylaminopropylMethacrylamide	170.142	1.058	C9H18N2O	71217	#N/A	rp
FAUX	170.52686@1.799-rp	#N/A	170.527	1.799	#N/A	#N/A	#N/A	rp
FAUX	170.5743@7.764-rp	#N/A	170.574	7.764	#N/A	#N/A	#N/A	rp
FAUX	170.57444@7.511-rp	#N/A	170.574	7.511	#N/A	#N/A	#N/A	rp
FAUX	170.5745@6.764-rp	#N/A	170.575	6.764	#N/A	#N/A	#N/A	rp
FAUX	170.5745@7.276-rp	#N/A	170.575	7.276	#N/A	#N/A	#N/A	rp
FAUX	170.58495@1.108-rp	#N/A	170.585	1.108	#N/A	#N/A	#N/A	rp
FAUX	170.96613@1.467-rp	#N/A	170.966	1.467	C2H5NO4S2	#N/A	#N/A	rp
FAUX	3-Cyanocoumarin@6.347-rp	3-Cyanocoumarin	171.032	6.347	C10H5NO2	176504	#N/A	rp
FAUX	171.03825@1.353-rp	#N/A	171.038	1.353	C3H9NO7	#N/A	#N/A	rp
FAUX	171.05102@1.064-rp	#N/A	171.051	1.064	C3H5N7O2	#N/A	#N/A	rp
FAUX	Tetrahydrodipicolinicacid@1.288-rp	Tetrahydrodipicolinicacid	171.053	1.288	C7H9NO4	#N/A	Metabolic pathways;Biosynthesis of secondary metabolites;Microbial metabolism in diverse environments;Biosynthesis of amino acids;Other	rp
FAUX	Tetrahydrodipicolinicacid@1.526-rp	Tetrahydrodipicolinicacid	171.053	1.526	C7H9NO4	#N/A	Metabolic pathways;Biosynthesis of secondary metabolites;Microbial metabolism in diverse environments;Biosynthesis of amino acids;Other	rp
FAUX	Tetrahydrodipicolinicacid@1.81-rp	Tetrahydrodipicolinicacid	171.053	1.81	C7H9NO4	#N/A	Metabolic pathways;Biosynthesis of secondary metabolites;Microbial metabolism in diverse environments;Biosynthesis of amino acids;Other	rp
FAUX	Tetrahydrodipicolinicacid@6.113-rp	Tetrahydrodipicolinicacid	171.053	6.113	C7H9NO4	#N/A	Metabolic pathways;Biosynthesis of secondary metabolites;Microbial metabolism in diverse environments;Biosynthesis of amino acids;Other	rp
FAUX	Metronidazole@1.106-rp	Metronidazole	171.064	1.106	C6H9N3O3	4029	#N/A	rp
FAUX	LoratadineimpurityH@2.166-rp	LoratadineimpurityH	171.09	2.166	C8H13NO3	31992	Other	rp
FAUX	LoratadineimpurityH@5.455-rp	LoratadineimpurityH	171.09	5.455	C8H13NO3	31992	Other	rp
FAUX	LoratadineimpurityH@1.271-rp	LoratadineimpurityH	171.09	1.271	C8H13NO3	31992	Other	rp
FAUX	LoratadineimpurityH@6.268-rp	LoratadineimpurityH	171.09	6.268	C8H13NO3	31992	Other	rp
FAUX	LoratadineimpurityH@1.373-rp	LoratadineimpurityH	171.09	1.373	C8H13NO3	31992	Other	rp
FAUX	1-Carbamimidoyl-4-piperidinecarboxylicacid@1.301-rp	1-Carbamimidoyl-4-piperidinecarboxylicacid	171.101	1.301	C7H13N3O2	4325474	#N/A	rp
FAUX	1-Carbamimidoyl-4-piperidinecarboxylicacid@1.11-rp	1-Carbamimidoyl-4-piperidinecarboxylicacid	171.101	1.11	C7H13N3O2	4325474	#N/A	rp
FAUX	1-Carbamimidoyl-4-piperidinecarboxylicacid@1.645-rp	1-Carbamimidoyl-4-piperidinecarboxylicacid	171.101	1.645	C7H13N3O2	4325474	#N/A	rp
FAUX	171.10643@6.577-rp	#N/A	171.106	6.577	#N/A	#N/A	#N/A	rp
FAUX	3621@10.871-rp	3621	171.108	10.871	C9H17NS	3333354	#N/A	rp
FAUX	3621@16.556-rp	3621	171.108	16.556	C9H17NS	3333354	#N/A	rp
FAUX	3621@20.11-rp	3621	171.108	20.11	C9H17NS	3333354	#N/A	rp
FAUX	171.10926@7.032-rp	#N/A	171.109	7.032	#N/A	#N/A	#N/A	rp
FAUX	171.10927@6.773-rp	#N/A	171.109	6.773	#N/A	#N/A	#N/A	rp
FAUX	(4-Ethyl-1-piperazinyl)acetate@6.471-rp	(4-Ethyl-1-piperazinyl)acetate	171.113	6.471	C8H15N2O2	14234583	#N/A	rp
FAUX	(4-Ethyl-1-piperazinyl)acetate@1.584-rp	(4-Ethyl-1-piperazinyl)acetate	171.113	1.584	C8H15N2O2	14234583	#N/A	rp
FAUX	1736378@11.982-rp	1736378	171.198	11.982	C11H25N	73758	#N/A	rp
FAUX	171.58223@7.014-rp	#N/A	171.582	7.014	#N/A	#N/A	#N/A	rp
FAUX	171.58226@8.156-rp	#N/A	171.582	8.156	#N/A	#N/A	#N/A	rp
FAUX	171.58234@7.397-rp	#N/A	171.582	7.397	#N/A	#N/A	#N/A	rp
FAUX	171.59281@6.763-rp	#N/A	171.593	6.763	#N/A	#N/A	#N/A	rp
FAUX	171.94818@12.867-rp	#N/A	171.948	12.867	C7H2Cl2O	#N/A	#N/A	rp
FAUX	171.95021@1.256-rp	#N/A	171.95	1.256	C4HN2O2PS	#N/A	#N/A	rp
FAUX	171.95021@1.482-rp	#N/A	171.95	1.482	C2H4O5S2	#N/A	#N/A	rp
FAUX	2,5-Thiophenedicarboxylicacid@1.867-rp	2,5-Thiophenedicarboxylicacid	171.983	1.867	C6H4O4S	19099	#N/A	rp
FAUX	172.00436@1.158-rp	#N/A	172.004	1.158	C3H8O6S	#N/A	#N/A	rp
FAUX	Glycerol-2-phosphate@1.159-rp	Glycerol-2-phosphate	172.014	1.159	C3H9O6P	#N/A	Metabolic pathways;Biosynthesis of secondary metabolites;ABC transporters;Other	rp
FAUX	172.02228@1.386-rp	#N/A	172.022	1.386	C3H8O8	#N/A	#N/A	rp
FAUX	172.03475@1.349-rp	#N/A	172.035	1.349	C3H4N6O3	#N/A	#N/A	rp
FAUX	172.03484@1.086-rp	#N/A	172.035	1.086	#N/A	#N/A	#N/A	rp
FAUX	Hydantoin-propionicacid@1.115-rp	Hydantoin-propionicacid	172.048	1.115	C6H8N2O4	#N/A	Other	rp
FAUX	Hydantoin-propionicacid@1.501-rp	Hydantoin-propionicacid	172.048	1.501	C6H8N2O4	#N/A	Other	rp
FAUX	Hydantoin-propionicacid@1.278-rp	Hydantoin-propionicacid	172.049	1.278	C6H8N2O4	#N/A	Other	rp
FAUX	Hydantoin-propionicacid@1.326-rp	Hydantoin-propionicacid	172.049	1.326	C6H8N2O4	#N/A	Other	rp
FAUX	2,6-Dioxohexahydro-4-pyrimidinecarbohydrazide@1.536-rp	2,6-Dioxohexahydro-4-pyrimidinecarbohydrazide	172.059	1.536	C5H8N4O3	2285473	#N/A	rp
FAUX	6-phenylpyridazin-3-ol@8.698-rp	6-phenylpyridazin-3-ol	172.064	8.698	C10H8N2O	67657	#N/A	rp
FAUX	Glycylproline@6.643-rp	Glycylproline	172.085	6.643	C7H12N2O3	#N/A	#N/A	rp
FAUX	Glycylproline@5.586-rp	Glycylproline	172.085	5.586	C7H12N2O3	#N/A	#N/A	rp
FAUX	Glycylproline@6.927-rp	Glycylproline	172.085	6.927	C7H12N2O3	#N/A	#N/A	rp
FAUX	Glycylproline@1.529-rp	Glycylproline	172.085	1.529	C7H12N2O3	#N/A	#N/A	rp
FAUX	Glycylproline@1.178-rp	Glycylproline	172.085	1.178	C7H12N2O3	#N/A	#N/A	rp
FAUX	Glycylproline@2.157-rp	Glycylproline	172.085	2.157	C7H12N2O3	#N/A	#N/A	rp
FAUX	Tryptoline@4.714-rp	Tryptoline	172.1	4.714	C11H12N2	96979	#N/A	rp
FAUX	Tryptoline@6.951-rp	Tryptoline	172.101	6.951	C11H12N2	96979	#N/A	rp
FAUX	Cyclohexylmethylcarbamimidothioate@6.072-rp	Cyclohexylmethylcarbamimidothioate	172.103	6.072	C8H16N2S	30785723	#N/A	rp
FAUX	epsilon-guanidinocaproate@1.529-rp	epsilon-guanidinocaproate	172.108	1.529	C7H14N3O2	19956675	#N/A	rp
FAUX	epsilon-guanidinocaproate@1.345-rp	epsilon-guanidinocaproate	172.109	1.345	C7H14N3O2	19956675	Biosynthesis of secondary metabolites;Other	rp
FAUX	9-oxononanoicacid@6.569-rp	9-oxononanoicacid	172.109	6.569	C9H16O3	#N/A	Biosynthesis of secondary metabolites;Other	rp
FAUX	9-oxononanoicacid@15.527-rp	9-oxononanoicacid	172.11	15.527	C9H16O3	#N/A	Biosynthesis of secondary metabolites;Other	rp
FAUX	9-oxononanoicacid@6.915-rp	9-oxononanoicacid	172.11	6.915	C9H16O3	#N/A	Biosynthesis of secondary metabolites;Other	rp
FAUX	9-oxononanoicacid@6.17-rp	9-oxononanoicacid	172.11	6.17	C9H16O3	#N/A	Biosynthesis of secondary metabolites;Other	rp
FAUX	DimethylAdipimidate@1.53-rp	DimethylAdipimidate	172.121	1.53	C8H16N2O2	10608200	#N/A	rp
FAUX	DimethylAdipimidate@6.502-rp	DimethylAdipimidate	172.121	6.502	C8H16N2O2	10608200	#N/A	rp
FAUX	DimethylAdipimidate@5.757-rp	DimethylAdipimidate	172.121	5.757	C8H16N2O2	10608200	#N/A	rp
FAUX	DimethylAdipimidate@5.494-rp	DimethylAdipimidate	172.121	5.494	C8H16N2O2	10608200	#N/A	rp
FAUX	DimethylAdipimidate@7.162-rp	DimethylAdipimidate	172.121	7.162	C8H16N2O2	10608200	#N/A	rp
FAUX	DimethylAdipimidate@8.286-rp	DimethylAdipimidate	172.121	8.286	C8H16N2O2	10608200	#N/A	rp
FAUX	DimethylAdipimidate@1.608-rp	DimethylAdipimidate	172.121	1.608	C8H16N2O2	10608200	#N/A	rp
FAUX	DimethylAdipimidate@1.161-rp	DimethylAdipimidate	172.121	1.161	C8H16N2O2	10608200	#N/A	rp
FAUX	4-Pentylphenylacetylene@13.428-rp	4-Pentylphenylacetylene	172.125	13.428	C13H16	2055502	#N/A	rp
FAUX	4-Pentylphenylacetylene@13.958-rp	4-Pentylphenylacetylene	172.125	13.958	C13H16	2055502	#N/A	rp
FAUX	4-Pentylphenylacetylene@15.528-rp	4-Pentylphenylacetylene	172.125	15.528	C13H16	2055502	#N/A	rp
FAUX	4-Pentylphenylacetylene@13.559-rp	4-Pentylphenylacetylene	172.125	13.559	C13H16	2055502	#N/A	rp
FAUX	Acetylagmatine@1.621-rp	Acetylagmatine	172.132	1.621	C7H16N4O	20137101	#N/A	rp
FAUX	3933966@2.049-rp	3933966	172.158	2.049	C9H20N2O	76318	#N/A	rp
FAUX	172.44367@7.076-rp	#N/A	172.444	7.076	#N/A	#N/A	#N/A	rp
FAUX	172.53189@6.44-rp	#N/A	172.532	6.44	#N/A	#N/A	#N/A	rp
FAUX	172.54567@1.213-rp	#N/A	172.546	1.213	#N/A	#N/A	#N/A	rp
FAUX	172.54729@1.197-rp	#N/A	172.547	1.197	#N/A	#N/A	#N/A	rp
FAUX	172.58828@6.52-rp	#N/A	172.588	6.52	#N/A	#N/A	#N/A	rp
FAUX	172.60069@1.08-rp	#N/A	172.601	1.08	#N/A	#N/A	#N/A	rp
FAUX	172.6189@6.936-rp	#N/A	172.619	6.936	#N/A	#N/A	#N/A	rp
FAUX	4-aminobenzenesulfonicacid@4.038-rp	4-aminobenzenesulfonicacid	173.015	4.038	C6H7NO3S	#N/A	Microbial metabolism in diverse environments;Aminobenzoate degradation;Other	rp
FAUX	4-aminobenzenesulfonicacid@1.249-rp	4-aminobenzenesulfonicacid	173.015	1.249	C6H7NO3S	#N/A	Microbial metabolism in diverse environments;Aminobenzoate degradation;Other	rp
FAUX	1877554@1.356-rp	1877554	173.023	1.356	C8H3N3O2	87952	#N/A	rp
FAUX	(2,6-Dioxo-4-morpholinyl)aceticacid@1.158-rp	(2,6-Dioxo-4-morpholinyl)aceticacid	173.033	1.158	C6H7NO5	148261	#N/A	rp
FAUX	2-Amino-4-oxo-4H-pyrrolo[2,3-d]pyrimidine-5-carbonitrile@1.188-rp	2-Amino-4-oxo-4H-pyrrolo[2,3-d]pyrimidine-5-carbonitrile	173.034	1.188	C7H3N5O	2570457	#N/A	rp
FAUX	173.03589@1.366-rp	#N/A	173.036	1.366	C5H8N3O2P	#N/A	#N/A	rp
FAUX	L-Azaserine@1.235-rp	L-Azaserine	173.044	1.235	C5H7N3O4	16735688	#N/A	rp
FAUX	Carboxymethylproline@5.049-rp	Carboxymethylproline	173.069	5.049	C7H11NO4	#N/A	Metabolic pathways;Biosynthesis of secondary metabolites;2-Oxocarboxylic acid metabolism;Biosynthesis of amino acids;Arginine and proline metabolism;Other	rp
FAUX	Carboxymethylproline@1.205-rp	Carboxymethylproline	173.069	1.205	C7H11NO4	#N/A	Metabolic pathways;Biosynthesis of secondary metabolites;2-Oxocarboxylic acid metabolism;Biosynthesis of amino acids;Arginine and proline metabolism;Other	rp
FAUX	Carboxymethylproline@1.585-rp	Carboxymethylproline	173.069	1.585	C7H11NO4	#N/A	Metabolic pathways;Biosynthesis of secondary metabolites;2-Oxocarboxylic acid metabolism;Biosynthesis of amino acids;Arginine and proline metabolism;Other	rp
FAUX	2-oxoarginine@1.277-rp	2-oxoarginine	173.08	1.277	C6H11N3O3	#N/A	Metabolic pathways;Arginine and proline metabolism;Other	rp
FAUX	2-oxoarginine@1.103-rp	2-oxoarginine	173.08	1.103	C6H11N3O3	#N/A	Metabolic pathways;Arginine and proline metabolism;Other	rp
FAUX	173.08115@1.262-rp	#N/A	173.081	1.262	#N/A	#N/A	Metabolic pathways;Arginine and proline metabolism;Other	rp
FAUX	173.09268@6.673-rp	#N/A	173.093	6.673	#N/A	#N/A	#N/A	rp
FAUX	173.09275@5.594-rp	#N/A	173.093	5.594	#N/A	#N/A	#N/A	rp
FAUX	173.09279@1.089-rp	#N/A	173.093	1.089	#N/A	#N/A	#N/A	rp
FAUX	Hexanoylglycine@1.291-rp	Hexanoylglycine	173.105	1.291	C8H15NO3	#N/A	Other	rp
FAUX	Hexanoylglycine@5.986-rp	Hexanoylglycine	173.105	5.986	C8H15NO3	#N/A	Other	rp
FAUX	Hexanoylglycine@6.917-rp	Hexanoylglycine	173.105	6.917	C8H15NO3	#N/A	Other	rp
FAUX	Hexanoylglycine@6.283-rp	Hexanoylglycine	173.105	6.283	C8H15NO3	#N/A	Other	rp
FAUX	173.11083@7.081-rp	#N/A	173.111	7.081	#N/A	#N/A	#N/A	rp
FAUX	173.11084@6.558-rp	#N/A	173.111	6.558	#N/A	#N/A	#N/A	rp
FAUX	173.11086@6.072-rp	#N/A	173.111	6.072	#N/A	#N/A	#N/A	rp
FAUX	173.11086@6.673-rp	#N/A	173.111	6.673	#N/A	#N/A	#N/A	rp
FAUX	173.11088@6.42-rp	#N/A	173.111	6.42	#N/A	#N/A	#N/A	rp
FAUX	173.11092@7.499-rp	#N/A	173.111	7.499	#N/A	#N/A	#N/A	rp
FAUX	173.11093@1.12-rp	#N/A	173.111	1.12	#N/A	#N/A	#N/A	rp
FAUX	173.11095@5.333-rp	#N/A	173.111	5.333	#N/A	#N/A	#N/A	rp
FAUX	(E)-N-5--(1-Aminoethylidene)-L-ornithine@1.939-rp	(E)-N-5--(1-Aminoethylidene)-L-ornithine	173.116	1.939	C7H15N3O2	#N/A	#N/A	rp
FAUX	(E)-N-5--(1-Aminoethylidene)-L-ornithine@1.823-rp	(E)-N-5--(1-Aminoethylidene)-L-ornithine	173.116	1.823	C7H15N3O2	#N/A	#N/A	rp
FAUX	173.12368@15.544-rp	#N/A	173.124	15.544	C9H19NS	#N/A	#N/A	rp
FAUX	173.12373@16.55-rp	#N/A	173.124	16.55	C9H19NS	#N/A	#N/A	rp
FAUX	argininamide@6.885-rp	argininamide	173.128	6.885	C6H15N5O	2147	#N/A	rp
FAUX	argininamide@7.697-rp	argininamide	173.128	7.697	C6H15N5O	2147	#N/A	rp
FAUX	1422990@2.177-rp	1422990	173.142	2.177	C9H19NO2	5202	#N/A	rp
FAUX	173.14903@12.908-rp	#N/A	173.149	12.908	#N/A	#N/A	#N/A	rp
FAUX	1-(3-dimethylaminopropyl)-3-ethylurea@1.527-rp	1-(3-dimethylaminopropyl)-3-ethylurea	173.153	1.527	C8H19N3O	3406708	#N/A	rp
FAUX	173.53553@1.086-rp	#N/A	173.536	1.086	#N/A	#N/A	#N/A	rp
FAUX	173.75717@7.483-rp	#N/A	173.757	7.483	#N/A	#N/A	#N/A	rp
FAUX	173.96579@1.236-rp	#N/A	173.966	1.236	C4H3N2O2PS	#N/A	#N/A	rp
FAUX	173.98427@1.641-rp	#N/A	173.984	1.641	C2H8O5P2	#N/A	#N/A	rp
FAUX	Phenolsulficacid@3.548-rp	Phenolsulficacid	173.999	3.548	C6H6O4S	#N/A	#N/A	rp
FAUX	cis-Aconiticacid@1.31-rp	cis-Aconiticacid	174.017	1.31	C6H6O6	#N/A	Metabolic pathways;Biosynthesis of secondary metabolites;Microbial metabolism in diverse environments;Biosynthesis of plant secondary metabolites;2-Oxocarboxylic acid metabolism;Biosynthesis of phenylpropanoids;Biosynthesis of alkaloids derived from shikimate pathway;Other	rp
FAUX	cis-Aconiticacid@1.487-rp	cis-Aconiticacid	174.017	1.487	C6H6O6	#N/A	Metabolic pathways;Biosynthesis of secondary metabolites;Microbial metabolism in diverse environments;Biosynthesis of plant secondary metabolites;2-Oxocarboxylic acid metabolism;Biosynthesis of phenylpropanoids;Biosynthesis of alkaloids derived from shikimate pathway;Other	rp
FAUX	Juglone@9.475-rp	Juglone	174.031	9.475	C10H6O3	3674	#N/A	rp
FAUX	174.03789@0.923-rp	#N/A	174.038	0.923	#N/A	#N/A	#N/A	rp
FAUX	1,3,5-Trinitroso-1,3,5-triazinane@1.092-rp	1,3,5-Trinitroso-1,3,5-triazinane	174.05	1.092	C3H6N6O3	24566	#N/A	rp
FAUX	2-isopropyl-3-oxosuccinicacid@1.822-rp	2-isopropyl-3-oxosuccinicacid	174.053	1.822	C7H10O5	#N/A	Metabolic pathways;Biosynthesis of secondary metabolites;Microbial metabolism in diverse environments;Biosynthesis of plant secondary metabolites;Degradation of aromatic compounds;2-Oxocarboxylic acid metabolism;Biosynthesis of phenylpropanoids;Biosynthesis of amino acids;Biosynthesis of alkaloids derived from shikimate pathway;Other	rp
FAUX	2-isopropyl-3-oxosuccinicacid@1.358-rp	2-isopropyl-3-oxosuccinicacid	174.053	1.358	C7H10O5	#N/A	Metabolic pathways;Biosynthesis of secondary metabolites;Microbial metabolism in diverse environments;Biosynthesis of plant secondary metabolites;Degradation of aromatic compounds;2-Oxocarboxylic acid metabolism;Biosynthesis of phenylpropanoids;Biosynthesis of amino acids;Biosynthesis of alkaloids derived from shikimate pathway;Other	rp
FAUX	Formylisoglutamine@1.149-rp	Formylisoglutamine	174.064	1.149	C6H10N2O4	31150592	Metabolic pathways;Other	rp
FAUX	Formylisoglutamine@1.47-rp	Formylisoglutamine	174.064	1.47	C6H10N2O4	31150592	Metabolic pathways;Other	rp
FAUX	Formylisoglutamine@1.335-rp	Formylisoglutamine	174.064	1.335	C6H10N2O4	31150592	Metabolic pathways;Other	rp
FAUX	1,2-dihydroxy-8-methylnaphthalene@12.237-rp	1,2-dihydroxy-8-methylnaphthalene	174.068	12.237	C11H10O2	#N/A	Microbial metabolism in diverse environments;Degradation of aromatic compounds;Other	rp
FAUX	1,2-dihydroxy-8-methylnaphthalene@9.802-rp	1,2-dihydroxy-8-methylnaphthalene	174.068	9.802	C11H10O2	#N/A	Microbial metabolism in diverse environments;Degradation of aromatic compounds;Other	rp
FAUX	4,4'-Thiobis-2-butanone@1.532-rp	4,4'-Thiobis-2-butanone	174.072	1.532	C8H14O2S	55839	#N/A	rp
FAUX	Indoleacetaldoxime@4.757-rp	Indoleacetaldoxime	174.079	4.757	C10H10N2O	#N/A	Metabolic pathways;Biosynthesis of secondary metabolites;2-Oxocarboxylic acid metabolism;Tryptophan metabolism;Other	rp
FAUX	Indoleacetaldoxime@3.15-rp	Indoleacetaldoxime	174.079	3.15	C10H10N2O	#N/A	Metabolic pathways;Biosynthesis of secondary metabolites;2-Oxocarboxylic acid metabolism;Tryptophan metabolism;Other	rp
FAUX	Indoleacetaldoxime@1.665-rp	Indoleacetaldoxime	174.079	1.665	C10H10N2O	#N/A	Metabolic pathways;Biosynthesis of secondary metabolites;2-Oxocarboxylic acid metabolism;Tryptophan metabolism;Other	rp
FAUX	2-propylglutaricacid@1.79-rp	2-propylglutaricacid	174.089	1.79	C8H14O4	#N/A	Other	rp
FAUX	2-propylglutaricacid@2.595-rp	2-propylglutaricacid	174.089	2.595	C8H14O4	#N/A	Other	rp
FAUX	2-propylglutaricacid@2.165-rp	2-propylglutaricacid	174.089	2.165	C8H14O4	#N/A	Other	rp
FAUX	N-acetylornithine@1.296-rp	N-acetylornithine	174.101	1.296	C7H14N2O3	#N/A	Metabolic pathways;Biosynthesis of secondary metabolites;2-Oxocarboxylic acid metabolism;Biosynthesis of amino acids;Other	rp
FAUX	N-acetylornithine@1.91-rp	N-acetylornithine	174.101	1.91	C7H14N2O3	#N/A	Metabolic pathways;Biosynthesis of secondary metabolites;2-Oxocarboxylic acid metabolism;Biosynthesis of amino acids;Other	rp
FAUX	N-acetylornithine@5.381-rp	N-acetylornithine	174.101	5.381	C7H14N2O3	#N/A	Metabolic pathways;Biosynthesis of secondary metabolites;2-Oxocarboxylic acid metabolism;Biosynthesis of amino acids;Other	rp
FAUX	N-acetylornithine@5.487-rp	N-acetylornithine	174.101	5.487	C7H14N2O3	#N/A	Metabolic pathways;Biosynthesis of secondary metabolites;2-Oxocarboxylic acid metabolism;Biosynthesis of amino acids;Other	rp
FAUX	N-acetylornithine@6.679-rp	N-acetylornithine	174.101	6.679	C7H14N2O3	#N/A	Metabolic pathways;Biosynthesis of secondary metabolites;2-Oxocarboxylic acid metabolism;Biosynthesis of amino acids;Other	rp
FAUX	3-Phenylcyclohexanone@13.957-rp	3-Phenylcyclohexanone	174.104	13.957	C12H14O	240794	#N/A	rp
FAUX	Arginine@1.083-rp	Arginine	174.112	1.083	C6H14N4O2	#N/A	Metabolic pathways;Biosynthesis of secondary metabolites;Biosynthesis of plant secondary metabolites;Biosynthesis of amino acids;ABC transporters;Arginine and proline metabolism;Other	rp
FAUX	DL-Arginine@6.56-rp	DL-Arginine	174.112	6.56	C6H14N4O2	227	Metabolic pathways;Biosynthesis of secondary metabolites;Biosynthesis of plant secondary metabolites;Biosynthesis of amino acids;ABC transporters;Arginine and proline metabolism;Other	rp
FAUX	{[(4S)-4,5-Diamino-5-oxopentyl]amino}(imino)methanaminium@1.096-rp	{[(4S)-4,5-Diamino-5-oxopentyl]amino}(imino)methanaminium	174.135	1.096	C6H16N5O	26332377	#N/A	rp
FAUX	ionene@10.676-rp	ionene	174.141	10.676	C13H18	61372	#N/A	rp
FAUX	ionene@13.431-rp	ionene	174.141	13.431	C13H18	61372	#N/A	rp
FAUX	ionene@13.112-rp	ionene	174.141	13.112	C13H18	61372	#N/A	rp
FAUX	ionene@19.348-rp	ionene	174.141	19.348	C13H18	61372	#N/A	rp
FAUX	ionene@15.088-rp	ionene	174.141	15.088	C13H18	61372	#N/A	rp
FAUX	ionene@17.818-rp	ionene	174.141	17.818	C13H18	61372	#N/A	rp
FAUX	ionene@16.221-rp	ionene	174.141	16.221	C13H18	61372	#N/A	rp
FAUX	ionene@15.539-rp	ionene	174.141	15.539	C13H18	61372	#N/A	rp
FAUX	ionene@9.327-rp	ionene	174.141	9.327	C13H18	61372	#N/A	rp
FAUX	174.96941@1.337-rp	#N/A	174.969	1.337	C3HN3O4S	#N/A	#N/A	rp
FAUX	175.00484@8.833-rp	#N/A	175.005	8.833	C6H2N5P	#N/A	#N/A	rp
FAUX	175.00928@0.943-rp	#N/A	175.009	0.943	CHN7O4	#N/A	#N/A	rp
FAUX	3-Acetyl-4-thiazolidinecarboxylicacid@1.274-rp	3-Acetyl-4-thiazolidinecarboxylicacid	175.03	1.274	C6H9NO3S	89354	#N/A	rp
FAUX	3-Acetyl-4-thiazolidinecarboxylicacid@1.671-rp	3-Acetyl-4-thiazolidinecarboxylicacid	175.03	1.671	C6H9NO3S	89354	#N/A	rp
FAUX	3-Acetyl-4-thiazolidinecarboxylicacid@2.509-rp	3-Acetyl-4-thiazolidinecarboxylicacid	175.03	2.509	C6H9NO3S	89354	#N/A	rp
FAUX	1,3-Dinitro-1,2,3,4-tetrahydro-1,3,5-triazine@0.912-rp	1,3-Dinitro-1,2,3,4-tetrahydro-1,3,5-triazine	175.033	0.912	C3H5N5O4	164217	#N/A	rp
FAUX	1,3-Dinitro-1,2,3,4-tetrahydro-1,3,5-triazine@6.397-rp	1,3-Dinitro-1,2,3,4-tetrahydro-1,3,5-triazine	175.035	6.397	C3H5N5O4	164217	#N/A	rp
FAUX	Bis(carbamoylamino)acetate@4.753-rp	Bis(carbamoylamino)acetate	175.047	4.753	C4H7N4O4	9533926	#N/A	rp
FAUX	N-acetylasparticacid@1.59-rp	N-acetylasparticacid	175.048	1.59	C6H9NO5	#N/A	Metabolic pathways;Other	rp
FAUX	N-acetylasparticacid@1.515-rp	N-acetylasparticacid	175.048	1.515	C6H9NO5	#N/A	Metabolic pathways;Other	rp
FAUX	N-acetylasparticacid@1.16-rp	N-acetylasparticacid	175.048	1.16	C6H9NO5	#N/A	Metabolic pathways;Other	rp
FAUX	7-cyano-7-carbaguanine@1.17-rp	7-cyano-7-carbaguanine	175.049	1.17	C7H5N5O	#N/A	Metabolic pathways;Other	rp
FAUX	Guanidinosuccinicacid@1.137-rp	Guanidinosuccinicacid	175.059	1.137	C5H9N3O4	#N/A	#N/A	rp
FAUX	175.06326@9.584-rp	#N/A	175.063	9.584	C4H10N5OP	#N/A	Metabolic pathways;Tryptophan metabolism;Other	rp
FAUX	3-acetoxyindole@6.857-rp	3-acetoxyindole	175.063	6.857	C10H9NO2	#N/A	Metabolic pathways;Tryptophan metabolism;Other	rp
FAUX	3-acetoxyindole@2.573-rp	3-acetoxyindole	175.063	2.573	C10H9NO2	#N/A	Metabolic pathways;Tryptophan metabolism;Other	rp
FAUX	(S)-2,5,5-trimethylthiazolidine-4-carboxylicacid@2.672-rp	(S)-2,5,5-trimethylthiazolidine-4-carboxylicacid	175.067	2.672	C7H13NO2S	2007178	#N/A	rp
FAUX	(S)-2,5,5-trimethylthiazolidine-4-carboxylicacid@2.977-rp	(S)-2,5,5-trimethylthiazolidine-4-carboxylicacid	175.067	2.977	C7H13NO2S	2007178	#N/A	rp
FAUX	Boc-Gly-OH@7.458-rp	Boc-Gly-OH	175.084	7.458	C7H13NO4	70660	#N/A	rp
FAUX	Boc-Gly-OH@7.313-rp	Boc-Gly-OH	175.084	7.313	C7H13NO4	70660	#N/A	rp
FAUX	Boc-Gly-OH@1.756-rp	Boc-Gly-OH	175.084	1.756	C7H13NO4	70660	#N/A	rp
FAUX	Boc-Gly-OH@6.438-rp	Boc-Gly-OH	175.084	6.438	C7H13NO4	70660	#N/A	rp
FAUX	Boc-Gly-OH@0.934-rp	Boc-Gly-OH	175.084	0.934	C7H13NO4	70660	#N/A	rp
FAUX	Boc-Gly-OH@1.975-rp	Boc-Gly-OH	175.084	1.975	C7H13NO4	70660	#N/A	rp
FAUX	Boc-Gly-OH@1.146-rp	Boc-Gly-OH	175.085	1.146	C7H13NO4	70660	#N/A	rp
FAUX	Citrulline@1.12-rp	Citrulline	175.096	1.12	C6H13N3O3	#N/A	Metabolic pathways;Biosynthesis of secondary metabolites;Biosynthesis of amino acids;Other	rp
FAUX	175.09718@6.612-rp	#N/A	175.097	6.612	#N/A	#N/A	#N/A	rp
FAUX	175.09719@6.956-rp	#N/A	175.097	6.956	#N/A	#N/A	#N/A	rp
FAUX	175.098@1.513-rp	#N/A	175.098	1.513	C5H14N5P	#N/A	#N/A	rp
FAUX	SKF-91488@6.921-rp	SKF-91488	175.115	6.921	C7H17N3S	5037	#N/A	rp
FAUX	175.11995@1.523-rp	#N/A	175.12	1.523	#N/A	#N/A	#N/A	rp
FAUX	2-Ethylhexylnitrate@1.537-rp	2-Ethylhexylnitrate	175.121	1.537	C8H17NO3	56557	#N/A	rp
FAUX	175.57716@1.127-rp	#N/A	175.577	1.127	#N/A	#N/A	#N/A	rp
FAUX	175.78105@7.081-rp	#N/A	175.781	7.081	#N/A	#N/A	#N/A	rp
FAUX	175.98516@1.072-rp	#N/A	175.985	1.072	C9H5PS	#N/A	#N/A	rp
FAUX	175.99985@0.948-rp	#N/A	176	0.948	C3H4N4O3S	#N/A	#N/A	rp
FAUX	2-hydroxy-3-oxoadipicacid@7.942-rp	2-hydroxy-3-oxoadipicacid	176.032	7.942	C6H8O6	4749323	Metabolic pathways;Biosynthesis of secondary metabolites;Microbial metabolism in diverse environments;Other	rp
FAUX	2-hydroxy-3-oxoadipicacid@6.99-rp	2-hydroxy-3-oxoadipicacid	176.032	6.99	C6H8O6	4749323	Metabolic pathways;Biosynthesis of secondary metabolites;Microbial metabolism in diverse environments;Other	rp
FAUX	2-hydroxy-3-oxoadipicacid@9.412-rp	2-hydroxy-3-oxoadipicacid	176.032	9.412	C6H8O6	4749323	Metabolic pathways;Biosynthesis of secondary metabolites;Microbial metabolism in diverse environments;Other	rp
FAUX	2-hydroxy-3-oxoadipicacid@8.493-rp	2-hydroxy-3-oxoadipicacid	176.032	8.493	C6H8O6	4749323	Metabolic pathways;Biosynthesis of secondary metabolites;Microbial metabolism in diverse environments;Other	rp
FAUX	2-hydroxy-3-oxoadipicacid@8.788-rp	2-hydroxy-3-oxoadipicacid	176.032	8.788	C6H8O6	4749323	Metabolic pathways;Biosynthesis of secondary metabolites;Microbial metabolism in diverse environments;Other	rp
FAUX	2-hydroxy-3-oxoadipicacid@1.229-rp	2-hydroxy-3-oxoadipicacid	176.032	1.229	C6H8O6	4749323	Metabolic pathways;Biosynthesis of secondary metabolites;Microbial metabolism in diverse environments;Other	rp
FAUX	2-hydroxy-3-oxoadipicacid@8.073-rp	2-hydroxy-3-oxoadipicacid	176.032	8.073	C6H8O6	4749323	Metabolic pathways;Biosynthesis of secondary metabolites;Microbial metabolism in diverse environments;Other	rp
FAUX	2-hydroxy-3-oxoadipicacid@14.632-rp	2-hydroxy-3-oxoadipicacid	176.032	14.632	C6H8O6	4749323	Metabolic pathways;Biosynthesis of secondary metabolites;Microbial metabolism in diverse environments;Other	rp
FAUX	Ureidosuccinicacid@1.341-rp	Ureidosuccinicacid	176.044	1.341	C5H8N2O5	273	Metabolic pathways;Other	rp
FAUX	4-methylumbelliferone@11.984-rp	4-methylumbelliferone	176.047	11.984	C10H8O3	#N/A	#N/A	rp
FAUX	4-methylumbelliferone@7.913-rp	4-methylumbelliferone	176.047	7.913	C10H8O3	#N/A	#N/A	rp
FAUX	2-isopropylmalicacid@2.744-rp	2-isopropylmalicacid	176.069	2.744	C7H12O5	#N/A	Metabolic pathways;Biosynthesis of secondary metabolites;2-Oxocarboxylic acid metabolism;Biosynthesis of amino acids;Other	rp
FAUX	2-isopropylmalicacid@1.331-rp	2-isopropylmalicacid	176.069	1.331	C7H12O5	#N/A	Metabolic pathways;Biosynthesis of secondary metabolites;2-Oxocarboxylic acid metabolism;Biosynthesis of amino acids;Other	rp
FAUX	2-isopropylmalicacid@1.127-rp	2-isopropylmalicacid	176.069	1.127	C7H12O5	#N/A	Metabolic pathways;Biosynthesis of secondary metabolites;2-Oxocarboxylic acid metabolism;Biosynthesis of amino acids;Other	rp
FAUX	EDDA@1.097-rp	EDDA	176.08	1.097	C6H12N2O4	55826	Other	rp
FAUX	EDDA@1.528-rp	EDDA	176.08	1.528	C6H12N2O4	55826	Other	rp
FAUX	6-Methyl-2,4-Diaminopteridine@1.517-rp	6-Methyl-2,4-Diaminopteridine	176.081	1.517	C7H8N6	223468	#N/A	rp
FAUX	5,6,7,8-tetrahydro-2-naphthoicacid@11.727-rp	5,6,7,8-tetrahydro-2-naphthoicacid	176.083	11.727	C11H12O2	#N/A	Microbial metabolism in diverse environments;Degradation of aromatic compounds;Other	rp
FAUX	5,6,7,8-tetrahydro-2-naphthoicacid@14.209-rp	5,6,7,8-tetrahydro-2-naphthoicacid	176.083	14.209	C11H12O2	#N/A	Microbial metabolism in diverse environments;Degradation of aromatic compounds;Other	rp
FAUX	5,6,7,8-tetrahydro-2-naphthoicacid@17.832-rp	5,6,7,8-tetrahydro-2-naphthoicacid	176.084	17.832	C11H12O2	#N/A	Microbial metabolism in diverse environments;Degradation of aromatic compounds;Other	rp
FAUX	Cotinine@2.372-rp	Cotinine	176.095	2.372	C10H12N2O	#N/A	Metabolic pathways;Biosynthesis of secondary metabolites;Microbial metabolism in diverse environments;Biosynthesis of alkaloids derived from shikimate pathway;Tryptophan metabolism;Bile secretion;Other	rp
FAUX	Cotinine@1.969-rp	Cotinine	176.095	1.969	C10H12N2O	#N/A	Metabolic pathways;Biosynthesis of secondary metabolites;Microbial metabolism in diverse environments;Biosynthesis of alkaloids derived from shikimate pathway;Tryptophan metabolism;Bile secretion;Other	rp
FAUX	176.09598@15.528-rp	#N/A	176.096	15.528	C8H17O2P	#N/A	#N/A	rp
FAUX	12-Crown-4@4.963-rp	12-Crown-4	176.105	4.963	C8H16O4	8912	#N/A	rp
FAUX	3-PHENYL-3-METHYLHEXANE@15.531-rp	3-PHENYL-3-METHYLHEXANE	176.156	15.531	C13H20	15627	#N/A	rp
FAUX	3-PHENYL-3-METHYLHEXANE@9.435-rp	3-PHENYL-3-METHYLHEXANE	176.156	9.435	C13H20	15627	#N/A	rp
FAUX	3-PHENYL-3-METHYLHEXANE@15.918-rp	3-PHENYL-3-METHYLHEXANE	176.156	15.918	C13H20	15627	#N/A	rp
FAUX	3-PHENYL-3-METHYLHEXANE@15.323-rp	3-PHENYL-3-METHYLHEXANE	176.156	15.323	C13H20	15627	#N/A	rp
FAUX	3-PHENYL-3-METHYLHEXANE@17.916-rp	3-PHENYL-3-METHYLHEXANE	176.156	17.916	C13H20	15627	#N/A	rp
FAUX	3-PHENYL-3-METHYLHEXANE@19.234-rp	3-PHENYL-3-METHYLHEXANE	176.156	19.234	C13H20	15627	#N/A	rp
FAUX	3-PHENYL-3-METHYLHEXANE@18.184-rp	3-PHENYL-3-METHYLHEXANE	176.156	18.184	C13H20	15627	#N/A	rp
FAUX	176.44091@7.007-rp	#N/A	176.441	7.007	#N/A	#N/A	#N/A	rp
FAUX	1,3,5-Trihydroxy-1,3,5-triazinane-2,4,6-trione@1.067-rp	1,3,5-Trihydroxy-1,3,5-triazinane-2,4,6-trione	177.001	1.067	C3H3N3O6	8595153	#N/A	rp
FAUX	tidiacic@1.495-rp	tidiacic	177.01	1.495	C5H7NO4S	65123	#N/A	rp
FAUX	177.0171@1.068-rp	#N/A	177.017	1.068	C2H4ClN7O	#N/A	#N/A	rp
FAUX	Sulforaphane@10.515-rp	Sulforaphane	177.028	10.515	C6H11NOS2	5157	#N/A	rp
FAUX	TI5270000@6.602-rp	TI5270000	177.043	6.602	C9H7NO3	8051	#N/A	rp
FAUX	TI5270000@2.365-rp	TI5270000	177.043	2.365	C9H7NO3	8051	#N/A	rp
FAUX	TI5270000@6.214-rp	TI5270000	177.043	6.214	C9H7NO3	8051	#N/A	rp
FAUX	TI5270000@7.573-rp	TI5270000	177.043	7.573	C9H7NO3	8051	#N/A	rp
FAUX	N-formyl-methionine@1.441-rp	N-formyl-methionine	177.046	1.441	C6H11NO3S	#N/A	Other	rp
FAUX	N-formyl-methionine@3.415-rp	N-formyl-methionine	177.046	3.415	C6H11NO3S	#N/A	Other	rp
FAUX	177.05155@1.051-rp	#N/A	177.052	1.051	C4H3N9	#N/A	#N/A	rp
FAUX	4-hydroxy-4-methylglutamicacid@1.234-rp	4-hydroxy-4-methylglutamicacid	177.064	1.234	C6H11NO5	#N/A	Other	rp
FAUX	2-Amino-6-methyl-4(1H)-pteridinone@3.689-rp	2-Amino-6-methyl-4(1H)-pteridinone	177.065	3.689	C7H7N5O	62924	#N/A	rp
FAUX	Tetrahydroisoquinoline-3-carboxylicacid@6.309-rp	Tetrahydroisoquinoline-3-carboxylicacid	177.079	6.309	C10H11NO2	86184	#N/A	rp
FAUX	177.07903@2.309-rp	#N/A	177.079	2.309	C3H11N7S	#N/A	#N/A	rp
FAUX	Tetrahydroisoquinoline-3-carboxylicacid@7.322-rp	Tetrahydroisoquinoline-3-carboxylicacid	177.079	7.322	C10H11NO2	86184	#N/A	rp
FAUX	1920452@1.112-rp	1920452	177.1	1.112	C6H19NOSi2	81069	#N/A	rp
FAUX	Biguanide@7.519-rp	Biguanide	177.101	7.519	C8H11N5	4616	#N/A	rp
FAUX	Biguanide@8.237-rp	Biguanide	177.101	8.237	C8H11N5	4616	#N/A	rp
FAUX	2-(Hydroxymethyl)-1-methyl-3,4,5-piperidinetriol@0.902-rp	2-(Hydroxymethyl)-1-methyl-3,4,5-piperidinetriol	177.101	0.902	C7H15NO4	4228	#N/A	rp
FAUX	Biguanide@6.902-rp	Biguanide	177.101	6.902	C8H11N5	4616	#N/A	rp
FAUX	177.11324@5.97-rp	#N/A	177.113	5.97	#N/A	#N/A	#N/A	rp
FAUX	177.11325@7.006-rp	#N/A	177.113	7.006	#N/A	#N/A	#N/A	rp
FAUX	177.1133@7.543-rp	#N/A	177.113	7.543	#N/A	#N/A	#N/A	rp
FAUX	177.11376@1.265-rp	#N/A	177.114	1.265	C5H16N5P	#N/A	#N/A	rp
FAUX	177.5748@1.117-rp	#N/A	177.575	1.117	#N/A	#N/A	#N/A	rp
FAUX	177.5928@6.448-rp	#N/A	177.593	6.448	#N/A	#N/A	#N/A	rp
FAUX	177.59283@6.817-rp	#N/A	177.593	6.817	#N/A	#N/A	#N/A	rp
FAUX	177.59285@6.264-rp	#N/A	177.593	6.264	#N/A	#N/A	#N/A	rp
FAUX	177.59287@1.245-rp	#N/A	177.593	1.245	#N/A	#N/A	#N/A	rp
FAUX	177.90814@1.044-rp	#N/A	177.908	1.044	CH4ClO2PS2	#N/A	#N/A	rp
FAUX	177.98849@6.106-rp	#N/A	177.988	6.106	C3H3ClN4O3	#N/A	#N/A	rp
FAUX	177.98856@1.029-rp	#N/A	177.989	1.029	C2H3N4O4P	#N/A	#N/A	rp
FAUX	177.99392@1.514-rp	#N/A	177.994	1.514	C5H6O5S	#N/A	#N/A	rp
FAUX	177.99617@0.96-rp	#N/A	177.996	0.96	C4H7N2O2PS	#N/A	#N/A	rp
FAUX	178.03285@6.089-rp	#N/A	178.033	6.089	#N/A	#N/A	#N/A	rp
FAUX	178.03286@0.94-rp	#N/A	178.033	0.94	#N/A	#N/A	#N/A	rp
FAUX	2-nitro-4-isocyanatotoluene@1.535-rp	2-nitro-4-isocyanatotoluene	178.038	1.535	C8H6N2O3	65913	#N/A	rp
FAUX	Cysteinylglycine@1.214-rp	Cysteinylglycine	178.041	1.214	C5H10N2O3S	#N/A	Metabolic pathways;Other	rp
FAUX	Cysteinylglycine@7.108-rp	Cysteinylglycine	178.041	7.108	C5H10N2O3S	#N/A	Metabolic pathways;Other	rp
FAUX	1-keto-inositol@1.184-rp	1-keto-inositol	178.048	1.184	C6H10O6	#N/A	Metabolic pathways;Biosynthesis of secondary metabolites;Microbial metabolism in diverse environments;Other	rp
FAUX	Diethyl(diazomethyl)phosphonate@6.578-rp	Diethyl(diazomethyl)phosphonate	178.05	6.578	C5H11N2O3P	9118243	#N/A	rp
FAUX	2-Ethylsulfanyl-1H-benzoimidazole@10.288-rp	2-Ethylsulfanyl-1H-benzoimidazole	178.056	10.288	C9H10N2S	629280	#N/A	rp
FAUX	1,2-dihydroxy-3,4-epoxytetrahydronaphthalene@6.936-rp	1,2-dihydroxy-3,4-epoxytetrahydronaphthalene	178.063	6.936	C10H10O3	#N/A	Metabolic pathways;Biosynthesis of secondary metabolites;Phenylpropanoid biosynthesis;2-Oxocarboxylic acid metabolism;Biosynthesis of phenylpropanoids;Other	rp
FAUX	1,2-dihydroxy-3,4-epoxytetrahydronaphthalene@10.513-rp	1,2-dihydroxy-3,4-epoxytetrahydronaphthalene	178.063	10.513	C10H10O3	#N/A	Metabolic pathways;Biosynthesis of secondary metabolites;Phenylpropanoid biosynthesis;2-Oxocarboxylic acid metabolism;Biosynthesis of phenylpropanoids;Other	rp
FAUX	1,2-dihydroxy-3,4-epoxytetrahydronaphthalene@7.223-rp	1,2-dihydroxy-3,4-epoxytetrahydronaphthalene	178.063	7.223	C10H10O3	#N/A	Metabolic pathways;Biosynthesis of secondary metabolites;Phenylpropanoid biosynthesis;2-Oxocarboxylic acid metabolism;Biosynthesis of phenylpropanoids;Other	rp
FAUX	1,2-dihydroxy-3,4-epoxytetrahydronaphthalene@6.168-rp	1,2-dihydroxy-3,4-epoxytetrahydronaphthalene	178.063	6.168	C10H10O3	#N/A	Metabolic pathways;Biosynthesis of secondary metabolites;Phenylpropanoid biosynthesis;2-Oxocarboxylic acid metabolism;Biosynthesis of phenylpropanoids;Other	rp
FAUX	Alpha-L-Methyl-Fucose@1.417-rp	Alpha-L-Methyl-Fucose	178.084	1.417	C7H14O5	393896	#N/A	rp
FAUX	Alpha-L-Methyl-Fucose@1.532-rp	Alpha-L-Methyl-Fucose	178.084	1.532	C7H14O5	393896	#N/A	rp
FAUX	178.09039@6.567-rp	#N/A	178.09	6.567	C11H15P	#N/A	#N/A	rp
FAUX	Isomethyleugenol@8.835-rp	Isomethyleugenol	178.099	8.835	C11H14O2	#N/A	Metabolic pathways;Biosynthesis of secondary metabolites;Phenylpropanoid biosynthesis;Ubiquinone and other terpenoid-quinone biosynthesis	rp
FAUX	VV4640000@1.354-rp	VV4640000	178.103	1.354	C7H18O3Si	15413	#N/A	rp
FAUX	VV4640000@7.128-rp	VV4640000	178.103	7.128	C7H18O3Si	15413	#N/A	rp
FAUX	VV4640000@6.122-rp	VV4640000	178.103	6.122	C7H18O3Si	15413	#N/A	rp
FAUX	VV4640000@1.105-rp	VV4640000	178.103	1.105	C7H18O3Si	15413	#N/A	rp
FAUX	178.11957@1.554-rp	#N/A	178.12	1.554	#N/A	#N/A	#N/A	rp
FAUX	Triethyleneglycoldimethylether@1.533-rp	Triethyleneglycoldimethylether	178.121	1.533	C8H18O4	13835222	#N/A	rp
FAUX	Triethyleneglycoldimethylether@6.111-rp	Triethyleneglycoldimethylether	178.121	6.111	C8H18O4	13835222	#N/A	rp
FAUX	Triethyleneglycoldimethylether@7.101-rp	Triethyleneglycoldimethylether	178.121	7.101	C8H18O4	13835222	#N/A	rp
FAUX	Triethyleneglycoldimethylether@6.824-rp	Triethyleneglycoldimethylether	178.121	6.824	C8H18O4	13835222	#N/A	rp
FAUX	Triethyleneglycoldimethylether@6.596-rp	Triethyleneglycoldimethylether	178.121	6.596	C8H18O4	13835222	#N/A	rp
FAUX	Triethyleneglycoldimethylether@9.008-rp	Triethyleneglycoldimethylether	178.121	9.008	C8H18O4	13835222	#N/A	rp
FAUX	Propofol@13.013-rp	Propofol	178.136	13.013	C12H18O	4774	#N/A	rp
FAUX	Propofol@17.816-rp	Propofol	178.136	17.816	C12H18O	4774	#N/A	rp
FAUX	Propofol@15.525-rp	Propofol	178.136	15.525	C12H18O	4774	#N/A	rp
FAUX	Dodecahydro-1H-fluorene@17.815-rp	Dodecahydro-1H-fluorene	178.172	17.815	C13H22	20648	#N/A	rp
FAUX	178.56446@1.1-rp	#N/A	178.564	1.1	#N/A	#N/A	#N/A	rp
FAUX	178.76535@7.075-rp	#N/A	178.765	7.075	#N/A	#N/A	#N/A	rp
FAUX	178.85213@1.148-rp	#N/A	178.852	1.148	#N/A	#N/A	#N/A	rp
FAUX	S-carboxymethylcysteine@1.599-rp	S-carboxymethylcysteine	179.025	1.599	C5H9NO4S	#N/A	#N/A	rp
FAUX	TD1250000@8.759-rp	TD1250000	179.035	8.759	C5H10NO4P	504312	#N/A	rp
FAUX	TD1250000@7.933-rp	TD1250000	179.035	7.933	C5H10NO4P	504312	#N/A	rp
FAUX	3-succinoylpyridine@2.369-rp	3-succinoylpyridine	179.058	2.369	C9H9NO3	#N/A	Metabolic pathways;Biosynthesis of secondary metabolites;Microbial metabolism in diverse environments;Biosynthesis of alkaloids derived from shikimate pathway;Phenylalanine metabolism;Other	rp
FAUX	3-succinoylpyridine@1.529-rp	3-succinoylpyridine	179.058	1.529	C9H9NO3	#N/A	Metabolic pathways;Biosynthesis of secondary metabolites;Microbial metabolism in diverse environments;Biosynthesis of alkaloids derived from shikimate pathway;Phenylalanine metabolism;Other	rp
FAUX	3-succinoylpyridine@6.033-rp	3-succinoylpyridine	179.058	6.033	C9H9NO3	#N/A	Metabolic pathways;Biosynthesis of secondary metabolites;Microbial metabolism in diverse environments;Biosynthesis of alkaloids derived from shikimate pathway;Phenylalanine metabolism;Other	rp
FAUX	1-amino-1-deoxynositol@1.103-rp	1-amino-1-deoxynositol	179.079	1.103	C6H13NO5	#N/A	Metabolic pathways;Biosynthesis of secondary metabolites;Biosynthesis of various secondary metabolites - part 2;Other	rp
FAUX	7-aminomethyl-7-carbaguanine@6.163-rp	7-aminomethyl-7-carbaguanine	179.081	6.163	C7H9N5O	#N/A	Metabolic pathways;Other	rp
FAUX	7-aminomethyl-7-carbaguanine@5.222-rp	7-aminomethyl-7-carbaguanine	179.081	5.222	C7H9N5O	#N/A	Metabolic pathways;Other	rp
FAUX	7-aminomethyl-7-carbaguanine@5.677-rp	7-aminomethyl-7-carbaguanine	179.081	5.677	C7H9N5O	#N/A	Metabolic pathways;Other	rp
FAUX	7-aminomethyl-7-carbaguanine@4.71-rp	7-aminomethyl-7-carbaguanine	179.081	4.71	C7H9N5O	#N/A	Metabolic pathways;Other	rp
FAUX	179.0808@6.601-rp	#N/A	179.081	6.601	C7H17NS2	#N/A	Metabolic pathways;Other	rp
FAUX	7-aminomethyl-7-carbaguanine@3.688-rp	7-aminomethyl-7-carbaguanine	179.081	3.688	C7H9N5O	#N/A	Metabolic pathways;Other	rp
FAUX	179.0928@1.169-rp	#N/A	179.093	1.169	C4H14N5OP	#N/A	#N/A	rp
FAUX	3-amino-4-phenylbutanoicacid@10.396-rp	3-amino-4-phenylbutanoicacid	179.094	10.396	C10H13NO2	#N/A	Metabolic pathways;Biosynthesis of secondary metabolites;2-Oxocarboxylic acid metabolism;Biosynthesis of alkaloids derived from shikimate pathway;Other	rp
FAUX	3-amino-4-phenylbutanoicacid@1.988-rp	3-amino-4-phenylbutanoicacid	179.095	1.988	C10H13NO2	#N/A	Metabolic pathways;Biosynthesis of secondary metabolites;2-Oxocarboxylic acid metabolism;Biosynthesis of alkaloids derived from shikimate pathway;Other	rp
FAUX	6-Fluoro-2,5-dimethyl-1,2,3,4-tetrahydroquinoline@1.53-rp	6-Fluoro-2,5-dimethyl-1,2,3,4-tetrahydroquinoline	179.111	1.53	C11H14FN	26631455	#N/A	rp
FAUX	179.11207@1.524-rp	#N/A	179.112	1.524	#N/A	#N/A	#N/A	rp
FAUX	179.11642@6.517-rp	#N/A	179.116	6.517	C7H17NO4	#N/A	#N/A	rp
FAUX	179.11647@6.957-rp	#N/A	179.116	6.957	C7H17NO4	#N/A	#N/A	rp
FAUX	3-Amino-5-[3-(methylamino)propyl]-1H-pyrazole-4-carbonitrile@6.811-rp	3-Amino-5-[3-(methylamino)propyl]-1H-pyrazole-4-carbonitrile	179.117	6.811	C8H13N5	1584109	#N/A	rp
FAUX	179.11651@1.334-rp	#N/A	179.117	1.334	C7H17NO4	#N/A	#N/A	rp
FAUX	179.12898@7.479-rp	#N/A	179.129	7.479	#N/A	#N/A	#N/A	rp
FAUX	179.129@7.195-rp	#N/A	179.129	7.195	#N/A	#N/A	#N/A	rp
FAUX	179.12904@7.941-rp	#N/A	179.129	7.941	#N/A	#N/A	#N/A	rp
FAUX	179.12907@1.29-rp	#N/A	179.129	1.29	#N/A	#N/A	#N/A	rp
FAUX	179.53144@1.167-rp	#N/A	179.531	1.167	#N/A	#N/A	#N/A	rp
FAUX	179.57961@6.861-rp	#N/A	179.58	6.861	#N/A	#N/A	#N/A	rp
FAUX	179.57971@6.63-rp	#N/A	179.58	6.63	#N/A	#N/A	#N/A	rp
FAUX	179.59018@1.519-rp	#N/A	179.59	1.519	#N/A	#N/A	#N/A	rp
FAUX	179.60838@1.102-rp	#N/A	179.608	1.102	#N/A	#N/A	#N/A	rp
FAUX	179.60844@6.432-rp	#N/A	179.608	6.432	#N/A	#N/A	#N/A	rp
FAUX	179.6086@5.722-rp	#N/A	179.609	5.722	#N/A	#N/A	#N/A	rp
FAUX	179.97047@1.02-rp	#N/A	179.97	1.02	C8H4OS2	#N/A	#N/A	rp
FAUX	179.9713@1.002-rp	#N/A	179.971	1.002	#N/A	#N/A	#N/A	rp
FAUX	179.99284@0.954-rp	#N/A	179.993	0.954	C5H10OP2S	#N/A	#N/A	rp
FAUX	180.0095@1.214-rp	#N/A	180.01	1.214	C5H8O5S	#N/A	#N/A	rp
FAUX	180.02143@0.974-rp	#N/A	180.021	0.974	C5H4N6S	#N/A	#N/A	rp
FAUX	4-amino-7-nitrobenzofurazan@2.24-rp	4-amino-7-nitrobenzofurazan	180.029	2.24	C6H4N4O3	523237	#N/A	rp
FAUX	180.03032@0.94-rp	#N/A	180.03	0.94	C4H9N2O4P	#N/A	#N/A	rp
FAUX	2-hydroxy-3-hydroxyphenylpropenoicacid@9.46-rp	2-hydroxy-3-hydroxyphenylpropenoicacid	180.042	9.46	C9H8O4	#N/A	Metabolic pathways;Biosynthesis of secondary metabolites;Microbial metabolism in diverse environments;Biosynthesis of plant secondary metabolites;Degradation of aromatic compounds;Phenylpropanoid biosynthesis;2-Oxocarboxylic acid metabolism;Biosynthesis of phenylpropanoids;Biosynthesis of amino acids;Biosynthesis of alkaloids derived from shikimate pathway;Phenylalanine metabolism;Bile secretion;…	rp
FAUX	2-hydroxy-3-hydroxyphenylpropenoicacid@8.371-rp	2-hydroxy-3-hydroxyphenylpropenoicacid	180.042	8.371	C9H8O4	#N/A	Metabolic pathways;Biosynthesis of secondary metabolites;Microbial metabolism in diverse environments;Biosynthesis of plant secondary metabolites;Degradation of aromatic compounds;Phenylpropanoid biosynthesis;2-Oxocarboxylic acid metabolism;Biosynthesis of phenylpropanoids;Biosynthesis of amino acids;Biosynthesis of alkaloids derived from shikimate pathway;Phenylalanine metabolism;Bile secretion;…	rp
FAUX	2-hydroxy-3-hydroxyphenylpropenoicacid@5.339-rp	2-hydroxy-3-hydroxyphenylpropenoicacid	180.042	5.339	C9H8O4	#N/A	Metabolic pathways;Biosynthesis of secondary metabolites;Microbial metabolism in diverse environments;Biosynthesis of plant secondary metabolites;Degradation of aromatic compounds;Phenylpropanoid biosynthesis;2-Oxocarboxylic acid metabolism;Biosynthesis of phenylpropanoids;Biosynthesis of amino acids;Biosynthesis of alkaloids derived from shikimate pathway;Phenylalanine metabolism;Bile secretion;…	rp
FAUX	2-hydroxy-3-hydroxyphenylpropenoicacid@9.036-rp	2-hydroxy-3-hydroxyphenylpropenoicacid	180.042	9.036	C9H8O4	#N/A	Metabolic pathways;Biosynthesis of secondary metabolites;Microbial metabolism in diverse environments;Biosynthesis of plant secondary metabolites;Degradation of aromatic compounds;Phenylpropanoid biosynthesis;2-Oxocarboxylic acid metabolism;Biosynthesis of phenylpropanoids;Biosynthesis of amino acids;Biosynthesis of alkaloids derived from shikimate pathway;Phenylalanine metabolism;Bile secretion;…	rp
FAUX	2-hydroxy-3-hydroxyphenylpropenoicacid@9.776-rp	2-hydroxy-3-hydroxyphenylpropenoicacid	180.042	9.776	C9H8O4	#N/A	Metabolic pathways;Biosynthesis of secondary metabolites;Microbial metabolism in diverse environments;Biosynthesis of plant secondary metabolites;Degradation of aromatic compounds;Phenylpropanoid biosynthesis;2-Oxocarboxylic acid metabolism;Biosynthesis of phenylpropanoids;Biosynthesis of amino acids;Biosynthesis of alkaloids derived from shikimate pathway;Phenylalanine metabolism;Bile secretion;…	rp
FAUX	2-hydroxy-3-hydroxyphenylpropenoicacid@6.219-rp	2-hydroxy-3-hydroxyphenylpropenoicacid	180.042	6.219	C9H8O4	#N/A	Metabolic pathways;Biosynthesis of secondary metabolites;Microbial metabolism in diverse environments;Biosynthesis of plant secondary metabolites;Degradation of aromatic compounds;Phenylpropanoid biosynthesis;2-Oxocarboxylic acid metabolism;Biosynthesis of phenylpropanoids;Biosynthesis of amino acids;Biosynthesis of alkaloids derived from shikimate pathway;Phenylalanine metabolism;Bile secretion;…	rp
FAUX	2-hydroxy-3-hydroxyphenylpropenoicacid@6.493-rp	2-hydroxy-3-hydroxyphenylpropenoicacid	180.042	6.493	C9H8O4	#N/A	Metabolic pathways;Biosynthesis of secondary metabolites;Microbial metabolism in diverse environments;Biosynthesis of plant secondary metabolites;Degradation of aromatic compounds;Phenylpropanoid biosynthesis;2-Oxocarboxylic acid metabolism;Biosynthesis of phenylpropanoids;Biosynthesis of amino acids;Biosynthesis of alkaloids derived from shikimate pathway;Phenylalanine metabolism;Bile secretion;…	rp
FAUX	2-hydroxy-3-hydroxyphenylpropenoicacid@2.952-rp	2-hydroxy-3-hydroxyphenylpropenoicacid	180.043	2.952	C9H8O4	#N/A	Metabolic pathways;Biosynthesis of secondary metabolites;Microbial metabolism in diverse environments;Biosynthesis of plant secondary metabolites;Degradation of aromatic compounds;Phenylpropanoid biosynthesis;2-Oxocarboxylic acid metabolism;Biosynthesis of phenylpropanoids;Biosynthesis of amino acids;Biosynthesis of alkaloids derived from shikimate pathway;Phenylalanine metabolism;Bile secretion;…	rp
FAUX	2-hydroxy-3-hydroxyphenylpropenoicacid@7.217-rp	2-hydroxy-3-hydroxyphenylpropenoicacid	180.043	7.217	C9H8O4	#N/A	Metabolic pathways;Biosynthesis of secondary metabolites;Microbial metabolism in diverse environments;Biosynthesis of plant secondary metabolites;Degradation of aromatic compounds;Phenylpropanoid biosynthesis;2-Oxocarboxylic acid metabolism;Biosynthesis of phenylpropanoids;Biosynthesis of amino acids;Biosynthesis of alkaloids derived from shikimate pathway;Phenylalanine metabolism;Bile secretion;…	rp
FAUX	2-hydroxy-3-hydroxyphenylpropenoicacid@6.895-rp	2-hydroxy-3-hydroxyphenylpropenoicacid	180.043	6.895	C9H8O4	#N/A	Metabolic pathways;Biosynthesis of secondary metabolites;Microbial metabolism in diverse environments;Biosynthesis of plant secondary metabolites;Degradation of aromatic compounds;Phenylpropanoid biosynthesis;2-Oxocarboxylic acid metabolism;Biosynthesis of phenylpropanoids;Biosynthesis of amino acids;Biosynthesis of alkaloids derived from shikimate pathway;Phenylalanine metabolism;Bile secretion;…	rp
FAUX	5-methylthioribose@1.88-rp	5-methylthioribose	180.046	1.88	C6H12O4S	388938	Metabolic pathways;Biosynthesis of plant secondary metabolites;Other	rp
FAUX	5-methylthioribose@2.365-rp	5-methylthioribose	180.046	2.365	C6H12O4S	388938	Metabolic pathways;Biosynthesis of plant secondary metabolites;Other	rp
FAUX	180.04601@2.176-rp	#N/A	180.046	2.176	C8H9N2OP	#N/A	Metabolic pathways;Biosynthesis of plant secondary metabolites;Other	rp
FAUX	9-fluorenone@13.175-rp	9-fluorenone	180.057	13.175	C13H8O	#N/A	Metabolic pathways;Microbial metabolism in diverse environments;Other	rp
FAUX	9-fluorenone@12.951-rp	9-fluorenone	180.057	12.951	C13H8O	#N/A	Metabolic pathways;Microbial metabolism in diverse environments;Other	rp
FAUX	Allose@1.162-rp	Allose	180.064	1.162	C6H12O6	#N/A	Metabolic pathways;Biosynthesis of secondary metabolites;Microbial metabolism in diverse environments;Biosynthesis of plant secondary metabolites;Biosynthesis of phenylpropanoids;Biosynthesis of alkaloids derived from shikimate pathway;ABC transporters;Bile secretion;Other	rp
FAUX	Paraxanthine@1.111-rp	Paraxanthine	180.065	1.111	C7H8N4O2	4525	Metabolic pathways;Biosynthesis of secondary metabolites;Microbial metabolism in diverse environments;Biosynthesis of plant secondary metabolites;Other	rp
FAUX	180.06616@2.095-rp	#N/A	180.066	2.095	C5H13N2O3P	#N/A	Metabolic pathways;Biosynthesis of secondary metabolites;Other	rp
FAUX	180.06627@1.55-rp	#N/A	180.066	1.55	C5H13N2O3P	#N/A	Metabolic pathways;Biosynthesis of secondary metabolites;Other	rp
FAUX	Coniferylalcohol@5.346-rp	Coniferylalcohol	180.079	5.346	C10H12O3	#N/A	Metabolic pathways;Biosynthesis of secondary metabolites;Phenylpropanoid biosynthesis;Biosynthesis of phenylpropanoids;Biosynthesis of various secondary metabolites - part 2;Other	rp
FAUX	Coniferylalcohol@8.951-rp	Coniferylalcohol	180.079	8.951	C10H12O3	#N/A	Metabolic pathways;Biosynthesis of secondary metabolites;Phenylpropanoid biosynthesis;Biosynthesis of phenylpropanoids;Biosynthesis of various secondary metabolites - part 2;Other	rp
FAUX	180.0878@6.722-rp	#N/A	180.088	6.722	C5H8N8	#N/A	#N/A	rp
FAUX	(2-Amino-4-oxo-4,7-dihydro-1H-pyrrolo[2,3-d]pyrimidin-5-yl)methanaminium@1.101-rp	(2-Amino-4-oxo-4,7-dihydro-1H-pyrrolo[2,3-d]pyrimidin-5-yl)methanaminium	180.088	1.101	C7H10N5O	26331815	#N/A	rp
FAUX	3-hydroxykynurenamine@1.11-rp	3-hydroxykynurenamine	180.089	1.11	C9H12N2O2	#N/A	Metabolic pathways;Tryptophan metabolism	rp
FAUX	3-hydroxykynurenamine@4.6-rp	3-hydroxykynurenamine	180.09	4.6	C9H12N2O2	#N/A	Metabolic pathways;Tryptophan metabolism	rp
FAUX	180.09546@7.779-rp	#N/A	180.095	7.779	C6H18N2P2	#N/A	#N/A	rp
FAUX	180.09547@6.993-rp	#N/A	180.095	6.993	#N/A	#N/A	#N/A	rp
FAUX	180.09556@6.691-rp	#N/A	180.096	6.691	#N/A	#N/A	#N/A	rp
FAUX	180.09932@1.1-rp	#N/A	180.099	1.1	#N/A	#N/A	#N/A	rp
FAUX	5-(1-Azabicyclo[2.2.1]hept-3-yl)-1,2,4-oxadiazol-3-amine@1.143-rp	5-(1-Azabicyclo[2.2.1]hept-3-yl)-1,2,4-oxadiazol-3-amine	180.101	1.143	C8H12N4O	143778	#N/A	rp
FAUX	3-BHA@8.43-rp	3-BHA	180.115	8.43	C11H16O2	8145	#N/A	rp
FAUX	3-BHA@16.195-rp	3-BHA	180.115	16.195	C11H16O2	8145	#N/A	rp
FAUX	180.11864@6.927-rp	#N/A	180.119	6.927	#N/A	#N/A	#N/A	rp
FAUX	180.11867@1.156-rp	#N/A	180.119	1.156	#N/A	#N/A	#N/A	rp
FAUX	180.11867@6.585-rp	#N/A	180.119	6.585	#N/A	#N/A	#N/A	rp
FAUX	180.12512@7.099-rp	#N/A	180.125	7.099	#N/A	#N/A	#N/A	rp
FAUX	Rilmenidine@7.099-rp	Rilmenidine	180.126	7.099	C10H16N2O	61963	#N/A	rp
FAUX	1,1'-BICYCLOHEXYL-4-ONE@17.816-rp	1,1'-BICYCLOHEXYL-4-ONE	180.151	17.816	C12H20O	38041	#N/A	rp
FAUX	180.45297@7.368-rp	#N/A	180.453	7.368	#N/A	#N/A	#N/A	rp
FAUX	180.45307@6.972-rp	#N/A	180.453	6.972	#N/A	#N/A	#N/A	rp
FAUX	180.59799@1.096-rp	#N/A	180.598	1.096	#N/A	#N/A	#N/A	rp
FAUX	180.61628@6.869-rp	#N/A	180.616	6.869	#N/A	#N/A	#N/A	rp
FAUX	180.97173@6.116-rp	#N/A	180.972	6.116	C2H4N3O3PS	#N/A	#N/A	rp
FAUX	(Phenylsulfonyl)acetonitrile@1.561-rp	(Phenylsulfonyl)acetonitrile	181.02	1.561	C8H7NO2S	74075	#N/A	rp
FAUX	181.02311@0.906-rp	#N/A	181.023	0.906	C4H7NO7	#N/A	#N/A	rp
FAUX	2-methyl-3-hydroxy-5-formylpyridine-4-carboxylicacid@2.013-rp	2-methyl-3-hydroxy-5-formylpyridine-4-carboxylicacid	181.038	2.013	C8H7NO4	#N/A	Biosynthesis of secondary metabolites;Microbial metabolism in diverse environments;Other	rp
FAUX	Methioninesulfone@1.618-rp	Methioninesulfone	181.041	1.618	C5H11NO4S	392966	#N/A	rp
FAUX	DH5670000@1.137-rp	DH5670000	181.049	1.137	C7H7N3O3	2925779	#N/A	rp
FAUX	4,6-Dimethyl-2H-[1,2,3]triazolo[4,5-d]pyrimidine-5,7(4H,6H)-dione@4.19-rp	4,6-Dimethyl-2H-[1,2,3]triazolo[4,5-d]pyrimidine-5,7(4H,6H)-dione	181.06	4.19	C6H7N5O2	86521	Other	rp
FAUX	4,6-Dimethyl-2H-[1,2,3]triazolo[4,5-d]pyrimidine-5,7(4H,6H)-dione@4.41-rp	4,6-Dimethyl-2H-[1,2,3]triazolo[4,5-d]pyrimidine-5,7(4H,6H)-dione	181.06	4.41	C6H7N5O2	86521	Other	rp
FAUX	4,6-Dimethyl-2H-[1,2,3]triazolo[4,5-d]pyrimidine-5,7(4H,6H)-dione@4.819-rp	4,6-Dimethyl-2H-[1,2,3]triazolo[4,5-d]pyrimidine-5,7(4H,6H)-dione	181.06	4.819	C6H7N5O2	86521	Other	rp
FAUX	4,6-Dimethyl-2H-[1,2,3]triazolo[4,5-d]pyrimidine-5,7(4H,6H)-dione@2.269-rp	4,6-Dimethyl-2H-[1,2,3]triazolo[4,5-d]pyrimidine-5,7(4H,6H)-dione	181.06	2.269	C6H7N5O2	86521	Other	rp
FAUX	Beta-tyrosine@2.991-rp	Beta-tyrosine	181.074	2.991	C9H11NO3	#N/A	Metabolic pathways;Biosynthesis of secondary metabolites;Biosynthesis of plant secondary metabolites;Phenylpropanoid biosynthesis;2-Oxocarboxylic acid metabolism;Biosynthesis of amino acids;Biosynthesis of alkaloids derived from shikimate pathway;Phenylalanine metabolism;Ubiquinone and other terpenoid-quinone biosynthesis;Tyrosine metabolism;Biosynthesis of various secondary metabolites - part 2;…	rp
FAUX	Beta-tyrosine@1.545-rp	Beta-tyrosine	181.074	1.545	C9H11NO3	#N/A	Metabolic pathways;Biosynthesis of secondary metabolites;Biosynthesis of plant secondary metabolites;Phenylpropanoid biosynthesis;2-Oxocarboxylic acid metabolism;Biosynthesis of amino acids;Biosynthesis of alkaloids derived from shikimate pathway;Phenylalanine metabolism;Ubiquinone and other terpenoid-quinone biosynthesis;Tyrosine metabolism;Biosynthesis of various secondary metabolites - part 2;…	rp
FAUX	Beta-tyrosine@1.992-rp	Beta-tyrosine	181.074	1.992	C9H11NO3	#N/A	Metabolic pathways;Biosynthesis of secondary metabolites;Biosynthesis of plant secondary metabolites;Phenylpropanoid biosynthesis;2-Oxocarboxylic acid metabolism;Biosynthesis of amino acids;Biosynthesis of alkaloids derived from shikimate pathway;Phenylalanine metabolism;Ubiquinone and other terpenoid-quinone biosynthesis;Tyrosine metabolism;Biosynthesis of various secondary metabolites - part 2;…	rp
FAUX	Beta-tyrosine@4.701-rp	Beta-tyrosine	181.074	4.701	C9H11NO3	#N/A	Metabolic pathways;Biosynthesis of secondary metabolites;Biosynthesis of plant secondary metabolites;Phenylpropanoid biosynthesis;2-Oxocarboxylic acid metabolism;Biosynthesis of amino acids;Biosynthesis of alkaloids derived from shikimate pathway;Phenylalanine metabolism;Ubiquinone and other terpenoid-quinone biosynthesis;Tyrosine metabolism;Biosynthesis of various secondary metabolites - part 2;…	rp
FAUX	caricotamide@1.087-rp	caricotamide	181.085	1.087	C8H11N3O2	357124	#N/A	rp
FAUX	181.11287@7.005-rp	#N/A	181.113	7.005	#N/A	#N/A	#N/A	rp
FAUX	181.57718@6.73-rp	#N/A	181.577	6.73	#N/A	#N/A	#N/A	rp
FAUX	2,2'-ThiodiglycolicAcid@1.187-rp	2,2'-ThiodiglycolicAcid	181.989	1.187	C4H6O6S	396724	#N/A	rp
FAUX	182.0044@0.998-rp	#N/A	182.004	0.998	C8H8OP2	#N/A	#N/A	rp
FAUX	(2S)-2-Hydroxy-2-[(2S)-2-oxiranyl]ethylmethanesulfonate@1.478-rp	(2S)-2-Hydroxy-2-[(2S)-2-oxiranyl]ethylmethanesulfonate	182.025	1.478	C5H10O5S	11520027	#N/A	rp
FAUX	(2S)-2-Hydroxy-2-[(2S)-2-oxiranyl]ethylmethanesulfonate@1.252-rp	(2S)-2-Hydroxy-2-[(2S)-2-oxiranyl]ethylmethanesulfonate	182.025	1.252	C5H10O5S	11520027	#N/A	rp
FAUX	1-methyluricacid@3.746-rp	1-methyluricacid	182.044	3.746	C6H6N4O3	#N/A	Other	rp
FAUX	3,4-dimethoxybenzoicacid@3.776-rp	3,4-dimethoxybenzoicacid	182.058	3.776	C9H10O4	#N/A	Metabolic pathways;Biosynthesis of secondary metabolites;Microbial metabolism in diverse environments;Degradation of aromatic compounds;Phenylalanine metabolism;Ubiquinone and other terpenoid-quinone biosynthesis;Tyrosine metabolism;Biosynthesis of various secondary metabolites - part 2;Other	rp
FAUX	3,4-dimethoxybenzoicacid@3.993-rp	3,4-dimethoxybenzoicacid	182.058	3.993	C9H10O4	#N/A	Metabolic pathways;Biosynthesis of secondary metabolites;Microbial metabolism in diverse environments;Degradation of aromatic compounds;Phenylalanine metabolism;Ubiquinone and other terpenoid-quinone biosynthesis;Tyrosine metabolism;Biosynthesis of various secondary metabolites - part 2;Other	rp
FAUX	3,4-dimethoxybenzoicacid@4.415-rp	3,4-dimethoxybenzoicacid	182.058	4.415	C9H10O4	#N/A	Metabolic pathways;Biosynthesis of secondary metabolites;Microbial metabolism in diverse environments;Degradation of aromatic compounds;Phenylalanine metabolism;Ubiquinone and other terpenoid-quinone biosynthesis;Tyrosine metabolism;Biosynthesis of various secondary metabolites - part 2;Other	rp
FAUX	3,4-dimethoxybenzoicacid@5.339-rp	3,4-dimethoxybenzoicacid	182.058	5.339	C9H10O4	#N/A	Metabolic pathways;Biosynthesis of secondary metabolites;Microbial metabolism in diverse environments;Degradation of aromatic compounds;Phenylalanine metabolism;Ubiquinone and other terpenoid-quinone biosynthesis;Tyrosine metabolism;Biosynthesis of various secondary metabolites - part 2;Other	rp
FAUX	3,4-dimethoxybenzoicacid@6.1-rp	3,4-dimethoxybenzoicacid	182.058	6.1	C9H10O4	#N/A	Metabolic pathways;Biosynthesis of secondary metabolites;Microbial metabolism in diverse environments;Degradation of aromatic compounds;Phenylalanine metabolism;Ubiquinone and other terpenoid-quinone biosynthesis;Tyrosine metabolism;Biosynthesis of various secondary metabolites - part 2;Other	rp
FAUX	3,4-dimethoxybenzoicacid@9.189-rp	3,4-dimethoxybenzoicacid	182.058	9.189	C9H10O4	#N/A	Metabolic pathways;Biosynthesis of secondary metabolites;Microbial metabolism in diverse environments;Degradation of aromatic compounds;Phenylalanine metabolism;Ubiquinone and other terpenoid-quinone biosynthesis;Tyrosine metabolism;Biosynthesis of various secondary metabolites - part 2;Other	rp
FAUX	3,4-dimethoxybenzoicacid@5.967-rp	3,4-dimethoxybenzoicacid	182.058	5.967	C9H10O4	#N/A	Metabolic pathways;Biosynthesis of secondary metabolites;Microbial metabolism in diverse environments;Degradation of aromatic compounds;Phenylalanine metabolism;Ubiquinone and other terpenoid-quinone biosynthesis;Tyrosine metabolism;Biosynthesis of various secondary metabolites - part 2;Other	rp
FAUX	3,4-dimethoxybenzoicacid@3.539-rp	3,4-dimethoxybenzoicacid	182.058	3.539	C9H10O4	#N/A	Metabolic pathways;Biosynthesis of secondary metabolites;Microbial metabolism in diverse environments;Degradation of aromatic compounds;Phenylalanine metabolism;Ubiquinone and other terpenoid-quinone biosynthesis;Tyrosine metabolism;Biosynthesis of various secondary metabolites - part 2;Other	rp
FAUX	182.06141@1.33-rp	#N/A	182.061	1.33	C8H11N2OP	#N/A	#N/A	rp
FAUX	MFCD00182654@1.713-rp	MFCD00182654	182.069	1.713	C8H10N2O3	2109201	Metabolic pathways;Biosynthesis of secondary metabolites;Other	rp
FAUX	MFCD00182654@1.291-rp	MFCD00182654	182.069	1.291	C8H10N2O3	2109201	Metabolic pathways;Biosynthesis of secondary metabolites;Other	rp
FAUX	MFCD00182654@1.846-rp	MFCD00182654	182.069	1.846	C8H10N2O3	2109201	Metabolic pathways;Biosynthesis of secondary metabolites;Other	rp
FAUX	MFCD00182654@2.121-rp	MFCD00182654	182.069	2.121	C8H10N2O3	2109201	Metabolic pathways;Biosynthesis of secondary metabolites;Other	rp
FAUX	TEP@1.729-rp	TEP	182.071	1.729	C6H15O4P	6287	#N/A	rp
FAUX	Galactitol@1.11-rp	Galactitol	182.079	1.11	C6H14O6	#N/A	Metabolic pathways;ABC transporters;Other	rp
FAUX	182.08904@6.602-rp	#N/A	182.089	6.602	#N/A	#N/A	#N/A	rp
FAUX	Iridotrial@9.905-rp	Iridotrial	182.095	9.905	C10H14O3	8215220	Metabolic pathways;Biosynthesis of secondary metabolites;Other	rp
FAUX	Iridotrial@8.831-rp	Iridotrial	182.095	8.831	C10H14O3	8215220	Metabolic pathways;Biosynthesis of secondary metabolites;Other	rp
FAUX	182.10416@1.532-rp	#N/A	182.104	1.532	#N/A	#N/A	#N/A	rp
FAUX	(3,4-Dimethoxybenzyl)hydrazine@4.106-rp	(3,4-Dimethoxybenzyl)hydrazine	182.106	4.106	C9H14N2O2	8354	#N/A	rp
FAUX	(3,4-Dimethoxybenzyl)hydrazine@4.479-rp	(3,4-Dimethoxybenzyl)hydrazine	182.106	4.479	C9H14N2O2	8354	#N/A	rp
FAUX	(3,4-Dimethoxybenzyl)hydrazine@1.205-rp	(3,4-Dimethoxybenzyl)hydrazine	182.106	1.205	C9H14N2O2	8354	#N/A	rp
FAUX	(3,4-Dimethoxybenzyl)hydrazine@2.332-rp	(3,4-Dimethoxybenzyl)hydrazine	182.106	2.332	C9H14N2O2	8354	#N/A	rp
FAUX	(3,4-Dimethoxybenzyl)hydrazine@1.523-rp	(3,4-Dimethoxybenzyl)hydrazine	182.106	1.523	C9H14N2O2	8354	#N/A	rp
FAUX	(3,4-Dimethoxybenzyl)hydrazine@1.392-rp	(3,4-Dimethoxybenzyl)hydrazine	182.106	1.392	C9H14N2O2	8354	#N/A	rp
FAUX	(3,4-Dimethoxybenzyl)hydrazine@6.739-rp	(3,4-Dimethoxybenzyl)hydrazine	182.106	6.739	C9H14N2O2	8354	#N/A	rp
FAUX	(3,4-Dimethoxybenzyl)hydrazine@6.945-rp	(3,4-Dimethoxybenzyl)hydrazine	182.106	6.945	C9H14N2O2	8354	#N/A	rp
FAUX	(3,4-Dimethoxybenzyl)hydrazine@4.686-rp	(3,4-Dimethoxybenzyl)hydrazine	182.106	4.686	C9H14N2O2	8354	#N/A	rp
FAUX	(3,4-Dimethoxybenzyl)hydrazine@3.333-rp	(3,4-Dimethoxybenzyl)hydrazine	182.106	3.333	C9H14N2O2	8354	#N/A	rp
FAUX	4-benzyltoluene@13.63-rp	4-benzyltoluene	182.109	13.63	C14H14	62501	#N/A	rp
FAUX	Decahydro-2-naphthoicacid@15.524-rp	Decahydro-2-naphthoicacid	182.13	15.524	C11H18O2	#N/A	Microbial metabolism in diverse environments;Other	rp
FAUX	1,4'-Bipiperidin-2-one@1.095-rp	1,4'-Bipiperidin-2-one	182.142	1.095	C10H18N2O	13810930	#N/A	rp
FAUX	182.58518@1.103-rp	#N/A	182.585	1.103	#N/A	#N/A	#N/A	rp
FAUX	182.6033@7.165-rp	#N/A	182.603	7.165	#N/A	#N/A	#N/A	rp
FAUX	182.97359@1.073-rp	#N/A	182.974	1.073	#N/A	#N/A	#N/A	rp
FAUX	183.00532@1.087-rp	#N/A	183.005	1.087	C3H6ClN3O4	#N/A	#N/A	rp
FAUX	Homocysteicacid@1.476-rp	Homocysteicacid	183.02	1.476	C4H9NO5S	83163	Other	rp
FAUX	Homocysteicacid@1.2-rp	Homocysteicacid	183.02	1.2	C4H9NO5S	83163	Other	rp
FAUX	183.03806@6.118-rp	#N/A	183.038	6.118	#N/A	#N/A	#N/A	rp
FAUX	3,5-dihydroxyphenylglycine@1.285-rp	3,5-dihydroxyphenylglycine	183.053	1.285	C8H9NO4	8096190	Metabolic pathways;Biosynthesis of secondary metabolites;Microbial metabolism in diverse environments;Other	rp
FAUX	3,5-dihydroxyphenylglycine@2.987-rp	3,5-dihydroxyphenylglycine	183.053	2.987	C8H9NO4	8096190	Metabolic pathways;Biosynthesis of secondary metabolites;Microbial metabolism in diverse environments;Other	rp
FAUX	3,5-dihydroxyphenylglycine@1.912-rp	3,5-dihydroxyphenylglycine	183.053	1.912	C8H9NO4	8096190	Metabolic pathways;Biosynthesis of secondary metabolites;Microbial metabolism in diverse environments;Other	rp
FAUX	3,5-dihydroxyphenylglycine@1.525-rp	3,5-dihydroxyphenylglycine	183.053	1.525	C8H9NO4	8096190	Metabolic pathways;Biosynthesis of secondary metabolites;Microbial metabolism in diverse environments;Other	rp
FAUX	CholineO-Sulfate@1.173-rp	CholineO-Sulfate	183.057	1.173	C5H13NO4S	471	ABC transporters	rp
FAUX	183.05784@1.166-rp	#N/A	183.058	1.166	#N/A	#N/A	#N/A	rp
FAUX	183.05882@1.159-rp	#N/A	183.059	1.159	#N/A	#N/A	#N/A	rp
FAUX	4-amino-2-hydroxylamino-6-nitrotoluene@1.294-rp	4-amino-2-hydroxylamino-6-nitrotoluene	183.064	1.294	C7H9N3O3	#N/A	Microbial metabolism in diverse environments;Other	rp
FAUX	Cholinephosphate@1.119-rp	Cholinephosphate	183.066	1.119	C5H14NO4P	#N/A	#N/A	rp
FAUX	183.07721@1.542-rp	#N/A	183.077	1.542	C4H14N3O3P	#N/A	#N/A	rp
FAUX	183.08117@1.555-rp	#N/A	183.081	1.555	C9H14NOP	#N/A	#N/A	rp
FAUX	5-[(Ethylsulfanyl)methyl]-2-methyl-4-pyrimidinamine@1.547-rp	5-[(Ethylsulfanyl)methyl]-2-methyl-4-pyrimidinamine	183.083	1.547	C8H13N3S	9404014	#N/A	rp
FAUX	Adrenaline@1.343-rp	Adrenaline	183.09	1.343	C9H13NO3	#N/A	Metabolic pathways;Tyrosine metabolism;Other	rp
FAUX	Adrenaline@3.097-rp	Adrenaline	183.09	3.097	C9H13NO3	#N/A	Metabolic pathways;Tyrosine metabolism;Other	rp
FAUX	183.09525@1.276-rp	#N/A	183.095	1.276	#N/A	#N/A	#N/A	rp
FAUX	183.09566@7.138-rp	#N/A	183.096	7.138	#N/A	#N/A	#N/A	rp
FAUX	MFCD01318772@1.094-rp	MFCD01318772	183.101	1.094	C8H13N3O2	389250	#N/A	rp
FAUX	183.43724@7.171-rp	#N/A	183.437	7.171	#N/A	#N/A	#N/A	rp
FAUX	183.55993@4.531-rp	#N/A	183.56	4.531	#N/A	#N/A	#N/A	rp
FAUX	183.61084@1.521-rp	#N/A	183.611	1.521	#N/A	#N/A	#N/A	rp
FAUX	183.61103@7.451-rp	#N/A	183.611	7.451	#N/A	#N/A	#N/A	rp
FAUX	183.61107@6.566-rp	#N/A	183.611	6.566	#N/A	#N/A	#N/A	rp
FAUX	183.61116@7.794-rp	#N/A	183.611	7.794	#N/A	#N/A	#N/A	rp
FAUX	2-pyrone-4,6-dicarboxylicacid@1.638-rp	2-pyrone-4,6-dicarboxylicacid	184.001	1.638	C7H4O6	#N/A	Metabolic pathways;Microbial metabolism in diverse environments;Aminobenzoate degradation;Other	rp
FAUX	(2E)-4,6-Dioxo-2-heptenedioate@1.002-rp	(2E)-4,6-Dioxo-2-heptenedioate	184.002	1.002	C7H4O6	21237905	#N/A	rp
FAUX	3-(Sulfooxy)butanoicacid@1.17-rp	3-(Sulfooxy)butanoicacid	184.004	1.17	C4H8O6S	35013967	#N/A	rp
FAUX	Dihydroxybutanone4-phosphate@1.644-rp	Dihydroxybutanone4-phosphate	184.013	1.644	C4H9O6P	#N/A	Metabolic pathways;Biosynthesis of secondary metabolites;Other	rp
FAUX	184.01388@1.126-rp	#N/A	184.014	1.126	C5H9ClO5	#N/A	Metabolic pathways;Biosynthesis of secondary metabolites;Other	rp
FAUX	184.02229@1.349-rp	#N/A	184.022	1.349	C7H9N2PS	#N/A	#N/A	rp
FAUX	5-hydroxyisourate@1.855-rp	5-hydroxyisourate	184.023	1.855	C5H4N4O4	#N/A	Metabolic pathways;Microbial metabolism in diverse environments;Other	rp
FAUX	3,4-dihydroxymandelicacid@1.157-rp	3,4-dihydroxymandelicacid	184.037	1.157	C8H8O5	#N/A	Metabolic pathways;Microbial metabolism in diverse environments;Tyrosine metabolism;Aminobenzoate degradation	rp
FAUX	3,4-dihydroxymandelicacid@2.674-rp	3,4-dihydroxymandelicacid	184.037	2.674	C8H8O5	#N/A	Metabolic pathways;Microbial metabolism in diverse environments;Tyrosine metabolism;Aminobenzoate degradation	rp
FAUX	3,4-dihydroxymandelicacid@6.277-rp	3,4-dihydroxymandelicacid	184.037	6.277	C8H8O5	#N/A	Metabolic pathways;Microbial metabolism in diverse environments;Tyrosine metabolism;Aminobenzoate degradation	rp
FAUX	184.03969@6.597-rp	#N/A	184.04	6.597	C7H9N2O2P	#N/A	#N/A	rp
FAUX	184.04089@2.542-rp	#N/A	184.041	2.542	C7H9N2O2P	#N/A	#N/A	rp
FAUX	Dimethyl4,5-imidazoledicarboxylate@1.121-rp	Dimethyl4,5-imidazoledicarboxylate	184.048	1.121	C7H8N2O4	69266	#N/A	rp
FAUX	Dimethyl4,5-imidazoledicarboxylate@1.518-rp	Dimethyl4,5-imidazoledicarboxylate	184.049	1.518	C7H8N2O4	69266	#N/A	rp
FAUX	2-hydroxy-6-oxo-7-methylocta-2,4-dienoicacid@8.454-rp	2-hydroxy-6-oxo-7-methylocta-2,4-dienoicacid	184.074	8.454	C9H12O4	#N/A	Metabolic pathways;Microbial metabolism in diverse environments;Degradation of aromatic compounds;Phenylalanine metabolism;Tyrosine metabolism;Other	rp
FAUX	2-hydroxy-6-oxo-7-methylocta-2,4-dienoicacid@6.159-rp	2-hydroxy-6-oxo-7-methylocta-2,4-dienoicacid	184.074	6.159	C9H12O4	#N/A	Metabolic pathways;Microbial metabolism in diverse environments;Degradation of aromatic compounds;Phenylalanine metabolism;Tyrosine metabolism;Other	rp
FAUX	2-hydroxy-6-oxo-7-methylocta-2,4-dienoicacid@2.336-rp	2-hydroxy-6-oxo-7-methylocta-2,4-dienoicacid	184.074	2.336	C9H12O4	#N/A	Metabolic pathways;Microbial metabolism in diverse environments;Degradation of aromatic compounds;Phenylalanine metabolism;Tyrosine metabolism;Other	rp
[truncated: 22,841 more rows]

## Sheet: Area
	ileon-694-ATB_89	ileon-691-ATB_86	ileon-688-ATB_83	ileon-686-ATB_81	ileon-692-ATB_87	ileon-690-ATB_85	ileon-669-FMT_64	ileon-678-FMT_73	ileon-682-FMT_77	ileon-683-FMT_78	ileon-670-FMT_65	ileon-666-FMT_61	ileon-674-FMT-AKK_69	ileon-672-FMT-AKK_67	ileon-679-FMT-AKK_74	ileon-680-FMT-AKK_75	ileon-675-FMT-AKK_70	ileon-668-FMT-AKK_63	ileon-671-FMT-AKK-Pas_66	ileon-677-FMT-AKK-Pas_72	ileon-673-FMT-AKK-Pas_68	ileon-676-FMT-AKK-Pas_71	ileon-681-FMT-AKK-Pas_76	ileon-667-FMT-AKK-Pas_62	Bl_matrice-colon_3c	QC_ileon_5e	QC_ileon_5d	QC_ileon_5c	QC_ileon_5b	QC_ileon_5a	Bl_matrice-colon_3b	ileon-695-SPF_90	ileon-693-SPF_88	ileon-687-SPF_82	ileon-689-SPF_84	ileon-685-SPF_80	ileon-684-SPF_79
2-hydroxyvalericacid@2.26-rp	254686	205968	187332	244918	198750	45120.9	386611	2.18326e+06	748111	453485	302822	396206	306388	295860	335676	139623	231516	251427	2.0636e+06	3.0331e+06	510003	1.44936e+06	2.48194e+06	1.72985e+06	183492	705962	400734	536815	419749	705632	236835	830012	483058	227591	253630	653949	597547
Tetralin@7.638-rp	178672	193913	174666	141764	277506	178415	186000	309131	302776	182028	172368	195286	267087	413682	424026	147535	383298	298975	1.06871e+06	1.57282e+06	580809	460938	840022	1.41081e+06	204445	1.81591e+06	1.74874e+06	1.39966e+06	1.73893e+06	1.03301e+06	268474	232542	240797	328159	174003	627147	358431
3-Phenyl-1-propanol@9.903-rp	170443	504125	420756	338693	459360	452354	183280	205193	479203	400942	345153	171437	260387	298619	262595	336816	329810	258959	1.44019e+06	2.0862e+06	1.36453e+06	297691	756724	1.04888e+06	213998	449969	450258	360531	504217	432111	410277	113680	293244	129399	96009.7	91870.7	78080.2
Gabaculine@6.366-rp	72313.7	44491.5	65732.4	56576.9	65570.3	60378.1	101791	331533	48034.4	198864	122108	64546.2	40924.5	42789.1	41134.9	34311.1	45012.2	33282.7	1.45461e+06	1.59687e+06	2.32365e+06	46894.9	1.48479e+06	1.76117e+06	28542.6	1.48196e+06	1.46669e+06	1.48315e+06	1.59251e+06	1.39072e+06	28698.7	74688.7	79788.7	32049.1	1.92758e+06	57828.4	39202
2-Methyl-3-oxocyclopentanecarboxylicacid@1.754-rp	594810	535632	422043	342960	412047	572379	597959	1.26812e+06	475671	952160	586459	573291	355384	529827	147425	521697	400121	523657	2.22948e+06	7.89777e+06	596754	618495	2.24564e+06	3.18625e+06	216338	852107	941146	844142	859264	998026	431361	733525	562756	466890	628282	169684	454861
5-Amino-2,5-dioxopentanoate@6.393-rp	34905.1	23154.9	23195.1	24407.8	28913.4	38045.1	34891.6	47368.1	22095	20587.5	37722.1	30531.1	93997.7	32701.8	35150.4	52343.7	137133	29683.4	234247	397893	169570	26100.7	237154	156097	14865.5	681317	815781	748837	829065	872774	16421.9	48119.9	23631.3	18663.2	122819	25899.1	34126
4-(Chloromethyl)-3-methoxy-5-methyl-1,2-oxazole@6.397-rp	33443.1	22185.1	22223.5	23385.4	27702.4	36451.6	88776.6	98430.9	248089	19725.2	62870.9	28199.5	90060.6	31332.1	33678.1	83302.5	376833	28440.2	3.18487e+06	2.07595e+06	2.88887e+06	25007.4	3.78723e+06	3.5371e+06	14242.9	1.06594e+07	1.14944e+07	1.00227e+07	1.24748e+07	1.33911e+07	16591	75333.4	22641.6	17881.5	2.17392e+06	335024	75597.4
Poly-(3-aminopropylmethylsiloxane)@10.945-rp	194408	126948	212616	241140	229853	242320	439633	826808	1.35391e+06	492772	553807	115373	447654	170469	2.64609e+06	457000	392999	3.63212e+06	1.64822e+07	4.33051e+07	178269	7.40864e+06	2.02276e+07	2.05624e+07	30961.9	6.29502e+06	6.41159e+06	6.3489e+06	6.98154e+06	5.8528e+06	33827.1	280158	432734	367307	2.94671e+06	149544	686719
3-Methylbutylbenzoate@7.649-rp	726117	469685	625400	478742	523233	1.13119e+06	537896	224086	191347	145061	362286	245335	236157	301595	294250	232237	181831	258244	1.98769e+06	3.81394e+06	1.65759e+06	920756	2.04942e+06	1.87902e+06	170795	4.49992e+06	3.86641e+06	3.39974e+06	3.78329e+06	3.14568e+06	197173	430259	649423	203399	308995	1.46013e+06	1.35635e+06
205.07205@9.176-rp	1.50957e+06	1.52329e+06	1.51438e+06	1.11669e+06	974685	1.39906e+06	89188.3	166693	69970.2	290340	1.30591e+06	400568	85326.2	97930.3	62507.2	78190.6	85213.8	56128.9	1.48394e+07	1.052e+07	1.47388e+06	4.84107e+06	1.1321e+07	8.92392e+06	42905.7	2.58153e+06	2.83967e+06	2.40772e+06	1.57962e+06	2.85635e+06	68074	185464	4.53115e+06	116781	636586	1.86593e+06	226489
Acetyleugenol@9.895-rp	1.69855e+06	794271	833732	861082	1.21358e+06	1.41442e+06	582948	1.11938e+06	1.58066e+06	1.6262e+06	1.20677e+06	1.02889e+06	173806	280686	204938	1.5939e+06	743034	115754	4.41583e+06	7.80102e+06	4.42782e+06	1.19393e+06	3.02621e+06	3.3415e+06	96907.3	1.93153e+06	2.14063e+06	1.94262e+06	2.27178e+06	2.05046e+06	72322.9	473256	654536	325801	346195	514516	406147
Dihydrolipoamide@1.124-rp	118578	89449.2	89036.3	100023	98482.5	115240	441948	254332	131494	722730	511183	391624	319877	594835	889510	246463	424736	230142	1.74117e+06	3.28764e+06	270901	1.34626e+06	2.60248e+06	2.3054e+06	8802.26	675587	550676	826159	780594	683317	11316.4	426719	195375	111794	102354	423413	443380
4-Heptyloxyphenol@7.859-rp	1.38425e+06	1.44467e+06	1.00604e+06	942018	986489	1.55665e+06	688769	1.24925e+06	1.31297e+06	301413	998613	496595	472351	495886	251277	385505	252012	375430	4.8745e+06	5.35586e+06	9.29586e+06	3.05737e+06	3.20722e+06	7.16265e+06	89617.1	2.10887e+06	2.17375e+06	2.24805e+06	2.34837e+06	2.23288e+06	145433	348816	699523	216862	462242	1.41754e+06	652727
Gostatin@1.676-rp	2.28225e+06	1.58388e+06	1.90426e+06	1.43225e+06	2.04809e+06	2.4141e+06	1.86027e+06	6.60956e+06	4.59621e+06	3.00915e+06	1.43715e+06	1.45741e+06	601640	2.0077e+06	959346	2.78111e+06	4.22337e+06	812112	8.45193e+06	1.27995e+07	3.7253e+06	6.5682e+06	1.4209e+07	1.36067e+07	148259	3.14763e+06	3.73038e+06	3.18911e+06	3.90201e+06	2.92719e+06	196933	844209	1.33617e+06	322189	466293	622937	709104
214.08195@5.02-rp	47441.5	40450.4	41878.1	38053.6	45360	48530.3	58912.8	271392	45006.5	972150	208952	164384	40186.1	41131.5	35771.9	33635.7	41955.3	36800.6	534535	230541	1.22979e+06	396277	474613	410428	29249.3	188464	222389	219089	214371	208010	30844	51201.6	37737.2	31273.6	34680	34961.7	33410.7
6-(1H-Imidazol-2-ylsulfanyl)-7H-purine@6.396-rp	25164.3	18112.7	18144.1	19092.7	22617.2	29760.3	27293.5	36123.2	17283.5	16104.3	29507.6	23023	73528.5	25580.6	27495.9	40945.2	64661.8	23219.5	213091	437450	86232.9	20416.9	204945	203034	11628.4	419459	500340	406089	603183	560280	12845.8	37641.2	18485.3	14599.1	50978.6	20259.2	26694.6
Sinapicacid@6.454-rp	23999.1	26403.1	50576.3	41299	54405.9	30777.7	68439.2	80400.6	116943	81627	52444.5	53930	36210.8	64478.4	25327.9	23489.6	46477.6	34911	498800	72600.4	455626	58093.6	582110	654505	11853.7	404906	465342	426352	509736	387366	12962.4	43789.6	97443.7	21416.2	49360.1	92837	73655.1
4-(4-Hydroxy-3,5-dimethoxyphenyl)-2-butanone@9.905-rp	2.18701e+06	1.11863e+06	796447	826266	1.33217e+06	1.51494e+06	806055	1.37719e+06	2.25476e+06	2.39574e+06	1.63289e+06	1.27673e+06	221585	235599	226118	2.02251e+06	668809	180745	5.84654e+06	1.04972e+07	6.01771e+06	1.75206e+06	4.12791e+06	4.61272e+06	179993	2.87827e+06	2.96785e+06	2.68586e+06	3.27073e+06	2.84468e+06	248894	738198	682569	368271	431960	682419	513232
(?)-trans-Methyldihydrojasmonate@7.867-rp	288283	141303	139763	111473	174044	246714	63730.3	110346	37754	76107.8	56791.6	47728	237370	196201	126381	112887	112581	155797	725462	907549	1.61804e+06	449077	421137	1.04173e+06	34523.4	143895	160015	127031	122660	140331	41744.5	138114	156632	71990.2	54148.7	51723.3	59726.6
Octenylsuccinicacid@7.958-rp	4.37812e+06	3.28716e+06	3.58082e+06	3.38953e+06	3.79919e+06	4.78506e+06	1.08856e+07	2.11351e+06	1.8699e+06	1.40794e+06	1.23715e+07	1.20031e+06	185265	308766	353322	164515	244116	180837	2.31057e+07	5.23147e+07	1.89984e+07	1.3579e+07	2.87017e+07	3.01975e+07	56944.5	1.82797e+06	1.25356e+06	1.07078e+06	1.25195e+06	1.78576e+06	88287.6	6.62878e+06	2.81333e+06	1.74795e+06	5.5291e+06	5.6242e+06	6.03837e+06
8-(Methylsulfinyl)octylisothiocyanate@1.99-rp	218940	143635	340552	231550	329201	347589	875643	2.47945e+06	818037	512222	230537	314903	1.05917e+06	817682	447221	472742	768732	395234	1.81441e+06	1.75812e+06	1.53616e+06	2.01719e+06	2.38102e+06	1.7573e+06	19444	631547	496007	471488	561851	490146	20639.9	1.39331e+06	331451	250148	373937	378811	457886
JussiaeiineA@3.6-rp	40188.1	35821.4	27838.6	31334.2	34265.8	35695.8	90897.2	194550	293761	47747.1	107435	56699.9	62706.7	32914.7	49955.6	56336	85519.8	42831	1.50165e+06	4.08757e+06	31491.7	466559	1.56788e+06	2.73006e+06	24946.3	295679	230139	239354	305703	243358	22250.8	46853.2	74297.7	23416.9	28502.5	25219.4	56226.7
Equol@9.917-rp	196554	100782	441834	454513	555947	785502	47453.4	101908	56075.9	53813.6	268179	45526.4	57511	66341.5	41847.5	38576.7	378483	38283	9.46182e+06	1.22834e+07	290613	5.70894e+06	8.88426e+06	1.27352e+07	16232.7	1.97404e+06	1.99224e+06	1.83381e+06	2.04807e+06	2.08356e+06	20728.5	73221.2	2.99347e+06	39346.7	282744	1.02284e+06	78304.3
244.99993@6.399-rp	64158.5	45021.3	44305.6	46622	55228.5	72671.2	66647.5	90479.3	48397.6	39324.9	72054.2	56219.5	179548	97200.4	67141.8	99983.4	198777	74610.9	954924	1.63603e+06	627191	49855.7	1.02235e+06	941113	28395.1	3.00595e+06	3.28198e+06	2.79887e+06	3.62186e+06	3.72446e+06	33076.3	91915.3	45139	35649.2	549466	49470.7	65185.2
PerfragilinA@6.385-rp	32262.5	48450.1	20657.6	21660.2	27417.8	35164.8	29988.1	44713.8	20422.2	19028.9	34866.2	28219.7	76648.7	30226	32489.2	48380.8	76404.3	27436.1	1.36822e+06	1.52664e+06	802375	22635.3	1.19546e+06	1.23834e+06	13740.1	2.03413e+06	1.7637e+06	1.8668e+06	2.09496e+06	1.8219e+06	15178.6	44476.8	21842.2	17250.2	1.43569e+06	25425.9	31542.4
250.10579@3.643-rp	38655	41785.1	354637	26478.2	30923.2	47341.7	47995.2	199827	221871	31144.2	188322	108347	26886.4	39363	26677.2	39228.6	31635.6	24455.3	1.01911e+06	842909	121997	762674	915685	298162	20568	223713	247925	216291	207274	169377	21089.5	151267	149474	31362	83043.1	164831	151775
Isoliquiritigenin@9.11-rp	138831	104452	115746	93444.6	77814.4	107402	156995	158463	154267	70390	201595	35575	65324.8	74974.3	37751.1	58495.2	64197.3	40507.6	1.74523e+06	1.93673e+06	307068	2.12958e+06	2.02394e+06	3.03925e+06	16875.1	175004	217916	214168	277207	249486	49066.4	264580	1.07763e+06	210138	605878	814001	770522
Yangonin@10.637-rp	94590.2	71099.3	267165	245832	325667	128121	223034	104840	151633	293872	178210	57509.6	321992	79228.9	88711.8	315596	278455	52511.2	2.22148e+06	4.30468e+06	142981	1.4653e+07	6.10572e+06	8.70879e+06	16603.4	1.14168e+06	1.14289e+06	1.05789e+06	1.30219e+06	1.08728e+06	18614.6	94136.5	262543	298462	215968	160494	325978
O-Demethylangolensin@10.34-rp	95844.4	66517.1	74421.3	67383.1	85761.7	97251.8	242595	186758	256015	204523	213759	297621	382039	523562	185322	484419	319199	382565	1.65359e+06	1.59275e+06	640881	985648	981394	1.49415e+06	17840.9	435618	431362	436733	400793	372677	20259.2	94284.6	377560	352630	142926	274452	113248
263.01074@6.397-rp	100693	83421.9	66912.2	70410.5	83408.4	131545	100654	136646	70155.4	59390.1	108819	84905.1	271161	94337	101400	150999	300201	85629.6	2.37183e+06	4.53947e+06	1.79133e+06	75294.2	2.8119e+06	2.40985e+06	42883.5	8.29915e+06	9.08641e+06	8.13965e+06	9.54749e+06	9.99663e+06	49143.2	138814	68170.8	53838.9	1.5028e+06	121654	98445.4
2,3,4,5,6,7,8,9-Octahydroxynonanal@1.365-rp	8.05414e+06	4.81545e+06	5.26212e+06	1.18691e+06	5.51528e+06	6.3863e+06	2.33257e+07	5.15984e+07	1.60909e+07	6.21073e+07	2.29197e+07	1.24309e+07	3.77024e+07	2.54771e+07	2.93778e+07	4.36124e+07	2.52527e+07	2.35317e+07	1.28443e+08	9.75886e+07	4.24713e+07	1.35347e+08	9.82706e+07	7.24675e+07	238928	3.53534e+07	4.36202e+07	3.33912e+07	3.90671e+07	3.48426e+07	304358	5.61636e+07	2.58453e+07	1.85555e+07	1.93923e+07	6.40966e+07	2.81298e+07
(±)-Naringenin@9.28-rp	256255	206060	325094	223687	603616	280378	64852.2	101898	70244	81127.3	390148	88440.9	97920.8	153238	51921.8	55528	69213.7	44005.5	2.98885e+06	2.30775e+06	292240	828560	2.28e+06	2.10961e+06	27265.7	305806	427056	348273	334358	368578	34048.2	118676	909954	69451.3	93071	190155	136520
273.06772@5.883-rp	97932.4	76872.3	452647	117028	162187	106076	1.33259e+07	2.45746e+06	2.09423e+06	1.34196e+06	1.05979e+06	5.73315e+06	187649	288368	149395	157943	300607	119642	2.99217e+07	6.01051e+07	3.31016e+06	6.64307e+06	1.78697e+07	2.52081e+07	52633.3	5.2841e+06	5.97118e+06	5.1794e+06	5.81707e+06	5.76763e+06	63371.5	789428	1.19301e+06	186258	1.96787e+06	458183	321461
Phloretin@9.457-rp	51789	44766.7	49363.8	43103	57566.1	51279.1	28889.5	55630.2	30927.2	55637.3	51478.8	35642.6	65012.1	71281.4	45219.6	46064.8	74384.9	40915.7	407776	529486	66942.3	574990	610592	511362	15774.9	81279.5	57144.5	110868	69479.1	98948.2	21736.6	52969.5	169000	40300.6	43179.3	183883	43441.8
279.07095@8.997-rp	75675.5	67778.8	69169.3	66540.4	83600.3	90587.3	64611.6	118527	43952.7	52644	940218	51910.1	128981	174822	136420	126690	124056	122265	6.36057e+06	5.81968e+06	110813	2.69977e+06	5.30704e+06	4.40561e+06	25919.4	1.5917e+06	1.30954e+06	1.5042e+06	1.65551e+06	1.52089e+06	28150.2	68252.3	4.51453e+06	55350.6	616942	1.03694e+06	58646.1
N-Coumaroyl-L-asparticacid@8.207-rp	263743	189392	256389	137585	127335	249381	141210	360303	169785	455069	166967	136853	37357.2	40480.4	32030.6	26543.1	50299.4	37201.1	554811	624459	469837	303781	687039	937439	15961.1	234471	218241	256589	241406	270900	17656	296483	129963	59108.8	162934	477350	172055
p-Tolyl-?-D-glucuronicacid@6.55-rp	58227.8	52610.3	83684.1	41889.3	54376.5	63758.9	36719.4	34838.9	97693.3	39280.4	56749	27582.1	62096	50138.6	40967.5	46308.2	85212.3	37783.5	139205	246545	140005	51662.9	141462	150646	19206.1	1.65719e+06	1.64407e+06	1.58572e+06	1.9357e+06	1.63068e+06	21290.4	45496.6	48353	26442.3	73879.9	65323.7	63065.6
2',3'-O-Isopropylideneuridine@6.327-rp	88170.2	47194.2	66490.3	49374.8	61679.9	77522.8	50227.9	71969.3	46833.7	67871.9	79843.9	60325.8	115001	60948.8	55446.8	89467.9	100902	48709.6	2.85028e+06	3.56873e+06	4.18371e+06	47808.3	2.34999e+06	2.5487e+06	29552.4	2.3668e+06	2.678e+06	2.17291e+06	2.49686e+06	2.23602e+06	31914.3	64768.2	38615.1	37511.7	2.61907e+06	48113.6	2.86101e+06
Glycylprolylhydroxyproline@3.217-rp	1.17745e+06	456669	506664	601833	799042	888199	477265	1.76093e+06	662197	705181	724347	373200	278363	1.007e+06	424592	286254	463385	293307	1.83811e+06	3.0727e+06	1.90029e+06	668221	1.40993e+06	2.78159e+06	50367.6	706699	727300	630080	645308	654231	52174.9	699019	219121	633083	452167	374703	365944
Phlorin@2.405-rp	516506	474837	338585	185267	346896	517064	249458	696387	443935	492628	827750	254442	315527	595705	365046	321226	988373	263162	1.20979e+06	1.05176e+06	1.24281e+06	516448	811292	1.16084e+06	20446	553569	378275	392223	507307	484348	21746.8	266191	295310	325348	234787	436827	453445
1,5-Anhydro-1-(2,4,6-trihydroxyphenyl)hexitol@2.182-rp	697426	547013	446723	351429	461087	1.08776e+06	449562	897074	682561	719450	812954	282294	429211	568349	485813	413714	1.14303e+06	398558	1.51042e+06	1.4235e+06	1.8241e+06	707372	1.1823e+06	1.64649e+06	19536.2	567952	459548	463298	520383	542737	21787.2	764836	412651	575263	292069	599556	412201
Methyl2,3,4-tri-O-acetylpentopyranoside@9.038-rp	41779.4	32065.1	32722.9	31479.3	39550.1	42855.5	57476.7	66803.4	30256.2	24905.1	45968.8	22167.2	36373	48337.1	43925.6	39123.1	38764.7	31158.2	135539	1.8519e+06	52423.9	30139.7	440905	387986	12101.5	118311	114250	127647	120027	123261	12914	32289.2	26269.9	26185.5	26335.4	26046.1	27744.6
7-nitrobenzoxadiazole-6-aminohexanoicacid@4.583-rp	54438.5	48201.7	70168.1	51093.8	56601.5	60178.7	28072.1	41465.1	29030.1	37101.8	34635.3	31843.5	27094	28290.6	26331	24826.5	30547.1	27646.5	1.66761e+06	909093	261532	966815	948611	498925	23198.4	93053.4	120656	135740	134866	124324	24837.5	44096.2	29767.1	26271.8	34403.6	69543.2	34581.4
Ac-D-His-Pro@4.492-rp	55311.4	42992.9	246579	52383.5	52768.3	52680.6	26656.9	191559	38295.8	100133	56595.3	27742.1	23604.3	120398	50131.5	21541.8	92554.4	52276.7	1.17056e+06	1.5141e+06	226234	738132	949666	981274	20600.1	120972	149931	108079	83639.3	92863.6	21670	53492.7	30004.9	25038.3	30761	197631	32546.9
1,4,20-pregnatrien-3-one@9.843-rp	400841	395887	206976	514481	754851	395698	223921	342611	377534	651457	471892	137537	93086.5	137946	92253.4	68398.6	723710	62547.9	818918	867693	7.72647e+06	714810	2.99679e+06	3.45599e+06	32623.3	1.50555e+06	1.07923e+06	1.15988e+06	1.22731e+06	1.32383e+06	39924.8	577447	500196	127033	984004	579471	392283
(2E,2'E)-4,4'-(1,2-Phenylenediimino)bis(4-oxo-2-butenoicacid)@6.456-rp	62176.7	53121	51914.7	57287.7	59741.4	70644.2	66654.3	73080.1	49005.7	42379.1	65468.1	51498.5	146302	75022.8	66635.8	73916.5	170499	55549.9	1.94454e+07	1.09782e+07	8.08364e+07	48191.3	1.78914e+07	2.79932e+07	29254.2	3.17895e+07	3.18878e+07	2.88859e+07	3.27572e+07	3.03219e+07	33828.6	80136.7	57269.1	39187.3	1.60806e+07	50947.3	63028.8
305.02134@6.397-rp	87253.7	69666.8	66605.4	67596.7	77217.9	105219	85735.2	282469	74252.4	60665.9	89057.7	69964.4	185827	79284.7	88528.3	109401	208518	71832.6	4.38507e+06	5.40981e+06	3.13044e+06	65373.2	4.36154e+06	3.42247e+06	43157.6	10569596	1.19372e+07	1.0638e+07	1.26662e+07	1.23085e+07	47509.1	95781.9	65376.3	56868.6	2.42457e+06	274983	400141
Z-Gly-Pro@5.885-rp	128468	106878	133268	55959.2	83985.3	119907	45008.7	105035	81148	52674	75693.9	63367	167679	81206.8	97745.5	103675	842757	79451.8	2.38381e+06	4.0392e+06	4.01991e+06	58627.5	2.16095e+06	2.47783e+06	35984	2.57324e+06	2.08855e+06	2.27844e+06	2.71782e+06	2.24184e+06	43381.1	148771	60600.9	49099.8	2.81024e+06	73506.2	113245
307.94329@1.336-rp	102673	105812	100463	96332.1	122252	130761	58004.3	414849	72960.4	1.54194e+06	88847	67033.5	68903.8	83690	139546	54725.3	63915.1	61849.1	684577	660639	263729	351858	1.09996e+06	1.79727e+06	13207.2	112199	182332	140692	226533	167752	14864.5	411692	76582.8	56326.1	65138.7	718827	81973
DELTA-9-CIS-TETRAHYDROCANNABINOL,(-)-@9.825-rp	568637	519681	239670	777412	1.2303e+06	565672	376876	545265	582324	1.07495e+06	759639	182295	211904	317685	528697	378036	803672	185975	1.23332e+06	1.73964e+06	1.19794e+07	1.14315e+06	4.64433e+06	5.41587e+06	50392.7	2.55006e+06	2.02422e+06	1.92627e+06	2.22752e+06	2.06216e+06	44072.3	814591	811175	192606	1.45953e+06	947264	514076
3,7-Dihydroxy-2-(3-hydroxyphenyl)-5-chromanesulfinicacid@9.195-rp	271724	195860	247208	245449	270226	280664	178951	254685	179795	211711	688925	143297	176425	197396	147953	159647	181125	135037	7.4554e+06	7.70473e+06	202551	2.72316e+06	4.61563e+06	6.23289e+06	187739	1.19773e+06	1.43187e+06	1.31176e+06	1.4831e+06	1.27556e+06	260530	227789	4.8416e+06	117911	958693	1.72702e+06	194277
327.05304@6.399-rp	34679.8	23800	23045.3	24250.2	28726.8	37799.5	34666.3	47062.3	25173.7	20454.6	37478.6	29242.3	93390.9	32490.7	34923.4	52005.8	103393	29491.8	1.08031e+06	2.29796e+06	988410	25932.2	1.39545e+06	1.4061e+06	14769.6	4.30005e+06	4.48362e+06	4.06851e+06	5.14617e+06	5.08506e+06	17204.5	47809.2	23478.8	18542.7	900660	79289.8	33905.7
327.09604@5.838-rp	116447	104638	226868	63341.4	65131.9	106037	23747.7	176003	25986.2	81210.4	439898	26794.9	34397.3	35234.7	62448.1	38508.3	45041	28117.9	934702	1.23195e+06	2.17163e+06	767057	901893	1.05934e+06	20089.3	689706	670526	549396	711835	663290	21750.2	56807.8	1.09577e+06	25631	497729	432048	37082.6
Anisatin@6.121-rp	37335.6	46419.1	41067.9	36963.4	35937.2	51475.2	118720	98453.2	130023	128758	136727	27812.2	127702	53427.6	103763	119657	143345	33584.9	450102	1.03313e+06	101899	385125	463614	509704	21028.5	160982	145294	126765	136800	38544.4	23033.8	97819.3	83007.4	63823.7	105094	213140	146390
335.22085@6.258-rp	25232.7	22016.7	20418.4	91479.6	32645.6	27744.4	25270.7	38654.6	18874.1	17837.7	24990.6	23331	63477.3	26853.8	29828.3	56645.2	69926.8	46240.6	2.29874e+07	3.69852e+07	204724	2.96961e+06	9.80147e+06	2.51861e+07	13398.7	1.64075e+06	1.54354e+06	1.46048e+06	1.44933e+06	1.32489e+06	14925.4	167722	18055.2	15722.9	101331	69600.5	18078
1,3,4-Trihydroxy-5-[(3,4,5-trihydroxybenzoyl)oxy]cyclohexanecarboxylicacid@7.413-rp	740001	978357	647465	626969	710348	1.3067e+06	94488.1	147216	83726.1	181606	163209	60678.2	215339	142298	86961	96013.1	233931	102936	3.10418e+06	5.19952e+06	6.83311e+06	3.12529e+06	3.66929e+06	5.40682e+06	34914.1	212722	206637	215899	235922	218861	38672.3	168102	179486	152811	142207	159694	123026
5-formyl-5,6,7,8-tetrahydropteroicacid@6.419-rp	50874.6	46631.7	44007.2	36408.1	41853	65372.8	47645.2	68437.5	45130.7	67091.2	47881.9	42160.6	111014	60788.2	48984.9	52240.4	123975	45070.7	1.60098e+06	1.62385e+06	1.21547e+07	36117	3.00502e+06	1.89906e+06	22742.5	7.66697e+06	8.35791e+06	7.04627e+06	8.39539e+06	8.00339e+06	25729.2	104296	74949.7	81247.2	1.57401e+06	49789.2	78767.1
346.08376@6.358-rp	130139	52717.1	83607	109280	78382.2	113137	78818.6	89064.8	87122	49306.2	64540	55734.7	115697	408411	203269	98622.1	112666	75652.6	2.05925e+06	2.15911e+06	4.47588e+06	47125.5	665175	1.97391e+06	28865.9	2.21818e+06	2.309e+06	1.96635e+06	2.33873e+06	2.10239e+06	31232.9	67175.4	38156.4	54902.3	2.22711e+06	47251.4	45234.9
S-(Formylmethyl)glutathione@6.453-rp	34072	27555.5	26276	27159	31344.4	43419.9	34746.7	113971	29483.1	21201.6	37983.9	30925.9	99174.7	39908.6	39237.2	44489	105443	33911.8	28923.7	114978	1.17808e+06	403246	194357	222642	14785.1	79406.6	108856	75961.5	113117	121935	17919.1	55743.7	35457.3	20031.4	52169.1	29080.8	33335.4
Alanyl-N-[(4-nitrobenzoyl)oxy]prolinamide@6.515-rp	26046.6	23116.6	35625.5	32704.4	40019	32064	28231.2	24185.3	22054.1	22014.7	28113.7	21534.3	48480.4	32732.4	29515.5	32393.3	66528	22975.1	663943	381469	4.71535e+06	20697.6	62434.6	1.44356e+06	14994.8	1.78986e+06	1.75436e+06	1.69396e+06	1.84802e+06	1.71187e+06	16458.2	24334.3	21854.3	19946.2	320092	23521.8	30723.4
2-Amino-3-hydroxy-15-methyl-1-hexadecanesulfonicacid@15.331-rp	26608.3	26664.6	23405.6	25222.4	26575.8	30450.3	43731.3	36260.9	41208.3	42817.1	43422.8	40544.8	31844.7	36430	32850.1	27721	39400	30016.1	135767	722910	27804	82171.6	281332	240055	18085.3	46780.3	48723.4	31104.3	47839.8	34289.2	22642.8	33284.9	63456.1	56486.4	43806.3	42017.2	54681.8
368.16967@6.422-rp	48780.4	32600.8	56181.6	33486	43781	47246.2	35207.8	30583.7	32754.6	27114.1	34487.6	25647.8	58244	180463	34343.6	36951.3	74907	51108.6	1.4649e+06	2.38833e+06	1.24151e+06	25262.1	859183	1.46403e+06	18505.2	1.02186e+06	1.06902e+06	1.01283e+06	1.20683e+06	1.12195e+06	19953.2	30247.1	35197.3	24744.1	526924	27329.2	34698.3
376.11256@3.477-rp	318091	166624	93042.5	101549	172642	392921	46792.4	180814	66802.9	287701	120763	58941.3	251278	162505	286545	26198	115733	148133	1.17325e+06	679793	319092	621018	588857	704386	20305.8	271238	223788	206387	241758	218936	21677.3	166795	65784.1	39276.7	37819.3	289924	43642.1
377.15845@6.656-rp	979336	264973	208588	627032	219569	359541	150722	1.98548e+06	147675	160764	285880	945854	504896	336200	644165	296713	858079	528140	3.89132e+06	6.18269e+06	1.30168e+06	633375	2.51758e+06	3.40447e+06	34663.9	1.77089e+06	2.06415e+06	1.55648e+06	2.12846e+06	2.13203e+06	40854.3	1.50576e+06	133666	111007	983567	1.25312e+06	160745
12-Deoxyaklanonicacid@9.917-rp	187373	96074.3	421196	433282	529978	748811	45236.8	97147.5	53456.6	51299.9	122808	43399.8	54824.6	63242.7	39892.8	36774.8	360803	36494.8	5.92449e+06	7.72454e+06	148489	3.62988e+06	5.39218e+06	8.00214e+06	15474.5	1.23052e+06	1.22021e+06	1.09001e+06	1.19062e+06	1.12609e+06	19760.3	69801	1.54201e+06	37508.8	152198	649185	60038.9
1-O-acetyl-alpha-maltose@1.969-rp	146749	314211	181529	181941	346913	342673	524432	1.844e+06	199707	1.07072e+06	681810	242036	1.03146e+06	791565	913298	1.906e+06	767167	595884	6.79292e+06	7.95084e+06	1.8639e+06	3.81088e+06	4.37959e+06	2.25232e+06	18844.8	1.41963e+06	1.3698e+06	1.14033e+06	1.65348e+06	1.18005e+06	19846.4	1.75878e+06	1.38171e+06	499112	305419	3.24115e+06	192047
1-O-[3-(2,4-Dihydroxy-3-methoxyphenyl)propanoyl]hexopyranuronicacid@6.493-rp	21902.7	22519.9	24367.6	26883	33227.6	29494.3	28090	20541.5	18731.4	18697.9	23823.2	18289.8	39275	23583.1	23187	27512.8	56504.7	18570.4	464378	446656	5.35888e+06	16978.8	1.02138e+06	1.45231e+06	12735.7	1.9765e+06	2.10287e+06	1.83269e+06	2.08421e+06	2.03934e+06	13978.5	45614.7	29307.9	16902.3	277764	19430.3	26094.5
5-(3',4'-Dihydroxyphenyl)-gamma-valerolactone-3'-O-methyl-4'-O-glucuronide@7.384-rp	27345.9	36961.8	42434.2	35140.6	24058.3	28540.3	23317.5	26024.5	22679.9	40812.4	24642	22393.5	46281.8	37466	57012.5	29307.8	79575.6	53988.6	230327	232030	656755	183638	222502	320844	15085.9	190997	37416.6	35113.8	157226	153328	16501.8	26220.9	114499	44121.5	28064.3	27250.2	29550
4-(1H-indol-3-yl)butanoicacid[2-(4-amino-1,3-dimethyl-2,6-dioxo-5-pyrimidinyl)-2-oxoethyl]ester@8.605-rp	172129	159382	118866	132639	118361	216392	32554.1	42799.1	37156.3	42100.8	80167.9	31143.4	30533.3	73098.3	55613.9	43090.5	70313.4	33111.4	1.00835e+06	973931	1.25325e+06	576419	888797	1.16223e+06	14736.7	361297	330560	338231	380290	357990	16465.9	45329.8	2.76305e+06	28533.7	71084.2	452310	42707.3
ReserpicAcid@10.333-rp	107406	74541.1	83398.9	75511.6	96107.2	108983	76388.1	150620	84317.9	98567.9	92147	69186.9	428125	107527	62679.5	60193.4	357704	70871.3	2.15529e+06	2.17564e+06	85520.7	1.85615e+06	1.70261e+06	1.12653e+06	19993.1	275636	200715	145202	211338	177361	22703.1	131489	462920	395168	83958.9	93995.3	95332.5
404.09575@6.435-rp	28588.6	26190.7	26338.8	22613.2	27723.6	34846.1	28285.1	24570.2	20763	21782.8	27706.5	20604.8	45414.6	24037.7	27590.8	28791.7	58291	21359.5	177052	22325.1	1.68424e+06	20295	175682	279647	14866.6	631091	591809	549473	679401	546745	16029.9	24299.8	21702.4	19878.8	87543.4	21925.8	27875.8
406.15974@5.786-rp	19723.8	18765.7	19686.8	16927.5	18423.8	21333.8	25493.4	18946.6	16224	273449	72103.3	16322.8	61658.5	67323.5	63177.6	32487.3	18970.8	47083.5	277986	415531	229039	361664	375316	685758	12542.4	111163	135382	112492	113554	107061	13579.3	29784.2	44940.9	50374.1	21085.7	45161	17298.6
Khelloside@9.273-rp	364176	465772	654029	289320	227909	447838	57261.6	30359.6	32635.5	34070.7	71397.2	23798	218825	290513	152093	265813	338314	137522	3.67241e+06	4.73542e+06	7.34623e+06	2.76136e+06	3.94943e+06	5.27385e+06	26261	2.34047e+06	2.55087e+06	2.45854e+06	2.60866e+06	2.32242e+06	55012.8	84461.6	2.69718e+06	81607.7	198257	401459	189067
PatientosideA@6.425-rp	66816.1	51451.4	1.34506e+06	50893.6	61191	2.23182e+06	68857.8	80147.4	50667.3	45941.1	368459	56244.5	157150	66114.4	68496.9	90147.9	179942	59922.1	9.55689e+06	2.1029e+07	8.07074e+06	1.99868e+06	1.18372e+07	1.2348e+07	31725.2	6.2871e+06	6.69709e+06	5.92459e+06	7.38844e+06	6.97248e+06	36094.1	80782.8	56408.2	40949.5	6.70855e+06	278724	459102
(3R)-3-[(3R,5S)-7-Oxo-4-oxa-1-azabicyclo[3.2.0]hept-3-yl]seryl-(3S)-3-[(3R,5S)-7-oxo-4-oxa-1-azabicyclo[3.2.0]hept-3-yl]serine@1.629-rp	656434	276299	1.10192e+06	353144	336415	237223	518212	806856	480673	5.50641e+06	1.693e+06	205066	1.78219e+06	7.81791e+06	314640	2.18987e+06	399013	4.24035e+06	1.23403e+07	1.82271e+07	9.4795e+06	1.1822e+07	8.56187e+06	8.89206e+06	88541.2	5.32896e+06	5.84956e+06	5.49619e+06	5.61087e+06	5.33366e+06	118497	4.31477e+06	659806	1.62207e+06	405416	5.57268e+06	151880
N-Acetyl-6-(benzyloxy)-9-(beta-D-ribofuranosyl)-9H-purin-2-amine@6.497-rp	60738.8	50279.5	71167.8	69110.8	89733.9	65842.2	64769.6	74048.8	41892.1	51591.7	127147	46368.1	136387	62856.2	61799.4	71323.9	157500	50615.5	3.60838e+06	3.96276e+06	2.57608e+06	47855.8	2.44887e+06	3.15123e+06	27155.1	2.67274e+06	2.7119e+06	2.47224e+06	2.6262e+06	2.45941e+06	31696.9	76737.2	57900.2	36956.8	1.39874e+06	59811.3	60485.1
418.11168@6.487-rp	23574.4	24238.7	26227.4	63674.7	31853.3	31745.4	30233.9	22109.3	20161	20159.3	25641.5	19685.8	42272.6	25383.1	24956.7	29612.7	60817.4	19987.7	125558	109480	1.31834e+06	18274.7	265592	385197	13707.7	529948	533552	485727	551330	500548	15045.4	21660.5	20084.8	18192.4	57292.1	20913.3	28086.1
AloinB@9.844-rp	302268	207613	235909	147228	173018	218075	179261	364991	273652	322406	1.03477e+06	114290	105685	114993	69414.8	78903.1	5.93796e+06	72106.3	2.66361e+07	4.01283e+07	3.26519e+06	1.34844e+07	1.92481e+07	3.96854e+07	40376	2.09664e+07	2.02038e+07	1.92878e+07	2.11243e+07	2.18277e+07	47876.6	214570	3.62692e+07	81079.8	2.94391e+06	2.30519e+06	172941
AloinA@9.92-rp	686677	484002	1.7794e+06	1.56081e+06	1.91422e+06	2.60908e+06	299948	777115	475221	471579	3.01829e+06	287486	219431	270474	198626	155135	1.28733e+07	197509	8.85394e+07	1.33564e+08	3.50822e+06	6.24895e+07	8.64185e+07	1.27538e+08	71973.5	2.12362e+07	2.04124e+07	1.94645e+07	2.13421e+07	2.20278e+07	89106.1	691645	4.06117e+07	179582	3.32936e+06	8.31096e+06	482047
Liquiritin@9.741-rp	61328.6	57076.5	133191	53575.2	105295	83316.1	358287	570204	637715	223692	858497	221250	184910	92624.6	71392.7	110439	6.66795e+06	84677.4	1.42383e+07	2.24586e+07	856974	9.53247e+06	1.35379e+07	2.23704e+07	16127.1	3.60774e+06	3.83337e+06	3.36547e+06	3.89811e+06	3.86337e+06	17714.5	118408	1.59673e+06	39275.3	611978	1.61801e+06	88649.9
418.18455@4.939-rp	218282	127199	188601	139009	132565	199672	72998.1	103454	74016.4	78583.5	576830	74796.7	217561	277084	224736	150447	369750	181418	864672	785642	3.0804e+06	678406	489098	808490	64480.8	538386	571177	546303	586207	472668	68175.1	79968.5	1.7849e+06	70677.6	317870	473634	75843.9
4-(1-Carboxyethyl)-3-hydroxy-2-(3-methyl-2-buten-1-yl)phenylhexopyranosiduronicacid@9.462-rp	151545	129622	74213.2	77744.1	92002.9	323362	22370.7	50596	23810.3	30874.8	294195	34943.4	44463.6	44804.6	30312.8	24589.6	53327.1	32016.7	773145	525540	996825	533380	290444	610608	15766.7	442284	331231	340131	439016	354855	17034.5	26338.7	490025	25441.1	170650	269215	26680.6
Prunin@7.591-rp	48831.8	36465.1	42556.1	31151.4	39752	47889.8	28596.5	32107.8	36653.6	30614.3	42692.3	26409.8	46353.7	58648	68638.1	48884	77043.2	42583.1	586850	851454	54960.7	444402	490265	609881	18265.9	123563	154411	108162	137612	147468	19704	39816.9	379160	50678.4	49755.5	127725	46251.2
Naringenin-7-glucoside@7.857-rp	47205	33434.3	47778.4	36199.6	40989.6	43597	110697	34686.2	40068.7	26780.7	35045.1	33985.2	67737.7	177849	251050	65514.3	120332	51937.8	1.09717e+06	1.86565e+06	141113	732112	1.02098e+06	1.16231e+06	16507.8	357039	327756	295064	321805	299139	18454.8	40324.4	441820	23923.5	35432.8	57224.9	39164.8
434.17866@2.501-rp	46357.6	43368.6	30973.1	32341.3	55046.2	45061	85010.4	57533.4	42886.3	56944.7	37062.2	35326	104813	81036.9	38683.9	70891.8	62207.1	58950.3	1.31476e+06	1.4871e+06	42239.7	285457	902637	552492	21107.8	133018	132771	125918	157902	99329	22546.9	84120	156208	46377.4	53820.9	40691.6	48892.6
1,3-dimethyl-8-(3-methyl-1-piperidinyl)-7-[2-[(5-methyl-1,3,4-thiadiazol-2-yl)thio]ethyl]purine-2,6-dione@9.933-rp	177594	91060.1	399213	449095	502318	709729	44315.8	97658.5	51046.6	51270.4	141847	45833.5	52958.5	59942	37810.7	34855.5	368127	36429.6	8.55897e+06	8.72863e+06	165001	5.72438e+06	9.28313e+06	1.15829e+07	14666.8	1.91381e+06	1.81966e+06	1.51382e+06	1.81002e+06	1.97146e+06	17550.6	71045.4	2.10945e+06	35551.2	333555	815367	70750.7
Swertianolin@1.163-rp	3.64571e+06	1.61612e+06	2.0752e+06	1.43878e+06	2.74689e+06	2.85311e+06	910187	1.05728e+06	639934	3.68857e+06	3.21362e+06	1.00751e+06	3.80175e+06	2.88363e+06	3.49321e+06	3.74443e+06	1.35121e+06	2.73685e+06	1.38524e+07	3.50811e+06	4.52078e+06	6.19983e+06	7.99386e+06	9.15205e+06	41782.5	2.96069e+06	2.89905e+06	2.67248e+06	3.18896e+06	2.46814e+06	43949.9	2.13353e+06	2.57818e+06	1.09113e+06	1.72463e+06	2.1593e+06	1.88574e+06
Quercitrin@9.279-rp	2.27441e+06	2.54533e+06	3.81843e+06	2.31235e+06	2.13637e+06	2.68166e+06	163367	467293	105307	356537	3.55529e+06	502856	121166	146545	86501.7	78145.4	141322	1.23631e+06	5.31411e+07	4.16087e+07	4.97757e+06	1.87061e+07	4.06788e+07	3.44911e+07	54824.1	9.35638e+06	1.01695e+07	8.76231e+06	8.21689e+06	9.84538e+06	65714	382495	2.25456e+07	203681	1.98194e+06	6.33975e+06	363981
Neoastilbin@9.01-rp	69524.2	49686.6	51982.8	49546.1	62709.7	73980.3	77456.1	387191	114806	440533	763491	51793.6	118678	70396.9	66602.5	70841.4	87797.7	54235.3	797418	1.13786e+06	66135.6	2.10697e+06	1.16334e+06	2.01199e+06	18795.7	310989	286572	282313	268504	292188	22296.5	91759.2	238716	52494.4	125990	79515.4	63341.7
Lysidinemonophosphate@10.64-rp	87534.4	62514.7	236932	218013	288814	147789	156403	92975.8	70261.6	260617	82863.1	51001.7	281257	70263.2	78673	279882	246945	46568.9	414451	657054	70337.9	3.44173e+06	1.31078e+06	2.00744e+06	14724.5	138753	182770	165888	202926	183256	16508.1	83483.8	232833	264687	67954.3	73532.8	289090
452.05305@6.4-rp	82984.6	65070.8	63384.9	64098.6	75476.1	101702	79960.5	100865	60301.8	57499.8	89638.3	70219	202259	80042.6	88222.3	116042	221847	72566	2.40155e+06	4.68338e+06	1.35992e+06	65269	2.55808e+06	1.91499e+06	39774.8	5.33617e+06	5.72859e+06	5.43112e+06	5.92179e+06	6.15854e+06	44668.6	103973	63185.2	53363.8	680238	67031.5	82844.6
462.14225@4.725-rp	525165	405587	456660	391896	321074	599404	259407	2.98006e+06	252964	312765	208859	166510	97213.8	135584	84331.3	81920.5	148590	90930.5	552587	1.56374e+06	1.6659e+07	4.72405e+06	1.8434e+06	2.92819e+06	76266	3.86609e+06	3.83644e+06	3.45902e+06	3.83489e+06	3.60545e+06	89287.5	106055	117113	88630.3	85256.4	102714	360941
463.01066@6.391-rp	25941	22778.2	21928.5	21486.7	24000.5	33417.4	20587.9	23515.6	20358.9	19978.9	25371.7	19459.2	44873.4	23052.2	26459.6	27998.9	48084.7	20856.3	305740	675893	191276	19462.9	481458	335428	14097.1	767717	994041	779239	982798	783421	15016.1	23303.5	20767.5	19063.8	127008	21055.5	23530.3
465.12669@9.727-rp	83955.6	56451.6	103610	108687	118809	213612	41884.8	75339.3	48963.7	57013.8	207405	43660.2	58346	67731.5	41238.1	37583.1	310283	41896.4	2.5804e+06	1.14676e+06	77378.3	773135	1.54023e+06	1.05801e+06	18480.3	291784	250312	204562	239537	287416	26440.2	71270.4	576451	38488	143510	245246	58607
470.06381@6.395-rp	24343.7	17522	17552.4	17037.4	21879.6	28789.8	26403.4	34945.1	16719.9	15579.2	28545.4	22272.2	62753.2	24746.4	26599.3	39610	62553.1	22462.3	713568	1.40299e+06	382414	18531.8	487044	622852	11249.2	1.41217e+06	1.12024e+06	1.12778e+06	1.18534e+06	1.40306e+06	12426.9	36413.7	17882.5	14123	142696	19598.6	25824.1
470.21598@9.102-rp	314123	368513	201634	187934	253056	452173	151325	1.19934e+06	2.43272e+06	163252	165895	1.11696e+06	180112	591599	4.71314e+06	144442	152919	614037	4.96839e+06	4.10326e+06	1.7512e+07	8.20477e+06	5.20347e+06	4.82814e+06	47709	6.57882e+06	7.33665e+06	5.94222e+06	7.80637e+06	6.7292e+06	75902.9	837559	308929	111874	1.35219e+06	1.66046e+06	162842
474.15294@9.164-rp	75960	118308	156719	120697	91188.4	98571.6	22930.9	34413.5	25534.7	30489.2	29802.5	26352.8	26456.5	37758.4	29372.3	24628.5	31071.5	26517.8	206623	261184	725841	166157	268788	250154	50287.2	171970	108630	149456	170807	122702	75330	28438.9	108625	22995.5	25636.5	37943.6	27390.4
3-alpha-AcetoxymaoesinA,(rel)-@9.363-rp	167539	158875	139021	158032	173747	166106	143084	165673	154623	148276	160214	177130	54431.4	61771.1	41051.3	34855.9	97354.5	40518.7	4.96333e+06	5.23062e+06	238034	1.95013e+06	6.84513e+06	5.07236e+06	23724.5	1.2904e+06	1215093	1.15272e+06	1.3079e+06	1.36509e+06	26925.8	157411	3.06231e+06	130328	120681	176778	157497
BlestriareneB@10.334-rp	108907	103703	63787.7	54990.8	65154	110812	159133	159418	105748	556865	134835	84810.6	8.05177e+06	247467	80177.7	147345	6.84175e+06	107619	1.45744e+07	1.65267e+07	376548	1.39989e+07	1.11037e+07	8.96798e+06	20810.6	2.27097e+06	2.36358e+06	2.3076e+06	2.49422e+06	2.3698e+06	22789.5	85220.6	7.67169e+06	7.42482e+06	282417	94210.3	152380
486.19675@6.308-rp	121971	54327.7	31991.2	30253	43317.8	40319.4	32172.7	23855.7	26781.5	20803.3	28055.2	20171.5	40208.6	22232.4	30090.3	34980.6	39163.6	20817.8	287010	49162.3	2.73269e+06	320825	267712	386011	14908.6	813273	867160	824298	867756	903726	15510.3	30203.9	65996.9	20834.7	144254	129277	402334
L-Phenylalanyl-L-seryl-L-tyrosyl-L-alanine@8.508-rp	341122	532933	359634	728466	1.19994e+06	510211	132727	360456	167937	140735	102008	987350	75713.3	192185	106342	196362	130300	93859.7	3.04384e+06	2.23727e+06	5.82001e+06	4.30852e+06	2.86612e+06	3.10572e+06	28243.4	113409	547106	467062	150230	537577	30575.2	179500	189951	85844.9	133363	197006	129489
488.22669@8.379-rp	438602	316949	406320	366009	292249	559595	189794	1.5894e+06	240040	248656	712746	2.0559e+06	1.37504e+06	191029	119424	338487	176418	110126	4.94302e+06	1.48925e+06	1.65577e+06	3.35632e+06	2.75454e+06	2.92095e+06	35202.9	1.47088e+06	1.49551e+06	1.44533e+06	1.56137e+06	1.45858e+06	39618.6	384782	325337	184329	1.61579e+06	1.85084e+06	297589
490.0973@9.134-rp	68737.5	50776.9	70273.1	66595.7	69717.3	70524.3	32634.2	40268.8	34022.7	35178	37417.6	34385.9	33886.3	56767.2	34369.8	30019.7	95138.4	35073.1	1.02758e+06	989971	896897	685078	901150	1.09471e+06	36361.5	350152	328932	321994	395837	353148	59068.4	33277.6	968751	26908	29998.4	64029.3	32050.7
490.24012@6.398-rp	492975	475592	445055	533368	914857	1.2952e+06	199619	974896	532277	315567	367199	236301	522160	1.07555e+06	214629	453917	513117	939027	423340	2.04609e+07	2.57827e+06	3.13795e+07	2.27211e+07	2.79119e+06	94894.3	1.00847e+06	649439	647652	609213	674912	105282	7.41899e+06	328726	134857	586053	5.44081e+06	281957
1a-(Hydroxymethyl)-6-methoxy-1a,1b,2,5a,6,6a-hexahydrooxireno[4,5]cyclopenta[1,2-c]pyran-2-yl6-O-pentopyranosylhexopyranoside@6.401-rp	63207.5	103095	46359.8	71337.2	73560.2	83936.7	62432.8	107832	47400.9	92996.3	66541.3	77551.4	145384	57974	63985.8	83565.7	162364	56613.7	1.48942e+06	1.25439e+06	3.56493e+06	61987.8	1.58792e+06	1.73686e+06	29949.5	1.72867e+06	1.89656e+06	1.47202e+06	1.90097e+06	1.65191e+06	33725.1	74755.6	47702.5	65244	1.23615e+06	172847	59976.3
512.07482@6.402-rp	17218.3	15119	14227.2	13643.9	15930.3	22180.8	13548	15397.6	13513.2	13261	16840.4	12916	29784.7	15300.9	17562.5	18327	31916.2	13843.4	758892	1.13823e+06	414401	12918.5	752416	534710	9356.93	1.15447e+06	1.27198e+06	1.31698e+06	1.19313e+06	1.3039e+06	9966.96	15467.7	13784.4	12653.6	191136	13975.6	15618.2
1,5-Anhydro-1-[3-(3,4-dihydroxybenzoyl)-2,4,6-trihydroxyphenyl]-6-O-(4-hydroxybenzoyl)hexitol@9.642-rp	187458	188339	263628	270666	301199	402210	84185.9	109780	91245.9	100266	121885	86678.1	107539	139940	100869	93963.7	1.52e+07	95330.3	7.11279e+07	4.10394e+07	212797	2.29595e+07	4.07235e+07	3.7022e+07	42771	8.95324e+06	9.14668e+06	8.28381e+06	9.35236e+06	8.20498e+06	47763.3	130083	213395	74693	526591	82900.9	82790.8
558.14166@9.054-rp	162023	124654	124627	124928	147060	164141	113657	171821	112138	106702	1.14014e+06	105766	135247	179733	163329	145472	144140	127218	8.40108e+06	7.62164e+06	194929	3.48899e+06	7.0913e+06	5.92271e+06	45044.1	1.88944e+06	1.50796e+06	1.78981e+06	1.96043e+06	1.77183e+06	49518.5	120061	5.76218e+06	97366.2	787085	1.27896e+06	103163
{5-[(3-Acetylphenyl)amino]-4-amino-3-[(dimethylcarbamoyl)amino]-1,2-dihydroxy-3-(1-hydroxyethyl)-2-methylcyclopentyl}methyl2-hydroxy-6-methylbenzoate@9.158-rp	139814	114868	82023.7	62071	179198	75415.6	115944	109005	199155	154402	109857	90944.6	31584	41180.8	34091.4	27980.1	71136.4	28921.3	591641	649654	1.89781e+06	347482	793990	909733	54845.2	519794	84234.3	495467	579185	508200	82157.9	322668	191621	58855.1	334696	199685	166877
560.11408@9.414-rp	313090	296899	259796	295323	324692	310412	267390	309602	288953	277093	299402	331014	128721	170181	99398.6	93946.4	181932	105774	1.66888e+07	8.93904e+06	485249	7.94903e+06	7.42972e+06	6.00398e+06	45644.2	1.80846e+06	1.87319e+06	2.05346e+06	2.22904e+06	2.52884e+06	50317.9	294164	269318	243551	225524	330355	294324
560.12143@9.073-rp	89669.3	64456.2	62130.1	71133.2	71831.4	88235.8	55515.9	55912.8	54773.7	52118.6	70517.9	51661.5	66061.3	82595.5	79778.3	71056	59684.7	56589.9	151998	774705	1.02364e+06	460110	391633	717251	22001.8	135393	186425	132464	161256	179220	23771.7	58644.1	162710	47558.6	47830.8	57393.1	50390.1
asn-asn-gln-trp@9.154-rp	208884	115509	131260	137792	160163	170783	137869	201945	108162	169999	134797	99346.4	131899	151383	96625.1	120869	131726	86765.4	1.44322e+07	1.16532e+07	165382	4.43371e+06	9.37728e+06	1.1571e+07	66324.7	1.76713e+06	2.10951e+06	1.53427e+06	2.30889e+06	1.7458e+06	105230	194914	340903	96963.5	113866	297921	155261
560.23694@9.398-rp	219565	183631	188182	165700	214186	226084	159277	335926	208259	281650	222223	234632	173596	178589	103333	100219	210142	108854	3.07614e+07	3.8705e+07	362572	1.01185e+07	2.29813e+07	3.1687e+07	45939.2	5.51882e+06	5.76593e+06	4.98475e+06	6.30391e+06	5.77189e+06	55368.5	239116	280144	128266	477641	218214	183655
576.10941@9.112-rp	229774	169736	234908	222615	233050	235747	1.20908e+07	134610	515309	371476	263938	118690	537232	8.65197e+06	390077	472914	400947	447785	4.24957e+06	4.86128e+06	2.05869e+07	5.41394e+06	2.51422e+06	1.8446e+06	225850	8.13566e+06	9.85091e+06	7.96618e+06	9.93899e+06	1.03512e+07	294656	134733	125904	109264	192028	120154	351675
Eriocitrin@8.961-rp	102857	38435.3	38094.5	45701.3	51366.6	67684.5	27673.7	75253	28395.3	33347.6	165525	34909.5	109009	117567	91742.2	85198.6	83427.7	103209	176689	388884	41376	1.60038e+06	510727	1.01564e+06	17430.8	48444.3	153518	151762	54548.1	201947	22406.3	33965.4	60953.8	26550.4	40860.2	38899.4	30185.8
630.33873@12.616-rp	286320	265116	216130	289378	213894	267213	251732	262141	262201	260013	690392	138190	271071	265237	276151	271273	286851	279527	3.89749e+06	3.4684e+06	270664	2.43654e+06	4.09656e+06	4.22288e+06	46591.6	1.18807e+06	1.0799e+06	1.07552e+06	1.24114e+06	1.38083e+06	50715.8	275720	704046	220326	2.60173e+06	930951	250163
630.33892@12.86-rp	133118	124673	98926.8	105967	81305.2	84792.3	126341	103367	133995	119604	406638	81760	108672	77636.5	96846.2	117451	100652	103060	3.07848e+06	3.15534e+06	129114	4.2631e+06	2.06748e+06	2.43497e+06	40993.4	1.00803e+06	1.08106e+06	706985	948050	843047	44541.5	121560	224372	112593	3.08068e+06	765503	190845
630.34108@15.683-rp	50053.1	48585.6	69838	86168.6	43315.2	48492.4	974923	4.45708e+06	1.03142e+06	1.63386e+06	1.24789e+07	1.0752e+06	46047.2	70822.7	88659.1	124465	236236	61515.5	1.64424e+07	3.91078e+07	1.09687e+06	2.50654e+07	1.29276e+07	3.82311e+07	26987.3	7.19882e+06	7.12447e+06	7.1408e+06	6.55547e+06	5.28248e+06	31570.5	3.23609e+06	3.39352e+06	366435	7.20021e+06	9.41732e+06	1.27535e+06
Plantamajoside@9.129-rp	293400	274466	220817	249400	288590	609479	96930.5	110096	122838	97934.3	108713	97075.4	114826	203272	136068	115588	137644	109644	7.2801e+07	6.51861e+07	484044	2.33702e+07	4.36742e+07	5.87417e+07	99413	9.19949e+06	1.08692e+07	9.84756e+06	1.15247e+07	1.04284e+07	161494	139825	98120.3	73566.9	830856	88460.1	103560
N-Acetyl-O-phosphono-L-tyrosyl-L-leucyl-L-prolyl-L-glutamine@6.453-rp	79055.8	66192.1	60439.9	63873	74749.6	87797.5	82627.9	99821.7	58995.8	52128.2	85071.4	67828.2	202328	80671.4	80091.2	97442.1	220267	73469.5	2.33923e+06	2.15064e+07	2.26278e+06	60213.7	9.96418e+06	1.68039e+06	36114	1.3556e+07	1.30928e+07	1.13327e+07	1.35642e+07	1.25264e+07	42474.9	112164	76354.2	48426	6.717e+06	65564	77276.9
641.37016@9.386-rp	68670.8	55034.7	51414.2	44303.6	57730.1	80916.6	215064	130182	167579	115067	66807.5	56492.1	57634.3	52799.4	32742	32976.4	62745.8	31061.9	521897	955351	377420	493690	366563	775903	13120.6	380116	325072	362654	363331	413330	16179.5	77571.8	98255.7	68990.7	80661.3	61036.6	61997.6
Hellicoside@8.898-rp	167305	165285	203379	318260	295490	228558	181142	131631	135677	105069	242944	132061	876380	2.43112e+06	297450	259790	1.51001e+06	1.07964e+06	6.25416e+06	5.40759e+06	280616	3.38147e+06	3.9583e+06	4.29025e+06	78282.7	916442	1.16657e+06	817041	889348	874351	102091	137075	216470	83258.5	276338	169933	138509
659.10615@6.398-rp	44243.5	31845.4	31900.6	32342.8	39765.2	52324.2	47987	63511.2	30387.6	28314.4	51879.9	40478.7	122110	44975.4	48342.9	71989.3	113687	40824.2	813874	1.68743e+06	148521	34762.9	742877	491444	19888.3	1.18926e+06	1.35466e+06	1.16095e+06	1.46414e+06	1.34435e+06	22585.3	66180.2	32500.6	25667.9	147776	35619.5	46934.1
662.17615@9.151-rp	86453	63863.4	88384.3	83759.2	87685.2	88700.2	41044.9	50647.1	42791.2	44871.5	47061.1	38783.9	42619.7	71397.5	43227.8	37756.6	45728.5	39026.7	2.21134e+06	1.47315e+06	79414.5	553607	1.08534e+06	1.52737e+06	74008.6	157426	169239	166707	203309	134170	110865	41854.1	45218.2	33842.9	37729.7	40694.1	40311
Veratridine@5.793-rp	23558.9	20699.1	21715.2	19269.8	20322	23531.8	306968	20898.7	137970	687498	289642	56622.5	583148	45463.8	69686.9	53020.1	19788.2	22470.4	672890	1.06595e+06	403278	811597	841489	1.65439e+06	13834.7	289362	268378	245264	254675	30009.5	14978.4	214675	17552.1	17651	78799.8	94337.9	101699
N-acetyl-4-(N-acetylglucosaminyl)muramoyl-L-alanyl-D-isoglutamine@3.191-rp	62410.5	82319.2	36606.9	39999.6	37948.7	59908.8	311898	304509	163948	302581	97872	63377.2	394836	233436	216662	313259	135874	145235	615179	776344	426913	611338	673296	1.23854e+06	22785.2	242828	216646	224395	249603	244691	23722.5	557389	368136	87602	84523.6	74960.6	85392.4
5-(1-{[3-Acetamido-4,5-dihydroxy-6-(hydroxymethyl)tetrahydro-2H-pyran-2-yl]oxy}-2,3-dihydroxypropyl)-13-carbamoyl-4-formyl-7,10-dimethyl-2,8,11-trioxo-6-oxa-3,9,12-triazahexadecan-16-oicacid(non-pre ferredname)@4.586-rp	52547.8	49486.3	72038.1	52455.5	58110	61782.6	736058	29923.4	29803.8	737220	211892	32692.1	27816	29044.6	27032.7	25488.1	31361.2	28383.3	1.04274e+06	1.19149e+06	667636	840399	1.25452e+06	2.08897e+06	23816.7	493025	464303	430578	498838	431239	25499.4	32544.2	1.0501e+06	203937	35320.5	29933.1	55704.2
708.34429@6.301-rp	34273.8	24940.8	42367.4	25452.7	35814	52638.8	28865.7	55146.6	26802.1	214800	75172.1	228195	87335.3	52617	35568.8	71308.8	217747	33013	9.29903e+06	2.2386e+06	1.92555e+07	32768	5.32866e+06	1.34299e+07	17376.2	1.33002e+06	1.14487e+06	1.14941e+06	1.14601e+06	1.16468e+06	19226.4	132300	22966.5	20128.1	456692	30052.1	433952
737.29799@6.292-rp	39934.9	21777.9	24938.5	24496.8	25916.5	39162.6	336403	130244	202155	19965	23651.2	29697.2	38763.4	21727.7	25102.4	36630.8	36930.3	20220.6	666190	753484	400663	554111	651757	1.2255e+06	14294	221205	237752	181426	224409	204639	14608.6	20626.5	600807	145527	31566.6	106003	52239.8
N-acetyl-D-glucosaminyl-(1->4)-N-acetylmuramoyl-L-alanyl-D-glutamyl-6-carboxy-L-lysine@2.503-rp	42353.9	39623	28298.1	29548.1	50292.1	41169.3	85010.4	52564.5	39182.4	52026.6	34060.6	32275	95760.4	74038.1	35343	64769.2	62207.1	53859	1.28502e+06	1.51813e+06	38591.7	326116	902637	552492	19284.8	133018	132771	125918	155867	128432	20599.6	76855	156208	41748.8	49172.6	37177.3	44670
876.41905@5.786-rp	23930.1	22133.2	21755.6	26788.2	29856.7	31644.6	151626	36134	26275.6	280089	99701.2	29443.1	46828	31360.9	49811.6	40924.5	29086.9	46238.4	288441	457324	216857	312203	345574	704111	15655.2	115548	99252.2	95611	150526	110613	19405.3	38376.7	19165.5	31392.5	26344.2	47144	30369.5
910.36618@5.225-rp	114906	109260	128715	114029	252624	280620	105419	64012.5	80956	82973.6	236059	112998	562079	510611	367341	140205	49128.6	288680	2.53518e+06	3.05543e+06	139882	494002	1.85031e+06	1.02673e+06	41706.2	347329	318924	299096	372199	381498	48479.4	85040.3	346329	258013	63549.7	137990	88611.8
1008.46132@5.534-rp	19572.7	19823	23605.3	23941.5	31267.1	32019.9	472670	32122.4	45869.9	745226	202658	26627.6	47807.4	29302.4	23612.9	24025.8	21629.9	36703.4	960487	667031	254773	519040	723880	874778	16225.8	254104	208310	205336	243826	239029	20882.3	22874.4	214146	139235	23122.2	27782.9	17992.3
1061.48778@5.226-rp	29944.5	23448.4	29670	33696.7	42227	42566.9	1.61211e+06	160781	262543	1.67916e+06	865373	39581.2	961620	41157.3	283218	123308	827970	269616	1.56656e+06	2.67119e+06	1.45542e+06	1.8603e+06	2.22885e+06	4.25002e+06	22266.4	810040	778498	833947	871558	831060	27947.8	158835	72306.6	39298.8	122587	222727	221481
1061.48778@5.793-rp	27443.2	25382.5	26201.6	30720.9	34239.9	35195.6	332852	54695	111540	526792	342948	33765.6	53702.8	35965	57124.3	70685.2	33357.1	46131	823307	1.51499e+06	589119	679233	920301	1.84356e+06	17953.5	269107	303701	322742	350199	407455	22254.1	61990.6	238786	441352	37231.8	79225.8	122604
1079.49871@5.795-rp	97739.9	88173.8	90567.6	94912.2	103426	111708	5.47557e+06	1.96055e+06	1.80757e+06	1.04162e+07	4.9651e+06	1.01843e+06	142477	157876	214804	158056	100739	129322	8.82642e+06	1.40305e+07	6.96523e+06	9.90802e+06	1.20923e+07	2.11603e+07	60720.9	4.01237e+06	4.10672e+06	3.85468e+06	4.61259e+06	4.29627e+06	70835.4	1.80319e+06	1.83104e+06	1.17745e+06	848954	2.07794e+06	2.26701e+06
1117.44604@5.797-rp	44681.1	70604.5	24359.8	28561.5	31833.1	32721.6	26943.8	57460.6	151473	22868.6	53071.4	31392.1	49927.8	33436.9	53108.8	43633.5	52466.7	42888.4	317276	621939	244891	362277	507707	846183	16691.5	145214	169649	146720	27782.9	145778	20689.8	40917.1	22677.3	33470.6	28088.1	85860.6	37601.4
1121.50895@6.33-rp	43000.4	27202.7	26684	28869.4	36256.1	40340.3	279157	60148	29232.9	405605	41516.6	42300.1	95255.9	39283.5	39991.2	69962.4	113873	35773	1.58136e+06	2.35006e+06	1.20222e+06	1.91525e+06	2.09065e+06	2.71744e+06	18952.1	675275	486528	614311	653301	618711	21179.2	57482.5	194673	233163	46978.4	33888.3	126972
1122.37179@5.489-rp	26811.2	29243.2	35369.7	26832.9	30058.1	51391.1	788604	24628.7	20011.4	370406	22518.7	20521.2	23555.2	57108.4	30044.7	20853.6	31149.6	35236.7	2.47631e+06	1.22212e+06	58680.1	1.34769e+06	2.01771e+06	1.72227e+06	15900.1	494964	530501	513839	537716	468959	17205.4	66843.8	1.11597e+06	19306.5	174189	167712	132789
1254.41366@5.279-rp	45179	24422.9	70495.7	23562.2	24610.3	55907	62624.4	30415.3	23926.9	48302	30739.8	24218.4	22800.5	29790	23370.5	23497.9	26937.8	24922	1.17684e+06	187703	63661	1.09911e+06	719236	423534	18010.1	161857	142207	104236	155213	116908	19782	29909	106835	21738	41937.2	38186.2	43372
1289.53125@6.611-rp	71405.6	50395.3	70390.9	56214.5	73112.3	60289.2	67796.6	1.77733e+06	123566	148234	65191.8	188047	144593	54230.2	55134.9	65169.7	149984	43941.4	389313	1.18869e+06	373982	270688	668096	802878	19032.2	267139	303643	224757	273745	293186	23154.7	105634	73675.7	61186.5	57285.8	68088.2	76814.6
1505.62721@6.417-rp	103798	74415.3	112754	98600.9	171806	127073	583948	2.36007e+06	2.04313e+06	175104	284046	276356	147427	62270.4	64666.8	84680.6	169059	57299.2	1.32667e+06	2.48696e+06	1836934	1.47898e+06	1.76667e+06	2.21096e+06	30069.6	958304	939566	823334	1.0863e+06	939885	34041.5	91618.5	66916.9	73097.9	70691.7	53730.9	71605.9
99.99999@0.956-rp	1.34014e+07	8.29677e+06	3.40466e+06	1.6722e+06	2.35416e+06	8.26328e+06	7.56393e+06	3.29964e+07	1.4936e+07	3.58922e+07	1.03598e+07	651887	2.35052e+06	4.84463e+06	1.04816e+07	3.65025e+06	4.72507e+06	1.60174e+06	2.86743e+07	3.32834e+07	1.03577e+07	9.12382e+06	2.57354e+07	5.31283e+07	7.37779e+06	1.22196e+07	1.42242e+07	1.24843e+07	1.59232e+07	1.634e+07	1.07387e+07	1.61836e+07	5.95459e+06	1.4167e+06	6.1652e+06	3.01266e+07	1.41842e+07
100.0011@6.107-rp	2.12992e+06	1.65974e+06	1.85324e+06	2.20783e+06	2.13717e+06	1.99462e+06	6.30155e+06	2.56757e+06	6.62612e+06	248216	6.52958e+06	3.00979e+06	1180283287	2.1866e+06	3.36958e+08	5.19908e+08	1578711516	3.06124e+06	2.60258e+06	3.36729e+06	2.43003e+06	2.5442e+06	3.33019e+06	2.86253e+06	2.30967e+06	3.5714e+07	4.56348e+07	4.07719e+07	4.56868e+07	4.3394e+07	2.60444e+06	2.42496e+06	196975	129770	7.00736e+06	3.48625e+06	2.19093e+06
100.00116@0.944-rp	1991746713	1299896489	7.25686e+08	6.82263e+08	1157522121	1300009197	1023101740	2982051776	2072549802	1786152728	1803961939	3.52778e+08	3.95415e+08	1740045319	1537350263	4.5291e+08	3.85305e+08	1.39741e+08	2533588977	2637669936	2169661762	1198913351	2328665642	2667052012	8.72135e+06	1633528189	1627871761	1557064784	1779103595	1714618523	9.84584e+06	1821725958	4.07819e+08	5.54624e+07	1026679358	2699971474	1556211569
Succinicanhydride@1.641-rp	4.1387e+06	1.50105e+06	1.6324e+06	2.29349e+06	1.42349e+07	4.42403e+06	3.20912e+06	1.31049e+07	5.25443e+06	8.68794e+06	6.71233e+06	8.89354e+06	3.93334e+06	3.17545e+06	2.48809e+06	2.70043e+06	2.25933e+06	2.97929e+06	3.47547e+06	3.68829e+06	4.02974e+06	4.92315e+06	4.8568e+06	3.88006e+06	383289	5.10708e+06	5.18995e+06	4.2745e+06	5.04391e+06	4.96393e+06	577473	9.23992e+06	4.52144e+06	5.89293e+06	3.31337e+06	7.11349e+06	4.81288e+06
100.01787@0.892-rp	4.34429e+06	2.29823e+06	1.00653e+06	409724	705651	2.41903e+06	2.04829e+06	5.68898e+06	4.26944e+06	3.51656e+06	3.93063e+06	1.89079e+06	471660	3.64039e+06	1.03657e+06	701370	736045	222916	5.24885e+06	5.73873e+06	4.40685e+06	2.5282e+06	4.30437e+06	6.35892e+06	106835	3.13019e+06	3.46515e+06	2.82686e+06	3.89181e+06	3.5615e+06	96992.8	3.81148e+06	619048	49982.9	2.20176e+06	4.68151e+06	3.65011e+06
100.01867@0.891-rp	1.72086e+08	122326587	6.30232e+07	5.9491e+07	9.76658e+07	1.18907e+08	1.15244e+08	2.10387e+08	1.85067e+08	1.657e+08	1.67497e+08	8.8432e+07	3.84166e+07	1.68841e+08	1.48405e+08	5.53595e+07	5.09956e+07	2.51671e+07	2.0085e+08	222215074	1.93011e+08	1.09312e+08	1.90531e+08	207016006	1.30103e+06	1.60707e+08	1.54759e+08	102236430	1.67833e+08	1.67682e+08	1.24045e+06	1.56654e+08	4.8751e+07	1.15843e+07	1.04922e+08	2.14322e+08	1.53949e+08
100.05167@1.134-rp	1.37137e+07	1.84766e+07	1.0719e+07	9.074e+06	1.04163e+07	1.81417e+07	2.41127e+06	3.67418e+06	2.66265e+06	2.71188e+06	3.90369e+06	3.74923e+06	7.44286e+06	1.00417e+07	5.95216e+06	4.48539e+06	8.82707e+06	7.14433e+06	3.89772e+06	5.7723e+06	8.89435e+06	3.5475e+06	3.50774e+06	7.13398e+06	44166.2	6.98599e+06	5.94957e+06	5.6973e+06	6.52516e+06	6.14045e+06	56687.6	3.53795e+06	2.86676e+06	2.15034e+06	1.76999e+06	2.01918e+06	2.49227e+06
4-pentenoicacid@1.13-rp	1.60972e+06	1.04181e+06	866667	831181	1.65952e+06	1.4817e+06	1.73726e+06	5.6125e+06	2.65428e+06	1.94264e+06	2.90829e+06	2.25648e+06	1.71902e+06	1.22165e+06	2.20743e+06	751708	730806	1.13458e+06	2.74105e+06	5.51569e+06	2.14184e+06	2.36781e+06	2.69411e+06	3.3664e+06	361601	1.9319e+06	2.00418e+06	1.5536e+06	2.28975e+06	2.19665e+06	359633	2.54104e+06	1.24386e+06	930296	1.0024e+06	1.59052e+06	1.64443e+06
NPYR@1.114-rp	349036	307653	238785	267448	338782	438943	627197	1.12181e+06	607704	628261	599457	538941	1.10747e+06	260523	323925	431684	337461	452098	258766	529927	446071	801784	380147	998030	25638.6	710348	594838	441529	787729	406160	52088.9	1.67288e+06	798062	429657	384323	427729	698476
101.00421@0.956-rp	8.43028e+06	4.76646e+06	2.50637e+06	1.93143e+06	3.92661e+06	5.33966e+06	3.85801e+06	1.17765e+07	9.83154e+06	7.7991e+06	6.56484e+06	2.94438e+06	970391	6.89026e+06	5.75263e+06	1.39106e+06	1.30016e+06	383292	8.99993e+06	1.04876e+07	9.10182e+06	4.59457e+06	8.98101e+06	1.00527e+07	169218	5.83391e+06	6.59357e+06	6.05616e+06	7.10504e+06	6.11721e+06	250757	7.0787e+06	1.22328e+06	381752	4.09923e+06	1.05503e+07	6.11972e+06
Carboxycyclopropylamine@1.134-rp	2.31375e+07	2.74908e+07	1.39619e+07	2.27976e+07	1.82413e+07	1.94565e+07	3.18677e+07	7.96635e+07	5.42301e+07	5.73551e+07	3.93898e+07	4.22391e+07	4.68682e+07	2.26817e+07	2.88929e+07	2.15467e+07	1.89532e+07	2.6252e+07	2.4904e+07	3.40162e+07	2.38012e+07	4.25976e+07	2.84814e+07	4.03919e+07	194314	3.82475e+07	3.23755e+07	3.05125e+07	2.38167e+07	3.50367e+07	305934	7.03397e+07	4.35835e+07	3.68109e+07	26335842	1.96722e+07	3.77092e+07
101.04888@1.324-rp	2.56994e+06	1.6618e+06	3.02312e+06	1.7178e+06	4.27801e+06	4.44897e+06	425112	566923	427802	919398	1.2693e+06	527457	990266	1.60215e+06	1.66133e+06	868598	900296	704057	2.07928e+06	1.73534e+06	2.10357e+06	643179	752365	1.5164e+06	32551	1.4469e+06	810573	1.24673e+06	832323	982579	38319.5	875166	562149	975413	1.36204e+06	709209	655542
101.08325@1.08-rp	4.72595e+06	4.29113e+06	2.73537e+06	3.15364e+06	3.42439e+06	4.32974e+06	1.18009e+06	3.28571e+06	2.47843e+06	1.9346e+06	3.06388e+06	2.5853e+06	428744	2.64604e+06	1.1125e+06	1.18804e+06	357529	939516	1.8138e+06	2.36208e+06	3.42408e+06	1.77615e+06	2.5955e+06	2.57952e+06	17069.9	2.47595e+06	2.20637e+06	1.8788e+06	3.14271e+06	2.54966e+06	25779.2	2.19332e+06	376072	349039	1.37642e+06	2.07533e+06	1.60609e+06
2-methylbutanaloxime@1.086-rp	728886	1.28702e+06	484547	607858	831189	1.30609e+06	537736	1.87161e+06	746396	1.50614e+06	1.45878e+06	593193	841371	700203	927490	687124	893600	832119	654009	879301	1.35704e+06	841601	948299	1.36305e+06	124075	637968	1.03277e+06	537935	893460	907020	125544	1.77892e+06	1.14779e+06	587183	591856	807324	676022
101.96098@0.95-rp	1.17967e+07	6.1877e+06	1.883e+06	1.40124e+06	2.23061e+06	7.07933e+06	4.93939e+06	3.25147e+07	1.33951e+07	3.28956e+07	8.0494e+06	919710	1.26875e+06	3.61534e+06	7.29772e+06	2.04314e+06	2.70541e+06	650490	2.63441e+07	2.93791e+07	9.32624e+06	6.68679e+06	2.37826e+07	5.03417e+07	3.27612e+06	1.36898e+07	1.24258e+07	1.16552e+07	1.35037e+07	1.34049e+07	5.01624e+06	1.54759e+07	3.56324e+06	535493	4.10744e+06	2.61853e+07	1.09216e+07
101.99862@0.947-rp	2.70254e+08	171423722	8.5146e+07	7.83251e+07	1.39087e+08	1.7077e+08	1.4106e+08	3.62433e+08	2.76614e+08	2.56987e+08	2.4395e+08	1.14923e+08	3.70316e+07	2.32393e+08	2.08537e+08	6.05474e+07	5.45024e+07	1.90078e+07	3.06602e+08	3.52848e+08	2.91208e+08	1.60921e+08	2.81179e+08	3.48616e+08	936275	219030522	220968711	1.88245e+08	2.41155e+08	2.35579e+08	1.18005e+06	2.35746e+08	4.95466e+07	6.24449e+06	1.33982e+08	3.22547e+08	2.129e+08
2-methyl-3-oxopropanoicacid@1.515-rp	3.42334e+07	8.25507e+06	2.72978e+07	6.81401e+06	3.02363e+07	1.36915e+07	2.59028e+07	3.3107e+07	5.64774e+07	3.70672e+07	1.4546e+07	2.36548e+07	8.19581e+06	1.06038e+07	1.69912e+07	7.30033e+06	1.45369e+07	1.1262e+07	3.04308e+07	3.41488e+07	2.97862e+07	2.70616e+07	3.76111e+07	4.9747e+07	539556	2.35414e+07	2.55814e+07	2.26903e+07	2.40729e+07	2.03923e+07	588704	1.0164e+07	1.51703e+07	1.16918e+07	2.83466e+07	2.85346e+07	1.87959e+07
2-methyl-3-oxopropanoicacid@1.132-rp	4.87288e+07	6.6558e+07	2.71164e+07	2.93805e+07	2.92969e+07	4.3628e+07	7.6224e+07	1.02464e+08	7.67177e+07	9.86796e+07	7.80572e+07	6.21095e+07	1.75935e+08	4.50921e+07	5.64107e+07	1.04215e+08	5.64702e+07	1.15041e+08	6.21478e+07	8.3018e+07	5.75795e+07	1.04171e+08	7.43623e+07	1.09245e+08	1.19248e+06	8.73434e+07	8.33878e+07	7.15166e+07	8.69462e+07	7.89123e+07	2.01002e+06	2.04675e+08	9.5352e+07	5.60941e+07	5.9078e+07	7.48196e+07	7.61394e+07
Phenylacetylene@1.992-rp	2.28998e+08	3.99061e+08	7.23218e+07	1.26479e+08	1.29913e+08	1.54376e+08	6.13176e+08	1150912242	5.64583e+08	9.3309e+08	4.66233e+08	3.51338e+08	1883184186	205608885	468379132	7.26356e+08	3.65071e+08	6.55898e+08	1.87901e+08	4.92984e+08	2.4248e+08	9.92312e+08	3.94919e+08	4.14338e+08	245665	5.36267e+08	5.60841e+08	4.71999e+08	5.43533e+08	5.87139e+08	420962	1937423859	6.93588e+08	3.37254e+08	4.38923e+08	4.07229e+08	5.62102e+08
103.01068@1.065-rp	1.11162e+06	763009	692187	832234	793906	771865	1.34992e+06	1.26057e+07	6.69823e+06	4.31413e+06	2.82889e+06	925503	889890	730658	758457	811896	832670	823599	1.61423e+06	7.21511e+06	772151	787338	3.03462e+06	7.6996e+06	43260	2.27763e+06	1.59649e+06	1.73299e+06	2.53464e+06	2.40518e+06	57789.7	3.62182e+06	780566	724457	2.17247e+06	6.5814e+06	3.07054e+06
Thiomorpholine@4.558-rp	120289	202825	126569	127116	141513	115454	703574	649373	832513	1.52439e+06	820856	578684	39961.9	48880.3	38637	36854.8	87737	54698.5	423135	649468	656408	620012	767090	1.12426e+06	47861.5	538370	537565	446772	544188	498776	52046.2	1.06497e+06	514783	190032	339638	643501	738212
Thiomorpholine@1.309-rp	2.27436e+06	4.36305e+06	686431	1.29075e+06	1.59743e+06	2.03778e+06	9.14536e+06	1.77862e+07	7.73058e+06	1.54711e+07	5.68509e+06	5.27808e+06	2.99679e+07	2.38262e+06	4.42678e+06	1.16257e+07	6.89531e+06	1.04188e+07	2.41289e+06	6.2558e+06	3.13563e+06	1.48638e+07	6.13557e+06	7.18688e+06	14885.6	8.7085e+06	8297638	7.3846e+06	8.98439e+06	8.18848e+06	16702.1	3.09514e+07	1.40717e+07	7.67981e+06	5.21719e+06	5.81535e+06	8.39186e+06
2-aminobutyricacid@1.089-rp	1.03325e+07	6.37573e+06	4.46086e+06	4.04526e+06	6.75103e+06	1.02324e+07	1.06186e+07	3.19419e+07	1.14672e+07	1.24707e+07	1.23062e+07	9.3129e+06	1.08204e+07	9.04061e+06	7.03003e+06	5.47449e+06	4.60847e+06	7.05346e+06	9.89745e+06	1.06424e+07	7.43581e+06	1.11545e+07	9.78914e+06	1.90052e+07	849549	1.13091e+07	1.10765e+07	1.01639e+07	1.18562e+07	1.11378e+07	1.19441e+06	2.88351e+07	5.88994e+06	5.50169e+06	9.50569e+06	9.36398e+06	8.3008e+06
103.0706@1.103-rp	1.46435e+07	9.85609e+06	1.41382e+07	1.14481e+07	1.42259e+07	1.41106e+07	3.19141e+06	1.62611e+07	9.51712e+06	7.52396e+06	1.19623e+07	1.01123e+07	4.77729e+06	1.19968e+07	7.06587e+06	4.73888e+06	1.84848e+06	3.50638e+06	9.14214e+06	1.26651e+07	1.67502e+07	5.1768e+06	7.38316e+06	1.15478e+07	8880.13	1.09286e+07	7.06893e+06	9.03379e+06	1.22753e+07	1.17043e+07	11700.6	9.24599e+06	2.50643e+06	954529	7.78407e+06	6.57798e+06	9.67036e+06
Choline@1.093-rp	4.02268e+07	1.45213e+08	20063224	2.95176e+07	1.49025e+08	6.9558e+07	2.27429e+08	3.28246e+08	2.07798e+08	8.54916e+08	883166389	4.92513e+08	7.80869e+08	1.23735e+08	2.72061e+08	4.93118e+08	254723728	4.81377e+08	8.66707e+07	1.33802e+08	1093646867	2.98914e+08	3.02446e+08	3.70717e+08	184253	4.16763e+08	371372621	3.42858e+08	4.6925e+08	403704708	261203	4.76032e+08	8.44633e+08	4.27666e+08	1.96527e+08	2.33916e+08	6.51568e+08
103.98509@1.035-rp	153079771	190274807	1.9411e+08	2.79929e+08	2.26812e+08	2.17025e+08	1.88425e+08	5.48506e+07	1.21221e+08	7.91935e+07	1.70599e+08	2.55524e+08	2.43569e+08	1.8864e+08	2.15075e+08	2.36969e+08	3.44185e+08	2.83969e+08	8.44375e+07	9.04767e+07	1.597e+08	1.5901e+08	1.39554e+08	5.77828e+07	1.71512e+06	175178197	1.62764e+08	1.41203e+08	1.70008e+08	1.69149e+08	2.38917e+06	8.75265e+07	2.42237e+08	2.92212e+08	1.76377e+08	9.97752e+07	1.64e+08
2-hydroxy-3-oxopropanoicacid@1.152-rp	9.4718e+06	7.79285e+06	1.00699e+07	7.61359e+06	9.55133e+06	9.145e+06	7.41452e+06	7.30345e+06	8.05004e+06	7.54438e+06	1.33473e+07	9.8834e+06	1.06908e+07	6.969e+06	8.64439e+06	6.43702e+06	4.45923e+06	9.9103e+06	5.9386e+06	6.02347e+06	1.16401e+07	7.01117e+06	5.37059e+06	6.99971e+06	204082	9.14988e+06	9.61214e+06	8.81623e+06	9.73635e+06	7.6953e+06	191885	1.22422e+07	3.96098e+06	8.22378e+06	15877732	7.06701e+06	7.04004e+06
2-hydroxy-3-oxopropanoicacid@1.31-rp	9.36548e+06	5.61687e+06	7.06197e+06	6.44438e+06	8.30778e+06	9.38642e+06	782386	1.94025e+06	2.13665e+06	5.21744e+06	4.86503e+06	2.54918e+06	5.0199e+06	5.52291e+06	5.85058e+06	3.82965e+06	2.42938e+06	3.11362e+06	5.51884e+06	3.41644e+06	1.37305e+07	5.51667e+06	5.78826e+06	7.71009e+06	332691	4.23269e+06	4.97561e+06	4.27215e+06	4.91394e+06	4.56252e+06	433093	7.80093e+06	1.74562e+06	778563	1.79916e+06	4.38133e+06	2.77578e+06
2-hydroxybutyricacid@1.655-rp	707594	626830	494419	866009	1.18766e+06	510514	3.42279e+06	7.89163e+06	6.42795e+06	8.15113e+06	1.34374e+06	3.16573e+06	3.21329e+06	1.76231e+06	4.81802e+06	3.18904e+06	2.63862e+06	1.81273e+06	6.52544e+06	8.08981e+06	3.32136e+06	5.31481e+06	6.55471e+06	1.00295e+06	136140	3.93521e+06	4.15798e+06	3.7185e+06	4.18202e+06	3.97245e+06	93805.8	1.05232e+07	5.87204e+06	3.34646e+06	3.87762e+06	9.48688e+06	4.82602e+06
2-hydroxybutyricacid@3.476-rp	89751.5	86555.3	71620.5	70740.2	82887.7	90064.1	89283.4	366570	223395	210448	54837.8	953782	106620	94199.5	25152	99198.2	90234.2	95985.7	95162	101899	95256.9	87402.3	124637	123043	66290.7	85836.6	85657.7	74285.3	50496.6	84412.3	106995	217758	99279.3	369468	23940.1	168223	70543.1
104.05969@1.51-rp	1.25295e+06	305382	631102	1.26015e+06	1.88765e+06	2.34986e+06	878357	1.22109e+07	300807	2.20231e+06	956010	2.18625e+06	287168	1.6222e+06	210350	143808	130446	129687	472447	1.28086e+06	1.09927e+06	1.22597e+06	699736	4.26885e+06	21274.6	1.28239e+06	1.29163e+06	1.17253e+06	1.55154e+06	1.43006e+06	36733.8	6.59966e+06	187989	120890	2.40402e+06	1.26633e+06	698463
2-(Methylthio)acetamide@1.574-rp	400014	973704	2.44075e+06	1.45202e+06	773366	1.19139e+06	2.56846e+06	395550	1.8011e+06	278974	2.32061e+06	2.16752e+06	2.99168e+06	1.6887e+06	538708	141425	204437	1.44943e+06	502248	1.03299e+06	748869	2.12313e+06	347614	1.0267e+06	279816	1.32921e+06	1.47948e+06	1.33796e+06	1.2433e+06	1.08864e+06	286409	155669	108937	3.48146e+06	3.07251e+06	311052	266038
Serine@1.101-rp	5.30932e+07	7.88778e+07	1.83207e+07	2.99126e+07	3.98334e+07	4.74323e+07	1.25101e+08	1.66032e+08	1.14292e+08	1.71152e+08	1.19417e+08	1.0914e+08	3.46175e+08	5.06015e+07	7.12033e+07	1.44037e+08	8.3543e+07	1.75431e+08	6.23893e+07	1.01111e+08	5.7598e+07	1.92619e+08	1.0141e+08	1.33028e+08	2.1266e+06	1.30388e+08	1.24762e+08	1.04551e+08	1.37297e+08	1.24045e+08	2.68145e+06	3.81723e+08	1.62351e+08	1.01131e+08	8.51644e+07	9.38135e+07	1.11947e+08
105.05487@4.764-rp	946124	592274	870076	807147	718050	936684	25825.4	41521.7	24927.8	27475.4	28814.6	46339.6	26409.2	35946.5	25218.9	23847.4	29039.2	36812.3	35593	30764.9	36566.6	31841.9	25649.2	29159.7	29830.7	135661	137888	127226	125520	133473	35610	30238.2	46198.7	25539.7	31426.7	28637.2	27741.1
4-Vinylpyridine@4.755-rp	8.37962e+06	4.57007e+06	5.78909e+06	5.44431e+06	4.68802e+06	7.8302e+06	69449.6	106836	64327.3	70694.8	74140.6	119233	67951.3	92491	64888.7	61359.9	84407.8	94718.8	93898.6	79158.8	101324	81929.8	67659.4	75028.5	76755	1.09585e+06	1.09028e+06	1.06118e+06	1.08204e+06	1.1442e+06	91625.2	79211.2	118870	65714.2	80861.6	73684.1	72212.9
MFCD00084180@1.083-rp	1.5736e+07	7.36866e+06	7.46178e+06	6.90727e+06	7.16375e+06	1.16031e+07	817962	3.56648e+06	1.00427e+06	3.87412e+06	3.78947e+06	3.06618e+06	965006	1.66599e+06	1.189e+06	619421	655240	859092	1.91771e+06	2.76573e+06	5.50941e+06	1.97986e+06	2.08456e+06	4.48422e+06	38420.6	3.0003e+06	2.61886e+06	2.47368e+06	3.50683e+06	2.63818e+06	58023.2	3.48688e+06	846454	673466	1.13067e+06	1.58381e+06	1.77785e+06
Glycericacid@1.17-rp	1.89538e+06	1.06347e+06	1.69451e+06	1.97165e+06	1.99393e+06	2.51125e+06	1.38284e+07	3.121e+07	2.60923e+07	3.28088e+07	1.28118e+07	2.15014e+07	1.49412e+07	9.0491e+06	9.92007e+06	2.24974e+07	1.07645e+07	1.52865e+07	1.50211e+07	3.36017e+07	1.60779e+07	2.68913e+07	3.15937e+07	4.12984e+07	112371	1.38043e+07	1.59263e+07	1.4976e+07	1.55669e+07	1.43592e+07	66433.9	2.76869e+07	1.19609e+07	2.40956e+07	1.15028e+07	2.05803e+07	1.83137e+07
Benzaldehyde@8.678-rp	185838	187662	150324	203004	180236	213832	301728	883195	251803	210301	1.11492e+06	207934	1.71244e+06	136564	181045	2.77485e+06	455442	174525	188919	538777	1.02066e+06	252751	703553	81204.7	27665.8	819668	747921	707636	226284	765075	174789	1.21533e+06	223086	149413	932161	611541	186102
Benzaldehyde@10.153-rp	184533	135179	182728	149788	174139	142791	1.62947e+06	2.69595e+06	2.87974e+06	1.22888e+06	1.51887e+06	1.5884e+06	93936.6	118821	75633.8	65148.6	347643	95284.8	2.96803e+06	3.67929e+06	302913	1.02675e+06	2.32918e+06	2.33341e+06	62262.3	1.15084e+06	1.17103e+06	1.17743e+06	1.30268e+06	1.36071e+06	50807.3	996212	387137	354571	1.90329e+06	2.27787e+06	1.78245e+06
Benzaldehyde@6.811-rp	284177	271401	204225	254728	177781	221027	339443	315567	281327	229682	243141	275856	361647	190019	186310	249043	244375	218317	198038	3.11571e+07	223017	4.70112e+06	1.4001e+07	175715	187144	737965	704982	688516	701718	754304	171996	1.52287e+06	77505.5	234339	1.00709e+06	2.2098e+06	205044
Benzaldehyde@7.162-rp	125048	146879	129494	40749.9	136505	147735	225669	246983	2.51947e+07	227284	1.10404e+07	145535	118766	164206	133618	305478	391761	176262	166224	244684	133351	150928	210575	143245	134412	6.55518e+06	6.25711e+06	5.83586e+06	6.45758e+06	5.99338e+06	128333	208406	337787	184222	1.00709e+06	147878	179811
Benzaldehyde@1.995-rp	586724	1.04281e+06	200874	413831	404617	484919	1.65157e+06	3.29235e+06	1.72074e+06	2.43522e+06	1.59504e+06	1.20804e+06	5.36793e+06	728168	1.26372e+06	2.04738e+06	972667	2.54741e+06	457895	1.29259e+06	931268	2.90166e+06	1.05907e+06	1.92321e+06	375158	1.72268e+06	1.52012e+06	1.42344e+06	1.75364e+06	1.78007e+06	274497	4.7757e+06	1.72619e+06	889048	1.16649e+06	1.31673e+06	1.48658e+06
Benzaldehyde@8.392-rp	140879	135361	98291.2	144103	140319	119523	167250	154355	163428	135920	148126	895366	172065	154654	2.3135e+06	105872	449749	111358	928635	524497	978566	238983	697326	982503	107815	792147	724601	625004	725417	780853	81459.7	157686	205655	418579	932161	598852	116728
106.05809@1.1-rp	3.52141e+06	2.25032e+06	2.10182e+06	2.13696e+06	2.72628e+06	3.58957e+06	1.57943e+06	6.87047e+06	2.4696e+06	2.85542e+06	2.65838e+06	2.63419e+06	1.85236e+06	2.0981e+06	1.73372e+06	1.12327e+06	1.0405e+06	1.28554e+06	2.43552e+06	3.0373e+06	2.90999e+06	1.04022e+06	2.43732e+06	5.05924e+06	45904.9	2.04942e+06	2.41345e+06	2.07275e+06	2.06506e+06	2.84669e+06	63381.2	9.34377e+06	1.01134e+06	724842	1.24873e+06	1.61726e+06	1.2894e+06
106.07715@13.96-rp	390045	680221	95141.4	226238	137072	242525	358623	393575	317081	333191	266470	111676	250086	375097	297844	223274	341417	133566	109115	577966	176525	216675	259649	142048	16179.4	314352	309918	239798	398649	297964	17734	290398	265720	356949	193782	393160	300493
106.07724@14.4-rp	1.6518e+06	799667	111975	150687	78838.7	148378	1.70194e+06	2.41849e+06	2.17943e+06	1.99871e+06	1.63481e+06	599658	331954	193286	466589	577139	843048	243725	730217	2.14162e+06	330357	1.11921e+06	682291	828454	22968.2	1.55179e+06	1.73253e+06	1.68905e+06	2.00228e+06	1.93012e+06	25070.4	1.90041e+06	3.35002e+06	2.62851e+06	1.85993e+06	2.44763e+06	2.83181e+06
Ethylbenzene@14.401-rp	4.93226e+06	2.10028e+06	433306	639389	100104	618943	5.07225e+06	5.93986e+06	5.33106e+06	5.32416e+06	5.046e+06	1.53424e+06	990887	660269	1.49921e+06	2.03388e+06	2.47891e+06	390496	2.39748e+06	6.33607e+06	1.45939e+06	2.54348e+06	4.73704e+06	2.21391e+06	22193.8	4.95664e+06	5.03707e+06	4.83467e+06	4.60602e+06	5.26614e+06	24225	6.84845e+06	9.33759e+06	7.08755e+06	5.02422e+06	7.06134e+06	8.70228e+06
Ethylbenzene@13.437-rp	1.2266e+06	1.33505e+06	124641	390368	88642.7	263761	2.14392e+06	2.38451e+06	3.59393e+06	1.49388e+06	2.26211e+06	491638	136431	304899	389962	237735	505601	67569.6	604614	897890	186294	155799	196025	220481	20254.5	984937	1.00024e+06	877956	1.18433e+06	1.0181e+06	22952.4	1.75457e+06	1.0884e+06	2.39773e+06	1.34794e+06	1.77002e+06	1.94493e+06
Ethylbenzene@13.959-rp	1.37795e+06	1.90424e+06	236661	559323	138491	747249	437150	895745	1.04542e+06	618640	599851	217051	577310	554368	843896	612720	1.04258e+06	287176	211329	1.05966e+06	368573	541974	553262	434051	16087.7	625866	636767	699262	791964	833885	17633.6	731297	530886	579469	724730	1.05411e+06	710358
106.592@7.21-rp	210372	153798	65966.2	68554.8	85124.7	107910	1.45886e+06	227071	558243	382367	1.50741e+06	69320.5	4.15508e+06	154091	337594	2.22302e+06	659072	98670.2	56210.8	85629.3	80030.6	165134	74681.4	76178.4	34291.6	974573	778179	633263	1.02559e+06	805154	38938.6	562504	568269	309923	130541	104459	278175
107.56355@1.098-rp	5.3671e+06	3.49744e+06	3.74245e+06	2.96493e+06	3.70723e+06	5.26571e+06	2.43877e+06	1.43479e+07	3.8891e+06	4.3402e+06	5.09365e+06	3.15649e+06	2.77941e+06	3.11665e+06	2.04569e+06	1.86627e+06	1.81868e+06	1.92265e+06	3.55935e+06	4.89275e+06	4.88717e+06	3.53784e+06	3.18942e+06	7.29999e+06	25458	4.4177e+06	3.31725e+06	3.26087e+06	4.23642e+06	3.52095e+06	32817	7.74365e+06	1.14504e+06	563978	2.40337e+06	2.4395e+06	2.10679e+06
Vinylsulfonicacid@1.185-rp	7.27394e+06	4.93719e+06	4.32706e+06	3.65165e+06	3.45995e+06	5.61251e+06	2.02351e+06	3.79366e+06	4.16164e+06	2.64301e+06	2.96372e+06	2.58964e+06	1.47613e+06	4.42331e+06	2.70189e+06	2.00953e+06	3.4107e+06	1.97635e+06	3.8951e+06	5.83133e+06	4.12431e+06	2.18871e+06	4.11118e+06	6.17703e+06	62064.7	3.59666e+06	4.1183e+06	3.37459e+06	4.28693e+06	3.44375e+06	65284.3	1.73752e+06	2.27392e+06	1.56068e+06	3.66195e+06	3.01183e+06	2.96488e+06
benzoquinone@1.131-rp	4.00979e+07	3.73492e+07	3.8598e+07	3.48291e+07	4.38843e+07	4.39637e+07	6.42057e+06	5.81022e+06	4.19434e+06	1.3625e+07	2.17215e+07	1.84906e+07	1.20095e+07	1.94934e+07	1.27269e+07	5.93797e+06	8.21147e+06	1.3647e+07	1.43242e+07	6.50335e+06	2.48291e+07	1.41847e+07	1.35773e+07	1.45844e+07	736459	1.98005e+07	1.84526e+07	1.61256e+07	1.86889e+07	1.82969e+07	434012	9.34642e+06	5.62056e+06	5.94703e+06	5.9991e+06	8.39446e+06	1.09457e+07
benzoquinone@1.517-rp	1.08596e+06	1.39967e+06	1.47312e+06	717146	1.39136e+06	1.36786e+06	2.16803e+06	4.68065e+06	3.24061e+06	2.21606e+06	1.83081e+06	2.93524e+06	2.14443e+06	913741	1.92075e+06	1.32381e+06	349146	1.25791e+06	899243	2.95305e+06	1.19045e+06	1.48098e+06	1.28527e+06	1.91157e+06	59059.6	1.89971e+06	2.47208e+06	2.12354e+06	2.03421e+06	2.04246e+06	48185	2.98521e+06	905503	1.10926e+06	1.74466e+06	1.83319e+06	2.35005e+06
(1Z,5Z)-1,5-Cyclooctadiene@15.525-rp	869401	762642	294606	254758	258409	140570	660447	439912	1.84472e+06	1.99911e+06	2.854e+06	429272	1.71278e+06	1.16177e+06	6.85773e+06	3.44056e+06	2.74142e+06	1.22636e+06	260737	700025	1.20886e+06	1.24768e+06	1.00702e+06	83030	281764	1.53352e+06	1.48883e+06	1.36297e+06	1.70855e+06	1.4732e+06	276152	1.93854e+06	2.74036e+06	2.61143e+06	1.3593e+06	1.35562e+06	2.00224e+06
2-aminophenol@1.346-rp	2.29579e+06	1.29278e+06	2.29924e+06	1.17591e+06	1.67841e+06	2.20246e+06	964794	3.02264e+06	2.3064e+06	1.76033e+06	1.37491e+06	1.6461e+06	1.12662e+06	2.44222e+06	1.17149e+06	716399	1.07166e+06	580057	1.9174e+06	2.9239e+06	2.16777e+06	818174	1.67158e+06	2.21595e+06	168182	1.82823e+06	1.86681e+06	1.14858e+06	1.37542e+06	1.49535e+06	139426	1.44226e+06	793540	694173	1.49252e+06	2.67889e+06	1.47928e+06
109.06343@1.088-rp	794644	750911	857203	539259	957875	841609	934618	4.71325e+06	904340	2.53179e+06	1.60331e+06	1.52226e+06	1.58609e+06	963271	339563	384511	354836	399588	1.3642e+06	1.25311e+06	1.2909e+06	1.67066e+06	1.25105e+06	2.16462e+06	77082	1.19257e+06	1.12954e+06	942619	1.43367e+06	1.27469e+06	140975	3.78532e+06	1.19493e+06	418060	1.05524e+06	1.34177e+06	1.35271e+06
3,4-Diaminopyridine@6.634-rp	113174	349825	111566	89653.1	115879	95555.4	217875	188191	568493	107850	146843	131370	5.72767e+06	87025.7	1.88947e+06	472972	243467	162658	101160	150488	128697	168568	236772	125024	95033.9	1.33713e+06	1.52768e+06	1.19072e+06	1.67604e+06	1.20843e+06	86217.8	262614	654275	328223	407200	167777	216774
3,4-Diaminopyridine@1.084-rp	3.82165e+06	3.63839e+06	2.43281e+06	2.25318e+06	2.81889e+06	2.03691e+06	5.29559e+06	1.0547e+07	8.08536e+06	7.71856e+06	6.48425e+06	4.7342e+06	1.08243e+07	2.72764e+06	2.87902e+06	5.1684e+06	975735	7.2438e+06	4.23665e+06	6.22275e+06	4.7763e+06	8.50724e+06	4.13391e+06	7.46271e+06	81447.1	7.36434e+06	7.14906e+06	4.89847e+06	5.91152e+06	5.42413e+06	114146	1.51756e+07	2.218e+06	816590	4.63985e+06	6.09524e+06	5.3081e+06
109.96811@1.361-rp	443502	529530	311811	367719	381788	436679	763512	4.61221e+06	2.32936e+06	1.12236e+07	2.40082e+06	1.57408e+06	1.77041e+06	614746	2.16952e+06	910785	603948	804209	3.44212e+06	7.93999e+06	2.96901e+06	3.47984e+06	8.70162e+06	5.99198e+06	202266	4.90559e+06	4.38332e+06	3.93465e+06	3.9668e+06	4.06109e+06	265159	2.34261e+06	870072	565184	631540	8.48616e+06	2.41264e+06
110.02166@1.355-rp	777734	2.56734e+06	361402	358022	382251	437208	6.61466e+06	4.02271e+06	9.11522e+06	8.91128e+06	7.50626e+06	811652	1.74638e+06	6.7264e+06	6.77714e+06	2.4326e+06	1.03964e+06	3.25948e+06	2.34027e+06	1.19366e+07	8.1714e+06	4.66378e+06	1.19961e+07	2.69127e+06	219107	9.26895e+06	7.5921e+06	6.95407e+06	8.73512e+06	8.48515e+06	259090	5.34509e+06	1.37481e+06	565869	5.19652e+06	1.54564e+07	8.2472e+06
5-methyl-2-furfural@1.148-rp	8.71244e+06	5.24434e+06	6.0669e+06	5.27709e+06	5.70352e+06	6.85325e+06	1.2258e+06	4.91345e+06	5.01034e+06	6.7746e+06	5.34119e+06	3.97206e+06	1.28462e+06	3.8584e+06	4.42738e+06	1.79447e+06	1.75148e+06	1.6112e+06	2.68004e+06	4.64761e+06	5.78176e+06	2.16233e+06	2.65081e+06	5.43232e+06	563183	3.8768e+06	4.25554e+06	4.17019e+06	5.00872e+06	5.42373e+06	576621	5.52554e+06	4.26084e+06	1.01038e+06	2.71301e+06	7.16037e+06	4.04773e+06
Imidazole-4-acetaldehyde@1.787-rp	4.08764e+06	2.48987e+06	1.31608e+07	5.01523e+06	3.09925e+06	7.49763e+06	3.32725e+06	1.91652e+06	2.66123e+06	1.72539e+06	3.96413e+06	1.14734e+06	3.27001e+06	5.2287e+06	2.68584e+06	1.43109e+06	2.44772e+06	1.91802e+06	3.31037e+06	1.71497e+06	3.65917e+06	1.55756e+06	797365	1.75198e+06	644569	4.36904e+06	2.98062e+06	2.61764e+06	3.96055e+06	3.50608e+06	865770	2.97324e+06	1.29274e+06	1.37136e+06	2.36754e+06	900062	1.82049e+06
Imidazole-4-acetaldehyde@1.096-rp	984492	990964	816713	977964	858999	1.07782e+06	2.39761e+06	6.0503e+06	5.58591e+06	3.02393e+06	2.27861e+06	1.37142e+06	1.5386e+06	631631	1.05359e+06	1.84028e+06	1.3505e+06	1.13213e+06	2.10279e+06	3.1819e+06	1.40571e+06	2.05137e+06	2.45863e+06	3.62652e+06	130052	2.4857e+06	1.80559e+06	1.98401e+06	2.78674e+06	2.23314e+06	180610	6.18819e+06	2.7838e+06	2.5077e+06	2.93784e+06	3.63327e+06	4.21094e+06
4,4-Dimethyl-1-hexyne@17.812-rp	239150	236642	175443	105320	111955	137042	294723	906064	2.05661e+06	627373	1.03183e+06	1.79915e+06	399621	252447	1.97691e+06	1.23648e+06	717314	792650	330914	1.30263e+06	362938	960255	1.03284e+06	145393	72571.9	753381	635342	719523	821756	686395	89852.7	1.18198e+06	1.22009e+06	1.11191e+06	432722	1.62971e+06	983488
2,5-dihydroxypyridine@1.342-rp	216406	293864	172939	148101	187949	201032	139625	1.30619e+06	306837	2.30158e+06	444567	583115	339563	193570	521586	341023	239493	279148	1.33239e+06	1.97454e+06	1.06069e+06	1.50232e+06	2.31033e+06	3.12993e+06	136949	848607	836474	889517	859275	1.11812e+06	139460	1.67909e+06	441073	141918	157626	1.46682e+06	474309
111.04236@1.149-rp	1.89538e+06	1.24014e+06	2.13493e+06	2.83823e+06	2.15864e+06	2.21448e+06	483200	645368	596664	699795	2.32175e+06	1.31801e+06	404481	1.09554e+06	1.40749e+06	556940	796027	622542	1.16078e+06	486290	1.86516e+06	771734	836090	1.11876e+06	13262.6	994212	943883	830681	1.08144e+06	1.01121e+06	15657.3	305284	555978	431298	596152	886949	1.19875e+06
111.04246@1.286-rp	369801	714935	135410	141196	671370	721946	889168	1.45529e+06	2.21917e+06	1.04885e+06	757443	1.5535e+06	943652	367587	112919	233994	361025	684555	572212	621230	396059	786418	811227	1.46961e+06	22542.6	637021	691080	631962	570314	721099	25293.6	1.39357e+06	735412	1.86021e+06	1.29534e+06	558724	1.03248e+06
Cytosine@1.28-rp	8.08289e+06	1.3213e+07	3.52668e+06	5.83411e+06	7.51942e+06	9.83012e+06	9.71035e+06	8.2439e+06	1.84369e+07	8.92067e+06	4.6404e+06	6.37534e+06	1.82653e+07	4.79822e+06	2.46714e+06	9.31687e+06	7.20266e+06	9.16168e+06	3.35007e+06	1.25822e+07	4.9301e+06	1.68349e+07	9.4878e+06	1.44608e+07	103924	9.36129e+06	8.50463e+06	8.16239e+06	9.08724e+06	9.11078e+06	180113	1.22413e+07	8.18152e+06	1.93776e+07	1.00124e+07	5.42719e+06	1.36445e+07
Cytosine@1.13-rp	1.31999e+07	1.61155e+07	9.275e+06	8.90357e+06	9.58812e+06	1.92024e+07	2.76305e+07	2.54229e+07	3.41278e+07	3.62994e+07	2.27555e+07	1.45302e+07	2.1628e+07	1.51054e+07	1.78326e+07	1.44465e+07	1.7207e+07	1.32708e+07	1.4034e+07	3.7709e+07	1.77349e+07	2.40086e+07	3.74332e+07	4.72093e+07	228321	2.25005e+07	1.94167e+07	1.80452e+07	2.17325e+07	2.00329e+07	267812	2.28746e+07	2.95974e+07	8.51128e+06	8.55103e+06	2.08099e+07	2.04224e+07
Cytosine@1.516-rp	7.18914e+06	5.81392e+07	4.09932e+06	4.26943e+06	5.32338e+06	9.52824e+06	1.7845e+07	8.45345e+06	1.07478e+07	1.17285e+07	7.41925e+06	1.07506e+07	9.56983e+07	5.76836e+06	3.99152e+06	3.02687e+07	9.63899e+06	9.52022e+07	2.51352e+06	1.03971e+07	5.01224e+06	3.29334e+07	1.56405e+07	1.36246e+07	90674.5	1.57782e+07	1.58382e+07	1.2813e+07	1.99016e+07	1.30525e+07	165000	1.23088e+07	1.24332e+07	8.95821e+06	1.39316e+07	1.3179e+07	2.50679e+07
111.04387@1.275-rp	2.68756e+06	2.0453e+06	2.36988e+06	1.88852e+06	1.98904e+06	3.7661e+06	545000	1.3336e+06	1.13561e+06	1.11407e+06	1.58466e+06	1.20319e+06	1.04043e+06	2.5999e+06	1.34762e+06	680141	1.49921e+06	943082	1.25742e+06	1.07239e+06	3.34603e+06	1.46425e+06	1.20886e+06	1.66118e+06	35964	1.49526e+06	1.36917e+06	1.27391e+06	1.10223e+06	1.11756e+06	40928.7	543068	1.1652e+06	687403	921896	698456	1.25468e+06
111.05018@1.26-rp	1.5421e+06	934353	1.03858e+06	857186	997170	1.3104e+06	1.11601e+06	1.4154e+06	1.47693e+06	824247	1.44142e+06	715969	1.04087e+06	1.3305e+06	710256	733212	872954	845305	1.44278e+06	2.1648e+06	1.50193e+06	777383	1.57573e+06	1.28028e+06	19618.6	1.18505e+06	1.08565e+06	931048	1.16697e+06	1.04155e+06	22412.7	472735	387215	452978	319779	557631	450555
pyrrolizidine@7.091-rp	2218744	1.30052e+06	148009	151005	187503	237693	5.14888e+06	611228	2.06934e+07	741548	2.65107e+06	153733	3.89282e+07	509606	2.30429e+07	7.03534e+07	1.37923e+06	298013	156647	3.05473e+07	197854	679994	383362	165778	72292	6.91526e+06	7.00055e+06	6.426e+06	6.80782e+06	4.27401e+06	85769.7	691431	1.25172e+06	762982	1.70257e+07	337483	2.41081e+06
pyrrolizidine@6.545-rp	316943	144244	240808	247582	299328	163323	177232	1.71139e+08	115454	104676	232414	134989	5.45227e+06	1.54696e+07	2.37919e+06	472920	459710	1.27927e+07	195628	1.24943e+06	8.0221e+06	1.05462e+07	302970	241778	59665.5	2.52001e+06	2.27473e+06	1.96785e+06	2.29444e+06	2.09541e+06	70970.6	393359	214025	149833	218270	3.37356e+07	218617
pyrrolizidine@7.521-rp	6.95992e+06	1.3637e+06	94247	94417.6	114916	128465	6.86746e+07	1.32367e+06	557170	5.19596e+06	6.38578e+07	110913	2.14178e+06	335581	273808	2.18291e+06	760388	177660	99281.5	312817	117327	156419	169163	142923	54803.8	4.65917e+07	4.51596e+07	4.27451e+07	4.98359e+07	4.78217e+07	60888.8	660954	457604	338885	335190	369861	1.73833e+06
Methylbisulfate@1.16-rp	2.34032e+07	1.27978e+07	3.06607e+07	3.74103e+07	3.5285e+07	2.43757e+07	9.35169e+06	2.55741e+07	2.79801e+07	1.15212e+07	1.14712e+07	9.24346e+06	8.16371e+06	1.60927e+07	2.18275e+07	2.92301e+07	3.32415e+07	8.25476e+06	2.15566e+07	3.12844e+07	1.31441e+07	1.00321e+07	2.12749e+07	1.43171e+07	229629	1.71907e+07	1.44019e+07	1.69909e+07	2.01617e+07	1.81749e+07	293286	1.30099e+07	5.62777e+07	4.48259e+06	1.20846e+07	2.03673e+07	2.44266e+07
Hydroxymethylphosphonicacid@1.187-rp	4.33084e+06	3.9239e+06	2.349e+06	2.72778e+06	4.18084e+06	3.94805e+06	3.47291e+06	1.69248e+07	1.97459e+06	4.57902e+06	4.19773e+06	5.74486e+06	4.16426e+06	4.21585e+06	2.61277e+06	6.61071e+06	2.16862e+06	8.19757e+06	6.38414e+06	3.81854e+06	4.00873e+06	6.46168e+06	5.95663e+06	6.93373e+06	144073	5.40945e+06	5.90877e+06	5.11509e+06	4.87711e+06	5.06988e+06	139317	1.41418e+07	1.05267e+07	3.36987e+06	5.3309e+06	6.2211e+06	3.77897e+06
112.00109@1.36-rp	758675	994890	645737	567078	588775	840199	7.78754e+06	9.23767e+06	2.38416e+07	4.00012e+07	2.84324e+07	1.59448e+06	2.51361e+06	1.21629e+07	2.84855e+07	4.57252e+06	2.75474e+06	5.50509e+06	4.96341e+06	4.61852e+07	2.29235e+07	1.9601e+07	4.18946e+07	5.29522e+06	414753	3.40228e+07	3.36225e+07	2.93987e+07	3.13287e+07	3.11947e+07	570945	1.08317e+07	2.6766e+06	2.01012e+06	8.11506e+06	4.60362e+07	2.43196e+07
2-furoicacid@1.069-rp	1.21762e+06	1.07272e+06	1.24536e+06	1.17798e+06	1.02238e+06	1.82253e+06	3.04933e+06	3.2031e+07	2.11359e+07	9.95597e+06	7.03649e+06	489873	502897	1.58343e+06	1.59916e+06	699980	747791	892582	4.3732e+06	2.27792e+07	1.95477e+06	1.80892e+06	9.97801e+06	2.17932e+07	446282	8.50765e+06	8.02837e+06	4.87131e+06	6.13062e+06	7.17581e+06	330323	1.07643e+07	817075	409407	6.65159e+06	1.91522e+07	9.18361e+06
2-furoicacid@1.545-rp	3.95328e+06	9.99364e+06	1.10217e+07	5.84268e+06	1.4519e+07	1.41937e+07	2.03822e+07	48165692	3.36733e+07	8.25819e+07	5.4371e+07	8.2186e+07	3.62943e+07	2.18469e+07	4.64143e+07	2.13613e+07	2.40087e+07	3.08512e+07	6.18125e+07	5.01655e+07	9.43128e+07	5.99872e+07	6.86978e+07	1.07061e+08	3.32536e+06	4.16243e+07	3.95624e+07	3.32419e+07	4.61596e+07	4.23944e+07	4.54148e+06	6.16017e+07	3.99161e+07	16183378	2.32328e+07	5.05454e+07	4.56234e+07
2-furoicacid@1.316-rp	4.45666e+06	2.33182e+06	4.38231e+06	3.21046e+06	2.0705e+06	4.54741e+06	1.25032e+06	1.00213e+06	831117	2.30816e+06	1.66017e+06	1.4838e+06	1.09825e+06	1.92558e+06	1.3075e+06	492839	1.05061e+06	976487	1.50174e+06	1.35285e+06	3.79839e+06	990234	1.20731e+06	1.40493e+06	310497	1.31035e+06	1.33134e+06	1.66234e+06	1.82686e+06	1.63906e+06	285282	1.43289e+06	1.78888e+06	706961	938250	878924	1.40735e+06
Uracil@3.223-rp	224512	279146	183777	146003	188196	250863	377902	706500	942202	619686	1.29137e+06	989609	880391	170419	172775	346217	149886	315437	239863	509281	219905	506321	565690	641849	124542	531598	491502	494130	594167	500106	184853	774542	651626	1.19922e+06	588026	758224	2.08517e+06
Uracil@1.807-rp	3.91416e+06	9.33786e+06	1.26617e+06	2.33375e+06	5.4734e+06	3.50981e+06	1.01008e+07	7.26646e+06	8.79257e+06	6.9913e+06	7.12637e+06	7444877	3.79881e+07	5.54039e+06	3.56709e+06	1.9918e+07	1.20131e+07	1.5719e+07	5.84921e+06	1.53653e+07	8.61134e+06	2.38434e+07	1.31327e+07	1.98674e+07	123984	1.02457e+07	9.29045e+06	9.8937e+06	9.71442e+06	1.08712e+07	141971	1.1936e+07	1.28899e+07	1.61921e+07	1.46488e+07	7.8518e+06	1.52146e+07
Uracil@2.412-rp	163807	2.57478e+06	24949.1	152364	167017	196795	382418	184675	235456	181124	229078	58619	5.71735e+06	190019	194698	1.15081e+06	149093	7.54274e+06	181431	278646	31993.7	847098	238170	227178	99304.3	638838	623045	486413	622089	635738	121237	387672	645873	134563	265688	209504	797789
Uracil@1.64-rp	7.34848e+06	1.45804e+07	9.0053e+06	6.09279e+06	1.46715e+07	1.17318e+07	3.16361e+07	3.40077e+07	4.15248e+07	3.62742e+07	5.26137e+06	8.1146e+06	3.59258e+07	1.03453e+07	6.29888e+06	2.62322e+07	1.6748e+07	2.58463e+07	1.09788e+07	1.65119e+07	3.98693e+06	3.75255e+07	1.85132e+07	1.3292e+07	364371	1.97003e+07	2.07936e+07	1.87244e+07	2.12502e+07	1.97388e+07	427625	6.50243e+07	4.30513e+07	1.93595e+07	1.19117e+07	1.62907e+07	3.39314e+07
Uracil@1.546-rp	2.07089e+06	1.92738e+06	1.97431e+06	1.07033e+06	1.88534e+06	1.6905e+06	2.0675e+06	4.9954e+06	3.52414e+06	1.37898e+06	1.03126e+07	1.56757e+07	2.50316e+06	1.54959e+07	8.12721e+06	1.77881e+06	1.97587e+06	3.48563e+06	3.08722e+06	3.77394e+06	9.56326e+06	2.70824e+06	2.66593e+06	2.10091e+06	489535	2.90002e+06	2.7255e+06	2.99027e+06	2.66666e+06	2.42161e+06	588837	3.39713e+06	2.34124e+06	1.28632e+06	2.50087e+06	2.80019e+06	1.79694e+06
112.04503@1.106-rp	8.35253e+07	4.3028e+07	6.55671e+07	5.89588e+07	5.8697e+07	7.42315e+07	8.2268e+06	1.09575e+07	9.01439e+06	2.18606e+07	2.53068e+07	1.45178e+07	1.88456e+07	2.68934e+07	1.57736e+07	10617897	1.42486e+07	2.05253e+07	1.67923e+07	1.16647e+07	4.66233e+07	1.4062e+07	1.58644e+07	2.09909e+07	70537.3	2.4549e+07	2.40174e+07	2.27621e+07	3.0595e+07	2.53053e+07	82773.9	1.11903e+07	7.63712e+06	9.91167e+06	1.08553e+07	8.96094e+06	9.54332e+06
112.05166@1.75-rp	7.87121e+06	5.35412e+06	6.62019e+06	7.00596e+06	7.17342e+06	7.93141e+06	1.36237e+06	2.66464e+06	1.90546e+06	2.48021e+06	4.16589e+06	3.06617e+06	2.01121e+06	5.09409e+06	3.39392e+06	1.85528e+06	3.12246e+06	2.41857e+06	3.47038e+06	2.62936e+06	7.90436e+06	2.34647e+06	3.10742e+06	3.25028e+06	27704.1	3.44858e+06	2.98625e+06	2.8237e+06	3.67398e+06	3.34201e+06	32929	2.59907e+06	1.64943e+06	1.61559e+06	1.95949e+06	2.08248e+06	2.06687e+06
Imidazole-2-methanol,1-methyl-@1.127-rp	820647	546064	423664	542162	662344	1.03238e+06	1.74313e+06	5.01299e+06	3.36676e+06	4.11149e+06	3.08e+06	2.39065e+06	855118	478429	560382	264077	266644	910192	970478	2.31015e+06	1.11445e+06	1.52566e+06	1.7028e+06	3.0118e+06	120417	1.71109e+06	1.60564e+06	1.45924e+06	2.51629e+06	1.80623e+06	144546	4.66709e+06	1.90626e+06	2.57537e+06	1.18632e+06	2.28199e+06	1.35182e+06
Hydrogensulfurothioate@1.009-rp	211251	221274	174848	204182	194061	176099	258606	1.83133e+06	1.27653e+06	326488	183448	206995	234253	186981	205767	204239	223066	208816	173425	221478	192254	181359	193227	235648	28373.5	243415	297340	211641	267553	241237	58875.5	417779	266943	233182	183988	214380	1.10943e+06
XJ4375000@4.756-rp	4.06748e+06	2.41708e+06	3.07117e+06	2.55932e+06	2.40349e+06	4.00832e+06	34309.6	52779.3	31686.3	34924.8	36627.1	58903.5	33569.4	45692.5	32056.4	30313.1	43958	46793.1	46387.9	39106.1	47935	40475.1	33425.2	37065.7	37918.6	535984	588463	509890	552619	497540	45264.8	39132	58724.4	32464.2	39947.3	36401.5	35674.7
1-pyrroline-2-carboxylicacid@1.678-rp	1.53524e+06	1.87694e+06	2.18973e+06	1.45926e+06	2.02667e+06	3.12285e+06	3.55657e+06	1.28992e+06	4.35145e+06	6.23249e+06	3.76051e+06	3.66935e+06	4.07646e+06	2.54268e+06	4.65558e+06	2.85568e+06	1.82903e+06	2.74591e+06	4.67714e+06	4.12636e+06	5.54546e+06	4.07318e+06	5.02781e+06	6.39898e+06	73169.4	3.33151e+06	4.48072e+06	2.50072e+06	3.31228e+06	4.15048e+06	221305	5.47013e+06	3.94837e+06	2.49659e+06	4.84545e+06	4.25071e+06	3.83343e+06
1-pyrroline-2-carboxylicacid@1.186-rp	7.84319e+07	5.34756e+07	5.26721e+07	4.61564e+07	5.09192e+07	6.92243e+07	3.63923e+07	9.10275e+07	8.67389e+07	6.05496e+07	6.93886e+07	5.65568e+07	3.5607e+07	6.84849e+07	4.42749e+07	3.43506e+07	5.15592e+07	3.24731e+07	5.05762e+07	108750452	6.65867e+07	5.20249e+07	6.86746e+07	6.38062e+07	1.09964e+06	5.0757e+07	5.58519e+07	4.36675e+07	5.07222e+07	5.42575e+07	1.08975e+06	3.99087e+07	2.16276e+07	1.80244e+07	1.76567e+07	2.36529e+07	2.89201e+07
113.08328@1.179-rp	231660	712497	62628	159291	1.10481e+06	201547	6.0446e+06	1.0907e+07	473588	7.25669e+06	550607	1.17194e+06	1.47631e+07	1.48615e+06	820501	5.55463e+06	1.18028e+06	1.52478e+07	655847	661014	533732	9.59458e+06	1.87392e+06	1.61479e+06	10154	3.73748e+06	3.0062e+06	2.52301e+06	2.63253e+06	2.65538e+06	11838.7	1.7388e+07	2.5474e+06	2.70271e+06	3.21101e+06	3.26538e+06	1.08194e+06
e-Caprolactam@1.164-rp	4.14459e+06	3.57248e+06	4.94337e+06	3.33333e+06	5.92552e+06	4.72531e+06	1.37653e+07	4.01787e+07	2.7051e+07	1.83782e+07	1.59699e+07	1.36796e+07	1.15028e+07	8.6799e+06	7.23589e+06	1.33834e+07	7.11307e+06	1.16857e+07	9.15119e+06	1.86274e+07	8.04906e+06	9.22107e+06	1.21087e+07	1.40098e+07	413534	1.40646e+07	1.25762e+07	9.99517e+06	1.24317e+07	1.0417e+07	372500	1.85731e+07	1.38401e+07	3.7689e+06	8.5227e+06	6.32977e+06	5.28251e+06
113.58168@6.478-rp	39696.6	27691.9	34817.9	43084.1	39343.7	36920.4	37300.6	52881.3	301983	22541.4	41606.3	28636.9	230141	40106.1	2.12917e+06	60210.2	103245	32742.4	28065.5	27953	31671.4	28672	27216.1	38136.1	14595.5	771431	746349	930114	756344	875312	18007.8	56019.7	36219.8	20130.5	52427.4	29224.7	34707.5
113.58173@6.665-rp	69498.8	49049.6	40054.7	36812.1	46950.2	58679.3	80858.8	115566	84063.1	66229.5	88996.5	66087.5	2.48952e+06	48574.9	2.12917e+06	457076	149510	39636	48865.2	55537.9	51511.5	58492	62099.3	51287.9	18596.3	771431	746349	930114	782050	875312	22375.8	102813	71708.3	59552.6	53020.6	66270	96775.9
113.58743@7.16-rp	177874	116699	55775.9	57964.7	71974.9	91240.6	1.01287e+06	216162	69750.5	302123	516508	58612.1	812776	123882	60584.1	478792	557260	77053.7	47527.5	69908.5	67667.8	104669	63144.8	56197.1	27093	159271	271176	182084	248962	269995	32923.5	320149	480485	262047	129312	80624.3	235203
Thiosulficacid@1.006-rp	4.47176e+06	1.07259e+07	9.47379e+06	1.03347e+07	1.23284e+06	3.50666e+06	1.77959e+07	2.23157e+08	1.29212e+08	3.30621e+07	2.01706e+07	1.51319e+07	7.87848e+06	6.28696e+06	1.51125e+07	6.80778e+06	1.29924e+07	3.28714e+06	2.79801e+06	1.98131e+07	2.21181e+06	3.23489e+06	5.85409e+06	3.21897e+06	189543	2.63353e+07	2.90962e+07	2.55163e+07	2.89402e+07	2.50572e+07	482686	4.40852e+07	2.72908e+07	1.52567e+07	5.21339e+06	2.67946e+07	9.0472e+07
Thiosulficacid@1.48-rp	1.08616e+07	2.50355e+07	2.31884e+07	2.58107e+07	2.40272e+06	7.63842e+06	5.4766e+07	3.80915e+08	2.46538e+08	4.54096e+07	3.83002e+07	3.90413e+07	1.61264e+07	1.63576e+07	2.733e+07	2.17079e+07	1.75397e+07	8.67858e+06	3.7355e+06	2.87968e+07	4.00898e+06	1.00008e+07	1.17014e+07	7.2382e+06	500475	4.25013e+07	5.2545e+07	4.48673e+07	6.26824e+07	4.05907e+07	2.0333e+06	6.69444e+07	3.04329e+07	2.56443e+07	1.38676e+07	5.29607e+07	1.45487e+08
Peroxymonosulfuricacid@1.188-rp	2.35899e+07	2.01761e+07	8.29017e+06	2.25572e+07	1.67356e+07	2.77372e+07	5.14382e+06	1.10326e+07	1.16666e+07	3.90136e+06	3.77247e+06	3.77566e+06	2.52454e+06	1.58727e+07	2.46777e+07	2.49292e+07	2.16954e+07	1.01253e+07	1.18506e+07	1.03321e+07	1.34077e+07	1.48412e+06	1.65526e+07	6.24599e+06	37262.6	1.32402e+07	1.48056e+07	1.52847e+07	1.86071e+07	1.90816e+07	102798	1.39589e+06	1.43095e+07	578053	3.09022e+06	1.33954e+07	1.03389e+07
2-hydroxy-2,4-pentadienoate@1.18-rp	3.27193e+07	2.21796e+07	3.12869e+07	2.72184e+07	2.82098e+07	3.39953e+07	1.04687e+07	1.88335e+07	1.44978e+07	2.35823e+07	2.94218e+07	1.58353e+07	2.78813e+07	3.46806e+07	3.67033e+07	2.8027e+07	3.47948e+07	2.09766e+07	4.40925e+07	1.69053e+07	3.64268e+07	2.0135e+07	2.79033e+07	2.88736e+07	1.04197e+06	2.55908e+07	2.56384e+07	2.24101e+07	27467266	2.6149e+07	1.82349e+06	2.26086e+07	4.84148e+07	9.96708e+06	2.73079e+07	4.56833e+07	2.84988e+07
2-hydroxy-2,4-pentadienoate@7.943-rp	882379	1.45018e+06	1.45678e+06	822108	1.27408e+06	1.95907e+06	794149	749885	645947	76562.1	618205	80894.8	1.86401e+07	1.68018e+07	1.48128e+07	1.1232e+07	2.21787e+07	1.26649e+07	273718	337537	2.77654e+06	705969	939581	368539	704724	701252	830077	1.03661e+06	891212	1.00795e+06	522157	756150	917417	651584	82049	109333	701091
2-hydroxy-2,4-pentadienoate@8.77-rp	2.8635e+06	3.65569e+06	4.00584e+06	2.07803e+06	3.51521e+06	5.24135e+06	488474	68962.1	438786	489950	363466	422620	1.25782e+06	1.14357e+06	1.07336e+06	760435	1.49488e+06	1.32243e+06	805190	923484	1.46665e+07	674170	575666	656294	488729	4.62084e+06	3.88087e+06	4.60663e+06	4.66987e+06	4.27851e+06	343432	482162	579429	409377	563493	386271	590856
2-hydroxy-2,4-pentadienoate@1.519-rp	2.04222e+07	14736605	1.6528e+07	9.38133e+06	1.01596e+07	1.89682e+07	6.34907e+06	1.09962e+07	9.34218e+06	1.09068e+07	1.22548e+07	7.77821e+06	9.67161e+06	1.41965e+07	1.17874e+07	8.72497e+06	1.22781e+07	7.29302e+06	1.50467e+07	1.05671e+07	1.80221e+07	7.35671e+06	1.2106e+07	1.31381e+07	869678	1.28854e+07	1.1561e+07	1.02889e+07	1.26008e+07	1.20745e+07	1.52234e+06	1.21714e+07	1.71435e+07	5.80342e+06	1.53578e+07	2.26837e+07	1.59388e+07
2-hydroxy-2,4-pentadienoate@2.118-rp	4.5228e+06	1.20885e+06	4.39702e+06	4.95678e+06	273740	1.28556e+06	313549	897278	260039	2.31066e+06	991946	716522	1.19139e+06	2.47941e+06	423400	966806	1.18951e+06	1.03496e+06	808938	421669	2.6565e+06	845308	868595	1.17163e+06	621658	1.02929e+06	1.04801e+06	1.18041e+06	1.07117e+06	893243	499941	480869	1.43997e+06	896249	181386	1.46663e+06	494284
Beta-cyanoalanine@1.55-rp	4.22084e+06	5.97425e+06	3.66394e+06	3.60034e+06	4.60222e+06	4.05312e+06	5.19984e+06	6.71818e+06	6.74259e+06	4.72728e+06	3.36426e+06	4.08521e+06	7.57737e+06	4.34108e+06	5.04093e+06	5.59211e+06	6.10696e+06	4.81327e+06	3.44126e+06	4.35831e+06	5.71101e+06	4.13554e+06	6.33426e+06	4.5376e+06	249674	5.72851e+06	4.14715e+06	5.01282e+06	5.46982e+06	5.53891e+06	354768	9.12506e+06	6.69053e+06	2.56094e+06	2.59024e+06	4.2151e+06	4.03099e+06
1H-Inden-1-ylidene@3.147-rp	1.26035e+07	1.67498e+07	3.37538e+06	4.51497e+06	4.25017e+06	7.60093e+06	1.74075e+07	2.02175e+07	2.27639e+07	2.46488e+07	2.07993e+07	1.28437e+07	1.6522e+07	7.80566e+06	1.94279e+07	1.51015e+07	2.32919e+06	1.28955e+07	9.66127e+06	2.25085e+07	9.3474e+06	1.77453e+07	1.24622e+07	1.32317e+07	35604.1	1.71344e+07	1.77833e+07	1.60147e+07	1.69272e+07	1.74955e+07	37459.2	3.78224e+07	4.33509e+06	2.75511e+06	1.46727e+07	1.56955e+07	1.45422e+07
1-Nitrosopiperidine@0.996-rp	6.11297e+07	6.58188e+07	1.5805e+07	2.15413e+07	3.82299e+07	3.3436e+07	1.05595e+08	288363233	1.26758e+08	1.42279e+08	9.61775e+07	7.62018e+07	3.6229e+08	3.67872e+07	5.63042e+07	1.63756e+08	4.5843e+07	1.41555e+08	5.39888e+07	121315423	6.41106e+07	2.0927e+08	1.01959e+08	1.39808e+08	893658	1.27397e+08	1.21637e+08	105107447	129319931	1.28271e+08	1.19147e+06	3.80654e+08	1.24614e+08	3.88161e+07	8.21848e+07	1.08218e+08	1.13172e+08
1-Nitrosopiperidine@1.091-rp	2.71515e+07	2.34696e+07	1.41047e+07	1.55325e+07	1.99148e+07	2.6745e+07	2.2005e+07	5.11603e+07	3.41467e+07	5.23507e+07	2.77851e+07	1.63896e+07	4.39804e+07	2.21368e+07	2.12181e+07	1.44243e+07	1.28304e+07	3.64479e+07	2.2377e+07	6.16703e+07	2.53355e+07	4.43819e+07	2.78984e+07	6.77941e+07	47630.8	3.50603e+07	3.42606e+07	3.34598e+07	4.74341e+07	3.3529e+07	52740.9	9.81256e+07	6.91541e+06	3.05268e+06	1.75809e+07	3.56181e+07	2.80026e+07
114.57134@1.106-rp	3.67542e+06	2.91291e+06	2.0791e+06	2.00942e+06	3.24502e+06	4.45231e+06	2.24198e+06	8.80461e+06	3.18609e+06	4.12338e+06	4.08966e+06	3.18811e+06	2644575	2.30836e+06	2.4298e+06	1.69263e+06	973937	2.1705e+06	2.92811e+06	3.128e+06	3.35022e+06	1.89796e+06	3.15079e+06	6.60364e+06	51783.6	2.71658e+06	3.00279e+06	2.42624e+06	3.21066e+06	3.31736e+06	87289.8	1.15056e+07	820626	729624	1.89953e+06	2.0305e+06	2.04532e+06
114.57137@6.448-rp	112768	80100.2	136042	172332	190274	110050	105961	156077	399946	64034.2	118193	88315.1	2.15539e+06	118873	226324	435471	310999	96811.6	106179	144405	101576	89689	110028	126013	43000.4	460321	391096	403016	418807	458623	51155.5	166376	5.78998e+06	95748.5	213690	92032.2	99434.8
Maleamicacid@1.11-rp	1.24273e+08	1.65385e+08	5.45115e+07	7.25453e+07	1.03993e+08	1.0379e+08	3.66803e+08	601903749	5.11268e+08	5.33369e+08	4.88329e+08	4.92613e+08	6.48464e+08	1.87197e+08	1.96866e+08	3.65366e+08	1.70753e+08	5.57482e+08	2.51175e+08	4.26717e+08	2.92332e+08	4.79849e+08	4.23841e+08	5.57392e+08	1.51014e+06	3.97857e+08	3.85061e+08	3.35205e+08	4.04306e+08	3.80891e+08	2.17443e+06	8.90006e+08	3.19074e+08	376841810	3.51585e+08	3.74344e+08	4.16439e+08
115.02803@1.109-rp	1.27072e+07	1.29971e+07	9.00052e+06	8.19281e+06	1.15323e+07	1.49394e+07	1.10763e+07	1.047e+07	1.326e+07	8.68379e+06	1.27461e+07	9.10215e+06	1.37448e+07	2.15926e+07	1.3318e+07	1.59716e+07	1.81092e+07	1.14608e+07	1.91685e+07	2.38853e+07	1.42177e+07	1.70811e+07	2.07085e+07	1.91099e+07	13458	1.26624e+07	1.4447e+07	1.21511e+07	1.34272e+07	1.31768e+07	14350.3	7.81512e+06	7.5071e+06	6.22219e+06	1.23219e+07	1.1895e+07	1.43643e+07
1-Amino-2,4-imidazolidinedione@1.2-rp	2.23735e+06	2.33476e+06	6.06306e+06	3.23229e+06	2.15364e+06	2.74714e+06	1.77684e+06	1.22177e+06	2.16231e+06	1.87988e+06	2.62629e+06	2.64236e+06	2.07328e+06	4.10508e+06	4.09693e+06	1.86835e+06	3.65972e+06	3.27481e+06	1.51891e+06	1.55565e+06	2.95102e+06	1.53077e+06	1.7224e+06	1.65496e+06	38610.3	2.70808e+06	2.45972e+06	2.04664e+06	2.69181e+06	2.61211e+06	68102.6	1.44841e+06	1.76261e+06	2.6943e+06	1.96698e+06	1.45218e+06	2.22968e+06
Butylisothiocyanate@21.926-rp	165621	548252	827077	959164	589102	640827	1.05257e+06	368792	1.03808e+06	226327	1.84387e+06	1.65851e+06	1.20925e+06	1.27014e+06	376837	156825	60207.8	1.58399e+06	530081	1.08733e+06	475218	1.04193e+06	508846	550923	14711.3	619067	854839	645924	1.17501e+06	972597	15485	34618.6	16114.9	1.09542e+06	1.39924e+06	547409	455897
Proline@0.991-rp	1.30929e+06	866949	805617	986344	1.27643e+06	1.33972e+06	1.51831e+07	1.80696e+07	2.70329e+07	2.34626e+07	1.58863e+07	1.36221e+07	4.68973e+06	916495	774608	2.43577e+06	760851	3.56968e+06	7.23554e+06	1.92278e+07	2.1771e+06	1.40116e+07	1.35099e+07	1.0697e+07	1.19105e+06	9.93027e+06	9.19173e+06	8.4618e+06	9.90412e+06	1.09114e+07	1.8884e+06	2.74309e+07	1.40934e+07	6.88444e+06	7.50813e+06	1.95394e+07	8.93013e+06
Proline@1.162-rp	1.01e+08	1.62472e+08	3.55605e+07	5.92216e+07	8.39833e+07	9.18276e+07	2.01336e+08	3.45161e+08	2.40175e+08	4.68178e+08	2.24195e+08	2.2986e+08	5.63442e+08	9.12017e+07	1.44346e+08	2.32938e+08	1.5221e+08	3.14151e+08	1.1127e+08	2.25223e+08	1.38145e+08	2.83342e+08	1.94518e+08	2.94486e+08	656734	2.19004e+08	192780492	1.88397e+08	2.24091e+08	2.16435e+08	1.1025e+06	5.91122e+08	2.82894e+08	2.24544e+08	1.31137e+08	1.61276e+08	1.79216e+08
Proline@1.768-rp	163764	784430	558470	214681	175475	800684	1.15215e+06	1.18519e+07	573012	289511	386289	402938	5.27424e+07	2.90844e+07	4.39609e+07	2.54022e+07	4.52956e+07	3.39995e+07	571004	5.27883e+06	2.86643e+07	1.62765e+07	9.82837e+06	5.91162e+06	218662	8.47316e+06	8.56154e+06	8.03552e+06	9.1144e+06	8.90061e+06	33645	1.43488e+06	9.14242e+06	6.59297e+06	727915	840765	585631
L-Proline@3.706-rp	1.00819e+07	8.37772e+06	6.35451e+06	4.88588e+06	5.15297e+06	1.4736e+07	799842	2.35965e+06	2.22842e+06	2.42241e+06	872799	1.79435e+06	2.29489e+06	5.01336e+06	2.87139e+06	2.14733e+06	1.9275e+06	1.77086e+06	936613	694560	2.50436e+06	1.96411e+06	1.80997e+06	99715	825236	2.69067e+06	2.52066e+06	2.02493e+06	2.75877e+06	2.81962e+06	928680	2.9275e+06	2.36778e+06	1.16288e+06	2.5578e+06	702037	444493
115.06456@1.75-rp	1.26415e+06	3.73852e+06	4.77529e+06	4.31872e+06	7.8196e+06	5.78343e+06	1.01115e+07	3.30211e+07	8.85507e+06	1.87427e+07	9.68953e+06	7.68411e+06	8.61683e+06	4.78901e+06	1.00935e+07	3.65215e+06	2.00117e+06	5.04438e+06	4.25057e+06	9.90198e+06	5.47863e+06	1.00492e+07	5.78599e+06	7.84132e+06	26351.2	9.03018e+06	9.11338e+06	7.7952e+06	9.81345e+06	9.27027e+06	31320.8	2.31937e+07	3.67854e+06	2.91909e+06	1.14929e+07	1.21141e+07	8.39938e+06
115.09882@1.113-rp	4.0305e+06	2.11528e+06	3.05486e+06	4.45662e+06	5.55445e+06	4.50499e+06	3.23485e+06	6.92435e+06	7.19032e+06	2.36042e+07	1.1199e+07	1.21415e+07	601702	2.28198e+06	4.58079e+06	273881	164846	258466	659068	1.22398e+07	5.68875e+06	1.34319e+07	6.82561e+06	1.27808e+07	15426.9	8.14541e+06	8.35402e+06	6.15467e+06	7.69082e+06	7.2944e+06	19886.2	4.24089e+07	453791	224611	4.635e+06	1.23079e+07	4.52258e+06
n-Hexanamide@1.184-rp	3.8192e+07	3.17864e+07	2.87601e+07	2.61654e+07	3.2488e+07	3.60091e+07	1.65682e+07	4.38456e+07	3.70108e+07	2.79014e+07	4.45736e+07	2.93332e+07	1.62803e+07	3.93501e+07	2.70731e+07	1.62115e+07	2.87334e+07	1.51717e+07	2.8422e+07	4.58026e+07	3.8882e+07	1.89228e+07	2.70084e+07	3.19406e+07	67729.7	3.11255e+07	3.03899e+07	2.52042e+07	2.96226e+07	2.85085e+07	78624.4	2.77284e+07	2.83281e+07	1.037e+07	2.62954e+07	33178806	3.31481e+07
115.97861@6.156-rp	7.18313e+06	7.06412e+06	6.09304e+06	8.78401e+06	6.27029e+06	6.9017e+06	3.50265e+06	1.79297e+06	3.67136e+07	89515.1	1.556e+07	6.23532e+06	1.13799e+08	6.8994e+06	1.75788e+08	150032352	4.63673e+07	8.27459e+06	8.15631e+06	7.22921e+06	7.25553e+06	5.22872e+06	7.95986e+06	6.2139e+06	1.06671e+07	8.70214e+07	1.00493e+08	9.04818e+07	7.66308e+07	1.01052e+08	1.09464e+07	5.24489e+06	84022.6	75019.9	8.10372e+06	8.32322e+06	623332
115.97869@0.951-rp	8.62454e+07	5.43487e+07	1.88341e+07	1.04862e+07	1.82123e+07	5.93065e+07	4.49573e+07	2.30463e+08	9.25156e+07	2.34241e+08	6.83071e+07	3.86972e+06	1.65726e+07	3.2977e+07	5.94245e+07	2.38866e+07	3.00176e+07	1.08853e+07	2.16973e+08	2.35768e+08	7.18212e+07	4.80779e+07	2.00002e+08	4.19982e+08	4.23006e+07	9.52741e+07	1.01667e+08	7.47185e+07	1.09951e+08	1.11292e+08	5.90246e+07	1.25183e+08	3.83363e+07	9.56885e+06	3.26958e+07	2.17972e+08	9.2447e+07
Fumaricacid@1.11-rp	3.60143e+06	3.11905e+06	2.00227e+06	1.46404e+06	2.55561e+06	4.03008e+06	1.35735e+06	3.15439e+06	2.06552e+06	1.76129e+06	1.89443e+06	1.94391e+06	3.06581e+06	1.9055e+06	1.76817e+06	2.45712e+06	1.11112e+06	3.10394e+06	3.39821e+06	2.34664e+06	2.09877e+06	2.08641e+06	1.84137e+06	2.68491e+06	204710	2.62578e+06	1.8192e+06	2.56894e+06	2.55157e+06	2.52331e+06	218905	3.03524e+06	2.48627e+06	4.5047e+06	1.98245e+06	1.83754e+06	2.97692e+06
Fumaricacid@1.63-rp	4.65719e+06	3.37278e+06	1.31892e+06	1.96612e+06	6.91654e+06	2.82016e+06	3.92506e+06	9.75424e+06	4.31725e+06	5.41323e+06	4.80337e+06	7.194e+06	5.89316e+06	5.81134e+06	2.60569e+06	4.55126e+06	1.78195e+06	8.13988e+06	3.30494e+06	3.52852e+06	3.94251e+06	8.52196e+06	4.73114e+06	5.50318e+06	74128.8	5.18641e+06	6.02274e+06	5.19075e+06	5.65611e+06	5.24635e+06	99208.7	3.10926e+07	7.13952e+06	6.89744e+06	7.23675e+06	3.4689e+06	3.39776e+06
Fumaricacid@1.266-rp	1.66771e+07	1.23037e+07	8.69141e+06	7.77469e+06	1.05273e+07	1.72813e+07	7.60831e+06	2.28715e+07	1.18091e+07	1.69279e+07	1.16685e+07	1.00319e+07	7.74975e+06	6.97863e+06	4.68289e+06	6.58919e+06	4.69795e+06	6.35323e+06	1.10984e+07	1.08237e+07	9.26942e+06	1.13574e+07	9.26527e+06	1.38129e+07	354183	1.00055e+07	1.0816e+07	1.00129e+07	1.11618e+07	9.50868e+06	486746	3.27893e+07	1.45279e+07	1.21977e+07	1.15343e+07	9.95134e+06	9.50183e+06
2-oxovalericacid@1.179-rp	7.71509e+06	8.46892e+06	9.0478e+06	9.17219e+06	9.30337e+06	1.32423e+07	6.37924e+06	1.15068e+07	7.5793e+06	8.5907e+06	1.15496e+07	1.12019e+07	8.83965e+06	7.85927e+06	1.0345e+07	1.05552e+07	9.6649e+06	8.61783e+06	2.11619e+07	1.99743e+07	1.07794e+07	1.49003e+07	1.08955e+07	1.30174e+07	686336	1.13161e+07	1.07523e+07	1.09913e+07	1.10714e+07	1.36095e+07	1.15202e+06	1.20386e+07	8.68295e+06	7.46276e+06	7.21138e+06	5.11143e+06	1.05268e+07
116.04981@3.146-rp	1.5143e+06	2.33361e+06	438819	667598	616313	1.26987e+06	2.43635e+06	3.00868e+06	3.37801e+06	3.54819e+06	3.14054e+06	1.83468e+06	2.32312e+06	1.12859e+06	2.72745e+06	2.14558e+06	428912	1.96609e+06	1.18805e+06	2.91398e+06	1.20773e+06	2.20642e+06	1.66083e+06	1.79277e+06	19731.5	2.35669e+06	2.27447e+06	2.22632e+06	2.56664e+06	2.29957e+06	36945	4.95168e+06	496723	325029	1.9238e+06	1.70949e+06	1.79553e+06
116.06045@1.153-rp	171391	450887	110200	115771	153451	193632	547277	912636	580688	1.30763e+06	762276	643870	1.83639e+06	174497	459782	642616	396288	984949	313265	497229	290543	816028	482293	728775	14456.4	636591	544657	571964	553224	665767	17066.6	1.80369e+06	837390	589473	290804	381738	460398
1,2-cyclohexanediol@10.179-rp	748816	959478	1.26472e+06	877841	668561	459322	1.61516e+06	1.17125e+06	1.85188e+06	2.12375e+06	941060	1.09875e+06	2.55192e+06	1.58458e+06	1.08408e+06	1.27764e+06	1.17831e+07	2.41425e+06	538262	1.16173e+06	964865	920153	1.1972e+06	988777	313128	891495	908055	1.03185e+06	773141	797930	1.02485e+06	1.00315e+06	1.33341e+07	7.10549e+06	1.52391e+06	1.06632e+06	1.60122e+06
116.56882@0.984-rp	8.01296e+06	6.25139e+06	3.93142e+06	4.75398e+06	8.70773e+06	7.66061e+06	1.32977e+07	4.40795e+07	8.92671e+06	2.22215e+07	6.1209e+06	7.5432e+06	1.53417e+07	6.1896e+06	6.51535e+06	5.77889e+06	2.68092e+06	5.08837e+06	6.44948e+06	9.66086e+06	8.74828e+06	1.49782e+07	9.89943e+06	2.57765e+07	395048	1.42949e+07	1.43602e+07	1.1707e+07	1.68424e+07	1.32976e+07	619327	3.99952e+07	5.01873e+06	2.10391e+06	1.23723e+07	1.3144e+07	1.17503e+07
117.02758@0.938-rp	3.03837e+08	1.99203e+08	1.07746e+08	8.06741e+07	1.55741e+08	1.95624e+08	1.43139e+08	4.46572e+08	3.38418e+08	3.85218e+08	2.72211e+08	1.15447e+08	3.50696e+07	2.61084e+08	2.33727e+08	5.18897e+07	4.94335e+07	1.40792e+07	3.56923e+08	4.18327e+08	3.43773e+08	1.80123e+08	3.25256e+08	4.89102e+08	1.33791e+06	2.41175e+08	2.58788e+08	2.22733e+08	2.64986e+08	2.4799e+08	1.43094e+06	289894403	4.77704e+07	4.58893e+06	1.52389e+08	3.78005e+08	2.27433e+08
117.02847@0.943-rp	2.23212e+06	1.59565e+06	496024	607299	1.12952e+06	1.26033e+06	1.38136e+06	2.74538e+06	2.11431e+06	1.2225e+06	1.98389e+06	1.02423e+06	440044	2.00565e+06	1.66613e+06	692724	606350	323331	2.04063e+06	2.39752e+06	2.30378e+06	1.53283e+06	2.54578e+06	1.15113e+06	135444	2.00486e+06	1.80844e+06	1.56163e+06	1.89486e+06	1.84625e+06	200709	2.00738e+06	542950	129096	1.43949e+06	2.52947e+06	1.6498e+06
2-amino-3-oxobutanoicacid@1.415-rp	567151	685433	434642	5.32421e+06	4.69927e+06	853406	2.29116e+07	9.7391e+07	3.31075e+07	1.01836e+08	3.36508e+07	3.31785e+07	4.59761e+06	4.63727e+06	4.54691e+06	4.36031e+06	1.72736e+06	1.31146e+06	1.66349e+07	1.84925e+07	8.62516e+06	1.62226e+07	1.924e+07	1.86421e+07	301636	2.4079e+07	2.47673e+07	2.37759e+07	2.71902e+07	2.31558e+07	6.65625e+06	1.06502e+08	2.24862e+07	4.80823e+07	1.792e+07	8.32332e+07	3.76836e+07
Phenylacetonitrile@15.519-rp	142156	88192.6	248157	87545.4	52521.9	180367	141713	245935	412239	329568	439111	94493.7	297757	211165	1.29463e+06	562749	438474	249838	57930.4	127131	222050	246957	211807	161608	113536	260090	279676	242638	208145	278650	168009	354110	509842	515370	172856	266610	353161
Phenylacetonitrile@17.811-rp	156591	35611.8	52457	80397.2	86217.6	46676.6	179098	239895	563070	183647	233972	518558	81112	60086.2	552826	271068	189651	211694	72003.5	353707	51423.8	268693	201116	40933.8	60618.6	163286	135122	209850	163236	141073	60586	266750	263010	328108	84567.2	384614	256597
Phenylacetonitrile@1.995-rp	1.59635e+06	2.72275e+06	429265	826776	971517	1.13348e+06	5.07968e+06	8.53085e+06	3.4783e+06	7.00322e+06	2.84358e+06	2.41198e+06	1.45257e+07	1.36653e+06	3.02547e+06	5.14222e+06	2.36645e+06	5.06892e+06	1.50376e+06	3.51109e+06	1.72831e+06	7.31692e+06	2.56624e+06	2.89935e+06	45655.7	3.44345e+06	3.52051e+06	3.33845e+06	3.84862e+06	3.90642e+06	32315.5	1.36158e+07	4.66848e+06	2.31451e+06	3.04065e+06	2.97096e+06	3.66753e+06
Phenylacetonitrile@3.149-rp	4.27829e+07	5.91282e+07	1.23204e+07	1.68021e+07	1.49503e+07	2.67695e+07	6.18417e+07	7.37187e+07	8.06866e+07	8.74356e+07	7.30282e+07	4.24527e+07	5.5003e+07	2.58435e+07	6.81778e+07	5.1415e+07	8.31243e+06	4.47967e+07	3.24044e+07	7.78664e+07	3.2114e+07	5.83869e+07	4.35199e+07	4.44813e+07	78174.9	6.13175e+07	5.95768e+07	5.57845e+07	5.96731e+07	5.71986e+07	62628.9	1.28078e+08	1.40129e+07	8.94515e+06	4.9341e+07	5.26278e+07	4.81282e+07
Phenylacetonitrile@1.55-rp	3.21127e+06	3.22162e+06	1.75015e+06	1.88288e+06	2.23037e+06	2.23798e+06	4.03613e+06	7.76505e+06	4.55882e+06	6.77935e+06	3.25715e+06	2.95826e+06	1.18961e+07	2.92017e+06	3.99028e+06	6.98894e+06	3.81517e+06	5.89358e+06	1.85521e+06	3.95389e+06	3.01159e+06	6.69084e+06	3.16819e+06	3.37366e+06	46959.1	4.52045e+06	3.96522e+06	3.92277e+06	4.37411e+06	4.05898e+06	33469.6	1.24288e+07	5.74353e+06	3.36334e+06	3.01766e+06	2.94437e+06	3.70712e+06
Phenylacetonitrile@5.376-rp	44474.7	44237.3	116111	47824.4	44817.2	50544.1	602629	1.54979e+06	1.15972e+06	603004	479499	444674	135007	282415	163374	60066.6	171291	135258	501022	1.37978e+06	348882	383069	756506	646066	30122.4	393809	420891	426523	418732	343218	32558	527355	605050	131065	542541	1.0509e+06	677404
4-methylaminobutyricacid@1.194-rp	1.78214e+08	2.51192e+08	7.09644e+07	1.05964e+08	2.03113e+08	1.39148e+08	3.71615e+08	8.48917e+08	3.29092e+08	8.92351e+08	3.24019e+08	2.97652e+08	1298058373	1.9887e+08	281438815	4.18255e+08	3.10271e+08	7.52785e+08	2.04e+08	3.40976e+08	2.36475e+08	6.63744e+08	3.17632e+08	3.78611e+08	1.42319e+06	4.57053e+08	4.29786e+08	3.61206e+08	4.64452e+08	4.3916e+08	2.03616e+06	1225849145	497528138	4.93049e+08	2.80984e+08	3.50872e+08	3.13598e+08
4-methylaminobutyricacid@2.68-rp	837553	614349	981117	572418	817963	871014	385224	1.79217e+06	1.2075e+06	691445	1.1296e+06	951628	241884	594708	393054	222112	313986	243216	904886	1.69087e+06	1.02286e+06	493700	712980	1.06959e+06	53075.1	698780	822328	776276	657162	591754	33756	637314	535238	194251	423515	877856	566832
117.08025@1.224-rp	1.5761e+07	9.93102e+06	1.01987e+07	8.08141e+06	1.26688e+07	1.51671e+07	449695	537072	549758	3.73862e+06	6.89689e+06	2.42929e+06	2.42898e+06	1.75576e+06	1.78642e+06	506522	1.03245e+06	1.45537e+06	963981	306041	4.57311e+06	999263	296287	667108	11337.2	3.85866e+06	3.92881e+06	3.1998e+06	3.86952e+06	3.73894e+06	12951.8	591309	1.22643e+06	62896.8	257639	784615	1.86386e+06
117.57163@4.915-rp	5.35791e+06	2.73778e+06	4.63171e+06	5.13151e+06	7.24385e+06	5.25511e+06	65368.4	1.56593e+06	194963	1.36532e+06	1.49465e+06	3.27181e+06	71695.8	90716.3	66280.3	66760.7	73690.3	93213.5	1.9102e+06	749572	5.08701e+06	1.06426e+06	1.00586e+06	2.555e+06	74241.5	789393	738241	658603	763737	755302	92273.6	1.62642e+06	158993	64560.5	148420	983579	201048
117.57167@6.657-rp	284775	198480	270555	257277	326978	237446	327196	510578	1.214e+06	277094	466871	267424	8.94074e+06	213453	1.31021e+06	418658	642470	173163	243390	1.56436e+06	267721	2.22617e+06	1.8038e+06	303265	75250.3	3.86982e+06	5.09454e+06	4.53339e+06	4.6425e+06	4.01555e+06	93171.2	794015	290169	302910	4.03112e+06	1.01847e+06	391605
1-Chloro-1,2,2-trifluoroethane@1.05-rp	3.60887e+07	4.60325e+07	3.35785e+07	5.40078e+07	4.90213e+07	4.8811e+07	5.22653e+07	3.61137e+07	3.62843e+07	4.24295e+07	4.07068e+07	6.24339e+07	5.31441e+07	5.95119e+07	6.51681e+07	4.14742e+07	7.87352e+07	5.0054e+07	2.92504e+07	4.11085e+07	5.23265e+07	4.88069e+07	4.84527e+07	2.84355e+07	312081	4.88857e+07	4.731e+07	4.587e+07	5.12894e+07	4.44332e+07	396298	3.38366e+07	3.21242e+07	6.49822e+07	4.6865e+07	3.84197e+07	4.12571e+07
118.01167@6.108-rp	160236	167942	110442	85839.4	118334	111535	380164	122878	193457	55228	555219	163133	4.17353e+07	91695	9.29413e+06	2.98049e+07	5.93009e+07	142895	128052	155074	103124	135824	180596	161297	127224	1.50962e+06	915224	1.5194e+06	1.23415e+06	1.55349e+06	103987	129806	53522.4	47539.2	136509	242052	55296.5
118.01169@0.944-rp	535796606	3.48822e+08	1.8144e+08	1.44391e+08	2.71049e+08	3.46371e+08	2.59459e+08	7.36375e+08	5.73763e+08	5.89349e+08	4.82708e+08	2.20401e+08	7.10172e+07	4.59143e+08	4.0808e+08	1.04446e+08	9.95836e+07	3.43659e+07	6.06533e+08	6.98851e+08	5.88794e+08	3.1615e+08	5.78703e+08	7.79661e+08	2.65352e+06	4.20045e+08	4.46566e+08	3.74632e+08	4.62508e+08	441566817	2.93758e+06	4.92987e+08	9.21227e+07	1.36384e+07	2.73262e+08	4.30807e+08	4.03524e+08
2-ethoxy-2-oxoaceticacid@1.639-rp	1.25233e+08	6.07451e+07	4.59598e+07	7.70625e+07	3.65202e+08	1.32233e+08	9.04034e+07	3.65149e+08	1.40811e+08	2.50845e+08	1.3863e+08	149609912	1.16101e+08	8.14686e+07	6.36884e+07	7.63671e+07	7.41938e+07	8.84467e+07	8.5567e+07	1.18385e+08	6.32728e+07	1.29355e+08	1.26553e+08	8.71919e+07	5.72765e+06	114522814	1.40491e+08	1.44527e+08	1.51709e+08	126822836	9.34146e+06	2.68955e+08	1.50997e+08	1.84863e+08	8.89515e+07	1.70603e+08	1.2415e+08
4,5-Dicyanoimidazole@2.241-rp	8.3207e+06	2.32248e+06	4.78392e+06	4.956e+06	5.39362e+06	7.96368e+06	6.94766e+07	2.01243e+08	9.08952e+07	103862792	1.25939e+08	1.3783e+08	5.82447e+06	2.74878e+07	7.88108e+06	5.65846e+06	1.11795e+06	5.60234e+06	1.06334e+08	2.98126e+08	1.40891e+07	1.79099e+08	1.10978e+08	2.01628e+08	90476.4	1.00532e+08	9.94011e+07	9.41822e+07	101098355	1.07984e+08	127717	4.72317e+08	2.62357e+07	7.67845e+07	1.80314e+08	1.78192e+08	1.51398e+08
Coumarone@7.015-rp	156480	1.10363e+06	51654.2	136603	147029	163148	549569	118838	70099.9	136205	153531	70315.4	8.36925e+06	217397	672101	4.30433e+06	363667	86933.2	82530.2	102453	135171	90922.4	96691.5	75104.8	37138.9	534070	660911	441123	706306	576406	24117.2	144573	260979	209547	155793	83825.6	227102
Coumarone@8.556-rp	374194	222542	196829	288845	261581	287660	114547	194135	93787.2	183017	167127	95129.8	155496	2.87718e+06	250180	127103	6.3811e+06	3.4587e+06	127388	213543	223446	173360	130893	148300	65911.6	448603	423037	420758	463719	544318	34537.9	253948	322860	134554	400208	190917	175004
Coumarone@9.083-rp	4.04506e+06	4.49812e+06	2.95419e+06	2.59722e+06	4.24428e+06	3.98136e+06	441840	396906	451183	396732	381914	421774	311795	207679	2.99556e+06	165810	135238	178089	335745	526323	4.8873e+06	1.49533e+06	699278	426938	37362.4	1.49238e+06	1.63625e+06	1.44054e+06	1.44031e+06	1.41752e+06	748431	435008	1.33869e+06	423314	452076	411439	398391
Coumarone@4.409-rp	178504	53494.1	198833	88070.2	162048	180648	790028	621251	944921	892252	468138	270750	149489	121030	125362	99305.7	131130	123688	654625	986620	476262	497975	758717	987739	125324	432726	484359	447505	507432	471101	43997.8	761083	718893	583036	625113	1.00252e+06	969541
Coumarone@1.546-rp	7.9784e+07	1.46778e+08	2.62546e+07	4.61169e+07	4.32212e+07	5.1813e+07	2.43383e+08	4.1039e+08	2.16112e+08	364373859	1.8603e+08	1.55068e+08	6.78883e+08	6.906e+07	1.90532e+08	3.04167e+08	2.22291e+08	3.05382e+08	7.70706e+07	2.10854e+08	9.25693e+07	3.46017e+08	1.40778e+08	1.6011e+08	272178	2.13627e+08	2.06107e+08	194913777	2.17277e+08	2.01262e+08	378836	6.48882e+08	3.98877e+08	1.94688e+08	1.63258e+08	1.58714e+08	2.07713e+08
Coumarone@8.75-rp	728837	705189	2.63805e+06	884420	3.89895e+06	431868	196397	317894	227453	245981	403751	333395	286579	2.87718e+06	753396	199120	292252	3.4587e+06	138661	187747	530056	663930	390657	281581	34499.1	448902	528362	409752	469053	476843	45775.6	345336	611172	434180	401432	269484	265253
2-hydroxy-2-methylbutyricacid@2.594-rp	289964	124845	304270	197621	182696	119789	3.88514e+06	2.78717e+07	1.32977e+07	2.15166e+07	5.86308e+06	1.60469e+07	2.07439e+06	1.7244e+06	2.54538e+06	889380	860855	1.30404e+06	1.31408e+07	1.32116e+07	1.59479e+07	1.07298e+07	1.41885e+07	1.40418e+07	163783	7.07207e+06	6.41835e+06	7.48355e+06	7.5492e+06	7.3829e+06	255035	1.08865e+07	1.60482e+06	3.50653e+06	3.06598e+06	1.07303e+07	6.30473e+06
119.01247@0.944-rp	6.54358e+07	4.41101e+07	2.25453e+07	1.98299e+07	3.50712e+07	4.34615e+07	3.39233e+07	9.38773e+07	7.26684e+07	6.55086e+07	5.96414e+07	2.57265e+07	8.88808e+06	5.63807e+07	5.28256e+07	1.38378e+07	1.25282e+07	4.02542e+06	7.77635e+07	8.71139e+07	7.4761e+07	3.96808e+07	7.65212e+07	8.93153e+07	455204	5.44424e+07	5.9045e+07	3.91617e+07	5.981e+07	5.60166e+07	674549	5.88764e+07	1.12131e+07	1.47864e+06	3.48369e+07	7.78663e+07	5.05549e+07
119.01247@6.112-rp	156033	129663	104197	136763	131679	177703	115903	195775	96084.8	87281.9	325233	134397	1.01396e+07	143227	1.95383e+06	7.68362e+06	1.90206e+07	132162	115233	130881	105082	126827	112491	137306	67896.6	341726	328921	287280	378188	432078	82011	206813	84925.6	74191.9	139579	123183	87722.3
Benzoxazole@4.465-rp	107144	238964	175942	112911	125699	142540	254771	673114	1.05457e+06	196495	616397	475541	101229	91496.2	114431	85307.1	91344	76653.4	220925	349847	205673	155855	217202	276979	40692.3	282479	275955	260085	312803	316813	43076.4	387237	655359	113841	311868	304179	603585
119.05341@1.093-rp	8.46236e+06	4.99552e+06	5.72782e+06	3.07716e+06	5.64181e+06	6.88603e+06	2.12525e+06	4.68573e+06	4.00755e+06	4.33447e+06	6.47858e+06	7.25976e+06	9.97087e+06	4.08416e+06	1.74699e+06	4.04734e+06	1.35399e+06	3.90222e+06	2.90408e+06	8.239e+06	1.26115e+07	4.99394e+06	5.54051e+06	5.52997e+06	39613.1	3.92573e+06	2.9969e+06	3.15691e+06	5.27473e+06	4.11098e+06	61148.5	7.57596e+06	2.87573e+06	2.0034e+06	2.70333e+06	2.815e+06	3.28984e+06
119.05697@1.094-rp	1.84437e+06	1.66456e+06	287754	251476	786446	964208	450096	457173	488621	1.86453e+06	1.58853e+06	777108	406107	2.82727e+06	1.18071e+06	260673	240556	361535	1.21498e+06	1.03633e+06	3.32235e+06	1.16683e+06	1.72304e+06	1.63819e+06	16168.7	1.33763e+06	1.46293e+06	1.46502e+06	1.55157e+06	1.27248e+06	24418.1	531281	356216	283417	387737	964161	326297
2-methylserine@1.567-rp	1.71059e+06	2.91062e+06	1.28762e+06	2.23331e+06	1.13765e+06	1.28857e+06	5.0988e+06	6.5769e+06	409570	7.95268e+06	5.7303e+06	5.43615e+06	3.50618e+06	2.91726e+06	3.60179e+06	3.00102e+06	2.74669e+06	3.39264e+06	3.13402e+06	4.00565e+06	4.36094e+06	2.82662e+06	3.4578e+06	4.47289e+06	21209.8	4.28926e+06	4.18227e+06	4.60561e+06	5.09321e+06	3.99719e+06	38429.7	8.07744e+06	5.53316e+06	7.7604e+06	5.38999e+06	8.48467e+06	5.03634e+06
2-methylserine@1.106-rp	4.0702e+07	7.49408e+07	1.70046e+07	2.27502e+07	2.75673e+07	3.38745e+07	1.03648e+08	1.44195e+08	1.1556e+08	1.39324e+08	9.89633e+07	8.03622e+07	2.28812e+08	4.73296e+07	6.52188e+07	1.32389e+08	6.98236e+07	148858524	6.85752e+07	1.16884e+08	6.33171e+07	1.39337e+08	9.21844e+07	1.46454e+08	887855	1.05382e+08	9.91005e+07	8.90419e+07	1.10488e+08	9.99927e+07	1.2139e+06	2.57231e+08	115169084	8.09712e+07	7.4944e+07	9.28232e+07	9.84698e+07
119.05939@1.114-rp	3.96441e+06	2.2946e+06	3.52384e+06	4.51654e+06	6.83461e+06	5.49803e+06	532846	2.56343e+06	1.26139e+06	1.68026e+06	1.32026e+06	1.29192e+06	1.93907e+06	2.27794e+06	1.22922e+06	1.11533e+06	1.33032e+06	1.86682e+06	1.2595e+06	1.67004e+06	2.65197e+06	759236	2.49116e+06	2.66536e+06	28995.5	1.4403e+06	2.0746e+06	1.45366e+06	1.95404e+06	1.65769e+06	37350.4	1.41502e+06	1.08512e+06	3.91038e+06	1.02065e+06	881137	955225
Indoline@3.458-rp	1.47345e+06	596098	1.18234e+06	842391	1.41999e+06	1.27337e+06	741374	1.84246e+06	483689	351228	395940	661396	868776	299470	528544	583196	415304	741333	120163	568867	754382	782703	473175	640264	34963	326775	329470	344529	327919	367172	31987.4	1.50396e+06	584427	531631	538168	536309	628074
Indoline@6.546-rp	180364	644987	156730	129351	162857	155119	378025	3.11524e+06	921735	534382	505665	688130	2.35673e+06	648217	2.77801e+06	434066	240180	1.77958e+06	399239	1.09359e+06	127947	1.03014e+06	530517	489924	31172.8	4.03572e+06	3.93439e+06	3.65474e+06	4.75209e+06	4.3795e+06	37079.3	2.34567e+06	197939	157173	6.83807e+06	1.03541e+06	532723
Indoline@8.195-rp	615239	884523	400294	463398	612534	885658	801197	3.33422e+06	1.54356e+06	1.57864e+06	1.21014e+06	1.18189e+06	1.27065e+06	289961	281975	525046	1.14293e+07	255468	1.46563e+06	1.37825e+06	1.15773e+06	999277	1.09833e+06	1.25242e+06	23418.3	491751	585591	534638	558661	530849	27451	2.20938e+06	401620	6.09591e+06	430374	1.64739e+06	1.13097e+06
Indoline@7.174-rp	157640	537656	1.36183e+06	1.00794e+06	1.50503e+06	1.34807e+06	1.20892e+07	1.5708e+06	1.468e+06	542309	5.45031e+06	2.27658e+06	2.58338e+06	539556	852332	3.83491e+06	661718	673886	1.51871e+06	1.86735e+06	1.33404e+06	657025	233873	986099	25696.1	2.82899e+06	3.25421e+06	3.0661e+06	4.11306e+06	3.54448e+06	29178.3	1.58362e+06	3.77118e+06	8.29767e+06	2.51347e+06	855513	385116
Indoline@4.54-rp	1.31668e+06	3.21451e+06	535653	723756	698394	2.39132e+06	644038	571702	611704	2.45111e+06	2.90942e+06	4.67177e+06	1.32161e+06	227571	298802	217421	162541	242713	304357	285909	596761	693681	406098	539012	44523.9	1.12009e+06	1.09026e+06	1.06482e+06	1.05253e+06	1.04852e+06	47952.2	1.4789e+06	1.07364e+06	785551	663174	238649	1.82106e+06
Indoline@7.007-rp	1.10665e+06	551217	1.36183e+06	1.00794e+06	1.50503e+06	1.34807e+06	283496	1.64688e+06	1.51524e+06	563586	5.45031e+06	2.27658e+06	6.45147e+06	580393	931361	7.05809e+06	752966	715333	1.51871e+06	1.83772e+06	1.36708e+06	782033	1.19307e+06	1.00094e+06	28764.8	2.02618e+06	2.13923e+06	3.14884e+06	3.87167e+06	3.28709e+06	32698.5	1.75749e+06	3.91815e+06	406746	3.06457e+06	919108	614002
Indoline@1.996-rp	161171757	2.54245e+08	6.07173e+07	1.0837e+08	104770276	9.95289e+07	3.73413e+08	7.85645e+08	4.00102e+08	6.65166e+08	3.05616e+08	2.82181e+08	1189652715	1.48201e+08	3.5184e+08	5.63619e+08	2.63774e+08	4.77828e+08	1.53381e+08	3.74588e+08	1.78234e+08	6.91649e+08	2.79555e+08	2.80019e+08	368077	3.86004e+08	3.92312e+08	3.48772e+08	4.21341e+08	3.58266e+08	377600	1100436666	5.12946e+08	2.90456e+08	308428544	3.04159e+08	3.57049e+08
506020@1.072-rp	2.70791e+06	8.14646e+06	3.67807e+06	2.36446e+06	4.23872e+06	5.18917e+06	4.00928e+06	3.70676e+06	4.72577e+06	4.57978e+06	4.11571e+06	6.05245e+06	1.18838e+07	2.90441e+06	1.33118e+06	2.75396e+06	2.41838e+06	9.77039e+06	3.33863e+06	2.59422e+06	5.47772e+06	5.11679e+06	3.1649e+06	9.93571e+06	74776.8	3.53083e+06	3.4647e+06	3.57757e+06	4.34609e+06	3.97176e+06	89103.4	7.83162e+06	1.23691e+06	6.60164e+06	4.79197e+06	1.66932e+06	3.72614e+06
119.94945@1.014-rp	6.84446e+06	4.00521e+06	2.82121e+06	6.42402e+06	4.32593e+06	6.24887e+06	2.54318e+06	4.83476e+06	6.92429e+06	2.13324e+06	3.3304e+06	2.80515e+06	3.08083e+06	4.43162e+06	8.54183e+06	5.24617e+06	1.28719e+07	3.06249e+06	2.28784e+06	2.45411e+06	3.99765e+06	2.16679e+06	3.27494e+06	1.66879e+06	224187	4.52773e+06	4.88592e+06	4.45805e+06	5.22467e+06	5.26942e+06	218481	2.59074e+06	7.72186e+06	1.59785e+06	2.19108e+06	3.13577e+06	5.37538e+06
119.95899@1.038-rp	5.42251e+06	8.19871e+06	5.60544e+06	8.28919e+06	1.03294e+07	7.55884e+06	1.69865e+07	8.96096e+06	8.78005e+06	1.0342e+07	1.37869e+07	1.90281e+07	2.45698e+07	1.1011e+07	7.59064e+06	2.12973e+07	1.79235e+07	2.0691e+07	9.11914e+06	6.7235e+06	8.34093e+06	1.40671e+07	1.19514e+07	7.12176e+06	51721.4	1.44291e+07	1.2553e+07	1.07568e+07	1.39031e+07	1.37069e+07	107529	1.66145e+07	2.40829e+07	2.48518e+07	1.36559e+07	9.73507e+06	1.34947e+07
119.97149@0.956-rp	6.35397e+06	3.3015e+06	1.64901e+06	1.87313e+06	2.40654e+06	4.59471e+06	2.82301e+06	1.95781e+07	8.29134e+06	2.09002e+07	4.58355e+06	1.22944e+06	970848	2.71508e+06	3.87617e+06	1.5101e+06	1.82548e+06	868624	1.61751e+07	1.79775e+07	5.51762e+06	3.63053e+06	1.49215e+07	2.98319e+07	2.43849e+06	6.64602e+06	7.45828e+06	6.62576e+06	7.48922e+06	6.96363e+06	3.4685e+06	8.73466e+06	2.47895e+06	715829	2.56805e+06	1.51514e+07	6.22808e+06
120.00482@1.065-rp	728400	668896	606809	729583	695982	676660	815412	1.2289e+07	3.81207e+06	5.39573e+06	1.28227e+06	682218	771700	611234	603580	711753	696847	722013	2.08968e+06	8.09704e+06	676911	759617	3.79259e+06	1.16641e+07	63523.6	1.8924e+06	2.05989e+06	1.51169e+06	1.88091e+06	1.37905e+06	50661.7	2.96359e+06	684287	635099	1.35029e+06	6.44948e+06	2.21415e+06
120.00921@0.942-rp	9.04978e+07	5.47081e+07	2.89319e+07	2.24e+07	4.60207e+07	5.53734e+07	4.14336e+07	1.2015e+08	9.06831e+07	8.45469e+07	7.61478e+07	3.39892e+07	1.01998e+07	7.5261e+07	6.42904e+07	1.72084e+07	1.56878e+07	5.49367e+06	9.81734e+07	1.09763e+08	9.76385e+07	4.9443e+07	9.40222e+07	1.09876e+08	727439	6.76967e+07	7.08074e+07	5.21377e+07	7.45392e+07	7.02634e+07	907046	8.22789e+07	1.45273e+07	2.04772e+06	4.34959e+07	1.0474e+08	6.1988e+07
6-(Oxomethylene)-2,4-cyclohexadien-1-one@4.343-rp	586775	577119	3.36201e+06	1.18368e+06	460758	695284	2.14342e+06	1.33268e+06	3.20447e+06	2.73375e+06	1.21903e+06	785460	105280	349740	138545	349802	370459	95375.3	1.03487e+06	1.6522e+06	2.33032e+06	1.85749e+06	1.39548e+06	1.06925e+06	338695	1.50143e+06	1.50258e+06	1.38665e+06	1.49417e+06	1.33778e+06	339781	686015	1.11722e+06	1.23819e+06	1.86231e+06	498190	645087
120.03174@1.54-rp	3.35016e+06	2.14671e+06	2.35632e+06	1.7246e+06	1.94146e+06	3.26175e+06	804878	1.46252e+06	966870	859066	876569	599619	968737	898955	1.23235e+06	1.36089e+06	1.73742e+06	1.16551e+06	972133	834675	2.1722e+06	647618	963803	1.77659e+06	53009.1	1.29598e+06	1.05645e+06	1.00894e+06	1.15048e+06	509249	87380.9	1.07284e+06	1.45646e+06	694130	1.32867e+06	788903	555408
2-hydroxynicotinonitrile@1.521-rp	9.53774e+06	1.31977e+07	8.65898e+06	6.0954e+06	9.39242e+06	3.62491e+07	5.73318e+06	7.78401e+06	6.79043e+06	3.2393e+06	5.15397e+06	4.17983e+06	4.33654e+06	3.86288e+07	2.58584e+07	9.80248e+06	1.8836e+07	1.17021e+07	4.25903e+06	6.93703e+06	1.04386e+07	2.42627e+06	3.34523e+06	3.95555e+07	215627	9.90485e+06	9.29681e+06	8.77345e+06	1.04249e+07	1.01009e+07	299405	7.06689e+06	9.70946e+06	1.25354e+07	1.85349e+07	5.93532e+06	6.13997e+06
Erythrose@1.266-rp	2.40959e+06	1.73212e+06	1.86105e+06	1.84407e+06	2.20112e+06	2.63744e+06	3.96316e+06	7.38992e+06	6.70229e+06	1.09109e+07	5.13665e+06	6.22281e+06	3.74682e+06	4.2228e+06	7.3379e+06	2.76666e+06	2.64476e+06	3.21648e+06	7.52618e+06	1.02485e+07	8.99871e+06	6.20428e+06	9.29853e+06	1.13973e+07	91716.6	5.22215e+06	4.67308e+06	5.09147e+06	5.6156e+06	5.18479e+06	125408	6.2853e+06	4.76178e+06	2.47157e+06	3.25193e+06	6.70276e+06	4.25157e+06
4-hydroxystyrene@4.125-rp	70120.8	50477.4	53058.8	50041	65722.5	71492	19717.8	70889.1	55868.7	20895.3	48074.5	40507.5	419918	469852	551352	804535	452270	327770	44187	72663.6	119314	43558.6	58850.1	58586.9	17205.7	59096.7	55880.7	64850.9	56004.6	34273.3	17843.5	20209.6	21495.5	18481.1	30936.8	18818.2	21306.9
4-hydroxystyrene@2.012-rp	178706	287631	44900.5	98494.5	130242	119237	414376	807029	409948	919386	338284	291430	1.60057e+06	200824	384443	618774	250055	577173	164011	407873	186227	768313	336096	344254	14091.7	401647	386523	435088	394405	401138	14958.4	1.63263e+06	563603	241762	366466	428238	443551
4-hydroxystyrene@4.427-rp	65376.2	54355.9	70709	51287.4	58911.3	63562.1	1.53861e+06	1.82605e+06	2.02191e+06	1.96836e+06	994216	668214	41609.2	52448.3	28861.3	26553.6	29576.1	28325.2	1.12377e+06	2.31221e+06	1.05421e+06	1.06137e+06	1.51185e+06	1.90678e+06	24946.9	1.19073e+06	939863	1.05427e+06	1.08863e+06	985580	26146.1	2.02521e+06	1.18783e+06	1.077e+06	1.25161e+06	2.02829e+06	1.75269e+06
4-hydroxystyrene@6.547-rp	267551	203461	31501.9	28756.2	168233	251291	91889	1.12482e+06	157580	74559.8	55336.3	59668.7	789982	1.4499e+06	1.15262e+06	1.45986e+06	2.02086e+06	868812	661437	1.17742e+06	574853	23805.3	741662	616653	13115.5	357125	374721	366001	346229	391553	14397.4	103418	121984	104116	305228	225137	155149
4-hydroxystyrene@9.133-rp	358472	58153	80481.4	76269.8	79844.8	80769.1	177889	355401	443201	597911	1.25369e+06	1.09616e+06	39992.6	65013.5	39362.6	36176.5	41639.7	40168	1.10536e+06	390365	125716	390621	513220	240183	275392	2.01464e+06	2.1571e+06	1.97784e+06	1.93467e+06	1.18586e+06	170826	453823	300281	478689	677864	356696	277027
4-hydroxystyrene@1.545-rp	2.58889e+06	4.50931e+06	1.09506e+06	1.79734e+06	1.76532e+06	1.76877e+06	7.19521e+06	1.28505e+07	8.34416e+06	1.12413e+07	5.92223e+06	5.27425e+06	2.08555e+07	2.23593e+06	6.7326e+06	1.04217e+07	6.78394e+06	9.49576e+06	2.88228e+06	6.89228e+06	3.03007e+06	1.06825e+07	4.417e+06	6.72076e+06	339332	6.91731e+06	6.53216e+06	6.6159e+06	6.75687e+06	6.3865e+06	377596	1.92854e+07	1.18432e+07	6.76582e+06	5.44391e+06	5.95551e+06	8.6129e+06
4-hydroxystyrene@7.929-rp	2.40129e+06	1.60341e+06	4.88072e+06	2.16168e+06	1.35799e+06	2.48215e+06	3.7331e+06	1.13798e+07	4.91024e+06	6.56855e+06	7.12791e+06	1.13737e+07	6.97459e+06	7.12314e+06	1.33169e+07	9.30792e+06	7.14067e+06	1.13124e+07	4.57336e+06	6.86331e+06	3.7904e+06	5.28162e+06	7.43702e+06	1.07855e+07	110742	2.99369e+06	3.0497e+06	3.25903e+06	3.01329e+06	3.03473e+06	160320	8.52406e+06	1.88904e+06	5.35528e+06	7.27127e+06	9.31261e+06	5.69117e+06
4-hydroxystyrene@8.611-rp	59736	48561.7	57809.7	52123.5	138404	75606.6	41265.5	52559.5	40005.3	47263	49080.1	55890.6	82592.1	1.03531e+06	119633	53832.3	52725	141045	1.41242e+06	1.88223e+06	5.15487e+06	58724.3	3.20525e+06	3.5478e+06	16543.6	5.49238e+06	5.2011e+06	4.91451e+06	5.00751e+06	4.61014e+06	18484.8	50887.9	70729.3	58065	5.87176e+06	79895.8	4.68938e+06
4-hydroxystyrene@7.678-rp	2.10475e+06	1.3383e+06	4.62049e+06	1.47852e+06	1.00622e+06	2.13877e+06	3.44425e+06	2.48182e+06	4.95549e+06	3.12753e+06	2.12279e+06	1.37189e+06	32622.3	40186.7	34427.7	27556.3	61178.5	27920.5	2.13291e+06	148678	1.50891e+06	1.94569e+06	2.12894e+06	2.28297e+06	14529.4	746672	724953	664415	867793	852246	15454.2	210488	456791	395604	1.15129e+06	210439	265814
4-hydroxystyrene@7.333-rp	141859	315815	342369	297426	320131	335626	1.67486e+06	4.65976e+06	5.27217e+06	5.35597e+06	3.21488e+06	2.48813e+06	401676	366439	131824	374693	298066	494940	424613	113321	369692	323469	311319	315320	32283	1.62258e+06	1.47806e+06	1.50347e+06	1.84996e+06	1.77548e+06	324948	262346	358497	320447	502576	330680	348033
4-hydroxystyrene@6.826-rp	841969	261631	680520	659134	290976	299842	1.20745e+06	1.82897e+06	1.70704e+06	1.04075e+06	1.17583e+06	993647	3.09739e+06	3.98842e+06	3.94648e+06	3.60806e+06	2.88603e+06	4.10006e+06	739875	3.55242e+06	805210	1.47811e+06	1.52106e+06	614896	586495	3.43914e+07	3.71642e+07	3.52261e+07	3.67735e+07	3.54646e+07	664910	1.0234e+06	911103	604839	1.76737e+07	1.20022e+06	600616
4-hydroxystyrene@6.107-rp	175821	137056	168701	121668	108952	130937	176176	172776	238867	162973	68524.7	127606	2.32073e+07	2.98793e+07	2.77291e+07	1.11682e+07	4.60377e+06	2.94135e+07	168452	200853	143504	128447	136619	118393	121834	482535	452112	450516	487951	399328	130287	180659	155306	118372	754063	151226	153171
4-hydroxystyrene@7.124-rp	718680	305292	602767	923862	334614	609239	2.10273e+07	8.32731e+07	4.84623e+07	9.31732e+07	4.02477e+07	4.36257e+07	1.58395e+06	1.0344e+06	674592	779297	1.10005e+06	1.62363e+06	6.66284e+07	5.86314e+07	1.03838e+08	7.30055e+07	7.76407e+07	7.18658e+07	608281	971441	2.66234e+06	2.75419e+06	2.62534e+06	2.58558e+06	594925	6.15846e+07	8.14577e+06	1.73496e+07	1.72475e+07	5.41833e+07	2.86341e+07
120.06475@1.177-rp	627002	690035	490418	843762	757873	606804	478573	367061	577549	246813	503078	759794	392265	558806	557177	406247	697254	664507	292447	723705	553756	498135	783187	1.07742e+06	33793	466086	523047	424130	690414	548670	33802.5	279384	408766	478877	464096	654845	512892
Cumene@8.247-rp	65335.6	61365.7	115760	53539.8	64952.5	78756.4	108682	109820	125375	117944	128136	133991	166110	179240	50937.9	156889	105323	152397	141138	91142.2	153903	108819	126555	120600	116810	576862	533862	753513	811627	698204	231587	124095	284003	99508.8	2.46536e+06	110299	133273
120.59511@7.651-rp	98077.9	224956	52309	55924.9	63283.3	72782.7	474010	162522	90702.7	1.61508e+06	124140	71688.2	170910	191341	125733	112374	261349	99542.6	56714.4	96842.6	81365.7	86131.1	76274.1	76237.6	28159.8	164085	171158	178702	144678	204501	32204.9	269769	266159	145956	85750.9	85696.5	100125
2IMH4383Z4@2.662-rp	1.7109e+07	2.70186e+07	2.72133e+07	4.40782e+07	1.70269e+07	4.49512e+07	1.56279e+07	977006	2.4419e+07	1.04318e+06	1.69661e+07	6.54584e+06	5.15199e+06	2.72888e+07	1.52237e+07	826274	7.72217e+06	6.81538e+06	5.39527e+06	2.18533e+07	2.17827e+07	9.67441e+06	9.85763e+06	1.0074e+07	55212.6	1.3542e+07	1.35842e+07	1.31912e+07	1.23168e+07	1.03284e+07	68051.1	102635	122273	4.04039e+06	2.3119e+07	7.19872e+06	6.20375e+06
aminoazobenzene@6.717-rp	247486	271105	169158	147409	197109	222279	282732	458276	847063	243057	431061	266694	9.3568e+06	258256	1.77708e+06	4.83107e+06	614833	216363	200077	250927	190818	238300	308570	212614	149554	1.45589e+06	1.71703e+06	1.25184e+06	1.63399e+06	1.58052e+06	217081	342946	1.47968e+06	1.56879e+06	2.71973e+06	231720	338388
121.07519@1.091-rp	640778	270343	364244	952001	259372	499346	100026	442501	137582	237257	209009	148983	211314	164891	97034	116221	185638	140957	135759	208881	222797	136838	198165	165081	8413.22	228608	147644	131695	230740	199386	10845.2	379651	185354	122494	105153	158563	169786
121.53841@6.316-rp	2.24314e+06	129271	62629.4	134643	146323	2.59322e+06	80328.1	58017	32130.1	51903.8	57086.7	40801.5	91881.1	81887.4	37420.2	75020.5	71418.4	34505.6	29035.8	37205.9	52143.9	69158.9	30602.2	36611.3	18280.7	441881	551003	381173	433371	448473	20428.8	52087.5	64022	60647.6	181535	31616.3	26176.3
121.53847@6.572-rp	2.24314e+06	1.64676e+06	1.59528e+06	1.78512e+06	2.48877e+06	2.59322e+06	69518.5	295374	104703	702283	943827	534361	168332	62537.8	61883.5	73146.5	168342	49610.8	376925	109208	1.44917e+06	341207	256390	232503	21451.1	2.55847e+06	2.20366e+06	2.30155e+06	2.8738e+06	2.65442e+06	25988.9	318833	109547	390398	106168	187516	331399
121.5399@6.302-rp	169440	472155	268524	307870	461335	301959	532440	187319	358092	42422.1	1.15104e+06	301966	7.49861e+06	186346	3.4207e+06	4.70992e+06	464123	1.8627e+06	397431	252509	404565	417067	626315	474091	201793	1.30599e+06	2.69045e+06	2.65084e+06	2.83013e+06	3.17241e+06	416104	199952	42939.4	37632.6	516022	234755	275105
121.56699@1.1-rp	5.20908e+07	2.80275e+07	3.386e+07	4.07722e+07	3.42939e+07	4.45721e+07	5.33187e+06	1.65102e+07	1.02921e+07	2.18964e+07	1.90241e+07	1.15457e+07	8.66966e+06	1.49964e+07	9.88738e+06	5.21886e+06	7.32038e+06	7.87055e+06	1.39666e+07	1.64941e+07	2.71087e+07	9.36003e+06	1.27935e+07	2.22273e+07	63851.6	1.58126e+07	1.58144e+07	1.45581e+07	2.09923e+07	1.62716e+07	91214.5	9.5821e+06	4.43556e+06	5.15687e+06	8.04256e+06	9.49124e+06	7.52472e+06
121.57921@1.095-rp	3.28405e+06	2.00799e+06	1.61084e+06	1.97413e+06	3.13389e+06	3.53223e+06	5.64401e+06	2.66939e+07	4.37406e+06	1.99973e+07	5.56345e+06	7.50955e+06	1.4486e+06	2.33715e+06	2.08285e+06	896393	621843	914788	3.83206e+06	6.77336e+06	3.76538e+06	5.86571e+06	5.41583e+06	1.20416e+07	41796.4	5.38266e+06	5.78364e+06	5.31593e+06	6.69719e+06	5.72656e+06	60565.5	3.0636e+07	1.16644e+06	698325	4.80261e+06	8.18784e+06	4.63267e+06
121.93457@6.121-rp	1.07876e+06	1.53847e+06	958554	1.10303e+06	1.02322e+06	1.05545e+06	736744	1.0927e+06	3.4837e+06	243098	1.00962e+07	1.02656e+06	2.38062e+08	1.15691e+06	3.87958e+07	1.00317e+08	6.64672e+07	1.32449e+06	1.00692e+06	1.4016e+06	989270	1.01832e+06	1.27442e+06	1.11248e+06	1.15814e+06	1.22998e+07	1.32777e+07	1.20747e+07	1.06441e+07	1.3525e+07	2.57893e+06	1.08716e+06	175724	213919	1.41535e+06	1.23187e+06	207293
[truncated: 24,488 more rows]

## Sheet: AreaQCCorr
	ileon-694-ATB_89	ileon-691-ATB_86	ileon-688-ATB_83	ileon-686-ATB_81	ileon-692-ATB_87	ileon-690-ATB_85	ileon-669-FMT_64	ileon-678-FMT_73	ileon-682-FMT_77	ileon-683-FMT_78	ileon-670-FMT_65	ileon-666-FMT_61	ileon-674-FMT-AKK_69	ileon-672-FMT-AKK_67	ileon-679-FMT-AKK_74	ileon-680-FMT-AKK_75	ileon-675-FMT-AKK_70	ileon-668-FMT-AKK_63	ileon-671-FMT-AKK-Pas_66	ileon-677-FMT-AKK-Pas_72	ileon-673-FMT-AKK-Pas_68	ileon-676-FMT-AKK-Pas_71	ileon-681-FMT-AKK-Pas_76	ileon-667-FMT-AKK-Pas_62	Bl_matrice-colon_3c	QC_ileon_5e	QC_ileon_5d	QC_ileon_5c	QC_ileon_5b	QC_ileon_5a	Bl_matrice-colon_3b	ileon-695-SPF_90	ileon-693-SPF_88	ileon-687-SPF_82	ileon-689-SPF_84	ileon-685-SPF_80	ileon-684-SPF_79
[truncated: 24,840 more rows]

[truncated: 2 more sheets: FoldChangeLog2, pvalue]
