# Supplementary material for: Oral administration of Akkermansia muciniphila elevates systemic antiaging and anticancer metabolites
Source: Aging (Albany NY). 2021 Mar 2;13(5):6375–405. doi: 10.18632/aging.202739 (PMC7993698; doi:10.18632/aging.202739)
Supplement: Supplementary Table 6 [file aging-13-202739-s007.xlsx]

## Sheet: SampleInfos
Supplementary Table 6. Related to Figures 5, 6. Metabolic signature obtained through untargeted metabolomic analysis from COLON samples from mice treated with FMT, Akk or with Akk-past (versus PBS or continuous ATB).
Sid	sType	Grp	Color
colon-686-ATB_81	Sa	ATB	#FB6A4A
colon-688-ATB_83	Sa	ATB	#FB6A4A
colon-690-ATB_85	Sa	ATB	#FB6A4A
colon-691-ATB_86	Sa	ATB	#FB6A4A
colon-692-ATB_87	Sa	ATB	#FB6A4A
colon-694-ATB_89	Sa	ATB	#FB6A4A
colon-666-FMT_61	Sa	FMT	#9E9AC8
colon-669-FMT_64	Sa	FMT	#9E9AC8
colon-670-FMT_65	Sa	FMT	#9E9AC8
colon-678-FMT_73	Sa	FMT	#9E9AC8
colon-682-FMT_77	Sa	FMT	#9E9AC8
colon-683-FMT_78	Sa	FMT	#9E9AC8
colon-668-FMT-AKK_63	Sa	FMT-AKK	#7960AB
colon-672-FMT-AKK_67	Sa	FMT-AKK	#7960AB
colon-674-FMT-AKK_69	Sa	FMT-AKK	#7960AB
colon-675-FMT-AKK_70	Sa	FMT-AKK	#7960AB
colon-679-FMT-AKK_74	Sa	FMT-AKK	#7960AB
colon-680-FMT-AKK_75	Sa	FMT-AKK	#7960AB
colon-667-FMT-AKK-Pas_62	Sa	FMT-AKK-Pas	#54278F
colon-671-FMT-AKK-Pas_66	Sa	FMT-AKK-Pas	#54278F
colon-676-FMT-AKK-Pas_71	Sa	FMT-AKK-Pas	#54278F
colon-677-FMT-AKK-Pas_72	Sa	FMT-AKK-Pas	#54278F
colon-681-FMT-AKK-Pas_76	Sa	FMT-AKK-Pas	#54278F
Bl_matrice-colon_3a	Bl	#N/A	#N/A
Bl_matrice-colon_3b	Bl	#N/A	#N/A
Bl_matrice-colon_3c	Bl	#N/A	#N/A
QC_colon_4b	QC	#N/A	#N/A
QC_colon_4c	QC	#N/A	#N/A
QC_colon_4d	QC	#N/A	#N/A
QC_colon_4e	QC	#N/A	#N/A
QC_colon_4e_191121162904	QC	#N/A	#N/A
colon-684-SPF_79	Sa	SPF	#74C476
colon-685-SPF_80	Sa	SPF	#74C476
colon-687-SPF_82	Sa	SPF	#74C476
colon-689-SPF_84	Sa	SPF	#74C476
colon-693-SPF_88	Sa	SPF	#74C476
colon-695-SPF_90	Sa	SPF	#74C476

## Sheet: MetabolitesInfos
Checked	Analyte	MetName	MW	RT	MF	CSID	KEGG	Method
VRAI	2,4-Pentandione@2.218-rp	2,4-Pentandione	100.053	2.218	C5H8O2	29001	Other	rp
VRAI	139.06106@1.052-rp	#N/A	139.061	1.052	C3H5N7	#N/A	#N/A	rp
VRAI	Fenipentol@11.093-rp	Fenipentol	164.12	11.093	C11H16O	3221	#N/A	rp
VRAI	N-(Carboxymethyl)homocysteine@1.218-rp	N-(Carboxymethyl)homocysteine	193.041	1.218	C6H11NO4S	58145954	#N/A	rp
VRAI	200.06635@2.221-rp	#N/A	200.066	2.221	C5H8N6O3	#N/A	#N/A	rp
VRAI	211.07559@10.891-rp	#N/A	211.076	10.891	C4H15N5OP2	#N/A	#N/A	rp
VRAI	219.06192@10.887-rp	#N/A	219.062	10.887	C6H5N9O	#N/A	#N/A	rp
VRAI	219.12561@10.89-rp	#N/A	219.126	10.89	C13H17NO2	#N/A	#N/A	rp
VRAI	(Z)-3-Hexenylsalicylate@11.091-rp	(Z)-3-Hexenylsalicylate	220.11	11.091	C13H16O3	#N/A	Metabolic pathways;Biosynthesis of secondary metabolites;Ubiquinone and other terpenoid-quinone biosynthesis	rp
VRAI	5,6-Dimethoxy-1H-indole-2-carboxylicacid@7.918-rp	5,6-Dimethoxy-1H-indole-2-carboxylicacid	221.069	7.918	C11H11NO4	#N/A	#N/A	rp
VRAI	Methyljasmonate@11.114-rp	Methyljasmonate	224.142	11.114	C13H20O3	#N/A	Biosynthesis of secondary metabolites;Other	rp
VRAI	4-(Methoxycarbonyl)phenylsulfate@2.221-rp	4-(Methoxycarbonyl)phenylsulfate	230.996	2.221	C8H7O6S	14542629	#N/A	rp
VRAI	JussiaeiineA@3.568-rp	JussiaeiineA	236.153	3.568	C13H20N2O2	#N/A	#N/A	rp
VRAI	Decylsulfate@2.082-rp	Decylsulfate	237.117	2.082	C10H21O4S	8560888	#N/A	rp
VRAI	242.07733@1.782-rp	#N/A	242.077	1.782	C7H10N6O4	#N/A	#N/A	rp
VRAI	244.08516@9.64-rp	#N/A	244.085	9.64	C11H17O4P	#N/A	#N/A	rp
VRAI	3-Hydroxylidocaine@5.408-rp	3-Hydroxylidocaine	250.168	5.408	C14H22N2O2	142125	Other	rp
VRAI	257.16178@1.853-rp	#N/A	257.162	1.853	C13H23NO4	#N/A	#N/A	rp
VRAI	Caffeicacid3-sulfate@4.482-rp	Caffeicacid3-sulfate	260	4.482	C9H8O7S	13185260	#N/A	rp
VRAI	AignopsanoicacidB@10.694-rp	AignopsanoicacidB	268.168	10.694	C15H24O4	#N/A	#N/A	rp
VRAI	270.14734@11.091-rp	#N/A	270.147	11.091	C14H22O5	#N/A	#N/A	rp
VRAI	272.06032@9.628-rp	#N/A	272.06	9.628	C6H8N8O5	#N/A	#N/A	rp
VRAI	272.14879@1.627-rp	#N/A	272.149	1.627	C13H25N2PS	#N/A	#N/A	rp
VRAI	277.92097@1.079-rp	#N/A	277.921	1.079	C4H5Cl3N4O2S	#N/A	#N/A	rp
VRAI	Mepyramine@6.6-rp	Mepyramine	285.185	6.6	C17H23N3O	#N/A	#N/A	rp
VRAI	Shikonin@12.983-rp	Shikonin	288.1	12.983	C16H16O5	420739	Metabolic pathways;Biosynthesis of secondary metabolites;Ubiquinone and other terpenoid-quinone biosynthesis;Other	rp
VRAI	291.01728@2.222-rp	#N/A	291.017	2.222	C8H9N3O7S	#N/A	#N/A	rp
VRAI	292.1293@11.089-rp	#N/A	292.129	11.089	C20H20S	#N/A	#N/A	rp
VRAI	293.21062@1.655-rp	#N/A	293.211	1.655	C16H27N3O2	#N/A	#N/A	rp
VRAI	EthylN-[2,2-dimethyl-3-(nitrooxy)propanoyl]cysteinate@1.83-rp	EthylN-[2,2-dimethyl-3-(nitrooxy)propanoyl]cysteinate	294.089	1.83	C10H18N2O6S	366582	#N/A	rp
VRAI	295.04972@5.886-rp	#N/A	295.05	5.886	C9H19N3P2S2	#N/A	#N/A	rp
VRAI	296.21373@11.312-rp	#N/A	296.214	11.312	C15H29N4P	#N/A	#N/A	rp
VRAI	297.13231@11.88-rp	#N/A	297.132	11.88	C6H19N9O3S	#N/A	#N/A	rp
VRAI	2',4-Dihydroxy-4',6'-dimethoxychalcone@10.942-rp	2',4-Dihydroxy-4',6'-dimethoxychalcone	300.1	10.942	C17H16O5	4874893	#N/A	rp
VRAI	Azapropazone@6.903-rp	Azapropazone	300.158	6.903	C16H20N4O2	24310	#N/A	rp
VRAI	Mucronulatol@10.942-rp	Mucronulatol	302.116	10.942	C17H18O5	3682776	#N/A	rp
VRAI	302.22454@12.564-rp	#N/A	302.225	12.564	C14H31N4OP	#N/A	Metabolic pathways;Biosynthesis of secondary metabolites;Other	rp
VRAI	303.07854@7.266-rp	#N/A	303.079	7.266	C12H17NO6S	#N/A	#N/A	rp
VRAI	305.11867@11.557-rp	#N/A	305.119	11.557	C6H19N5O9	#N/A	#N/A	rp
VRAI	308.15233@12.876-rp	#N/A	308.152	12.876	C13H29N2PS2	#N/A	#N/A	rp
VRAI	311.16625@4.877-rp	#N/A	311.166	4.877	C8H25N9S2	#N/A	#N/A	rp
VRAI	Methylretinoate@11.318-rp	Methylretinoate	314.224	11.318	C21H30O2	#N/A	Metabolic pathways;Biosynthesis of secondary metabolites;Other	rp
VRAI	316.14656@2.224-rp	#N/A	316.147	2.224	C7H24N8O2S2	#N/A	#N/A	rp
VRAI	1'-Benzyl-3,4-dihydrospiro[isochromene-1,4'-piperidine]-3-carbonitrile@7.004-rp	1'-Benzyl-3,4-dihydrospiro[isochromene-1,4'-piperidine]-3-carbonitrile	318.174	7.004	C21H22N2O	109080	#N/A	rp
VRAI	319.03677@3.669-rp	#N/A	319.037	3.669	C14H14N3PS2	#N/A	#N/A	rp
VRAI	335.22141@6.626-rp	#N/A	335.221	6.626	C18H29N3O3	#N/A	#N/A	rp
VRAI	2-(2,5-Dioxo-4,4-dipropyl-1-imidazolidinyl)-N-(3-methoxyphenyl)acetamide@6.8-rp	2-(2,5-Dioxo-4,4-dipropyl-1-imidazolidinyl)-N-(3-methoxyphenyl)acetamide	347.184	6.8	C18H25N3O4	1565902	#N/A	rp
VRAI	353.02465@3.603-rp	#N/A	353.025	3.603	C6H12N9O3PS2	#N/A	#N/A	rp
VRAI	354.10851@7.07-rp	#N/A	354.109	7.07	C24H18OS	#N/A	#N/A	rp
VRAI	N-[2-[[4-(2-hydroxyethylamino)-6-(1-pyrrolidinyl)-1,3,5-triazin-2-yl]amino]phenyl]acetamide@2.959-rp	N-[2-[[4-(2-hydroxyethylamino)-6-(1-pyrrolidinyl)-1,3,5-triazin-2-yl]amino]phenyl]acetamide	357.19	2.959	C17H23N7O2	554677	#N/A	rp
VRAI	368.18453@7.499-rp	#N/A	368.185	7.499	C12H30N6O3P2	#N/A	#N/A	rp
VRAI	N',O'-Diacetylfusarochromanone@10.037-rp	N',O'-Diacetylfusarochromanone	376.164	10.037	C19H24N2O6	#N/A	#N/A	rp
VRAI	BruceollineK@10.535-rp	BruceollineK	377.147	10.535	C19H23NO7	#N/A	#N/A	rp
VRAI	3-hydroxy-16-methoxy-2,3-dihydrotabersonine@10.661-rp	3-hydroxy-16-methoxy-2,3-dihydrotabersonine	384.205	10.661	C22H28N2O4	137342	Biosynthesis of secondary metabolites;Other	rp
VRAI	JerantinineE@10.888-rp	JerantinineE	384.205	10.888	C22H28N2O4	#N/A	Biosynthesis of secondary metabolites;Other	rp
VRAI	387.19346@2.483-rp	#N/A	387.193	2.483	C10H30N9O3PS	#N/A	#N/A	rp
VRAI	(-)-11-hydroxy-9,10-dihydrojasmonicacid11-beta-D-glucoside@6.875-rp	(-)-11-hydroxy-9,10-dihydrojasmonicacid11-beta-D-glucoside	390.189	6.875	C18H30O9	10147234	#N/A	rp
VRAI	N-[(Benzyloxy)carbonyl]-L-phenylalanyl-L-valine@9.901-rp	N-[(Benzyloxy)carbonyl]-L-phenylalanyl-L-valine	398.184	9.901	C22H26N2O5	5360496	#N/A	rp
VRAI	398.18482@10.883-rp	#N/A	398.185	10.883	C17H23N10P	#N/A	#N/A	rp
VRAI	398.22045@11.505-rp	#N/A	398.22	11.505	C25H35PS	#N/A	Biosynthesis of secondary metabolites;Other	rp
VRAI	11-O-demethyl-17-O-deacetylvindoline@10.295-rp	11-O-demethyl-17-O-deacetylvindoline	400.199	10.295	C22H28N2O5	4472345	#N/A	rp
VRAI	ReserpicAcid@9.897-rp	ReserpicAcid	400.2	9.897	C22H28N2O5	59170	#N/A	rp
VRAI	406.18732@10.884-rp	#N/A	406.187	10.884	C21H33N2P3	#N/A	#N/A	rp
VRAI	406.18739@10.663-rp	#N/A	406.187	10.663	C17H31N2O7P	#N/A	#N/A	rp
VRAI	Mevinicacid@12.262-rp	Mevinicacid	408.252	12.262	C23H36O6	#N/A	#N/A	rp
VRAI	Deacetylvindoline@10.809-rp	Deacetylvindoline	414.216	10.809	C23H30N2O5	#N/A	Biosynthesis of secondary metabolites;Other	rp
VRAI	420.3098@11.246-rp	#N/A	420.31	11.246	C21H45N2O4P	#N/A	#N/A	rp
VRAI	N-[(2S,3S,6R)-2-(hydroxymethyl)-6-[2-(4-phenyl-1-triazolyl)ethyl]-3-oxanyl]-2-(2-pyridinyl)acetamide@10.72-rp	N-[(2S,3S,6R)-2-(hydroxymethyl)-6-[2-(4-phenyl-1-triazolyl)ethyl]-3-oxanyl]-2-(2-pyridinyl)acetamide	421.212	10.72	C23H27N5O3	58146938	#N/A	rp
VRAI	422.15125@10.885-rp	#N/A	422.151	10.885	C11H26N4O13	#N/A	#N/A	rp
VRAI	447.20118@10.662-rp	#N/A	447.201	10.662	C31H29NS	#N/A	#N/A	rp
VRAI	447.20119@10.892-rp	#N/A	447.201	10.892	C26H31N3P2	#N/A	#N/A	rp
VRAI	447.22869@11.584-rp	#N/A	447.229	11.584	C17H35N7O3P2	#N/A	#N/A	rp
VRAI	463.19637@9.896-rp	#N/A	463.196	9.896	C24H36NO2P3	#N/A	#N/A	rp
VRAI	463.27521@12.862-rp	#N/A	463.275	12.862	C22H39N7P2	#N/A	#N/A	rp
VRAI	N-[6-amino-2,4-dioxo-1-(phenylmethyl)-5-pyrimidinyl]-2-[(1-ethyl-2-benzimidazolyl)thio]-N-methylacetamide@10.249-rp	N-[6-amino-2,4-dioxo-1-(phenylmethyl)-5-pyrimidinyl]-2-[(1-ethyl-2-benzimidazolyl)thio]-N-methylacetamide	464.161	10.249	C23H24N6O3S	4064829	#N/A	rp
VRAI	1-(Adamantan-2-ylamino)-1-oxo-2-butanyl4-(methylsulfonyl)-3-nitrobenzoate@10.488-rp	1-(Adamantan-2-ylamino)-1-oxo-2-butanyl4-(methylsulfonyl)-3-nitrobenzoate	464.163	10.488	C22H28N2O7S	58163589	#N/A	rp
VRAI	466.20872@10.662-rp	#N/A	466.209	10.662	C28H37P3	#N/A	#N/A	rp
VRAI	3,3'-{[(2-Dodecylphenyl)methylene]disulfanediyl}dipropanoicacid@10.894-rp	3,3'-{[(2-Dodecylphenyl)methylene]disulfanediyl}dipropanoicacid	468.238	10.894	C25H40O4S2	112142	#N/A	rp
VRAI	469.20565@6.659-rp	#N/A	469.206	6.659	C15H32N7O8P	#N/A	#N/A	rp
VRAI	469.22184@10.891-rp	#N/A	469.222	10.891	C16H36N7O5PS	#N/A	#N/A	rp
VRAI	476.21623@10.882-rp	#N/A	476.216	10.882	C26H39O2P3	#N/A	#N/A	rp
VRAI	478.17793@11.055-rp	#N/A	478.178	11.055	C27H32N2P2S	#N/A	#N/A	rp
VRAI	479.26995@11.805-rp	#N/A	479.27	11.805	C22H39N7OP2	#N/A	#N/A	rp
VRAI	BlestriareneB@10.3-rp	BlestriareneB	480.157	10.3	C30H24O6	391051	#N/A	rp
VRAI	480.15747@8.341-rp	#N/A	480.157	8.341	C17H25N10O3PS	#N/A	#N/A	rp
VRAI	480.15755@9.061-rp	#N/A	480.158	9.061	C17H35N6P3S2	#N/A	#N/A	rp
VRAI	481.28583@12.864-rp	#N/A	481.286	12.864	C22H41N7OP2	#N/A	#N/A	rp
VRAI	485.23036@9.482-rp	#N/A	485.23	9.482	C23H40N3O2PS2	#N/A	#N/A	rp
VRAI	488.22642@8.199-rp	#N/A	488.226	8.199	C23H36O11	#N/A	#N/A	rp
VRAI	499.27562@11.885-rp	#N/A	499.276	11.885	C31H38N3OP	#N/A	#N/A	rp
VRAI	499.29674@13.146-rp	#N/A	499.297	13.146	C19H45N7O4S2	#N/A	Bile secretion;Other	rp
VRAI	500.14621@10.891-rp	#N/A	500.146	10.891	C12H28N4O17	#N/A	#N/A	rp
VRAI	502.14119@10.658-rp	#N/A	502.141	10.658	C25H22N6O4S	#N/A	#N/A	rp
VRAI	510.16839@10.202-rp	#N/A	510.168	10.202	C25H37O3P3S	#N/A	#N/A	rp
VRAI	514.32315@1.846-rp	#N/A	514.323	1.846	C20H47N6O7P	#N/A	#N/A	rp
VRAI	515.29223@12.279-rp	#N/A	515.292	12.279	C22H43N7O3P2	#N/A	Metabolic pathways;Bile secretion;Other	rp
VRAI	Taurohyocholicacid@11.573-rp	Taurohyocholicacid	515.292	11.573	C26H45NO7S	#N/A	Metabolic pathways;Bile secretion;Other	rp
VRAI	Tauro-?-muricholicacid@11.662-rp	Tauro-?-muricholicacid	515.292	11.662	C26H45NO7S	#N/A	Metabolic pathways;Bile secretion;Other	rp
VRAI	516.29369@11.761-rp	#N/A	516.294	11.761	C17H47N10P3S	#N/A	Metabolic pathways;Biosynthesis of secondary metabolites;Other	rp
VRAI	3-O-(alpha-L-olivosyl)oleandolide@11.641-rp	3-O-(alpha-L-olivosyl)oleandolide	516.296	11.641	C26H44O10	473227	Metabolic pathways;Biosynthesis of secondary metabolites;Other	rp
VRAI	516.29585@11.477-rp	#N/A	516.296	11.477	C20H50N6OP2S2	#N/A	Metabolic pathways;Biosynthesis of secondary metabolites;Other	rp
VRAI	517.28828@11.557-rp	#N/A	517.288	11.557	C30H39N5OS	#N/A	#N/A	rp
VRAI	LucidenicacidP@11.849-rp	LucidenicacidP	518.289	11.849	C29H42O8	#N/A	#N/A	rp
VRAI	522.33012@12.679-rp	#N/A	522.33	12.679	C32H48N2P2	#N/A	#N/A	rp
VRAI	2-Hydroxy-3-(phosphonooxy)propyl22-methyltricosanoate@11.123-rp	2-Hydroxy-3-(phosphonooxy)propyl22-methyltricosanoate	522.366	11.123	C27H55O7P	74851447	#N/A	rp
VRAI	529.27154@9.983-rp	#N/A	529.272	9.983	C21H40N9O3PS	#N/A	#N/A	rp
VRAI	(3?,5?)-3-{[N-(4-Aminobutyl)glycyl]oxy}-5,14-dihydroxy-19-oxocard-20(22)-enolid@11.765-rp	(3?,5?)-3-{[N-(4-Aminobutyl)glycyl]oxy}-5,14-dihydroxy-19-oxocard-20(22)-enolid	532.317	11.765	C29H44N2O7	#N/A	#N/A	rp
VRAI	533.32091@11.567-rp	#N/A	533.321	11.567	C19H47N7O8S	#N/A	#N/A	rp
VRAI	533.32093@11.869-rp	#N/A	533.321	11.869	C18H48N9O5PS	#N/A	#N/A	rp
VRAI	533.33316@7.12-rp	#N/A	533.333	7.12	C18H49N9O5P2	#N/A	#N/A	rp
VRAI	534.26506@11.549-rp	#N/A	534.265	11.549	C16H45N10O2P3S	#N/A	Biosynthesis of secondary metabolites;Other	rp
VRAI	535.29588@12.641-rp	#N/A	535.296	12.641	C31H42N3O3P	#N/A	#N/A	rp
VRAI	537.27287@11.765-rp	#N/A	537.273	11.765	C19H43N3O14	#N/A	#N/A	rp
VRAI	541.29292@12.053-rp	#N/A	541.293	12.053	C27H50N3P3S	#N/A	#N/A	rp
VRAI	542.29839@13.004-rp	#N/A	542.298	13.004	C32H49OP3	#N/A	#N/A	rp
VRAI	1,5-Anhydro-1-[3-(3,4-dihydroxybenzoyl)-2,4,6-trihydroxyphenyl]-6-O-(4-hydroxybenzoyl)hexitol@9.634-rp	1,5-Anhydro-1-[3-(3,4-dihydroxybenzoyl)-2,4,6-trihydroxyphenyl]-6-O-(4-hydroxybenzoyl)hexitol	544.12	9.634	C26H24O13	34999869	#N/A	rp
VRAI	552.31763@7.885-rp	#N/A	552.318	7.885	C30H45N6PS	#N/A	#N/A	rp
VRAI	553.23753@11.819-rp	#N/A	553.238	11.819	C18H46N5O6P3S	#N/A	#N/A	rp
VRAI	557.15968@10.892-rp	#N/A	557.16	10.892	C13H31N7O15S	#N/A	#N/A	rp
VRAI	558.3061@13.79-rp	#N/A	558.306	13.79	C22H52N6O2P2S2	#N/A	#N/A	rp
VRAI	558.33823@5.707-rp	#N/A	558.338	5.707	C25H46N6O8	#N/A	#N/A	rp
VRAI	560.11518@9.407-rp	#N/A	560.115	9.407	C25H31N4OP3S2	#N/A	#N/A	rp
VRAI	(4E,6Z,10E)-20,22-Dihydroxy-13,14,17-trimethoxy-4,8,10,12,16-pentamethyl-3-oxo-2-azabicyclo[16.3.1]docosa-1(22),4,6,10,18,20-hexaen-9-ylcarbamate@12.997-rp	(4E,6Z,10E)-20,22-Dihydroxy-13,14,17-trimethoxy-4,8,10,12,16-pentamethyl-3-oxo-2-azabicyclo[16.3.1]docosa-1(22),4,6,10,18,20-hexaen-9-ylcarbamate	560.311	12.997	C30H44N2O8	10299955	#N/A	rp
VRAI	Laxifloranone@13.234-rp	Laxifloranone	562.326	13.234	C35H46O6	21864794	#N/A	rp
VRAI	563.28214@1.585-rp	#N/A	563.282	1.585	C22H52N3O5P3S	#N/A	#N/A	rp
VRAI	568.27415@7.749-rp	#N/A	568.274	7.749	C29H46O7P2	#N/A	#N/A	rp
VRAI	569.20949@11.816-rp	#N/A	569.209	11.816	C23H46BrClN5PS	#N/A	#N/A	rp
VRAI	Taurochenodeoxycholate-3-sulfate@12.065-rp	Taurochenodeoxycholate-3-sulfate	579.255	12.065	C26H45NO9S2	19005042	#N/A	rp
VRAI	581.30088@12.853-rp	#N/A	581.301	12.853	C25H49N3O8P2	#N/A	#N/A	rp
VRAI	588.29377@11.008-rp	#N/A	588.294	11.008	C26H55O6P3S	#N/A	Metabolic pathways;Biosynthesis of secondary metabolites;Other	rp
VRAI	594.26444@11.834-rp	#N/A	594.264	11.834	C29H42N2O9S	#N/A	#N/A	rp
VRAI	Ergostine@12.265-rp	Ergostine	595.28	12.265	C34H37N5O5	19988989	#N/A	rp
VRAI	597.29541@11.874-rp	#N/A	597.295	11.874	C31H43N5O5S	#N/A	#N/A	rp
VRAI	597.29543@11.604-rp	#N/A	597.295	11.604	C27H54NO5P3S	#N/A	#N/A	rp
VRAI	598.29849@11.827-rp	#N/A	598.298	11.827	C24H47N4O11P	#N/A	#N/A	rp
VRAI	601.23624@12.975-rp	#N/A	601.236	12.975	C16H45N9O7P2S2	#N/A	#N/A	rp
VRAI	(5,5'-Bi-1H-Naphtho(2,3-c)pyran)-4,10,10'-triol,3,3',4,4'-tetrahydro-7,7',9,9'-tetramethoxy-3,3'-dimethyl-,4-acetate@10.943-rp	(5,5'-Bi-1H-Naphtho(2,3-c)pyran)-4,10,10'-triol,3,3',4,4'-tetrahydro-7,7',9,9'-tetramethoxy-3,3'-dimethyl-,4-acetate	604.232	10.943	C34H36O10	8845367	#N/A	rp
VRAI	610.23685@11.84-rp	#N/A	610.237	11.84	C25H49BrClN6PS	#N/A	#N/A	rp
VRAI	610.23703@11.564-rp	#N/A	610.237	11.564	C25H50Cl2O8P2	#N/A	#N/A	rp
VRAI	612.23642@11.777-rp	#N/A	612.236	11.777	C29H45ClN4O2S3	#N/A	#N/A	rp
VRAI	613.26714@11.816-rp	#N/A	613.267	11.816	C40H39NO3S	#N/A	#N/A	rp
VRAI	613.27017@11.883-rp	#N/A	613.27	11.883	C17H43N9O13S	#N/A	#N/A	rp
VRAI	614.31803@7.353-rp	#N/A	614.318	7.353	C29H42N8O7	#N/A	#N/A	rp
VRAI	622.33297@4.87-rp	#N/A	622.333	4.87	C33H48N6O2P2	#N/A	#N/A	rp
VRAI	630.34101@16.22-rp	#N/A	630.341	16.22	C33H53N4O2P3	#N/A	#N/A	rp
VRAI	630.34118@15.444-rp	#N/A	630.341	15.444	C23H52N8O8P2	#N/A	#N/A	rp
VRAI	632.35713@14.704-rp	#N/A	632.357	14.704	C32H44N10O4	#N/A	#N/A	rp
VRAI	632.35725@15.237-rp	#N/A	632.357	15.237	C39H54O3P2	#N/A	#N/A	rp
VRAI	633.36296@13.517-rp	#N/A	633.363	13.517	C35H58NO3P3	#N/A	#N/A	rp
VRAI	644.36502@7.237-rp	#N/A	644.365	7.237	C47H48O2	#N/A	#N/A	rp
VRAI	647.3662@15.446-rp	#N/A	647.366	15.446	C39H55NO3P2	#N/A	#N/A	rp
VRAI	648.35219@12.618-rp	#N/A	648.352	12.618	C35H49N6O4P	#N/A	#N/A	rp
VRAI	649.38249@14.699-rp	#N/A	649.382	14.699	C31H51N7O8	#N/A	#N/A	rp
VRAI	657.41826@6.921-rp	#N/A	657.418	6.921	C33H59N3O10	#N/A	#N/A	rp
VRAI	663.37369@13.092-rp	#N/A	663.374	13.092	C23H53N9O13	#N/A	#N/A	rp
VRAI	673.28165@11.858-rp	#N/A	673.282	11.858	C23H50N9O6P3S	#N/A	#N/A	rp
VRAI	673.3763@6.846-rp	#N/A	673.376	6.846	C30H58N7O4P3	#N/A	#N/A	rp
VRAI	679.29835@11.883-rp	#N/A	679.298	11.883	C22H51N9O9P2S	#N/A	#N/A	rp
VRAI	686.43283@6.719-rp	#N/A	686.433	6.719	C33H65N6O3P3	#N/A	#N/A	rp
VRAI	691.36983@12.941-rp	#N/A	691.37	12.941	C33H58NO12P	#N/A	#N/A	rp
VRAI	706.34016@1.764-rp	#N/A	706.34	1.764	C30H61O12P3	#N/A	#N/A	rp
VRAI	729.39127@6.352-rp	#N/A	729.391	6.352	C28H61N9O7P2S	#N/A	#N/A	rp
VRAI	732.36539@3.606-rp	#N/A	732.365	3.606	C30H62N4O10P2S	#N/A	#N/A	rp
VRAI	741.34922@5.831-rp	#N/A	741.349	5.831	C28H60N3O15PS	#N/A	#N/A	rp
VRAI	772.45945@8.385-rp	#N/A	772.459	8.385	C34H64N10O8S	#N/A	#N/A	rp
VRAI	815.39219@1.98-rp	#N/A	815.392	1.98	C36H68NO13P3	#N/A	#N/A	rp
VRAI	821.39585@9.647-rp	#N/A	821.396	9.647	C36H55N9O13	#N/A	#N/A	rp
VRAI	832.4553@7.612-rp	#N/A	832.455	7.612	C38H73O17P	#N/A	#N/A	rp
VRAI	835.40915@6.178-rp	#N/A	835.409	6.178	C30H62N9O16P	#N/A	#N/A	rp
VRAI	843.46979@8.505-rp	#N/A	843.47	8.505	C38H71N9O6P2S	#N/A	#N/A	rp
VRAI	867.3184@12.052-rp	#N/A	867.318	12.052	C53H45N3O9	#N/A	#N/A	rp
VRAI	897.46006@7.066-rp	#N/A	897.46	7.066	C42H67N5O16	#N/A	#N/A	rp
VRAI	913.5593@7.433-rp	#N/A	913.559	7.433	C39H80N9O13P	#N/A	Other	rp
VRAI	927.51419@7.294-rp	#N/A	927.514	7.294	C35H77N9O17S	#N/A	#N/A	rp
VRAI	936.60042@8.43-rp	#N/A	936.6	8.43	C42H89N4O16P	#N/A	#N/A	rp
VRAI	939.57163@11.767-rp	#N/A	939.572	11.767	C56H84N3O3P3	#N/A	#N/A	rp
VRAI	954.52508@6.979-rp	#N/A	954.525	6.979	C36H80N10O15P2	#N/A	#N/A	rp
VRAI	955.50933@7.156-rp	#N/A	955.509	7.156	C54H72N9OP3	#N/A	#N/A	rp
VRAI	957.56145@6.323-rp	#N/A	957.561	6.323	C48H83N3O14S	#N/A	#N/A	rp
VRAI	961.45321@11.509-rp	#N/A	961.453	11.509	C36H78N5O18P3	#N/A	#N/A	rp
VRAI	962.58072@14.434-rp	#N/A	962.581	14.434	C56H89N2O3P3S	#N/A	#N/A	rp
VRAI	974.51938@10.891-rp	#N/A	974.519	10.891	C46H75N10O9PS	#N/A	#N/A	rp
VRAI	987.54129@13.093-rp	#N/A	987.541	13.093	C42H83N7O15P2	#N/A	#N/A	rp
VRAI	987.54158@13.376-rp	#N/A	987.542	13.376	C44H91N7O5P2S4	#N/A	#N/A	rp
VRAI	1030.58025@11.758-rp	#N/A	1030.58	11.758	C52H88N8O5P2S2	#N/A	#N/A	rp
VRAI	1031.58992@11.882-rp	#N/A	1031.59	11.882	C45H94N9O7PS4	#N/A	#N/A	rp
VRAI	1039.57763@6.455-rp	#N/A	1039.58	6.455	C45H88N9O12P3	#N/A	#N/A	rp
VRAI	1040.59721@7.796-rp	#N/A	1040.6	7.796	C59H83N10OP3	#N/A	#N/A	rp
VRAI	1052.56765@11.81-rp	#N/A	1052.57	11.81	C43H94N10O7P2S4	#N/A	#N/A	rp
VRAI	1068.52792@11.799-rp	#N/A	1068.53	11.799	C48H89N6O10PS4	#N/A	#N/A	rp
VRAI	1068.52878@11.55-rp	#N/A	1068.53	11.55	C63H90O2P2S4	#N/A	#N/A	rp
VRAI	1078.54174@6.293-rp	#N/A	1078.54	6.293	C51H87N2O18PS	#N/A	#N/A	rp
VRAI	1106.54812@11.565-rp	#N/A	1106.55	11.565	C59H83N2O16P	#N/A	#N/A	rp
VRAI	1110.5373@11.559-rp	#N/A	1110.54	11.559	C51H89N10O5P3S3	#N/A	#N/A	rp
VRAI	1110.53894@11.822-rp	#N/A	1110.54	11.822	C45H92N8O13P2S3	#N/A	#N/A	rp
VRAI	1110.54465@11.534-rp	#N/A	1110.54	11.534	C54H84N10O7P2S2	#N/A	#N/A	rp
VRAI	1111.54057@11.675-rp	#N/A	1111.54	11.675	C40H91N9O18P2S2	#N/A	#N/A	rp
VRAI	1157.47347@6.63-rp	#N/A	1157.47	6.63	C49H78N9O17P3	#N/A	#N/A	rp
VRAI	1184.69962@10.248-rp	#N/A	1184.7	10.248	C55H107N6O15P3	#N/A	#N/A	rp
VRAI	1265.4335@5.194-rp	#N/A	1265.43	5.194	C68H74N3O15P3	#N/A	#N/A	rp
VRAI	1382.75011@7.363-rp	#N/A	1382.75	7.363	C68H107N10O18P	#N/A	#N/A	rp
VRAI	1405.71929@7.663-rp	#N/A	1405.72	7.663	C70H114N5O16P3S	#N/A	#N/A	rp
VRAI	1426.6944@7.66-rp	#N/A	1426.69	7.66	C70H109N8O15P3S	#N/A	#N/A	rp
VRAI	1461.47062@6.089-rp	#N/A	1461.47	6.089	C70H82N9O18P3S	#N/A	#N/A	rp
VRAI	1555.58055@2.117-rp	#N/A	1555.58	2.117	C76H100N7O18P3S2	#N/A	#N/A	rp
VRAI	1583.81787@11.793-rp	#N/A	1583.82	11.793	C82H130N5O15PS4	#N/A	#N/A	rp
VRAI	1583.86696@8.461-rp	#N/A	1583.87	8.461	C86H122N9O17P	#N/A	#N/A	rp
VRAI	1617.84994@8.57-rp	#N/A	1617.85	8.57	C76H134N9O18P3S2	#N/A	#N/A	rp
FAUX	100.00123@0.892-rp	#N/A	100.001	0.892	#N/A	#N/A	#N/A	rp
FAUX	(2E)-4-Oxo-2-butenoicacid@1.591-rp	(2E)-4-Oxo-2-butenoicacid	100.016	1.591	C4H4O3	4473985	#N/A	rp
FAUX	100.01662@1.6-rp	#N/A	100.017	1.6	#N/A	#N/A	#N/A	rp
FAUX	100.05167@1.088-rp	#N/A	100.052	1.088	#N/A	#N/A	#N/A	rp
FAUX	Tiglicacid@1.075-rp	Tiglicacid	100.052	1.075	C5H8O2	111629	Other	rp
FAUX	5-Valerolactone@1.638-rp	5-Valerolactone	100.053	1.638	C5H8O2	#N/A	Other	rp
FAUX	1-Aminocyclopropane-1-carboxylate@1.064-rp	1-Aminocyclopropane-1-carboxylate	101.048	1.064	C4H7NO2	#N/A	Metabolic pathways;Biosynthesis of secondary metabolites;Biosynthesis of plant secondary metabolites;Biosynthesis of plant hormones;Other	rp
FAUX	2-MethylpropanalO-methyloxime@1.029-rp	2-MethylpropanalO-methyloxime	101.084	1.029	C5H11NO	#N/A	Metabolic pathways;Biosynthesis of secondary metabolites;Microbial metabolism in diverse environments;2-Oxocarboxylic acid metabolism;Other	rp
FAUX	101.99862@0.886-rp	#N/A	101.999	0.886	C2H3N2OP	#N/A	#N/A	rp
FAUX	D-?-Hydroxyglutaricacid@1.442-rp	D-?-Hydroxyglutaricacid	102.032	1.442	C5H8O5	#N/A	Metabolic pathways;Biosynthesis of secondary metabolites;Microbial metabolism in diverse environments;Biosynthesis of amino acids;2-Oxocarboxylic acid metabolism;Tyrosine metabolism;Other	rp
FAUX	(S)-Methylmalonatesemialdehyde@1.269-rp	(S)-Methylmalonatesemialdehyde	102.032	1.269	C4H6O3	#N/A	Metabolic pathways;Biosynthesis of secondary metabolites;Microbial metabolism in diverse environments;Biosynthesis of amino acids;2-Oxocarboxylic acid metabolism;Tyrosine metabolism;Other	rp
FAUX	Phenylacetylene@1.944-rp	Phenylacetylene	102.047	1.944	C8H6	10364	#N/A	rp
FAUX	3-Methylbutanoicacid@6.664-rp	3-Methylbutanoicacid	102.068	6.664	C5H10O2	#N/A	Biosynthesis of secondary metabolites;Other	rp
FAUX	3-Methylbutanoicacid@7.192-rp	3-Methylbutanoicacid	102.068	7.192	C5H10O2	#N/A	Biosynthesis of secondary metabolites;Other	rp
FAUX	Thiomorpholine@1.254-rp	Thiomorpholine	103.046	1.254	C4H9NS	60509	#N/A	rp
FAUX	(R)-3-Amino-2-methylpropanoate@1.048-rp	(R)-3-Amino-2-methylpropanoate	103.063	1.048	C4H9NO2	#N/A	Metabolic pathways;Microbial metabolism in diverse environments;Other	rp
FAUX	Choline@1.036-rp	Choline	103.1	1.036	C5H13NO	#N/A	#N/A	rp
FAUX	103.98511@0.981-rp	#N/A	103.985	0.981	#N/A	#N/A	#N/A	rp
FAUX	2-Hydroxy-3-oxopropanoate@1.258-rp	2-Hydroxy-3-oxopropanoate	104.011	1.258	C3H4O4	#N/A	Metabolic pathways;Biosynthesis of secondary metabolites;Microbial metabolism in diverse environments;Other	rp
FAUX	2-Hydroxy-3-oxopropanoate@1.079-rp	2-Hydroxy-3-oxopropanoate	104.011	1.079	C3H4O4	#N/A	Metabolic pathways;Biosynthesis of secondary metabolites;Microbial metabolism in diverse environments;Other	rp
FAUX	8-Hydroxyquinoline@7.62-rp	8-Hydroxyquinoline	104.026	7.62	C9H7NO	1847	#N/A	rp
FAUX	tetrahydrothiophene1-oxide@2.913-rp	tetrahydrothiophene1-oxide	104.03	2.913	C4H8OS	#N/A	#N/A	rp
FAUX	(R)-3-Hydroxybutanoate@1.647-rp	(R)-3-Hydroxybutanoate	104.047	1.647	C4H8O3	#N/A	Metabolic pathways;Microbial metabolism in diverse environments;Other	rp
FAUX	(R)-3-Hydroxybutanoate@6.231-rp	(R)-3-Hydroxybutanoate	104.047	6.231	C4H8O3	#N/A	Metabolic pathways;Microbial metabolism in diverse environments;Other	rp
FAUX	(R)-3-Hydroxybutanoate@3.455-rp	(R)-3-Hydroxybutanoate	104.048	3.455	C4H8O3	#N/A	Metabolic pathways;Microbial metabolism in diverse environments;Other	rp
FAUX	(R)-3-Hydroxybutanoate@8.963-rp	(R)-3-Hydroxybutanoate	104.048	8.963	C4H8O3	#N/A	Metabolic pathways;Microbial metabolism in diverse environments;Other	rp
FAUX	D-Serine@1.274-rp	D-Serine	105.043	1.274	C3H7NO3	#N/A	Metabolic pathways;Biosynthesis of secondary metabolites;Microbial metabolism in diverse environments;Biosynthesis of plant secondary metabolites;Biosynthesis of amino acids;ABC transporters;Other	rp
FAUX	105.05493@4.714-rp	#N/A	105.055	4.714	#N/A	#N/A	#N/A	rp
FAUX	105.05716@4.711-rp	#N/A	105.057	4.711	#N/A	#N/A	#N/A	rp
FAUX	4-Vinylpyridine@4.714-rp	4-Vinylpyridine	105.058	4.714	C7H7N	7221	#N/A	rp
FAUX	105.0678@1.04-rp	#N/A	105.068	1.04	#N/A	#N/A	#N/A	rp
FAUX	MFCD00084180@1.039-rp	MFCD00084180	105.069	1.039	C8H7D	10431536	#N/A	rp
FAUX	MFCD00084180@1.025-rp	MFCD00084180	105.069	1.025	C8H7D	10431536	#N/A	rp
FAUX	S-Methylthioglycolate@3.043-rp	S-Methylthioglycolate	106.009	3.043	C3H6O2S	#N/A	#N/A	rp
FAUX	D-Glycericacid;a-b-Hydroxypropionicacid@1.121-rp	D-Glycericacid;a-b-Hydroxypropionicacid	106.027	1.121	C3H6O4	#N/A	Metabolic pathways;Biosynthesis of secondary metabolites;Microbial metabolism in diverse environments;Other	rp
FAUX	Benzaldehyde@8.268-rp	Benzaldehyde	106.042	8.268	C7H6O	235	Metabolic pathways;Microbial metabolism in diverse environments;Degradation of aromatic compounds;Aminobenzoate degradation;Other	rp
FAUX	Benzaldehyde@12.43-rp	Benzaldehyde	106.042	12.43	C7H6O	235	Metabolic pathways;Microbial metabolism in diverse environments;Degradation of aromatic compounds;Aminobenzoate degradation;Other	rp
FAUX	Benzaldehyde@10.11-rp	Benzaldehyde	106.042	10.11	C7H6O	235	Metabolic pathways;Microbial metabolism in diverse environments;Degradation of aromatic compounds;Aminobenzoate degradation;Other	rp
FAUX	Benzaldehyde@1.465-rp	Benzaldehyde	106.042	1.465	C7H6O	235	Metabolic pathways;Microbial metabolism in diverse environments;Degradation of aromatic compounds;Aminobenzoate degradation;Other	rp
FAUX	4-Fluorobutanoicacid@1.464-rp	4-Fluorobutanoicacid	106.043	1.464	C4H7FO2	9982	#N/A	rp
FAUX	106.05812@1.047-rp	#N/A	106.058	1.047	#N/A	#N/A	#N/A	rp
FAUX	Ethylbenzene@14.351-rp	Ethylbenzene	106.078	14.351	C8H10	7219	Metabolic pathways;Microbial metabolism in diverse environments;Degradation of aromatic compounds;Other	rp
FAUX	Ethylbenzene@13.386-rp	Ethylbenzene	106.078	13.386	C8H10	7219	Metabolic pathways;Microbial metabolism in diverse environments;Degradation of aromatic compounds;Other	rp
FAUX	107.56352@1.04-rp	#N/A	107.564	1.04	#N/A	#N/A	#N/A	rp
FAUX	1-2-Benzoquinone@1.103-rp	1-2-Benzoquinone	108.021	1.103	C6H4O2	#N/A	Microbial metabolism in diverse environments;Aminobenzoate degradation	rp
FAUX	Anisole@8.206-rp	Anisole	108.058	8.206	C7H8O	7238	Metabolic pathways;Microbial metabolism in diverse environments;Degradation of aromatic compounds;Other	rp
FAUX	4-Methylphenol@6.025-rp	4-Methylphenol	108.058	6.025	C7H8O	#N/A	Metabolic pathways;Microbial metabolism in diverse environments;Degradation of aromatic compounds;Other	rp
FAUX	4-Methylphenol@6.323-rp	4-Methylphenol	108.058	6.323	C7H8O	#N/A	Metabolic pathways;Microbial metabolism in diverse environments;Degradation of aromatic compounds;Other	rp
FAUX	2-Aminophenol@1.296-rp	2-Aminophenol	109.053	1.296	C6H7NO	#N/A	Metabolic pathways;Microbial metabolism in diverse environments;Tryptophan metabolism;Aminobenzoate degradation	rp
FAUX	2-Aminophenol@6.225-rp	2-Aminophenol	109.053	6.225	C6H7NO	#N/A	Metabolic pathways;Microbial metabolism in diverse environments;Tryptophan metabolism;Aminobenzoate degradation	rp
FAUX	109.06341@1.047-rp	#N/A	109.063	1.047	#N/A	#N/A	#N/A	rp
FAUX	3,4-Diaminopyridine@1.029-rp	3,4-Diaminopyridine	109.064	1.029	C5H7N3	5705	#N/A	rp
FAUX	Methylmesylate@1.141-rp	Methylmesylate	110.004	1.141	C2H6O3S	4013	#N/A	rp
FAUX	Catechol;1-2-Dihydroxybenzene@6.281-rp	Catechol;1-2-Dihydroxybenzene	110.037	6.281	C6H6O2	#N/A	Metabolic pathways;Microbial metabolism in diverse environments;Degradation of aromatic compounds;Tyrosine metabolism;Aminobenzoate degradation;Other	rp
FAUX	Catechol;1-2-Dihydroxybenzene@1.16-rp	Catechol;1-2-Dihydroxybenzene	110.037	1.16	C6H6O2	#N/A	Metabolic pathways;Microbial metabolism in diverse environments;Degradation of aromatic compounds;Tyrosine metabolism;Aminobenzoate degradation;Other	rp
FAUX	Catechol;1-2-Dihydroxybenzene@3.072-rp	Catechol;1-2-Dihydroxybenzene	110.037	3.072	C6H6O2	#N/A	Metabolic pathways;Microbial metabolism in diverse environments;Degradation of aromatic compounds;Tyrosine metabolism;Aminobenzoate degradation;Other	rp
FAUX	Imidazole-4-acetaldehyde@1.053-rp	Imidazole-4-acetaldehyde	110.047	1.053	C5H6N2O	132948	#N/A	rp
FAUX	Imidazole-4-acetaldehyde@1.072-rp	Imidazole-4-acetaldehyde	110.048	1.072	C5H6N2O	132948	Metabolic pathways;Other	rp
FAUX	4,4-Dimethyl-1-hexyne@17.775-rp	4,4-Dimethyl-1-hexyne	110.109	17.775	C8H14	461263	#N/A	rp
FAUX	110.11044@15.054-rp	#N/A	110.11	15.054	#N/A	#N/A	#N/A	rp
FAUX	2-5-Dihydroxypyridine@1.807-rp	2-5-Dihydroxypyridine	111.032	1.807	C5H5NO2	#N/A	Metabolic pathways;Microbial metabolism in diverse environments;Other	rp
FAUX	111.04257@1.09-rp	#N/A	111.043	1.09	#N/A	#N/A	#N/A	rp
FAUX	Cytosine@1.467-rp	Cytosine	111.043	1.467	C4H5N3O	577	Metabolic pathways;Other	rp
FAUX	Cytosine@1.219-rp	Cytosine	111.043	1.219	C4H5N3O	577	Metabolic pathways;Other	rp
FAUX	Cytosine@1.081-rp	Cytosine	111.043	1.081	C4H5N3O	577	Metabolic pathways;Other	rp
FAUX	111.04393@1.47-rp	#N/A	111.044	1.47	#N/A	#N/A	Metabolic pathways;Other	rp
FAUX	111.04399@1.16-rp	#N/A	111.044	1.16	#N/A	#N/A	Metabolic pathways;Other	rp
FAUX	111.05027@1.203-rp	#N/A	111.05	1.203	#N/A	#N/A	#N/A	rp
FAUX	1-Vinyl-2-pyrrolidone@1.154-rp	1-Vinyl-2-pyrrolidone	111.068	1.154	C6H9NO	6651	#N/A	rp
FAUX	Histamine@0.86-rp	Histamine	111.08	0.86	C5H9N3	753	Metabolic pathways;Biosynthesis of secondary metabolites;Other	rp
FAUX	Histamine@0.944-rp	Histamine	111.08	0.944	C5H9N3	753	Metabolic pathways;Biosynthesis of secondary metabolites;Other	rp
FAUX	Monomethylsulfate@1.115-rp	Monomethylsulfate	111.983	1.115	CH4O4S	#N/A	#N/A	rp
FAUX	Hydroxymethylphosphonate@1.118-rp	Hydroxymethylphosphonate	111.993	1.118	CH5O4P	#N/A	Biosynthesis of secondary metabolites;Other	rp
FAUX	2-Furoate@1.026-rp	2-Furoate	112.016	1.026	C5H4O3	#N/A	Metabolic pathways;Microbial metabolism in diverse environments;Other	rp
FAUX	2-Furoate@1.492-rp	2-Furoate	112.016	1.492	C5H4O3	#N/A	Metabolic pathways;Microbial metabolism in diverse environments;Other	rp
FAUX	2-Furoate@1.272-rp	2-Furoate	112.016	1.272	C5H4O3	#N/A	Metabolic pathways;Microbial metabolism in diverse environments;Other	rp
FAUX	112.02667@1.102-rp	#N/A	112.027	1.102	#N/A	#N/A	#N/A	rp
FAUX	Uracil;2-4-Dihydroxypyrimidine@1.11-rp	Uracil;2-4-Dihydroxypyrimidine	112.027	1.11	C4H4N2O2	#N/A	Metabolic pathways;Other	rp
FAUX	Uracil;2-4-Dihydroxypyrimidine@3.16-rp	Uracil;2-4-Dihydroxypyrimidine	112.027	3.16	C4H4N2O2	#N/A	Metabolic pathways;Other	rp
FAUX	Uracil@1.758-rp	Uracil	112.027	1.758	C4H4N2O2	1141	Metabolic pathways;Other	rp
FAUX	Uracil@1.59-rp	Uracil	112.027	1.59	C4H4N2O2	1141	Metabolic pathways;Other	rp
FAUX	112.04514@1.06-rp	#N/A	112.045	1.06	#N/A	#N/A	#N/A	rp
FAUX	112.05176@1.681-rp	#N/A	112.052	1.681	#N/A	#N/A	#N/A	rp
FAUX	Arenediol@1.234-rp	Arenediol	112.053	1.234	C6H8O2	#N/A	Metabolic pathways;Microbial metabolism in diverse environments;Degradation of aromatic compounds;Aminobenzoate degradation;Other	rp
FAUX	4,5-Dihydro-6-methyl-3(2H)-pyridazinone@1.07-rp	4,5-Dihydro-6-methyl-3(2H)-pyridazinone	112.064	1.07	C5H8N2O	71169	#N/A	rp
FAUX	Phosgeneoxime@0.92-rp	Phosgeneoxime	112.944	0.92	CHCl2NO	59024	#N/A	rp
FAUX	XJ4375000@10.607-rp	XJ4375000	113.03	10.607	C5H7NS	10470	#N/A	rp
FAUX	XJ4375000@9.127-rp	XJ4375000	113.03	9.127	C5H7NS	10470	#N/A	rp
FAUX	XJ4375000@4.712-rp	XJ4375000	113.03	4.712	C5H7NS	10470	#N/A	rp
FAUX	(S)-1-Pyrroline-5-carboxylate@1.471-rp	(S)-1-Pyrroline-5-carboxylate	113.048	1.471	C5H7NO2	#N/A	Metabolic pathways;Biosynthesis of secondary metabolites;Biosynthesis of amino acids;Other	rp
FAUX	(S)-1-Pyrroline-5-carboxylate@1.678-rp	(S)-1-Pyrroline-5-carboxylate	113.048	1.678	C5H7NO2	#N/A	Metabolic pathways;Biosynthesis of secondary metabolites;Biosynthesis of amino acids;Other	rp
FAUX	(S)-1-Pyrroline-5-carboxylate@1.128-rp	(S)-1-Pyrroline-5-carboxylate	113.048	1.128	C5H7NO2	#N/A	Metabolic pathways;Biosynthesis of secondary metabolites;Biosynthesis of amino acids;Other	rp
FAUX	113.05526@4.711-rp	#N/A	113.055	4.711	#N/A	#N/A	#N/A	rp
FAUX	Creatinine@1.063-rp	Creatinine	113.059	1.063	C4H7N3O	568	Metabolic pathways;Other	rp
FAUX	Creatinine@1.217-rp	Creatinine	113.059	1.217	C4H7N3O	568	Metabolic pathways;Other	rp
FAUX	113.08323@1.13-rp	#N/A	113.083	1.13	#N/A	#N/A	#N/A	rp
FAUX	e-Caprolactam@1.107-rp	e-Caprolactam	113.084	1.107	C6H11NO	#N/A	Metabolic pathways;Microbial metabolism in diverse environments;Other	rp
FAUX	113.58174@1.037-rp	#N/A	113.582	1.037	#N/A	#N/A	#N/A	rp
FAUX	Thiosulficacid@0.963-rp	Thiosulficacid	113.945	0.963	H2O3S2	22886	#N/A	rp
FAUX	2-Hydroxy-2-4-pentadienoate@2.247-rp	2-Hydroxy-2-4-pentadienoate	114.032	2.247	C5H6O3	#N/A	Metabolic pathways;Microbial metabolism in diverse environments;Degradation of aromatic compounds;Phenylalanine metabolism;Other	rp
FAUX	2-Hydroxy-2-4-pentadienoate@3.015-rp	2-Hydroxy-2-4-pentadienoate	114.032	3.015	C5H6O3	#N/A	Metabolic pathways;Microbial metabolism in diverse environments;Degradation of aromatic compounds;Phenylalanine metabolism;Other	rp
FAUX	2-Hydroxy-2-4-pentadienoate@1.11-rp	2-Hydroxy-2-4-pentadienoate	114.032	1.11	C5H6O3	#N/A	Metabolic pathways;Microbial metabolism in diverse environments;Degradation of aromatic compounds;Phenylalanine metabolism;Other	rp
FAUX	2-Hydroxy-2-4-pentadienoate@1.483-rp	2-Hydroxy-2-4-pentadienoate	114.032	1.483	C5H6O3	#N/A	Metabolic pathways;Microbial metabolism in diverse environments;Degradation of aromatic compounds;Phenylalanine metabolism;Other	rp
FAUX	2-5-Dioxopiperazine@1.808-rp	2-5-Dioxopiperazine	114.043	1.808	C4H6N2O2	#N/A	Metabolic pathways;Biosynthesis of secondary metabolites;Other	rp
FAUX	3-Hydroxycyclohexanone@9.139-rp	3-Hydroxycyclohexanone	114.068	9.139	C6H10O2	388978	Microbial metabolism in diverse environments;Degradation of aromatic compounds;Other	rp
FAUX	formylpiperazine@1.038-rp	formylpiperazine	114.079	1.038	C5H10N2O	74173	#N/A	rp
FAUX	114.57042@1.059-rp	#N/A	114.57	1.059	#N/A	#N/A	#N/A	rp
FAUX	114.57143@1.047-rp	#N/A	114.571	1.047	#N/A	#N/A	#N/A	rp
FAUX	Maleamate@1.06-rp	Maleamate	115.027	1.06	C4H5NO3	#N/A	Metabolic pathways;Microbial metabolism in diverse environments;Other	rp
FAUX	115.04228@2.877-rp	#N/A	115.042	2.877	C8H5N	#N/A	#N/A	rp
FAUX	Butylisothiocyanate@21.897-rp	Butylisothiocyanate	115.046	21.897	C5H9NS	11124	#N/A	rp
FAUX	D-(+)-Proline@1.113-rp	D-(+)-Proline	115.063	1.113	C5H9NO2	#N/A	Metabolic pathways;Biosynthesis of secondary metabolites;Biosynthesis of amino acids;ABC transporters;Other	rp
FAUX	D-Proline@0.94-rp	D-Proline	115.063	0.94	C5H9NO2	#N/A	Metabolic pathways;Biosynthesis of secondary metabolites;Biosynthesis of amino acids;ABC transporters;Other	rp
FAUX	D-Proline@1.976-rp	D-Proline	115.063	1.976	C5H9NO2	#N/A	Metabolic pathways;Biosynthesis of secondary metabolites;Biosynthesis of amino acids;ABC transporters;Other	rp
FAUX	D-Proline@1.711-rp	D-Proline	115.063	1.711	C5H9NO2	#N/A	Metabolic pathways;Biosynthesis of secondary metabolites;Biosynthesis of amino acids;ABC transporters;Other	rp
FAUX	115.06461@1.119-rp	#N/A	115.065	1.119	#N/A	#N/A	#N/A	rp
FAUX	115.06466@1.493-rp	#N/A	115.065	1.493	#N/A	#N/A	#N/A	rp
FAUX	n-Hexanamide@1.095-rp	n-Hexanamide	115.1	1.095	C6H13NO	11827	#N/A	rp
FAUX	Fumaricacid@1.58-rp	Fumaricacid	116.011	1.58	C4H4O4	#N/A	Metabolic pathways;Biosynthesis of secondary metabolites;Microbial metabolism in diverse environments;Degradation of aromatic compounds;Biosynthesis of plant secondary metabolites;Biosynthesis of phenylpropanoids;Biosynthesis of alkaloids derived from shikimate pathway;Tyrosine metabolism;Phenylalanine metabolism;Biosynthesis of plant hormones;Other	rp
FAUX	Fumaricacid@1.225-rp	Fumaricacid	116.011	1.225	C4H4O4	#N/A	Metabolic pathways;Biosynthesis of secondary metabolites;Microbial metabolism in diverse environments;Degradation of aromatic compounds;Biosynthesis of plant secondary metabolites;Biosynthesis of phenylpropanoids;Biosynthesis of alkaloids derived from shikimate pathway;Tyrosine metabolism;Phenylalanine metabolism;Biosynthesis of plant hormones;Other	rp
FAUX	2-Oxovalericacid@1.175-rp	2-Oxovalericacid	116.047	1.175	C5H8O3	#N/A	Metabolic pathways;Biosynthesis of secondary metabolites;Microbial metabolism in diverse environments;Biosynthesis of amino acids;2-Oxocarboxylic acid metabolism;Other	rp
FAUX	Diacetylhydrazine@1.041-rp	Diacetylhydrazine	116.059	1.041	C4H8N2O2	#N/A	Other	rp
FAUX	Indene@8.797-rp	Indene	116.062	8.797	C9H8	6949	#N/A	rp
FAUX	Indene@8.358-rp	Indene	116.063	8.358	C9H8	6949	#N/A	rp
FAUX	4-hydroxy-4-methyl-2-pentanone@9.832-rp	4-hydroxy-4-methyl-2-pentanone	116.084	9.832	C6H12O2	#N/A	Microbial metabolism in diverse environments;Other	rp
FAUX	116.54015@1.053-rp	#N/A	116.54	1.053	#N/A	#N/A	#N/A	rp
FAUX	117.02765@0.894-rp	#N/A	117.028	0.894	#N/A	#N/A	#N/A	rp
FAUX	117.02864@0.894-rp	#N/A	117.029	0.894	CH3N5O2	#N/A	#N/A	rp
FAUX	L-2-Amino-3-oxobutanoicacid@1.067-rp	L-2-Amino-3-oxobutanoicacid	117.043	1.067	C4H7NO3	#N/A	Metabolic pathways;Biosynthesis of secondary metabolites;Microbial metabolism in diverse environments;Biosynthesis of amino acids;2-Oxocarboxylic acid metabolism;Other	rp
FAUX	117.04387@1.087-rp	#N/A	117.044	1.087	#N/A	#N/A	#N/A	rp
FAUX	117.04509@1.153-rp	#N/A	117.045	1.153	C3H8N3P	#N/A	#N/A	rp
FAUX	Guanidineaceticacid;Guanidoaceticacid@1.074-rp	Guanidineaceticacid;Guanidoaceticacid	117.054	1.074	C3H7N3O2	#N/A	Metabolic pathways;Other	rp
FAUX	117.05473@1.062-rp	#N/A	117.055	1.062	#N/A	#N/A	#N/A	rp
FAUX	3-hydroxyvalerate@1.052-rp	3-hydroxyvalerate	117.056	1.052	C5H9O3	10614323	#N/A	rp
FAUX	Indole;1-Benzazole@1.95-rp	Indole;1-Benzazole	117.058	1.95	C8H7N	#N/A	Metabolic pathways;Biosynthesis of secondary metabolites;Microbial metabolism in diverse environments;Tryptophan metabolism;Other	rp
FAUX	Indole;1-Benzazole@9.653-rp	Indole;1-Benzazole	117.058	9.653	C8H7N	#N/A	Metabolic pathways;Biosynthesis of secondary metabolites;Microbial metabolism in diverse environments;Tryptophan metabolism;Other	rp
FAUX	Indole;1-Benzazole@8.431-rp	Indole;1-Benzazole	117.058	8.431	C8H7N	#N/A	Metabolic pathways;Biosynthesis of secondary metabolites;Microbial metabolism in diverse environments;Tryptophan metabolism;Other	rp
FAUX	Indole;1-Benzazole@4.713-rp	Indole;1-Benzazole	117.058	4.713	C8H7N	#N/A	Metabolic pathways;Biosynthesis of secondary metabolites;Microbial metabolism in diverse environments;Tryptophan metabolism;Other	rp
FAUX	Indole;1-Benzazole@7.622-rp	Indole;1-Benzazole	117.058	7.622	C8H7N	#N/A	Metabolic pathways;Biosynthesis of secondary metabolites;Microbial metabolism in diverse environments;Tryptophan metabolism;Other	rp
FAUX	Indole;1-Benzazole@3.127-rp	Indole;1-Benzazole	117.058	3.127	C8H7N	#N/A	Metabolic pathways;Biosynthesis of secondary metabolites;Microbial metabolism in diverse environments;Tryptophan metabolism;Other	rp
FAUX	Indole;1-Benzazole@1.502-rp	Indole;1-Benzazole	117.058	1.502	C8H7N	#N/A	Metabolic pathways;Biosynthesis of secondary metabolites;Microbial metabolism in diverse environments;Tryptophan metabolism;Other	rp
FAUX	Indole;1-Benzazole@5.356-rp	Indole;1-Benzazole	117.058	5.356	C8H7N	#N/A	Metabolic pathways;Biosynthesis of secondary metabolites;Microbial metabolism in diverse environments;Tryptophan metabolism;Other	rp
FAUX	117.05853@1.476-rp	#N/A	117.059	1.476	#N/A	#N/A	#N/A	rp
FAUX	117.07823@1.066-rp	#N/A	117.078	1.066	#N/A	#N/A	Metabolic pathways;Biosynthesis of secondary metabolites;Microbial metabolism in diverse environments;Biosynthesis of plant secondary metabolites;Biosynthesis of amino acids;2-Oxocarboxylic acid metabolism;Biosynthesis of alkaloids derived from shikimate pathway;ABC transporters;Other	rp
FAUX	5-Aminovalericacid@1.081-rp	5-Aminovalericacid	117.079	1.081	C5H11NO2	#N/A	Metabolic pathways;Biosynthesis of secondary metabolites;Microbial metabolism in diverse environments;Biosynthesis of plant secondary metabolites;Biosynthesis of amino acids;2-Oxocarboxylic acid metabolism;Biosynthesis of alkaloids derived from shikimate pathway;ABC transporters;Other	rp
FAUX	Valine@4.003-rp	Valine	117.079	4.003	C5H11NO2	#N/A	Metabolic pathways;Biosynthesis of secondary metabolites;Microbial metabolism in diverse environments;Biosynthesis of plant secondary metabolites;Biosynthesis of amino acids;2-Oxocarboxylic acid metabolism;Biosynthesis of alkaloids derived from shikimate pathway;ABC transporters;Other	rp
FAUX	Valine@3.264-rp	Valine	117.079	3.264	C5H11NO2	#N/A	Metabolic pathways;Biosynthesis of secondary metabolites;Microbial metabolism in diverse environments;Biosynthesis of plant secondary metabolites;Biosynthesis of amino acids;2-Oxocarboxylic acid metabolism;Biosynthesis of alkaloids derived from shikimate pathway;ABC transporters;Other	rp
FAUX	117.57166@4.849-rp	#N/A	117.572	4.849	#N/A	#N/A	#N/A	rp
FAUX	1-Chloro-1,2,2-trifluoroethane@0.998-rp	1-Chloro-1,2,2-trifluoroethane	117.98	0.998	C2H2ClF3	83736	#N/A	rp
FAUX	118.01175@0.892-rp	#N/A	118.012	0.892	#N/A	#N/A	#N/A	rp
FAUX	Methylmalonicacid@1.588-rp	Methylmalonicacid	118.027	1.588	C4H6O4	473	Metabolic pathways;Biosynthesis of secondary metabolites;Microbial metabolism in diverse environments;Degradation of aromatic compounds;Biosynthesis of plant secondary metabolites;Biosynthesis of phenylpropanoids;Biosynthesis of alkaloids derived from shikimate pathway;Tyrosine metabolism;Phenylalanine metabolism;Biosynthesis of plant hormones;Other	rp
FAUX	4,5-Dicyanoimidazole@1.6-rp	4,5-Dicyanoimidazole	118.027	1.6	C5H2N4	63894	#N/A	rp
FAUX	Adenine@2.195-rp	Adenine	118.028	2.195	C5H5N5	185	#N/A	rp
FAUX	4,5-Dicyanoimidazole@2.487-rp	4,5-Dicyanoimidazole	118.028	2.487	C5H2N4	63894	#N/A	rp
FAUX	Coumarone@1.493-rp	Coumarone	118.042	1.493	C8H6O	8868	#N/A	rp
FAUX	Coumarone@7.069-rp	Coumarone	118.042	7.069	C8H6O	8868	#N/A	rp
FAUX	2-Methyl-3-hydroxybutyricacid@2.112-rp	2-Methyl-3-hydroxybutyricacid	118.063	2.112	C5H10O3	#N/A	Metabolic pathways;Other	rp
FAUX	2-Methyl-3-hydroxybutyricacid@2.219-rp	2-Methyl-3-hydroxybutyricacid	118.063	2.219	C5H10O3	#N/A	Metabolic pathways;Other	rp
FAUX	2-Methyl-3-hydroxybutyricacid@2.609-rp	2-Methyl-3-hydroxybutyricacid	118.063	2.609	C5H10O3	#N/A	Metabolic pathways;Other	rp
FAUX	Indane@8.797-rp	Indane	118.078	8.797	C9H10	9903	#N/A	rp
FAUX	Indane@16.258-rp	Indane	118.078	16.258	C9H10	9903	#N/A	rp
FAUX	Indane@8.461-rp	Indane	118.078	8.461	C9H10	9903	#N/A	rp
FAUX	Indane@9.136-rp	Indane	118.078	9.136	C9H10	9903	#N/A	rp
FAUX	119.01251@0.893-rp	#N/A	119.013	0.893	C5HN3O	#N/A	#N/A	rp
FAUX	119.01336@1.596-rp	#N/A	119.013	1.596	C3H6NO2P	#N/A	#N/A	rp
FAUX	119.01456@1.589-rp	#N/A	119.015	1.589	#N/A	#N/A	#N/A	rp
FAUX	Benzoxazole@4.449-rp	Benzoxazole	119.037	4.449	C7H5NO	8873	#N/A	rp
FAUX	Benzoxazole@6.586-rp	Benzoxazole	119.037	6.586	C7H5NO	8873	#N/A	rp
FAUX	Benzoxazole@6.229-rp	Benzoxazole	119.037	6.229	C7H5NO	8873	#N/A	rp
FAUX	2-Methylserine@1.524-rp	2-Methylserine	119.058	1.524	C4H9NO3	85112	Metabolic pathways;Biosynthesis of secondary metabolites;Microbial metabolism in diverse environments;Biosynthesis of plant secondary metabolites;Biosynthesis of amino acids;ABC transporters;Other	rp
FAUX	2-Methylserine@1.051-rp	2-Methylserine	119.058	1.051	C4H9NO3	85112	Metabolic pathways;Biosynthesis of secondary metabolites;Microbial metabolism in diverse environments;Biosynthesis of plant secondary metabolites;Biosynthesis of amino acids;ABC transporters;Other	rp
FAUX	Indoline@3.431-rp	Indoline	119.074	3.431	C8H9N	9905	#N/A	rp
FAUX	3-Methyl-4-vinylpyridine@1.947-rp	3-Methyl-4-vinylpyridine	119.074	1.947	C8H9N	13465470	#N/A	rp
FAUX	Indoline@6.452-rp	Indoline	119.074	6.452	C8H9N	9905	#N/A	rp
FAUX	Indoline@7.009-rp	Indoline	119.074	7.009	C8H9N	9905	#N/A	rp
FAUX	Indoline@8.136-rp	Indoline	119.074	8.136	C8H9N	9905	#N/A	rp
FAUX	Indoline@7.524-rp	Indoline	119.074	7.524	C8H9N	9905	#N/A	rp
FAUX	Indoline@1.477-rp	Indoline	119.074	1.477	C8H9N	9905	#N/A	rp
FAUX	506020@1.02-rp	506020	119.095	1.02	C5H13NO2	70742	#N/A	rp
FAUX	119.56362@1.052-rp	#N/A	119.564	1.052	#N/A	#N/A	#N/A	rp
FAUX	119.9496@0.973-rp	#N/A	119.95	0.973	#N/A	#N/A	#N/A	rp
FAUX	119.95905@0.985-rp	#N/A	119.959	0.985	#N/A	#N/A	#N/A	rp
FAUX	120.00926@0.893-rp	#N/A	120.009	0.893	C2H5N2O2P	#N/A	#N/A	rp
FAUX	3-(Methylthio)propionicacid@3.763-rp	3-(Methylthio)propionicacid	120.025	3.763	C4H8O2S	#N/A	Metabolic pathways;Other	rp
FAUX	2-hydroxynicotinonitrile@1.469-rp	2-hydroxynicotinonitrile	120.032	1.469	C6H4N2O	502058	#N/A	rp
FAUX	D-(-)-Erythrose;L-Threose@3.452-rp	D-(-)-Erythrose;L-Threose	120.042	3.452	C4H8O4	#N/A	#N/A	rp
FAUX	D-(-)-Fructose@1.185-rp	D-(-)-Fructose	120.042	1.185	C6H12O6	#N/A	#N/A	rp
FAUX	Phenylacetaldehyde@12.432-rp	Phenylacetaldehyde	120.058	12.432	C8H8O	13876539	Metabolic pathways;Microbial metabolism in diverse environments;Degradation of aromatic compounds;Phenylpropanoid biosynthesis;Phenylalanine metabolism;Other	rp
FAUX	Phenylacetaldehyde@6.291-rp	Phenylacetaldehyde	120.058	6.291	C8H8O	13876539	Metabolic pathways;Microbial metabolism in diverse environments;Degradation of aromatic compounds;Phenylpropanoid biosynthesis;Phenylalanine metabolism;Other	rp
FAUX	Phenylacetaldehyde@6.58-rp	Phenylacetaldehyde	120.058	6.58	C8H8O	13876539	Metabolic pathways;Microbial metabolism in diverse environments;Degradation of aromatic compounds;Phenylpropanoid biosynthesis;Phenylalanine metabolism;Other	rp
FAUX	Phenylacetaldehyde@8.212-rp	Phenylacetaldehyde	120.058	8.212	C8H8O	13876539	Metabolic pathways;Microbial metabolism in diverse environments;Degradation of aromatic compounds;Phenylpropanoid biosynthesis;Phenylalanine metabolism;Other	rp
FAUX	Phenylacetaldehyde@7.836-rp	Phenylacetaldehyde	120.058	7.836	C8H8O	13876539	Metabolic pathways;Microbial metabolism in diverse environments;Degradation of aromatic compounds;Phenylpropanoid biosynthesis;Phenylalanine metabolism;Other	rp
FAUX	3-Phenyllacticacid@7.068-rp	3-Phenyllacticacid	120.058	7.068	C9H10O3	#N/A	Metabolic pathways;Microbial metabolism in diverse environments;Degradation of aromatic compounds;Phenylpropanoid biosynthesis;Phenylalanine metabolism;Other	rp
FAUX	Phenylacetaldehyde@8.774-rp	Phenylacetaldehyde	120.058	8.774	C8H8O	13876539	Metabolic pathways;Microbial metabolism in diverse environments;Degradation of aromatic compounds;Phenylpropanoid biosynthesis;Phenylalanine metabolism;Other	rp
FAUX	Phenylacetaldehyde@4.396-rp	Phenylacetaldehyde	120.058	4.396	C8H8O	13876539	Metabolic pathways;Microbial metabolism in diverse environments;Degradation of aromatic compounds;Phenylpropanoid biosynthesis;Phenylalanine metabolism;Other	rp
FAUX	Phenylacetaldehyde@1.478-rp	Phenylacetaldehyde	120.058	1.478	C8H8O	13876539	Metabolic pathways;Microbial metabolism in diverse environments;Degradation of aromatic compounds;Phenylpropanoid biosynthesis;Phenylalanine metabolism;Other	rp
FAUX	Phenylacetaldehyde@9.105-rp	Phenylacetaldehyde	120.058	9.105	C8H8O	13876539	Metabolic pathways;Microbial metabolism in diverse environments;Degradation of aromatic compounds;Phenylpropanoid biosynthesis;Phenylalanine metabolism;Other	rp
FAUX	1-2-4-Trimethylbenzene@13.393-rp	1-2-4-Trimethylbenzene	120.094	13.393	C9H12	#N/A	#N/A	rp
FAUX	1-2-4-Trimethylbenzene@16.252-rp	1-2-4-Trimethylbenzene	120.094	16.252	C9H12	#N/A	#N/A	rp
FAUX	1-2-4-Trimethylbenzene@8.463-rp	1-2-4-Trimethylbenzene	120.094	8.463	C9H12	#N/A	#N/A	rp
FAUX	2IMH4383Z4@2.617-rp	2IMH4383Z4	121.002	2.617	C3H7NS2	6349	#N/A	rp
FAUX	Benzamide@1.48-rp	Benzamide	121.053	1.48	C7H7NO	2241	Microbial metabolism in diverse environments;Aminobenzoate degradation	rp
FAUX	121.56693@1.048-rp	#N/A	121.567	1.048	#N/A	#N/A	#N/A	rp
FAUX	3-Mercaptolactate@7.27-rp	3-Mercaptolactate	122.004	7.27	C3H6O3S	#N/A	Metabolic pathways;Other	rp
FAUX	3-Mercaptolactate@1.429-rp	3-Mercaptolactate	122.004	1.429	C3H6O3S	#N/A	Metabolic pathways;Other	rp
FAUX	(Nitroimino)dimethanol@0.9-rp	(Nitroimino)dimethanol	122.033	0.9	C2H6N2O4	7822124	#N/A	rp
FAUX	4-Hydroxybenzaldehyde@10.308-rp	4-Hydroxybenzaldehyde	122.037	10.308	C7H6O2	123	Metabolic pathways;Biosynthesis of secondary metabolites;Microbial metabolism in diverse environments;Degradation of aromatic compounds;Biosynthesis of phenylpropanoids;Biosynthesis of alkaloids derived from shikimate pathway;Phenylalanine metabolism;Aminobenzoate degradation;Other	rp
FAUX	4-Hydroxybenzaldehyde@3.943-rp	4-Hydroxybenzaldehyde	122.037	3.943	C7H6O2	123	Metabolic pathways;Biosynthesis of secondary metabolites;Microbial metabolism in diverse environments;Degradation of aromatic compounds;Biosynthesis of phenylpropanoids;Biosynthesis of alkaloids derived from shikimate pathway;Phenylalanine metabolism;Aminobenzoate degradation;Other	rp
FAUX	4-Hydroxybenzaldehyde@6.08-rp	4-Hydroxybenzaldehyde	122.037	6.08	C7H6O2	123	Metabolic pathways;Biosynthesis of secondary metabolites;Microbial metabolism in diverse environments;Degradation of aromatic compounds;Biosynthesis of phenylpropanoids;Biosynthesis of alkaloids derived from shikimate pathway;Phenylalanine metabolism;Aminobenzoate degradation;Other	rp
FAUX	4-Hydroxybenzaldehyde@12.434-rp	4-Hydroxybenzaldehyde	122.037	12.434	C7H6O2	123	Metabolic pathways;Biosynthesis of secondary metabolites;Microbial metabolism in diverse environments;Degradation of aromatic compounds;Biosynthesis of phenylpropanoids;Biosynthesis of alkaloids derived from shikimate pathway;Phenylalanine metabolism;Aminobenzoate degradation;Other	rp
FAUX	Benzoicacid@6.282-rp	Benzoicacid	122.037	6.282	C7H6O2	238	Metabolic pathways;Biosynthesis of secondary metabolites;Microbial metabolism in diverse environments;Degradation of aromatic compounds;Biosynthesis of phenylpropanoids;Biosynthesis of alkaloids derived from shikimate pathway;Phenylalanine metabolism;Aminobenzoate degradation;Other	rp
FAUX	Nicotinamide@1.862-rp	Nicotinamide	122.048	1.862	C6H6N2O	911	Metabolic pathways;Other	rp
FAUX	Nicotinamide@2.437-rp	Nicotinamide	122.048	2.437	C6H6N2O	911	Metabolic pathways;Other	rp
FAUX	Nicotinamide@1.124-rp	Nicotinamide	122.048	1.124	C6H6N2O	911	Metabolic pathways;Other	rp
FAUX	Nicotinamide@5.065-rp	Nicotinamide	122.048	5.065	C6H6N2O	911	Metabolic pathways;Other	rp
FAUX	122.07176@28.965-rp	#N/A	122.072	28.965	#N/A	#N/A	#N/A	rp
FAUX	2,5-Dimethylphenol@8.22-rp	2,5-Dimethylphenol	122.073	8.22	C8H10O	#N/A	Metabolic pathways;Microbial metabolism in diverse environments;Degradation of aromatic compounds;Phenylalanine metabolism;Other	rp
FAUX	122.5862@1.106-rp	#N/A	122.586	1.106	#N/A	#N/A	#N/A	rp
FAUX	122.58711@1.03-rp	#N/A	122.587	1.03	#N/A	#N/A	#N/A	rp
FAUX	122.58761@1.05-rp	#N/A	122.588	1.05	#N/A	#N/A	#N/A	rp
FAUX	122.9673@0.933-rp	#N/A	122.967	0.933	#N/A	#N/A	#N/A	rp
FAUX	1,2,3-Oxathiazolidine2,2-dioxide@1.053-rp	1,2,3-Oxathiazolidine2,2-dioxide	122.999	1.053	C2H5NO3S	14464401	#N/A	rp
FAUX	123.01717@0.893-rp	#N/A	123.017	0.893	#N/A	#N/A	#N/A	rp
FAUX	Nicotinicacid@1.639-rp	Nicotinicacid	123.032	1.639	C6H5NO2	#N/A	Metabolic pathways;Biosynthesis of secondary metabolites;Microbial metabolism in diverse environments;Degradation of aromatic compounds;Biosynthesis of plant secondary metabolites;Tryptophan metabolism;Aminobenzoate degradation;Other	rp
FAUX	123.03385@0.895-rp	#N/A	123.034	0.895	#N/A	#N/A	#N/A	rp
FAUX	Propan-2-sulfonamid@0.884-rp	Propan-2-sulfonamid	123.035	0.884	C3H9NO2S	2787256	#N/A	rp
FAUX	123.06716@1.48-rp	#N/A	123.067	1.48	#N/A	#N/A	#N/A	rp
FAUX	123.06758@1.108-rp	#N/A	123.068	1.108	#N/A	#N/A	#N/A	rp
FAUX	4-Methoxyaniline@1.459-rp	4-Methoxyaniline	123.068	1.459	C7H9NO	13869414	#N/A	rp
FAUX	3-Pyridylethanol@1.475-rp	3-Pyridylethanol	123.069	1.475	C7H9NO	91429	#N/A	rp
FAUX	2,5,6,7-Tetrahydro-3H-pyrrolizin-3-one@1.095-rp	2,5,6,7-Tetrahydro-3H-pyrrolizin-3-one	123.069	1.095	C7H9NO	9346056	#N/A	rp
FAUX	UV6260496@0.97-rp	UV6260496	123.08	0.97	C6H9N3	12480	#N/A	rp
FAUX	Sulfoacetaldehyde@1.103-rp	Sulfoacetaldehyde	123.983	1.103	C2H4O4S	#N/A	Metabolic pathways;Microbial metabolism in diverse environments;Other	rp
FAUX	124.01429@0.893-rp	#N/A	124.014	0.893	#N/A	#N/A	#N/A	rp
FAUX	Hydroxybenzoquinone@1.121-rp	Hydroxybenzoquinone	124.016	1.121	C6H4O3	#N/A	Metabolic pathways;Microbial metabolism in diverse environments;Aminobenzoate degradation;Other	rp
FAUX	124.01799@0.893-rp	#N/A	124.018	0.893	#N/A	#N/A	#N/A	rp
FAUX	1-Mercaptoglycerol@0.893-rp	1-Mercaptoglycerol	124.019	0.893	C3H8O3S	35032508	#N/A	rp
FAUX	124.0355@1.642-rp	#N/A	124.035	1.642	#N/A	#N/A	#N/A	rp
FAUX	3-Methylcatechol;3-Methyl-1-2-benzenediol@6.605-rp	3-Methylcatechol;3-Methyl-1-2-benzenediol	124.052	6.605	C7H8O2	#N/A	Metabolic pathways;Microbial metabolism in diverse environments;Degradation of aromatic compounds;Aminobenzoate degradation;Other	rp
FAUX	3-Methylcatechol;3-Methyl-1-2-benzenediol@14.299-rp	3-Methylcatechol;3-Methyl-1-2-benzenediol	124.052	14.299	C7H8O2	#N/A	Metabolic pathways;Microbial metabolism in diverse environments;Degradation of aromatic compounds;Aminobenzoate degradation;Other	rp
FAUX	3-Hydroxybenzylalcohol@3.946-rp	3-Hydroxybenzylalcohol	124.053	3.946	C7H8O2	#N/A	Metabolic pathways;Microbial metabolism in diverse environments;Degradation of aromatic compounds;Aminobenzoate degradation;Other	rp
FAUX	3-Methylcatechol;3-Methyl-1-2-benzenediol@3.582-rp	3-Methylcatechol;3-Methyl-1-2-benzenediol	124.053	3.582	C7H8O2	#N/A	Metabolic pathways;Microbial metabolism in diverse environments;Degradation of aromatic compounds;Aminobenzoate degradation;Other	rp
FAUX	3-Methylcatechol;3-Methyl-1-2-benzenediol@6.026-rp	3-Methylcatechol;3-Methyl-1-2-benzenediol	124.053	6.026	C7H8O2	#N/A	Metabolic pathways;Microbial metabolism in diverse environments;Degradation of aromatic compounds;Aminobenzoate degradation;Other	rp
FAUX	3-Methylcatechol;3-Methyl-1-2-benzenediol@1.478-rp	3-Methylcatechol;3-Methyl-1-2-benzenediol	124.053	1.478	C7H8O2	#N/A	Metabolic pathways;Microbial metabolism in diverse environments;Degradation of aromatic compounds;Aminobenzoate degradation;Other	rp
FAUX	3-Methylcatechol;3-Methyl-1-2-benzenediol@6.804-rp	3-Methylcatechol;3-Methyl-1-2-benzenediol	124.053	6.804	C7H8O2	#N/A	Metabolic pathways;Microbial metabolism in diverse environments;Degradation of aromatic compounds;Aminobenzoate degradation;Other	rp
FAUX	Methylimidazoleacetaldehyde@1.041-rp	Methylimidazoleacetaldehyde	124.063	1.041	C6H8N2O	#N/A	Metabolic pathways;Other	rp
FAUX	Methylimidazoleacetaldehyde@2.285-rp	Methylimidazoleacetaldehyde	124.064	2.285	C6H8N2O	#N/A	Metabolic pathways;Other	rp
FAUX	Methylimidazoleacetaldehyde@2.666-rp	Methylimidazoleacetaldehyde	124.064	2.666	C6H8N2O	#N/A	Metabolic pathways;Other	rp
FAUX	Methylimidazoleacetaldehyde@1.132-rp	Methylimidazoleacetaldehyde	124.064	1.132	C6H8N2O	#N/A	Metabolic pathways;Other	rp
FAUX	GV9100000@9.894-rp	GV9100000	124.089	9.894	C8H12O	6277	#N/A	rp
FAUX	3-Ethyl-1-heptyne@17.774-rp	3-Ethyl-1-heptyne	124.125	17.774	C9H16	9587260	#N/A	rp
FAUX	125.01338@1.44-rp	#N/A	125.013	1.44	#N/A	#N/A	#N/A	rp
FAUX	125.01466@0.889-rp	#N/A	125.015	0.889	C4H4N3P	#N/A	Metabolic pathways;ABC transporters;Other	rp
FAUX	Taurine@2.059-rp	Taurine	125.015	2.059	C2H7NO3S	1091	Metabolic pathways;ABC transporters;Other	rp
FAUX	Taurine@1.047-rp	Taurine	125.015	1.047	C2H7NO3S	1091	Metabolic pathways;ABC transporters;Other	rp
FAUX	125.04689@1.78-rp	#N/A	125.047	1.78	#N/A	#N/A	Biosynthesis of secondary metabolites;Microbial metabolism in diverse environments;Aminobenzoate degradation;Other	rp
FAUX	3-Hydroxyaminophenol@1.174-rp	3-Hydroxyaminophenol	125.048	1.174	C6H7NO2	#N/A	Biosynthesis of secondary metabolites;Microbial metabolism in diverse environments;Aminobenzoate degradation;Other	rp
FAUX	3-Hydroxyaminophenol@4.397-rp	3-Hydroxyaminophenol	125.048	4.397	C6H7NO2	#N/A	Biosynthesis of secondary metabolites;Microbial metabolism in diverse environments;Aminobenzoate degradation;Other	rp
FAUX	5-Methylcytosine@1.191-rp	5-Methylcytosine	125.059	1.191	C5H7N3O	58551	Metabolic pathways;Other	rp
FAUX	5-Methylcytosine@1.478-rp	5-Methylcytosine	125.059	1.478	C5H7N3O	58551	Metabolic pathways;Other	rp
FAUX	NQ8650000@1.271-rp	NQ8650000	125.084	1.271	C7H11NO	17475	#N/A	rp
FAUX	2-Hydroxyethanesulfonate@1.105-rp	2-Hydroxyethanesulfonate	125.999	1.105	C2H6O4S	#N/A	Metabolic pathways;Other	rp
FAUX	125.99967@1.103-rp	#N/A	126	1.103	C2H8O2P2	#N/A	#N/A	rp
FAUX	3-Hydroxy-2-methyl-4-pyrone@5.277-rp	3-Hydroxy-2-methyl-4-pyrone	126.032	5.277	C6H6O3	#N/A	Metabolic pathways;Biosynthesis of secondary metabolites;Microbial metabolism in diverse environments;Aminobenzoate degradation;Other	rp
FAUX	3-Hydroxy-2-methyl-4-pyrone@1.106-rp	3-Hydroxy-2-methyl-4-pyrone	126.032	1.106	C6H6O3	#N/A	Metabolic pathways;Biosynthesis of secondary metabolites;Microbial metabolism in diverse environments;Aminobenzoate degradation;Other	rp
FAUX	3-Hydroxy-2-methyl-4-pyrone@1.248-rp	3-Hydroxy-2-methyl-4-pyrone	126.032	1.248	C6H6O3	#N/A	Metabolic pathways;Biosynthesis of secondary metabolites;Microbial metabolism in diverse environments;Aminobenzoate degradation;Other	rp
FAUX	3-Hydroxy-2-methyl-4-pyrone@1.484-rp	3-Hydroxy-2-methyl-4-pyrone	126.032	1.484	C6H6O3	#N/A	Metabolic pathways;Biosynthesis of secondary metabolites;Microbial metabolism in diverse environments;Aminobenzoate degradation;Other	rp
FAUX	3-Hydroxy-2-methyl-4-pyrone@1.955-rp	3-Hydroxy-2-methyl-4-pyrone	126.032	1.955	C6H6O3	#N/A	Metabolic pathways;Biosynthesis of secondary metabolites;Microbial metabolism in diverse environments;Aminobenzoate degradation;Other	rp
FAUX	Thymine@4.167-rp	Thymine	126.043	4.167	C5H6N2O2	1103	Metabolic pathways;Other	rp
FAUX	Imidazoleaceticacid@1.072-rp	Imidazoleaceticacid	126.043	1.072	C5H6N2O2	#N/A	Metabolic pathways;Other	rp
FAUX	Imidazoleaceticacid@2.389-rp	Imidazoleaceticacid	126.043	2.389	C5H6N2O2	#N/A	Metabolic pathways;Other	rp
FAUX	126.06114@1.131-rp	#N/A	126.061	1.131	#N/A	#N/A	#N/A	rp
FAUX	126.07799@1.157-rp	#N/A	126.078	1.157	#N/A	#N/A	#N/A	rp
FAUX	2-tert-butyl-1,3,4-oxadiazole@1.145-rp	2-tert-butyl-1,3,4-oxadiazole	126.079	1.145	C6H10N2O	9587264	#N/A	rp
FAUX	Sulcatone@8.019-rp	Sulcatone	126.105	8.019	C8H14O	#N/A	Metabolic pathways;Biosynthesis of secondary metabolites;Other	rp
FAUX	127.01203@0.891-rp	#N/A	127.012	0.891	#N/A	#N/A	#N/A	rp
FAUX	2-3-6-Trihydroxypyridine@1.139-rp	2-3-6-Trihydroxypyridine	127.027	1.139	C5H5NO3	#N/A	Microbial metabolism in diverse environments;Other	rp
FAUX	4-Ethynylbenzonitrile@7.622-rp	4-Ethynylbenzonitrile	127.042	7.622	C9H5N	3741215	#N/A	rp
FAUX	2-Thiopheneethylamine@1.465-rp	2-Thiopheneethylamine	127.045	1.465	C6H9NS	104173	#N/A	rp
FAUX	?-(Methylenecyclopropyl)glycine@1.182-rp	?-(Methylenecyclopropyl)glycine	127.063	1.182	C6H9NO2	#N/A	#N/A	rp
FAUX	?-(Methylenecyclopropyl)glycine@1.484-rp	?-(Methylenecyclopropyl)glycine	127.063	1.484	C6H9NO2	#N/A	Metabolic pathways;Biosynthesis of secondary metabolites;Biosynthesis of plant secondary metabolites;Other	rp
FAUX	?-(Methylenecyclopropyl)glycine@1.149-rp	?-(Methylenecyclopropyl)glycine	127.063	1.149	C6H9NO2	#N/A	Metabolic pathways;Biosynthesis of secondary metabolites;Biosynthesis of plant secondary metabolites;Other	rp
FAUX	?-(Methylenecyclopropyl)glycine@3.456-rp	?-(Methylenecyclopropyl)glycine	127.064	3.456	C6H9NO2	#N/A	Metabolic pathways;Biosynthesis of secondary metabolites;Biosynthesis of plant secondary metabolites;Other	rp
FAUX	127.06449@1.473-rp	#N/A	127.064	1.473	#N/A	#N/A	#N/A	rp
FAUX	4H-1,2,4-Trizaole-4-propanol@1.197-rp	4H-1,2,4-Trizaole-4-propanol	127.075	1.197	C5H9N3O	17929303	#N/A	rp
FAUX	Acetyl-?-methylcholine@1.257-rp	Acetyl-?-methylcholine	127.1	1.257	C8H17NO2	#N/A	Microbial metabolism in diverse environments;Other	rp
FAUX	Methyltrifluoroacetate@0.971-rp	Methyltrifluoroacetate	128.009	0.971	C3H3F3O2	9509	#N/A	rp
FAUX	128.01861@1.584-rp	#N/A	128.019	1.584	#N/A	#N/A	#N/A	rp
FAUX	128.01997@1.587-rp	#N/A	128.02	1.587	#N/A	#N/A	#N/A	rp
FAUX	128.0466@1.184-rp	#N/A	128.047	1.184	#N/A	#N/A	#N/A	rp
FAUX	(4E)-2-Oxohexenoicacid@1.152-rp	(4E)-2-Oxohexenoicacid	128.047	1.152	C6H8O3	#N/A	Metabolic pathways;Microbial metabolism in diverse environments;Degradation of aromatic compounds;Aminobenzoate degradation;Other	rp
FAUX	Dihydrothymine@2.03-rp	Dihydrothymine	128.059	2.03	C5H8N2O2	84456	Metabolic pathways;Other	rp
FAUX	Dihydrothymine@1.055-rp	Dihydrothymine	128.059	1.055	C5H8N2O2	84456	Metabolic pathways;Other	rp
FAUX	Dihydrothymine@3.68-rp	Dihydrothymine	128.059	3.68	C5H8N2O2	84456	Metabolic pathways;Other	rp
FAUX	Dihydrothymine@1.251-rp	Dihydrothymine	128.059	1.251	C5H8N2O2	84456	Metabolic pathways;Other	rp
FAUX	Naphthalene@8.415-rp	Naphthalene	128.063	8.415	C10H8	906	Metabolic pathways;Microbial metabolism in diverse environments;Degradation of aromatic compounds;Other	rp
FAUX	3-isopropyl-3-butenoicacid@2.207-rp	3-isopropyl-3-butenoicacid	128.084	2.207	C7H12O2	#N/A	Metabolic pathways;Microbial metabolism in diverse environments;Other	rp
FAUX	D-2-Amino-hexano-6-lactam@1.09-rp	D-2-Amino-hexano-6-lactam	128.095	1.09	C6H12N2O	#N/A	#N/A	rp
FAUX	D-2-Amino-hexano-6-lactam@1.478-rp	D-2-Amino-hexano-6-lactam	128.095	1.478	C6H12N2O	#N/A	#N/A	rp
FAUX	SulpirideimpurityA@8.361-rp	SulpirideimpurityA	128.131	8.361	C7H16N2	104820	#N/A	rp
FAUX	2-(2-Aminoethyl)-1-methylpyrrolidine@1.466-rp	2-(2-Aminoethyl)-1-methylpyrrolidine	128.131	1.466	C7H16N2	88845	#N/A	rp
FAUX	128.56887@1.043-rp	#N/A	128.569	1.043	#N/A	#N/A	#N/A	rp
FAUX	129.0041@0.968-rp	#N/A	129.004	0.968	#N/A	#N/A	#N/A	rp
FAUX	129.00485@0.949-rp	#N/A	129.005	0.949	#N/A	#N/A	#N/A	rp
FAUX	Goitrin@4.015-rp	Goitrin	129.025	4.015	C5H7NOS	2299106	#N/A	rp
FAUX	1-Pyrroline-4-hydroxy-2-carboxylate@3.392-rp	1-Pyrroline-4-hydroxy-2-carboxylate	129.043	3.392	C5H7NO3	#N/A	Metabolic pathways;Biosynthesis of secondary metabolites;Other	rp
FAUX	4-Oxoproline@1.496-rp	4-Oxoproline	129.043	1.496	C5H7NO3	366185	Metabolic pathways;Biosynthesis of secondary metabolites;Other	rp
FAUX	4-Oxoproline@1.873-rp	4-Oxoproline	129.043	1.873	C5H7NO3	366185	Metabolic pathways;Biosynthesis of secondary metabolites;Other	rp
FAUX	4-Oxoproline@1.702-rp	4-Oxoproline	129.043	1.702	C5H7NO3	366185	Metabolic pathways;Biosynthesis of secondary metabolites;Other	rp
FAUX	129.04353@1.124-rp	#N/A	129.044	1.124	#N/A	#N/A	#N/A	rp
FAUX	2-Azido-2-methylpropanoicacid@1.066-rp	2-Azido-2-methylpropanoicacid	129.053	1.066	C4H7N3O2	10409393	#N/A	rp
FAUX	2-Azido-2-methylpropanoicacid@1.064-rp	2-Azido-2-methylpropanoicacid	129.054	1.064	C4H7N3O2	10409393	#N/A	rp
FAUX	Isoquinoline@10.982-rp	Isoquinoline	129.058	10.982	C9H7N	8098	#N/A	rp
FAUX	Isoquinoline@4.488-rp	Isoquinoline	129.058	4.488	C9H7N	8098	#N/A	rp
FAUX	Isoquinoline@5.923-rp	Isoquinoline	129.058	5.923	C9H7N	8098	#N/A	rp
FAUX	Isoquinoline@7.165-rp	Isoquinoline	129.058	7.165	C9H7N	8098	#N/A	rp
FAUX	Isoquinoline@9.561-rp	Isoquinoline	129.058	9.561	C9H7N	8098	#N/A	rp
FAUX	Isoquinoline@8.397-rp	Isoquinoline	129.058	8.397	C9H7N	8098	#N/A	rp
FAUX	Isoquinoline@8.586-rp	Isoquinoline	129.058	8.586	C9H7N	8098	#N/A	rp
FAUX	Isoquinoline@3.129-rp	Isoquinoline	129.058	3.129	C9H7N	8098	#N/A	rp
FAUX	Isoquinoline@4.713-rp	Isoquinoline	129.058	4.713	C9H7N	8098	#N/A	rp
FAUX	Isoquinoline@9.01-rp	Isoquinoline	129.058	9.01	C9H7N	8098	#N/A	rp
FAUX	Isoquinoline@7.615-rp	Isoquinoline	129.058	7.615	C9H7N	8098	#N/A	rp
FAUX	129.07791@1.204-rp	#N/A	129.078	1.204	#N/A	#N/A	Metabolic pathways;Biosynthesis of secondary metabolites;Biosynthesis of plant secondary metabolites;Other	rp
FAUX	D-Pipecolicacid@1.068-rp	D-Pipecolicacid	129.079	1.068	C6H11NO2	#N/A	Metabolic pathways;Biosynthesis of secondary metabolites;Biosynthesis of plant secondary metabolites;Other	rp
FAUX	D-Pipecolicacid@0.95-rp	D-Pipecolicacid	129.079	0.95	C6H11NO2	#N/A	Metabolic pathways;Biosynthesis of secondary metabolites;Biosynthesis of plant secondary metabolites;Other	rp
FAUX	D-Pipecolicacid@2.15-rp	D-Pipecolicacid	129.079	2.15	C6H11NO2	#N/A	Metabolic pathways;Biosynthesis of secondary metabolites;Biosynthesis of plant secondary metabolites;Other	rp
FAUX	Pipecolicacid@1.211-rp	Pipecolicacid	129.079	1.211	C6H11NO2	826	Metabolic pathways;Biosynthesis of secondary metabolites;Biosynthesis of plant secondary metabolites;Other	rp
FAUX	4-Guanidinobutanal@1.185-rp	4-Guanidinobutanal	129.09	1.185	C5H11N3O	#N/A	Metabolic pathways;Other	rp
FAUX	129.58239@1.041-rp	#N/A	129.582	1.041	#N/A	#N/A	#N/A	rp
FAUX	129.59496@1.043-rp	#N/A	129.595	1.043	#N/A	#N/A	#N/A	rp
FAUX	(E)-Glutaconate@1.096-rp	(E)-Glutaconate	130.027	1.096	C5H6O4	#N/A	Metabolic pathways;Microbial metabolism in diverse environments;2-Oxocarboxylic acid metabolism;Other	rp
FAUX	(E)-Glutaconate@1.433-rp	(E)-Glutaconate	130.027	1.433	C5H6O4	#N/A	Metabolic pathways;Microbial metabolism in diverse environments;2-Oxocarboxylic acid metabolism;Other	rp
FAUX	(E)-Glutaconate@1.199-rp	(E)-Glutaconate	130.027	1.199	C5H6O4	#N/A	Metabolic pathways;Microbial metabolism in diverse environments;2-Oxocarboxylic acid metabolism;Other	rp
FAUX	Ureidoacrylicacid@1.184-rp	Ureidoacrylicacid	130.038	1.184	C4H6N2O3	#N/A	Metabolic pathways;Other	rp
FAUX	N-Nitroimidazolidin-2-imine@6.063-rp	N-Nitroimidazolidin-2-imine	130.049	6.063	C3H6N4O2	362904	#N/A	rp
FAUX	(R)-Pantolactone@1.366-rp	(R)-Pantolactone	130.063	1.366	C6H10O3	#N/A	Metabolic pathways;Biosynthesis of secondary metabolites;Microbial metabolism in diverse environments;Degradation of aromatic compounds;Biosynthesis of amino acids;2-Oxocarboxylic acid metabolism;Other	rp
FAUX	(R)-Pantolactone@3.005-rp	(R)-Pantolactone	130.063	3.005	C6H10O3	#N/A	Metabolic pathways;Biosynthesis of secondary metabolites;Microbial metabolism in diverse environments;Degradation of aromatic compounds;Biosynthesis of amino acids;2-Oxocarboxylic acid metabolism;Other	rp
FAUX	(R)-Pantolactone@3.369-rp	(R)-Pantolactone	130.063	3.369	C6H10O3	#N/A	Metabolic pathways;Biosynthesis of secondary metabolites;Microbial metabolism in diverse environments;Degradation of aromatic compounds;Biosynthesis of amino acids;2-Oxocarboxylic acid metabolism;Other	rp
FAUX	Glutaramide@1.041-rp	Glutaramide	130.074	1.041	C5H10N2O2	200512	#N/A	rp
FAUX	130.07679@13.371-rp	#N/A	130.077	13.371	#N/A	#N/A	#N/A	rp
FAUX	1,2-Divinylbenzene@13.912-rp	1,2-Divinylbenzene	130.078	13.912	C10H10	60033	#N/A	rp
FAUX	1,2-Divinylbenzene@13.386-rp	1,2-Divinylbenzene	130.078	13.386	C10H10	60033	#N/A	rp
FAUX	1,2-Divinylbenzene@8.306-rp	1,2-Divinylbenzene	130.078	8.306	C10H10	60033	#N/A	rp
FAUX	3-butynylbenzene@8.429-rp	3-butynylbenzene	130.078	8.429	C10H10	109960	#N/A	rp
FAUX	1,2-Divinylbenzene@9.138-rp	1,2-Divinylbenzene	130.078	9.138	C10H10	60033	#N/A	rp
FAUX	1,2-Divinylbenzene@8.702-rp	1,2-Divinylbenzene	130.078	8.702	C10H10	60033	#N/A	rp
FAUX	1,2-Divinylbenzene@7.946-rp	1,2-Divinylbenzene	130.078	7.946	C10H10	60033	#N/A	rp
FAUX	Heptanoicacid@8.51-rp	Heptanoicacid	130.1	8.51	C7H14O2	#N/A	#N/A	rp
FAUX	130.56629@1.042-rp	#N/A	130.566	1.042	#N/A	#N/A	#N/A	rp
FAUX	CU5250000@7.622-rp	CU5250000	131.037	7.622	C8H5NO	59433	#N/A	rp
FAUX	CU5250000@4.887-rp	CU5250000	131.037	4.887	C8H5NO	59433	#N/A	rp
FAUX	CU5250000@1.459-rp	CU5250000	131.037	1.459	C8H5NO	59433	#N/A	rp
FAUX	(Trimethylsilyl)acetate@1.541-rp	(Trimethylsilyl)acetate	131.053	1.541	C5H11O2Si	9507277	#N/A	rp
FAUX	(Trimethylsilyl)acetate@2.557-rp	(Trimethylsilyl)acetate	131.053	2.557	C5H11O2Si	9507277	#N/A	rp
FAUX	(S)-4-Amino-5-oxopentanoate@1.053-rp	(S)-4-Amino-5-oxopentanoate	131.058	1.053	C5H9NO3	#N/A	Metabolic pathways;Biosynthesis of secondary metabolites;Microbial metabolism in diverse environments;Biosynthesis of plant secondary metabolites;Biosynthesis of amino acids;ABC transporters;Other	rp
FAUX	(S)-4-Amino-5-oxopentanoate@1.215-rp	(S)-4-Amino-5-oxopentanoate	131.058	1.215	C5H9NO3	#N/A	Metabolic pathways;Biosynthesis of secondary metabolites;Microbial metabolism in diverse environments;Biosynthesis of plant secondary metabolites;Biosynthesis of amino acids;ABC transporters;Other	rp
FAUX	N-Acetylalanine@1.694-rp	N-Acetylalanine	131.058	1.694	C5H9NO3	7068	Metabolic pathways;Biosynthesis of secondary metabolites;Microbial metabolism in diverse environments;Biosynthesis of plant secondary metabolites;Biosynthesis of amino acids;ABC transporters;Other	rp
FAUX	(S)-4-Amino-5-oxopentanoate@1.349-rp	(S)-4-Amino-5-oxopentanoate	131.058	1.349	C5H9NO3	#N/A	Metabolic pathways;Biosynthesis of secondary metabolites;Microbial metabolism in diverse environments;Biosynthesis of plant secondary metabolites;Biosynthesis of amino acids;ABC transporters;Other	rp
FAUX	(S)-4-Amino-5-oxopentanoate@1.518-rp	(S)-4-Amino-5-oxopentanoate	131.059	1.518	C5H9NO3	#N/A	Metabolic pathways;Biosynthesis of secondary metabolites;Microbial metabolism in diverse environments;Biosynthesis of plant secondary metabolites;Biosynthesis of amino acids;ABC transporters;Other	rp
FAUX	(S)-4-Amino-5-oxopentanoate@1.094-rp	(S)-4-Amino-5-oxopentanoate	131.059	1.094	C5H9NO3	#N/A	Metabolic pathways;Biosynthesis of secondary metabolites;Microbial metabolism in diverse environments;Biosynthesis of plant secondary metabolites;Biosynthesis of amino acids;ABC transporters;Other	rp
FAUX	3-Guanidinopropanoate@0.895-rp	3-Guanidinopropanoate	131.07	0.895	C4H9N3O2	#N/A	Metabolic pathways;Other	rp
FAUX	3-Guanidinopropanoate@1.106-rp	3-Guanidinopropanoate	131.07	1.106	C4H9N3O2	#N/A	Metabolic pathways;Other	rp
FAUX	3-Methylindole@6.077-rp	3-Methylindole	131.073	6.077	C9H9N	#N/A	Tryptophan metabolism	rp
FAUX	3-Methylindole@4.689-rp	3-Methylindole	131.073	4.689	C9H9N	#N/A	Tryptophan metabolism	rp
FAUX	3-Methylindole@3.127-rp	3-Methylindole	131.074	3.127	C9H9N	#N/A	Tryptophan metabolism	rp
FAUX	3-Methylindole@7.542-rp	3-Methylindole	131.074	7.542	C9H9N	#N/A	Tryptophan metabolism	rp
FAUX	3-Methylindole@8.406-rp	3-Methylindole	131.074	8.406	C9H9N	#N/A	Tryptophan metabolism	rp
FAUX	3-Methylindole@9.564-rp	3-Methylindole	131.074	9.564	C9H9N	#N/A	Tryptophan metabolism	rp
FAUX	(3R)-beta-Leucine@7.132-rp	(3R)-beta-Leucine	131.095	7.132	C6H13NO2	#N/A	Metabolic pathways;Biosynthesis of secondary metabolites;Microbial metabolism in diverse environments;Biosynthesis of plant secondary metabolites;Biosynthesis of amino acids;2-Oxocarboxylic acid metabolism;ABC transporters;Other	rp
FAUX	(3R)-beta-Leucine@6.267-rp	(3R)-beta-Leucine	131.095	6.267	C6H13NO2	#N/A	Metabolic pathways;Biosynthesis of secondary metabolites;Microbial metabolism in diverse environments;Biosynthesis of plant secondary metabolites;Biosynthesis of amino acids;2-Oxocarboxylic acid metabolism;ABC transporters;Other	rp
FAUX	DL-?-Leucine@5.386-rp	DL-?-Leucine	131.095	5.386	C6H13NO2	#N/A	Metabolic pathways;Biosynthesis of secondary metabolites;Microbial metabolism in diverse environments;Biosynthesis of plant secondary metabolites;Biosynthesis of amino acids;2-Oxocarboxylic acid metabolism;ABC transporters;Other	rp
FAUX	(3R)-beta-Leucine@7.317-rp	(3R)-beta-Leucine	131.095	7.317	C6H13NO2	#N/A	Metabolic pathways;Biosynthesis of secondary metabolites;Microbial metabolism in diverse environments;Biosynthesis of plant secondary metabolites;Biosynthesis of amino acids;2-Oxocarboxylic acid metabolism;ABC transporters;Other	rp
FAUX	DL-?-Leucine@1.196-rp	DL-?-Leucine	131.095	1.196	C6H13NO2	#N/A	Metabolic pathways;Biosynthesis of secondary metabolites;Microbial metabolism in diverse environments;Biosynthesis of plant secondary metabolites;Biosynthesis of amino acids;2-Oxocarboxylic acid metabolism;ABC transporters;Other	rp
FAUX	(3R)-beta-Leucine@2.361-rp	(3R)-beta-Leucine	131.095	2.361	C6H13NO2	#N/A	Metabolic pathways;Biosynthesis of secondary metabolites;Microbial metabolism in diverse environments;Biosynthesis of plant secondary metabolites;Biosynthesis of amino acids;2-Oxocarboxylic acid metabolism;ABC transporters;Other	rp
FAUX	(3R)-beta-Leucine@6.916-rp	(3R)-beta-Leucine	131.095	6.916	C6H13NO2	#N/A	Metabolic pathways;Biosynthesis of secondary metabolites;Microbial metabolism in diverse environments;Biosynthesis of plant secondary metabolites;Biosynthesis of amino acids;2-Oxocarboxylic acid metabolism;ABC transporters;Other	rp
FAUX	Isoleucine@1.353-rp	Isoleucine	131.095	1.353	C6H13NO2	#N/A	Metabolic pathways;Biosynthesis of secondary metabolites;Microbial metabolism in diverse environments;Biosynthesis of plant secondary metabolites;Biosynthesis of amino acids;2-Oxocarboxylic acid metabolism;ABC transporters;Other	rp
FAUX	N-Carbamoylputrescine@1.21-rp	N-Carbamoylputrescine	131.106	1.21	C5H13N3O	#N/A	Metabolic pathways;Other	rp
FAUX	131.52368@7.065-rp	#N/A	131.524	7.065	#N/A	#N/A	#N/A	rp
FAUX	3-Methylsulfolene@4.712-rp	3-Methylsulfolene	132.024	4.712	C5H8O2S	64103	#N/A	rp
FAUX	3-Methylsulfolene@5.084-rp	3-Methylsulfolene	132.025	5.084	C5H8O2S	64103	#N/A	rp
FAUX	3-Methylsulfolene@2.755-rp	3-Methylsulfolene	132.025	2.755	C5H8O2S	64103	#N/A	rp
FAUX	3-Methylsulfolene@1.255-rp	3-Methylsulfolene	132.025	1.255	C5H8O2S	64103	#N/A	rp
FAUX	(S)-2-Acetolactate@1.755-rp	(S)-2-Acetolactate	132.042	1.755	C5H8O4	#N/A	Metabolic pathways;Biosynthesis of secondary metabolites;Microbial metabolism in diverse environments;Degradation of aromatic compounds;Biosynthesis of amino acids;2-Oxocarboxylic acid metabolism;Phenylalanine metabolism;Other	rp
FAUX	(S)-2-Acetolactate@1.161-rp	(S)-2-Acetolactate	132.042	1.161	C5H8O4	#N/A	Metabolic pathways;Biosynthesis of secondary metabolites;Microbial metabolism in diverse environments;Degradation of aromatic compounds;Biosynthesis of amino acids;2-Oxocarboxylic acid metabolism;Phenylalanine metabolism;Other	rp
FAUX	Glutaricacid@2.246-rp	Glutaricacid	132.042	2.246	C5H8O4	723	Metabolic pathways;Biosynthesis of secondary metabolites;Microbial metabolism in diverse environments;Degradation of aromatic compounds;Biosynthesis of amino acids;2-Oxocarboxylic acid metabolism;Phenylalanine metabolism;Other	rp
FAUX	Pteridine@1.474-rp	Pteridine	132.043	1.474	C6H4N4	1014	Metabolic pathways;Biosynthesis of secondary metabolites;Microbial metabolism in diverse environments;Degradation of aromatic compounds;Biosynthesis of amino acids;2-Oxocarboxylic acid metabolism;Phenylalanine metabolism;Other	rp
FAUX	Pteridine@1.169-rp	Pteridine	132.043	1.169	C6H4N4	1014	#N/A	rp
FAUX	132.04503@7.621-rp	#N/A	132.045	7.621	C4H9N2OP	#N/A	#N/A	rp
FAUX	132.05198@1.45-rp	#N/A	132.052	1.45	#N/A	#N/A	#N/A	rp
FAUX	D-Asparagine@1.226-rp	D-Asparagine	132.054	1.226	C4H8N2O3	388679	Metabolic pathways;Biosynthesis of secondary metabolites;Biosynthesis of plant secondary metabolites;Biosynthesis of amino acids;Other	rp
FAUX	D-Asparagine@1.437-rp	D-Asparagine	132.054	1.437	C4H8N2O3	388679	Metabolic pathways;Biosynthesis of secondary metabolites;Biosynthesis of plant secondary metabolites;Biosynthesis of amino acids;Other	rp
FAUX	D-Asparagine@1.049-rp	D-Asparagine	132.054	1.049	C4H8N2O3	388679	Metabolic pathways;Biosynthesis of secondary metabolites;Biosynthesis of plant secondary metabolites;Biosynthesis of amino acids;Other	rp
FAUX	132.05486@1.043-rp	#N/A	132.055	1.043	#N/A	#N/A	#N/A	rp
FAUX	2-indanone@12.704-rp	2-indanone	132.057	12.704	C9H8O	#N/A	Metabolic pathways;Biosynthesis of secondary metabolites;Microbial metabolism in diverse environments;Biosynthesis of plant secondary metabolites;Phenylpropanoid biosynthesis;Other	rp
FAUX	2-indanone@12.435-rp	2-indanone	132.057	12.435	C9H8O	#N/A	Metabolic pathways;Biosynthesis of secondary metabolites;Microbial metabolism in diverse environments;Biosynthesis of plant secondary metabolites;Phenylpropanoid biosynthesis;Other	rp
FAUX	2-indanone@9.948-rp	2-indanone	132.057	9.948	C9H8O	#N/A	Metabolic pathways;Biosynthesis of secondary metabolites;Microbial metabolism in diverse environments;Biosynthesis of plant secondary metabolites;Phenylpropanoid biosynthesis;Other	rp
FAUX	132.07374@1.689-rp	#N/A	132.074	1.689	#N/A	#N/A	#N/A	rp
FAUX	2-hydroxycaproicacid@9.312-rp	2-hydroxycaproicacid	132.079	9.312	C6H12O3	#N/A	Microbial metabolism in diverse environments;Degradation of aromatic compounds;Other	rp
FAUX	2-hydroxycaproicacid@9.519-rp	2-hydroxycaproicacid	132.079	9.519	C6H12O3	#N/A	Microbial metabolism in diverse environments;Degradation of aromatic compounds;Other	rp
FAUX	2-hydroxycaproicacid@3.606-rp	2-hydroxycaproicacid	132.079	3.606	C6H12O3	#N/A	Microbial metabolism in diverse environments;Degradation of aromatic compounds;Other	rp
FAUX	2-Hydroxycaproicacid@5.038-rp	2-Hydroxycaproicacid	132.079	5.038	C6H12O3	#N/A	Microbial metabolism in diverse environments;Degradation of aromatic compounds;Other	rp
FAUX	2-Hydroxycaproicacid@5.265-rp	2-Hydroxycaproicacid	132.079	5.265	C6H12O3	#N/A	Microbial metabolism in diverse environments;Degradation of aromatic compounds;Other	rp
FAUX	2-Hydroxycaproicacid@5.745-rp	2-Hydroxycaproicacid	132.079	5.745	C6H12O3	#N/A	Microbial metabolism in diverse environments;Degradation of aromatic compounds;Other	rp
FAUX	2-Hydroxycaproicacid@4.059-rp	2-Hydroxycaproicacid	132.079	4.059	C6H12O3	#N/A	Microbial metabolism in diverse environments;Degradation of aromatic compounds;Other	rp
FAUX	MFCD03427188@9.546-rp	MFCD03427188	132.08	9.546	C5H16Si2	120402	#N/A	rp
FAUX	(2R-4S)-2-4-Diaminopentanoate@0.94-rp	(2R-4S)-2-4-Diaminopentanoate	132.09	0.94	C5H12N2O2	#N/A	Metabolic pathways;Biosynthesis of secondary metabolites;Biosynthesis of plant secondary metabolites;Biosynthesis of amino acids;2-Oxocarboxylic acid metabolism;ABC transporters;Other	rp
FAUX	(2R-4S)-2-4-Diaminopentanoate@1.068-rp	(2R-4S)-2-4-Diaminopentanoate	132.09	1.068	C5H12N2O2	#N/A	Metabolic pathways;Biosynthesis of secondary metabolites;Biosynthesis of plant secondary metabolites;Biosynthesis of amino acids;2-Oxocarboxylic acid metabolism;ABC transporters;Other	rp
FAUX	(2R-4S)-2-4-Diaminopentanoate@1.86-rp	(2R-4S)-2-4-Diaminopentanoate	132.09	1.86	C5H12N2O2	#N/A	Metabolic pathways;Biosynthesis of secondary metabolites;Biosynthesis of plant secondary metabolites;Biosynthesis of amino acids;2-Oxocarboxylic acid metabolism;ABC transporters;Other	rp
FAUX	MFCD00075212@1.037-rp	MFCD00075212	132.091	1.037	C6H13[15]NO2	8504788	#N/A	rp
FAUX	1,2,3,4-tetrahydronaphthalene@13.392-rp	1,2,3,4-tetrahydronaphthalene	132.094	13.392	C10H12	#N/A	Microbial metabolism in diverse environments;Other	rp
FAUX	1,2,3,4-tetrahydronaphthalene@8.773-rp	1,2,3,4-tetrahydronaphthalene	132.094	8.773	C10H12	#N/A	Microbial metabolism in diverse environments;Other	rp
FAUX	1,2,3,4-tetrahydronaphthalene@7.632-rp	1,2,3,4-tetrahydronaphthalene	132.094	7.632	C10H12	#N/A	Microbial metabolism in diverse environments;Other	rp
FAUX	1,2,3,4-tetrahydronaphthalene@17.782-rp	1,2,3,4-tetrahydronaphthalene	132.094	17.782	C10H12	#N/A	Microbial metabolism in diverse environments;Other	rp
FAUX	1,2,3,4-tetrahydronaphthalene@7.934-rp	1,2,3,4-tetrahydronaphthalene	132.094	7.934	C10H12	#N/A	Microbial metabolism in diverse environments;Other	rp
FAUX	1,2,3,4-tetrahydronaphthalene@15.065-rp	1,2,3,4-tetrahydronaphthalene	132.094	15.065	C10H12	#N/A	Microbial metabolism in diverse environments;Other	rp
FAUX	1,2,3,4-tetrahydronaphthalene@16.257-rp	1,2,3,4-tetrahydronaphthalene	132.094	16.257	C10H12	#N/A	Microbial metabolism in diverse environments;Other	rp
FAUX	L-Asparticacid@1.051-rp	L-Asparticacid	133.038	1.051	C4H7NO4	#N/A	Metabolic pathways;Biosynthesis of secondary metabolites;Microbial metabolism in diverse environments;Biosynthesis of plant secondary metabolites;Biosynthesis of amino acids;2-Oxocarboxylic acid metabolism;ABC transporters;Biosynthesis of plant hormones;Other	rp
FAUX	133.05132@1.47-rp	#N/A	133.051	1.47	C2H8N5P	#N/A	#N/A	rp
FAUX	133.05139@2.133-rp	#N/A	133.051	2.133	C2H8N5P	#N/A	#N/A	rp
FAUX	133.05194@7.907-rp	#N/A	133.052	7.907	#N/A	#N/A	Metabolic pathways;Biosynthesis of secondary metabolites;Tryptophan metabolism;Other	rp
FAUX	4-Hydroxyindole@6.585-rp	4-Hydroxyindole	133.053	6.585	C8H7NO	#N/A	Metabolic pathways;Biosynthesis of secondary metabolites;Tryptophan metabolism;Other	rp
FAUX	2-Oxindole@7.921-rp	2-Oxindole	133.053	7.921	C8H7NO	#N/A	Metabolic pathways;Biosynthesis of secondary metabolites;Tryptophan metabolism;Other	rp
FAUX	2-Oxindole@4.712-rp	2-Oxindole	133.053	4.712	C8H7NO	#N/A	Metabolic pathways;Biosynthesis of secondary metabolites;Tryptophan metabolism;Other	rp
FAUX	2-Oxindole@2.14-rp	2-Oxindole	133.053	2.14	C8H7NO	#N/A	Metabolic pathways;Biosynthesis of secondary metabolites;Tryptophan metabolism;Other	rp
FAUX	2-Oxindole@6.95-rp	2-Oxindole	133.053	6.95	C8H7NO	#N/A	Metabolic pathways;Biosynthesis of secondary metabolites;Tryptophan metabolism;Other	rp
FAUX	2-Oxindole@1.462-rp	2-Oxindole	133.053	1.462	C8H7NO	#N/A	Metabolic pathways;Biosynthesis of secondary metabolites;Tryptophan metabolism;Other	rp
FAUX	2-Oxindole@7.618-rp	2-Oxindole	133.053	7.618	C8H7NO	#N/A	Metabolic pathways;Biosynthesis of secondary metabolites;Tryptophan metabolism;Other	rp
FAUX	2-Oxindole@7.359-rp	2-Oxindole	133.053	7.359	C8H7NO	#N/A	Metabolic pathways;Biosynthesis of secondary metabolites;Tryptophan metabolism;Other	rp
FAUX	133.07306@1.064-rp	#N/A	133.073	1.064	#N/A	#N/A	Metabolic pathways;Biosynthesis of secondary metabolites;Other	rp
FAUX	N-hydroxyvaline@1.042-rp	N-hydroxyvaline	133.074	1.042	C5H11NO3	#N/A	Metabolic pathways;Biosynthesis of secondary metabolites;Other	rp
FAUX	N-hydroxyvaline@1.484-rp	N-hydroxyvaline	133.074	1.484	C5H11NO3	#N/A	Metabolic pathways;Biosynthesis of secondary metabolites;Other	rp
FAUX	133.07518@1.473-rp	#N/A	133.075	1.473	#N/A	#N/A	#N/A	rp
FAUX	2-Phenylcyclopropanamine@5.021-rp	2-Phenylcyclopropanamine	133.089	5.021	C9H11N	5329	#N/A	rp
FAUX	Diethoxyethylamine@1.042-rp	Diethoxyethylamine	133.11	1.042	C6H15NO2	13857397	#N/A	rp
FAUX	133.5974@4.913-rp	#N/A	133.597	4.913	#N/A	#N/A	#N/A	rp
FAUX	133.95398@1.004-rp	#N/A	133.954	1.004	#N/A	#N/A	#N/A	rp
FAUX	DL-Malicacid@1.204-rp	DL-Malicacid	134.022	1.204	C4H6O5	#N/A	Metabolic pathways;Biosynthesis of secondary metabolites;Microbial metabolism in diverse environments;Biosynthesis of plant secondary metabolites;Biosynthesis of phenylpropanoids;Biosynthesis of alkaloids derived from shikimate pathway;Biosynthesis of plant hormones;Other	rp
FAUX	Guanine@3.993-rp	Guanine	134.023	3.993	C5H5N5O	744	#N/A	rp
FAUX	Guanine@2.67-rp	Guanine	134.023	2.67	C5H5N5O	744	#N/A	rp
FAUX	Guanine@1.995-rp	Guanine	134.023	1.995	C5H5N5O	744	#N/A	rp
FAUX	Phenylglyoxal@6.286-rp	Phenylglyoxal	134.037	6.286	C8H6O2	13470	#N/A	rp
FAUX	Phenylglyoxal@9.3-rp	Phenylglyoxal	134.037	9.3	C8H6O2	13470	#N/A	rp
FAUX	Ferulicacid@8.155-rp	Ferulicacid	134.037	8.155	C10H10O4	689	#N/A	rp
FAUX	Caffeicacid@7.575-rp	Caffeicacid	134.037	7.575	C9H8O4	2423	#N/A	rp
FAUX	(R)-2-3-Dihydroxy-3-methylbutanoate@1.389-rp	(R)-2-3-Dihydroxy-3-methylbutanoate	134.058	1.389	C5H10O4	#N/A	Metabolic pathways;Biosynthesis of secondary metabolites;Biosynthesis of amino acids;2-Oxocarboxylic acid metabolism;Other	rp
FAUX	(R)-2-3-Dihydroxy-3-methylbutanoate@1.115-rp	(R)-2-3-Dihydroxy-3-methylbutanoate	134.058	1.115	C5H10O4	#N/A	Metabolic pathways;Biosynthesis of secondary metabolites;Biosynthesis of amino acids;2-Oxocarboxylic acid metabolism;Other	rp
FAUX	Dihydropteridine@1.447-rp	Dihydropteridine	134.059	1.447	C6H6N4	#N/A	#N/A	rp
FAUX	Dihydropteridine@1.224-rp	Dihydropteridine	134.059	1.224	C6H6N4	#N/A	#N/A	rp
FAUX	134.06066@2.051-rp	#N/A	134.061	2.051	C4H11N2OP	#N/A	#N/A	rp
FAUX	134.06072@1.505-rp	#N/A	134.061	1.505	C4H11N2OP	#N/A	#N/A	rp
FAUX	chavicol@9.887-rp	chavicol	134.073	9.887	C9H10O	21105856	Biosynthesis of secondary metabolites;Biosynthesis of plant secondary metabolites;Phenylpropanoid biosynthesis	rp
FAUX	chavicol@7.601-rp	chavicol	134.073	7.601	C9H10O	21105856	Biosynthesis of secondary metabolites;Biosynthesis of plant secondary metabolites;Phenylpropanoid biosynthesis	rp
FAUX	tetrahydroquinoxaline@1.473-rp	tetrahydroquinoxaline	134.084	1.473	C8H10N2	69474	#N/A	rp
FAUX	p-cymene@13.378-rp	p-cymene	134.109	13.378	C10H14	7183	Metabolic pathways;Microbial metabolism in diverse environments;Degradation of aromatic compounds;Other	rp
FAUX	p-cymene@10.485-rp	p-cymene	134.109	10.485	C10H14	7183	Metabolic pathways;Microbial metabolism in diverse environments;Degradation of aromatic compounds;Other	rp
FAUX	p-cymene@11.286-rp	p-cymene	134.109	11.286	C10H14	7183	Metabolic pathways;Microbial metabolism in diverse environments;Degradation of aromatic compounds;Other	rp
FAUX	p-cymene@16.259-rp	p-cymene	134.109	16.259	C10H14	7183	Metabolic pathways;Microbial metabolism in diverse environments;Degradation of aromatic compounds;Other	rp
FAUX	p-cymene@8.422-rp	p-cymene	134.11	8.422	C10H14	7183	Metabolic pathways;Microbial metabolism in diverse environments;Degradation of aromatic compounds;Other	rp
FAUX	p-cymene@15.059-rp	p-cymene	134.11	15.059	C10H14	7183	Metabolic pathways;Microbial metabolism in diverse environments;Degradation of aromatic compounds;Other	rp
FAUX	p-cymene@17.782-rp	p-cymene	134.11	17.782	C10H14	7183	Metabolic pathways;Microbial metabolism in diverse environments;Degradation of aromatic compounds;Other	rp
FAUX	134.56883@1.055-rp	#N/A	134.569	1.055	#N/A	#N/A	#N/A	rp
FAUX	135.00677@3.306-rp	#N/A	135.007	3.306	C5HN3O2	#N/A	#N/A	rp
FAUX	135.00691@2.441-rp	#N/A	135.007	2.441	C5HN3O2	#N/A	#N/A	rp
FAUX	Benzoxazolone@4.448-rp	Benzoxazolone	135.032	4.448	C7H5NO2	5820	#N/A	rp
FAUX	Benzoxazolone@6.229-rp	Benzoxazolone	135.032	6.229	C7H5NO2	5820	#N/A	rp
FAUX	135.04476@8.149-rp	#N/A	135.045	8.149	C4H10NO2P	#N/A	#N/A	rp
FAUX	NSC88613@1.041-rp	NSC88613	135.048	1.041	C8H6FN	61178	#N/A	rp
FAUX	Adenine@3.427-rp	Adenine	135.055	3.427	C5H5N5	185	Metabolic pathways;Other	rp
FAUX	Adenine@1.761-rp	Adenine	135.055	1.761	C5H5N5	185	Metabolic pathways;Other	rp
FAUX	Adenine@5.708-rp	Adenine	135.055	5.708	C5H5N5	185	Metabolic pathways;Other	rp
FAUX	Adenine@1.428-rp	Adenine	135.055	1.428	C5H5N5	185	Metabolic pathways;Other	rp
FAUX	Adenine@2.195-rp_1015	Adenine	135.055	2.195	C5H5N5	185	Metabolic pathways;Other	rp
FAUX	Adenine@4.354-rp	Adenine	135.055	4.354	C5H5N5	185	Metabolic pathways;Other	rp
FAUX	Adenine@7.394-rp	Adenine	135.055	7.394	C5H5N5	185	Metabolic pathways;Other	rp
FAUX	135.05622@1.468-rp	#N/A	135.056	1.468	C3H10N3OP	#N/A	#N/A	rp
FAUX	2-Aminoacetophenone;O-Acetylaniline@6.583-rp	2-Aminoacetophenone;O-Acetylaniline	135.069	6.583	C8H9NO	#N/A	Metabolic pathways;Biosynthesis of secondary metabolites;Microbial metabolism in diverse environments;2-Oxocarboxylic acid metabolism;Phenylalanine metabolism;Other	rp
FAUX	2-Aminoacetophenone;O-Acetylaniline@9.383-rp	2-Aminoacetophenone;O-Acetylaniline	135.069	9.383	C8H9NO	#N/A	Metabolic pathways;Biosynthesis of secondary metabolites;Microbial metabolism in diverse environments;2-Oxocarboxylic acid metabolism;Phenylalanine metabolism;Other	rp
FAUX	2-Aminoacetophenone;O-Acetylaniline@6.368-rp	2-Aminoacetophenone;O-Acetylaniline	135.069	6.368	C8H9NO	#N/A	Metabolic pathways;Biosynthesis of secondary metabolites;Microbial metabolism in diverse environments;2-Oxocarboxylic acid metabolism;Phenylalanine metabolism;Other	rp
FAUX	2-Aminoacetophenone;O-Acetylaniline@8.751-rp	2-Aminoacetophenone;O-Acetylaniline	135.069	8.751	C8H9NO	#N/A	Metabolic pathways;Biosynthesis of secondary metabolites;Microbial metabolism in diverse environments;2-Oxocarboxylic acid metabolism;Phenylalanine metabolism;Other	rp
FAUX	2-Aminoacetophenone;O-Acetylaniline@6.038-rp	2-Aminoacetophenone;O-Acetylaniline	135.069	6.038	C8H9NO	#N/A	Metabolic pathways;Biosynthesis of secondary metabolites;Microbial metabolism in diverse environments;2-Oxocarboxylic acid metabolism;Phenylalanine metabolism;Other	rp
FAUX	L-Tyrosine@1.499-rp	L-Tyrosine	135.069	1.499	C9H11NO3	#N/A	Metabolic pathways;Biosynthesis of secondary metabolites;Microbial metabolism in diverse environments;2-Oxocarboxylic acid metabolism;Phenylalanine metabolism;Other	rp
FAUX	2-Aminoacetophenone;O-Acetylaniline@4.683-rp	2-Aminoacetophenone;O-Acetylaniline	135.069	4.683	C8H9NO	#N/A	Metabolic pathways;Biosynthesis of secondary metabolites;Microbial metabolism in diverse environments;2-Oxocarboxylic acid metabolism;Phenylalanine metabolism;Other	rp
FAUX	2-Aminoacetophenone;O-Acetylaniline@3.206-rp	2-Aminoacetophenone;O-Acetylaniline	135.069	3.206	C8H9NO	#N/A	Metabolic pathways;Biosynthesis of secondary metabolites;Microbial metabolism in diverse environments;2-Oxocarboxylic acid metabolism;Phenylalanine metabolism;Other	rp
FAUX	2-Aminoacetophenone;O-Acetylaniline@2.316-rp	2-Aminoacetophenone;O-Acetylaniline	135.069	2.316	C8H9NO	#N/A	Metabolic pathways;Biosynthesis of secondary metabolites;Microbial metabolism in diverse environments;2-Oxocarboxylic acid metabolism;Phenylalanine metabolism;Other	rp
FAUX	2-(Aminomethyl)-2-(hydroxymethyl)-1,3-propanediol@1.028-rp	2-(Aminomethyl)-2-(hydroxymethyl)-1,3-propanediol	135.09	1.028	C5H13NO3	9530432	#N/A	rp
FAUX	135.59486@1.316-rp	#N/A	135.595	1.316	#N/A	#N/A	#N/A	rp
FAUX	135.59601@1.326-rp	#N/A	135.596	1.326	#N/A	#N/A	#N/A	rp
FAUX	135.93307@0.99-rp	#N/A	135.933	0.99	#N/A	#N/A	#N/A	rp
FAUX	2-(Dioxido-lambda-6--sulfanylidene)propanoicacid@1.43-rp	2-(Dioxido-lambda-6--sulfanylidene)propanoicacid	135.983	1.43	C3H4O4S	#N/A	#N/A	rp
FAUX	136.02246@0.898-rp	#N/A	136.022	0.898	C3H9N2PS	#N/A	#N/A	rp
FAUX	Gluconicacid@1.067-rp	Gluconicacid	136.037	1.067	C6H12O7	#N/A	Metabolic pathways;Other	rp
FAUX	Hypoxanthine@2.483-rp	Hypoxanthine	136.039	2.483	C5H4N4O	#N/A	Metabolic pathways;Other	rp
FAUX	Hypoxanthine@3.576-rp	Hypoxanthine	136.039	3.576	C5H4N4O	#N/A	Metabolic pathways;Other	rp
FAUX	allopurinol@4.355-rp	allopurinol	136.039	4.355	C5H4N4O	#N/A	Metabolic pathways;Other	rp
FAUX	allopurinol@4.823-rp	allopurinol	136.039	4.823	C5H4N4O	#N/A	Metabolic pathways;Other	rp
FAUX	Hypoxanthine@2.374-rp	Hypoxanthine	136.039	2.374	C5H4N4O	#N/A	Metabolic pathways;Other	rp
FAUX	141551@1.482-rp	141551	136.05	1.482	C4H4N6	63911	#N/A	rp
FAUX	3'-hydroxyacetophenone;3-ACETYLPHENOL@1.49-rp	3'-hydroxyacetophenone;3-ACETYLPHENOL	136.052	1.49	C8H8O2	#N/A	Metabolic pathways;Biosynthesis of secondary metabolites;Microbial metabolism in diverse environments;Degradation of aromatic compounds;Biosynthesis of plant secondary metabolites;Phenylpropanoid biosynthesis;Biosynthesis of alkaloids derived from shikimate pathway;Tyrosine metabolism;Phenylalanine metabolism;Other	rp
FAUX	3'-hydroxyacetophenone;3-ACETYLPHENOL@8.166-rp	3'-hydroxyacetophenone;3-ACETYLPHENOL	136.052	8.166	C8H8O2	#N/A	Metabolic pathways;Biosynthesis of secondary metabolites;Microbial metabolism in diverse environments;Degradation of aromatic compounds;Biosynthesis of plant secondary metabolites;Phenylpropanoid biosynthesis;Biosynthesis of alkaloids derived from shikimate pathway;Tyrosine metabolism;Phenylalanine metabolism;Other	rp
FAUX	2-Methylbenzoicacid@9.007-rp	2-Methylbenzoicacid	136.052	9.007	C8H8O2	#N/A	Metabolic pathways;Biosynthesis of secondary metabolites;Microbial metabolism in diverse environments;Degradation of aromatic compounds;Biosynthesis of plant secondary metabolites;Phenylpropanoid biosynthesis;Biosynthesis of alkaloids derived from shikimate pathway;Tyrosine metabolism;Phenylalanine metabolism;Other	rp
FAUX	3'-hydroxyacetophenone;3-ACETYLPHENOL@6.899-rp	3'-hydroxyacetophenone;3-ACETYLPHENOL	136.053	6.899	C8H8O2	#N/A	Metabolic pathways;Biosynthesis of secondary metabolites;Microbial metabolism in diverse environments;Degradation of aromatic compounds;Biosynthesis of plant secondary metabolites;Phenylpropanoid biosynthesis;Biosynthesis of alkaloids derived from shikimate pathway;Tyrosine metabolism;Phenylalanine metabolism;Other	rp
FAUX	3'-hydroxyacetophenone;3-ACETYLPHENOL@2.15-rp	3'-hydroxyacetophenone;3-ACETYLPHENOL	136.053	2.15	C8H8O2	#N/A	Metabolic pathways;Biosynthesis of secondary metabolites;Microbial metabolism in diverse environments;Degradation of aromatic compounds;Biosynthesis of plant secondary metabolites;Phenylpropanoid biosynthesis;Biosynthesis of alkaloids derived from shikimate pathway;Tyrosine metabolism;Phenylalanine metabolism;Other	rp
FAUX	3'-hydroxyacetophenone;3-ACETYLPHENOL@1.784-rp	3'-hydroxyacetophenone;3-ACETYLPHENOL	136.053	1.784	C8H8O2	#N/A	Metabolic pathways;Biosynthesis of secondary metabolites;Microbial metabolism in diverse environments;Degradation of aromatic compounds;Biosynthesis of plant secondary metabolites;Phenylpropanoid biosynthesis;Biosynthesis of alkaloids derived from shikimate pathway;Tyrosine metabolism;Phenylalanine metabolism;Other	rp
FAUX	3'-hydroxyacetophenone;3-ACETYLPHENOL@7.834-rp	3'-hydroxyacetophenone;3-ACETYLPHENOL	136.053	7.834	C8H8O2	#N/A	Metabolic pathways;Biosynthesis of secondary metabolites;Microbial metabolism in diverse environments;Degradation of aromatic compounds;Biosynthesis of plant secondary metabolites;Phenylpropanoid biosynthesis;Biosynthesis of alkaloids derived from shikimate pathway;Tyrosine metabolism;Phenylalanine metabolism;Other	rp
FAUX	3'-hydroxyacetophenone;3-ACETYLPHENOL@2.435-rp	3'-hydroxyacetophenone;3-ACETYLPHENOL	136.053	2.435	C8H8O2	#N/A	Metabolic pathways;Biosynthesis of secondary metabolites;Microbial metabolism in diverse environments;Degradation of aromatic compounds;Biosynthesis of plant secondary metabolites;Phenylpropanoid biosynthesis;Biosynthesis of alkaloids derived from shikimate pathway;Tyrosine metabolism;Phenylalanine metabolism;Other	rp
FAUX	2-Methylbenzoicacid@8.215-rp	2-Methylbenzoicacid	136.053	8.215	C8H8O2	#N/A	Metabolic pathways;Biosynthesis of secondary metabolites;Microbial metabolism in diverse environments;Degradation of aromatic compounds;Biosynthesis of plant secondary metabolites;Phenylpropanoid biosynthesis;Biosynthesis of alkaloids derived from shikimate pathway;Tyrosine metabolism;Phenylalanine metabolism;Other	rp
FAUX	2-Methylbenzoicacid@6.281-rp	2-Methylbenzoicacid	136.053	6.281	C8H8O2	#N/A	Metabolic pathways;Biosynthesis of secondary metabolites;Microbial metabolism in diverse environments;Degradation of aromatic compounds;Biosynthesis of plant secondary metabolites;Phenylpropanoid biosynthesis;Biosynthesis of alkaloids derived from shikimate pathway;Tyrosine metabolism;Phenylalanine metabolism;Other	rp
FAUX	3'-hydroxyacetophenone;3-ACETYLPHENOL@8.428-rp	3'-hydroxyacetophenone;3-ACETYLPHENOL	136.053	8.428	C8H8O2	#N/A	Metabolic pathways;Biosynthesis of secondary metabolites;Microbial metabolism in diverse environments;Degradation of aromatic compounds;Biosynthesis of plant secondary metabolites;Phenylpropanoid biosynthesis;Biosynthesis of alkaloids derived from shikimate pathway;Tyrosine metabolism;Phenylalanine metabolism;Other	rp
FAUX	3'-hydroxyacetophenone;3-ACETYLPHENOL@1.245-rp	3'-hydroxyacetophenone;3-ACETYLPHENOL	136.053	1.245	C8H8O2	#N/A	Metabolic pathways;Biosynthesis of secondary metabolites;Microbial metabolism in diverse environments;Degradation of aromatic compounds;Biosynthesis of plant secondary metabolites;Phenylpropanoid biosynthesis;Biosynthesis of alkaloids derived from shikimate pathway;Tyrosine metabolism;Phenylalanine metabolism;Other	rp
FAUX	3'-hydroxyacetophenone;3-ACETYLPHENOL@12.43-rp	3'-hydroxyacetophenone;3-ACETYLPHENOL	136.053	12.43	C8H8O2	#N/A	Metabolic pathways;Biosynthesis of secondary metabolites;Microbial metabolism in diverse environments;Degradation of aromatic compounds;Biosynthesis of plant secondary metabolites;Phenylpropanoid biosynthesis;Biosynthesis of alkaloids derived from shikimate pathway;Tyrosine metabolism;Phenylalanine metabolism;Other	rp
FAUX	3'-hydroxyacetophenone;3-ACETYLPHENOL@1.504-rp	3'-hydroxyacetophenone;3-ACETYLPHENOL	136.053	1.504	C8H8O2	#N/A	Metabolic pathways;Biosynthesis of secondary metabolites;Microbial metabolism in diverse environments;Degradation of aromatic compounds;Biosynthesis of plant secondary metabolites;Phenylpropanoid biosynthesis;Biosynthesis of alkaloids derived from shikimate pathway;Tyrosine metabolism;Phenylalanine metabolism;Other	rp
FAUX	2-Methylbenzoicacid@8.548-rp	2-Methylbenzoicacid	136.053	8.548	C8H8O2	#N/A	Metabolic pathways;Biosynthesis of secondary metabolites;Microbial metabolism in diverse environments;Degradation of aromatic compounds;Biosynthesis of plant secondary metabolites;Phenylpropanoid biosynthesis;Biosynthesis of alkaloids derived from shikimate pathway;Tyrosine metabolism;Phenylalanine metabolism;Other	rp
FAUX	3'-hydroxyacetophenone;3-ACETYLPHENOL@7.582-rp	3'-hydroxyacetophenone;3-ACETYLPHENOL	136.053	7.582	C8H8O2	#N/A	Metabolic pathways;Biosynthesis of secondary metabolites;Microbial metabolism in diverse environments;Degradation of aromatic compounds;Biosynthesis of plant secondary metabolites;Phenylpropanoid biosynthesis;Biosynthesis of alkaloids derived from shikimate pathway;Tyrosine metabolism;Phenylalanine metabolism;Other	rp
FAUX	DL-4-Hydroxyphenyllacticacid@4.402-rp	DL-4-Hydroxyphenyllacticacid	136.053	4.402	C9H10O4	#N/A	Metabolic pathways;Biosynthesis of secondary metabolites;Microbial metabolism in diverse environments;Degradation of aromatic compounds;Biosynthesis of plant secondary metabolites;Phenylpropanoid biosynthesis;Biosynthesis of alkaloids derived from shikimate pathway;Tyrosine metabolism;Phenylalanine metabolism;Other	rp
FAUX	(2--13-C)-7H-Purin-6-amine@4.71-rp	(2--13-C)-7H-Purin-6-amine	136.058	4.71	C4[13]CH5N5	#N/A	#N/A	rp
FAUX	136.06228@1.081-rp	#N/A	136.062	1.081	#N/A	#N/A	#N/A	rp
FAUX	6-Methylnicotinamide@1.063-rp	6-Methylnicotinamide	136.064	1.063	C7H8N2O	86975	#N/A	rp
FAUX	D-Apiitol@1.156-rp	D-Apiitol	136.074	1.156	C5H12O4	#N/A	#N/A	rp
FAUX	4329@9.862-rp	4329	136.089	9.862	C9H12O	10248	#N/A	rp
FAUX	4329@8.798-rp	4329	136.089	8.798	C9H12O	10248	#N/A	rp
FAUX	4329@10.023-rp	4329	136.089	10.023	C9H12O	10248	#N/A	rp
FAUX	136.59009@1.057-rp	#N/A	136.59	1.057	#N/A	#N/A	#N/A	rp
FAUX	136.60277@1.047-rp	#N/A	136.603	1.047	#N/A	#N/A	#N/A	rp
FAUX	136.99113@1.425-rp	#N/A	136.991	1.425	#N/A	#N/A	#N/A	rp
FAUX	137.00016@1.592-rp	#N/A	137	1.592	#N/A	#N/A	#N/A	rp
FAUX	137.01124@4.353-rp	#N/A	137.011	4.353	C6H3NO3	#N/A	#N/A	rp
FAUX	137.01135@5.275-rp	#N/A	137.011	5.275	C6H3NO3	#N/A	#N/A	rp
FAUX	1-aminocyclopropylphosphonicacid@8.516-rp	1-aminocyclopropylphosphonicacid	137.024	8.516	C3H8NO3P	168967	#N/A	rp
FAUX	1-aminocyclopropylphosphonicacid@5.35-rp	1-aminocyclopropylphosphonicacid	137.024	5.35	C3H8NO3P	168967	#N/A	rp
FAUX	3-Carboxy-1-methylpyridinium;N-Methylnicotinicacid@8.031-rp	3-Carboxy-1-methylpyridinium;N-Methylnicotinicacid	137.048	8.031	C7H7NO2	#N/A	Metabolic pathways;Biosynthesis of secondary metabolites;Microbial metabolism in diverse environments;Degradation of aromatic compounds;Biosynthesis of plant secondary metabolites;Biosynthesis of phenylpropanoids;Biosynthesis of amino acids;Biosynthesis of alkaloids derived from shikimate pathway;Tryptophan metabolism;Biosynthesis of various secondary metabolites - part 2;Aminobenzoate degradatio…	rp
FAUX	4-Aminobenzoicacid@4.783-rp	4-Aminobenzoicacid	137.048	4.783	C7H7NO2	953	Metabolic pathways;Biosynthesis of secondary metabolites;Microbial metabolism in diverse environments;Degradation of aromatic compounds;Biosynthesis of plant secondary metabolites;Biosynthesis of phenylpropanoids;Biosynthesis of amino acids;Biosynthesis of alkaloids derived from shikimate pathway;Tryptophan metabolism;Biosynthesis of various secondary metabolites - part 2;Aminobenzoate degradatio…	rp
FAUX	Trigonelline@1.462-rp	Trigonelline	137.048	1.462	C7H7NO2	5369	Metabolic pathways;Biosynthesis of secondary metabolites;Microbial metabolism in diverse environments;Degradation of aromatic compounds;Biosynthesis of plant secondary metabolites;Biosynthesis of phenylpropanoids;Biosynthesis of amino acids;Biosynthesis of alkaloids derived from shikimate pathway;Tryptophan metabolism;Biosynthesis of various secondary metabolites - part 2;Aminobenzoate degradatio…	rp
FAUX	Trigonelline@1.305-rp	Trigonelline	137.048	1.305	C7H7NO2	5369	Metabolic pathways;Biosynthesis of secondary metabolites;Microbial metabolism in diverse environments;Degradation of aromatic compounds;Biosynthesis of plant secondary metabolites;Biosynthesis of phenylpropanoids;Biosynthesis of amino acids;Biosynthesis of alkaloids derived from shikimate pathway;Tryptophan metabolism;Biosynthesis of various secondary metabolites - part 2;Aminobenzoate degradatio…	rp
FAUX	Isoniazid@1.043-rp	Isoniazid	137.059	1.043	C6H7N3O	3635	Other	rp
FAUX	SKF-97,541@8.547-rp	SKF-97,541	137.06	8.547	C4H12NO2P	5040	#N/A	rp
FAUX	SKF-97,541@9.016-rp	SKF-97,541	137.06	9.016	C4H12NO2P	5040	#N/A	rp
FAUX	2-Hydroxyphenethylamine@1.484-rp	2-Hydroxyphenethylamine	137.084	1.484	C8H11NO	#N/A	Metabolic pathways;Biosynthesis of secondary metabolites;Biosynthesis of plant secondary metabolites;Biosynthesis of alkaloids derived from shikimate pathway;Tyrosine metabolism;Other	rp
FAUX	2-Hydroxyphenethylamine@8.732-rp	2-Hydroxyphenethylamine	137.084	8.732	C8H11NO	#N/A	Metabolic pathways;Biosynthesis of secondary metabolites;Biosynthesis of plant secondary metabolites;Biosynthesis of alkaloids derived from shikimate pathway;Tyrosine metabolism;Other	rp
FAUX	2-Hydroxyphenethylamine@9.385-rp	2-Hydroxyphenethylamine	137.084	9.385	C8H11NO	#N/A	Metabolic pathways;Biosynthesis of secondary metabolites;Biosynthesis of plant secondary metabolites;Biosynthesis of alkaloids derived from shikimate pathway;Tyrosine metabolism;Other	rp
FAUX	isaxonine@1.034-rp	isaxonine	137.095	1.034	C7H11N3	64309	Microbial metabolism in diverse environments;Other	rp
FAUX	137.5741@1.051-rp	#N/A	137.574	1.051	#N/A	#N/A	#N/A	rp
FAUX	137.59236@1.031-rp	#N/A	137.592	1.031	#N/A	#N/A	#N/A	rp
FAUX	3-Sulfinopropanoicacid@1.422-rp	3-Sulfinopropanoicacid	137.999	1.422	C3H6O4S	2284634	#N/A	rp
FAUX	2-5-Dihydroxybenzaldehyde@4.242-rp	2-5-Dihydroxybenzaldehyde	138.032	4.242	C7H6O3	#N/A	Metabolic pathways;Biosynthesis of secondary metabolites;Microbial metabolism in diverse environments;Degradation of aromatic compounds;Biosynthesis of phenylpropanoids;Biosynthesis of alkaloids derived from shikimate pathway;Tyrosine metabolism;Phenylalanine metabolism;Ubiquinone and other terpenoid-quinone biosynthesis;Aminobenzoate degradation;Biosynthesis of plant hormones;Bile secretion;Other	rp
FAUX	2-5-Dihydroxybenzaldehyde@7.19-rp	2-5-Dihydroxybenzaldehyde	138.032	7.19	C7H6O3	#N/A	Metabolic pathways;Biosynthesis of secondary metabolites;Microbial metabolism in diverse environments;Degradation of aromatic compounds;Biosynthesis of phenylpropanoids;Biosynthesis of alkaloids derived from shikimate pathway;Tyrosine metabolism;Phenylalanine metabolism;Ubiquinone and other terpenoid-quinone biosynthesis;Aminobenzoate degradation;Biosynthesis of plant hormones;Bile secretion;Other	rp
FAUX	Salicylicacid@6.304-rp	Salicylicacid	138.032	6.304	C7H6O3	331	Metabolic pathways;Biosynthesis of secondary metabolites;Microbial metabolism in diverse environments;Degradation of aromatic compounds;Biosynthesis of phenylpropanoids;Biosynthesis of alkaloids derived from shikimate pathway;Tyrosine metabolism;Phenylalanine metabolism;Ubiquinone and other terpenoid-quinone biosynthesis;Aminobenzoate degradation;Biosynthesis of plant hormones;Bile secretion;Other	rp
FAUX	138.04214@1.456-rp	#N/A	138.042	1.456	#N/A	#N/A	Metabolic pathways;Other	rp
FAUX	Urocanicacid@1.477-rp	Urocanicacid	138.043	1.477	C6H6N2O2	643824	Metabolic pathways;Other	rp
FAUX	4-Nitroaniline@1.833-rp	4-Nitroaniline	138.043	1.833	C6H6N2O2	13846959	Metabolic pathways;Other	rp
FAUX	4-Nitroaniline@2.678-rp	4-Nitroaniline	138.043	2.678	C6H6N2O2	13846959	Metabolic pathways;Other	rp
FAUX	2-(4-Hydroxyphenyl)ethanol(Tyrosol)@2.557-rp	2-(4-Hydroxyphenyl)ethanol(Tyrosol)	138.068	2.557	C8H10O2	#N/A	Metabolic pathways;Microbial metabolism in diverse environments;Degradation of aromatic compounds;Tyrosine metabolism;Other	rp
FAUX	2-(4-Hydroxyphenyl)ethanol(Tyrosol)@8.22-rp	2-(4-Hydroxyphenyl)ethanol(Tyrosol)	138.068	8.22	C8H10O2	#N/A	Metabolic pathways;Microbial metabolism in diverse environments;Degradation of aromatic compounds;Tyrosine metabolism;Other	rp
FAUX	2-(4-Hydroxyphenyl)ethanol(Tyrosol)@1.744-rp	2-(4-Hydroxyphenyl)ethanol(Tyrosol)	138.068	1.744	C8H10O2	#N/A	Metabolic pathways;Microbial metabolism in diverse environments;Degradation of aromatic compounds;Tyrosine metabolism;Other	rp
FAUX	Tyrosol@6.281-rp	Tyrosol	138.068	6.281	C8H10O2	9964	Metabolic pathways;Microbial metabolism in diverse environments;Degradation of aromatic compounds;Tyrosine metabolism;Other	rp
FAUX	2-(4-Hydroxyphenyl)ethanol(Tyrosol)@6.591-rp	2-(4-Hydroxyphenyl)ethanol(Tyrosol)	138.068	6.591	C8H10O2	#N/A	Metabolic pathways;Microbial metabolism in diverse environments;Degradation of aromatic compounds;Tyrosine metabolism;Other	rp
FAUX	2-(4-Hydroxyphenyl)ethanol(Tyrosol)@6.082-rp	2-(4-Hydroxyphenyl)ethanol(Tyrosol)	138.068	6.082	C8H10O2	#N/A	Metabolic pathways;Microbial metabolism in diverse environments;Degradation of aromatic compounds;Tyrosine metabolism;Other	rp
FAUX	tyraminium@1.469-rp	tyraminium	138.092	1.469	C8H12NO	4401290	#N/A	rp
FAUX	3-6-Nonadienal@11.114-rp	3-6-Nonadienal	138.104	11.114	C9H14O	#N/A	Biosynthesis of secondary metabolites;Other	rp
FAUX	3-6-Nonadienal@18.565-rp	3-6-Nonadienal	138.104	18.565	C9H14O	#N/A	Biosynthesis of secondary metabolites;Other	rp
FAUX	3-6-Nonadienal@9.439-rp	3-6-Nonadienal	138.105	9.439	C9H14O	#N/A	Biosynthesis of secondary metabolites;Other	rp
FAUX	3-6-Nonadienal@9.866-rp	3-6-Nonadienal	138.105	9.866	C9H14O	#N/A	Biosynthesis of secondary metabolites;Other	rp
FAUX	138.10563@10.17-rp	#N/A	138.106	10.17	#N/A	#N/A	#N/A	rp
FAUX	Sulfamoylaceticacid@1.107-rp	Sulfamoylaceticacid	138.994	1.107	C2H5NO4S	9259107	#N/A	rp
FAUX	3-Hydroxypicolinicacid@5.067-rp	3-Hydroxypicolinicacid	139.027	5.067	C6H5NO3	#N/A	Metabolic pathways;Microbial metabolism in diverse environments;Aminobenzoate degradation;Other	rp
FAUX	3-Hydroxypicolinicacid@2.33-rp	3-Hydroxypicolinicacid	139.027	2.33	C6H5NO3	#N/A	Metabolic pathways;Microbial metabolism in diverse environments;Aminobenzoate degradation;Other	rp
FAUX	3-Hydroxypicolinicacid@1.63-rp	3-Hydroxypicolinicacid	139.027	1.63	C6H5NO3	#N/A	Metabolic pathways;Microbial metabolism in diverse environments;Aminobenzoate degradation;Other	rp
FAUX	6-Hydroxynicotinicacid@2.826-rp	6-Hydroxynicotinicacid	139.027	2.826	C6H5NO3	#N/A	Metabolic pathways;Microbial metabolism in diverse environments;Aminobenzoate degradation;Other	rp
FAUX	3-Hydroxypicolinicacid@9.386-rp	3-Hydroxypicolinicacid	139.027	9.386	C6H5NO3	#N/A	Metabolic pathways;Microbial metabolism in diverse environments;Aminobenzoate degradation;Other	rp
FAUX	2-methylaminoethylphosphonicacid@8.126-rp	2-methylaminoethylphosphonicacid	139.039	8.126	C3H10NO3P	247708	Other	rp
FAUX	2-methylaminoethylphosphonicacid@5.305-rp	2-methylaminoethylphosphonicacid	139.04	5.305	C3H10NO3P	247708	Other	rp
FAUX	139.06226@1.051-rp	#N/A	139.062	1.051	#N/A	#N/A	#N/A	rp
FAUX	Gabaculine@1.581-rp	Gabaculine	139.063	1.581	C7H9NO2	3327	#N/A	rp
FAUX	Gabaculine@4.398-rp	Gabaculine	139.063	4.398	C7H9NO2	3327	#N/A	rp
FAUX	Gabaculine@1.14-rp	Gabaculine	139.063	1.14	C7H9NO2	3327	#N/A	rp
FAUX	Gabaculine@1.97-rp	Gabaculine	139.063	1.97	C7H9NO2	3327	#N/A	rp
FAUX	Gabaculine@1.04-rp	Gabaculine	139.064	1.04	C7H9NO2	3327	#N/A	rp
FAUX	Gabaculine@6.535-rp	Gabaculine	139.064	6.535	C7H9NO2	3327	#N/A	rp
FAUX	Gabaculine@2.304-rp	Gabaculine	139.064	2.304	C7H9NO2	3327	#N/A	rp
FAUX	Gabaculine@2.948-rp	Gabaculine	139.064	2.948	C7H9NO2	3327	#N/A	rp
FAUX	139.07306@1.183-rp	#N/A	139.073	1.183	#N/A	#N/A	#N/A	rp
FAUX	4-Amino-5-hydroxymethyl-2-methylpyrimidine@1.144-rp	4-Amino-5-hydroxymethyl-2-methylpyrimidine	139.075	1.144	C6H9N3O	#N/A	Metabolic pathways;Biosynthesis of secondary metabolites;ABC transporters;Other	rp
FAUX	139.52102@6.283-rp	#N/A	139.521	6.283	#N/A	#N/A	#N/A	rp
FAUX	Sulfoacetate@1.131-rp	Sulfoacetate	139.978	1.131	C2H4O5S	#N/A	Other	rp
FAUX	1753832@1.146-rp	1753832	140.015	1.146	C3H8O4S	76821	#N/A	rp
FAUX	3-Azido-4-oxo-2-azetidinecarbaldehyde@2.371-rp	3-Azido-4-oxo-2-azetidinecarbaldehyde	140.034	2.371	C4H4N4O2	21378625	#N/A	rp
FAUX	140.04362@0.898-rp	#N/A	140.044	0.898	C2H8N2O5	#N/A	#N/A	rp
FAUX	2-3-5-Trihydroxytoluene@7.699-rp	2-3-5-Trihydroxytoluene	140.047	7.699	C7H8O3	#N/A	Microbial metabolism in diverse environments;Other	rp
FAUX	2-3-5-Trihydroxytoluene@2.637-rp	2-3-5-Trihydroxytoluene	140.048	2.637	C7H8O3	#N/A	Microbial metabolism in diverse environments;Other	rp
FAUX	Methylimidazoleaceticacid@1.151-rp	Methylimidazoleaceticacid	140.059	1.151	C6H8N2O2	#N/A	Metabolic pathways;Other	rp
FAUX	TMSI@1.407-rp	TMSI	140.077	1.407	C6H12N2Si	26905	#N/A	rp
FAUX	140.0936@1.48-rp	#N/A	140.094	1.48	#N/A	#N/A	#N/A	rp
FAUX	140.09397@1.041-rp	#N/A	140.094	1.041	#N/A	#N/A	#N/A	rp
FAUX	2,3,4,7,8,8a-hexahydro-1H-pyrrolo[1,2-a]pyrazin-6-one@1.049-rp	2,3,4,7,8,8a-hexahydro-1H-pyrrolo[1,2-a]pyrazin-6-one	140.095	1.049	C7H12N2O	8995914	#N/A	rp
FAUX	RA8509050@11.116-rp	RA8509050	140.12	11.116	C9H16O	4446456	#N/A	rp
FAUX	RA8509050@10.837-rp	RA8509050	140.12	10.837	C9H16O	4446456	#N/A	rp
FAUX	RA8509050@10.078-rp	RA8509050	140.12	10.078	C9H16O	4446456	#N/A	rp
FAUX	140.55579@1.057-rp	#N/A	140.556	1.057	#N/A	#N/A	#N/A	rp
FAUX	O-Phosphorylethanolamine@20.884-rp	O-Phosphorylethanolamine	141.019	20.884	C2H8NO4P	#N/A	Metabolic pathways;Other	rp
FAUX	Thiazole,2-propionyl-@9.904-rp	Thiazole,2-propionyl-	141.025	9.904	C6H7NOS	58779	#N/A	rp
FAUX	141.02776@0.891-rp	#N/A	141.028	0.891	#N/A	#N/A	#N/A	rp
FAUX	141.04022@1.033-rp	#N/A	141.04	1.033	C2H3N7O	#N/A	#N/A	rp
FAUX	2-Aminomuconatesemialdehyde@1.567-rp	2-Aminomuconatesemialdehyde	141.043	1.567	C6H7NO3	#N/A	Metabolic pathways;Microbial metabolism in diverse environments;Tryptophan metabolism;Aminobenzoate degradation;Other	rp
FAUX	2-Aminomuconatesemialdehyde@1.152-rp	2-Aminomuconatesemialdehyde	141.043	1.152	C6H7NO3	#N/A	Metabolic pathways;Microbial metabolism in diverse environments;Tryptophan metabolism;Aminobenzoate degradation;Other	rp
FAUX	2-Aminomuconatesemialdehyde@3.174-rp	2-Aminomuconatesemialdehyde	141.043	3.174	C6H7NO3	#N/A	Metabolic pathways;Microbial metabolism in diverse environments;Tryptophan metabolism;Aminobenzoate degradation;Other	rp
FAUX	2-Aminomuconatesemialdehyde@1.756-rp	2-Aminomuconatesemialdehyde	141.043	1.756	C6H7NO3	#N/A	Metabolic pathways;Microbial metabolism in diverse environments;Tryptophan metabolism;Aminobenzoate degradation;Other	rp
FAUX	Dimetridazole@2.103-rp	Dimetridazole	141.054	2.103	C5H7N3O2	2980	#N/A	rp
FAUX	2,5,6-Triaminopyrimidin-4-ol@1.234-rp	2,5,6-Triaminopyrimidin-4-ol	141.065	1.234	C4H7N5O	63663	#N/A	rp
FAUX	4-amino-2-imino-5,5-dimethyl-2,5-dihydro-1h-imidazol-1-yloxyradical@1.082-rp	4-amino-2-imino-5,5-dimethyl-2,5-dihydro-1h-imidazol-1-yloxyradical	141.078	1.082	C5H9N4O	4446997	#N/A	rp
FAUX	L-Hypoglycin@1.589-rp	L-Hypoglycin	141.079	1.589	C7H11NO2	#N/A	#N/A	rp
FAUX	L-Hypoglycin@1.321-rp	L-Hypoglycin	141.079	1.321	C7H11NO2	#N/A	#N/A	rp
FAUX	L-Hypoglycin@1.113-rp	L-Hypoglycin	141.079	1.113	C7H11NO2	#N/A	#N/A	rp
FAUX	L-Hypoglycin@4.019-rp	L-Hypoglycin	141.079	4.019	C7H11NO2	#N/A	#N/A	rp
FAUX	L-Hypoglycin@4.397-rp	L-Hypoglycin	141.079	4.397	C7H11NO2	#N/A	#N/A	rp
FAUX	L-Hypoglycin@1.946-rp	L-Hypoglycin	141.079	1.946	C7H11NO2	#N/A	#N/A	rp
FAUX	L-Histidinol@1.409-rp	L-Histidinol	141.09	1.409	C6H11N3O	#N/A	Metabolic pathways;Biosynthesis of secondary metabolites;Biosynthesis of amino acids;Other	rp
FAUX	L-Histidinol@1.48-rp	L-Histidinol	141.091	1.48	C6H11N3O	#N/A	Metabolic pathways;Biosynthesis of secondary metabolites;Biosynthesis of amino acids;Other	rp
FAUX	Crotono-betaine@1.746-rp	Crotono-betaine	141.115	1.746	C8H15NO	#N/A	Metabolic pathways;Biosynthesis of secondary metabolites;Other	rp
FAUX	Crotono-betaine@1.484-rp	Crotono-betaine	141.116	1.484	C8H15NO	#N/A	Metabolic pathways;Biosynthesis of secondary metabolites;Other	rp
FAUX	141.5767@1.467-rp	#N/A	141.577	1.467	#N/A	#N/A	#N/A	rp
FAUX	141.58222@1.155-rp	#N/A	141.582	1.155	#N/A	#N/A	#N/A	rp
FAUX	141.94079@1.002-rp	#N/A	141.941	1.002	CH4O2P2S	#N/A	#N/A	rp
FAUX	2-Mercaptoethanesulfonate@1.43-rp	2-Mercaptoethanesulfonate	141.976	1.43	C2H6O3S2	#N/A	Metabolic pathways;Microbial metabolism in diverse environments;Other	rp
FAUX	2-Mercaptoethanesulfonate@1.234-rp	2-Mercaptoethanesulfonate	141.976	1.234	C2H6O3S2	#N/A	Metabolic pathways;Microbial metabolism in diverse environments;Other	rp
FAUX	141.99387@1.105-rp	#N/A	141.994	1.105	C4H3N2O2P	#N/A	#N/A	rp
FAUX	142.01179@0.892-rp	#N/A	142.012	0.892	#N/A	#N/A	#N/A	rp
FAUX	142.02437@0.969-rp	#N/A	142.024	0.969	#N/A	#N/A	#N/A	rp
FAUX	1-2-3-5-Tetrahydroxybenzene@1.148-rp	1-2-3-5-Tetrahydroxybenzene	142.027	1.148	C6H6O4	#N/A	Metabolic pathways;Microbial metabolism in diverse environments;Degradation of aromatic compounds;Other	rp
FAUX	1-2-3-5-Tetrahydroxybenzene@2.021-rp	1-2-3-5-Tetrahydroxybenzene	142.027	2.021	C6H6O4	#N/A	Metabolic pathways;Microbial metabolism in diverse environments;Degradation of aromatic compounds;Other	rp
FAUX	1-2-3-5-Tetrahydroxybenzene@1.455-rp	1-2-3-5-Tetrahydroxybenzene	142.027	1.455	C6H6O4	#N/A	Metabolic pathways;Microbial metabolism in diverse environments;Degradation of aromatic compounds;Other	rp
FAUX	4-Imidazolone-5-acetate@1.096-rp	4-Imidazolone-5-acetate	142.038	1.096	C5H6N2O3	#N/A	Metabolic pathways;Other	rp
FAUX	4-Oxocyclohexanecarboxylate@1.712-rp	4-Oxocyclohexanecarboxylate	142.063	1.712	C7H10O3	#N/A	#N/A	rp
FAUX	4-Oxocyclohexanecarboxylate@5.388-rp	4-Oxocyclohexanecarboxylate	142.063	5.388	C7H10O3	#N/A	#N/A	rp
FAUX	4-Oxocyclohexanecarboxylate@2.874-rp	4-Oxocyclohexanecarboxylate	142.063	2.874	C7H10O3	#N/A	#N/A	rp
FAUX	Ectoine@1.489-rp	Ectoine	142.075	1.489	C6H10N2O2	670	Metabolic pathways;Microbial metabolism in diverse environments;Other	rp
FAUX	2-en-valproicacid@9.895-rp	2-en-valproicacid	142.099	9.895	C8H14O2	#N/A	Biosynthesis of secondary metabolites;Other	rp
FAUX	2-en-valproicacid@8.614-rp	2-en-valproicacid	142.099	8.614	C8H14O2	#N/A	Biosynthesis of secondary metabolites;Other	rp
FAUX	2-en-valproicacid@7.212-rp	2-en-valproicacid	142.1	7.212	C8H14O2	#N/A	Biosynthesis of secondary metabolites;Other	rp
FAUX	Cyclohexylurea@1.272-rp	Cyclohexylurea	142.111	1.272	C7H14N2O	62885	#N/A	rp
FAUX	142.56633@1.054-rp	#N/A	142.566	1.054	#N/A	#N/A	#N/A	rp
FAUX	142.5719@1.034-rp	#N/A	142.572	1.034	#N/A	#N/A	#N/A	rp
FAUX	143.00694@0.883-rp	#N/A	143.007	0.883	#N/A	#N/A	#N/A	rp
FAUX	143.0133@6.584-rp	#N/A	143.013	6.584	C5H6NO2P	#N/A	#N/A	rp
FAUX	N-formylmaleamicacid@1.113-rp	N-formylmaleamicacid	143.022	1.113	C5H5NO4	416436	Metabolic pathways;Microbial metabolism in diverse environments;Other	rp
FAUX	143.02524@0.892-rp	#N/A	143.025	0.892	C4H6N3OP	#N/A	#N/A	rp
FAUX	143.02996@0.918-rp	#N/A	143.03	0.918	#N/A	#N/A	#N/A	rp
FAUX	143.03707@6.584-rp	#N/A	143.037	6.584	C9H5NO	#N/A	#N/A	rp
FAUX	143.05611@1.057-rp	#N/A	143.056	1.057	C2H5N7O	#N/A	#N/A	rp
FAUX	472437@1.108-rp	472437	143.058	1.108	C6H9NO3	19974018	#N/A	rp
FAUX	472437@4.546-rp	472437	143.058	4.546	C6H9NO3	19974018	#N/A	rp
FAUX	trimethadione@2.567-rp	trimethadione	143.058	2.567	C6H9NO3	5374	#N/A	rp
FAUX	6-Oxo-pipecolinicacid@1.955-rp	6-Oxo-pipecolinicacid	143.058	1.955	C6H9NO3	2282737	#N/A	rp
FAUX	472437@1.55-rp	472437	143.058	1.55	C6H9NO3	19974018	#N/A	rp
FAUX	6-Oxo-pipecolinicacid@2.159-rp	6-Oxo-pipecolinicacid	143.058	2.159	C6H9NO3	2282737	#N/A	rp
FAUX	6-Oxo-pipecolinicacid@1.842-rp	6-Oxo-pipecolinicacid	143.058	1.842	C6H9NO3	2282737	#N/A	rp
FAUX	trimethadione@3.455-rp	trimethadione	143.058	3.455	C6H9NO3	5374	#N/A	rp
FAUX	trimethadione@1.727-rp	trimethadione	143.059	1.727	C6H9NO3	5374	#N/A	rp
FAUX	143.05977@1.813-rp	#N/A	143.06	1.813	#N/A	#N/A	#N/A	rp
FAUX	CYCLOCREATINE@1.067-rp	CYCLOCREATINE	143.07	1.067	C5H9N3O2	2793	#N/A	rp
FAUX	1-naphthylamine@3.127-rp	1-naphthylamine	143.074	3.127	C10H9N	#N/A	Other	rp
FAUX	6-Methylquinoline@4.701-rp	6-Methylquinoline	143.074	4.701	C10H9N	#N/A	Other	rp
FAUX	1-naphthylamine@3.488-rp	1-naphthylamine	143.074	3.488	C10H9N	#N/A	Other	rp
FAUX	143.09388@1.492-rp	#N/A	143.094	1.492	#N/A	#N/A	ABC transporters	rp
FAUX	Stachydrine@4.015-rp	Stachydrine	143.095	4.015	C7H13NO2	103115	ABC transporters	rp
FAUX	DL-Stachydrine@1.273-rp	DL-Stachydrine	143.095	1.273	C7H13NO2	#N/A	ABC transporters	rp
FAUX	Stachydrine@3.011-rp	Stachydrine	143.095	3.011	C7H13NO2	103115	ABC transporters	rp
FAUX	Stachydrine@1.518-rp	Stachydrine	143.095	1.518	C7H13NO2	103115	ABC transporters	rp
FAUX	143.11855@1.035-rp	#N/A	143.119	1.035	#N/A	#N/A	#N/A	rp
FAUX	143.5635@4.716-rp	#N/A	143.564	4.716	#N/A	#N/A	#N/A	rp
FAUX	143.59802@1.112-rp	#N/A	143.598	1.112	#N/A	#N/A	#N/A	rp
FAUX	143.61062@1.057-rp	#N/A	143.611	1.057	#N/A	#N/A	#N/A	rp
FAUX	DC1050000@1.424-rp	DC1050000	143.981	1.424	C6H5ClS	7527	#N/A	rp
FAUX	NP-019988@9.299-rp	NP-019988	144.021	9.299	C10H10O4	#N/A	#N/A	rp
FAUX	144.02134@7.62-rp	#N/A	144.021	7.62	C9H4O2	#N/A	#N/A	rp
FAUX	2-3-Dimethylmaleate@16.774-rp	2-3-Dimethylmaleate	144.042	16.774	C6H8O4	#N/A	Microbial metabolism in diverse environments;Other	rp
FAUX	2-3-Dimethylmaleate@14.914-rp	2-3-Dimethylmaleate	144.042	14.914	C6H8O4	#N/A	Microbial metabolism in diverse environments;Other	rp
FAUX	2-3-Dimethylmaleate@1.192-rp	2-3-Dimethylmaleate	144.042	1.192	C6H8O4	#N/A	Microbial metabolism in diverse environments;Other	rp
FAUX	2-3-Dimethylmaleate@1.454-rp	2-3-Dimethylmaleate	144.042	1.454	C6H8O4	#N/A	Microbial metabolism in diverse environments;Other	rp
FAUX	2-3-Dimethylmaleate@2.146-rp	2-3-Dimethylmaleate	144.042	2.146	C6H8O4	#N/A	Microbial metabolism in diverse environments;Other	rp
FAUX	2-3-Dimethylmaleate@4.133-rp	2-3-Dimethylmaleate	144.042	4.133	C6H8O4	#N/A	Microbial metabolism in diverse environments;Other	rp
FAUX	2-Oxohexahydro-4-pyrimidinecarboxylicacid@1.477-rp	2-Oxohexahydro-4-pyrimidinecarboxylicacid	144.054	1.477	C5H8N2O3	7969583	#N/A	rp
FAUX	2-Oxohexahydro-4-pyrimidinecarboxylicacid@1.053-rp	2-Oxohexahydro-4-pyrimidinecarboxylicacid	144.054	1.053	C5H8N2O3	7969583	#N/A	rp
FAUX	1-naphthol@10.025-rp	1-naphthol	144.057	10.025	C10H8O	#N/A	Other	rp
FAUX	2-phenylimidazole@4.715-rp	2-phenylimidazole	144.069	4.715	C9H8N2	#N/A	#N/A	rp
FAUX	7-oxoheptanoate@2.873-rp	7-oxoheptanoate	144.079	2.873	C7H12O3	#N/A	Metabolic pathways;Microbial metabolism in diverse environments;Other	rp
FAUX	7-oxoheptanoate@7.217-rp	7-oxoheptanoate	144.079	7.217	C7H12O3	#N/A	Metabolic pathways;Microbial metabolism in diverse environments;Other	rp
FAUX	7-oxoheptanoate@7.664-rp	7-oxoheptanoate	144.079	7.664	C7H12O3	#N/A	Metabolic pathways;Microbial metabolism in diverse environments;Other	rp
FAUX	L-isoglutamine@1.03-rp	L-isoglutamine	144.09	1.03	C6H12N2O2	#N/A	#N/A	rp
FAUX	4-pentynylbenzene@14.357-rp	4-pentynylbenzene	144.094	14.357	C11H12	67151	#N/A	rp
FAUX	4-pentynylbenzene@13.386-rp	4-pentynylbenzene	144.094	13.386	C11H12	67151	#N/A	rp
FAUX	4-pentynylbenzene@16.259-rp	4-pentynylbenzene	144.094	16.259	C11H12	67151	#N/A	rp
FAUX	4-pentynylbenzene@8.297-rp	4-pentynylbenzene	144.094	8.297	C11H12	67151	#N/A	rp
FAUX	4-pentynylbenzene@8.418-rp	4-pentynylbenzene	144.094	8.418	C11H12	67151	#N/A	rp
FAUX	4-pentynylbenzene@13.909-rp	4-pentynylbenzene	144.094	13.909	C11H12	67151	#N/A	rp
FAUX	4-pentynylbenzene@8.789-rp	4-pentynylbenzene	144.094	8.789	C11H12	67151	#N/A	rp
FAUX	Valproicacid@9.894-rp	Valproicacid	144.115	9.894	C8H16O2	3009	Metabolic pathways;Biosynthesis of plant secondary metabolites;Bile secretion;Other	rp
FAUX	N-Acetylcadaverine@1.25-rp	N-Acetylcadaverine	144.126	1.25	C7H16N2O	164295	#N/A	rp
FAUX	144.56944@1.049-rp	#N/A	144.569	1.049	#N/A	#N/A	#N/A	rp
FAUX	144.87282@1.098-rp	#N/A	144.873	1.098	#N/A	#N/A	#N/A	rp
FAUX	144.98858@1.42-rp	#N/A	144.989	1.42	#N/A	#N/A	#N/A	rp
FAUX	3-4-Dehydrothiomorpholine-3-carboxylate@1.203-rp	3-4-Dehydrothiomorpholine-3-carboxylate	145.02	1.203	C5H7NO2S	#N/A	#N/A	rp
FAUX	2-Oxoglutaramate@2.077-rp	2-Oxoglutaramate	145.038	2.077	C5H7NO4	#N/A	Metabolic pathways;Other	rp
FAUX	2-Oxoglutaramate@1.182-rp	2-Oxoglutaramate	145.038	1.182	C5H7NO4	#N/A	Metabolic pathways;Other	rp
FAUX	1(2H)-Isoquinolinone@2.861-rp	1(2H)-Isoquinolinone	145.053	2.861	C9H7NO	#N/A	#N/A	rp
FAUX	1(2H)-Isoquinolinone@16.919-rp	1(2H)-Isoquinolinone	145.053	16.919	C9H7NO	#N/A	#N/A	rp
FAUX	1(2H)-Isoquinolinone@6.508-rp	1(2H)-Isoquinolinone	145.053	6.508	C9H7NO	#N/A	#N/A	rp
FAUX	8-Hydroxyquinoline@3.185-rp	8-Hydroxyquinoline	145.053	3.185	C9H7NO	1847	#N/A	rp
FAUX	1(2H)-Isoquinolinone@8.859-rp	1(2H)-Isoquinolinone	145.053	8.859	C9H7NO	#N/A	#N/A	rp
FAUX	1(2H)-Isoquinolinone@2.481-rp	1(2H)-Isoquinolinone	145.053	2.481	C9H7NO	#N/A	#N/A	rp
FAUX	4-Indolecarbaldehyde@7.359-rp	4-Indolecarbaldehyde	145.053	7.359	C9H7NO	#N/A	#N/A	rp
FAUX	8-Hydroxyquinoline@7.621-rp	8-Hydroxyquinoline	145.053	7.621	C9H7NO	1847	#N/A	rp
FAUX	4-Indolecarbaldehyde@5.356-rp	4-Indolecarbaldehyde	145.053	5.356	C9H7NO	#N/A	#N/A	rp
FAUX	4-Indolecarbaldehyde@6.906-rp	4-Indolecarbaldehyde	145.053	6.906	C9H7NO	#N/A	#N/A	rp
FAUX	4-Indolecarbaldehyde@9.652-rp	4-Indolecarbaldehyde	145.053	9.652	C9H7NO	#N/A	#N/A	rp
FAUX	1(2H)-Isoquinolinone@4.033-rp	1(2H)-Isoquinolinone	145.053	4.033	C9H7NO	#N/A	#N/A	rp
FAUX	Indole-3-lacticacid@8.4-rp	Indole-3-lacticacid	145.053	8.4	C11H11NO3	#N/A	#N/A	rp
FAUX	145.05603@1.627-rp	#N/A	145.056	1.627	C6H11NOS	#N/A	#N/A	rp
FAUX	[FAoxo-amino(6:0)]3-oxo-5S-amino-hexanoicacid@0.917-rp	[FAoxo-amino(6:0)]3-oxo-5S-amino-hexanoicacid	145.074	0.917	C6H11NO3	#N/A	Metabolic pathways;Biosynthesis of secondary metabolites;Biosynthesis of plant secondary metabolites;Biosynthesis of amino acids;Other	rp
FAUX	[FAoxo-amino(6:0)]3-oxo-5S-amino-hexanoicacid@1.553-rp	[FAoxo-amino(6:0)]3-oxo-5S-amino-hexanoicacid	145.074	1.553	C6H11NO3	#N/A	Metabolic pathways;Biosynthesis of secondary metabolites;Biosynthesis of plant secondary metabolites;Biosynthesis of amino acids;Other	rp
FAUX	[FAoxo-amino(6:0)]3-oxo-5S-amino-hexanoicacid@1.704-rp	[FAoxo-amino(6:0)]3-oxo-5S-amino-hexanoicacid	145.074	1.704	C6H11NO3	#N/A	Metabolic pathways;Biosynthesis of secondary metabolites;Biosynthesis of plant secondary metabolites;Biosynthesis of amino acids;Other	rp
FAUX	[FAoxo-amino(6:0)]3-oxo-5S-amino-hexanoicacid@3.026-rp	[FAoxo-amino(6:0)]3-oxo-5S-amino-hexanoicacid	145.074	3.026	C6H11NO3	#N/A	Metabolic pathways;Biosynthesis of secondary metabolites;Biosynthesis of plant secondary metabolites;Biosynthesis of amino acids;Other	rp
FAUX	[FAoxo-amino(6:0)]3-oxo-5S-amino-hexanoicacid@2.365-rp	[FAoxo-amino(6:0)]3-oxo-5S-amino-hexanoicacid	145.074	2.365	C6H11NO3	#N/A	Metabolic pathways;Biosynthesis of secondary metabolites;Biosynthesis of plant secondary metabolites;Biosynthesis of amino acids;Other	rp
FAUX	[FAoxo-amino(6:0)]3-oxo-5S-amino-hexanoicacid@3.451-rp	[FAoxo-amino(6:0)]3-oxo-5S-amino-hexanoicacid	145.074	3.451	C6H11NO3	#N/A	Metabolic pathways;Biosynthesis of secondary metabolites;Biosynthesis of plant secondary metabolites;Biosynthesis of amino acids;Other	rp
FAUX	[FAoxo-amino(6:0)]3-oxo-5S-amino-hexanoicacid@2.03-rp	[FAoxo-amino(6:0)]3-oxo-5S-amino-hexanoicacid	145.074	2.03	C6H11NO3	#N/A	Metabolic pathways;Biosynthesis of secondary metabolites;Biosynthesis of plant secondary metabolites;Biosynthesis of amino acids;Other	rp
FAUX	4-Guanidinobutyricacid@1.21-rp	4-Guanidinobutyricacid	145.085	1.21	C5H11N3O2	#N/A	Metabolic pathways;Other	rp
FAUX	3-Dehydroxycarnitine@1.109-rp	3-Dehydroxycarnitine	145.11	1.109	C7H15NO2	#N/A	#N/A	rp
FAUX	3-Dehydroxycarnitine@2.625-rp	3-Dehydroxycarnitine	145.11	2.625	C7H15NO2	#N/A	#N/A	rp
FAUX	3-Dehydroxycarnitine@1.441-rp	3-Dehydroxycarnitine	145.11	1.441	C7H15NO2	#N/A	#N/A	rp
FAUX	145.11137@1.458-rp	#N/A	145.111	1.458	#N/A	#N/A	#N/A	rp
FAUX	L-Lysinamide@1.48-rp	L-Lysinamide	145.122	1.48	C6H15N3O	388683	#N/A	rp
FAUX	145.12234@1.493-rp	#N/A	145.122	1.493	#N/A	#N/A	#N/A	rp
FAUX	Hexyl(dimethyl)amineoxide@1.474-rp	Hexyl(dimethyl)amineoxide	145.147	1.474	C8H19NO	2543805	#N/A	rp
FAUX	1,4-dichlorobenzene@11.116-rp	1,4-dichlorobenzene	145.969	11.116	C6H4Cl2	#N/A	Metabolic pathways;Microbial metabolism in diverse environments;Degradation of aromatic compounds;Other	rp
FAUX	146.00548@1.595-rp	#N/A	146.005	1.595	C5H8OP2	#N/A	#N/A	rp
FAUX	2-Oxoglutaricacid@1.28-rp	2-Oxoglutaricacid	146.022	1.28	C5H6O5	#N/A	Metabolic pathways;Biosynthesis of secondary metabolites;Microbial metabolism in diverse environments;Biosynthesis of plant secondary metabolites;Biosynthesis of phenylpropanoids;Biosynthesis of amino acids;2-Oxocarboxylic acid metabolism;Biosynthesis of alkaloids derived from shikimate pathway;Biosynthesis of plant hormones;Bile secretion;Other	rp
FAUX	2-Oxoglutaricacid@1.431-rp	2-Oxoglutaricacid	146.022	1.431	C5H6O5	#N/A	Metabolic pathways;Biosynthesis of secondary metabolites;Microbial metabolism in diverse environments;Biosynthesis of plant secondary metabolites;Biosynthesis of phenylpropanoids;Biosynthesis of amino acids;2-Oxocarboxylic acid metabolism;Biosynthesis of alkaloids derived from shikimate pathway;Biosynthesis of plant hormones;Bile secretion;Other	rp
FAUX	2-Oxoglutaricacid@1.17-rp	2-Oxoglutaricacid	146.022	1.17	C5H6O5	#N/A	Metabolic pathways;Biosynthesis of secondary metabolites;Microbial metabolism in diverse environments;Biosynthesis of plant secondary metabolites;Biosynthesis of phenylpropanoids;Biosynthesis of amino acids;2-Oxocarboxylic acid metabolism;Biosynthesis of alkaloids derived from shikimate pathway;Biosynthesis of plant hormones;Bile secretion;Other	rp
FAUX	146.03588@11.796-rp	#N/A	146.036	11.796	C3H7N4OP	#N/A	Biosynthesis of secondary metabolites;Phenylpropanoid biosynthesis	rp
FAUX	Coumarin@11.655-rp	Coumarin	146.036	11.655	C9H6O2	13848793	Biosynthesis of secondary metabolites;Phenylpropanoid biosynthesis	rp
FAUX	Coumarin@13.211-rp	Coumarin	146.037	13.211	C9H6O2	13848793	Biosynthesis of secondary metabolites;Phenylpropanoid biosynthesis	rp
FAUX	3-(4-hydroxy-3-methoxyphenyl)propanoicacid@7.594-rp	3-(4-hydroxy-3-methoxyphenyl)propanoicacid	146.037	7.594	C10H12O4	#N/A	Biosynthesis of secondary metabolites;Phenylpropanoid biosynthesis	rp
FAUX	2-Hydroxycinnamicacid@8.895-rp	2-Hydroxycinnamicacid	146.037	8.895	C9H8O3	#N/A	Biosynthesis of secondary metabolites;Phenylpropanoid biosynthesis	rp
FAUX	Coumarin@8.454-rp	Coumarin	146.037	8.454	C9H6O2	13848793	Biosynthesis of secondary metabolites;Phenylpropanoid biosynthesis	rp
FAUX	Coumarin@11.827-rp	Coumarin	146.037	11.827	C9H6O2	13848793	Biosynthesis of secondary metabolites;Phenylpropanoid biosynthesis	rp
FAUX	Coumarin@1.79-rp	Coumarin	146.037	1.79	C9H6O2	13848793	Biosynthesis of secondary metabolites;Phenylpropanoid biosynthesis	rp
FAUX	2-Hydroxycinnamicacid@8.766-rp	2-Hydroxycinnamicacid	146.037	8.766	C9H8O3	#N/A	Biosynthesis of secondary metabolites;Phenylpropanoid biosynthesis	rp
FAUX	Coumarin@4.635-rp	Coumarin	146.037	4.635	C9H6O2	13848793	Biosynthesis of secondary metabolites;Phenylpropanoid biosynthesis	rp
FAUX	Coumarin@7.88-rp	Coumarin	146.037	7.88	C9H6O2	13848793	Biosynthesis of secondary metabolites;Phenylpropanoid biosynthesis	rp
FAUX	Coumarin@1.499-rp	Coumarin	146.037	1.499	C9H6O2	13848793	Biosynthesis of secondary metabolites;Phenylpropanoid biosynthesis	rp
FAUX	Coumarin@6.889-rp	Coumarin	146.037	6.889	C9H6O2	13848793	Biosynthesis of secondary metabolites;Phenylpropanoid biosynthesis	rp
FAUX	4-Cyanobenzamide@3.207-rp	4-Cyanobenzamide	146.048	3.207	C8H6N2O	68899	#N/A	rp
FAUX	(R)-4-Dehydropantoate@1.218-rp	(R)-4-Dehydropantoate	146.058	1.218	C6H10O4	#N/A	Metabolic pathways;Biosynthesis of secondary metabolites;Microbial metabolism in diverse environments;Degradation of aromatic compounds;Biosynthesis of amino acids;2-Oxocarboxylic acid metabolism;Aminobenzoate degradation;Other	rp
FAUX	(R)-4-Dehydropantoate@1.071-rp	(R)-4-Dehydropantoate	146.058	1.071	C6H10O4	#N/A	Metabolic pathways;Biosynthesis of secondary metabolites;Microbial metabolism in diverse environments;Degradation of aromatic compounds;Biosynthesis of amino acids;2-Oxocarboxylic acid metabolism;Aminobenzoate degradation;Other	rp
FAUX	3-Methylglutaricacid@3.455-rp	3-Methylglutaricacid	146.058	3.455	C6H10O4	#N/A	Metabolic pathways;Biosynthesis of secondary metabolites;Microbial metabolism in diverse environments;Degradation of aromatic compounds;Biosynthesis of amino acids;2-Oxocarboxylic acid metabolism;Aminobenzoate degradation;Other	rp
FAUX	3-Methylglutaricacid@3.91-rp	3-Methylglutaricacid	146.058	3.91	C6H10O4	#N/A	Metabolic pathways;Biosynthesis of secondary metabolites;Microbial metabolism in diverse environments;Degradation of aromatic compounds;Biosynthesis of amino acids;2-Oxocarboxylic acid metabolism;Aminobenzoate degradation;Other	rp
FAUX	(R)-4-Dehydropantoate@1.917-rp	(R)-4-Dehydropantoate	146.058	1.917	C6H10O4	#N/A	Metabolic pathways;Biosynthesis of secondary metabolites;Microbial metabolism in diverse environments;Degradation of aromatic compounds;Biosynthesis of amino acids;2-Oxocarboxylic acid metabolism;Aminobenzoate degradation;Other	rp
FAUX	3-Ureidoisobutyrate@1.732-rp	3-Ureidoisobutyrate	146.069	1.732	C5H10N2O3	#N/A	Metabolic pathways;Microbial metabolism in diverse environments;Biosynthesis of plant secondary metabolites;Biosynthesis of amino acids;ABC transporters;Other	rp
FAUX	Ureidoisobutyricacid@1.049-rp	Ureidoisobutyricacid	146.069	1.049	C5H10N2O3	141172	Metabolic pathways;Microbial metabolism in diverse environments;Biosynthesis of plant secondary metabolites;Biosynthesis of amino acids;ABC transporters;Other	rp
FAUX	2-[(1E)-1-Propen-1-yl]benzaldehyde@8.8-rp	2-[(1E)-1-Propen-1-yl]benzaldehyde	146.073	8.8	C10H10O	9190159	#N/A	rp
FAUX	Benzylideneacetone@8.469-rp	Benzylideneacetone	146.073	8.469	C10H10O	21106584	#N/A	rp
FAUX	Benzylideneacetone@6.57-rp	Benzylideneacetone	146.073	6.57	C10H10O	21106584	#N/A	rp
FAUX	n-Butyllactate@8.485-rp	n-Butyllactate	146.094	8.485	C7H14O3	8409	#N/A	rp
FAUX	146.10456@1.066-rp	#N/A	146.105	1.066	#N/A	#N/A	#N/A	rp
FAUX	(3S)-3-6-Diaminohexanoate@0.955-rp	(3S)-3-6-Diaminohexanoate	146.106	0.955	C6H14N2O2	#N/A	Metabolic pathways;Biosynthesis of secondary metabolites;Microbial metabolism in diverse environments;Biosynthesis of plant secondary metabolites;Biosynthesis of amino acids;2-Oxocarboxylic acid metabolism;ABC transporters;Other	rp
FAUX	MFCD00027233@16.259-rp	MFCD00027233	146.109	16.259	C11H14	4521397	#N/A	rp
FAUX	MFCD00027233@13.395-rp	MFCD00027233	146.109	13.395	C11H14	4521397	#N/A	rp
FAUX	MFCD00027233@15.505-rp	MFCD00027233	146.109	15.505	C11H14	4521397	#N/A	rp
FAUX	MFCD00027233@8.433-rp	MFCD00027233	146.109	8.433	C11H14	4521397	#N/A	rp
FAUX	MFCD00027233@8.702-rp	MFCD00027233	146.109	8.702	C11H14	4521397	#N/A	rp
FAUX	MFCD00027233@7.93-rp	MFCD00027233	146.109	7.93	C11H14	4521397	#N/A	rp
FAUX	MFCD00027233@13.917-rp	MFCD00027233	146.109	13.917	C11H14	4521397	#N/A	rp
FAUX	146.53947@3.051-rp	#N/A	146.539	3.051	#N/A	#N/A	#N/A	rp
FAUX	146.58697@1.163-rp	#N/A	146.587	1.163	#N/A	#N/A	#N/A	rp
FAUX	146.60504@8.268-rp	#N/A	146.605	8.268	#N/A	#N/A	#N/A	rp
FAUX	146.60531@1.466-rp	#N/A	146.605	1.466	#N/A	#N/A	#N/A	rp
FAUX	146.99684@1.028-rp	#N/A	146.997	1.028	#N/A	#N/A	#N/A	rp
FAUX	Indole-5-6-quinone@6.584-rp	Indole-5-6-quinone	147.032	6.584	C8H5NO2	#N/A	Metabolic pathways;Tyrosine metabolism	rp
FAUX	Indole-5-6-quinone@3.206-rp	Indole-5-6-quinone	147.032	3.206	C8H5NO2	#N/A	Metabolic pathways;Tyrosine metabolism	rp
FAUX	147.05178@6.87-rp	#N/A	147.052	6.87	#N/A	#N/A	#N/A	rp
FAUX	L-Glutamicacid@1.059-rp	L-Glutamicacid	147.053	1.059	C5H9NO4	#N/A	Metabolic pathways;Biosynthesis of secondary metabolites;Microbial metabolism in diverse environments;Biosynthesis of plant secondary metabolites;Biosynthesis of amino acids;2-Oxocarboxylic acid metabolism;ABC transporters;Other	rp
FAUX	D-Glutamate@1.701-rp	D-Glutamate	147.053	1.701	C5H9NO4	#N/A	Metabolic pathways;Biosynthesis of secondary metabolites;Microbial metabolism in diverse environments;Biosynthesis of plant secondary metabolites;Biosynthesis of amino acids;2-Oxocarboxylic acid metabolism;ABC transporters;Other	rp
FAUX	O-Acetylserine@1.272-rp	O-Acetylserine	147.053	1.272	C5H9NO4	#N/A	Metabolic pathways;Biosynthesis of secondary metabolites;Microbial metabolism in diverse environments;Biosynthesis of plant secondary metabolites;Biosynthesis of amino acids;2-Oxocarboxylic acid metabolism;ABC transporters;Other	rp
FAUX	O-Acetylserine@1.397-rp	O-Acetylserine	147.053	1.397	C5H9NO4	#N/A	Metabolic pathways;Biosynthesis of secondary metabolites;Microbial metabolism in diverse environments;Biosynthesis of plant secondary metabolites;Biosynthesis of amino acids;2-Oxocarboxylic acid metabolism;ABC transporters;Other	rp
FAUX	(2S)-2-Amino-4-hydrazino-4-oxobutanoicacid@1.185-rp	(2S)-2-Amino-4-hydrazino-4-oxobutanoicacid	147.065	1.185	C4H9N3O3	88029	#N/A	rp
FAUX	3-Methyloxindole@9.274-rp	3-Methyloxindole	147.068	9.274	C9H9NO	133020	#N/A	rp
FAUX	3-Methyloxindole@2.205-rp	3-Methyloxindole	147.068	2.205	C9H9NO	133020	#N/A	rp
FAUX	3-Methyloxindole@1.691-rp	3-Methyloxindole	147.069	1.691	C9H9NO	133020	#N/A	rp
FAUX	3-Methyloxindole@7.358-rp	3-Methyloxindole	147.069	7.358	C9H9NO	133020	#N/A	rp
FAUX	5-Methoxyindole@7.621-rp	5-Methoxyindole	147.069	7.621	C9H9NO	#N/A	#N/A	rp
FAUX	147.08872@1.125-rp	#N/A	147.089	1.125	#N/A	#N/A	#N/A	rp
FAUX	N-hydroxyisoleucine@1.109-rp	N-hydroxyisoleucine	147.09	1.109	C6H13NO3	#N/A	Biosynthesis of secondary metabolites;Other	rp
FAUX	N-hydroxyisoleucine@1.34-rp	N-hydroxyisoleucine	147.09	1.34	C6H13NO3	#N/A	Biosynthesis of secondary metabolites;Other	rp
FAUX	N-hydroxyisoleucine@3.056-rp	N-hydroxyisoleucine	147.09	3.056	C6H13NO3	#N/A	Biosynthesis of secondary metabolites;Other	rp
FAUX	N-hydroxyisoleucine@1.98-rp	N-hydroxyisoleucine	147.09	1.98	C6H13NO3	#N/A	Biosynthesis of secondary metabolites;Other	rp
FAUX	5-Amino-2-hydrazinopentanoicacid@1.035-rp	5-Amino-2-hydrazinopentanoicacid	147.101	1.035	C5H13N3O2	149435	#N/A	rp
FAUX	2-Aminotetralin@3.788-rp	2-Aminotetralin	147.105	3.788	C10H13N	31912	Biosynthesis of secondary metabolites;Other	rp
FAUX	5-Amino-1,3-heptanediol@1.123-rp	5-Amino-1,3-heptanediol	147.126	1.123	C7H17NO2	4472075	#N/A	rp
FAUX	147.54045@7.627-rp	#N/A	147.54	7.627	#N/A	#N/A	#N/A	rp
FAUX	D-?-Hydroxyglutaricacid@1.41-rp	D-?-Hydroxyglutaricacid	148.037	1.41	C5H8O5	#N/A	Metabolic pathways;Microbial metabolism in diverse environments;Biosynthesis of amino acids;2-Oxocarboxylic acid metabolism;Other	rp
FAUX	D-?-Hydroxyglutaricacid@1.483-rp	D-?-Hydroxyglutaricacid	148.037	1.483	C5H8O5	#N/A	Metabolic pathways;Microbial metabolism in diverse environments;Biosynthesis of amino acids;2-Oxocarboxylic acid metabolism;Other	rp
FAUX	D-?-Hydroxyglutaricacid@1.158-rp	D-?-Hydroxyglutaricacid	148.038	1.158	C5H8O5	#N/A	Metabolic pathways;Microbial metabolism in diverse environments;Biosynthesis of amino acids;2-Oxocarboxylic acid metabolism;Other	rp
FAUX	(R)-2-Hydroxyglutarate@2.789-rp	(R)-2-Hydroxyglutarate	148.038	2.789	C5H8O5	#N/A	Metabolic pathways;Microbial metabolism in diverse environments;Biosynthesis of amino acids;2-Oxocarboxylic acid metabolism;Other	rp
FAUX	Isonicotinoylazide@4.552-rp	Isonicotinoylazide	148.039	4.552	C6H4N4O	9875783	#N/A	rp
FAUX	Isonicotinoylazide@2.799-rp	Isonicotinoylazide	148.039	2.799	C6H4N4O	9875783	#N/A	rp
FAUX	Bis(1-aziridinyl)phosphinicacid@6.585-rp	Bis(1-aziridinyl)phosphinicacid	148.04	6.585	C4H9N2O2P	21377618	#N/A	rp
FAUX	L-Aspartylhydroxamate@1.19-rp	L-Aspartylhydroxamate	148.049	1.19	C4H8N2O4	#N/A	#N/A	rp
FAUX	1-phenylpropane-1-2-dione@9.299-rp	1-phenylpropane-1-2-dione	148.052	9.299	C9H8O2	#N/A	Metabolic pathways;Biosynthesis of secondary metabolites;Microbial metabolism in diverse environments;Degradation of aromatic compounds;Biosynthesis of plant secondary metabolites;Biosynthesis of phenylpropanoids;Phenylpropanoid biosynthesis;Biosynthesis of alkaloids derived from shikimate pathway;Phenylalanine metabolism;Ubiquinone and other terpenoid-quinone biosynthesis;Biosynthesis of various…	rp
FAUX	1-phenylpropane-1-2-dione@12.965-rp	1-phenylpropane-1-2-dione	148.052	12.965	C9H8O2	#N/A	Metabolic pathways;Biosynthesis of secondary metabolites;Microbial metabolism in diverse environments;Degradation of aromatic compounds;Biosynthesis of plant secondary metabolites;Biosynthesis of phenylpropanoids;Phenylpropanoid biosynthesis;Biosynthesis of alkaloids derived from shikimate pathway;Phenylalanine metabolism;Ubiquinone and other terpenoid-quinone biosynthesis;Biosynthesis of various…	rp
FAUX	1-phenylpropane-1-2-dione@1.488-rp	1-phenylpropane-1-2-dione	148.052	1.488	C9H8O2	#N/A	Metabolic pathways;Biosynthesis of secondary metabolites;Microbial metabolism in diverse environments;Degradation of aromatic compounds;Biosynthesis of plant secondary metabolites;Biosynthesis of phenylpropanoids;Phenylpropanoid biosynthesis;Biosynthesis of alkaloids derived from shikimate pathway;Phenylalanine metabolism;Ubiquinone and other terpenoid-quinone biosynthesis;Biosynthesis of various…	rp
FAUX	1-phenylpropane-1-2-dione@8.232-rp	1-phenylpropane-1-2-dione	148.052	8.232	C9H8O2	#N/A	Metabolic pathways;Biosynthesis of secondary metabolites;Microbial metabolism in diverse environments;Degradation of aromatic compounds;Biosynthesis of plant secondary metabolites;Biosynthesis of phenylpropanoids;Phenylpropanoid biosynthesis;Biosynthesis of alkaloids derived from shikimate pathway;Phenylalanine metabolism;Ubiquinone and other terpenoid-quinone biosynthesis;Biosynthesis of various…	rp
FAUX	1-phenylpropane-1-2-dione@10.306-rp	1-phenylpropane-1-2-dione	148.052	10.306	C9H8O2	#N/A	Metabolic pathways;Biosynthesis of secondary metabolites;Microbial metabolism in diverse environments;Degradation of aromatic compounds;Biosynthesis of plant secondary metabolites;Biosynthesis of phenylpropanoids;Phenylpropanoid biosynthesis;Biosynthesis of alkaloids derived from shikimate pathway;Phenylalanine metabolism;Ubiquinone and other terpenoid-quinone biosynthesis;Biosynthesis of various…	rp
FAUX	1-phenylpropane-1-2-dione@9.546-rp	1-phenylpropane-1-2-dione	148.052	9.546	C9H8O2	#N/A	Metabolic pathways;Biosynthesis of secondary metabolites;Microbial metabolism in diverse environments;Degradation of aromatic compounds;Biosynthesis of plant secondary metabolites;Biosynthesis of phenylpropanoids;Phenylpropanoid biosynthesis;Biosynthesis of alkaloids derived from shikimate pathway;Phenylalanine metabolism;Ubiquinone and other terpenoid-quinone biosynthesis;Biosynthesis of various…	rp
FAUX	1-phenylpropane-1-2-dione@13.181-rp	1-phenylpropane-1-2-dione	148.052	13.181	C9H8O2	#N/A	Metabolic pathways;Biosynthesis of secondary metabolites;Microbial metabolism in diverse environments;Degradation of aromatic compounds;Biosynthesis of plant secondary metabolites;Biosynthesis of phenylpropanoids;Phenylpropanoid biosynthesis;Biosynthesis of alkaloids derived from shikimate pathway;Phenylalanine metabolism;Ubiquinone and other terpenoid-quinone biosynthesis;Biosynthesis of various…	rp
FAUX	1-phenylpropane-1-2-dione@5.882-rp	1-phenylpropane-1-2-dione	148.052	5.882	C9H8O2	#N/A	Metabolic pathways;Biosynthesis of secondary metabolites;Microbial metabolism in diverse environments;Degradation of aromatic compounds;Biosynthesis of plant secondary metabolites;Biosynthesis of phenylpropanoids;Phenylpropanoid biosynthesis;Biosynthesis of alkaloids derived from shikimate pathway;Phenylalanine metabolism;Ubiquinone and other terpenoid-quinone biosynthesis;Biosynthesis of various…	rp
FAUX	1-phenylpropane-1-2-dione@12.433-rp	1-phenylpropane-1-2-dione	148.052	12.433	C9H8O2	#N/A	Metabolic pathways;Biosynthesis of secondary metabolites;Microbial metabolism in diverse environments;Degradation of aromatic compounds;Biosynthesis of plant secondary metabolites;Biosynthesis of phenylpropanoids;Phenylpropanoid biosynthesis;Biosynthesis of alkaloids derived from shikimate pathway;Phenylalanine metabolism;Ubiquinone and other terpenoid-quinone biosynthesis;Biosynthesis of various…	rp
FAUX	1-phenylpropane-1-2-dione@1.945-rp	1-phenylpropane-1-2-dione	148.053	1.945	C9H8O2	#N/A	Metabolic pathways;Biosynthesis of secondary metabolites;Microbial metabolism in diverse environments;Degradation of aromatic compounds;Biosynthesis of plant secondary metabolites;Biosynthesis of phenylpropanoids;Phenylpropanoid biosynthesis;Biosynthesis of alkaloids derived from shikimate pathway;Phenylalanine metabolism;Ubiquinone and other terpenoid-quinone biosynthesis;Biosynthesis of various…	rp
FAUX	1-phenylpropane-1-2-dione@7.065-rp	1-phenylpropane-1-2-dione	148.053	7.065	C9H8O2	#N/A	Metabolic pathways;Biosynthesis of secondary metabolites;Microbial metabolism in diverse environments;Degradation of aromatic compounds;Biosynthesis of plant secondary metabolites;Biosynthesis of phenylpropanoids;Phenylpropanoid biosynthesis;Biosynthesis of alkaloids derived from shikimate pathway;Phenylalanine metabolism;Ubiquinone and other terpenoid-quinone biosynthesis;Biosynthesis of various…	rp
FAUX	1-phenylpropane-1-2-dione@8.637-rp	1-phenylpropane-1-2-dione	148.053	8.637	C9H8O2	#N/A	Metabolic pathways;Biosynthesis of secondary metabolites;Microbial metabolism in diverse environments;Degradation of aromatic compounds;Biosynthesis of plant secondary metabolites;Biosynthesis of phenylpropanoids;Phenylpropanoid biosynthesis;Biosynthesis of alkaloids derived from shikimate pathway;Phenylalanine metabolism;Ubiquinone and other terpenoid-quinone biosynthesis;Biosynthesis of various…	rp
FAUX	2-Benzimidazolemethanol@10.029-rp	2-Benzimidazolemethanol	148.064	10.029	C8H8N2O	70929	#N/A	rp
FAUX	H-Met-NH2@7.985-rp	H-Met-NH2	148.067	7.985	C5H12N2OS	129201	#N/A	rp
FAUX	(R)-2-3-Dihydroxy-3-methylpentanoate@1.697-rp	(R)-2-3-Dihydroxy-3-methylpentanoate	148.074	1.697	C6H12O4	#N/A	Metabolic pathways;Biosynthesis of secondary metabolites;Biosynthesis of plant secondary metabolites;Biosynthesis of amino acids;2-Oxocarboxylic acid metabolism;Biosynthesis of plant hormones;Other	rp
FAUX	(R)-2-3-Dihydroxy-3-methylpentanoate@1.823-rp	(R)-2-3-Dihydroxy-3-methylpentanoate	148.074	1.823	C6H12O4	#N/A	Metabolic pathways;Biosynthesis of secondary metabolites;Biosynthesis of plant secondary metabolites;Biosynthesis of amino acids;2-Oxocarboxylic acid metabolism;Biosynthesis of plant hormones;Other	rp
FAUX	(R)-2-3-Dihydroxy-3-methylpentanoate@5.284-rp	(R)-2-3-Dihydroxy-3-methylpentanoate	148.074	5.284	C6H12O4	#N/A	Metabolic pathways;Biosynthesis of secondary metabolites;Biosynthesis of plant secondary metabolites;Biosynthesis of amino acids;2-Oxocarboxylic acid metabolism;Biosynthesis of plant hormones;Other	rp
FAUX	(R)-2-3-Dihydroxy-3-methylpentanoate@1.092-rp	(R)-2-3-Dihydroxy-3-methylpentanoate	148.074	1.092	C6H12O4	#N/A	Metabolic pathways;Biosynthesis of secondary metabolites;Biosynthesis of plant secondary metabolites;Biosynthesis of amino acids;2-Oxocarboxylic acid metabolism;Biosynthesis of plant hormones;Other	rp
FAUX	O-(2-Aminoethyl)-L-serine@1.024-rp	O-(2-Aminoethyl)-L-serine	148.085	1.024	C5H12N2O3	141085	#N/A	rp
FAUX	148.08607@1.033-rp	#N/A	148.086	1.033	#N/A	#N/A	#N/A	rp
FAUX	Cuminaldehyde@14.82-rp	Cuminaldehyde	148.089	14.82	C10H12O	21106431	Metabolic pathways;Microbial metabolism in diverse environments;Degradation of aromatic compounds;Phenylpropanoid biosynthesis;Other	rp
FAUX	Cuminaldehyde@8.296-rp	Cuminaldehyde	148.089	8.296	C10H12O	21106431	Metabolic pathways;Microbial metabolism in diverse environments;Degradation of aromatic compounds;Phenylpropanoid biosynthesis;Other	rp
FAUX	Cuminaldehyde@8.445-rp	Cuminaldehyde	148.089	8.445	C10H12O	21106431	Metabolic pathways;Microbial metabolism in diverse environments;Degradation of aromatic compounds;Phenylpropanoid biosynthesis;Other	rp
FAUX	Cuminaldehyde@10.024-rp	Cuminaldehyde	148.089	10.024	C10H12O	21106431	Metabolic pathways;Microbial metabolism in diverse environments;Degradation of aromatic compounds;Phenylpropanoid biosynthesis;Other	rp
FAUX	Cuminaldehyde@7.958-rp	Cuminaldehyde	148.089	7.958	C10H12O	21106431	Metabolic pathways;Microbial metabolism in diverse environments;Degradation of aromatic compounds;Phenylpropanoid biosynthesis;Other	rp
FAUX	n-Amylbenzene@16.258-rp	n-Amylbenzene	148.125	16.258	C11H16	10404	#N/A	rp
FAUX	n-Amylbenzene@12.802-rp	n-Amylbenzene	148.125	12.802	C11H16	10404	#N/A	rp
FAUX	n-Amylbenzene@13.389-rp	n-Amylbenzene	148.125	13.389	C11H16	10404	#N/A	rp
FAUX	Cumene,2,4-dimethyl-@15.068-rp	Cumene,2,4-dimethyl-	148.125	15.068	C11H16	19607	#N/A	rp
FAUX	Cumene,2,4-dimethyl-@8.417-rp	Cumene,2,4-dimethyl-	148.125	8.417	C11H16	19607	#N/A	rp
FAUX	n-Amylbenzene@17.77-rp	n-Amylbenzene	148.125	17.77	C11H16	10404	#N/A	rp
FAUX	n-Amylbenzene@18.565-rp	n-Amylbenzene	148.125	18.565	C11H16	10404	#N/A	rp
FAUX	148.12618@13.383-rp	#N/A	148.126	13.383	#N/A	#N/A	#N/A	rp
FAUX	148.52644@6.28-rp	#N/A	148.526	6.28	#N/A	#N/A	#N/A	rp
FAUX	148.57178@1.156-rp	#N/A	148.572	1.156	#N/A	#N/A	#N/A	rp
FAUX	148.5901@0.888-rp	#N/A	148.59	0.888	#N/A	#N/A	#N/A	rp
FAUX	(S)-4-Hydroxymandelonitrile@6.108-rp	(S)-4-Hydroxymandelonitrile	149.048	6.108	C8H7NO2	#N/A	Metabolic pathways;Biosynthesis of secondary metabolites;Tyrosine metabolism;Tryptophan metabolism;Other	rp
FAUX	(S)-4-Hydroxymandelonitrile@6.588-rp	(S)-4-Hydroxymandelonitrile	149.048	6.588	C8H7NO2	#N/A	Metabolic pathways;Biosynthesis of secondary metabolites;Tyrosine metabolism;Tryptophan metabolism;Other	rp
FAUX	(S)-4-Hydroxymandelonitrile@5.64-rp	(S)-4-Hydroxymandelonitrile	149.048	5.64	C8H7NO2	#N/A	Metabolic pathways;Biosynthesis of secondary metabolites;Tyrosine metabolism;Tryptophan metabolism;Other	rp
FAUX	(S)-4-Hydroxymandelonitrile@1.475-rp	(S)-4-Hydroxymandelonitrile	149.048	1.475	C8H7NO2	#N/A	Metabolic pathways;Biosynthesis of secondary metabolites;Tyrosine metabolism;Tryptophan metabolism;Other	rp
FAUX	D-Methionine@3.393-rp	D-Methionine	149.051	3.393	C5H11NO2S	76512	Metabolic pathways;Biosynthesis of secondary metabolites;Biosynthesis of plant secondary metabolites;Biosynthesis of amino acids;2-Oxocarboxylic acid metabolism;ABC transporters;Biosynthesis of plant hormones;Other	rp
FAUX	D-Methionine@4.55-rp	D-Methionine	149.051	4.55	C5H11NO2S	76512	Metabolic pathways;Biosynthesis of secondary metabolites;Biosynthesis of plant secondary metabolites;Biosynthesis of amino acids;2-Oxocarboxylic acid metabolism;ABC transporters;Biosynthesis of plant hormones;Other	rp
FAUX	D-Methionine@1.254-rp	D-Methionine	149.051	1.254	C5H11NO2S	76512	Metabolic pathways;Biosynthesis of secondary metabolites;Biosynthesis of plant secondary metabolites;Biosynthesis of amino acids;2-Oxocarboxylic acid metabolism;ABC transporters;Biosynthesis of plant hormones;Other	rp
FAUX	D-Methionine@2.911-rp	D-Methionine	149.051	2.911	C5H11NO2S	76512	Metabolic pathways;Biosynthesis of secondary metabolites;Biosynthesis of plant secondary metabolites;Biosynthesis of amino acids;2-Oxocarboxylic acid metabolism;ABC transporters;Biosynthesis of plant hormones;Other	rp
FAUX	5-Fluoro-3-methylindole@1.062-rp	5-Fluoro-3-methylindole	149.064	1.062	C9H8FN	19085763	#N/A	rp
FAUX	N,N-dihydroxyvaline@1.061-rp	N,N-dihydroxyvaline	149.069	1.061	C5H11NO4	#N/A	Metabolic pathways;Biosynthesis of secondary metabolites;Other	rp
FAUX	1-Methyladenine@1.274-rp	1-Methyladenine	149.07	1.274	C6H7N5	71157	#N/A	rp
FAUX	1-Methyladenine@1.463-rp	1-Methyladenine	149.07	1.463	C6H7N5	71157	#N/A	rp
FAUX	1-Methyladenine@7.396-rp	1-Methyladenine	149.07	7.396	C6H7N5	71157	#N/A	rp
FAUX	149.08225@1.052-rp	#N/A	149.082	1.052	C3H12N5P	#N/A	#N/A	rp
FAUX	D-Cathinone@1.467-rp	D-Cathinone	149.084	1.467	C9H11NO	#N/A	Metabolic pathways;2-Oxocarboxylic acid metabolism;Biosynthesis of alkaloids derived from shikimate pathway;Phenylalanine metabolism;Other	rp
FAUX	D-Cathinone@5.094-rp	D-Cathinone	149.084	5.094	C9H11NO	#N/A	Metabolic pathways;2-Oxocarboxylic acid metabolism;Biosynthesis of alkaloids derived from shikimate pathway;Phenylalanine metabolism;Other	rp
FAUX	D-Cathinone@6.195-rp	D-Cathinone	149.084	6.195	C9H11NO	#N/A	Metabolic pathways;2-Oxocarboxylic acid metabolism;Biosynthesis of alkaloids derived from shikimate pathway;Phenylalanine metabolism;Other	rp
FAUX	149.5741@1.047-rp	#N/A	149.574	1.047	#N/A	#N/A	#N/A	rp
FAUX	149.59794@1.719-rp	#N/A	149.598	1.719	#N/A	#N/A	#N/A	rp
FAUX	2-carboxybenzaldehyde@9.458-rp	2-carboxybenzaldehyde	150.032	9.458	C8H6O3	#N/A	Metabolic pathways;Microbial metabolism in diverse environments;Phenylalanine metabolism;Aminobenzoate degradation;Other	rp
FAUX	2-carboxybenzaldehyde@9.075-rp	2-carboxybenzaldehyde	150.032	9.075	C8H6O3	#N/A	Metabolic pathways;Microbial metabolism in diverse environments;Phenylalanine metabolism;Aminobenzoate degradation;Other	rp
FAUX	2-carboxybenzaldehyde@1.874-rp	2-carboxybenzaldehyde	150.032	1.874	C8H6O3	#N/A	Metabolic pathways;Microbial metabolism in diverse environments;Phenylalanine metabolism;Aminobenzoate degradation;Other	rp
FAUX	2-carboxybenzaldehyde@7.233-rp	2-carboxybenzaldehyde	150.032	7.233	C8H6O3	#N/A	Metabolic pathways;Microbial metabolism in diverse environments;Phenylalanine metabolism;Aminobenzoate degradation;Other	rp
FAUX	2-carboxybenzaldehyde@8.638-rp	2-carboxybenzaldehyde	150.032	8.638	C8H6O3	#N/A	Metabolic pathways;Microbial metabolism in diverse environments;Phenylalanine metabolism;Aminobenzoate degradation;Other	rp
FAUX	2-carboxybenzaldehyde@5.237-rp	2-carboxybenzaldehyde	150.032	5.237	C8H6O3	#N/A	Metabolic pathways;Microbial metabolism in diverse environments;Phenylalanine metabolism;Aminobenzoate degradation;Other	rp
FAUX	2-carboxybenzaldehyde@6.225-rp	2-carboxybenzaldehyde	150.032	6.225	C8H6O3	#N/A	Metabolic pathways;Microbial metabolism in diverse environments;Phenylalanine metabolism;Aminobenzoate degradation;Other	rp
FAUX	2-carboxybenzaldehyde@3.463-rp	2-carboxybenzaldehyde	150.032	3.463	C8H6O3	#N/A	Metabolic pathways;Microbial metabolism in diverse environments;Phenylalanine metabolism;Aminobenzoate degradation;Other	rp
FAUX	2-carboxybenzaldehyde@6.439-rp	2-carboxybenzaldehyde	150.032	6.439	C8H6O3	#N/A	Metabolic pathways;Microbial metabolism in diverse environments;Phenylalanine metabolism;Aminobenzoate degradation;Other	rp
FAUX	2-Hydroxy-4-methylthiobutanoicacid@2.927-rp	2-Hydroxy-4-methylthiobutanoicacid	150.035	2.927	C5H10O3S	#N/A	#N/A	rp
FAUX	D-(-)-Lyxose@1.131-rp	D-(-)-Lyxose	150.053	1.131	C5H10O5	#N/A	Metabolic pathways;ABC transporters;Other	rp
FAUX	1-methylhypoxanthine@1.116-rp	1-methylhypoxanthine	150.054	1.116	C6H6N4O	63930	#N/A	rp
FAUX	1-methylhypoxanthine@4.307-rp	1-methylhypoxanthine	150.054	4.307	C6H6N4O	63930	#N/A	rp
FAUX	1-methylhypoxanthine@3.697-rp	1-methylhypoxanthine	150.054	3.697	C6H6N4O	63930	#N/A	rp
FAUX	1-methylhypoxanthine@4.007-rp	1-methylhypoxanthine	150.054	4.007	C6H6N4O	63930	#N/A	rp
FAUX	4-Coumarylalcohol@17.942-rp	4-Coumarylalcohol	150.068	17.942	C9H10O2	#N/A	Metabolic pathways;Biosynthesis of secondary metabolites;Microbial metabolism in diverse environments;Degradation of aromatic compounds;Biosynthesis of phenylpropanoids;Phenylpropanoid biosynthesis;Biosynthesis of alkaloids derived from shikimate pathway;Phenylalanine metabolism;Other	rp
FAUX	4-Coumarylalcohol@14.951-rp	4-Coumarylalcohol	150.068	14.951	C9H10O2	#N/A	Metabolic pathways;Biosynthesis of secondary metabolites;Microbial metabolism in diverse environments;Degradation of aromatic compounds;Biosynthesis of phenylpropanoids;Phenylpropanoid biosynthesis;Biosynthesis of alkaloids derived from shikimate pathway;Phenylalanine metabolism;Other	rp
FAUX	4-Coumarylalcohol@12.223-rp	4-Coumarylalcohol	150.068	12.223	C9H10O2	#N/A	Metabolic pathways;Biosynthesis of secondary metabolites;Microbial metabolism in diverse environments;Degradation of aromatic compounds;Biosynthesis of phenylpropanoids;Phenylpropanoid biosynthesis;Biosynthesis of alkaloids derived from shikimate pathway;Phenylalanine metabolism;Other	rp
FAUX	4-Coumarylalcohol@8.143-rp	4-Coumarylalcohol	150.068	8.143	C9H10O2	#N/A	Metabolic pathways;Biosynthesis of secondary metabolites;Microbial metabolism in diverse environments;Degradation of aromatic compounds;Biosynthesis of phenylpropanoids;Phenylpropanoid biosynthesis;Biosynthesis of alkaloids derived from shikimate pathway;Phenylalanine metabolism;Other	rp
FAUX	Hydrocinnamicacid@10.569-rp	Hydrocinnamicacid	150.068	10.569	C9H10O2	#N/A	Metabolic pathways;Biosynthesis of secondary metabolites;Microbial metabolism in diverse environments;Degradation of aromatic compounds;Biosynthesis of phenylpropanoids;Phenylpropanoid biosynthesis;Biosynthesis of alkaloids derived from shikimate pathway;Phenylalanine metabolism;Other	rp
FAUX	4-Coumarylalcohol@9.311-rp	4-Coumarylalcohol	150.068	9.311	C9H10O2	#N/A	Metabolic pathways;Biosynthesis of secondary metabolites;Microbial metabolism in diverse environments;Degradation of aromatic compounds;Biosynthesis of phenylpropanoids;Phenylpropanoid biosynthesis;Biosynthesis of alkaloids derived from shikimate pathway;Phenylalanine metabolism;Other	rp
FAUX	6-Amino-9-methyl-7H-purin-9-ium@2.066-rp	6-Amino-9-methyl-7H-purin-9-ium	150.077	2.066	C6H8N5	20120120	#N/A	rp
FAUX	6-Methylnicotinamide@4.356-rp	6-Methylnicotinamide	150.079	4.356	C8H10N2O	86975	#N/A	rp
FAUX	6-Methylnicotinamide@1.046-rp	6-Methylnicotinamide	150.08	1.046	C8H10N2O	86975	#N/A	rp
FAUX	Triethyleneglycol@1.063-rp	Triethyleneglycol	150.089	1.063	C6H14O4	13835895	#N/A	rp
FAUX	1,4-Dideoxyhexitol@1.28-rp	1,4-Dideoxyhexitol	150.089	1.28	C6H14O4	10661855	#N/A	rp
FAUX	Triethyleneglycol@1.062-rp	Triethyleneglycol	150.09	1.062	C6H14O4	13835895	#N/A	rp
FAUX	(-)-Isopiperitenone@17.78-rp	(-)-Isopiperitenone	150.104	17.78	C10H14O	#N/A	Metabolic pathways;Biosynthesis of secondary metabolites;Microbial metabolism in diverse environments;Degradation of aromatic compounds;Other	rp
FAUX	(-)-Isopiperitenone@7.937-rp	(-)-Isopiperitenone	150.104	7.937	C10H14O	#N/A	Metabolic pathways;Biosynthesis of secondary metabolites;Microbial metabolism in diverse environments;Degradation of aromatic compounds;Other	rp
FAUX	(-)-Isopiperitenone@8.701-rp	(-)-Isopiperitenone	150.104	8.701	C10H14O	#N/A	Metabolic pathways;Biosynthesis of secondary metabolites;Microbial metabolism in diverse environments;Degradation of aromatic compounds;Other	rp
FAUX	(-)-Isopiperitenone@9.687-rp	(-)-Isopiperitenone	150.105	9.687	C10H14O	#N/A	Metabolic pathways;Biosynthesis of secondary metabolites;Microbial metabolism in diverse environments;Degradation of aromatic compounds;Other	rp
FAUX	(-)-Isopiperitenone@7.801-rp	(-)-Isopiperitenone	150.105	7.801	C10H14O	#N/A	Metabolic pathways;Biosynthesis of secondary metabolites;Microbial metabolism in diverse environments;Degradation of aromatic compounds;Other	rp
FAUX	4-tert-butylphenol@9.279-rp	4-tert-butylphenol	150.105	9.279	C10H14O	#N/A	Metabolic pathways;Biosynthesis of secondary metabolites;Microbial metabolism in diverse environments;Degradation of aromatic compounds;Other	rp
FAUX	4-tert-butylphenol@9.484-rp	4-tert-butylphenol	150.105	9.484	C10H14O	#N/A	Metabolic pathways;Biosynthesis of secondary metabolites;Microbial metabolism in diverse environments;Degradation of aromatic compounds;Other	rp
FAUX	150.58972@5.754-rp	#N/A	150.59	5.754	#N/A	#N/A	#N/A	rp
FAUX	3-Bromo-N-methyl-1-propanamine@6.585-rp	3-Bromo-N-methyl-1-propanamine	150.999	6.585	C4H10BrN	9280679	#N/A	rp
FAUX	151.02493@1.018-rp	#N/A	151.025	1.018	C3HN7O	#N/A	#N/A	rp
FAUX	6-Imino-5-oxocyclohexa-1-3-dienecarboxylate@6.945-rp	6-Imino-5-oxocyclohexa-1-3-dienecarboxylate	151.027	6.945	C7H5NO3	#N/A	#N/A	rp
FAUX	6-Imino-5-oxocyclohexa-1-3-dienecarboxylate@5.956-rp	6-Imino-5-oxocyclohexa-1-3-dienecarboxylate	151.027	5.956	C7H5NO3	#N/A	#N/A	rp
FAUX	151.02896@8.399-rp	#N/A	151.029	8.399	#N/A	#N/A	#N/A	rp
FAUX	151.02918@6.286-rp	#N/A	151.029	6.286	#N/A	#N/A	#N/A	rp
FAUX	3-(Methylsulfinyl)-L-alanine@1.118-rp	3-(Methylsulfinyl)-L-alanine	151.031	1.118	C4H9NO3S	158377	#N/A	rp
FAUX	3-(Methylsulfinyl)-L-alanine@1.429-rp	3-(Methylsulfinyl)-L-alanine	151.031	1.429	C4H9NO3S	158377	#N/A	rp
FAUX	7H-Pyrrolo[2,3-d]pyrimidine-2,4-diol@6.219-rp	7H-Pyrrolo[2,3-d]pyrimidine-2,4-diol	151.038	6.219	C6H5N3O2	9993869	#N/A	rp
FAUX	mandelate@6.276-rp	mandelate	151.04	6.276	C8H7O3	3064854	#N/A	rp
FAUX	Guanine@5.212-rp	Guanine	151.049	5.212	C5H5N5O	744	Metabolic pathways;Other	rp
FAUX	Guanine@3.684-rp	Guanine	151.05	3.684	C5H5N5O	744	Metabolic pathways;Other	rp
FAUX	Guanine@2.669-rp	Guanine	151.05	2.669	C5H5N5O	744	Metabolic pathways;Other	rp
FAUX	Guanine@3.983-rp	Guanine	151.05	3.983	C5H5N5O	744	Metabolic pathways;Other	rp
FAUX	Guanine@1.995-rp_1631	Guanine	151.05	1.995	C5H5N5O	744	Metabolic pathways;Other	rp
FAUX	Guanine@6.815-rp	Guanine	151.05	6.815	C5H5N5O	744	Metabolic pathways;Other	rp
FAUX	151.05049@2.661-rp	#N/A	151.05	2.661	C3H10N3O2P	#N/A	#N/A	rp
FAUX	151.06203@1.13-rp	#N/A	151.062	1.13	#N/A	#N/A	#N/A	rp
FAUX	(E)-4-hydroxyphenylacetaldehydeoxime@1.084-rp	(E)-4-hydroxyphenylacetaldehydeoxime	151.063	1.084	C8H9NO2	#N/A	Metabolic pathways;Biosynthesis of secondary metabolites;Microbial metabolism in diverse environments;2-Oxocarboxylic acid metabolism;Biosynthesis of alkaloids derived from shikimate pathway;Aminobenzoate degradation;Bile secretion;Other	rp
FAUX	(E)-4-hydroxyphenylacetaldehydeoxime@4.143-rp	(E)-4-hydroxyphenylacetaldehydeoxime	151.063	4.143	C8H9NO2	#N/A	Metabolic pathways;Biosynthesis of secondary metabolites;Microbial metabolism in diverse environments;2-Oxocarboxylic acid metabolism;Biosynthesis of alkaloids derived from shikimate pathway;Aminobenzoate degradation;Bile secretion;Other	rp
FAUX	(E)-4-hydroxyphenylacetaldehydeoxime@5.249-rp	(E)-4-hydroxyphenylacetaldehydeoxime	151.064	5.249	C8H9NO2	#N/A	Metabolic pathways;Biosynthesis of secondary metabolites;Microbial metabolism in diverse environments;2-Oxocarboxylic acid metabolism;Biosynthesis of alkaloids derived from shikimate pathway;Aminobenzoate degradation;Bile secretion;Other	rp
FAUX	(E)-4-hydroxyphenylacetaldehydeoxime@1.479-rp	(E)-4-hydroxyphenylacetaldehydeoxime	151.064	1.479	C8H9NO2	#N/A	Metabolic pathways;Biosynthesis of secondary metabolites;Microbial metabolism in diverse environments;2-Oxocarboxylic acid metabolism;Biosynthesis of alkaloids derived from shikimate pathway;Aminobenzoate degradation;Bile secretion;Other	rp
FAUX	(E)-4-hydroxyphenylacetaldehydeoxime@6.007-rp	(E)-4-hydroxyphenylacetaldehydeoxime	151.064	6.007	C8H9NO2	#N/A	Metabolic pathways;Biosynthesis of secondary metabolites;Microbial metabolism in diverse environments;2-Oxocarboxylic acid metabolism;Biosynthesis of alkaloids derived from shikimate pathway;Aminobenzoate degradation;Bile secretion;Other	rp
FAUX	2-Aminobenzhydrazide@1.122-rp	2-Aminobenzhydrazide	151.074	1.122	C7H9N3O	85476	#N/A	rp
FAUX	2-(4-Fluorophenyl)cyclopropanamine@1.467-rp	2-(4-Fluorophenyl)cyclopropanamine	151.08	1.467	C9H10FN	11209853	#N/A	rp
FAUX	[4-(Aminomethyl)phenyl]boronicacid@1.472-rp	[4-(Aminomethyl)phenyl]boronicacid	151.081	1.472	C7H10BNO2	2016064	#N/A	rp
FAUX	5-Amino-5-deoxy-D-arabinitol@1.039-rp	5-Amino-5-deoxy-D-arabinitol	151.085	1.039	C5H13NO4	8361401	#N/A	rp
FAUX	N-Methylphenylethanolamine@1.689-rp	N-Methylphenylethanolamine	151.1	1.689	C9H13NO	#N/A	Metabolic pathways;Biosynthesis of alkaloids derived from shikimate pathway;Tyrosine metabolism;Phenylalanine metabolism	rp
FAUX	151.57161@1.057-rp	#N/A	151.572	1.057	#N/A	#N/A	#N/A	rp
FAUX	151.57688@1.06-rp	#N/A	151.577	1.06	#N/A	#N/A	#N/A	rp
FAUX	3-Sulfinylpyruvate@1.074-rp	3-Sulfinylpyruvate	151.978	1.074	C3H4O5S	#N/A	Metabolic pathways;Other	rp
FAUX	152.00718@7.621-rp	#N/A	152.007	7.621	C4H11P3	#N/A	#N/A	rp
FAUX	3-(Methylsulfonyl)propanoicacid@1.422-rp	3-(Methylsulfonyl)propanoicacid	152.015	1.422	C4H8O4S	107401	#N/A	rp
FAUX	152.01861@6.584-rp	#N/A	152.019	6.584	CH4N4O5	#N/A	#N/A	rp
FAUX	152.03342@4.103-rp	#N/A	152.033	4.103	C5H12OS2	#N/A	Metabolic pathways;Biosynthesis of secondary metabolites;Microbial metabolism in diverse environments;Biosynthesis of plant secondary metabolites;Other	rp
FAUX	Xanthine@3.293-rp	Xanthine	152.033	3.293	C5H4N4O2	1151	Metabolic pathways;Biosynthesis of secondary metabolites;Microbial metabolism in diverse environments;Biosynthesis of plant secondary metabolites;Other	rp
FAUX	Xanthine@2.126-rp	Xanthine	152.034	2.126	C5H4N4O2	1151	Metabolic pathways;Biosynthesis of secondary metabolites;Microbial metabolism in diverse environments;Biosynthesis of plant secondary metabolites;Other	rp
FAUX	Xanthine@2.441-rp	Xanthine	152.034	2.441	C5H4N4O2	1151	Metabolic pathways;Biosynthesis of secondary metabolites;Microbial metabolism in diverse environments;Biosynthesis of plant secondary metabolites;Other	rp
FAUX	152.04399@4.713-rp	#N/A	152.044	4.713	C3H8N2O5	#N/A	#N/A	rp
FAUX	2'-4'-Dihydroxyacetophenone@8.517-rp	2'-4'-Dihydroxyacetophenone	152.047	8.517	C8H8O3	#N/A	Metabolic pathways;Biosynthesis of secondary metabolites;Microbial metabolism in diverse environments;Degradation of aromatic compounds;Biosynthesis of phenylpropanoids;Biosynthesis of alkaloids derived from shikimate pathway;Tyrosine metabolism;Phenylalanine metabolism;Biosynthesis of various secondary metabolites - part 2;Aminobenzoate degradation;Other	rp
FAUX	2'-4'-Dihydroxyacetophenone@12.913-rp	2'-4'-Dihydroxyacetophenone	152.048	12.913	C8H8O3	#N/A	Metabolic pathways;Biosynthesis of secondary metabolites;Microbial metabolism in diverse environments;Degradation of aromatic compounds;Biosynthesis of phenylpropanoids;Biosynthesis of alkaloids derived from shikimate pathway;Tyrosine metabolism;Phenylalanine metabolism;Biosynthesis of various secondary metabolites - part 2;Aminobenzoate degradation;Other	rp
FAUX	2'-4'-Dihydroxyacetophenone@6.803-rp	2'-4'-Dihydroxyacetophenone	152.048	6.803	C8H8O3	#N/A	Metabolic pathways;Biosynthesis of secondary metabolites;Microbial metabolism in diverse environments;Degradation of aromatic compounds;Biosynthesis of phenylpropanoids;Biosynthesis of alkaloids derived from shikimate pathway;Tyrosine metabolism;Phenylalanine metabolism;Biosynthesis of various secondary metabolites - part 2;Aminobenzoate degradation;Other	rp
FAUX	2'-4'-Dihydroxyacetophenone@3.382-rp	2'-4'-Dihydroxyacetophenone	152.048	3.382	C8H8O3	#N/A	Metabolic pathways;Biosynthesis of secondary metabolites;Microbial metabolism in diverse environments;Degradation of aromatic compounds;Biosynthesis of phenylpropanoids;Biosynthesis of alkaloids derived from shikimate pathway;Tyrosine metabolism;Phenylalanine metabolism;Biosynthesis of various secondary metabolites - part 2;Aminobenzoate degradation;Other	rp
FAUX	Vanillin@6.283-rp	Vanillin	152.048	6.283	C8H8O3	13860434	Metabolic pathways;Biosynthesis of secondary metabolites;Microbial metabolism in diverse environments;Degradation of aromatic compounds;Biosynthesis of phenylpropanoids;Biosynthesis of alkaloids derived from shikimate pathway;Tyrosine metabolism;Phenylalanine metabolism;Biosynthesis of various secondary metabolites - part 2;Aminobenzoate degradation;Other	rp
FAUX	DL-Mandelicacid@6.028-rp	DL-Mandelicacid	152.048	6.028	C8H8O3	#N/A	Metabolic pathways;Biosynthesis of secondary metabolites;Microbial metabolism in diverse environments;Degradation of aromatic compounds;Biosynthesis of phenylpropanoids;Biosynthesis of alkaloids derived from shikimate pathway;Tyrosine metabolism;Phenylalanine metabolism;Biosynthesis of various secondary metabolites - part 2;Aminobenzoate degradation;Other	rp
FAUX	2'-4'-Dihydroxyacetophenone@8.209-rp	2'-4'-Dihydroxyacetophenone	152.048	8.209	C8H8O3	#N/A	Metabolic pathways;Biosynthesis of secondary metabolites;Microbial metabolism in diverse environments;Degradation of aromatic compounds;Biosynthesis of phenylpropanoids;Biosynthesis of alkaloids derived from shikimate pathway;Tyrosine metabolism;Phenylalanine metabolism;Biosynthesis of various secondary metabolites - part 2;Aminobenzoate degradation;Other	rp
FAUX	Vanillin@7.848-rp	Vanillin	152.048	7.848	C8H8O3	13860434	Metabolic pathways;Biosynthesis of secondary metabolites;Microbial metabolism in diverse environments;Degradation of aromatic compounds;Biosynthesis of phenylpropanoids;Biosynthesis of alkaloids derived from shikimate pathway;Tyrosine metabolism;Phenylalanine metabolism;Biosynthesis of various secondary metabolites - part 2;Aminobenzoate degradation;Other	rp
FAUX	2'-4'-Dihydroxyacetophenone@5.35-rp	2'-4'-Dihydroxyacetophenone	152.048	5.35	C8H8O3	#N/A	Metabolic pathways;Biosynthesis of secondary metabolites;Microbial metabolism in diverse environments;Degradation of aromatic compounds;Biosynthesis of phenylpropanoids;Biosynthesis of alkaloids derived from shikimate pathway;Tyrosine metabolism;Phenylalanine metabolism;Biosynthesis of various secondary metabolites - part 2;Aminobenzoate degradation;Other	rp
FAUX	N1-Methyl-2-pyridone-5-carboxamide@1.034-rp	N1-Methyl-2-pyridone-5-carboxamide	152.059	1.034	C7H8N2O2	#N/A	Metabolic pathways;Microbial metabolism in diverse environments;Other	rp
FAUX	N1-Methyl-2-pyridone-5-carboxamide@2.241-rp	N1-Methyl-2-pyridone-5-carboxamide	152.059	2.241	C7H8N2O2	#N/A	Metabolic pathways;Microbial metabolism in diverse environments;Other	rp
FAUX	N1-Methyl-2-pyridone-5-carboxamide@1.812-rp	N1-Methyl-2-pyridone-5-carboxamide	152.059	1.812	C7H8N2O2	#N/A	Metabolic pathways;Microbial metabolism in diverse environments;Other	rp
FAUX	N1-Methyl-2-pyridone-5-carboxamide@4.446-rp	N1-Methyl-2-pyridone-5-carboxamide	152.059	4.446	C7H8N2O2	#N/A	Metabolic pathways;Microbial metabolism in diverse environments;Other	rp
FAUX	N1-Methyl-2-pyridone-5-carboxamide@3.599-rp	N1-Methyl-2-pyridone-5-carboxamide	152.059	3.599	C7H8N2O2	#N/A	Metabolic pathways;Microbial metabolism in diverse environments;Other	rp
FAUX	D-Arabitol@1.072-rp	D-Arabitol	152.069	1.072	C5H12O5	#N/A	Metabolic pathways;ABC transporters;Other	rp
FAUX	2-Hydrazinonicotinamide@1.112-rp	2-Hydrazinonicotinamide	152.07	1.112	C6H8N4O	10788489	#N/A	rp
FAUX	4-ethylguaiacol@9.016-rp	4-ethylguaiacol	152.084	9.016	C9H12O2	#N/A	#N/A	rp
FAUX	4-ethylguaiacol@7.164-rp	4-ethylguaiacol	152.084	7.164	C9H12O2	#N/A	#N/A	rp
FAUX	(-)-trans-Carveol@15.056-rp	(-)-trans-Carveol	152.12	15.056	C10H16O	#N/A	Biosynthesis of secondary metabolites;Degradation of aromatic compounds;Other	rp
FAUX	(-)-trans-Carveol@18.57-rp	(-)-trans-Carveol	152.12	18.57	C10H16O	#N/A	Biosynthesis of secondary metabolites;Degradation of aromatic compounds;Other	rp
FAUX	(-)-trans-Carveol@17.781-rp	(-)-trans-Carveol	152.12	17.781	C10H16O	#N/A	Biosynthesis of secondary metabolites;Degradation of aromatic compounds;Other	rp
FAUX	(-)-trans-Carveol@7.611-rp	(-)-trans-Carveol	152.12	7.611	C10H16O	#N/A	Biosynthesis of secondary metabolites;Degradation of aromatic compounds;Other	rp
FAUX	(-)-trans-Carveol@9.594-rp	(-)-trans-Carveol	152.12	9.594	C10H16O	#N/A	Biosynthesis of secondary metabolites;Degradation of aromatic compounds;Other	rp
FAUX	1,8-Diazabicyclo[5.4.0]undec-7-ene@7.363-rp	1,8-Diazabicyclo[5.4.0]undec-7-ene	152.131	7.363	C9H16N2	73246	#N/A	rp
FAUX	152.58703@2.305-rp	#N/A	152.587	2.305	#N/A	#N/A	#N/A	rp
FAUX	3-Sulfinoalanine;Cysteinesulfinicacid@1.193-rp	3-Sulfinoalanine;Cysteinesulfinicacid	153.01	1.193	C3H7NO4S	#N/A	Metabolic pathways;Other	rp
FAUX	3-Sulfinoalanine;Cysteinesulfinicacid@1.424-rp	3-Sulfinoalanine;Cysteinesulfinicacid	153.01	1.424	C3H7NO4S	#N/A	Metabolic pathways;Other	rp
FAUX	153.01718@2.442-rp	#N/A	153.017	2.442	C5H3N3O3	#N/A	#N/A	rp
FAUX	FOSAMINE@9.537-rp	FOSAMINE	153.019	9.537	C3H8NO4P	30725	#N/A	rp
FAUX	FOSAMINE@7.487-rp	FOSAMINE	153.019	7.487	C3H8NO4P	30725	#N/A	rp
FAUX	FOSAMINE@6.861-rp	FOSAMINE	153.019	6.861	C3H8NO4P	30725	#N/A	rp
FAUX	153.02636@7.621-rp	#N/A	153.026	7.621	#N/A	#N/A	#N/A	rp
FAUX	153.02643@7.357-rp	#N/A	153.026	7.357	#N/A	#N/A	#N/A	rp
FAUX	1-Carbapen-2-em-3-carboxylicacid@1.235-rp	1-Carbapen-2-em-3-carboxylicacid	153.043	1.235	C7H7NO3	#N/A	Metabolic pathways;Biosynthesis of secondary metabolites;Microbial metabolism in diverse environments;Tryptophan metabolism;Aminobenzoate degradation;Other	rp
FAUX	1-Carbapen-2-em-3-carboxylicacid@4.447-rp	1-Carbapen-2-em-3-carboxylicacid	153.043	4.447	C7H7NO3	#N/A	Metabolic pathways;Biosynthesis of secondary metabolites;Microbial metabolism in diverse environments;Tryptophan metabolism;Aminobenzoate degradation;Other	rp
FAUX	1-Carbapen-2-em-3-carboxylicacid@1.89-rp	1-Carbapen-2-em-3-carboxylicacid	153.043	1.89	C7H7NO3	#N/A	Metabolic pathways;Biosynthesis of secondary metabolites;Microbial metabolism in diverse environments;Tryptophan metabolism;Aminobenzoate degradation;Other	rp
FAUX	1-Carbapen-2-em-3-carboxylicacid@3.613-rp	1-Carbapen-2-em-3-carboxylicacid	153.043	3.613	C7H7NO3	#N/A	Metabolic pathways;Biosynthesis of secondary metabolites;Microbial metabolism in diverse environments;Tryptophan metabolism;Aminobenzoate degradation;Other	rp
FAUX	1-Carbapen-2-em-3-carboxylicacid@5.163-rp	1-Carbapen-2-em-3-carboxylicacid	153.043	5.163	C7H7NO3	#N/A	Metabolic pathways;Biosynthesis of secondary metabolites;Microbial metabolism in diverse environments;Tryptophan metabolism;Aminobenzoate degradation;Other	rp
FAUX	1-Carbapen-2-em-3-carboxylicacid@2.256-rp	1-Carbapen-2-em-3-carboxylicacid	153.043	2.256	C7H7NO3	#N/A	Metabolic pathways;Biosynthesis of secondary metabolites;Microbial metabolism in diverse environments;Tryptophan metabolism;Aminobenzoate degradation;Other	rp
FAUX	1-Carbapen-2-em-3-carboxylicacid@1.462-rp	1-Carbapen-2-em-3-carboxylicacid	153.043	1.462	C7H7NO3	#N/A	Metabolic pathways;Biosynthesis of secondary metabolites;Microbial metabolism in diverse environments;Tryptophan metabolism;Aminobenzoate degradation;Other	rp
FAUX	153.04427@1.256-rp	#N/A	153.044	1.256	#N/A	#N/A	#N/A	rp
FAUX	bis(tetrazolyl)amine@6.077-rp	bis(tetrazolyl)amine	153.052	6.077	C2H3N9	3176683	#N/A	rp
FAUX	ST2975000@1.566-rp	ST2975000	153.054	1.566	C6H7N3O2	4286892	#N/A	rp
FAUX	Vanillylamine@1.482-rp	Vanillylamine	153.078	1.482	C8H11NO2	#N/A	Metabolic pathways;Biosynthesis of secondary metabolites;Biosynthesis of plant secondary metabolites;Biosynthesis of alkaloids derived from shikimate pathway;Tyrosine metabolism;Biosynthesis of various secondary metabolites - part 2;Bile secretion;Other	rp
FAUX	Vanillylamine@1.091-rp	Vanillylamine	153.079	1.091	C8H11NO2	#N/A	Metabolic pathways;Biosynthesis of secondary metabolites;Biosynthesis of plant secondary metabolites;Biosynthesis of alkaloids derived from shikimate pathway;Tyrosine metabolism;Biosynthesis of various secondary metabolites - part 2;Bile secretion;Other	rp
FAUX	Vanillylamine@1.257-rp	Vanillylamine	153.079	1.257	C8H11NO2	#N/A	Metabolic pathways;Biosynthesis of secondary metabolites;Biosynthesis of plant secondary metabolites;Biosynthesis of alkaloids derived from shikimate pathway;Tyrosine metabolism;Biosynthesis of various secondary metabolites - part 2;Bile secretion;Other	rp
FAUX	1-(4-Hydroxyphenyl)-2-aminoethanol@1.478-rp	1-(4-Hydroxyphenyl)-2-aminoethanol	153.079	1.478	C8H11NO2	#N/A	Metabolic pathways;Biosynthesis of secondary metabolites;Biosynthesis of plant secondary metabolites;Biosynthesis of alkaloids derived from shikimate pathway;Tyrosine metabolism;Biosynthesis of various secondary metabolites - part 2;Bile secretion;Other	rp
FAUX	153.08876@1.48-rp	#N/A	153.089	1.48	#N/A	#N/A	#N/A	rp
FAUX	153.08878@1.219-rp	#N/A	153.089	1.219	#N/A	#N/A	#N/A	rp
FAUX	4-(beta-Acetylaminoethyl)imidazole@1.227-rp	4-(beta-Acetylaminoethyl)imidazole	153.09	1.227	C7H11N3O	#N/A	Microbial metabolism in diverse environments;Other	rp
FAUX	4-(beta-Acetylaminoethyl)imidazole@1.479-rp	4-(beta-Acetylaminoethyl)imidazole	153.09	1.479	C7H11N3O	#N/A	Microbial metabolism in diverse environments;Other	rp
FAUX	4-(beta-Acetylaminoethyl)imidazole@5.61-rp	4-(beta-Acetylaminoethyl)imidazole	153.09	5.61	C7H11N3O	#N/A	Microbial metabolism in diverse environments;Other	rp
FAUX	Bicyclo[2.2.2]octane-1-carboxylate@1.471-rp	Bicyclo[2.2.2]octane-1-carboxylate	153.092	1.471	C9H13O2	35014270	#N/A	rp
FAUX	153.89137@1.019-rp	#N/A	153.891	1.019	#N/A	#N/A	#N/A	rp
FAUX	153.94423@0.993-rp	#N/A	153.944	0.993	#N/A	#N/A	#N/A	rp
FAUX	153.97018@0.913-rp	#N/A	153.97	0.913	CH4N2O3P2	#N/A	#N/A	rp
FAUX	3-Sulfopropanoicacid@1.112-rp	3-Sulfopropanoicacid	153.994	1.112	C3H6O5S	362571	#N/A	rp
FAUX	Glycerol1-2-cyclicphosphate@1.101-rp	Glycerol1-2-cyclicphosphate	154.003	1.101	C3H7O5P	#N/A	Metabolic pathways;Other	rp
FAUX	Gentisicacid@5.017-rp	Gentisicacid	154.027	5.017	C7H6O4	#N/A	Metabolic pathways;Biosynthesis of secondary metabolites;Microbial metabolism in diverse environments;Degradation of aromatic compounds;Biosynthesis of phenylpropanoids;Tyrosine metabolism;Aminobenzoate degradation;Other	rp
FAUX	2-4-Dihydroxybenzoicacid@6.311-rp	2-4-Dihydroxybenzoicacid	154.027	6.311	C7H6O4	#N/A	Metabolic pathways;Biosynthesis of secondary metabolites;Microbial metabolism in diverse environments;Degradation of aromatic compounds;Biosynthesis of phenylpropanoids;Tyrosine metabolism;Aminobenzoate degradation;Other	rp
FAUX	2-4-Dihydroxybenzoicacid@7.212-rp	2-4-Dihydroxybenzoicacid	154.027	7.212	C7H6O4	#N/A	Metabolic pathways;Biosynthesis of secondary metabolites;Microbial metabolism in diverse environments;Degradation of aromatic compounds;Biosynthesis of phenylpropanoids;Tyrosine metabolism;Aminobenzoate degradation;Other	rp
FAUX	Gentisicacid@4.264-rp	Gentisicacid	154.027	4.264	C7H6O4	#N/A	Metabolic pathways;Biosynthesis of secondary metabolites;Microbial metabolism in diverse environments;Degradation of aromatic compounds;Biosynthesis of phenylpropanoids;Tyrosine metabolism;Aminobenzoate degradation;Other	rp
FAUX	Gentisicacid@4.605-rp	Gentisicacid	154.027	4.605	C7H6O4	#N/A	Metabolic pathways;Biosynthesis of secondary metabolites;Microbial metabolism in diverse environments;Degradation of aromatic compounds;Biosynthesis of phenylpropanoids;Tyrosine metabolism;Aminobenzoate degradation;Other	rp
FAUX	2-4-Dihydroxybenzoicacid@6.028-rp	2-4-Dihydroxybenzoicacid	154.027	6.028	C7H6O4	#N/A	Metabolic pathways;Biosynthesis of secondary metabolites;Microbial metabolism in diverse environments;Degradation of aromatic compounds;Biosynthesis of phenylpropanoids;Tyrosine metabolism;Aminobenzoate degradation;Other	rp
FAUX	2-4-Dihydroxybenzoicacid@8.962-rp	2-4-Dihydroxybenzoicacid	154.027	8.962	C7H6O4	#N/A	Metabolic pathways;Biosynthesis of secondary metabolites;Microbial metabolism in diverse environments;Degradation of aromatic compounds;Biosynthesis of phenylpropanoids;Tyrosine metabolism;Aminobenzoate degradation;Other	rp
FAUX	Diethylsulfate@1.426-rp	Diethylsulfate	154.03	1.426	C4H10O4S	5931	#N/A	rp
FAUX	Diethylsulfate@1.24-rp	Diethylsulfate	154.03	1.24	C4H10O4S	5931	#N/A	rp
FAUX	154.03548@1.029-rp	#N/A	154.035	1.029	C2H2N8O	#N/A	#N/A	rp
FAUX	Imidazol-5-yl-pyruvate@5.277-rp	Imidazol-5-yl-pyruvate	154.038	5.277	C6H6N2O3	#N/A	Metabolic pathways;Other	rp
FAUX	Imidazol-5-yl-pyruvate@3.862-rp	Imidazol-5-yl-pyruvate	154.038	3.862	C6H6N2O3	#N/A	Metabolic pathways;Other	rp
FAUX	Imidazol-5-yl-pyruvate@1.268-rp	Imidazol-5-yl-pyruvate	154.038	1.268	C6H6N2O3	#N/A	Metabolic pathways;Other	rp
FAUX	Imidazol-5-yl-pyruvate@1.469-rp	Imidazol-5-yl-pyruvate	154.038	1.469	C6H6N2O3	#N/A	Metabolic pathways;Other	rp
FAUX	Hydroxytyrosol@2.208-rp	Hydroxytyrosol	154.063	2.208	C8H10O3	74680	Microbial metabolism in diverse environments;Aminobenzoate degradation	rp
FAUX	Hydroxytyrosol@2.36-rp	Hydroxytyrosol	154.063	2.36	C8H10O3	74680	Microbial metabolism in diverse environments;Aminobenzoate degradation	rp
FAUX	Hydroxytyrosol@2.657-rp	Hydroxytyrosol	154.063	2.657	C8H10O3	74680	Microbial metabolism in diverse environments;Aminobenzoate degradation	rp
FAUX	154.0643@9.472-rp	#N/A	154.064	9.472	#N/A	#N/A	#N/A	rp
FAUX	154.07188@0.974-rp	#N/A	154.072	0.974	C3H6N8	#N/A	#N/A	rp
FAUX	N,N?-Methylenebisacrylamide@1.672-rp	N,N?-Methylenebisacrylamide	154.074	1.672	C7H10N2O2	7750	#N/A	rp
FAUX	N,N?-Methylenebisacrylamide@1.816-rp	N,N?-Methylenebisacrylamide	154.074	1.816	C7H10N2O2	7750	#N/A	rp
FAUX	N,N?-Methylenebisacrylamide@2.681-rp	N,N?-Methylenebisacrylamide	154.074	2.681	C7H10N2O2	7750	#N/A	rp
FAUX	Trigonelline@1.27-rp	Trigonelline	154.074	1.27	C7H7NO2	5369	#N/A	rp
FAUX	6-Methylnicotinamide@1.1-rp	6-Methylnicotinamide	154.074	1.1	C7H8N2O	86975	#N/A	rp
FAUX	Trigonelline@1.466-rp	Trigonelline	154.074	1.466	C7H7NO2	5369	#N/A	rp
FAUX	N,N?-Methylenebisacrylamide@2.127-rp	N,N?-Methylenebisacrylamide	154.075	2.127	C7H10N2O2	7750	#N/A	rp
FAUX	RI2735000@10.349-rp	RI2735000	154.099	10.349	C9H14O2	7801	#N/A	rp
FAUX	Milameline@8.16-rp	Milameline	154.111	8.16	C8H14N2O	7845468	#N/A	rp
FAUX	Milameline@1.479-rp	Milameline	154.111	1.479	C8H14N2O	7845468	#N/A	rp
FAUX	Milameline@1.022-rp	Milameline	154.111	1.022	C8H14N2O	7845468	#N/A	rp
FAUX	(-)-Borneol@11.239-rp	(-)-Borneol	154.136	11.239	C10H18O	#N/A	Metabolic pathways;Biosynthesis of secondary metabolites;Degradation of aromatic compounds;Biosynthesis of plant secondary metabolites;Other	rp
FAUX	154.57153@1.05-rp	#N/A	154.572	1.05	#N/A	#N/A	#N/A	rp
FAUX	2-Amino-3-hydroxy-1-propanesulfonicacid@1.054-rp	2-Amino-3-hydroxy-1-propanesulfonicacid	155.025	1.054	C3H9NO4S	390536	#N/A	rp
FAUX	Carbapenam-3-carboxylicacid@1.239-rp	Carbapenam-3-carboxylicacid	155.058	1.239	C7H9NO3	#N/A	Metabolic pathways;Biosynthesis of secondary metabolites;Other	rp
FAUX	Carbapenam-3-carboxylicacid@1.558-rp	Carbapenam-3-carboxylicacid	155.058	1.558	C7H9NO3	#N/A	Metabolic pathways;Biosynthesis of secondary metabolites;Other	rp
FAUX	Carbapenam-3-carboxylicacid@2.086-rp	Carbapenam-3-carboxylicacid	155.058	2.086	C7H9NO3	#N/A	Metabolic pathways;Biosynthesis of secondary metabolites;Other	rp
FAUX	3-(Pyrazol-1-yl)-L-alanine@5.569-rp	3-(Pyrazol-1-yl)-L-alanine	155.07	5.569	C6H9N3O2	#N/A	Metabolic pathways;Biosynthesis of secondary metabolites;Biosynthesis of plant secondary metabolites;Biosynthesis of amino acids;ABC transporters;Other	rp
FAUX	2-Isopropyl-4,5-dimethyl-1,3-thiazole@1.686-rp	2-Isopropyl-4,5-dimethyl-1,3-thiazole	155.076	1.686	C8H13NS	37256	#N/A	rp
FAUX	Retronecine@1.476-rp	Retronecine	155.095	1.476	C8H13NO2	10180	Biosynthesis of secondary metabolites;Other	rp
FAUX	Retronecine@7.105-rp	Retronecine	155.095	7.105	C8H13NO2	10180	Biosynthesis of secondary metabolites;Other	rp
FAUX	Retronecine@1.179-rp	Retronecine	155.095	1.179	C8H13NO2	10180	Biosynthesis of secondary metabolites;Other	rp
FAUX	1,4,8-Triazaspiro[4.5]decan-2-one@1.569-rp	1,4,8-Triazaspiro[4.5]decan-2-one	155.106	1.569	C7H13N3O	16150731	#N/A	rp
FAUX	N-methylpelletierine@2.003-rp	N-methylpelletierine	155.131	2.003	C9H17NO	#N/A	Biosynthesis of secondary metabolites;Other	rp
FAUX	1-ethyl-3-[3-(dimethylamino)propyl]carbodiimide@1.015-rp	1-ethyl-3-[3-(dimethylamino)propyl]carbodiimide	155.143	1.015	C8H17N3	15119	#N/A	rp
FAUX	155.52902@7.621-rp	#N/A	155.529	7.621	#N/A	#N/A	#N/A	rp
FAUX	155.53794@6.585-rp	#N/A	155.538	6.585	#N/A	#N/A	#N/A	rp
FAUX	155.97363@1.595-rp	#N/A	155.974	1.595	C2H6O4P2	#N/A	#N/A	rp
FAUX	155.9749@1.299-rp	#N/A	155.975	1.299	C3H2N4P2	#N/A	#N/A	rp
FAUX	3-sulfopropanediol@1.428-rp	3-sulfopropanediol	156.009	1.428	C3H8O5S	100440	#N/A	rp
FAUX	3-sulfopropanediol@1.095-rp	3-sulfopropanediol	156.009	1.095	C3H8O5S	100440	#N/A	rp
FAUX	Oroticacid(vitaminB13)@1.486-rp	Oroticacid(vitaminB13)	156.017	1.486	C5H4N2O4	#N/A	Metabolic pathways;Other	rp
FAUX	156.02735@0.9-rp	#N/A	156.027	0.9	C3H8O7	#N/A	#N/A	rp
FAUX	156.03875@0.89-rp	#N/A	156.039	0.89	C2H8N2O6	#N/A	#N/A	rp
FAUX	156.04002@0.969-rp	#N/A	156.04	0.969	C3H4N6O2	#N/A	#N/A	rp
FAUX	2-3-Dihydro-2-3-dihydroxybenzoate@1.163-rp	2-3-Dihydro-2-3-dihydroxybenzoate	156.042	1.163	C7H8O4	#N/A	Metabolic pathways;Biosynthesis of secondary metabolites;Microbial metabolism in diverse environments;Degradation of aromatic compounds;Other	rp
FAUX	2-3-Dihydro-2-3-dihydroxybenzoate@2.63-rp	2-3-Dihydro-2-3-dihydroxybenzoate	156.043	2.63	C7H8O4	#N/A	Metabolic pathways;Biosynthesis of secondary metabolites;Microbial metabolism in diverse environments;Degradation of aromatic compounds;Other	rp
FAUX	4-Imidazolone-5-propanoate@1.086-rp	4-Imidazolone-5-propanoate	156.054	1.086	C6H8N2O3	#N/A	Metabolic pathways;Other	rp
FAUX	4-Imidazolone-5-propanoate@2.367-rp	4-Imidazolone-5-propanoate	156.054	2.367	C6H8N2O3	#N/A	Metabolic pathways;Other	rp
FAUX	4-Imidazolone-5-propanoate@1.249-rp	4-Imidazolone-5-propanoate	156.054	1.249	C6H8N2O3	#N/A	Metabolic pathways;Other	rp
FAUX	4-Imidazolone-5-propanoate@1.843-rp	4-Imidazolone-5-propanoate	156.054	1.843	C6H8N2O3	#N/A	Metabolic pathways;Other	rp
FAUX	4-Imidazolone-5-propanoate@1.326-rp	4-Imidazolone-5-propanoate	156.054	1.326	C6H8N2O3	#N/A	Metabolic pathways;Other	rp
FAUX	MFCD00023117@1.077-rp	MFCD00023117	156.072	1.077	C7H12N2S	836365	#N/A	rp
FAUX	2-Carbethoxycyclopentanone@8.512-rp	2-Carbethoxycyclopentanone	156.079	8.512	C8H12O3	62352	#N/A	rp
FAUX	2-Carbethoxycyclopentanone@1.741-rp	2-Carbethoxycyclopentanone	156.079	1.741	C8H12O3	62352	#N/A	rp
FAUX	2-Carbethoxycyclopentanone@2.555-rp	2-Carbethoxycyclopentanone	156.079	2.555	C8H12O3	62352	#N/A	rp
FAUX	2-Carbethoxycyclopentanone@3.665-rp	2-Carbethoxycyclopentanone	156.079	3.665	C8H12O3	62352	#N/A	rp
FAUX	156.08872@1.075-rp	#N/A	156.089	1.075	#N/A	#N/A	#N/A	rp
FAUX	1-Acetyl-L-prolinamide@2.688-rp	1-Acetyl-L-prolinamide	156.09	2.688	C7H12N2O2	77017	#N/A	rp
FAUX	1-Acetyl-L-prolinamide@1.034-rp	1-Acetyl-L-prolinamide	156.09	1.034	C7H12N2O2	77017	#N/A	rp
FAUX	1-Acetyl-L-prolinamide@1.176-rp	1-Acetyl-L-prolinamide	156.09	1.176	C7H12N2O2	77017	#N/A	rp
FAUX	1-Acetyl-L-prolinamide@1.817-rp	1-Acetyl-L-prolinamide	156.09	1.817	C7H12N2O2	77017	#N/A	rp
FAUX	2,6-DIMETHYLNAPHTHALENE@13.382-rp	2,6-DIMETHYLNAPHTHALENE	156.094	13.382	C12H12	10909	#N/A	rp
FAUX	2,6-DIMETHYLNAPHTHALENE@8.16-rp	2,6-DIMETHYLNAPHTHALENE	156.094	8.16	C12H12	10909	#N/A	rp
FAUX	3-tert-Butyladipicacid@10.83-rp	3-tert-Butyladipicacid	156.115	10.83	C10H18O4	#N/A	Other	rp
FAUX	Nonane-4-6-dione@18.566-rp	Nonane-4-6-dione	156.115	18.566	C9H16O2	#N/A	Other	rp
FAUX	Nonane-4-6-dione@10.309-rp	Nonane-4-6-dione	156.115	10.309	C9H16O2	#N/A	Other	rp
FAUX	N,N-dimethylaminopropylacrylamide@1.277-rp	N,N-dimethylaminopropylacrylamide	156.126	1.277	C8H16N2O	69861	#N/A	rp
FAUX	157.02275@0.886-rp	#N/A	157.023	0.886	C2H7NO7	#N/A	#N/A	rp
FAUX	2-Aminomuconate@1.269-rp	2-Aminomuconate	157.038	1.269	C6H7NO4	#N/A	Metabolic pathways;Tryptophan metabolism	rp
FAUX	2-Aminomuconate@1.483-rp	2-Aminomuconate	157.038	1.483	C6H7NO4	#N/A	Metabolic pathways;Tryptophan metabolism	rp
FAUX	1-nitrosonaphthalene@1.467-rp	1-nitrosonaphthalene	157.053	1.467	C10H7NO	#N/A	Other	rp
FAUX	1-nitrosonaphthalene@1.617-rp	1-nitrosonaphthalene	157.053	1.617	C10H7NO	#N/A	Other	rp
FAUX	DD5650000@2.049-rp	DD5650000	157.063	2.049	C9H7N3	19265	#N/A	rp
FAUX	DD5650000@1.502-rp	DD5650000	157.064	1.502	C9H7N3	19265	#N/A	rp
FAUX	3-Methylcrotonylglycine@1.921-rp	3-Methylcrotonylglycine	157.074	1.921	C7H11NO3	#N/A	#N/A	rp
FAUX	3-Methylcrotonylglycine@3.274-rp	3-Methylcrotonylglycine	157.074	3.274	C7H11NO3	#N/A	#N/A	rp
FAUX	3-Methylcrotonylglycine@1.692-rp	3-Methylcrotonylglycine	157.074	1.692	C7H11NO3	#N/A	#N/A	rp
FAUX	3-Methylcrotonylglycine@1.151-rp	3-Methylcrotonylglycine	157.074	1.151	C7H11NO3	#N/A	#N/A	rp
FAUX	3-Methylcrotonylglycine@2.688-rp	3-Methylcrotonylglycine	157.074	2.688	C7H11NO3	#N/A	#N/A	rp
FAUX	3-Methylcrotonylglycine@2.946-rp	3-Methylcrotonylglycine	157.074	2.946	C7H11NO3	#N/A	#N/A	rp
FAUX	DL-Arginine@1.057-rp	DL-Arginine	157.085	1.057	C6H14N4O2	227	#N/A	rp
FAUX	DL-Arginine@1.472-rp	DL-Arginine	157.085	1.472	C6H14N4O2	227	#N/A	rp
FAUX	AMIDINOPROLINE@1.907-rp	AMIDINOPROLINE	157.085	1.907	C6H11N3O2	9818706	#N/A	rp
FAUX	1-Naphthylmethylamine@5.78-rp	1-Naphthylmethylamine	157.089	5.78	C11H11N	8052	#N/A	rp
FAUX	(4,4,5,5-Tetramethyl-3-oxido-4,5-dihydro-1H-imidazol-1-yl)oxidanyl@1.261-rp	(4,4,5,5-Tetramethyl-3-oxido-4,5-dihydro-1H-imidazol-1-yl)oxidanyl	157.098	1.261	C7H13N2O2	451080	#N/A	rp
FAUX	(4,4,5,5-Tetramethyl-3-oxido-4,5-dihydro-1H-imidazol-1-yl)oxidanyl@4.775-rp	(4,4,5,5-Tetramethyl-3-oxido-4,5-dihydro-1H-imidazol-1-yl)oxidanyl	157.098	4.775	C7H13N2O2	451080	#N/A	rp
FAUX	(4,4,5,5-Tetramethyl-3-oxido-4,5-dihydro-1H-imidazol-1-yl)oxidanyl@1.04-rp	(4,4,5,5-Tetramethyl-3-oxido-4,5-dihydro-1H-imidazol-1-yl)oxidanyl	157.098	1.04	C7H13N2O2	451080	#N/A	rp
FAUX	(4,4,5,5-Tetramethyl-3-oxido-4,5-dihydro-1H-imidazol-1-yl)oxidanyl@6.456-rp	(4,4,5,5-Tetramethyl-3-oxido-4,5-dihydro-1H-imidazol-1-yl)oxidanyl	157.098	6.456	C7H13N2O2	451080	#N/A	rp
FAUX	tranexamicacid@1.513-rp	tranexamicacid	157.11	1.513	C8H15NO2	10482000	#N/A	rp
FAUX	tranexamicacid@1.258-rp	tranexamicacid	157.11	1.258	C8H15NO2	10482000	#N/A	rp
FAUX	tranexamicacid@1.717-rp	tranexamicacid	157.11	1.717	C8H15NO2	10482000	#N/A	rp
FAUX	157.50446@1.428-rp	#N/A	157.504	1.428	#N/A	#N/A	#N/A	rp
FAUX	157.51353@1.591-rp	#N/A	157.514	1.591	#N/A	#N/A	#N/A	rp
FAUX	157.51476@1.593-rp	#N/A	157.515	1.593	#N/A	#N/A	#N/A	rp
FAUX	157.57716@1.16-rp	#N/A	157.577	1.16	#N/A	#N/A	#N/A	rp
FAUX	157.57933@1.472-rp	#N/A	157.579	1.472	#N/A	#N/A	#N/A	rp
FAUX	157.91469@0.999-rp	#N/A	157.915	0.999	#N/A	#N/A	#N/A	rp
FAUX	157.9983@0.978-rp	#N/A	157.998	0.978	C2H7O6P	#N/A	#N/A	rp
FAUX	158.0067@0.868-rp	#N/A	158.007	0.868	C2H6O8	#N/A	#N/A	rp
FAUX	Benzenepentol@2.365-rp	Benzenepentol	158.021	2.365	C6H6O5	5415746	Metabolic pathways;Microbial metabolism in diverse environments;Degradation of aromatic compounds;Tryptophan metabolism;Aminobenzoate degradation;Other	rp
FAUX	2-hydroxymuconicacid@1.536-rp	2-hydroxymuconicacid	158.022	1.536	C6H6O5	#N/A	Metabolic pathways;Microbial metabolism in diverse environments;Degradation of aromatic compounds;Tryptophan metabolism;Aminobenzoate degradation;Other	rp
FAUX	158.02271@1.499-rp	#N/A	158.023	1.499	C7H2N4O	#N/A	#N/A	rp
FAUX	Dihydrooroticacid@1.259-rp	Dihydrooroticacid	158.033	1.259	C5H6N2O4	#N/A	Metabolic pathways;Other	rp
FAUX	1,2-naphthoquinone@7.683-rp	1,2-naphthoquinone	158.037	7.683	C10H6O2	#N/A	Other	rp
FAUX	158.04305@0.896-rp	#N/A	158.043	0.896	#N/A	#N/A	Metabolic pathways;Microbial metabolism in diverse environments;Other	rp
FAUX	(R)(-)-Allantoin@1.143-rp	(R)(-)-Allantoin	158.044	1.143	C4H6N4O3	#N/A	Metabolic pathways;Microbial metabolism in diverse environments;Other	rp
FAUX	158.0475@3.055-rp	#N/A	158.048	3.055	C3H7N6P	#N/A	#N/A	rp
FAUX	158.0529@4.714-rp	#N/A	158.053	4.714	#N/A	#N/A	#N/A	rp
FAUX	(1S-4S)-4-Hydroxy-3-oxocyclohexane-1-carboxylate@4.794-rp	(1S-4S)-4-Hydroxy-3-oxocyclohexane-1-carboxylate	158.058	4.794	C7H10O4	#N/A	Biosynthesis of secondary metabolites;2-Oxocarboxylic acid metabolism;Other	rp
FAUX	(1S-4S)-4-Hydroxy-3-oxocyclohexane-1-carboxylate@1.839-rp	(1S-4S)-4-Hydroxy-3-oxocyclohexane-1-carboxylate	158.058	1.839	C7H10O4	#N/A	Biosynthesis of secondary metabolites;2-Oxocarboxylic acid metabolism;Other	rp
FAUX	(1S-4S)-4-Hydroxy-3-oxocyclohexane-1-carboxylate@6.265-rp	(1S-4S)-4-Hydroxy-3-oxocyclohexane-1-carboxylate	158.058	6.265	C7H10O4	#N/A	Biosynthesis of secondary metabolites;2-Oxocarboxylic acid metabolism;Other	rp
FAUX	158.06374@1.077-rp	#N/A	158.064	1.077	#N/A	#N/A	#N/A	rp
FAUX	4-Methylene-L-glutamine@1.07-rp	4-Methylene-L-glutamine	158.069	1.07	C6H10N2O3	388518	Metabolic pathways;Microbial metabolism in diverse environments;Other	rp
FAUX	4-Methylene-L-glutamine@2.099-rp	4-Methylene-L-glutamine	158.069	2.099	C6H10N2O3	388518	Metabolic pathways;Microbial metabolism in diverse environments;Other	rp
FAUX	Methylimidazoleaceticacid@1.283-rp	Methylimidazoleaceticacid	158.069	1.283	C6H8N2O2	#N/A	Metabolic pathways;Microbial metabolism in diverse environments;Other	rp
FAUX	4-Methylene-L-glutamine@1.476-rp	4-Methylene-L-glutamine	158.07	1.476	C6H10N2O3	388518	Metabolic pathways;Microbial metabolism in diverse environments;Other	rp
FAUX	S-Isopropylthiosenecioate@1.081-rp	S-Isopropylthiosenecioate	158.077	1.081	C8H14OS	106035	#N/A	rp
FAUX	1,8-Diaminonaphthalene@9.011-rp	1,8-Diaminonaphthalene	158.084	9.011	C10H10N2	61381	#N/A	rp
FAUX	2-(Butylsulfanyl)-4,5-dihydro-1H-imidazole@2.001-rp	2-(Butylsulfanyl)-4,5-dihydro-1H-imidazole	158.087	2.001	C7H14N2S	386505	#N/A	rp
FAUX	2-(Butylsulfanyl)-4,5-dihydro-1H-imidazole@1.044-rp	2-(Butylsulfanyl)-4,5-dihydro-1H-imidazole	158.087	1.044	C7H14N2S	386505	#N/A	rp
FAUX	Ethyl3-oxohexanoate@5.789-rp	Ethyl3-oxohexanoate	158.095	5.789	C8H14O3	#N/A	Other	rp
FAUX	TL1378000@1.204-rp	TL1378000	158.106	1.204	C7H14N2O2	8124	#N/A	rp
FAUX	TL1378000@1.129-rp	TL1378000	158.106	1.129	C7H14N2O2	8124	#N/A	rp
FAUX	GW6600000@13.915-rp	GW6600000	158.109	13.915	C12H14	12501	#N/A	rp
FAUX	GW6600000@13.382-rp	GW6600000	158.109	13.382	C12H14	12501	#N/A	rp
FAUX	GW6600000@7.792-rp	GW6600000	158.109	7.792	C12H14	12501	#N/A	rp
FAUX	GW6600000@9.136-rp	GW6600000	158.109	9.136	C12H14	12501	#N/A	rp
FAUX	GW6600000@8.414-rp	GW6600000	158.109	8.414	C12H14	12501	#N/A	rp
FAUX	158.49403@1.422-rp	#N/A	158.494	1.422	#N/A	#N/A	#N/A	rp
FAUX	158.59814@1.266-rp	#N/A	158.598	1.266	#N/A	#N/A	#N/A	rp
FAUX	1-(1,3-Thiazol-2-yl)thiourea@0.896-rp	1-(1,3-Thiazol-2-yl)thiourea	158.993	0.896	C4H5N3S2	2051459	#N/A	rp
FAUX	P3SA@2.551-rp	P3SA	158.999	2.551	C5H5NO3S	62675	#N/A	rp
FAUX	158.99925@2.055-rp	#N/A	158.999	2.055	C7H2N3P	#N/A	#N/A	rp
FAUX	P3SA@1.185-rp	P3SA	158.999	1.185	C5H5NO3S	62675	#N/A	rp
FAUX	Citiolone@13.524-rp	Citiolone	159.035	13.524	C6H9NO2S	13864	#N/A	rp
FAUX	Citiolone@3.624-rp	Citiolone	159.035	3.624	C6H9NO2S	13864	#N/A	rp
FAUX	S-2-Propyn-1-yl-L-cysteine@4.713-rp	S-2-Propyn-1-yl-L-cysteine	159.035	4.713	C6H9NO2S	18501933	#N/A	rp
FAUX	S-2-Propyn-1-yl-L-cysteine@9.127-rp	S-2-Propyn-1-yl-L-cysteine	159.035	9.127	C6H9NO2S	18501933	#N/A	rp
FAUX	S-2-Propyn-1-yl-L-cysteine@9.902-rp	S-2-Propyn-1-yl-L-cysteine	159.035	9.902	C6H9NO2S	18501933	#N/A	rp
FAUX	S-2-Propyn-1-yl-L-cysteine@10.608-rp	S-2-Propyn-1-yl-L-cysteine	159.035	10.608	C6H9NO2S	18501933	#N/A	rp
FAUX	S-2-Propyn-1-yl-L-cysteine@11.692-rp	S-2-Propyn-1-yl-L-cysteine	159.035	11.692	C6H9NO2S	18501933	#N/A	rp
FAUX	Citiolone@8.607-rp	Citiolone	159.035	8.607	C6H9NO2S	13864	#N/A	rp
FAUX	Citiolone@6.998-rp	Citiolone	159.035	6.998	C6H9NO2S	13864	#N/A	rp
FAUX	Citiolone@12.33-rp	Citiolone	159.035	12.33	C6H9NO2S	13864	#N/A	rp
FAUX	Citiolone@1.468-rp	Citiolone	159.036	1.468	C6H9NO2S	13864	#N/A	rp
FAUX	159.03816@0.864-rp	#N/A	159.038	0.864	#N/A	#N/A	#N/A	rp
FAUX	4-Methylene-L-glutamate@1.117-rp	4-Methylene-L-glutamate	159.053	1.117	C6H9NO4	#N/A	Other	rp
FAUX	4-Methylene-L-glutamate@1.452-rp	4-Methylene-L-glutamate	159.053	1.452	C6H9NO4	#N/A	Other	rp
FAUX	Aminoadipate@1.193-rp	Aminoadipate	159.054	1.193	C6H9NO4	10661856	Other	rp
FAUX	6-Carboxyhexanoate@1.133-rp	6-Carboxyhexanoate	159.066	1.133	C7H11O4	16731790	#N/A	rp
FAUX	159.06656@1.14-rp	#N/A	159.067	1.14	C4H10N5P	#N/A	#N/A	rp
FAUX	3-Methyl-quinolin-2-ol@3.124-rp	3-Methyl-quinolin-2-ol	159.068	3.124	C10H9NO	#N/A	Metabolic pathways;Biosynthesis of secondary metabolites;Tryptophan metabolism;Biosynthesis of various secondary metabolites - part 2;Other	rp
FAUX	6-Methoxyquinoline@1.929-rp	6-Methoxyquinoline	159.069	1.929	C10H9NO	14170	Metabolic pathways;Biosynthesis of secondary metabolites;Tryptophan metabolism;Biosynthesis of various secondary metabolites - part 2;Other	rp
FAUX	Indole-3-lacticacid@8.398-rp	Indole-3-lacticacid	159.069	8.398	C11H11NO3	#N/A	Metabolic pathways;Biosynthesis of secondary metabolites;Tryptophan metabolism;Biosynthesis of various secondary metabolites - part 2;Other	rp
FAUX	[6-(Methylsulfanyl)hexylidyne]azaneoxide@1.477-rp	[6-(Methylsulfanyl)hexylidyne]azaneoxide	159.071	1.477	C7H13NOS	24822834	#N/A	rp
FAUX	159.07259@1.477-rp	#N/A	159.073	1.477	#N/A	#N/A	#N/A	rp
FAUX	159.07712@1.036-rp	#N/A	159.077	1.036	#N/A	#N/A	#N/A	rp
FAUX	Valerylglycine@2.053-rp	Valerylglycine	159.09	2.053	C7H13NO3	#N/A	Metabolic pathways;Other	rp
FAUX	N-Acetylvaline@3.537-rp	N-Acetylvaline	159.09	3.537	C7H13NO3	198159	Metabolic pathways;Other	rp
FAUX	Valerylglycine@1.131-rp	Valerylglycine	159.09	1.131	C7H13NO3	#N/A	Metabolic pathways;Other	rp
FAUX	N-Acetylvaline@4.05-rp	N-Acetylvaline	159.09	4.05	C7H13NO3	198159	Metabolic pathways;Other	rp
FAUX	Valerylglycine@5.954-rp	Valerylglycine	159.09	5.954	C7H13NO3	#N/A	Metabolic pathways;Other	rp
FAUX	Valerylglycine@6.248-rp	Valerylglycine	159.09	6.248	C7H13NO3	#N/A	Metabolic pathways;Other	rp
FAUX	N-Acetyl-DL-norvaline@3.267-rp	N-Acetyl-DL-norvaline	159.09	3.267	C7H13NO3	#N/A	Metabolic pathways;Other	rp
FAUX	3-Dehydrocarnitine@2.25-rp	3-Dehydrocarnitine	159.09	2.25	C7H13NO3	#N/A	Metabolic pathways;Other	rp
FAUX	delta-Guanidinovalericacid@1.485-rp	delta-Guanidinovalericacid	159.101	1.485	C6H13N3O2	#N/A	#N/A	rp
FAUX	(2S)-2-Hydroxyoctanoate@1.472-rp	(2S)-2-Hydroxyoctanoate	159.102	1.472	C8H15O3	30791654	#N/A	rp
FAUX	159.12505@1.473-rp	#N/A	159.125	1.473	#N/A	#N/A	#N/A	rp
FAUX	Acetyl-?-methylcholine@1.233-rp	Acetyl-?-methylcholine	159.126	1.233	C8H17NO2	#N/A	#N/A	rp
FAUX	N-(6-Hydroxyhexyl)acetamide@1.808-rp	N-(6-Hydroxyhexyl)acetamide	159.126	1.808	C8H17NO2	13914142	#N/A	rp
FAUX	Acetyl-?-methylcholine@1.519-rp	Acetyl-?-methylcholine	159.126	1.519	C8H17NO2	#N/A	#N/A	rp
FAUX	159.9833@1.314-rp	#N/A	159.983	1.314	C7HN2OP	#N/A	#N/A	rp
FAUX	5-chlorotrihydroxybenzene@0.883-rp	5-chlorotrihydroxybenzene	159.992	0.883	C6H5ClO3	#N/A	Metabolic pathways;Microbial metabolism in diverse environments;Other	rp
FAUX	160.00502@6.583-rp	#N/A	160.005	6.583	C3H4N4O2S	#N/A	#N/A	rp
FAUX	8-Quinolinethiolate@0.892-rp	8-Quinolinethiolate	160.022	0.892	C9H6NS	34448555	#N/A	rp
FAUX	2-Formylglutarate@1.136-rp	2-Formylglutarate	160.037	1.136	C6H8O5	#N/A	Metabolic pathways;Biosynthesis of secondary metabolites;Microbial metabolism in diverse environments;Degradation of aromatic compounds;Biosynthesis of amino acids;2-Oxocarboxylic acid metabolism;Tryptophan metabolism;Other	rp
FAUX	2-Formylglutarate@1.491-rp	2-Formylglutarate	160.037	1.491	C6H8O5	#N/A	Metabolic pathways;Biosynthesis of secondary metabolites;Microbial metabolism in diverse environments;Degradation of aromatic compounds;Biosynthesis of amino acids;2-Oxocarboxylic acid metabolism;Tryptophan metabolism;Other	rp
FAUX	2-Formylglutarate@2.02-rp	2-Formylglutarate	160.037	2.02	C6H8O5	#N/A	Metabolic pathways;Biosynthesis of secondary metabolites;Microbial metabolism in diverse environments;Degradation of aromatic compounds;Biosynthesis of amino acids;2-Oxocarboxylic acid metabolism;Tryptophan metabolism;Other	rp
FAUX	160.03982@6.586-rp	#N/A	160.04	6.586	C5H9N2O2P	#N/A	#N/A	rp
FAUX	N-Formimino-L-aspartate@1.197-rp	N-Formimino-L-aspartate	160.049	1.197	C5H8N2O4	#N/A	Metabolic pathways;Other	rp
FAUX	1,2-dihydroxynaphthalene@11.418-rp	1,2-dihydroxynaphthalene	160.052	11.418	C10H8O2	#N/A	Metabolic pathways;Microbial metabolism in diverse environments;Degradation of aromatic compounds;Other	rp
FAUX	1,2-dihydroxynaphthalene@8.126-rp	1,2-dihydroxynaphthalene	160.052	8.126	C10H8O2	#N/A	Metabolic pathways;Microbial metabolism in diverse environments;Degradation of aromatic compounds;Other	rp
FAUX	1,2-dihydroxynaphthalene@4.534-rp	1,2-dihydroxynaphthalene	160.053	4.534	C10H8O2	#N/A	Metabolic pathways;Microbial metabolism in diverse environments;Degradation of aromatic compounds;Other	rp
FAUX	(1S-3R-4S)-3-4-Dihydroxycyclohexane-1-carboxylate@1.732-rp	(1S-3R-4S)-3-4-Dihydroxycyclohexane-1-carboxylate	160.074	1.732	C7H12O4	#N/A	Metabolic pathways;Other	rp
FAUX	(1S-3R-4S)-3-4-Dihydroxycyclohexane-1-carboxylate@6.324-rp	(1S-3R-4S)-3-4-Dihydroxycyclohexane-1-carboxylate	160.074	6.324	C7H12O4	#N/A	Metabolic pathways;Other	rp
FAUX	3-Methyladipicacid@6.606-rp	3-Methyladipicacid	160.074	6.606	C7H12O4	11789	Metabolic pathways;Other	rp
FAUX	3-Methyladipicacid@6.747-rp	3-Methyladipicacid	160.074	6.747	C7H12O4	11789	Metabolic pathways;Other	rp
FAUX	(1S-3R-4S)-3-4-Dihydroxycyclohexane-1-carboxylate@2.065-rp	(1S-3R-4S)-3-4-Dihydroxycyclohexane-1-carboxylate	160.074	2.065	C7H12O4	#N/A	Metabolic pathways;Other	rp
FAUX	(1S-3R-4S)-3-4-Dihydroxycyclohexane-1-carboxylate@1.864-rp	(1S-3R-4S)-3-4-Dihydroxycyclohexane-1-carboxylate	160.074	1.864	C7H12O4	#N/A	Metabolic pathways;Other	rp
FAUX	(1S-3R-4S)-3-4-Dihydroxycyclohexane-1-carboxylate@1.167-rp	(1S-3R-4S)-3-4-Dihydroxycyclohexane-1-carboxylate	160.074	1.167	C7H12O4	#N/A	#N/A	rp
FAUX	D-Ala-D-Ala@2.469-rp	D-Ala-D-Ala	160.085	2.469	C6H12N2O3	#N/A	Metabolic pathways;Microbial metabolism in diverse environments;Other	rp
FAUX	D-Ala-D-Ala@1.038-rp	D-Ala-D-Ala	160.085	1.038	C6H12N2O3	#N/A	Metabolic pathways;Microbial metabolism in diverse environments;Other	rp
FAUX	D-Ala-D-Ala@2.644-rp	D-Ala-D-Ala	160.085	2.644	C6H12N2O3	#N/A	Metabolic pathways;Microbial metabolism in diverse environments;Other	rp
FAUX	1-Benzosuberone@8.79-rp	1-Benzosuberone	160.089	8.79	C11H12O	63195	#N/A	rp
FAUX	Anatabine@3.127-rp	Anatabine	160.1	3.127	C10H12N2	229558	Metabolic pathways;Biosynthesis of secondary metabolites;Microbial metabolism in diverse environments;Biosynthesis of plant secondary metabolites;Biosynthesis of alkaloids derived from shikimate pathway;Tryptophan metabolism;Other	rp
FAUX	CZ1330000@8.321-rp	CZ1330000	160.125	8.321	C12H16	12674	#N/A	rp
FAUX	CZ1330000@19.208-rp	CZ1330000	160.125	19.208	C12H16	12674	#N/A	rp
FAUX	CZ1330000@13.387-rp	CZ1330000	160.125	13.387	C12H16	12674	#N/A	rp
FAUX	CZ1330000@13.919-rp	CZ1330000	160.125	13.919	C12H16	12674	#N/A	rp
FAUX	CZ1330000@15.52-rp	CZ1330000	160.125	15.52	C12H16	12674	#N/A	rp
FAUX	CZ1330000@6.827-rp	CZ1330000	160.125	6.827	C12H16	12674	#N/A	rp
FAUX	CZ1330000@7.497-rp	CZ1330000	160.125	7.497	C12H16	12674	#N/A	rp
FAUX	CZ1330000@15.059-rp	CZ1330000	160.125	15.059	C12H16	12674	#N/A	rp
FAUX	CZ1330000@16.259-rp	CZ1330000	160.125	16.259	C12H16	12674	#N/A	rp
FAUX	2-(pent-4-enyl)toluene@17.807-rp	2-(pent-4-enyl)toluene	160.125	17.807	C12H16	9052694	#N/A	rp
FAUX	160.55726@4.713-rp	#N/A	160.557	4.713	#N/A	#N/A	#N/A	rp
FAUX	160.57199@1.471-rp	#N/A	160.572	1.471	#N/A	#N/A	#N/A	rp
FAUX	160.58864@1.475-rp	#N/A	160.589	1.475	#N/A	#N/A	#N/A	rp
FAUX	160.59023@1.467-rp	#N/A	160.59	1.467	#N/A	#N/A	#N/A	rp
FAUX	1-(2-Thioxo-1,3-thiazolidin-3-yl)ethanone@0.959-rp	1-(2-Thioxo-1,3-thiazolidin-3-yl)ethanone	160.997	0.959	C5H7NOS2	9964195	#N/A	rp
FAUX	Methyl2,3,3-tricyanoacrylate@0.887-rp	Methyl2,3,3-tricyanoacrylate	161.023	0.887	C7H3N3O2	10274330	#N/A	rp
FAUX	4-Phosphorylproline@6.582-rp	4-Phosphorylproline	161.025	6.582	C5H8NO3P	20482582	#N/A	rp
FAUX	N-Formyl-L-aspartate@1.106-rp	N-Formyl-L-aspartate	161.033	1.106	C5H7NO5	#N/A	Metabolic pathways;Other	rp
FAUX	3-hydroxy-1H-quinolin-4-one@16.169-rp	3-hydroxy-1H-quinolin-4-one	161.048	16.169	C9H7NO2	#N/A	Metabolic pathways;Biosynthesis of alkaloids derived from shikimate pathway;Tryptophan metabolism	rp
FAUX	3-hydroxy-1H-quinolin-4-one@1.986-rp	3-hydroxy-1H-quinolin-4-one	161.048	1.986	C9H7NO2	#N/A	Metabolic pathways;Biosynthesis of alkaloids derived from shikimate pathway;Tryptophan metabolism	rp
FAUX	3-hydroxy-1H-quinolin-4-one@9.112-rp	3-hydroxy-1H-quinolin-4-one	161.048	9.112	C9H7NO2	#N/A	Metabolic pathways;Biosynthesis of alkaloids derived from shikimate pathway;Tryptophan metabolism	rp
FAUX	1,5-Isoquinolinediol@2.317-rp	1,5-Isoquinolinediol	161.048	2.317	C9H7NO2	#N/A	Metabolic pathways;Biosynthesis of alkaloids derived from shikimate pathway;Tryptophan metabolism	rp
FAUX	1,5-Isoquinolinediol@6.585-rp	1,5-Isoquinolinediol	161.048	6.585	C9H7NO2	#N/A	Metabolic pathways;Biosynthesis of alkaloids derived from shikimate pathway;Tryptophan metabolism	rp
FAUX	3-hydroxy-1H-quinolin-4-one@4.922-rp	3-hydroxy-1H-quinolin-4-one	161.048	4.922	C9H7NO2	#N/A	Metabolic pathways;Biosynthesis of alkaloids derived from shikimate pathway;Tryptophan metabolism	rp
FAUX	2,4-Quinolinediol@8.188-rp	2,4-Quinolinediol	161.048	8.188	C9H7NO2	#N/A	Metabolic pathways;Biosynthesis of alkaloids derived from shikimate pathway;Tryptophan metabolism	rp
FAUX	1,5-Isoquinolinediol@5.576-rp	1,5-Isoquinolinediol	161.048	5.576	C9H7NO2	#N/A	Metabolic pathways;Biosynthesis of alkaloids derived from shikimate pathway;Tryptophan metabolism	rp
FAUX	3-hydroxy-1H-quinolin-4-one@7.62-rp	3-hydroxy-1H-quinolin-4-one	161.048	7.62	C9H7NO2	#N/A	Metabolic pathways;Biosynthesis of alkaloids derived from shikimate pathway;Tryptophan metabolism	rp
FAUX	2,4-Quinolinediol@6.254-rp	2,4-Quinolinediol	161.048	6.254	C9H7NO2	#N/A	Metabolic pathways;Biosynthesis of alkaloids derived from shikimate pathway;Tryptophan metabolism	rp
FAUX	2,4-Quinolinediol@8.727-rp	2,4-Quinolinediol	161.048	8.727	C9H7NO2	#N/A	Metabolic pathways;Biosynthesis of alkaloids derived from shikimate pathway;Tryptophan metabolism	rp
FAUX	3-hydroxy-1H-quinolin-4-one@2.885-rp	3-hydroxy-1H-quinolin-4-one	161.048	2.885	C9H7NO2	#N/A	Metabolic pathways;Biosynthesis of alkaloids derived from shikimate pathway;Tryptophan metabolism	rp
FAUX	Diethylaminosulfurtrifluoride@2.081-rp	Diethylaminosulfurtrifluoride	161.048	2.081	C4H10F3NS	110068	#N/A	rp
FAUX	2-2'-Iminodipropanoate@1.182-rp	2-2'-Iminodipropanoate	161.069	1.182	C6H11NO4	#N/A	Metabolic pathways;Biosynthesis of secondary metabolites;Microbial metabolism in diverse environments;Biosynthesis of amino acids;2-Oxocarboxylic acid metabolism;Other	rp
FAUX	2-2'-Iminodipropanoate@1.082-rp	2-2'-Iminodipropanoate	161.069	1.082	C6H11NO4	#N/A	Metabolic pathways;Biosynthesis of secondary metabolites;Microbial metabolism in diverse environments;Biosynthesis of amino acids;2-Oxocarboxylic acid metabolism;Other	rp
FAUX	2-2'-Iminodipropanoate@1.519-rp	2-2'-Iminodipropanoate	161.069	1.519	C6H11NO4	#N/A	Metabolic pathways;Biosynthesis of secondary metabolites;Microbial metabolism in diverse environments;Biosynthesis of amino acids;2-Oxocarboxylic acid metabolism;Other	rp
FAUX	2-2'-Iminodipropanoate@1.427-rp	2-2'-Iminodipropanoate	161.069	1.427	C6H11NO4	#N/A	Metabolic pathways;Biosynthesis of secondary metabolites;Microbial metabolism in diverse environments;Biosynthesis of amino acids;2-Oxocarboxylic acid metabolism;Other	rp
FAUX	azidobenzamidine@6.599-rp	azidobenzamidine	161.071	6.599	C7H7N5	21376460	#N/A	rp
FAUX	Indole-3-ethanol@9.599-rp	Indole-3-ethanol	161.084	9.599	C10H11NO	#N/A	Tryptophan metabolism	rp
FAUX	2-(1H-Benzimidazol-2-yl)ethanamine@1.682-rp	2-(1H-Benzimidazol-2-yl)ethanamine	161.095	1.682	C9H11N3	367546	#N/A	rp
FAUX	(S)-Carnitine@1.074-rp	(S)-Carnitine	161.105	1.074	C7H15NO3	#N/A	Bile secretion;Other	rp
FAUX	161.53968@3.327-rp	#N/A	161.54	3.327	#N/A	#N/A	#N/A	rp
FAUX	161.55228@8.444-rp	#N/A	161.552	8.444	#N/A	#N/A	#N/A	rp
FAUX	161.56503@6.062-rp	#N/A	161.565	6.062	#N/A	#N/A	#N/A	rp
FAUX	161.57981@5.466-rp	#N/A	161.58	5.466	#N/A	#N/A	#N/A	rp
FAUX	161.61056@1.791-rp	#N/A	161.611	1.791	#N/A	#N/A	#N/A	rp
FAUX	161.99912@1.447-rp	#N/A	161.999	1.447	C5H6O4S	#N/A	#N/A	rp
FAUX	4-Hydroxy-2-oxoglutarate@1.13-rp	4-Hydroxy-2-oxoglutarate	162.017	1.13	C5H6O6	#N/A	Metabolic pathways;Other	rp
FAUX	162.01974@0.891-rp	#N/A	162.02	0.891	C4H7N2O3P	#N/A	#N/A	rp
FAUX	4-Coumarylalcohol(4-Hydroxycoumarin)@8.06-rp	4-Coumarylalcohol(4-Hydroxycoumarin)	162.032	8.06	C9H6O3	#N/A	Biosynthesis of secondary metabolites;Biosynthesis of phenylpropanoids;Phenylpropanoid biosynthesis	rp
FAUX	4-Coumarylalcohol(4-Hydroxycoumarin)@2.65-rp	4-Coumarylalcohol(4-Hydroxycoumarin)	162.032	2.65	C9H6O3	#N/A	Biosynthesis of secondary metabolites;Biosynthesis of phenylpropanoids;Phenylpropanoid biosynthesis	rp
FAUX	Umbelliferone@6.477-rp	Umbelliferone	162.032	6.477	C9H6O3	4444774	Biosynthesis of secondary metabolites;Biosynthesis of phenylpropanoids;Phenylpropanoid biosynthesis	rp
FAUX	Umbelliferone@8.466-rp	Umbelliferone	162.032	8.466	C9H6O3	4444774	Biosynthesis of secondary metabolites;Biosynthesis of phenylpropanoids;Phenylpropanoid biosynthesis	rp
FAUX	4-Coumarylalcohol(4-Hydroxycoumarin)@6.184-rp	4-Coumarylalcohol(4-Hydroxycoumarin)	162.032	6.184	C9H6O3	#N/A	Biosynthesis of secondary metabolites;Biosynthesis of phenylpropanoids;Phenylpropanoid biosynthesis	rp
FAUX	4-Coumarylalcohol(4-Hydroxycoumarin)@7.569-rp	4-Coumarylalcohol(4-Hydroxycoumarin)	162.032	7.569	C9H6O3	#N/A	Biosynthesis of secondary metabolites;Biosynthesis of phenylpropanoids;Phenylpropanoid biosynthesis	rp
FAUX	4-Coumarylalcohol(4-Hydroxycoumarin)@6.897-rp	4-Coumarylalcohol(4-Hydroxycoumarin)	162.032	6.897	C9H6O3	#N/A	Biosynthesis of secondary metabolites;Biosynthesis of phenylpropanoids;Phenylpropanoid biosynthesis	rp
FAUX	162.03508@2.135-rp	#N/A	162.035	2.135	C8H7N2P	#N/A	Metabolic pathways;Biosynthesis of secondary metabolites;2-Oxocarboxylic acid metabolism;Other	rp
FAUX	1-2-Dihydroxy-5-(methylthio)pent-1-en-3-one@1.157-rp	1-2-Dihydroxy-5-(methylthio)pent-1-en-3-one	162.035	1.157	C6H10O3S	#N/A	Metabolic pathways;Biosynthesis of secondary metabolites;2-Oxocarboxylic acid metabolism;Other	rp
FAUX	(2R-3S)-2-3-Dimethylmalate@1.099-rp	(2R-3S)-2-3-Dimethylmalate	162.053	1.099	C6H10O5	#N/A	Metabolic pathways;Biosynthesis of secondary metabolites;Microbial metabolism in diverse environments;Other	rp
FAUX	(2R-3S)-2-3-Dimethylmalate@1.423-rp	(2R-3S)-2-3-Dimethylmalate	162.053	1.423	C6H10O5	#N/A	Metabolic pathways;Biosynthesis of secondary metabolites;Microbial metabolism in diverse environments;Other	rp
FAUX	3-Hydroxy-3-methylglutaricacid@1.738-rp	3-Hydroxy-3-methylglutaricacid	162.053	1.738	C6H10O5	#N/A	Metabolic pathways;Biosynthesis of secondary metabolites;Microbial metabolism in diverse environments;Other	rp
FAUX	3-Hydroxy-3-methylglutaricacid@2.05-rp	3-Hydroxy-3-methylglutaricacid	162.053	2.05	C6H10O5	#N/A	Metabolic pathways;Biosynthesis of secondary metabolites;Microbial metabolism in diverse environments;Other	rp
FAUX	(2R-3S)-2-3-Dimethylmalate@1.274-rp	(2R-3S)-2-3-Dimethylmalate	162.053	1.274	C6H10O5	#N/A	Metabolic pathways;Biosynthesis of secondary metabolites;Microbial metabolism in diverse environments;Other	rp
FAUX	(2R-3S)-2-3-Dimethylmalate@3.456-rp	(2R-3S)-2-3-Dimethylmalate	162.053	3.456	C6H10O5	#N/A	Metabolic pathways;Biosynthesis of secondary metabolites;Microbial metabolism in diverse environments;Other	rp
FAUX	Carbonyldiimidazole@1.525-rp	Carbonyldiimidazole	162.054	1.525	C7H6N4O	61561	#N/A	rp
FAUX	TABUN@1.515-rp	TABUN	162.055	1.515	C5H11N2O2P	6254	#N/A	rp
FAUX	Glycylserine@1.052-rp	Glycylserine	162.064	1.052	C5H10N2O4	#N/A	#N/A	rp
FAUX	Glycylserine@1.259-rp	Glycylserine	162.064	1.259	C5H10N2O4	#N/A	#N/A	rp
FAUX	4-Hydroxycinnamoylmethane@10.373-rp	4-Hydroxycinnamoylmethane	162.068	10.373	C10H10O2	#N/A	Metabolic pathways;Microbial metabolism in diverse environments;Degradation of aromatic compounds;Other	rp
FAUX	4-Hydroxycinnamoylmethane@8.362-rp	4-Hydroxycinnamoylmethane	162.068	8.362	C10H10O2	#N/A	Metabolic pathways;Microbial metabolism in diverse environments;Degradation of aromatic compounds;Other	rp
FAUX	4-Hydroxycinnamoylmethane@12.763-rp	4-Hydroxycinnamoylmethane	162.068	12.763	C10H10O2	#N/A	Metabolic pathways;Microbial metabolism in diverse environments;Degradation of aromatic compounds;Other	rp
FAUX	162.0723@1.145-rp	#N/A	162.072	1.145	C7H16P2	#N/A	Metabolic pathways;Microbial metabolism in diverse environments;Other	rp
FAUX	3-Ethyl-3,5-dihydroxypentanoicacid@2.577-rp	3-Ethyl-3,5-dihydroxypentanoicacid	162.089	2.577	C7H14O4	2338918	#N/A	rp
FAUX	3-Ethyl-3,5-dihydroxypentanoicacid@3.876-rp	3-Ethyl-3,5-dihydroxypentanoicacid	162.089	3.876	C7H14O4	2338918	#N/A	rp
FAUX	3-Ethyl-3,5-dihydroxypentanoicacid@2.788-rp	3-Ethyl-3,5-dihydroxypentanoicacid	162.09	2.788	C7H14O4	2338918	#N/A	rp
FAUX	3-Ethyl-3,5-dihydroxypentanoicacid@4.147-rp	3-Ethyl-3,5-dihydroxypentanoicacid	162.09	4.147	C7H14O4	2338918	#N/A	rp
FAUX	Methyl3,6-dideoxy-alpha-D-ribo-hexopyranoside@2.278-rp	Methyl3,6-dideoxy-alpha-D-ribo-hexopyranoside	162.09	2.278	C7H14O4	167610	#N/A	rp
FAUX	3-Ethyl-3,5-dihydroxypentanoicacid@3.084-rp	3-Ethyl-3,5-dihydroxypentanoicacid	162.09	3.084	C7H14O4	2338918	#N/A	rp
FAUX	Valerophenone;1-phenylpentan-1-one@9.995-rp	Valerophenone;1-phenylpentan-1-one	162.104	9.995	C11H14O	#N/A	Metabolic pathways;Biosynthesis of secondary metabolites;Ubiquinone and other terpenoid-quinone biosynthesis	rp
FAUX	162.1042@11.117-rp	#N/A	162.104	11.117	C5H15N4P	#N/A	Metabolic pathways;Biosynthesis of secondary metabolites;Ubiquinone and other terpenoid-quinone biosynthesis	rp
FAUX	Valerophenone;1-phenylpentan-1-one@10.653-rp	Valerophenone;1-phenylpentan-1-one	162.104	10.653	C11H14O	#N/A	Metabolic pathways;Biosynthesis of secondary metabolites;Ubiquinone and other terpenoid-quinone biosynthesis	rp
FAUX	Valerophenone;1-phenylpentan-1-one@9.862-rp	Valerophenone;1-phenylpentan-1-one	162.104	9.862	C11H14O	#N/A	Metabolic pathways;Biosynthesis of secondary metabolites;Ubiquinone and other terpenoid-quinone biosynthesis	rp
FAUX	Valerophenone;1-phenylpentan-1-one@13.383-rp	Valerophenone;1-phenylpentan-1-one	162.104	13.383	C11H14O	#N/A	Metabolic pathways;Biosynthesis of secondary metabolites;Ubiquinone and other terpenoid-quinone biosynthesis	rp
FAUX	Valerophenone;1-phenylpentan-1-one@7.79-rp	Valerophenone;1-phenylpentan-1-one	162.104	7.79	C11H14O	#N/A	Metabolic pathways;Biosynthesis of secondary metabolites;Ubiquinone and other terpenoid-quinone biosynthesis	rp
FAUX	Valerophenone;1-phenylpentan-1-one@8.912-rp	Valerophenone;1-phenylpentan-1-one	162.104	8.912	C11H14O	#N/A	Metabolic pathways;Biosynthesis of secondary metabolites;Ubiquinone and other terpenoid-quinone biosynthesis	rp
FAUX	Valerophenone;1-phenylpentan-1-one@8.461-rp	Valerophenone;1-phenylpentan-1-one	162.104	8.461	C11H14O	#N/A	Metabolic pathways;Biosynthesis of secondary metabolites;Ubiquinone and other terpenoid-quinone biosynthesis	rp
FAUX	Valerophenone;1-phenylpentan-1-one@9.138-rp	Valerophenone;1-phenylpentan-1-one	162.104	9.138	C11H14O	#N/A	Metabolic pathways;Biosynthesis of secondary metabolites;Ubiquinone and other terpenoid-quinone biosynthesis	rp
FAUX	1-t-butyl-4-ethylbenzene@18.562-rp	1-t-butyl-4-ethylbenzene	162.141	18.562	C12H18	73840	#N/A	rp
FAUX	1-t-butyl-4-ethylbenzene@15.063-rp	1-t-butyl-4-ethylbenzene	162.141	15.063	C12H18	73840	#N/A	rp
FAUX	1-t-butyl-4-ethylbenzene@17.779-rp	1-t-butyl-4-ethylbenzene	162.141	17.779	C12H18	73840	#N/A	rp
FAUX	2,10-Dodecadiyne@8.325-rp	2,10-Dodecadiyne	162.141	8.325	C12H18	124979	#N/A	rp
FAUX	1-t-butyl-4-ethylbenzene@8.883-rp	1-t-butyl-4-ethylbenzene	162.141	8.883	C12H18	73840	#N/A	rp
FAUX	162.54758@4.422-rp	#N/A	162.548	4.422	#N/A	#N/A	#N/A	rp
FAUX	162.55646@0.959-rp	#N/A	162.556	0.959	#N/A	#N/A	#N/A	rp
FAUX	162.56916@1.033-rp	#N/A	162.569	1.033	#N/A	#N/A	#N/A	rp
FAUX	162.97073@1.02-rp	#N/A	162.971	1.02	C2H3N3O2P2	#N/A	#N/A	rp
FAUX	163.0069@2.345-rp	#N/A	163.007	2.345	C3H7N3OP2	#N/A	#N/A	rp
FAUX	5-hydroxyisatin@2.315-rp	5-hydroxyisatin	163.027	2.315	C8H5NO3	8527463	#N/A	rp
FAUX	N-acetyl-DL-cysteine@1.914-rp	N-acetyl-DL-cysteine	163.031	1.914	C5H9NO3S	#N/A	#N/A	rp
FAUX	N-acetyl-DL-cysteine@14.196-rp	N-acetyl-DL-cysteine	163.031	14.196	C5H9NO3S	#N/A	#N/A	rp
FAUX	N-acetyl-DL-cysteine@11.057-rp	N-acetyl-DL-cysteine	163.031	11.057	C5H9NO3S	#N/A	#N/A	rp
FAUX	N-acetyl-DL-cysteine@2.123-rp	N-acetyl-DL-cysteine	163.031	2.123	C5H9NO3S	#N/A	#N/A	rp
FAUX	N-acetyl-DL-cysteine@8.772-rp	N-acetyl-DL-cysteine	163.031	8.772	C5H9NO3S	#N/A	#N/A	rp
FAUX	N-acetyl-DL-cysteine@7.248-rp	N-acetyl-DL-cysteine	163.031	7.248	C5H9NO3S	#N/A	#N/A	rp
FAUX	3-Hydroxy-L-glutamate@1.109-rp	3-Hydroxy-L-glutamate	163.048	1.109	C5H9NO5	#N/A	Metabolic pathways;Other	rp
FAUX	Pterin@2.795-rp	Pterin	163.05	2.795	C6H5N5O	#N/A	#N/A	rp
FAUX	3-Methyldioxyindole@4.713-rp	3-Methyldioxyindole	163.063	4.713	C9H9NO2	#N/A	Metabolic pathways;Microbial metabolism in diverse environments;Tryptophan metabolism;Other	rp
FAUX	3-Methyldioxyindole@4.499-rp	3-Methyldioxyindole	163.063	4.499	C9H9NO2	#N/A	Metabolic pathways;Microbial metabolism in diverse environments;Tryptophan metabolism;Other	rp
FAUX	3-Methyldioxyindole@7.879-rp	3-Methyldioxyindole	163.063	7.879	C9H9NO2	#N/A	Metabolic pathways;Microbial metabolism in diverse environments;Tryptophan metabolism;Other	rp
FAUX	3-Methyldioxyindole@8.757-rp	3-Methyldioxyindole	163.063	8.757	C9H9NO2	#N/A	Metabolic pathways;Microbial metabolism in diverse environments;Tryptophan metabolism;Other	rp
FAUX	3-Methyldioxyindole@8.292-rp	3-Methyldioxyindole	163.063	8.292	C9H9NO2	#N/A	Metabolic pathways;Microbial metabolism in diverse environments;Tryptophan metabolism;Other	rp
FAUX	3-Methyldioxyindole@9.388-rp	3-Methyldioxyindole	163.063	9.388	C9H9NO2	#N/A	Metabolic pathways;Microbial metabolism in diverse environments;Tryptophan metabolism;Other	rp
FAUX	4-Indolecarbaldehyde@2.89-rp	4-Indolecarbaldehyde	163.063	2.89	C9H7NO	#N/A	Metabolic pathways;Microbial metabolism in diverse environments;Tryptophan metabolism;Other	rp
FAUX	3-Methyldioxyindole@6.584-rp	3-Methyldioxyindole	163.063	6.584	C9H9NO2	#N/A	Metabolic pathways;Microbial metabolism in diverse environments;Tryptophan metabolism;Other	rp
FAUX	3-Methyldioxyindole@5.575-rp	3-Methyldioxyindole	163.063	5.575	C9H9NO2	#N/A	Metabolic pathways;Microbial metabolism in diverse environments;Tryptophan metabolism;Other	rp
FAUX	4-Indolecarbaldehyde@3.206-rp	4-Indolecarbaldehyde	163.063	3.206	C9H7NO	#N/A	Metabolic pathways;Microbial metabolism in diverse environments;Tryptophan metabolism;Other	rp
FAUX	3-Methyldioxyindole@6.449-rp	3-Methyldioxyindole	163.063	6.449	C9H9NO2	#N/A	Metabolic pathways;Microbial metabolism in diverse environments;Tryptophan metabolism;Other	rp
FAUX	Ethionine@1.725-rp	Ethionine	163.067	1.725	C6H13NO2S	#N/A	Biosynthesis of secondary metabolites;2-Oxocarboxylic acid metabolism;Other	rp
FAUX	Ethionine@1.461-rp	Ethionine	163.067	1.461	C6H13NO2S	#N/A	Biosynthesis of secondary metabolites;2-Oxocarboxylic acid metabolism;Other	rp
FAUX	Triethoxysilyl@1.049-rp	Triethoxysilyl	163.079	1.049	C6H15O3Si	4886163	#N/A	rp
FAUX	1-deoxynojirimycin@1.069-rp	1-deoxynojirimycin	163.085	1.069	C6H13NO4	#N/A	Biosynthesis of secondary metabolites;Other	rp
FAUX	163.09624@1.278-rp	#N/A	163.096	1.278	C5H13N3O3	#N/A	#N/A	rp
FAUX	163.0977@1.667-rp	#N/A	163.098	1.667	#N/A	#N/A	#N/A	rp
FAUX	(R)-2-Methylimino-1-phenylpropan-1-ol@1.022-rp	(R)-2-Methylimino-1-phenylpropan-1-ol	163.1	1.022	C10H13NO	9656489	Metabolic pathways;Phenylalanine metabolism	rp
FAUX	(R)-2-Methylimino-1-phenylpropan-1-ol@7.889-rp	(R)-2-Methylimino-1-phenylpropan-1-ol	163.1	7.889	C10H13NO	9656489	Metabolic pathways;Phenylalanine metabolism	rp
FAUX	TRIS(HYDROXYETHYL)AMINOMETHANE@1.022-rp	TRIS(HYDROXYETHYL)AMINOMETHANE	163.121	1.022	C7H17NO3	394944	#N/A	rp
FAUX	163.50453@1.914-rp	#N/A	163.505	1.914	#N/A	#N/A	#N/A	rp
FAUX	163.51531@7.621-rp	#N/A	163.515	7.621	#N/A	#N/A	#N/A	rp
FAUX	163.52631@6.588-rp	#N/A	163.526	6.588	#N/A	#N/A	#N/A	rp
FAUX	163.55824@1.05-rp	#N/A	163.558	1.05	#N/A	#N/A	#N/A	rp
FAUX	163.55895@1.046-rp	#N/A	163.559	1.046	#N/A	#N/A	#N/A	rp
FAUX	163.56784@12.864-rp	#N/A	163.568	12.864	#N/A	#N/A	#N/A	rp
FAUX	163.56799@8.414-rp	#N/A	163.568	8.414	#N/A	#N/A	#N/A	rp
FAUX	163.62137@6.276-rp	#N/A	163.621	6.276	#N/A	#N/A	#N/A	rp
FAUX	163.92269@0.987-rp	#N/A	163.923	0.987	#N/A	#N/A	#N/A	rp
FAUX	118077@0.938-rp	118077	163.994	0.938	C8H4O2S	87828	#N/A	rp
FAUX	danosteine@1.434-rp	danosteine	164.015	1.434	C5H8O4S	64341	#N/A	rp
FAUX	danosteine@1.328-rp	danosteine	164.015	1.328	C5H8O4S	64341	#N/A	rp
FAUX	Pentofuranuronicacid@1.099-rp	Pentofuranuronicacid	164.032	1.099	C5H8O6	14248296	#N/A	rp
FAUX	2-4-Dihydroxypteridine@2.12-rp	2-4-Dihydroxypteridine	164.034	2.12	C6H4N4O2	#N/A	#N/A	rp
FAUX	1-Nitro-2-(2-nitroethoxy)ethane@0.893-rp	1-Nitro-2-(2-nitroethoxy)ethane	164.044	0.893	C4H8N2O5	5256798	#N/A	rp
FAUX	2-coumarate@3.944-rp	2-coumarate	164.047	3.944	C9H8O3	#N/A	Metabolic pathways;Biosynthesis of secondary metabolites;Microbial metabolism in diverse environments;Degradation of aromatic compounds;Biosynthesis of plant secondary metabolites;Biosynthesis of phenylpropanoids;Phenylpropanoid biosynthesis;Biosynthesis of amino acids;2-Oxocarboxylic acid metabolism;Tyrosine metabolism;Phenylalanine metabolism;Ubiquinone and other terpenoid-quinone biosynthesis;…	rp
FAUX	Sinapinicacid@9.534-rp	Sinapinicacid	164.047	9.534	C11H12O5	553361	Metabolic pathways;Biosynthesis of secondary metabolites;Microbial metabolism in diverse environments;Degradation of aromatic compounds;Biosynthesis of plant secondary metabolites;Biosynthesis of phenylpropanoids;Phenylpropanoid biosynthesis;Biosynthesis of amino acids;2-Oxocarboxylic acid metabolism;Tyrosine metabolism;Phenylalanine metabolism;Ubiquinone and other terpenoid-quinone biosynthesis;…	rp
FAUX	3-(3,4-dihydroxyphenyl)propanoicacid@6.102-rp	3-(3,4-dihydroxyphenyl)propanoicacid	164.047	6.102	C9H10O4	#N/A	Metabolic pathways;Biosynthesis of secondary metabolites;Microbial metabolism in diverse environments;Degradation of aromatic compounds;Biosynthesis of plant secondary metabolites;Biosynthesis of phenylpropanoids;Phenylpropanoid biosynthesis;Biosynthesis of amino acids;2-Oxocarboxylic acid metabolism;Tyrosine metabolism;Phenylalanine metabolism;Ubiquinone and other terpenoid-quinone biosynthesis;…	rp
FAUX	2-coumarate@3.63-rp	2-coumarate	164.048	3.63	C9H8O3	#N/A	Metabolic pathways;Biosynthesis of secondary metabolites;Microbial metabolism in diverse environments;Degradation of aromatic compounds;Biosynthesis of plant secondary metabolites;Biosynthesis of phenylpropanoids;Phenylpropanoid biosynthesis;Biosynthesis of amino acids;2-Oxocarboxylic acid metabolism;Tyrosine metabolism;Phenylalanine metabolism;Ubiquinone and other terpenoid-quinone biosynthesis;…	rp
FAUX	2-coumarate@4.633-rp	2-coumarate	164.048	4.633	C9H8O3	#N/A	Metabolic pathways;Biosynthesis of secondary metabolites;Microbial metabolism in diverse environments;Degradation of aromatic compounds;Biosynthesis of plant secondary metabolites;Biosynthesis of phenylpropanoids;Phenylpropanoid biosynthesis;Biosynthesis of amino acids;2-Oxocarboxylic acid metabolism;Tyrosine metabolism;Phenylalanine metabolism;Ubiquinone and other terpenoid-quinone biosynthesis;…	rp
FAUX	2-Hydroxyphenylalanine@1.496-rp	2-Hydroxyphenylalanine	164.048	1.496	C9H11NO3	#N/A	Metabolic pathways;Biosynthesis of secondary metabolites;Microbial metabolism in diverse environments;Degradation of aromatic compounds;Biosynthesis of plant secondary metabolites;Biosynthesis of phenylpropanoids;Phenylpropanoid biosynthesis;Biosynthesis of amino acids;2-Oxocarboxylic acid metabolism;Tyrosine metabolism;Phenylalanine metabolism;Ubiquinone and other terpenoid-quinone biosynthesis;…	rp
FAUX	2-coumarate@8.223-rp	2-coumarate	164.048	8.223	C9H8O3	#N/A	Metabolic pathways;Biosynthesis of secondary metabolites;Microbial metabolism in diverse environments;Degradation of aromatic compounds;Biosynthesis of plant secondary metabolites;Biosynthesis of phenylpropanoids;Phenylpropanoid biosynthesis;Biosynthesis of amino acids;2-Oxocarboxylic acid metabolism;Tyrosine metabolism;Phenylalanine metabolism;Ubiquinone and other terpenoid-quinone biosynthesis;…	rp
FAUX	2-coumarate@12.959-rp	2-coumarate	164.048	12.959	C9H8O3	#N/A	Metabolic pathways;Biosynthesis of secondary metabolites;Microbial metabolism in diverse environments;Degradation of aromatic compounds;Biosynthesis of plant secondary metabolites;Biosynthesis of phenylpropanoids;Phenylpropanoid biosynthesis;Biosynthesis of amino acids;2-Oxocarboxylic acid metabolism;Tyrosine metabolism;Phenylalanine metabolism;Ubiquinone and other terpenoid-quinone biosynthesis;…	rp
FAUX	2-coumarate@10.307-rp	2-coumarate	164.048	10.307	C9H8O3	#N/A	Metabolic pathways;Biosynthesis of secondary metabolites;Microbial metabolism in diverse environments;Degradation of aromatic compounds;Biosynthesis of plant secondary metabolites;Biosynthesis of phenylpropanoids;Phenylpropanoid biosynthesis;Biosynthesis of amino acids;2-Oxocarboxylic acid metabolism;Tyrosine metabolism;Phenylalanine metabolism;Ubiquinone and other terpenoid-quinone biosynthesis;…	rp
FAUX	3-Coumaricacid@8.776-rp	3-Coumaricacid	164.048	8.776	C9H8O3	#N/A	Metabolic pathways;Biosynthesis of secondary metabolites;Microbial metabolism in diverse environments;Degradation of aromatic compounds;Biosynthesis of plant secondary metabolites;Biosynthesis of phenylpropanoids;Phenylpropanoid biosynthesis;Biosynthesis of amino acids;2-Oxocarboxylic acid metabolism;Tyrosine metabolism;Phenylalanine metabolism;Ubiquinone and other terpenoid-quinone biosynthesis;…	rp
FAUX	2-coumarate@4.401-rp	2-coumarate	164.048	4.401	C9H8O3	#N/A	Metabolic pathways;Biosynthesis of secondary metabolites;Microbial metabolism in diverse environments;Degradation of aromatic compounds;Biosynthesis of plant secondary metabolites;Biosynthesis of phenylpropanoids;Phenylpropanoid biosynthesis;Biosynthesis of amino acids;2-Oxocarboxylic acid metabolism;Tyrosine metabolism;Phenylalanine metabolism;Ubiquinone and other terpenoid-quinone biosynthesis;…	rp
FAUX	2-coumarate@2.141-rp	2-coumarate	164.048	2.141	C9H8O3	#N/A	Metabolic pathways;Biosynthesis of secondary metabolites;Microbial metabolism in diverse environments;Degradation of aromatic compounds;Biosynthesis of plant secondary metabolites;Biosynthesis of phenylpropanoids;Phenylpropanoid biosynthesis;Biosynthesis of amino acids;2-Oxocarboxylic acid metabolism;Tyrosine metabolism;Phenylalanine metabolism;Ubiquinone and other terpenoid-quinone biosynthesis;…	rp
FAUX	2-coumarate@7.825-rp	2-coumarate	164.048	7.825	C9H8O3	#N/A	Metabolic pathways;Biosynthesis of secondary metabolites;Microbial metabolism in diverse environments;Degradation of aromatic compounds;Biosynthesis of plant secondary metabolites;Biosynthesis of phenylpropanoids;Phenylpropanoid biosynthesis;Biosynthesis of amino acids;2-Oxocarboxylic acid metabolism;Tyrosine metabolism;Phenylalanine metabolism;Ubiquinone and other terpenoid-quinone biosynthesis;…	rp
FAUX	2-coumarate@5.335-rp	2-coumarate	164.048	5.335	C9H8O3	#N/A	Metabolic pathways;Biosynthesis of secondary metabolites;Microbial metabolism in diverse environments;Degradation of aromatic compounds;Biosynthesis of plant secondary metabolites;Biosynthesis of phenylpropanoids;Phenylpropanoid biosynthesis;Biosynthesis of amino acids;2-Oxocarboxylic acid metabolism;Tyrosine metabolism;Phenylalanine metabolism;Ubiquinone and other terpenoid-quinone biosynthesis;…	rp
FAUX	164.05098@4.392-rp	#N/A	164.051	4.392	C8H9N2P	#N/A	#N/A	rp
FAUX	164.05101@5.506-rp	#N/A	164.051	5.506	C8H9N2P	#N/A	#N/A	rp
FAUX	Ricinine@2.187-rp	Ricinine	164.059	2.187	C8H8N2O2	#N/A	#N/A	rp
FAUX	1-5-Anhydro-D-mannitol@1.932-rp	1-5-Anhydro-D-mannitol	164.069	1.932	C6H12O5	#N/A	Metabolic pathways;Microbial metabolism in diverse environments;ABC transporters;Other	rp
FAUX	Butylpropyldisulfide@1.065-rp	Butylpropyldisulfide	164.069	1.065	C7H16S2	455741	Metabolic pathways;Microbial metabolism in diverse environments;ABC transporters;Other	rp
FAUX	D-(+)-Fucose@1.238-rp	D-(+)-Fucose	164.069	1.238	C6H12O5	388721	Metabolic pathways;Microbial metabolism in diverse environments;ABC transporters;Other	rp
FAUX	Eugenol;4-Allylguaiacol@9.863-rp	Eugenol;4-Allylguaiacol	164.084	9.863	C10H12O2	#N/A	Metabolic pathways;Microbial metabolism in diverse environments;Degradation of aromatic compounds;Phenylpropanoid biosynthesis;Other	rp
FAUX	Eugenol;4-Allylguaiacol@12.597-rp	Eugenol;4-Allylguaiacol	164.084	12.597	C10H12O2	#N/A	Metabolic pathways;Microbial metabolism in diverse environments;Degradation of aromatic compounds;Phenylpropanoid biosynthesis;Other	rp
FAUX	Eugenol;4-Allylguaiacol@18.86-rp	Eugenol;4-Allylguaiacol	164.084	18.86	C10H12O2	#N/A	Metabolic pathways;Microbial metabolism in diverse environments;Degradation of aromatic compounds;Phenylpropanoid biosynthesis;Other	rp
FAUX	Eugenol;4-Allylguaiacol@13.499-rp	Eugenol;4-Allylguaiacol	164.084	13.499	C10H12O2	#N/A	Metabolic pathways;Microbial metabolism in diverse environments;Degradation of aromatic compounds;Phenylpropanoid biosynthesis;Other	rp
FAUX	Eugenol;4-Allylguaiacol@8.452-rp	Eugenol;4-Allylguaiacol	164.084	8.452	C10H12O2	#N/A	Metabolic pathways;Microbial metabolism in diverse environments;Degradation of aromatic compounds;Phenylpropanoid biosynthesis;Other	rp
FAUX	Eugenol;4-Allylguaiacol@6.219-rp	Eugenol;4-Allylguaiacol	164.084	6.219	C10H12O2	#N/A	Metabolic pathways;Microbial metabolism in diverse environments;Degradation of aromatic compounds;Phenylpropanoid biosynthesis;Other	rp
FAUX	Eugenol;4-Allylguaiacol@8.687-rp	Eugenol;4-Allylguaiacol	164.084	8.687	C10H12O2	#N/A	Metabolic pathways;Microbial metabolism in diverse environments;Degradation of aromatic compounds;Phenylpropanoid biosynthesis;Other	rp
FAUX	Eugenol;4-Allylguaiacol@9.477-rp	Eugenol;4-Allylguaiacol	164.084	9.477	C10H12O2	#N/A	Metabolic pathways;Microbial metabolism in diverse environments;Degradation of aromatic compounds;Phenylpropanoid biosynthesis;Other	rp
FAUX	164.08566@13.507-rp	#N/A	164.086	13.507	#N/A	#N/A	#N/A	rp
FAUX	1,3-Propanediylbis(dimethylphosphine)@1.055-rp	1,3-Propanediylbis(dimethylphosphine)	164.088	1.055	C7H18P2	3567349	#N/A	rp
FAUX	Triethyleneglycolmonomethylether@1.479-rp	Triethyleneglycolmonomethylether	164.104	1.479	C7H16O4	7886	#N/A	rp
FAUX	Triethyleneglycolmonomethylether@6.493-rp	Triethyleneglycolmonomethylether	164.105	6.493	C7H16O4	7886	#N/A	rp
FAUX	Triethyleneglycolmonomethylether@1.471-rp	Triethyleneglycolmonomethylether	164.106	1.471	C7H16O4	7886	#N/A	rp
FAUX	(E)-Azobis(isobutyronitrile)@1.283-rp	(E)-Azobis(isobutyronitrile)	164.106	1.283	C8H12N4	6299	#N/A	rp
FAUX	Fenipentol@12.644-rp	Fenipentol	164.12	12.644	C11H16O	3221	#N/A	rp
FAUX	Fenipentol@17.776-rp	Fenipentol	164.12	17.776	C11H16O	3221	#N/A	rp
FAUX	Fenipentol@10.51-rp	Fenipentol	164.12	10.51	C11H16O	3221	#N/A	rp
FAUX	Fenipentol@10.167-rp	Fenipentol	164.12	10.167	C11H16O	3221	#N/A	rp
FAUX	Fenipentol@12.327-rp	Fenipentol	164.12	12.327	C11H16O	3221	#N/A	rp
FAUX	Fenipentol@15.496-rp	Fenipentol	164.12	15.496	C11H16O	3221	#N/A	rp
FAUX	N-Benzyl-N,N-dimethylethanaminium@9.271-rp	N-Benzyl-N,N-dimethylethanaminium	164.144	9.271	C11H18N	9985084	#N/A	rp
FAUX	164.54865@14.298-rp	#N/A	164.549	14.298	#N/A	#N/A	#N/A	rp
FAUX	(3S)-1,2-Thiazolidine-3-carboxylicacid1,1-dioxide@1.443-rp	(3S)-1,2-Thiazolidine-3-carboxylicacid1,1-dioxide	165.01	1.443	C4H7NO4S	337796	#N/A	rp
FAUX	4-Nitroacetophenone@6.563-rp	4-Nitroacetophenone	165.042	6.563	C8H7NO3	#N/A	Metabolic pathways;Biosynthesis of secondary metabolites;Microbial metabolism in diverse environments;Tryptophan metabolism;Other	rp
FAUX	4-Nitroacetophenone@2.951-rp	4-Nitroacetophenone	165.043	2.951	C8H7NO3	#N/A	Metabolic pathways;Biosynthesis of secondary metabolites;Microbial metabolism in diverse environments;Tryptophan metabolism;Other	rp
FAUX	4-Nitroacetophenone@3.298-rp	4-Nitroacetophenone	165.043	3.298	C8H7NO3	#N/A	Metabolic pathways;Biosynthesis of secondary metabolites;Microbial metabolism in diverse environments;Tryptophan metabolism;Other	rp
FAUX	4-Nitroacetophenone@1.469-rp	4-Nitroacetophenone	165.043	1.469	C8H7NO3	#N/A	Metabolic pathways;Biosynthesis of secondary metabolites;Microbial metabolism in diverse environments;Tryptophan metabolism;Other	rp
FAUX	165.04605@1.072-rp	#N/A	165.046	1.072	C7H8N3P	#N/A	Other	rp
FAUX	MFCD00674100@1.176-rp	MFCD00674100	165.054	1.176	C7H7N3O2	746425	#N/A	rp
FAUX	1-Methylguanine@4.556-rp	1-Methylguanine	165.065	4.556	C6H7N5O	63498	#N/A	rp
FAUX	1-Methylguanine@3.273-rp	1-Methylguanine	165.065	3.273	C6H7N5O	63498	#N/A	rp
FAUX	165.06523@1.677-rp	#N/A	165.065	1.677	C6H15NS2	#N/A	#N/A	rp
FAUX	1-Methylguanine@1.879-rp	1-Methylguanine	165.065	1.879	C6H7N5O	63498	#N/A	rp
FAUX	7-Methylguanine@2.797-rp	7-Methylguanine	165.065	2.797	C6H7N5O	#N/A	#N/A	rp
FAUX	7H-Purine-2,6,8-triamine@1.595-rp	7H-Purine-2,6,8-triamine	165.077	1.595	C5H7N7	79213	#N/A	rp
FAUX	165.07738@1.079-rp	#N/A	165.077	1.079	C3H12N5OP	#N/A	#N/A	rp
FAUX	D-Phenylalanine@14.753-rp	D-Phenylalanine	165.079	14.753	C9H11NO2	#N/A	Metabolic pathways;Biosynthesis of secondary metabolites;Biosynthesis of plant secondary metabolites;Biosynthesis of phenylpropanoids;Phenylpropanoid biosynthesis;Biosynthesis of amino acids;2-Oxocarboxylic acid metabolism;Biosynthesis of alkaloids derived from shikimate pathway;Phenylalanine metabolism;Biosynthesis of various secondary metabolites - part 2;ABC transporters;Biosynthesis of plant …	rp
FAUX	D-Phenylalanine@8.138-rp	D-Phenylalanine	165.079	8.138	C9H11NO2	#N/A	Metabolic pathways;Biosynthesis of secondary metabolites;Biosynthesis of plant secondary metabolites;Biosynthesis of phenylpropanoids;Phenylpropanoid biosynthesis;Biosynthesis of amino acids;2-Oxocarboxylic acid metabolism;Biosynthesis of alkaloids derived from shikimate pathway;Phenylalanine metabolism;Biosynthesis of various secondary metabolites - part 2;ABC transporters;Biosynthesis of plant …	rp
FAUX	D-Phenylalanine@1.476-rp	D-Phenylalanine	165.079	1.476	C9H11NO2	#N/A	Metabolic pathways;Biosynthesis of secondary metabolites;Biosynthesis of plant secondary metabolites;Biosynthesis of phenylpropanoids;Phenylpropanoid biosynthesis;Biosynthesis of amino acids;2-Oxocarboxylic acid metabolism;Biosynthesis of alkaloids derived from shikimate pathway;Phenylalanine metabolism;Biosynthesis of various secondary metabolites - part 2;ABC transporters;Biosynthesis of plant …	rp
FAUX	D-Phenylalanine@1.09-rp	D-Phenylalanine	165.079	1.09	C9H11NO2	#N/A	Metabolic pathways;Biosynthesis of secondary metabolites;Biosynthesis of plant secondary metabolites;Biosynthesis of phenylpropanoids;Phenylpropanoid biosynthesis;Biosynthesis of amino acids;2-Oxocarboxylic acid metabolism;Biosynthesis of alkaloids derived from shikimate pathway;Phenylalanine metabolism;Biosynthesis of various secondary metabolites - part 2;ABC transporters;Biosynthesis of plant …	rp
FAUX	L-Phenylalanine@1.945-rp	L-Phenylalanine	165.079	1.945	C9H11NO2	#N/A	Metabolic pathways;Biosynthesis of secondary metabolites;Biosynthesis of plant secondary metabolites;Biosynthesis of phenylpropanoids;Phenylpropanoid biosynthesis;Biosynthesis of amino acids;2-Oxocarboxylic acid metabolism;Biosynthesis of alkaloids derived from shikimate pathway;Phenylalanine metabolism;Biosynthesis of various secondary metabolites - part 2;ABC transporters;Biosynthesis of plant …	rp
FAUX	D-Phenylalanine@3.416-rp	D-Phenylalanine	165.079	3.416	C9H11NO2	#N/A	Metabolic pathways;Biosynthesis of secondary metabolites;Biosynthesis of plant secondary metabolites;Biosynthesis of phenylpropanoids;Phenylpropanoid biosynthesis;Biosynthesis of amino acids;2-Oxocarboxylic acid metabolism;Biosynthesis of alkaloids derived from shikimate pathway;Phenylalanine metabolism;Biosynthesis of various secondary metabolites - part 2;ABC transporters;Biosynthesis of plant …	rp
FAUX	L-Phenylalanine@7.009-rp	L-Phenylalanine	165.079	7.009	C9H11NO2	#N/A	Metabolic pathways;Biosynthesis of secondary metabolites;Biosynthesis of plant secondary metabolites;Biosynthesis of phenylpropanoids;Phenylpropanoid biosynthesis;Biosynthesis of amino acids;2-Oxocarboxylic acid metabolism;Biosynthesis of alkaloids derived from shikimate pathway;Phenylalanine metabolism;Biosynthesis of various secondary metabolites - part 2;ABC transporters;Biosynthesis of plant …	rp
FAUX	D-Phenylalanine@7.524-rp	D-Phenylalanine	165.079	7.524	C9H11NO2	#N/A	Metabolic pathways;Biosynthesis of secondary metabolites;Biosynthesis of plant secondary metabolites;Biosynthesis of phenylpropanoids;Phenylpropanoid biosynthesis;Biosynthesis of amino acids;2-Oxocarboxylic acid metabolism;Biosynthesis of alkaloids derived from shikimate pathway;Phenylalanine metabolism;Biosynthesis of various secondary metabolites - part 2;ABC transporters;Biosynthesis of plant …	rp
FAUX	165.08196@1.064-rp	#N/A	165.082	1.064	#N/A	#N/A	#N/A	rp
FAUX	165.08282@1.067-rp	#N/A	165.083	1.067	#N/A	#N/A	#N/A	rp
FAUX	165.09383@1.054-rp	#N/A	165.094	1.054	#N/A	#N/A	#N/A	rp
FAUX	6-Fluoro-2-methyl-1,2,3,4-tetrahydroquinoline@1.061-rp	6-Fluoro-2-methyl-1,2,3,4-tetrahydroquinoline	165.095	1.061	C10H12FN	514365	#N/A	rp
FAUX	165.11352@1.107-rp	#N/A	165.114	1.107	#N/A	#N/A	#N/A	rp
FAUX	Hordenine@6.149-rp	Hordenine	165.116	6.149	C10H15NO	61609	Metabolic pathways;Biosynthesis of alkaloids derived from shikimate pathway;Tyrosine metabolism;Phenylalanine metabolism	rp
FAUX	Thiodiaceticacidsulfoxide@1.027-rp	Thiodiaceticacidsulfoxide	165.994	1.027	C4H6O5S	#N/A	Other	rp
FAUX	Thiodiaceticacidsulfoxide@1.43-rp	Thiodiaceticacidsulfoxide	165.994	1.43	C4H6O5S	#N/A	Other	rp
FAUX	1,3-benzodioxole-5-carboxylicacid@3.957-rp	1,3-benzodioxole-5-carboxylicacid	166.027	3.957	C8H6O4	#N/A	Metabolic pathways;Biosynthesis of secondary metabolites;Microbial metabolism in diverse environments;Degradation of aromatic compounds;Aminobenzoate degradation;ABC transporters;Other	rp
FAUX	1,3-benzodioxole-5-carboxylicacid@1.86-rp	1,3-benzodioxole-5-carboxylicacid	166.027	1.86	C8H6O4	#N/A	Metabolic pathways;Biosynthesis of secondary metabolites;Microbial metabolism in diverse environments;Degradation of aromatic compounds;Aminobenzoate degradation;ABC transporters;Other	rp
FAUX	1,3-benzodioxole-5-carboxylicacid@7.533-rp	1,3-benzodioxole-5-carboxylicacid	166.027	7.533	C8H6O4	#N/A	Metabolic pathways;Biosynthesis of secondary metabolites;Microbial metabolism in diverse environments;Degradation of aromatic compounds;Aminobenzoate degradation;ABC transporters;Other	rp
FAUX	GLYCERYL1-THIOGLYCOLATE@1.426-rp	GLYCERYL1-THIOGLYCOLATE	166.03	1.426	C5H10O4S	2298847	#N/A	rp
FAUX	3-carbamoyl-picolinicacid@5.065-rp	3-carbamoyl-picolinicacid	166.038	5.065	C7H6N2O3	8488738	#N/A	rp
FAUX	CV5601000@1.274-rp	CV5601000	166.038	1.274	C7H6N2O3	11594	#N/A	rp
FAUX	Xylonicacid@1.07-rp	Xylonicacid	166.048	1.07	C5H10O6	#N/A	Metabolic pathways;Other	rp
FAUX	1-Methylxanthine@4.6-rp	1-Methylxanthine	166.049	4.6	C6H6N4O2	#N/A	Metabolic pathways;Biosynthesis of secondary metabolites;Microbial metabolism in diverse environments;Other	rp
FAUX	1-Methylxanthine@2.44-rp	1-Methylxanthine	166.049	2.44	C6H6N4O2	#N/A	Metabolic pathways;Biosynthesis of secondary metabolites;Microbial metabolism in diverse environments;Other	rp
FAUX	1-Methylxanthine@3.523-rp	1-Methylxanthine	166.049	3.523	C6H6N4O2	#N/A	Metabolic pathways;Biosynthesis of secondary metabolites;Microbial metabolism in diverse environments;Other	rp
FAUX	1-Methylxanthine@3.357-rp	1-Methylxanthine	166.049	3.357	C6H6N4O2	#N/A	Metabolic pathways;Biosynthesis of secondary metabolites;Microbial metabolism in diverse environments;Other	rp
FAUX	1-Methylxanthine@5.403-rp	1-Methylxanthine	166.049	5.403	C6H6N4O2	#N/A	Metabolic pathways;Biosynthesis of secondary metabolites;Microbial metabolism in diverse environments;Other	rp
FAUX	2-Phenoxypropanoicacid@8.828-rp	2-Phenoxypropanoicacid	166.063	8.828	C9H10O3	13069	Metabolic pathways;Biosynthesis of secondary metabolites;Microbial metabolism in diverse environments;Degradation of aromatic compounds;Phenylpropanoid biosynthesis;Tyrosine metabolism;Phenylalanine metabolism;Other	rp
FAUX	3-(2-Hydroxyphenyl)propanoate@10.408-rp	3-(2-Hydroxyphenyl)propanoate	166.063	10.408	C9H10O3	#N/A	Metabolic pathways;Biosynthesis of secondary metabolites;Microbial metabolism in diverse environments;Degradation of aromatic compounds;Phenylpropanoid biosynthesis;Tyrosine metabolism;Phenylalanine metabolism;Other	rp
FAUX	DL-?-Methoxyphenylaceticacid@7.838-rp	DL-?-Methoxyphenylaceticacid	166.063	7.838	C9H10O3	#N/A	Metabolic pathways;Biosynthesis of secondary metabolites;Microbial metabolism in diverse environments;Degradation of aromatic compounds;Phenylpropanoid biosynthesis;Tyrosine metabolism;Phenylalanine metabolism;Other	rp
FAUX	2-Phenoxypropanoicacid@8.219-rp	2-Phenoxypropanoicacid	166.063	8.219	C9H10O3	13069	Metabolic pathways;Biosynthesis of secondary metabolites;Microbial metabolism in diverse environments;Degradation of aromatic compounds;Phenylpropanoid biosynthesis;Tyrosine metabolism;Phenylalanine metabolism;Other	rp
FAUX	3-Phenyllacticacid@7.069-rp	3-Phenyllacticacid	166.063	7.069	C9H10O3	#N/A	Metabolic pathways;Biosynthesis of secondary metabolites;Microbial metabolism in diverse environments;Degradation of aromatic compounds;Phenylpropanoid biosynthesis;Tyrosine metabolism;Phenylalanine metabolism;Other	rp
FAUX	3-(2-Hydroxyphenyl)propanoate@6.322-rp	3-(2-Hydroxyphenyl)propanoate	166.063	6.322	C9H10O3	#N/A	Metabolic pathways;Biosynthesis of secondary metabolites;Microbial metabolism in diverse environments;Degradation of aromatic compounds;Phenylpropanoid biosynthesis;Tyrosine metabolism;Phenylalanine metabolism;Other	rp
FAUX	3,5,6-trimethylpyrazinecarboxylicacid@5.084-rp	3,5,6-trimethylpyrazinecarboxylicacid	166.074	5.084	C8H10N2O2	21375553	#N/A	rp
FAUX	N,N-DIMETHYL-4-NITROANILINE@1.866-rp	N,N-DIMETHYL-4-NITROANILINE	166.074	1.866	C8H10N2O2	7210	#N/A	rp
FAUX	N,N-DIMETHYL-4-NITROANILINE@1.492-rp	N,N-DIMETHYL-4-NITROANILINE	166.074	1.492	C8H10N2O2	7210	#N/A	rp
FAUX	5-Cyclobutyl-2,4(1H,3H)-pyrimidinedione@4.666-rp	5-Cyclobutyl-2,4(1H,3H)-pyrimidinedione	166.075	4.666	C8H10N2O2	121038	#N/A	rp
FAUX	1-Deoxy-L-mannitol@1.115-rp	1-Deoxy-L-mannitol	166.084	1.115	C6H14O5	392801	#N/A	rp
FAUX	N-((4-AMINO-2-METHYL-5-PYRIMIDINYL)METHYL)FORMAMIDE@1.044-rp	N-((4-AMINO-2-METHYL-5-PYRIMIDINYL)METHYL)FORMAMIDE	166.085	1.044	C7H10N4O	519143	Metabolic pathways;ABC transporters;Other	rp
FAUX	166.09884@8.285-rp	#N/A	166.099	8.285	C4H15N4OP	#N/A	Metabolic pathways;Biosynthesis of secondary metabolites;Other	rp
FAUX	(+)-Bornane-2-5-dione@9.746-rp	(+)-Bornane-2-5-dione	166.099	9.746	C10H14O2	#N/A	Metabolic pathways;Biosynthesis of secondary metabolites;Other	rp
FAUX	6-Pentyl-2H-pyran-2-one@14.306-rp	6-Pentyl-2H-pyran-2-one	166.099	14.306	C10H14O2	#N/A	Metabolic pathways;Biosynthesis of secondary metabolites;Other	rp
FAUX	(+)-Bornane-2-5-dione@8.427-rp	(+)-Bornane-2-5-dione	166.099	8.427	C10H14O2	#N/A	Metabolic pathways;Biosynthesis of secondary metabolites;Other	rp
FAUX	(+)-Bornane-2-5-dione@6.774-rp	(+)-Bornane-2-5-dione	166.1	6.774	C10H14O2	#N/A	Metabolic pathways;Biosynthesis of secondary metabolites;Other	rp
FAUX	(+)-Bornane-2-5-dione@8.299-rp	(+)-Bornane-2-5-dione	166.1	8.299	C10H14O2	#N/A	Metabolic pathways;Biosynthesis of secondary metabolites;Other	rp
FAUX	N-Propyl-1,4-dihydro-3-pyridinecarboxamide@1.459-rp	N-Propyl-1,4-dihydro-3-pyridinecarboxamide	166.11	1.459	C9H14N2O	9237673	#N/A	rp
FAUX	2,6,6-Trimethylbicyclo(3.1.1)heptane-3-carbaldehyde@18.566-rp	2,6,6-Trimethylbicyclo(3.1.1)heptane-3-carbaldehyde	166.136	18.566	C11H18O	97473	#N/A	rp
FAUX	3422@17.782-rp	3422	166.136	17.782	C11H18O	4519025	#N/A	rp
FAUX	3422@12.863-rp	3422	166.136	12.863	C11H18O	4519025	#N/A	rp
FAUX	3422@13.231-rp	3422	166.136	13.231	C11H18O	4519025	#N/A	rp
FAUX	1-Adamantanemethanol@8.099-rp	1-Adamantanemethanol	166.136	8.099	C11H18O	58119	#N/A	rp
FAUX	166.56222@1.217-rp	#N/A	166.562	1.217	#N/A	#N/A	#N/A	rp
FAUX	166.56619@4.712-rp	#N/A	166.566	4.712	#N/A	#N/A	#N/A	rp
FAUX	166.59014@3.894-rp	#N/A	166.59	3.894	#N/A	#N/A	#N/A	rp
FAUX	2-Mercaptobenzothiazole@14.183-rp	2-Mercaptobenzothiazole	166.986	14.183	C7H5NS2	608157	#N/A	rp
FAUX	2-Mercaptobenzothiazole@16.675-rp	2-Mercaptobenzothiazole	166.986	16.675	C7H5NS2	608157	#N/A	rp
FAUX	2-Mercaptobenzothiazole@10.081-rp	2-Mercaptobenzothiazole	166.987	10.081	C7H5NS2	608157	#N/A	rp
FAUX	166.99124@1.198-rp	#N/A	166.991	1.198	C2H6N3O2PS	#N/A	#N/A	rp
FAUX	Dipicolinicacid@5.068-rp	Dipicolinicacid	167.022	5.068	C7H5NO4	9940	Metabolic pathways;Microbial metabolism in diverse environments;Biosynthesis of plant secondary metabolites;Tryptophan metabolism;Aminobenzoate degradation;Other	rp
FAUX	Dipicolinicacid@1.116-rp	Dipicolinicacid	167.022	1.116	C7H5NO4	9940	Metabolic pathways;Microbial metabolism in diverse environments;Biosynthesis of plant secondary metabolites;Tryptophan metabolism;Aminobenzoate degradation;Other	rp
FAUX	Dipicolinicacid@2.618-rp	Dipicolinicacid	167.022	2.618	C7H5NO4	9940	Metabolic pathways;Microbial metabolism in diverse environments;Biosynthesis of plant secondary metabolites;Tryptophan metabolism;Aminobenzoate degradation;Other	rp
FAUX	4-Morpholinesulfonicacid@1.292-rp	4-Morpholinesulfonicacid	167.025	1.292	C4H9NO4S	133447	#N/A	rp
FAUX	4-Morpholinesulfonicacid@1.432-rp	4-Morpholinesulfonicacid	167.025	1.432	C4H9NO4S	133447	#N/A	rp
FAUX	Demethylphosphinothricin@1.193-rp	Demethylphosphinothricin	167.035	1.193	C4H10NO4P	3687	Biosynthesis of secondary metabolites;Other	rp
FAUX	7,8-dihydro-8-oxoguanine@1.577-rp	7,8-dihydro-8-oxoguanine	167.044	1.577	C5H5N5O2	58661	#N/A	rp
FAUX	3-Hydroxy-4-methylanthranilate@3.441-rp	3-Hydroxy-4-methylanthranilate	167.058	3.441	C8H9NO3	#N/A	Metabolic pathways;Biosynthesis of secondary metabolites;Microbial metabolism in diverse environments;Tryptophan metabolism;Other	rp
FAUX	3-Hydroxy-4-methylanthranilate@6.105-rp	3-Hydroxy-4-methylanthranilate	167.058	6.105	C8H9NO3	#N/A	Metabolic pathways;Biosynthesis of secondary metabolites;Microbial metabolism in diverse environments;Tryptophan metabolism;Other	rp
FAUX	3-Hydroxy-4-methylanthranilate@1.225-rp	3-Hydroxy-4-methylanthranilate	167.058	1.225	C8H9NO3	#N/A	Metabolic pathways;Biosynthesis of secondary metabolites;Microbial metabolism in diverse environments;Tryptophan metabolism;Other	rp
FAUX	3-Hydroxy-4-methylanthranilate@4.392-rp	3-Hydroxy-4-methylanthranilate	167.058	4.392	C8H9NO3	#N/A	Metabolic pathways;Biosynthesis of secondary metabolites;Microbial metabolism in diverse environments;Tryptophan metabolism;Other	rp
FAUX	3-Hydroxy-4-methylanthranilate@1.484-rp	3-Hydroxy-4-methylanthranilate	167.058	1.484	C8H9NO3	#N/A	Metabolic pathways;Biosynthesis of secondary metabolites;Microbial metabolism in diverse environments;Tryptophan metabolism;Other	rp
FAUX	3-Hydroxy-4-methylanthranilate@4.842-rp	3-Hydroxy-4-methylanthranilate	167.059	4.842	C8H9NO3	#N/A	Metabolic pathways;Biosynthesis of secondary metabolites;Microbial metabolism in diverse environments;Tryptophan metabolism;Other	rp
FAUX	167.06177@1.07-rp	#N/A	167.062	1.07	C7H10N3P	#N/A	#N/A	rp
FAUX	2,4-diamino-6-nitrotoluene@0.935-rp	2,4-diamino-6-nitrotoluene	167.07	0.935	C7H9N3O2	#N/A	Microbial metabolism in diverse environments;Other	rp
FAUX	2,4-diamino-6-nitrotoluene@1.019-rp	2,4-diamino-6-nitrotoluene	167.07	1.019	C7H9N3O2	#N/A	Microbial metabolism in diverse environments;Other	rp
FAUX	2,4-diamino-6-nitrotoluene@1.938-rp	2,4-diamino-6-nitrotoluene	167.07	1.938	C7H9N3O2	#N/A	Microbial metabolism in diverse environments;Other	rp
FAUX	167.09374@1.503-rp	#N/A	167.094	1.503	#N/A	#N/A	Metabolic pathways;Biosynthesis of alkaloids derived from shikimate pathway;Tyrosine metabolism;Other	rp
FAUX	3-Methoxytyramine@5.254-rp	3-Methoxytyramine	167.095	5.254	C9H13NO2	1606	Metabolic pathways;Biosynthesis of alkaloids derived from shikimate pathway;Tyrosine metabolism;Other	rp
FAUX	3-Methoxytyramine@1.508-rp	3-Methoxytyramine	167.095	1.508	C9H13NO2	1606	Metabolic pathways;Biosynthesis of alkaloids derived from shikimate pathway;Tyrosine metabolism;Other	rp
FAUX	167.10253@18.493-rp	#N/A	167.103	18.493	#N/A	#N/A	#N/A	rp
FAUX	167.10419@1.04-rp	#N/A	167.104	1.04	#N/A	#N/A	#N/A	rp
FAUX	167.10438@1.484-rp	#N/A	167.104	1.484	#N/A	#N/A	#N/A	rp
FAUX	2-(dimethylamino)-5,6-dimethylpyrimidin-4-ol@1.039-rp	2-(dimethylamino)-5,6-dimethylpyrimidin-4-ol	167.106	1.039	C8H13N3O	84165	#N/A	rp
FAUX	2-Amino-1-(1H-imidazol-5-yl)-3-pentanone@1.467-rp	2-Amino-1-(1H-imidazol-5-yl)-3-pentanone	167.106	1.467	C8H13N3O	11574757	#N/A	rp
FAUX	167.5742@1.484-rp	#N/A	167.574	1.484	#N/A	#N/A	#N/A	rp
FAUX	167.57976@1.421-rp	#N/A	167.58	1.421	#N/A	#N/A	#N/A	rp
FAUX	167.98487@1.753-rp	#N/A	167.985	1.753	C2H4N2O5S	#N/A	#N/A	rp
FAUX	168.00956@1.183-rp	#N/A	168.01	1.183	C4H8O5S	#N/A	#N/A	rp
FAUX	3-Sulfamoylalanine@1.116-rp	3-Sulfamoylalanine	168.021	1.116	C3H8N2O4S	255670	#N/A	rp
FAUX	3-Sulfamoylalanine@1.409-rp	3-Sulfamoylalanine	168.021	1.409	C3H8N2O4S	255670	#N/A	rp
FAUX	Uricacid@1.804-rp	Uricacid	168.029	1.804	C5H4N4O3	#N/A	Metabolic pathways;Microbial metabolism in diverse environments;Bile secretion;Other	rp
FAUX	Uricacid@1.429-rp	Uricacid	168.029	1.429	C5H4N4O3	#N/A	Metabolic pathways;Microbial metabolism in diverse environments;Bile secretion;Other	rp
FAUX	168.02881@1.281-rp	#N/A	168.029	1.281	C5H14P2S	#N/A	Metabolic pathways;Microbial metabolism in diverse environments;Bile secretion;Other	rp
FAUX	3-4-Dihydroxymandelaldehyde@7.143-rp	3-4-Dihydroxymandelaldehyde	168.042	7.143	C8H8O4	#N/A	Metabolic pathways;Biosynthesis of secondary metabolites;Microbial metabolism in diverse environments;Degradation of aromatic compounds;Tyrosine metabolism;Phenylalanine metabolism;Ubiquinone and other terpenoid-quinone biosynthesis;Aminobenzoate degradation;Other	rp
FAUX	Vanillicacid@1.158-rp	Vanillicacid	168.042	1.158	C8H8O4	8155	Metabolic pathways;Biosynthesis of secondary metabolites;Microbial metabolism in diverse environments;Degradation of aromatic compounds;Tyrosine metabolism;Phenylalanine metabolism;Ubiquinone and other terpenoid-quinone biosynthesis;Aminobenzoate degradation;Other	rp
FAUX	3-4-Dihydroxymandelaldehyde@3.953-rp	3-4-Dihydroxymandelaldehyde	168.042	3.953	C8H8O4	#N/A	Metabolic pathways;Biosynthesis of secondary metabolites;Microbial metabolism in diverse environments;Degradation of aromatic compounds;Tyrosine metabolism;Phenylalanine metabolism;Ubiquinone and other terpenoid-quinone biosynthesis;Aminobenzoate degradation;Other	rp
FAUX	3-4-Dihydroxymandelaldehyde@7.716-rp	3-4-Dihydroxymandelaldehyde	168.042	7.716	C8H8O4	#N/A	Metabolic pathways;Biosynthesis of secondary metabolites;Microbial metabolism in diverse environments;Degradation of aromatic compounds;Tyrosine metabolism;Phenylalanine metabolism;Ubiquinone and other terpenoid-quinone biosynthesis;Aminobenzoate degradation;Other	rp
FAUX	3-4-Dihydroxymandelaldehyde@9.541-rp	3-4-Dihydroxymandelaldehyde	168.043	9.541	C8H8O4	#N/A	Metabolic pathways;Biosynthesis of secondary metabolites;Microbial metabolism in diverse environments;Degradation of aromatic compounds;Tyrosine metabolism;Phenylalanine metabolism;Ubiquinone and other terpenoid-quinone biosynthesis;Aminobenzoate degradation;Other	rp
FAUX	3-4-Dihydroxymandelaldehyde@4.299-rp	3-4-Dihydroxymandelaldehyde	168.043	4.299	C8H8O4	#N/A	Metabolic pathways;Biosynthesis of secondary metabolites;Microbial metabolism in diverse environments;Degradation of aromatic compounds;Tyrosine metabolism;Phenylalanine metabolism;Ubiquinone and other terpenoid-quinone biosynthesis;Aminobenzoate degradation;Other	rp
FAUX	Vanillicacid@1.468-rp	Vanillicacid	168.043	1.468	C8H8O4	8155	Metabolic pathways;Biosynthesis of secondary metabolites;Microbial metabolism in diverse environments;Degradation of aromatic compounds;Tyrosine metabolism;Phenylalanine metabolism;Ubiquinone and other terpenoid-quinone biosynthesis;Aminobenzoate degradation;Other	rp
FAUX	3-4-Dihydroxymandelaldehyde@6.05-rp	3-4-Dihydroxymandelaldehyde	168.043	6.05	C8H8O4	#N/A	Metabolic pathways;Biosynthesis of secondary metabolites;Microbial metabolism in diverse environments;Degradation of aromatic compounds;Tyrosine metabolism;Phenylalanine metabolism;Ubiquinone and other terpenoid-quinone biosynthesis;Aminobenzoate degradation;Other	rp
FAUX	Vanillicacid@1.873-rp	Vanillicacid	168.043	1.873	C8H8O4	8155	Metabolic pathways;Biosynthesis of secondary metabolites;Microbial metabolism in diverse environments;Degradation of aromatic compounds;Tyrosine metabolism;Phenylalanine metabolism;Ubiquinone and other terpenoid-quinone biosynthesis;Aminobenzoate degradation;Other	rp
FAUX	3-4-Dihydroxymandelaldehyde@6.864-rp	3-4-Dihydroxymandelaldehyde	168.043	6.864	C8H8O4	#N/A	Metabolic pathways;Biosynthesis of secondary metabolites;Microbial metabolism in diverse environments;Degradation of aromatic compounds;Tyrosine metabolism;Phenylalanine metabolism;Ubiquinone and other terpenoid-quinone biosynthesis;Aminobenzoate degradation;Other	rp
FAUX	3-4-Dihydroxymandelaldehyde@7.487-rp	3-4-Dihydroxymandelaldehyde	168.043	7.487	C8H8O4	#N/A	Metabolic pathways;Biosynthesis of secondary metabolites;Microbial metabolism in diverse environments;Degradation of aromatic compounds;Tyrosine metabolism;Phenylalanine metabolism;Ubiquinone and other terpenoid-quinone biosynthesis;Aminobenzoate degradation;Other	rp
FAUX	4-Hydroxybutylmethanesulfonate@1.5-rp	4-Hydroxybutylmethanesulfonate	168.046	1.5	C5H12O4S	35903	#N/A	rp
FAUX	168.05122@1.031-rp	#N/A	168.051	1.031	C3H4N8O	#N/A	#N/A	rp
FAUX	4-Nitro-o-anisidine@2.096-rp	4-Nitro-o-anisidine	168.054	2.096	C7H8N2O3	7060	#N/A	rp
FAUX	4-Nitro-o-anisidine@1.165-rp	4-Nitro-o-anisidine	168.054	1.165	C7H8N2O3	7060	#N/A	rp
FAUX	4-Nitro-o-anisidine@1.471-rp	4-Nitro-o-anisidine	168.054	1.471	C7H8N2O3	7060	#N/A	rp
FAUX	4-Nitro-o-anisidine@6.946-rp	4-Nitro-o-anisidine	168.054	6.946	C7H8N2O3	7060	#N/A	rp
FAUX	N-cyclopropylammelide@2.367-rp	N-cyclopropylammelide	168.065	2.367	C6H8N4O2	515334	Microbial metabolism in diverse environments;Other	rp
FAUX	1-3-5-trimethoxybenzene@6.14-rp	1-3-5-trimethoxybenzene	168.079	6.14	C9H12O3	#N/A	Metabolic pathways;Other	rp
FAUX	1-3-5-trimethoxybenzene@10.662-rp	1-3-5-trimethoxybenzene	168.079	10.662	C9H12O3	#N/A	Metabolic pathways;Other	rp
FAUX	1-3-5-trimethoxybenzene@5.834-rp	1-3-5-trimethoxybenzene	168.079	5.834	C9H12O3	#N/A	Metabolic pathways;Other	rp
FAUX	168.0876@0.977-rp	#N/A	168.088	0.977	C4H8N8	#N/A	#N/A	rp
FAUX	168.08899@1.473-rp	#N/A	168.089	1.473	#N/A	#N/A	Metabolic pathways;Microbial metabolism in diverse environments;Other	rp
FAUX	Pyridoxamine;2-Methyl-4-aminomethyl-5-hydroxymethyl-3-Pyridinol@1.47-rp	Pyridoxamine;2-Methyl-4-aminomethyl-5-hydroxymethyl-3-Pyridinol	168.09	1.47	C8H12N2O2	#N/A	Metabolic pathways;Microbial metabolism in diverse environments;Other	rp
FAUX	Pyridoxamine;2-Methyl-4-aminomethyl-5-hydroxymethyl-3-Pyridinol@1.043-rp	Pyridoxamine;2-Methyl-4-aminomethyl-5-hydroxymethyl-3-Pyridinol	168.09	1.043	C8H12N2O2	#N/A	Metabolic pathways;Microbial metabolism in diverse environments;Other	rp
FAUX	Pyridoxamine;2-Methyl-4-aminomethyl-5-hydroxymethyl-3-Pyridinol@4.064-rp	Pyridoxamine;2-Methyl-4-aminomethyl-5-hydroxymethyl-3-Pyridinol	168.09	4.064	C8H12N2O2	#N/A	Metabolic pathways;Microbial metabolism in diverse environments;Other	rp
FAUX	Pyridoxamine;2-Methyl-4-aminomethyl-5-hydroxymethyl-3-Pyridinol@2.448-rp	Pyridoxamine;2-Methyl-4-aminomethyl-5-hydroxymethyl-3-Pyridinol	168.09	2.448	C8H12N2O2	#N/A	Metabolic pathways;Microbial metabolism in diverse environments;Other	rp
FAUX	Pyridoxamine;2-Methyl-4-aminomethyl-5-hydroxymethyl-3-Pyridinol@5.081-rp	Pyridoxamine;2-Methyl-4-aminomethyl-5-hydroxymethyl-3-Pyridinol	168.09	5.081	C8H12N2O2	#N/A	Metabolic pathways;Microbial metabolism in diverse environments;Other	rp
FAUX	Pyridoxamine;2-Methyl-4-aminomethyl-5-hydroxymethyl-3-Pyridinol@2.653-rp	Pyridoxamine;2-Methyl-4-aminomethyl-5-hydroxymethyl-3-Pyridinol	168.09	2.653	C8H12N2O2	#N/A	Metabolic pathways;Microbial metabolism in diverse environments;Other	rp
FAUX	(+)-exo-5-Hydroxycamphor@17.768-rp	(+)-exo-5-Hydroxycamphor	168.115	17.768	C10H16O2	#N/A	Metabolic pathways;Biosynthesis of secondary metabolites;Degradation of aromatic compounds;Other	rp
FAUX	(+)-exo-5-Hydroxycamphor@15.056-rp	(+)-exo-5-Hydroxycamphor	168.115	15.056	C10H16O2	#N/A	Metabolic pathways;Biosynthesis of secondary metabolites;Degradation of aromatic compounds;Other	rp
FAUX	(+)-exo-5-Hydroxycamphor@10.653-rp	(+)-exo-5-Hydroxycamphor	168.115	10.653	C10H16O2	#N/A	Metabolic pathways;Biosynthesis of secondary metabolites;Degradation of aromatic compounds;Other	rp
FAUX	168.58648@1.472-rp	#N/A	168.586	1.472	#N/A	#N/A	#N/A	rp
FAUX	168.5876@1.172-rp	#N/A	168.588	1.172	#N/A	#N/A	#N/A	rp
FAUX	168.58762@1.475-rp	#N/A	168.588	1.475	#N/A	#N/A	#N/A	rp
FAUX	Cysteicacid@1.1-rp	Cysteicacid	169.005	1.1	C3H7NO5S	#N/A	Metabolic pathways;Other	rp
FAUX	169.0213@1.378-rp	#N/A	169.021	1.378	C7H9NP2	#N/A	#N/A	rp
FAUX	4-amino-2-(trifluoromethyl)-2-butenoicacid@1.036-rp	4-amino-2-(trifluoromethyl)-2-butenoicacid	169.035	1.036	C5H6F3NO2	9808066	#N/A	rp
FAUX	2-Furoylglycine;Pyromucuricacid@1.425-rp	2-Furoylglycine;Pyromucuricacid	169.038	1.425	C7H7NO4	#N/A	Biosynthesis of secondary metabolites;Microbial metabolism in diverse environments;Degradation of aromatic compounds;Other	rp
FAUX	2-Furoylglycine;Pyromucuricacid@1.326-rp	2-Furoylglycine;Pyromucuricacid	169.038	1.326	C7H7NO4	#N/A	Biosynthesis of secondary metabolites;Microbial metabolism in diverse environments;Degradation of aromatic compounds;Other	rp
FAUX	2-Furoylglycine;Pyromucuricacid@1.51-rp	2-Furoylglycine;Pyromucuricacid	169.038	1.51	C7H7NO4	#N/A	Biosynthesis of secondary metabolites;Microbial metabolism in diverse environments;Degradation of aromatic compounds;Other	rp
FAUX	(R)-2,3,4,5-tetrahydrodipicolinate@1.494-rp	(R)-2,3,4,5-tetrahydrodipicolinate	169.039	1.494	C7H7NO4	4574219	#N/A	rp
FAUX	1-Amino-4-hydroxy-2-butanesulfonicacid@1.122-rp	1-Amino-4-hydroxy-2-butanesulfonicacid	169.041	1.122	C4H11NO4S	32787740	#N/A	rp
FAUX	2-Amino-5,6-dihydro-3H-purine-6-thiol@1.133-rp	2-Amino-5,6-dihydro-3H-purine-6-thiol	169.043	1.133	C5H7N5S	19240450	#N/A	rp
FAUX	2-Nitro-6,7-dihydro-5H-imidazo[2,1-b][1,3]oxazine@1.464-rp	2-Nitro-6,7-dihydro-5H-imidazo[2,1-b][1,3]oxazine	169.049	1.464	C6H7N3O3	419070	#N/A	rp
FAUX	Phosphodimethylethanolamine@1.047-rp	Phosphodimethylethanolamine	169.051	1.047	C4H12NO4P	#N/A	Other	rp
FAUX	1-Naphthylisocyanate@9.635-rp	1-Naphthylisocyanate	169.053	9.635	C11H7NO	59958	#N/A	rp
FAUX	169.05814@3.439-rp	#N/A	169.058	3.439	C4H11NO6	#N/A	#N/A	rp
FAUX	2,6-Diamino-4-oxo-5-formamidopyrimidine@1.25-rp	2,6-Diamino-4-oxo-5-formamidopyrimidine	169.06	1.25	C5H7N5O2	158860	#N/A	rp
FAUX	169.07294@1.479-rp	#N/A	169.073	1.479	#N/A	#N/A	Metabolic pathways;Microbial metabolism in diverse environments;Tyrosine metabolism;Other	rp
FAUX	Norepinephrine(Noradrenaline)@1.934-rp	Norepinephrine(Noradrenaline)	169.074	1.934	C8H11NO3	#N/A	Metabolic pathways;Microbial metabolism in diverse environments;Tyrosine metabolism;Other	rp
FAUX	Norepinephrine(Noradrenaline)@1.117-rp	Norepinephrine(Noradrenaline)	169.074	1.117	C8H11NO3	#N/A	Metabolic pathways;Microbial metabolism in diverse environments;Tyrosine metabolism;Other	rp
FAUX	Norepinephrine(Noradrenaline)@1.47-rp	Norepinephrine(Noradrenaline)	169.074	1.47	C8H11NO3	#N/A	Metabolic pathways;Microbial metabolism in diverse environments;Tyrosine metabolism;Other	rp
FAUX	Norepinephrine(Noradrenaline)@5.788-rp	Norepinephrine(Noradrenaline)	169.074	5.788	C8H11NO3	#N/A	Metabolic pathways;Microbial metabolism in diverse environments;Tyrosine metabolism;Other	rp
FAUX	Norepinephrine(Noradrenaline)@3.734-rp	Norepinephrine(Noradrenaline)	169.074	3.734	C8H11NO3	#N/A	Metabolic pathways;Microbial metabolism in diverse environments;Tyrosine metabolism;Other	rp
FAUX	169.08361@1.203-rp	#N/A	169.084	1.203	#N/A	#N/A	#N/A	rp
FAUX	1-Methylhistidine@1.035-rp	1-Methylhistidine	169.085	1.035	C7H11N3O2	#N/A	Metabolic pathways;Other	rp
FAUX	1-Methylhistidine@1.175-rp	1-Methylhistidine	169.085	1.175	C7H11N3O2	#N/A	Metabolic pathways;Other	rp
FAUX	Aceclidine@7.317-rp	Aceclidine	169.111	7.317	C9H15NO2	1902	#N/A	rp
FAUX	169.53723@4.168-rp	#N/A	169.537	4.168	#N/A	#N/A	#N/A	rp
FAUX	169.5772@1.054-rp	#N/A	169.577	1.054	#N/A	#N/A	#N/A	rp
FAUX	169.58987@1.082-rp	#N/A	169.59	1.082	#N/A	#N/A	#N/A	rp
FAUX	(2R)-3-Sulfolactate@1.083-rp	(2R)-3-Sulfolactate	169.989	1.083	C3H6O6S	#N/A	Metabolic pathways;Microbial metabolism in diverse environments;Other	rp
FAUX	Thiourocanicacid@4.069-rp	Thiourocanicacid	170.015	4.069	C6H6N2O2S	4447055	Metabolic pathways;Other	rp
FAUX	Gallicacid@2.244-rp	Gallicacid	170.022	2.244	C7H6O5	#N/A	Microbial metabolism in diverse environments;Biosynthesis of phenylpropanoids;Aminobenzoate degradation	rp
FAUX	Gallicacid@4.604-rp	Gallicacid	170.022	4.604	C7H6O5	#N/A	Microbial metabolism in diverse environments;Biosynthesis of phenylpropanoids;Aminobenzoate degradation	rp
FAUX	Gallicacid@8.505-rp	Gallicacid	170.022	8.505	C7H6O5	#N/A	Microbial metabolism in diverse environments;Biosynthesis of phenylpropanoids;Aminobenzoate degradation	rp
FAUX	170.0252@1.143-rp	#N/A	170.025	1.143	C4H10O5S	#N/A	#N/A	rp
FAUX	170.02521@1.45-rp	#N/A	170.025	1.45	C4H10O5S	#N/A	#N/A	rp
FAUX	(2,4-Dioxo-1,2,3,4-tetrahydro-5-pyrimidinyl)aceticacid@1.66-rp	(2,4-Dioxo-1,2,3,4-tetrahydro-5-pyrimidinyl)aceticacid	170.033	1.66	C6H6N2O4	263182	#N/A	rp
FAUX	3-4-Dihydroxyphenylethyleneglycol@2.05-rp	3-4-Dihydroxyphenylethyleneglycol	170.058	2.05	C8H10O4	#N/A	Metabolic pathways;Microbial metabolism in diverse environments;Degradation of aromatic compounds;Tyrosine metabolism;Other	rp
FAUX	3-4-Dihydroxyphenylethyleneglycol@6.277-rp	3-4-Dihydroxyphenylethyleneglycol	170.058	6.277	C8H10O4	#N/A	Metabolic pathways;Microbial metabolism in diverse environments;Degradation of aromatic compounds;Tyrosine metabolism;Other	rp
FAUX	3-4-Dihydroxyphenylethyleneglycol@2.669-rp	3-4-Dihydroxyphenylethyleneglycol	170.058	2.669	C8H10O4	#N/A	Metabolic pathways;Microbial metabolism in diverse environments;Degradation of aromatic compounds;Tyrosine metabolism;Other	rp
FAUX	1,5,5-Trimethyl-2,4,6(1H,3H,5H)-pyrimidinetrione@1.612-rp	1,5,5-Trimethyl-2,4,6(1H,3H,5H)-pyrimidinetrione	170.069	1.612	C7H10N2O3	201499	#N/A	rp
FAUX	Ethylacetamidocyanoacetate@2.789-rp	Ethylacetamidocyanoacetate	170.069	2.789	C7H10N2O3	86118	#N/A	rp
FAUX	1,5,5-Trimethyl-2,4,6(1H,3H,5H)-pyrimidinetrione@1.141-rp	1,5,5-Trimethyl-2,4,6(1H,3H,5H)-pyrimidinetrione	170.069	1.141	C7H10N2O3	201499	#N/A	rp
FAUX	1,5,5-Trimethyl-2,4,6(1H,3H,5H)-pyrimidinetrione@1.667-rp	1,5,5-Trimethyl-2,4,6(1H,3H,5H)-pyrimidinetrione	170.069	1.667	C7H10N2O3	201499	#N/A	rp
FAUX	4-(Hydrazinomethyl)-1,2,3-benzenetriol@1.466-rp	4-(Hydrazinomethyl)-1,2,3-benzenetriol	170.07	1.466	C7H10N2O3	164202	#N/A	rp
FAUX	4-(Hydrazinomethyl)-1,2,3-benzenetriol@1.356-rp	4-(Hydrazinomethyl)-1,2,3-benzenetriol	170.07	1.356	C7H10N2O3	164202	#N/A	rp
FAUX	Ethyl2-oxocyclohexanecarboxylate@9.902-rp	Ethyl2-oxocyclohexanecarboxylate	170.094	9.902	C9H14O3	86237	#N/A	rp
FAUX	170.10428@1.482-rp	#N/A	170.104	1.482	#N/A	#N/A	#N/A	rp
FAUX	1,4-Diazabicyclo[3.2.2]nonane-4-carboxylicacid@1.233-rp	1,4-Diazabicyclo[3.2.2]nonane-4-carboxylicacid	170.106	1.233	C8H14N2O2	16323112	#N/A	rp
FAUX	1,4-Diazabicyclo[3.2.2]nonane-4-carboxylicacid@1.083-rp	1,4-Diazabicyclo[3.2.2]nonane-4-carboxylicacid	170.106	1.083	C8H14N2O2	16323112	#N/A	rp
FAUX	Etiracetam@1.468-rp	Etiracetam	170.106	1.468	C8H14N2O2	53863	#N/A	rp
FAUX	1-Acetyl-N-methyl-L-prolinamide@1.852-rp	1-Acetyl-N-methyl-L-prolinamide	170.106	1.852	C8H14N2O2	167959	#N/A	rp
FAUX	Limonene-1-2-diol@18.556-rp	Limonene-1-2-diol	170.13	18.556	C10H18O2	#N/A	Metabolic pathways;Biosynthesis of secondary metabolites;Biosynthesis of alkaloids derived from shikimate pathway;Biosynthesis of various secondary metabolites - part 2;Other	rp
FAUX	Limonene-1-2-diol@17.774-rp	Limonene-1-2-diol	170.13	17.774	C10H18O2	#N/A	Metabolic pathways;Biosynthesis of secondary metabolites;Biosynthesis of alkaloids derived from shikimate pathway;Biosynthesis of various secondary metabolites - part 2;Other	rp
FAUX	Limonene-1-2-diol@11.898-rp	Limonene-1-2-diol	170.131	11.898	C10H18O2	#N/A	Metabolic pathways;Biosynthesis of secondary metabolites;Biosynthesis of alkaloids derived from shikimate pathway;Biosynthesis of various secondary metabolites - part 2;Other	rp
FAUX	MFCD00019723@1.471-rp	MFCD00019723	170.142	1.471	C9H18N2O	259825	#N/A	rp
FAUX	DimethylaminopropylMethacrylamide@1.019-rp	DimethylaminopropylMethacrylamide	170.142	1.019	C9H18N2O	71217	#N/A	rp
FAUX	170.52693@1.757-rp	#N/A	170.527	1.757	#N/A	#N/A	#N/A	rp
FAUX	170.55761@8.463-rp	#N/A	170.558	8.463	#N/A	#N/A	#N/A	rp
FAUX	170.99674@1.422-rp	#N/A	170.997	1.422	#N/A	#N/A	#N/A	rp
FAUX	XT5075000@7.672-rp	XT5075000	171.036	7.672	C7H9NO2S	6033	#N/A	rp
FAUX	171.03832@1.268-rp	#N/A	171.038	1.268	C3H9NO7	#N/A	#N/A	rp
FAUX	171.05101@1.012-rp	#N/A	171.051	1.012	C3H5N7O2	#N/A	#N/A	rp
FAUX	2-3-4-5-Tetrahydrodipicolinate@1.608-rp	2-3-4-5-Tetrahydrodipicolinate	171.053	1.608	C7H9NO4	#N/A	Metabolic pathways;Biosynthesis of secondary metabolites;Microbial metabolism in diverse environments;Biosynthesis of amino acids;Other	rp
FAUX	2-3-4-5-Tetrahydrodipicolinate@1.471-rp	2-3-4-5-Tetrahydrodipicolinate	171.053	1.471	C7H9NO4	#N/A	Metabolic pathways;Biosynthesis of secondary metabolites;Microbial metabolism in diverse environments;Biosynthesis of amino acids;Other	rp
FAUX	2-3-4-5-Tetrahydrodipicolinate@1.236-rp	2-3-4-5-Tetrahydrodipicolinate	171.053	1.236	C7H9NO4	#N/A	Metabolic pathways;Biosynthesis of secondary metabolites;Microbial metabolism in diverse environments;Biosynthesis of amino acids;Other	rp
FAUX	2-3-4-5-Tetrahydrodipicolinate@1.877-rp	2-3-4-5-Tetrahydrodipicolinate	171.053	1.877	C7H9NO4	#N/A	Metabolic pathways;Biosynthesis of secondary metabolites;Microbial metabolism in diverse environments;Biosynthesis of amino acids;Other	rp
FAUX	2-3-4-5-Tetrahydrodipicolinate@1.701-rp	2-3-4-5-Tetrahydrodipicolinate	171.053	1.701	C7H9NO4	#N/A	Metabolic pathways;Biosynthesis of secondary metabolites;Microbial metabolism in diverse environments;Biosynthesis of amino acids;Other	rp
FAUX	2-3-4-5-Tetrahydrodipicolinate@2.539-rp	2-3-4-5-Tetrahydrodipicolinate	171.054	2.539	C7H9NO4	#N/A	Metabolic pathways;Biosynthesis of secondary metabolites;Microbial metabolism in diverse environments;Biosynthesis of amino acids;Other	rp
FAUX	2-3-4-5-Tetrahydrodipicolinate@6.12-rp	2-3-4-5-Tetrahydrodipicolinate	171.054	6.12	C7H9NO4	#N/A	Metabolic pathways;Biosynthesis of secondary metabolites;Microbial metabolism in diverse environments;Biosynthesis of amino acids;Other	rp
FAUX	Metronidazole@1.097-rp	Metronidazole	171.065	1.097	C6H9N3O3	4029	#N/A	rp
FAUX	N-Butyryl-L-homoserinelactone@1.183-rp	N-Butyryl-L-homoserinelactone	171.09	1.183	C8H13NO3	#N/A	Other	rp
FAUX	N-Butyryl-L-homoserinelactone@2.129-rp	N-Butyryl-L-homoserinelactone	171.09	2.129	C8H13NO3	#N/A	Other	rp
FAUX	N-Butyryl-L-homoserinelactone@6.241-rp	N-Butyryl-L-homoserinelactone	171.09	6.241	C8H13NO3	#N/A	Other	rp
FAUX	Acetyl-L-carnitine@1.314-rp	Acetyl-L-carnitine	171.09	1.314	C9H17NO4	#N/A	Other	rp
FAUX	1-Carbamimidoyl-4-piperidinecarboxylicacid@1.245-rp	1-Carbamimidoyl-4-piperidinecarboxylicacid	171.101	1.245	C7H13N3O2	4325474	#N/A	rp
FAUX	1-Carbamimidoyl-4-piperidinecarboxylicacid@1.593-rp	1-Carbamimidoyl-4-piperidinecarboxylicacid	171.101	1.593	C7H13N3O2	4325474	#N/A	rp
FAUX	3621@15.949-rp	3621	171.108	15.949	C9H17NS	3333354	#N/A	rp
FAUX	3621@19.219-rp	3621	171.108	19.219	C9H17NS	3333354	#N/A	rp
FAUX	3621@21.895-rp	3621	171.108	21.895	C9H17NS	3333354	#N/A	rp
FAUX	(4-Ethyl-1-piperazinyl)acetate@1.579-rp	(4-Ethyl-1-piperazinyl)acetate	171.113	1.579	C8H15N2O2	14084803	#N/A	rp
FAUX	(4-Ethyl-1-piperazinyl)acetate@2.117-rp	(4-Ethyl-1-piperazinyl)acetate	171.113	2.117	C8H15N2O2	14084803	#N/A	rp
FAUX	171.51259@6.585-rp	#N/A	171.513	6.585	#N/A	#N/A	#N/A	rp
FAUX	171.59291@1.025-rp	#N/A	171.593	1.025	#N/A	#N/A	#N/A	rp
FAUX	171.9483@12.828-rp	#N/A	171.948	12.828	C7H2Cl2O	#N/A	#N/A	rp
FAUX	171.9807@0.925-rp	#N/A	171.981	0.925	#N/A	#N/A	#N/A	rp
FAUX	172.00453@1.145-rp	#N/A	172.005	1.145	C3H8O6S	#N/A	#N/A	rp
FAUX	beta-Glycerophosphoricacid@1.114-rp	beta-Glycerophosphoricacid	172.014	1.114	C3H9O6P	#N/A	Metabolic pathways;Biosynthesis of secondary metabolites;ABC transporters;Other	rp
FAUX	sulfanilamide@2.334-rp	sulfanilamide	172.031	2.334	C6H8N2O2S	5142	#N/A	rp
FAUX	172.03472@1.299-rp	#N/A	172.035	1.299	C3H4N6O3	#N/A	#N/A	rp
FAUX	172.0349@1.032-rp	#N/A	172.035	1.032	C3H4N6O3	#N/A	#N/A	rp
FAUX	172.03743@1.21-rp	#N/A	172.037	1.21	C2H5N8P	#N/A	Metabolic pathways;Biosynthesis of secondary metabolites;Microbial metabolism in diverse environments;Degradation of aromatic compounds;Biosynthesis of plant secondary metabolites;Biosynthesis of phenylpropanoids;Biosynthesis of amino acids;Biosynthesis of alkaloids derived from shikimate pathway;Tyrosine metabolism;Other	rp
FAUX	172.0376@1.47-rp	#N/A	172.038	1.47	C2H5N8P	#N/A	Metabolic pathways;Biosynthesis of secondary metabolites;Microbial metabolism in diverse environments;Degradation of aromatic compounds;Biosynthesis of plant secondary metabolites;Biosynthesis of phenylpropanoids;Biosynthesis of amino acids;Biosynthesis of alkaloids derived from shikimate pathway;Tyrosine metabolism;Other	rp
FAUX	172.03934@1.436-rp	#N/A	172.039	1.436	C8H4N4O	#N/A	#N/A	rp
FAUX	Hydantoin-5-propionate@1.076-rp	Hydantoin-5-propionate	172.049	1.076	C6H8N2O4	#N/A	Other	rp
FAUX	Hydantoin-5-propionate@1.228-rp	Hydantoin-5-propionate	172.049	1.228	C6H8N2O4	#N/A	Other	rp
FAUX	Hydantoin-5-propionate@1.787-rp	Hydantoin-5-propionate	172.049	1.787	C6H8N2O4	#N/A	Other	rp
FAUX	4-Amino-2,4-pyrrolidinedicarboxylate@1.055-rp	4-Amino-2,4-pyrrolidinedicarboxylate	172.05	1.055	C6H8N2O4	10654586	#N/A	rp
FAUX	6-phenylpyridazin-3-ol@8.638-rp	6-phenylpyridazin-3-ol	172.064	8.638	C10H8N2O	67657	#N/A	rp
FAUX	Diethylfumarate@2.154-rp	Diethylfumarate	172.074	2.154	C8H12O4	553702	#N/A	rp
FAUX	Diethylfumarate@2.304-rp	Diethylfumarate	172.074	2.304	C8H12O4	553702	#N/A	rp
FAUX	Diethylfumarate@5.722-rp	Diethylfumarate	172.074	5.722	C8H12O4	553702	#N/A	rp
FAUX	Diethylfumarate@2.966-rp	Diethylfumarate	172.074	2.966	C8H12O4	553702	#N/A	rp
FAUX	Gly-Pro(Glycylproline)@1.476-rp	Gly-Pro(Glycylproline)	172.085	1.476	C7H12N2O3	#N/A	#N/A	rp
FAUX	Gly-Pro(Glycylproline)@2.116-rp	Gly-Pro(Glycylproline)	172.085	2.116	C7H12N2O3	#N/A	#N/A	rp
FAUX	Gly-Pro(Glycylproline)@1.354-rp	Gly-Pro(Glycylproline)	172.085	1.354	C7H12N2O3	#N/A	#N/A	rp
FAUX	Gly-Pro(Glycylproline)@1.133-rp	Gly-Pro(Glycylproline)	172.085	1.133	C7H12N2O3	#N/A	#N/A	rp
FAUX	Gly-Pro(Glycylproline)@1.836-rp	Gly-Pro(Glycylproline)	172.085	1.836	C7H12N2O3	#N/A	#N/A	rp
FAUX	9H-Fluoren-9-yllithium@1.48-rp	9H-Fluoren-9-yllithium	172.086	1.48	C13H9Li	13578557	#N/A	rp
FAUX	naphthalen-1-ethanol@11.111-rp	naphthalen-1-ethanol	172.089	11.111	C12H12O	12505	#N/A	rp
FAUX	naphthalen-1-ethanol@8.149-rp	naphthalen-1-ethanol	172.089	8.149	C12H12O	12505	#N/A	rp
FAUX	naphthalen-1-ethanol@8.427-rp	naphthalen-1-ethanol	172.089	8.427	C12H12O	12505	#N/A	rp
FAUX	172.09037@1.144-rp	#N/A	172.09	1.144	#N/A	#N/A	#N/A	rp
FAUX	Tryptoline@4.704-rp	Tryptoline	172.1	4.704	C11H12N2	96979	#N/A	rp
FAUX	9-Oxononanoicacid@15.489-rp	9-Oxononanoicacid	172.11	15.489	C9H16O3	#N/A	Biosynthesis of secondary metabolites;Other	rp
FAUX	9-Oxononanoicacid@12.783-rp	9-Oxononanoicacid	172.11	12.783	C9H16O3	#N/A	Biosynthesis of secondary metabolites;Other	rp
FAUX	9-Oxononanoicacid@9.062-rp	9-Oxononanoicacid	172.11	9.062	C9H16O3	#N/A	Biosynthesis of secondary metabolites;Other	rp
FAUX	9-Oxononanoicacid@7.135-rp	9-Oxononanoicacid	172.11	7.135	C9H16O3	#N/A	Biosynthesis of secondary metabolites;Other	rp
FAUX	DimethylAdipimidate@4.601-rp	DimethylAdipimidate	172.121	4.601	C8H16N2O2	10608200	#N/A	rp
FAUX	DimethylAdipimidate@1.645-rp	DimethylAdipimidate	172.121	1.645	C8H16N2O2	10608200	#N/A	rp
FAUX	4-Pentylphenylacetylene@13.383-rp	4-Pentylphenylacetylene	172.125	13.383	C13H16	2055502	#N/A	rp
FAUX	4-Pentylphenylacetylene@13.916-rp	4-Pentylphenylacetylene	172.125	13.916	C13H16	2055502	#N/A	rp
FAUX	Acetylagmatine@1.568-rp	Acetylagmatine	172.133	1.568	C7H16N4O	9564380	#N/A	rp
FAUX	N6-N6-N6-Trimethyl-L-lysine@2.004-rp	N6-N6-N6-Trimethyl-L-lysine	172.158	2.004	C9H20N2O	#N/A	#N/A	rp
FAUX	172.53174@6.585-rp	#N/A	172.532	6.585	#N/A	#N/A	#N/A	rp
FAUX	4-aminobenzenesulfonicacid@4.006-rp	4-aminobenzenesulfonicacid	173.015	4.006	C6H7NO3S	#N/A	Microbial metabolism in diverse environments;Aminobenzoate degradation;Other	rp
FAUX	4-aminobenzenesulfonicacid@1.184-rp	4-aminobenzenesulfonicacid	173.015	1.184	C6H7NO3S	#N/A	Microbial metabolism in diverse environments;Aminobenzoate degradation;Other	rp
FAUX	2-Amino-3-oxoadipate@1.117-rp	2-Amino-3-oxoadipate	173.033	1.117	C6H7NO5	35016022	#N/A	rp
FAUX	Guanidinosuccinate@1.18-rp	Guanidinosuccinate	173.044	1.18	C5H7N3O4	13765203	#N/A	rp
FAUX	4-Quinolinecarboxylicacid@6.476-rp	4-Quinolinecarboxylicacid	173.048	6.476	C10H7NO2	#N/A	Other	rp
FAUX	4-Quinolinecarboxylicacid@4.035-rp	4-Quinolinecarboxylicacid	173.048	4.035	C10H7NO2	#N/A	Other	rp
FAUX	4-Quinolinecarboxylicacid@7.625-rp	4-Quinolinecarboxylicacid	173.048	7.625	C10H7NO2	#N/A	Other	rp
FAUX	173.06035@8.452-rp	#N/A	173.06	8.452	C7H12NO2P	#N/A	#N/A	rp
FAUX	N-Acetyl-L-glutamate5-semialdehyde@1.538-rp	N-Acetyl-L-glutamate5-semialdehyde	173.069	1.538	C7H11NO4	#N/A	Metabolic pathways;Biosynthesis of secondary metabolites;Biosynthesis of amino acids;2-Oxocarboxylic acid metabolism;Other	rp
FAUX	N-Acetyl-L-glutamate5-semialdehyde@1.151-rp	N-Acetyl-L-glutamate5-semialdehyde	173.069	1.151	C7H11NO4	#N/A	Metabolic pathways;Biosynthesis of secondary metabolites;Biosynthesis of amino acids;2-Oxocarboxylic acid metabolism;Other	rp
FAUX	5-Guanidino-2-oxopentanoate@1.215-rp	5-Guanidino-2-oxopentanoate	173.08	1.215	C6H11N3O3	#N/A	Metabolic pathways;Other	rp
FAUX	5-Guanidino-2-oxopentanoate@1.306-rp	5-Guanidino-2-oxopentanoate	173.08	1.306	C6H11N3O3	#N/A	Metabolic pathways;Other	rp
FAUX	5-Guanidino-2-oxopentanoate@1.06-rp	5-Guanidino-2-oxopentanoate	173.08	1.06	C6H11N3O3	#N/A	Metabolic pathways;Other	rp
FAUX	173.08144@1.056-rp	#N/A	173.081	1.056	#N/A	#N/A	#N/A	rp
FAUX	173.0927@1.043-rp	#N/A	173.093	1.043	#N/A	#N/A	#N/A	rp
FAUX	Hexanoylglycine@1.257-rp	Hexanoylglycine	173.105	1.257	C8H15NO3	#N/A	Other	rp
FAUX	Hexanoylglycine@3.65-rp	Hexanoylglycine	173.105	3.65	C8H15NO3	#N/A	Other	rp
FAUX	2-(Acetylamino)hexanoicacid@7.125-rp	2-(Acetylamino)hexanoicacid	173.105	7.125	C8H15NO3	#N/A	Other	rp
FAUX	2-(Acetylamino)hexanoicacid@6.919-rp	2-(Acetylamino)hexanoicacid	173.106	6.919	C8H15NO3	#N/A	Other	rp
FAUX	2-(Acetylamino)hexanoicacid@6.27-rp	2-(Acetylamino)hexanoicacid	173.106	6.27	C8H15NO3	#N/A	Other	rp
FAUX	173.11095@1.078-rp	#N/A	173.111	1.078	#N/A	#N/A	#N/A	rp
FAUX	L-Indospicine@2.781-rp	L-Indospicine	173.116	2.781	C7H15N3O2	#N/A	#N/A	rp
FAUX	L-Indospicine@1.893-rp	L-Indospicine	173.117	1.893	C7H15N3O2	#N/A	#N/A	rp
FAUX	L-Indospicine@1.773-rp	L-Indospicine	173.117	1.773	C7H15N3O2	#N/A	#N/A	rp
FAUX	173.12368@11.549-rp	#N/A	173.124	11.549	C9H19NS	#N/A	#N/A	rp
FAUX	173.12368@15.507-rp	#N/A	173.124	15.507	C9H19NS	#N/A	#N/A	rp
FAUX	1422990@2.128-rp	1422990	173.142	2.128	C9H19NO2	5202	#N/A	rp
FAUX	173.14917@9.601-rp	#N/A	173.149	9.601	#N/A	#N/A	#N/A	rp
FAUX	173.14925@11.642-rp	#N/A	173.149	11.642	#N/A	#N/A	#N/A	rp
FAUX	1-(3-dimethylaminopropyl)-3-ethylurea@1.478-rp	1-(3-dimethylaminopropyl)-3-ethylurea	173.153	1.478	C8H19N3O	3406708	#N/A	rp
FAUX	173.98425@1.601-rp	#N/A	173.984	1.601	C2H8O5P2	#N/A	#N/A	rp
FAUX	cis-Aconiticacid@1.259-rp	cis-Aconiticacid	174.017	1.259	C6H6O6	#N/A	Metabolic pathways;Biosynthesis of secondary metabolites;Microbial metabolism in diverse environments;Biosynthesis of plant secondary metabolites;Biosynthesis of phenylpropanoids;2-Oxocarboxylic acid metabolism;Biosynthesis of alkaloids derived from shikimate pathway;Biosynthesis of plant hormones;Other	rp
FAUX	Sinapinicacid@9.445-rp	Sinapinicacid	174.032	9.445	C11H12O5	553361	#N/A	rp
FAUX	Sinapinicacid@8.569-rp	Sinapinicacid	174.032	8.569	C11H12O5	553361	#N/A	rp
FAUX	174.03803@0.862-rp	#N/A	174.038	0.862	C4H6N4O4	#N/A	#N/A	rp
FAUX	(2S)-2-Isopropyl-3-oxosuccinate@1.301-rp	(2S)-2-Isopropyl-3-oxosuccinate	174.053	1.301	C7H10O5	131727	Metabolic pathways;Biosynthesis of secondary metabolites;Microbial metabolism in diverse environments;Degradation of aromatic compounds;Biosynthesis of plant secondary metabolites;Biosynthesis of phenylpropanoids;Biosynthesis of amino acids;2-Oxocarboxylic acid metabolism;Biosynthesis of alkaloids derived from shikimate pathway;Biosynthesis of plant hormones;Other	rp
FAUX	(2S)-2-Isopropyl-3-oxosuccinate@2.741-rp	(2S)-2-Isopropyl-3-oxosuccinate	174.053	2.741	C7H10O5	131727	Metabolic pathways;Biosynthesis of secondary metabolites;Microbial metabolism in diverse environments;Degradation of aromatic compounds;Biosynthesis of plant secondary metabolites;Biosynthesis of phenylpropanoids;Biosynthesis of amino acids;2-Oxocarboxylic acid metabolism;Biosynthesis of alkaloids derived from shikimate pathway;Biosynthesis of plant hormones;Other	rp
FAUX	(2S)-2-Isopropyl-3-oxosuccinate@1.782-rp	(2S)-2-Isopropyl-3-oxosuccinate	174.053	1.782	C7H10O5	131727	Metabolic pathways;Biosynthesis of secondary metabolites;Microbial metabolism in diverse environments;Degradation of aromatic compounds;Biosynthesis of plant secondary metabolites;Biosynthesis of phenylpropanoids;Biosynthesis of amino acids;2-Oxocarboxylic acid metabolism;Biosynthesis of alkaloids derived from shikimate pathway;Biosynthesis of plant hormones;Other	rp
FAUX	formyl-isoglutamine@1.845-rp	formyl-isoglutamine	174.064	1.845	C6H10N2O4	#N/A	Metabolic pathways;Other	rp
FAUX	formyl-isoglutamine@1.1-rp	formyl-isoglutamine	174.064	1.1	C6H10N2O4	#N/A	Metabolic pathways;Other	rp
FAUX	formyl-isoglutamine@1.274-rp	formyl-isoglutamine	174.064	1.274	C6H10N2O4	#N/A	Metabolic pathways;Other	rp
FAUX	1-8-Dihydroxy-3-methylnaphthalene@8.153-rp	1-8-Dihydroxy-3-methylnaphthalene	174.068	8.153	C11H10O2	#N/A	Microbial metabolism in diverse environments;Degradation of aromatic compounds;Other	rp
FAUX	1-8-Dihydroxy-3-methylnaphthalene@8.779-rp	1-8-Dihydroxy-3-methylnaphthalene	174.068	8.779	C11H10O2	#N/A	Microbial metabolism in diverse environments;Degradation of aromatic compounds;Other	rp
FAUX	1-8-Dihydroxy-3-methylnaphthalene@9.742-rp	1-8-Dihydroxy-3-methylnaphthalene	174.068	9.742	C11H10O2	#N/A	Microbial metabolism in diverse environments;Degradation of aromatic compounds;Other	rp
FAUX	Indole-3-acetaldoxime@4.714-rp	Indole-3-acetaldoxime	174.079	4.714	C10H10N2O	#N/A	Metabolic pathways;Biosynthesis of secondary metabolites;2-Oxocarboxylic acid metabolism;Tryptophan metabolism;Other	rp
FAUX	Indole-3-acetaldoxime@6.068-rp	Indole-3-acetaldoxime	174.079	6.068	C10H10N2O	#N/A	Metabolic pathways;Biosynthesis of secondary metabolites;2-Oxocarboxylic acid metabolism;Tryptophan metabolism;Other	rp
FAUX	Indole-3-acetaldoxime@1.458-rp	Indole-3-acetaldoxime	174.08	1.458	C10H10N2O	#N/A	Metabolic pathways;Biosynthesis of secondary metabolites;2-Oxocarboxylic acid metabolism;Tryptophan metabolism;Other	rp
FAUX	Indole-3-acetaldoxime@1.61-rp	Indole-3-acetaldoxime	174.08	1.61	C10H10N2O	#N/A	Metabolic pathways;Biosynthesis of secondary metabolites;2-Oxocarboxylic acid metabolism;Tryptophan metabolism;Other	rp
FAUX	Subericacid@3.454-rp	Subericacid	174.089	3.454	C8H14O4	#N/A	Other	rp
FAUX	Subericacid@8.512-rp	Subericacid	174.089	8.512	C8H14O4	10025	Other	rp
FAUX	Subericacid@2.364-rp	Subericacid	174.089	2.364	C8H14O4	#N/A	Other	rp
FAUX	Subericacid@1.741-rp	Subericacid	174.089	1.741	C8H14O4	10025	Other	rp
FAUX	Subericacid@2.555-rp	Subericacid	174.089	2.555	C8H14O4	10025	Other	rp
FAUX	Subericacid@2.116-rp	Subericacid	174.089	2.116	C8H14O4	#N/A	Other	rp
FAUX	N5-Ethyl-L-glutamine@5.385-rp	N5-Ethyl-L-glutamine	174.101	5.385	C7H14N2O3	#N/A	Metabolic pathways;Biosynthesis of secondary metabolites;Biosynthesis of amino acids;2-Oxocarboxylic acid metabolism;Other	rp
FAUX	N5-Ethyl-L-glutamine@3.124-rp	N5-Ethyl-L-glutamine	174.101	3.124	C7H14N2O3	#N/A	Metabolic pathways;Biosynthesis of secondary metabolites;Biosynthesis of amino acids;2-Oxocarboxylic acid metabolism;Other	rp
FAUX	N5-Ethyl-L-glutamine@1.86-rp	N5-Ethyl-L-glutamine	174.101	1.86	C7H14N2O3	#N/A	Metabolic pathways;Biosynthesis of secondary metabolites;Biosynthesis of amino acids;2-Oxocarboxylic acid metabolism;Other	rp
FAUX	3-Phenylcyclohexanone@10.167-rp	3-Phenylcyclohexanone	174.104	10.167	C12H14O	240794	#N/A	rp
FAUX	3-Phenylcyclohexanone@7.805-rp	3-Phenylcyclohexanone	174.104	7.805	C12H14O	240794	#N/A	rp
FAUX	3-Phenylcyclohexanone@8.172-rp	3-Phenylcyclohexanone	174.104	8.172	C12H14O	240794	#N/A	rp
FAUX	3-Phenylcyclohexanone@8.649-rp	3-Phenylcyclohexanone	174.104	8.649	C12H14O	240794	#N/A	rp
FAUX	DL-Arginine@1.477-rp	DL-Arginine	174.112	1.477	C6H14N4O2	227	Metabolic pathways;Biosynthesis of secondary metabolites;Biosynthesis of plant secondary metabolites;Biosynthesis of amino acids;ABC transporters;Other	rp
FAUX	DL-Arginine@1.028-rp	DL-Arginine	174.112	1.028	C6H14N4O2	227	Metabolic pathways;Biosynthesis of secondary metabolites;Biosynthesis of plant secondary metabolites;Biosynthesis of amino acids;ABC transporters;Other	rp
FAUX	9-Hydroxynonanoicacid@10.711-rp	9-Hydroxynonanoicacid	174.126	10.711	C9H18O3	121694	#N/A	rp
FAUX	9-Hydroxynonanoicacid@9.193-rp	9-Hydroxynonanoicacid	174.126	9.193	C9H18O3	121694	#N/A	rp
FAUX	ionene@17.794-rp	ionene	174.141	17.794	C13H18	61372	#N/A	rp
FAUX	ionene@19.214-rp	ionene	174.141	19.214	C13H18	61372	#N/A	rp
FAUX	ionene@15.062-rp	ionene	174.141	15.062	C13H18	61372	#N/A	rp
FAUX	ionene@16.259-rp	ionene	174.141	16.259	C13H18	61372	#N/A	rp
FAUX	ionene@9.25-rp	ionene	174.141	9.25	C13H18	61372	#N/A	rp
FAUX	ionene@8.323-rp	ionene	174.141	8.323	C13H18	61372	#N/A	rp
FAUX	174.51292@12.477-rp	#N/A	174.513	12.477	#N/A	#N/A	#N/A	rp
FAUX	174.54761@8.967-rp	#N/A	174.548	8.967	#N/A	#N/A	#N/A	rp
FAUX	174.58764@2.238-rp	#N/A	174.588	2.238	#N/A	#N/A	#N/A	rp
FAUX	174.58771@1.473-rp	#N/A	174.588	1.473	#N/A	#N/A	#N/A	rp
FAUX	175.0094@0.887-rp	#N/A	175.009	0.887	CHN7O4	#N/A	#N/A	rp
FAUX	3-Acetyl-4-thiazolidinecarboxylicacid@1.23-rp	3-Acetyl-4-thiazolidinecarboxylicacid	175.031	1.23	C6H9NO3S	89354	#N/A	rp
FAUX	(2-Oxo-3-sulfanyl-1-pyrrolidinyl)aceticacid@2.469-rp	(2-Oxo-3-sulfanyl-1-pyrrolidinyl)aceticacid	175.031	2.469	C6H9NO3S	113964	#N/A	rp
FAUX	3-Acetyl-4-thiazolidinecarboxylicacid@4.051-rp	3-Acetyl-4-thiazolidinecarboxylicacid	175.031	4.051	C6H9NO3S	89354	#N/A	rp
FAUX	3-Acetyl-4-thiazolidinecarboxylicacid@1.619-rp	3-Acetyl-4-thiazolidinecarboxylicacid	175.031	1.619	C6H9NO3S	89354	#N/A	rp
FAUX	175.03323@0.877-rp	#N/A	175.033	0.877	#N/A	#N/A	#N/A	rp
FAUX	Bis(carbamoylamino)acetate@4.713-rp	Bis(carbamoylamino)acetate	175.047	4.713	C4H7N4O4	4447481	#N/A	rp
FAUX	N-Acetylasparticacid@1.15-rp	N-Acetylasparticacid	175.048	1.15	C6H9NO5	88007	Metabolic pathways;Other	rp
FAUX	N-Acetylasparticacid@1.478-rp	N-Acetylasparticacid	175.048	1.478	C6H9NO5	88007	Metabolic pathways;Other	rp
FAUX	N-Amidino-L-aspartate@1.076-rp	N-Amidino-L-aspartate	175.06	1.076	C5H9N3O4	#N/A	#N/A	rp
FAUX	3-hydroxy-2-methyl-1H-quinolin-4-one@9.559-rp	3-hydroxy-2-methyl-1H-quinolin-4-one	175.063	9.559	C10H9NO2	#N/A	Metabolic pathways;Tryptophan metabolism;Biosynthesis of plant hormones;Other	rp
FAUX	3-hydroxy-2-methyl-1H-quinolin-4-one@7.168-rp	3-hydroxy-2-methyl-1H-quinolin-4-one	175.064	7.168	C10H9NO2	#N/A	Metabolic pathways;Tryptophan metabolism;Biosynthesis of plant hormones;Other	rp
FAUX	3-hydroxy-2-methyl-1H-quinolin-4-one@8.417-rp	3-hydroxy-2-methyl-1H-quinolin-4-one	175.064	8.417	C10H9NO2	#N/A	Metabolic pathways;Tryptophan metabolism;Biosynthesis of plant hormones;Other	rp
FAUX	175.07583@12.866-rp	#N/A	175.076	12.866	C7H14NO2P	#N/A	#N/A	rp
FAUX	Boc-Gly-OH@0.894-rp	Boc-Gly-OH	175.085	0.894	C7H13NO4	70660	#N/A	rp
FAUX	8-Azabicyclo[3.2.1]octane-1,2,3,4-tetrol@1.113-rp	8-Azabicyclo[3.2.1]octane-1,2,3,4-tetrol	175.085	1.113	C7H13NO4	4447294	#N/A	rp
FAUX	Boc-Gly-OH@1.702-rp	Boc-Gly-OH	175.085	1.702	C7H13NO4	70660	#N/A	rp
FAUX	8-Azabicyclo[3.2.1]octane-1,2,3,4-tetrol@1.922-rp	8-Azabicyclo[3.2.1]octane-1,2,3,4-tetrol	175.085	1.922	C7H13NO4	4447294	#N/A	rp
FAUX	Boc-Gly-OH@3.106-rp	Boc-Gly-OH	175.085	3.106	C7H13NO4	70660	#N/A	rp
FAUX	N-(5-Hydroxypentanoyl)glycine@2.619-rp	N-(5-Hydroxypentanoyl)glycine	175.085	2.619	C7H13NO4	4447094	#N/A	rp
FAUX	Boc-Gly-OH@2.374-rp	Boc-Gly-OH	175.085	2.374	C7H13NO4	70660	#N/A	rp
FAUX	L-(+)-Citrulline@1.071-rp	L-(+)-Citrulline	175.096	1.071	C6H13N3O3	#N/A	Metabolic pathways;Biosynthesis of secondary metabolites;Biosynthesis of amino acids;Other	rp
FAUX	7-methylthioheptanaldoxime@1.167-rp	7-methylthioheptanaldoxime	175.104	1.167	C8H17NOS	64608	2-Oxocarboxylic acid metabolism;Other	rp
FAUX	Debrisoquin@2.171-rp	Debrisoquin	175.111	2.171	C10H13N3	#N/A	#N/A	rp
FAUX	Statine@1.221-rp	Statine	175.121	1.221	C8H17NO3	2632509	#N/A	rp
FAUX	N-(2-Hydroxypropyl)-L-valine@1.496-rp	N-(2-Hydroxypropyl)-L-valine	175.121	1.496	C8H17NO3	115221	#N/A	rp
FAUX	175.57737@1.132-rp	#N/A	175.577	1.132	#N/A	#N/A	#N/A	rp
FAUX	175.59528@1.08-rp	#N/A	175.595	1.08	#N/A	#N/A	#N/A	rp
FAUX	175.59546@1.46-rp	#N/A	175.595	1.46	#N/A	#N/A	#N/A	rp
FAUX	176.01073@11.416-rp	#N/A	176.011	11.416	C3H5N4O3P	#N/A	#N/A	rp
FAUX	(4S)-4-6-Dihydroxy-2-5-dioxohexanoate@1.258-rp	(4S)-4-6-Dihydroxy-2-5-dioxohexanoate	176.032	1.258	C6H8O6	#N/A	Metabolic pathways;Biosynthesis of secondary metabolites;Microbial metabolism in diverse environments;Other	rp
FAUX	(4S)-4-6-Dihydroxy-2-5-dioxohexanoate@8.831-rp	(4S)-4-6-Dihydroxy-2-5-dioxohexanoate	176.032	8.831	C6H8O6	#N/A	Metabolic pathways;Biosynthesis of secondary metabolites;Microbial metabolism in diverse environments;Other	rp
FAUX	176.03498@6.584-rp	#N/A	176.035	6.584	#N/A	#N/A	#N/A	rp
FAUX	176.04235@7.626-rp	#N/A	176.042	7.626	#N/A	#N/A	#N/A	rp
FAUX	N3-Oxalyl-L-2-3-diaminopropanoate@1.244-rp	N3-Oxalyl-L-2-3-diaminopropanoate	176.044	1.244	C5H8N2O5	#N/A	Metabolic pathways;Other	rp
FAUX	4-Methylumbelliferonehydrate@8.157-rp	4-Methylumbelliferonehydrate	176.047	8.157	C10H8O3	#N/A	#N/A	rp
FAUX	1-3-8-Naphthalenertriol@11.938-rp	1-3-8-Naphthalenertriol	176.047	11.938	C10H8O3	#N/A	#N/A	rp
FAUX	1-3-8-Naphthalenertriol@12.974-rp	1-3-8-Naphthalenertriol	176.047	12.974	C10H8O3	#N/A	#N/A	rp
FAUX	2-Azido-7H-purin-6-amine@14.301-rp	2-Azido-7H-purin-6-amine	176.057	14.301	C5H4N8	3852770	#N/A	rp
FAUX	(2R-3S)-3-Isopropylmalate@1.084-rp	(2R-3S)-3-Isopropylmalate	176.069	1.084	C7H12O5	#N/A	Metabolic pathways;Biosynthesis of secondary metabolites;Biosynthesis of amino acids;2-Oxocarboxylic acid metabolism;Other	rp
FAUX	(2R-3S)-3-Isopropylmalate@1.312-rp	(2R-3S)-3-Isopropylmalate	176.069	1.312	C7H12O5	#N/A	Metabolic pathways;Biosynthesis of secondary metabolites;Biosynthesis of amino acids;2-Oxocarboxylic acid metabolism;Other	rp
FAUX	(2R-3S)-3-Isopropylmalate@2.701-rp	(2R-3S)-3-Isopropylmalate	176.069	2.701	C7H12O5	#N/A	Metabolic pathways;Biosynthesis of secondary metabolites;Biosynthesis of amino acids;2-Oxocarboxylic acid metabolism;Other	rp
FAUX	(2R-3S)-3-Isopropylmalate@2.194-rp	(2R-3S)-3-Isopropylmalate	176.069	2.194	C7H12O5	#N/A	Metabolic pathways;Biosynthesis of secondary metabolites;Biosynthesis of amino acids;2-Oxocarboxylic acid metabolism;Other	rp
FAUX	2-Isopropylmalicacid@3.731-rp	2-Isopropylmalicacid	176.069	3.731	C7H12O5	#N/A	Metabolic pathways;Biosynthesis of secondary metabolites;Biosynthesis of amino acids;2-Oxocarboxylic acid metabolism;Other	rp
FAUX	EDDA@1.042-rp	EDDA	176.08	1.042	C6H12N2O4	55826	Other	rp
FAUX	6-Methyl-2,4-Diaminopteridine@1.467-rp	6-Methyl-2,4-Diaminopteridine	176.081	1.467	C7H8N6	223468	#N/A	rp
FAUX	5,6,7,8-tetrahydro-2-naphthoicacid@8.361-rp	5,6,7,8-tetrahydro-2-naphthoicacid	176.084	8.361	C11H12O2	#N/A	Microbial metabolism in diverse environments;Degradation of aromatic compounds;Other	rp
FAUX	5,6,7,8-tetrahydro-2-naphthoicacid@14.173-rp	5,6,7,8-tetrahydro-2-naphthoicacid	176.084	14.173	C11H12O2	#N/A	Microbial metabolism in diverse environments;Degradation of aromatic compounds;Other	rp
FAUX	5,6,7,8-tetrahydro-2-naphthoicacid@8.711-rp	5,6,7,8-tetrahydro-2-naphthoicacid	176.084	8.711	C11H12O2	#N/A	Microbial metabolism in diverse environments;Degradation of aromatic compounds;Other	rp
FAUX	Cotinine@6.994-rp	Cotinine	176.095	6.994	C10H12N2O	#N/A	Metabolic pathways;Biosynthesis of secondary metabolites;Microbial metabolism in diverse environments;Biosynthesis of alkaloids derived from shikimate pathway;Tryptophan metabolism;Bile secretion;Other	rp
FAUX	Cotinine@4.847-rp	Cotinine	176.095	4.847	C10H12N2O	#N/A	Metabolic pathways;Biosynthesis of secondary metabolites;Microbial metabolism in diverse environments;Biosynthesis of alkaloids derived from shikimate pathway;Tryptophan metabolism;Bile secretion;Other	rp
FAUX	6,8-Dihydroxyoctanoicacid@9.315-rp	6,8-Dihydroxyoctanoicacid	176.105	9.315	C8H16O4	7990241	#N/A	rp
FAUX	methyl2-deoxy-alpha-D-glucoside@9.527-rp	methyl2-deoxy-alpha-D-glucoside	176.105	9.527	C8H16O4	35014885	#N/A	rp
FAUX	12-Crown-4@4.225-rp	12-Crown-4	176.105	4.225	C8H16O4	8912	#N/A	rp
FAUX	12-Crown-4@5.091-rp	12-Crown-4	176.105	5.091	C8H16O4	8912	#N/A	rp
FAUX	12-Crown-4@5.561-rp	12-Crown-4	176.105	5.561	C8H16O4	8912	#N/A	rp
FAUX	12-Crown-4@7.459-rp	12-Crown-4	176.105	7.459	C8H16O4	8912	#N/A	rp
FAUX	1,1'-Methylenebis(2-methyl-1H-imidazole)@6.941-rp	1,1'-Methylenebis(2-methyl-1H-imidazole)	176.105	6.941	C9H12N4	389721	#N/A	rp
FAUX	4-Cyclohexylphenol@13.38-rp	4-Cyclohexylphenol	176.12	13.38	C12H16O	13689	#N/A	rp
FAUX	3-PHENYL-3-METHYLHEXANE@16.358-rp	3-PHENYL-3-METHYLHEXANE	176.156	16.358	C13H20	15627	#N/A	rp
FAUX	3-PHENYL-3-METHYLHEXANE@20.827-rp	3-PHENYL-3-METHYLHEXANE	176.156	20.827	C13H20	15627	#N/A	rp
FAUX	3-PHENYL-3-METHYLHEXANE@15.956-rp	3-PHENYL-3-METHYLHEXANE	176.156	15.956	C13H20	15627	#N/A	rp
FAUX	3-PHENYL-3-METHYLHEXANE@17.88-rp	3-PHENYL-3-METHYLHEXANE	176.156	17.88	C13H20	15627	#N/A	rp
FAUX	3-PHENYL-3-METHYLHEXANE@15.299-rp	3-PHENYL-3-METHYLHEXANE	176.156	15.299	C13H20	15627	#N/A	rp
FAUX	3-PHENYL-3-METHYLHEXANE@16.874-rp	3-PHENYL-3-METHYLHEXANE	176.156	16.874	C13H20	15627	#N/A	rp
FAUX	3-PHENYL-3-METHYLHEXANE@18.926-rp	3-PHENYL-3-METHYLHEXANE	176.156	18.926	C13H20	15627	#N/A	rp
FAUX	3-PHENYL-3-METHYLHEXANE@18.146-rp	3-PHENYL-3-METHYLHEXANE	176.156	18.146	C13H20	15627	#N/A	rp
FAUX	3-PHENYL-3-METHYLHEXANE@19.46-rp	3-PHENYL-3-METHYLHEXANE	176.156	19.46	C13H20	15627	#N/A	rp
FAUX	176.57932@6.685-rp	#N/A	176.579	6.685	#N/A	#N/A	#N/A	rp
FAUX	176.58518@1.063-rp	#N/A	176.585	1.063	#N/A	#N/A	#N/A	rp
FAUX	176.6034@1.464-rp	#N/A	176.603	1.464	#N/A	#N/A	#N/A	rp
FAUX	1,3,5-Trihydroxy-1,3,5-triazinane-2,4,6-trione@1.009-rp	1,3,5-Trihydroxy-1,3,5-triazinane-2,4,6-trione	177.002	1.009	C3H3N3O6	8595153	#N/A	rp
[truncated: 20,169 more rows]

## Sheet: Area
	colon-686-ATB_81	colon-688-ATB_83	colon-690-ATB_85	colon-691-ATB_86	colon-692-ATB_87	colon-694-ATB_89	colon-666-FMT_61	colon-669-FMT_64	colon-670-FMT_65	colon-678-FMT_73	colon-682-FMT_77	colon-683-FMT_78	colon-668-FMT-AKK_63	colon-672-FMT-AKK_67	colon-674-FMT-AKK_69	colon-675-FMT-AKK_70	colon-679-FMT-AKK_74	colon-680-FMT-AKK_75	colon-667-FMT-AKK-Pas_62	colon-671-FMT-AKK-Pas_66	colon-676-FMT-AKK-Pas_71	colon-677-FMT-AKK-Pas_72	colon-681-FMT-AKK-Pas_76	Bl_matrice-colon_3a	Bl_matrice-colon_3b	Bl_matrice-colon_3c	QC_colon_4b	QC_colon_4c	QC_colon_4d	QC_colon_4e	QC_colon_4e_191121162904	colon-684-SPF_79	colon-685-SPF_80	colon-687-SPF_82	colon-689-SPF_84	colon-693-SPF_88	colon-695-SPF_90
2,4-Pentandione@2.218-rp	187037	36138.9	36404.9	251403	266711	263512	384806	958563	722650	3.29194e+06	739460	1.17111e+06	1.02975e+06	1.75123e+06	722050	1.05038e+06	582872	1.16851e+06	1.17221e+07	1.29344e+07	9.4713e+06	4.93369e+06	8.49404e+06	301284	257903	272881	2.76146e+06	2.7192e+06	2.70798e+06	2.9679e+06	2.85702e+06	3.06913e+06	787568	438125	620086	7.7333e+06	1.76897e+06
139.06106@1.052-rp	528867	449519	450854	380203	314503	479078	457447	577168	344448	1.7511e+06	738189	513978	1.57783e+06	1.10711e+06	651364	1.60271e+06	466191	899038	3.9974e+06	2.54556e+06	3.13553e+06	3.49986e+06	3.62373e+06	56186.6	47424.4	38167.1	603917	658773	896698	592841	503875	218774	724458	398328	445226	281868	277202
Fenipentol@11.093-rp	379451	304544	324666	328933	312865	315503	259932	591045	350256	374196	390874	380830	386475	304724	313896	265354	442472	265398	2.5906e+06	3.02927e+06	1.34034e+06	1.48786e+06	1.46868e+06	307431	201152	114009	313638	396275	422795	315951	677837	269835	307475	230178	297222	351973	465330
N-(Carboxymethyl)homocysteine@1.218-rp	8.87705e+06	8.21296e+06	7.1623e+06	7.89956e+06	5.64023e+06	7.95455e+06	7.66057e+06	8.77688e+06	6.27677e+06	8.67323e+06	9.2065e+06	1.57892e+07	7.03095e+06	9.02825e+06	7.04323e+06	5.11211e+06	6.70441e+06	6.28241e+06	2.1519e+07	5.22256e+06	1.84094e+07	1.75143e+07	2.72202e+07	136734	131961	138011	9.11508e+06	8.74426e+06	9.41345e+06	1.06732e+07	9.3131e+06	7.29443e+06	9.46752e+06	4.96767e+06	6.94962e+06	9.36526e+06	8.36694e+06
200.06635@2.221-rp	29399	25937.5	27162.7	21804.3	23101.7	22725.7	50120.9	30392.4	226301	524104	49125.4	265819	123919	155640	84165.8	222485	149176	213155	2.73168e+06	3.12201e+06	2.73588e+06	1.51803e+06	1.54547e+06	18574.2	15786.6	14956.6	544455	566320	500858	593276	483954	633448	203021	196854	110643	1.50007e+06	320942
211.07559@10.891-rp	117517	91613.9	77171.6	72972.9	68925.4	81737.9	71228.7	115518	59779.8	115312	101701	70287.8	127782	117717	123134	91521.1	115395	90653.8	4.72619e+06	8.10446e+06	2.21845e+06	3.53576e+06	4700818	15770.2	14635.5	13148.7	840150	631740	782808	750247	493819	91918.7	115169	56568.7	110504	144643	111177
219.06192@10.887-rp	100317	78204.8	65876.3	62292.2	58837.1	69774.3	60803.3	98610.3	51030.1	98433.9	86815.1	56314.8	109080	100488	91307.7	78125.6	98504.9	77385.2	661035	1.03763e+06	256651	382863	603227	13461.9	12493.4	11224.2	83091.8	85022.8	105764	93435.8	86684.6	78465	98311.9	48289	94330.2	123472	94904.7
219.12561@10.89-rp	245849	191659	161445	152661	144194	170998	149013	241667	125061	241235	220840	147044	267325	246268	257601	191465	241409	189650	1.28084e+06	2.6017e+06	639609	1.14535e+06	1.29105e+06	33580.8	30617.9	27507.5	327013	262057	191706	252134	212441	192297	240936	118343	231178	302596	232586
(Z)-3-Hexenylsalicylate@11.091-rp	608282	540023	650446	332958	410102	352589	830952	1.38183e+06	872792	1.003e+06	1.2875e+06	1.03038e+06	1.62083e+06	2.51083e+06	2.83277e+06	1.66056e+06	1.68212e+06	1.11384e+06	7.48946e+06	7.17434e+06	4.33997e+06	5.12036e+06	4.59245e+06	287033	399476	274688	2.21829e+06	2.06118e+06	2.04645e+06	1.87405e+06	2.87119e+06	1.07957e+06	1.87982e+06	822244	1.5516e+06	2.08529e+06	1.16775e+06
5,6-Dimethoxy-1H-indole-2-carboxylicacid@7.918-rp	249735	150250	127479	148897	88403.9	133514	270329	494254	129505	401514	355024	230590	321057	211755	250029	233305	213085	264681	4.1161e+06	354892	533201	3.40724e+06	1.18913e+06	39942.2	35716.2	31987.8	290709	270794	270271	346014	239764	244948	253412	177548	241031	346639	242018
Methyljasmonate@11.114-rp	3.5988e+06	1.9879e+06	1.47515e+06	1.4513e+06	1.50065e+06	1.71547e+06	1.25993e+06	5.56525e+06	2.66677e+06	862619	1.1907e+06	3.37549e+06	1.51261e+07	3.84867e+06	1.4486e+07	3.22236e+06	1.3825e+07	1.80599e+06	3.23763e+07	3.96303e+07	1.81383e+07	2.12342e+07	2.10689e+07	157104	126703	79071.6	7.3443e+06	7.08225e+06	7.4539e+06	7.88709e+06	7.08124e+06	1.42263e+06	1.57119e+06	1.09113e+06	1.50051e+06	1.39735e+06	745299
4-(Methoxycarbonyl)phenylsulfate@2.221-rp	46529.7	35937.3	36201.9	32062.5	29568.2	38309.1	224791	365238	408498	985394	269364	408624	371529	556799	391725	408328	331220	436086	3.61274e+06	4.39276e+06	3.15888e+06	1.69839e+06	2.58184e+06	19872.3	17942.2	17220.8	917455	976747	903482	908469	797562	861323	326345	199865	290427	2.58233e+06	664634
JussiaeiineA@3.568-rp	75551.2	66153.9	64662.7	62930.8	59936.8	58622.5	544534	780391	361061	767331	653992	267909	72731.7	85335.7	139216	48350.6	48309.3	48217	1.44383e+07	1.4699e+07	5.82065e+06	7.98395e+06	1.25294e+07	44681.6	40391.6	43271.4	1.99354e+06	1.85368e+06	1.96905e+06	2.02444e+06	1.74924e+06	121179	81191.6	50327.2	51542.1	269146	153591
Decylsulfate@2.082-rp	135085	100224	107659	41410.3	93359	85571.3	55104	81853.9	48059.7	67345.4	73242.1	54649.5	72317	69985.1	87181	92472.3	138167	178337	835244	896193	878052	375183	694576	20359.7	18846.4	17511.3	134939	137533	95001.4	162239	121968	57226.3	62289.4	42936.6	48500.3	82882.7	65066
242.07733@1.782-rp	86128.8	60526.6	68764.9	59380.9	54578.7	69566.8	63779.4	76863.4	171413	101173	62328.3	373436	77775.1	57268.2	85927.5	100975	63216.4	43497.1	774530	1.24705e+06	684731	775829	601203	18299.2	15759.8	14505.6	135471	48402.8	90482.7	103992	69826	76317.6	80649.9	50632.1	74467.9	54949.8	67572.3
244.08516@9.64-rp	730820	885664	347620	481265	344944	539080	181129	520451	364226	491518	259246	1.11961e+06	426494	776927	247290	447426	360528	504225	5.19058e+06	1.18704e+06	3.92197e+06	7.0639e+06	6.11782e+06	57838.4	52775.1	39534	1.00809e+06	1.16737e+06	1.15377e+06	1.39374e+06	983841	585295	430500	124240	1.01845e+06	455796	484310
3-Hydroxylidocaine@5.408-rp	40323.9	34142.8	39504.7	28715.6	34793.2	32690.4	33849.7	32825.6	33184.1	37782.1	47205.2	30379.2	36927.1	34582.3	33982.5	29004.2	33781.5	29507.2	1.37975e+06	1.44374e+06	563383	470497	1.14231e+06	23227.8	28505.3	21259.4	160626	171726	143978	185713	160414	38745.4	42210.4	31641.3	33258.3	232813	79717.9
257.16178@1.853-rp	335259	348884	167465	86225.1	186580	172013	40997.9	62130.3	37453.7	52005.8	66114.6	91442.7	192751	480634	232114	126380	219314	231862	1.36414e+06	2.98943e+06	2.62239e+06	738154	711853	22265.1	21054.2	18046.1	386853	355318	358590	357324	371722	43586.6	80387.5	36755.2	66852.8	85889.8	48256.7
Caffeicacid3-sulfate@4.482-rp	374454	398282	198437	199152	196533	223384	321444	117759	92229.9	78861.6	318192	61015.4	270454	167088	292996	134727	204368	272408	1.26887e+06	3.07904e+06	628621	1.01823e+06	1.67772e+06	52517.7	47849.9	44938.5	361640	315602	293051	239879	282588	60016.7	69970	226609	60177	286593	461761
AignopsanoicacidB@10.694-rp	977577	395911	503883	447130	231653	544545	663809	838218	1.89297e+06	1.09285e+06	799312	1.42789e+06	2.84389e+06	1.87504e+07	832954	1.29738e+07	452509	1.74255e+07	2.79858e+07	2.14389e+07	1.89218e+07	1.61676e+07	2.13364e+07	176874	284346	161361	8.08406e+06	6.26839e+06	6.56412e+06	7.19098e+06	6.5563e+06	2.05221e+06	1.63083e+06	1.23283e+06	1.64584e+06	3.01847e+06	1.70972e+06
270.14734@11.091-rp	1.64292e+06	813739	1.06315e+06	879185	572453	1.1465e+06	439402	1.48611e+06	569531	311671	413510	1.0366e+06	4.5347e+06	408367	3.19021e+06	126753	2.22966e+06	190747	3.22247e+07	3.92913e+07	1.79948e+07	2.10426e+07	2.08944e+07	119398	103675	67233.8	5.14594e+06	5.14648e+06	5.44331e+06	5.92313e+06	5.0578e+06	242005	421967	287738	287131	1.28904e+06	630054
272.06032@9.628-rp	179745	176129	155586	144201	117323	154904	108571	169598	101028	127947	140220	89536.1	162464	164745	207419	127883	158639	136236	9.92738e+06	1.3237e+06	3.91513e+07	1.12361e+07	4.97029e+07	56592.7	47868.8	43310.5	3.21555e+06	3.06546e+06	3.06042e+06	2.95816e+06	3.15148e+06	104429	123996	76602	132407	138077	114850
272.14879@1.627-rp	742913	382762	231452	257178	332245	454905	283845	395639	200892	479088	413153	191215	507108	334817	303543	621872	201684	300836	791408	1.2588e+06	1.6616e+06	737291	2.81911e+06	36461.9	31714.9	25019.9	268285	300590	525931	621151	385956	228161	325618	326154	321492	341390	200548
277.92097@1.079-rp	323973	307709	306969	284701	289068	282903	162403	169815	202046	198867	206640	145266	222909	175049	152720	146726	156101	130124	861319	1.10884e+06	572724	898762	546609	16162.4	13764	13542	193827	187381	192035	207995	184558	512881	151553	170769	173880	391906	253706
Mepyramine@6.6-rp	74183.8	50426.6	49043.5	43376.2	43029.7	52207	134252	182805	101669	143323	172914	112918	170382	173587	236762	125053	136968	140601	1.10813e+06	1.18981e+06	110005	335787	865750	22834.9	21932.4	18481.6	158074	134462	115639	126148	147861	90968.4	88936	39811	56262.1	142932	113925
Shikonin@12.983-rp	80027.5	74260.9	74244.4	74404.9	82951.7	73168.2	94963.6	110842	108038	115203	93834.6	204631	91911.3	118188	106515	85352.6	93988.6	105372	3.65687e+06	336014	1.12387e+06	2.72919e+06	3.42149e+06	46553.5	36492.7	33111.8	350406	377449	348087	344044	284176	108804	129010	72270.3	103148	105284	96296.8
291.01728@2.222-rp	72166	41446.4	38343.7	57693.3	48817.7	43377.2	55816.2	148785	131937	422799	164460	255366	272396	230947	188521	208653	205404	185944	2.25216e+06	2.56584e+06	2.23647e+06	1.21171e+06	1.29172e+06	21197.2	18015.9	17068.7	475327	597166	482589	444747	401914	534710	450201	78451.9	266328	1.58853e+06	499812
292.1293@11.089-rp	65274.6	63758.3	52404	55666	45384	47668.4	40483.6	39655	37994.1	38404.8	39265.3	29859.1	62844.2	89833.8	95836.7	63488.6	68304.1	126156	960481	1.18322e+06	613752	814359	717029	107474	93949.7	60926.7	99335.3	118763	93945.3	144891	131304	42176.7	48235.6	36878.6	48253.1	41460.8	41539
293.21062@1.655-rp	620027	509058	522813	420605	435282	512689	641160	893684	2.78507e+06	2.8248e+06	3.85734e+06	4.57431e+06	587109	470223	626364	401732	416359	322273	7.98545e+06	5.77939e+06	1.06589e+07	5.41064e+06	9.25392e+06	82542.2	71638.9	57833	2.2315e+06	1.40796e+06	1.69217e+06	1.94057e+06	1.26463e+06	335933	723078	294333	726197	299824	403334
EthylN-[2,2-dimethyl-3-(nitrooxy)propanoyl]cysteinate@1.83-rp	89290.4	76165.9	71114.4	86016.8	59798.7	81590	50512.4	44290.3	36867.4	83926.2	47414	100070	57549.1	98770.9	105743	87281.7	105508	167191	270930	1.59517e+06	174910	493551	1.15682e+06	15871	13465.5	12580.7	69432.6	119374	189133	170980	132700	78075.4	102980	65308.4	84711.3	209666	166841
295.04972@5.886-rp	40185	40019.6	37754.3	35215.9	33054.2	35047.2	988635	121945	146512	81126.5	920218	211853	195457	230051	127094	145306	100722	240883	1.46224e+06	2.27939e+06	735835	896621	756071	27808.4	26201.5	24200.7	310733	317407	363015	339927	278732	109835	115469	27768.7	84639	294969	180407
296.21373@11.312-rp	92487.1	82562.7	71545.7	68034	58596.2	76547.3	114309	226573	79260.5	107804	264127	72661.5	109438	95614.8	116777	84200.3	129774	118494	3.52509e+06	1.19627e+06	752160	651535	1.22026e+06	77405.6	17526.6	15433.1	263680	254891	271998	200190	295604	101756	109643	56142.4	138514	146697	101110
297.13231@11.88-rp	1.50401e+06	693697	612728	682620	760694	651862	334949	129859	874856	236284	179299	1.09217e+06	661877	1.924e+06	7.37074e+06	3.21352e+06	1.12327e+06	1.35974e+06	1.49314e+07	5.81167e+06	2.45332e+07	1.14859e+07	7.02327e+06	26709.6	24284.5	781276	3.77561e+06	3.71352e+06	3.6793e+06	3.64556e+06	3.63802e+06	586164	265992	223316	129589	339988	396747
2',4-Dihydroxy-4',6'-dimethoxychalcone@10.942-rp	94108	88803.4	74776.8	96273.9	71879.9	83298.9	50610.9	183935	105443	61190.9	112109	69091.7	90202.5	114888	128657	105305	101701	133458	196645	2.58595e+06	123459	1.09157e+06	506557	224421	210371	137864	248087	149703	193854	86629.2	154697	115154	145274	55692	180438	67035.8	57369.3
Azapropazone@6.903-rp	245162	369900	265108	122450	184463	225475	112311	200733	94328.6	102344	476807	187622	243900	205483	421866	254551	108837	287211	3.06362e+06	2.22707e+06	1.64384e+06	2.05343e+06	2.1467e+06	41751.3	35657.7	34263.7	563957	280975	391073	512556	366749	144044	373885	149484	341284	118512	97792
Mucronulatol@10.942-rp	97007.1	91539.1	77080.4	99239.7	231712	85865.1	62128.6	293409	105352	77256.9	95647.4	79320	92981.3	118427	132621	108549	104834	137569	1.471e+06	1.56038e+07	183602	5.79042e+06	4.28547e+06	231334	216852	142111	1.25815e+06	1.06459e+06	1.16044e+06	1.18658e+06	1.02154e+06	343015	177527	126789	468879	261426	218147
302.22454@12.564-rp	113897	112822	104706	94950.1	49788.7	31893	261271	217067	261196	472278	419051	288099	245260	420300	484357	262455	194994	368369	974427	778078	1.1291e+06	1.03042e+06	922599	21904.3	19158.4	17600.4	310749	342251	260238	321656	327215	179690	239051	123074	138587	153616	177061
303.07854@7.266-rp	33766.5	37043.6	29617.3	31733.7	29081.6	33366.6	103988	38286	24599.3	30556.3	76077.6	26342.5	68876.7	36532.9	58271.2	29089	31617.2	44049.4	208030	174676	253144	226229	1.60001e+06	22758.8	20699.3	18704.1	93113.2	89123.7	96615.6	91607.2	74701.5	33550.9	27036.4	23884.5	27023.5	105268	85689.5
305.11867@11.557-rp	122513	114629	115734	114264	89395.7	112471	445575	120530	164580	109923	160437	678728	123086	96316.2	112795	92699.4	112186	92768.8	1.96413e+06	2.65228e+06	1.53253e+06	2.80725e+06	412973	33431.9	27823.7	40023.1	246256	326758	308757	366641	212634	221874	105127	60098.8	97774.6	133198	148491
308.15233@12.876-rp	29869.9	30584.3	29667.3	27637.5	22553	28543.3	21801.1	24229.8	22260.4	27075.2	26512.9	24305.8	32320.2	33488.1	41447.4	29568.6	39031.9	27505.4	510802	547023	253266	382672	418449	18289.4	17453.3	14954.9	81607.5	58056.2	69678.7	46296.3	48460.8	26330.2	33016.2	21474.2	24643.1	31022.1	27063
311.16625@4.877-rp	106164	125185	96344.3	83937.6	71734.5	125918	66471.4	59800.2	68219.3	68019.8	49808.3	55623.7	112786	181433	388631	188832	209935	474663	3.03599e+06	3.62396e+06	1.30373e+06	1.36653e+06	1.83825e+06	44216.2	58832.1	47335.1	369113	515757	491621	386089	454620	68008.9	65573.3	49857.9	66120	61620.8	54495.9
Methylretinoate@11.318-rp	178503	158838	137643	130887	112730	147266	180434	635655	155001	219626	955606	241331	210542	238086	224661	161989	312415	296898	5.67923e+06	2.12732e+06	1.44356e+06	1.07267e+06	2.14303e+06	92839.2	33718.6	43958.6	468891	490207	536350	432473	599271	291906	254852	150173	209680	282223	230809
316.14656@2.224-rp	178995	138304	125903	166909	52123.8	118512	67345.3	73567.8	53187.3	121126	77323.2	69600.9	79094.2	78888.4	192328	154285	137682	208755	632948	1.08134e+06	275860	294544	472686	20955.8	18920.5	18159.7	83430.9	107931	134224	110234	117399	75737.8	54024.9	61346	125958	183819	211673
1'-Benzyl-3,4-dihydrospiro[isochromene-1,4'-piperidine]-3-carbonitrile@7.004-rp	49794.8	33674	36822.6	37309.6	32897.7	40060.9	31108.5	34912.3	30380.1	32705.4	36730.4	30541.3	35614.7	32663.2	53235.6	31390.8	32544.9	29720.1	141965	787882	899332	94699.5	113842	21508.1	22147	17608.8	73258.2	32525.1	29881.8	33874	42036.6	28687.7	32084.2	25795	29076.5	33483.3	31128.7
319.03677@3.669-rp	204080	74298.1	89446.5	87712.5	95238	68772	45106.6	46935.3	57699.3	68720.1	46892.2	42200.8	88719.3	65340.5	126864	107400	106933	105189	1.46239e+06	2.0813e+06	776466	751635	1.66874e+06	44842.2	39012.2	37997.9	288165	300155	269442	343856	222923	44661.4	48046	40786.9	47049.3	46024.2	42834.2
335.22141@6.626-rp	76484.1	36914.5	37259.7	36829.5	36070.6	36506.4	2.16048e+06	3.0473e+06	1.38948e+06	2.02715e+06	2.99912e+06	1.07608e+06	1.43676e+06	761453	457778	837172	320026	904145	1.77274e+07	33642879	1.09511e+07	9.33884e+06	1.43917e+07	18150.4	19018.5	15692.3	3.97081e+06	3.42591e+06	3.5151e+06	3.26915e+06	3.06904e+06	166652	70753.3	29099.3	95887.9	111362	319812
2-(2,5-Dioxo-4,4-dipropyl-1-imidazolidinyl)-N-(3-methoxyphenyl)acetamide@6.8-rp	56319.9	44673.2	40659.2	43586.1	38483.3	54849.7	31398	35147.1	30430.2	31926.5	32763.3	35907.3	43239.7	94514.3	59056.1	36215.4	77531.5	45014.8	348271	1.11382e+06	897666	199596	626657	24295.6	23472.6	19293.5	121303	136453	149986	110236	107171	35683	35670.7	27194.9	31454.6	51476.4	30746.1
353.02465@3.603-rp	173782	138180	154108	136683	121445	127903	87670.1	90047.5	83756.6	86929.7	87210.6	86970.5	105206	92048.2	90093.4	92053	99002.3	85849.6	245304	240452	5.81328e+06	606069	3.97851e+06	83397.9	72555.3	70668.8	276145	300393	215711	305495	265021	84179.8	89356.4	82969.4	87502.7	87755.6	82864.4
354.10851@7.07-rp	57788.5	47501.8	42773.9	41946.3	42842.9	44859.9	148220	84367.9	59981	60027	61560.1	786550	39980.5	75751.5	119271	81463.6	48485.8	76790.2	743505	231140	284108	201506	976103	21605	19058.8	17600.8	58858.7	81086.9	74343.8	67899.7	76306.6	26263.8	32737.9	23968	24986.9	43887	26397.5
N-[2-[[4-(2-hydroxyethylamino)-6-(1-pyrrolidinyl)-1,3,5-triazin-2-yl]amino]phenyl]acetamide@2.959-rp	131429	121542	109513	128415	82932.4	165682	162850	369748	113804	359620	155045	160711	157999	219922	196531	146338	188149	101112	917139	598787	355614	400862	577545	35701.3	31339.4	28754.9	190260	248674	192297	211324	206892	87871.8	137089	38049.5	138829	131439	109499
368.18453@7.499-rp	44941.3	39331.4	32850.8	30387.4	35575.4	35494.1	27850.8	43013.8	28489.2	35468.8	38606.2	33180.4	39237.7	34054	44778.1	36864.3	88341.3	37932.6	112018	753430	1.10334e+06	106713	90483.7	20047.5	18310	16921.4	32664.7	71692.4	84298.5	52372.8	67826.9	31194.8	36725.1	24927.9	32251.2	176868	32071.6
N',O'-Diacetylfusarochromanone@10.037-rp	183682	120928	136761	87999.1	72137	95707.4	103335	144092	78952.3	109286	152456	89790	428877	275935	226120	191424	302515	268206	1.33482e+06	283447	379379	1.19318e+06	933129	36347.7	29364.6	26526.1	245723	331390	234969	291701	326941	137355	186279	77333.6	137575	391614	543578
BruceollineK@10.535-rp	81548.8	62889.3	61738.1	54050.6	62416.3	71697.6	54758.1	89092.4	115025	74350.4	89445.7	57458.5	131787	75596.3	91952	72626.1	86949.3	63473.5	179567	115312	263689	256430	63132.3	14153.6	13374.5	11983.6	82889.4	85441.3	136472	129988	68084.1	84133.5	81332.7	43631.6	78248.5	103956	75333.9
3-hydroxy-16-methoxy-2,3-dihydrotabersonine@10.661-rp	545969	451240	452896	355594	362612	451800	605123	304689	167010	264555	306515	254537	301031	600329	970288	219801	297988	238579	1.64412e+08	276645984	1.37604e+08	1.44016e+08	1.60392e+08	75288	65189	56272.8	3.02918e+07	2.94202e+07	2.86913e+07	2.93478e+07	2.90769e+07	275380	274955	204244	282958	382121	423592
JerantinineE@10.888-rp	682033	550226	521666	527034	568057	492543	2.87495e+06	952186	465104	799515	849071	697070	894460	2.6786e+06	3.82323e+06	681874	802792	962908	6.05548e+08	1066056072	3.36824e+08	475483664	5.93773e+08	110217	100074	82668.9	1.20825e+08	1.0845e+08	1.13819e+08	1.1405e+08	1.09616e+08	799813	884118	421174	813726	1.02558e+06	2.23451e+06
387.19346@2.483-rp	122865	95466.5	70646.6	75667.5	80794.9	77713.7	51461.4	125750	39286.6	116602	100139	38031.8	190620	97408.9	81643.5	177884	113738	86680.3	755260	756281	940253	475457	361481	22570.4	21121.6	18562.5	99805	98971.3	133174	131809	132266	43889.1	189335	98841.2	149357	57102.4	41807.5
(-)-11-hydroxy-9,10-dihydrojasmonicacid11-beta-D-glucoside@6.875-rp	1.00554e+06	402197	444756	348676	590224	264057	43370.9	116964	82824	121138	76699.9	38768.4	894706	767307	430401	830466	688242	215574	5.82566e+06	2.29432e+06	1.27618e+06	2.27689e+06	2.30195e+06	29388.6	24646.7	20912.2	770725	774788	832875	908870	778858	148808	93807.1	38362.1	63316.7	95968	60569.2
N-[(Benzyloxy)carbonyl]-L-phenylalanyl-L-valine@9.901-rp	1.72244e+06	1.41123e+06	1.27819e+06	1.29987e+06	1.03718e+06	1.50637e+06	1.23166e+06	966578	831609	1.28302e+06	1.17765e+06	999265	649532	1.07889e+06	1.60645e+06	810553	993411	1.29756e+06	5.64492e+06	8.23539e+06	4.0484e+06	1.00128e+07	5.10244e+06	70378.1	58721.4	50294.3	1.12564e+06	1.49413e+06	1.41357e+06	1.07015e+06	1.27898e+06	713221	729294	337206	492081	1.30628e+06	929012
398.18482@10.883-rp	126582	100144	96352	120525	85846.3	120621	45235.1	59504.3	37171.5	50134	56046.7	36174.4	118508	166732	178840	132461	137883	165487	446583	1.45784e+06	307564	630966	415837	32539.1	27920	23855.6	91387.7	86789.2	93046.6	93095.3	198216	59590.6	62123.9	39956.8	58651.8	61696.2	46246.3
398.22045@11.505-rp	1.01095e+06	736230	406414	476239	331762	468128	287110	279037	108442	218140	225549	129853	627793	654453	1.01303e+06	528118	624792	794685	5.80917e+06	8.13561e+06	1.83447e+06	4.10496e+06	5.29294e+06	59202.7	46291.9	43589.2	911371	808286	920367	989930	828862	288175	288539	152255	280074	355131	212119
11-O-demethyl-17-O-deacetylvindoline@10.295-rp	140167	107294	108707	83619.8	80111.4	102206	109141	159380	84289.4	134132	160568	91907.6	272134	378802	347372	306749	301370	276250	876344	313037	1.38239e+07	954788	1.73223e+06	29446.1	25632.9	22573.2	540669	463334	700954	712176	549872	125148	170177	90416.2	160649	187160	158380
ReserpicAcid@9.897-rp	2.80143e+06	2.02369e+06	1.92722e+06	1.97858e+06	1.49289e+06	2.22999e+06	263365	1.38943e+06	294942	589070	430837	231920	2.67239e+06	2.52683e+06	3.10466e+06	2.18321e+06	2.18818e+06	2.18244e+06	1.06863e+08	8.31713e+07	4.66877e+07	1.08005e+08	7.21718e+07	89389.3	77114.4	64865.7	1.62742e+07	1.55241e+07	1.4056e+07	1.56796e+07	1.33152e+07	382619	384827	298195	908923	831355	675486
406.18732@10.884-rp	158592	129593	119097	139954	110559	140066	52527.2	69811.9	208253	101781	66997.3	110961	137613	193610	207670	153814	192631	192164	3.90185e+06	6.835e+06	2.01541e+06	3.61717e+06	3.6997e+06	45263.2	34443.9	30899.1	512254	392690	425320	398382	439940	69196.9	72138.6	46398	68106.8	125589	53701.4
406.18739@10.663-rp	243548	241929	224285	174977	170118	190861	66911.2	73937.9	179378	66577.5	69176	97813.6	74516.7	83221.5	76845.2	88172.8	122959	86617.7	1.39006e+06	1.56877e+06	981023	1.18734e+06	988969	38330.4	31102.6	26594.1	152633	141503	138226	124058	112357	60618.5	81459.7	61311.2	69230	117191	53942.3
Mevinicacid@12.262-rp	92794.9	99201.6	97560.8	86553.3	85076.8	103918	69021.2	153973	33446.2	48867.4	173792	90802.5	96336.2	105037	105845	72901.4	89100.4	143722	679525	643233	1.43815e+06	914346	1.24475e+06	24958.2	18573.4	49169.7	213846	119041	110063	154103	256012	125743	340097	90722.8	44818.5	255228	96948.6
Deacetylvindoline@10.809-rp	237072	222573	202953	229923	165191	208169	144396	176512	107346	165670	197885	140234	207847	194843	214729	164682	186614	207020	1.67227e+07	324702	1.8796e+06	2.25794e+06	2.09142e+06	55278.4	44553.5	41545.6	681972	500282	578799	515566	714821	161728	187574	117891	203272	222932	186950
420.3098@11.246-rp	96472.3	74077.1	40911	579421	31781	60497.6	52216.3	76431.1	69672.5	270209	220475	1.68448e+06	236101	438874	427048	233411	261889	181067	2.54804e+06	2.52616e+06	1.81625e+06	1.5338e+06	1.28718e+06	21192	15182.3	13917.9	450175	249870	369820	419564	464535	357366	856903	138224	88093.6	1.71609e+06	303994
N-[(2S,3S,6R)-2-(hydroxymethyl)-6-[2-(4-phenyl-1-triazolyl)ethyl]-3-oxanyl]-2-(2-pyridinyl)acetamide@10.72-rp	161507	118356	128875	109404	91647.7	130039	191404	165010	92909.4	143459	156630	109501	169719	144459	173934	138016	170592	132809	139883	1.13086e+06	263221	457539	1.49088e+06	27840.5	24779.7	21474.5	160354	137141	215107	150275	135680	132112	171665	77319.4	142300	208607	159010
422.15125@10.885-rp	121625	94816.1	79869	75523.6	71334.6	84595	73718.4	119556	61869.3	119342	105255	68276.6	132249	121832	127438	94720.1	119428	93822.5	4.87967e+06	8.21349e+06	2.20241e+06	3.83949e+06	4.40322e+06	16612.9	15147.1	13608.3	840150	631740	782808	773642	490374	95131.6	119194	58546	114367	149698	115063
447.20118@10.662-rp	355917	395580	427178	143452	201758	236322	72113.3	40651.1	27935.3	36604.4	40162.6	97534.4	206549	399372	699054	135443	229664	278730	2.77373e+06	4.59271e+06	2.61387e+06	2.75423e+06	3.23347e+06	21074.1	17100.2	14621.5	747636	850450	683343	816543	994421	54989.1	68753.6	36640.3	41887.3	145859	217054
447.20119@10.892-rp	305097	400138	178307	185535	201758	123094	84470.1	39344.8	26795.6	33568	39830.4	30600.5	491582	418615	125018	357293	122992	293340	9.40315e+06	1.07251e+07	4.84773e+06	5.8814e+06	8.86536e+06	26099.3	19860.8	17816.8	4.11009e+06	2.74281e+06	2.83271e+06	3.17472e+06	3.29156e+06	54989.1	43764.4	28309.9	63318.4	75144.6	75349.6
447.22869@11.584-rp	127387	111084	108035	103663	146876	105232	158688	77971.9	48422.5	75911.5	79138.6	60198.5	78410.2	107832	87627	73669.4	89379.1	111599	88580.2	808293	209216	356187	1.2668e+06	26568.8	22111.8	20537.1	74783.1	142558	78136	91230.7	116426	63941.6	78363.1	44266.2	62289.3	94802.7	67584
463.19637@9.896-rp	271991	210872	220894	219229	178261	245978	46686.4	109234	38987.7	58267.3	63595.3	45129.1	101177	67911.1	94065.9	150890	99674.8	63642.3	1.9114e+06	1.61411e+06	759093	1.63633e+06	1.34111e+06	22074.1	17829.5	15974.2	344179	309898	347336	306521	273785	78993.4	66130.9	47577.5	66423.3	73494.7	55601.1
463.27521@12.862-rp	3.06003e+06	2.06739e+06	1.94014e+06	1.68657e+06	1.62646e+06	1.74909e+06	3.41441e+06	1.45395e+06	2.1575e+06	732979	2.05456e+06	3.07872e+06	3.13442e+06	1.17353e+07	1.72714e+07	1.03455e+07	6.49137e+06	9.17431e+06	3.23919e+07	2.20215e+07	3.26381e+07	2.29831e+07	1.43658e+07	29111.6	40509.2	708285	7.25596e+06	7.42479e+06	7.53306e+06	9.62459e+06	7.01727e+06	3.76415e+06	2.14426e+06	2.03687e+06	1.51872e+06	2.80722e+06	3.29606e+06
N-[6-amino-2,4-dioxo-1-(phenylmethyl)-5-pyrimidinyl]-2-[(1-ethyl-2-benzimidazolyl)thio]-N-methylacetamide@10.249-rp	131002	99263	101599	82554.6	74873.3	90784.5	102005	148959	78778.1	134765	150069	85898.2	140242	120018	141219	109528	129853	107696	630034	111895	2.39901e+06	585702	2.05399e+06	27520.8	23956.9	21097.2	124977	221415	119820	116944	112371	116966	138962	80531.3	148505	171547	135009
1-(Adamantan-2-ylamino)-1-oxo-2-butanyl4-(methylsulfonyl)-3-nitrobenzoate@10.488-rp	333083	324554	216650	276274	193052	268685	147989	278662	112617	169548	209368	122744	197731	188251	706495	163244	179862	149546	4.40424e+07	4.90474e+06	1.24131e+08	3.04905e+07	7.89848e+07	54816.4	42539.8	39952.4	9.68325e+06	8.37468e+06	8.98605e+06	9.10645e+06	8.82543e+06	148637	196866	126683	189719	231194	169848
466.20872@10.662-rp	124581	123753	114727	89505.1	87019.5	97629.9	33482.6	37821	186223	34056	35385.2	89311	38117.1	38399.7	39308.2	60576.9	31445.4	35364.2	1.19929e+06	862269	637985	661135	635270	19606.9	15909.7	13603.5	62518	59576.6	70937.2	67409.1	59507.7	31007.8	41668.6	31362.2	38971.1	89022.9	27592.8
3,3'-{[(2-Dodecylphenyl)methylene]disulfanediyl}dipropanoicacid@10.894-rp	120562	103266	95796.3	106393	84046.8	106714	42879.6	137891	59921.2	65710.1	132400	60679.5	115558	147182	164822	129335	130289	170972	397154	825984	251980	523363	357846	78773.9	65334.1	56433.4	228574	99139.2	124317	107838	158112	92712.9	124630	68184.2	72183.1	145215	91706
469.20565@6.659-rp	71898.7	33408.5	35824.7	30298.5	28376.7	32186.5	43075	65402.6	55612.3	50895.4	97751.9	128772	77335.9	51472.1	58847.2	73148.1	69559.4	61310.5	362399	733576	679126	96315.3	475754	19102.5	19184.1	15548.9	68940.8	55799.8	53792.2	69440.7	86615.9	45769.5	50088	25346.6	35370.8	71370.4	44889.8
469.22184@10.891-rp	97644.5	79789.9	77586.8	86169.4	68070.7	86429.2	32839.8	42982.9	28611.9	35843.3	41250	26976.5	93592.2	119205	133492	104750	105523	138473	1.34773e+06	1.592e+06	566964	741413	1.24593e+06	27868.4	21207	19024.5	298932	229765	248477	299402	213998	42604.3	46730.9	30228.8	47838	44977.8	39106.4
476.21623@10.882-rp	83504.9	68235.8	58911.6	73691.5	58213.6	73750.1	27657.6	36758.7	22727.4	30653	35276.7	22334.8	72458.4	101943	109346	80989.4	90242.8	101182	462813	1.31127e+06	255697	668078	446766	23832.8	18136.1	16269.6	107479	80508.8	116586	58203.9	136672	36434.9	37983.8	24430.4	35860.9	37722.3	28275.9
478.17793@11.055-rp	128812	138735	86874.2	174106	96298.9	108422	84556	65759	94168.5	78897.2	76547.3	75715.9	80229.6	76115.1	79803.1	133222	67203.5	115625	504847	83006.1	988600	382421	990740	363191	296983	199933	99718.2	91710.3	85532.8	96576.6	126471	80869.8	85202	87772.5	94340.5	85898.8	88630.1
479.26995@11.805-rp	6.50583e+07	3.51003e+07	3.60056e+07	2.15587e+07	4.12681e+07	5.02758e+07	3.00456e+06	3.57211e+06	4.10593e+06	1.78538e+06	3.51935e+06	1.5913e+07	1.58146e+07	3.63994e+07	305612379	9.08199e+07	3.04177e+07	4.11012e+07	4.07737e+08	1.44472e+08	9.21408e+08	3.68506e+08	1.95168e+08	361612	449594	5.45001e+06	9.29218e+07	9.309e+07	3.62886e+07	5.52828e+07	1.2541e+08	1.63324e+07	3.18608e+06	2.23379e+06	2.51716e+06	8.72203e+06	6.01095e+06
BlestriareneB@10.3-rp	282830	181797	156913	161881	122694	179684	248066	916422	234792	296676	942663	244020	505245	371596	339940	692968	736911	587598	4.50584e+06	520988	116182495	3.79323e+06	1.54203e+07	58541	46153.5	41352.2	5.04593e+06	4.71258e+06	4.66455e+06	5.34147e+06	5.28353e+06	1.16231e+06	1.06034e+06	396811	382831	1.10398e+06	340685
480.15747@8.341-rp	58233.5	51261.3	52595	48520.3	43922.4	47680.7	76634.7	118846	54207.6	92374	119816	90458.1	90322.3	77962.9	59821.3	73079.8	57095.4	114619	1693321	1.15951e+06	888015	1.12508e+06	1.48364e+06	24217.4	19885.2	18496.6	196876	214473	150358	114096	180605	69876.5	68331.7	34051.7	106711	99525.4	82065.9
480.15755@9.061-rp	77424.7	68877.7	55337.5	61968.6	48014.6	68811.5	43310.4	60625.7	38204	53913.4	51980.7	41186.6	90988.8	78033.6	70714	71589.7	69363.4	66250.8	490430	720172	191013	444293	459291	32213.7	21504.5	17284	86533.2	52156.1	132297	55284.7	86191.2	45451.9	57346.7	39980.2	54929.8	61502.7	54170.8
481.28583@12.864-rp	3.84914e+06	2.63541e+06	2.34227e+06	2.20367e+06	2.07709e+06	2.32356e+06	4.13506e+06	1.83062e+06	2.99679e+06	945412	2.69299e+06	3.85195e+06	3.68753e+06	1.56874e+07	2.27605e+07	1.23306e+07	7.62257e+06	1.05331e+07	4.40542e+07	2.98657e+07	4.42582e+07	2.84642e+07	1.77529e+07	61872.2	69377.6	920568	8.99655e+06	9.41855e+06	1.04047e+07	1.11855e+07	9.66413e+06	5.28206e+06	3.16578e+06	2.5166e+06	2.01787e+06	3.69959e+06	4.26382e+06
485.23036@9.482-rp	67045.7	60208.4	57918.8	49483.7	45532.4	55059.7	285666	63434.8	32805.3	49399.8	53366.3	46598.3	69881.3	73498.7	130815	79875.6	158812	122617	203824	979288	246958	363069	975154	23083.6	18296.3	16631	83860	126793	133340	138016	98846.9	39226	44871.3	24035.2	37710.1	55392	36960.9
488.22642@8.199-rp	212832	174226	152137	129744	86021.8	126836	61904.5	110104	136952	83335.4	89031.5	281285	116906	283656	222410	69957.9	245047	287110	581315	292107	1.52727e+06	541986	386530	16243	14492.4	13523.1	136455	66073.4	100991	99866.3	92351.4	255062	88996.2	168549	139113	132587	132162
499.27562@11.885-rp	990300	601325	759362	490813	729357	528875	138878	77144.9	240632	81270.8	66490.7	289295	374199	387743	3.30165e+06	1.45647e+06	338356	624576	5.46137e+06	1.54307e+06	9.35092e+06	3.72289e+06	2.61194e+06	35370.6	32159.1	135793	1.28172e+06	1.33346e+06	1.19735e+06	920376	1.0849e+06	163029	96717	84564.5	103303	150421	236506
499.29674@13.146-rp	73376.7	62274.6	56889.8	69303.6	60171.3	60556.8	71545.1	65025.9	53309.9	54806.8	90578.7	75821.6	50806.7	50814.7	119637	53997.4	225762	60957	291506	962449	179919	280133	170138	39770.2	41535.2	28224.4	69218.9	122212	112694	70113.3	144000	175089	96229.5	47774.2	60387.6	129657	203069
500.14621@10.891-rp	93228.4	76181.4	74077.9	82272.3	64992.2	82520.4	31354.6	41039	27317.9	34222.3	39384.4	24935.5	89359.4	113814	127455	100013	100751	132210	4.67075e+06	4.28052e+06	1.66976e+06	2.06037e+06	4.07752e+06	26608	20247.9	18164.1	1.16342e+06	766979	740133	1.3503e+06	620629	40677.5	44617.4	28861.7	45674.5	42943.6	37337.8
502.14119@10.658-rp	126407	125567	116409	90817.5	111106	125996	33973.6	38375.6	26371.5	34555.4	35904	23489.4	38676	38962.7	39884.5	31647.7	31906.5	35882.7	1.0953e+06	1.10246e+06	603386	660234	890271	19894.4	16143	13803	151288	106317	141694	292517	102071	31462.5	42279.5	31822	39542.6	32303.6	27997.4
510.16839@10.202-rp	57540.9	51793.8	51576.5	43848.1	38951.8	47500.8	57641.5	73534.4	108369	60441.4	75044.2	42964.5	66619	57235.8	62638.3	68131.3	62200.1	55020.5	550201	59056.9	4.8559e+06	99547.1	1.36382e+06	27726.2	22036.7	20315.1	126033	157171	115092	118953	152641	60357.1	73160.6	41347.1	68130.9	70107.3	56419.1
514.32315@1.846-rp	341718	348884	164481	84688.9	186580	172013	40267.5	61023.4	36786.4	51079.2	64936.6	91442.7	195567	542675	240956	180816	342605	294965	1.27143e+06	2.80004e+06	2.76645e+06	732415	772317	21868.4	20679.1	17780.6	402512	355384	431881	400854	384420	42810.1	78955.2	36100.4	65661.7	95797.4	105316
515.29223@12.279-rp	4.64998e+06	5.11124e+06	2.96056e+06	3.13893e+06	3.05362e+06	3.36725e+06	3.12762e+06	756987	1.92535e+06	951757	3.95468e+06	6.94274e+06	6.54374e+06	3.8225e+06	1.62613e+07	5.78184e+06	2.78049e+06	3.41874e+06	3.3689e+07	7.98287e+07	5.29887e+07	3.93375e+07	1.49718e+07	68474.3	70186	2.12207e+06	9.98357e+06	1.14302e+07	1.03271e+07	1.10635e+07	9.7092e+06	3.86002e+06	5.25761e+06	651990	1.27727e+06	3.65143e+06	4.69921e+06
Taurohyocholicacid@11.573-rp	1.20881e+08	1.23272e+08	4.80411e+07	5.34795e+07	1.82772e+07	6.68524e+07	4.18961e+08	53483713	1.40496e+08	4.2608e+07	1.98643e+08	4.6479e+08	1.29024e+08	1.55166e+08	1.05906e+08	6.52549e+07	9.62808e+07	1.22638e+08	1927648680	3622861303	1969112114	2409357761	775485017	1.87894e+06	2.13552e+06	3.74844e+07	4.63081e+08	4.97774e+08	4.43078e+08	442805209	427110468	2.46684e+08	1.56587e+08	4.20599e+07	5.53943e+07	1.4145e+08	1.90943e+08
Tauro-?-muricholicacid@11.662-rp	7.72827e+07	7.90124e+07	7.42176e+07	6.00062e+07	5.38425e+07	5.87108e+07	2.99836e+08	4.84928e+07	1.25346e+08	3.87077e+07	1.80645e+08	4.2384e+08	5.65877e+07	1.18209e+08	3.90424e+08	1.43675e+08	8.05328e+07	9.75287e+07	2754373444	3.49345e+08	2.96192e+08	2820632473	5.65143e+08	1.47799e+06	1.76035e+06	3.21671e+07	3.84138e+08	4.19111e+08	3.75831e+08	3.68089e+08	3.63224e+08	228512795	1.42404e+08	3.84597e+07	4.93602e+07	1.2798e+08	1.72222e+08
516.29369@11.761-rp	1.59328e+06	498049	438987	432541	478945	551352	136534	121777	93665	121959	831203	385048	937296	887373	1.43726e+07	1.10955e+06	1.08127e+06	885990	2.98582e+07	9.30674e+06	5.27349e+07	2.16533e+07	1.38386e+07	46902.1	44082.8	136012	269009	534528	336355	851255	395793	116115	133896	104811	288852	146416	135615
3-O-(alpha-L-olivosyl)oleandolide@11.641-rp	2.69341e+07	1.89729e+07	1.7438e+07	1.45138e+07	1.31132e+07	8.54579e+06	6.91491e+07	1.20886e+07	3.50702e+07	9.02269e+06	4.12158e+07	1.00409e+08	1.1771e+07	2.69265e+07	1.21756e+07	4.04785e+07	1.83215e+07	2.10328e+07	5.97442e+08	7.91754e+07	3.98278e+08	6.81314e+08	1.30292e+08	701991	393692	7.59318e+06	1.25308e+08	1.25762e+08	1.22585e+08	1.19604e+08	112700590	3.81228e+07	2.70109e+07	9.29881e+06	1.19853e+07	2.32003e+07	3.8819e+07
516.29585@11.477-rp	1.01756e+07	1.27492e+07	8.43942e+06	5.14101e+06	3854123	2.70062e+06	1.88653e+07	1.20886e+07	2.87365e+07	483237	7.7157e+06	5.29444e+06	6.87755e+06	1.0283e+07	8.49408e+06	4.54272e+06	6.57343e+06	9.55288e+06	4.25e+08	7.86068e+08	673525141	5.40279e+08	1.6953e+08	39125.8	385685	6.14687e+06	9.30211e+07	99695746	1.0755e+08	8.65347e+07	8.42666e+07	4.68234e+06	4.52826e+06	9.29881e+06	1.19853e+07	2.99567e+06	7.69246e+06
517.28828@11.557-rp	1.3178e+06	1.08422e+06	546366	742278	291128	692803	9.71961e+06	851325	3.9837e+06	912418	5.45941e+06	1.05171e+07	929688	2.01978e+06	7.79899e+06	637351	837339	984834	4.34406e+07	4.73102e+07	5.52569e+07	4.37704e+07	9.06927e+06	41782.2	31155.4	813155	1.17714e+07	1.29065e+07	1.22887e+07	1.04981e+07	9.3642e+06	4.26871e+06	2.70732e+06	860724	1.2468e+06	2.24491e+06	4.48193e+06
LucidenicacidP@11.849-rp	2.23955e+06	895272	1.07157e+06	1.049e+06	603662	313488	1.65898e+06	1.55748e+06	1.39673e+06	851514	1.1825e+06	2.78332e+06	395845	1.64303e+06	1.01476e+07	3.96607e+06	1.84881e+06	4.31864e+06	4.48879e+07	1.58833e+07	5.38359e+07	3.15727e+07	1.62028e+07	51177.9	53747.1	617745	4.48737e+06	4.6685e+06	2.67044e+06	4.05449e+06	1.17414e+07	1.65826e+06	1.79306e+06	798513	2.67725e+06	1.95161e+06	1.75793e+06
522.33012@12.679-rp	45131.4	54127.9	44917.6	37068.3	34329.5	36123.5	28845.9	38938.5	29066.3	39305.6	46549.7	441417	51199.4	44444.1	50445.5	49380.8	38584.6	43580.4	719348	999174	672908	711441	623261	16466.7	15970	13869.1	55014.4	92636.7	68328.8	95517.3	102936	30193.7	42609.7	23656.6	38857.7	35815.7	32383.5
2-Hydroxy-3-(phosphonooxy)propyl22-methyltricosanoate@11.123-rp	191242	186561	135824	129757	114630	131946	130032	161808	341261	127233	155934	1.81139e+06	212907	271819	301785	211495	206463	296037	2.18225e+06	2.69019e+06	1.50908e+06	357485	2.62966e+06	55977.2	46661	33549	250658	305589	170638	245658	206362	120572	153982	82156.6	162051	199798	165495
529.27154@9.983-rp	826769	692843	1.02398e+06	584266	747305	488973	3.99499e+06	318362	230256	148633	3.32547e+06	2.77906e+06	654184	1.72039e+06	1.5813e+06	637910	596005	1.21345e+06	1.67189e+07	1.67312e+07	1.97633e+07	2.82769e+07	1.7672e+07	46954.9	40294.4	35297.6	3.6955e+06	3.97138e+06	3.74011e+06	4.18944e+06	3.71773e+06	449489	660884	96357.3	175233	181750	655519
(3?,5?)-3-{[N-(4-Aminobutyl)glycyl]oxy}-5,14-dihydroxy-19-oxocard-20(22)-enolid@11.765-rp	6.70148e+06	4.25111e+06	3.90021e+06	2.70307e+06	3.22025e+06	3.1238e+06	2.84857e+06	330912	1.37133e+06	804923	1.51125e+06	4.27218e+06	3.89597e+06	6.26316e+06	2.74015e+07	1.42547e+07	4.02328e+06	7.22461e+06	7.05704e+07	1.71247e+07	8.73316e+07	5.2473e+07	3.67519e+07	78682	106861	3.07486e+06	1.52174e+07	1.41654e+07	1.30509e+07	1.48396e+07	1.40983e+07	1.33291e+06	981138	1.10783e+06	303802	1.35964e+06	3.03391e+06
533.32091@11.567-rp	468741	258280	133477	126463	87826.1	128377	568760	104437	313526	106570	268443	1.02851e+06	572408	124528	407261	885061	394798	522729	3.18504e+06	3.92803e+06	4.95137e+06	3.93716e+06	1.06214e+06	32412.4	26975.1	242865	801355	817200	735237	821113	235928	280185	169814	58266	90765.6	118756	187341
533.32093@11.869-rp	1.74573e+06	920310	943831	765069	880901	735702	314223	142206	854911	166331	157667	683877	418899	1.44624e+06	7.29716e+06	3.24479e+06	812450	1.6e+06	1.65406e+07	5.10276e+06	2.66655e+07	1.25291e+07	9.20993e+06	29079.1	26438.8	810148	3.67538e+06	3.85203e+06	3.97101e+06	3.46911e+06	3.56723e+06	657662	219323	232522	82970.7	263487	453468
533.33316@7.12-rp	76700.8	49086.3	49614.5	48971.1	47342.8	53274	32231.7	37335.5	31467.2	34818.2	39223.7	36846.3	43313	36519.7	112794	79978.4	43579.8	34969.1	78916.3	1.15526e+06	2.33722e+06	221325	64141	23084.1	22080.9	20222	37441.7	41420.2	34996.4	37947	50093.3	32890.7	36015.3	29796.1	31324.1	36082.7	36414.2
534.26506@11.549-rp	88656.9	83171.3	77173	69765.2	64862.6	77185	54035.2	78159.6	44725.2	79756.3	72253	104135	89307.4	69883.8	81840	67259.6	81398.1	67309.9	439888	934614	588417	949948	60928.9	24257.1	20187.9	18750.2	68276.4	70056.2	65457.5	81925.2	64589.1	60993.6	76276.8	43605.7	70850.3	88875.8	71813.9
535.29588@12.641-rp	128475	126062	61224.2	84212.5	76829.8	65182.4	133472	46249.5	29685.4	42881.8	92868.3	155084	337676	262496	77767.3	83053.1	204979	286009	428367	445126	832693	588558	511673	23221.6	21767.6	19024.4	212485	214186	168735	160177	229683	58412.1	46019.4	32244.7	48830.9	40020.1	38752.9
537.27287@11.765-rp	554623	521781	459905	453152	417407	577624	424342	127580	679532	127770	135780	1.09243e+06	161091	472844	1.90609e+06	1.08687e+06	357469	438962	5.02872e+06	1.52964e+06	7.71962e+06	4.10274e+06	2.71708e+06	49137	46183.4	1.30568e+06	947589	1.15084e+06	1.01847e+06	1.15631e+06	1.26792e+06	403055	161786	94551.5	118844	153393	302137
541.29292@12.053-rp	100274	114524	101380	88509.8	78509.9	83283.5	404083	73122.7	59960.5	55457.3	206994	52166.4	95930.3	117399	382222	85423.8	96583.5	246546	767414	6.27207e+06	1.47603e+06	2.13199e+06	7.35149e+06	30312.9	21927.7	20401.3	769400	536596	726654	649357	864000	52882.7	50225.8	123326	59423.7	139304	49927.4
542.29839@13.004-rp	31390.8	30716.6	28044	28652.5	26236.3	30544.8	22010.2	32241.5	23286.1	31137.6	28452.3	32777.1	28809	37886.5	34039.2	28219.5	30471	96262.2	480923	339146	876869	259645	234350	17010.4	15162.4	13930.3	65409.9	80408.5	60111.8	67771	55858.4	33246.2	41755.7	22229.1	32843.9	33993.4	28307.4
1,5-Anhydro-1-[3-(3,4-dihydroxybenzoyl)-2,4,6-trihydroxyphenyl]-6-O-(4-hydroxybenzoyl)hexitol@9.634-rp	184241	180534	159478	147808	137042	158778	111287	173840	103555	131147	143728	105183	166528	168866	207419	131082	162608	139644	9.87345e+06	1.33327e+06	3.78805e+07	1.13782e+07	5.09136e+07	58008.3	49066.2	44393.9	3.19008e+06	3.02748e+06	3.40872e+06	3.19821e+06	2.96049e+06	107042	127098	78518.2	135720	141531	108286
552.31763@7.885-rp	76930.4	48233.8	51075	47149.2	48797.6	47533.1	138197	130409	532507	310391	149161	466010	92841.1	74144.5	130029	67461.1	95992	79932.3	891689	2.06939e+06	1.12122e+06	1.02628e+06	481821	21743.7	18683	17151.6	279195	290059	170855	242462	249732	684886	169667	46286.1	141803	347075	387385
553.23753@11.819-rp	3.13621e+06	1.56975e+06	1.34919e+06	1.34117e+06	1.53529e+06	1.27948e+06	266164	329000	220291	290110	379374	427816	1.23499e+06	3.97715e+06	1.58643e+07	1.06601e+07	2.34335e+06	3.06447e+06	3.36024e+07	1.21599e+07	5.07402e+07	2.56762e+07	1.5241e+07	114858	104429	431552	1.14704e+07	1.12671e+07	1.12325e+07	1.16354e+07	7.58908e+06	311941	310320	326387	249503	801876	822218
557.15968@10.892-rp	79211.2	64727.3	62940	69902.4	55220.4	69958	26235.5	34080.8	23210.6	29076.8	31352.6	21186.3	68732.7	96701.6	103724	84975.4	85602.6	112332	628576	732839	315211	419645	532664	22607.4	17203.5	15433.1	68091.3	89766.7	74451.7	55211.1	57810.5	34561.5	36030.7	24522.2	38807.2	36486.9	26822
558.3061@13.79-rp	107631	82057.1	79248.9	67208.6	55021	68844.1	141942	132002	140495	83475.5	89893	448140	117923	558808	1.1062e+06	217534	137998	247232	2.1814e+06	1.0332e+06	1.58325e+06	1.31102e+06	1.375e+06	38370.8	24863.1	22382.9	302726	313481	254202	381737	268971	92143.6	97652	53614.1	64115.7	83479.9	89434.9
558.33823@5.707-rp	56618.7	49918.2	55034.6	46482.6	52105.5	49526.1	39613.8	42162.8	55867.8	51034.7	40680.5	202733	350759	73914.3	229374	64088.8	57417.8	52660.9	1.0419e+06	928683	656633	676730	1.66127e+06	37149.9	37653.4	30086.2	245000	215714	268879	232379	245028	176450	81186.8	131733	42771.6	76071.8	204176
560.11518@9.407-rp	248144	248479	215773	199047	221239	226503	180679	204073	166969	167363	176044	176512	227261	217405	239245	198803	245038	209587	2.10147e+06	177375	1.84395e+07	2.58211e+06	1.01042e+07	215696	163770	142652	1.00698e+06	883030	881396	1.0188e+06	851509	189143	184814	138787	164733	191978	175254
(4E,6Z,10E)-20,22-Dihydroxy-13,14,17-trimethoxy-4,8,10,12,16-pentamethyl-3-oxo-2-azabicyclo[16.3.1]docosa-1(22),4,6,10,18,20-hexaen-9-ylcarbamate@12.997-rp	40244.3	38395.9	39064	36941.6	29891.5	34811.9	92333.2	200381	46633.5	113620	197043	57326.4	92094.3	197130	61886.6	48577.1	52480.7	242369	1.98618e+06	1.45863e+06	2.7812e+06	696346	899477	24754.9	17746.2	15638.4	230322	207071	216479	317589	273800	151366	232260	42921.5	169644	261609	147121
Laxifloranone@13.234-rp	258706	601967	555943	687375	313900	228095	186480	402048	785759	348485	438522	4.12579e+06	147148	166244	190347	156121	148858	155631	1.29075e+07	1.82752e+07	1.1614e+07	1.03629e+07	1.21088e+07	62480.3	52406.8	49094.3	2.42876e+06	2.1253e+06	2.41508e+06	2.3899e+06	2.53155e+06	447665	589904	144947	488032	523646	588355
563.28214@1.585-rp	189949	155953	160167	230416	133352	157066	132218	242156	113258	142201	218162	117239	168100	147648	126410	116432	164108	113816	585952	2.61428e+06	2.64766e+06	333024	332923	24611	21947	16933.9	290395	229836	211991	300807	318119	79042.5	143696	61876.4	182174	70673.8	67108.3
568.27415@7.749-rp	40395.4	31728.3	28956.5	29750.7	26694.8	32710.3	43900	64480.5	29130.9	60063.5	58123.2	246847	45833.5	76056.2	37111.6	71864.7	42114.3	45672	393434	806582	829000	343476	662320	21223.7	16485.1	14653.7	84539.3	83602.5	78255.2	58676.1	105824	32383.4	39347.7	22822.1	30865.6	42748.2	37179.6
569.20949@11.816-rp	1.39361e+06	759639	614266	687621	714770	691002	284802	254887	855982	255267	281671	879108	485015	1.40886e+06	4.79405e+06	2.55129e+06	735935	1.00104e+06	1.29594e+07	4.55638e+06	1.37065e+07	9.93889e+06	6.71466e+06	98169.1	89255.8	432241	2772604	2.6953e+06	2.75324e+06	3.34728e+06	2.53922e+06	564081	260562	168963	219056	301869	334708
Taurochenodeoxycholate-3-sulfate@12.065-rp	1.00957e+06	306008	657023	364833	608088	348218	6.03828e+07	413817	1.80222e+06	143844	1.02053e+06	3.56884e+06	374587	1.22979e+06	904770	1.50642e+06	702701	485054	8.11189e+06	1.20313e+08	6.08744e+06	4.98089e+07	1.99737e+07	74914.9	51957.7	202690	1.28177e+07	1.33512e+07	1.32619e+07	1.18706e+07	1.79606e+07	2.32838e+06	600360	1.81541e+06	403762	880997	1.67173e+06
581.30088@12.853-rp	490222	401567	378667	67300.4	112305	415477	232832	376020	259571	91985.1	221907	186359	112730	440998	910640	551617	198699	307117	3.19966e+06	1.84232e+06	2.65378e+06	1.30921e+06	761518	36090.3	25777.6	29366.3	577463	470334	546746	569558	584348	355069	123490	181398	157771	286060	423331
588.29377@11.008-rp	313840	288821	221430	308529	218579	252483	228152	749347	2.42134e+06	1.85805e+06	1.24959e+06	4.39534e+06	2.66404e+06	1.56692e+06	624646	1.39943e+06	1.1785e+06	1.45522e+06	1.07032e+07	2.35463e+06	1.18626e+07	4.36527e+06	4.5888e+06	492740	422589	293880	1.40832e+06	2.24299e+06	2.04959e+06	2.65818e+06	2.03981e+06	573712	296352	193425	297180	487230	474868
594.26444@11.834-rp	1.45424e+06	693697	612728	682620	794468	651862	334949	129859	874856	236284	179299	1.16793e+06	675631	2.07515e+06	7.33903e+06	3.2842e+06	1.15886e+06	1.47095e+06	1.56756e+07	5.80752e+06	2.53468e+07	1.25125e+07	7.28131e+06	33016.9	30019.1	781276	3.67012e+06	3.56583e+06	3.69173e+06	3.73205e+06	3.49016e+06	612049	265992	227711	129589	339988	403226
Ergostine@12.265-rp	136970	136253	145617	108377	114408	130120	62230.2	61045.9	45042.9	62053.4	119173	48183.1	325511	188223	637655	163306	111566	1.38282e+06	3.912e+06	1.48419e+06	6.35013e+06	569455	1.21925e+06	31251.2	23256.5	20833.4	557168	883185	243945	380801	437847	51106.7	64587.3	39247.5	56119.1	59788.5	54284.7
597.29541@11.874-rp	4.68096e+06	1.72064e+06	2.09485e+06	1.8219e+06	2.78867e+06	2.36229e+06	1.19726e+06	340187	2.77972e+06	544578	473308	3.58267e+06	2.12255e+06	6.49123e+06	1.80665e+07	1.18942e+07	3.56659e+06	5.33241e+06	3.80278e+07	1.95968e+07	4.34605e+07	4.01132e+07	2.53373e+07	43237.2	52973.4	1.51402e+06	1.22709e+07	1.34165e+07	1.2896e+07	1.19848e+07	1.21154e+07	2.25905e+06	819124	655970	347716	826681	1.34844e+06
597.29543@11.604-rp	1.04021e+06	999512	489902	687039	363165	732229	3.65955e+06	433490	1.9799e+06	400513	1.8881e+06	5.75205e+06	727553	758532	1.31106e+06	891815	660958	777384	1.03636e+07	1.27729e+07	2.11922e+07	1.84633e+07	4.5104e+06	34950.2	39466.7	814234	3.45396e+06	2.98858e+06	2.65757e+06	2.3022e+06	2.88064e+06	2.10189e+06	1.50687e+06	438808	380367	976348	1.82312e+06
598.29849@11.827-rp	1.15891e+06	859007	905421	773730	815361	691656	997799	277281	1.13029e+06	163130	373137	2.54414e+06	922648	1.48468e+06	5.46073e+06	2.70459e+06	851910	1.0619e+06	9.45368e+06	5.62076e+06	1.27915e+07	1.12403e+07	6.64978e+06	71849.8	49391.8	530384	2.94421e+06	3.23256e+06	2.94358e+06	3.05473e+06	2.86405e+06	937303	372331	148634	126000	270400	658027
601.23624@12.975-rp	245416	243048	266018	275509	236376	284263	472694	380076	263363	391757	328048	304965	527070	2.83612e+06	2.89181e+06	1.08627e+06	1.37447e+06	1.38782e+06	4.22099e+06	3.08878e+06	2.61931e+06	2.59944e+06	2.12267e+06	218163	184159	112089	1.02729e+06	961519	946708	918979	965169	318364	354683	237530	277399	298645	325030
(5,5'-Bi-1H-Naphtho(2,3-c)pyran)-4,10,10'-triol,3,3',4,4'-tetrahydro-7,7',9,9'-tetramethoxy-3,3'-dimethyl-,4-acetate@10.943-rp	98380.5	92835	78171.6	100645	75143.2	87080.7	52908.6	293409	105352	77256.9	95647.4	79320	94297.6	120104	134498	116223	106319	139517	1.41906e+06	1.60154e+07	150213	5.52612e+06	4.38548e+06	234610	219922	144123	1.31767e+06	1.16326e+06	1.16044e+06	1.27054e+06	1.0064e+06	335573	177527	126789	468879	256969	218147
610.23685@11.84-rp	828763	339937	338173	327421	341878	319836	198481	78459.7	589928	74723.3	70461.8	722750	345846	1.27049e+06	4.07741e+06	2.18458e+06	631752	852431	1.07677e+07	3.80022e+06	1.12331e+07	8.3899e+06	5.62398e+06	33019.3	30021.3	335965	2.37347e+06	2.27945e+06	2407364	2.82344e+06	2.24016e+06	448443	87640.3	98384.1	70176.6	101534	230038
610.23703@11.564-rp	177966	155190	128494	144823	100577	147014	434245	133819	151932	122042	137778	593233	136657	106935	125231	102920	124554	102997	1.58237e+06	2.59842e+06	1.29968e+06	2.48012e+06	431758	37117.9	30891.3	36733.7	211772	250602	259488	328088	280429	198611	116718	66724.9	108555	147883	133179
612.23642@11.777-rp	519300	458906	434526	391378	399916	553419	212635	122234	256827	122416	119987	365564	128968	364703	1.2079e+06	638673	176283	261756	3.29848e+06	1.09729e+06	4.54846e+06	2.27895e+06	1.59247e+06	47078	44248.1	99623.2	769459	683804	671954	952020	631927	175431	134398	79473.5	113864	146965	114317
613.26714@11.816-rp	440271	450543	374845	299246	306003	334176	145636	87843.5	247454	87553.1	96221.8	101579	382625	665836	604878	852914	348552	367315	1.0326e+06	1.51701e+06	4.82119e+06	2.59348e+06	1.38389e+06	42996	29556.8	53940.4	1.17679e+06	1.64502e+06	459358	1.24215e+06	532049	272871	83065.6	85479.3	74439.9	111336	140517
613.27017@11.883-rp	581560	252637	200176	258118	190317	197029	113075	124404	331851	85558.2	71983.8	397669	260147	803989	1.06208e+06	700944	426019	557168	2.36643e+06	1.90203e+06	1.42872e+06	4.23822e+06	2.83702e+06	35347.3	25904.9	120194	1.3422e+06	1.64502e+06	1.09356e+06	1.24215e+06	1.29108e+06	247541	82845.6	183647	66084.2	141819	77051.4
614.31803@7.353-rp	33895.4	27287.3	26682.4	26321.3	26020.5	28180.6	26224.9	30901.8	61618.8	27258.3	28151.9	57333.3	73439.6	49430.6	33988.6	49386.2	29290.9	53553.3	90074.2	299439	240479	192457	55704.4	19383.9	18561.2	15856.8	422200	488853	438584	494701	425056	56830.7	37568.7	25079.9	35130.2	39140.1	29389.9
622.33297@4.87-rp	104662	117739	90614	78945.2	67467.9	125918	62517.9	56243.4	64161.8	63974.2	46845.8	52315.4	124951	195760	379764	196528	230450	465406	3.02336e+06	3.66085e+06	1.15059e+06	1.42578e+06	1.94218e+06	41586.3	55333	44519.8	380688	535044	523498	398085	467243	84241.9	59927.4	46892.5	62187.3	69759.7	157016
630.34101@16.22-rp	41529	42041.6	48650.9	40960.6	40276.9	55680.5	260793	250910	264692	306710	342724	696908	50656.7	55129.5	73920.5	51059	70990.3	107899	3.97178e+06	598026	5.38978e+06	2.80712e+06	3.42001e+06	40879.4	29097.9	25399.9	400323	365781	356769	785767	496322	366804	305813	251480	395962	320490	362485
630.34118@15.444-rp	33687.4	36306.5	37120	42008.8	38601.4	36874.8	78783.5	52450.4	153165	52468.6	114384	174577	40718.5	52249.4	45837.7	49080.7	40933.3	65165.9	1.44462e+06	820138	4.23145e+06	644996	1.44386e+06	31772.2	23144.2	21684	302413	282152	338546	332792	304051	91221.9	75581.8	44706.7	73686.2	259726	197363
632.35713@14.704-rp	33051	45592.4	31522.7	30564.6	30075.2	31311.4	60125.6	53432.1	35345.6	64175.3	110598	44405.6	38483.8	32124.7	28017.4	30303.3	25562.8	36420.1	511339	404675	2.00452e+06	327651	643789	24237.5	15855.6	26544	165433	128063	88769.9	82875.1	127595	53746	54240.1	32989.8	75661.9	223166	63535.2
632.35725@15.237-rp	51240.3	71787.3	54639.9	51199.2	49119.1	52773.5	141090	107395	81090.4	99371.1	134692	183921	65460.2	62995.4	60137.8	52256.5	67087.3	91566.1	1.20423e+06	313175	5.12513e+06	853252	1.93892e+06	46772.6	31064.8	28032.9	243195	259574	399042	381817	269474	117890	138616	63622.6	155543	270192	277051
633.36296@13.517-rp	64842.1	44601	49640.8	49686.6	39885.3	42722.7	106650	101736	76791.6	93699.9	130468	195435	115114	90469.3	105013	73640.7	84478.9	132196	790381	884314	216225	334814	585001	22729.5	15633.7	14982.1	92974.9	87840.1	91126.1	99008.2	85614.8	145613	166722	66510.5	95731.8	119607	157820
644.36502@7.237-rp	20995.5	18447.9	17698.9	16526.1	16227.6	18518.5	15482.5	18142.8	16049.4	18323	18699.5	17700.6	19382.7	19963.9	21969	19640.1	19241.5	17989.2	151057	249072	960135	111080	98699.6	13519.7	11410.4	10129	18088.4	16550.5	17827.3	18108.9	17786.7	16577.9	18581	15117.8	16475.7	17176.3	16508.8
647.3662@15.446-rp	26375.2	25364.1	24349.8	23868.4	22557.9	27588.5	31833	31261.8	34654.7	36288.1	39994.7	42437	28072.7	32742.1	41022.6	25683.7	38654.8	41872.8	409230	144697	1.26529e+06	234248	378980	21331.2	19386.7	17736.5	65629.7	86286.3	68575.1	51389	66695.4	68925.3	63876.5	26693.2	52396.6	92264.4	32566.4
648.35219@12.618-rp	195929	147482	197711	191130	141910	129765	72111.5	90300.7	86379.9	67441.2	94707.6	56679.4	132688	200355	374783	283687	121093	267670	669721	516150	3.84559e+06	762384	1.35487e+06	38311.7	26325.4	24275.6	182676	146449	179286	145078	195415	76209.9	104212	71808.1	130119	413096	86164.4
649.38249@14.699-rp	36654	36383.4	38101.4	36612.3	35991.3	39128.3	33616.6	35383.3	20142.1	40072.5	68836.6	20873.9	35663.7	25604.2	23954	30672.1	29421.5	39702.2	153793	91020.1	698987	98887.7	322475	18837.8	19148.7	15657.8	27963.5	27990.3	27319.9	28507.9	31137.1	33359.3	35571.6	22487.7	58704	84816	27499.8
657.41826@6.921-rp	183855	158874	49299.6	51089.7	83651.4	117170	31808	38370.4	29492.5	33458.8	39348.2	38877.6	230923	364647	358334	191600	410249	604459	3.43878e+06	6.62498e+06	3.50068e+06	1.52643e+06	2.25528e+06	27705.1	23720.9	19714.2	680435	82168	622103	731513	637706	35331.8	35380.7	28600.3	32458.8	41186.6	34507.4
663.37369@13.092-rp	267331	54493.3	75292.1	91142.8	51121.3	61477.9	86733.1	98898.7	89368.9	84725.7	90004.5	207117	62809	58294.3	61588.9	58643.2	56119.1	64739.2	681939	969341	364651	355472	668340	47182.3	39828.3	24241.7	83082.5	99306.2	93664	128150	138879	78008.6	76707.7	56867.9	59993.4	66087	71091.4
673.28165@11.858-rp	599669	318241	223279	221097	413834	207205	141584	95332.8	567135	75487	74210.8	530264	291078	924135	3.28989e+06	1.91126e+06	313440	570721	8.2214e+06	3.46444e+06	5.55379e+06	7.62477e+06	4.4252e+06	39629.8	27242.8	419824	2.19612e+06	2.18638e+06	1.62612e+06	2.16123e+06	2.18696e+06	497960	155269	195672	64114	149143	322771
673.3763@6.846-rp	256352	175776	81848.8	83674.6	100747	66069.2	32296.5	35180.3	29824.4	33774.6	35216.6	36934.8	41154.7	138977	305169	256242	48311.8	46459.4	944835	322831	1.29908e+06	490180	292809	25636.8	23481	19923.1	247728	229565	202170	198922	207211	32634.6	36691.5	27319.4	32802.7	41623	32455.7
679.29835@11.883-rp	288022	284889	237989	237078	202358	222182	108448	102224	301305	102510	81173.4	246285	293358	293849	539638	548062	259337	311948	1.2343e+06	1.29813e+06	1.71672e+06	1.6425e+06	1.20127e+06	39859.8	29212	217109	638198	777627	608712	605279	648925	128697	93421.8	56878.8	84502.3	159923	94106.5
686.43283@6.719-rp	49528.8	141193	35830	34994.9	34274.5	40765	29928.2	39686.6	29035.7	31470.2	35799.1	30755.4	44546.7	39050.7	45402.4	37269.1	162665	63721.9	1.89029e+06	1.05521e+06	1.32106e+06	476710	1.6883e+06	24161.6	21618.4	18229.3	231103	235503	202118	304812	245866	30985.2	39017.3	25659.6	31704	31914.3	34727.2
691.36983@12.941-rp	37550.9	36517.6	40369.4	35447.2	29900.6	31073.3	59611	59810.4	61449.9	67657.6	53328	329341	50007.5	63955.7	57744.9	45326.1	52373	59267.5	857651	1.02509e+06	658508	464247	926016	21762.7	15896.6	14579.6	112100	91076	105799	78231.8	88556.9	55547.9	62436	37668.8	60813.8	57109	56041.9
706.34016@1.764-rp	327595	120941	211057	196506	162117	196575	132630	256659	66018.1	241567	272113	203462	162827	202567	287694	262822	149629	144587	1.22294e+06	2.0209e+06	1.18744e+06	542793	849320	20804.7	20523.9	18812.6	272437	278031	281821	270792	304179	108864	230861	37430	170348	188762	151786
729.39127@6.352-rp	29099.5	23150.8	23900.7	21449.3	21868.1	22619.4	47484.3	35469	23341.8	32157.7	23809.7	45188.5	27475.6	25504.3	28087.5	25380.8	26566	23576.8	297889	541961	542315	176141	294693	15910	15835.7	13065.4	85374.5	62839.8	67446.8	56405.9	72283.7	66553.4	73933.7	43447.9	43407.8	97204.4	109046
732.36539@3.606-rp	137969	100293	49435.2	126693	95378.3	304034	56253.8	37756.2	35350.3	53152.7	36693.9	34111.8	140601	109694	268992	200589	45656.9	82518.4	270614	790021	2.39633e+06	559187	210025	31810	27961.8	32094.4	197010	182508	209678	170778	161626	35214.2	43990	30270.4	37206.1	47782.8	32218.3
741.34922@5.831-rp	112017	83351.2	73217.9	29979.8	57911.9	68505.3	25008.3	27611.3	27268.5	29624.3	26353.3	25957	31743	67118	133885	64153.5	77265.8	113195	428876	1.06311e+06	512984	257943	384382	20735.6	21600.5	18210.3	143760	89571.3	127373	158082	159506	28512.5	30775.8	24046.7	28537	28957.1	24862.1
772.45945@8.385-rp	120913	77889	149566	102397	173554	178105	42629.1	70094	37688.2	62267.2	58027	47305	71858.8	121439	427105	52603.5	91499.5	55196.2	256811	758692	1.39715e+06	419058	397170	25402.1	23311.5	20593.3	163937	117258	191306	179333	145274	44054.3	51933.3	31320.2	49715.8	82729	46779.7
815.39219@1.98-rp	52728.6	39121.4	40940.5	44156.4	32221.9	40628.9	36814.9	57257	38405.7	40556	53432.3	47966.6	55637.8	49996.6	49300.9	52570.4	47389.2	40712.8	1.11295e+06	1.03358e+06	567647	434853	64122	18583.2	16566.1	14375.8	67824.7	103355	55026.8	49226.6	71072.5	42293.6	49573.1	38355.6	45607.8	47058.7	42279.8
821.39585@9.647-rp	298938	200296	177285	173982	206477	258137	110974	158676	129670	128455	159775	222661	158773	185908	151981	119012	247752	430144	1.13447e+06	2.60458e+06	1.01183e+06	555683	692608	64699.1	61087.3	40783.1	260290	196023	300269	329454	338479	114920	130733	89061.9	160038	178561	161623
832.4553@7.612-rp	150675	76998.1	63513.6	58379.3	30161.8	70801.1	55613.7	98192.9	45697.5	79462.5	71969.1	52123.4	204292	71030.3	116461	124197	93433.5	51781.8	963072	370586	296308	505179	120496	17814.8	16785.8	14513.7	87577.4	79343.7	77063.4	105797	88294	55600	56564.9	29713.8	47076.4	72431.5	53555.5
835.40915@6.178-rp	30956.9	25521.9	26082.9	55471.1	24417.1	45929	19822.2	22817	21802.8	20861.2	20435.5	22973.1	26461	45219.4	75849	57904.2	55131.7	74073.5	108216	590651	672207	142011	72091.5	16826.3	15977.2	13074.8	44919.7	66096.8	62290.9	61866.7	90249	23016.5	21951.8	17605.3	20812.8	22593.4	19541.2
843.46979@8.505-rp	357073	497970	193142	499907	127587	480134	84029.6	150277	64213.2	108506	125326	139651	198660	505807	458507	254105	366563	328991	1.33258e+06	1.53941e+06	1.43623e+06	780334	707651	18884.3	17299.5	14969.6	335228	335333	309536	286042	288096	94803.3	111236	62720	110210	164025	113851
867.3184@12.052-rp	62344.1	56531.4	66466.3	48860.5	51472.4	54602	40885.9	47940.4	39311.1	36358.7	36882.1	34201.2	62893.5	76968.6	71439.4	51251.2	61079.5	66751.9	1.00177e+06	905674	102029	822223	1.4645e+06	19873.7	14376.2	13375.4	132014	94104.1	131054	72120.4	68838.9	32121.5	31025.5	25989.7	33873	36063	32733.2
897.46006@7.066-rp	53543.6	34660	34251.4	33310.5	32468.9	45417.9	23228.1	29153.5	20765.8	25346.6	29405.6	24537.5	27259.7	25723.4	26196.3	56678.8	25024.6	25126.9	472105	744535	465891	225464	424749	17234.3	15845.3	13656.9	39569.8	43217.5	118707	50151.1	54347.8	81642.8	66498.7	20800.2	21391.5	24617	22929.7
913.5593@7.433-rp	159708	33613.5	33145.1	31406.1	35894	32705.6	26561.9	43399	25264.8	30892.4	38952	31002.4	35740.7	33501.4	45179.2	32595.4	33323.1	30850.3	1.00428e+06	234277	57530.5	193058	257882	20913.7	19386.6	15984.3	31403.7	31406.7	56256.5	62757.8	54885.6	30490.7	37054	25891.3	32324.8	44404	32358.8
927.51419@7.294-rp	27081.2	23682.2	24676	57921.7	63471.1	46001.1	22736.2	24898	22817.3	26296.4	24883.5	24135.3	64918.4	27560.9	122427	32580.9	27482.6	24728.5	74315.8	516838	1.1722e+06	129835	197148	17993.6	16359.5	14165.5	36390.7	37464.3	54724.9	56922.4	63001.7	23996.5	25240.7	23021.7	24044.2	27034.6	23416.2
936.60042@8.43-rp	145976	115576	46672.9	71432.5	35858.4	50410.3	35967	64958.5	28691.9	47403.8	44789	38331.2	54705.7	65353.3	113332	82676.3	108910	66924.8	719994	1.35647e+06	1.09143e+06	332290	289817	18969.9	18377.3	15677.6	162333	154940	196989	297134	88988.5	53162.1	45824.5	34245.8	46723.6	73102.6	53219.2
939.57163@11.767-rp	104315	96173.4	63042.8	90689.9	78800.6	86036.7	65785.7	44377.7	40959.9	44443.9	42249.3	82585.7	38668.6	37532.3	117310	36163.6	34674.2	35508	1.02619e+06	420340	1.96325e+06	929040	477783	16885.7	15046	13360.5	90089.6	56994	54702.4	52210.6	44898.4	39120.7	45365.8	24236.7	38011.4	51924.8	65542.2
954.52508@6.979-rp	78438.9	66781.7	32519.9	28958.9	41969.4	36040.8	28844.1	32256.4	28168.7	28617	34056.8	28318.2	33022.3	34213.7	55761.7	29105.9	29416.6	35147.5	302465	1.72815e+06	1.53631e+06	210199	252648	19162.1	20534.9	16327.1	165308	133206	119100	170396	170325	26599.5	47367.8	23917.4	26960	31046.1	28862.9
955.50933@7.156-rp	116787	153121	45034	60901.7	42981.1	57774.5	29256	32244.3	28562.1	31428	33128.4	33444.6	97587.3	198348	173931	152836	166905	208148	415687	1.51233e+06	1.38501e+06	407541	233718	21480.2	21042.1	18253.6	194126	222199	208845	234826	176704	41500	30877	25654	28432.2	217876	44820.2
957.56145@6.323-rp	41377.3	29967.3	35210.1	32934.3	34432.8	32163	37956.6	34298.7	33190.3	31595.3	37296.5	34120.5	45955.1	36265.2	172975	223225	43914.8	51695.7	2.05044e+06	691473	137575	659449	394356	22237.6	22706.4	19718.2	42169.7	33093.2	31484	35397.6	32559.2	31404.6	33049.7	27173.3	31148.6	31810.1	30073.9
961.45321@11.509-rp	578337	432019	213405	262814	175669	252820	58243.6	50636.6	33580.8	40946.8	42782.5	42160.7	306028	459973	593830	257912	344136	489421	2.19637e+06	4.94004e+06	3.17242e+06	1.34311e+06	1.39135e+06	25354.1	19388.8	17931.4	314599	328834	483992	200010	542904	44161	45190.7	41499.4	38451.5	43409.1	39686.6
962.58072@14.434-rp	137010	79886.6	92919.9	100644	85803.7	78963.2	119563	128871	107787	117228	117280	224973	279355	208421	225097	118498	201335	262462	1.04681e+06	2.2687e+06	536565	311005	492711	71574.6	66438.1	36965.8	169885	164457	172865	156220	180273	123954	124361	84176.4	99601.9	131296	241965
974.51938@10.891-rp	62496.9	51069.2	49659.1	55152.3	43568.3	55196.1	20170.2	26889.4	16012.6	21485.5	24736.9	16715.8	54229.4	76296.6	81837.2	60614.2	67539.6	75726.7	789028	308249	269222	42325.6	885343	17837	13573.4	12176.5	47408.7	39714.7	45463.2	43561	45611.9	27268.7	28427.9	17917.2	26839.1	23677.2	21162.3
987.54129@13.093-rp	54157.9	53237.7	56206.3	58211.6	49943.4	60061.3	84734.6	96619.9	65894.1	82773.5	87930.6	64435.2	61361.7	56951.1	60169.7	57291.9	82646.6	65031.1	73120.5	793957	470941	255604	591189	46095.1	38910.6	23683.1	61939.8	63205	60314.9	96589.1	59751.6	67266.5	74940.2	55557.6	58611.1	64564.2	69453.3
987.54158@13.376-rp	82547.1	92503.2	113117	110869	63755.5	70476.3	880254	695773	649271	651237	602130	589476	486414	415236	993478	293094	331476	177159	3.83431e+06	7.96107e+06	5.52605e+06	5.26479e+06	3.05449e+06	63863.6	49454	21584.6	1.55387e+06	1.53125e+06	1.72633e+06	2.19981e+06	1.33823e+06	574827	677765	438572	649443	513281	618424
1030.58025@11.758-rp	740884	365193	345791	311455	423250	440405	823429	97272.2	314006	97417.5	324252	1.79074e+06	148874	1.83529e+06	2.07811e+07	5.76012e+06	765432	1.24241e+06	6.48333e+07	1.35951e+07	1.51041e+08	4.87161e+07	2.0478e+07	37012	35212.2	256396	6.10134e+06	6.68193e+06	5.94027e+06	5.54878e+06	5.7238e+06	348246	201638	63244.3	90611.5	116953	294691
1031.58992@11.882-rp	245625	118979	106825	112195	89130.3	105146	50359.9	48376.5	39043.2	38305.7	37467.3	41964.3	102386	357980	1.01116e+07	1.47051e+06	165646	164846	4.29892e+07	6.25353e+06	88012129	2.51498e+07	9.90223e+06	18008.4	13824.3	12852.9	1.98004e+06	2.43461e+06	2.10648e+06	2.26648e+06	1.49879e+06	40765.9	37324.5	24371.6	32534.5	75682.2	37480.7
1039.57763@6.455-rp	42178.4	36151.7	43006.8	34647.6	61565.8	36116.3	37469.8	53410.7	34058.2	45372.9	43993.7	38273.3	286206	256417	569308	388722	192413	237354	2.06099e+06	1.14837e+06	817501	870784	1.94623e+06	27828.9	22760	20569.8	300118	330062	33118.4	268061	36374.8	41645.2	45156.7	32234.6	43829.7	54950.9	38431.6
1040.59721@7.796-rp	383882	111271	79173.1	29455.5	99897.3	133646	43904	68557.6	31774	59467.7	60792.2	40091	73575.2	83160.2	255950	120551	119421	61888.8	640294	610010	2.88469e+06	831028	249276	18082.5	15992.3	14690.4	190169	153263	190512	196540	167377	32062.1	55256.6	21754.1	32557.9	57476.6	41968.6
1052.56765@11.81-rp	298743	343653	311840	248948	254569	224244	121157	73078.6	65225.9	72837	80048.5	84505.7	318313	264833	2.63202e+06	688131	281680	305576	1.26786e+07	2.2861e+06	2.03996e+07	9.41813e+06	3.39417e+06	35769.1	24525.9	23283.1	1.01047e+06	990684	691446	1.22563e+06	795070	70176.6	69103.7	44522.7	61927.8	92622.2	65245.1
1068.52792@11.799-rp	181177	167036	109494	104757	97794.8	116923	56258.5	77076	62971.1	74980.5	73379.4	65249.6	67160.4	110443	1.63412e+06	416206	60222.8	63688.9	4.7805e+06	1.20417e+06	1.07601e+07	3.62801e+06	1.43645e+06	29685.7	26498.8	23684.2	421793	460773	505791	571213	471848	64784	78792.1	43883.2	64485.5	90184	72084
1068.52878@11.55-rp	90389.7	84796.9	78681.4	71128.8	66130.4	78693.6	55091.4	79687.2	45599.4	81315.2	73665.2	104135	91053	71249.8	83439.6	68574.3	82989.1	68625.6	489510	973489	588417	918695	62119.8	24731.2	20582.5	19116.7	69610.9	71425.5	66736.9	83526.5	65851.5	62185.7	77767.7	44458	69255.8	90612.9	73217.6
1078.54174@6.293-rp	39939.6	32339.3	37181.6	33875.6	35416.9	33296	33418.7	35279	34138.9	32498.3	38362.4	35095.7	48711.4	57836.6	332759	202386	45169.9	152563	830998	1.46851e+06	2.75192e+06	702138	612264	23542.9	23539	20281.7	34015.4	34039	32383.8	34710.7	33489.7	32302.2	37969.4	27949.9	32038.9	33388.3	36762.3
1106.54812@11.565-rp	2.30819e+06	5.08925e+06	3.10534e+06	2.25462e+06	3.37309e+06	2.17139e+06	161540	85794.7	49094.3	87547.4	79311.1	58093.7	1.43964e+06	3.72796e+06	1.66144e+06	2.0719e+06	1.99132e+06	3.94227e+06	1.01303e+07	6.78309e+06	1.25212e+07	5.48383e+06	2.41677e+06	26626.7	22160	20581.9	1.07011e+06	1.98694e+06	2.38482e+06	1.22199e+06	1.6194e+06	65703.6	78801	47865.4	74563.8	97557.8	74229
1110.5373@11.559-rp	267333	186084	203107	173653	153419	176281	191151	160458	87080.1	146337	143196	105076	573178	727723	150160	575804	459602	742519	8.26671e+06	7.80444e+06	6.52321e+06	5.90137e+06	1.59074e+06	44507	37040.9	34403	1.82885e+06	1.60556e+06	1.55821e+06	1.55012e+06	1.72722e+06	136065	148661	81232.8	132572	227388	139353
1110.53894@11.822-rp	961776	509388	492216	430205	379568	419477	272793	184370	135557	181718	176270	167787	1.13392e+06	1.70518e+06	4.81832e+06	2.47532e+06	1.08286e+06	1.44414e+06	1.86336e+06	5.87167e+06	1.03375e+07	7.42626e+06	4.10964e+06	77117.6	63659.4	59100	1.16201e+06	1.77672e+06	1.34939e+06	2.92811e+06	1.05932e+06	155496	183987	107307	157387	217051	169945
1110.54465@11.534-rp	775807	716309	261473	408561	206088	296600	68329.3	59405.1	42474.4	47051.7	52901	58250.4	508632	691893	765297	320655	531644	714533	7.90047e+06	6.89503e+06	6.51623e+06	6.32342e+06	641773	29744.5	22746.2	21460.1	264215	275365	303841	274924	287071	51808.1	55337.3	48685.6	45109.9	51942.8	49677.1
1111.54057@11.675-rp	447582	405559	357465	352217	324434	448964	84717.9	118771	75504	100660	117752	92440.1	144730	198307	1.29651e+06	282081	120750	188430	3.47451e+06	3.61579e+06	2.12407e+06	3.7914e+06	1.87286e+06	37111.8	35896.5	33161.6	636513	550103	462306	665769	619965	99958.6	114430	68912.4	103178	150469	100807
1157.47347@6.63-rp	463581	184168	174403	133970	154117	254904	313550	461256	263970	326027	375008	269783	532483	472439	531191	351033	525782	454085	3.12882e+06	7.30234e+06	4.6945e+06	1.84282e+06	2.60222e+06	32901.9	31583.6	27489.4	902974	701742	743170	770051	716884	223363	253995	62795.7	127363	370677	270129
1184.69962@10.248-rp	114505	86762.8	126636	72158.5	65444.5	79352	282686	127152	68857.6	117794	146448	75081	122581	104904	123435	248144	113500	94133.5	1.25123e+06	1.24327e+06	645883	628193	524605	22947.2	20940	18440.5	102816	108438	104731	120214	97109.6	117511	121463	70390	260696	149944	118007
1265.4335@5.194-rp	48672.3	46088.3	44012.6	43105.8	40484.3	42737.7	34255	40412	30750.4	44427.4	54837.2	52855.7	34856	33359.1	34188.2	31971.3	33064.1	31247	1.19886e+06	2.24106e+06	248567	130311	1.35276e+06	30703.7	26896.7	25634.9	95947.9	106737	74222.7	128635	92051.9	30432.5	31326.9	29042.4	29553.7	34655.2	30475.3
1382.75011@7.363-rp	33469	26944.1	26346.8	25990.2	25693.2	27826.1	25895.1	30513.1	23998.7	26915.4	27797.8	26938	62181.2	54793.6	33561.1	30253.1	55085.3	26600.4	1.25639e+06	438921	408385	566488	175615	19140.1	18327.8	15657.3	78079.6	101102	94023.1	57393.3	72538.8	31709.7	37096.1	24809.3	34688.4	38647.8	29020.2
1405.71929@7.663-rp	170203	195949	44899	93213.5	113783	165816	74728.2	253800	56946.2	106774	96705.1	69386.4	94984.3	150540	220534	72374.8	137911	69579.4	765122	2.20403e+06	1.84576e+06	558228	564006	23405.7	21958	19598.8	226495	205404	295886	240255	285669	74709.9	76006.3	39926.5	63256.7	97326.3	71962.6
1426.6944@7.66-rp	328856	95295.2	182597	101646	158765	224129	65852.5	102601	50182.5	83620.6	85219.1	61145.2	83702.7	129231	174870	148278	129652	108619	1.30251e+06	3.87825e+06	4.25278e+06	672565	1.51156e+06	20625.8	19349.9	17271	410232	471763	454865	433944	361637	60816.5	66978.8	35184.3	55743.5	85766.6	63415.4
1461.47062@6.089-rp	47261	40214.4	35306.4	30017.1	28564.7	36993.8	31396.5	22969.3	23856.4	22164.4	22662.1	27177.6	78713.8	47255.5	43534.9	29352.1	42475.4	41894.5	3.24146e+06	1.13843e+06	706140	490721	2.38659e+06	19784.9	18224.9	16398.7	211981	275256	195093	195809	157922	24220.5	22675.1	19492.9	21705.6	44676.1	32433.2
1555.58055@2.117-rp	109233	90793.8	95628.2	79619.6	84209.9	88889.7	142885	164702	99328.2	143223	168484	117056	155826	141466	129721	111120	138615	117255	7.08557e+06	2.50078e+06	1.74024e+06	1.1167e+06	4.26066e+06	54473.6	49273.2	45778.1	424966	306145	303037	365457	345232	144394	148519	92195.6	106589	203918	160755
1583.81787@11.793-rp	189725	174917	114660	164944	143320	156481	58913	80712.7	59621.9	80833.2	76841.7	68328.3	70329.2	68262.5	516522	97249.3	63064.3	66693.9	2.68867e+06	357812	4.7457e+06	2.27507e+06	765071	31086.3	27749.1	24801.7	131282	103388	131891	89076.4	161511	67840.7	82509.8	45953.7	69134	94439.2	75485.2
1583.86696@8.461-rp	102298	264877	65317.1	65969.2	73777	137914	80257.4	91878.4	40582.3	97278.3	71740.3	61382.7	77376.8	423812	189836	63000.8	279162	116953	1.27712e+06	2.32531e+06	1.86496e+06	705180	529423	27597.9	25993.1	22174.6	204701	258036	288827	218329	243856	76762.9	83175.9	54957.3	108608	161426	75274.1
1617.84994@8.57-rp	379268	719146	87771.4	115570	111949	149882	91337.8	163347	69797.9	130821	136226	89126.5	203640	860885	397031	235108	896693	498430	1.40036e+06	3.69027e+06	3.66527e+06	1.27425e+06	1.13275e+06	20298	18870.3	16350.2	477339	611160	537750	496919	594941	109429	157549	215701	132344	178290	123753
100.00123@0.892-rp	1284302104	1138524202	1218699146	8.20183e+08	1287456793	1082569667	2.18394e+08	2.81975e+08	5.29337e+08	1127364177	9.0549e+08	2781524863	1008940647	1440132678	1840029124	1516048065	2201361771	8.71173e+08	1952688855	6.22325e+08	1795729127	1550451091	2286176906	8.26376e+06	9.34558e+06	8.23276e+06	1249592868	1312451226	1212378464	1252339172	1236916994	9.28358e+08	2.67967e+08	2.11323e+07	1.53554e+08	1213748543	9.40567e+08
(2E)-4-Oxo-2-butenoicacid@1.591-rp	3.35622e+08	2.3861e+08	2.60337e+08	2.03024e+08	2.43755e+08	2.32704e+08	1.7906e+07	1.21876e+07	1.64978e+07	1.16567e+07	1.51681e+07	2.2128e+07	1.54055e+07	7.55786e+07	6.48148e+07	1.69576e+08	1.05829e+08	5.83992e+07	1.48158e+07	8.43094e+06	5.6639e+06	1.03642e+07	8.19788e+07	2.64201e+07	2.84989e+07	1.84176e+07	1.10796e+08	1.11626e+08	1.13877e+08	1.13367e+08	1.11923e+08	5.33762e+06	6.26954e+06	1.04796e+07	5.12653e+06	6.02535e+06	5.60044e+06
100.01662@1.6-rp	3.04006e+06	1.82395e+06	1.78842e+06	1.37405e+06	1.86815e+06	1.64858e+06	4.09884e+06	6.52003e+06	2.60046e+06	5.00744e+06	7.13117e+06	5.06007e+06	4.48843e+06	3.41161e+06	3.01506e+06	3.67372e+06	6.56008e+06	3.5035e+06	2.83118e+06	1.59463e+06	1.73331e+06	1.95568e+06	4.88702e+06	209968	285762	265293	4.99423e+06	3.48426e+06	3.71938e+06	3.51779e+06	3.58598e+06	1.71064e+06	2.23237e+06	2.16392e+06	1.40597e+06	1.65333e+06	1.65681e+06
100.05167@1.088-rp	1.02001e+07	1.04223e+07	6.98698e+06	9.14348e+06	5.89869e+06	1.02549e+07	1.46132e+06	3.6441e+06	564521	2.54785e+06	2.29421e+06	1.73776e+06	2.54856e+06	1.66462e+06	1.80041e+06	1.43328e+06	2.00995e+06	1.5331e+06	5.05026e+06	1.96203e+06	1.54505e+06	1.51621e+06	1.48215e+06	71788.3	66596.3	52823.2	2.94513e+06	2.73181e+06	3.16742e+06	2.88023e+06	2.91012e+06	1.29898e+06	3.87285e+06	1.80322e+06	2.83958e+06	4.35078e+06	2.72869e+06
Tiglicacid@1.075-rp	5.23902e+08	1.1727e+08	5.5694e+07	8.33826e+07	5.04878e+07	102622194	3.2008e+08	4.27316e+08	1.73787e+08	1902549500	8.72795e+08	4.05717e+08	2951191820	1670683021	7.39946e+08	6.62591e+08	4.18363e+08	1116985925	2128920099	1491497698	7.741e+08	1015650853	2013263791	1.85443e+06	1.87669e+06	1.38468e+06	8.15254e+08	8.17264e+08	7.47223e+08	8.12445e+08	7.52757e+08	2.14519e+08	4.61088e+08	2.10105e+08	2.35379e+08	6.92321e+08	4.14501e+08
5-Valerolactone@1.638-rp	5.33367e+07	3.7189e+07	6.23876e+06	1.46031e+07	7.46531e+06	1.6986e+07	792724	1.53666e+06	2.93613e+06	880966	1.93974e+06	2.29692e+06	4.12764e+06	4.77882e+06	5.80073e+06	6.07009e+06	3.14733e+06	5.04807e+06	4.49514e+06	2.74737e+06	1.45338e+06	1.30703e+06	4.21119e+06	203355	209689	185510	6.88115e+06	6.43103e+06	5.72895e+06	6.33285e+06	6.6341e+06	1.88335e+06	2.35399e+06	1.99318e+06	2.67105e+06	1.24718e+06	3.28308e+06
1-Aminocyclopropane-1-carboxylate@1.064-rp	4.57889e+07	4.31487e+07	2.63407e+07	2.51345e+07	1.6047e+07	2.89456e+07	8.03944e+07	1.8187e+08	2.31652e+07	1.31987e+08	1.29926e+08	3.7488e+07	1.15537e+08	1.0568e+08	5.53497e+07	4.17912e+07	6.46723e+07	5.80376e+07	3.74063e+07	2.13003e+07	2.02876e+07	1.81963e+07	5.08284e+07	295287	301801	194024	5.05106e+07	5.18708e+07	4.50552e+07	4.68774e+07	5.30089e+07	1.68516e+07	5.33869e+07	3.90569e+07	6.68852e+07	3.61569e+07	2.91226e+07
2-MethylpropanalO-methyloxime@1.029-rp	691553	678276	588539	572365	791603	625381	483986	1.51888e+06	388168	740833	587126	339655	938943	1.18472e+06	1.04037e+06	697490	1.16931e+06	910759	837167	583353	425436	515352	593494	141538	120674	110941	625361	822437	1.02418e+06	989607	716938	1.44145e+06	1.49898e+06	548776	2.25689e+06	1.78425e+06	1.03183e+06
101.99862@0.886-rp	1.69882e+08	1.52432e+08	1.6451e+08	1.10094e+08	1.72169e+08	1.44027e+08	3.19644e+07	3.82363e+07	6.29182e+07	1.50689e+08	1.24213e+08	3.56433e+08	1.32268e+08	1.91775e+08	2.4345e+08	202613359	2.97619e+08	1.18811e+08	2.36069e+08	8.39853e+07	2.3435e+08	2.1031e+08	3.06461e+08	1.01297e+06	1.11222e+06	885081	1.68387e+08	1.7397e+08	1.6638e+08	1.61564e+08	1.66351e+08	111199962	3.48177e+07	2.65199e+06	1.80965e+07	165429993	1.28785e+08
D-?-Hydroxyglutaricacid@1.442-rp	3.03653e+08	1.57796e+08	1.68257e+08	1.60274e+08	1.14846e+08	2.0183e+08	3.45837e+07	5.53227e+07	1.71097e+07	5.68723e+07	5.98231e+07	2.12235e+07	6.09728e+07	5.0721e+07	3.32452e+07	4.00938e+07	4.57151e+07	2.68103e+07	2.50322e+07	2.17462e+07	1.58611e+07	1.53691e+07	7.28087e+07	680322	651081	466832	8.114e+07	7.76141e+07	7.74437e+07	7.99447e+07	7.08284e+07	1.91035e+07	4.01237e+07	5.15799e+07	3.92412e+07	2.96848e+07	2.51693e+07
(S)-Methylmalonatesemialdehyde@1.269-rp	1.82383e+08	8.30499e+07	1.03384e+08	9.5704e+07	8.65637e+07	1.13774e+08	9.69446e+07	1.79913e+08	6.87973e+07	129644248	1.7028e+08	9.48945e+07	1.26466e+08	1.02603e+08	9.64563e+07	9.33349e+07	1.20029e+08	1.06086e+08	1.08839e+08	1.11131e+08	9.14689e+07	5.47708e+07	1.00823e+08	2.08627e+06	1.64469e+06	1.11277e+06	1.22271e+08	1.15386e+08	9.52241e+07	9.51187e+07	1.12569e+08	8.65342e+07	1.04308e+08	7.12923e+07	9.61228e+07	1.31835e+08	1.033e+08
Phenylacetylene@1.944-rp	6.01442e+07	4.34254e+07	1.86452e+07	4.20732e+07	9.19879e+06	4.45013e+07	3.6019e+07	4.94769e+07	6.86459e+07	4.72915e+07	6.31933e+07	4.86066e+07	8.85161e+07	7.25329e+07	8.16428e+07	9.09078e+07	7.71527e+07	6.85895e+07	227086366	9.70154e+07	3.82123e+07	9.03084e+07	6.75722e+07	394928	390184	296526	6.47509e+07	58428799	6.08038e+07	6.50004e+07	5.46619e+07	3.74813e+07	4.55786e+07	3.89389e+07	6.10749e+07	2.86947e+07	3.79396e+07
3-Methylbutanoicacid@6.664-rp	244756	115128	106763	92476.9	88283.5	98756.8	6.19211e+06	1.97986e+06	1.80169e+06	4.69804e+06	3.88568e+06	3.37169e+06	1.07141e+06	1.42689e+06	2.73346e+06	1.27968e+06	2.1957e+06	824944	3.06077e+06	2.4025e+06	4.16533e+06	1.8431e+06	2.42148e+06	75226.8	77864.3	71513.6	2.44648e+06	2.35604e+06	2.22482e+06	2.1892e+06	2.13795e+06	2.60465e+06	6.05096e+06	8.32811e+06	2.14396e+06	1.40776e+06	1.42262e+06
3-Methylbutanoicacid@7.192-rp	95651.2	85500.9	110723	81648.6	74896.2	96620.3	6.83054e+06	5.32411e+06	1.27765e+06	1.51553e+07	9.52771e+06	3.34635e+06	361789	840197	514032	368186	465226	371394	376919	278986	659601	227789	209512	79315.7	68425	92087.7	2.66111e+06	2.49812e+06	2.55444e+06	2.46234e+06	2.52225e+06	3.81226e+06	9.4922e+06	7.17052e+06	4.86136e+06	2.07055e+06	1.48396e+06
Thiomorpholine@1.254-rp	1.84601e+06	580618	370331	688383	157629	706671	2.08202e+06	2.75065e+06	1.68514e+06	3.79639e+06	4.58954e+06	1.2108e+06	7.68075e+06	5.30008e+06	3.54597e+06	3.40091e+06	3.8673e+06	2.43292e+06	5.28798e+06	2.27388e+06	1.26978e+06	1.79812e+06	2.29972e+06	19591.3	18373.7	16375.3	2.59647e+06	2.43906e+06	2.53014e+06	2.30986e+06	2.62751e+06	1.57006e+06	2.56451e+06	1.77682e+06	2.73954e+06	1.38039e+06	1.52056e+06
(R)-3-Amino-2-methylpropanoate@1.048-rp	1.60635e+07	1.47529e+07	9.35222e+06	1.06291e+07	8.5072e+06	1.13452e+07	2.58674e+07	5.80358e+07	1.06418e+07	3.57073e+07	3.55999e+07	1.46442e+07	4.82454e+07	3.66434e+07	2.52312e+07	1.85775e+07	3.28535e+07	2.31611e+07	1.90547e+07	1.61829e+07	1.20252e+07	9.21299e+06	1.94913e+07	1.30129e+06	1.26102e+06	899811	1.99703e+07	2.05297e+07	1.98329e+07	2.00273e+07	1.86134e+07	7.52292e+06	2.46576e+07	1.56458e+07	3.15741e+07	1.36845e+07	1.25668e+07
Choline@1.036-rp	5.63412e+08	5.57122e+08	2.69909e+08	3.37974e+08	4.47112e+08	3.63059e+08	1.31232e+07	1.45789e+07	5.83997e+07	1.0672e+07	1.0373e+07	4.65339e+07	4.5671e+07	3.93706e+07	4.5568e+07	3.18013e+07	2.82767e+07	3.65886e+07	8.47735e+07	5.46948e+07	2.56363e+07	3.72567e+07	6.74336e+07	235452	252401	198336	1.43026e+08	1.39117e+08	1.45752e+08	1.41406e+08	1.34969e+08	4.47045e+07	3.95665e+07	5.45212e+07	4.20869e+07	4.08639e+07	5.16811e+07
103.98511@0.981-rp	2.0294e+08	1.62928e+08	1.87448e+08	1.86737e+08	2.1241e+08	1.84753e+08	1.05853e+08	4.74636e+07	2.25937e+08	2.35084e+07	3.52696e+07	6.31141e+07	3.20115e+07	4.04986e+07	9.90671e+07	1.7662e+08	4.03988e+07	1.17256e+08	126390081	1.55613e+08	1.72853e+08	1.82483e+08	7.94655e+07	2.24011e+06	2.28226e+06	1.64745e+06	1.27586e+08	1.11868e+08	1.17158e+08	1.13459e+08	1.15399e+08	1.40043e+08	8.46225e+07	1.65787e+08	5.43954e+07	6.47491e+07	5.18109e+07
2-Hydroxy-3-oxopropanoate@1.258-rp	1.39179e+07	1.17249e+07	1.20448e+07	9.05335e+06	8.88986e+06	1.08264e+07	245286	252236	814585	259684	345994	271985	565697	841785	2.43002e+06	1.03431e+06	446121	461809	1.60704e+06	466032	974889	691953	6.20658e+06	110112	132163	93392.9	3.68195e+06	3.32168e+06	3.75991e+06	3.90605e+06	3.24466e+06	519915	115842	179126	328842	1.05858e+06	1.05069e+06
2-Hydroxy-3-oxopropanoate@1.079-rp	9.74467e+06	1.16071e+07	8.188e+06	9.65162e+06	7.37638e+06	9.07823e+06	1.55917e+06	2.84639e+06	1.82861e+06	1.8122e+06	2.19627e+06	1.87416e+06	3.51914e+06	2.84645e+06	4.96856e+06	2.83579e+06	4.21793e+06	2.09616e+06	2.70694e+06	1.35324e+06	1.00671e+06	1.17752e+06	2.04701e+06	81867.6	168984	123164	4.6182e+06	4.35532e+06	5.6598e+06	3.22234e+06	4.69219e+06	1.13706e+06	2.82663e+06	3.84098e+06	2.37092e+06	1.39989e+06	2.14987e+06
8-Hydroxyquinoline@7.62-rp	6.39145e+07	2.18811e+07	2.39386e+07	2.08804e+07	1.53591e+07	2.19607e+07	2.82655e+08	550601864	227733933	4.24391e+08	3.81943e+08	2.46482e+08	3.06151e+08	3.25905e+08	2.91219e+08	2.15029e+08	2.45111e+08	242967250	311165782	2.7654e+08	2.33677e+08	1.99522e+08	2.96276e+08	55428.6	88870.5	80399.4	2.43344e+08	2.27822e+08	238083827	2.4601e+08	2.43525e+08	2.57606e+08	2.83034e+08	9.88738e+07	2.05239e+08	3.84033e+08	2.58418e+08
tetrahydrothiophene1-oxide@2.913-rp	248062	362608	194423	257211	146347	121713	219247	431919	141906	522053	319354	399879	804990	566323	870009	397247	899249	592635	420847	107487	317144	205892	448268	193657	25243.7	23161.9	291315	299107	317430	400352	319296	38860.4	37795.5	27425.3	32833.6	39523.1	34018.5
(R)-3-Hydroxybutanoate@1.647-rp	5.54675e+06	4.46731e+06	3.97652e+06	3.90743e+06	3.34868e+06	3.99666e+06	4.25815e+06	5.17026e+06	4.69437e+06	4.57977e+06	5.61645e+06	1.61393e+07	3.15128e+06	3.51865e+06	7.823e+06	5.51029e+06	3.029e+06	3.97528e+06	1.76919e+07	4.83322e+06	7.66879e+06	6.91725e+06	1.02929e+07	80788.2	80666.1	117070	3.32761e+06	3.98201e+06	4.29668e+06	4.2365e+06	4.30322e+06	2.46457e+06	1.11226e+06	2.40237e+06	2.05669e+06	5.50705e+06	2.37205e+06
(R)-3-Hydroxybutanoate@6.231-rp	157341	103042	134496	21709.1	108359	118556	282455	4.93518e+06	3.50939e+06	559962	286976	103120	319182	126642	306300	547296	336710	77218.9	2.92148e+06	2.98376e+06	416417	3.90451e+06	1.27074e+06	174593	104894	53878.1	676125	770085	684772	706558	605632	95390	121673	159242	77249.5	59831.5	37686.4
(R)-3-Hydroxybutanoate@3.455-rp	129341	161884	38427.6	30885.2	147145	147373	3.57056e+06	3.95553e+06	1.25707e+06	4.2194e+06	3.68524e+06	3.70059e+06	829470	1.38915e+06	1.16975e+06	649167	822640	370511	2.20748e+06	1.92225e+06	4.06345e+06	2.68888e+06	1.23188e+06	22879.8	113647	70411.8	2.03718e+06	2.16847e+06	2.00052e+06	1.87241e+06	2.08785e+06	2.67352e+06	5.52037e+06	7.61336e+06	3.60877e+06	1.1322e+06	1.26036e+06
(R)-3-Hydroxybutanoate@8.963-rp	99371.7	96143.3	93712.2	100683	76763.8	74010.8	65082.4	616098	1.12728e+06	103330	134739	106776	97785.6	83374.3	74307.5	211234	66534.5	114306	1.4349e+06	960201	163826	1.41169e+06	339716	35247.6	70231.1	52892.7	168720	199895	222378	156870	232004	115307	95760.8	37743.5	132293	91231.3	79810.9
D-Serine@1.274-rp	2.83612e+06	1.55517e+06	2.03629e+06	1.38268e+06	2.83533e+06	1.75477e+06	2.89792e+06	2.33663e+06	4.33506e+06	4.59432e+06	3.22759e+06	7.37919e+06	879373	957960	714756	726989	595380	926914	1.16643e+06	1.03473e+06	932215	1.1126e+06	1.02123e+06	40295	36971.2	20987.6	2.39192e+06	2.25233e+06	2.28003e+06	2.34616e+06	2.37153e+06	5.54905e+06	7.50734e+06	3.39681e+06	4.12841e+06	9.52094e+06	8.25376e+06
105.05493@4.714-rp	1.93002e+06	1.44635e+06	1.43356e+06	1.38588e+06	442426	1.29992e+06	51246.1	44680.2	53245.9	54891	40686	47337.1	44961.2	46508.4	46100.5	40295.8	44918.1	37458.5	44382.2	48251.8	45262	34186.9	39210.4	30894.2	41054.4	34391.5	220451	266023	309226	234914	228055	45197.3	48205.5	33120.4	44843.4	48153	36868.4
105.05716@4.711-rp	6.50619e+06	5.81681e+06	5.00337e+06	5.61448e+06	4.18321e+06	5.94075e+06	53397.6	46556.1	55481.4	57195.6	42394.1	49324.6	46848.8	48461	48036	41987.6	46803.9	39031.2	46245.6	50277.6	47162.3	35622.2	40856.6	32191.2	42778.1	35835.4	1.02927e+06	1.14765e+06	1.03869e+06	1.14735e+06	958780	47094.9	50229.4	34510.9	50833.7	50174.7	38416.3
4-Vinylpyridine@4.714-rp	5.29005e+06	4.45259e+06	4.06581e+06	4.33618e+06	3.31917e+06	4.33508e+06	58677	51159.1	60966.9	62850.5	46585.7	54201.3	51480.8	53252.4	52785.3	48081.3	51431.5	42890.2	50817.9	55248.6	51825.2	39144.2	44896.1	35374	47007.5	39378.5	810189	830772	757481	924855	799358	51751.1	55195.6	37923	55859.7	55135.4	42214.5
105.0678@1.04-rp	2.25461e+06	2.19889e+06	1.29755e+06	1.44428e+06	1.17435e+06	2.29185e+06	3.92553e+06	8.19816e+06	2.60626e+06	4.29773e+06	1.30322e+07	1.49684e+06	5.81441e+06	6.79371e+06	3.05105e+06	1.89168e+06	8.8647e+06	4.99073e+06	1.71493e+06	2.01804e+06	1.76682e+06	1.54012e+06	2.33909e+06	16135.5	13592.7	10544.6	2.63959e+06	2.48143e+06	2.9801e+06	4.48309e+06	2.8261e+06	1.51391e+06	5.6085e+06	822692	6.71902e+06	4.39556e+06	7.97419e+06
MFCD00084180@1.039-rp	1.23088e+07	1.76075e+07	1.01658e+07	1.12251e+07	9.33853e+06	1.49927e+07	751038	1.35837e+06	544547	1.34001e+06	1.31383e+06	1.14789e+06	2.44462e+06	1.5526e+06	2.07899e+06	1.17424e+06	2.64993e+06	1.40556e+06	1.31248e+06	656639	548230	1.79309e+06	934488	62175.8	55702.4	40632.1	3.17085e+06	2.46994e+06	2.71651e+06	2.78361e+06	3.40702e+06	438199	822377	806880	901880	615605	482623
MFCD00084180@1.025-rp	756441	333040	334029	287926	285839	354940	287339	680337	220308	420465	423709	319985	532630	594212	339118	289404	606319	532198	481504	246857	251753	254447	356646	22740.6	22443.4	14861.1	323675	325654	354786	498445	319946	348024	457392	277933	558968	985235	775756
S-Methylthioglycolate@3.043-rp	29655.2	24859	28369.8	24118.6	23996.6	25452.4	1.09725e+06	1.22147e+06	271619	178233	2.09008e+06	732221	32975.9	28873.8	27833.3	29097.6	33112.5	26943.3	29719.5	20935.1	21849.4	20419.8	26034.9	20029.7	18117.9	17096.2	241154	264770	249203	275554	229138	511387	425474	548112	460475	527008	564889
D-Glycericacid;a-b-Hydroxypropionicacid@1.121-rp	5.05741e+06	2.53083e+06	2.69922e+06	4.68426e+06	2.13274e+06	3.01805e+06	1.22832e+07	2.06152e+06	7.62601e+06	5.85102e+06	6.63007e+06	1.6863e+07	4.58121e+06	4.67008e+06	1.13247e+07	7.38603e+06	3.26111e+06	6.99259e+06	1.26627e+07	4.21468e+06	5.32235e+06	7.52793e+06	7.65435e+06	144712	67396.9	119579	6.34618e+06	5.87673e+06	6.06464e+06	6.3573e+06	5.48454e+06	5307564	5.3107e+06	9.4491e+06	2.28698e+06	1.87071e+06	4.17366e+06
Benzaldehyde@8.268-rp	910720	65304.3	71694.9	88164.7	75658.2	74505.3	216520	336583	243189	378883	281326	418174	6.16952e+06	7.03882e+06	7.36082e+06	5.25896e+06	4.53771e+06	5.94755e+06	443752	419720	312917	384761	287572	19459.1	98711.7	95160.9	1.85731e+06	1.70133e+06	1.57289e+06	1.58966e+06	1.58771e+06	92885.7	140152	95973.3	103176	142788	179053
Benzaldehyde@12.43-rp	59682.7	51554.3	53767.3	47374.9	34788.7	34681.6	149978	310866	206443	295472	178450	272578	69314.7	149328	160028	94068.7	84018.9	188484	505655	279022	235027	645399	611643	50064.4	49004	52577.4	146419	127288	140330	172085	158643	273351	288158	220226	330731	168040	175151
Benzaldehyde@10.11-rp	268276	232996	210523	169369	137416	236909	6.37422e+06	8.89432e+06	4.48779e+06	6.09585e+06	9.04365e+06	3.70206e+06	166968	253124	204309	144057	217572	170263	4.65281e+06	9.3214e+06	5.06235e+06	3.81079e+06	5.17873e+06	46163	49604	64126.2	3.62598e+06	3.63802e+06	3.54277e+06	3.63855e+06	3.48126e+06	5.50199e+06	7.74128e+06	3.1024e+06	6.96171e+06	7.52921e+06	6.76657e+06
Benzaldehyde@1.465-rp	168335	232372	510878	117984	276312	137152	6.70599e+06	3.9365e+06	7.17513e+06	1.58674e+07	1.55704e+07	2.86164e+07	236575	271820	241724	220118	178017	177990	1.73375e+07	8.04706e+06	1.57847e+07	1.04886e+07	2.01641e+07	182898	229638	33475.2	6.01104e+06	4.67094e+06	4.88335e+06	5.07913e+06	4.99758e+06	357887	195165	60338.2	211654	308610	355234
4-Fluorobutanoicacid@1.464-rp	1.43599e+07	1.87415e+07	1.18734e+07	1.59998e+07	1.41066e+07	1.25291e+07	239649	466338	245950	437214	585623	167722	232990	900084	222870	315355	463187	141763	276860	202711	131575	186594	317799	23749.5	29178.9	17399.7	3.49739e+06	2.42798e+06	3.33513e+06	3.81222e+06	3.21794e+06	322860	338583	492847	312069	377285	353822
106.05812@1.047-rp	5.77874e+06	5.60943e+06	3.61323e+06	4.47097e+06	2.90071e+06	4.93493e+06	4.17245e+06	9.68566e+06	2.03642e+06	7.94719e+06	8.58483e+06	4.01107e+06	9.9006e+06	8.09549e+06	5.84449e+06	3.04849e+06	7.75507e+06	5.26861e+06	4.00875e+06	3.21039e+06	2.48525e+06	2.24102e+06	3.57694e+06	63844	53782.8	41722.3	5.29272e+06	5.85258e+06	5.54453e+06	4.09944e+06	3.2715e+06	1.85673e+06	4.46186e+06	1.97057e+06	4.99139e+06	4.87003e+06	3.70777e+06
Ethylbenzene@14.351-rp	107892	87964.5	119000	88790.5	44011.1	45070.7	45873.9	36090.8	91454	52736.1	35546.3	902335	973159	855794	1.02951e+06	438198	1.01507e+06	1.06213e+06	1.71329e+06	1.03741e+06	1.92526e+06	824879	1.89495e+06	22920	20039.3	18359	625032	503690	548433	536563	565865	94617	132435	43982.6	52932.8	156674	222313
Ethylbenzene@13.386-rp	67485.8	57798.6	106250	37378.5	42678.6	79544.4	2.37672e+06	1.6121e+06	1.29841e+06	2.16342e+06	2.03762e+06	1.55977e+06	58252.7	66281.5	73272	39903	194411	91300.7	720197	2.20775e+06	787360	708247	456801	23063.5	20369.2	17975	1.66865e+06	1.33264e+06	1.21255e+06	1.03464e+06	1.08253e+06	2.49293e+06	2.31793e+06	1.25715e+06	2.63629e+06	1.58903e+06	1.61011e+06
107.56352@1.04-rp	6.59921e+06	7.87439e+06	5.5518e+06	6.26907e+06	4.84183e+06	6.69355e+06	6.72015e+06	1.17054e+07	2.5209e+06	1.0809e+07	1.35842e+07	5.88898e+06	1.18262e+07	1.0099e+07	6.44253e+06	3.66422e+06	6.07899e+06	1.00043e+07	5.34353e+06	4.63748e+06	4.60005e+06	2.9552e+06	8.76883e+06	54681.4	46064.1	35734.5	6.42398e+06	5.31683e+06	5.85193e+06	6.00322e+06	4.98e+06	1.91326e+06	4.27085e+06	1.54929e+06	3.69003e+06	5.96795e+06	4.20999e+06
1-2-Benzoquinone@1.103-rp	3.23246e+07	4.18794e+07	4.11039e+07	4.37756e+07	4.58336e+07	4.31275e+07	5.35177e+06	1.10947e+07	2.94754e+06	7.76286e+06	7.78996e+06	5.80722e+06	7.3203e+06	6.57086e+06	5.79648e+06	5.11375e+06	7.26428e+06	4.91778e+06	8.12794e+06	5.244e+06	4.89585e+06	3.68138e+06	5.4147e+06	572535	541592	929639	1.96281e+07	2.00755e+07	2.14466e+07	1.8383e+07	1.82258e+07	4.71424e+06	6.05166e+06	4.50918e+06	5.87305e+06	6.65614e+06	5.05639e+06
Anisole@8.206-rp	681623	774552	676097	560333	572476	555401	1.90648e+06	4.37076e+06	1.16756e+06	3.1266e+06	2.8524e+06	1.48841e+06	511695	1.03941e+06	307521	761204	390773	1.13447e+06	2.54407e+06	1.69324e+06	1.8122e+06	1.90277e+06	1.45384e+06	134464	133299	41023	921844	1.10526e+06	909736	1.01981e+06	1.26011e+06	1.00785e+06	724695	613142	599696	1.77468e+06	1.23467e+06
4-Methylphenol@6.025-rp	409029	100438	169683	125045	29371.3	95097.7	1.28115e+07	678302	7.75154e+06	974759	1.28835e+06	7.66045e+06	2.76601e+06	2.87523e+06	5.74501e+06	4.87085e+06	7.3637e+06	7.0851e+06	5.42805e+06	5.30482e+06	587619	1.00917e+06	6.34673e+06	23857.2	22348.8	20218.3	3.90409e+06	3.4549e+06	3.17171e+06	3.22154e+06	3.08434e+06	3.38214e+06	731483	547706	666598	6.99825e+06	9.31116e+06
4-Methylphenol@6.323-rp	357052	112723	226568	102566	55212.8	106917	7.4543e+06	1.20845e+07	3.73816e+06	6.06621e+06	9.58308e+06	1.89023e+06	1.74829e+06	352455	3.51007e+06	240902	3.30964e+06	269914	202489	194813	97880	143745	243484	119218	114385	132265	4.17004e+06	3.80457e+06	3.84479e+06	4.28672e+06	3.73459e+06	8.79892e+06	1.39891e+07	5.97614e+06	1.23792e+07	1.18076e+07	8.94935e+06
2-Aminophenol@1.296-rp	4.67925e+06	2.89284e+06	2.13959e+06	4.19135e+06	1.76874e+06	2.74085e+06	7.06606e+06	9.62552e+06	3.90664e+06	7.8871e+06	8.50656e+06	6.10218e+06	5.60941e+06	5.9149e+06	6.0132e+06	5.46609e+06	5.36731e+06	5.56636e+06	5.88732e+06	5.42997e+06	5.31023e+06	4.38591e+06	6.27426e+06	125566	128875	153240	6.43405e+06	6.06988e+06	6.26942e+06	6.24687e+06	6.32343e+06	6.38924e+06	1.17671e+07	4.42273e+06	1.1821e+07	1.32462e+07	9.54915e+06
2-Aminophenol@6.225-rp	67195.1	116527	57297.6	95164.5	86526.2	96113.3	559578	963676	382211	615842	781443	445163	469798	491417	532155	360264	539176	435097	112586	78758.1	46710.6	102758	276687	68631.7	78144.8	76100.1	256992	249381	229667	239020	223782	87255.9	104257	92883	105489	91822	93522.4
109.06341@1.047-rp	1.50571e+07	8.93508e+06	6.95321e+06	3.9678e+06	4.15813e+06	7.89106e+06	8.98605e+06	2.62014e+07	5.02365e+06	1.63993e+07	1.45082e+07	9.6918e+06	3.44495e+07	2.79465e+07	1.17486e+07	2.85343e+06	1.8925e+07	1.33111e+07	1.19037e+07	8.24699e+06	8.70964e+06	2.30573e+06	9.66129e+06	89210	174060	113233	9.95951e+06	8.31491e+06	9.64822e+06	8.19939e+06	6.61724e+06	3.51565e+06	8.32546e+06	4.16594e+06	1.09479e+07	1.27355e+07	8.90566e+06
3,4-Diaminopyridine@1.029-rp	1.70364e+06	2.11156e+06	1.45146e+06	1.7767e+06	1.21537e+06	905821	1.30269e+06	3.23103e+06	1.23266e+06	2.57511e+06	2.28384e+06	1.29073e+06	3.08723e+06	4.0698e+06	1.39536e+06	1.09869e+06	2.12602e+06	2.06523e+06	3.03923e+06	756505	721372	1.00286e+06	1.45594e+06	102723	78699.5	57823.8	2.45097e+06	2.10592e+06	1.50203e+06	2.00989e+06	1.39486e+06	466387	1.46376e+06	888761	2.16715e+06	1.22296e+06	2.31165e+06
Methylmesylate@1.141-rp	2.17018e+06	1.78771e+06	1.3457e+06	1.7877e+06	1.25125e+06	1.38426e+06	6.38484e+06	1.16153e+07	2.19547e+06	7.24016e+06	8.52822e+06	2.65946e+06	6.36951e+06	4.96521e+06	4.57217e+06	3.37723e+06	6.08278e+06	5.34712e+06	3.5398e+06	4.11336e+06	2.14225e+06	1.96883e+06	3.51425e+06	93571.8	87421.8	90170.3	4.72349e+06	4.21997e+06	4.30186e+06	4.28248e+06	4.07221e+06	5.23493e+06	7.65821e+06	3.44102e+06	1.2187e+07	1.04838e+07	8.491e+06
Catechol;1-2-Dihydroxybenzene@6.281-rp	732302	298393	305429	267183	280951	283871	340338	740511	185264	307700	459817	176026	4.46805e+06	730268	5.12173e+06	358277	5.76978e+06	360743	218327	153091	167096	151798	199574	325599	300283	224444	905796	767398	766170	850157	750855	423329	639713	315399	561472	584007	502099
Catechol;1-2-Dihydroxybenzene@1.16-rp	2.95917e+07	2.86304e+07	1.93513e+07	2.49578e+07	1.91554e+07	3.04627e+07	3.00039e+07	2.34404e+07	1.64347e+07	3.77122e+07	4.93616e+07	2.09461e+07	5.47002e+07	4.05574e+07	3.25406e+07	2.87543e+07	5.23699e+07	4.31167e+07	3.18002e+07	1.47946e+07	1.86767e+07	1.7118e+07	4.1172e+07	1.22621e+06	1.6034e+06	1.52896e+06	3.03176e+07	3.03649e+07	2.72134e+07	2.86776e+07	3.25037e+07	9.89031e+06	1.35591e+07	6.48476e+06	1.39712e+07	1.57738e+07	1.2787e+07
Catechol;1-2-Dihydroxybenzene@3.072-rp	521353	28111.5	27857.2	24278.6	26458.3	24992.6	376746	1.56042e+06	491327	1.77722e+06	895329	1.00765e+06	1.43379e+06	2.33893e+06	2.81884e+06	1.36608e+06	3.33904e+06	2.43731e+06	1.51589e+06	1.16396e+06	3.04875e+06	1.60963e+06	1.04921e+06	20237.4	26790.2	35288.5	1.48573e+06	1.25254e+06	1.31708e+06	1.52458e+06	1.18918e+06	1.62221e+06	2.75298e+06	1.4539e+06	1.44827e+06	1.55438e+06	1.1004e+06
Imidazole-4-acetaldehyde@1.053-rp	767627	652457	654394	551848	559984	695360	603662	1.49328e+06	435989	2.53388e+06	1.01172e+06	617860	1.21405e+06	897831	213306	407166	676656	807972	815497	585977	493209	498485	893038	44550.9	43968.6	29114.2	604012	600158	638033	552891	527849	668884	1.86764e+06	578156	1.43824e+06	1.32925e+06	1.15362e+06
Imidazole-4-acetaldehyde@1.072-rp	8.83912e+06	6.27195e+06	3.23364e+06	4.46699e+06	2.41397e+06	4.51391e+06	6.93688e+06	1.2491e+07	6.38275e+06	1.32191e+07	1.3565e+07	6.09195e+06	9.66014e+06	1.26963e+07	8.4834e+06	4.28784e+06	1.22178e+07	9.84578e+06	7.17756e+06	2.98333e+06	4.22209e+06	2.95305e+06	6.67569e+06	498916	441399	334598	7.5024e+06	6.88655e+06	6.97323e+06	7.00291e+06	9.44477e+06	5.53605e+06	1.32274e+07	5.16852e+06	6.42058e+06	1.51339e+07	1.8041e+07
4,4-Dimethyl-1-hexyne@17.775-rp	110162	119441	121414	157729	120787	139940	1.54845e+06	1.62651e+06	564030	1.86865e+06	1.10039e+06	684719	190857	468038	552971	303943	328841	558349	601286	676369	460263	273717	696814	124576	90892.3	73407	624469	669076	784763	670193	647411	1.22594e+06	1.99915e+06	1.54343e+06	789009	1.23236e+06	1.20114e+06
110.11044@15.054-rp	226253	158275	120914	149346	96515.6	111508	1.86307e+06	2.36277e+06	566671	1.10674e+06	1.60335e+06	417051	333516	331419	484335	356279	378953	702103	816364	1.73497e+06	703952	394583	752982	22427.7	21242.2	18560	917790	1.06598e+06	798785	888770	1.03057e+06	1.45609e+06	1.76746e+06	1.27743e+06	2.02162e+06	1.1582e+06	1.24654e+06
2-5-Dihydroxypyridine@1.807-rp	577260	495390	515656	518698	429397	621035	3.47503e+06	1.74659e+07	3.37113e+06	4.80635e+06	6.44944e+06	1.42224e+06	3.00286e+06	2.15621e+06	8.23563e+06	3.13166e+06	6.53856e+06	1.46926e+06	1.99441e+06	1.57467e+06	1.90587e+06	1.1211e+06	2.58167e+06	228288	258401	248309	3.09368e+06	3.87449e+06	4.16438e+06	3.41283e+06	2.98193e+06	2.23144e+06	5.0123e+06	3.0962e+06	4.0087e+06	2.24233e+06	1.60229e+06
111.04257@1.09-rp	9.10652e+06	8.22261e+06	5.601e+06	7.82945e+06	4.823e+06	8.5008e+06	934253	1.89185e+06	418543	1.51381e+06	1.33178e+06	1.34253e+06	1.30984e+06	721984	1.12328e+06	996081	1.20587e+06	1.03344e+06	4.2182e+06	1.36415e+06	995569	1.12813e+06	570971	31136.2	29454.4	22910.6	2.31322e+06	2.17094e+06	2.15686e+06	2.17408e+06	2.30098e+06	1.04318e+06	3.19044e+06	1.23203e+06	2.04764e+06	3.63351e+06	2.28573e+06
Cytosine@1.467-rp	4.20725e+07	3.93652e+07	4.05058e+07	3.46438e+07	3.49067e+07	3.84634e+07	2.40421e+06	5.95409e+06	961139	4.37527e+06	2.65295e+06	1.8691e+06	2.68387e+06	2.59435e+06	2.58629e+06	2.52895e+06	2.79309e+06	2.63716e+06	2.23543e+06	2.62509e+06	1.77977e+06	2.21082e+06	3.27725e+06	147622	146707	96122.5	9.64131e+06	8.49743e+06	8.93556e+06	9.92216e+06	9.82987e+06	6.16756e+06	8.03389e+06	3.34885e+06	4.36937e+06	3.68834e+06	2.50028e+06
Cytosine@1.219-rp	1.67923e+06	928877	523726	1.49073e+06	356593	906217	3.90826e+06	1.41277e+07	1.85894e+06	7.76083e+06	6.57433e+06	2.58005e+06	3.13215e+06	6.54632e+06	8.24672e+06	4.46465e+06	8.21507e+06	5.34855e+06	5.36779e+06	4.71071e+06	5.39878e+06	3.70726e+06	6.25222e+06	75805.1	87725	58326.5	4.7998e+06	5.01614e+06	5.59581e+06	4.67554e+06	5.60099e+06	5.84923e+06	1.60284e+07	1.29524e+07	9.41621e+06	4.55522e+06	3.11447e+06
Cytosine@1.081-rp	1.43704e+07	1.18101e+07	7.83535e+06	1.02587e+07	5.55752e+06	1.16373e+07	5.86155e+06	1.58301e+07	5.29365e+06	9.08065e+06	8.07764e+06	8.61516e+06	5.46382e+06	4.67669e+06	4.27656e+06	2.53712e+06	5.52707e+06	5.2152e+06	7.97537e+06	3.50498e+06	4.60731e+06	7.42366e+06	4.18456e+06	169718	187185	129725	6.59294e+06	6.20878e+06	6.30699e+06	6.37187e+06	7.20348e+06	4.88538e+06	9.60468e+06	5.85637e+06	1.10109e+07	8.87279e+06	7.34879e+06
111.04393@1.47-rp	4.10899e+07	3.92107e+07	4.00485e+07	3.408e+07	3.46019e+07	3.80058e+07	1.40578e+06	4.14651e+06	1.11135e+06	1.77569e+06	2.49097e+06	1.30933e+06	2.70901e+06	2.19078e+06	1.78539e+06	1.90868e+06	966053	1.78782e+06	982856	2.10666e+06	1.29149e+06	1.32611e+06	3.1872e+06	73902.6	98864.2	55690.4	8.85671e+06	8.14998e+06	8.93136e+06	8.98249e+06	8.98629e+06	1.46587e+06	2.73836e+06	2.381e+06	3.65299e+06	2.06454e+06	1.73209e+06
111.04399@1.16-rp	7.08872e+06	4.71559e+06	4.03817e+06	4.39415e+06	2.97336e+06	5.22183e+06	1.9372e+06	4.93284e+06	1.06161e+06	2.60235e+06	2.59715e+06	1.70846e+06	5.37025e+06	4.88182e+06	4.44731e+06	3.62021e+06	4.80044e+06	3.70084e+06	1.89054e+06	1.11314e+06	1.48529e+06	994809	3.02832e+06	60123.1	52227.5	44239.7	2.74963e+06	3.20229e+06	3.42289e+06	2.98003e+06	2.95565e+06	1.31235e+06	2.80761e+06	1.33698e+06	1.88e+06	2.445e+06	2.61451e+06
111.05027@1.203-rp	2.96781e+06	2.34143e+06	1.82663e+06	2.15994e+06	1.56346e+06	2.38935e+06	3.79828e+06	7.81645e+06	1.63657e+06	4.04748e+06	5.37438e+06	2.28419e+06	5.68153e+06	4.09166e+06	4.15835e+06	3.15982e+06	4.81239e+06	3.99257e+06	2.59938e+06	2.87818e+06	2.14994e+06	1.79858e+06	3.27609e+06	26199.3	23205.4	20312.5	2.73232e+06	2.42404e+06	2.62759e+06	2.44496e+06	2.71367e+06	263642	157467	191478	148363	900450	1.08372e+06
1-Vinyl-2-pyrrolidone@1.154-rp	513761	518515	287151	296294	346804	427557	577098	307496	167502	1.24762e+06	1.57336e+06	703394	880561	1.18511e+06	415433	421081	414102	363357	317443	303267	319118	207300	508304	34722.4	38593	46878.6	363473	453028	602660	512740	725649	290515	971265	316435	1.00583e+06	426870	525734
Histamine@0.86-rp	800399	538420	447987	285335	450217	582378	1.14983e+06	3.38984e+06	116925	237283	2.33615e+06	1.21663e+06	1.55959e+06	637003	369533	2.90841e+06	556565	718514	1.46884e+06	1.09006e+06	662056	1.42883e+06	2.32379e+06	128052	125071	75638.3	490823	842076	762807	1.49746e+06	639693	186509	82389	22135.6	105856	486282	677918
Histamine@0.944-rp	2.90791e+06	2.13644e+06	1.73781e+06	1.13574e+06	1.2082e+06	1.50942e+06	3.49336e+06	1.13382e+07	4.5184e+06	7.75804e+06	7108957	5.9474e+06	9.2614e+06	6.53966e+06	6.56016e+06	4.05107e+06	6.53729e+06	6.00321e+06	4.61286e+06	4.77995e+06	3.82881e+06	3.80247e+06	7.96771e+06	274837	300401	172069	4.05191e+06	4.99048e+06	4.48376e+06	5.03255e+06	3.7331e+06	604407	577436	512271	405271	1.94274e+06	2.49543e+06
Monomethylsulfate@1.115-rp	1.80997e+07	3.57472e+07	2.30009e+07	2.31944e+07	1.77403e+07	2.09414e+07	4.22598e+07	5.56301e+07	9.70647e+06	4.18649e+07	5.66932e+07	1.62247e+07	1.78607e+07	1.63604e+07	1.95252e+07	1.12567e+07	2.32443e+07	1.78761e+07	1.86156e+07	3.56841e+07	2.55363e+07	1.81505e+07	3.37018e+07	385972	290030	227537	3.20085e+07	2.78513e+07	2.79698e+07	3.01544e+07	2.81389e+07	6.25985e+07	4.87262e+06	1.71756e+06	4.00351e+06	2.57326e+06	1.37914e+08
Hydroxymethylphosphonate@1.118-rp	5.83574e+06	4.4923e+06	2.39269e+06	6.07719e+06	4.2501e+06	5.70006e+06	6.50503e+06	3.98986e+07	9.47655e+06	1.42346e+07	1.04556e+07	2.37201e+06	2.21254e+07	1.76685e+07	3.5288e+06	5.41394e+06	6314124	4.62037e+06	2.83266e+06	4.74166e+06	1.96472e+06	1.86974e+06	5.50515e+06	169787	136387	124950	1.25926e+07	1.10883e+07	1.23781e+07	1.20827e+07	1.07693e+07	5.24857e+06	2.35028e+07	7.05995e+07	9.13311e+07	5.00285e+06	2.00986e+06
2-Furoate@1.026-rp	448112	632228	1.13716e+06	1.61948e+06	1.8722e+06	851148	314148	480353	286242	480862	1.86712e+06	7.51637e+06	1.19427e+06	1.96609e+06	4.39543e+06	1.1898e+06	6.20057e+06	2.33099e+06	3.04641e+06	593462	1.02812e+06	816714	8.02907e+06	311916	272679	378824	1.12182e+06	1.34234e+06	1.47704e+06	834043	1.64154e+06	907359	421010	337506	524494	4.42244e+06	5.30346e+06
2-Furoate@1.492-rp	2.26621e+07	2.31561e+07	2.72389e+07	1.43522e+07	1.54696e+07	1.60983e+07	1.79057e+07	2.27239e+07	1.05599e+07	3.68168e+07	4.12909e+07	3.13333e+07	2.19842e+07	1.53858e+07	1.85845e+07	1.28774e+07	1.92946e+07	1.54546e+07	1.04061e+07	8.82041e+06	8.86152e+06	6.53053e+06	1.28484e+07	3.88907e+06	4.36696e+06	3.26152e+06	2.10279e+07	1.98104e+07	1.9617e+07	1.86847e+07	1.80957e+07	1.1307e+07	2.46867e+07	1.61277e+07	1.69699e+07	1.40769e+07	1.24565e+07
2-Furoate@1.272-rp	8.2773e+06	7.07934e+06	5.84979e+06	5.86585e+06	5.39288e+06	6.73153e+06	1.3346e+06	1.91606e+06	1.63449e+06	2.56849e+06	1.98793e+06	2.54754e+06	1.64087e+06	3.58891e+06	4.08598e+06	2.38433e+06	5.87458e+06	2.78747e+06	3.13684e+06	1.29267e+06	1.32837e+06	1.89297e+06	1.66963e+06	583354	403937	415481	2.20443e+06	2.81085e+06	2.464e+06	3.20727e+06	2.27298e+06	1.50821e+06	1.31675e+06	1.0726e+06	1.1771e+06	1.7838e+06	1.15563e+06
112.02667@1.102-rp	7.14961e+06	1.04957e+07	7.9229e+06	1.302e+07	7.60484e+06	1.03075e+07	1.99368e+07	2.99094e+07	7722814	1.80616e+07	2.16777e+07	9.65983e+06	1.91526e+07	1.74234e+07	1.27647e+07	1.45354e+07	1.93458e+07	1.28517e+07	7.13665e+06	7.85582e+06	4.13802e+06	7.41595e+06	1.11246e+07	166429	195441	126606	1.23231e+07	1.0436e+07	1.05215e+07	1.19613e+07	1.12451e+07	1.03029e+06	2.55366e+06	1.79225e+06	2.24539e+06	2.67369e+06	1.93566e+06
Uracil;2-4-Dihydroxypyrimidine@1.11-rp	334527	227489	152217	185271	134381	188884	538266	1.31047e+06	226802	771863	1.11139e+06	643937	502944	395373	533788	270787	455077	386524	495271	367396	245381	371041	447112	106539	117785	81837.7	368179	253235	301411	353212	426743	74146.6	222419	166474	265161	213468	217842
Uracil;2-4-Dihydroxypyrimidine@3.16-rp	1.78449e+06	1.34076e+06	1.18638e+06	1.05682e+06	1.32192e+06	1.52362e+06	350190	494577	65807.7	335635	471154	221402	373265	271517	224766	218563	52846.5	227895	310525	37860.7	215280	243257	268972	171078	189362	139423	270646	234149	286884	267299	198714	291217	451846	45291.9	441320	41873.6	222362
Uracil@1.758-rp	4.71425e+06	2.04804e+06	1.45424e+06	2.51643e+06	1.00584e+06	2.04028e+06	1.18104e+07	49697764	4.5902e+06	2.52977e+07	2.7077e+07	4.63992e+06	2.76389e+07	1.41608e+07	2.30562e+07	1.2071e+07	2.03394e+07	1.28431e+07	1.32364e+07	1.31679e+07	1.41498e+07	9.35015e+06	1.26943e+07	648891	782430	696369	1.6201e+07	1.76102e+07	1.74403e+07	18619243	1.74645e+07	2.26029e+07	6.07809e+07	3.9724e+07	5.62506e+07	1.34e+07	1.11721e+07
Uracil@1.59-rp	6.35314e+06	3.01153e+06	1.32942e+06	2.14796e+06	1.01909e+06	2.37875e+06	6.81273e+07	1.34608e+08	3.07062e+07	6.88186e+07	185240704	1.60478e+07	4.5389e+07	1.42542e+07	1.18661e+07	1.05575e+07	6.98112e+06	6.90795e+06	2.33655e+07	2.0242e+07	8.01609e+06	1.10637e+07	1.93039e+07	359286	399688	342231	3.43171e+07	3.13886e+07	3.31182e+07	3.47496e+07	3.27874e+07	5.41855e+07	1.15049e+08	5.81651e+07	1.46519e+08	3.95437e+07	5.01218e+07
112.04514@1.06-rp	8.98196e+07	1.25591e+08	8.54737e+07	1.07808e+08	8.18558e+07	129363836	8.40771e+06	2.08098e+07	4.70213e+06	1.33659e+07	1.31001e+07	8.8474e+06	3.00898e+07	3.64829e+07	1.52122e+07	1.57995e+07	1.71835e+07	2.32565e+07	8.31249e+06	6.26455e+06	6.68978e+06	3.14839e+06	1.20868e+07	81372.2	89415.9	75814.2	3.71906e+07	3.46592e+07	3.85395e+07	3.41507e+07	3.59093e+07	5.24544e+06	1.03174e+07	6.98015e+06	1.14028e+07	1.24284e+07	1.11561e+07
112.05176@1.681-rp	1.36118e+07	1.02891e+07	8.78615e+06	7.59069e+06	7.56792e+06	1.23165e+07	436248	999913	493886	736322	634985	715168	7.76787e+06	8.07204e+06	5.68328e+06	6.39321e+06	7.25171e+06	7.37958e+06	2.10871e+06	642729	1.14045e+06	1.60575e+06	2.82385e+06	56039.1	48743.4	39349.9	3.53732e+06	4.76369e+06	3.5592e+06	3.8232e+06	3.21906e+06	445598	783155	880644	649220	688529	536463
Arenediol@1.234-rp	3.35436e+07	1.90291e+07	1.91409e+07	1.57175e+07	1.43812e+07	1.94317e+07	6.6912e+07	1.54407e+08	2.79547e+07	1.14863e+08	1.43414e+08	3.13467e+07	9.20961e+07	7.324e+07	4.3738e+07	3.82634e+07	5.71675e+07	3.77452e+07	4.19509e+07	3.72741e+07	2.04409e+07	1.87101e+07	47557900	1.30444e+06	1.23756e+06	1.18125e+06	5.50184e+07	5.00657e+07	5.08979e+07	5.3273e+07	5.1191e+07	3.63887e+07	9.46098e+07	4.4379e+07	1.00746e+08	5.8224e+07	4.31595e+07
4,5-Dihydro-6-methyl-3(2H)-pyridazinone@1.07-rp	1.53788e+07	1.47171e+07	1.13352e+07	1.06834e+07	9.21593e+06	1.40892e+07	3.89488e+06	5.89774e+06	2.84672e+06	5.25584e+06	5.49524e+06	7.76799e+06	3.62039e+06	4.25096e+06	3.13036e+06	2.08363e+06	4.02314e+06	2.51208e+06	9.53555e+06	2.64186e+06	6.35727e+06	5.79267e+06	8.31397e+06	145300	141760	117872	6.62432e+06	6.82527e+06	6.5644e+06	7.04101e+06	6.24515e+06	1.76671e+06	4.11127e+06	1.86157e+06	2.78686e+06	2.21767e+06	3.56093e+06
Phosgeneoxime@0.92-rp	9.1495e+06	1.25026e+07	7.78152e+06	9.10278e+06	7.95024e+06	1.0047e+07	4.01593e+06	2.08539e+06	2.03034e+06	4.40113e+06	3.1783e+06	2.10156e+07	4.80043e+06	8.46986e+06	1.22554e+07	5.26106e+06	9.70574e+06	8.34001e+06	8.96107e+06	2.81607e+06	6.9532e+06	4.69715e+06	3.26644e+06	2.74059e+06	3.16375e+06	2.55454e+06	6.65687e+06	7.19909e+06	7.40613e+06	7.6658e+06	6.42672e+06	2.81711e+06	1.74734e+06	542801	1.21762e+06	4.5551e+06	3.66864e+06
XJ4375000@10.607-rp	9.6376e+06	6.96887e+06	8.76298e+06	4.14754e+06	6.51462e+06	5.19075e+06	66824.7	107851	52393.6	82952.5	90931	63098.3	109777	91213.4	99519	85866.4	105082	85096.1	82653.3	81207.1	67481.2	48387.3	88344.6	16775.1	15729.7	14191.5	1.26082e+06	1.0412e+06	984306	1.11293e+06	1.01717e+06	82016.9	84604.4	42284	93210.5	134797	87368.7
XJ4375000@9.127-rp	6.18999e+06	5.19529e+06	4.70742e+06	5.09526e+06	4.52074e+06	5.03828e+06	65608.9	83289.8	45894.5	77330.5	119224	55095	99007.9	94864	100974	89329.7	110338	87553	68533.9	62559.8	59091.7	61764.3	73856.7	24885.4	19847.3	16731.1	1.05647e+06	1.05737e+06	956713	886984	936942	65952.8	99789.5	56940.1	90658.6	123887	93999.5
XJ4375000@4.712-rp	5.96793e+06	5.42584e+06	4.49705e+06	4.97023e+06	3.8571e+06	5.2648e+06	54881.8	47850.1	57023.5	58785.3	43572.5	50695.5	48151	49808	49371.1	43154.6	48104.8	40116	47531	51675.1	48473.1	36612.3	41992.2	33086	43967.1	36831.5	814884	754460	837466	817359	902908	48403.8	51625.5	35470.1	52246.6	51569.2	39484.1
(S)-1-Pyrroline-5-carboxylate@1.471-rp	1.76638e+07	1.26019e+07	1.10687e+07	1.4296e+07	7.56608e+06	9.77308e+06	1.6741e+07	3.54917e+07	1.17783e+07	9.42036e+07	9.82306e+07	1.69342e+07	8.06159e+07	1.55654e+07	1.55456e+07	1.71415e+07	1.69728e+07	1.49873e+07	1.79995e+07	1.94344e+07	1.39602e+07	1.36072e+07	1.80587e+07	851727	990219	871017	2.16575e+07	2.17178e+07	1.80123e+07	1.83839e+07	2.05513e+07	1.65767e+07	2.59422e+07	1.29707e+07	2.62971e+07	3.10227e+07	2.18171e+07
(S)-1-Pyrroline-5-carboxylate@1.678-rp	1.06138e+07	1.25281e+07	8.64676e+06	7.90994e+06	7.05384e+06	1.13538e+07	8.24084e+06	2.34933e+07	6.06478e+06	1.03116e+07	2.05572e+07	1.17925e+07	1.12328e+07	8.69979e+06	9.58443e+06	6.21388e+06	9.65337e+06	6.49967e+06	6.73709e+06	2.19379e+06	8.99185e+06	5.75888e+06	8.53883e+06	423477	320947	169351	6.24492e+06	6.53917e+06	6.933e+06	8.92693e+06	7.26851e+06	7.46025e+06	7.39582e+06	4.21856e+06	4.34532e+06	1.4168e+07	1.37652e+07
(S)-1-Pyrroline-5-carboxylate@1.128-rp	1.18389e+08	1.17605e+08	8.66118e+07	9.71695e+07	7.36527e+07	1.0078e+08	1.77011e+08	1.22019e+08	9.88952e+07	2.36418e+08	2.68024e+08	1.23527e+08	284037220	2.30136e+08	1.74821e+08	1.46715e+08	2.25422e+08	2.1306e+08	1.42705e+08	7.39491e+07	1.36988e+08	9.86914e+07	1.77647e+08	919047	1.01447e+06	978121	1.21212e+08	1.20961e+08	1.06635e+08	1.25368e+08	1.10347e+08	1.81014e+07	3.46127e+07	1.79123e+07	3.57848e+07	3.44639e+07	3.61788e+07
113.05526@4.711-rp	2.65369e+06	2.73266e+06	2.26415e+06	2.57781e+06	2.04266e+06	2.81872e+06	114929	100204	119414	123103	91245.9	106162	111441	104304	117201	108343	124375	98979.9	128644	108214	128063	76670.5	126940	117099	92072.2	105087	264153	368248	411201	451068	341122	101363	108110	74278.7	109411	107992	82684.3
Creatinine@1.063-rp	6.30311e+08	1093360002	3.16512e+08	3.31608e+08	2.14976e+08	1015067460	1.39034e+07	2.22835e+07	6.46805e+06	8.79562e+06	5.82528e+06	1.30746e+08	1485949893	1248988830	1122239441	3.9912e+08	1353681482	1.56859e+07	7.48139e+08	5.59412e+08	3.97307e+08	3.13942e+08	379904268	347277	369528	279561	5.82638e+08	5.7625e+08	5.83708e+08	5.68508e+08	5.37828e+08	8.46193e+06	15362711	5.0318e+06	1.69072e+07	1.7708e+07	1.57871e+07
Creatinine@1.217-rp	8.42535e+07	4.4638e+07	3.61093e+07	4.32885e+07	2.78667e+07	4.77704e+07	2.89818e+07	7.88721e+07	2.25602e+07	6.55441e+07	7.08271e+07	38579103	1.20036e+08	1.27148e+08	105257917	4.12032e+07	9.79075e+07	5.02236e+07	8.35411e+07	5.69249e+07	3.62738e+07	2.84263e+07	5.67457e+07	192136	245686	70867.6	4.68764e+07	4.23668e+07	5.69659e+07	5.69765e+07	4.6584e+07	2.52197e+06	2.73651e+06	2.06927e+06	3.14735e+06	5.85284e+06	6.27919e+06
113.08323@1.13-rp	1.03072e+06	725501	223719	463708	94934.1	537757	292496	1.07601e+06	719691	236059	325336	641140	406676	242643	745844	91698.6	593916	123382	768681	305965	64695.9	200823	1.34868e+06	14176.4	12386.4	10623.8	329255	383519	255257	277109	339550	97858.8	148017	212610	142401	98564	633457
e-Caprolactam@1.107-rp	2.01398e+07	8.00241e+06	4.7972e+06	5.0874e+06	3.20479e+06	6.98464e+06	1.54832e+08	2.65979e+08	6.87073e+07	1.93571e+08	2.25923e+08	7.75097e+07	1.20491e+08	7.21378e+07	6.07221e+07	2.44398e+07	9.31623e+07	4.10128e+07	7.2656e+07	7.11756e+07	5.20446e+07	5.88256e+07	8.22227e+07	87348.2	332300	364418	7.40843e+07	7.38056e+07	6.58217e+07	6.96582e+07	6.4444e+07	4.34989e+07	1.06606e+08	3.82233e+07	1.26358e+08	4.31536e+07	3.31432e+07
113.58174@1.037-rp	1.15349e+07	1.60258e+07	9.1004e+06	1.0352e+07	8.2968e+06	1.37833e+07	421926	790405	293429	743113	633868	864729	1.24577e+06	828596	1.03543e+06	534114	1.3565e+06	620639	683574	296514	232854	1.50284e+06	439306	34929.7	32726.4	22826.7	2.31532e+06	2.05715e+06	2.38385e+06	2.36156e+06	2.73544e+06	253318	385196	374610	472027	328157	266704
Thiosulficacid@0.963-rp	2.13904e+06	1.46747e+06	1.89907e+06	2.81513e+06	1.5481e+06	1.52064e+06	1.3334e+06	1.03583e+06	1.09334e+06	1.07258e+06	1.72267e+06	1.84797e+06	1.629e+06	758698	1.14518e+06	2.02409e+06	1.10574e+06	1.11565e+06	1.43678e+06	544501	1.57467e+06	933804	1.23144e+06	514552	416835	163684	1.3858e+06	1.4039e+06	1.39196e+06	1.56144e+06	1.34159e+06	715844	1.4502e+06	1.84454e+06	1.08464e+06	755653	612697
2-Hydroxy-2-4-pentadienoate@2.247-rp	214560	1.15533e+06	146919	184018	69561.8	1.07923e+06	665427	2.30219e+06	621233	3.08254e+06	1.81248e+06	1.53809e+06	3.62768e+06	1.79021e+06	303885	1.04212e+06	629995	412426	1.26589e+06	436277	547237	854018	3.00615e+06	494825	558624	481602	1.03026e+06	1.12763e+06	1.00101e+06	1.3049e+06	1.10739e+06	904391	2.09501e+06	1.22603e+06	1.29973e+06	222571	322896
2-Hydroxy-2-4-pentadienoate@3.015-rp	2.53678e+06	987829	1.12322e+06	1.49267e+06	601384	943013	588164	737681	196602	1.19604e+06	576000	197609	743552	1.44433e+06	1.08368e+06	1.32989e+06	1.71584e+06	492813	115077	346565	195484	182675	781338	328938	458805	336869	945158	986173	1.0442e+06	1.10433e+06	1.14367e+06	487766	2.60037e+06	664897	2.33465e+06	1.0955e+06	481186
2-Hydroxy-2-4-pentadienoate@1.11-rp	3.69291e+07	2.49025e+07	3.74952e+07	2.58243e+07	2.77736e+07	2.80465e+07	1.5075e+07	3.06121e+07	1.35534e+07	2.16492e+07	2.00811e+07	1.29076e+07	1.72966e+07	2.32655e+07	1.96575e+07	1.08991e+07	2.10378e+07	1.45194e+07	2.41848e+07	1.36384e+07	1.04646e+07	1.10427e+07	1.59795e+07	743446	1.44656e+06	929488	2.11784e+07	1.95749e+07	1.94551e+07	1.79738e+07	1.88808e+07	1.22825e+07	2.10288e+07	9.73622e+06	2.72114e+07	2.15266e+07	1.86911e+07
2-Hydroxy-2-4-pentadienoate@1.483-rp	3.57762e+07	2.64775e+07	2.16024e+07	1.84118e+07	2.02689e+07	2.55441e+07	2.6428e+07	4.39645e+07	1.85562e+07	2.79679e+07	3.45616e+07	3.28619e+07	3.13713e+07	2.22281e+07	2.65044e+07	2.19244e+07	2.99075e+07	2.42189e+07	2.76624e+07	2.55863e+07	2.11275e+07	1.75326e+07	2.30335e+07	1.03663e+06	1.66595e+06	1.05856e+06	2.53582e+07	2.44306e+07	2.41103e+07	2.45537e+07	2.42145e+07	1.95898e+07	2.45869e+07	1.07633e+07	2.32475e+07	3.14126e+07	2.48919e+07
2-5-Dioxopiperazine@1.808-rp	535253	200057	225116	148831	210919	198330	217738	420410	210115	268391	312868	289039	1.10678e+07	7.55571e+06	1.7904e+06	1.21645e+06	2.70914e+06	282081	400820	128160	338567	264700	462805	157564	181359	137123	617148	785168	703621	687987	636587	138999	197973	99416.9	223150	289278	272666
3-Hydroxycyclohexanone@9.139-rp	358054	83184.4	280217	279611	319823	270134	341286	332617	312753	69359.8	342187	306620	289860	357027	261631	62307.1	304601	296266	318714	288830	284265	298793	308030	488523	88875.6	219773	252754	193661	239970	304503	243985	1.18625e+06	812301	3.14195e+06	523175	1.12246e+06	986584
formylpiperazine@1.038-rp	3.80066e+07	5.67342e+07	2.17331e+07	4.71828e+07	1.72391e+07	2.9509e+07	2.27022e+07	3.95047e+07	4.82954e+06	3.18365e+07	3.72459e+07	3.39069e+07	2.05374e+08	1.60425e+08	9.94175e+07	3.72105e+07	1.31421e+08	7.57099e+07	1.15957e+08	3.52908e+07	3.21179e+07	2.54657e+07	8.48667e+07	1.07757e+06	1.09819e+06	831250	3.10294e+07	2.94027e+07	3.29285e+07	3.04233e+07	3.41924e+07	5.08638e+06	1.18765e+07	4.03214e+06	3.3895e+07	3.70512e+07	3.55726e+07
114.57042@1.059-rp	1.20969e+06	3.30495e+06	2.69105e+06	2.93403e+06	2.77545e+06	2.97934e+06	874721	2.83999e+06	249183	1.16197e+06	7.83194e+06	1.35902e+06	7.51668e+06	2.50132e+06	1.40055e+06	1.20388e+06	3.19825e+06	2.49338e+06	594516	473315	357378	210259	861774	24628.2	20747	16094.6	3.28124e+06	2.77072e+06	3.26608e+06	3.19862e+06	3.03179e+06	1.18725e+06	2.24087e+06	983381	4.61416e+06	2.20236e+06	1.53973e+06
[truncated: 21,853 more rows]

## Sheet: AreaQCCorr
	colon-686-ATB_81	colon-688-ATB_83	colon-690-ATB_85	colon-691-ATB_86	colon-692-ATB_87	colon-694-ATB_89	colon-666-FMT_61	colon-669-FMT_64	colon-670-FMT_65	colon-678-FMT_73	colon-682-FMT_77	colon-683-FMT_78	colon-668-FMT-AKK_63	colon-672-FMT-AKK_67	colon-674-FMT-AKK_69	colon-675-FMT-AKK_70	colon-679-FMT-AKK_74	colon-680-FMT-AKK_75	colon-667-FMT-AKK-Pas_62	colon-671-FMT-AKK-Pas_66	colon-676-FMT-AKK-Pas_71	colon-677-FMT-AKK-Pas_72	colon-681-FMT-AKK-Pas_76	Bl_matrice-colon_3a	Bl_matrice-colon_3b	Bl_matrice-colon_3c	QC_colon_4b	QC_colon_4c	QC_colon_4d	QC_colon_4e	QC_colon_4e_191121162904	colon-684-SPF_79	colon-685-SPF_80	colon-687-SPF_82	colon-689-SPF_84	colon-693-SPF_88	colon-695-SPF_90
[truncated: 22,168 more rows]

[truncated: 2 more sheets: FoldChangeLog2, pvalue]
