# Supplementary material for: Oral administration of Akkermansia muciniphila elevates systemic antiaging and anticancer metabolites
Source: Aging (Albany NY). 2021 Mar 2;13(5):6375–405. doi: 10.18632/aging.202739 (PMC7993698; doi:10.18632/aging.202739)
Supplement: Supplementary Table 7 [file aging-13-202739-s008.xlsx]

## Sheet: SampleInfos
Supplementary Table 7. Related to Figures 5, 6. Metabolic signature obtained through untargeted metabolomic analysis from LIVER samples from mice treated with FMT, Akk or with Akk-past (versus PBS or continuous ATB).
Sid	sType	Grp	Color
liver-690-ATB_55	Sa	ATB	#FB6A4A
liver-692-ATB_57	Sa	ATB	#FB6A4A
liver-686-ATB_51	Sa	ATB	#FB6A4A
liver-688-ATB_53	Sa	ATB	#FB6A4A
liver-691-ATB_56	Sa	ATB	#FB6A4A
liver-694-ATB_59	Sa	ATB	#FB6A4A
liver-666-FMT_31	Sa	FMT	#9E9AC8
liver-670-FMT_35	Sa	FMT	#9E9AC8
liver-683-FMT_48	Sa	FMT	#9E9AC8
liver-682-FMT_47	Sa	FMT	#9E9AC8
liver-678-FMT_43	Sa	FMT	#9E9AC8
liver-669-FMT_34	Sa	FMT	#9E9AC8
liver-668-FMT-AKK_33	Sa	FMT-AKK	#7960AB
liver-675-FMT-AKK_40	Sa	FMT-AKK	#7960AB
liver-680-FMT-AKK_45	Sa	FMT-AKK	#7960AB
liver-679-FMT-AKK_44	Sa	FMT-AKK	#7960AB
liver-672-FMT-AKK_37	Sa	FMT-AKK	#7960AB
liver-674-FMT-AKK_39	Sa	FMT-AKK	#7960AB
liver-667-FMT-AKK-Pas_32	Sa	FMT-AKK-Pas	#54278F
liver-681-FMT-AKK-Pas_46	Sa	FMT-AKK-Pas	#54278F
liver-676-FMT-AKK-Pas_41	Sa	FMT-AKK-Pas	#54278F
liver-673-FMT-AKK-Pas_38	Sa	FMT-AKK-Pas	#54278F
liver-677-FMT-AKK-Pas_42	Sa	FMT-AKK-Pas	#54278F
liver-671-FMT-AKK-Pas_36	Sa	FMT-AKK-Pas	#54278F
Bl_matrice-liver_5a	Bl	#N/A	#N/A
QC_liver_6a	QC	#N/A	#N/A
QC_liver_6b	QC	#N/A	#N/A
QC_liver_6c	QC	#N/A	#N/A
QC_liver_6d	QC	#N/A	#N/A
QC_liver_6e	QC	#N/A	#N/A
QC_batch_6f	QC	#N/A	#N/A
Bl_matrice_5b	Bl	#N/A	#N/A
liver-684-SPF_49	Sa	SPF	#74C476
liver-685-SPF_50	Sa	SPF	#74C476
liver-689-SPF_54	Sa	SPF	#74C476
liver-687-SPF_52	Sa	SPF	#74C476
liver-693-SPF_58	Sa	SPF	#74C476
liver-695-SPF_60	Sa	SPF	#74C476

## Sheet: MetabolitesInfos
Checked	Analyte	MetName	MW	RT	MF	CSID	KEGG	Method
VRAI	delta-Valerolactone@1.06-rp	delta-Valerolactone	100.052	1.06	C5H8O2	10488	Other	rp
VRAI	445.08937@1.425-rp	#N/A	445.089	1.425	#N/A	#N/A	#N/A	rp
VRAI	640.19457@9.088-rp	#N/A	640.195	9.088	C24H36N2O18	#N/A	#N/A	rp
FAUX	100.00102@0.834-rp	#N/A	100.001	0.834	#N/A	#N/A	#N/A	rp
FAUX	100.01591@1.553-rp	#N/A	100.016	1.553	C4H4O3	#N/A	#N/A	rp
FAUX	100.01604@5.677-rp	#N/A	100.016	5.677	C4H4O3	#N/A	#N/A	rp
FAUX	100.05139@1.071-rp	#N/A	100.051	1.071	#N/A	#N/A	#N/A	rp
FAUX	101.00169@0.824-rp	#N/A	101.002	0.824	#N/A	#N/A	#N/A	rp
FAUX	Carboxycyclopropylamine@1.011-rp	Carboxycyclopropylamine	101.047	1.011	C4H7NO2	#N/A	Metabolic pathways;Biosynthesis of secondary metabolites;Biosynthesis of plant secondary metabolites;Biosynthesis of plant hormones;Other	rp
FAUX	101.9985@0.831-rp	#N/A	101.999	0.831	C2H3N2OP	#N/A	#N/A	rp
FAUX	2-methyl-3-oxopropanoicacid@1.053-rp	2-methyl-3-oxopropanoicacid	102.032	1.053	C4H6O3	#N/A	Metabolic pathways;Biosynthesis of secondary metabolites;Microbial metabolism in diverse environments;Biosynthesis of amino acids;2-Oxocarboxylic acid metabolism;Carbon metabolism;Other	rp
FAUX	2-methyl-3-oxopropanoicacid@1.428-rp	2-methyl-3-oxopropanoicacid	102.032	1.428	C4H6O3	#N/A	Metabolic pathways;Biosynthesis of secondary metabolites;Microbial metabolism in diverse environments;Biosynthesis of amino acids;2-Oxocarboxylic acid metabolism;Carbon metabolism;Other	rp
FAUX	102.04692@1.903-rp	#N/A	102.047	1.903	C8H6	#N/A	#N/A	rp
FAUX	2-aminobutyricacid@1.038-rp	2-aminobutyricacid	103.063	1.038	C4H9NO2	#N/A	Metabolic pathways;Microbial metabolism in diverse environments;Other	rp
FAUX	Choline@0.998-rp	Choline	103.1	0.998	C5H13NO	#N/A	#N/A	rp
FAUX	103.98496@0.921-rp	#N/A	103.985	0.921	#N/A	#N/A	#N/A	rp
FAUX	2-hydroxy-3-oxopropanoicacid@1.059-rp	2-hydroxy-3-oxopropanoicacid	104.011	1.059	C3H4O4	#N/A	Metabolic pathways;Biosynthesis of secondary metabolites;Microbial metabolism in diverse environments;Carbon metabolism;Other	rp
FAUX	104.0262@5.966-rp	#N/A	104.026	5.966	C7H4O	#N/A	#N/A	rp
FAUX	105.02138@2.397-rp	#N/A	105.021	2.397	C6H3NO	#N/A	#N/A	rp
FAUX	Serine@1.008-rp	Serine	105.042	1.008	C3H7NO3	#N/A	Metabolic pathways;Biosynthesis of secondary metabolites;Microbial metabolism in diverse environments;Biosynthesis of plant secondary metabolites;Biosynthesis of amino acids;ABC transporters;Carbon metabolism;Other	rp
FAUX	108.02102@1.061-rp	#N/A	108.021	1.061	C6H4O2	#N/A	Microbial metabolism in diverse environments;Other	rp
FAUX	Hypotaurine@1.009-rp	Hypotaurine	109.02	1.009	C2H7NO2S	96959	Metabolic pathways;Other	rp
FAUX	109.06391@0.986-rp	#N/A	109.064	0.986	C5H7N3	#N/A	#N/A	rp
FAUX	109.06392@0.895-rp	#N/A	109.064	0.895	C5H7N3	#N/A	#N/A	rp
FAUX	2,5-dihydroxypyridine@1.713-rp	2,5-dihydroxypyridine	111.032	1.713	C5H5NO2	#N/A	Metabolic pathways;Microbial metabolism in diverse environments;Other	rp
FAUX	111.04236@1.072-rp	#N/A	111.042	1.072	#N/A	#N/A	#N/A	rp
FAUX	Cytosine@1.107-rp	Cytosine	111.043	1.107	C4H5N3O	577	Metabolic pathways;Other	rp
FAUX	Hydroxymethylphosphonicacid@1.052-rp	Hydroxymethylphosphonicacid	111.993	1.052	CH5O4P	#N/A	Biosynthesis of secondary metabolites;Other	rp
FAUX	2-furoicacid@1.124-rp	2-furoicacid	112.016	1.124	C5H4O3	#N/A	Metabolic pathways;Microbial metabolism in diverse environments;Other	rp
FAUX	Uracil@1.717-rp	Uracil	112.027	1.717	C4H4N2O2	1141	Metabolic pathways;Other	rp
FAUX	112.99585@1.14-rp	#N/A	112.996	1.14	#N/A	#N/A	#N/A	rp
FAUX	1-pyrroline-2-carboxylicacid@1.046-rp	1-pyrroline-2-carboxylicacid	113.048	1.046	C5H7NO2	#N/A	Metabolic pathways;Biosynthesis of secondary metabolites;Biosynthesis of amino acids;Other	rp
FAUX	113.05305@0.99-rp	#N/A	113.053	0.99	#N/A	#N/A	#N/A	rp
FAUX	Creatinine@1.019-rp	Creatinine	113.059	1.019	C4H7N3O	568	Metabolic pathways;Other	rp
FAUX	Creatinine@1.005-rp	Creatinine	113.059	1.005	C4H7N3O	568	#N/A	rp
FAUX	113.94021@1.233-rp	#N/A	113.94	1.233	#N/A	#N/A	#N/A	rp
FAUX	2-butynedioicacid@1.139-rp	2-butynedioicacid	113.995	1.139	C4H2O4	#N/A	Other	rp
FAUX	2-hydroxy-2,4-pentadienoate@2.2-rp	2-hydroxy-2,4-pentadienoate	114.032	2.2	C5H6O3	#N/A	Metabolic pathways;Microbial metabolism in diverse environments;Degradation of aromatic compounds;Phenylalanine metabolism;Other	rp
FAUX	2-hydroxy-2,4-pentadienoate@2.977-rp	2-hydroxy-2,4-pentadienoate	114.032	2.977	C5H6O3	#N/A	Metabolic pathways;Microbial metabolism in diverse environments;Degradation of aromatic compounds;Phenylalanine metabolism;Other	rp
FAUX	2-hydroxy-2,4-pentadienoate@1.02-rp	2-hydroxy-2,4-pentadienoate	114.032	1.02	C5H6O3	#N/A	Metabolic pathways;Microbial metabolism in diverse environments;Degradation of aromatic compounds;Phenylalanine metabolism;Other	rp
FAUX	114.07924@0.877-rp	#N/A	114.079	0.877	C5H10N2O	#N/A	#N/A	rp
FAUX	115.00901@1.271-rp	#N/A	115.009	1.271	#N/A	#N/A	#N/A	rp
FAUX	Maleamicacid@1.012-rp	Maleamicacid	115.027	1.012	C4H5NO3	4444106	Metabolic pathways;Microbial metabolism in diverse environments;Other	rp
FAUX	115.03829@1.102-rp	#N/A	115.038	1.102	C3H5N3O2	#N/A	#N/A	rp
FAUX	115.03887@1.09-rp	#N/A	115.039	1.09	#N/A	#N/A	#N/A	rp
FAUX	Proline@1.072-rp	Proline	115.063	1.072	C5H9NO2	#N/A	Metabolic pathways;Biosynthesis of secondary metabolites;Biosynthesis of amino acids;ABC transporters;Other	rp
FAUX	Proline@1.672-rp	Proline	115.063	1.672	C5H9NO2	#N/A	Metabolic pathways;Biosynthesis of secondary metabolites;Biosynthesis of amino acids;ABC transporters;Other	rp
FAUX	Fumaricacid@1.569-rp	Fumaricacid	116.011	1.569	C4H4O4	10197150	Metabolic pathways;Biosynthesis of secondary metabolites;Microbial metabolism in diverse environments;Biosynthesis of plant secondary metabolites;Degradation of aromatic compounds;Biosynthesis of phenylpropanoids;Biosynthesis of plant hormones;Biosynthesis of alkaloids derived from shikimate pathway;Phenylalanine metabolism;Carbon metabolism;Other	rp
FAUX	Phenylacetonitrile@3.078-rp	Phenylacetonitrile	117.058	3.078	C8H7N	#N/A	Metabolic pathways;Biosynthesis of secondary metabolites;Microbial metabolism in diverse environments;Other	rp
FAUX	Phenylacetonitrile@1.902-rp	Phenylacetonitrile	117.058	1.902	C8H7N	#N/A	Metabolic pathways;Biosynthesis of secondary metabolites;Microbial metabolism in diverse environments;Other	rp
FAUX	4-methylaminobutyricacid@1.093-rp	4-methylaminobutyricacid	117.079	1.093	C5H11NO2	63869	Metabolic pathways;Biosynthesis of secondary metabolites;Microbial metabolism in diverse environments;Biosynthesis of plant secondary metabolites;Biosynthesis of amino acids;2-Oxocarboxylic acid metabolism;ABC transporters;Biosynthesis of alkaloids derived from shikimate pathway;Other	rp
FAUX	117.9799@0.954-rp	#N/A	117.98	0.954	#N/A	#N/A	#N/A	rp
FAUX	118.01157@0.833-rp	#N/A	118.012	0.833	#N/A	#N/A	#N/A	rp
FAUX	2-ethoxy-2-oxoaceticacid@1.553-rp	2-ethoxy-2-oxoaceticacid	118.027	1.553	C4H6O4	#N/A	Metabolic pathways;Biosynthesis of secondary metabolites;Microbial metabolism in diverse environments;Biosynthesis of plant secondary metabolites;Degradation of aromatic compounds;Biosynthesis of phenylpropanoids;Biosynthesis of plant hormones;Biosynthesis of alkaloids derived from shikimate pathway;Phenylalanine metabolism;Carbon metabolism;Other	rp
FAUX	118.02793@4.297-rp	#N/A	118.028	4.297	C5H2N4	#N/A	#N/A	rp
FAUX	118.02794@1.58-rp	#N/A	118.028	1.58	C5H2N4	#N/A	#N/A	rp
FAUX	118.02794@3.383-rp	#N/A	118.028	3.383	C5H2N4	#N/A	#N/A	rp
FAUX	118.02796@2.407-rp	#N/A	118.028	2.407	C5H2N4	#N/A	#N/A	rp
FAUX	2-hydroxy-2-methylbutyricacid@2.523-rp	2-hydroxy-2-methylbutyricacid	118.063	2.523	C5H10O3	#N/A	Metabolic pathways;Other	rp
FAUX	119.01238@0.834-rp	#N/A	119.012	0.834	C5HN3O	#N/A	#N/A	rp
FAUX	119.03711@4.41-rp	#N/A	119.037	4.41	C7H5NO	#N/A	#N/A	rp
FAUX	2-methylserine@1.008-rp	2-methylserine	119.058	1.008	C4H9NO3	#N/A	Metabolic pathways;Biosynthesis of secondary metabolites;Microbial metabolism in diverse environments;Biosynthesis of plant secondary metabolites;Biosynthesis of amino acids;ABC transporters;Other	rp
FAUX	119.07358@8.09-rp	#N/A	119.074	8.09	C8H9N	#N/A	#N/A	rp
FAUX	119.09459@0.978-rp	#N/A	119.095	0.978	C5H13NO2	#N/A	#N/A	rp
FAUX	119.95892@0.929-rp	#N/A	119.959	0.929	#N/A	#N/A	#N/A	rp
FAUX	120.0091@0.834-rp	#N/A	120.009	0.834	C2H5N2O2P	#N/A	#N/A	rp
FAUX	Erythrose@1.033-rp	Erythrose	120.042	1.033	C4H8O4	#N/A	#N/A	rp
FAUX	122.03298@0.843-rp	#N/A	122.033	0.843	C2H6N2O4	#N/A	#N/A	rp
FAUX	2-hydroxybenzaldehyde@1.457-rp	2-hydroxybenzaldehyde	122.037	1.457	C7H6O2	#N/A	Metabolic pathways;Biosynthesis of secondary metabolites;Microbial metabolism in diverse environments;Degradation of aromatic compounds;Biosynthesis of phenylpropanoids;Biosynthesis of alkaloids derived from shikimate pathway;Phenylalanine metabolism;Other	rp
FAUX	Niacinamide@1.816-rp	Niacinamide	122.048	1.816	C6H6N2O	#N/A	Metabolic pathways;Other	rp
FAUX	Niacinamide@2.562-rp	Niacinamide	122.048	2.562	C6H6N2O	#N/A	Metabolic pathways;Other	rp
FAUX	122.58688@0.986-rp	#N/A	122.587	0.986	#N/A	#N/A	#N/A	rp
FAUX	122.99905@0.999-rp	#N/A	122.999	0.999	C2H5NO3S	#N/A	#N/A	rp
FAUX	123.0083@1.037-rp	#N/A	123.008	1.037	C2H6NO3P	#N/A	#N/A	rp
FAUX	123.01699@0.842-rp	#N/A	123.017	0.842	C2H5NO5	#N/A	#N/A	rp
FAUX	Isonicotinicacid@1.6-rp	Isonicotinicacid	123.032	1.6	C6H5NO2	5709	Metabolic pathways;Biosynthesis of secondary metabolites;Microbial metabolism in diverse environments;Biosynthesis of plant secondary metabolites;Degradation of aromatic compounds;Other	rp
FAUX	2-sulfoacetaldehyde@1.096-rp	2-sulfoacetaldehyde	123.983	1.096	C2H4O4S	#N/A	Metabolic pathways;Microbial metabolism in diverse environments;Other	rp
FAUX	Phosphonoacetaldehyde@1.007-rp	Phosphonoacetaldehyde	123.993	1.007	C2H5O4P	#N/A	Metabolic pathways;Biosynthesis of secondary metabolites;Microbial metabolism in diverse environments;Other	rp
FAUX	124.01778@0.845-rp	#N/A	124.018	0.845	#N/A	#N/A	#N/A	rp
FAUX	124.01864@0.842-rp	#N/A	124.019	0.842	#N/A	#N/A	#N/A	rp
FAUX	Taurine@1.008-rp	Taurine	125.015	1.008	C2H7NO3S	1091	Metabolic pathways;ABC transporters;Other	rp
FAUX	125.02248@1.765-rp	#N/A	125.022	1.765	C4H3N3O2	#N/A	#N/A	rp
FAUX	3,6-dihydronicotinicacid@1.708-rp	3,6-dihydronicotinicacid	125.048	1.708	C6H7NO2	#N/A	Biosynthesis of secondary metabolites;Microbial metabolism in diverse environments;Other	rp
FAUX	2-hydroxyethanesulfonicacid@1.062-rp	2-hydroxyethanesulfonicacid	125.999	1.062	C2H6O4S	#N/A	Metabolic pathways;Other	rp
FAUX	2-hydroxyethanesulfonicacid@1.385-rp	2-hydroxyethanesulfonicacid	125.999	1.385	C2H6O4S	#N/A	Metabolic pathways;Other	rp
FAUX	2-hydroxyethylphosphonicacid@1.076-rp	2-hydroxyethylphosphonicacid	126.008	1.076	C2H7O4P	#N/A	Metabolic pathways;Biosynthesis of secondary metabolites;Other	rp
FAUX	126.01785@1.017-rp	#N/A	126.018	1.017	C3H2N4O2	#N/A	#N/A	rp
FAUX	126.02515@1.207-rp	#N/A	126.025	1.207	C5H6N2S	#N/A	#N/A	rp
FAUX	5hydroxymethylfurfural@1.054-rp	5hydroxymethylfurfural	126.032	1.054	C6H6O3	#N/A	Metabolic pathways;Biosynthesis of secondary metabolites;Microbial metabolism in diverse environments;Other	rp
FAUX	126.10468@9.853-rp	#N/A	126.105	9.853	C8H14O	#N/A	Metabolic pathways;Biosynthesis of secondary metabolites;Other	rp
FAUX	2-hydroxyhexdienoicacid@1.957-rp	2-hydroxyhexdienoicacid	128.047	1.957	C6H8O3	#N/A	Metabolic pathways;Microbial metabolism in diverse environments;Degradation of aromatic compounds;Other	rp
FAUX	2-hydroxyhexdienoicacid@5.672-rp	2-hydroxyhexdienoicacid	128.047	5.672	C6H8O3	#N/A	Metabolic pathways;Microbial metabolism in diverse environments;Degradation of aromatic compounds;Other	rp
FAUX	4-amino-4-cyanobutanoicacid@1.051-rp	4-amino-4-cyanobutanoicacid	128.058	1.051	C5H8N2O2	#N/A	Metabolic pathways;Other	rp
FAUX	4-amino-4-cyanobutanoicacid@1.456-rp	4-amino-4-cyanobutanoicacid	128.059	1.456	C5H8N2O2	#N/A	Metabolic pathways;Other	rp
FAUX	Octanal@11.76-rp	Octanal	128.12	11.76	C8H16O	441	#N/A	rp
FAUX	129.02473@1.57-rp	#N/A	129.025	1.57	#N/A	#N/A	#N/A	rp
FAUX	4-oxoproline@1.009-rp	4-oxoproline	129.042	1.009	C5H7NO3	#N/A	Metabolic pathways;Biosynthesis of secondary metabolites;Other	rp
FAUX	4-oxoproline@1.449-rp	4-oxoproline	129.043	1.449	C5H7NO3	#N/A	Metabolic pathways;Biosynthesis of secondary metabolites;Other	rp
FAUX	4-oxoproline@1.273-rp	4-oxoproline	129.043	1.273	C5H7NO3	#N/A	Metabolic pathways;Biosynthesis of secondary metabolites;Other	rp
FAUX	4-oxoproline@1.674-rp	4-oxoproline	129.043	1.674	C5H7NO3	#N/A	Metabolic pathways;Biosynthesis of secondary metabolites;Other	rp
FAUX	129.05777@10.936-rp	#N/A	129.058	10.936	C9H7N	#N/A	#N/A	rp
FAUX	129.0578@3.079-rp	#N/A	129.058	3.079	C9H7N	#N/A	#N/A	rp
FAUX	4-acetamidobutanal@1.193-rp	4-acetamidobutanal	129.079	1.193	C6H11NO2	389692	Metabolic pathways;Biosynthesis of secondary metabolites;Biosynthesis of plant secondary metabolites;Other	rp
FAUX	2,5-dioxopentanoicacid@1.174-rp	2,5-dioxopentanoicacid	130.027	1.174	C5H6O4	#N/A	Metabolic pathways;Microbial metabolism in diverse environments;2-Oxocarboxylic acid metabolism;Carbon metabolism;Other	rp
FAUX	2,5-dioxopentanoicacid@1.426-rp	2,5-dioxopentanoicacid	130.027	1.426	C5H6O4	#N/A	Metabolic pathways;Microbial metabolism in diverse environments;2-Oxocarboxylic acid metabolism;Carbon metabolism;Other	rp
FAUX	2,5-dioxopentanoicacid@2.206-rp	2,5-dioxopentanoicacid	130.027	2.206	C5H6O4	#N/A	Metabolic pathways;Microbial metabolism in diverse environments;2-Oxocarboxylic acid metabolism;Carbon metabolism;Other	rp
FAUX	130.04196@9.22-rp	#N/A	130.042	9.22	C9H6O	#N/A	#N/A	rp
FAUX	131.03711@4.841-rp	#N/A	131.037	4.841	C8H5NO	#N/A	#N/A	rp
FAUX	2-amino-4-oxopentanoicacid@1.014-rp	2-amino-4-oxopentanoicacid	131.058	1.014	C5H9NO3	#N/A	Metabolic pathways;Biosynthesis of secondary metabolites;Microbial metabolism in diverse environments;Biosynthesis of plant secondary metabolites;Biosynthesis of amino acids;ABC transporters;Other	rp
FAUX	2-amino-4-oxopentanoicacid@1.658-rp	2-amino-4-oxopentanoicacid	131.058	1.658	C5H9NO3	#N/A	Metabolic pathways;Biosynthesis of secondary metabolites;Microbial metabolism in diverse environments;Biosynthesis of plant secondary metabolites;Biosynthesis of amino acids;ABC transporters;Other	rp
FAUX	Creatine@1.064-rp	Creatine	131.069	1.064	C4H9N3O2	566	Metabolic pathways;Other	rp
FAUX	131.07345@3.078-rp	#N/A	131.073	3.078	C9H9N	#N/A	Other	rp
FAUX	Alloisoleucine@1.029-rp	Alloisoleucine	131.095	1.029	C6H13NO2	#N/A	Metabolic pathways;Biosynthesis of secondary metabolites;Microbial metabolism in diverse environments;Biosynthesis of plant secondary metabolites;Biosynthesis of amino acids;2-Oxocarboxylic acid metabolism;ABC transporters;Other	rp
FAUX	Alloisoleucine@1.323-rp	Alloisoleucine	131.095	1.323	C6H13NO2	#N/A	Metabolic pathways;Biosynthesis of secondary metabolites;Microbial metabolism in diverse environments;Biosynthesis of plant secondary metabolites;Biosynthesis of amino acids;2-Oxocarboxylic acid metabolism;ABC transporters;Other	rp
FAUX	Alloisoleucine@7.079-rp	Alloisoleucine	131.095	7.079	C6H13NO2	#N/A	Metabolic pathways;Biosynthesis of secondary metabolites;Microbial metabolism in diverse environments;Biosynthesis of plant secondary metabolites;Biosynthesis of amino acids;2-Oxocarboxylic acid metabolism;ABC transporters;Other	rp
FAUX	132.02436@1.217-rp	#N/A	132.024	1.217	C5H8O2S	#N/A	#N/A	rp
FAUX	2-acetolacticacid@1.717-rp	2-acetolacticacid	132.042	1.717	C5H8O4	#N/A	Metabolic pathways;Biosynthesis of secondary metabolites;Microbial metabolism in diverse environments;Biosynthesis of amino acids;Degradation of aromatic compounds;2-Oxocarboxylic acid metabolism;Phenylalanine metabolism;Other	rp
FAUX	2-acetolacticacid@1.033-rp	2-acetolacticacid	132.042	1.033	C5H8O4	#N/A	Metabolic pathways;Biosynthesis of secondary metabolites;Microbial metabolism in diverse environments;Biosynthesis of amino acids;Degradation of aromatic compounds;2-Oxocarboxylic acid metabolism;Phenylalanine metabolism;Other	rp
FAUX	2-acetolacticacid@2.197-rp	2-acetolacticacid	132.042	2.197	C5H8O4	#N/A	Metabolic pathways;Biosynthesis of secondary metabolites;Microbial metabolism in diverse environments;Biosynthesis of amino acids;Degradation of aromatic compounds;2-Oxocarboxylic acid metabolism;Phenylalanine metabolism;Other	rp
FAUX	132.05203@1.12-rp	#N/A	132.052	1.12	#N/A	#N/A	#N/A	rp
FAUX	3-ureidopropionicacid@1.415-rp	3-ureidopropionicacid	132.053	1.415	C4H8N2O3	#N/A	Metabolic pathways;Biosynthesis of secondary metabolites;Biosynthesis of plant secondary metabolites;Biosynthesis of amino acids;Other	rp
FAUX	3-ureidopropionicacid@0.978-rp	3-ureidopropionicacid	132.053	0.978	C4H8N2O3	#N/A	Metabolic pathways;Biosynthesis of secondary metabolites;Biosynthesis of plant secondary metabolites;Biosynthesis of amino acids;Other	rp
FAUX	133.01972@3.382-rp	#N/A	133.02	3.382	C4H7NO2S	#N/A	#N/A	rp
FAUX	Asparticacid@1.009-rp	Asparticacid	133.037	1.009	C4H7NO4	#N/A	Metabolic pathways;Biosynthesis of secondary metabolites;Microbial metabolism in diverse environments;Biosynthesis of plant secondary metabolites;Biosynthesis of amino acids;2-Oxocarboxylic acid metabolism;ABC transporters;Biosynthesis of plant hormones;Carbon metabolism;Histidine metabolism;Other	rp
FAUX	Ureidoglycine@1.103-rp	Ureidoglycine	133.049	1.103	C3H7N3O3	#N/A	Metabolic pathways;Microbial metabolism in diverse environments;Purine metabolism	rp
FAUX	4-hydroxyindole@4.915-rp	4-hydroxyindole	133.053	4.915	C8H7NO	#N/A	Metabolic pathways;Biosynthesis of secondary metabolites;Other	rp
FAUX	4-hydroxyindole@7.87-rp	4-hydroxyindole	133.053	7.87	C8H7NO	#N/A	Metabolic pathways;Biosynthesis of secondary metabolites;Other	rp
FAUX	133.95375@1.081-rp	#N/A	133.954	1.081	#N/A	#N/A	#N/A	rp
FAUX	133.95381@0.962-rp	#N/A	133.954	0.962	#N/A	#N/A	#N/A	rp
FAUX	3-dehydrothreonicacid@1.18-rp	3-dehydrothreonicacid	134.022	1.18	C4H6O5	#N/A	Metabolic pathways;Biosynthesis of secondary metabolites;Microbial metabolism in diverse environments;Biosynthesis of plant secondary metabolites;Biosynthesis of phenylpropanoids;Biosynthesis of plant hormones;Biosynthesis of alkaloids derived from shikimate pathway;Carbon metabolism;Other	rp
FAUX	134.02271@1.488-rp	#N/A	134.023	1.488	C5H2N4O	#N/A	#N/A	rp
FAUX	134.02279@2.623-rp	#N/A	134.023	2.623	C5H2N4O	#N/A	#N/A	rp
FAUX	134.03842@1.185-rp	#N/A	134.038	1.185	#N/A	#N/A	#N/A	rp
FAUX	135.00673@2.389-rp	#N/A	135.007	2.389	C5HN3O2	#N/A	#N/A	rp
FAUX	135.00676@3.248-rp	#N/A	135.007	3.248	C5HN3O2	#N/A	#N/A	rp
FAUX	135.03201@4.402-rp	#N/A	135.032	4.402	C7H5NO2	#N/A	#N/A	rp
FAUX	4-hydroxythreonine@1.574-rp	4-hydroxythreonine	135.054	1.574	C4H9NO4	#N/A	Other	rp
FAUX	Adenine@3.387-rp	Adenine	135.054	3.387	C5H5N5	185	Metabolic pathways;Purine metabolism;Other	rp
FAUX	Adenine@1.564-rp	Adenine	135.054	1.564	C5H5N5	185	Metabolic pathways;Purine metabolism;Other	rp
FAUX	Adenine@2.152-rp	Adenine	135.054	2.152	C5H5N5	185	Metabolic pathways;Purine metabolism;Other	rp
FAUX	Adenine@6.231-rp	Adenine	135.055	6.231	C5H5N5	185	Metabolic pathways;Purine metabolism;Other	rp
FAUX	Adenine@7.342-rp	Adenine	135.055	7.342	C5H5N5	185	Metabolic pathways;Purine metabolism;Other	rp
FAUX	Adenine@4.298-rp	Adenine	135.055	4.298	C5H5N5	185	Metabolic pathways;Purine metabolism;Other	rp
FAUX	2-phenylacetamide@1.458-rp	2-phenylacetamide	135.068	1.458	C8H9NO	#N/A	Metabolic pathways;Biosynthesis of secondary metabolites;Microbial metabolism in diverse environments;2-Oxocarboxylic acid metabolism;Phenylalanine metabolism;Other	rp
FAUX	2-phenylacetamide@5.977-rp	2-phenylacetamide	135.068	5.977	C8H9NO	#N/A	Metabolic pathways;Biosynthesis of secondary metabolites;Microbial metabolism in diverse environments;2-Oxocarboxylic acid metabolism;Phenylalanine metabolism;Other	rp
FAUX	135.90195@11.826-rp	#N/A	135.902	11.826	#N/A	#N/A	#N/A	rp
FAUX	135.93294@0.936-rp	#N/A	135.933	0.936	#N/A	#N/A	#N/A	rp
FAUX	136.02218@0.835-rp	#N/A	136.022	0.835	C3H9N2PS	#N/A	#N/A	rp
FAUX	Erythronicacid@1.067-rp	Erythronicacid	136.037	1.067	C4H8O5	#N/A	Metabolic pathways;Other	rp
FAUX	Hypoxanthine@2.457-rp	Hypoxanthine	136.038	2.457	C5H4N4O	#N/A	Metabolic pathways;Purine metabolism	rp
FAUX	Hypoxanthine@1.52-rp	Hypoxanthine	136.038	1.52	C5H4N4O	#N/A	Metabolic pathways;Purine metabolism	rp
FAUX	Hypoxanthine@2.389-rp	Hypoxanthine	136.038	2.389	C5H4N4O	#N/A	Metabolic pathways;Purine metabolism	rp
FAUX	Hypoxanthine@4.317-rp	Hypoxanthine	136.038	4.317	C5H4N4O	#N/A	Metabolic pathways;Purine metabolism	rp
FAUX	2-hydroxyacetophenone@4.364-rp	2-hydroxyacetophenone	136.053	4.364	C8H8O2	#N/A	Metabolic pathways;Biosynthesis of secondary metabolites;Microbial metabolism in diverse environments;Biosynthesis of plant secondary metabolites;Degradation of aromatic compounds;Biosynthesis of alkaloids derived from shikimate pathway;Phenylalanine metabolism;Other	rp
FAUX	1-methylnicotinamide@1.035-rp	1-methylnicotinamide	136.064	1.035	C7H8N2O	#N/A	#N/A	rp
FAUX	136.08118@2.443-rp	#N/A	136.081	2.443	#N/A	#N/A	#N/A	rp
FAUX	137.02235@2.322-rp	#N/A	137.022	2.322	C5H3N3O2	#N/A	#N/A	rp
FAUX	137.02239@2.446-rp	#N/A	137.022	2.446	C5H3N3O2	#N/A	#N/A	rp
FAUX	137.03548@2.426-rp	#N/A	137.035	2.426	C2H8N3O2P	#N/A	#N/A	rp
FAUX	137.04143@2.395-rp	#N/A	137.041	2.395	#N/A	#N/A	#N/A	rp
FAUX	2-pyridylaceticacid@1.189-rp	2-pyridylaceticacid	137.048	1.189	C7H7NO2	#N/A	Metabolic pathways;Biosynthesis of secondary metabolites;Microbial metabolism in diverse environments;Biosynthesis of plant secondary metabolites;Biosynthesis of amino acids;Degradation of aromatic compounds;Biosynthesis of phenylpropanoids;Biosynthesis of plant hormones;Biosynthesis of alkaloids derived from shikimate pathway;Other	rp
FAUX	2-pyridylaceticacid@6.488-rp	2-pyridylaceticacid	137.048	6.488	C7H7NO2	#N/A	Metabolic pathways;Biosynthesis of secondary metabolites;Microbial metabolism in diverse environments;Biosynthesis of plant secondary metabolites;Biosynthesis of amino acids;Degradation of aromatic compounds;Biosynthesis of phenylpropanoids;Biosynthesis of plant hormones;Biosynthesis of alkaloids derived from shikimate pathway;Other	rp
FAUX	2-aminonicotinicacid@1.792-rp	2-aminonicotinicacid	138.043	1.792	C6H6N2O2	#N/A	Metabolic pathways;Histidine metabolism	rp
FAUX	2-aminonicotinicacid@3.214-rp	2-aminonicotinicacid	138.043	3.214	C6H6N2O2	#N/A	Metabolic pathways;Histidine metabolism	rp
FAUX	2-aminonicotinicacid@3.431-rp	2-aminonicotinicacid	138.043	3.431	C6H6N2O2	#N/A	Metabolic pathways;Histidine metabolism	rp
FAUX	3,6-nonadienal@11.641-rp	3,6-nonadienal	138.105	11.641	C9H14O	#N/A	Biosynthesis of secondary metabolites;alpha-Linolenic acid metabolism	rp
FAUX	2-hydroxynicotinicacid@3.203-rp	2-hydroxynicotinicacid	139.027	3.203	C6H5NO3	#N/A	Metabolic pathways;Microbial metabolism in diverse environments;Other	rp
FAUX	139.06346@6.49-rp	#N/A	139.063	6.49	C7H9NO2	#N/A	#N/A	rp
FAUX	Acetylphosphate@1.069-rp	Acetylphosphate	139.987	1.069	C2H5O5P	#N/A	Metabolic pathways;Microbial metabolism in diverse environments;Carbon metabolism;Other	rp
FAUX	4-carboxymethylenebutenolide@1.229-rp	4-carboxymethylenebutenolide	140.011	1.229	C6H4O4	#N/A	Microbial metabolism in diverse environments;Other	rp
FAUX	140.04351@0.846-rp	#N/A	140.044	0.846	C2H8N2O5	#N/A	#N/A	rp
FAUX	140.04424@0.846-rp	#N/A	140.044	0.846	C3H4N6O	#N/A	#N/A	rp
FAUX	1-methylimidazoleaceticacid@1.176-rp	1-methylimidazoleaceticacid	140.058	1.176	C6H8N2O2	#N/A	Metabolic pathways;Histidine metabolism	rp
FAUX	141.02469@1.265-rp	#N/A	141.025	1.265	#N/A	#N/A	#N/A	rp
FAUX	141.02556@1.259-rp	#N/A	141.026	1.259	#N/A	#N/A	#N/A	rp
FAUX	141.0276@0.828-rp	#N/A	141.028	0.828	#N/A	#N/A	#N/A	rp
FAUX	2-aminomuconicacidsemialdehyde@1.713-rp	2-aminomuconicacidsemialdehyde	141.043	1.713	C6H7NO3	#N/A	Metabolic pathways;Microbial metabolism in diverse environments;Other	rp
FAUX	141.05781@3.074-rp	#N/A	141.058	3.074	C10H7N	#N/A	#N/A	rp
FAUX	141.94081@0.94-rp	#N/A	141.941	0.94	#N/A	#N/A	#N/A	rp
FAUX	142.01155@0.843-rp	#N/A	142.012	0.843	#N/A	#N/A	#N/A	rp
FAUX	142.02429@0.909-rp	#N/A	142.024	0.909	#N/A	#N/A	#N/A	rp
FAUX	142.02833@0.833-rp	#N/A	142.028	0.833	C7H2N4	#N/A	#N/A	rp
FAUX	142.02903@0.829-rp	#N/A	142.029	0.829	#N/A	#N/A	#N/A	rp
FAUX	142.06308@5.335-rp	#N/A	142.063	5.335	C7H10O3	#N/A	#N/A	rp
FAUX	Ectoine@1.15-rp	Ectoine	142.074	1.15	C6H10N2O2	670	Metabolic pathways;Microbial metabolism in diverse environments;Other	rp
FAUX	143.02512@0.829-rp	#N/A	143.025	0.829	C4H6N3OP	#N/A	#N/A	rp
FAUX	143.05813@1.05-rp	#N/A	143.058	1.05	C6H9NO3	#N/A	#N/A	rp
FAUX	143.05815@2.522-rp	#N/A	143.058	2.522	C6H9NO3	#N/A	#N/A	rp
FAUX	143.05817@4.51-rp	#N/A	143.058	4.51	C6H9NO3	#N/A	#N/A	rp
FAUX	1-naphthylamine@3.079-rp	1-naphthylamine	143.073	3.079	C10H9N	#N/A	Other	rp
FAUX	Homocycloleucine@1.232-rp	Homocycloleucine	143.094	1.232	C7H13NO2	1325	ABC transporters	rp
FAUX	144.00584@1.134-rp	#N/A	144.006	1.134	C5H4O5	#N/A	#N/A	rp
FAUX	144.00586@1.432-rp	#N/A	144.006	1.432	C5H4O5	#N/A	#N/A	rp
FAUX	2-methyleneglutaricacid@1.057-rp	2-methyleneglutaricacid	144.042	1.057	C6H8O4	85862	Microbial metabolism in diverse environments;Other	rp
FAUX	144.05326@1.001-rp	#N/A	144.053	1.001	C5H8N2O3	#N/A	#N/A	rp
FAUX	144.09392@10.569-rp	#N/A	144.094	10.569	C11H12	#N/A	#N/A	rp
FAUX	8-hydroxyquinoline@7.576-rp	8-hydroxyquinoline	145.053	7.576	C9H7NO	#N/A	#N/A	rp
FAUX	8-hydroxyquinoline@3.078-rp	8-hydroxyquinoline	145.053	3.078	C9H7NO	#N/A	#N/A	rp
FAUX	8-hydroxyquinoline@2.105-rp	8-hydroxyquinoline	145.053	2.105	C9H7NO	#N/A	#N/A	rp
FAUX	2-amino-5-oxohexanoicacid@1.043-rp	2-amino-5-oxohexanoicacid	145.074	1.043	C6H11NO3	#N/A	Metabolic pathways;Biosynthesis of secondary metabolites;Biosynthesis of plant secondary metabolites;Biosynthesis of amino acids;Other	rp
FAUX	2-amino-5-oxohexanoicacid@2.332-rp	2-amino-5-oxohexanoicacid	145.074	2.332	C6H11NO3	#N/A	Metabolic pathways;Biosynthesis of secondary metabolites;Biosynthesis of plant secondary metabolites;Biosynthesis of amino acids;Other	rp
FAUX	2-amino-5-oxohexanoicacid@1.676-rp	2-amino-5-oxohexanoicacid	145.074	1.676	C6H11NO3	#N/A	Metabolic pathways;Biosynthesis of secondary metabolites;Biosynthesis of plant secondary metabolites;Biosynthesis of amino acids;Other	rp
FAUX	4-guanidinobutanoicacid@1.19-rp	4-guanidinobutanoicacid	145.085	1.19	C5H11N3O2	#N/A	Metabolic pathways;Other	rp
FAUX	3-amino-4-methylhexanoicacid@1.066-rp	3-amino-4-methylhexanoicacid	145.11	1.066	C7H15NO2	#N/A	#N/A	rp
FAUX	1,4-dichlorobenzene@11.074-rp	1,4-dichlorobenzene	145.969	11.074	C6H4Cl2	#N/A	Metabolic pathways;Microbial metabolism in diverse environments;Degradation of aromatic compounds;Other	rp
FAUX	2-oxoglutaricacid@1.264-rp	2-oxoglutaricacid	146.022	1.264	C5H6O5	#N/A	Metabolic pathways;Biosynthesis of secondary metabolites;Microbial metabolism in diverse environments;Biosynthesis of plant secondary metabolites;Biosynthesis of amino acids;2-Oxocarboxylic acid metabolism;Biosynthesis of phenylpropanoids;Biosynthesis of plant hormones;Biosynthesis of alkaloids derived from shikimate pathway;Bile secretion;Carbon metabolism;Histidine metabolism;Other	rp
FAUX	146.02245@1.098-rp	#N/A	146.022	1.098	C6H2N4O	#N/A	#N/A	rp
FAUX	Chromone@7.544-rp	Chromone	146.037	7.544	C9H6O2	9866	Biosynthesis of secondary metabolites;Other	rp
FAUX	2,2-dimethylsuccinicacid@5.676-rp	2,2-dimethylsuccinicacid	146.058	5.676	C6H10O4	#N/A	Metabolic pathways;Biosynthesis of secondary metabolites;Microbial metabolism in diverse environments;Biosynthesis of amino acids;Degradation of aromatic compounds;2-Oxocarboxylic acid metabolism;Other	rp
FAUX	2,2-dimethylsuccinicacid@1.952-rp	2,2-dimethylsuccinicacid	146.058	1.952	C6H10O4	#N/A	Metabolic pathways;Biosynthesis of secondary metabolites;Microbial metabolism in diverse environments;Biosynthesis of amino acids;Degradation of aromatic compounds;2-Oxocarboxylic acid metabolism;Other	rp
FAUX	2,2-dimethylsuccinicacid@3.883-rp	2,2-dimethylsuccinicacid	146.058	3.883	C6H10O4	#N/A	Metabolic pathways;Biosynthesis of secondary metabolites;Microbial metabolism in diverse environments;Biosynthesis of amino acids;Degradation of aromatic compounds;2-Oxocarboxylic acid metabolism;Other	rp
FAUX	2,2-dimethylsuccinicacid@2.812-rp	2,2-dimethylsuccinicacid	146.058	2.812	C6H10O4	#N/A	Metabolic pathways;Biosynthesis of secondary metabolites;Microbial metabolism in diverse environments;Biosynthesis of amino acids;Degradation of aromatic compounds;2-Oxocarboxylic acid metabolism;Other	rp
FAUX	Alanylglycine@0.997-rp	Alanylglycine	146.069	0.997	C5H10N2O3	#N/A	Metabolic pathways;Microbial metabolism in diverse environments;Biosynthesis of plant secondary metabolites;Biosynthesis of amino acids;Purine metabolism;ABC transporters;Histidine metabolism;Other	rp
FAUX	146.09442@8.85-rp	#N/A	146.094	8.85	C7H14O3	#N/A	#N/A	rp
FAUX	3,5-diaminohexanoicacid@0.881-rp	3,5-diaminohexanoicacid	146.105	0.881	C6H14N2O2	#N/A	Metabolic pathways;Biosynthesis of secondary metabolites;Microbial metabolism in diverse environments;Biosynthesis of plant secondary metabolites;Biosynthesis of amino acids;2-Oxocarboxylic acid metabolism;ABC transporters;Other	rp
FAUX	146.99651@0.985-rp	#N/A	146.997	0.985	#N/A	#N/A	#N/A	rp
FAUX	Indole-5,6-quinone@1.806-rp	Indole-5,6-quinone	147.032	1.806	C8H5NO2	389600	Metabolic pathways;Other	rp
FAUX	147.0352@1.568-rp	#N/A	147.035	1.568	#N/A	#N/A	#N/A	rp
FAUX	2-oxo-4-hydroxy-5-aminovalericacid@1.01-rp	2-oxo-4-hydroxy-5-aminovalericacid	147.053	1.01	C5H9NO4	#N/A	Metabolic pathways;Biosynthesis of secondary metabolites;Microbial metabolism in diverse environments;Biosynthesis of plant secondary metabolites;Biosynthesis of amino acids;2-Oxocarboxylic acid metabolism;ABC transporters;Carbon metabolism;Histidine metabolism;Other	rp
FAUX	2-oxo-4-hydroxy-5-aminovalericacid@1.274-rp	2-oxo-4-hydroxy-5-aminovalericacid	147.053	1.274	C5H9NO4	#N/A	Metabolic pathways;Biosynthesis of secondary metabolites;Microbial metabolism in diverse environments;Biosynthesis of plant secondary metabolites;Biosynthesis of amino acids;2-Oxocarboxylic acid metabolism;ABC transporters;Carbon metabolism;Histidine metabolism;Other	rp
FAUX	N-hydroxyisoleucine@1.055-rp	N-hydroxyisoleucine	147.089	1.055	C6H13NO3	#N/A	Biosynthesis of secondary metabolites;Other	rp
FAUX	N-hydroxyisoleucine@1.307-rp	N-hydroxyisoleucine	147.089	1.307	C6H13NO3	#N/A	Biosynthesis of secondary metabolites;Other	rp
FAUX	2-dehydro-3-deoxyarabinonicacid@1.426-rp	2-dehydro-3-deoxyarabinonicacid	148.037	1.426	C5H8O5	#N/A	Metabolic pathways;Microbial metabolism in diverse environments;Biosynthesis of amino acids;2-Oxocarboxylic acid metabolism;Other	rp
FAUX	2-dehydro-3-deoxyarabinonicacid@1.04-rp	2-dehydro-3-deoxyarabinonicacid	148.037	1.04	C5H8O5	#N/A	Metabolic pathways;Microbial metabolism in diverse environments;Biosynthesis of amino acids;2-Oxocarboxylic acid metabolism;Other	rp
FAUX	3-hydroxy-1-indanone@1.904-rp	3-hydroxy-1-indanone	148.052	1.904	C9H8O2	#N/A	Metabolic pathways;Biosynthesis of secondary metabolites;Microbial metabolism in diverse environments;Biosynthesis of plant secondary metabolites;Degradation of aromatic compounds;Biosynthesis of phenylpropanoids;Biosynthesis of plant hormones;Biosynthesis of alkaloids derived from shikimate pathway;Phenylalanine metabolism;Ubiquinone and other terpenoid-quinone biosynthesis;Other	rp
FAUX	148.58995@0.845-rp	#N/A	148.59	0.845	#N/A	#N/A	#N/A	rp
FAUX	149.00643@0.977-rp	#N/A	149.006	0.977	C4H8NOPS	#N/A	#N/A	rp
FAUX	Methionine@1.207-rp	Methionine	149.051	1.207	C5H11NO2S	#N/A	Metabolic pathways;Biosynthesis of secondary metabolites;Biosynthesis of plant secondary metabolites;Biosynthesis of amino acids;2-Oxocarboxylic acid metabolism;ABC transporters;Biosynthesis of plant hormones;Other	rp
FAUX	N,N-dihydroxyvaline@1.013-rp	N,N-dihydroxyvaline	149.069	1.013	C5H11NO4	#N/A	Metabolic pathways;Biosynthesis of secondary metabolites;Other	rp
FAUX	Arabinose@1.073-rp	Arabinose	150.053	1.073	C5H10O5	59687	Metabolic pathways;ABC transporters;Other	rp
FAUX	3-methoxyacetophenone@10.518-rp	3-methoxyacetophenone	150.068	10.518	C9H10O2	#N/A	Metabolic pathways;Biosynthesis of secondary metabolites;Microbial metabolism in diverse environments;Degradation of aromatic compounds;Biosynthesis of phenylpropanoids;Biosynthesis of alkaloids derived from shikimate pathway;Phenylalanine metabolism;Other	rp
FAUX	150.0777@1.022-rp	#N/A	150.078	1.022	#N/A	#N/A	#N/A	rp
FAUX	150.07914@1.017-rp	#N/A	150.079	1.017	C8H10N2O	#N/A	#N/A	rp
FAUX	151.00171@1.765-rp	#N/A	151.002	1.765	C5HN3O3	#N/A	#N/A	rp
FAUX	Guanine@1.95-rp	Guanine	151.049	1.95	C5H5N5O	744	Metabolic pathways;Purine metabolism	rp
FAUX	Guanine@1.488-rp	Guanine	151.049	1.488	C5H5N5O	744	Metabolic pathways;Purine metabolism	rp
FAUX	Guanine@2.562-rp	Guanine	151.049	2.562	C5H5N5O	744	Metabolic pathways;Purine metabolism	rp
FAUX	2-amino-3-methylbenzoicacid@1.463-rp	2-amino-3-methylbenzoicacid	151.063	1.463	C8H9NO2	#N/A	Metabolic pathways;Biosynthesis of secondary metabolites;Microbial metabolism in diverse environments;2-Oxocarboxylic acid metabolism;Biosynthesis of alkaloids derived from shikimate pathway;Bile secretion;Other	rp
FAUX	Alloxanthine@2.084-rp	Alloxanthine	152.033	2.084	C5H4N4O2	#N/A	Metabolic pathways;Biosynthesis of secondary metabolites;Microbial metabolism in diverse environments;Biosynthesis of plant secondary metabolites;Purine metabolism;Other	rp
FAUX	Alloxanthine@2.394-rp	Alloxanthine	152.033	2.394	C5H4N4O2	#N/A	Metabolic pathways;Biosynthesis of secondary metabolites;Microbial metabolism in diverse environments;Biosynthesis of plant secondary metabolites;Purine metabolism;Other	rp
FAUX	Alloxanthine@3.248-rp	Alloxanthine	152.033	3.248	C5H4N4O2	#N/A	Metabolic pathways;Biosynthesis of secondary metabolites;Microbial metabolism in diverse environments;Biosynthesis of plant secondary metabolites;Purine metabolism;Other	rp
FAUX	2-amino-4-nitrotoluene@4.403-rp	2-amino-4-nitrotoluene	152.059	4.403	C7H8N2O2	#N/A	Metabolic pathways;Microbial metabolism in diverse environments;Other	rp
FAUX	2-amino-4-nitrotoluene@3.554-rp	2-amino-4-nitrotoluene	152.059	3.554	C7H8N2O2	#N/A	Metabolic pathways;Microbial metabolism in diverse environments;Other	rp
FAUX	152.55998@6.378-rp	#N/A	152.56	6.378	#N/A	#N/A	#N/A	rp
FAUX	153.01732@3.248-rp	#N/A	153.017	3.248	C5H3N3O3	#N/A	#N/A	rp
FAUX	153.01733@2.391-rp	#N/A	153.017	2.391	C5H3N3O3	#N/A	#N/A	rp
FAUX	153.01826@2.414-rp	#N/A	153.018	2.414	#N/A	#N/A	#N/A	rp
FAUX	3-hydroxy-2-methylpyridine-5-carboxylicacid@4.397-rp	3-hydroxy-2-methylpyridine-5-carboxylicacid	153.043	4.397	C7H7NO3	#N/A	Metabolic pathways;Biosynthesis of secondary metabolites;Microbial metabolism in diverse environments;Other	rp
FAUX	3-hydroxy-2-methylpyridine-5-carboxylicacid@1.712-rp	3-hydroxy-2-methylpyridine-5-carboxylicacid	153.043	1.712	C7H7NO3	#N/A	Metabolic pathways;Biosynthesis of secondary metabolites;Microbial metabolism in diverse environments;Other	rp
FAUX	153.05567@1.105-rp	#N/A	153.056	1.105	C5H12ClNO2	#N/A	Other	rp
FAUX	FAPy-adenine@2.151-rp	FAPy-adenine	153.065	2.151	C5H7N5O	#N/A	#N/A	rp
FAUX	Propionylphosphate@1.068-rp	Propionylphosphate	154.003	1.068	C3H7O5P	4445508	Metabolic pathways;Other	rp
FAUX	154.02433@2.199-rp	#N/A	154.024	2.199	C3H2N6O2	#N/A	#N/A	rp
FAUX	154.07175@0.907-rp	#N/A	154.072	0.907	C3H6N8	#N/A	#N/A	rp
FAUX	154.07404@2.637-rp	#N/A	154.074	2.637	C7H10N2O2	#N/A	#N/A	rp
FAUX	154.09943@9.853-rp	#N/A	154.099	9.853	C9H14O2	#N/A	#N/A	rp
FAUX	155.01938@0.986-rp	#N/A	155.019	0.986	C2HN7O2	#N/A	#N/A	rp
FAUX	Histidine@0.893-rp	Histidine	155.069	0.893	C6H9N3O2	#N/A	Metabolic pathways;Biosynthesis of secondary metabolites;Biosynthesis of plant secondary metabolites;Biosynthesis of amino acids;ABC transporters;Histidine metabolism;Other	rp
FAUX	Histidine@0.97-rp	Histidine	155.069	0.97	C6H9N3O2	#N/A	Metabolic pathways;Biosynthesis of secondary metabolites;Biosynthesis of plant secondary metabolites;Biosynthesis of amino acids;ABC transporters;Histidine metabolism;Other	rp
FAUX	155.93568@0.962-rp	#N/A	155.936	0.962	#N/A	#N/A	#N/A	rp
FAUX	155.95647@0.959-rp	#N/A	155.956	0.959	C2H6O2P2S	#N/A	#N/A	rp
FAUX	2,3-dihydro-2,3-dihydroxybenzoicacid@1.058-rp	2,3-dihydro-2,3-dihydroxybenzoicacid	156.042	1.058	C7H8O4	#N/A	Metabolic pathways;Biosynthesis of secondary metabolites;Microbial metabolism in diverse environments;Degradation of aromatic compounds;Other	rp
FAUX	4-imidazolone-5-propanoicacid@1.042-rp	4-imidazolone-5-propanoicacid	156.053	1.042	C6H8N2O3	#N/A	Metabolic pathways;Histidine metabolism	rp
FAUX	157.04868@1.038-rp	#N/A	157.049	1.038	C5H7N3O3	#N/A	#N/A	rp
FAUX	3-methylcrotonylglycine@4.092-rp	3-methylcrotonylglycine	157.074	4.092	C7H11NO3	#N/A	#N/A	rp
FAUX	157.91478@0.948-rp	#N/A	157.915	0.948	#N/A	#N/A	#N/A	rp
FAUX	157.99822@0.917-rp	#N/A	157.998	0.917	C2H7O6P	#N/A	#N/A	rp
FAUX	158.02047@2.316-rp	#N/A	158.02	2.316	#N/A	#N/A	#N/A	rp
FAUX	158.04298@0.82-rp	#N/A	158.043	0.82	#N/A	#N/A	Metabolic pathways;Microbial metabolism in diverse environments;Purine metabolism	rp
FAUX	Allantoin@1.111-rp	Allantoin	158.044	1.111	C4H6N4O3	199	Metabolic pathways;Microbial metabolism in diverse environments;Purine metabolism	rp
FAUX	5-hydroxyectoine@1.029-rp	5-hydroxyectoine	158.069	1.029	C6H10N2O3	#N/A	Metabolic pathways;Microbial metabolism in diverse environments;Other	rp
FAUX	5-hydroxyectoine@2.249-rp	5-hydroxyectoine	158.069	2.249	C6H10N2O3	#N/A	Metabolic pathways;Microbial metabolism in diverse environments;Other	rp
FAUX	159.03814@0.82-rp	#N/A	159.038	0.82	#N/A	#N/A	#N/A	rp
FAUX	6-methoxyquinoline@3.079-rp	6-methoxyquinoline	159.068	3.079	C10H9NO	#N/A	Metabolic pathways;Biosynthesis of secondary metabolites;Other	rp
FAUX	6-methoxyquinoline@1.885-rp	6-methoxyquinoline	159.068	1.885	C10H9NO	#N/A	Metabolic pathways;Biosynthesis of secondary metabolites;Other	rp
FAUX	3-dehydrocarnitine@1.04-rp	3-dehydrocarnitine	159.089	1.04	C7H13NO3	5360148	Metabolic pathways;Other	rp
FAUX	3-dehydrocarnitine@3.604-rp	3-dehydrocarnitine	159.09	3.604	C7H13NO3	5360148	Metabolic pathways;Other	rp
FAUX	3-dehydrocarnitine@3.917-rp	3-dehydrocarnitine	159.09	3.917	C7H13NO3	5360148	Metabolic pathways;Other	rp
FAUX	3-dehydrocarnitine@4.675-rp	3-dehydrocarnitine	159.09	4.675	C7H13NO3	5360148	Metabolic pathways;Other	rp
FAUX	159.12573@1.389-rp	#N/A	159.126	1.389	C8H17NO2	#N/A	#N/A	rp
FAUX	159.12575@1.221-rp	#N/A	159.126	1.221	C8H17NO2	#N/A	#N/A	rp
FAUX	160.02207@0.834-rp	#N/A	160.022	0.834	#N/A	#N/A	#N/A	rp
FAUX	2-formylglutaricacid@1.022-rp	2-formylglutaricacid	160.037	1.022	C6H8O5	110868	Metabolic pathways;Biosynthesis of secondary metabolites;Microbial metabolism in diverse environments;Biosynthesis of amino acids;Degradation of aromatic compounds;2-Oxocarboxylic acid metabolism;Other	rp
FAUX	2-formylglutaricacid@1.981-rp	2-formylglutaricacid	160.037	1.981	C6H8O5	110868	Metabolic pathways;Biosynthesis of secondary metabolites;Microbial metabolism in diverse environments;Biosynthesis of amino acids;Degradation of aromatic compounds;2-Oxocarboxylic acid metabolism;Other	rp
FAUX	2,2-dimethylglutaricacid@6.698-rp	2,2-dimethylglutaricacid	160.074	6.698	C7H12O4	#N/A	Metabolic pathways;Other	rp
FAUX	Anatabine@3.078-rp	Anatabine	160.1	3.078	C10H12N2	229558	Metabolic pathways;Biosynthesis of secondary metabolites;Microbial metabolism in diverse environments;Biosynthesis of plant secondary metabolites;Biosynthesis of alkaloids derived from shikimate pathway;Other	rp
FAUX	N6-methyllysine@0.893-rp	N6-methyllysine	160.121	0.893	C7H16N2O2	#N/A	#N/A	rp
FAUX	161.01123@1.275-rp	#N/A	161.011	1.275	C8H3NO3	#N/A	#N/A	rp
FAUX	161.01444@1.264-rp	#N/A	161.014	1.264	C5H7NO3S	#N/A	#N/A	rp
FAUX	2,4-quinolinediol@6.537-rp	2,4-quinolinediol	161.048	6.537	C9H7NO2	#N/A	Metabolic pathways;Biosynthesis of alkaloids derived from shikimate pathway;Other	rp
FAUX	S-trans-1-Propenyl-L-cysteine@1.677-rp	S-trans-1-Propenyl-L-cysteine	161.051	1.677	C6H11NO2S	#N/A	#N/A	rp
FAUX	2-aminoadipicacid@1.168-rp	2-aminoadipicacid	161.069	1.168	C6H11NO4	#N/A	Metabolic pathways;Biosynthesis of secondary metabolites;Microbial metabolism in diverse environments;Biosynthesis of amino acids;2-Oxocarboxylic acid metabolism;Other	rp
FAUX	2-aminoadipicacid@1.059-rp	2-aminoadipicacid	161.069	1.059	C6H11NO4	#N/A	Metabolic pathways;Biosynthesis of secondary metabolites;Microbial metabolism in diverse environments;Biosynthesis of amino acids;2-Oxocarboxylic acid metabolism;Other	rp
FAUX	2-aminoadipicacid@1.749-rp	2-aminoadipicacid	161.069	1.749	C6H11NO4	#N/A	Metabolic pathways;Biosynthesis of secondary metabolites;Microbial metabolism in diverse environments;Biosynthesis of amino acids;2-Oxocarboxylic acid metabolism;Other	rp
FAUX	Carnitine@1.019-rp	Carnitine	161.105	1.019	C7H15NO3	#N/A	Bile secretion;Other	rp
FAUX	162.01798@1.386-rp	#N/A	162.018	1.386	C6H2N4O2	#N/A	Other	rp
FAUX	162.01959@0.835-rp	#N/A	162.02	0.835	C4H7N2O3P	#N/A	#N/A	rp
FAUX	162.05012@2.113-rp	#N/A	162.05	2.113	C2H6N6O3	#N/A	#N/A	rp
FAUX	2,3-dimethylmalicacid@1.059-rp	2,3-dimethylmalicacid	162.053	1.059	C6H10O5	#N/A	Metabolic pathways;Biosynthesis of secondary metabolites;Microbial metabolism in diverse environments;Other	rp
FAUX	2,3-dimethylmalicacid@1.73-rp	2,3-dimethylmalicacid	162.053	1.73	C6H10O5	#N/A	Metabolic pathways;Biosynthesis of secondary metabolites;Microbial metabolism in diverse environments;Other	rp
FAUX	Glycylserine@0.998-rp	Glycylserine	162.064	0.998	C5H10N2O4	#N/A	#N/A	rp
FAUX	2-deoxystreptamine@0.879-rp	2-deoxystreptamine	162.1	0.879	C6H14N2O3	#N/A	Metabolic pathways;Biosynthesis of secondary metabolites;Microbial metabolism in diverse environments;Other	rp
FAUX	162.1045@12.958-rp	#N/A	162.105	12.958	C11H14O	#N/A	Metabolic pathways;Biosynthesis of secondary metabolites;Ubiquinone and other terpenoid-quinone biosynthesis	rp
FAUX	162.97043@0.982-rp	#N/A	162.97	0.982	C2H3N3O2P2	#N/A	#N/A	rp
FAUX	163.0008@0.963-rp	#N/A	163.001	0.963	#N/A	#N/A	#N/A	rp
FAUX	163.0494@2.747-rp	#N/A	163.049	2.747	C6H5N5O	#N/A	#N/A	rp
FAUX	163.04958@2.135-rp	#N/A	163.05	2.135	C6H5N5O	#N/A	#N/A	rp
FAUX	3-hydroxy-3-methyloxindole@10.93-rp	3-hydroxy-3-methyloxindole	163.064	10.93	C9H9NO2	133151	Metabolic pathways;Microbial metabolism in diverse environments;Other	rp
FAUX	163.99353@0.889-rp	#N/A	163.994	0.889	C8H4O2S	#N/A	#N/A	rp
FAUX	164.03208@1.42-rp	#N/A	164.032	1.42	C5H8O6	#N/A	#N/A	rp
FAUX	164.03212@1.055-rp	#N/A	164.032	1.055	C5H8O6	#N/A	#N/A	rp
FAUX	164.0435@0.828-rp	#N/A	164.043	0.828	C4H8N2O5	#N/A	#N/A	rp
FAUX	2-hydroxy-3-phenylpropenoicacid@1.457-rp	2-hydroxy-3-phenylpropenoicacid	164.047	1.457	C9H8O3	#N/A	Metabolic pathways;Biosynthesis of secondary metabolites;Microbial metabolism in diverse environments;Biosynthesis of plant secondary metabolites;Biosynthesis of amino acids;Degradation of aromatic compounds;2-Oxocarboxylic acid metabolism;Biosynthesis of phenylpropanoids;Phenylalanine metabolism;Ubiquinone and other terpenoid-quinone biosynthesis;Other	rp
FAUX	2-hydroxy-3-phenylpropenoicacid@3.936-rp	2-hydroxy-3-phenylpropenoicacid	164.047	3.936	C9H8O3	#N/A	Metabolic pathways;Biosynthesis of secondary metabolites;Microbial metabolism in diverse environments;Biosynthesis of plant secondary metabolites;Biosynthesis of amino acids;Degradation of aromatic compounds;2-Oxocarboxylic acid metabolism;Biosynthesis of phenylpropanoids;Phenylalanine metabolism;Ubiquinone and other terpenoid-quinone biosynthesis;Other	rp
FAUX	2-hydroxy-3-phenylpropenoicacid@4.367-rp	2-hydroxy-3-phenylpropenoicacid	164.047	4.367	C9H8O3	#N/A	Metabolic pathways;Biosynthesis of secondary metabolites;Microbial metabolism in diverse environments;Biosynthesis of plant secondary metabolites;Biosynthesis of amino acids;Degradation of aromatic compounds;2-Oxocarboxylic acid metabolism;Biosynthesis of phenylpropanoids;Phenylalanine metabolism;Ubiquinone and other terpenoid-quinone biosynthesis;Other	rp
FAUX	1,5-anhydroglucitol@1.163-rp	1,5-anhydroglucitol	164.068	1.163	C6H12O5	58485	Metabolic pathways;Microbial metabolism in diverse environments;ABC transporters;Other	rp
FAUX	2-methoxy-5-prop-1-enylphenol@13.451-rp	2-methoxy-5-prop-1-enylphenol	164.084	13.451	C10H12O2	#N/A	Metabolic pathways;Microbial metabolism in diverse environments;Degradation of aromatic compounds;Other	rp
FAUX	164.12015@11.615-rp	#N/A	164.12	11.615	C11H16O	#N/A	#N/A	rp
FAUX	4-pyridoxolactone@6.488-rp	4-pyridoxolactone	165.043	6.488	C8H7NO3	#N/A	Metabolic pathways;Biosynthesis of secondary metabolites;Microbial metabolism in diverse environments;Other	rp
FAUX	165.04563@1.03-rp	#N/A	165.046	1.03	C7H8N3P	#N/A	Other	rp
FAUX	165.04707@1.041-rp	#N/A	165.047	1.041	#N/A	#N/A	#N/A	rp
FAUX	7-methylguanine@2.748-rp	7-methylguanine	165.065	2.748	C6H7N5O	#N/A	#N/A	rp
FAUX	4-hydroxypyridinyl-butanone@1.904-rp	4-hydroxypyridinyl-butanone	165.079	1.904	C9H11NO2	#N/A	Metabolic pathways;Biosynthesis of secondary metabolites;Biosynthesis of plant secondary metabolites;Biosynthesis of amino acids;2-Oxocarboxylic acid metabolism;ABC transporters;Biosynthesis of phenylpropanoids;Biosynthesis of plant hormones;Biosynthesis of alkaloids derived from shikimate pathway;Phenylalanine metabolism;Other	rp
FAUX	1,3-benzodioxole-5-carboxylicacid@5.344-rp	1,3-benzodioxole-5-carboxylicacid	166.027	5.344	C8H6O4	#N/A	Metabolic pathways;Biosynthesis of secondary metabolites;Microbial metabolism in diverse environments;Degradation of aromatic compounds;ABC transporters;Other	rp
FAUX	Arabinonicacid@1.044-rp	Arabinonicacid	166.048	1.044	C5H10O6	#N/A	Metabolic pathways;Other	rp
FAUX	1-methylxanthine@8.555-rp	1-methylxanthine	166.048	8.555	C6H6N4O2	#N/A	Metabolic pathways;Biosynthesis of secondary metabolites;Microbial metabolism in diverse environments;Other	rp
FAUX	2-methoxy-2-phenylaceticacid@7.031-rp	2-methoxy-2-phenylaceticacid	166.063	7.031	C9H10O3	#N/A	Metabolic pathways;Biosynthesis of secondary metabolites;Microbial metabolism in diverse environments;Degradation of aromatic compounds;Phenylalanine metabolism;Other	rp
FAUX	2-methoxy-2-phenylaceticacid@8.169-rp	2-methoxy-2-phenylaceticacid	166.063	8.169	C9H10O3	#N/A	Metabolic pathways;Biosynthesis of secondary metabolites;Microbial metabolism in diverse environments;Degradation of aromatic compounds;Phenylalanine metabolism;Other	rp
FAUX	8-Oxogeranial@9.693-rp	8-Oxogeranial	166.099	9.693	C10H14O2	#N/A	Metabolic pathways;Biosynthesis of secondary metabolites;Other	rp
FAUX	8-Oxogeranial@7.035-rp	8-Oxogeranial	166.1	7.035	C10H14O2	#N/A	Metabolic pathways;Biosynthesis of secondary metabolites;Other	rp
FAUX	8-Oxogeranial@6.623-rp	8-Oxogeranial	166.1	6.623	C10H14O2	#N/A	Metabolic pathways;Biosynthesis of secondary metabolites;Other	rp
FAUX	167.02522@1.386-rp	#N/A	167.025	1.386	C4H9NO4S	#N/A	#N/A	rp
FAUX	167.02525@1.251-rp	#N/A	167.025	1.251	C4H9NO4S	#N/A	#N/A	rp
FAUX	3-methoxyanthranilicacid@1.429-rp	3-methoxyanthranilicacid	167.058	1.429	C8H9NO3	224233	Metabolic pathways;Biosynthesis of secondary metabolites;Microbial metabolism in diverse environments;Other	rp
FAUX	167.98269@1.12-rp	#N/A	167.983	1.12	C4H5ClO5	#N/A	Metabolic pathways;Biosynthesis of secondary metabolites;Microbial metabolism in diverse environments;Biosynthesis of plant secondary metabolites;Biosynthesis of amino acids;Biosynthesis of phenylpropanoids;Biosynthesis of plant hormones;Biosynthesis of alkaloids derived from shikimate pathway;Carbon metabolism;Other	rp
FAUX	Urate@4.531-rp	Urate	168.028	4.531	C5H4N4O3	#N/A	Metabolic pathways;Microbial metabolism in diverse environments;Purine metabolism;Bile secretion	rp
FAUX	Uricacid@1.765-rp	Uricacid	168.028	1.765	C5H4N4O3	#N/A	Metabolic pathways;Microbial metabolism in diverse environments;Purine metabolism;Bile secretion	rp
FAUX	168.02839@2.392-rp	#N/A	168.028	2.392	C5H14P2S	#N/A	Metabolic pathways;Microbial metabolism in diverse environments;Purine metabolism;Bile secretion	rp
FAUX	168.08737@0.908-rp	#N/A	168.087	0.908	C4H8N8	#N/A	#N/A	rp
FAUX	1-hydroxy-2-oxolimonene@9.435-rp	1-hydroxy-2-oxolimonene	168.115	9.435	C10H16O2	#N/A	Metabolic pathways;Biosynthesis of secondary metabolites;Degradation of aromatic compounds;Other	rp
FAUX	168.1516@14.796-rp	#N/A	168.152	14.796	C11H20O	#N/A	#N/A	rp
FAUX	ThiobenzamideS-dioxide@1.259-rp	ThiobenzamideS-dioxide	169.02	1.259	C7H7NO2S	#N/A	Microbial metabolism in diverse environments;Other	rp
FAUX	Phosphodimethylethanolamine@1.006-rp	Phosphodimethylethanolamine	169.051	1.006	C4H12NO4P	#N/A	Other	rp
FAUX	1-methylhistidine@0.988-rp	1-methylhistidine	169.085	0.988	C7H11N3O2	#N/A	Metabolic pathways;Histidine metabolism	rp
FAUX	169.95135@0.972-rp	#N/A	169.951	0.972	#N/A	#N/A	#N/A	rp
FAUX	Dihydroxyacetonephosphate@1.065-rp	Dihydroxyacetonephosphate	169.998	1.065	C3H7O6P	648	Metabolic pathways;Biosynthesis of secondary metabolites;Microbial metabolism in diverse environments;Biosynthesis of plant secondary metabolites;Biosynthesis of amino acids;Biosynthesis of phenylpropanoids;Biosynthesis of plant hormones;Biosynthesis of alkaloids derived from shikimate pathway;Carbon metabolism;Other	rp
FAUX	170.04571@0.926-rp	#N/A	170.046	0.926	C3H11N2O4P	#N/A	#N/A	rp
FAUX	170.06899@1.107-rp	#N/A	170.069	1.107	C7H10N2O3	#N/A	#N/A	rp
FAUX	3,7-dimethylocta-1,6-dienediol@9.612-rp	3,7-dimethylocta-1,6-dienediol	170.131	9.612	C10H18O2	#N/A	Metabolic pathways;Biosynthesis of secondary metabolites;Biosynthesis of alkaloids derived from shikimate pathway;Other	rp
FAUX	171.02779@2.555-rp	#N/A	171.028	2.555	C5H5N3O4	#N/A	#N/A	rp
FAUX	171.03561@7.632-rp	#N/A	171.036	7.632	C7H9NO2S	#N/A	#N/A	rp
FAUX	Tetrahydrodipicolinicacid@1.451-rp	Tetrahydrodipicolinicacid	171.053	1.451	C7H9NO4	#N/A	Metabolic pathways;Biosynthesis of secondary metabolites;Microbial metabolism in diverse environments;Biosynthesis of amino acids;Other	rp
FAUX	Tetrahydrodipicolinicacid@1.677-rp	Tetrahydrodipicolinicacid	171.053	1.677	C7H9NO4	#N/A	Metabolic pathways;Biosynthesis of secondary metabolites;Microbial metabolism in diverse environments;Biosynthesis of amino acids;Other	rp
FAUX	171.06417@1.007-rp	#N/A	171.064	1.007	C6H9N3O3	#N/A	#N/A	rp
FAUX	171.08945@2.118-rp	#N/A	171.089	2.118	C8H13NO3	#N/A	Other	rp
FAUX	171.51228@1.007-rp	#N/A	171.512	1.007	#N/A	#N/A	#N/A	rp
FAUX	171.90971@0.964-rp	#N/A	171.91	0.964	#N/A	#N/A	#N/A	rp
FAUX	171.94861@12.78-rp	#N/A	171.949	12.78	C7H2Cl2O	#N/A	#N/A	rp
FAUX	Glycerol-2-phosphate@1.062-rp	Glycerol-2-phosphate	172.014	1.062	C3H9O6P	#N/A	Metabolic pathways;Biosynthesis of secondary metabolites;ABC transporters;Other	rp
FAUX	172.03519@1.028-rp	#N/A	172.035	1.028	C3H4N6O3	#N/A	#N/A	rp
FAUX	172.03691@1.027-rp	#N/A	172.037	1.027	C2H5N8P	#N/A	Metabolic pathways;Biosynthesis of secondary metabolites;Microbial metabolism in diverse environments;Biosynthesis of plant secondary metabolites;Biosynthesis of amino acids;Degradation of aromatic compounds;Biosynthesis of phenylpropanoids;Biosynthesis of alkaloids derived from shikimate pathway;Other	rp
FAUX	172.05601@10.002-rp	#N/A	172.056	10.002	C8H12O2S	#N/A	#N/A	rp
FAUX	Glycylproline@1.431-rp	Glycylproline	172.084	1.431	C7H12N2O3	#N/A	#N/A	rp
FAUX	Glycylproline@1.094-rp	Glycylproline	172.085	1.094	C7H12N2O3	#N/A	#N/A	rp
FAUX	4-aminobenzenesulfonicacid@4.008-rp	4-aminobenzenesulfonicacid	173.015	4.008	C6H7NO3S	#N/A	Microbial metabolism in diverse environments;Other	rp
FAUX	173.03246@1.566-rp	#N/A	173.032	1.566	C6H7NO5	#N/A	#N/A	rp
FAUX	Hexanoylglycine@7.697-rp	Hexanoylglycine	173.105	7.697	C8H15NO3	#N/A	Other	rp
FAUX	Hexanoylglycine@7.079-rp	Hexanoylglycine	173.105	7.079	C8H15NO3	#N/A	Other	rp
FAUX	Hexanoylglycine@7.386-rp	Hexanoylglycine	173.106	7.386	C8H15NO3	#N/A	Other	rp
FAUX	173.88872@0.948-rp	#N/A	173.889	0.948	#N/A	#N/A	#N/A	rp
FAUX	Phenolsulficacid@3.539-rp	Phenolsulficacid	173.999	3.539	C6H6O4S	#N/A	#N/A	rp
FAUX	cis-Aconiticacid@1.146-rp	cis-Aconiticacid	174.016	1.146	C6H6O6	#N/A	Metabolic pathways;Biosynthesis of secondary metabolites;Microbial metabolism in diverse environments;Biosynthesis of plant secondary metabolites;2-Oxocarboxylic acid metabolism;Biosynthesis of phenylpropanoids;Biosynthesis of plant hormones;Biosynthesis of alkaloids derived from shikimate pathway;Other	rp
FAUX	cis-Aconiticacid@1.433-rp	cis-Aconiticacid	174.016	1.433	C6H6O6	#N/A	Metabolic pathways;Biosynthesis of secondary metabolites;Microbial metabolism in diverse environments;Biosynthesis of plant secondary metabolites;2-Oxocarboxylic acid metabolism;Biosynthesis of phenylpropanoids;Biosynthesis of plant hormones;Biosynthesis of alkaloids derived from shikimate pathway;Other	rp
FAUX	174.0639@1.056-rp	#N/A	174.064	1.056	C8H15PS	#N/A	Metabolic pathways;Histidine metabolism	rp
FAUX	174.07511@1.024-rp	#N/A	174.075	1.024	C5H10N4O3	#N/A	#N/A	rp
FAUX	174.07601@1.021-rp	#N/A	174.076	1.021	C5H10N4O3	#N/A	#N/A	rp
FAUX	N-acetylornithine@1.152-rp	N-acetylornithine	174.1	1.152	C7H14N2O3	#N/A	Metabolic pathways;Biosynthesis of secondary metabolites;Biosynthesis of amino acids;2-Oxocarboxylic acid metabolism;Other	rp
FAUX	175.03014@1.583-rp	#N/A	175.03	1.583	C6H9NO3S	#N/A	#N/A	rp
FAUX	N-acetylasparticacid@1.438-rp	N-acetylasparticacid	175.048	1.438	C6H9NO5	#N/A	Metabolic pathways;Histidine metabolism;Other	rp
FAUX	Guanidinosuccinicacid@1.048-rp	Guanidinosuccinicacid	175.059	1.048	C5H9N3O4	#N/A	#N/A	rp
FAUX	175.06665@2.899-rp	#N/A	175.067	2.899	C7H13NO2S	#N/A	#N/A	rp
FAUX	Citrulline@1.025-rp	Citrulline	175.095	1.025	C6H13N3O3	#N/A	Metabolic pathways;Biosynthesis of secondary metabolites;Biosynthesis of amino acids;Other	rp
FAUX	175.12064@1.165-rp	#N/A	175.121	1.165	C8H17NO3	#N/A	#N/A	rp
FAUX	2-hydroxy-3-oxoadipicacid@1.224-rp	2-hydroxy-3-oxoadipicacid	176.032	1.224	C6H8O6	8214596	Metabolic pathways;Biosynthesis of secondary metabolites;Microbial metabolism in diverse environments;Other	rp
FAUX	176.05694@1.577-rp	#N/A	176.057	1.577	C3H9N6OP	#N/A	#N/A	rp
FAUX	176.07946@1.01-rp	#N/A	176.079	1.01	C6H12N2O4	#N/A	Other	rp
FAUX	5,6,7,8-tetrahydro-2-naphthoicacid@17.749-rp	5,6,7,8-tetrahydro-2-naphthoicacid	176.084	17.749	C11H12O2	#N/A	Microbial metabolism in diverse environments;Degradation of aromatic compounds;Other	rp
FAUX	177.0515@0.936-rp	#N/A	177.052	0.936	#N/A	#N/A	#N/A	rp
FAUX	177.06494@2.112-rp	#N/A	177.065	2.112	C7H7N5O	#N/A	#N/A	rp
FAUX	177.06499@3.383-rp	#N/A	177.065	3.383	C7H7N5O	#N/A	#N/A	rp
FAUX	177.09977@1.014-rp	#N/A	177.1	1.014	C7H15NO4	#N/A	#N/A	rp
FAUX	Pyrophosphate@1.077-rp	Pyrophosphate	177.943	1.077	H4O7P2	#N/A	Other	rp
FAUX	177.98849@0.81-rp	#N/A	177.988	0.81	C4H8N2P2S	#N/A	#N/A	rp
FAUX	178.03266@0.821-rp	#N/A	178.033	0.821	#N/A	#N/A	#N/A	rp
FAUX	Cysteinylglycine@1.253-rp	Cysteinylglycine	178.041	1.253	C5H10N2O3S	#N/A	Metabolic pathways;Other	rp
FAUX	Cysteinylglycine@2.55-rp	Cysteinylglycine	178.041	2.55	C5H10N2O3S	#N/A	Metabolic pathways;Other	rp
FAUX	1-keto-inositol@1.023-rp	1-keto-inositol	178.048	1.023	C6H10O6	#N/A	Metabolic pathways;Biosynthesis of secondary metabolites;Microbial metabolism in diverse environments;Carbon metabolism;Other	rp
FAUX	1,2-dihydroxy-3,4-epoxytetrahydronaphthalene@6.192-rp	1,2-dihydroxy-3,4-epoxytetrahydronaphthalene	178.063	6.192	C10H10O3	#N/A	Metabolic pathways;Biosynthesis of secondary metabolites;2-Oxocarboxylic acid metabolism;Biosynthesis of phenylpropanoids;Other	rp
FAUX	S-carboxymethylcysteine@1.517-rp	S-carboxymethylcysteine	179.025	1.517	C5H9NO4S	#N/A	#N/A	rp
FAUX	Isoxanthopterin@3.162-rp	Isoxanthopterin	179.044	3.162	C6H5N5O2	#N/A	#N/A	rp
FAUX	3-succinoylpyridine@5.963-rp	3-succinoylpyridine	179.058	5.963	C9H9NO3	#N/A	Metabolic pathways;Biosynthesis of secondary metabolites;Microbial metabolism in diverse environments;Biosynthesis of alkaloids derived from shikimate pathway;Phenylalanine metabolism;Other	rp
FAUX	7-aminomethyl-7-carbaguanine@5.635-rp	7-aminomethyl-7-carbaguanine	179.081	5.635	C7H9N5O	#N/A	Metabolic pathways;Other	rp
FAUX	179.89669@0.938-rp	#N/A	179.897	0.938	#N/A	#N/A	#N/A	rp
FAUX	179.95811@0.808-rp	#N/A	179.958	0.808	C3HClN2O5	#N/A	#N/A	rp
FAUX	179.97091@0.926-rp	#N/A	179.971	0.926	C8H4OS2	#N/A	#N/A	rp
FAUX	179.98022@0.936-rp	#N/A	179.98	0.936	#N/A	#N/A	#N/A	rp
FAUX	179.98025@0.978-rp	#N/A	179.98	0.978	#N/A	#N/A	#N/A	rp
FAUX	180.03023@0.832-rp	#N/A	180.03	0.832	C4H9N2O4P	#N/A	#N/A	rp
FAUX	9-fluorenone@12.862-rp	9-fluorenone	180.058	12.862	C13H8O	#N/A	Metabolic pathways;Microbial metabolism in diverse environments;Other	rp
FAUX	Allose@1.019-rp	Allose	180.064	1.019	C6H12O6	#N/A	Metabolic pathways;Biosynthesis of secondary metabolites;Microbial metabolism in diverse environments;Biosynthesis of plant secondary metabolites;ABC transporters;Biosynthesis of phenylpropanoids;Biosynthesis of plant hormones;Biosynthesis of alkaloids derived from shikimate pathway;Bile secretion;Carbon metabolism;Other	rp
FAUX	Coniferylalcohol@12.707-rp	Coniferylalcohol	180.079	12.707	C10H12O3	#N/A	Metabolic pathways;Biosynthesis of secondary metabolites;Biosynthesis of phenylpropanoids;Other	rp
FAUX	180.11502@12.862-rp	#N/A	180.115	12.862	C11H16O2	#N/A	#N/A	rp
FAUX	180.11517@12.133-rp	#N/A	180.115	12.133	C11H16O2	#N/A	#N/A	rp
FAUX	181.05997@2.132-rp	#N/A	181.06	2.132	C6H7N5O2	#N/A	Other	rp
FAUX	Beta-tyrosine@1.903-rp	Beta-tyrosine	181.074	1.903	C9H11NO3	#N/A	Metabolic pathways;Biosynthesis of secondary metabolites;Biosynthesis of plant secondary metabolites;Biosynthesis of amino acids;2-Oxocarboxylic acid metabolism;Biosynthesis of alkaloids derived from shikimate pathway;Phenylalanine metabolism;Ubiquinone and other terpenoid-quinone biosynthesis;Other	rp
FAUX	Beta-tyrosine@1.464-rp	Beta-tyrosine	181.074	1.464	C9H11NO3	#N/A	Metabolic pathways;Biosynthesis of secondary metabolites;Biosynthesis of plant secondary metabolites;Biosynthesis of amino acids;2-Oxocarboxylic acid metabolism;Biosynthesis of alkaloids derived from shikimate pathway;Phenylalanine metabolism;Ubiquinone and other terpenoid-quinone biosynthesis;Other	rp
FAUX	181.11849@12.968-rp	#N/A	181.118	12.968	#N/A	#N/A	#N/A	rp
FAUX	181.12295@14.114-rp	#N/A	181.123	14.114	#N/A	#N/A	#N/A	rp
FAUX	182.0041@0.887-rp	#N/A	182.004	0.887	#N/A	#N/A	#N/A	rp
FAUX	182.05404@0.834-rp	#N/A	182.054	0.834	C4H10N2O6	#N/A	#N/A	rp
FAUX	3,4-dimethoxybenzoicacid@4.368-rp	3,4-dimethoxybenzoicacid	182.058	4.368	C9H10O4	#N/A	Metabolic pathways;Biosynthesis of secondary metabolites;Microbial metabolism in diverse environments;Degradation of aromatic compounds;Phenylalanine metabolism;Ubiquinone and other terpenoid-quinone biosynthesis;Other	rp
FAUX	Galactitol@1.028-rp	Galactitol	182.079	1.028	C6H14O6	#N/A	Metabolic pathways;ABC transporters;Other	rp
FAUX	Galactitol@1.028-rp_879	Galactitol	182.079	1.028	C6H14O6	#N/A	Metabolic pathways;ABC transporters;Other	rp
FAUX	Iridotrial@7.337-rp	Iridotrial	182.094	7.337	C10H14O3	15561147	Metabolic pathways;Biosynthesis of secondary metabolites;Other	rp
FAUX	182.97347@0.972-rp	#N/A	182.973	0.972	C5HN3O3S	#N/A	#N/A	rp
FAUX	p-hydroxyphenylacetothiohydroximicacid@1.469-rp	p-hydroxyphenylacetothiohydroximicacid	183.036	1.469	C8H9NO2S	#N/A	2-Oxocarboxylic acid metabolism;Other	rp
FAUX	183.03807@0.831-rp	#N/A	183.038	0.831	#N/A	#N/A	#N/A	rp
FAUX	3,5-dihydroxyphenylglycine@1.709-rp	3,5-dihydroxyphenylglycine	183.053	1.709	C8H9NO4	8096190	Metabolic pathways;Biosynthesis of secondary metabolites;Microbial metabolism in diverse environments;Other	rp
FAUX	Cholinephosphate@1.013-rp	Cholinephosphate	183.066	1.013	C5H14NO4P	#N/A	#N/A	rp
FAUX	Adrenaline@3.012-rp	Adrenaline	183.09	3.012	C9H13NO3	#N/A	Metabolic pathways;Other	rp
FAUX	183.54733@3.384-rp	#N/A	183.547	3.384	#N/A	#N/A	#N/A	rp
FAUX	5-hydroxyisourate@2.391-rp	5-hydroxyisourate	184.023	2.391	C5H4N4O4	#N/A	Metabolic pathways;Microbial metabolism in diverse environments;Purine metabolism	rp
FAUX	5-hydroxyisourate@1.764-rp	5-hydroxyisourate	184.023	1.764	C5H4N4O4	#N/A	Metabolic pathways;Microbial metabolism in diverse environments;Purine metabolism	rp
FAUX	184.06138@0.93-rp	#N/A	184.061	0.93	C4H13N2O4P	#N/A	#N/A	rp
FAUX	184.08476@2.057-rp	#N/A	184.085	2.057	C8H12N2O3	#N/A	#N/A	rp
FAUX	184.09239@9.693-rp	#N/A	184.092	9.693	C10H16OS	#N/A	#N/A	rp
FAUX	184.14638@12.583-rp	#N/A	184.146	12.583	C11H20O2	#N/A	#N/A	rp
FAUX	184.14647@15.781-rp	#N/A	184.146	15.781	C11H20O2	#N/A	#N/A	rp
FAUX	184.98275@0.953-rp	#N/A	184.983	0.953	#N/A	#N/A	#N/A	rp
FAUX	185.04686@1.074-rp	#N/A	185.047	1.074	C5H8N5OP	#N/A	#N/A	rp
FAUX	185.06873@1.569-rp	#N/A	185.069	1.569	C8H11NO4	#N/A	#N/A	rp
FAUX	185.06878@1.087-rp	#N/A	185.069	1.087	C8H11NO4	#N/A	#N/A	rp
FAUX	185.09847@1.219-rp	#N/A	185.098	1.219	C8H15N3S	#N/A	#N/A	rp
FAUX	185.98803@0.918-rp	#N/A	185.988	0.918	#N/A	#N/A	#N/A	rp
FAUX	2-phosphoglycericacid@1.113-rp	2-phosphoglycericacid	185.993	1.113	C3H7O7P	#N/A	Metabolic pathways;Biosynthesis of secondary metabolites;Microbial metabolism in diverse environments;Biosynthesis of plant secondary metabolites;Biosynthesis of amino acids;Biosynthesis of phenylpropanoids;Biosynthesis of plant hormones;Biosynthesis of alkaloids derived from shikimate pathway;Carbon metabolism;Other	rp
FAUX	186.02945@1.064-rp	#N/A	186.029	1.064	C4H11O6P	#N/A	#N/A	rp
FAUX	186.06383@1.015-rp	#N/A	186.064	1.015	C7H10N2O4	#N/A	#N/A	rp
FAUX	186.0715@8.349-rp	#N/A	186.071	8.349	C9H14O2S	#N/A	#N/A	rp
FAUX	2-carboxycyclohexylaceticacid@4.974-rp	2-carboxycyclohexylaceticacid	186.089	4.974	C9H14O4	#N/A	Microbial metabolism in diverse environments;Other	rp
FAUX	186.10022@1.086-rp	#N/A	186.1	1.086	C8H14N2O3	#N/A	#N/A	rp
FAUX	6-hydroxy-5-isopropenyl-2-methylhexanoicacid@9.438-rp	6-hydroxy-5-isopropenyl-2-methylhexanoicacid	186.126	9.438	C10H18O3	#N/A	Degradation of aromatic compounds;Other	rp
FAUX	2-acetamidomethylenesuccinicacid@1.037-rp	2-acetamidomethylenesuccinicacid	187.048	1.037	C7H9NO5	#N/A	Metabolic pathways;Biosynthesis of secondary metabolites;Microbial metabolism in diverse environments;Biosynthesis of amino acids;Other	rp
FAUX	187.06084@1.905-rp	#N/A	187.061	1.905	C7H5N7	#N/A	#N/A	rp
FAUX	Indole-3-acrylicacid@3.079-rp	Indole-3-acrylicacid	187.063	3.079	C11H9NO2	#N/A	Microbial metabolism in diverse environments;Other	rp
FAUX	Amino-oxononanoate@9.393-rp	Amino-oxononanoate	187.121	9.393	C9H17NO3	#N/A	Metabolic pathways;Other	rp
FAUX	187.15718@1.981-rp	#N/A	187.157	1.981	C10H21NO2	#N/A	#N/A	rp
FAUX	188.00867@1.252-rp	#N/A	188.009	1.252	C3H9O7P	#N/A	#N/A	rp
FAUX	2-sulfobenzylalcohol@7.239-rp	2-sulfobenzylalcohol	188.015	7.239	C7H8O4S	#N/A	Microbial metabolism in diverse environments;Degradation of aromatic compounds;Other	rp
FAUX	188.05087@6.552-rp	#N/A	188.051	6.552	C8H12O3S	#N/A	#N/A	rp
FAUX	N-acetylglutamine@1.453-rp	N-acetylglutamine	188.08	1.453	C7H12N2O4	#N/A	Biosynthesis of secondary metabolites;Other	rp
FAUX	Glycylleucine@1.669-rp	Glycylleucine	188.116	1.669	C8H16N2O3	#N/A	Metabolic pathways;Other	rp
FAUX	188.12019@10.117-rp	#N/A	188.12	10.117	C13H16O	#N/A	#N/A	rp
FAUX	188.12024@10.563-rp	#N/A	188.12	10.563	C13H16O	#N/A	#N/A	rp
FAUX	188.97481@9.143-rp	#N/A	188.975	9.143	C7H5Cl2NO	#N/A	#N/A	rp
FAUX	189.00976@1.871-rp	#N/A	189.01	1.871	C6H7NO4S	#N/A	#N/A	rp
FAUX	2-amino-6-oxoheptanedioicacid@1.678-rp	2-amino-6-oxoheptanedioicacid	189.064	1.678	C7H11NO5	#N/A	Metabolic pathways;Biosynthesis of secondary metabolites;Biosynthesis of amino acids;2-Oxocarboxylic acid metabolism;Other	rp
FAUX	2-methylindole-3-aceticacid@10.935-rp	2-methylindole-3-aceticacid	189.079	10.935	C11H11NO2	#N/A	#N/A	rp
FAUX	189.08239@6.027-rp	#N/A	189.082	6.027	C8H15NO2S	#N/A	#N/A	rp
FAUX	189.10034@2.119-rp	#N/A	189.1	2.119	C8H15NO4	#N/A	#N/A	rp
FAUX	189.10036@5.313-rp	#N/A	189.1	5.313	C8H15NO4	#N/A	#N/A	rp
FAUX	2,4-dichlorobenzoicacid@11.075-rp	2,4-dichlorobenzoicacid	189.959	11.075	C7H4Cl2O2	#N/A	Metabolic pathways;Microbial metabolism in diverse environments;Other	rp
FAUX	3-sulfocatechol@3.022-rp	3-sulfocatechol	189.994	3.022	C6H6O5S	#N/A	Microbial metabolism in diverse environments;Other	rp
FAUX	190.0029@1.026-rp	#N/A	190.003	1.026	C6H7O5P	#N/A	#N/A	rp
FAUX	2,4-dihydroxyheptenedioicacid@1.525-rp	2,4-dihydroxyheptenedioicacid	190.048	1.525	C7H10O6	#N/A	Metabolic pathways;Biosynthesis of secondary metabolites;Microbial metabolism in diverse environments;Biosynthesis of amino acids;Other	rp
FAUX	190.12089@6.644-rp	#N/A	190.121	6.644	C9H18O4	#N/A	#N/A	rp
FAUX	190.13582@17.325-rp	#N/A	190.136	17.325	C13H18O	#N/A	#N/A	rp
FAUX	190.13587@14.51-rp	#N/A	190.136	14.51	C13H18O	#N/A	#N/A	rp
FAUX	191.04269@1.038-rp	#N/A	191.043	1.038	C6H9NO6	#N/A	#N/A	rp
FAUX	5-hydroxyindoleaceticacid@7.574-rp	5-hydroxyindoleaceticacid	191.058	7.574	C10H9NO3	#N/A	Metabolic pathways;Other	rp
FAUX	5-hydroxyindoleaceticacid@2.107-rp	5-hydroxyindoleaceticacid	191.058	2.107	C10H9NO3	#N/A	Metabolic pathways;Other	rp
FAUX	N-acetylmethionine@4.514-rp	N-acetylmethionine	191.062	4.514	C7H13NO3S	#N/A	#N/A	rp
FAUX	N-acetylmethionine@1.385-rp	N-acetylmethionine	191.062	1.385	C7H13NO3S	#N/A	#N/A	rp
FAUX	191.95889@1.072-rp	#N/A	191.959	1.072	#N/A	#N/A	#N/A	rp
FAUX	2-dehydro-3-deoxy-d-glucaricacid@1.376-rp	2-dehydro-3-deoxy-d-glucaricacid	192.027	1.376	C6H8O7	#N/A	Metabolic pathways;Biosynthesis of secondary metabolites;Microbial metabolism in diverse environments;Biosynthesis of plant secondary metabolites;Biosynthesis of amino acids;2-Oxocarboxylic acid metabolism;Biosynthesis of phenylpropanoids;Biosynthesis of plant hormones;Biosynthesis of alkaloids derived from shikimate pathway;Carbon metabolism;Other	rp
FAUX	2-dehydro-3-deoxy-d-glucaricacid@1.063-rp	2-dehydro-3-deoxy-d-glucaricacid	192.027	1.063	C6H8O7	#N/A	Metabolic pathways;Biosynthesis of secondary metabolites;Microbial metabolism in diverse environments;Biosynthesis of plant secondary metabolites;Biosynthesis of amino acids;2-Oxocarboxylic acid metabolism;Biosynthesis of phenylpropanoids;Biosynthesis of plant hormones;Biosynthesis of alkaloids derived from shikimate pathway;Carbon metabolism;Other	rp
FAUX	192.07426@0.995-rp	#N/A	192.074	0.995	C6H12N2O5	#N/A	#N/A	rp
FAUX	192.14715@1.046-rp	#N/A	192.147	1.046	C8H20N2O3	#N/A	#N/A	rp
FAUX	192.15147@16.76-rp	#N/A	192.151	16.76	C13H20O	#N/A	#N/A	rp
FAUX	192.15148@18.243-rp	#N/A	192.151	18.243	C13H20O	#N/A	#N/A	rp
FAUX	193.02544@0.954-rp	#N/A	193.025	0.954	#N/A	#N/A	#N/A	rp
FAUX	2-methylhippuricacid@6.676-rp	2-methylhippuricacid	193.074	6.676	C10H11NO3	#N/A	Phenylalanine metabolism;Other	rp
FAUX	5-hydroxyconiferaldehyde@8.182-rp	5-hydroxyconiferaldehyde	194.058	8.182	C10H10O4	#N/A	Metabolic pathways;Biosynthesis of secondary metabolites;Biosynthesis of phenylpropanoids;Other	rp
FAUX	5-hydroxyconiferaldehyde@9.25-rp	5-hydroxyconiferaldehyde	194.058	9.25	C10H10O4	#N/A	Metabolic pathways;Biosynthesis of secondary metabolites;Biosynthesis of phenylpropanoids;Other	rp
FAUX	194.09179@9.853-rp	#N/A	194.092	9.853	C7H10N6O	#N/A	#N/A	rp
FAUX	194.13076@11.88-rp	#N/A	194.131	11.88	C12H18O2	#N/A	#N/A	rp
FAUX	194.13079@15.566-rp	#N/A	194.131	15.566	C12H18O2	#N/A	#N/A	rp
FAUX	195.04325@3.52-rp	#N/A	195.043	3.52	C11H5N3O	#N/A	#N/A	rp
FAUX	Amino-hydroxy-hydroxymethyl-dihydropteridine@2.617-rp	Amino-hydroxy-hydroxymethyl-dihydropteridine	195.076	2.617	C7H9N5O2	#N/A	Metabolic pathways;Other	rp
FAUX	195.87074@0.948-rp	#N/A	195.871	0.948	#N/A	#N/A	#N/A	rp
FAUX	195.95385@1.076-rp	#N/A	195.954	1.076	#N/A	#N/A	#N/A	rp
FAUX	195.99355@1.226-rp	#N/A	195.994	1.226	C7H4N2O3S	#N/A	#N/A	rp
FAUX	Altronicacid@1.028-rp	Altronicacid	196.058	1.028	C6H12O7	#N/A	Metabolic pathways;Biosynthesis of secondary metabolites;Microbial metabolism in diverse environments;Carbon metabolism;Other	rp
FAUX	197.03592@1.033-rp	#N/A	197.036	1.033	C5H11NO5S	#N/A	#N/A	rp
FAUX	197.05489@3.163-rp	#N/A	197.055	3.163	C6H7N5O3	#N/A	#N/A	rp
FAUX	L-Dopa@1.462-rp	L-Dopa	197.069	1.462	C9H11NO4	#N/A	Metabolic pathways;Biosynthesis of secondary metabolites;Biosynthesis of plant secondary metabolites;Biosynthesis of alkaloids derived from shikimate pathway;Other	rp
FAUX	197.07988@1.159-rp	#N/A	197.08	1.159	C8H11N3O3	#N/A	#N/A	rp
FAUX	197.08187@1.032-rp	#N/A	197.082	1.032	C6H16NO4P	#N/A	#N/A	rp
FAUX	197.08971@1.037-rp	#N/A	197.09	1.037	C6H15NO6	#N/A	#N/A	rp
FAUX	Clavaminicacid@1.312-rp	Clavaminicacid	198.064	1.312	C8H10N2O4	#N/A	Metabolic pathways;Biosynthesis of secondary metabolites;Other	rp
FAUX	1,2-dihydroxyfluorene@12.863-rp	1,2-dihydroxyfluorene	198.068	12.863	C13H10O2	#N/A	Microbial metabolism in diverse environments;Other	rp
FAUX	1,2-dihydroxyfluorene@13.895-rp	1,2-dihydroxyfluorene	198.068	13.895	C13H10O2	#N/A	Microbial metabolism in diverse environments;Other	rp
FAUX	198.12582@12.964-rp	#N/A	198.126	12.964	C11H18O3	#N/A	#N/A	rp
FAUX	Dodecenoicacid@16.818-rp	Dodecenoicacid	198.162	16.818	C12H22O2	4445856	Other	rp
FAUX	198.9474@0.976-rp	#N/A	198.947	0.976	C2H4ClN3O2P2	#N/A	#N/A	rp
FAUX	199.03328@0.919-rp	#N/A	199.033	0.919	C7H10N3PS	#N/A	#N/A	rp
FAUX	199.06112@1.022-rp	#N/A	199.061	1.022	C5H14NO5P	#N/A	#N/A	rp
FAUX	199.0684@1.385-rp	#N/A	199.068	1.385	C5H13NO7	#N/A	#N/A	rp
FAUX	199.08459@1.907-rp	#N/A	199.085	1.907	C9H13NO4	#N/A	Metabolic pathways;Biosynthesis of secondary metabolites;Other	rp
FAUX	199.22997@11.767-rp	#N/A	199.23	11.767	C13H29N	#N/A	#N/A	rp
FAUX	199.92563@0.948-rp	#N/A	199.926	0.948	#N/A	#N/A	#N/A	rp
FAUX	199.97807@1.998-rp	#N/A	199.978	1.998	C7H4O5S	#N/A	#N/A	rp
FAUX	Erythrose-4-phosphate@1.046-rp	Erythrose-4-phosphate	200.009	1.046	C4H9O7P	#N/A	Metabolic pathways;Biosynthesis of secondary metabolites;Microbial metabolism in diverse environments;Biosynthesis of plant secondary metabolites;Biosynthesis of amino acids;Biosynthesis of phenylpropanoids;Biosynthesis of plant hormones;Biosynthesis of alkaloids derived from shikimate pathway;Carbon metabolism;Other	rp
FAUX	200.01806@1.767-rp	#N/A	200.018	1.767	C5H4N4O5	#N/A	#N/A	rp
FAUX	200.0451@1.16-rp	#N/A	200.045	1.16	C5H13O6P	#N/A	#N/A	rp
FAUX	200.05825@1.821-rp	#N/A	200.058	1.821	C3H12N4O4S	#N/A	#N/A	rp
FAUX	200.07958@1.768-rp	#N/A	200.08	1.768	C8H12N2O4	#N/A	Metabolic pathways;Biosynthesis of secondary metabolites;Other	rp
FAUX	200.1053@7.371-rp	#N/A	200.105	7.371	C10H16O4	#N/A	#N/A	rp
FAUX	200.9265@0.965-rp	#N/A	200.927	0.965	#N/A	#N/A	#N/A	rp
FAUX	201.04863@0.824-rp	#N/A	201.049	0.824	C4H11NO8	#N/A	#N/A	rp
FAUX	201.06389@1.46-rp	#N/A	201.064	1.46	C3H8N9P	#N/A	#N/A	rp
FAUX	201.09994@1.764-rp	#N/A	201.1	1.764	C9H15NO4	#N/A	Metabolic pathways;Biosynthesis of secondary metabolites;Other	rp
FAUX	201.13683@11.402-rp	#N/A	201.137	11.402	C10H19NO3	#N/A	#N/A	rp
FAUX	201.96197@0.925-rp	#N/A	201.962	0.925	C4H2N4O2S2	#N/A	#N/A	rp
FAUX	202.03299@0.818-rp	#N/A	202.033	0.818	C4H10O9	#N/A	Metabolic pathways;Microbial metabolism in diverse environments;Purine metabolism	rp
FAUX	202.04516@0.988-rp	#N/A	202.045	0.988	#N/A	#N/A	#N/A	rp
FAUX	Diethyladipicacid@7.966-rp	Diethyladipicacid	202.121	7.966	C10H18O4	#N/A	#N/A	rp
FAUX	Dimethylarginine@1.028-rp	Dimethylarginine	202.142	1.028	C8H18N4O2	#N/A	#N/A	rp
FAUX	202.54283@5.939-rp	#N/A	202.543	5.939	#N/A	#N/A	#N/A	rp
FAUX	202.9642@1.28-rp	#N/A	202.964	1.28	C4H3N3O3P2	#N/A	#N/A	rp
FAUX	203.03287@0.843-rp	#N/A	203.033	0.843	C9H5N3O3	#N/A	#N/A	rp
FAUX	203.07913@1.066-rp	#N/A	203.079	1.066	C8H13NO5	#N/A	#N/A	rp
FAUX	203.07919@1.394-rp	#N/A	203.079	1.394	C8H13NO5	#N/A	#N/A	rp
FAUX	203.07955@2.475-rp	#N/A	203.08	2.475	C8H13NO5	#N/A	#N/A	rp
FAUX	203.07957@2.742-rp	#N/A	203.08	2.742	C8H13NO5	#N/A	#N/A	rp
FAUX	203.09813@8.345-rp	#N/A	203.098	8.345	C9H17NO2S	#N/A	#N/A	rp
FAUX	Acetylcarnitine@1.247-rp	Acetylcarnitine	203.116	1.247	C9H17NO4	21243783	#N/A	rp
FAUX	203.11601@7.548-rp	#N/A	203.116	7.548	C9H17NO4	#N/A	Biosynthesis of secondary metabolites;Other	rp
FAUX	203.12671@1.558-rp	#N/A	203.127	1.558	C8H17N3O3	#N/A	#N/A	rp
FAUX	204.03061@0.815-rp	#N/A	204.031	0.815	C6H9N2O4P	#N/A	#N/A	rp
FAUX	204.03689@0.812-rp	#N/A	204.037	0.812	#N/A	#N/A	#N/A	rp
FAUX	204.04542@1.523-rp	#N/A	204.045	1.523	C8H12O4S	#N/A	#N/A	rp
FAUX	204.04568@7.007-rp	#N/A	204.046	7.007	C8H12O4S	#N/A	#N/A	rp
FAUX	204.05635@1.243-rp	#N/A	204.056	1.243	#N/A	#N/A	#N/A	rp
FAUX	204.06363@1.892-rp	#N/A	204.064	1.892	C8H12O6	#N/A	#N/A	rp
FAUX	204.06563@1.032-rp	#N/A	204.066	1.032	#N/A	#N/A	#N/A	rp
FAUX	204.07462@1.035-rp	#N/A	204.075	1.035	C7H12N2O5	#N/A	#N/A	rp
FAUX	Tryptophan@3.078-rp	Tryptophan	204.09	3.078	C11H12N2O2	#N/A	Metabolic pathways;Biosynthesis of secondary metabolites;Biosynthesis of plant secondary metabolites;Biosynthesis of amino acids;2-Oxocarboxylic acid metabolism;Biosynthesis of phenylpropanoids;Biosynthesis of plant hormones;Biosynthesis of alkaloids derived from shikimate pathway;Other	rp
FAUX	205.07245@9.211-rp	#N/A	205.072	9.211	#N/A	#N/A	#N/A	rp
FAUX	5-methoxyindoleaceticacid@8.356-rp	5-methoxyindoleaceticacid	205.074	8.356	C11H11NO3	#N/A	Metabolic pathways;Other	rp
FAUX	5-methoxyindoleaceticacid@9.219-rp	5-methoxyindoleaceticacid	205.074	9.219	C11H11NO3	#N/A	Metabolic pathways;Other	rp
FAUX	Pantothenol@3.137-rp	Pantothenol	205.131	3.137	C9H19NO4	#N/A	Other	rp
FAUX	205.99776@1.053-rp	#N/A	205.998	1.053	C6H7O6P	#N/A	Metabolic pathways;Other	rp
FAUX	206.01018@1.321-rp	#N/A	206.01	1.321	C6H3N6OP	#N/A	#N/A	rp
FAUX	206.04279@1.497-rp	#N/A	206.043	1.497	C2H7N8O2P	#N/A	Metabolic pathways;Biosynthesis of secondary metabolites;Microbial metabolism in diverse environments;Biosynthesis of amino acids;2-Oxocarboxylic acid metabolism;Other	rp
FAUX	206.07928@2.014-rp	#N/A	206.079	2.014	C8H14O6	#N/A	#N/A	rp
FAUX	3-dimethylallyl-4-hydroxybenzoicacid@11.078-rp	3-dimethylallyl-4-hydroxybenzoicacid	206.094	11.078	C12H14O3	391947	Metabolic pathways;Biosynthesis of secondary metabolites;Ubiquinone and other terpenoid-quinone biosynthesis;Other	rp
FAUX	3-dimethylallyl-4-hydroxybenzoicacid@13.001-rp	3-dimethylallyl-4-hydroxybenzoicacid	206.094	13.001	C12H14O3	391947	Metabolic pathways;Biosynthesis of secondary metabolites;Ubiquinone and other terpenoid-quinone biosynthesis;Other	rp
FAUX	Plastoquinol-1@10.565-rp	Plastoquinol-1	206.131	10.565	C13H18O2	#N/A	Metabolic pathways;Other	rp
FAUX	Plastoquinol-1@10.117-rp	Plastoquinol-1	206.131	10.117	C13H18O2	#N/A	Metabolic pathways;Other	rp
FAUX	206.16696@18.434-rp	#N/A	206.167	18.434	C14H22O	#N/A	#N/A	rp
FAUX	207.01794@0.963-rp	#N/A	207.018	0.963	C2H7N7OP2	#N/A	#N/A	rp
FAUX	1-nitro-5,6-dihydroxy-dihydronaphthalene@6.538-rp	1-nitro-5,6-dihydroxy-dihydronaphthalene	207.053	6.538	C10H9NO4	#N/A	Metabolic pathways;Other	rp
FAUX	N-acetylphenylalanine@8.467-rp	N-acetylphenylalanine	207.09	8.467	C11H13NO3	#N/A	Metabolic pathways;Phenylalanine metabolism	rp
FAUX	N-acetylphenylalanine@8.091-rp	N-acetylphenylalanine	207.09	8.091	C11H13NO3	#N/A	Metabolic pathways;Phenylalanine metabolism	rp
FAUX	208.02199@1.084-rp	#N/A	208.022	1.084	C6H8O8	#N/A	#N/A	rp
FAUX	208.02422@1.086-rp	#N/A	208.024	1.086	C5H9N2O5P	#N/A	#N/A	rp
FAUX	208.05833@1.139-rp	#N/A	208.058	1.139	C7H12O7	#N/A	Metabolic pathways;Other	rp
FAUX	Formyl-5-hydroxykynurenamine@2.111-rp	Formyl-5-hydroxykynurenamine	208.085	2.111	C10H12N2O3	389614	Metabolic pathways;Other	rp
FAUX	208.14647@11.608-rp	#N/A	208.146	11.608	C13H20O2	#N/A	#N/A	rp
FAUX	208.1465@11.076-rp	#N/A	208.147	11.076	C13H20O2	#N/A	#N/A	rp
FAUX	208.18294@16.718-rp	#N/A	208.183	16.718	C14H24O	#N/A	#N/A	rp
FAUX	3-carbamoyl-2-phenylpropionicacid@8.726-rp	3-carbamoyl-2-phenylpropionicacid	209.069	8.726	C10H11NO4	#N/A	Other	rp
FAUX	209.96966@1.081-rp	#N/A	209.97	1.081	C2H2N4O6S	#N/A	#N/A	rp
FAUX	209.99332@1.124-rp	#N/A	209.993	1.124	C6H7ClO6	#N/A	#N/A	rp
FAUX	Galactaricacid@1.029-rp	Galactaricacid	210.037	1.029	C6H10O8	#N/A	Metabolic pathways;Other	rp
FAUX	Galactaricacid@1.06-rp	Galactaricacid	210.038	1.06	C6H10O8	#N/A	Metabolic pathways;Other	rp
FAUX	210.06531@1.616-rp	#N/A	210.065	1.616	C7H15O5P	#N/A	#N/A	rp
FAUX	Sedoheptulose@1.045-rp	Sedoheptulose	210.074	1.045	C7H14O7	4573620	Metabolic pathways;Other	rp
FAUX	3-(3,4-dimethoxyphenyl)-propionicacid@11.45-rp	3-(3,4-dimethoxyphenyl)-propionicacid	210.09	11.45	C11H14O4	#N/A	Metabolic pathways;Biosynthesis of secondary metabolites;Biosynthesis of phenylpropanoids;Other	rp
FAUX	210.13688@8.677-rp	#N/A	210.137	8.677	C11H18N2O2	#N/A	#N/A	rp
FAUX	210.51521@1.605-rp	#N/A	210.515	1.605	#N/A	#N/A	#N/A	rp
FAUX	211.09567@1.266-rp	#N/A	211.096	1.266	C9H13N3O3	#N/A	Bile secretion	rp
FAUX	211.84476@0.952-rp	#N/A	211.845	0.952	#N/A	#N/A	#N/A	rp
FAUX	2-phosphinomethylmalicacid@1.088-rp	2-phosphinomethylmalicacid	212.009	1.088	C5H9O7P	10806613	Biosynthesis of secondary metabolites;Other	rp
FAUX	Se-Methyl-Se-L-methionine@1.072-rp	Se-Methyl-Se-L-methionine	212.018	1.072	C6H14NO2Se	#N/A	Metabolic pathways;Other	rp
FAUX	212.08709@10.004-rp	#N/A	212.087	10.004	C11H16O2S	#N/A	#N/A	rp
FAUX	212.0895@1.005-rp	#N/A	212.089	1.005	C7H16O7	#N/A	#N/A	rp
FAUX	3-[(3aS,4S,5R,7aS)-5-Hydroxy-7a-methyl-1-oxo-octahydro-1H-indene-4-carboxylate@10.738-rp	3-[(3aS,4S,5R,7aS)-5-Hydroxy-7a-methyl-1-oxo-octahydro-1H-indene-4-carboxylate	212.105	10.738	C11H16O4	#N/A	Metabolic pathways;Biosynthesis of secondary metabolites;Other	rp
FAUX	Oxododecenoicacid@11.234-rp	Oxododecenoicacid	212.141	11.234	C12H20O3	#N/A	Biosynthesis of secondary metabolites;alpha-Linolenic acid metabolism	rp
FAUX	Oxododecenoicacid@13.502-rp	Oxododecenoicacid	212.142	13.502	C12H20O3	#N/A	Biosynthesis of secondary metabolites;alpha-Linolenic acid metabolism	rp
FAUX	212.57407@3.378-rp	#N/A	212.574	3.378	#N/A	#N/A	#N/A	rp
FAUX	3-indoxylsulfuricacid@4.933-rp	3-indoxylsulfuricacid	213.01	4.933	C8H7NO4S	#N/A	#N/A	rp
FAUX	213.04047@1.045-rp	#N/A	213.04	1.045	C5H12NO6P	#N/A	#N/A	rp
FAUX	213.04191@1.065-rp	#N/A	213.042	1.065	#N/A	#N/A	#N/A	rp
FAUX	213.04378@1.039-rp	#N/A	213.044	1.039	C5H7N7OS	#N/A	#N/A	rp
FAUX	214.0246@1.014-rp	#N/A	214.025	1.014	C6H7N4O3P	#N/A	Metabolic pathways;Biosynthesis of secondary metabolites;Biosynthesis of plant secondary metabolites;Biosynthesis of plant hormones;Other	rp
FAUX	214.0457@2.975-rp	#N/A	214.046	2.975	C5H16N2OP2S	#N/A	#N/A	rp
FAUX	214.06205@1.005-rp	#N/A	214.062	1.005	C5H14N2O5S	#N/A	Metabolic pathways;Microbial metabolism in diverse environments;Other	rp
FAUX	214.08018@0.883-rp	#N/A	214.08	0.883	C5H14N2O7	#N/A	#N/A	rp
FAUX	214.08412@5.006-rp	#N/A	214.084	5.006	C10H14O5	#N/A	#N/A	rp
FAUX	214.09316@0.895-rp	#N/A	214.093	0.895	C5H10N8O2	#N/A	#N/A	rp
FAUX	214.09566@1.413-rp	#N/A	214.096	1.413	C10H10N6	#N/A	#N/A	rp
FAUX	214.10299@14.261-rp	#N/A	214.103	14.261	C11H20P2	#N/A	#N/A	rp
FAUX	214.12068@9.614-rp	#N/A	214.121	9.614	C11H18O4	#N/A	#N/A	rp
FAUX	214.12092@9.974-rp	#N/A	214.121	9.974	C11H18O4	#N/A	#N/A	rp
FAUX	215.00734@0.942-rp	#N/A	215.007	0.942	C7H5NO7	#N/A	#N/A	rp
FAUX	215.02492@1.263-rp	#N/A	215.025	1.263	C8H9NO4S	#N/A	#N/A	rp
FAUX	215.05562@1.012-rp	#N/A	215.056	1.012	C8H5N7O	#N/A	Other	rp
FAUX	215.07916@1.425-rp	#N/A	215.079	1.425	C9H13NO5	#N/A	Other	rp
FAUX	215.07955@1.905-rp	#N/A	215.08	1.905	C9H13NO5	#N/A	Other	rp
FAUX	215.97756@0.945-rp	#N/A	215.978	0.945	C2H5N2O8P	#N/A	#N/A	rp
FAUX	216.04023@1.017-rp	#N/A	216.04	1.017	C6H13ClO6	#N/A	Metabolic pathways;Biosynthesis of secondary metabolites;Biosynthesis of plant secondary metabolites;Biosynthesis of plant hormones;Other	rp
FAUX	216.15155@16.358-rp	#N/A	216.152	16.358	C15H20O	#N/A	#N/A	rp
FAUX	Hydroxydodecanoicacid@13.877-rp	Hydroxydodecanoicacid	216.173	13.877	C12H24O3	#N/A	#N/A	rp
FAUX	N-acetylcitrulline@1.825-rp	N-acetylcitrulline	217.106	1.825	C8H15N3O4	9681568	Metabolic pathways;Biosynthesis of amino acids;Other	rp
FAUX	CarnitineC3:0@1.6-rp	CarnitineC3:0	217.131	1.6	C10H19NO4	#N/A	#N/A	rp
FAUX	beta-Alanyllysine@0.899-rp	beta-Alanyllysine	217.142	0.899	C9H19N3O3	3388552	Metabolic pathways;Other	rp
FAUX	217.93598@0.93-rp	#N/A	217.936	0.93	#N/A	#N/A	#N/A	rp
FAUX	Sulfosalicylicacid@1.962-rp	Sulfosalicylicacid	217.989	1.962	C7H6O6S	#N/A	Other	rp
FAUX	218.01921@0.979-rp	#N/A	218.019	0.979	C4H11O8P	#N/A	#N/A	rp
FAUX	218.04167@2.319-rp	#N/A	218.042	2.319	C8H10O7	#N/A	#N/A	rp
FAUX	218.05462@1.024-rp	#N/A	218.055	1.024	C3H7ClN10	#N/A	#N/A	rp
FAUX	218.09035@1.463-rp	#N/A	218.09	1.463	C8H14N2O5	#N/A	#N/A	rp
FAUX	218.11565@8.5-rp	#N/A	218.116	8.5	C10H18O5	#N/A	#N/A	rp
FAUX	Albaflavenone@18.575-rp	Albaflavenone	218.167	18.575	C15H22O	#N/A	Metabolic pathways;Biosynthesis of secondary metabolites;Other	rp
FAUX	218.95904@1.183-rp	#N/A	218.959	1.183	C4H3N3O4P2	#N/A	#N/A	rp
FAUX	219.05613@1.433-rp	#N/A	219.056	1.433	#N/A	#N/A	#N/A	rp
FAUX	219.07405@1.019-rp	#N/A	219.074	1.019	C3H10N9OP	#N/A	Metabolic pathways;Biosynthesis of secondary metabolites;Biosynthesis of amino acids;Other	rp
FAUX	O-succinyl-homoserine@1.729-rp	O-succinyl-homoserine	219.074	1.729	C8H13NO6	#N/A	Metabolic pathways;Biosynthesis of secondary metabolites;Biosynthesis of amino acids;Other	rp
FAUX	Pantothenicacid@3.015-rp	Pantothenicacid	219.111	3.015	C9H17NO5	#N/A	Metabolic pathways;Biosynthesis of secondary metabolites;Other	rp
FAUX	220.04316@0.825-rp	#N/A	220.043	0.825	#N/A	#N/A	#N/A	rp
FAUX	220.0694@1.023-rp	#N/A	220.069	1.023	#N/A	#N/A	#N/A	rp
FAUX	5-hydroxytryptophan@3.079-rp	5-hydroxytryptophan	220.085	3.079	C11H12N2O3	#N/A	Metabolic pathways;Biosynthesis of alkaloids derived from shikimate pathway;Other	rp
FAUX	220.57009@7.685-rp	#N/A	220.57	7.685	#N/A	#N/A	#N/A	rp
FAUX	220.86274@1.091-rp	#N/A	220.863	1.091	CH4BrNOS3	#N/A	#N/A	rp
FAUX	220.97471@1.269-rp	#N/A	220.975	1.269	C4H5N3O4P2	#N/A	#N/A	rp
FAUX	221.07185@1.531-rp	#N/A	221.072	1.531	C8H15NO4S	#N/A	#N/A	rp
FAUX	221.99076@0.919-rp	#N/A	221.991	0.919	C2H3N6O5P	#N/A	#N/A	rp
FAUX	222.01729@0.927-rp	#N/A	222.017	0.927	C6H3ClN8	#N/A	#N/A	rp
FAUX	222.06717@1-rp	#N/A	222.067	1	C3H12N8P2	#N/A	Metabolic pathways;Biosynthesis of secondary metabolites;Biosynthesis of amino acids;Other	rp
FAUX	222.07399@1.067-rp	#N/A	222.074	1.067	C8H14O7	#N/A	#N/A	rp
FAUX	222.07405@1.428-rp	#N/A	222.074	1.428	C8H14O7	#N/A	#N/A	rp
FAUX	222.10038@2.274-rp	#N/A	222.1	2.274	C11H14N2O3	#N/A	#N/A	rp
FAUX	Hexylsalicylicacid@14.411-rp	Hexylsalicylicacid	222.126	14.411	C13H18O3	#N/A	#N/A	rp
FAUX	Hexylsalicylicacid@11.164-rp	Hexylsalicylicacid	222.126	11.164	C13H18O3	#N/A	#N/A	rp
FAUX	222.12728@13.325-rp	#N/A	222.127	13.325	#N/A	#N/A	#N/A	rp
FAUX	222.84175@1.043-rp	#N/A	222.842	1.043	#N/A	#N/A	#N/A	rp
FAUX	222.9099@1.15-rp	#N/A	222.91	1.15	CH3ClNO6PS	#N/A	#N/A	rp
FAUX	222.99152@1.016-rp	#N/A	222.992	1.016	C5HN7O2S	#N/A	#N/A	rp
FAUX	223.0378@1.909-rp	#N/A	223.038	1.909	C6H11Cl2N5	#N/A	#N/A	rp
FAUX	N-acetyltyrosine@5.969-rp	N-acetyltyrosine	223.085	5.969	C11H13NO4	#N/A	#N/A	rp
FAUX	223.10529@1.114-rp	#N/A	223.105	1.114	C8H17NO6	#N/A	#N/A	rp
FAUX	223.16368@13.323-rp	#N/A	223.164	13.323	C7H21N5O3	#N/A	#N/A	rp
FAUX	223.98534@1.071-rp	#N/A	223.985	1.071	C3H6N4O4P2	#N/A	#N/A	rp
FAUX	224.00836@1.048-rp	#N/A	224.008	1.048	C6H9O7P	#N/A	#N/A	rp
FAUX	224.02742@0.902-rp	#N/A	224.027	0.902	C7H13O4PS	#N/A	#N/A	rp
FAUX	224.08957@1.097-rp	#N/A	224.09	1.097	C8H16O7	#N/A	#N/A	rp
FAUX	224.10242@8.126-rp	#N/A	224.102	8.126	C8H12N6O2	#N/A	#N/A	rp
FAUX	224.10521@6.782-rp	#N/A	224.105	6.782	C5H16N6O2S	#N/A	Metabolic pathways;Biosynthesis of secondary metabolites;Other	rp
FAUX	Jasmonicacidmethylester@13.588-rp	Jasmonicacidmethylester	224.141	13.588	C13H20O3	#N/A	Biosynthesis of secondary metabolites;alpha-Linolenic acid metabolism	rp
FAUX	Jasmonicacidmethylester@12.131-rp	Jasmonicacidmethylester	224.142	12.131	C13H20O3	#N/A	Biosynthesis of secondary metabolites;alpha-Linolenic acid metabolism	rp
FAUX	Jasmonicacidmethylester@15.298-rp	Jasmonicacidmethylester	224.142	15.298	C13H20O3	#N/A	Biosynthesis of secondary metabolites;alpha-Linolenic acid metabolism	rp
FAUX	Tetradecadienoicacid@17.591-rp	Tetradecadienoicacid	224.178	17.591	C14H24O2	#N/A	#N/A	rp
FAUX	225.03086@1.403-rp	#N/A	225.031	1.403	C6H11NO6S	#N/A	#N/A	rp
FAUX	226.06862@1.036-rp	#N/A	226.069	1.036	C7H14O8	#N/A	#N/A	rp
FAUX	226.07203@3.08-rp	#N/A	226.072	3.08	C7H19N2PS2	#N/A	#N/A	rp
FAUX	226.13168@6.986-rp	#N/A	226.132	6.986	C11H18N2O3	#N/A	#N/A	rp
FAUX	226.15712@11.607-rp	#N/A	226.157	11.607	C13H22O3	#N/A	#N/A	rp
FAUX	Myristoleicacid@18.332-rp	Myristoleicacid	226.194	18.332	C14H26O2	4444564	#N/A	rp
FAUX	227.0465@1.025-rp	#N/A	227.047	1.025	C6H13NO6S	#N/A	#N/A	rp
FAUX	2-deoxycytidine@1.295-rp	2-deoxycytidine	227.091	1.295	C9H13N3O4	#N/A	Metabolic pathways;ABC transporters;Other	rp
FAUX	228.00387@1.121-rp	#N/A	228.004	1.121	C6H9ClO7	#N/A	Other	rp
FAUX	228.06131@5.674-rp	#N/A	228.061	5.674	C6H8N6O4	#N/A	#N/A	rp
FAUX	228.08014@1.203-rp	#N/A	228.08	1.203	C5H17N4O2PS	#N/A	#N/A	rp
FAUX	228.08035@1.424-rp	#N/A	228.08	1.424	#N/A	#N/A	#N/A	rp
FAUX	228.09592@0.881-rp	#N/A	228.096	0.881	C6H16N2O7	#N/A	#N/A	rp
FAUX	228.10882@0.897-rp	#N/A	228.109	0.897	C6H12N8O2	#N/A	#N/A	rp
FAUX	BisphenolA@13.161-rp	BisphenolA	228.115	13.161	C15H16O2	#N/A	Metabolic pathways;Biosynthesis of secondary metabolites;Microbial metabolism in diverse environments;Ubiquinone and other terpenoid-quinone biosynthesis;Other	rp
FAUX	Leucylproline@0.984-rp	Leucylproline	228.147	0.984	C11H20N2O3	#N/A	#N/A	rp
FAUX	Leucylproline@2.259-rp	Leucylproline	228.147	2.259	C11H20N2O3	#N/A	#N/A	rp
FAUX	Prolylleucine@3.76-rp	Prolylleucine	228.147	3.76	C11H20N2O3	#N/A	#N/A	rp
FAUX	229.00643@12.781-rp	#N/A	229.006	12.781	C10H9Cl2NO	#N/A	#N/A	rp
FAUX	229.07042@2.438-rp	#N/A	229.07	2.438	C8H11N3O5	#N/A	#N/A	rp
FAUX	Ergothioneine@1.217-rp	Ergothioneine	229.088	1.217	C9H15N3O2S	#N/A	#N/A	rp
FAUX	229.09477@1.789-rp	#N/A	229.095	1.789	C10H15NO5	#N/A	#N/A	rp
FAUX	229.10645@1.303-rp	#N/A	229.106	1.303	C9H15N3O4	#N/A	#N/A	rp
FAUX	229.20435@13.432-rp	#N/A	229.204	13.432	C13H27NO2	#N/A	#N/A	rp
FAUX	229.97239@0.974-rp	#N/A	229.972	0.974	C7H3ClN2O5	#N/A	#N/A	rp
FAUX	Arabinose-1-phosphate@1.061-rp	Arabinose-1-phosphate	230.019	1.061	C5H11O8P	#N/A	Metabolic pathways;Biosynthesis of secondary metabolites;Microbial metabolism in diverse environments;Biosynthesis of amino acids;Purine metabolism;Carbon metabolism;Other	rp
FAUX	230.09771@9.694-rp	#N/A	230.098	9.694	C11H18O3S	#N/A	#N/A	rp
FAUX	230.0978@10.002-rp	#N/A	230.098	10.002	C11H20OP2	#N/A	#N/A	rp
FAUX	230.11579@8.361-rp	#N/A	230.116	8.361	C12H14N4O	#N/A	#N/A	rp
FAUX	Dehydrocostuslactone@12.959-rp	Dehydrocostuslactone	230.131	12.959	C15H18O2	#N/A	#N/A	rp
FAUX	230.54196@1.381-rp	#N/A	230.542	1.381	#N/A	#N/A	#N/A	rp
FAUX	230.98132@0.944-rp	#N/A	230.981	0.944	C2H7N3O6P2	#N/A	#N/A	rp
FAUX	231.02937@1.017-rp	#N/A	231.029	1.017	C3H5N9O2S	#N/A	#N/A	rp
FAUX	231.09306@9.968-rp	#N/A	231.093	9.968	C10H17NO3S	#N/A	#N/A	rp
FAUX	231.12144@1.074-rp	#N/A	231.121	1.074	C9H17N3O4	#N/A	#N/A	rp
FAUX	CarnitineC4:0@2.644-rp	CarnitineC4:0	231.147	2.644	C11H21NO4	#N/A	#N/A	rp
FAUX	231.95167@0.955-rp	#N/A	231.952	0.955	C5HN2O7P	#N/A	#N/A	rp
FAUX	232.00442@4.669-rp	#N/A	232.004	4.669	C8H10O4P2	#N/A	#N/A	rp
FAUX	232.02185@1.077-rp	#N/A	232.022	1.077	#N/A	#N/A	#N/A	rp
FAUX	232.0235@1.075-rp	#N/A	232.024	1.075	#N/A	#N/A	#N/A	rp
FAUX	232.03489@1.043-rp	#N/A	232.035	1.043	C5H13O8P	#N/A	Metabolic pathways;Other	rp
FAUX	232.05147@1.263-rp	#N/A	232.051	1.263	C8H12N2O4S	#N/A	Microbial metabolism in diverse environments;Other	rp
FAUX	232.05932@1.516-rp	#N/A	232.059	1.516	C4H9N8O2P	#N/A	#N/A	rp
FAUX	232.09501@4.993-rp	#N/A	232.095	4.993	C10H16O6	#N/A	#N/A	rp
FAUX	232.09501@7.476-rp	#N/A	232.095	7.476	C11H12N4O2	#N/A	#N/A	rp
FAUX	232.10574@1.423-rp	#N/A	232.106	1.423	C10H20N2S2	#N/A	Metabolic pathways;Biosynthesis of secondary metabolites;Biosynthesis of amino acids;Other	rp
FAUX	232.14188@0.99-rp	#N/A	232.142	0.99	#N/A	#N/A	#N/A	rp
FAUX	232.14636@16.585-rp	#N/A	232.146	16.585	C9H21N4OP	#N/A	Biosynthesis of secondary metabolites;Other	rp
FAUX	232.99991@5.139-rp	#N/A	233	5.139	C7H7NO6S	#N/A	#N/A	rp
FAUX	233.03552@1.202-rp	#N/A	233.036	1.202	C8H11NO5S	#N/A	#N/A	rp
FAUX	233.08966@1.016-rp	#N/A	233.09	1.016	C4H12N9OP	#N/A	#N/A	rp
FAUX	233.10133@1.007-rp	#N/A	233.101	1.007	C8H15N3O5	#N/A	#N/A	rp
FAUX	233.13719@0.886-rp	#N/A	233.137	0.886	#N/A	#N/A	#N/A	rp
FAUX	233.9099@0.934-rp	#N/A	233.91	0.934	#N/A	#N/A	#N/A	rp
FAUX	234.01951@1.001-rp	#N/A	234.02	1.001	#N/A	#N/A	#N/A	rp
FAUX	234.0368@2.339-rp	#N/A	234.037	2.339	C8H10O8	#N/A	#N/A	rp
FAUX	234.03762@1.169-rp	#N/A	234.038	1.169	C8H10O8	#N/A	#N/A	rp
FAUX	234.03821@2.32-rp	#N/A	234.038	2.32	C9H6N4O4	#N/A	#N/A	rp
FAUX	234.08487@1.012-rp	#N/A	234.085	1.012	C4H11ClN10	#N/A	Metabolic pathways;Biosynthesis of secondary metabolites;Other	rp
FAUX	234.15763@1.118-rp	#N/A	234.158	1.118	C10H22N2O4	#N/A	#N/A	rp
FAUX	234.56763@7.411-rp	#N/A	234.568	7.411	#N/A	#N/A	#N/A	rp
FAUX	235.07041@3.383-rp	#N/A	235.07	3.383	C9H9N5O3	#N/A	#N/A	rp
FAUX	235.95976@0.954-rp	#N/A	235.96	0.954	C4H7N4P3S	#N/A	#N/A	rp
FAUX	236.00838@1.068-rp	#N/A	236.008	1.068	C2H4N8O4S	#N/A	#N/A	rp
FAUX	236.05344@1.432-rp	#N/A	236.053	1.432	C3H9N8O3P	#N/A	#N/A	rp
FAUX	236.06218@0.888-rp	#N/A	236.062	0.888	C3H8N8O5	#N/A	#N/A	rp
FAUX	236.07955@2.91-rp	#N/A	236.08	2.91	C13H17PS	#N/A	Metabolic pathways;Other	rp
FAUX	236.85767@1.044-rp	#N/A	236.858	1.044	C4H2BrNP2S	#N/A	#N/A	rp
FAUX	237.0071@1.014-rp	#N/A	237.007	1.014	C6H3N7O2S	#N/A	#N/A	rp
FAUX	237.03778@0.981-rp	#N/A	237.038	0.981	C5H13N5P2S	#N/A	#N/A	rp
FAUX	237.05976@0.886-rp	#N/A	237.06	0.886	C9H18ClNP2	#N/A	#N/A	rp
FAUX	237.06826@1.085-rp	#N/A	237.068	1.085	#N/A	#N/A	#N/A	rp
FAUX	237.07289@0.919-rp	#N/A	237.073	0.919	C6H7N9O2	#N/A	#N/A	rp
FAUX	237.08458@1.01-rp	#N/A	237.085	1.01	C8H15NO7	#N/A	#N/A	rp
FAUX	237.08495@1.075-rp	#N/A	237.085	1.075	C8H15NO7	#N/A	#N/A	rp
FAUX	237.08589@2.325-rp	#N/A	237.086	2.325	C9H19NO2S2	#N/A	Metabolic pathways;Other	rp
FAUX	6-pyruvoyltetrahydropterin@2.625-rp	6-pyruvoyltetrahydropterin	237.087	2.625	C9H11N5O3	#N/A	Metabolic pathways;Other	rp
FAUX	237.10039@8.419-rp	#N/A	237.1	8.419	C12H15NO4	#N/A	#N/A	rp
FAUX	Felbamate@1.62-rp	Felbamate	238.095	1.62	C11H14N2O4	#N/A	Other	rp
FAUX	238.09944@1.627-rp	#N/A	238.099	1.627	C8H20N2O2P2	#N/A	#N/A	rp
FAUX	238.16793@3.541-rp	#N/A	238.168	3.541	C13H22N2O2	#N/A	#N/A	rp
FAUX	239.04386@13.8-rp	#N/A	239.044	13.8	C11H13NOS2	#N/A	#N/A	rp
FAUX	6-lactoyl-5,6,7,8-tetrahydropterin@2.615-rp	6-lactoyl-5,6,7,8-tetrahydropterin	239.102	2.615	C9H13N5O3	#N/A	Metabolic pathways;Other	rp
FAUX	240.00146@0.908-rp	#N/A	240.001	0.908	C8H4N2O7	#N/A	#N/A	rp
FAUX	240.08484@0.995-rp	#N/A	240.085	0.995	C9H12N4O4	#N/A	#N/A	rp
FAUX	240.0953@1.076-rp	#N/A	240.095	1.076	C7H16N2O7	#N/A	#N/A	rp
FAUX	Pentadecenoicacid@19.208-rp	Pentadecenoicacid	240.209	19.208	C15H28O2	#N/A	#N/A	rp
FAUX	241.00487@6.569-rp	#N/A	241.005	6.569	C9H7NO5S	#N/A	#N/A	rp
FAUX	241.02565@1.381-rp	#N/A	241.026	1.381	C6H13NO5P2	#N/A	#N/A	rp
FAUX	241.02707@1.378-rp	#N/A	241.027	1.378	C6H13NO5P2	#N/A	#N/A	rp
FAUX	241.08719@1.041-rp	#N/A	241.087	1.041	C4H16N7OPS	#N/A	#N/A	rp
FAUX	241.5546@1.071-rp	#N/A	241.555	1.071	#N/A	#N/A	#N/A	rp
FAUX	241.6344@1.087-rp	#N/A	241.634	1.087	#N/A	#N/A	#N/A	rp
FAUX	242.01259@0.813-rp	#N/A	242.013	0.813	C8H8ClN4OP	#N/A	#N/A	rp
FAUX	6-deoxy-5-ketofructose1-phosphate@1.056-rp	6-deoxy-5-ketofructose1-phosphate	242.019	1.056	C6H11O8P	#N/A	Metabolic pathways;Biosynthesis of secondary metabolites;Other	rp
FAUX	Lumichrome@9.809-rp	Lumichrome	242.081	9.809	C12H10N4O2	4483963	Other	rp
FAUX	242.18851@16.22-rp	#N/A	242.189	16.22	C14H26O3	#N/A	#N/A	rp
FAUX	243.05918@0.827-rp	#N/A	243.059	0.827	C6H13NO9	#N/A	#N/A	rp
FAUX	243.0853@1.199-rp	#N/A	243.085	1.199	C4H14ClN7O3	#N/A	Metabolic pathways;ABC transporters;Other	rp
FAUX	243.08574@1.309-rp	#N/A	243.086	1.309	C7H18NO6P	#N/A	Metabolic pathways;ABC transporters;Other	rp
FAUX	243.08733@1.038-rp	#N/A	243.087	1.038	C10H9N7O	#N/A	#N/A	rp
FAUX	244.00453@7.813-rp	#N/A	244.005	7.813	C10H4N4O2S	#N/A	#N/A	rp
FAUX	244.00454@8.102-rp	#N/A	244.005	8.102	C9H8O6S	#N/A	#N/A	rp
FAUX	244.04622@1.009-rp	#N/A	244.046	1.009	C5H13N2O7P	#N/A	#N/A	rp
FAUX	244.0517@1.261-rp	#N/A	244.052	1.261	C9H12N2O4S	#N/A	#N/A	rp
FAUX	244.05344@1.06-rp	#N/A	244.053	1.06	C9H14N2O2P2	#N/A	#N/A	rp
FAUX	Pseudouridine@1.713-rp	Pseudouridine	244.07	1.713	C9H12N2O6	#N/A	Metabolic pathways;ABC transporters;Other	rp
FAUX	244.07103@0.922-rp	#N/A	244.071	0.922	C11H19P3	#N/A	#N/A	rp
FAUX	244.07724@10.197-rp	#N/A	244.077	10.197	C11H16O4S	#N/A	#N/A	rp
FAUX	244.08276@0.904-rp	#N/A	244.083	0.904	C6H17N2O6P	#N/A	#N/A	rp
FAUX	244.08508@9.583-rp	#N/A	244.085	9.583	C6H12N8OS	#N/A	#N/A	rp
FAUX	244.09048@1.043-rp	#N/A	244.09	1.043	C6H16N2O8	#N/A	#N/A	rp
FAUX	244.09249@1.03-rp	#N/A	244.092	1.03	C8H8N10	#N/A	#N/A	rp
FAUX	244.10562@1.12-rp	#N/A	244.106	1.12	C5H13N10P	#N/A	#N/A	rp
FAUX	244.1419@1.653-rp	#N/A	244.142	1.653	#N/A	#N/A	#N/A	rp
FAUX	244.20417@15.455-rp	#N/A	244.204	15.455	C14H28O3	#N/A	#N/A	rp
FAUX	244.97357@0.999-rp	#N/A	244.974	0.999	C6H3N3O6S	#N/A	#N/A	rp
FAUX	245.08987@1.554-rp	#N/A	245.09	1.554	C5H12N9OP	#N/A	#N/A	rp
FAUX	245.1374@1.18-rp	#N/A	245.137	1.18	#N/A	#N/A	#N/A	rp
FAUX	2-methylbutyrylcarnitine@5.154-rp	2-methylbutyrylcarnitine	245.163	5.154	C12H23NO4	4932320	#N/A	rp
FAUX	2-methylbutyrylcarnitine@5.586-rp	2-methylbutyrylcarnitine	245.163	5.586	C12H23NO4	4932320	#N/A	rp
FAUX	245.17382@0.978-rp	#N/A	245.174	0.978	C11H23N3O3	#N/A	#N/A	rp
FAUX	245.92587@0.935-rp	#N/A	245.926	0.935	C4HN4O3P3	#N/A	#N/A	rp
FAUX	245.99653@0.888-rp	#N/A	245.997	0.888	C5H13O5P3	#N/A	#N/A	rp
FAUX	246.01468@1.112-rp	#N/A	246.015	1.112	C6H11ClO8	#N/A	#N/A	rp
FAUX	246.02019@7.141-rp	#N/A	246.02	7.141	C9H10O6S	#N/A	#N/A	rp
FAUX	246.02041@6.834-rp	#N/A	246.02	6.834	C9H10O6S	#N/A	#N/A	rp
FAUX	246.05055@1.049-rp	#N/A	246.051	1.049	C6H15O8P	#N/A	#N/A	rp
FAUX	246.0927@10.672-rp	#N/A	246.093	10.672	C11H18O4S	#N/A	#N/A	rp
FAUX	246.09279@6.552-rp	#N/A	246.093	6.552	C11H18O4S	#N/A	#N/A	rp
FAUX	246.10091@8.962-rp	#N/A	246.101	8.962	C6H14N8OS	#N/A	#N/A	rp
FAUX	Gamma-glutamylvaline@1.794-rp	Gamma-glutamylvaline	246.122	1.794	C10H18N2O5	#N/A	Metabolic pathways;Other	rp
FAUX	246.12226@1.426-rp	#N/A	246.122	1.426	C5H15N10P	#N/A	Metabolic pathways;Other	rp
FAUX	246.12599@13.161-rp	#N/A	246.126	13.161	C15H18O3	#N/A	#N/A	rp
FAUX	246.1262@10.678-rp	#N/A	246.126	10.678	C15H18O3	#N/A	#N/A	rp
FAUX	2-polyprenyl-6-hydroxyphenol@13.118-rp	2-polyprenyl-6-hydroxyphenol	246.162	13.118	C16H22O2	#N/A	Biosynthesis of secondary metabolites;Ubiquinone and other terpenoid-quinone biosynthesis	rp
FAUX	2-polyprenyl-6-hydroxyphenol@12.597-rp	2-polyprenyl-6-hydroxyphenol	246.162	12.597	C16H22O2	#N/A	Biosynthesis of secondary metabolites;Ubiquinone and other terpenoid-quinone biosynthesis	rp
FAUX	246.95389@1.189-rp	#N/A	246.954	1.189	C3H6NO8PS	#N/A	#N/A	rp
FAUX	Pyridoxal-5-phosphate@1.581-rp	Pyridoxal-5-phosphate	247.025	1.581	C8H10NO6P	#N/A	Metabolic pathways;Other	rp
FAUX	247.05757@4.883-rp	#N/A	247.058	4.883	C4H14N3O7P	#N/A	#N/A	rp
FAUX	N-succinylglutamicacid@3.382-rp	N-succinylglutamicacid	247.07	3.382	C9H13NO7	#N/A	Metabolic pathways;Other	rp
FAUX	247.07069@8.622-rp	#N/A	247.071	8.622	C10H9N5O3	#N/A	Metabolic pathways;Other	rp
FAUX	247.0823@1.908-rp	#N/A	247.082	1.908	C9H9N7O2	#N/A	#N/A	rp
FAUX	247.08776@3.044-rp	#N/A	247.088	3.044	C10H17NO4S	#N/A	#N/A	rp
FAUX	247.10528@1.174-rp	#N/A	247.105	1.174	C11H21NOS2	#N/A	Metabolic pathways;Biosynthesis of secondary metabolites;Other	rp
FAUX	247.10601@3.949-rp	#N/A	247.106	3.949	C11H13N5O2	#N/A	Metabolic pathways;Biosynthesis of secondary metabolites;Other	rp
FAUX	CarnitineC4:0(OH)@1.428-rp	CarnitineC4:0(OH)	247.142	1.428	C11H21NO5	#N/A	#N/A	rp
FAUX	247.1608@10.731-rp	#N/A	247.161	10.731	C12H25NO2S	#N/A	#N/A	rp
FAUX	247.99943@6.063-rp	#N/A	247.999	6.063	C3H5N8O2PS	#N/A	#N/A	rp
FAUX	248.02982@1.035-rp	#N/A	248.03	1.035	C5H13O9P	#N/A	#N/A	rp
FAUX	Abscisicaldehyde@12.961-rp	Abscisicaldehyde	248.142	12.961	C15H20O3	4445405	Metabolic pathways;Biosynthesis of secondary metabolites;Other	rp
FAUX	248.14821@1.073-rp	#N/A	248.148	1.073	C9H20N4O4	#N/A	#N/A	rp
FAUX	248.96963@1.557-rp	#N/A	248.97	1.557	C5H5N3O5P2	#N/A	#N/A	rp
FAUX	249.04208@9.15-rp	#N/A	249.042	9.15	C8H7N7OS	#N/A	#N/A	rp
FAUX	249.06699@2.039-rp	#N/A	249.067	2.039	C4H12N9PS	#N/A	#N/A	rp
FAUX	249.06705@3.383-rp	#N/A	249.067	3.383	C4H12N9PS	#N/A	#N/A	rp
FAUX	249.0861@3.38-rp	#N/A	249.086	3.38	C4H12N9O2P	#N/A	#N/A	rp
FAUX	249.08611@2.112-rp	#N/A	249.086	2.112	C10H11N5O3	#N/A	#N/A	rp
FAUX	249.08623@6.231-rp	#N/A	249.086	6.231	C10H11N5O3	#N/A	#N/A	rp
FAUX	249.95536@1.59-rp	#N/A	249.955	1.59	CH2N2O13	#N/A	Metabolic pathways;Microbial metabolism in diverse environments;Other	rp
FAUX	250.02936@1.006-rp	#N/A	250.029	1.006	C6H11N4O3PS	#N/A	#N/A	rp
FAUX	250.04117@6.51-rp	#N/A	250.041	6.51	C11H10N2O3S	#N/A	#N/A	rp
FAUX	250.06216@1.202-rp	#N/A	250.062	1.202	C10H11N4O2P	#N/A	Metabolic pathways;Other	rp
FAUX	250.07011@4.301-rp	#N/A	250.07	4.301	C10H10N4O4	#N/A	#N/A	rp
FAUX	251.06536@5.704-rp	#N/A	251.065	5.704	C9H9N5O4	#N/A	#N/A	rp
FAUX	251.0798@8.106-rp	#N/A	251.08	8.106	C12H13NO5	#N/A	#N/A	rp
FAUX	251.10008@1.024-rp	#N/A	251.1	1.024	C4H14N9O2P	#N/A	#N/A	rp
FAUX	251.51777@1.57-rp	#N/A	251.518	1.57	#N/A	#N/A	#N/A	rp
FAUX	2-deoxyinosine@3.529-rp	2-deoxyinosine	252.086	3.529	C10H12N4O4	#N/A	Metabolic pathways;Purine metabolism;ABC transporters	rp
FAUX	Alanyltyrosine@1.635-rp	Alanyltyrosine	252.111	1.635	C12H16N2O4	#N/A	#N/A	rp
FAUX	Alanyltyrosine@2.176-rp	Alanyltyrosine	252.111	2.176	C12H16N2O4	#N/A	#N/A	rp
FAUX	Isotrichodiol@16.721-rp	Isotrichodiol	252.173	16.721	C15H24O3	#N/A	Other	rp
FAUX	Hexadecadienoicacid@18.973-rp	Hexadecadienoicacid	252.209	18.973	C16H28O2	#N/A	#N/A	rp
FAUX	252.5213@1.567-rp	#N/A	252.521	1.567	#N/A	#N/A	#N/A	rp
FAUX	253.04696@0.927-rp	#N/A	253.047	0.927	C5H11N5O5S	#N/A	#N/A	rp
FAUX	253.07428@1.055-rp	#N/A	253.074	1.055	#N/A	#N/A	#N/A	rp
FAUX	253.09547@6.365-rp	#N/A	253.095	6.365	C12H15NO5	#N/A	#N/A	rp
FAUX	253.55515@1.01-rp	#N/A	253.555	1.01	#N/A	#N/A	#N/A	rp
FAUX	254.01727@0.938-rp	#N/A	254.017	0.938	C9H6N2O7	#N/A	#N/A	rp
FAUX	3,4-dihydroxyflavone@8.409-rp	3,4-dihydroxyflavone	254.057	8.409	C15H10O4	#N/A	Biosynthesis of secondary metabolites;Biosynthesis of phenylpropanoids;Other	rp
FAUX	254.05775@1.037-rp	#N/A	254.058	1.037	C7H16N2O4P2	#N/A	Biosynthesis of secondary metabolites;Biosynthesis of phenylpropanoids;Other	rp
FAUX	254.05812@10.577-rp	#N/A	254.058	10.577	C9H11N4O3P	#N/A	Biosynthesis of secondary metabolites;Biosynthesis of phenylpropanoids;Other	rp
FAUX	3,4-dihydroxyflavone@11.095-rp	3,4-dihydroxyflavone	254.058	11.095	C15H10O4	#N/A	Biosynthesis of secondary metabolites;Biosynthesis of phenylpropanoids;Other	rp
FAUX	254.06385@1.057-rp	#N/A	254.064	1.057	#N/A	#N/A	#N/A	rp
FAUX	254.06541@6.287-rp	#N/A	254.065	6.287	#N/A	#N/A	#N/A	rp
FAUX	254.11349@9.852-rp	#N/A	254.113	9.852	C9H14N6O3	#N/A	#N/A	rp
FAUX	254.1523@13.262-rp	#N/A	254.152	13.262	C14H22O4	#N/A	#N/A	rp
FAUX	Palmitoleicacid@19.836-rp	Palmitoleicacid	254.225	19.836	C16H30O2	393216	Other	rp
FAUX	255.02283@1.098-rp	#N/A	255.023	1.098	C6H9NO10	#N/A	#N/A	rp
FAUX	255.02414@8.001-rp	#N/A	255.024	8.001	C7H5N5O6	#N/A	#N/A	rp
FAUX	255.05104@1.011-rp	#N/A	255.051	1.011	C8H14ClNO6	#N/A	#N/A	rp
FAUX	255.08578@1.308-rp	#N/A	255.086	1.308	C10H13N3O5	#N/A	#N/A	rp
FAUX	255.97549@0.912-rp	#N/A	255.975	0.912	C5HN6O5P	#N/A	#N/A	rp
FAUX	255.98919@1.395-rp	#N/A	255.989	1.395	C7H4N4O5S	#N/A	#N/A	rp
FAUX	256.0173@12.778-rp	#N/A	256.017	12.778	C11H10Cl2N2O	#N/A	#N/A	rp
FAUX	256.09646@7.473-rp	#N/A	256.096	7.473	C13H12N4O2	#N/A	Other	rp
FAUX	256.09648@7.972-rp	#N/A	256.096	7.972	C11H17N2O3P	#N/A	Other	rp
FAUX	256.16797@14.233-rp	#N/A	256.168	14.233	C15H20N4	#N/A	#N/A	rp
FAUX	256.18236@17.995-rp	#N/A	256.182	17.995	C18H24O	#N/A	#N/A	rp
FAUX	256.18253@15.971-rp	#N/A	256.183	15.971	C18H24O	#N/A	#N/A	rp
FAUX	257.05701@1.026-rp	#N/A	257.057	1.026	#N/A	#N/A	#N/A	rp
FAUX	257.06495@2.441-rp	#N/A	257.065	2.441	C3H12N7O5P	#N/A	#N/A	rp
FAUX	257.06513@1.066-rp	#N/A	257.065	1.066	C9H11N3O6	#N/A	#N/A	rp
FAUX	257.06692@1.08-rp	#N/A	257.067	1.08	C9H12ClN5O2	#N/A	Metabolic pathways;Biosynthesis of secondary metabolites;Other	rp
FAUX	257.08842@2.439-rp	#N/A	257.088	2.439	C5H16N5O5P	#N/A	#N/A	rp
FAUX	Glycerophosphorylcholine@1.026-rp	Glycerophosphorylcholine	257.103	1.026	C8H20NO6P	#N/A	#N/A	rp
FAUX	257.10857@9.312-rp	#N/A	257.109	9.312	C12H19NO3S	#N/A	#N/A	rp
FAUX	257.99006@0.807-rp	#N/A	257.99	0.807	C4H7N2O9P	#N/A	#N/A	rp
FAUX	258.0507@1.384-rp	#N/A	258.051	1.384	C7H15O8P	#N/A	#N/A	rp
FAUX	258.05223@1.008-rp	#N/A	258.052	1.008	#N/A	#N/A	#N/A	rp
FAUX	258.08514@1.126-rp	#N/A	258.085	1.126	C5H11N10OP	#N/A	Metabolic pathways;Biosynthesis of secondary metabolites;Histidine metabolism;Other	rp
FAUX	258.08644@2.361-rp	#N/A	258.086	2.361	C11H18N2OS2	#N/A	Metabolic pathways;Biosynthesis of secondary metabolites;Histidine metabolism;Other	rp
FAUX	258.09634@1.99-rp	#N/A	258.096	1.99	C9H14N4O5	#N/A	#N/A	rp
FAUX	Tetradecanedioicacid@14.997-rp	Tetradecanedioicacid	258.184	14.997	C14H26O4	12630	#N/A	rp
FAUX	258.98917@0.995-rp	#N/A	258.989	0.995	C3H11N5OP2S2	#N/A	#N/A	rp
FAUX	259.01982@0.96-rp	#N/A	259.02	0.96	C16H6NOP	#N/A	#N/A	rp
FAUX	1-amino-1-deoxyinositol4-phosphate@1.045-rp	1-amino-1-deoxyinositol4-phosphate	259.046	1.045	C6H14NO8P	#N/A	Metabolic pathways;Biosynthesis of secondary metabolites;Other	rp
FAUX	259.05475@0.892-rp	#N/A	259.055	0.892	C7H9N5O6	#N/A	#N/A	rp
FAUX	259.08109@2.44-rp	#N/A	259.081	2.44	C7H18NO7P	#N/A	#N/A	rp
FAUX	CarnitineC6:0@7.562-rp	CarnitineC6:0	259.178	7.562	C13H25NO4	#N/A	#N/A	rp
FAUX	259.92091@0.956-rp	#N/A	259.921	0.956	C5H5ClO6S2	#N/A	#N/A	rp
FAUX	259.98976@1.049-rp	#N/A	259.99	1.049	C6H13BrO6	#N/A	#N/A	rp
FAUX	259.99953@7.126-rp	#N/A	260	7.126	C9H8O7S	#N/A	#N/A	rp
FAUX	260.02317@0.814-rp	#N/A	260.023	0.814	C8H10ClN4O2P	#N/A	#N/A	rp
FAUX	Allose-6-phosphate@1.06-rp	Allose-6-phosphate	260.03	1.06	C6H13O9P	#N/A	Metabolic pathways;Biosynthesis of secondary metabolites;Microbial metabolism in diverse environments;Biosynthesis of plant secondary metabolites;Biosynthesis of amino acids;ABC transporters;Biosynthesis of phenylpropanoids;Biosynthesis of plant hormones;Biosynthesis of alkaloids derived from shikimate pathway;Carbon metabolism;Other	rp
FAUX	Allose-6-phosphate@0.937-rp	Allose-6-phosphate	260.03	0.937	C6H13O9P	#N/A	Metabolic pathways;Biosynthesis of secondary metabolites;Microbial metabolism in diverse environments;Biosynthesis of plant secondary metabolites;Biosynthesis of amino acids;ABC transporters;Biosynthesis of phenylpropanoids;Biosynthesis of plant hormones;Biosynthesis of alkaloids derived from shikimate pathway;Carbon metabolism;Other	rp
FAUX	260.04504@0.938-rp	#N/A	260.045	0.938	C10H13O6P	#N/A	#N/A	rp
FAUX	260.06467@1.713-rp	#N/A	260.065	1.713	C11H19OP3	#N/A	#N/A	rp
FAUX	260.11619@7.724-rp	#N/A	260.116	7.724	C14H16N2O3	#N/A	#N/A	rp
FAUX	260.11934@10-rp	#N/A	260.119	10	C11H20N2O3S	#N/A	#N/A	rp
FAUX	260.11936@3.512-rp	#N/A	260.119	3.512	C11H20N2O3S	#N/A	#N/A	rp
FAUX	Gamma-glutamylisoleucine@1.443-rp	Gamma-glutamylisoleucine	260.137	1.443	C11H20N2O5	#N/A	#N/A	rp
FAUX	Gamma-glutamylisoleucine@1.998-rp	Gamma-glutamylisoleucine	260.137	1.998	C11H20N2O5	#N/A	#N/A	rp
FAUX	Gamma-glutamylisoleucine@3.228-rp	Gamma-glutamylisoleucine	260.137	3.228	C11H20N2O5	#N/A	#N/A	rp
FAUX	261.03091@1.58-rp	#N/A	261.031	1.58	C9H11NO6S	#N/A	#N/A	rp
FAUX	261.06145@5.971-rp	#N/A	261.061	5.971	C7H12N5O4P	#N/A	#N/A	rp
FAUX	261.07864@1.319-rp	#N/A	261.079	1.319	C9H15N3O4S	#N/A	#N/A	rp
FAUX	261.08492@1.991-rp	#N/A	261.085	1.991	C10H15NO7	#N/A	#N/A	rp
FAUX	261.09564@1.035-rp	#N/A	261.096	1.035	#N/A	#N/A	#N/A	rp
FAUX	261.09589@1.321-rp	#N/A	261.096	1.321	#N/A	#N/A	#N/A	rp
FAUX	261.11131@3.825-rp	#N/A	261.111	3.825	C13H15N3O3	#N/A	#N/A	rp
FAUX	261.1204@1.181-rp	#N/A	261.12	1.181	C6H16N9OP	#N/A	Biosynthesis of secondary metabolites;Other	rp
FAUX	261.12128@1.43-rp	#N/A	261.121	1.43	C6H16N9OP	#N/A	Biosynthesis of secondary metabolites;Other	rp
FAUX	261.12279@1.453-rp	#N/A	261.123	1.453	C6H16N9OP	#N/A	Biosynthesis of secondary metabolites;Other	rp
FAUX	261.15746@1.669-rp	#N/A	261.157	1.669	C12H23NO5	#N/A	#N/A	rp
FAUX	261.89974@0.94-rp	#N/A	261.9	0.94	C6HO6P3	#N/A	#N/A	rp
FAUX	261.97063@0.891-rp	#N/A	261.971	0.891	C3H10ClN4O2P3	#N/A	#N/A	rp
FAUX	261.97671@0.888-rp	#N/A	261.977	0.888	C12H6O3S2	#N/A	#N/A	rp
FAUX	261.98328@0.921-rp	#N/A	261.983	0.921	C7H9N2O3P3	#N/A	#N/A	rp
FAUX	261.98344@0.974-rp	#N/A	261.983	0.974	C3H7N2O10P	#N/A	#N/A	rp
FAUX	262.01513@6.346-rp	#N/A	262.015	6.346	C9H10O7S	#N/A	#N/A	rp
FAUX	262.01515@5.404-rp	#N/A	262.015	5.404	C9H10O7S	#N/A	#N/A	rp
FAUX	262.01518@3.752-rp	#N/A	262.015	3.752	C9H10O7S	#N/A	#N/A	rp
FAUX	262.04234@1.081-rp	#N/A	262.042	1.081	C5H10N8OS2	#N/A	#N/A	rp
FAUX	Galactitol-1-phosphate@1.056-rp	Galactitol-1-phosphate	262.045	1.056	C6H15O9P	#N/A	Metabolic pathways;Other	rp
FAUX	262.08042@1.431-rp	#N/A	262.08	1.431	C4H11N10O2P	#N/A	#N/A	rp
FAUX	Thiaminealdehyde@7.009-rp	Thiaminealdehyde	262.088	7.009	C12H14N4OS	#N/A	#N/A	rp
FAUX	3-hydroxygeranylhydroquinone@16.622-rp	3-hydroxygeranylhydroquinone	262.157	16.622	C16H22O3	#N/A	Biosynthesis of secondary metabolites;Ubiquinone and other terpenoid-quinone biosynthesis	rp
FAUX	3-hydroxygeranylhydroquinone@16.482-rp	3-hydroxygeranylhydroquinone	262.157	16.482	C16H22O3	#N/A	Biosynthesis of secondary metabolites;Ubiquinone and other terpenoid-quinone biosynthesis	rp
FAUX	3-hydroxygeranylhydroquinone@13.752-rp	3-hydroxygeranylhydroquinone	262.157	13.752	C16H22O3	#N/A	Biosynthesis of secondary metabolites;Ubiquinone and other terpenoid-quinone biosynthesis	rp
FAUX	262.22951@20.35-rp	#N/A	262.23	20.35	C12H31N4P	#N/A	#N/A	rp
FAUX	262.98572@2.191-rp	#N/A	262.986	2.191	C8H12NOP3S	#N/A	#N/A	rp
FAUX	4-O-Acetyl-N-acetylmannosamine@1.552-rp	4-O-Acetyl-N-acetylmannosamine	263.1	1.552	C10H17NO7	#N/A	#N/A	rp
FAUX	263.13631@13.825-rp	#N/A	263.136	13.825	C6H18N9OP	#N/A	#N/A	rp
FAUX	263.96865@0.894-rp	#N/A	263.969	0.894	C6H9BrN4OS	#N/A	#N/A	rp
FAUX	264.0481@1.24-rp	#N/A	264.048	1.24	C4H9N8O4P	#N/A	#N/A	rp
FAUX	264.07452@4.749-rp	#N/A	264.075	4.749	C14H17OPS	#N/A	#N/A	rp
FAUX	Abscisicacid@11.543-rp	Abscisicacid	264.137	11.543	C15H20O4	#N/A	Metabolic pathways;Biosynthesis of secondary metabolites;Biosynthesis of plant secondary metabolites;Biosynthesis of plant hormones;Other	rp
FAUX	Feruloylputrescine@5.203-rp	Feruloylputrescine	264.147	5.203	C14H20N2O3	#N/A	Metabolic pathways;Other	rp
FAUX	5-hydroxy-1-hydroxyphenyl-3-decanone@13.116-rp	5-hydroxy-1-hydroxyphenyl-3-decanone	264.173	13.116	C16H24O3	#N/A	Biosynthesis of secondary metabolites;Other	rp
FAUX	264.17299@17.51-rp	#N/A	264.173	17.51	C9H24N6OS	#N/A	Biosynthesis of secondary metabolites;Other	rp
FAUX	264.59627@1.618-rp	#N/A	264.596	1.618	#N/A	#N/A	#N/A	rp
FAUX	265.03489@1.582-rp	#N/A	265.035	1.582	C8H12NO7P	#N/A	#N/A	rp
FAUX	265.06552@1.177-rp	#N/A	265.066	1.177	C9H16ClN3O2S	#N/A	#N/A	rp
FAUX	265.09801@1.612-rp	#N/A	265.098	1.612	C7H17ClN7P	#N/A	#N/A	rp
FAUX	265.11571@1.025-rp	#N/A	265.116	1.025	C5H16N9O2P	#N/A	#N/A	rp
FAUX	265.99651@1.761-rp	#N/A	265.997	1.761	C3H11N2O8PS	#N/A	#N/A	rp
FAUX	266.05572@8.491-rp	#N/A	266.056	8.491	C12H14N2OS2	#N/A	#N/A	rp
FAUX	266.0907@4.408-rp	#N/A	266.091	4.408	C12H14N2O5	#N/A	#N/A	rp
FAUX	266.12648@1.76-rp	#N/A	266.126	1.76	C13H18N2O4	#N/A	Metabolic pathways;Other	rp
FAUX	266.12651@2.582-rp	#N/A	266.127	2.582	C13H18N2O4	#N/A	Metabolic pathways;Other	rp
FAUX	266.98207@2.322-rp	#N/A	266.982	2.322	C3H10NO9PS	#N/A	#N/A	rp
FAUX	2-deoxyguanosine@4.298-rp	2-deoxyguanosine	267.097	4.298	C10H13N5O4	#N/A	Metabolic pathways;Purine metabolism;ABC transporters;Bile secretion;Other	rp
FAUX	267.966@1.59-rp	#N/A	267.966	1.59	C3H9O10PS	#N/A	#N/A	rp
FAUX	267.97514@1.085-rp	#N/A	267.975	1.085	C7H5N6PS2	#N/A	#N/A	rp
FAUX	267.99107@0.915-rp	#N/A	267.991	0.915	C6H9N2O6PS	#N/A	#N/A	rp
FAUX	267.99228@1.18-rp	#N/A	267.992	1.18	C4H9BrN6O3	#N/A	#N/A	rp
FAUX	268.00226@7.143-rp	#N/A	268.002	7.143	C7H4N6O4S	#N/A	#N/A	rp
FAUX	268.07972@1.062-rp	#N/A	268.08	1.062	C10H20O4S2	#N/A	Metabolic pathways;Purine metabolism;ABC transporters;Other	rp
FAUX	Inosine@2.445-rp	Inosine	268.081	2.445	C10H12N4O5	#N/A	Metabolic pathways;Purine metabolism;ABC transporters	rp
FAUX	Inosine@2.696-rp	Inosine	268.081	2.696	C10H12N4O5	#N/A	Metabolic pathways;Purine metabolism;ABC transporters	rp
FAUX	268.10564@1.595-rp	#N/A	268.106	1.595	C13H20N2S2	#N/A	#N/A	rp
FAUX	268.11612@1.749-rp	#N/A	268.116	1.749	C10H20O8	#N/A	#N/A	rp
FAUX	268.20398@13.283-rp	#N/A	268.204	13.283	C16H28O3	#N/A	#N/A	rp
FAUX	268.20439@16.813-rp	#N/A	268.204	16.813	C16H28O3	#N/A	#N/A	rp
FAUX	Heptadecenoicacid@20.577-rp	Heptadecenoicacid	268.241	20.577	C17H32O2	#N/A	#N/A	rp
FAUX	269.05722@1.127-rp	#N/A	269.057	1.127	C8H15NO7S	#N/A	#N/A	rp
FAUX	269.08989@2.757-rp	#N/A	269.09	2.757	C13H19NOS2	#N/A	#N/A	rp
FAUX	269.11074@1.009-rp	#N/A	269.111	1.009	C12H20N3PS	#N/A	#N/A	rp
FAUX	269.16329@9.716-rp	#N/A	269.163	9.716	C15H19N5	#N/A	#N/A	rp
FAUX	269.99076@1.082-rp	#N/A	269.991	1.082	C6H3N6O5P	#N/A	#N/A	rp
FAUX	2-hydroxydaidzein@9.339-rp	2-hydroxydaidzein	270.052	9.339	C15H10O5	#N/A	Metabolic pathways;Biosynthesis of secondary metabolites;Biosynthesis of phenylpropanoids;Other	rp
FAUX	270.05336@12.432-rp	#N/A	270.053	12.432	C16H6N4O	#N/A	Metabolic pathways;Biosynthesis of secondary metabolites;Biosynthesis of phenylpropanoids;Other	rp
FAUX	270.07338@1.063-rp	#N/A	270.073	1.063	C16H16P2	#N/A	Other	rp
FAUX	270.08507@3.435-rp	#N/A	270.085	3.435	C11H14N2O6	#N/A	#N/A	rp
FAUX	270.08738@8.14-rp	#N/A	270.087	8.14	C10H15N4O3P	#N/A	#N/A	rp
FAUX	270.09557@1.266-rp	#N/A	270.096	1.266	C6H20N6P2S	#N/A	#N/A	rp
FAUX	Estrone@13.546-rp	Estrone	270.162	13.546	C18H22O2	#N/A	Metabolic pathways;Other	rp
FAUX	16-oxo-palmiticacid@16.046-rp	16-oxo-palmiticacid	270.22	16.046	C16H30O3	#N/A	Metabolic pathways;Cutin, suberine and wax biosynthesis	rp
FAUX	Margaricacid@21.499-rp	Margaricacid	270.256	21.499	C17H34O2	10033	#N/A	rp
FAUX	270.97789@1.596-rp	#N/A	270.978	1.596	C5H3N7O3P2	#N/A	#N/A	rp
FAUX	271.95311@1.097-rp	#N/A	271.953	1.097	C6H9BrO7	#N/A	#N/A	rp
FAUX	271.96244@11.074-rp	#N/A	271.962	11.074	C7H2Cl2N6O2	#N/A	#N/A	rp
FAUX	271.99354@1.147-rp	#N/A	271.994	1.147	C9H8N2O4S2	#N/A	#N/A	rp
FAUX	272.01156@0.988-rp	#N/A	272.012	0.988	C2H8N8O4S2	#N/A	#N/A	rp
FAUX	2-hydroxydihydrodaidzein@9.637-rp	2-hydroxydihydrodaidzein	272.068	9.637	C15H12O5	#N/A	Metabolic pathways;Biosynthesis of secondary metabolites;Biosynthesis of phenylpropanoids;Other	rp
FAUX	272.07669@2.326-rp	#N/A	272.077	2.326	C10H8N8O2	#N/A	#N/A	rp
FAUX	272.16276@11.999-rp	#N/A	272.163	11.999	C9H21N8P	#N/A	#N/A	rp
FAUX	272.21461@16.938-rp	#N/A	272.215	16.938	C19H28O	#N/A	#N/A	rp
FAUX	272.83442@1.046-rp	#N/A	272.834	1.046	C3H3BrNOP3S	#N/A	#N/A	rp
FAUX	273.0617@1.032-rp	#N/A	273.062	1.032	C7H16NO8P	#N/A	Bile secretion	rp
FAUX	273.08475@1.112-rp	#N/A	273.085	1.112	C11H15NO7	#N/A	#N/A	rp
FAUX	273.09649@1.291-rp	#N/A	273.096	1.291	C10H15N3O6	#N/A	#N/A	rp
FAUX	273.17609@11.801-rp	#N/A	273.176	11.801	C14H27NO2S	#N/A	#N/A	rp
FAUX	CarnitineC7:0@9.006-rp	CarnitineC7:0	273.194	9.006	C14H27NO4	#N/A	#N/A	rp
FAUX	274.01533@8.183-rp	#N/A	274.015	8.183	C10H10O7S	#N/A	#N/A	rp
FAUX	274.04553@1.055-rp	#N/A	274.046	1.055	C8H11N4O5P	#N/A	Metabolic pathways;Biosynthesis of secondary metabolites;Other	rp
FAUX	274.06215@2.556-rp	#N/A	274.062	2.556	C10H14N2O5S	#N/A	#N/A	rp
FAUX	274.09758@1.222-rp	#N/A	274.098	1.222	#N/A	#N/A	Biosynthesis of secondary metabolites;Other	rp
FAUX	274.10002@1.259-rp	#N/A	274.1	1.259	C7H18N2O9	#N/A	#N/A	rp
FAUX	274.1168@3.234-rp	#N/A	274.117	3.234	C11H18N2O6	#N/A	#N/A	rp
FAUX	274.14223@10.451-rp	#N/A	274.142	10.451	C13H22O6	#N/A	#N/A	rp
FAUX	274.14225@10.701-rp	#N/A	274.142	10.701	C13H22O6	#N/A	#N/A	rp
FAUX	274.19314@17.983-rp	#N/A	274.193	17.983	C18H26O2	#N/A	#N/A	rp
FAUX	275.10013@1.456-rp	#N/A	275.1	1.456	C6H14N9O2P	#N/A	#N/A	rp
FAUX	275.11917@7.116-rp	#N/A	275.119	7.116	C12H21NO4S	#N/A	#N/A	rp
FAUX	Glutarylcarnitine@1.72-rp	Glutarylcarnitine	275.137	1.72	C12H21NO6	#N/A	#N/A	rp
FAUX	275.17339@2.567-rp	#N/A	275.173	2.567	C8H22N9P	#N/A	#N/A	rp
FAUX	275.89486@0.953-rp	#N/A	275.895	0.953	C4H5Cl2N2O2P3	#N/A	#N/A	rp
FAUX	276.00046@0.806-rp	#N/A	276	0.806	C5H9ClN2O9	#N/A	#N/A	rp
FAUX	6-phosphogluconicacid@1.204-rp	6-phosphogluconicacid	276.025	1.204	C6H13O10P	#N/A	Metabolic pathways;Biosynthesis of secondary metabolites;Microbial metabolism in diverse environments;Carbon metabolism;Other	rp
FAUX	276.03103@7.405-rp	#N/A	276.031	7.405	C10H12O7S	#N/A	#N/A	rp
FAUX	276.05982@1.714-rp	#N/A	276.06	1.714	C4H9N10O3P	#N/A	#N/A	rp
FAUX	276.06141@1.036-rp	#N/A	276.061	1.036	#N/A	#N/A	#N/A	rp
FAUX	276.06741@7.421-rp	#N/A	276.067	7.421	C12H20OS3	#N/A	#N/A	rp
FAUX	Biotinsulfone@2.077-rp	Biotinsulfone	276.078	2.077	C10H16N2O5S	75678	Other	rp
FAUX	Gamma-glutamylglutamicacid@1.18-rp	Gamma-glutamylglutamicacid	276.095	1.18	C10H16N2O7	#N/A	Other	rp
FAUX	276.11153@9.066-rp	#N/A	276.112	9.066	C15H12N6	#N/A	#N/A	rp
FAUX	276.13185@1.008-rp	#N/A	276.132	1.008	C13H27P3	#N/A	Metabolic pathways;Biosynthesis of secondary metabolites;Biosynthesis of amino acids;Other	rp
FAUX	Stearidonicacid@17.178-rp	Stearidonicacid	276.209	17.178	C18H28O2	4471933	Biosynthesis of secondary metabolites;alpha-Linolenic acid metabolism	rp
FAUX	276.20879@16.592-rp	#N/A	276.209	16.592	C18H28O2	#N/A	Biosynthesis of secondary metabolites;alpha-Linolenic acid metabolism	rp
FAUX	Stearidonicacid@18.898-rp	Stearidonicacid	276.209	18.898	C18H28O2	4471933	Biosynthesis of secondary metabolites;alpha-Linolenic acid metabolism	rp
FAUX	277.07352@1.297-rp	#N/A	277.074	1.297	C10H11N7OS	#N/A	#N/A	rp
FAUX	277.11722@2.01-rp	#N/A	277.117	2.01	C12H15N5O3	#N/A	#N/A	rp
FAUX	277.56511@1.238-rp	#N/A	277.565	1.238	#N/A	#N/A	#N/A	rp
FAUX	277.87374@0.938-rp	#N/A	277.874	0.938	#N/A	#N/A	#N/A	rp
FAUX	277.94421@0.895-rp	#N/A	277.944	0.895	C6H6ClN4OP3	#N/A	#N/A	rp
FAUX	277.94742@0.898-rp	#N/A	277.947	0.898	C7H3O10P	#N/A	#N/A	rp
FAUX	277.9573@0.931-rp	#N/A	277.957	0.931	C8H8O5P2S	#N/A	#N/A	rp
FAUX	278.0404@1.045-rp	#N/A	278.04	1.045	C6H15O10P	#N/A	#N/A	rp
FAUX	278.07522@1.713-rp	#N/A	278.075	1.713	C10H18N2O3S2	#N/A	Metabolic pathways;Biosynthesis of secondary metabolites;Other	rp
FAUX	278.09352@1.437-rp	#N/A	278.094	1.437	C12H23OPS2	#N/A	#N/A	rp
FAUX	278.10283@12.645-rp	#N/A	278.103	12.645	C5H16N10P2	#N/A	#N/A	rp
FAUX	Pantetheine@6.409-rp	Pantetheine	278.13	6.409	C11H22N2O4S	#N/A	Biosynthesis of secondary metabolites;Other	rp
FAUX	278.16293@7.49-rp	#N/A	278.163	7.49	C15H22N2O3	#N/A	#N/A	rp
FAUX	278.18826@13.902-rp	#N/A	278.188	13.902	C10H26N6OS	#N/A	#N/A	rp
FAUX	Crepenynicacid@17.871-rp	Crepenynicacid	278.224	17.871	C18H30O2	#N/A	Metabolic pathways;Biosynthesis of secondary metabolites;Biosynthesis of plant secondary metabolites;Biosynthesis of plant hormones;alpha-Linolenic acid metabolism;Other	rp
FAUX	Crepenynicacid@17.298-rp	Crepenynicacid	278.224	17.298	C18H30O2	#N/A	Metabolic pathways;Biosynthesis of secondary metabolites;Biosynthesis of plant secondary metabolites;Biosynthesis of plant hormones;alpha-Linolenic acid metabolism;Other	rp
FAUX	Crepenynicacid@17.639-rp	Crepenynicacid	278.224	17.639	C18H30O2	#N/A	Metabolic pathways;Biosynthesis of secondary metabolites;Biosynthesis of plant secondary metabolites;Biosynthesis of plant hormones;alpha-Linolenic acid metabolism;Other	rp
FAUX	Crepenynicacid@19.596-rp	Crepenynicacid	278.225	19.596	C18H30O2	#N/A	Metabolic pathways;Biosynthesis of secondary metabolites;Biosynthesis of plant secondary metabolites;Biosynthesis of plant hormones;alpha-Linolenic acid metabolism;Other	rp
FAUX	279.08462@0.988-rp	#N/A	279.085	0.988	C8H19N5P2S	#N/A	#N/A	rp
FAUX	279.1032@12.641-rp	#N/A	279.103	12.641	C5H13N9O5	#N/A	#N/A	rp
FAUX	279.11473@9.144-rp	#N/A	279.115	9.144	C12H17N5OS	#N/A	#N/A	rp
FAUX	279.9417@0.897-rp	#N/A	279.942	0.897	C2H7N2O8P3	#N/A	#N/A	rp
FAUX	279.95735@1.762-rp	#N/A	279.957	1.762	C4H8O10S2	#N/A	#N/A	rp
FAUX	280.03302@0.979-rp	#N/A	280.033	0.979	C4H14ClN4O6P	#N/A	#N/A	rp
FAUX	280.12959@15.621-rp	#N/A	280.13	15.621	C9H21N4O4P	#N/A	#N/A	rp
FAUX	9,11-octadecadienoicacid@20.359-rp	9,11-octadecadienoicacid	280.24	20.359	C18H32O2	#N/A	Metabolic pathways;Biosynthesis of plant secondary metabolites;Other	rp
FAUX	281.03661@0.921-rp	#N/A	281.037	0.921	C6H14N5O2P3	#N/A	#N/A	rp
FAUX	281.05811@2.111-rp	#N/A	281.058	2.111	C9H15NO7S	#N/A	#N/A	rp
FAUX	281.07952@1.023-rp	#N/A	281.08	1.023	C9H12N7O2P	#N/A	#N/A	rp
FAUX	281.11055@1.023-rp	#N/A	281.111	1.023	C5H16N9O3P	#N/A	#N/A	rp
FAUX	281.11243@6.399-rp	#N/A	281.112	6.399	C12H11N9	#N/A	#N/A	rp
FAUX	282.01175@0.929-rp	#N/A	282.012	0.929	C6H12N4O3P2S	#N/A	#N/A	rp
FAUX	282.05882@1.248-rp	#N/A	282.059	1.248	C10H18O5S2	#N/A	#N/A	rp
FAUX	Xylobiose@1.092-rp	Xylobiose	282.095	1.092	C10H18O9	141332	ABC transporters	rp
FAUX	Xylobiose@1.725-rp	Xylobiose	282.095	1.725	C10H18O9	141332	ABC transporters	rp
FAUX	282.12135@1.75-rp	#N/A	282.121	1.75	C13H18N2O5	#N/A	#N/A	rp
FAUX	13-octadecenoicacid@21.294-rp	13-octadecenoicacid	282.256	21.294	C18H34O2	#N/A	Biosynthesis of plant secondary metabolites;Cutin, suberine and wax biosynthesis;Other	rp
FAUX	283.03908@0.811-rp	#N/A	283.039	0.811	C4H12ClN9P2	#N/A	#N/A	rp
FAUX	283.04601@1.084-rp	#N/A	283.046	1.084	C9H18NO3PS2	#N/A	#N/A	rp
FAUX	283.07374@2.115-rp	#N/A	283.074	2.115	C12H10N7P	#N/A	#N/A	rp
FAUX	283.07377@3.383-rp	#N/A	283.074	3.383	C10H13N5O3S	#N/A	#N/A	rp
FAUX	283.09152@2.1-rp	#N/A	283.092	2.1	C9H17NO9	#N/A	Metabolic pathways;Purine metabolism;ABC transporters	rp
FAUX	Guanosine@2.625-rp	Guanosine	283.092	2.625	C10H13N5O5	6544	Metabolic pathways;Purine metabolism;ABC transporters	rp
FAUX	283.1298@0.96-rp	#N/A	283.13	0.96	C11H27NOP2S	#N/A	#N/A	rp
FAUX	283.96499@0.92-rp	#N/A	283.965	0.92	C6H4O13	#N/A	#N/A	rp
FAUX	284.00634@1.083-rp	#N/A	284.006	1.083	C5H8N4O8S	#N/A	#N/A	rp
FAUX	284.03606@0.86-rp	#N/A	284.036	0.86	C4H8N6O9	#N/A	#N/A	rp
FAUX	Xanthosine@3.249-rp	Xanthosine	284.076	3.249	C10H12N4O6	58484	Metabolic pathways;Biosynthesis of secondary metabolites;Purine metabolism;ABC transporters;Other	rp
FAUX	Xanthosine@2.441-rp	Xanthosine	284.076	2.441	C10H12N4O6	58484	Metabolic pathways;Biosynthesis of secondary metabolites;Purine metabolism;ABC transporters;Other	rp
FAUX	Benzoyl-?-D-glucopyranose@6.726-rp	Benzoyl-?-D-glucopyranose	284.09	6.726	C13H16O7	#N/A	#N/A	rp
FAUX	285.05266@8.73-rp	#N/A	285.053	8.73	C3H12N9O3PS	#N/A	#N/A	rp
FAUX	285.10148@8.349-rp	#N/A	285.101	8.349	C9H15N7O2S	#N/A	#N/A	rp
FAUX	286.00927@1.121-rp	#N/A	286.009	1.121	C2H8N8O5P2	#N/A	#N/A	rp
FAUX	286.06929@1.742-rp	#N/A	286.069	1.742	C5H14N6O6S	#N/A	#N/A	rp
FAUX	286.09333@3.08-rp	#N/A	286.093	3.08	C12H21N2P3	#N/A	#N/A	rp
FAUX	286.1275@1.112-rp	#N/A	286.127	1.112	C13H23N2OPS	#N/A	#N/A	rp
FAUX	286.17835@11.08-rp	#N/A	286.178	11.08	C16H30S2	#N/A	#N/A	rp
FAUX	286.17857@7.749-rp	#N/A	286.179	7.749	C16H30S2	#N/A	#N/A	rp
FAUX	Hexadecanedioicacid@16.599-rp	Hexadecanedioicacid	286.215	16.599	C16H30O4	#N/A	Metabolic pathways;Cutin, suberine and wax biosynthesis	rp
FAUX	286.21481@13.281-rp	#N/A	286.215	13.281	C17H26N4	#N/A	Metabolic pathways;Cutin, suberine and wax biosynthesis	rp
FAUX	286.9488@1.432-rp	#N/A	286.949	1.432	CH4N7O5P3	#N/A	#N/A	rp
FAUX	286.95021@1.428-rp	#N/A	286.95	1.428	C7H3N3O6P2	#N/A	#N/A	rp
FAUX	287.01048@6.13-rp	#N/A	287.01	6.13	C10H11NO5P2	#N/A	#N/A	rp
FAUX	287.05707@1.748-rp	#N/A	287.057	1.748	C6H11N9OP2	#N/A	#N/A	rp
FAUX	287.05763@1.433-rp	#N/A	287.058	1.433	C4H16N7O2P3	#N/A	#N/A	rp
FAUX	287.06713@1.032-rp	#N/A	287.067	1.032	C8H17NO8S	#N/A	#N/A	rp
FAUX	287.10097@2.756-rp	#N/A	287.101	2.756	C12H17NO7	#N/A	#N/A	rp
FAUX	287.13677@2.057-rp	#N/A	287.137	2.057	C13H21NO6	#N/A	#N/A	rp
FAUX	CarnitineC8:0@10.256-rp	CarnitineC8:0	287.21	10.256	C15H29NO4	#N/A	#N/A	rp
FAUX	287.98543@0.984-rp	#N/A	287.985	0.984	C3H9N6O4PS2	#N/A	#N/A	rp
FAUX	Orotidine@1.384-rp	Orotidine	288.059	1.384	C10H12N2O8	83729	#N/A	rp
FAUX	288.08425@1.068-rp	#N/A	288.084	1.068	C7H17ClN4O6	#N/A	#N/A	rp
FAUX	288.11738@0.836-rp	#N/A	288.117	0.836	C12H21ClN4S	#N/A	#N/A	rp
FAUX	10,16-dihydroxyhexadecanoicacid@14.671-rp	10,16-dihydroxyhexadecanoicacid	288.231	14.671	C16H32O4	#N/A	Cutin, suberine and wax biosynthesis	rp
FAUX	288.61947@12.29-rp	#N/A	288.619	12.29	#N/A	#N/A	#N/A	rp
FAUX	289.06828@1.049-rp	#N/A	289.068	1.049	C5H15N5O7S	#N/A	#N/A	rp
FAUX	289.07336@1.277-rp	#N/A	289.073	1.277	C10H15N3O5S	#N/A	#N/A	rp
FAUX	289.07857@4.277-rp	#N/A	289.079	4.277	C15H17NOP2	#N/A	Metabolic pathways;Microbial metabolism in diverse environments;Biosynthesis of amino acids;Other	rp
FAUX	Succinyl-2-aminooxoheptanedioicacid@1.103-rp	Succinyl-2-aminooxoheptanedioicacid	289.08	1.103	C11H15NO8	#N/A	Metabolic pathways;Microbial metabolism in diverse environments;Biosynthesis of amino acids;Other	rp
FAUX	289.09079@1.02-rp	#N/A	289.091	1.02	C11H19N3O2S2	#N/A	#N/A	rp
FAUX	289.11593@3.172-rp	#N/A	289.116	3.172	C13H15N5O3	#N/A	#N/A	rp
FAUX	Ophthalmicacid@1.39-rp	Ophthalmicacid	289.127	1.39	C11H19N3O6	#N/A	Metabolic pathways;Biosynthesis of secondary metabolites;Other	rp
FAUX	3-methylglutarylcarnitine@4.615-rp	3-methylglutarylcarnitine	289.152	4.615	C13H23NO6	#N/A	#N/A	rp
FAUX	3-methylglutarylcarnitine@2.805-rp	3-methylglutarylcarnitine	289.152	2.805	C13H23NO6	#N/A	#N/A	rp
FAUX	289.56529@2.763-rp	#N/A	289.565	2.763	#N/A	#N/A	#N/A	rp
FAUX	290.00424@1.138-rp	#N/A	290.004	1.138	C6H11O11P	#N/A	#N/A	rp
FAUX	290.04045@1.043-rp	#N/A	290.04	1.043	C8H11N4O6P	#N/A	Metabolic pathways;Biosynthesis of secondary metabolites;Microbial metabolism in diverse environments;Biosynthesis of amino acids;Carbon metabolism;Other	rp
FAUX	290.04646@8.523-rp	#N/A	290.046	8.523	C11H14O7S	#N/A	#N/A	rp
FAUX	290.05681@1.273-rp	#N/A	290.057	1.273	C10H14N2O6S	#N/A	#N/A	rp
FAUX	290.07555@1.489-rp	#N/A	290.076	1.489	C5H11N10O3P	#N/A	#N/A	rp
FAUX	290.09751@1.745-rp	#N/A	290.098	1.745	C9H10N10O2	#N/A	#N/A	rp
FAUX	290.11105@1.024-rp	#N/A	290.111	1.024	C6H15N10O2P	#N/A	Metabolic pathways;Microbial metabolism in diverse environments;Biosynthesis of amino acids;Other	rp
FAUX	290.11598@7.257-rp	#N/A	290.116	7.257	C9H20N6OP2	#N/A	#N/A	rp
FAUX	290.1225@1.011-rp	#N/A	290.123	1.011	C20H19P	#N/A	Metabolic pathways;Biosynthesis of secondary metabolites;Biosynthesis of amino acids;Other	rp
FAUX	290.18839@15.325-rp	#N/A	290.188	15.325	C18H26O3	#N/A	#N/A	rp
FAUX	291.06847@1.234-rp	#N/A	291.068	1.234	C5H19N5O3P2S	#N/A	#N/A	rp
FAUX	291.09506@1.093-rp	#N/A	291.095	1.093	C5H18N5O7P	#N/A	#N/A	rp
FAUX	291.10602@1.175-rp	#N/A	291.106	1.175	C12H22NO3PS	#N/A	#N/A	rp
FAUX	291.86861@0.956-rp	#N/A	291.869	0.956	C7HCl2N2OP3	#N/A	#N/A	rp
FAUX	292.05618@1.04-rp	#N/A	292.056	1.04	C7H17O10P	#N/A	#N/A	rp
FAUX	292.12804@11.473-rp	#N/A	292.128	11.473	C12H24N2O2S2	#N/A	#N/A	rp
FAUX	10-OPDA@17.062-rp	10-OPDA	292.204	17.062	C18H28O3	28656896	Metabolic pathways;Biosynthesis of secondary metabolites;alpha-Linolenic acid metabolism	rp
FAUX	293.04329@1.766-rp	#N/A	293.043	1.766	C9H16N3O2PS2	#N/A	#N/A	rp
FAUX	293.06834@1.443-rp	#N/A	293.068	1.443	C9H15N3O6S	#N/A	#N/A	rp
FAUX	293.07971@1.039-rp	#N/A	293.08	1.039	C9H17ClN5O2P	#N/A	#N/A	rp
FAUX	293.13742@1.85-rp	#N/A	293.137	1.85	C14H19N3O4	#N/A	#N/A	rp
FAUX	293.14844@1.442-rp	#N/A	293.148	1.442	C13H27NO2S2	#N/A	#N/A	rp
FAUX	293.92182@0.902-rp	#N/A	293.922	0.902	C3HN6O5P3	#N/A	#N/A	rp
FAUX	293.93156@0.938-rp	#N/A	293.932	0.938	C4H4N6O2P2S2	#N/A	#N/A	rp
FAUX	294.00316@1.052-rp	#N/A	294.003	1.052	C5H8N6O5P2	#N/A	#N/A	rp
FAUX	294.05925@2.323-rp	#N/A	294.059	2.323	C7H16N6OP2S	#N/A	#N/A	rp
FAUX	294.07048@1.718-rp	#N/A	294.07	1.718	C6H16N8P2S	#N/A	#N/A	rp
FAUX	294.08647@7.689-rp	#N/A	294.086	7.689	C15H21P3	#N/A	#N/A	rp
FAUX	294.12145@4.496-rp	#N/A	294.121	4.496	C8H19N6O4P	#N/A	Other	rp
FAUX	294.12148@2.227-rp	#N/A	294.121	2.227	C16H23OPS	#N/A	Other	rp
FAUX	294.12212@7.274-rp	#N/A	294.122	7.274	C15H14N6O	#N/A	Other	rp
FAUX	13(S)-HOT@12.717-rp	13(S)-HOT	294.219	12.717	C18H30O3	#N/A	Metabolic pathways;Biosynthesis of secondary metabolites;Biosynthesis of plant hormones;alpha-Linolenic acid metabolism;Other	rp
FAUX	13(S)-HOT@17.877-rp	13(S)-HOT	294.219	17.877	C18H30O3	#N/A	Metabolic pathways;Biosynthesis of secondary metabolites;Biosynthesis of plant hormones;alpha-Linolenic acid metabolism;Other	rp
FAUX	13(S)-HOT@17.653-rp	13(S)-HOT	294.22	17.653	C18H30O3	#N/A	Metabolic pathways;Biosynthesis of secondary metabolites;Biosynthesis of plant hormones;alpha-Linolenic acid metabolism;Other	rp
FAUX	13(S)-HOT@16.596-rp	13(S)-HOT	294.22	16.596	C18H30O3	#N/A	Metabolic pathways;Biosynthesis of secondary metabolites;Biosynthesis of plant hormones;alpha-Linolenic acid metabolism;Other	rp
FAUX	294.61024@10.491-rp	#N/A	294.61	10.491	#N/A	#N/A	#N/A	rp
FAUX	295.01293@1.018-rp	#N/A	295.013	1.018	C5H14NO9PS	#N/A	#N/A	rp
FAUX	295.05864@1.012-rp	#N/A	295.059	1.012	C9H10N7O3P	#N/A	Metabolic pathways;Biosynthesis of secondary metabolites;Purine metabolism;Other	rp
FAUX	295.13884@17.103-rp	#N/A	295.139	17.103	#N/A	#N/A	#N/A	rp
FAUX	295.15453@1.441-rp	#N/A	295.155	1.441	#N/A	#N/A	#N/A	rp
FAUX	296.10108@1.431-rp	#N/A	296.101	1.431	C6H18N8O2P2	#N/A	#N/A	rp
FAUX	296.10452@1.383-rp	#N/A	296.105	1.383	C11H16N6O2S	#N/A	#N/A	rp
FAUX	296.1241@9.969-rp	#N/A	296.124	9.969	C11H16N6O4	#N/A	#N/A	rp
FAUX	296.14733@4.973-rp	#N/A	296.147	4.973	C12H24O8	#N/A	#N/A	rp
FAUX	12(13)-EpOME@17.295-rp	12(13)-EpOME	296.235	17.295	C18H32O3	#N/A	Metabolic pathways;Cutin, suberine and wax biosynthesis;Other	rp
FAUX	12(13)-EpOME@16.918-rp	12(13)-EpOME	296.236	16.918	C18H32O3	#N/A	Metabolic pathways;Cutin, suberine and wax biosynthesis;Other	rp
FAUX	Nonadecenoicacid@21.989-rp	Nonadecenoicacid	296.272	21.989	C19H36O2	#N/A	#N/A	rp
FAUX	297.01014@0.922-rp	#N/A	297.01	0.922	C9H10N5OP3	#N/A	#N/A	rp
FAUX	297.02842@1.013-rp	#N/A	297.028	1.013	C6H12N5O5PS	#N/A	#N/A	rp
FAUX	297.02994@1.01-rp	#N/A	297.03	1.01	C5H11N7O4S2	#N/A	#N/A	rp
FAUX	297.07002@1.435-rp	#N/A	297.07	1.435	C4H12N9O5P	#N/A	#N/A	rp
FAUX	297.08932@2.957-rp	#N/A	297.089	2.957	C10H19NO7S	#N/A	Metabolic pathways;Biosynthesis of plant secondary metabolites;Other	rp
FAUX	5-methylthioadenosine@2.524-rp	5-methylthioadenosine	297.089	2.524	C11H15N5O3S	#N/A	Metabolic pathways;Biosynthesis of plant secondary metabolites;Other	rp
FAUX	5-methylthioadenosine@1.38-rp	5-methylthioadenosine	297.09	1.38	C11H15N5O3S	#N/A	Metabolic pathways;Biosynthesis of plant secondary metabolites;Other	rp
FAUX	5-methylthioadenosine@7.338-rp	5-methylthioadenosine	297.09	7.338	C11H15N5O3S	#N/A	Metabolic pathways;Biosynthesis of plant secondary metabolites;Other	rp
FAUX	297.10341@11.89-rp	#N/A	297.103	11.89	C7H19N7O2S2	#N/A	#N/A	rp
FAUX	298.10569@8.701-rp	#N/A	298.106	8.701	C9H15N8O2P	#N/A	#N/A	rp
FAUX	298.12065@10.372-rp	#N/A	298.121	10.372	C18H18O4	#N/A	#N/A	rp
FAUX	Nonadecanoicacid@23.204-rp	Nonadecanoicacid	298.287	23.204	C19H38O2	#N/A	#N/A	rp
FAUX	298.97135@1.766-rp	#N/A	298.971	1.766	C3H10NO11PS	#N/A	#N/A	rp
FAUX	298.97599@0.941-rp	#N/A	298.976	0.941	C6H5NO13	#N/A	#N/A	rp
FAUX	Phosphopantothenicacid@1.768-rp	Phosphopantothenicacid	299.077	1.768	C9H18NO8P	#N/A	Metabolic pathways;Other	rp
FAUX	299.25747@10.449-rp	#N/A	299.257	10.449	C16H33N3O2	#N/A	#N/A	rp
FAUX	3-dehydrosphinganine@14.929-rp	3-dehydrosphinganine	299.282	14.929	C18H37NO2	#N/A	Metabolic pathways;Other	rp
FAUX	299.93893@0.924-rp	#N/A	299.939	0.924	#N/A	#N/A	#N/A	rp
FAUX	300.00969@0.877-rp	#N/A	300.01	0.877	C6H9ClN4O8	#N/A	#N/A	rp
FAUX	300.07081@2.451-rp	#N/A	300.071	2.451	C10H20O6S2	#N/A	Metabolic pathways;Purine metabolism	rp
FAUX	300.07089@4.532-rp	#N/A	300.071	4.532	C11H8N8O3	#N/A	Metabolic pathways;Purine metabolism	rp
FAUX	300.071@3.247-rp	#N/A	300.071	3.247	C4H13N8O6P	#N/A	Metabolic pathways;Purine metabolism	rp
FAUX	300.10678@1.15-rp	#N/A	300.107	1.15	C10H20O10	#N/A	#N/A	rp
FAUX	4-oxoretinol@16.799-rp	4-oxoretinol	300.209	16.799	C20H28O2	#N/A	Metabolic pathways;Biosynthesis of secondary metabolites;Other	rp
FAUX	301.04702@1.129-rp	#N/A	301.047	1.129	C13H3N9O	#N/A	#N/A	rp
FAUX	301.04719@1.381-rp	#N/A	301.047	1.381	C8H17NO7P2	#N/A	#N/A	rp
FAUX	N-acetylgalactosamine-6-phosphate@1.081-rp	N-acetylgalactosamine-6-phosphate	301.056	1.081	C8H16NO9P	#N/A	Metabolic pathways;Other	rp
FAUX	301.09147@1.712-rp	#N/A	301.091	1.712	C7H20ClN7S2	#N/A	#N/A	rp
FAUX	301.11403@3.015-rp	#N/A	301.114	3.015	C11H20N5OPS	#N/A	#N/A	rp
FAUX	301.15243@3.058-rp	#N/A	301.152	3.058	C9H20N9OP	#N/A	#N/A	rp
FAUX	301.15257@4.677-rp	#N/A	301.153	4.677	C14H23NO6	#N/A	#N/A	rp
FAUX	Sphinganine@15.152-rp	Sphinganine	301.298	15.152	C18H39NO2	#N/A	Metabolic pathways;Other	rp
FAUX	Sphinganine@15.303-rp	Sphinganine	301.298	15.303	C18H39NO2	#N/A	Metabolic pathways;Other	rp
FAUX	302.00575@0.897-rp	#N/A	302.006	0.897	C8H7N4O7P	#N/A	#N/A	rp
FAUX	302.0078@0.888-rp	#N/A	302.008	0.888	C7H8N6O4P2	#N/A	#N/A	rp
FAUX	302.03419@0.81-rp	#N/A	302.034	0.81	C10H12ClN4O3P	#N/A	#N/A	rp
FAUX	302.05967@1.12-rp	#N/A	302.06	1.12	#N/A	#N/A	#N/A	rp
FAUX	302.06409@3.119-rp	#N/A	302.064	3.119	C12H14O9	#N/A	#N/A	rp
FAUX	302.20955@13.083-rp	#N/A	302.21	13.083	C16H30O5	#N/A	#N/A	rp
FAUX	Eicosapentaenoicacid@17.798-rp	Eicosapentaenoicacid	302.224	17.798	C20H30O2	4941649	Metabolic pathways;Biosynthesis of secondary metabolites;Other	rp
FAUX	302.22433@12.645-rp	#N/A	302.224	12.645	C14H31N4OP	#N/A	Metabolic pathways;Biosynthesis of secondary metabolites;Other	rp
FAUX	Isopimaricacid@13.002-rp	Isopimaricacid	302.224	13.002	C20H30O2	#N/A	Metabolic pathways;Biosynthesis of secondary metabolites;Other	rp
FAUX	Eicosapentaenoicacid@19.593-rp	Eicosapentaenoicacid	302.225	19.593	C20H30O2	4941649	Metabolic pathways;Biosynthesis of secondary metabolites;Other	rp
FAUX	303.06254@1.008-rp	#N/A	303.063	1.008	C8H19NO7P2	#N/A	#N/A	rp
FAUX	303.1681@5.045-rp	#N/A	303.168	5.045	C14H25NO6	#N/A	#N/A	rp
FAUX	303.93446@0.921-rp	#N/A	303.934	0.921	C3H7N4O5P3S	#N/A	#N/A	rp
FAUX	303.99371@0.926-rp	#N/A	303.994	0.926	C7H4N4O10	#N/A	#N/A	rp
FAUX	304.01983@1.129-rp	#N/A	304.02	1.129	C11H15O4P3	#N/A	#N/A	rp
FAUX	304.02029@0.923-rp	#N/A	304.02	0.923	C9H9ClN4O6	#N/A	#N/A	rp
FAUX	304.02569@7.866-rp	#N/A	304.026	7.866	C11H12O8S	#N/A	#N/A	rp
FAUX	304.09874@8.557-rp	#N/A	304.099	8.557	C14H16N4O2S	#N/A	#N/A	rp
FAUX	Nopaline@1.058-rp	Nopaline	304.138	1.058	C11H20N4O6	413	ABC transporters;Other	rp
FAUX	304.14604@9.501-rp	#N/A	304.146	9.501	C13H24N2O4S	#N/A	#N/A	rp
FAUX	Arachidonicacid@20.312-rp	Arachidonicacid	304.24	20.312	C20H32O2	392692	Metabolic pathways;Biosynthesis of secondary metabolites;Other	rp
FAUX	304.92851@1.026-rp	#N/A	304.929	1.026	C4H7ClN3O5P3	#N/A	#N/A	rp
FAUX	304.96082@1.437-rp	#N/A	304.961	1.437	C3H3N3O14	#N/A	#N/A	rp
FAUX	304.99581@2.96-rp	#N/A	304.996	2.96	C8H7N3O8S	#N/A	#N/A	rp
FAUX	304.99611@2.198-rp	#N/A	304.996	2.198	C6H12NO9PS	#N/A	#N/A	rp
FAUX	305.06841@1.256-rp	#N/A	305.068	1.256	#N/A	#N/A	#N/A	rp
FAUX	305.06867@1.432-rp	#N/A	305.069	1.432	C6H15N3O11	#N/A	#N/A	rp
FAUX	305.07813@1.008-rp	#N/A	305.078	1.008	C9H15N5O5S	#N/A	#N/A	rp
FAUX	305.10479@3.5-rp	#N/A	305.105	3.5	C11H19N3O5S	#N/A	#N/A	rp
FAUX	305.11867@11.826-rp	#N/A	305.119	11.826	C6H19N5O9	#N/A	#N/A	rp
FAUX	305.12214@1.096-rp	#N/A	305.122	1.096	C5H20N7O6P	#N/A	#N/A	rp
FAUX	305.51662@1.647-rp	#N/A	305.517	1.647	#N/A	#N/A	#N/A	rp
FAUX	305.5714@1.427-rp	#N/A	305.571	1.427	#N/A	#N/A	#N/A	rp
FAUX	306.03055@0.9-rp	#N/A	306.031	0.9	C6H17N2O6P3	#N/A	Microbial metabolism in diverse environments;Other	rp
FAUX	306.03624@2.428-rp	#N/A	306.036	2.428	C10H16N2O3P2S	#N/A	#N/A	rp
FAUX	306.0413@7.266-rp	#N/A	306.041	7.266	C12H10N4O4S	#N/A	#N/A	rp
FAUX	306.05268@1.835-rp	#N/A	306.053	1.835	C10H14N2O7S	#N/A	Other	rp
FAUX	306.05805@3.25-rp	#N/A	306.058	3.25	C11H14O10	#N/A	#N/A	rp
FAUX	306.07174@1.067-rp	#N/A	306.072	1.067	C8H19O10P	#N/A	#N/A	rp
FAUX	306.07613@1.301-rp	#N/A	306.076	1.301	#N/A	#N/A	#N/A	rp
FAUX	306.08862@3.548-rp	#N/A	306.089	3.548	C11H18N2O6S	#N/A	#N/A	rp
FAUX	306.18289@12.152-rp	#N/A	306.183	12.152	C18H26O4	#N/A	#N/A	rp
FAUX	306.18318@13.905-rp	#N/A	306.183	13.905	C18H26O4	#N/A	#N/A	rp
FAUX	Dihomo-linolenicacid@20.893-rp	Dihomo-linolenicacid	306.256	20.893	C20H34O2	#N/A	Metabolic pathways;Biosynthesis of secondary metabolites;Other	rp
FAUX	Dihomo-linolenicacid@21.161-rp	Dihomo-linolenicacid	306.256	21.161	C20H34O2	#N/A	Metabolic pathways;Biosynthesis of secondary metabolites;Other	rp
FAUX	307.06641@1.716-rp	#N/A	307.066	1.716	C7H18NO10P	#N/A	#N/A	rp
FAUX	Glutathione@1.273-rp	Glutathione	307.084	1.273	C10H17N3O6S	111188	Metabolic pathways;ABC transporters;Bile secretion;Other	rp
FAUX	307.09017@1.093-rp	#N/A	307.09	1.093	C12H21NO4S2	#N/A	#N/A	rp
FAUX	307.09199@1.089-rp	#N/A	307.092	1.089	#N/A	#N/A	#N/A	rp
FAUX	307.12593@1.733-rp	#N/A	307.126	1.733	#N/A	#N/A	#N/A	rp
FAUX	308.04688@1.386-rp	#N/A	308.047	1.386	C6H19N2O6P3	#N/A	#N/A	rp
FAUX	308.05105@1.062-rp	#N/A	308.051	1.062	C6H16N2O10S	#N/A	#N/A	rp
FAUX	308.08043@1.015-rp	#N/A	308.08	1.015	C9H18N4O4P2	#N/A	#N/A	rp
FAUX	308.10115@7.351-rp	#N/A	308.101	7.351	C14H16N2O6	#N/A	#N/A	rp
FAUX	308.12159@1.033-rp	#N/A	308.122	1.033	C8H20N8OS2	#N/A	#N/A	rp
FAUX	308.1463@1.708-rp	#N/A	308.146	1.708	C13H24O8	#N/A	#N/A	rp
FAUX	308.23475@20.04-rp	#N/A	308.235	20.04	C19H32O3	#N/A	#N/A	rp
FAUX	308.23513@13.332-rp	#N/A	308.235	13.332	C19H32O3	#N/A	#N/A	rp
FAUX	Eicosadienoicacid@21.715-rp	Eicosadienoicacid	308.272	21.715	C20H36O2	#N/A	Biosynthesis of secondary metabolites;Other	rp
FAUX	308.99241@2.323-rp	#N/A	308.992	2.323	C8H5N7O3P2	#N/A	#N/A	rp
FAUX	309.06332@1.424-rp	#N/A	309.063	1.424	C10H11N7O3S	#N/A	#N/A	rp
FAUX	309.07942@1.208-rp	#N/A	309.079	1.208	C13H17N3O2P2	#N/A	#N/A	rp
FAUX	309.0894@3.384-rp	#N/A	309.089	3.384	C11H21NO5P2	#N/A	#N/A	rp
FAUX	N-acetylneuraminicacid@1.071-rp	N-acetylneuraminicacid	309.106	1.071	C11H19NO9	#N/A	Metabolic pathways;Other	rp
FAUX	310.09429@1.033-rp	#N/A	310.094	1.033	C5H16N10O2P2	#N/A	#N/A	rp
FAUX	310.11128@6.233-rp	#N/A	310.111	6.233	C7H21N8P3	#N/A	#N/A	rp
FAUX	310.11191@0.883-rp	#N/A	310.112	0.883	C11H25N2O2P3	#N/A	#N/A	rp
FAUX	Gamma-glutamyltyrosine@2.778-rp	Gamma-glutamyltyrosine	310.116	2.778	C14H18N2O6	#N/A	#N/A	rp
FAUX	310.12663@6.845-rp	#N/A	310.127	6.845	C13H18N4O5	#N/A	#N/A	rp
FAUX	13(S)-HPOT@12.652-rp	13(S)-HPOT	310.214	12.652	C18H30O4	#N/A	Metabolic pathways;Biosynthesis of secondary metabolites;alpha-Linolenic acid metabolism	rp
FAUX	11-eicosenoicacid@22.668-rp	11-eicosenoicacid	310.287	22.668	C20H38O2	#N/A	Other	rp
FAUX	311.53823@1.379-rp	#N/A	311.538	1.379	#N/A	#N/A	#N/A	rp
FAUX	311.53847@1.142-rp	#N/A	311.538	1.142	#N/A	#N/A	#N/A	rp
FAUX	312.02197@0.929-rp	#N/A	312.022	0.929	C5H9N6O8P	#N/A	Other	rp
FAUX	(5S,8R)-DiHODE@17.187-rp	(5S,8R)-DiHODE	312.23	17.187	C18H32O4	#N/A	Metabolic pathways;Biosynthesis of secondary metabolites;alpha-Linolenic acid metabolism;Cutin, suberine and wax biosynthesis;Other	rp
FAUX	(5S,8R)-DiHODE@15.975-rp	(5S,8R)-DiHODE	312.23	15.975	C18H32O4	#N/A	Metabolic pathways;Biosynthesis of secondary metabolites;alpha-Linolenic acid metabolism;Cutin, suberine and wax biosynthesis;Other	rp
FAUX	(5S,8R)-DiHODE@17.658-rp	(5S,8R)-DiHODE	312.23	17.658	C18H32O4	#N/A	Metabolic pathways;Biosynthesis of secondary metabolites;alpha-Linolenic acid metabolism;Cutin, suberine and wax biosynthesis;Other	rp
FAUX	(5S,8R)-DiHODE@15.754-rp	(5S,8R)-DiHODE	312.23	15.754	C18H32O4	#N/A	Metabolic pathways;Biosynthesis of secondary metabolites;alpha-Linolenic acid metabolism;Cutin, suberine and wax biosynthesis;Other	rp
FAUX	(5S,8R)-DiHODE@17.876-rp	(5S,8R)-DiHODE	312.231	17.876	C18H32O4	#N/A	Metabolic pathways;Biosynthesis of secondary metabolites;alpha-Linolenic acid metabolism;Cutin, suberine and wax biosynthesis;Other	rp
FAUX	312.26613@16.269-rp	#N/A	312.266	16.269	C19H36O3	#N/A	#N/A	rp
FAUX	312.98401@0.928-rp	#N/A	312.984	0.928	C2H5N9O6P2	#N/A	#N/A	rp
FAUX	313.0836@2.081-rp	#N/A	313.084	2.081	C5H18N9OP3	#N/A	#N/A	rp
FAUX	314.12676@11.004-rp	#N/A	314.127	11.004	C15H23O5P	#N/A	#N/A	rp
FAUX	314.12689@12.719-rp	#N/A	314.127	12.719	C19H23PS	#N/A	#N/A	rp
FAUX	314.12692@12.453-rp	#N/A	314.127	12.453	C17H18N2O4	#N/A	#N/A	rp
FAUX	314.12709@11.492-rp	#N/A	314.127	11.492	C17H18N2O4	#N/A	#N/A	rp
FAUX	314.13004@9.217-rp	#N/A	314.13	9.217	C14H22N2O4S	#N/A	#N/A	rp
FAUX	314.24599@21.712-rp	#N/A	314.246	21.712	C19H30N4	#N/A	Cutin, suberine and wax biosynthesis;Other	rp
FAUX	12,13-DiHOME@15.61-rp	12,13-DiHOME	314.246	15.61	C18H34O4	8412123	Cutin, suberine and wax biosynthesis;Other	rp
FAUX	315.07185@1.45-rp	#N/A	315.072	1.45	C4H15N9O4P2	#N/A	#N/A	rp
FAUX	315.16826@6.58-rp	#N/A	315.168	6.58	C15H25NO6	#N/A	#N/A	rp
FAUX	315.16827@6.369-rp	#N/A	315.168	6.369	C15H25NO6	#N/A	#N/A	rp
FAUX	315.24098@12.269-rp	#N/A	315.241	12.269	C18H29N5	#N/A	#N/A	rp
FAUX	315.91291@0.928-rp	#N/A	315.913	0.928	C5H2ClN2O10P	#N/A	#N/A	rp
FAUX	316.09098@1.703-rp	#N/A	316.091	1.703	C14H23O2P3	#N/A	#N/A	rp
FAUX	15-deoxy-delta-12,14-PGJ2@16.935-rp	15-deoxy-delta-12,14-PGJ2	316.204	16.935	C20H28O3	#N/A	Metabolic pathways;Biosynthesis of secondary metabolites;Biosynthesis of plant hormones;Other	rp
FAUX	317.06735@1.463-rp	#N/A	317.067	1.463	C13H22NP3S	#N/A	#N/A	rp
FAUX	317.12397@1.046-rp	#N/A	317.124	1.046	C10H24NO8P	#N/A	#N/A	rp
FAUX	317.18396@6.995-rp	#N/A	317.184	6.995	C15H27NO6	#N/A	#N/A	rp
FAUX	317.98879@0.973-rp	#N/A	317.989	0.973	C5H14ClN6P3S	#N/A	#N/A	rp
FAUX	318.05912@1.984-rp	#N/A	318.059	1.984	C12H14O10	#N/A	#N/A	rp
FAUX	318.07013@1.719-rp	#N/A	318.07	1.719	C4H14N8O7S	#N/A	#N/A	rp
FAUX	318.08095@2.436-rp	#N/A	318.081	2.436	C4H15N8O7P	#N/A	#N/A	rp
FAUX	318.10594@2.079-rp	#N/A	318.106	2.079	C12H18N2O8	#N/A	#N/A	rp
FAUX	318.12899@4.974-rp	#N/A	318.129	4.974	C12H23N4O2PS	#N/A	#N/A	rp
FAUX	318.14192@1.448-rp	#N/A	318.142	1.448	C17H24N2P2	#N/A	#N/A	rp
FAUX	12-HEPE@14.115-rp	12-HEPE	318.22	14.115	C20H30O3	#N/A	Metabolic pathways;Biosynthesis of secondary metabolites;Other	rp
FAUX	12-HEPE@13.975-rp	12-HEPE	318.22	13.975	C20H30O3	#N/A	Metabolic pathways;Biosynthesis of secondary metabolites;Other	rp
FAUX	12-HEPE@16.794-rp	12-HEPE	318.22	16.794	C20H30O3	#N/A	Metabolic pathways;Biosynthesis of secondary metabolites;Other	rp
FAUX	12-HEPE@17.078-rp	12-HEPE	318.22	17.078	C20H30O3	#N/A	Metabolic pathways;Biosynthesis of secondary metabolites;Other	rp
FAUX	12-HEPE@18.15-rp	12-HEPE	318.22	18.15	C20H30O3	#N/A	Metabolic pathways;Biosynthesis of secondary metabolites;Other	rp
FAUX	12-HEPE@17.847-rp	12-HEPE	318.22	17.847	C20H30O3	#N/A	Metabolic pathways;Biosynthesis of secondary metabolites;Other	rp
FAUX	319.05739@1.016-rp	#N/A	319.057	1.016	#N/A	#N/A	#N/A	rp
FAUX	319.06687@1.066-rp	#N/A	319.067	1.066	C9H14N5O6P	#N/A	#N/A	rp
FAUX	319.08404@1.445-rp	#N/A	319.084	1.445	C12H13N7O2S	#N/A	#N/A	rp
FAUX	319.16291@1.905-rp	#N/A	319.163	1.905	C14H25NO7	#N/A	#N/A	rp
FAUX	319.53543@1.38-rp	#N/A	319.535	1.38	#N/A	#N/A	#N/A	rp
FAUX	319.96746@0.935-rp	#N/A	319.967	0.935	C10H8O8S2	#N/A	#N/A	rp
FAUX	320.02902@12.565-rp	#N/A	320.029	12.565	C14H12N2O3S2	#N/A	#N/A	rp
FAUX	320.05114@1.078-rp	#N/A	320.051	1.078	C8H17O11P	#N/A	#N/A	rp
FAUX	320.07444@1.457-rp	#N/A	320.074	1.457	C7H13N8O5P	#N/A	#N/A	rp
FAUX	11(R)-HETE@17.798-rp	11(R)-HETE	320.235	17.798	C20H32O3	4446292	Metabolic pathways;Other	rp
FAUX	11(R)-HETE@17.548-rp	11(R)-HETE	320.235	17.548	C20H32O3	4446292	Metabolic pathways;Other	rp
FAUX	320.54393@1.38-rp	#N/A	320.544	1.38	#N/A	#N/A	#N/A	rp
FAUX	321.06281@1.309-rp	#N/A	321.063	1.309	C6H13N9O3P2	#N/A	#N/A	rp
FAUX	321.07307@1.013-rp	#N/A	321.073	1.013	C8H21NO8P2	#N/A	#N/A	rp
FAUX	Homoglutathione@1.786-rp	Homoglutathione	321.099	1.786	C11H19N3O6S	#N/A	#N/A	rp
FAUX	Homoglutathione@1.476-rp	Homoglutathione	321.099	1.476	C11H19N3O6S	#N/A	#N/A	rp
FAUX	322.00453@0.904-rp	#N/A	322.005	0.904	C9H13N2O5P3	#N/A	#N/A	rp
FAUX	322.05156@11.324-rp	#N/A	322.052	11.324	C15H14O6S	#N/A	#N/A	rp
FAUX	322.05643@2.05-rp	#N/A	322.056	2.05	C13H6N8O3	#N/A	Metabolic pathways;Other	rp
FAUX	322.07118@1.431-rp	#N/A	322.071	1.431	C8H16N6O4P2	#N/A	#N/A	rp
FAUX	322.17812@15.419-rp	#N/A	322.178	15.419	C19H22N4O	#N/A	#N/A	rp
FAUX	322.25091@18.017-rp	#N/A	322.251	18.017	C20H34O3	#N/A	#N/A	rp
FAUX	3-CMP@1.126-rp	3-CMP	323.052	1.126	C9H14N3O8P	#N/A	Metabolic pathways;Other	rp
FAUX	323.07893@1.431-rp	#N/A	323.079	1.431	#N/A	#N/A	#N/A	rp
FAUX	323.07909@1.3-rp	#N/A	323.079	1.3	#N/A	#N/A	#N/A	rp
FAUX	3-UMP@1.388-rp	3-UMP	324.036	1.388	C9H13N2O9P	#N/A	Metabolic pathways;Other	rp
FAUX	3-UMP@1.241-rp	3-UMP	324.036	1.241	C9H13N2O9P	#N/A	Metabolic pathways;Other	rp
FAUX	324.04903@2.261-rp	#N/A	324.049	2.261	C6H18N2O9P2	#N/A	#N/A	rp
FAUX	324.10007@2.109-rp	#N/A	324.1	2.109	C13H17N4O4P	#N/A	Biosynthesis of secondary metabolites;Other	rp
FAUX	324.10525@1.074-rp	#N/A	324.105	1.074	C10H23N4O2P3	#N/A	#N/A	rp
FAUX	324.1941@13.107-rp	#N/A	324.194	13.107	C18H28O5	#N/A	#N/A	rp
FAUX	324.9887@2.323-rp	#N/A	324.989	2.323	C5H14NO9P3	#N/A	#N/A	rp
FAUX	325.07997@3.199-rp	#N/A	325.08	3.199	C15H11N5O4	#N/A	#N/A	rp
FAUX	325.10104@1.064-rp	#N/A	325.101	1.064	C12H15N5O6	#N/A	Other	rp
FAUX	325.22572@12.948-rp	#N/A	325.226	12.948	C19H27N5	#N/A	Other	rp
FAUX	326.05962@1.703-rp	#N/A	326.06	1.703	C4H15ClN6O9	#N/A	#N/A	rp
FAUX	326.07289@1.714-rp	#N/A	326.073	1.714	C9H10N8O6	#N/A	#N/A	rp
FAUX	326.13274@0.994-rp	#N/A	326.133	0.994	C11H22N2O9	#N/A	#N/A	rp
FAUX	326.13664@8.072-rp	#N/A	326.137	8.072	C13H14N10O	#N/A	#N/A	rp
FAUX	2,3-Dinor-8-isoPGF2a@14.945-rp	2,3-Dinor-8-isoPGF2a	326.21	14.945	C18H30O5	#N/A	Other	rp
FAUX	326.22436@17.591-rp	#N/A	326.224	17.591	C22H30O2	#N/A	#N/A	rp
FAUX	3-methylthiopropyldesulfoglucosinolate@2.779-rp	3-methylthiopropyldesulfoglucosinolate	327.081	2.779	C11H21NO6S2	#N/A	Biosynthesis of secondary metabolites;2-Oxocarboxylic acid metabolism;Other	rp
FAUX	327.13164@2.118-rp	#N/A	327.132	2.118	C15H21NO7	#N/A	#N/A	rp
FAUX	327.92892@0.937-rp	#N/A	327.929	0.937	C3H3N6O7P3	#N/A	#N/A	rp
FAUX	327.99617@1.078-rp	#N/A	327.996	1.078	C8H5N6O7P	#N/A	#N/A	rp
FAUX	2,3-Dinor-8-isoPGF1a@13.859-rp	2,3-Dinor-8-isoPGF1a	328.225	13.859	C18H32O5	#N/A	Other	rp
FAUX	Docosahexaenoicacid@20.271-rp	Docosahexaenoicacid	328.24	20.271	C22H32O2	393183	Other	rp
FAUX	329.05267@3.962-rp	#N/A	329.053	3.962	C9H16NO10P	#N/A	Metabolic pathways;Purine metabolism;Bile secretion;Other	rp
FAUX	329.06525@1.314-rp	#N/A	329.065	1.314	C8H21N5OP2S2	#N/A	#N/A	rp
FAUX	329.07019@1.767-rp	#N/A	329.07	1.767	C6H18N7O3P3	#N/A	#N/A	rp
FAUX	330.16817@11.236-rp	#N/A	330.168	11.236	C17H22N4O3	#N/A	Other	rp
FAUX	330.16821@10.932-rp	#N/A	330.168	10.932	C16H26O7	#N/A	Other	rp
FAUX	330.1978@11.279-rp	#N/A	330.198	11.279	C18H27N4P	#N/A	#N/A	rp
FAUX	9,10,13-TriHOME@12.722-rp	9,10,13-TriHOME	330.241	12.722	C18H34O5	#N/A	Other	rp
FAUX	Docosapentaenoicacid@20.961-rp	Docosapentaenoicacid	330.256	20.961	C22H34O2	4942831	Biosynthesis of secondary metabolites;Other	rp
FAUX	Docosapentaenoicacid@20.692-rp	Docosapentaenoicacid	330.256	20.692	C22H34O2	4942831	Biosynthesis of secondary metabolites;Other	rp
FAUX	331.04045@1.385-rp	#N/A	331.04	1.385	C3H10N9O8P	#N/A	#N/A	rp
FAUX	331.0406@1.448-rp	#N/A	331.041	1.448	C7H14N3O10P	#N/A	#N/A	rp
FAUX	331.06736@1.429-rp	#N/A	331.067	1.429	C4H15N9O5P2	#N/A	Metabolic pathways;Purine metabolism	rp
FAUX	331.06806@2.188-rp	#N/A	331.068	2.188	C12H18ClN5S2	#N/A	Metabolic pathways;Purine metabolism	rp
FAUX	331.13818@2.773-rp	#N/A	331.138	2.773	C14H17N7O3	#N/A	#N/A	rp
FAUX	331.13865@1.515-rp	#N/A	331.139	1.515	C6H23N9O3P2	#N/A	#N/A	rp
FAUX	331.16289@2.654-rp	#N/A	331.163	2.654	C15H25NO7	#N/A	#N/A	rp
FAUX	331.16298@4.03-rp	#N/A	331.163	4.03	C16H21N5O3	#N/A	#N/A	rp
FAUX	331.16332@2.93-rp	#N/A	331.163	2.93	C16H29NO2S2	#N/A	#N/A	rp
FAUX	331.23614@10.275-rp	#N/A	331.236	10.275	C17H33NO5	#N/A	#N/A	rp
FAUX	331.58191@5.216-rp	#N/A	331.582	5.216	#N/A	#N/A	#N/A	rp
FAUX	331.88679@0.931-rp	#N/A	331.887	0.931	C4H4ClN4O4P3S	#N/A	#N/A	rp
FAUX	332.05256@2.105-rp	#N/A	332.053	2.105	C19H13N2PS	#N/A	Purine metabolism;Other	rp
FAUX	332.13299@1.519-rp	#N/A	332.133	1.519	C12H20N4O7	#N/A	#N/A	rp
FAUX	332.19902@13.931-rp	#N/A	332.199	13.931	C21H24N4	#N/A	Metabolic pathways;Biosynthesis of secondary metabolites;Other	rp
FAUX	Adrenicacid@21.402-rp	Adrenicacid	332.272	21.402	C22H36O2	#N/A	Other	rp
FAUX	332.53169@1.442-rp	#N/A	332.532	1.442	#N/A	#N/A	#N/A	rp
FAUX	332.97637@0.801-rp	#N/A	332.976	0.801	C6H11N3O7S3	#N/A	#N/A	rp
FAUX	333.03723@1.403-rp	#N/A	333.037	1.403	C8H17NO9P2	#N/A	#N/A	rp
FAUX	333.11774@2.41-rp	#N/A	333.118	2.41	C6H20N7O7P	#N/A	#N/A	rp
FAUX	333.12526@9.746-rp	#N/A	333.125	9.746	C15H19N5O2S	#N/A	#N/A	rp
FAUX	333.17848@3.187-rp	#N/A	333.178	3.187	C15H27NO7	#N/A	#N/A	rp
FAUX	333.17859@3.644-rp	#N/A	333.179	3.644	C15H27NO7	#N/A	#N/A	rp
FAUX	333.2151@7.744-rp	#N/A	333.215	7.744	C16H31NO6	#N/A	#N/A	rp
FAUX	333.96303@0.975-rp	#N/A	333.963	0.975	C7H12ClN2O5PS2	#N/A	#N/A	rp
FAUX	334.01523@10.408-rp	#N/A	334.015	10.408	C15H10O7S	#N/A	#N/A	rp
FAUX	334.01549@10.582-rp	#N/A	334.015	10.582	C15H10O7S	#N/A	#N/A	rp
FAUX	334.01567@7.996-rp	#N/A	334.016	7.996	C15H10O7S	#N/A	#N/A	rp
FAUX	NMN@1.141-rp	NMN	334.056	1.141	C11H15N2O8P	#N/A	Metabolic pathways;Other	rp
FAUX	334.05691@1.636-rp	#N/A	334.057	1.636	C9H18O11S	#N/A	Metabolic pathways;Other	rp
FAUX	334.06681@1.047-rp	#N/A	334.067	1.047	C8H18N2O10S	#N/A	#N/A	rp
FAUX	334.10162@1.712-rp	#N/A	334.102	1.712	C13H14N6O5	#N/A	#N/A	rp
FAUX	334.12832@1.01-rp	#N/A	334.128	1.01	C7H24N6O5P2	#N/A	#N/A	rp
FAUX	334.22946@13.537-rp	#N/A	334.229	13.537	C24H30O	#N/A	#N/A	rp
FAUX	335.05008@0.904-rp	#N/A	335.05	0.904	#N/A	#N/A	#N/A	rp
FAUX	335.07011@1.081-rp	#N/A	335.07	1.081	C21H9N3O2	#N/A	#N/A	rp
FAUX	335.07916@1.424-rp	#N/A	335.079	1.424	C9H22NO8PS	#N/A	Metabolic pathways;Microbial metabolism in diverse environments;Other	rp
FAUX	335.08804@1.032-rp	#N/A	335.088	1.032	C5H19N7O6P2	#N/A	#N/A	rp
FAUX	335.09685@1.716-rp	#N/A	335.097	1.716	#N/A	#N/A	#N/A	rp
FAUX	335.64352@4.101-rp	#N/A	335.644	4.101	#N/A	#N/A	#N/A	rp
FAUX	335.94167@0.944-rp	#N/A	335.942	0.944	C4HN8O7PS	#N/A	#N/A	rp
FAUX	336.03093@10.4-rp	#N/A	336.031	10.4	C15H12O7S	#N/A	#N/A	rp
FAUX	336.04817@1.558-rp	#N/A	336.048	1.558	C7H18N2O9P2	#N/A	Metabolic pathways;Other	rp
FAUX	336.06731@13.68-rp	#N/A	336.067	13.68	C16H16O6S	#N/A	#N/A	rp
FAUX	336.0777@2.629-rp	#N/A	336.078	2.629	C7H12N8O8	#N/A	#N/A	rp
FAUX	336.22797@19.84-rp	#N/A	336.228	19.84	C16H28N6O2	#N/A	#N/A	rp
FAUX	11(R)-HPETE@15.484-rp	11(R)-HPETE	336.231	15.484	C20H32O4	7827809	Metabolic pathways;Bile secretion;Other	rp
FAUX	336.23067@15.23-rp	#N/A	336.231	15.23	C21H28N4	#N/A	Metabolic pathways;Bile secretion;Other	rp
FAUX	336.2449@12.61-rp	#N/A	336.245	12.61	C24H32O	#N/A	#N/A	rp
FAUX	336.2451@11.792-rp	#N/A	336.245	11.792	C18H33N4P	#N/A	#N/A	rp
FAUX	336.26642@15.745-rp	#N/A	336.266	15.745	C21H36O3	#N/A	#N/A	rp
FAUX	337.06111@1.766-rp	#N/A	337.061	1.766	C8H15N7O4S2	#N/A	#N/A	rp
FAUX	337.08013@7.091-rp	#N/A	337.08	7.091	C15H15NO8	#N/A	#N/A	rp
FAUX	S-hydroxymethylglutathione@1.244-rp	S-hydroxymethylglutathione	337.093	1.244	C11H19N3O7S	394301	Metabolic pathways;Microbial metabolism in diverse environments;Other	rp
FAUX	337.09456@1.431-rp	#N/A	337.095	1.431	C5H20N7O6PS	#N/A	Metabolic pathways;Microbial metabolism in diverse environments;Other	rp
FAUX	337.89529@0.922-rp	#N/A	337.895	0.922	C4H9N2O4P3S3	#N/A	#N/A	rp
FAUX	337.97857@0.907-rp	#N/A	337.979	0.907	C8H7N2O11P	#N/A	#N/A	rp
FAUX	338.03322@1.906-rp	#N/A	338.033	1.906	C4H16N6O6P2S	#N/A	#N/A	rp
FAUX	338.04634@11.302-rp	#N/A	338.046	11.302	C5H15N4O11P	#N/A	#N/A	rp
FAUX	338.04932@1.431-rp	#N/A	338.049	1.431	C6H11N8O7P	#N/A	#N/A	rp
FAUX	5-phosphoribosylimidazole-4-aceticacid@2.028-rp	5-phosphoribosylimidazole-4-aceticacid	338.052	2.028	C10H15N2O9P	#N/A	Histidine metabolism	rp
FAUX	338.06289@1.431-rp	#N/A	338.063	1.431	C8H14N6O7S	#N/A	Metabolic pathways;Biosynthesis of secondary metabolites;Biosynthesis of plant secondary metabolites;Purine metabolism;Histidine metabolism;Other	rp
FAUX	338.09016@1.319-rp	#N/A	338.09	1.319	C6H16N10O3P2	#N/A	#N/A	rp
FAUX	338.11607@3.382-rp	#N/A	338.116	3.382	C13H18N6O3S	#N/A	Biosynthesis of secondary metabolites;Other	rp
FAUX	11,12-DHET@14.344-rp	11,12-DHET	338.246	14.344	C20H34O4	#N/A	Metabolic pathways;Biosynthesis of secondary metabolites;Other	rp
FAUX	338.24629@15.985-rp	#N/A	338.246	15.985	C14H35N4O3P	#N/A	Metabolic pathways;Biosynthesis of secondary metabolites;Other	rp
FAUX	339.0558@1.433-rp	#N/A	339.056	1.433	C12H16N5OP3	#N/A	Metabolic pathways;Microbial metabolism in diverse environments;Other	rp
FAUX	339.05776@1.434-rp	#N/A	339.058	1.434	C9H18N5O3PS2	#N/A	Metabolic pathways;Microbial metabolism in diverse environments;Other	rp
FAUX	339.07376@1.31-rp	#N/A	339.074	1.31	C10H17N3O8S	#N/A	#N/A	rp
FAUX	339.07496@5.926-rp	#N/A	339.075	5.926	C12H24NO2P3S	#N/A	#N/A	rp
FAUX	339.20463@15.71-rp	#N/A	339.205	15.71	C18H29NO5	#N/A	#N/A	rp
FAUX	340.03111@1.388-rp	#N/A	340.031	1.388	C20H10N2P2	#N/A	#N/A	rp
FAUX	340.05961@1.436-rp	#N/A	340.06	1.436	C5H15N10O2P3	#N/A	Metabolic pathways;Biosynthesis of secondary metabolites;Other	rp
FAUX	3-ketosucrose@1.07-rp	3-ketosucrose	340.101	1.07	C12H20O11	#N/A	Other	rp
FAUX	340.24014@13.282-rp	#N/A	340.24	13.282	C23H32O2	#N/A	#N/A	rp
FAUX	340.29749@17.565-rp	#N/A	340.297	17.565	C21H40O3	#N/A	#N/A	rp
FAUX	340.90537@1.025-rp	#N/A	340.905	1.025	C3H9ClN5O2PS4	#N/A	#N/A	rp
FAUX	341.05775@0.887-rp	#N/A	341.058	0.887	C10H15NO12	#N/A	#N/A	rp
FAUX	341.0751@1.808-rp	#N/A	341.075	1.808	C15H11N5O5	#N/A	#N/A	rp
FAUX	341.12349@1.744-rp	#N/A	341.123	1.744	C23H19NS	#N/A	#N/A	rp
FAUX	341.13234@1.081-rp	#N/A	341.132	1.081	C12H23NO10	#N/A	#N/A	rp
FAUX	342.012@1.085-rp	#N/A	342.012	1.085	C9H7N6O7P	#N/A	#N/A	rp
FAUX	342.03345@0.926-rp	#N/A	342.033	0.926	C12H10N2O10	#N/A	#N/A	rp
FAUX	342.03761@1.708-rp	#N/A	342.038	1.708	C11H21O4P3S	#N/A	#N/A	rp
FAUX	342.04673@1.709-rp	#N/A	342.047	1.709	C10H11N6O6P	#N/A	#N/A	rp
FAUX	342.08129@2.455-rp	#N/A	342.081	2.455	C6H15N8O7P	#N/A	#N/A	rp
FAUX	342.08736@1.611-rp	#N/A	342.087	1.611	C8H21N6O3P3	#N/A	#N/A	rp
FAUX	342.09566@6.857-rp	#N/A	342.096	6.857	C16H24O2P2S	#N/A	#N/A	rp
FAUX	342.11645@1.063-rp	#N/A	342.116	1.063	C13H18N4O7	#N/A	Metabolic pathways;Biosynthesis of secondary metabolites;ABC transporters;Other	rp
FAUX	342.20471@13.902-rp	#N/A	342.205	13.902	C18H30O6	#N/A	#N/A	rp
FAUX	342.21982@18.118-rp	#N/A	342.22	18.118	C22H30O3	#N/A	#N/A	rp
FAUX	342.21993@18.454-rp	#N/A	342.22	18.454	C22H30O3	#N/A	#N/A	rp
FAUX	342.25585@13.335-rp	#N/A	342.256	13.335	C23H34O2	#N/A	#N/A	rp
FAUX	342.25585@14.979-rp	#N/A	342.256	14.979	C23H34O2	#N/A	#N/A	rp
FAUX	342.25598@15.274-rp	#N/A	342.256	15.274	C17H35N4OP	#N/A	#N/A	rp
FAUX	342.25611@13.864-rp	#N/A	342.256	13.864	C23H34O2	#N/A	#N/A	rp
FAUX	343.01828@8.275-rp	#N/A	343.018	8.275	C12H9NO11	#N/A	#N/A	rp
FAUX	343.10204@1.712-rp	#N/A	343.102	1.712	C11H22NO9P	#N/A	#N/A	rp
FAUX	343.11306@4.298-rp	#N/A	343.113	4.298	C10H22N3O8P	#N/A	#N/A	rp
FAUX	343.13994@1.64-rp	#N/A	343.14	1.64	C11H25N3O7S	#N/A	#N/A	rp
FAUX	343.56548@1.409-rp	#N/A	343.565	1.409	#N/A	#N/A	#N/A	rp
FAUX	343.57484@7.027-rp	#N/A	343.575	7.027	#N/A	#N/A	#N/A	rp
FAUX	343.57512@6.075-rp	#N/A	343.575	6.075	#N/A	#N/A	#N/A	rp
FAUX	343.90287@0.934-rp	#N/A	343.903	0.934	C4H2N4O9P2S	#N/A	#N/A	rp
FAUX	343.97379@0.892-rp	#N/A	343.974	0.892	C3H10N10P2S3	#N/A	#N/A	rp
FAUX	344.02757@1.081-rp	#N/A	344.028	1.081	C7H14N4O8P2	#N/A	#N/A	rp
FAUX	344.04478@0.811-rp	#N/A	344.045	0.811	#N/A	#N/A	#N/A	rp
FAUX	344.05754@1.437-rp	#N/A	344.058	1.437	C7H8N10O7	#N/A	#N/A	rp
FAUX	344.08601@2.32-rp	#N/A	344.086	2.32	C7H17N6O8P	#N/A	#N/A	rp
FAUX	344.14769@8.064-rp	#N/A	344.148	8.064	C16H24O8	#N/A	#N/A	rp
FAUX	344.14769@9.15-rp	#N/A	344.148	9.15	C16H24O8	#N/A	#N/A	rp
FAUX	344.14772@7.022-rp	#N/A	344.148	7.022	C17H20N4O4	#N/A	#N/A	rp
FAUX	344.14772@8.469-rp	#N/A	344.148	8.469	C17H20N4O4	#N/A	#N/A	rp
FAUX	344.14774@7.297-rp	#N/A	344.148	7.297	C16H24O8	#N/A	#N/A	rp
FAUX	344.16008@15.71-rp	#N/A	344.16	15.71	C17H31OP3	#N/A	#N/A	rp
FAUX	11-dehydrocorticosterone@13.008-rp	11-dehydrocorticosterone	344.199	13.008	C21H28O4	#N/A	Other	rp
FAUX	344.23542@17.587-rp	#N/A	344.235	17.587	C22H32O3	#N/A	#N/A	rp
FAUX	344.25689@13.351-rp	#N/A	344.257	13.351	C20H32N4O	#N/A	#N/A	rp
FAUX	345.04006@1.232-rp	#N/A	345.04	1.232	C7H15N5O7S2	#N/A	#N/A	rp
FAUX	2,3-cGMP@1.557-rp	2,3-cGMP	345.049	1.557	C10H12N5O7P	#N/A	Metabolic pathways;Biosynthesis of secondary metabolites;Purine metabolism;Bile secretion;Other	rp
FAUX	345.14274@1.902-rp	#N/A	345.143	1.902	#N/A	#N/A	#N/A	rp
FAUX	346.09504@1.312-rp	#N/A	346.095	1.312	C10H23N2O7PS	#N/A	#N/A	rp
FAUX	346.11714@7.667-rp	#N/A	346.117	7.667	C19H25P3	#N/A	Biosynthesis of secondary metabolites;Other	rp
FAUX	346.14865@1.909-rp	#N/A	346.149	1.909	C8H27N8OPS2	#N/A	#N/A	rp
FAUX	11-deoxycortisol@13.364-rp	11-deoxycortisol	346.214	13.364	C21H30O4	#N/A	Metabolic pathways;Other	rp
FAUX	346.21489@14.31-rp	#N/A	346.215	14.31	C22H26N4	#N/A	Metabolic pathways;Other	rp
FAUX	346.23579@12.651-rp	#N/A	346.236	12.651	C18H34O6	#N/A	#N/A	rp
FAUX	346.23594@13.366-rp	#N/A	346.236	13.366	C18H34O6	#N/A	#N/A	rp
FAUX	347.05892@1.59-rp	#N/A	347.059	1.59	#N/A	#N/A	#N/A	rp
FAUX	2-AMP@7.475-rp	2-AMP	347.063	7.475	C10H14N5O7P	#N/A	Metabolic pathways;Biosynthesis of secondary metabolites;Biosynthesis of plant secondary metabolites;Purine metabolism;Biosynthesis of plant hormones;Other	rp
FAUX	2-AMP@1.57-rp	2-AMP	347.063	1.57	C10H14N5O7P	#N/A	Metabolic pathways;Biosynthesis of secondary metabolites;Biosynthesis of plant secondary metabolites;Purine metabolism;Biosynthesis of plant hormones;Other	rp
FAUX	347.06307@6.074-rp	#N/A	347.063	6.074	C11H10N9O3P	#N/A	Metabolic pathways;Biosynthesis of secondary metabolites;Biosynthesis of plant secondary metabolites;Purine metabolism;Biosynthesis of plant hormones;Other	rp
FAUX	347.08238@1.002-rp	#N/A	347.082	1.002	C5H19N9O3P2S	#N/A	#N/A	rp
FAUX	347.13106@1.737-rp	#N/A	347.131	1.737	C7H22N7O7P	#N/A	#N/A	rp
FAUX	347.13279@1.724-rp	#N/A	347.133	1.724	C15H26NO4PS	#N/A	#N/A	rp
FAUX	347.26733@12.713-rp	#N/A	347.267	12.713	C19H33N5O	#N/A	#N/A	rp
FAUX	347.98286@0.938-rp	#N/A	347.983	0.938	C7H14Cl2N6S3	#N/A	#N/A	rp
FAUX	348.00643@1.008-rp	#N/A	348.006	1.008	C5H13N6O6PS2	#N/A	#N/A	rp
FAUX	IMP@1.515-rp	IMP	348.048	1.515	C10H13N4O8P	#N/A	Metabolic pathways;Biosynthesis of secondary metabolites;Biosynthesis of plant secondary metabolites;Purine metabolism;Biosynthesis of plant hormones;Other	rp
FAUX	348.08236@1.085-rp	#N/A	348.082	1.085	C5H18N8O6P2	#N/A	#N/A	rp
FAUX	348.117@1.692-rp	#N/A	348.117	1.692	C13H20N2O9	#N/A	#N/A	rp
FAUX	348.15358@8.331-rp	#N/A	348.154	8.331	C14H24N2O8	#N/A	#N/A	rp
FAUX	348.22997@12.238-rp	#N/A	348.23	12.238	C15H33N4O3P	#N/A	Other	rp
FAUX	349.05011@1.514-rp	#N/A	349.05	1.514	C3H12N9O9P	#N/A	#N/A	rp
FAUX	349.07699@1.014-rp	#N/A	349.077	1.014	#N/A	#N/A	#N/A	rp
FAUX	349.09434@1.994-rp	#N/A	349.094	1.994	C10H24NO8PS	#N/A	Other	rp
FAUX	349.0944@4.675-rp	#N/A	349.094	4.675	C6H22N7O4P3	#N/A	Metabolic pathways;Biosynthesis of secondary metabolites;Other	rp
FAUX	349.09452@6.407-rp	#N/A	349.095	6.407	C10H24NO8PS	#N/A	Other	rp
FAUX	349.09453@2.546-rp	#N/A	349.095	2.546	C13H15N7O3S	#N/A	Other	rp
FAUX	349.09481@8.276-rp	#N/A	349.095	8.276	C13H15N7O3S	#N/A	Other	rp
FAUX	349.97832@0.94-rp	#N/A	349.978	0.94	C5H4ClN10O5P	#N/A	#N/A	rp
FAUX	349.98024@0.926-rp	#N/A	349.98	0.926	C5H8N10OP2S2	#N/A	#N/A	rp
FAUX	349.99406@0.913-rp	#N/A	349.994	0.913	C7H8N6O7P2	#N/A	#N/A	rp
FAUX	350.01015@11.495-rp	#N/A	350.01	11.495	C16H6N4O4S	#N/A	#N/A	rp
FAUX	350.0102@11.7-rp	#N/A	350.01	11.7	C15H10O8S	#N/A	#N/A	rp
FAUX	350.01027@8.79-rp	#N/A	350.01	8.79	C10H7N8O3PS	#N/A	#N/A	rp
FAUX	350.05169@2.106-rp	#N/A	350.052	2.106	C12H11N6O5P	#N/A	#N/A	rp
FAUX	350.06177@1.065-rp	#N/A	350.062	1.065	C12H10N6O7	#N/A	#N/A	rp
FAUX	350.08422@2.473-rp	#N/A	350.084	2.473	C18H16N4P2	#N/A	#N/A	rp
FAUX	350.21001@12.054-rp	#N/A	350.21	12.054	C21H26N4O	#N/A	#N/A	rp
FAUX	350.56229@4.681-rp	#N/A	350.562	4.681	#N/A	#N/A	#N/A	rp
FAUX	351.01326@11.501-rp	#N/A	351.013	11.501	C9H5N9O5S	#N/A	#N/A	rp
FAUX	351.9728@0.909-rp	#N/A	351.973	0.909	C6H14N2O7P2S2	#N/A	#N/A	rp
FAUX	351.97597@0.917-rp	#N/A	351.976	0.917	C6H8O17	#N/A	#N/A	rp
FAUX	352.06436@1.198-rp	#N/A	352.064	1.198	C13H12N4O8	#N/A	Metabolic pathways;Other	rp
FAUX	352.07727@1.046-rp	#N/A	352.077	1.046	C10H17N4O8P	#N/A	Other	rp
FAUX	352.10527@1.477-rp	#N/A	352.105	1.477	C11H20N4O7S	#N/A	#N/A	rp
FAUX	352.12647@1.672-rp	#N/A	352.126	1.672	C16H20N2O7	#N/A	#N/A	rp
FAUX	352.14019@1.906-rp	#N/A	352.14	1.906	C17H27N2P3	#N/A	#N/A	rp
FAUX	352.22276@12.726-rp	#N/A	352.223	12.726	C17H39OP3	#N/A	Metabolic pathways;Biosynthesis of secondary metabolites;Bile secretion;Other	rp
FAUX	352.22536@13.039-rp	#N/A	352.225	13.039	C13H34N6OP2	#N/A	Metabolic pathways;Biosynthesis of secondary metabolites;Bile secretion;Other	rp
FAUX	352.24009@13.538-rp	#N/A	352.24	13.538	C24H32O2	#N/A	#N/A	rp
FAUX	352.24034@13.84-rp	#N/A	352.24	13.84	C24H32O2	#N/A	#N/A	rp
FAUX	353.07112@2.55-rp	#N/A	353.071	2.55	C12H23N3OS4	#N/A	#N/A	rp
FAUX	353.0793@2.113-rp	#N/A	353.079	2.113	C13H15N5O5S	#N/A	#N/A	rp
FAUX	353.95252@0.91-rp	#N/A	353.953	0.91	C5H4N6O9P2	#N/A	#N/A	rp
FAUX	354.06677@1.425-rp	#N/A	354.067	1.425	C6H22ClN6O3P3	#N/A	#N/A	rp
FAUX	354.069@1.384-rp	#N/A	354.069	1.384	C6H20N4O9P2	#N/A	#N/A	rp
FAUX	354.07537@0.909-rp	#N/A	354.075	0.909	C11H20N2O7P2	#N/A	#N/A	rp
FAUX	354.08105@1.1-rp	#N/A	354.081	1.1	C7H15N8O7P	#N/A	#N/A	rp
FAUX	354.1528@7.463-rp	#N/A	354.153	7.463	C11H18N10O4	#N/A	#N/A	rp
FAUX	354.24089@14.328-rp	#N/A	354.241	14.328	C14H35N4O4P	#N/A	Metabolic pathways;Bile secretion;Other	rp
FAUX	11,12,15-THETA@16.432-rp	11,12,15-THETA	354.241	16.432	C20H34O5	10128338	Metabolic pathways;Bile secretion;Other	rp
FAUX	354.25562@14.306-rp	#N/A	354.256	14.306	C24H34O2	#N/A	#N/A	rp
FAUX	354.25581@13.333-rp	#N/A	354.256	13.333	C24H34O2	#N/A	#N/A	rp
FAUX	354.25595@13.865-rp	#N/A	354.256	13.865	C24H34O2	#N/A	#N/A	rp
FAUX	354.25597@11.824-rp	#N/A	354.256	11.824	C17H34N6S	#N/A	#N/A	rp
FAUX	354.25612@12.696-rp	#N/A	354.256	12.696	C24H34O2	#N/A	#N/A	rp
FAUX	354.27648@19.159-rp	#N/A	354.276	19.159	C21H38O4	#N/A	#N/A	rp
FAUX	355.03415@1.015-rp	#N/A	355.034	1.015	C5H13N3O15	#N/A	#N/A	rp
FAUX	355.07977@1.061-rp	#N/A	355.08	1.061	C10H18N3O9P	#N/A	#N/A	rp
FAUX	Amino-phosphoribitylamino-uracil@1.43-rp	Amino-phosphoribitylamino-uracil	356.073	1.43	C9H17N4O9P	#N/A	Metabolic pathways;Biosynthesis of secondary metabolites;Other	rp
FAUX	356.08169@3.509-rp	#N/A	356.082	3.509	C13H18N4O4P2	#N/A	#N/A	rp
FAUX	356.09578@1.061-rp	#N/A	356.096	1.061	C13H16N4O8	#N/A	#N/A	rp
FAUX	356.14772@10.857-rp	#N/A	356.148	10.857	C10H24N6O6S	#N/A	#N/A	rp
FAUX	356.27146@13.009-rp	#N/A	356.271	13.009	C24H36O2	#N/A	#N/A	rp
FAUX	356.27147@16.218-rp	#N/A	356.271	16.218	C24H36O2	#N/A	#N/A	rp
FAUX	356.27154@14.999-rp	#N/A	356.272	14.999	C18H37N4OP	#N/A	#N/A	rp
FAUX	1-oleoylglycerol@20.08-rp	1-oleoylglycerol	356.292	20.08	C21H40O4	#N/A	#N/A	rp
FAUX	357.00163@1.725-rp	#N/A	357.002	1.725	C4H10N9O5P3	#N/A	#N/A	rp
FAUX	357.11153@7.338-rp	#N/A	357.112	7.338	C14H15N9OS	#N/A	Metabolic pathways;Biosynthesis of secondary metabolites;Other	rp
FAUX	357.22675@10.232-rp	#N/A	357.227	10.232	C17H31N3O5	#N/A	#N/A	rp
FAUX	358.00688@1.075-rp	#N/A	358.007	1.075	C6H14O15S	#N/A	#N/A	rp
FAUX	358.00784@0.941-rp	#N/A	358.008	0.941	C4H12N10O2P2S2	#N/A	#N/A	rp
FAUX	358.01@1.713-rp	#N/A	358.01	1.713	C8H8N8O5P2	#N/A	#N/A	rp
FAUX	358.03898@1.765-rp	#N/A	358.039	1.765	C10H14O14	#N/A	#N/A	rp
FAUX	358.04153@1.388-rp	#N/A	358.042	1.388	C4H12N10O6P2	#N/A	#N/A	rp
FAUX	358.09005@3.939-rp	#N/A	358.09	3.939	C19H20O3P2	#N/A	#N/A	rp
FAUX	Phosphopantetheine@3.514-rp	Phosphopantetheine	358.097	3.514	C11H23N2O7PS	103123	Metabolic pathways;Biosynthesis of secondary metabolites;Other	rp
FAUX	358.11138@1.038-rp	#N/A	358.111	1.038	C15H23N2O4PS	#N/A	#N/A	rp
FAUX	358.19595@1.677-rp	#N/A	358.196	1.677	C14H26N6O5	#N/A	#N/A	rp
FAUX	358.25089@12.762-rp	#N/A	358.251	12.762	C23H34O3	#N/A	#N/A	rp
FAUX	358.25091@12.33-rp	#N/A	358.251	12.33	C23H34O3	#N/A	#N/A	rp
FAUX	358.28733@21.853-rp	#N/A	358.287	21.853	C18H39N4OP	#N/A	#N/A	rp
FAUX	359.10823@4.299-rp	#N/A	359.108	4.299	C11H21NO12	#N/A	#N/A	rp
FAUX	359.14248@1.057-rp	#N/A	359.142	1.057	C7H22N9O6P	#N/A	#N/A	rp
FAUX	359.19461@6.691-rp	#N/A	359.195	6.691	C17H29NO7	#N/A	#N/A	rp
FAUX	359.26728@12.149-rp	#N/A	359.267	12.149	C20H33N5O	#N/A	#N/A	rp
FAUX	359.94908@0.896-rp	#N/A	359.949	0.896	C4H11N8P3S3	#N/A	#N/A	rp
FAUX	360.02233@0.804-rp	#N/A	360.022	0.804	C12H8N8O2S2	#N/A	#N/A	rp
FAUX	360.08078@1.695-rp	#N/A	360.081	1.695	C14H12N6O6	#N/A	#N/A	rp
FAUX	360.09197@2.453-rp	#N/A	360.092	2.453	C10H21N2O10P	#N/A	#N/A	rp
FAUX	360.10607@1.86-rp	#N/A	360.106	1.86	C16H16N4O6	#N/A	#N/A	rp
FAUX	360.13238@9.1-rp	#N/A	360.132	9.1	C20H27P3	#N/A	Other	rp
FAUX	Betaxanthin@10.596-rp	Betaxanthin	360.132	10.596	C18H20N2O6	#N/A	Other	rp
FAUX	360.22796@19.595-rp	#N/A	360.228	19.595	C17H32N2O6	#N/A	#N/A	rp
FAUX	360.26642@15.902-rp	#N/A	360.266	15.902	C23H36O3	#N/A	#N/A	rp
FAUX	360.26644@16.078-rp	#N/A	360.266	16.078	C23H36O3	#N/A	#N/A	rp
FAUX	361.07728@1.562-rp	#N/A	361.077	1.562	C5H17N9O6P2	#N/A	#N/A	rp
FAUX	361.07883@2.874-rp	#N/A	361.079	2.874	C12H12N9O3P	#N/A	#N/A	rp
FAUX	361.09445@2.208-rp	#N/A	361.094	2.208	C14H15N7O3S	#N/A	#N/A	rp
FAUX	361.09448@1.939-rp	#N/A	361.094	1.939	C9H17N9O3P2	#N/A	#N/A	rp
FAUX	361.09452@3.641-rp	#N/A	361.095	3.641	C14H15N7O3S	#N/A	#N/A	rp
FAUX	361.11255@1.715-rp	#N/A	361.113	1.715	C11H24NO10P	#N/A	#N/A	rp
FAUX	361.17371@9.149-rp	#N/A	361.174	9.149	C16H27NO8	#N/A	#N/A	rp
FAUX	361.17376@8.069-rp	#N/A	361.174	8.069	C17H23N5O4	#N/A	#N/A	rp
FAUX	361.17388@8.469-rp	#N/A	361.174	8.469	C11H24N9O3P	#N/A	#N/A	rp
FAUX	361.51332@2.129-rp	#N/A	361.513	2.129	#N/A	#N/A	#N/A	rp
FAUX	362.08045@1.125-rp	#N/A	362.08	1.125	C8H17N10OP3	#N/A	#N/A	rp
FAUX	362.08138@1.559-rp	#N/A	362.081	1.559	#N/A	#N/A	#N/A	rp
FAUX	362.08997@1.435-rp	#N/A	362.09	1.435	C4H14N10O10	#N/A	#N/A	rp
FAUX	362.10561@0.995-rp	#N/A	362.106	0.995	C6H19N8O8P	#N/A	#N/A	rp
FAUX	362.15792@10.532-rp	#N/A	362.158	10.532	C16H26O9	#N/A	#N/A	rp
FAUX	362.20968@12.488-rp	#N/A	362.21	12.488	C22H26N4O	#N/A	Metabolic pathways;Bile secretion;Other	rp
FAUX	362.24352@20.359-rp	#N/A	362.244	20.359	C18H30N6O2	#N/A	#N/A	rp
FAUX	5a-acetoxy-10b,14b-dihydroxytaxadiene@16.111-rp	5a-acetoxy-10b,14b-dihydroxytaxadiene	362.246	16.111	C22H34O4	#N/A	Biosynthesis of secondary metabolites;Other	rp
FAUX	8-oxo-dGMP@1.487-rp	8-oxo-dGMP	363.058	1.487	C10H14N5O8P	394863	Metabolic pathways;Biosynthesis of plant secondary metabolites;Purine metabolism;Other	rp
FAUX	363.10931@1.483-rp	#N/A	363.109	1.483	C15H18N5O4P	#N/A	Metabolic pathways;Biosynthesis of secondary metabolites;Other	rp
FAUX	363.11003@3.652-rp	#N/A	363.11	3.652	C15H28NOP3S	#N/A	Metabolic pathways;Biosynthesis of secondary metabolites;Other	rp
FAUX	363.24483@17.927-rp	#N/A	363.245	17.927	C19H33N5S	#N/A	#N/A	rp
FAUX	363.95687@0.942-rp	#N/A	363.957	0.942	C8H11Cl3N4O4S	#N/A	#N/A	rp
FAUX	364.02592@10.771-rp	#N/A	364.026	10.771	C16H12O8S	#N/A	Other	rp
FAUX	364.04112@1.14-rp	#N/A	364.041	1.14	C9H17O13P	#N/A	Metabolic pathways;Biosynthesis of secondary metabolites;Biosynthesis of plant secondary metabolites;Purine metabolism;Other	rp
FAUX	364.04491@1.551-rp	#N/A	364.045	1.551	#N/A	#N/A	#N/A	rp
FAUX	364.09778@0.997-rp	#N/A	364.098	0.997	C12H21N4O5PS	#N/A	#N/A	rp
FAUX	364.10308@1.71-rp	#N/A	364.103	1.71	C7H22N6O7P2	#N/A	#N/A	rp
FAUX	364.10483@1.748-rp	#N/A	364.105	1.748	C11H26O9P2	#N/A	#N/A	rp
FAUX	364.1055@1.31-rp	#N/A	364.106	1.31	C10H25N2O8PS	#N/A	#N/A	rp
FAUX	364.11313@8.735-rp	#N/A	364.113	8.735	C14H24N2O5S2	#N/A	#N/A	rp
FAUX	364.12756@8.102-rp	#N/A	364.128	8.102	C12H17N10O2P	#N/A	#N/A	rp
FAUX	11b,17a,21-trihydroxy-5b-pregnane-3,20-dione@9.317-rp	11b,17a,21-trihydroxy-5b-pregnane-3,20-dione	364.225	9.317	C21H32O5	#N/A	Other	rp
FAUX	364.25908@21.293-rp	#N/A	364.259	21.293	C18H32N6O2	#N/A	#N/A	rp
FAUX	364.58007@7.013-rp	#N/A	364.58	7.013	#N/A	#N/A	#N/A	rp
FAUX	365.07404@4.296-rp	#N/A	365.074	4.296	C11H12N9O4P	#N/A	#N/A	rp
FAUX	365.0894@1.276-rp	#N/A	365.089	1.276	C13H15N7O4S	#N/A	Other	rp
FAUX	365.09538@2.626-rp	#N/A	365.095	2.626	C13H19NO11	#N/A	#N/A	rp
FAUX	365.12452@1.548-rp	#N/A	365.125	1.548	C9H19N9O5S	#N/A	#N/A	rp
FAUX	365.15062@2.233-rp	#N/A	365.151	2.233	C15H27NO7S	#N/A	#N/A	rp
FAUX	365.26266@21.307-rp	#N/A	365.263	21.307	C15H35N5O5	#N/A	#N/A	rp
FAUX	365.95378@0.951-rp	#N/A	365.954	0.951	C6H13ClN4O4P2S2	#N/A	#N/A	rp
FAUX	365.96796@0.916-rp	#N/A	365.968	0.916	C5H9N10P3S2	#N/A	#N/A	rp
FAUX	366.03922@0.861-rp	#N/A	366.039	0.861	C12H18N2O5S3	#N/A	#N/A	rp
FAUX	366.0486@2.454-rp	#N/A	366.049	2.454	C4H15N8O8PS	#N/A	#N/A	rp
FAUX	366.05795@2.446-rp	#N/A	366.058	2.446	C11H11N8O5P	#N/A	Metabolic pathways;Biosynthesis of secondary metabolites;Biosynthesis of plant secondary metabolites;Purine metabolism;Other	rp
FAUX	366.07922@3.25-rp	#N/A	366.079	3.25	C10H10N10O6	#N/A	#N/A	rp
FAUX	366.129@4.299-rp	#N/A	366.129	4.299	C8H19N10O5P	#N/A	#N/A	rp
FAUX	366.12913@9.149-rp	#N/A	366.129	9.149	C15H29O4P3	#N/A	#N/A	rp
FAUX	366.14259@1.853-rp	#N/A	366.143	1.853	C17H22N2O7	#N/A	#N/A	rp
FAUX	366.32778@22.197-rp	#N/A	366.328	22.197	C27H42	#N/A	#N/A	rp
FAUX	367.03317@1.023-rp	#N/A	367.033	1.023	C8H18NO11PS	#N/A	#N/A	rp
FAUX	367.0871@2.954-rp	#N/A	367.087	2.954	C13H17N7O2S2	#N/A	#N/A	rp
FAUX	367.09508@3.382-rp	#N/A	367.095	3.382	C12H22N3O6PS	#N/A	#N/A	rp
FAUX	367.94713@0.92-rp	#N/A	367.947	0.92	C6H14N2O6P2S3	#N/A	#N/A	rp
FAUX	367.95098@0.934-rp	#N/A	367.951	0.934	C4H11N4O8P3S	#N/A	#N/A	rp
FAUX	368.07207@1.067-rp	#N/A	368.072	1.067	C11H16N2O12	#N/A	#N/A	rp
FAUX	368.34428@28.108-rp	#N/A	368.344	28.108	C27H44	#N/A	#N/A	rp
FAUX	368.34453@25.916-rp	#N/A	368.345	25.916	C27H44	#N/A	#N/A	rp
FAUX	369.04428@1.589-rp	#N/A	369.044	1.589	C5H17N5O10P2	#N/A	#N/A	rp
FAUX	369.08464@1.71-rp	#N/A	369.085	1.71	C14H28NPS4	#N/A	#N/A	rp
FAUX	369.09544@1.049-rp	#N/A	369.095	1.049	C11H20N3O9P	#N/A	#N/A	rp
FAUX	369.98855@0.981-rp	#N/A	369.989	0.981	C9H13N2O8P3	#N/A	#N/A	rp
FAUX	370.02903@1.508-rp	#N/A	370.029	1.508	C6H20N4O6P2S2	#N/A	#N/A	rp
FAUX	370.03057@6.077-rp	#N/A	370.031	6.077	C5H16N4O11P2	#N/A	#N/A	rp
FAUX	370.04921@0.907-rp	#N/A	370.049	0.907	C14H16N2O6P2	#N/A	#N/A	rp
FAUX	370.10589@2.11-rp	#N/A	370.106	2.11	C13H18N6O5S	#N/A	Metabolic pathways;Biosynthesis of secondary metabolites;Other	rp
FAUX	370.25081@13.544-rp	#N/A	370.251	13.544	C24H34O3	#N/A	#N/A	rp
FAUX	370.25084@12.448-rp	#N/A	370.251	12.448	C24H34O3	#N/A	#N/A	rp
FAUX	370.25101@11.604-rp	#N/A	370.251	11.604	C24H34O3	#N/A	#N/A	rp
FAUX	370.25103@12.886-rp	#N/A	370.251	12.886	C24H34O3	#N/A	#N/A	rp
FAUX	370.2511@13.838-rp	#N/A	370.251	13.838	C24H34O3	#N/A	#N/A	rp
FAUX	371.07676@2.549-rp	#N/A	371.077	2.549	C11H24N3O3P3S	#N/A	#N/A	rp
FAUX	371.07691@8.279-rp	#N/A	371.077	8.279	C8H18N7O6PS	#N/A	#N/A	rp
FAUX	371.179@7.467-rp	#N/A	371.179	7.467	C14H29NO10	#N/A	#N/A	rp
FAUX	CarnitineC14:0@15.771-rp	CarnitineC14:0	371.304	15.771	C21H41NO4	#N/A	#N/A	rp
FAUX	371.53812@1.44-rp	#N/A	371.538	1.44	#N/A	#N/A	#N/A	rp
FAUX	371.58765@7.674-rp	#N/A	371.588	7.674	#N/A	#N/A	#N/A	rp
FAUX	372.02257@1.083-rp	#N/A	372.023	1.083	C6H17N2O12PS	#N/A	#N/A	rp
FAUX	372.10623@6.188-rp	#N/A	372.106	6.188	C16H20O10	#N/A	#N/A	rp
FAUX	372.11253@5.524-rp	#N/A	372.113	5.524	C12H25N2O7PS	#N/A	#N/A	rp
FAUX	372.20702@7.289-rp	#N/A	372.207	7.289	C10H28N8O7	#N/A	#N/A	rp
FAUX	372.25174@14.328-rp	#N/A	372.252	14.328	C21H32N4O2	#N/A	Metabolic pathways;Biosynthesis of secondary metabolites;Other	rp
FAUX	372.25181@12.481-rp	#N/A	372.252	12.481	C20H36O6	#N/A	Metabolic pathways;Biosynthesis of secondary metabolites;Other	rp
FAUX	372.26624@13.468-rp	#N/A	372.266	13.468	C24H36O3	#N/A	#N/A	rp
FAUX	372.26638@12.241-rp	#N/A	372.266	12.241	C24H36O3	#N/A	#N/A	rp
FAUX	372.26642@13.332-rp	#N/A	372.266	13.332	C24H36O3	#N/A	#N/A	rp
FAUX	372.26649@13.866-rp	#N/A	372.266	13.866	C24H36O3	#N/A	#N/A	rp
FAUX	372.2665@12.699-rp	#N/A	372.267	12.699	C24H36O3	#N/A	#N/A	rp
FAUX	372.2665@14.312-rp	#N/A	372.267	14.312	C24H36O3	#N/A	#N/A	rp
FAUX	373.09459@2.827-rp	#N/A	373.095	2.827	C16H26NOP3S	#N/A	Metabolic pathways;Biosynthesis of secondary metabolites;Other	rp
FAUX	373.0947@2.161-rp	#N/A	373.095	2.161	C15H17N7OP2	#N/A	Metabolic pathways;Biosynthesis of secondary metabolites;Other	rp
FAUX	373.24642@9.679-rp	#N/A	373.246	9.679	C20H31N5O2	#N/A	#N/A	rp
FAUX	373.26998@12.004-rp	#N/A	373.27	12.004	C17H35N5O4	#N/A	#N/A	rp
FAUX	373.2701@14.308-rp	#N/A	373.27	14.308	C16H36N7OP	#N/A	#N/A	rp
FAUX	374.01269@1.761-rp	#N/A	374.013	1.761	C19H2N8S	#N/A	#N/A	rp
FAUX	374.03663@1.385-rp	#N/A	374.037	1.385	C8H14N4O11S	#N/A	#N/A	rp
FAUX	374.09186@3.511-rp	#N/A	374.092	3.511	C14H16N8OP2	#N/A	#N/A	rp
FAUX	374.10755@2.321-rp	#N/A	374.108	2.321	C8H25N8OP3S	#N/A	#N/A	rp
FAUX	375.04361@0.996-rp	#N/A	375.044	0.996	C7H17N7O5S3	#N/A	#N/A	rp
FAUX	375.11646@3.94-rp	#N/A	375.116	3.94	C12H21N7O3S2	#N/A	#N/A	rp
FAUX	375.14393@8.589-rp	#N/A	375.144	8.589	C17H30NO2PS2	#N/A	#N/A	rp
FAUX	375.18917@3.736-rp	#N/A	375.189	3.736	C17H29NO8	#N/A	#N/A	rp
FAUX	375.18924@4.1-rp	#N/A	375.189	4.1	C21H31NOP2	#N/A	#N/A	rp
FAUX	375.92228@0.898-rp	#N/A	375.922	0.898	C8H5ClN8S4	#N/A	#N/A	rp
FAUX	376.13852@7.971-rp	#N/A	376.139	7.971	C18H16N8O2	#N/A	Metabolic pathways;Biosynthesis of secondary metabolites;ABC transporters;Other	rp
FAUX	376.26143@12.766-rp	#N/A	376.261	12.766	C23H36O4	#N/A	#N/A	rp
FAUX	377.01598@0.996-rp	#N/A	377.016	0.996	C3H7N9O13	#N/A	#N/A	rp
FAUX	377.0636@1.067-rp	#N/A	377.064	1.067	C10H21NO10P2	#N/A	#N/A	rp
FAUX	377.10676@1.716-rp	#N/A	377.107	1.716	C7H20N7O9P	#N/A	#N/A	rp
FAUX	377.10873@1.09-rp	#N/A	377.109	1.09	C6H21N9O6P2	#N/A	#N/A	rp
FAUX	377.12525@2.484-rp	#N/A	377.125	2.484	C8H24N7O6PS	#N/A	#N/A	rp
FAUX	378.0439@1.537-rp	#N/A	378.044	1.537	C6H16N6O9P2	#N/A	#N/A	rp
FAUX	378.07766@11.815-rp	#N/A	378.078	11.815	C15H10N10OS	#N/A	#N/A	rp
FAUX	378.09317@1.057-rp	#N/A	378.093	1.057	C13H19ClN4O7	#N/A	#N/A	rp
FAUX	378.20468@10.387-rp	#N/A	378.205	10.387	C16H27N8OP	#N/A	#N/A	rp
FAUX	378.23858@17.292-rp	#N/A	378.239	17.292	C18H40N2P2S	#N/A	#N/A	rp
FAUX	378.2775@15.272-rp	#N/A	378.277	15.272	C23H38O4	#N/A	Other	rp
FAUX	378.27756@13.933-rp	#N/A	378.278	13.933	C23H38O4	#N/A	Other	rp
FAUX	378.27763@14.973-rp	#N/A	378.278	14.973	C24H34N4	#N/A	Other	rp
FAUX	379.05275@1.559-rp	#N/A	379.053	1.559	C4H15N9O8P2	#N/A	#N/A	rp
FAUX	379.1046@1.446-rp	#N/A	379.105	1.446	C14H22NO9P	#N/A	Metabolic pathways;Other	rp
FAUX	379.10482@1.703-rp	#N/A	379.105	1.703	C14H17N7O4S	#N/A	Metabolic pathways;Other	rp
FAUX	379.10515@2.67-rp	#N/A	379.105	2.67	C11H26NO9PS	#N/A	Metabolic pathways;Other	rp
FAUX	379.989@0.935-rp	#N/A	379.989	0.935	C3H9N8O10PS	#N/A	#N/A	rp
FAUX	380.0717@0.989-rp	#N/A	380.072	0.989	C13H22N2O5P2S	#N/A	#N/A	rp
FAUX	380.07875@3.517-rp	#N/A	380.079	3.517	C15H26O3P2S2	#N/A	#N/A	rp
FAUX	380.08184@1.429-rp	#N/A	380.082	1.429	C13H23N2O5P3	#N/A	#N/A	rp
FAUX	380.25697@12.117-rp	#N/A	380.257	12.117	C23H32N4O	#N/A	#N/A	rp
FAUX	381.06927@2.624-rp	#N/A	381.069	2.624	C8H19N3O12S	#N/A	Metabolic pathways;Other	rp
FAUX	381.08454@2.545-rp	#N/A	381.085	2.545	C14H26NO3P3S	#N/A	Metabolic pathways;Biosynthesis of secondary metabolites;Other	rp
FAUX	381.12832@12.193-rp	#N/A	381.128	12.193	C15H27NO6S2	#N/A	#N/A	rp
FAUX	381.19197@10.602-rp	#N/A	381.192	10.602	C17H28N5O3P	#N/A	#N/A	rp
FAUX	381.9419@0.92-rp	#N/A	381.942	0.92	C10H2N6O7S2	#N/A	#N/A	rp
FAUX	382.01373@0.877-rp	#N/A	382.014	0.877	C12H18N2O4S4	#N/A	#N/A	rp
FAUX	382.04395@3.248-rp	#N/A	382.044	3.248	C20H15O4PS	#N/A	#N/A	rp
FAUX	382.0517@1.025-rp	#N/A	382.052	1.025	C4H16N8O9P2	#N/A	#N/A	rp
FAUX	382.053@1.529-rp	#N/A	382.053	1.529	C4H16N8O9P2	#N/A	#N/A	rp
FAUX	382.10838@0.995-rp	#N/A	382.108	0.995	C10H18N6O10	#N/A	#N/A	rp
FAUX	382.11766@1.029-rp	#N/A	382.118	1.029	C14H29N2O2P3S	#N/A	#N/A	rp
FAUX	Succinyladenosine@5.705-rp	Succinyladenosine	383.108	5.705	C14H17N5O8	17216022	#N/A	rp
FAUX	N-acetyllactosamine@1.113-rp	N-acetyllactosamine	383.142	1.113	C14H25NO11	#N/A	Other	rp
FAUX	S-adenosylhomocysteine@3.383-rp	S-adenosylhomocysteine	384.122	3.383	C14H20N6O5S	#N/A	Metabolic pathways;Biosynthesis of amino acids;Other	rp
FAUX	384.1273@1.13-rp	#N/A	384.127	1.13	C15H30O5P2S	#N/A	#N/A	rp
FAUX	384.22799@19.596-rp	#N/A	384.228	19.596	C20H28N6O2	#N/A	#N/A	rp
FAUX	384.26635@15.993-rp	#N/A	384.266	15.993	C25H36O3	#N/A	#N/A	rp
FAUX	5a-cholesta-7,24-dien-3b-ol@20.219-rp	5a-cholesta-7,24-dien-3b-ol	384.339	20.219	C27H44O	#N/A	Metabolic pathways;Biosynthesis of secondary metabolites;Microbial metabolism in diverse environments;Other	rp
FAUX	5a-cholesta-7,24-dien-3b-ol@22.198-rp	5a-cholesta-7,24-dien-3b-ol	384.339	22.198	C27H44O	#N/A	Metabolic pathways;Biosynthesis of secondary metabolites;Microbial metabolism in diverse environments;Other	rp
FAUX	5a-cholesta-7,24-dien-3b-ol@22.008-rp	5a-cholesta-7,24-dien-3b-ol	384.339	22.008	C27H44O	#N/A	Metabolic pathways;Biosynthesis of secondary metabolites;Microbial metabolism in diverse environments;Other	rp
FAUX	384.33928@23.642-rp	#N/A	384.339	23.642	C21H45N4P	#N/A	Metabolic pathways;Biosynthesis of secondary metabolites;Microbial metabolism in diverse environments;Other	rp
FAUX	385.04459@1.022-rp	#N/A	385.045	1.022	C9H16N5O8PS	#N/A	#N/A	rp
FAUX	385.10588@2.042-rp	#N/A	385.106	2.042	C16H26N3P3S	#N/A	Metabolic pathways;Biosynthesis of secondary metabolites;Other	rp
FAUX	386.02317@0.913-rp	#N/A	386.023	0.913	C10H20N4O2P2S3	#N/A	#N/A	rp
FAUX	387.04048@1.132-rp	#N/A	387.04	1.132	C12H24NO3P3S2	#N/A	#N/A	rp
FAUX	387.10286@1.463-rp	#N/A	387.103	1.463	C8H22N9O3PS2	#N/A	#N/A	rp
FAUX	387.11012@3.512-rp	#N/A	387.11	3.512	C19H23N3P2S	#N/A	#N/A	rp
FAUX	387.24476@17.534-rp	#N/A	387.245	17.534	C20H37NO4S	#N/A	#N/A	rp
FAUX	387.29863@13.777-rp	#N/A	387.299	13.777	C16H38N9P	#N/A	#N/A	rp
FAUX	388.03389@0.898-rp	#N/A	388.034	0.898	C14H9N6O6P	#N/A	#N/A	rp
FAUX	388.09665@1.128-rp	#N/A	388.097	1.128	C20H20O6S	#N/A	#N/A	rp
FAUX	388.14878@5.881-rp	#N/A	388.149	5.881	C16H24N2O9	#N/A	#N/A	rp
FAUX	388.21043@9.351-rp	#N/A	388.21	9.351	C19H32O8	#N/A	#N/A	rp
FAUX	388.26122@11.994-rp	#N/A	388.261	11.994	C25H32N4	#N/A	#N/A	rp
FAUX	388.26122@12.45-rp	#N/A	388.261	12.45	C24H36O4	#N/A	#N/A	rp
FAUX	388.26122@14.446-rp	#N/A	388.261	14.446	C25H32N4	#N/A	#N/A	rp
FAUX	388.26124@13.539-rp	#N/A	388.261	13.539	C24H36O4	#N/A	#N/A	rp
FAUX	388.2613@11.322-rp	#N/A	388.261	11.322	C18H37N4O3P	#N/A	#N/A	rp
FAUX	388.26142@12.886-rp	#N/A	388.261	12.886	C18H37N4O3P	#N/A	#N/A	rp
FAUX	388.26144@13.836-rp	#N/A	388.261	13.836	C25H32N4	#N/A	#N/A	rp
FAUX	388.26153@11.602-rp	#N/A	388.262	11.602	C18H37N4O3P	#N/A	#N/A	rp
FAUX	Oleoyltaurine@18.363-rp	Oleoyltaurine	389.26	18.363	C20H39NO4S	#N/A	#N/A	rp
FAUX	390.08674@3.513-rp	#N/A	390.087	3.513	C11H23N2O9PS	#N/A	#N/A	rp
FAUX	390.27666@14.306-rp	#N/A	390.277	14.306	C24H38O4	#N/A	#N/A	rp
FAUX	390.277@13.866-rp	#N/A	390.277	13.866	C24H38O4	#N/A	#N/A	rp
FAUX	391.14144@4.777-rp	#N/A	391.141	4.777	C17H32NOP3S	#N/A	#N/A	rp
FAUX	391.8986@0.901-rp	#N/A	391.899	0.901	C10H3ClN2O9P2	#N/A	#N/A	rp
FAUX	392.11511@0.888-rp	#N/A	392.115	0.888	C16H26O7P2	#N/A	Metabolic pathways;Biosynthesis of secondary metabolites;Biosynthesis of alkaloids derived from shikimate pathway;Other	rp
FAUX	392.25655@11.236-rp	#N/A	392.257	11.236	C23H36O5	#N/A	#N/A	rp
FAUX	12-epideoxycholicacid@14.998-rp	12-epideoxycholicacid	392.293	14.998	C24H40O4	#N/A	Metabolic pathways;Bile secretion;Other	rp
FAUX	392.29318@16.211-rp	#N/A	392.293	16.211	C25H36N4	#N/A	Metabolic pathways;Bile secretion;Other	rp
FAUX	392.29353@15.479-rp	#N/A	392.294	15.479	C25H36N4	#N/A	Metabolic pathways;Bile secretion;Other	rp
FAUX	392.57834@7.472-rp	#N/A	392.578	7.472	#N/A	#N/A	#N/A	rp
FAUX	393.096@2.458-rp	#N/A	393.096	2.458	C22H20NO2PS	#N/A	#N/A	rp
FAUX	393.12059@2.527-rp	#N/A	393.121	2.527	C16H30NO2P3S	#N/A	Metabolic pathways;Biosynthesis of secondary metabolites;Other	rp
FAUX	393.21909@11.512-rp	#N/A	393.219	11.512	C18H35NO6S	#N/A	#N/A	rp
FAUX	394.09802@5.524-rp	#N/A	394.098	5.524	C12H28O8P2S	#N/A	#N/A	rp
FAUX	394.23383@17.656-rp	#N/A	394.234	17.656	C20H35N4PS	#N/A	#N/A	rp
FAUX	394.27251@13.28-rp	#N/A	394.273	13.28	C23H38O5	#N/A	Metabolic pathways;Biosynthesis of secondary metabolites;Other	rp
FAUX	394.27258@12.765-rp	#N/A	394.273	12.765	C23H38O5	#N/A	Metabolic pathways;Biosynthesis of secondary metabolites;Other	rp
FAUX	394.27262@12.324-rp	#N/A	394.273	12.324	C23H38O5	#N/A	Metabolic pathways;Biosynthesis of secondary metabolites;Other	rp
FAUX	394.98719@0.925-rp	#N/A	394.987	0.925	C9H17ClNO8P3	#N/A	#N/A	rp
FAUX	395.16964@7.443-rp	#N/A	395.17	7.443	C18H25N3O7	#N/A	#N/A	rp
FAUX	395.96352@0.945-rp	#N/A	395.964	0.945	C3H4N6O17	#N/A	#N/A	rp
FAUX	396.16374@5.888-rp	#N/A	396.164	5.888	C11H25N8O6P	#N/A	#N/A	rp
FAUX	397.06332@1.573-rp	#N/A	397.063	1.573	#N/A	#N/A	#N/A	rp
FAUX	397.12372@5.845-rp	#N/A	397.124	5.845	C15H29NO5P2S	#N/A	#N/A	rp
FAUX	CarnitineC16:1@16.263-rp	CarnitineC16:1	397.319	16.263	C23H43NO4	#N/A	#N/A	rp
FAUX	397.91583@0.922-rp	#N/A	397.916	0.922	C6H13N2O6P3S3	#N/A	#N/A	rp
FAUX	S-adenosylmethionine@1.385-rp	S-adenosylmethionine	398.137	1.385	C15H22N6O5S	#N/A	Metabolic pathways;Biosynthesis of secondary metabolites;Biosynthesis of plant secondary metabolites;Biosynthesis of amino acids;Biosynthesis of plant hormones;Other	rp
FAUX	398.17921@7.909-rp	#N/A	398.179	7.909	C16H30O11	#N/A	#N/A	rp
FAUX	398.3185@16.077-rp	#N/A	398.318	16.077	C21H43N4OP	#N/A	#N/A	rp
FAUX	399.13712@1.024-rp	#N/A	399.137	1.024	C14H25NO12	#N/A	#N/A	rp
FAUX	399.33435@17.464-rp	#N/A	399.334	17.464	C24H41N5	#N/A	Other	rp
FAUX	399.98376@0.898-rp	#N/A	399.984	0.898	#N/A	#N/A	#N/A	rp
FAUX	400.10738@6.671-rp	#N/A	400.107	6.671	C17H27N2OP3S	#N/A	#N/A	rp
FAUX	400.12278@2.37-rp	#N/A	400.123	2.37	#N/A	#N/A	#N/A	rp
FAUX	26-hydroxycholest-4-en-3-one@22.193-rp	26-hydroxycholest-4-en-3-one	400.334	22.193	C27H44O2	#N/A	Metabolic pathways;Biosynthesis of secondary metabolites;Other	rp
FAUX	26-hydroxycholest-4-en-3-one@22.776-rp	26-hydroxycholest-4-en-3-one	400.334	22.776	C27H44O2	#N/A	Metabolic pathways;Biosynthesis of secondary metabolites;Other	rp
FAUX	401.99726@0.92-rp	#N/A	401.997	0.92	C6H15N2O14PS	#N/A	#N/A	rp
FAUX	402.00543@2.548-rp	#N/A	402.005	2.548	C7H14ClN8O4P3	#N/A	#N/A	rp
FAUX	402.03327@1.088-rp	#N/A	402.033	1.088	C5H12N10O8P2	#N/A	#N/A	rp
FAUX	402.13743@1.066-rp	#N/A	402.137	1.066	C9H23N8O8P	#N/A	#N/A	rp
FAUX	402.14811@1.085-rp	#N/A	402.148	1.085	C13H26N2O12	#N/A	#N/A	rp
FAUX	402.16448@7.335-rp	#N/A	402.164	7.335	C15H31O10P	#N/A	#N/A	rp
FAUX	402.18995@7.803-rp	#N/A	402.19	7.803	C20H26N4O5	#N/A	#N/A	rp
FAUX	404.00199@1.134-rp	#N/A	404.002	1.134	C7H19O13P3	#N/A	Metabolic pathways;Other	rp
FAUX	404.00248@1.403-rp	#N/A	404.002	1.403	C16H9N2O9P	#N/A	Metabolic pathways;Other	rp
FAUX	404.00777@0.901-rp	#N/A	404.008	0.901	C8H8N10O6S2	#N/A	#N/A	rp
FAUX	404.11911@2.381-rp	#N/A	404.119	2.381	C23H20N2O3S	#N/A	#N/A	rp
FAUX	404.22053@13.019-rp	#N/A	404.221	13.019	C20H24N10	#N/A	#N/A	rp
FAUX	404.25636@12.891-rp	#N/A	404.256	12.891	C24H36O5	#N/A	#N/A	rp
FAUX	404.2565@13.147-rp	#N/A	404.257	13.147	C25H32N4O	#N/A	#N/A	rp
FAUX	404.25654@10.725-rp	#N/A	404.257	10.725	C24H36O5	#N/A	#N/A	rp
FAUX	405.05092@1.361-rp	#N/A	405.051	1.361	C14H11N7O6S	#N/A	#N/A	rp
FAUX	405.05097@1.258-rp	#N/A	405.051	1.258	C11H15N7O6S2	#N/A	#N/A	rp
FAUX	405.06109@1.226-rp	#N/A	405.061	1.226	C10H20N3O10PS	#N/A	#N/A	rp
FAUX	405.0685@1.563-rp	#N/A	405.068	1.563	C11H20NO13P	#N/A	#N/A	rp
FAUX	405.12101@1.712-rp	#N/A	405.121	1.712	#N/A	#N/A	#N/A	rp
FAUX	405.15742@8.902-rp	#N/A	405.157	8.902	C14H32NO8PS	#N/A	#N/A	rp
FAUX	405.20066@7.998-rp	#N/A	405.201	7.998	C19H27N5O5	#N/A	#N/A	rp
FAUX	406.05285@1.298-rp	#N/A	406.053	1.298	C29H11OP	#N/A	#N/A	rp
FAUX	406.10398@3.384-rp	#N/A	406.104	3.384	C13H25N6OP3S	#N/A	#N/A	rp
FAUX	406.12263@1.718-rp	#N/A	406.123	1.718	#N/A	#N/A	#N/A	rp
FAUX	406.23622@13.363-rp	#N/A	406.236	13.363	C23H34O6	#N/A	#N/A	rp
FAUX	406.25722@12.098-rp	#N/A	406.257	12.098	C15H35N8O3P	#N/A	#N/A	rp
FAUX	406.27175@12.005-rp	#N/A	406.272	12.005	C25H34N4O	#N/A	#N/A	rp
FAUX	12-dehydrocholicacid@13.615-rp	12-dehydrocholicacid	406.272	13.615	C24H38O5	#N/A	#N/A	rp
FAUX	12-dehydrocholicacid@11.6-rp	12-dehydrocholicacid	406.272	11.6	C24H38O5	#N/A	#N/A	rp
FAUX	12-dehydrocholicacid@12.887-rp	12-dehydrocholicacid	406.272	12.887	C24H38O5	#N/A	#N/A	rp
FAUX	12-dehydrocholicacid@11.319-rp	12-dehydrocholicacid	406.272	11.319	C24H38O5	#N/A	#N/A	rp
FAUX	406.27224@14.447-rp	#N/A	406.272	14.447	C25H34N4O	#N/A	#N/A	rp
FAUX	12-dehydrocholicacid@13.539-rp	12-dehydrocholicacid	406.273	13.539	C24H38O5	#N/A	#N/A	rp
FAUX	406.27261@13.839-rp	#N/A	406.273	13.839	C25H34N4O	#N/A	#N/A	rp
FAUX	407.09955@1.439-rp	#N/A	407.1	1.439	C6H17N9O12	#N/A	#N/A	rp
FAUX	407.27643@13.83-rp	#N/A	407.276	13.83	#N/A	#N/A	#N/A	rp
FAUX	408.07721@1.427-rp	#N/A	408.077	1.427	C25H8N6O	#N/A	#N/A	rp
FAUX	408.08907@0.892-rp	#N/A	408.089	0.892	C8H20N6O11S	#N/A	#N/A	rp
FAUX	Alpha-muricholicacid@12.677-rp	Alpha-muricholicacid	408.288	12.677	C24H40O5	#N/A	Metabolic pathways;Bile secretion;Other	rp
FAUX	Alpha-muricholicacid@13.863-rp	Alpha-muricholicacid	408.288	13.863	C24H40O5	#N/A	Metabolic pathways;Bile secretion;Other	rp
FAUX	Alpha-muricholicacid@13.331-rp	Alpha-muricholicacid	408.288	13.331	C24H40O5	#N/A	Metabolic pathways;Bile secretion;Other	rp
FAUX	408.28809@13.47-rp	#N/A	408.288	13.47	C25H36N4O	#N/A	Metabolic pathways;Bile secretion;Other	rp
FAUX	Alpha-muricholicacid@14.312-rp	Alpha-muricholicacid	408.288	14.312	C24H40O5	#N/A	Metabolic pathways;Bile secretion;Other	rp
FAUX	409.09823@6.869-rp	#N/A	409.098	6.869	C14H23N3O7S2	#N/A	#N/A	rp
FAUX	409.14896@1.893-rp	#N/A	409.149	1.893	C16H28NO9P	#N/A	#N/A	rp
FAUX	409.22328@12.003-rp	#N/A	409.223	12.003	C25H31NO4	#N/A	#N/A	rp
FAUX	409.29128@13.861-rp	#N/A	409.291	13.861	C16H40N7O3P	#N/A	#N/A	rp
FAUX	409.29136@14.313-rp	#N/A	409.291	14.313	C16H40N7O3P	#N/A	#N/A	rp
FAUX	409.29138@13.331-rp	#N/A	409.291	13.331	C16H40N7O3P	#N/A	#N/A	rp
FAUX	409.29176@12.688-rp	#N/A	409.292	12.688	C16H40N7O3P	#N/A	#N/A	rp
FAUX	410.00257@0.886-rp	#N/A	410.003	0.886	C23H10N2S3	#N/A	#N/A	rp
FAUX	410.08345@1.047-rp	#N/A	410.083	1.047	#N/A	#N/A	#N/A	rp
FAUX	410.24363@20.268-rp	#N/A	410.244	20.268	C23H41P3	#N/A	#N/A	rp
FAUX	410.26753@11.237-rp	#N/A	410.268	11.237	C24H34N4O2	#N/A	#N/A	rp
FAUX	410.30306@17.157-rp	#N/A	410.303	17.157	C18H43N4O4P	#N/A	#N/A	rp
FAUX	411.00748@3.518-rp	#N/A	411.007	3.518	C3H11N9O11P2	#N/A	#N/A	rp
FAUX	411.13897@6.643-rp	#N/A	411.139	6.643	C15H25NO12	#N/A	#N/A	rp
FAUX	411.29833@13.278-rp	#N/A	411.298	13.278	C24H45NS2	#N/A	#N/A	rp
FAUX	412.05284@1.71-rp	#N/A	412.053	1.71	C6H23N8O3P3S2	#N/A	#N/A	rp
FAUX	412.09827@1.743-rp	#N/A	412.098	1.743	C15H27O7P3	#N/A	#N/A	rp
FAUX	412.11667@6.386-rp	#N/A	412.117	6.386	C15H22N6O4P2	#N/A	Metabolic pathways;Biosynthesis of secondary metabolites;Other	rp
FAUX	412.13403@7.004-rp	#N/A	412.134	7.004	C13H25N4O9P	#N/A	#N/A	rp
FAUX	412.18423@2.55-rp	#N/A	412.184	2.55	C20H24N6O4	#N/A	#N/A	rp
FAUX	412.25865@0.919-rp	#N/A	412.259	0.919	C14H38N8O2P2	#N/A	#N/A	rp
FAUX	412.29738@16.79-rp	#N/A	412.297	16.79	C20H40N6OS	#N/A	#N/A	rp
FAUX	412.29769@12.358-rp	#N/A	412.298	12.358	C27H40O3	#N/A	#N/A	rp
FAUX	CarnitineC16:1(OH)@14.45-rp	CarnitineC16:1(OH)	413.314	14.45	C23H43NO5	#N/A	#N/A	rp
FAUX	413.88973@0.925-rp	#N/A	413.89	0.925	C11H2ClN4O6P3	#N/A	#N/A	rp
FAUX	414.08822@1.392-rp	#N/A	414.088	1.392	C13H23N2O9PS	#N/A	#N/A	rp
FAUX	414.26252@12.389-rp	#N/A	414.263	12.389	C22H38O7	#N/A	#N/A	rp
FAUX	414.29859@19.158-rp	#N/A	414.299	19.158	C23H42O6	#N/A	#N/A	rp
FAUX	Diosgenin@14.786-rp	Diosgenin	414.313	14.786	C27H42O3	89870	Microbial metabolism in diverse environments;Biosynthesis of plant secondary metabolites;Other	rp
FAUX	415.0552@1.019-rp	#N/A	415.055	1.019	C10H18N5O9PS	#N/A	#N/A	rp
FAUX	415.10563@6.735-rp	#N/A	415.106	6.735	C17H27N3OP2S2	#N/A	Metabolic pathways;Biosynthesis of secondary metabolites;Other	rp
FAUX	415.20562@7.908-rp	#N/A	415.206	7.908	C16H33NO11	#N/A	#N/A	rp
FAUX	CarnitineC16:0(OH)@15.345-rp	CarnitineC16:0(OH)	415.33	15.345	C23H45NO5	#N/A	#N/A	rp
FAUX	416.14245@1.695-rp	#N/A	416.142	1.695	C22H20N6OS	#N/A	#N/A	rp
FAUX	416.23812@4.459-rp	#N/A	416.238	4.459	C18H28N10O2	#N/A	#N/A	rp
FAUX	416.25408@12.773-rp	#N/A	416.254	12.773	C22H43OP3	#N/A	#N/A	rp
FAUX	416.27785@14.341-rp	#N/A	416.278	14.341	C23H46P2S	#N/A	#N/A	rp
FAUX	416.31425@20.08-rp	#N/A	416.314	20.08	C24H40N4O2	#N/A	#N/A	rp
FAUX	3b-hydroxy-5-cholestenoicacid@14.246-rp	3b-hydroxy-5-cholestenoicacid	416.329	14.246	C27H44O3	#N/A	Metabolic pathways;Biosynthesis of secondary metabolites;Other	rp
FAUX	417.02365@1.719-rp	#N/A	417.024	1.719	C12H11N5O10S	#N/A	#N/A	rp
FAUX	417.14761@1.017-rp	#N/A	417.148	1.017	C14H27NO13	#N/A	#N/A	rp
FAUX	418.1271@9.837-rp	#N/A	418.127	9.837	C15H23N4O8P	#N/A	#N/A	rp
FAUX	418.20289@12.859-rp	#N/A	418.203	12.859	C24H36P2S	#N/A	#N/A	rp
FAUX	419.00813@0.991-rp	#N/A	419.008	0.991	C9H19N5O4P2S3	#N/A	#N/A	rp
FAUX	419.01246@1.395-rp	#N/A	419.012	1.395	C6H15N9O5P2S2	#N/A	#N/A	rp
FAUX	419.07652@1.207-rp	#N/A	419.077	1.207	C12H23NO11P2	#N/A	#N/A	rp
FAUX	419.09979@2.164-rp	#N/A	419.1	2.164	C17H28NO3P3S	#N/A	#N/A	rp
FAUX	419.09997@2.883-rp	#N/A	419.1	2.883	C17H28NO3P3S	#N/A	#N/A	rp
FAUX	419.17305@7.991-rp	#N/A	419.173	7.991	C18H25N7O3S	#N/A	#N/A	rp
FAUX	419.98171@0.903-rp	#N/A	419.982	0.903	C7H12N6O9S3	#N/A	#N/A	rp
FAUX	420.11444@2.413-rp	#N/A	420.114	2.413	C13H21N6O8P	#N/A	#N/A	rp
FAUX	420.13171@1.628-rp	#N/A	420.132	1.628	C11H30N6O3P2S2	#N/A	#N/A	rp
FAUX	421.09465@8.275-rp	#N/A	421.095	8.275	C16H24NO8PS	#N/A	#N/A	rp
FAUX	421.15223@7.031-rp	#N/A	421.152	7.031	C12H25N9O4P2	#N/A	#N/A	rp
FAUX	422.04054@6.23-rp	#N/A	422.041	6.23	C13H12N8O5P2	#N/A	#N/A	rp
FAUX	422.04336@1.021-rp	#N/A	422.043	1.021	C8H15ClN6O12	#N/A	#N/A	rp
FAUX	422.04619@1.122-rp	#N/A	422.046	1.122	C6H16N8O10P2	#N/A	#N/A	rp
FAUX	422.08204@1.067-rp	#N/A	422.082	1.067	C9H15N10O8P	#N/A	Metabolic pathways;Biosynthesis of secondary metabolites;Other	rp
FAUX	422.26708@10.727-rp	#N/A	422.267	10.727	C25H34N4O2	#N/A	Metabolic pathways;Biosynthesis of secondary metabolites;Other	rp
FAUX	422.26726@14.11-rp	#N/A	422.267	14.11	C18H34N10S	#N/A	Metabolic pathways;Biosynthesis of secondary metabolites;Other	rp
FAUX	422.26737@12.843-rp	#N/A	422.267	12.843	C19H35N8OP	#N/A	Metabolic pathways;Biosynthesis of secondary metabolites;Other	rp
FAUX	423.06135@0.897-rp	#N/A	423.061	0.897	C9H17N3O16	#N/A	#N/A	rp
FAUX	423.07799@1.091-rp	#N/A	423.078	1.091	C6H19N9O9P2	#N/A	#N/A	rp
FAUX	423.09489@1.442-rp	#N/A	423.095	1.442	C12H26NO11PS	#N/A	#N/A	rp
FAUX	423.09512@2.364-rp	#N/A	423.095	2.364	C16H28NO4P3S	#N/A	#N/A	rp
FAUX	423.29836@13.547-rp	#N/A	423.298	13.547	C25H37N5O	#N/A	#N/A	rp
FAUX	CarnitineC18:2@16.898-rp	CarnitineC18:2	423.335	16.898	C25H45NO4	#N/A	#N/A	rp
FAUX	424.06291@0.893-rp	#N/A	424.063	0.893	C7H18ClN8O9P	#N/A	#N/A	rp
FAUX	424.19517@7.537-rp	#N/A	424.195	7.537	C18H32O11	#N/A	#N/A	rp
FAUX	424.24724@9.326-rp	#N/A	424.247	9.326	C23H36O7	#N/A	Bile secretion	rp
FAUX	3a,7a,12a,23-tetrahydroxycholanicacid@11.322-rp	3a,7a,12a,23-tetrahydroxycholanicacid	424.283	11.322	C24H40O6	#N/A	Other	rp
FAUX	3a,7a,12a,23-tetrahydroxycholanicacid@12.446-rp	3a,7a,12a,23-tetrahydroxycholanicacid	424.283	12.446	C24H40O6	#N/A	Other	rp
FAUX	424.28304@11.602-rp	#N/A	424.283	11.602	C25H36N4O2	#N/A	Other	rp
FAUX	424.28304@11.992-rp	#N/A	424.283	11.992	C25H36N4O2	#N/A	Other	rp
FAUX	3a,7a,12a,23-tetrahydroxycholanicacid@12.889-rp	3a,7a,12a,23-tetrahydroxycholanicacid	424.283	12.889	C24H40O6	#N/A	Other	rp
FAUX	3a,7a,12a,23-tetrahydroxycholanicacid@13.832-rp	3a,7a,12a,23-tetrahydroxycholanicacid	424.283	13.832	C24H40O6	#N/A	Other	rp
FAUX	425.09244@3.767-rp	#N/A	425.092	3.767	C14H25N3O6P2S	#N/A	#N/A	rp
FAUX	425.16283@11.335-rp	#N/A	425.163	11.335	C21H34NP3S	#N/A	#N/A	rp
FAUX	425.28624@12.443-rp	#N/A	425.286	12.443	C16H40N7O4P	#N/A	#N/A	rp
FAUX	425.28635@11.995-rp	#N/A	425.286	11.995	C16H40N7O4P	#N/A	#N/A	rp
FAUX	425.28653@11.317-rp	#N/A	425.287	11.317	C19H46N3OP3	#N/A	#N/A	rp
FAUX	425.31394@14.312-rp	#N/A	425.314	14.312	C24H43NO5	#N/A	#N/A	rp
FAUX	425.31403@13.323-rp	#N/A	425.314	13.323	C24H43NO5	#N/A	#N/A	rp
FAUX	425.3141@13.861-rp	#N/A	425.314	13.861	C24H43NO5	#N/A	#N/A	rp
FAUX	CarnitineC18:1@17.905-rp	CarnitineC18:1	425.35	17.905	C25H47NO4	#N/A	#N/A	rp
FAUX	425.97721@0.891-rp	#N/A	425.977	0.891	C7H10N10O4S4	#N/A	#N/A	rp
FAUX	426.04786@0.819-rp	#N/A	426.048	0.819	C26H15ClO2S	#N/A	#N/A	rp
FAUX	426.08795@1.046-rp	#N/A	426.088	1.046	C12H26O12S2	#N/A	Metabolic pathways;Other	rp
FAUX	426.13237@7.034-rp	#N/A	426.132	7.034	C18H29N4P3S	#N/A	#N/A	rp
FAUX	426.15081@9.149-rp	#N/A	426.151	9.149	C15H23N8O5P	#N/A	#N/A	rp
FAUX	426.15083@8.072-rp	#N/A	426.151	8.072	C17H33O6P3	#N/A	#N/A	rp
FAUX	427.02907@1.813-rp	#N/A	427.029	1.813	C8H20N3O11P3	#N/A	Metabolic pathways;Biosynthesis of secondary metabolites;Purine metabolism;Other	rp
FAUX	427.02976@1.419-rp	#N/A	427.03	1.419	C11H11N9O6P2	#N/A	Metabolic pathways;Biosynthesis of secondary metabolites;Purine metabolism;Other	rp
FAUX	CarnitineC18:0@19.246-rp	CarnitineC18:0	427.366	19.246	C25H49NO4	#N/A	#N/A	rp
FAUX	428.0337@1.506-rp	#N/A	428.034	1.506	C21H4N10S	#N/A	#N/A	rp
FAUX	428.18746@12.245-rp	#N/A	428.187	12.245	C25H34P2S	#N/A	#N/A	rp
FAUX	428.233@0.938-rp	#N/A	428.233	0.938	C16H38N4O5P2	#N/A	#N/A	rp
FAUX	428.25316@13.551-rp	#N/A	428.253	13.551	C21H36N2O7	#N/A	#N/A	rp
FAUX	428.29261@14.041-rp	#N/A	428.293	14.041	C27H40O4	#N/A	#N/A	rp
FAUX	429.06642@1.64-rp	#N/A	429.066	1.64	C7H21N5O12P2	#N/A	#N/A	rp
FAUX	429.11674@1.025-rp	#N/A	429.117	1.025	#N/A	#N/A	#N/A	rp
FAUX	429.14947@5.37-rp	#N/A	429.149	5.37	C10H24N9O8P	#N/A	#N/A	rp
FAUX	429.28762@13.052-rp	#N/A	429.288	13.052	C27H35N5	#N/A	#N/A	rp
FAUX	429.28786@12.434-rp	#N/A	429.288	12.434	C26H39NO4	#N/A	#N/A	rp
FAUX	429.36056@11.85-rp	#N/A	429.361	11.85	C28H47NO2	#N/A	#N/A	rp
FAUX	429.86372@0.927-rp	#N/A	429.864	0.927	C9HCl2N2O12P	#N/A	#N/A	rp
FAUX	430.02799@1.086-rp	#N/A	430.028	1.086	#N/A	#N/A	#N/A	rp
FAUX	430.09039@8.409-rp	#N/A	430.09	8.409	C22H14N4O6	#N/A	#N/A	rp
FAUX	430.0906@8.984-rp	#N/A	430.091	8.984	C24H19N2O2PS	#N/A	#N/A	rp
FAUX	430.13363@2.495-rp	#N/A	430.134	2.495	C16H22N4O10	#N/A	#N/A	rp
FAUX	430.13379@2.962-rp	#N/A	430.134	2.962	C16H22N4O10	#N/A	#N/A	rp
FAUX	430.16197@3.077-rp	#N/A	430.162	3.077	C21H29N4P3	#N/A	#N/A	rp
FAUX	430.18662@19.841-rp	#N/A	430.187	19.841	C21H35ClN2OS2	#N/A	#N/A	rp
FAUX	430.20364@11.834-rp	#N/A	430.204	11.834	C22H30N4O3S	#N/A	#N/A	rp
FAUX	430.25719@16.836-rp	#N/A	430.257	16.836	C23H34N4O4	#N/A	#N/A	rp
FAUX	430.26893@14.306-rp	#N/A	430.269	14.306	C30H38S	#N/A	#N/A	rp
FAUX	430.26918@13.331-rp	#N/A	430.269	13.331	C30H38S	#N/A	#N/A	rp
FAUX	430.26949@13.869-rp	#N/A	430.269	13.869	C23H45OP3	#N/A	#N/A	rp
FAUX	430.30788@12.535-rp	#N/A	430.308	12.535	C21H43N4O3P	#N/A	Biosynthesis of plant secondary metabolites;Other	rp
FAUX	430.30791@13.53-rp	#N/A	430.308	13.53	C21H43N4O3P	#N/A	Biosynthesis of plant secondary metabolites;Other	rp
FAUX	7a-hydroxy-3-oxo-4-cholestenoicacid@17.841-rp	7a-hydroxy-3-oxo-4-cholestenoicacid	430.308	17.841	C27H42O4	#N/A	Biosynthesis of plant secondary metabolites;Other	rp
FAUX	431.16324@1.022-rp	#N/A	431.163	1.022	C10H26N9O8P	#N/A	#N/A	rp
FAUX	431.99704@0.91-rp	#N/A	431.997	0.91	C11H10N6O9P2	#N/A	#N/A	rp
FAUX	432.0436@1.083-rp	#N/A	432.044	1.083	C10H18N4O11P2	#N/A	#N/A	rp
FAUX	432.09863@1.237-rp	#N/A	432.099	1.237	C12H24N4O9S2	#N/A	#N/A	rp
FAUX	432.24074@6.907-rp	#N/A	432.241	6.907	C15H34N10OP2	#N/A	#N/A	rp
FAUX	432.2728@17.782-rp	#N/A	432.273	17.782	C23H36N4O4	#N/A	#N/A	rp
FAUX	433.09546@1.013-rp	#N/A	433.095	1.013	C10H24N7O6PS2	#N/A	#N/A	rp
FAUX	433.13334@1.697-rp	#N/A	433.133	1.697	C14H28NO12P	#N/A	Metabolic pathways;Other	rp
FAUX	433.18875@9.168-rp	#N/A	433.189	9.168	C19H27N7O3S	#N/A	#N/A	rp
FAUX	434.08@1.745-rp	#N/A	434.08	1.745	C8H18N8O11S	#N/A	#N/A	rp
FAUX	Naringenin-7-O-glucoside@10.404-rp	Naringenin-7-O-glucoside	434.122	10.404	C21H22O10	#N/A	Other	rp
FAUX	434.16167@11.285-rp	#N/A	434.162	11.285	C18H31N2O6PS	#N/A	#N/A	rp
FAUX	435.153@9.84-rp	#N/A	435.153	9.84	C25H27NO2P2	#N/A	#N/A	rp
FAUX	435.16789@8.325-rp	#N/A	435.168	8.325	C19H36NO2P3S	#N/A	#N/A	rp
FAUX	435.95558@0.907-rp	#N/A	435.956	0.907	C10H6ClN6O10P	#N/A	#N/A	rp
FAUX	436.09318@1.064-rp	#N/A	436.093	1.064	#N/A	#N/A	#N/A	rp
FAUX	436.09714@1.072-rp	#N/A	436.097	1.072	#N/A	#N/A	#N/A	rp
FAUX	436.12682@1.483-rp	#N/A	436.127	1.483	C13H29N2O10PS	#N/A	#N/A	rp
FAUX	436.14888@7.997-rp	#N/A	436.149	7.997	C17H26N8P2S	#N/A	#N/A	rp
FAUX	436.25368@6.432-rp	#N/A	436.254	6.432	C18H36N4O8	#N/A	#N/A	rp
FAUX	437.14701@5.454-rp	#N/A	437.147	5.454	C18H34NO3P3S	#N/A	#N/A	rp
FAUX	437.14724@5.279-rp	#N/A	437.147	5.279	C14H32NO10PS	#N/A	#N/A	rp
FAUX	437.18042@8.179-rp	#N/A	437.18	8.179	C18H32NO9P	#N/A	#N/A	rp
FAUX	437.29076@16.749-rp	#N/A	437.291	16.749	C21H44NO6P	#N/A	Biosynthesis of secondary metabolites;Other	rp
FAUX	437.95292@0.906-rp	#N/A	437.953	0.906	C10H7N4O12PS	#N/A	#N/A	rp
FAUX	438.09398@7.471-rp	#N/A	438.094	7.471	C17H19N4O8P	#N/A	#N/A	rp
FAUX	438.31328@15.192-rp	#N/A	438.313	15.192	C29H42O3	#N/A	#N/A	rp
FAUX	438.33408@18.287-rp	#N/A	438.334	18.287	C26H46O5	#N/A	#N/A	rp
FAUX	439.03499@0.892-rp	#N/A	439.035	0.892	C11H20N7O2P3S2	#N/A	#N/A	rp
FAUX	439.32958@15.063-rp	#N/A	439.33	15.063	C29H45NS	#N/A	#N/A	rp
FAUX	440.05087@4.297-rp	#N/A	440.051	4.297	C15H9N10O5P	#N/A	#N/A	rp
FAUX	440.08345@8.56-rp	#N/A	440.083	8.56	C15H25N2O7PS2	#N/A	#N/A	rp
FAUX	440.09334@1.064-rp	#N/A	440.093	1.064	C12H25O15P	#N/A	#N/A	rp
FAUX	440.14745@2.517-rp	#N/A	440.147	2.517	C12H28N2O15	#N/A	#N/A	rp
FAUX	440.16887@9.977-rp	#N/A	440.169	9.977	C16H35N4O2P3S	#N/A	#N/A	rp
FAUX	440.27814@10.73-rp	#N/A	440.278	10.73	C24H40O7	#N/A	#N/A	rp
FAUX	440.27817@11.2-rp	#N/A	440.278	11.2	C24H40O7	#N/A	#N/A	rp
FAUX	441.03465@2.473-rp	#N/A	441.035	2.473	C20H11NO11	#N/A	#N/A	rp
FAUX	441.12061@6.134-rp	#N/A	441.121	6.134	C20H30NO2P3S	#N/A	#N/A	rp
FAUX	441.34533@15.877-rp	#N/A	441.345	15.877	C26H43N5O	#N/A	#N/A	rp
[truncated: 1,494 more rows]

## Sheet: Area
	liver-690-ATB_55	liver-692-ATB_57	liver-686-ATB_51	liver-688-ATB_53	liver-691-ATB_56	liver-694-ATB_59	liver-666-FMT_31	liver-670-FMT_35	liver-683-FMT_48	liver-682-FMT_47	liver-678-FMT_43	liver-669-FMT_34	liver-668-FMT-AKK_33	liver-675-FMT-AKK_40	liver-680-FMT-AKK_45	liver-679-FMT-AKK_44	liver-672-FMT-AKK_37	liver-674-FMT-AKK_39	liver-667-FMT-AKK-Pas_32	liver-681-FMT-AKK-Pas_46	liver-676-FMT-AKK-Pas_41	liver-673-FMT-AKK-Pas_38	liver-677-FMT-AKK-Pas_42	liver-671-FMT-AKK-Pas_36	Bl_matrice-liver_5a	QC_liver_6a	QC_liver_6b	QC_liver_6c	QC_liver_6d	QC_liver_6e	QC_batch_6f	Bl_matrice_5b	liver-684-SPF_49	liver-685-SPF_50	liver-689-SPF_54	liver-687-SPF_52	liver-693-SPF_58	liver-695-SPF_60
delta-Valerolactone@1.06-rp	591933	363998	600444	676884	595423	648036	540040	526431	454147	431785	1.24357e+06	662896	796111	769350	440671	621961	591343	486184	2.03847e+06	2.11783e+06	1.93665e+06	726237	1.42458e+06	1.47759e+06	32271.4	900987	1.08601e+06	603995	681657	757509	1.17984e+06	544206	549846	555771	447339	611540	800308	517406
445.08937@1.425-rp	185356	225022	611780	662668	179441	176937	284489	881958	448528	477254	274640	530741	267551	345759	385323	423301	595557	698190	928895	1.50608e+06	1.27818e+06	913431	643891	1.28782e+06	16395.5	625554	418122	649953	524097	458215	366265	15411.2	206343	257716	202582	225611	252938	221963
640.19457@9.088-rp	20069	21427.2	21255.8	22793.5	22539.9	22283	22147.4	37447.8	21802	22796.6	22137.4	21454.9	21614.5	22006.3	22813	21833.9	22892.1	21865.1	985918	810271	385285	22676.7	927215	759938	20761.4	108764	84692.4	105366	85534.8	93355.5	107279	20921.9	21361.6	22486.3	21443.7	22192.4	21260.6	21445.3
100.00102@0.834-rp	147318448	1.21475e+08	1.75947e+08	1.45233e+08	1.91934e+08	1.33482e+08	1.80976e+08	1.32319e+08	1.24756e+08	1.56085e+08	1.76335e+08	173541540	1.43228e+08	1.82797e+08	1.10434e+08	125896737	1.63688e+08	1.50512e+08	1.80513e+08	1.69093e+08	1.57153e+08	2.27479e+08	1.38596e+08	1.48931e+08	8.52359e+06	1.41525e+08	1.81136e+08	1.65945e+08	1.45116e+08	1.68407e+08	1.53378e+08	7.99351e+06	1.35783e+08	1.72852e+08	4.21486e+07	1.50738e+08	1.8953e+08	164139519
100.01591@1.553-rp	4.66e+06	1.2866e+07	8.03818e+06	5.96189e+06	9.27623e+06	7.94753e+06	1.62769e+07	6.84723e+06	2.09086e+06	7.57213e+06	7.97716e+06	4.94598e+06	3.64431e+06	1.3022e+07	4.06533e+06	1.23693e+07	5.06851e+06	9.17355e+06	8.47286e+06	5.91958e+06	6.11035e+06	8.6812e+06	8.15826e+06	8.45684e+06	417760	9.3431e+06	8.10884e+06	7.68176e+06	8.43418e+06	9.08123e+06	8.26692e+06	333991	9.26518e+06	7.45004e+06	4.41336e+06	6.22529e+06	1.00729e+07	1.53176e+07
100.01604@5.677-rp	49270.9	87193	76694.1	544834	154145	95638.2	98818.6	422016	702616	439739	60838.8	59089.5	96081.3	705440	2.22446e+06	88413.4	72948.2	92327.2	263908	88365.4	304241	245811	69925.8	255048	39476.6	285104	347547	243459	242062	213149	299880	42383	272508	460333	35607.4	124699	126421	62527.6
100.05139@1.071-rp	888516	1.58098e+06	1.15384e+06	3.03867e+06	2.3447e+06	1.41391e+06	2.95187e+06	1.9026e+06	1.61884e+06	2.67675e+06	2.28767e+06	2.27996e+06	1.46717e+06	2.98266e+06	1.88605e+06	2.24001e+06	2.7407e+06	3.62996e+06	4.32851e+06	2.92008e+06	2.7537e+06	3.26199e+06	1.04423e+06	3.77867e+06	15676.9	2.54201e+06	2.35219e+06	2.69818e+06	2.46881e+06	2.42815e+06	2.15064e+06	15164.2	2.80061e+06	3.26363e+06	1.78023e+06	2.67972e+06	1.95882e+06	1.85242e+06
101.00169@0.824-rp	1.55996e+07	1.43851e+07	1.68028e+07	1.43582e+07	1.85189e+07	1.42385e+07	1.85769e+07	1.61226e+07	1.22206e+07	1.58823e+07	1.66113e+07	1.69738e+07	1.36645e+07	1.86213e+07	1.05668e+07	1.34716e+07	1.80006e+07	1.61809e+07	2.13912e+07	1.65594e+07	1.51844e+07	2.22655e+07	1.56112e+07	1.62855e+07	1.0188e+06	1.74119e+07	1.73518e+07	1.59112e+07	1.77451e+07	1.66888e+07	1.70243e+07	1.0372e+06	1.28636e+07	1.67718e+07	4.229e+06	1.48519e+07	1.83309e+07	1.79702e+07
Carboxycyclopropylamine@1.011-rp	6.77766e+06	1.04501e+07	8.2485e+06	1.50041e+07	1.54584e+07	8.69693e+06	1.31114e+07	1.23061e+07	1.11594e+07	1.40868e+07	1.15103e+07	1.75378e+07	1.11603e+07	1.6039e+07	1.30991e+07	1.43508e+07	1.46469e+07	1.45585e+07	2.01741e+07	1.59259e+07	1.51374e+07	1.80372e+07	8.64437e+06	1.67752e+07	633459	1.42855e+07	1.36986e+07	1.2861e+07	1.35127e+07	1.36525e+07	1.36421e+07	720536	1.74297e+07	1.90779e+07	1.21015e+07	2.24605e+07	1.26602e+07	1.21018e+07
101.9985@0.831-rp	1.79129e+07	1.78464e+07	2.13162e+07	1.7431e+07	2.29263e+07	1.87181e+07	2.31059e+07	2.0877e+07	1.47809e+07	1.94267e+07	2.1584e+07	2.16699e+07	1.73429e+07	2.30228e+07	1.31094e+07	1.72538e+07	2.25373e+07	2.15784e+07	2.55127e+07	2.05957e+07	1.97692e+07	2.76312e+07	1.90532e+07	2.00209e+07	1.09585e+06	2.11814e+07	2.17368e+07	1.96761e+07	2.17983e+07	2.01589e+07	2.12308e+07	1.1149e+06	1.58823e+07	2.13548e+07	4.48281e+06	1.83211e+07	2.29326e+07	2.18673e+07
2-methyl-3-oxopropanoicacid@1.053-rp	2.84439e+07	3.82988e+07	2.84542e+07	6.18608e+07	6.01314e+07	4.23922e+07	4.32998e+07	3.27736e+07	4.57714e+07	4.3414e+07	3.74825e+07	4.46026e+07	3.2042e+07	4.3095e+07	4.7019e+07	4.24642e+07	5.19771e+07	4.18119e+07	5.79191e+07	5.26854e+07	4.54696e+07	5.36274e+07	3.14574e+07	6.12518e+07	652058	4.23303e+07	4.74555e+07	4.15268e+07	4.56145e+07	4.29523e+07	4.30414e+07	1.70146e+06	6.01738e+07	5.33809e+07	4.63954e+07	4.7195e+07	3.86795e+07	3.61537e+07
2-methyl-3-oxopropanoicacid@1.428-rp	21198619	2.31774e+07	1.93277e+07	2.70947e+07	2.40466e+07	2.80212e+07	3.66552e+07	4.1272e+07	3.29369e+07	2.80471e+07	3.12171e+07	2.73562e+07	2.96883e+07	3.80508e+07	4.0245e+07	3.7991e+07	2.86704e+07	3.02844e+07	4.70634e+07	4.8799e+07	6.4663e+07	3.78381e+07	2.43661e+07	4.21824e+07	242725	3.71022e+07	3.89179e+07	3.46745e+07	3.96002e+07	2.95591e+07	3.67894e+07	149537	3.71507e+07	2.9893e+07	1.42554e+07	2.07196e+07	1.64591e+07	2.6734e+07
102.04692@1.903-rp	1.32527e+08	1.69329e+08	1.31113e+08	2.43675e+08	2.11823e+08	1.75811e+08	2.16752e+08	2.05122e+08	1.82766e+08	1.99598e+08	2.46404e+08	1.75826e+08	2.04447e+08	2.67376e+08	2.20291e+08	2.5223e+08	202339533	2.27581e+08	3.24659e+08	2.13757e+08	2.71551e+08	2.51825e+08	1.35046e+08	2.73744e+08	340832	2.51408e+08	2.06975e+08	2.17998e+08	2.04912e+08	2.43119e+08	2.23592e+08	427981	3.06523e+08	2.63412e+08	2.44777e+08	2.72815e+08	2.02654e+08	1.74461e+08
2-aminobutyricacid@1.038-rp	1.2829e+07	2.34474e+07	1.46787e+07	2.68803e+07	2.33644e+07	1.65959e+07	2.27849e+07	1.80717e+07	1.66249e+07	1.78116e+07	1.81556e+07	2.12993e+07	1.22037e+07	1.83894e+07	1.95729e+07	1.75753e+07	2.07155e+07	2.79209e+07	3.37959e+07	2.70384e+07	2.64057e+07	3.12551e+07	1.1628e+07	2.37474e+07	467205	2.07368e+07	1.85356e+07	1.90632e+07	1.99141e+07	2.01136e+07	2.23369e+07	493872	2.22141e+07	3.06907e+07	1.06046e+07	2.35686e+07	1.17081e+07	2.32074e+07
Choline@0.998-rp	9.35168e+07	1.15707e+08	8.36736e+07	2.04365e+08	1.266e+08	1.24592e+08	8.41567e+07	1.24941e+08	1.45458e+08	1.92756e+08	1.32273e+08	1.82324e+08	1.83983e+08	1.27059e+08	1.39819e+08	1.64889e+08	1.85245e+08	1.59038e+08	1.4846e+08	1.35835e+08	1.28267e+08	1.71997e+08	9.61887e+07	1.5303e+08	225675	1.58077e+08	1.3639e+08	1.36388e+08	1.53379e+08	1.44994e+08	1.60296e+08	315548	1.71593e+08	184979885	1.84668e+08	213788841	1.53123e+08	8.73114e+07
103.98496@0.921-rp	1.04758e+08	8.73931e+07	6.74851e+07	3.13201e+07	1.93408e+07	8.61539e+07	2.74899e+07	7.32506e+07	2.67043e+07	3.70106e+07	5.74267e+07	2.70922e+07	5.50427e+07	4.30048e+07	2.36167e+07	3.43298e+07	3.65085e+07	5.04291e+07	1.95351e+07	2.30632e+07	2.78727e+07	2.215e+07	9.66313e+07	2.534e+07	4.96015e+06	4.30361e+07	3.22574e+07	3.85813e+07	4.02058e+07	4.19007e+07	4.39382e+07	5.25667e+06	1.56513e+07	2.79622e+07	2.73575e+07	2.56201e+07	5.73969e+07	4.31473e+07
2-hydroxy-3-oxopropanoicacid@1.059-rp	7.77252e+06	1.46861e+07	1.78832e+07	2.34255e+07	2.42239e+07	1.7627e+07	1.82369e+07	1.78967e+07	2.59492e+07	2.38505e+07	2.29604e+07	2.7829e+07	2.45379e+07	15255891	2.77554e+07	2.43693e+07	2.85483e+07	2.06334e+07	2.67808e+07	1.81915e+07	1.67714e+07	2.15131e+07	18991258	2.15892e+07	133032	2.07665e+07	2.10445e+07	1.61529e+07	2.41072e+07	2.451e+07	2.67456e+07	129705	2.42879e+07	2.62048e+07	1.59858e+07	2.17425e+07	3.09447e+07	2.29045e+07
104.0262@5.966-rp	214828	198957	94697.3	285982	140025	197011	123369	265131	135369	474821	302960	239623	174439	82390	345797	116340	239843	406840	580748	195572	306443	393856	239557	356214	100306	430857	379700	448149	440929	434696	384193	81147.7	1.59996e+06	1.32778e+06	1.11633e+06	719319	1.15903e+06	930134
105.02138@2.397-rp	3064859833	3382199660	2818887996	5583323477	4954175839	3458869164	4016691018	4722241593	3002164175	4420003143	4521559364	4300891131	3829827545	4519584290	4044220998	3777006233	4019761969	4786773754	5071728852	4538035063	4922081651	4582549721	2729050369	5734954708	209890	4795431315	4409995537	4288706951	4210342320	4380498078	4507362151	1.6403e+06	4613093882	4839429123	4309994750	5141009938	4801393431	3114864933
Serine@1.008-rp	622451227	5.8059e+08	6.98525e+08	1052735064	1027115926	6.03956e+08	7.91877e+08	7.68267e+08	7.995e+08	8.73653e+08	663105713	1045580606	8.73345e+08	1335548245	9.00418e+08	1027532505	1192717781	1017398986	9.9182e+08	8.5876e+08	7.82845e+08	1331382369	5.87525e+08	1014367267	2.25382e+06	9.85419e+08	8.54691e+08	8.20098e+08	9.61259e+08	8.5828e+08	8.90945e+08	4.3031e+06	834184990	9.95219e+08	7.03051e+08	1131957446	1000402365	5.27188e+08
108.02102@1.061-rp	7.5045e+06	7.17045e+06	5.8333e+06	9.69411e+06	1.10325e+07	1.27225e+07	7.27784e+06	6.56557e+06	9.05174e+06	1.02919e+07	9.09017e+06	8.55724e+06	8.05718e+06	8.14924e+06	8.3188e+06	9.46777e+06	1.13476e+07	7.78747e+06	8.14221e+06	9.03563e+06	6.88707e+06	9.93888e+06	9.23829e+06	1.13565e+07	69882.1	8.54259e+06	8.16757e+06	8.03596e+06	9.04848e+06	8.11045e+06	8.93811e+06	195819	8.48327e+06	7.25404e+06	6.84592e+06	7.03884e+06	9.99536e+06	6.60428e+06
Hypotaurine@1.009-rp	5.93657e+06	1.51718e+07	7.54078e+06	1.35062e+07	1.35713e+07	8.21642e+06	6.5003e+06	9.52596e+06	5.64204e+06	8.31764e+06	1.17131e+07	8.9736e+06	4.98635e+06	5.86303e+06	6.23273e+06	6.20557e+06	8.68478e+06	9.95579e+06	1.3034e+07	1.57312e+07	1.09284e+07	1.02112e+07	5.32858e+06	6.12972e+06	259460	1.03041e+07	8.08067e+06	7.69898e+06	9.12125e+06	8.29645e+06	1.02486e+07	97822.4	9.6198e+06	1.40972e+07	3.49031e+06	8.75607e+06	5.8609e+06	1.25715e+07
109.06391@0.986-rp	4.42988e+06	4.48146e+06	5.47919e+06	9.18406e+06	7.33983e+06	4.16664e+06	8.52834e+06	8.00714e+06	8.83329e+06	7.02771e+06	8.27101e+06	1.00264e+07	6.66682e+06	1.00615e+07	8.77757e+06	8.23033e+06	1.0363e+07	1.04251e+07	1.04793e+07	1.07142e+07	8.08224e+06	9.54894e+06	6.43915e+06	8.15567e+06	16416	7.99802e+06	7.36459e+06	6.69948e+06	7.43527e+06	9.34162e+06	8.84763e+06	17639.5	8.07721e+06	9.79355e+06	7.25355e+06	1.12789e+07	7.69754e+06	7.47481e+06
109.06392@0.895-rp	4.12441e+06	3.47803e+06	4.09333e+06	4.93185e+06	6.33716e+06	2.03254e+06	5.79368e+06	5.22931e+06	4.3202e+06	4.01158e+06	5.68667e+06	6.1113e+06	4.05621e+06	6.89065e+06	5.4362e+06	4.97094e+06	4.83281e+06	4.52077e+06	5.42108e+06	4.84301e+06	6.35868e+06	7.66196e+06	2.57688e+06	5.98491e+06	155657	4.6943e+06	5.98018e+06	5.4331e+06	5.04661e+06	4.88757e+06	4.96057e+06	168524	5.60628e+06	5.47637e+06	4.09727e+06	6.14185e+06	5.21884e+06	3.64944e+06
2,5-dihydroxypyridine@1.713-rp	2.23461e+06	1.90905e+06	1.90735e+06	3.55758e+06	2.60799e+06	2.80344e+06	1.48899e+06	2.11727e+06	2.27591e+06	2.7631e+06	2.64767e+06	2.00145e+06	2.51866e+06	2.38082e+06	2.46771e+06	2.44509e+06	2.57334e+06	2.40551e+06	2.2468e+06	2.21327e+06	2.53587e+06	1.89887e+06	1.48825e+06	2.6809e+06	28262.4	2.35537e+06	2.28361e+06	2.13144e+06	1.94196e+06	2.53904e+06	2.20056e+06	42911.9	2.29862e+06	1.54979e+06	2.42883e+06	1.96196e+06	1.67517e+06	963355
111.04236@1.072-rp	888516	1.58098e+06	1.15384e+06	3.03867e+06	2.3447e+06	1.41391e+06	2.95187e+06	1.9026e+06	1.61884e+06	2.67675e+06	2.28767e+06	2.27996e+06	1.46717e+06	2.98266e+06	1.88605e+06	2.24001e+06	2.7407e+06	3.62996e+06	4.32851e+06	2.92008e+06	2.7537e+06	3.26199e+06	1.04423e+06	3.77867e+06	16472.5	2.54201e+06	2.35219e+06	2.69818e+06	2.46881e+06	2.42815e+06	2.15064e+06	15933.8	2.80061e+06	3.26363e+06	1.78023e+06	2.67972e+06	1.95882e+06	1.85242e+06
Cytosine@1.107-rp	5.3215e+06	1.66006e+06	4.4881e+06	7.65156e+06	7.07211e+06	5.49561e+06	9.38079e+06	5.33331e+06	6.26934e+06	7.76922e+06	7.034e+06	5.38601e+06	7.06268e+06	5.62886e+06	2.14734e+06	8.34799e+06	7.3627e+06	2.01978e+06	7.44104e+06	2.76245e+06	2.16616e+06	7.77766e+06	3.59515e+06	2.0478e+06	83114.7	6.65148e+06	6.53221e+06	4.65714e+06	6.56017e+06	6.59344e+06	6.66301e+06	95360.1	5.42916e+06	5.35475e+06	1.66525e+06	6.31411e+06	2.08723e+06	8.36279e+06
Hydroxymethylphosphonicacid@1.052-rp	3.54147e+08	5.63198e+08	531650831	8.84852e+08	9.69228e+08	5.19886e+08	9.8698e+08	7.99492e+08	6.42177e+08	8.78097e+08	5.21421e+08	7.3926e+08	7.09142e+08	8.69806e+08	9.3497e+08	1063221910	7.32645e+08	5.92447e+08	7.57048e+08	8.94922e+08	6.68304e+08	1014433308	5.14534e+08	6.46451e+08	209870	7.46669e+08	737171267	6.97632e+08	7.34894e+08	6.91224e+08	7.2506e+08	1.21153e+06	7.83269e+08	6.78433e+08	8.92595e+08	7.80096e+08	774940288	649828263
2-furoicacid@1.124-rp	2.99059e+07	3.83483e+07	2.94653e+07	5.0033e+07	5.09149e+07	4.64807e+07	3.37853e+07	3.39574e+07	1.05403e+07	4.57451e+07	3.68983e+07	3.54413e+07	3.448e+07	3.72182e+07	3.63708e+07	3.88126e+07	4.21098e+07	4.0024e+07	3.73501e+07	4.72968e+07	3.31177e+07	3.7311e+07	3.1994e+07	4.52279e+07	356633	3.99607e+07	3.6113e+07	3.78096e+07	4.03088e+07	3.90145e+07	4.32818e+07	394848	4.03876e+07	3.16785e+07	3.79423e+07	3.7735e+07	4.63287e+07	2.67871e+07
Uracil@1.717-rp	7.04328e+07	7.52769e+07	6.49647e+07	1.23562e+08	8.83234e+07	1.11013e+08	6.70478e+07	7.42412e+07	9.38359e+07	1.12555e+08	8.25458e+07	7.70097e+07	8.00124e+07	1.09625e+08	1.00166e+08	112187190	8.83601e+07	1.00635e+08	9.97227e+07	9.15443e+07	8.47655e+07	8.31956e+07	5.70982e+07	9.75121e+07	332401	9.23192e+07	8.97724e+07	9.27139e+07	9.62665e+07	8.7052e+07	8.05752e+07	670175	9.01057e+07	7.31554e+07	9.26197e+07	1.0413e+08	7.92494e+07	3.97498e+07
112.99585@1.14-rp	1.88579e+06	2.58375e+06	1.35341e+06	5.97666e+06	4.3891e+06	1.48551e+06	3.13967e+06	3.25621e+06	3.72207e+06	2.89973e+06	2.80516e+06	2.45729e+06	2.8841e+06	2.82571e+06	3.31908e+06	2.5458e+06	2.59521e+06	2.29961e+06	3.14364e+06	4.12845e+06	3.04971e+06	2.85416e+06	1.53254e+06	2.71594e+06	20271	3.06122e+06	3.06087e+06	3.26153e+06	2.57782e+06	2.21302e+06	2.05411e+06	20359.2	2.60239e+06	3.00466e+06	5.16143e+06	3.24793e+06	2.29183e+06	1.89765e+06
1-pyrroline-2-carboxylicacid@1.046-rp	2.04266e+06	3.37956e+06	2.37911e+06	4.51166e+06	3.64175e+06	2.5445e+06	3.94921e+06	3.3871e+06	3.02112e+06	3.51176e+06	2.95751e+06	3.80782e+06	2.95621e+06	4.33403e+06	3.92585e+06	4.01301e+06	4.36218e+06	4.43914e+06	5.02852e+06	4.20603e+06	3.72338e+06	4.77344e+06	2.28636e+06	4.9375e+06	166597	4.0894e+06	3.5999e+06	3.16637e+06	3.55452e+06	3.72174e+06	3.60769e+06	365061	4.43111e+06	4.66647e+06	2.683e+06	4.49193e+06	3.29355e+06	2.89276e+06
113.05305@0.99-rp	467356	590294	403092	590728	564302	392468	399314	556607	403390	400122	515125	385498	315965	705996	677866	619584	486772	1.77043e+06	4.33718e+06	491273	964064	762135	394069	876474	18732.4	842447	511987	733596	742184	736873	866866	18331	1.24142e+06	434411	504866	785661	545714	480264
Creatinine@1.019-rp	2.12453e+06	3.55907e+06	3.03834e+06	5.32726e+06	5.62996e+06	2.78436e+06	4.40395e+06	3.34582e+06	2.9887e+06	4.46515e+06	2.73096e+06	3.87054e+06	3.81975e+06	4.72423e+06	3.17949e+06	4.26662e+06	4.45104e+06	6.76977e+06	8.33918e+06	4.64964e+06	4.72269e+06	6.57441e+06	2.48599e+06	5.709e+06	91939.4	3.9316e+06	4.15359e+06	3.59263e+06	4.37386e+06	3.71144e+06	3.39188e+06	115791	4.3293e+06	4.34151e+06	2.77981e+06	4.18785e+06	2.56811e+06	2.57638e+06
Creatinine@1.005-rp	234107	240414	218952	321293	553166	282228	477801	284561	226594	334457	256753	553169	424434	329309	272878	295222	279436	333432	302883	266419	414122	344719	237634	405876	15318.1	529286	486665	232731	350588	488593	301229	15075.4	806966	531144	212336	627061	275852	204233
113.94021@1.233-rp	5.38036e+07	3.55092e+07	1.86e+07	5.31772e+07	4.04944e+07	4.33833e+07	6.05933e+07	6.86266e+07	2.60012e+07	1.44532e+07	2.30636e+07	4.89756e+07	2.67397e+07	6.83966e+07	1.32508e+07	7.30778e+07	3.55531e+07	6.24291e+07	3.56936e+07	5.74543e+07	1.03164e+08	7.33061e+07	3.62678e+07	6.56223e+07	6.69214e+06	4.27906e+07	4.886e+07	4.54596e+07	4.29609e+07	3.59566e+07	3.37655e+07	1.93868e+06	6.58143e+07	8.17005e+07	6.30809e+07	6.12686e+07	2.45699e+07	3.82415e+07
2-butynedioicacid@1.139-rp	1.83447e+07	1.4321e+07	1.09155e+07	2.3386e+07	2.48476e+07	1.5019e+07	2.83109e+07	2.46184e+07	1.43047e+07	1.66785e+07	2.09239e+07	2.08339e+07	1.61102e+07	2.85144e+07	1.13532e+07	1.51131e+07	1.81962e+07	2.3596e+07	2.70429e+07	2.37607e+07	1.65947e+07	2.15286e+07	1.03442e+07	2.72309e+07	38099.7	2.3949e+07	1.53934e+07	2.00967e+07	2.02792e+07	1.56125e+07	2.0161e+07	38265.6	1.47654e+07	2.23596e+07	1.38659e+07	1.31802e+07	1.42287e+07	1.69477e+07
2-hydroxy-2,4-pentadienoate@2.2-rp	441004	964088	300505	1.13722e+06	437600	483629	365007	1.15048e+06	411242	524628	485751	1.23436e+06	418184	1.44529e+06	644702	458063	1.45951e+06	1.778e+06	2.75034e+06	1.51876e+06	2.26609e+06	1.4269e+06	1.31298e+06	1.9057e+06	238878	1.32431e+06	830933	1.24173e+06	1.40136e+06	922080	993194	25845.8	1.2893e+06	1.70714e+06	299877	1.2759e+06	318753	1.66399e+06
2-hydroxy-2,4-pentadienoate@2.977-rp	1.70671e+06	3.40938e+06	1.60237e+06	7.53211e+06	1.0385e+07	4.07186e+06	1.83589e+06	3.60075e+06	2.65132e+06	3.28562e+06	4.24263e+06	3.02805e+06	7.81335e+06	2.38307e+06	5.6991e+06	8.37628e+06	2.53847e+06	3.39902e+06	3.20158e+06	6.90006e+06	2.05289e+06	3.3019e+06	694673	2.77015e+06	318257	5.21048e+06	4.22318e+06	4.71886e+06	5.1797e+06	4.51046e+06	4.55679e+06	354035	3.16856e+06	3.12328e+06	1.15181e+07	8.68038e+06	1.41693e+07	1.23718e+06
2-hydroxy-2,4-pentadienoate@1.02-rp	7.47005e+06	8.82662e+06	9.38878e+06	1.72554e+07	1.87186e+07	1.03949e+07	1.62861e+07	9.81652e+06	1.5018e+07	1.37632e+07	1.02619e+07	1.29252e+07	1.04843e+07	1.44465e+07	1.72442e+07	1.47123e+07	1.32729e+07	1.33601e+07	1.82311e+07	1.44253e+07	1.29182e+07	1.73489e+07	6.48651e+06	1.77802e+07	45919	1.31725e+07	1.30888e+07	1.36516e+07	1.30743e+07	1.35106e+07	1.34805e+07	371963	2.09001e+07	1.68162e+07	1.43198e+07	1.40771e+07	1.14395e+07	1.00172e+07
114.07924@0.877-rp	2.29499e+06	3.28005e+06	1.99066e+06	4.45457e+06	3.8737e+06	3.45029e+06	3.67093e+06	4.23188e+06	3.77671e+06	3.27331e+06	5.48392e+06	4.15215e+06	2.74177e+06	3.29244e+06	3.53661e+06	2.6838e+06	5.15836e+06	3.96845e+06	4.57563e+06	5.12282e+06	3.84944e+06	3.72447e+06	2.88876e+06	4.45616e+06	384491	3.83023e+06	4.26282e+06	3.9822e+06	3.9597e+06	4.8396e+06	3.86516e+06	391735	5.18517e+06	3.94924e+06	3.8341e+06	4.24138e+06	3.51176e+06	3.88403e+06
115.00901@1.271-rp	5.1846e+06	5.67472e+06	5.12779e+06	6.45153e+06	4.68475e+06	3.94215e+06	1.02366e+07	9.45163e+06	8.88448e+06	8.47742e+06	7.14224e+06	7.43408e+06	8.47105e+06	1.2413e+07	1.17012e+07	9.57383e+06	6.67095e+06	7.37529e+06	1.02064e+07	9.12446e+06	7.80067e+06	1.04569e+07	4.42765e+06	8.63238e+06	238413	1.01378e+07	9.34149e+06	7.30926e+06	7.3918e+06	7.54927e+06	6.7205e+06	252321	1.36043e+07	1.20188e+07	7.91203e+06	8.85978e+06	7.79529e+06	5.53908e+06
Maleamicacid@1.012-rp	1.42508e+08	2.27154e+08	2.0272e+08	392722583	3.46456e+08	1.92865e+08	2.68843e+08	2.38764e+08	2.32513e+08	2.64245e+08	1.87124e+08	3.9788e+08	2.45015e+08	3.57406e+08	2.82593e+08	3.06257e+08	3.1788e+08	2.76306e+08	3.35316e+08	2.85623e+08	2.51473e+08	4.41045e+08	1.8811e+08	3.01785e+08	1.22081e+06	3.08991e+08	2.70728e+08	2.62619e+08	2.97647e+08	2.83745e+08	2.90572e+08	2.04117e+06	3.83175e+08	4.03736e+08	290778822	6.54043e+08	2.63961e+08	2.74718e+08
115.03829@1.102-rp	2.21107e+06	3.43457e+06	2.29517e+06	3.95824e+06	3.23651e+06	2.84542e+06	3.04235e+06	2.78014e+06	3.47666e+06	3.57755e+06	3.78066e+06	3.61139e+06	3.17484e+06	3.63512e+06	3.50229e+06	2.37818e+06	3.22871e+06	3.64944e+06	3.35685e+06	3.39879e+06	3.04624e+06	3.88009e+06	2.23967e+06	3.71779e+06	44723.2	3.43639e+06	3.25175e+06	2.97057e+06	3.45308e+06	3.20131e+06	3.19331e+06	60088.8	2.84056e+06	4.59363e+06	2.5536e+06	3.76356e+06	2.21508e+06	2.04222e+06
115.03887@1.09-rp	1.08445e+06	1.30453e+06	920631	1.42141e+06	1.88322e+06	1.34014e+06	1.46153e+06	583817	1.02156e+06	1.72931e+06	1.12474e+06	1.19472e+06	961289	974298	832480	966184	1.57967e+06	1.20278e+06	1.36005e+06	1.42115e+06	1.10203e+06	1.69055e+06	1.07863e+06	1.34046e+06	134184	1.28457e+06	805489	1.01148e+06	1.46424e+06	1.175e+06	1.28405e+06	80287.9	1.0939e+06	1.18039e+06	690448	798469	908883	1.23344e+06
Proline@1.072-rp	5.78937e+07	1.17488e+08	5.80287e+07	1.42884e+08	1.04617e+08	7.82598e+07	1.21727e+08	9.81675e+07	9.44913e+07	9.95899e+07	1.21618e+08	1.08849e+08	8.12031e+07	1.12403e+08	1.0611e+08	1.06012e+08	1.30129e+08	1.17288e+08	164707572	1.0978e+08	1.36947e+08	1.37355e+08	6.87068e+07	1.27824e+08	1.97201e+06	1.1723e+08	1.10565e+08	106054284	1.08912e+08	1.10076e+08	1.10921e+08	1.96864e+06	1.51256e+08	1.44038e+08	9.14521e+07	1.10231e+08	9.83269e+07	8.93093e+07
Proline@1.672-rp	391931	580024	440745	509001	590587	454113	688203	715938	1.15223e+07	824833	5.63051e+06	1.38337e+06	2.37683e+07	3.8651e+07	1.81566e+07	3.09646e+07	2.30693e+07	2.9967e+07	6.29798e+06	6.94136e+06	1.60219e+07	2.68021e+07	2.62625e+06	1.12839e+06	214414	8.49849e+06	9.58452e+06	9.13209e+06	9.70371e+06	8.76704e+06	8.25648e+06	194590	789229	754870	570297	625151	591611	665628
Fumaricacid@1.569-rp	3.61944e+07	8.52851e+07	5.41883e+07	8.50888e+07	9.20572e+07	5.41349e+07	5.53271e+07	4.97254e+07	6.61178e+07	7.62309e+07	6.14539e+07	5.30202e+07	6.86419e+07	7.34111e+07	8.56434e+07	4.99464e+07	5.70487e+07	7.2124e+07	7.92439e+07	7.78256e+07	6.27582e+07	9.28889e+07	2.92667e+07	7.82784e+07	160723	7.19958e+07	7.10137e+07	6.94628e+07	7.1653e+07	6.32001e+07	6.45782e+07	153565	7.3667e+07	1.14372e+08	4.94087e+07	1.22864e+08	7.50175e+07	4.76178e+07
Phenylacetonitrile@3.078-rp	9.17592e+06	1.29916e+07	9.27609e+06	1.58664e+07	1.44732e+07	1.02354e+07	1.4026e+07	1.21713e+07	1.13052e+07	1.29547e+07	1.61387e+07	1.14439e+07	1.27333e+07	1.61067e+07	1.43123e+07	1.54828e+07	1.29614e+07	1.45373e+07	1.87521e+07	1.3665e+07	1.77819e+07	1.7391e+07	9.74403e+06	1.66332e+07	104519	1.57611e+07	1.44146e+07	1.34882e+07	1.47962e+07	1.3654e+07	1.44996e+07	111504	1.82721e+07	1.90175e+07	1.3894e+07	1.77282e+07	1.37863e+07	1.23809e+07
Phenylacetonitrile@1.902-rp	1.24826e+06	1.73228e+06	1.09831e+06	2.65347e+06	2.11909e+06	1.56847e+06	1.92623e+06	2.10186e+06	1.81916e+06	2.06663e+06	2.19056e+06	1.82077e+06	1.57421e+06	2.60255e+06	1.90778e+06	2.44633e+06	1.93235e+06	1.96583e+06	2.74738e+06	1.92886e+06	2.70978e+06	2.54688e+06	1.15968e+06	2.41522e+06	56899.3	2.01768e+06	2.00465e+06	1.70366e+06	1.70711e+06	2.42997e+06	2.09274e+06	41269.6	3.05422e+06	2.36554e+06	1.99027e+06	2.23866e+06	2.16179e+06	1.76379e+06
4-methylaminobutyricacid@1.093-rp	9.00179e+08	1617837495	9.80868e+08	1898927697	1382105987	9.87132e+08	2185486113	1936430953	1475008758	1637022686	2412291892	1805403353	1249220699	1150624200	1099200045	1115978607	1193363017	1521332351	2160173696	1943384169	1541230018	2151976986	8.48451e+08	1362090207	1.95744e+06	1606374543	1444826640	1410007034	1584165886	1470528143	1469428178	3.02495e+06	1207717330	1477643910	1110877231	1699275757	1466604425	1388369464
117.9799@0.954-rp	4.23519e+07	6.34159e+07	2.40195e+07	1.73469e+07	1.03936e+07	3.96395e+07	1.97697e+07	3.57147e+07	1.13127e+07	2.1451e+07	3.37987e+07	1.01237e+07	2.53111e+07	2.04496e+07	8.45476e+06	1.08374e+07	9.35984e+06	2.18017e+07	9.52323e+06	8.11491e+06	1.17323e+07	8.96807e+06	2.74016e+07	1.27766e+07	137529	1.8154e+07	2.05306e+07	1.98746e+07	2.14473e+07	21517355	1.8861e+07	879043	7.50413e+06	1.85533e+07	1.64752e+07	1.23134e+07	2.45175e+07	1.89702e+07
118.01157@0.833-rp	3.97763e+07	3.62732e+07	4.32992e+07	3.60245e+07	4.56537e+07	3.67351e+07	4.54022e+07	4.13458e+07	3.08903e+07	3.3886e+07	4.15392e+07	3.83793e+07	3.3053e+07	4.48661e+07	2.95763e+07	3.33992e+07	4.49238e+07	4.12069e+07	5.27828e+07	4.01485e+07	3.87253e+07	5.44552e+07	3.89331e+07	4.22607e+07	2.87874e+06	4.31958e+07	4.24569e+07	3.86158e+07	4.24577e+07	4.40805e+07	4.09859e+07	2.24766e+06	3.2912e+07	4.2175e+07	1.17994e+07	3.68981e+07	4.58477e+07	4.02667e+07
2-ethoxy-2-oxoaceticacid@1.553-rp	1.67976e+08	388971357	2.66896e+08	1.98958e+08	2.702e+08	2.38715e+08	4.44813e+08	2.21193e+08	7.10819e+07	2.59581e+08	2.12064e+08	1.49721e+08	1.17044e+08	4.19732e+08	1.17211e+08	419918001	1.51299e+08	2.71314e+08	2.58825e+08	2.14272e+08	1.94478e+08	2.58412e+08	2.3974e+08	2.70241e+08	7.13909e+06	277020431	2.46805e+08	2.47822e+08	2.80188e+08	2.39225e+08	2.28271e+08	1.15337e+07	2.93779e+08	245340582	1.8371e+08	1.93999e+08	3.5724e+08	437326122
118.02793@4.297-rp	4.50675e+07	8.44136e+07	6.28062e+07	1.45229e+08	1.13578e+08	60198983	5.46072e+07	1.10055e+08	9.06159e+07	1.26244e+08	9.90056e+07	9.05625e+07	1.35016e+08	6.56479e+07	1.04703e+08	6.84645e+07	6.61898e+07	6.22374e+07	6.02839e+07	1.08288e+08	8.15384e+07	5.73393e+07	5.57562e+07	1.07303e+08	164489	8.42487e+07	7.91277e+07	8.21868e+07	8.8345e+07	8.2364e+07	8.26935e+07	104782	6.54469e+07	1.09086e+08	1.2624e+08	1.05793e+08	7.38425e+07	7.03233e+07
118.02794@1.58-rp	6.65791e+07	6.4781e+07	7.74152e+07	8.53598e+07	8.32453e+07	4.52147e+07	1.06575e+08	1.009e+08	6.22678e+07	6.72528e+07	7.48903e+07	1.01854e+08	6.52025e+07	9.28321e+07	7.43881e+07	9.61722e+07	8.30753e+07	8.00583e+07	8.29449e+07	7.40036e+07	9.45953e+07	8.67889e+07	6.81659e+07	9.02772e+07	115455	7.82062e+07	7.66076e+07	8.11647e+07	9.31467e+07	8.57155e+07	8.83953e+07	1.31698e+06	6.75791e+07	9.1358e+07	6.48797e+07	8.34754e+07	8.17491e+07	9.61506e+07
118.02794@3.383-rp	8.51654e+07	1.34841e+08	8.84162e+07	1.58859e+08	137857464	1.12084e+08	8.47608e+07	1.38288e+08	1.00559e+08	1.01024e+08	107175335	1.5965e+08	7.89243e+07	175755496	1.28414e+08	1.55379e+08	1.64206e+08	1.72256e+08	1.82854e+08	1.62673e+08	1.75867e+08	1.55354e+08	8.84494e+07	1.70584e+08	91543.4	137460822	1.35293e+08	1.20767e+08	1.39602e+08	1.38656e+08	1.3429e+08	1.32462e+06	1.54262e+08	2.23648e+08	7.90328e+07	1.76033e+08	9.564e+07	1.25271e+08
118.02796@2.407-rp	1.46292e+07	1.35348e+07	9.98561e+06	2.65458e+07	2.33629e+07	2.20463e+07	1.01868e+07	1.66421e+07	1.60108e+07	2.29104e+07	2.25331e+07	1.67614e+07	1.8864e+07	2.17938e+07	1.88712e+07	1.63868e+07	2.03247e+07	2.25238e+07	2.14133e+07	2.62145e+07	1.96636e+07	1.74975e+07	1.39545e+07	2.7348e+07	45029.2	2.32e+07	1.83781e+07	1.82044e+07	1.9489e+07	2.01666e+07	2.08464e+07	54747.3	3.30861e+07	2.01686e+07	2.44075e+07	6.97082e+06	1.99534e+07	7.42087e+06
2-hydroxy-2-methylbutyricacid@2.523-rp	771228	917155	1.06425e+06	1.06437e+06	1.45005e+06	902033	3.23619e+06	2.23546e+06	1.96721e+06	2.84367e+06	2.63036e+06	2.5541e+06	1.29014e+06	2.59813e+06	1.30542e+06	1.85897e+06	1.52219e+06	2.77842e+06	2.74279e+06	2.77448e+06	3.42416e+06	3.39316e+06	1.61592e+06	3.18585e+06	115995	1.96131e+06	2.27116e+06	2.04485e+06	2.27141e+06	2.15452e+06	2.04461e+06	223395	1.81585e+06	2.42095e+06	1.28289e+06	2.05702e+06	1.19144e+06	2.31228e+06
119.01238@0.834-rp	3.32374e+06	3.29086e+06	3.8557e+06	3.56363e+06	4.4273e+06	3.25649e+06	4.34958e+06	3.92663e+06	2.81933e+06	3.50571e+06	3.8596e+06	3.61857e+06	2.8172e+06	4.25388e+06	2.48227e+06	3.21486e+06	4.22232e+06	3.60454e+06	5.11176e+06	3.55713e+06	3.66927e+06	5.06652e+06	3.85869e+06	3.91518e+06	400626	4.0403e+06	4.00483e+06	3.74873e+06	4.41668e+06	3.90881e+06	3.7894e+06	438613	2.89046e+06	3.77993e+06	787865	3.494e+06	4.42108e+06	4.28866e+06
119.03711@4.41-rp	2.75093e+06	1.83012e+06	1.46111e+06	4.21624e+06	3.10677e+06	2.95525e+06	1.64778e+06	3.4514e+06	2.35506e+06	3.81092e+06	2.80759e+06	2.88531e+06	2.07284e+06	3.11525e+06	3.87746e+06	2.96192e+06	3.30947e+06	4.10386e+06	4.11241e+06	2.74838e+06	3.89058e+06	2.15735e+06	2.49312e+06	5.35149e+06	43954.3	3.38902e+06	3.35192e+06	3.28179e+06	3.27111e+06	3.03279e+06	3.408e+06	53925.6	5.74334e+06	3.51946e+06	3.14115e+06	4.17566e+06	2.86355e+06	1.5378e+06
2-methylserine@1.008-rp	2.42147e+07	3.76488e+07	2.50329e+07	5.6278e+07	5.99096e+07	3.17885e+07	3.66531e+07	3.63101e+07	4.12828e+07	4.67392e+07	4.21932e+07	5.04011e+07	3.40218e+07	4.35217e+07	5.08346e+07	4.22715e+07	5.19015e+07	4.96822e+07	7.71788e+07	6.19997e+07	5.21388e+07	5.53297e+07	2.5498e+07	5.36565e+07	842123	4.81818e+07	4.2648e+07	4.31953e+07	4.66321e+07	4.71372e+07	4.38847e+07	933655	5.60816e+07	6.69042e+07	4.08518e+07	5.8251e+07	3.91648e+07	3.58487e+07
119.07358@8.09-rp	181369	414210	386293	819656	451070	176363	582520	405740	303426	387560	422653	413961	229515	766751	448020	514862	319776	368138	581947	439352	832986	771674	441733	769230	40567.7	513861	500878	433263	512792	445030	529100	33217	806464	829164	516831	436486	308925	561311
119.09459@0.978-rp	6.50553e+06	4.88831e+06	4.83242e+06	1.9824e+07	7.74705e+06	1.13792e+07	4.23529e+06	7.88609e+06	1.2898e+07	1.09107e+07	9.47263e+06	1.14024e+07	1.48205e+07	5.90275e+06	1.18457e+07	7.9806e+06	1.13359e+07	7.05347e+06	9.30218e+06	1.01479e+07	8.17649e+06	8.86372e+06	8.07772e+06	9.31434e+06	170539	1.02527e+07	1.05707e+07	9.05728e+06	1.10347e+07	1.07815e+07	1.08793e+07	222016	1.35117e+07	1.08864e+07	1.48888e+07	1.37571e+07	9.91893e+06	5.57364e+06
119.95892@0.929-rp	6.99845e+07	7.51288e+07	5.29691e+07	4.97341e+07	4.03695e+07	7.66147e+07	4.81843e+07	6.50278e+07	3.32628e+07	5.05827e+07	6.33533e+07	3.7916e+07	5.12778e+07	5.55743e+07	3.17023e+07	4.55499e+07	4.48025e+07	6.09667e+07	3.56841e+07	3.62459e+07	3.89339e+07	3.78696e+07	65964952	4.22232e+07	470728	5.29864e+07	5.66556e+07	4.82874e+07	5.40449e+07	5.22897e+07	5.99847e+07	289060	3.31307e+07	4.7504e+07	4.02537e+07	4.22712e+07	5.72863e+07	5.30641e+07
120.0091@0.834-rp	5.09326e+06	5.11997e+06	6.17125e+06	5.17334e+06	6.62931e+06	5.63068e+06	6.17844e+06	6.0061e+06	4.37986e+06	5.44243e+06	6.16141e+06	5.73746e+06	4.76049e+06	6.71092e+06	3.84202e+06	4.70103e+06	6.52208e+06	5.61325e+06	6.91813e+06	5.76073e+06	5.70524e+06	7.76538e+06	5.72162e+06	5.85613e+06	593316	5.83828e+06	6.13734e+06	5.53379e+06	6.03957e+06	5.46676e+06	5.95431e+06	649574	4.51017e+06	6.15681e+06	1.46855e+06	4.99083e+06	6.4386e+06	6.04639e+06
Erythrose@1.033-rp	6.71319e+07	8.9465e+07	83380147	1.46061e+08	1.63486e+08	9.10528e+07	1.48851e+08	9.46536e+07	1.39268e+08	1.17263e+08	1.0176e+08	1.26645e+08	9.4597e+07	1.48431e+08	1.47416e+08	1.41455e+08	1.29513e+08	1.31491e+08	1.79455e+08	1.5396e+08	1.41321e+08	1.75415e+08	7.57001e+07	1.74621e+08	594114	1.27082e+08	1.23126e+08	1.27925e+08	1.31731e+08	1.24229e+08	1.29101e+08	2.7384e+06	148409155	1.535e+08	114871324	1.21907e+08	111213594	9.56755e+07
122.03298@0.843-rp	5.40984e+06	5.45407e+06	7.07542e+06	5.39214e+06	7.86836e+06	5.50831e+06	7.56559e+06	6.75047e+06	4.50754e+06	6.49215e+06	7.14459e+06	6.75858e+06	5.83816e+06	7.6916e+06	4.09147e+06	5.6833e+06	7.49106e+06	6.83156e+06	8.48299e+06	7.174e+06	6.62387e+06	9.48353e+06	6.79993e+06	6.91351e+06	447059	6.51557e+06	6.63066e+06	6.54764e+06	6.24129e+06	5.58605e+06	6.61382e+06	507664	4.93456e+06	6.72889e+06	1.36672e+06	5.89168e+06	7.60413e+06	6.89199e+06
2-hydroxybenzaldehyde@1.457-rp	1.45564e+07	2.05504e+07	1.52773e+07	3.0191e+07	22067996	2.09297e+07	1.91958e+07	1.90133e+07	2.09757e+07	2.36011e+07	2.47215e+07	1.63189e+07	2.19506e+07	2.29136e+07	3.28271e+07	2.3655e+07	1.94938e+07	2.52176e+07	3.16408e+07	2.59873e+07	2.61689e+07	1.98697e+07	1.48484e+07	2.58115e+07	241203	2.51695e+07	2.33398e+07	2.39597e+07	2.13303e+07	2.23223e+07	2.0119e+07	129291	2.70727e+07	2.65179e+07	2.66979e+07	2.31745e+07	1.65279e+07	1.28456e+07
Niacinamide@1.816-rp	3.21554e+07	6.55502e+07	4.37041e+07	4.20607e+07	3.8511e+07	2.82074e+07	9.30412e+07	6.74703e+07	2.21167e+07	3.10918e+07	2.69695e+07	3.72082e+07	2.70757e+07	9.21735e+07	3.90209e+07	4.63772e+07	4.68154e+07	5.67825e+07	5.51604e+07	4.83982e+07	5.28589e+07	5.04666e+07	4.6428e+07	6.03242e+07	57292.5	5.54566e+07	5.99555e+07	46793432	4.75011e+07	4.77255e+07	6.11042e+07	2.05728e+06	3.63441e+07	6.33918e+07	3.32127e+07	5.04758e+07	5.22858e+07	8.99688e+07
Niacinamide@2.562-rp	3063946682	3381508672	2817800919	5582210276	4953089719	3458105778	4015855767	4721088884	3001477459	4418918293	4520377284	4299994708	3828743700	4518764173	4043317586	3776002664	4018614956	4785655218	5070652440	4537108824	4920807780	2.87071e+08	2728485360	5733485675	222489	4793795882	4409155229	4287609217	4209304102	4379623844	4506241014	1.75833e+06	4611527414	4838208929	4309172655	5139824411	4800035530	3113991637
122.58688@0.986-rp	5.50191e+06	7.9606e+06	7.89179e+06	1.24567e+07	1.16176e+07	6.45431e+06	1.2494e+07	11431584	7.80184e+06	9.70229e+06	9.34447e+06	1.08e+07	7.37099e+06	1.35157e+07	1.20627e+07	1.18226e+07	1.08048e+07	1.33348e+07	1.18217e+07	1.01901e+07	1.17988e+07	1.32028e+07	6.88409e+06	1.3113e+07	28824	1.1733e+07	1.07167e+07	1.02874e+07	1.22021e+07	9.49832e+06	1.24513e+07	30972.4	1.27664e+07	1.1831e+07	7.13751e+06	1.3705e+07	1.00986e+07	1.0217e+07
122.99905@0.999-rp	829279	923981	846067	1.12883e+06	1.02706e+06	874499	1.94541e+06	1.73004e+06	1.55177e+06	856892	1.01176e+06	2.30236e+06	1.32982e+06	1.34725e+06	1.69981e+06	2.00709e+06	2.0486e+06	2.02608e+06	3.48917e+06	1.80021e+06	3.01059e+06	1.30883e+06	1.1528e+06	2.88562e+06	30750.4	1.66858e+06	1.86303e+06	1.77143e+06	1.44408e+06	1.27893e+06	1.91494e+06	29487.8	1.93694e+06	2.92788e+06	845454	1.74914e+06	1.36067e+06	1.42949e+06
123.0083@1.037-rp	2.54325e+06	2.69915e+06	1.88248e+06	2.41819e+06	2.16207e+06	1.64891e+06	2.42234e+06	2.16669e+06	2.57879e+06	1.60473e+06	3.16646e+06	2.98012e+06	2.48568e+06	1.20814e+06	1.36895e+06	1.80606e+06	3.01574e+06	2.10269e+06	2.74656e+06	1.6399e+06	2.96521e+06	1.73483e+06	1.59784e+06	1.27399e+06	48685.7	2.65193e+06	2.2237e+06	2.29793e+06	2.12045e+06	2.3714e+06	1.81648e+06	60150.7	1.55016e+06	2.46743e+06	1.06366e+06	1.62849e+06	1.15143e+06	3.12675e+06
123.01699@0.842-rp	9.74877e+07	9.83852e+07	1.19271e+08	1.00104e+08	1.29471e+08	1.02917e+08	1.23798e+08	6.82297e+07	8.01616e+07	104548094	1.24638e+08	1.15914e+08	9.10753e+07	1.29057e+08	7.16137e+07	9.20387e+07	1.32307e+08	1.13857e+08	1.4958e+08	117175323	1.05944e+08	1.56525e+08	1.12328e+08	1.23169e+08	6.78379e+06	1.12092e+08	1.28038e+08	1.16945e+08	1.2664e+08	1.18712e+08	1.18651e+08	7.43525e+06	8.53892e+07	1.1737e+08	2.42137e+07	1.02088e+08	1.25619e+08	1.22679e+08
Isonicotinicacid@1.6-rp	1.45568e+06	1.23547e+06	1.16046e+06	2.65802e+06	2.45229e+06	2.905e+06	402930	956375	1.4656e+06	4.41968e+06	2.09186e+06	2.05419e+06	1.83205e+06	934394	1.48121e+06	2.87813e+06	2.7968e+06	2.16023e+06	6.0228e+06	2.72699e+06	1.54738e+06	1.18809e+06	1.17976e+06	3.85067e+06	20076.6	3.9092e+06	5.49108e+06	5.64735e+06	5.68763e+06	5.35109e+06	4.91888e+06	189399	2.63547e+06	1.71949e+06	3.31694e+06	2.41407e+06	1.78759e+06	589815
2-sulfoacetaldehyde@1.096-rp	741109	831510	838713	996783	920679	816382	1.44387e+06	839453	3.06664e+06	897690	1.14267e+06	1.09726e+06	3.66029e+06	1.92722e+06	2.90941e+06	1.75053e+06	2.84934e+06	2.75051e+06	3.18838e+06	2.17399e+06	3.84013e+06	1.97873e+06	2.13404e+06	2.13367e+06	35043.9	1.6589e+06	2.01068e+06	1.44787e+06	1.22102e+06	1.75624e+06	1.83478e+06	34329.5	1.37973e+06	1.62097e+06	775123	884988	1.02288e+06	934661
Phosphonoacetaldehyde@1.007-rp	4.43587e+06	6.00531e+06	5.1352e+06	7.33424e+06	7.72125e+06	4.16118e+06	1.20834e+07	4.58517e+06	8.16161e+06	7.61527e+06	7.44419e+06	8.44575e+06	6.8912e+06	6.70602e+06	1.0895e+07	7.53746e+06	6.99145e+06	8.41858e+06	6.8155e+06	7.53139e+06	6.23545e+06	1.10472e+07	4.31998e+06	5.47651e+06	33598.6	7.00777e+06	5.73144e+06	5.95054e+06	6.58273e+06	6.69551e+06	7.75451e+06	57842.3	5.88329e+06	6.6295e+06	5.18131e+06	7.11392e+06	3.98085e+06	7.6092e+06
124.01778@0.845-rp	9.35449e+06	1.00247e+07	1.16481e+07	9.84406e+06	1.31135e+07	1.01117e+07	1.19504e+07	1.10436e+07	7.81412e+06	1.06198e+07	1.22501e+07	1.18807e+07	9.01364e+06	1.28671e+07	6.85621e+06	9.14105e+06	1.28019e+07	6.7024e+06	1.53154e+07	1.14816e+07	1.03716e+07	1.61512e+07	1.11031e+07	1.21761e+07	635210	1.14414e+07	1.27658e+07	1.13663e+07	1.29307e+07	1.1404e+07	1.23656e+07	685956	7.7988e+06	1.08191e+07	2.48228e+06	1.00723e+07	1.2784e+07	1.31055e+07
124.01864@0.842-rp	1.1175e+07	1.25109e+07	1.65499e+07	1.15776e+07	1.66505e+07	1.20283e+07	1.62373e+07	1.53938e+07	9.78388e+06	1.2679e+07	1.4648e+07	1.60903e+07	1.12225e+07	1.60499e+07	8.85866e+06	1.14645e+07	1.68765e+07	1.47039e+07	1.9734e+07	15413147	1.36408e+07	2.03656e+07	1.60642e+07	1.43815e+07	723543	1.51416e+07	1.50878e+07	1.31677e+07	1.58631e+07	1.50177e+07	1.16061e+07	902615	1.09004e+07	1.41946e+07	2.34933e+06	1.3132e+07	1.06243e+07	1.60761e+07
Taurine@1.008-rp	1320914546	8.96544e+08	1880638262	1520762329	1166192593	521624097	1699628698	2089081395	2043174294	1317116045	1157842076	1997141066	2093111023	2692976681	2269607591	2456283419	2424581619	2666056075	2673988307	2157072395	2545305965	2841609124	1673797578	2311183297	1.19817e+06	2105892023	2031942646	1929807810	1949902085	1897061946	1921309223	1.15607e+07	1781483602	2020559477	1170079576	2011482067	1843672917	1645370557
125.02248@1.765-rp	956523	1.10671e+06	1.46632e+06	1.19107e+06	1.56457e+06	1.14909e+06	3.17141e+06	718532	517392	1.24111e+06	1.18597e+06	775652	836041	2.92516e+06	830957	2.99475e+06	1.51417e+06	2.03855e+06	1.48572e+06	740843	1.3494e+06	2.3899e+06	1.30523e+06	1.67097e+06	12399.1	1.42822e+06	1.52718e+06	1.43255e+06	1.48272e+06	1.67233e+06	1.40223e+06	12232	955669	1.14113e+06	860589	977355	1.64904e+06	1.25886e+06
3,6-dihydronicotinicacid@1.708-rp	422496	402449	363687	803600	433222	709505	287755	433420	592846	643164	496847	399647	546199	519367	557089	643039	716754	582088	582969	464521	476123	503250	289115	527897	44638.2	523401	489813	474097	488543	561671	536295	64218.4	583196	346120	569099	494751	486101	212503
2-hydroxyethanesulfonicacid@1.062-rp	1.57949e+07	4.86898e+06	2.32999e+07	1.4857e+07	7.88201e+06	2.67741e+06	1.53725e+07	3.68191e+07	3.72361e+07	9.59121e+06	5.67824e+06	3.04255e+07	4.6376e+07	8.42747e+07	6.14767e+07	6.99201e+07	6.27244e+07	6.04313e+07	5.76864e+07	4.01975e+07	6.94712e+07	7.07999e+07	2.44368e+07	5.80194e+07	22604.6	3.68837e+07	3.79481e+07	3.67759e+07	3.63617e+07	4.03465e+07	3.34251e+07	32054.8	3.26267e+07	3.26552e+07	2.6823e+07	4.09887e+07	2.90894e+07	2.33346e+07
2-hydroxyethanesulfonicacid@1.385-rp	126355	272863	123897	2.84118e+06	634629	1.18761e+06	316488	2.6384e+06	2.21299e+06	3.33849e+06	478420	572718	459024	2.29293e+06	6.07361e+06	660135	773812	500702	1.67451e+06	608050	1.50194e+06	1.83803e+06	717781	1.24116e+06	77081.9	975845	1.0572e+06	1.19997e+06	1.4227e+06	1.03382e+06	1.10744e+06	67689.8	1.58048e+06	3.08092e+06	613241	830186	782765	237366
2-hydroxyethylphosphonicacid@1.076-rp	6.20438e+06	1.423e+07	8.57906e+06	5.44491e+07	2.2708e+07	1.55843e+07	1.03907e+07	2.32398e+07	3.32053e+07	4.44757e+07	2.89956e+07	2.04642e+07	3.17174e+07	1.76565e+07	6.52751e+07	4.04025e+07	1.37732e+07	1.30914e+07	2.08309e+07	4.27955e+07	1.9289e+07	3.0443e+07	4.28572e+06	1.77535e+07	50170.9	2.21541e+07	2.52831e+07	2.43485e+07	2.52622e+07	2.53139e+07	2.37695e+07	49807.8	1.97481e+07	2.71911e+07	4.52945e+07	2.31111e+07	3.40095e+07	7.21281e+06
126.01785@1.017-rp	8.79357e+06	5.5604e+06	1.22895e+07	9.07143e+06	6.68064e+06	3.75143e+06	9.97697e+06	1.3561e+07	1.10875e+07	7.72639e+06	7.2536e+06	1.25173e+07	1.34308e+07	1.64071e+07	1.37966e+07	1.52625e+07	1.8023e+07	1.73437e+07	1.51259e+07	1.39058e+07	1.41471e+07	1.65924e+07	11526559	1.34325e+07	16599	1.3793e+07	1.14164e+07	1.12695e+07	1.28383e+07	1.21111e+07	1.3305e+07	97231.5	9.47802e+06	1.23712e+07	5.75257e+06	1.13149e+07	1.07164e+07	1.15579e+07
126.02515@1.207-rp	1.62755e+07	1.61566e+07	1.87034e+07	2.36753e+07	2.18426e+07	1.58021e+07	1.86453e+07	2.38769e+07	1.38081e+07	2.07762e+07	1.59512e+07	2.20581e+07	1.628e+07	1.99201e+07	1.95252e+07	2.23322e+07	2.18947e+07	2.24604e+07	2.22138e+07	1.7917e+07	2.7137e+07	2.07223e+07	1.74547e+07	2.64573e+07	48700.3	2.12955e+07	2.09996e+07	1.7773e+07	1.96668e+07	1.97758e+07	2.05659e+07	50376	2.35805e+07	2.15708e+07	1.66631e+07	2.53145e+07	1.89732e+07	1.73928e+07
5hydroxymethylfurfural@1.054-rp	3.68075e+07	5.17772e+07	3.58319e+07	7.45871e+07	6.96933e+07	5.82485e+07	4.43012e+07	4.2145e+07	4.78153e+07	6.01686e+07	5.23491e+07	4.79339e+07	4.63473e+07	4.56969e+07	4.80444e+07	5.31093e+07	5.78317e+07	5.04832e+07	4.99888e+07	6.50125e+07	4.26454e+07	5.16261e+07	4.22631e+07	6.31733e+07	369255	5.17814e+07	5.06443e+07	4.80351e+07	5.25976e+07	5.17735e+07	5.27492e+07	2.89024e+06	5.35041e+07	5.15424e+07	4.70736e+07	4.99942e+07	5.35446e+07	3.7857e+07
126.10468@9.853-rp	1.65435e+07	3.11677e+07	2.59463e+07	3.17415e+07	4.54148e+07	3.64373e+07	2.12646e+07	2.5041e+07	2.77302e+07	3.10138e+07	3.06336e+07	2.66868e+07	2.27896e+07	2.2474e+07	3.37359e+07	1.85198e+07	3.6396e+07	2.80323e+07	2.53907e+07	2.8385e+07	2.35952e+07	2.9247e+07	2.53491e+07	3.53812e+07	3.65906e+06	1.8308e+07	2.70041e+07	2.63583e+07	3.45689e+07	2.66297e+07	2.80551e+07	7.70157e+06	1.88618e+07	2.66999e+07	2.06648e+07	3.27235e+07	3.13171e+07	2.46728e+07
2-hydroxyhexdienoicacid@1.957-rp	300634	71107.8	296820	1.69822e+06	159715	380326	115931	1.18079e+06	834836	1.34084e+06	467936	177521	206121	496588	1.524e+06	380039	287697	472746	296551	259443	157871	289120	148818	312500	152348	366716	391186	472632	414410	552587	382915	339461	564276	701047	162006	408063	590921	79671
2-hydroxyhexdienoicacid@5.672-rp	246789	96976.1	312181	1.07117e+06	196242	126571	385967	682220	1.14458e+06	541023	83851.1	66874.5	167687	1.1002e+06	2.94572e+06	442664	153821	447475	421950	193576	422559	364293	77053.8	408798	203073	451892	578719	401275	463008	388272	356978	299293	432896	561447	319363	203658	169780	38310.5
4-amino-4-cyanobutanoicacid@1.051-rp	2.60221e+06	4.12454e+06	4.38779e+06	5.52609e+06	5.96447e+06	2.9024e+06	7.36146e+06	5.78888e+06	5.24355e+06	6.67373e+06	4.96244e+06	8.07838e+06	4.15232e+06	7.09773e+06	5.38212e+06	4.64468e+06	6.18324e+06	7.01136e+06	8.78507e+06	7.03911e+06	6.53731e+06	6.22207e+06	3.76028e+06	7.41464e+06	89013.5	5.70365e+06	5.28403e+06	5.22443e+06	5.80448e+06	6.07178e+06	5.7737e+06	99795.1	6.77189e+06	8.17295e+06	4.22393e+06	8.17322e+06	5.4397e+06	5.10297e+06
4-amino-4-cyanobutanoicacid@1.456-rp	1.47095e+07	1.9774e+07	1.82458e+07	2.14805e+07	1.67573e+07	1.20291e+07	2.18966e+07	2.7776e+07	2.18987e+07	2.04452e+07	2.07888e+07	2.09853e+07	1.82103e+07	3.38056e+07	1.7212e+07	2.33045e+07	25343316	2.51494e+07	2.083e+07	2.03258e+07	2.21346e+07	2.67087e+07	1.84326e+07	2.89329e+07	48197.7	2.24483e+07	2.20473e+07	2.38988e+07	2.19862e+07	2.09452e+07	2.10219e+07	24119.3	2.17534e+07	1.84593e+07	1.77169e+07	2.48026e+07	2.28648e+07	1.41308e+07
Octanal@11.76-rp	1.21998e+06	2.1828e+06	2.68019e+06	2.32814e+06	2.05754e+06	2.26553e+06	3.42906e+06	2.88355e+06	2.83542e+06	3.54062e+06	2.61582e+06	3.52434e+06	3.2204e+06	3.43195e+06	3.40189e+06	3.545e+06	3.49883e+06	3.03503e+06	3.49885e+06	2.96859e+06	2.40735e+06	3.719e+06	2.17267e+06	3.63991e+06	20269.2	2.88042e+06	3.0866e+06	3.01947e+06	3.5634e+06	3.8218e+06	3.71729e+06	625186	2.35278e+06	2.81896e+06	1.97077e+06	4.00117e+06	3.58515e+06	2.96226e+06
129.02473@1.57-rp	537583	560738	630846	1.59455e+06	797079	509899	828930	691005	915505	1.01652e+06	1.29252e+06	668331	608912	627356	961799	789332	758206	662914	1.19381e+06	545905	787128	625758	509110	1.01565e+06	43773.2	691554	754949	650915	595021	843954	640254	39057.2	565588	703109	606865	582016	607349	674971
4-oxoproline@1.009-rp	8.88637e+08	828478361	1037962323	1542986746	1548248104	8.70718e+08	1163443123	1114846229	1192729643	1283272542	9.85492e+08	1552492630	1261596141	1935623464	1371989679	1518595978	1746638075	1537821556	1474722062	1295987352	1163011446	2033103534	8.32897e+08	1525491949	611139	1434860720	1241244317	1205437224	1397960515	1279669024	1320599558	3.75758e+06	1252875969	1508278272	1048717668	1724149885	1472752379	8.03933e+08
4-oxoproline@1.449-rp	6.11324e+07	7.56727e+07	7.6844e+07	1.10979e+08	9.15035e+07	8.47526e+07	7.37578e+07	8.74991e+07	8.79687e+07	1.08493e+08	9.17652e+07	1.18911e+08	1.04402e+08	9.40509e+07	1.04285e+08	9.27884e+07	1.00933e+08	9.00707e+07	1.03881e+08	9.59502e+07	7.58874e+07	9.95278e+07	7.38427e+07	1.14197e+08	7.84375e+06	1.01038e+08	9.06438e+07	9.2609e+07	9.82751e+07	1.06511e+08	1.01119e+08	7.27257e+06	1.06671e+08	1.00747e+08	1.19031e+08	1.42484e+08	1.08254e+08	7.32134e+07
4-oxoproline@1.273-rp	6.20867e+06	6.58047e+06	6.74577e+06	9.53775e+06	7.55716e+06	6.47491e+06	1.05378e+07	1.05923e+07	8.23372e+06	8.86978e+06	8.55114e+06	7.70236e+06	7.19743e+06	9.74432e+06	7.77608e+06	9.319e+06	8.11728e+06	8.69368e+06	8.72987e+06	8.63324e+06	8.74293e+06	9.41388e+06	5.47796e+06	9.259e+06	540014	7.64057e+06	8.20272e+06	7.16336e+06	8.67448e+06	8.28097e+06	7.83759e+06	672580	1.05676e+07	7.76896e+06	8.20233e+06	5.85888e+06	8.24097e+06	6.15602e+06
4-oxoproline@1.674-rp	4.92072e+07	9.55072e+07	3.52486e+07	9.66867e+07	7.19781e+07	5.13721e+07	9.81726e+07	1.20471e+08	5.93829e+07	7.39262e+07	1.07576e+08	1.02559e+08	5.28124e+07	8.54443e+07	7.01279e+07	7.11002e+07	1.22497e+08	134299771	152219208	1.24172e+08	1.54529e+08	9.62205e+07	5.94724e+07	1.00163e+08	7.72432e+06	9.14001e+07	9.45359e+07	9.82195e+07	9.12446e+07	8.64136e+07	9.266e+07	3.7536e+06	120373888	1.28658e+08	5.4537e+07	8.22141e+07	5.24092e+07	9.77537e+07
129.05777@10.936-rp	108965	53330.2	61036.7	64125.8	61435.7	65020	549392	448756	338819	555373	579758	394850	314867	318734	349096	252735	294283	241958	719927	553385	594002	696870	306012	368928	89857.8	522725	433159	348739	401434	410865	415503	94858.5	1.00889e+06	992548	347113	651343	823560	684787
129.0578@3.079-rp	1.00186e+06	1.5126e+06	1.14995e+06	1.6621e+06	1.38947e+06	1.08349e+06	1.26541e+06	1.52929e+06	1.18723e+06	1.282e+06	1.53948e+06	1.1522e+06	1.22923e+06	1.37155e+06	1.38059e+06	1.57551e+06	1.17178e+06	1.32857e+06	1.74776e+06	1.21844e+06	1.79179e+06	1.56086e+06	952261	1.42848e+06	90168.4	1.59659e+06	1.36675e+06	1.30905e+06	1.6463e+06	1.36678e+06	1.45885e+06	89754.8	1.90747e+06	1.90522e+06	1.65299e+06	1.53819e+06	1.36179e+06	1.1789e+06
4-acetamidobutanal@1.193-rp	4.66863e+06	5.96556e+06	4.64062e+06	6.79054e+06	6.11375e+06	5.11849e+06	1.18774e+07	1.0355e+07	5.42815e+06	9.77523e+06	6.68012e+06	1.28512e+07	5.90579e+06	1.08357e+07	7.37328e+06	6.39003e+06	9.35493e+06	1.3486e+07	1.13822e+07	1.06773e+07	1.37163e+07	1.0104e+07	6.93829e+06	1.49988e+07	78856.9	1.12415e+07	1.01105e+07	8.29651e+06	1.03884e+07	1.0314e+07	7.28304e+06	102829	1.11262e+07	1.51021e+07	6.40147e+06	1.01026e+07	8.73721e+06	1.03868e+07
2,5-dioxopentanoicacid@1.174-rp	2.33646e+08	1.06846e+08	5.57685e+07	178277299	1.63114e+08	9.19907e+07	2.10536e+08	2.63483e+08	9.02131e+07	6.65931e+07	8.53656e+07	1.29085e+08	9.2157e+07	2.77449e+08	6.45516e+07	2.24099e+08	1.29661e+08	2.12992e+08	1.57888e+08	1.91741e+08	3.07361e+08	2.22185e+08	1.02912e+08	1.81955e+08	432406	2.08517e+08	1.45787e+08	1.43395e+08	1.3346e+08	122737137	1.18161e+08	778357	2.90496e+08	2.31995e+08	2.072e+08	1.77247e+08	8.50089e+07	1.30335e+08
2,5-dioxopentanoicacid@1.426-rp	3.9996e+06	5.38618e+06	3.19568e+06	4.99498e+06	4.39979e+06	4.40045e+06	7.35178e+06	4.96893e+06	3.70425e+06	5.37353e+06	4.79181e+06	4.86696e+06	4.5703e+06	6.27534e+06	6.55906e+06	6.48706e+06	4.94595e+06	8.06346e+06	1.15977e+07	3.74883e+06	1.36637e+07	5.88514e+06	4.31566e+06	6.57984e+06	90472.1	4.23637e+06	5.64892e+06	4.42826e+06	5.52567e+06	5.28072e+06	5.11291e+06	313459	5.11228e+06	7.4294e+06	3.43145e+06	5.04378e+06	2.99083e+06	5.34789e+06
2,5-dioxopentanoicacid@2.206-rp	153786	600598	641867	764656	690341	647453	779273	212545	233722	236058	787159	678439	547774	625336	207777	444721	274733	240047	763383	164591	265944	6.44358e+06	371022	94308.7	289447	531880	450739	337939	469065	389425	486537	411214	238448	793011	244946	312065	566118	290434
130.04196@9.22-rp	37031.7	42038.3	74375.7	37383.6	42813.5	46398.1	54786.3	39524.9	44333.6	44348.5	66756.7	86000.5	19424.7	57153.7	38823.4	24742.6	22402.7	40579.9	54862.7	21652.5	40039.7	55976.2	60066.7	70208.1	53375.4	301095	242718	247950	275847	254587	264712	52800.1	1.11331e+06	1.2664e+06	1.76953e+06	785050	1.96207e+06	510494
131.03711@4.841-rp	56369.3	65159.2	62414.7	188486	156787	61903.7	3.57563e+06	2.02893e+06	1.05492e+06	2.37021e+06	1.72329e+06	3.44848e+06	368748	936802	849379	580915	675778	895938	1.09607e+06	734110	735839	485638	820555	1.35273e+06	56310.6	910549	1.26425e+06	1.28948e+06	1.42427e+06	1.2189e+06	1.39566e+06	54749.3	2.31731e+06	2.12334e+06	1.32353e+06	1.27134e+06	2.60036e+06	1.99223e+06
2-amino-4-oxopentanoicacid@1.014-rp	2.93913e+06	7.2644e+06	4.50462e+06	7.31574e+06	7.21972e+06	4.22718e+06	8.81908e+06	5.31129e+06	5.57612e+06	6.01327e+06	5.79786e+06	7.064e+06	3.8368e+06	6.00343e+06	6.92316e+06	7.96889e+06	8.79944e+06	1.22351e+07	1.59354e+07	1.15263e+07	9.15113e+06	1.14667e+07	3.16094e+06	6.74136e+06	32675.2	7.8613e+06	6.50334e+06	6.33487e+06	7.74449e+06	6.54292e+06	7.01487e+06	67305.8	8.83673e+06	1.01102e+07	4.31899e+06	6.45803e+06	5.38391e+06	8.40748e+06
2-amino-4-oxopentanoicacid@1.658-rp	3.72967e+06	4.6811e+06	3.38065e+06	7.49843e+06	5.36211e+06	5.42747e+06	4.15959e+06	4.89391e+06	6.46365e+06	7.18648e+06	6.72848e+06	4.88242e+06	6.41715e+06	5.79694e+06	6.32073e+06	6.01428e+06	6.90995e+06	5.82614e+06	7.75553e+06	6.68592e+06	7.00346e+06	8.22793e+06	4.61693e+06	6.3069e+06	319209	6.11718e+06	6.31392e+06	6.07147e+06	6.18268e+06	6.0923e+06	6.15897e+06	510192	1.01223e+07	6.53176e+06	7.53504e+06	7.57756e+06	6.1873e+06	3.47303e+06
Creatine@1.064-rp	8.90164e+07	1.56731e+08	1.18666e+08	2.14603e+08	1.73433e+08	9.81179e+07	2.49493e+08	1.62004e+08	1.32727e+08	2.19003e+08	1.44223e+08	1.97281e+08	1.30572e+08	1.94246e+08	1.54428e+08	1.58387e+08	1.94214e+08	2.43449e+08	369220594	1.76085e+08	1.8799e+08	222058919	1.10199e+08	2.69786e+08	298709	175012648	1.63081e+08	1.6716e+08	1.67812e+08	1.63303e+08	173339422	515687	1.89094e+08	2.27577e+08	1.36953e+08	1.90418e+08	1.28273e+08	1.53511e+08
131.07345@3.078-rp	2.20344e+06	3.21737e+06	2.35836e+06	3.81861e+06	3.43873e+06	2.51887e+06	3.47965e+06	3.06292e+06	2.9186e+06	3.15173e+06	3.88914e+06	2.7715e+06	3.17655e+06	3.88163e+06	3.53221e+06	3.78731e+06	2.85887e+06	3.59052e+06	4.41758e+06	3.21741e+06	4.23072e+06	3.89207e+06	2.25187e+06	4.18506e+06	25737	3.90297e+06	3.7128e+06	3.15997e+06	3.84528e+06	3.29333e+06	3.53624e+06	24752.2	4.72103e+06	4.70067e+06	3.43019e+06	4.18771e+06	3.38627e+06	2.98268e+06
Alloisoleucine@1.029-rp	9.30988e+06	1.33978e+07	1.44004e+07	1.70209e+07	1.1737e+07	8.5263e+06	1.69322e+07	1.71048e+07	1.31707e+07	1.51397e+07	2.03352e+07	2.03927e+07	9.0278e+06	1.41064e+07	6.53022e+06	7.5967e+06	1.27752e+07	1.64419e+07	1.66624e+07	1.77007e+07	1.57674e+07	1.66902e+07	8.24569e+06	1.16606e+07	77437.3	1.46898e+07	1.32999e+07	1.19391e+07	1.78923e+07	1.36599e+07	1.2684e+07	113594	1.00009e+07	1.81332e+07	6.70647e+06	1.33335e+07	1.31555e+07	1.49038e+07
Alloisoleucine@1.323-rp	5.32136e+08	7.70377e+08	5.18853e+08	9.9835e+08	863784033	7.10963e+08	6.74167e+08	7.59181e+08	7.60597e+08	7.42836e+08	8.85978e+08	7.09834e+08	7.66664e+08	1024435087	8.86964e+08	8.58168e+08	8.09692e+08	8.76945e+08	1083418272	9.84662e+08	9.89775e+08	9.68234e+08	5.98226e+08	1059078248	2.08679e+07	9.69355e+08	8.05761e+08	8.47195e+08	8.92538e+08	879507657	8.62483e+08	2.15349e+07	9.74498e+08	1169843655	8.02864e+08	8.65641e+08	8.15672e+08	6.19981e+08
Alloisoleucine@7.079-rp	251417	980989	478382	879391	721580	291403	1.08428e+06	584948	635922	526210	558224	537106	422948	1.0693e+06	724170	1.13774e+06	549765	510337	996876	905387	972273	1.2137e+06	514672	927608	55451.6	779760	719223	822243	759414	669013	698868	48683.3	598566	1.10121e+06	390013	289648	576396	966811
132.02436@1.217-rp	8.24003e+07	1.02504e+08	7.67103e+07	1.44941e+08	1.23186e+08	1.15354e+08	8.03171e+07	1.18637e+08	1.2712e+08	1.63075e+08	1.35915e+08	1.11134e+08	1.38894e+08	1.18591e+08	1.63224e+08	1.34275e+08	139056210	1.5819e+08	1.86725e+08	1.62051e+08	1.7615e+08	1.59348e+08	8.99411e+07	1.61204e+08	189922	142167822	1.39328e+08	1.2452e+08	1.46078e+08	1.36926e+08	1.39136e+08	230708	1.88468e+08	1.26684e+08	1.53647e+08	155620596	1.49753e+08	7.31898e+07
2-acetolacticacid@1.717-rp	1.70946e+06	1.97693e+06	1.63185e+06	3.21223e+06	2.34389e+06	3.0616e+06	1.70573e+06	2.1182e+06	2.64472e+06	2.79527e+06	2.70852e+06	2.12703e+06	2.10986e+06	3.39852e+06	2.5242e+06	2.39149e+06	2.47859e+06	2.86915e+06	2.4712e+06	2.09907e+06	2.23606e+06	2.19991e+06	1.51453e+06	2.58091e+06	173582	2.32961e+06	2.58792e+06	2.66341e+06	2.3377e+06	2.59377e+06	2.66657e+06	110492	2.20508e+06	2.14667e+06	2.42372e+06	2.65511e+06	2.16292e+06	1.15416e+06
2-acetolacticacid@1.033-rp	2.95946e+07	2.86737e+07	3.07318e+07	6.56715e+07	5.71831e+07	5.02167e+07	4.62081e+07	3.11129e+07	5.53975e+07	5.34609e+07	4.45349e+07	4.63266e+07	3.71231e+07	4.37096e+07	5.0793e+07	4.65305e+07	4.75473e+07	4.05464e+07	5.40085e+07	4.64331e+07	4.6883e+07	5.69804e+07	2.58577e+07	5.82213e+07	933484	4.37313e+07	4.94418e+07	4.29572e+07	4.41888e+07	4.42984e+07	4.89243e+07	1.20429e+06	5.31702e+07	4.96656e+07	4.35961e+07	3.9596e+07	3.71829e+07	3.18384e+07
2-acetolacticacid@2.197-rp	1.01921e+07	1.90275e+07	7.76709e+06	2.28813e+07	1.4841e+07	1.00465e+07	1.02739e+07	1.77608e+07	1.16363e+07	9.85701e+06	1.2695e+07	1.66557e+07	1.39794e+07	1.44676e+07	2.00167e+07	1.53007e+07	2.01755e+07	3.43332e+07	5.00604e+07	3.96038e+07	3.91519e+06	2.30424e+07	2.57947e+07	3.53117e+07	96013.9	2.31108e+07	2.0509e+07	2.04841e+07	2.2362e+07	2.2143e+07	2.29767e+07	91805.7	3.53283e+07	4.56172e+07	9.76036e+06	2.22067e+07	8.94168e+06	3.60288e+07
132.05203@1.12-rp	5.4542e+06	6.30973e+06	5.91472e+06	1.23936e+07	1.10593e+07	9.4105e+06	6.0522e+06	6.04294e+06	8.94853e+06	1.0526e+07	1.02904e+07	1.03884e+07	6.89736e+06	9.26124e+06	6.36505e+06	8.01185e+06	1.3743e+07	1.6835e+07	1.25966e+07	1.14611e+07	1.02679e+07	8.03624e+06	5.07338e+06	1.71886e+07	79994.2	1.04803e+07	1.01555e+07	1.04912e+07	1.22832e+07	9.35984e+06	1.17293e+07	77378.1	1.23481e+07	1.12793e+07	819496	1.41274e+07	9.70564e+06	3.82631e+06
3-ureidopropionicacid@1.415-rp	4.03684e+06	4.80911e+06	4.31346e+06	8.61119e+06	6.49439e+06	8.56436e+06	5.74224e+06	5.43207e+06	8.33107e+06	7.994e+06	5.77202e+06	7.73099e+06	5.08764e+06	4.73432e+06	6.27931e+06	5.52632e+06	4.99664e+06	4.63663e+06	7.11828e+06	6.63699e+06	5.52524e+06	9.90707e+06	6.81377e+06	8.75776e+06	118183	7.31145e+06	6.42608e+06	5.52226e+06	6.20635e+06	6.17041e+06	7.23095e+06	53252.1	1.01335e+07	8.36996e+06	7.13573e+06	7.89798e+06	4.92941e+06	4.31358e+06
3-ureidopropionicacid@0.978-rp	2.1676e+06	2.52838e+06	2.00058e+06	2.52317e+06	3.25474e+06	2.9709e+06	2.42571e+06	2.95186e+06	4.27443e+06	2.82149e+06	3.21484e+06	2.62974e+06	2.45903e+06	2.90405e+06	3.28412e+06	2.66318e+06	3.12274e+06	2.85725e+06	5.17639e+06	2.63317e+06	3.62942e+06	4.17033e+06	2.77612e+06	3.54199e+06	226617	3.04039e+06	3.36112e+06	3.13593e+06	3.16201e+06	2.70039e+06	3.44585e+06	232319	4.37072e+06	3.66683e+06	2.51524e+06	3.69814e+06	2.95908e+06	2.31637e+06
133.01972@3.382-rp	1.28806e+06	2.48317e+06	1.53792e+06	2.65258e+06	2.38518e+06	1.85864e+06	1.29422e+06	2.79828e+06	1.56837e+06	1.84425e+06	2.02177e+06	2.91646e+06	1.59678e+06	3.3156e+06	1.9099e+06	2.52733e+06	2.45259e+06	2.88854e+06	2.96858e+06	2.89002e+06	2.81285e+06	2.64624e+06	1.76279e+06	3.26723e+06	25997.2	2.30396e+06	2.11645e+06	2.48582e+06	2.29465e+06	2.16192e+06	2.7075e+06	29281.2	2.76582e+06	3.79824e+06	1.25317e+06	3.19584e+06	1.62609e+06	2.23994e+06
Asparticacid@1.009-rp	4.62402e+07	108865353	7.47567e+07	1.06273e+08	1.31645e+08	7.96477e+07	112946052	5.6387e+07	1.02311e+08	8.78074e+07	9.27475e+07	9.42641e+07	9.81849e+07	128194384	9.97125e+07	1.10468e+08	1.06869e+08	9.66393e+07	1.28915e+08	1.17577e+08	8.05128e+07	1.32947e+08	6.7835e+07	9.38243e+07	2.06129e+06	1.12052e+08	1.09805e+08	1.08038e+08	1.06206e+08	1.01562e+08	1.13682e+08	2.79605e+06	1.46824e+08	1.57684e+08	1.33219e+08	2.3566e+08	1.20937e+08	7.78155e+07
Ureidoglycine@1.103-rp	889660	1.25304e+06	788683	1.11225e+06	830110	761167	1.50997e+06	864903	1.30485e+06	1.12566e+06	986514	1.21521e+06	1.24791e+06	943468	1.21698e+06	910399	938607	1.04187e+06	1.17569e+06	983730	1.22175e+06	1.41485e+06	886120	1.13041e+06	26113.2	971305	1.08795e+06	930175	974099	1.00646e+06	880533	25364.5	1.00092e+06	1.58758e+06	852317	1.19814e+06	740615	774564
4-hydroxyindole@4.915-rp	80579.5	92152.2	88270.9	136626	100834	87548.1	2.38736e+06	683371	968906	1.29771e+06	1.49567e+06	1.0593e+06	694485	1.00007e+06	722885	585832	641071	1.19598e+06	997901	1.06607e+06	1.11205e+06	534596	744995	1.70296e+06	85513.2	938258	843525	846455	831797	758429	861410	73454.1	992014	1.37811e+06	600673	517759	1.54549e+06	1.04354e+06
4-hydroxyindole@7.87-rp	50391.4	47846.6	52547.3	27139.9	62254.5	66915.4	741311	351862	558269	657170	133926	786444	66113.9	81808.8	31505.1	65044.9	26711.4	62325.4	61260.7	77252.2	77453.6	63041.6	74225.5	80734.6	47461	180148	178327	193863	198187	195020	194212	42018	577381	401532	224221	235210	530477	335673
133.95375@1.081-rp	1.42096e+07	1.34525e+07	1.02604e+07	5.36188e+06	6.31364e+06	1.30302e+07	1.62288e+07	6.34056e+06	7.16714e+06	6.78499e+06	8.20068e+06	6.60184e+06	8.40729e+06	5.87202e+06	5.93712e+06	6.485e+06	6.8391e+06	5.5173e+06	5.50753e+06	5.71963e+06	6.5803e+06	4.57828e+06	1.10629e+07	5.60099e+06	60149.3	7.7835e+06	7.64858e+06	4.20608e+06	7.04649e+06	6.66152e+06	6.85647e+06	20614.8	4.69514e+06	5.93851e+06	5.72001e+06	4.7951e+06	5.61981e+06	9.08705e+06
133.95381@0.962-rp	6.03559e+06	9.54129e+06	3.65981e+06	9.68891e+06	1.17924e+07	7.52627e+06	9.71601e+06	1.01312e+07	5.63037e+06	1.07411e+07	1.11484e+07	5.0198e+06	6.15413e+06	9.3179e+06	5.2809e+06	6.45605e+06	3.25552e+06	8.80904e+06	7.17291e+06	5.59487e+06	6.16214e+06	7.27335e+06	5.51629e+06	8.42275e+06	18955.6	7.95203e+06	9.1288e+06	9.29544e+06	9.03702e+06	1.02981e+07	9.7886e+06	18842	7.20977e+06	1.04589e+07	8.73364e+06	7.71755e+06	9.90795e+06	5.81742e+06
3-dehydrothreonicacid@1.18-rp	5.7186e+08	9.52492e+08	750881268	8.74367e+08	1048869851	7.99453e+08	8.09154e+08	6.56269e+08	7.37853e+08	7.06046e+08	782625553	7.86454e+08	7.66704e+08	1018993490	8.48532e+08	8.19594e+08	8.0936e+08	9.66239e+08	1032882452	8.27846e+08	8.17435e+08	1244319838	5.44305e+08	9.55192e+08	1.08852e+06	9.66005e+08	8.30211e+08	8.80028e+08	8.76242e+08	8.66081e+08	8.16504e+08	1.43229e+06	1035949797	1310381708	633898723	1216636139	1028146750	7.54804e+08
134.02271@1.488-rp	2.66156e+07	3.06604e+07	3.6636e+07	4.05003e+07	3.33462e+07	2.78874e+07	3.89574e+07	3.28127e+07	2.99095e+07	3.21973e+07	2.67921e+07	3.29908e+07	3.29335e+07	3.22818e+07	4.15359e+07	3.40315e+07	3.88806e+07	3.6737e+07	3.23456e+07	3.04115e+07	4.01622e+07	3.32987e+07	3.25279e+07	4.06826e+07	42385.3	3.64869e+07	3.20144e+07	3.30284e+07	3.55064e+07	3.4623e+07	3.16335e+07	100273	2.91076e+07	3.29382e+07	2.79221e+07	3.35316e+07	2.83548e+07	3.07169e+07
134.02279@2.623-rp	4.47923e+07	4.30547e+07	3.93028e+07	9.67668e+07	8.49363e+07	114283007	3.48075e+07	6.51319e+07	5.90761e+07	8.62684e+07	7.54561e+07	5.42904e+07	6.86714e+07	6.23396e+07	8.66596e+07	6.78443e+07	6.15043e+07	5.22301e+07	5.60865e+07	8.2228e+07	5.39499e+07	7.13185e+07	4.60921e+07	8.47618e+07	435081	7.21732e+07	6.94338e+07	6.63538e+07	7.3248e+07	8.03666e+07	6.68972e+07	50987.8	1.11156e+08	6.58861e+07	1.14175e+08	9.22466e+07	7.86822e+07	2.7344e+07
134.03842@1.185-rp	3.01568e+06	3.61767e+06	2.4719e+06	2.60866e+06	2.37404e+06	1.9345e+06	2.73126e+06	3.09901e+06	2.11601e+06	2.28319e+06	1.72795e+06	3.54281e+06	1.74083e+06	3.20766e+06	2.01719e+06	2.07099e+06	2.24162e+06	2.3794e+06	3.34229e+06	1.72012e+06	2.31338e+06	1.89904e+06	1.95413e+06	2.21987e+06	29827.9	3.28461e+06	2.14066e+06	2.02321e+06	1.94607e+06	3.0091e+06	2.12918e+06	30097.6	3.1981e+06	4.05155e+06	2.16018e+06	2.16592e+06	2.03178e+06	3.02993e+06
135.00673@2.389-rp	336602972	3.2147e+08	3.08102e+08	4.97001e+08	4.60291e+08	5.31667e+08	3.45078e+08	3.81696e+08	4.2706e+08	4.95402e+08	5.08198e+08	3.64343e+08	4.2947e+08	4.88186e+08	4.1041e+08	3.96117e+08	4.4176e+08	5.3765e+08	4.66304e+08	4.68047e+08	442172323	4.83268e+08	3.01366e+08	4.90875e+08	124085	4.82501e+08	4.56737e+08	4.3488e+08	4.41234e+08	4.35925e+08	4.33417e+08	453219	5.1271e+08	4.58978e+08	4.72769e+08	5.30654e+08	4.3911e+08	188442441
135.00676@3.248-rp	6.3801e+07	6.81862e+07	5.86285e+07	9.28145e+07	9.05719e+07	1.19246e+08	1.14722e+08	5.01923e+07	6.41583e+07	8.46926e+07	5.59584e+07	3.68532e+07	3.94617e+07	1.57831e+08	1.01056e+08	1.03622e+08	7.42867e+07	1.23942e+08	7.94116e+07	5.20374e+07	6.32418e+07	111061936	5.51001e+07	8.72211e+07	52022	7.82461e+07	7.42702e+07	7.10511e+07	7.63513e+07	7.58745e+07	7.35791e+07	50120.5	5.04939e+07	6.36154e+07	4.24426e+07	3.5665e+07	6.33423e+07	2.03593e+07
135.03201@4.402-rp	4.00699e+06	4.98507e+06	5.19769e+06	8.07915e+06	4.8526e+06	3.75927e+06	7.55374e+06	8.7212e+06	5.7834e+06	8.18193e+06	6.4413e+06	7.32767e+06	6.13985e+06	1.04997e+07	6.16667e+06	8.4751e+06	6.71241e+06	7.05062e+06	9.6495e+06	7.21997e+06	7.12763e+06	1.286e+07	5.41577e+06	1.19426e+07	89575.1	7.1994e+06	6.80931e+06	7.3442e+06	7.71667e+06	6.69254e+06	7.21533e+06	107935	5.25476e+06	6.7827e+06	5.16656e+06	5.33095e+06	7.55785e+06	4.17034e+06
4-hydroxythreonine@1.574-rp	7.8127e+06	8.56362e+06	8.86253e+06	1.12866e+07	9.49076e+06	4.76746e+06	1.29518e+07	1.12913e+07	6.97591e+06	8.64481e+06	8.62127e+06	1.11948e+07	8.41831e+06	9.9091e+06	7.44373e+06	9.73735e+06	1.01035e+07	7.66254e+06	1.06986e+07	9.74183e+06	1.12718e+07	9.81338e+06	7.58323e+06	9.87422e+06	65563.6	9.93855e+06	9.95925e+06	9.29951e+06	1.01887e+07	8.96158e+06	7.96149e+06	62643.6	7.85316e+06	1.09476e+07	7.12245e+06	8.36192e+06	8.48546e+06	1.13171e+07
Adenine@3.387-rp	8.44792e+07	1.33781e+08	8.77572e+07	1.57622e+08	1.36802e+08	1.11248e+08	8.41726e+07	1.37295e+08	9.98147e+07	1.0018e+08	1.06402e+08	1.58338e+08	7.82788e+07	1.74303e+08	1.2748e+08	1.54055e+08	1.62958e+08	1.70873e+08	1.81558e+08	1.61446e+08	1.74487e+08	154108653	8.76721e+07	1.69116e+08	73596.5	1.36485e+08	1.34184e+08	1.19775e+08	1.38612e+08	1.37436e+08	1.33201e+08	1.39963e+06	1.5316e+08	2.21981e+08	7.85108e+07	1.74621e+08	9.48763e+07	1.2417e+08
Adenine@1.564-rp	1.41498e+07	6.40251e+07	7.66866e+07	8.4832e+07	8.20714e+07	4.62905e+07	1.04678e+08	1.01064e+08	6.16314e+07	6.74008e+07	7.47099e+07	1.00843e+08	6.46307e+07	9.23791e+07	7.40928e+07	9.53771e+07	8.24104e+07	7.96356e+07	8.24993e+07	1.45064e+07	9.34788e+07	8.55678e+07	6.773e+07	8.944e+07	610655	7.73272e+07	7.7104e+07	8.09704e+07	9.19114e+07	8.47263e+07	8.74877e+07	274148	6.69414e+07	8.97818e+07	6.433e+07	8.34245e+07	8.05803e+07	9.58621e+07
Adenine@2.152-rp	4.34314e+07	5.96949e+07	4.615e+07	9.63766e+07	8.59781e+07	7.21322e+07	5.65293e+07	6.74326e+07	5.37069e+07	7.64735e+07	7.30958e+07	7.29517e+07	8.14416e+07	7.92209e+07	6.23415e+07	8.85605e+07	7.9698e+07	6.89013e+07	8.07693e+07	7.4325e+07	7.60702e+07	6.53004e+07	4.36532e+07	9.37673e+07	126138	8.09791e+07	6.92401e+07	7.78172e+07	8.11347e+07	7.11678e+07	7.78933e+07	376179	9.95975e+07	7.53772e+07	9.79107e+07	8.11815e+07	8.81562e+07	5.17501e+07
Adenine@6.231-rp	1.83012e+07	2.98667e+07	2.47274e+07	4.19021e+07	3.31438e+07	2.98514e+07	3.03839e+07	3.09136e+07	2.7304e+07	2.76663e+07	2.37554e+07	2.84094e+07	2.69163e+07	4.91517e+07	4.25969e+07	4.20678e+07	3.08272e+07	3.2796e+07	3.43682e+07	3.6364e+07	2.96409e+07	3.22389e+07	1.9703e+07	3.75656e+07	86001.7	3.31207e+07	3.15847e+07	3.01992e+07	3.04887e+07	3.28388e+07	3.08173e+07	1.54911e+06	3.0802e+07	3.16914e+07	2.75226e+07	2.88936e+07	2.90334e+07	2.27373e+07
Adenine@7.342-rp	3.28204e+06	1.99196e+06	1.93981e+06	4.27993e+06	3.21875e+06	1.64724e+06	8.52201e+06	3.26154e+06	3.55947e+06	5.26843e+06	4.88822e+06	3.3019e+06	5.17672e+06	4.66519e+06	4.69692e+06	4.45146e+06	2.72392e+06	2.84602e+06	3.55723e+06	3.35335e+06	4.22151e+06	3.43776e+06	3.11738e+06	7.24604e+06	104952	3.95005e+06	3.99507e+06	4.10872e+06	4.21064e+06	3.89503e+06	3.86335e+06	1.06844e+06	4.76879e+06	3.20853e+06	8.06611e+06	4.25607e+06	6.42876e+06	3.88507e+06
Adenine@4.298-rp	8.0562e+07	1.36743e+08	108585914	243865227	1.93092e+08	1.01293e+08	9.22227e+07	1.84683e+08	1.62839e+08	2.19875e+08	1.64638e+08	1.47501e+08	2.38636e+08	1.15015e+08	1.89293e+08	1.22289e+08	1.11155e+08	1.04534e+08	1.04708e+08	1.86265e+08	1.36442e+08	1.01114e+08	9.155e+07	1.80268e+08	155687	148878983	1.37341e+08	1.41377e+08	1.48293e+08	1.43199e+08	1.42762e+08	115315	1.16306e+08	1.81533e+08	2.22613e+08	1.84147e+08	1.24503e+08	1.15918e+08
2-phenylacetamide@1.458-rp	6.14296e+07	8.95737e+07	6.77562e+07	1.30917e+08	1.0079e+08	9.40858e+07	8.58116e+07	8.44722e+07	8.81763e+07	9.90137e+07	110961451	8.09285e+07	9.27016e+07	1.00144e+08	1.42565e+08	1.01312e+08	8.95627e+07	1.09892e+08	1.43423e+08	1.19605e+08	1.10275e+08	9.02667e+07	6.58014e+07	1.17587e+08	325706	1.09884e+08	9.76909e+07	9.64116e+07	9.59567e+07	1.02751e+08	9.27614e+07	313147	122562371	1.18153e+08	1.20983e+08	1.09614e+08	8.20126e+07	57379009
2-phenylacetamide@5.977-rp	97395.6	89388.7	44276.3	112199	52371	28360.9	39293.6	148807	74460.5	257646	153141	129875	134781	30200.9	216388	25535.9	121331	194875	329236	111610	171290	207971	134470	173873	24635.3	227720	226483	225195	223606	204858	196942	23704.3	911891	655582	662165	401564	534862	414131
135.90195@11.826-rp	364926	341782	196561	600351	1.64337e+06	850803	69945	302618	359215	160639	760759	422641	302088	304867	274016	221009	420941	682895	177106	163214	804951	230427	1.19096e+06	287301	19376	483989	564781	803735	723006	603564	557905	26026.1	471565	517154	953985	327147	81378	136777
135.93294@0.936-rp	1.83248e+08	1.89896e+08	1.88442e+08	3.12881e+08	4.61997e+08	2.38638e+08	5.06819e+08	235023737	2.78065e+08	3.3949e+08	2.94166e+08	3.59459e+08	242823489	3.55871e+08	3.04534e+08	3.5729e+08	3.36347e+08	3.12206e+08	3.95158e+08	3.55755e+08	3.30194e+08	3.86805e+08	1.899e+08	3.63991e+08	190048	3.39581e+08	3.51733e+08	2.94844e+08	3.10468e+08	3.59924e+08	3.57428e+08	158403	3.75898e+08	3.96633e+08	3.32772e+08	3.8403e+08	2.80918e+08	3.41696e+08
136.02218@0.835-rp	1.4858e+06	1.31535e+06	1.43724e+06	1.28884e+06	1.59972e+06	1.35701e+06	1.64501e+06	1.78969e+06	1.02418e+06	1.54012e+06	1.44615e+06	1.2749e+06	1.19068e+06	1.60966e+06	922643	1.23021e+06	1.51002e+06	1.31321e+06	1.85592e+06	1.51402e+06	1.32785e+06	1.8949e+06	1.46907e+06	1.499e+06	208725	1.57386e+06	1.47432e+06	1.34502e+06	1.66597e+06	1.5367e+06	1.56061e+06	228517	1.06107e+06	1.50594e+06	440301	1.53181e+06	1.54599e+06	1.56099e+06
Erythronicacid@1.067-rp	1.93064e+07	4.33231e+07	5.02074e+07	7.50981e+07	8.04845e+07	4.77661e+07	9.23083e+07	5.92154e+07	7.76297e+07	1.13187e+08	7.85595e+07	9.80676e+07	8.10661e+07	6.99876e+07	1.06381e+08	7.54774e+07	9.09092e+07	6.85526e+07	113982382	5.57066e+07	5.74334e+07	1.01645e+08	6.81757e+07	5.74987e+07	37345.3	7.24121e+07	8.13682e+07	5.54998e+07	8.17904e+07	8.80363e+07	9.28014e+07	56257.1	8.59035e+07	8.0094e+07	4.68451e+07	8.98998e+07	1.08295e+08	8.17122e+07
Hypoxanthine@2.457-rp	1657104551	1526775491	1056782741	2706035426	2499321686	4264191490	1576758523	2050463354	1807951154	2478955563	2353009209	1767534928	2593565847	2288749206	2046559120	2384292186	2228208429	2318612191	1514631499	2268851189	2138469597	2031330253	1595025911	2705219370	129829	3041373879	2190370309	2257945589	2069045619	2187050176	2160190562	1.48735e+06	3546689690	1179811499	3206983019	5759017475	2774386717	787981530
Hypoxanthine@1.52-rp	5.99454e+07	5.52664e+07	5.41716e+07	6.79702e+07	5.01532e+07	4.87402e+07	7.22543e+07	4.88477e+07	7.36115e+07	6.0211e+07	6.83253e+07	6.05083e+07	6.86827e+07	1.04016e+08	7.22139e+07	9.04074e+07	9.93578e+07	1.10126e+08	9.20592e+07	6.03027e+07	5.87163e+07	8.45405e+07	7.01588e+07	8.68056e+07	1.68304e+06	8.0576e+07	7.54964e+07	7.292e+07	6.48966e+07	7.62179e+07	8.17336e+07	1.83426e+06	8.23446e+07	9.32462e+07	8.95704e+07	1.11936e+08	8.87997e+07	5.00776e+07
Hypoxanthine@2.389-rp	3053868339	2803182096	1973630575	5252162435	4464346661	5761418434	2276487339	3417668881	3419784545	4575086683	4362822282	3126599003	3983509289	4115325760	3736356050	3975117790	3984132599	4212561005	3154019661	4054421512	4041036706	3671368363	2750245864	4982829344	354207	4646404233	3998609234	3977032775	3818101731	3990235754	4056135606	1.80132e+06	5863662800	2947632539	4801410249	5541246999	4262312131	1594904309
Hypoxanthine@4.317-rp	2.10617e+06	3.48323e+06	4.07278e+06	6.48788e+06	2.76418e+06	3.08774e+06	2.26242e+06	3.10068e+06	1.65152e+06	2.62278e+06	1.74768e+06	3.12972e+06	1.63367e+06	5.9462e+06	2.51786e+06	3.45796e+06	3.1816e+06	4.33116e+06	3.27747e+06	1.86375e+06	2.76085e+06	3.10192e+06	3.22688e+06	3.51881e+06	52746.6	2.29929e+06	2.46791e+06	2.69682e+06	2.654e+06	4.05497e+06	2.49259e+06	125931	1.74296e+06	3.05094e+06	2.23735e+06	1.44105e+06	1.43596e+06	1.96265e+06
2-hydroxyacetophenone@4.364-rp	6.09047e+06	9.70373e+06	6.59337e+06	1.38249e+07	1.07403e+07	7.94892e+06	1.78949e+07	1.02917e+07	9.30923e+06	1.01708e+07	1.15938e+07	8.6939e+06	5.46247e+06	1.13708e+07	8.97897e+06	1.04816e+07	9.14768e+06	1.41193e+07	1.98197e+07	1.42338e+07	1.78716e+07	1.35069e+07	6.20791e+06	1.8094e+07	204240	1.127e+07	1.12216e+07	1.14342e+07	1.12789e+07	1.08087e+07	1.14858e+07	307580	1.18573e+07	1.36514e+07	6.74904e+06	5.94555e+06	5.57745e+06	1.24914e+07
1-methylnicotinamide@1.035-rp	3.13915e+06	2.69853e+06	2.7188e+06	5.93978e+06	5.20273e+06	3.52416e+06	5.73109e+06	5.26633e+06	5.7004e+06	8.05189e+06	6.24965e+06	3.97359e+06	7.20322e+06	6.12369e+06	6.78066e+06	5.56607e+06	3.09641e+06	3.51974e+06	5.17788e+06	6.49944e+06	4.30707e+06	5.62951e+06	2.88063e+06	6.77586e+06	15157.7	5.87576e+06	5.09893e+06	4.71657e+06	4.96682e+06	5.04055e+06	5.48452e+06	24565.2	4.77137e+06	4.89723e+06	6.8201e+06	3.83635e+06	7.69398e+06	3.85138e+06
136.08118@2.443-rp	190500	5.43259e+06	171825	8.49395e+06	6.51331e+06	2.79687e+06	1.18473e+06	3.75789e+06	6.30416e+06	4.52776e+06	2.46057e+06	5.59551e+06	5.58857e+06	766735	295934	354576	326393	5.43325e+06	5.92171e+06	8.04179e+06	279214	430808	618947	392631	14375.6	3.79834e+06	288643	4.8659e+06	3.63885e+06	336280	4.51212e+06	16541.9	6.64416e+06	3.13346e+06	8.06949e+06	3.95444e+06	627890	2.78581e+06
137.02235@2.322-rp	742450	712044	458307	1.65857e+06	1.09671e+06	3.32645e+06	532454	547423	895767	996981	1028182	702117	907218	645853	982262	934368	1.1429e+06	1.01295e+06	1.09179e+06	1.15456e+06	1.07695e+06	1.01969e+06	655541	1.30274e+06	24837.7	1.07426e+06	873450	1.07584e+06	1.01055e+06	1.02355e+06	1.20323e+06	26001.6	1.49782e+06	1.01965e+06	1.19988e+06	1.17677e+06	990815	351436
137.02239@2.446-rp	746135	837937	595844	1.76887e+06	1.70727e+06	1.87069e+06	800775	1.26667e+06	1.11503e+06	1.832e+06	1.97076e+06	1.63532e+06	1.14914e+06	1.56304e+06	1.33709e+06	1.25139e+06	1.25685e+06	1.48227e+06	1.38648e+06	1.36931e+06	1.39786e+06	1.15935e+06	858763	1.49018e+06	31643.8	1.40888e+06	1.79601e+06	1.30515e+06	1.44181e+06	1.25266e+06	1.40898e+06	36412.2	2.36722e+06	1.21707e+06	1.62828e+06	1.47722e+06	1.53254e+06	568805
137.03548@2.426-rp	3.77325e+07	3.47968e+07	2.55271e+07	6.63094e+07	5.81855e+07	7.15625e+07	2.7293e+07	4.65459e+07	4.15235e+07	5.68904e+07	5.52753e+07	3.95192e+07	5.05189e+07	5.019e+07	4.75895e+07	4.60732e+07	5.14093e+07	5.16168e+07	5.35696e+07	5.18429e+07	5.00796e+07	4.68525e+07	3.36387e+07	5.451e+07	39269.6	5.89657e+07	4.86963e+07	4.91553e+07	4.71411e+07	5.08645e+07	5.11937e+07	47744.7	7.20386e+07	5.38752e+07	5.61237e+07	4.84569e+07	5.50863e+07	19376143
137.04143@2.395-rp	1.43222e+08	1.30718e+08	101808333	2.48464e+08	2.12275e+08	2.72092e+08	1.05815e+08	1.67315e+08	1.57967e+08	2.1263e+08	2.05256e+08	1.46575e+08	1.84035e+08	191632693	1.7395e+08	188100301	1.90061e+08	1.97566e+08	216766756	1.90781e+08	1.90029e+08	1.76714e+08	1.31188e+08	2.34746e+08	68769.3	2.09574e+08	188812090	1.85492e+08	1.80946e+08	1.86999e+08	1.90933e+08	98772.3	2.74132e+08	1.96879e+08	225434120	3.12724e+08	2.01984e+08	7.42347e+07
2-pyridylaceticacid@1.189-rp	4.96399e+07	6.07239e+07	7.18788e+07	8.92666e+07	8.14625e+07	5.55725e+07	1.002e+08	1.00257e+08	7.68153e+07	9.76164e+07	7.51232e+07	1.1122e+08	8.05494e+07	8.89823e+07	8.45938e+07	9.80482e+07	8.69568e+07	1.23212e+08	121614514	1.08965e+08	132491842	1.15821e+08	6.69513e+07	1.40157e+08	46900.5	9.11105e+07	9.52001e+07	8.6277e+07	9.40281e+07	9.62199e+07	9.58239e+07	69981.9	1.23019e+08	1.1068e+08	7.82933e+07	9.6626e+07	1.07708e+08	8.69902e+07
2-pyridylaceticacid@6.488-rp	91475	219909	258560	171555	209264	172505	232866	201511	370751	394773	249610	188649	477496	164851	522013	157897	276630	131741	218807	189911	177219	265745	194115	244363	32161.8	221958	259857	249800	283081	274815	253865	58366.3	146384	224062	151363	284744	271070	244139
2-aminonicotinicacid@1.792-rp	1.31424e+06	853854	1.18267e+06	1.17119e+06	1.26864e+06	985256	1122968	567012	963311	874423	1.91203e+06	4.41586e+06	2.68681e+06	779789	366346	484642	2.30006e+06	2.44801e+06	1.37635e+06	1.99778e+06	1.59134e+06	1.22022e+06	1.0825e+06	3.47184e+06	104641	1.88932e+06	1.68161e+06	1.62912e+06	1.46637e+06	1.63246e+06	1.63385e+06	181556	592363	2.14542e+06	2.90114e+06	2.08246e+06	685367	987526
2-aminonicotinicacid@3.214-rp	898625	701306	1.02765e+06	1.98031e+06	1.19178e+06	900291	557439	762995	1.01382e+06	1.47759e+06	1.48831e+06	1.82104e+06	1.42501e+06	463690	749948	1.44945e+06	1.90594e+06	2.08633e+06	2.71923e+06	2.02664e+06	2.09894e+06	1.26655e+06	781717	2.34926e+06	206251	1.7418e+06	1.46755e+06	1.24292e+06	1.48719e+06	1.32508e+06	1.45194e+06	229686	2.03279e+06	1.2791e+06	1.89987e+06	1.65672e+06	1.01855e+06	616619
2-aminonicotinicacid@3.431-rp	546394	599524	694188	1.009e+06	741763	488488	973087	918529	798997	938093	957692	871396	935712	1.11801e+06	662184	1.24098e+06	534694	807104	981245	962319	796559	961564	319580	982068	130783	847025	857580	855465	684024	749562	689063	148720	730865	756843	900638	658671	776809	465012
3,6-nonadienal@11.641-rp	2.21301e+06	6.49887e+06	4.64244e+06	6.2489e+06	4.12098e+06	6.8854e+06	7.8901e+06	4.74409e+06	6.77992e+06	7.49107e+06	4.80069e+06	4.62003e+06	6.11475e+06	5.8192e+06	7.29947e+06	6.86912e+06	7.88659e+06	7.23375e+06	7.51499e+06	4.80814e+06	6.05904e+06	8.13613e+06	4.62342e+06	5.80215e+06	247340	6.22724e+06	4.10382e+06	4.74019e+06	5.27427e+06	7.56527e+06	7.7884e+06	707790	2.54303e+06	2.91709e+06	2.52759e+06	8.74798e+06	4.25748e+06	7.93685e+06
2-hydroxynicotinicacid@3.203-rp	165526	120260	192243	349982	186003	235702	124588	170862	261661	274775	264496	304684	234630	72097.2	165580	237129	333856	341909	763373	340440	344015	221025	170150	439983	29645	302659	246237	220586	218536	252151	280825	76019.3	370173	235949	332826	338761	249857	94478.6
139.06346@6.49-rp	867752	1.95656e+06	2.28796e+06	1.61315e+06	2.46334e+06	1.40921e+06	2.10572e+06	1.69662e+06	3.78338e+06	3.52971e+06	2.47042e+06	2.31833e+06	4.82612e+06	1.75077e+06	5.737e+06	1.77771e+06	2.50693e+06	1.50348e+06	2.79524e+06	2.27646e+06	1.58101e+06	2.31874e+06	2.24075e+06	2.37577e+06	17404	2.69226e+06	2.75654e+06	2.16928e+06	2.15898e+06	2.16686e+06	2.57859e+06	18482.9	1.74119e+06	1.79026e+06	2.0531e+06	2.45683e+06	2.93833e+06	2.12832e+06
Acetylphosphate@1.069-rp	6.50584e+07	7.60686e+07	7.33642e+07	6.80534e+07	8.22549e+07	7.8592e+07	1.04378e+08	6.37268e+07	5.71901e+07	7.74527e+07	5.78493e+07	7.16618e+07	5.84037e+07	8.36813e+07	7.24478e+07	8.99598e+07	8.43496e+07	7.32703e+07	7.6316e+07	5.79318e+07	6.2826e+07	8.57021e+07	7.38265e+07	6.53183e+07	192870	7.56661e+07	7.28267e+07	6.89448e+07	6.87753e+07	7.05142e+07	7.25156e+07	375457	7.51066e+07	7.30667e+07	5.41274e+07	6.03528e+07	6.61809e+07	7.68341e+07
4-carboxymethylenebutenolide@1.229-rp	8.14865e+06	3.4725e+06	1.37381e+06	4.31013e+06	4.49157e+06	2.58844e+06	5.16134e+06	5.26019e+06	1.5214e+06	1.6953e+06	1.44052e+06	2.46414e+06	1.94683e+06	7.6456e+06	1.03045e+06	5.93322e+06	2.74442e+06	6.83754e+06	3.21805e+06	5.47751e+06	8.47866e+06	6.57966e+06	2.81362e+06	5.41495e+06	30142.4	4.94882e+06	4.29643e+06	3.2954e+06	3.3547e+06	2.72898e+06	2.59753e+06	65536.2	6.33178e+06	7.40604e+06	3.72483e+06	4.62794e+06	1.72406e+06	3.03931e+06
140.04351@0.846-rp	5.30995e+07	5.40261e+07	6.70065e+07	5.62241e+07	7.43201e+07	5.9218e+07	6.82314e+07	1.85408e+07	4.46785e+07	5.65708e+07	7.28059e+07	6.22304e+07	4.89345e+07	7.14039e+07	3.91808e+07	5.06584e+07	7.70843e+07	6.32045e+07	8.43699e+07	6.58366e+07	5.96367e+07	8.75101e+07	6.46865e+07	7.3034e+07	5.04807e+06	6.32176e+07	7.53822e+07	6.72989e+07	7.2063e+07	6.72411e+07	6.61163e+07	5.8262e+06	4.62327e+07	6.44937e+07	1.18805e+07	5.53991e+07	7.05415e+07	6.63959e+07
140.04424@0.846-rp	702126	719529	877357	756026	1.05216e+06	739437	851760	750536	610261	761474	851166	742885	622887	939029	473414	787616	894985	701286	1.2549e+06	929001	862019	1.12792e+06	754585	914386	178053	802451	870188	608123	867439	811825	915308	194936	592477	919975	143579	782437	880891	928840
1-methylimidazoleaceticacid@1.176-rp	1.38313e+06	2.38799e+06	1.71557e+06	2.47426e+06	2.50327e+06	1.68202e+06	5.5813e+06	3.49391e+06	2.5793e+06	6.07107e+06	8.94637e+06	6.42489e+06	2.35271e+06	4.05941e+06	3.85703e+06	3.59039e+06	3.24868e+06	3.79352e+06	4.97029e+06	7.00096e+06	6.66351e+06	4.5585e+06	7.03553e+06	6.74898e+06	162267	4.20478e+06	4.03139e+06	4.13687e+06	5.16267e+06	4.62651e+06	4.81405e+06	271922	4.91226e+06	5.69566e+06	5.04994e+06	3.73131e+06	4.64826e+06	6.31809e+06
141.02469@1.265-rp	1.11976e+07	1.36975e+07	8.49232e+06	1.37309e+07	1.21698e+07	1.20834e+07	2.32347e+07	1.59114e+07	1.26498e+07	1.69583e+07	1.95682e+07	2.12695e+07	1.67881e+07	1.8709e+07	1.41535e+07	1.94296e+07	1.60068e+07	1.80033e+07	1.96686e+07	1.84716e+07	1.70574e+07	1.8258e+07	1.12548e+07	1.71324e+07	337023	1.49134e+07	1.56448e+07	1.74463e+07	1.66379e+07	1.61525e+07	1.60994e+07	373853	2.04564e+07	1.5568e+07	1.84505e+07	2.28029e+07	1.55715e+07	1.60377e+07
141.02556@1.259-rp	2.42061e+06	4.70554e+06	2.51472e+06	4.82546e+06	4.06885e+06	4.19974e+06	2.89279e+06	2.90889e+06	2.73248e+06	4.81584e+06	5.66018e+06	6.47279e+06	4.8665e+06	3.68813e+06	4.61327e+06	6.9213e+06	5.11434e+06	5.29518e+06	6.0311e+06	6.08689e+06	6.85321e+06	5.87167e+06	2.74493e+06	5.3691e+06	160723	2.84178e+06	4.62568e+06	3.77428e+06	5.87151e+06	4.9802e+06	5.1202e+06	180815	6.23661e+06	3.53984e+06	5.52918e+06	6.54836e+06	5.43155e+06	5.46253e+06
141.0276@0.828-rp	1.8402e+08	1.58802e+08	2.22043e+08	1.85108e+08	2.4347e+08	1.76238e+08	227893551	1.31494e+08	154470060	198865142	2.28225e+08	2.17397e+08	1.76131e+08	2.32133e+08	1.34855e+08	1.60801e+08	2.19418e+08	1.94534e+08	2.36003e+08	2.15011e+08	1.97651e+08	2.88241e+08	1.84525e+08	2.0178e+08	1.23031e+07	1.85795e+08	235534574	2.14547e+08	1.97638e+08	2.17146e+08	1.99735e+08	1.24493e+07	1.66914e+08	2.17553e+08	4.90491e+07	1.89438e+08	2.3838e+08	2.09588e+08
2-aminomuconicacidsemialdehyde@1.713-rp	8.38037e+06	8.07221e+06	7.83109e+06	1.46043e+07	1.26699e+07	1.28013e+07	7.76717e+06	9.73589e+06	1.10578e+07	1.2527e+07	9.76213e+06	8.59812e+06	1.067e+07	1.11956e+07	1.18504e+07	1.15674e+07	1.10274e+07	1.25263e+07	1.14116e+07	1.11137e+07	1.05473e+07	9.77501e+06	6.31493e+06	1.16546e+07	41168.6	1.12395e+07	10532725	9.74218e+06	1.02057e+07	1.04359e+07	1.10739e+07	157675	1.15103e+07	8.76194e+06	1.15805e+07	1.00449e+07	8.7651e+06	4.40066e+06
141.05781@3.074-rp	564749	874258	621220	1.04853e+06	909356	590507	1.01902e+06	784545	796074	770608	930646	794262	822421	1.06271e+06	845040	1.04189e+06	741006	1.19591e+06	1.48561e+06	867707	1.21176e+06	1.11219e+06	669540	1.17212e+06	24941.5	1.15572e+06	1.00221e+06	875893	968828	958038	1.00087e+06	23987.2	1.22099e+06	1.21443e+06	1.00233e+06	1.14941e+06	905357	834844
141.94081@0.94-rp	1.03284e+08	1.11138e+08	6.62512e+07	5.11467e+07	3.09996e+07	1.06273e+08	4.71072e+07	9.00997e+07	2.82555e+07	5.29775e+07	7.83156e+07	3.31541e+07	5.9951e+07	6.05545e+07	2.58213e+07	3.89853e+07	3.67747e+07	6.76544e+07	2.85879e+07	3.02732e+07	4.12248e+07	3.06837e+07	8.38339e+07	3.96984e+07	960642	5.49255e+07	5.5867e+07	4.90981e+07	5.24364e+07	5.16087e+07	5.71151e+07	543903	2.83675e+07	4.503e+07	4.03113e+07	3.54564e+07	6.07619e+07	5.20574e+07
142.01155@0.843-rp	135039882	1.32215e+08	1.56213e+08	1.24813e+08	1.78901e+08	133520594	1.68336e+08	1.56054e+08	1.10854e+08	1.40972e+08	1.60667e+08	1.63124e+08	1.27761e+08	1.73044e+08	9.44881e+07	1.25129e+08	1.72637e+08	1.54726e+08	2.05864e+08	160873273	1.52125e+08	214217054	1.4379e+08	1.54284e+08	9.33532e+06	1.51297e+08	148618729	1.54478e+08	1.6426e+08	1.59448e+08	1.67199e+08	1.07706e+07	1.13886e+08	1.52173e+08	3.31952e+07	1.37283e+08	1.71426e+08	1.71307e+08
142.02429@0.909-rp	6.84684e+08	607145296	6.12692e+08	4.18942e+08	4.18933e+08	5.95632e+08	4.86175e+08	5.87591e+08	5.06697e+08	5.36408e+08	5.71174e+08	4.68845e+08	5.62761e+08	5.1008e+08	4.11068e+08	4.7477e+08	4.85412e+08	6.06044e+08	4.37869e+08	4.36395e+08	4.52179e+08	4.15343e+08	6.63407e+08	4.25337e+08	1.00919e+08	5.14426e+08	5.66169e+08	5.27789e+08	5.54374e+08	5.36312e+08	5.04163e+08	9.40218e+07	3.84741e+08	4.9189e+08	4.70926e+08	4.15797e+08	4.94668e+08	5.50692e+08
142.02833@0.833-rp	2.99019e+07	2.98994e+07	3.53357e+07	2.84468e+07	3.85639e+07	2.9405e+07	3.72487e+07	3.31077e+07	2.45649e+07	3.17087e+07	3.44252e+07	3.33069e+07	2.9041e+07	3.75134e+07	2.17361e+07	2.83459e+07	3.62684e+07	2.948e+07	4.39933e+07	3.48283e+07	3.16282e+07	4.60986e+07	3.22283e+07	3.34455e+07	1.72373e+06	3.52838e+07	3.61073e+07	3.26328e+07	3.5354e+07	3.346e+07	3.61851e+07	1.83688e+06	2.62128e+07	3.44196e+07	8.56176e+06	3.05999e+07	3.76621e+07	3.62635e+07
142.02903@0.829-rp	2.45447e+07	2.37273e+07	2.83946e+07	2.25449e+07	3.08402e+07	2.37399e+07	3.03258e+07	2.63449e+07	1.99395e+07	2.53111e+07	2.76175e+07	2.75865e+07	2.3862e+07	2.93486e+07	1.79569e+07	2.30351e+07	2.88463e+07	2.7486e+07	3.49957e+07	2.80526e+07	2.53753e+07	3.65816e+07	2.58625e+07	2.66804e+07	1.37129e+06	2.85951e+07	2.88573e+07	2.61433e+07	2.8209e+07	2.65462e+07	2.86364e+07	1.38305e+06	2.23021e+07	2.79469e+07	7.60865e+06	2.46152e+07	3.01931e+07	2.86697e+07
142.06308@5.335-rp	465395	537043	242410	571168	559027	615687	217107	79439.5	787291	463414	563809	736356	1.71855e+06	2.46698e+06	948568	3.94118e+06	991257	2.58363e+06	183251	354738	569216	2.95446e+06	569476	673976	266416	689061	587286	566702	532167	584307	472022	592670	422752	577410	497535	601795	579837	643434
Ectoine@1.15-rp	2.48407e+06	3.06986e+06	2.49701e+06	3.70398e+06	4.4419e+06	2.41968e+06	6.52978e+06	5.51697e+06	4.00525e+06	6.21076e+06	5.69597e+06	6.4839e+06	3.98028e+06	5.06476e+06	4.15557e+06	3.22373e+06	3.56511e+06	6.56031e+06	8.0342e+06	4.86076e+06	7.06405e+06	4.73536e+06	3.25312e+06	8.01223e+06	76574	5.27694e+06	5.80316e+06	4.55346e+06	5.0208e+06	4.98953e+06	5.24058e+06	76481.4	7.24226e+06	7.73492e+06	5.44316e+06	6.29556e+06	6.47134e+06	6.62458e+06
143.02512@0.829-rp	1.59993e+07	1.60013e+07	1.88087e+07	1.55637e+07	2.02464e+07	1.63553e+07	1.91404e+07	1.85896e+07	1.33947e+07	1.70997e+07	1.9014e+07	2.02883e+07	1.53295e+07	1.96867e+07	1.13803e+07	1.54959e+07	2.01983e+07	1.95376e+07	2.27848e+07	1.81331e+07	1.6712e+07	2.43881e+07	1.67986e+07	1.76739e+07	902364	1.89569e+07	1.91173e+07	1.73133e+07	1.94965e+07	1.75747e+07	1.89163e+07	907461	14893958	1.84199e+07	3.97965e+06	1.60857e+07	2.05152e+07	1.95632e+07
143.05813@1.05-rp	6.09723e+06	1.59767e+07	7.59071e+06	1.78284e+07	1.31369e+07	8.91312e+06	9.84673e+06	8.71987e+06	6.24737e+06	1.04163e+07	9.45653e+06	1.26746e+07	6.55913e+06	1.07697e+07	7.56909e+06	7.89119e+06	1.16042e+07	1.36377e+07	1.48028e+07	1.25148e+07	1.18513e+07	1.23008e+07	7.99841e+06	1.6592e+07	86048.7	9.97988e+06	1.22645e+07	9.48896e+06	1.09567e+07	1.10182e+07	1.13131e+07	297405	1.50774e+07	1.78044e+07	6.74954e+06	1.35987e+07	7.97291e+06	1.17087e+07
143.05815@2.522-rp	4.53094e+06	6.63166e+06	6.57789e+06	8.19083e+06	6.11065e+06	5.68295e+06	5.22405e+06	4.89544e+06	4.16737e+06	4.71228e+06	6.19305e+06	4.69587e+06	4.90706e+06	9.27378e+06	6.30192e+06	7.67297e+06	8.16692e+06	7.85687e+06	7.86634e+06	7.53293e+06	9.57349e+06	9.62276e+06	4.5884e+06	8.58141e+06	71610.8	6.08338e+06	6.89993e+06	5.45327e+06	6.31119e+06	5.76804e+06	6.19917e+06	271272	5.4759e+06	6.87463e+06	2.99732e+06	5.48835e+06	4.24835e+06	4.08381e+06
143.05817@4.51-rp	459180	864110	392970	1.23272e+06	1.71564e+06	806455	1.1872e+06	1.22649e+06	1.52757e+06	1.41727e+06	3.2617e+06	1.20099e+06	1.01068e+06	1598235	1.51464e+06	1.86488e+06	1.45276e+06	888046	2.33295e+06	2.20168e+06	1.70831e+06	3.67491e+06	1.23296e+06	1.92165e+06	128346	1.5652e+06	1.50648e+06	1.46421e+06	1.51989e+06	1.40619e+06	1.36512e+06	494882	1.77447e+06	833497	1.07175e+06	1.37533e+06	2.22143e+06	695294
1-naphthylamine@3.079-rp	7.54916e+06	1.09655e+07	8.27332e+06	1.33894e+07	1.19359e+07	8.7821e+06	12093044	1.07774e+07	9.72255e+06	1.07214e+07	1.38764e+07	9.90033e+06	1.11787e+07	1.40811e+07	1.21548e+07	1.33344e+07	1.04212e+07	1.30115e+07	1.61868e+07	1.14121e+07	1.52458e+07	1.45602e+07	8.10245e+06	1.3777e+07	43451	1.36176e+07	1.25209e+07	1.16409e+07	1.28871e+07	1.23406e+07	1.26241e+07	45299.1	1.67899e+07	1.58673e+07	1.24705e+07	1.49638e+07	1.21811e+07	1.06836e+07
Homocycloleucine@1.232-rp	1.49998e+07	2.323e+07	2.86683e+07	2.65928e+07	2.31053e+07	2.05179e+07	3.16202e+07	3.85579e+07	2.19613e+07	3.17814e+07	2.91339e+07	3.36287e+07	1.98587e+07	2.71519e+07	1.76501e+07	1.70346e+07	2.2666e+07	3.1425e+07	3.15738e+07	2.89225e+07	4.45087e+07	3.60161e+07	1.23935e+07	2.1743e+07	120434	2.91242e+07	2.81765e+07	2.45769e+07	2.61262e+07	2.48622e+07	2.48183e+07	125789	1.27553e+07	2.61579e+07	1.27136e+07	3.25161e+07	2.18235e+07	17773625
144.00584@1.134-rp	6.91635e+06	8.11121e+06	7.42821e+06	1.08012e+07	1.48097e+07	8.33071e+06	1.54868e+07	1.46677e+07	1.09733e+07	1.15497e+07	1.1298e+07	7.75733e+06	1.0091e+07	1.1085e+07	8.71326e+06	8.92043e+06	1.11938e+07	1.30048e+07	1.09687e+07	1.25747e+07	1.00703e+07	1.42822e+07	8.29678e+06	1.34753e+07	33823	1.19472e+07	1.19411e+07	1.11258e+07	1.10371e+07	1.08958e+07	9.79205e+06	33970.3	9.00658e+06	8.21424e+06	1.05018e+07	7.58601e+06	6.85351e+06	7.53834e+06
144.00586@1.432-rp	1.66417e+06	1.70689e+06	1.69683e+06	3.06785e+06	2.74334e+06	1.39386e+06	2.98222e+06	2.70463e+06	3.47298e+06	3.31e+06	2.06706e+06	1.88859e+06	3.66256e+06	2.29062e+06	4.13209e+06	3.70507e+06	2.40873e+06	2.40774e+06	3.39986e+06	2.82876e+06	2.37545e+06	3.1431e+06	1.54735e+06	3.13815e+06	59576	3.03167e+06	2.22892e+06	2.67758e+06	2.76792e+06	2.54286e+06	2.52398e+06	47291.1	2.90646e+06	2.33456e+06	1.71075e+06	2.97159e+06	1.9062e+06	1.23349e+06
2-methyleneglutaricacid@1.057-rp	6.97415e+07	1.12423e+08	7.13342e+07	130026755	1.1983e+08	1.09058e+08	7.52695e+07	7.8872e+07	7.40892e+07	9.38436e+07	8.27636e+07	8.81855e+07	6.92946e+07	8.55645e+07	7.42605e+07	8.19194e+07	1.04527e+08	1.03418e+08	1.07709e+08	1.19065e+08	8.72576e+07	8.66796e+07	8.02928e+07	1.13852e+08	1.0313e+06	9.55872e+07	8.84062e+07	9.12992e+07	9.43469e+07	9.41024e+07	9.68359e+07	2.44344e+06	1.24815e+08	1.21702e+08	8.13066e+07	1.01165e+08	9.40151e+07	8.31411e+07
144.05326@1.001-rp	2.60932e+06	3.54477e+06	2.27831e+06	5.30315e+06	4.05248e+06	2.11309e+06	3.57602e+06	3.73052e+06	3.5747e+06	4.07864e+06	4.00341e+06	3.80331e+06	1.62335e+06	3.86933e+06	3.83769e+06	2.98544e+06	5.97808e+06	5.63983e+06	8.68992e+06	7.17472e+06	5.9707e+06	4741331	2.60812e+06	5.15567e+06	51970	4.80244e+06	3.57165e+06	3.88305e+06	4.79552e+06	4.72081e+06	4.56958e+06	90492.7	5.96302e+06	7.33208e+06	1.73181e+06	4.02022e+06	2.16278e+06	4.3297e+06
144.09392@10.569-rp	93252.6	204377	308391	311476	390843	208107	590082	94178.6	142025	297719	298651	526677	267315	50497.4	311176	228115	403197	306999	510226	128844	103457	240755	183267	619477	44674.2	230922	338839	317464	404708	429665	479084	113303	118879	144685	276172	534275	418342	506541
8-hydroxyquinoline@7.576-rp	58387.6	45178.2	46808.2	57545.7	77920.3	63517.2	611425	392254	248083	718804	726890	652465	177362	574592	378640	211919	467346	304044	1.02535e+06	713451	335910	794369	508841	513018	18233.9	395656	406436	357658	367083	328797	337683	22634.9	361259	483528	72716.1	105253	105290	95828.9
8-hydroxyquinoline@3.078-rp	1.20806e+07	1.77523e+07	1.26872e+07	2.20984e+07	1.9413e+07	1.46257e+07	1.9334e+07	1.77776e+07	1.65831e+07	1.59058e+07	2.22753e+07	1.63566e+07	1.77801e+07	2.25604e+07	1.94261e+07	2.22154e+07	1.80447e+07	1.97867e+07	2.56782e+07	1.82343e+07	2.4161e+07	2.32574e+07	1.32051e+07	2.45909e+07	25992.6	2.19542e+07	1.99681e+07	1.76888e+07	2.0912e+07	1.84401e+07	2.04956e+07	47166.6	2.62444e+07	2.56743e+07	1.87855e+07	2.32725e+07	1.97536e+07	1.71499e+07
8-hydroxyquinoline@2.105-rp	824119	2.86652e+06	1.12698e+06	3.36147e+06	2.24115e+06	1.73619e+06	613143	1.17722e+06	1.25376e+06	872061	778625	1.06163e+06	1.17364e+06	1.19083e+06	2.00153e+06	1.37194e+06	1.54315e+06	1.37209e+06	815490	1.80948e+06	1.10885e+06	1.44024e+06	665419	1.3675e+06	50837.2	1.33748e+06	1.22254e+06	1.23849e+06	1.31899e+06	1.41314e+06	1.31628e+06	50300.2	466206	1.24367e+06	1.11579e+06	898477	914545	624280
2-amino-5-oxohexanoicacid@1.043-rp	2.94944e+06	5.43005e+06	3.91377e+06	6.69732e+06	6.60174e+06	5.15638e+06	5.35052e+06	4.5081e+06	4.25806e+06	5.73638e+06	4.28884e+06	5.97284e+06	3.77475e+06	6.61813e+06	4.91491e+06	6.07638e+06	5.95583e+06	6.03665e+06	7.80243e+06	5.34704e+06	5.568e+06	7.07015e+06	3.43457e+06	6.93279e+06	314479	5.71868e+06	5.37775e+06	4.90295e+06	5.08107e+06	5.36289e+06	5.52403e+06	585250	6.24681e+06	6.72354e+06	4.21283e+06	6.17356e+06	5.28441e+06	4.42698e+06
2-amino-5-oxohexanoicacid@2.332-rp	1.16539e+07	1.66179e+07	1.09852e+07	2.66635e+07	9.42873e+06	8.14562e+06	1.40907e+07	3.21206e+07	1.75321e+07	2.07123e+07	7.25121e+06	1.22375e+07	1.10179e+07	1.49209e+07	2.37274e+07	1.0122e+07	1.51212e+07	2.90797e+07	3.33894e+07	2.27885e+07	3.681e+07	2.06191e+07	1.33056e+07	1.87201e+07	112722	1.90815e+07	1.80471e+07	1.69311e+07	1.84416e+07	1.76737e+07	1.76158e+07	138814	2.3317e+07	3.66947e+07	8.88342e+06	1.42103e+07	7.09849e+06	2.35343e+07
2-amino-5-oxohexanoicacid@1.676-rp	1.87238e+06	3.15224e+06	1.27863e+06	3.63031e+06	2.63763e+06	2.02475e+06	3.71937e+06	4.057e+06	2.26239e+06	2.88663e+06	3.58875e+06	4.06856e+06	1.89135e+06	3.09844e+06	2.87732e+06	2.45685e+06	4.44696e+06	5.35807e+06	5.79634e+06	4.44566e+06	5.78725e+06	3.51616e+06	2.12365e+06	3.45434e+06	15765.8	3.5052e+06	3.42451e+06	3.25317e+06	3.45435e+06	3.49582e+06	3.15295e+06	22555.8	4.75032e+06	4.44696e+06	2.08767e+06	2.86215e+06	1.94082e+06	3.31332e+06
4-guanidinobutanoicacid@1.19-rp	1.42226e+07	1.88215e+07	1.90132e+07	2.7394e+07	2.37538e+07	1.22658e+07	3.55905e+07	2.51125e+07	2.07885e+07	2.83605e+07	2.15289e+07	3.47425e+07	2.34234e+07	3.24867e+07	3.08804e+07	6.37435e+07	4.86614e+07	5.49499e+07	5.1233e+07	3.81415e+07	70151608	7.20266e+07	1.72742e+07	3.81479e+07	69870.5	3.26592e+07	3.16362e+07	3.09361e+07	3.07767e+07	3.09277e+07	3.05505e+07	88974.2	2.24246e+07	2.35585e+07	1.64777e+07	1.85108e+07	1.62613e+07	2.86271e+07
3-amino-4-methylhexanoicacid@1.066-rp	1.39827e+07	1.9915e+07	1.8884e+07	1.84778e+07	1.90288e+07	1.48665e+07	3.29475e+07	1.90734e+07	1.50175e+07	2.10927e+07	1.85896e+07	2.48144e+07	1.5092e+07	2.27931e+07	1.45537e+07	1.86955e+07	2.46425e+07	2.63528e+07	3.21531e+07	2.79981e+07	2.73798e+07	2.38366e+07	1.98299e+07	3.35554e+07	43934.4	2.11566e+07	1.91618e+07	2.06841e+07	2.11973e+07	2.1317e+07	2.00725e+07	41108	28733925	2.78693e+07	1.62423e+07	2.12279e+07	1.81721e+07	2.18234e+07
1,4-dichlorobenzene@11.074-rp	331753	2.0763e+06	4.57553e+06	6.02084e+06	1.06021e+06	1.46358e+06	357417	1.61687e+06	2.14807e+06	2.13941e+06	562706	1.34914e+06	1.30934e+06	5.51168e+06	3.00177e+06	1.14914e+06	3.38596e+06	2.43025e+06	921251	3.28392e+06	7.01125e+06	3.62179e+06	580922	1.83606e+06	187685	2.55417e+06	2.569e+06	2.53945e+06	2.30702e+06	2.51327e+06	2.87653e+06	421415	1.82829e+06	3.82332e+06	358056	7.53108e+06	1.8479e+06	1.50968e+06
2-oxoglutaricacid@1.264-rp	3.2628e+07	1.03853e+07	1.38402e+07	1.19152e+07	7.54597e+06	6.02793e+06	1.606e+07	1.31056e+07	1.29635e+07	1.29937e+07	5.92836e+07	6.73338e+06	8.26235e+06	3.92212e+07	8.28939e+06	1.33365e+07	7.54541e+06	3.58095e+07	2.70677e+07	8.73976e+06	4.08624e+07	1.02916e+07	6.43754e+06	1.33579e+07	522035	1.94727e+07	1.68985e+07	1.2111e+07	9.52934e+06	1.08362e+07	1.20162e+07	551753	3.61391e+07	4.14719e+07	8.15483e+06	2.27093e+07	1.29769e+07	1.33854e+07
146.02245@1.098-rp	1.28616e+06	1.14813e+06	1.22048e+06	567296	1.6127e+06	1.61254e+06	2.37438e+06	581970	1.27193e+06	423193	669707	1.55371e+06	1.0509e+06	1.79402e+06	1.01152e+06	2.14813e+06	3.07176e+06	1.46412e+06	1.67112e+06	772260	1.3291e+06	1.63931e+06	2.03632e+06	1.05883e+06	14185.3	1.33222e+06	1.59358e+06	1.22743e+06	1.39173e+06	1.06376e+06	1.23708e+06	14082.6	1.90204e+06	1.39376e+06	1.30101e+06	2.54599e+06	990923	1.56658e+06
Chromone@7.544-rp	116161	89398.5	30111.8	64879.6	28677.3	109082	912169	689850	639071	664053	1.35208e+06	1.35293e+06	316463	624109	359236	317736	482344	336500	1.06087e+06	922346	1.02979e+06	644384	772646	841486	18074	604859	466620	455284	402160	463904	416781	94549.4	85250.7	78442.5	403654	126511	63451.5	127218
2,2-dimethylsuccinicacid@5.676-rp	26239.9	444832	348400	1.21477e+06	242124	100484	67739.3	696723	1.32913e+06	584812	84570.4	534463	126981	1.1905e+06	3.49747e+06	26698.2	151428	436569	456867	184342	471131	452749	480355	416942	201822	502179	409784	370353	437001	474728	395621	355160	427702	706679	376895	268784	147147	383251
2,2-dimethylsuccinicacid@1.952-rp	191546	391190	269670	5.0596e+06	958694	1.4002e+06	319247	2.91621e+06	4.32164e+06	3.55974e+06	770688	513184	931365	2.13893e+06	5.09014e+06	304898	1.45929e+06	355375	1.26219e+06	892929	1.02232e+06	1.49847e+06	973203	1.21391e+06	84098.2	2.17722e+06	1.5472e+06	1.61242e+06	1.54328e+06	1.67474e+06	1.47652e+06	176410	2.82259e+06	2.57991e+06	898953	1.65899e+06	1.16637e+06	199464
2,2-dimethylsuccinicacid@3.883-rp	2.13511e+06	1.81415e+06	1.6533e+06	2.365e+06	2.24628e+06	1.44443e+06	2.46399e+06	1.69633e+06	2.12448e+06	3.13294e+06	2.01796e+06	2.00072e+06	1.65164e+06	2.11407e+06	1.8926e+06	2.38625e+06	1.90853e+06	2.12714e+06	3.92116e+06	2.58495e+06	2.84523e+06	2.78412e+06	1.75578e+06	2.75803e+06	767910	2.61202e+06	2.69056e+06	2.72205e+06	2.78976e+06	2.95969e+06	2.7453e+06	662599	3.60341e+06	3.44256e+06	2.21323e+06	2.48291e+06	2.48041e+06	2.01546e+06
2,2-dimethylsuccinicacid@2.812-rp	96597.7	119373	435070	168673	186205	342371	499579	200550	222599	358876	171672	354773	301612	179178	281769	811038	247146	146025	329342	325691	300399	289404	219126	292024	87742.7	325960	277915	258956	302548	300109	281838	22449.8	416300	216858	589053	408654	401767	316889
Alanylglycine@0.997-rp	1036490933	9.99084e+08	1171101009	1734909358	1750176237	1017867142	1342782348	1343906864	1370193725	1458734732	1148768224	1732206502	1453565727	2191157754	1523123561	1704569148	1925434436	1707203007	1640305795	1428216503	1318602948	2277838206	9.67715e+08	1713850955	834278	1618467818	1416624709	1365570780	1575887610	1442906877	1506141883	4.92005e+06	1388543758	1704325817	1215250480	1918565689	1698276548	9.26329e+08
146.09442@8.85-rp	794850	1.2441e+06	1.76581e+06	1.03633e+06	1.50414e+06	1.44028e+06	1.26761e+06	2.45988e+06	800490	1.54477e+06	1.49221e+06	2.46083e+06	1.37042e+06	2.87066e+06	1.18851e+06	2.17317e+06	2.54643e+06	3.69999e+06	1.4849e+06	2.05444e+06	1.33087e+06	3.48247e+06	3.31865e+06	1.33752e+06	206021	1.72397e+06	1.7543e+06	2.04236e+06	2.472e+06	3.00355e+06	2.7758e+06	286632	1.61344e+06	2.03113e+06	2.48956e+06	1.89054e+06	2.27436e+06	1.45328e+06
3,5-diaminohexanoicacid@0.881-rp	9.11324e+07	1.1376e+08	1.06017e+08	147046178	1.32202e+08	9.82677e+07	1.40909e+08	1.35126e+08	1.43399e+08	1.20638e+08	1.43609e+08	1.35882e+08	133328162	1.62394e+08	1.4985e+08	1.70515e+08	1.87779e+08	1.69249e+08	2.00824e+08	1.68575e+08	1.49845e+08	176761160	1.27976e+08	1.46563e+08	1.21921e+06	1.54368e+08	1.6143e+08	1.43291e+08	1.45834e+08	1.51521e+08	1.52267e+08	1.46591e+06	168225473	1.68677e+08	1.26239e+08	158600548	1.59658e+08	1.20724e+08
146.99651@0.985-rp	177778706	1.1776e+08	1.75026e+08	1.1884e+08	8.11298e+07	6.6147e+07	1.15889e+08	2.71669e+08	1.19747e+08	1.07278e+08	1.2898e+08	1.39094e+08	1.99418e+08	2.62467e+08	1.47809e+08	1.78259e+08	1.95064e+08	2.57669e+08	168588540	1.52392e+08	1.82048e+08	1.91218e+08	1.9948e+08	168749264	45672.7	1.75063e+08	1.58906e+08	1.49954e+08	1.79082e+08	1.741e+08	1.76105e+08	181189	1.07406e+08	1.65669e+08	9.64484e+07	1.48701e+08	1.95364e+08	1.50103e+08
Indole-5,6-quinone@1.806-rp	89931.2	85909.4	71545.2	83762.2	260166	220897	1.17952e+06	2.11981e+06	623940	2.3774e+06	1.01182e+06	3.25326e+06	282337	319713	324397	308005	281794	426318	493705	524516	641918	223136	252392	975521	24839.3	529661	888890	632270	655406	661093	611981	190189	1.16486e+06	1.3416e+06	925312	1.25669e+06	1.42999e+06	1.25135e+06
147.0352@1.568-rp	461525	481404	495276	1.72625e+06	684307	486854	711651	576604	995745	1.03899e+06	1.60405e+06	573774	579118	538597	980115	693199	717096	626477	1.17745e+06	468669	752030	588107	437080	1.19001e+06	37580.1	655128	715245	614478	546599	805966	549669	33531.3	485568	584514	605534	510474	521420	579474
2-oxo-4-hydroxy-5-aminovalericacid@1.01-rp	5.13013e+08	6.51671e+08	6.52509e+08	1075024043	1050709237	6.03288e+08	8.03578e+08	7.64505e+08	7.77922e+08	8.15375e+08	6.29829e+08	1086576223	7.82248e+08	1163367922	9.03063e+08	9.48765e+08	1007304295	9.30443e+08	9.54147e+08	8.49277e+08	7.54998e+08	1339116100	550435066	9.60451e+08	2.06231e+06	9.24453e+08	8.26151e+08	8.06748e+08	8.81967e+08	8.5379e+08	8.80047e+08	4.39719e+06	9.83751e+08	1103149743	8.08532e+08	1509429004	8.94719e+08	6.86542e+08
2-oxo-4-hydroxy-5-aminovalericacid@1.274-rp	2.76773e+07	3.4324e+07	2.98677e+07	5.63405e+07	4.31125e+07	3.96045e+07	2.51261e+07	4.01414e+07	4.40346e+07	4.89125e+07	4.07058e+07	4.01556e+07	5.30918e+07	3.94833e+07	5.0864e+07	3.73542e+07	4.47815e+07	4.30599e+07	4.16168e+07	4.36056e+07	1.46651e+07	1.45628e+07	2.66377e+07	4.85387e+07	3.86775e+06	4.80712e+07	4.17094e+07	4.35245e+07	4.35883e+07	4.21794e+07	4.09002e+07	791240	5.43872e+07	4.0865e+07	1.25864e+07	7.15731e+07	4.16153e+07	2.00832e+07
N-hydroxyisoleucine@1.055-rp	3.00015e+06	6.02061e+06	3.99401e+06	7.34649e+06	4.80822e+06	5.26442e+06	7.66836e+06	9.51934e+06	5.24795e+06	7.77818e+06	6.78259e+06	7.59948e+06	4.53657e+06	6.4751e+06	3.18466e+06	4.35898e+06	5.352e+06	6.33231e+06	1.15887e+07	6.00999e+06	1.05309e+07	5.98698e+06	3.82476e+06	8.90624e+06	24567.2	8.08721e+06	5.73749e+06	7.94954e+06	8.24866e+06	5.25188e+06	5.59161e+06	144057	8.34431e+06	7.23152e+06	4.01486e+06	7.06906e+06	8.02047e+06	5.24908e+06
N-hydroxyisoleucine@1.307-rp	4.23972e+06	6.39484e+06	4.10791e+06	7.16406e+06	6.32406e+06	4.96169e+06	6.81928e+06	5.50519e+06	4.74012e+06	5.28494e+06	6.43929e+06	5.89642e+06	5.10548e+06	7.35451e+06	4.03471e+06	4.94763e+06	6.43101e+06	1.03673e+07	7.43849e+06	6.83823e+06	8.46225e+06	7.5243e+06	4.6362e+06	6.93918e+06	107683	6.76619e+06	6.30518e+06	5.98569e+06	6.64324e+06	6.80771e+06	6.92054e+06	106288	6.27955e+06	8.5969e+06	4.06088e+06	6.01495e+06	5.01338e+06	6.16573e+06
2-dehydro-3-deoxyarabinonicacid@1.426-rp	2.44674e+07	2.57836e+07	2.16929e+07	2.93644e+07	2.59313e+07	3.05005e+07	4.15654e+07	4.38445e+07	3.51561e+07	3.10472e+07	3.34174e+07	2.99266e+07	3.17159e+07	4.18469e+07	4.43749e+07	4.25737e+07	3.13603e+07	3.53782e+07	5.56647e+07	5.22645e+07	7.49992e+07	4.06499e+07	2.7686e+07	4.6775e+07	175986	3.91438e+07	4.26674e+07	3.72997e+07	4.20088e+07	3.20693e+07	3.94382e+07	397264	3.91124e+07	3.42379e+07	1.63734e+07	2.37842e+07	1.76224e+07	2.97099e+07
2-dehydro-3-deoxyarabinonicacid@1.04-rp	5.17547e+07	7.72483e+07	7.32535e+07	1.01625e+08	1.13126e+08	7.97272e+07	1.05939e+08	8.04794e+07	1.12216e+08	1.11374e+08	9.0027e+07	1.17411e+08	9.13238e+07	9.24441e+07	1.23487e+08	1.09052e+08	1.21084e+08	1.06409e+08	1.14379e+08	1.06255e+08	9.77898e+07	1.35077e+08	7.74477e+07	1.20624e+08	595255	9.01717e+07	1.06714e+08	1.02207e+08	1.07027e+08	1.12028e+08	1.20581e+08	1.047e+06	1.0181e+08	1.00886e+08	8.97474e+07	1.13139e+08	9.19431e+07	1.02869e+08
3-hydroxy-1-indanone@1.904-rp	2.4034e+08	3.22739e+08	2.4431e+08	4.5003e+08	3.80852e+08	332397471	4.15334e+08	3.88153e+08	3.21465e+08	370698572	4.54661e+08	3.29186e+08	3.63598e+08	5.01784e+08	3.74543e+08	4.95528e+08	377397600	4.33375e+08	5.8757e+08	3.82995e+08	4.9001e+08	4.87188e+08	2.63943e+08	5.26467e+08	841056	447927850	3.78599e+08	4.04192e+08	3.83398e+08	4.23918e+08	4.36366e+08	1.02313e+06	5.53589e+08	4.39623e+08	3.85434e+08	4.6516e+08	3.89063e+08	3.11084e+08
148.58995@0.845-rp	1.04249e+06	1.88383e+06	1.5561e+06	2.78257e+06	2.33905e+06	1.53179e+06	2.58198e+06	2.57536e+06	1.63044e+06	2.16476e+06	2.21795e+06	2.02002e+06	1.63854e+06	3.03967e+06	1.76046e+06	2.40656e+06	2.01862e+06	2.0024e+06	2.32749e+06	2.29104e+06	2.02744e+06	2.43323e+06	1.61583e+06	2.03828e+06	378323	2.58362e+06	2.47303e+06	2.51116e+06	2.21306e+06	2.23588e+06	2.36165e+06	414196	2.32943e+06	2.26312e+06	484127	2.33899e+06	2.06584e+06	1.56143e+06
149.00643@0.977-rp	1.07032e+07	1.28368e+07	6.22748e+06	5.02466e+06	4.02119e+06	1.32067e+07	3.82432e+06	1.04495e+07	3.9412e+06	5.84817e+06	8.66961e+06	3.72122e+06	6.86596e+06	6.25085e+06	3.18151e+06	3.44948e+06	4.70537e+06	4.81974e+06	2.36965e+06	2.49429e+06	2.94232e+06	2.93646e+06	9.07197e+06	3.02498e+06	25458.2	5.4028e+06	5.65074e+06	4.84412e+06	5.62031e+06	5.09905e+06	5.75354e+06	27355.7	1.97674e+06	3.56591e+06	4.93048e+06	3.65948e+06	8.80887e+06	3.85724e+06
Methionine@1.207-rp	4.32279e+06	4.14181e+06	3.89439e+06	5.55952e+06	5.13666e+06	4.99678e+06	2.46958e+06	5.44873e+06	6.53916e+06	5.74155e+06	6.0403e+06	4.53708e+06	5.74379e+06	4.98415e+06	8.4657e+06	5.31308e+06	5.93919e+06	6.16412e+06	7.06816e+06	6.87843e+06	6.56089e+06	6.06345e+06	4.77247e+06	5.75956e+06	25732.8	5.97133e+06	5.7153e+06	5.65479e+06	4.88337e+06	5.99326e+06	5.71356e+06	28965.3	8.52417e+06	5.24887e+06	7.01936e+06	7.53244e+06	6.34193e+06	3.10719e+06
N,N-dihydroxyvaline@1.013-rp	3.64176e+06	7.29854e+06	5.27136e+06	8.29507e+06	8.52062e+06	4.43932e+06	9.90778e+06	5.91671e+06	6.09051e+06	6.92457e+06	6.42986e+06	7.25236e+06	4.37943e+06	6.89528e+06	7.90242e+06	8.77373e+06	1.04437e+07	1.34767e+07	1.86351e+07	1.30634e+07	1.06588e+07	1.15825e+07	3.50578e+06	7.87661e+06	127391	9.60093e+06	7.51301e+06	6.86219e+06	8.35843e+06	7.6591e+06	7.87801e+06	114015	1.06509e+07	1.10508e+07	4.71005e+06	7.81654e+06	5.95225e+06	8.7939e+06
Arabinose@1.073-rp	1.05679e+07	1.89487e+07	1.27839e+07	4.16655e+07	3.11862e+07	1.91798e+07	1.82984e+07	2.45874e+07	2.87623e+07	3.83857e+07	3.45687e+07	2.75403e+07	3.65005e+07	2.00715e+07	3.4056e+07	4.85842e+07	1.82195e+07	1.91353e+07	2.51085e+07	5.13865e+07	2.67295e+07	3.07373e+07	7.77262e+06	2.58832e+07	123728	2.52617e+07	2.89305e+07	2.67556e+07	2.8467e+07	2.75049e+07	2.64502e+07	271301	2.57263e+07	2.65926e+07	5.38382e+07	3.00401e+07	3.83323e+07	1.13623e+07
3-methoxyacetophenone@10.518-rp	81813.7	155953	38116	164880	141154	17570.8	114862	137001	150807	201654	158600	18649.9	101145	150780	165285	153259	190507	188559	19871.6	157873	168559	169638	19830.6	22355.3	48046	250647	222292	190365	208609	195136	195608	27782.1	1.27433e+06	796247	434643	513878	1.28661e+06	677639
150.0777@1.022-rp	430338	752633	520905	1.19263e+06	1.02697e+06	433653	1.32897e+06	530788	811598	995570	641564	974296	789422	1.42583e+06	984190	1.07497e+06	878450	933903	1.34801e+06	951687	967934	1.1933e+06	492678	1.08282e+06	23492.7	795859	901064	869353	764176	748326	1.01869e+06	23120.5	1.19956e+06	1.40432e+06	860125	1.37616e+06	845220	1.02882e+06
150.07914@1.017-rp	345290	477283	417264	496713	668522	438037	480340	330711	360097	546920	276099	589179	451270	537842	636983	614388	689659	691698	556793	360249	907566	370693	266783	776086	16472.3	510670	609927	445884	463243	419996	383446	16211.3	488834	774947	334343	656266	582808	808443
151.00171@1.765-rp	9.51727e+07	106765916	1.26384e+08	9.286e+07	1.2167e+08	1.08968e+08	2.76464e+08	6.37951e+07	4.09682e+07	9.66492e+07	1.04502e+08	6.78649e+07	6.89529e+07	2.73492e+08	6.81356e+07	2.17528e+08	1.25283e+08	1.84566e+08	1.44629e+08	6.86329e+07	1.10002e+08	209967752	1.2179e+08	1.32447e+08	1.21301e+06	1.33997e+08	124529076	1.25947e+08	125079875	1.22221e+08	1.24166e+08	1.29499e+06	7.93496e+07	114985740	6.68091e+07	8.44792e+07	1.4517e+08	1.01334e+08
Guanine@1.95-rp	7.52165e+06	9.589e+06	6.02973e+06	1.72726e+07	1.45826e+07	1.54847e+07	6.39341e+06	8.87827e+06	1.23243e+07	1.22687e+07	1.62841e+07	8.53658e+06	1.11583e+07	9.23987e+06	1.03509e+07	1.01764e+07	9.65129e+06	8.8629e+06	1.28103e+07	1.54053e+07	1.31939e+07	9.98531e+06	4.79935e+06	1.43466e+07	42566.2	1.25107e+07	1.19955e+07	1.05912e+07	1.06649e+07	1.15641e+07	1.12053e+07	156357	1.68364e+07	1.20579e+07	1.60414e+07	1.58288e+07	1.03668e+07	5.96095e+06
Guanine@1.488-rp	2.74038e+07	3.20626e+07	3.74828e+07	4.19118e+07	3.40307e+07	2.85167e+07	4.03378e+07	3.40521e+07	3.09716e+07	3.36667e+07	2.82693e+07	3.42661e+07	3.40662e+07	3.32157e+07	4.26766e+07	3.63387e+07	4.07597e+07	3.83865e+07	3.49714e+07	3.20263e+07	4.14043e+07	3.45878e+07	3.34954e+07	4.22827e+07	62293.2	3.77963e+07	3.33594e+07	3.39814e+07	3.6947e+07	3.58593e+07	3.28534e+07	119714	3.00341e+07	3.39783e+07	2.87816e+07	3.46498e+07	2.91214e+07	3.18452e+07
Guanine@2.562-rp	4.42583e+07	4.25031e+07	3.87815e+07	9.53105e+07	8.37361e+07	1.12276e+08	3.43065e+07	6.4111e+07	5.83451e+07	8.49208e+07	7.42205e+07	5.3358e+07	6.7668e+07	6.1188e+07	8.53569e+07	6.68787e+07	6.06629e+07	5.14239e+07	5.54367e+07	8.11821e+07	6.34308e+06	7.01746e+07	4.54658e+07	8.33002e+07	112933	7.12745e+07	6.84588e+07	6.54801e+07	7.21355e+07	7.91793e+07	6.5966e+07	52099.5	1.09467e+08	6.4969e+07	1.12569e+08	9.07486e+07	7.72251e+07	2.69318e+07
2-amino-3-methylbenzoicacid@1.463-rp	1.10984e+06	2.20639e+06	1.29011e+06	2.46426e+06	2.07098e+06	1.93244e+06	1.29734e+06	1.93672e+06	1.76459e+06	1.76224e+06	2.26822e+06	1.20148e+06	2.00207e+06	1.45463e+06	2.45239e+06	1.81172e+06	1.95109e+06	2.20162e+06	2.51811e+06	2.47256e+06	2.28095e+06	1.49843e+06	1.47245e+06	2.45092e+06	24745.4	2.15441e+06	2.0101e+06	1.95158e+06	1.83188e+06	2.06797e+06	1.88472e+06	32922.9	2.61436e+06	2.04619e+06	2.23691e+06	2.09489e+06	1.46212e+06	1.20371e+06
Alloxanthine@2.084-rp	1.00976e+07	1.04859e+07	9.8597e+06	1.52776e+07	1.41227e+07	1.63057e+07	1.33598e+07	1.02807e+07	1.00002e+07	1.6305e+07	1.45768e+07	8.57533e+06	9.70826e+06	2.05224e+07	1.15313e+07	1.55862e+07	1.23659e+07	1.87123e+07	1.70856e+07	1.08713e+07	1.31847e+07	1.89245e+07	8.75643e+06	1.57926e+07	58745.7	1.45537e+07	1.27529e+07	1.31587e+07	1.297e+07	1.34185e+07	1.2658e+07	43758.8	1.56158e+07	1.1714e+07	1.17185e+07	1.14338e+07	1.22825e+07	5.35192e+06
Alloxanthine@2.394-rp	7.86678e+08	714071209	6.50152e+08	1224512812	993436916	1075416221	7.65936e+08	8.19302e+08	1050498608	1171835869	1164217841	7.99353e+08	1047047979	1081590922	9.93622e+08	8.92081e+08	9.51323e+08	1235665437	1129018874	1037410547	1012914948	1052131463	6.42934e+08	1146189141	197413	1000963917	1013289719	9.51463e+08	9.98196e+08	980675281	9.49053e+08	768766	1269343849	1054401640	1139810257	1223827551	9.31766e+08	4.2297e+08
Alloxanthine@3.248-rp	2.16154e+06	2.28024e+06	2.40485e+06	3.76286e+06	2.79463e+06	3.73587e+06	3.8586e+06	1.47369e+06	2.71615e+06	3.10926e+06	2.13059e+06	1.42485e+06	1.548e+06	6.10245e+06	3.82585e+06	3.79519e+06	2.67267e+06	4.87771e+06	3.17369e+06	1.94228e+06	2.45531e+06	4.32275e+06	1.81261e+06	3.45004e+06	19079.4	2.38185e+06	2.76701e+06	2.7794e+06	2.99501e+06	2.82259e+06	2.87632e+06	18562	2.3511e+06	2.1723e+06	2.05246e+06	882430	2.43475e+06	567447
2-amino-4-nitrotoluene@4.403-rp	3.3784e+06	4.13698e+06	4.4698e+06	7.00834e+06	4.12041e+06	3.19995e+06	6.47313e+06	7.28957e+06	5.02848e+06	6.87632e+06	5.52325e+06	6.29004e+06	5.24154e+06	9.11737e+06	5.25676e+06	7.05328e+06	5.81e+06	6.02157e+06	8.45192e+06	6.23428e+06	5.97296e+06	1.10147e+07	4.73008e+06	1.01636e+07	43843.7	6.20717e+06	5.93923e+06	6.41836e+06	6.72136e+06	5.75448e+06	6.20093e+06	53789.9	4.25859e+06	5.7139e+06	4.40779e+06	4.66069e+06	6.53858e+06	3.72801e+06
2-amino-4-nitrotoluene@3.554-rp	9.5017e+06	1.18988e+07	1.09981e+07	1.7593e+07	1.18298e+07	9.11293e+06	1.63639e+07	1.80713e+07	1.27729e+07	1.71332e+07	1.32172e+07	1.58867e+07	1.35783e+07	2.07549e+07	1.46944e+07	1.64953e+07	1.45434e+07	1.56756e+07	1.92258e+07	1.50893e+07	1.40376e+07	2.87275e+07	1.30857e+07	2.50649e+07	47801.3	1.60954e+07	1.48484e+07	1.42354e+07	1.51197e+07	1.51493e+07	1.67172e+07	107818	1.12421e+07	1.51461e+07	1.21004e+07	1.20449e+07	1.51341e+07	9.66993e+06
152.55998@6.378-rp	229151	445738	267782	271298	359373	274825	545254	697886	419939	502030	804763	358443	425778	502078	397019	333578	518586	521146	381832	397537	463708	469148	239977	316500	22528.8	459751	504383	473991	452215	528269	476417	23319	274404	361660	33903	333367	332499	365831
153.01732@3.248-rp	1.51699e+06	1.65648e+06	1.4383e+06	2.06907e+06	2.31197e+06	2.6327e+06	2.7407e+06	1.1577e+06	1.58967e+06	2.00389e+06	1.33158e+06	895670	820339	3.62935e+06	2.40298e+06	2.26965e+06	1.75664e+06	2.82024e+06	1.87394e+06	1.12984e+06	1.56941e+06	2.80068e+06	1.39917e+06	2.04642e+06	25602.7	2.05253e+06	1.83696e+06	1.80668e+06	1.71542e+06	1.75645e+06	1.88383e+06	24666.9	1.16071e+06	1.50613e+06	1.07147e+06	802996	1.62487e+06	482790
153.01733@2.391-rp	2.195e+07	1.71369e+07	1.7525e+07	2.54509e+07	2.33228e+07	2.43288e+07	1.76933e+07	2.05471e+07	2.10489e+07	2.16957e+07	2.68209e+07	1.68602e+07	2.38636e+07	2.76506e+07	2.18573e+07	2.1496e+07	2.18103e+07	2.99298e+07	2.76314e+07	2.44108e+07	2.2665e+07	2.42252e+07	1.69491e+07	2.69108e+07	883959	2.92601e+07	2.36388e+07	2.38976e+07	2.3151e+07	2.35143e+07	2.42464e+07	1.03208e+06	3.1441e+07	2.58575e+07	2.74108e+07	2.81024e+07	2.29522e+07	1.11219e+07
153.01826@2.414-rp	6.3528e+06	2.74624e+06	2.74701e+06	2.79865e+06	4.30175e+06	3.78564e+06	4.09343e+06	3.43886e+06	3.0594e+06	3.51798e+06	3.55827e+06	3.66335e+06	5.11106e+06	3.32306e+06	3.42047e+06	3.02105e+06	2.95653e+06	3.13386e+06	5.07553e+06	3.55857e+06	3.10792e+06	3.30762e+06	2.97072e+06	3.70872e+06	27542.7	6.11325e+06	3.65084e+06	3.43635e+06	3.85585e+06	3.87254e+06	3.25908e+06	33486.9	6.58521e+06	3.77941e+06	2.3304e+06	3.67888e+06	2.48236e+06	1.91503e+06
3-hydroxy-2-methylpyridine-5-carboxylicacid@4.397-rp	2.86996e+06	3.54983e+06	3.5944e+06	5.31161e+06	3.77021e+06	2.68169e+06	5.13802e+06	5.75485e+06	4.21608e+06	5.81926e+06	3.8607e+06	5.08876e+06	4.72634e+06	6.67859e+06	4.78033e+06	5.99155e+06	4.61383e+06	4.99741e+06	6.38974e+06	4.764e+06	4.8229e+06	9.77536e+06	3.64809e+06	8.14457e+06	164596	4.98105e+06	4.88946e+06	5.14321e+06	5.04893e+06	5.3204e+06	4.49297e+06	121642	3.53104e+06	4.62467e+06	3.72255e+06	3.66267e+06	4.95259e+06	2.52522e+06
3-hydroxy-2-methylpyridine-5-carboxylicacid@1.712-rp	3.6424e+06	2.49662e+06	2.64303e+06	4.53609e+06	3.66917e+06	4.91951e+06	2.37966e+06	2.97113e+06	3.88159e+06	4.09673e+06	3.16865e+06	2.83477e+06	3.20325e+06	3.19068e+06	3.7629e+06	3.79366e+06	3.49517e+06	3.6347e+06	3.29017e+06	4.3266e+06	3.50953e+06	2.80732e+06	1.87938e+06	4.16261e+06	196572	3.15232e+06	2.9223e+06	3.502e+06	3.23351e+06	3.629e+06	3.45579e+06	170945	3.84356e+06	2.25246e+06	3.66711e+06	3.39619e+06	2.77581e+06	1.46753e+06
153.05567@1.105-rp	1.24519e+06	1.54451e+06	695696	1.43986e+06	996897	633205	2.43798e+06	2.34212e+06	1.10698e+06	1.43014e+06	2.81262e+06	1.60801e+06	1.12493e+06	756215	543653	502927	440482	1.12073e+06	1.32493e+06	1.02143e+06	828827	1.29926e+06	470084	450072	13579.4	1.2767e+06	822801	1.13404e+06	907301	1.30057e+06	1.13442e+06	12854.9	280304	869928	535249	1.06941e+06	1.23543e+06	1.53643e+06
FAPy-adenine@2.151-rp	3.60301e+07	5.0448e+07	3.85165e+07	7.8239e+07	6.77454e+07	5.92476e+07	4.61362e+07	5.806e+07	4.42348e+07	6.39025e+07	6.10888e+07	6.08268e+07	6.48803e+07	6.78803e+07	5.23094e+07	7.33944e+07	6.67575e+07	5.92869e+07	6.73306e+07	6.25034e+07	6.51793e+07	5.35015e+07	3.64642e+07	7.84184e+07	170371	6.62313e+07	5.54051e+07	6.59304e+07	6.7877e+07	5.88914e+07	6.45727e+07	295896	8.21729e+07	6.45022e+07	7.85537e+07	6.73658e+07	7.18811e+07	4.40691e+07
Propionylphosphate@1.068-rp	1.3053e+07	1.35192e+07	1.00138e+07	1.74398e+07	2.28707e+07	1.6075e+07	1.7676e+07	1.27814e+07	1.68177e+07	1.7995e+07	1.52839e+07	1.94859e+07	1.32806e+07	1.73771e+07	1.73333e+07	1.68478e+07	1.7077e+07	1.07784e+07	1.57021e+07	1.97202e+07	1.46097e+07	1.87736e+07	1.22664e+07	1.75162e+07	93366.6	1.43445e+07	1.69868e+07	17801810	1.5018e+07	1.41129e+07	1.4775e+07	100806	1.98777e+07	1.58379e+07	2.01702e+07	1.73525e+07	1.51077e+07	1.10388e+07
154.02433@2.199-rp	457427	881110	339951	917195	581257	449560	431257	675258	426261	396675	501175	631679	609500	560360	562479	534583	830446	1.31224e+06	1.87152e+06	1.61573e+06	1.81466e+06	967353	1.05119e+06	1.27301e+06	29623.3	970771	878384	793115	949985	951986	881325	29540.1	1.2975e+06	1.75164e+06	271045	772859	270352	1.49135e+06
154.07175@0.907-rp	8.70336e+06	1.90091e+07	7.16177e+06	1.04304e+07	7.95043e+06	1.05882e+07	8.78066e+06	1.45834e+07	9.58986e+06	8.44685e+06	1.69186e+07	1.38983e+07	9.39809e+06	9.79372e+06	7.83685e+06	8.75037e+06	1.21431e+07	1.2699e+07	8.55197e+06	1.15736e+07	8.76214e+06	1.14156e+07	9.76064e+06	8.25745e+06	541562	1.02365e+07	1.00595e+07	9.45621e+06	1.02013e+07	1.20922e+07	1.01282e+07	268055	1.28501e+07	9.17566e+06	9.1038e+06	9.77588e+06	9.80639e+06	1.11032e+07
154.07404@2.637-rp	250448	759231	226905	687059	406105	305082	1.0691e+06	995564	475583	718932	532435	702109	461594	411916	529442	389566	580134	981157	832016	794273	769554	509953	147169	514592	23717.6	575137	495317	454776	563523	519244	545919	22556.5	421714	481361	288009	307923	373081	528995
154.09943@9.853-rp	432031	859618	645744	803562	2.12783e+06	826720	653767	487604	675131	895351	823470	669731	702917	447341	926382	378697	1.02461e+06	643153	810594	682267	552208	716317	512145	819983	62171.4	599304	550636	536719	640064	611926	697783	284774	496911	634911	321083	686695	1.51359e+06	522358
155.01938@0.986-rp	1.62602e+06	4.20654e+06	1.70435e+06	1.5651e+06	1.4321e+06	2.14751e+06	1.25625e+06	1.59032e+06	1.12462e+06	1.35101e+06	2.06348e+06	1.11308e+06	2.05409e+06	2.06953e+06	1.16482e+06	1.6145e+06	1.31663e+06	1.57547e+06	1.28086e+06	1.38685e+06	1.05959e+06	1.18231e+06	1.84567e+06	854580	27986.8	1.95995e+06	1.59176e+06	1.50868e+06	1.87639e+06	1.67936e+06	1.94398e+06	28184.1	1.45575e+06	2.24039e+06	2.04124e+06	3.46052e+06	2.51155e+06	1.46071e+06
Histidine@0.893-rp	8.31903e+07	5.29337e+07	8.00989e+07	1.18947e+08	1.05878e+08	5.4133e+07	1.27804e+08	8.57239e+07	1.09436e+08	1.1982e+08	1.42209e+08	1.1755e+08	8.17755e+07	1.46851e+08	9.82294e+07	1.25508e+08	1.1427e+08	1.30457e+08	1.67852e+08	1.20512e+08	1.20633e+08	1.55175e+08	6.37472e+07	1.11837e+08	1.95121e+06	1.08278e+08	1.22892e+08	1.06155e+08	1.30732e+08	1.07251e+08	1.0395e+08	2.39495e+06	121416423	120442021	9.92666e+07	1.53528e+08	1.12669e+08	8.95882e+07
Histidine@0.97-rp	1.46975e+08	1.02621e+08	1.15214e+08	1.78102e+08	1.66555e+08	9.21374e+07	1.73529e+08	1.66582e+08	1.80706e+08	2.2013e+08	2.65642e+08	2.43967e+08	1.39038e+08	207336672	1.63017e+08	1.70935e+08	1.95903e+08	1.85445e+08	3.23197e+08	1.80777e+08	1.84448e+08	307325432	1.12652e+08	167995826	1.95374e+06	1.81881e+08	1.75171e+08	1.56014e+08	2.5329e+08	1.57787e+08	1.58263e+08	2.40859e+06	172006332	2.16018e+08	1.53052e+08	2.84565e+08	1.58646e+08	1.37577e+08
155.93568@0.962-rp	1.70211e+07	3.04046e+07	9.24551e+06	7.54896e+06	5.2979e+06	2.17471e+07	7.25004e+06	1.08404e+07	4.2352e+06	7.36283e+06	1.45041e+07	3.96303e+06	8.30334e+06	6.71527e+06	3.01532e+06	4.35953e+06	3.63616e+06	6.79871e+06	3.81705e+06	3.15116e+06	4.86465e+06	3.78421e+06	1.12191e+07	5.42906e+06	90957.4	5.39537e+06	6.00007e+06	7.27965e+06	8.39014e+06	7.50428e+06	6.48348e+06	80080.4	3.50731e+06	6.66327e+06	5.75301e+06	4.06766e+06	7.68095e+06	7.39649e+06
155.95647@0.959-rp	3.91327e+06	9.6304e+06	2.39011e+06	8.83156e+06	3.97555e+06	5.40426e+06	2.23324e+06	1.24672e+07	3.358e+06	7.13477e+06	8.97619e+06	2.43715e+06	9.05559e+06	3.07616e+06	3.32029e+06	4.03803e+06	2.26339e+06	3.29173e+06	1.46834e+06	5.40449e+06	2.29798e+06	1.63524e+06	1.56557e+06	2.65283e+06	53336.2	4.71394e+06	5.10871e+06	4.13443e+06	4.95833e+06	4.96658e+06	4.97906e+06	56082.6	1.25965e+06	3.32909e+06	7.33583e+06	4.14212e+06	7.91439e+06	2.55184e+06
2,3-dihydro-2,3-dihydroxybenzoicacid@1.058-rp	3.92921e+06	5.05486e+06	4.39296e+06	6.46648e+06	5.74135e+06	5.96103e+06	5.48197e+06	3.49403e+06	4.61886e+06	5.46001e+06	4.16172e+06	4.45348e+06	4.24213e+06	6.36691e+06	5.01842e+06	6.21551e+06	6.33922e+06	5.65383e+06	6.07982e+06	5.5852e+06	4.6838e+06	5.63758e+06	4.06521e+06	6.18963e+06	124546	5.02082e+06	5.71653e+06	5.18116e+06	5.03081e+06	6.46985e+06	5.67276e+06	728702	4.91994e+06	5.1452e+06	4.27134e+06	5.18107e+06	5.30106e+06	4.86989e+06
4-imidazolone-5-propanoicacid@1.042-rp	1.3415e+07	1.61975e+07	1.35466e+07	2.92301e+07	1.98307e+07	1.37515e+07	2.35393e+07	1.74513e+07	2.19074e+07	1.77404e+07	1.50144e+07	1.69733e+07	1.59121e+07	2.94564e+07	2.31696e+07	2.04236e+07	2.11147e+07	2.37252e+07	2.51504e+07	2.23503e+07	2.55017e+07	2.65097e+07	1.06327e+07	2.6303e+07	195399	2.04069e+07	2.20355e+07	2.15267e+07	1.82593e+07	1.88611e+07	2.11903e+07	56686.6	1.84906e+07	2.35625e+07	1.51836e+07	2.00374e+07	1.50266e+07	1.43541e+07
157.04868@1.038-rp	414185	566117	1.35233e+06	2.50913e+06	803948	475846	1.22626e+06	1.07207e+06	1.18023e+06	1.61974e+06	1.32341e+06	967242	473419	1.17188e+06	1.10573e+06	1.88274e+06	800675	1.11256e+06	943713	2.1391e+06	1.4785e+06	2.26626e+06	809917	1.13278e+06	76762.9	1.17407e+06	840236	908123	1.12007e+06	1.27274e+06	1.36141e+06	67937.8	954387	1.41186e+06	573148	1.33358e+06	864215	901151
3-methylcrotonylglycine@4.092-rp	399911	755221	849320	1.20001e+06	769711	711035	1.18636e+06	442702	709047	668629	615490	524948	625697	920698	889207	749762	722812	789536	742865	412073	521577	814756	434849	754174	27671.9	849854	699692	700836	687851	675553	727324	44622.8	1.03496e+06	885193	749149	711080	641392	340918
157.91478@0.948-rp	7.33115e+07	9.58019e+07	6.07401e+07	9.34388e+07	7.5545e+07	9.81035e+07	9.8309e+07	8.90497e+07	4.53156e+07	8.41205e+07	9.65743e+07	6.10072e+07	6.92821e+07	9.58077e+07	4.93585e+07	7.12209e+07	6.03052e+07	8.63015e+07	6.60651e+07	5.66608e+07	7.05022e+07	6.9757e+07	6.3636e+07	7.9305e+07	133738	8.43349e+07	8.66472e+07	7.74478e+07	7.61769e+07	7.5022e+07	8.79923e+07	127832	6.92777e+07	9.62103e+07	7.27134e+07	6.92298e+07	7.37161e+07	7.48444e+07
157.99822@0.917-rp	7.46439e+07	7.68825e+07	9.00735e+07	150025480	2.10805e+08	8.75871e+07	1.85154e+08	8.44754e+07	160784875	1.5158e+08	1.0803e+08	1.76592e+08	1.03721e+08	1.31478e+08	1.45932e+08	1.47813e+08	1.41942e+08	1.31423e+08	1.89336e+08	1.73457e+08	1.46947e+08	1.73014e+08	7.76005e+07	1.6951e+08	566249	1.31341e+08	1.5488e+08	1.38215e+08	1.43409e+08	1.42938e+08	1.28102e+08	1.32419e+06	1.89394e+08	1.75938e+08	1.47633e+08	1.72299e+08	1.13032e+08	1.45783e+08
158.02047@2.316-rp	7.76122e+06	7.98972e+06	7.16435e+06	1.11663e+07	9.53867e+06	1.27204e+07	5.68059e+06	8.45445e+06	7.35982e+06	9.54333e+06	1.02264e+07	7.19902e+06	8.71977e+06	7.40164e+06	8.57841e+06	1.01967e+07	8.90514e+06	8.90556e+06	8.96482e+06	8.51871e+06	9.29074e+06	7.85601e+06	7.37877e+06	9.98177e+06	76464.4	1.16776e+07	8.9623e+06	9.04315e+06	8.36397e+06	9.31579e+06	9.53525e+06	60865	9.45754e+06	9.16975e+06	8.97166e+06	1.0093e+07	8.77046e+06	5.76022e+06
158.04298@0.82-rp	679063	622938	886292	734062	947405	661413	971096	575705	725968	821327	712690	863225	719210	833296	622520	583766	725957	791765	929752	744047	807138	907959	747551	871286	49553.1	880391	741120	748643	891675	910577	739926	50430.9	791353	850376	270709	678870	733502	706377
Allantoin@1.111-rp	2.97851e+07	4.59332e+07	2.67901e+07	4.25206e+07	35018179	3.11626e+07	3.47928e+07	3.68634e+07	4.26353e+07	4.03461e+07	4.17788e+07	4.27277e+07	3.56909e+07	3.94389e+07	4.03566e+07	2.75309e+07	3.49053e+07	4.26753e+07	4.2013e+07	3.7903e+07	3.46775e+07	4.57729e+07	2.62572e+07	3.95026e+07	113484	3.75092e+07	3.68249e+07	3.48323e+07	3.75798e+07	3.59702e+07	3.41404e+07	142854	3.1599e+07	5.37942e+07	3.24597e+07	4.094e+07	2.48998e+07	2.32643e+07
5-hydroxyectoine@1.029-rp	4.79197e+06	1.13013e+07	4.89582e+06	9.29761e+06	1.14908e+07	5.66157e+06	1.88189e+07	1.37815e+07	1.21382e+07	13877491	1.64858e+07	1.42623e+07	6.61617e+06	1.93293e+07	1.6197e+07	9.20044e+06	2.00756e+07	1.22739e+07	1.87628e+07	1.59271e+07	1.48426e+07	2.63463e+07	7.66339e+06	1.04489e+07	596469	1.48109e+07	1.3204e+07	1.20489e+07	1.12858e+07	1.33443e+07	1.09119e+07	622231	1.92008e+07	1.53423e+07	8.09891e+06	1.38345e+07	7.88215e+06	9.6755e+06
5-hydroxyectoine@2.249-rp	581672	1.00796e+06	873466	894829	797708	922052	1.00594e+06	864430	604214	809641	825385	914197	724900	959932	682268	840922	697551	1.00394e+06	929402	630023	740696	590429	687453	1.15335e+06	26346.3	979574	880774	919915	916945	881945	1.07601e+06	21725	1.17875e+06	1.18759e+06	1.11159e+06	1.11876e+06	1.14863e+06	1.06095e+06
159.03814@0.82-rp	1.03402e+07	1.01416e+07	1.13702e+07	9.42209e+06	1.20728e+07	1.0549e+07	1.23002e+07	1.02168e+07	7.87428e+06	1.02556e+07	1.09143e+07	8.42185e+06	9.28104e+06	1.13717e+07	7.23128e+06	9.51622e+06	1.18842e+07	1.11857e+07	1.19686e+07	9.90831e+06	9.9489e+06	1.40084e+07	9.99083e+06	1.14326e+07	409243	1.11142e+07	9.62367e+06	1.01789e+07	1.03586e+07	1.08737e+07	1.08612e+07	380744	8.95636e+06	1.10609e+07	3.88052e+06	1.02993e+07	1.19659e+07	9.63844e+06
6-methoxyquinoline@3.079-rp	965619	1.37733e+06	1.07278e+06	1.66908e+06	1.50815e+06	1.06055e+06	1.28518e+06	1.16056e+06	1.18316e+06	1.40219e+06	1.82523e+06	1.33027e+06	1.21288e+06	1.5914e+06	1.42834e+06	1.49337e+06	1.23063e+06	1.46961e+06	1.61174e+06	1.3531e+06	1.67261e+06	1.80741e+06	1.08248e+06	1.72213e+06	27187.7	1.44654e+06	1.47497e+06	1.34792e+06	1.50199e+06	1.38803e+06	1.58761e+06	26147.4	1.79735e+06	1.83514e+06	1.35986e+06	2.00121e+06	1.52561e+06	1.27962e+06
6-methoxyquinoline@1.885-rp	3.25892e+06	4.87064e+06	3.3884e+06	4.82414e+06	3.37655e+06	2.39823e+06	7.01361e+06	5.26202e+06	3.71047e+06	3.7712e+06	6.18076e+06	3.53664e+06	3.6821e+06	7.38486e+06	2.94054e+06	4.74979e+06	2.90676e+06	4.98194e+06	7.77106e+06	4.49333e+06	5.83661e+06	1.5972e+07	2.3891e+06	4.36101e+06	38693.4	6.10637e+06	4.85267e+06	4.66604e+06	4.67061e+06	4.85404e+06	4.44286e+06	39295.9	2.92758e+06	6.84557e+06	3.00823e+06	4.26239e+06	5.96223e+06	4.23866e+06
3-dehydrocarnitine@1.04-rp	3.64456e+06	2.90116e+06	3.40341e+06	4.88296e+06	5.03336e+06	3.45332e+06	6.26479e+06	3.62209e+06	2.86066e+06	4.82547e+06	4.61183e+06	4.15308e+06	2.85771e+06	4.33928e+06	2.84185e+06	3.46544e+06	4.00271e+06	2.91723e+06	5.10127e+06	3.39581e+06	4.13106e+06	4.29162e+06	2.6533e+06	5.29457e+06	53649.6	4.35229e+06	4.41063e+06	3.59843e+06	4.0039e+06	4.28117e+06	4.10021e+06	67048.1	4.34646e+06	4.87458e+06	2.45645e+06	4.11086e+06	3.17943e+06	4.13225e+06
3-dehydrocarnitine@3.604-rp	269998	617953	443076	829694	388980	303490	577277	544449	466110	533134	279633	420372	278438	551022	721915	382438	445362	688985	837054	484453	631253	581512	275232	530205	24320	499444	593071	508684	506716	514675	483530	30470.5	757740	890969	345155	467000	181772	424614
3-dehydrocarnitine@3.917-rp	560075	1.91527e+06	679552	1.35774e+06	931845	597925	2.38214e+06	1.5828e+06	2.08286e+06	1.68544e+06	2.46561e+06	1.46015e+06	1.13102e+06	1.8149e+06	1.83576e+06	1.69402e+06	1.4473e+06	2.49803e+06	4.22251e+06	3.90939e+06	4.6918e+06	2.13658e+06	1.08828e+06	2.6524e+06	28901.6	2.20574e+06	2.08961e+06	2.15287e+06	2.08392e+06	2.19622e+06	2.09999e+06	29538.9	2.68342e+06	5.69766e+06	1.24166e+06	1.06858e+06	764329	3.23391e+06
3-dehydrocarnitine@4.675-rp	3.1122e+06	5.80922e+06	4.88718e+06	1.03732e+07	3.53438e+06	3.9609e+06	5.19649e+06	5.63941e+06	6.02257e+06	5.43253e+06	2.00776e+06	4.12187e+06	2.90018e+06	5.73647e+06	5.88558e+06	4.09073e+06	5.11684e+06	7.13717e+06	6.25161e+06	3.46992e+06	5.41035e+06	5.00062e+06	3.03681e+06	5.02439e+06	80710.4	4.90331e+06	4.74282e+06	4.57949e+06	4.81729e+06	4.74285e+06	4.54472e+06	86256.3	5.4519e+06	4.94903e+06	1.82915e+06	2.66488e+06	1.75824e+06	3.28293e+06
159.12573@1.389-rp	1.03927e+07	1.36783e+07	1.5173e+07	1.3944e+07	2.05636e+07	1.12561e+07	3.19858e+07	1.67009e+07	7.70873e+06	2.18746e+07	1.85964e+07	27126783	1.16947e+07	2.39929e+07	1.56674e+07	17173980	1.23651e+07	1.86635e+07	2.73232e+07	1.67538e+07	1.70749e+07	1.73185e+07	1.0628e+07	2.69835e+07	72132.6	2.70687e+07	1.84813e+07	2.14508e+07	2.18782e+07	1.99596e+07	2.23167e+07	62776.3	2.38899e+07	3.63305e+07	2.59649e+07	3.769e+07	4.04584e+07	3.88376e+07
159.12575@1.221-rp	1.99887e+07	1.75581e+07	2.4178e+07	2.40872e+07	2.81917e+07	1.54731e+07	3.91135e+07	2.01496e+07	1.8426e+07	3.65762e+07	2.4807e+07	5.17241e+07	1.60011e+07	1.83655e+07	2.19045e+07	2.44872e+07	1.34389e+07	2.03866e+07	3.87709e+07	3.00871e+07	2.28056e+07	2.01209e+07	1.82907e+07	3.91195e+07	33253.1	3.19043e+07	3.78422e+07	2.95779e+07	3.1626e+07	2.96883e+07	2.98638e+07	26831.6	4.88195e+07	5.37323e+07	5.04344e+07	5.41906e+07	6.6208e+07	5.34073e+07
160.02207@0.834-rp	1.16808e+08	1.21339e+08	1.43561e+08	1.16294e+08	1.60804e+08	1.20821e+08	1.55818e+08	1.32378e+08	9.94694e+07	1.3086e+08	146632117	1.35604e+08	1.1318e+08	153359993	8.71491e+07	1.115e+08	1.52746e+08	1.28967e+08	1.77118e+08	1.39966e+08	1.30246e+08	1.8829e+08	1.27958e+08	1.39998e+08	7.73207e+06	1.5253e+08	1.42126e+08	1.31596e+08	1.42469e+08	1.39061e+08	1.36343e+08	8.84549e+06	1.03471e+08	1.42871e+08	3.09104e+07	1.26177e+08	1.47358e+08	1.37213e+08
2-formylglutaricacid@1.022-rp	2.85797e+06	3.44369e+06	2.78211e+06	4.70836e+06	5.21251e+06	4.31165e+06	4.24151e+06	3.44899e+06	3.92908e+06	4.86542e+06	3.12622e+06	3.41702e+06	3.32622e+06	4.59879e+06	3.99394e+06	4.52789e+06	3.72111e+06	4.63495e+06	4.91131e+06	4.41796e+06	3.81002e+06	5.29758e+06	2.75534e+06	3.94118e+06	85987.3	3.92638e+06	4.12857e+06	4.22622e+06	4.21905e+06	3.27157e+06	4.79921e+06	238366	4.32646e+06	3.18797e+06	3.94662e+06	3.93019e+06	3.75589e+06	2.66894e+06
2-formylglutaricacid@1.981-rp	589698	628340	509676	896418	689099	520992	676026	448293	587854	390148	623824	775037	281285	889383	714508	612112	835900	1.76027e+06	247693	416743	948658	843292	69579.1	918603	32898.4	325423	302044	312919	225005	382366	368877	258980	752935	393597	270001	737432	518029	623693
2,2-dimethylglutaricacid@6.698-rp	1.13208e+06	1.30025e+06	831845	2.91853e+06	2.51736e+06	1.13179e+06	1.72941e+06	1.71043e+06	2.19168e+06	1.74893e+06	1.92957e+06	1.84533e+06	2.68499e+06	2.16736e+06	1.84558e+06	2.12252e+06	2.34593e+06	2.85049e+06	2.54835e+06	1.74451e+06	2.06997e+06	2.08885e+06	1.87042e+06	2.1953e+06	185365	1.97783e+06	2.20849e+06	2.16182e+06	1.86734e+06	1.86784e+06	2.46677e+06	161339	1.65786e+06	3.38755e+06	1.59207e+06	1.64055e+06	1.45285e+06	2.51004e+06
Anatabine@3.078-rp	307875	498349	319419	583839	547255	367614	497745	444411	418785	430537	552281	404851	455132	634299	490369	605739	381611	595863	641915	553297	708552	625081	323715	555190	17950.3	528480	481061	529179	517200	539145	499132	17497.5	736236	721351	568487	712825	526261	461213
N6-methyllysine@0.893-rp	1.74728e+06	1.50762e+06	1.50839e+06	2.24604e+06	2.49454e+06	1.95175e+06	2.19907e+06	3.72232e+06	3.32842e+06	2.92575e+06	2.44469e+06	3.40556e+06	3.35937e+06	2.80075e+06	2.91393e+06	3.41209e+06	2.97113e+06	2.86952e+06	4.61728e+06	2.94087e+06	4.06548e+06	3.13762e+06	2.86736e+06	2.64603e+06	176404	3.05473e+06	3.2226e+06	2.9659e+06	3.24102e+06	4.54147e+06	3.12157e+06	137158	2.87992e+06	3.49648e+06	1.52352e+06	3.649e+06	2.74743e+06	3.49496e+06
161.01123@1.275-rp	2.55225e+06	3.71202e+06	3.04155e+06	3.26481e+06	3.50348e+06	2.7478e+06	4.89894e+06	2.94328e+06	3.60293e+06	2.98645e+06	4.81046e+06	4.98896e+06	3.61233e+06	4.98441e+06	3.28918e+06	4.22161e+06	3.29263e+06	4.08386e+06	4.18581e+06	3.92964e+06	5.08852e+06	1.50681e+06	2.13806e+06	5.12189e+06	115441	2.97253e+06	4.9299e+06	3.72285e+06	3.95005e+06	3.94927e+06	4.28536e+06	129873	4.19604e+06	4.5714e+06	4.27881e+06	4.89171e+06	3.90004e+06	4.14232e+06
161.01444@1.264-rp	1.70735e+08	1.91508e+08	1.663e+08	2.05374e+08	1.74536e+08	1.62892e+08	3.57642e+08	2.8539e+08	2.20011e+08	2.71776e+08	2.87588e+08	2.96166e+08	254799274	2.65828e+08	2.25677e+08	2.62231e+08	2.05723e+08	2.51459e+08	2.74807e+08	2.53481e+08	2.87649e+08	2.87381e+08	1.54084e+08	2.25393e+08	486019	2.65699e+08	2.72425e+08	243999991	2.62354e+08	245842983	245851153	546777	2.90018e+08	264550969	2.46764e+08	3.29351e+08	2.25117e+08	2.51402e+08
2,4-quinolinediol@6.537-rp	40334.8	51264.5	37774	63388.3	58270.1	64749.8	312394	149115	165190	1.60417e+06	207364	187294	178240	133477	338628	103829	160702	90428.7	246317	160307	81384.5	180938	205575	293050	26729.9	209407	186942	196947	229735	227605	194403	24294.8	87538.5	64018.9	78625.6	30753.8	137149	83779.5
S-trans-1-Propenyl-L-cysteine@1.677-rp	1.69347e+06	2.35816e+06	1.04134e+06	1.82537e+06	1.46174e+06	958327	3.59026e+06	3.9075e+06	2.01128e+06	2.27121e+06	3.33051e+06	2.27729e+06	2.89082e+06	6.20317e+06	2.26426e+06	5.09186e+06	2.53455e+06	3.96068e+06	3.81243e+06	3.48466e+06	4.14564e+06	4.67537e+06	1.94327e+06	3.25251e+06	22378	3.69814e+06	3.84081e+06	3.37477e+06	3.16413e+06	3.22619e+06	2.6577e+06	19783.1	6.05077e+06	3.39555e+06	3.47978e+06	4.12282e+06	2.6314e+06	2.13556e+06
2-aminoadipicacid@1.168-rp	3.33807e+06	6.35301e+06	3.64751e+06	897983	5.5047e+06	402683	6.37332e+06	8.96181e+06	1.19372e+07	1.32128e+07	2.6469e+07	9.60167e+06	1.17872e+07	7.12572e+06	1.55308e+07	3.94575e+06	5.87067e+06	8.56808e+06	6.06396e+06	9.8245e+06	7.93492e+06	1.00293e+07	320217	7.3614e+06	31242	8.9073e+06	8.47352e+06	5.63362e+06	8.42948e+06	7.8493e+06	7.87893e+06	94414.7	952339	792416	9.46354e+06	1.89407e+06	3.18656e+06	993808
2-aminoadipicacid@1.059-rp	1.92821e+07	6.02205e+07	1.82775e+07	4.78782e+07	3.43066e+07	2.94182e+07	2.31603e+07	2.51238e+07	1.20571e+07	1.44865e+07	2.09806e+07	3.55419e+07	1.11903e+07	2.35846e+07	1.29902e+07	1.47607e+07	3.48724e+07	4.02309e+07	4.61628e+07	4.1931e+07	3.70008e+07	2.8481e+07	2.72175e+07	3.87055e+07	185085	2.9809e+07	2.88006e+07	3.09432e+07	2.90938e+07	3.00493e+07	2.99909e+07	316096	5.83978e+07	7.49163e+07	1.07471e+07	4.13521e+07	1.4975e+07	4.77748e+07
2-aminoadipicacid@1.749-rp	584435	1.59375e+06	747844	996475	931399	758410	1.55683e+06	551163	730717	835663	671104	503196	343624	823192	677445	763535	650745	1.19662e+06	1.3306e+06	1.34402e+06	1.12917e+06	928870	425176	1.24848e+06	15839.9	1.00986e+06	788753	866794	738610	836843	836255	15626.5	664525	1.23017e+06	364669	371881	364211	798545
Carnitine@1.019-rp	856118573	6.91664e+08	6.76719e+08	1008519200	1215913918	7.11873e+08	785585254	7.59109e+08	4.67024e+08	7.5681e+08	7.2595e+08	8.35465e+08	4.29874e+08	8.21539e+08	5.81717e+08	7.33498e+08	7.78802e+08	9.44543e+08	1095425182	8.49888e+08	8.48409e+08	711054541	5.42835e+08	1161718351	92276.1	858255868	801783617	7.47845e+08	7.92784e+08	7.79165e+08	8.46835e+08	907378	9.77632e+08	1077892475	4.94785e+08	9.65058e+08	8.33363e+08	6.8468e+08
162.01798@1.386-rp	444452468	4.76504e+08	4.78089e+08	6.55842e+08	5.86335e+08	3.72521e+08	671137658	6.55117e+08	5.51657e+08	5.32824e+08	4.25897e+08	5.96753e+08	5.44161e+08	7.17437e+08	6.25846e+08	7.4082e+08	5.483e+08	4.69147e+08	6.50468e+08	5.45549e+08	6.64671e+08	6.47986e+08	4.12281e+08	6.59715e+08	25974.7	5.95881e+08	5.28355e+08	5.59968e+08	5.87421e+08	553874794	5.28964e+08	419364	4.66545e+08	5.95446e+08	4.30251e+08	5.1825e+08	5.20516e+08	4.80374e+08
162.01959@0.835-rp	8.74415e+06	9.06897e+06	1.06798e+07	9.10794e+06	1.22899e+07	8.86226e+06	1.13104e+07	1.05178e+07	7.00366e+06	9.46404e+06	1.07103e+07	1.13621e+07	7.94512e+06	1.15654e+07	6.52487e+06	8.16445e+06	1.18711e+07	1.09894e+07	1.40989e+07	1.11392e+07	1.00266e+07	1.4915e+07	9.52937e+06	1.09882e+07	659570	1.07183e+07	1.09696e+07	9.74e+06	1.14854e+07	1.06502e+07	1.11605e+07	761639	7.661e+06	1.06839e+07	1.76558e+06	10036999	1.11766e+07	1.06466e+07
162.05012@2.113-rp	4.67385e+06	5.04651e+06	2.9225e+06	6.90891e+06	4.44719e+06	3.67419e+06	3.70642e+06	7.1635e+06	4.85176e+06	4.84489e+06	4.75774e+06	4.05034e+06	4.11709e+06	7.31451e+06	5.48823e+06	5.8722e+06	5.69743e+06	6.87588e+06	7.33569e+06	2.92923e+06	2.71164e+06	5.1769e+06	3.75522e+06	6.38627e+06	19783.6	7.19206e+06	5.21936e+06	5.4789e+06	5.28687e+06	5.08672e+06	5.26781e+06	30449.9	8.98157e+06	8.45269e+06	6.48662e+06	6.45736e+06	3.96752e+06	3.05012e+06
2,3-dimethylmalicacid@1.059-rp	1.16705e+08	1.4092e+08	114412923	2.18496e+08	2.1896e+08	1.93202e+08	1.20475e+08	1.34169e+08	1.45569e+08	1.82745e+08	1.59879e+08	138488900	1.50092e+08	153062335	153167094	1.55168e+08	1.83338e+08	1.62266e+08	1.7742e+08	2.16254e+08	1.34528e+08	1.3596e+08	1.22889e+08	1.99202e+08	1.95107e+06	1.65816e+08	1.64243e+08	1.54886e+08	1.64985e+08	1.59203e+08	1.68742e+08	2.9384e+06	1.97395e+08	1.37522e+08	1.81798e+08	1.69647e+08	1.90238e+08	9.42913e+07
2,3-dimethylmalicacid@1.73-rp	7.46402e+06	8.84332e+06	8.12746e+06	1.59967e+07	1.48679e+07	9.43899e+06	1.03755e+07	7.63528e+06	9.82998e+06	9.64277e+06	9.54392e+06	1.06385e+07	1.16113e+07	1.03524e+07	1.12774e+07	1.61554e+07	1.06018e+07	1.09422e+07	1.11388e+07	9.88803e+06	1.05906e+07	1.19089e+07	7.51179e+06	1.29415e+07	86462.8	1.03919e+07	1.3514e+07	1.02753e+07	1.00693e+07	1.05137e+07	1.17958e+07	1.13848e+06	9.8331e+06	1.28886e+07	1.40709e+07	1.00169e+07	9.26893e+06	7.49026e+06
Glycylserine@0.998-rp	915048	609911	965103	1.34644e+06	1.65158e+06	947550	1.22462e+06	1.17045e+06	1.28311e+06	1.17208e+06	1.50939e+06	1.35364e+06	1.02495e+06	1.06014e+06	1.55248e+06	943463	1.21207e+06	2.14009e+06	3.36442e+06	2.00244e+06	1.76676e+06	2.00364e+06	917593	1.87719e+06	286310	1.47075e+06	1.3067e+06	1.10351e+06	1.63778e+06	1.23872e+06	1.3946e+06	292311	2.75961e+06	3.11787e+06	1.15051e+06	1.52662e+06	1.29725e+06	1.18136e+06
2-deoxystreptamine@0.879-rp	805312	615374	546060	700198	975966	499420	817894	1.04233e+06	842272	922838	682932	710522	723897	1.4325e+06	985494	798438	1.15453e+06	1.96522e+06	2.24764e+06	976836	1.87678e+06	1.58317e+06	1.03025e+06	1.16398e+06	315694	1.66829e+06	1.03535e+06	1.11181e+06	1.0607e+06	1.06074e+06	1.21939e+06	345628	2.0284e+06	847332	599095	1.33693e+06	907669	748905
162.1045@12.958-rp	1.13849e+06	1.36672e+06	1.09618e+06	2.18476e+06	2.19189e+06	1.34621e+06	2.07336e+06	1.77854e+06	1.5618e+06	1.59201e+06	1.37127e+06	2.07584e+06	1.47015e+06	2.03181e+06	1.33176e+06	1.5399e+06	2.26691e+06	1.79255e+06	1.57711e+06	1.6634e+06	2.23915e+06	1.46733e+06	1.38114e+06	1.97744e+06	204899	1.60995e+06	1.56969e+06	1.57313e+06	1.72648e+06	1.75626e+06	1.98178e+06	459728	2.09088e+06	1.74752e+06	1.6424e+06	1.74082e+06	1.7121e+06	1.53161e+06
162.97043@0.982-rp	6.41689e+07	4.66645e+07	8.03118e+07	1.08346e+08	8.10375e+07	2.8652e+07	1.2353e+08	1.42623e+08	1.01209e+08	8.47768e+07	7.17279e+07	1.308e+08	1.1428e+08	2.02335e+08	1.35428e+08	1.65368e+08	157511757	1.84019e+08	2.06719e+08	1.47552e+08	1.72479e+08	2.21947e+08	7.43238e+07	1.82326e+08	129346	1.32483e+08	1.27716e+08	1.14315e+08	1.40628e+08	1.21499e+08	1.41417e+08	128710	1.37854e+08	1.70047e+08	8.7e+07	1.59204e+08	1.25993e+08	1.12555e+08
163.0008@0.963-rp	6.24407e+06	6.13117e+06	5.52095e+06	1.0096e+07	1.16463e+07	7.11802e+06	1.17836e+07	5.15473e+06	9.09198e+06	1.0499e+07	8.24064e+06	8.90238e+06	7.34595e+06	1.09272e+07	6.51299e+06	9.73897e+06	9.655e+06	9.57874e+06	9.10588e+06	9.93293e+06	9.137e+06	1.39702e+07	6.25609e+06	8.51132e+06	86588.5	8.88861e+06	1.01166e+07	8.77957e+06	8.24819e+06	9.88374e+06	1.03875e+07	91047.1	1.12284e+07	1.30967e+07	9.38552e+06	1.0842e+07	8.94777e+06	7.71354e+06
163.0494@2.747-rp	2.20507e+06	3.23309e+06	3.39114e+06	5.01925e+06	4.27391e+06	4.55686e+06	3.94636e+06	4.88751e+06	4.22916e+06	6.58303e+06	3.87204e+06	4.87554e+06	4.25474e+06	4.10235e+06	6.98314e+06	3.92038e+06	5.63547e+06	5.4159e+06	6.24123e+06	4.11417e+06	4.59769e+06	4.4938e+06	4.01757e+06	7.2684e+06	36827	4.3236e+06	4.339e+06	4.86888e+06	5.41193e+06	5.45075e+06	5.55951e+06	73876.4	4.09177e+06	3.80024e+06	4.16026e+06	6.22939e+06	4.21264e+06	3.27314e+06
163.04958@2.135-rp	1.54621e+06	1.04475e+06	643605	1.7994e+06	1.30683e+06	887709	934430	1.88024e+06	942733	835427	721430	936820	674964	1.42802e+06	949163	1.34174e+06	867437	1.37292e+06	1.57428e+06	1.64325e+06	2.09456e+06	1.07629e+06	847961	1.28794e+06	21583.1	1.58118e+06	1.38649e+06	1.25555e+06	1.22968e+06	1.03526e+06	889532	21653.5	2.47764e+06	1.68732e+06	1.63452e+06	1.78828e+06	745285	670543
3-hydroxy-3-methyloxindole@10.93-rp	532138	1.29742e+06	1.00068e+06	1.18257e+06	1.18085e+06	802050	1.22848e+06	888461	1.83057e+06	1.97661e+06	1.3106e+06	1.26694e+06	2.46154e+06	1.11384e+06	2.4222e+06	1.27297e+06	1.35265e+06	972899	1.82441e+06	1.17791e+06	1.09552e+06	1.4996e+06	886616	1.65142e+06	383241	1.33274e+06	1.35375e+06	1.25467e+06	1.37625e+06	1.40066e+06	1.35335e+06	418390	1.21036e+06	1.09027e+06	1.11325e+06	1.82362e+06	1.46857e+06	1.26989e+06
163.99353@0.889-rp	2.77762e+06	2.6116e+06	2.3765e+06	1.53387e+06	1.86393e+06	2.36765e+06	2.15576e+06	2.50737e+06	1.35166e+06	1.74557e+06	2.3237e+06	2.10889e+06	1.82922e+06	2.79452e+06	977677	1.59548e+06	2.48597e+06	2.52144e+06	1.95034e+06	1.44948e+06	1.79234e+06	2.49118e+06	2.70799e+06	1.67024e+06	227078	2.22052e+06	1.974e+06	2.15842e+06	2.39124e+06	2.59453e+06	2.36666e+06	176558	970035	1.85074e+06	276697	2.03417e+06	3.00026e+06	1.65922e+06
164.03208@1.42-rp	7.354e+06	7.13788e+06	7.503e+06	1.19426e+07	9.56575e+06	7.02241e+06	8.42822e+06	1.1404e+07	1.33633e+07	1.2281e+07	8.34852e+06	7.27568e+06	1.26309e+07	9.2494e+06	1.80863e+07	7.33095e+06	9.07787e+06	1.04052e+07	1.02842e+07	1.1245e+07	8.37558e+06	1.10965e+07	7.50151e+06	1.23266e+07	72626.8	8.41136e+06	1.00523e+07	9.99982e+06	1.01562e+07	9.96635e+06	1.03802e+07	74019.4	8.56517e+06	1.0695e+07	8.68369e+06	1.17386e+07	7.65022e+06	5.8763e+06
164.03212@1.055-rp	1.12036e+07	1.54273e+07	1.34375e+07	1.95137e+07	2.27663e+07	1.77405e+07	1.68627e+07	1.29157e+07	2.1381e+07	2.30717e+07	1.75546e+07	2.55694e+07	1.87052e+07	1.76982e+07	2.58359e+07	1.97722e+07	2.62554e+07	1.80552e+07	1.97227e+07	1.95705e+07	1.78059e+07	2.27705e+07	1.54905e+07	2.48921e+07	102052	1.4951e+07	2.0315e+07	1.92225e+07	1.94778e+07	1.84396e+07	2.29976e+07	93165.2	1.60529e+07	1.76457e+07	1.56187e+07	2.03952e+07	2.00361e+07	1.68521e+07
164.0435@0.828-rp	4.95236e+07	4.92457e+07	5.87556e+07	4.88621e+07	6.24382e+07	4.8944e+07	6.25049e+07	5.56819e+07	3.95712e+07	5.40001e+07	5.85567e+07	5.92352e+07	4.74002e+07	6.47646e+07	3.61478e+07	4.67695e+07	6.21232e+07	5.64236e+07	7.30011e+07	5.7886e+07	5.24801e+07	7.74623e+07	5.39851e+07	5.67221e+07	2.11274e+06	5.4663e+07	5.8742e+07	5.53742e+07	6.01768e+07	5.67647e+07	5.88663e+07	2.11756e+06	4.36486e+07	5.89363e+07	1.35819e+07	5.20939e+07	6.1884e+07	6.29154e+07
2-hydroxy-3-phenylpropenoicacid@1.457-rp	2.07414e+08	3.04055e+08	2.16321e+08	4.36264e+08	337306488	3.14021e+08	2.83883e+08	3.03407e+08	3.06119e+08	3.26372e+08	3.39037e+08	2.87846e+08	2.78918e+08	315466483	3.85236e+08	3.36112e+08	3.11041e+08	3.65569e+08	4.50835e+08	4.14172e+08	3.74589e+08	3.11806e+08	2.33589e+08	4.17878e+08	1.1999e+06	3.64726e+08	3.29299e+08	3.34439e+08	3.53317e+08	3.75136e+08	3.37489e+08	1.34511e+06	4.19599e+08	3.91227e+08	3.8453e+08	3.94909e+08	2.78951e+08	2.03422e+08
2-hydroxy-3-phenylpropenoicacid@3.936-rp	532185	789636	1.03904e+06	1.38888e+06	665987	444613	639094	1.29063e+06	1.04649e+06	1.04948e+06	1.10945e+06	1.16622e+06	1.10644e+06	916607	801981	1.26913e+06	1.36942e+06	1.09676e+06	1.38491e+06	1.50693e+06	1.476e+06	1.57087e+06	685840	1.34408e+06	130041	991882	1.06082e+06	932357	1.0845e+06	1.18066e+06	1.119e+06	164890	613544	1.11026e+06	582030	615618	968514	699559
2-hydroxy-3-phenylpropenoicacid@4.367-rp	275992	442733	300854	675532	284392	367093	893106	490948	428400	515911	552700	433333	278915	587267	473017	514162	383851	665873	973558	714303	932472	697267	250980	957180	25766.4	533219	526163	504820	525416	511806	524933	62709.2	549335	601716	315151	286288	223869	631984
1,5-anhydroglucitol@1.163-rp	2.55907e+06	2.43601e+06	2.46184e+06	1.10267e+07	3.41694e+06	3.15317e+06	2.77442e+06	6.33109e+06	1.01247e+07	1.31306e+07	3.49156e+06	3.86388e+06	5.3079e+06	7.61446e+06	2.71042e+07	3.13794e+06	4.04279e+06	3.56858e+06	7.26405e+06	3.93477e+06	7.38708e+06	6.90405e+06	2.6527e+06	6.95222e+06	41390.1	5.87651e+06	6.27607e+06	5.86593e+06	6.07086e+06	4.64544e+06	4.86989e+06	71817.6	8.15616e+06	1.08434e+07	2.85965e+06	4.95634e+06	4.05259e+06	2.36361e+06
2-methoxy-5-prop-1-enylphenol@13.451-rp	1.23282e+06	799528	445541	969298	837827	1.20694e+06	696179	768059	684666	1.02251e+06	972865	874605	737887	828163	801669	930240	807444	1.05545e+06	809227	722753	461414	677135	887930	649211	51917	878179	847141	808698	806922	820066	815079	152685	746602	811073	964687	964901	908216	728972
164.12015@11.615-rp	1.19827e+06	1.59968e+06	1.50847e+06	1.64889e+06	2.30218e+06	1.89887e+06	1.28614e+06	1.77659e+06	1.55835e+06	1.63092e+06	1.9872e+06	1.74199e+06	1.18005e+06	1.67201e+06	1.86603e+06	1.3858e+06	2.0197e+06	1.60098e+06	1.32895e+06	1.87914e+06	1.55643e+06	1.81419e+06	1.73687e+06	2.11716e+06	99057.6	1.46123e+06	1.48218e+06	1.41595e+06	1.73467e+06	1.84073e+06	1.90806e+06	262311	1.78908e+06	1.50307e+06	802667	1.97283e+06	1.6418e+06	1.519e+06
4-pyridoxolactone@6.488-rp	276819	709340	816157	534197	691996	527102	911338	557942	1.25319e+06	1.20477e+06	851882	793608	1.85337e+06	514084	1.60462e+06	650368	983959	502658	1.05966e+06	620676	455149	932907	734796	879524	24278.1	819776	830011	771855	972924	880689	812284	17817.9	522994	684429	459799	920967	929214	847799
165.04563@1.03-rp	418886	863974	289404	687302	707325	551361	387095	458658	654779	1.32682e+06	948457	686310	729570	357107	1.40727e+06	556594	926482	1.27086e+06	1.19882e+06	1.06625e+06	734230	1.05276e+06	257508	884643	41371	665250	590454	724630	558721	845848	937678	39588.4	500230	862815	598956	718073	518755	621468
165.04707@1.041-rp	603566	635258	767440	621297	445082	511136	1.56092e+06	875936	518525	1.02131e+06	451103	846701	470264	1.20025e+06	895708	1.67175e+06	1.21645e+06	673393	1.14482e+06	572705	496042	1.07082e+06	644236	813352	19233.6	1.12e+06	732417	758351	725975	1.07226e+06	900192	18928.9	791335	621572	468408	463231	530020	750425
7-methylguanine@2.748-rp	877080	1.20939e+06	876458	1.70049e+06	1.37063e+06	899550	2.23318e+06	1.27685e+06	1.33595e+06	1.68634e+06	1.67082e+06	1.26674e+06	1.28812e+06	2.13774e+06	1.24854e+06	1.38283e+06	1.37083e+06	1.55484e+06	2.08148e+06	1.46687e+06	1.83063e+06	1.72977e+06	998917	1.91486e+06	20921.6	1.56394e+06	1.48942e+06	1.46173e+06	1.27376e+06	1.61774e+06	1.40711e+06	19158.3	1.7589e+06	2.02657e+06	1.76462e+06	1.87588e+06	1.32596e+06	1.102e+06
4-hydroxypyridinyl-butanone@1.904-rp	3.64559e+08	4.72473e+08	3.49896e+08	6.66589e+08	5.63235e+08	4.83208e+08	5.70883e+08	552099241	4.96871e+08	563541010	6.60087e+08	4.74893e+08	5.4782e+08	7.03175e+08	550191149	6.90653e+08	5.46191e+08	6.01659e+08	8.27331e+08	5.62667e+08	7.09916e+08	7.02823e+08	3.86687e+08	7.49428e+08	993417	638653796	553530283	5.8915e+08	5.59609e+08	6.01595e+08	614374735	1.20284e+06	8.1736e+08	6.35325e+08	5.66265e+08	6.54197e+08	5.77148e+08	4.42487e+08
1,3-benzodioxole-5-carboxylicacid@5.344-rp	710445	792854	1.05521e+06	583758	6.5534e+06	1.02571e+06	765593	673954	929325	713280	2.69951e+06	502843	516920	1.04039e+06	1.18684e+06	744958	755904	817819	981123	703260	677792	1.1976e+06	853207	1.91472e+06	672301	1.33332e+06	1.27651e+06	1.24612e+06	1.27233e+06	1.26162e+06	1.29859e+06	605354	1.30441e+06	765756	2.34046e+06	2.12512e+06	905785	589439
Arabinonicacid@1.044-rp	1.32353e+07	1.68948e+07	1.06302e+07	1.7677e+07	2.17525e+07	1.27623e+07	2.27468e+07	2.08825e+07	2.80266e+07	1.9587e+07	2.23228e+07	2.74849e+07	2.44204e+07	3.30525e+07	2.90258e+07	3.13354e+07	2.65535e+07	3.09888e+07	3.37588e+07	3.81121e+07	3.85327e+07	3.71819e+07	1.69704e+07	4.61934e+07	42527.3	2.54094e+07	2.50235e+07	2.74406e+07	2.59479e+07	2.58544e+07	2.85441e+07	92085.5	2.23826e+07	4.22126e+07	1.90873e+07	2.06536e+07	2.67731e+07	2.19244e+07
1-methylxanthine@8.555-rp	614901	1.89742e+06	2.16337e+06	3.56279e+06	1.16271e+06	1.52356e+06	1.02787e+06	1.83167e+06	1.28911e+06	1.35306e+06	745287	1.26127e+06	1.44356e+06	4.75384e+06	1.35948e+06	1.39158e+06	1.54067e+06	1.95267e+06	1.30798e+06	1.35096e+06	3.806e+06	1.72021e+06	582239	1.54504e+06	560178	1.9535e+06	2.45865e+06	2.39335e+06	3.23388e+06	3.70495e+06	4.0532e+06	1.01156e+06	1.38377e+06	2.66622e+06	781330	3.92113e+06	1.23998e+06	2.08798e+06
2-methoxy-2-phenylaceticacid@7.031-rp	184747	275514	133155	298428	275299	163122	1.31545e+06	618695	716365	675217	959320	470724	515512	857997	1.18623e+06	784064	609434	719491	1.88985e+06	1.36432e+06	1.62853e+06	1.33684e+06	476551	1.05166e+06	63909.6	747465	785413	743258	615051	624637	722421	108937	566983	1.01556e+06	203046	259643	320448	787153
2-methoxy-2-phenylaceticacid@8.169-rp	22847.1	140115	125578	121504	152517	22936.1	222149	256034	191495	1.5864e+06	406015	301793	76547.6	182178	178808	23079.8	67395.8	140209	699734	375989	301436	117937	243299	276941	55979.8	239398	251949	203543	234078	217080	238095	106349	235412	346926	149561	360047	173095	101613
8-Oxogeranial@9.693-rp	312886	104824	127480	171689	821321	761954	2.60906e+06	684993	7.00574e+06	2.20864e+06	3.93922e+06	765638	1.36802e+07	1.39856e+07	1.16521e+07	1.8655e+07	1.05033e+07	1.77843e+07	3.11068e+06	4.88538e+06	2.04085e+06	1.94488e+07	1.1484e+06	747973	315716	4.92848e+06	4.91048e+06	4.9563e+06	5.84973e+06	5.14226e+06	5.31251e+06	74699.3	344346	141209	645823	790057	63603	757520
8-Oxogeranial@7.035-rp	229715	2.14233e+06	2.79488e+06	2.66327e+06	2.73735e+06	2.32791e+06	4.92824e+06	972392	1.28401e+06	2.93747e+06	2.35567e+06	5.89353e+06	2.15252e+06	989821	2.45032e+06	1.50315e+06	2.72516e+06	2.41606e+06	4.65982e+06	1.31874e+06	763950	2.57961e+06	1.17324e+06	4.69385e+06	560939	2.29785e+06	2.50888e+06	3.01811e+06	3.54001e+06	3.56888e+06	4.54557e+06	81577.7	900268	1.67904e+06	2.42347e+06	4.11728e+06	5.36156e+06	3.46697e+06
8-Oxogeranial@6.623-rp	83289.1	327425	432152	409007	470749	353663	662293	303835	269539	517465	430377	639441	515578	429449	487402	355838	532108	544618	628156	308028	292490	461610	279100	745869	18135.1	396407	482861	591266	591650	649377	695220	26376.7	113252	282178	408741	597693	525814	462479
167.02522@1.386-rp	4.39931e+06	1.51936e+06	4.16336e+06	1.23369e+07	3.80007e+06	2.68775e+06	3.86405e+06	9.65134e+06	1.31622e+07	6.69458e+06	4.8397e+06	8.95834e+06	1.46644e+07	1.06518e+07	1.53045e+07	4.76611e+06	1.39632e+07	9.10144e+06	8.59284e+06	9.33742e+06	7.32176e+06	1.48959e+07	7.3746e+06	1.50519e+07	20070.1	1.02516e+07	9.04406e+06	9.40144e+06	1.06958e+07	8.63124e+06	8.59689e+06	19585.7	1.55435e+07	1.02111e+07	1.33929e+07	1.90955e+07	7.35159e+06	2.57041e+06
167.02525@1.251-rp	2.69456e+06	1.42454e+06	2.15762e+06	8.99819e+06	2.67295e+06	1.96972e+06	2.84362e+06	6.13653e+06	5.64e+06	3.52882e+06	3.2137e+06	6.99888e+06	7.59744e+06	8.72867e+06	7.92379e+06	2.83407e+06	7.66259e+06	5.63944e+06	5.10476e+06	3.46615e+06	5.19009e+06	9.32133e+06	3.99496e+06	7.22154e+06	23669.7	5.76609e+06	5.63153e+06	6.34297e+06	5.62357e+06	5.83499e+06	5.294e+06	14717	8.30542e+06	5.55791e+06	9.35546e+06	1.34691e+07	6.24805e+06	2.15134e+06
3-methoxyanthranilicacid@1.429-rp	1.80887e+06	5.54263e+06	2.95472e+06	6.797e+06	8.27867e+06	7.92356e+06	4.17954e+06	1.76602e+06	4.16787e+06	5.95532e+06	4.44961e+06	2.98198e+06	4.43309e+06	2.81032e+06	5.11216e+06	3.46359e+06	4.70407e+06	5.09326e+06	5.23142e+06	4.68903e+06	2.30518e+06	4.04724e+06	3.43492e+06	4.39615e+06	94326.2	3.91541e+06	4.51985e+06	4.55836e+06	4.75082e+06	5.01329e+06	4.94973e+06	113218	1.90047e+06	3.15773e+06	5.39374e+06	4.20712e+06	4.31428e+06	2.48333e+06
167.98269@1.12-rp	1.13456e+08	1.44106e+08	9.61807e+07	1.28192e+08	1.35143e+08	1.07647e+08	1.75252e+08	1.71432e+08	1.18578e+08	1.33461e+08	1.57339e+08	1.14374e+08	1.22642e+08	1.6558e+08	9.55562e+07	1.06635e+08	1.09184e+08	1.29244e+08	1.54504e+08	1.22337e+08	1.44504e+08	1.3296e+08	1.03696e+08	1.41171e+08	39732.9	1.32256e+08	1.25469e+08	1.26339e+08	130960584	1.26414e+08	1.19129e+08	46773.6	8.55367e+07	102034287	1.22227e+08	1.08161e+08	8.96083e+07	107038287
Urate@4.531-rp	379251	776953	519136	741127	674811	785013	803264	382344	459446	725421	463619	297261	211605	1.5792e+06	741915	663645	592070	1.35994e+06	857062	382926	577058	1.20955e+06	432987	779951	39366.9	613207	633785	567534	674529	671377	648354	46070.9	435932	803077	218806	341207	618414	226973
Uricacid@1.765-rp	2.9992e+08	3.38576e+08	4.16844e+08	3.25929e+08	4.19593e+08	3.42889e+08	9.29587e+08	2.15099e+08	1.53237e+08	3.24119e+08	354801366	2.32754e+08	2.4191e+08	8.9522e+08	2.28161e+08	7.67755e+08	4.19583e+08	617936220	4.82468e+08	2.43254e+08	3.93288e+08	7.18721e+08	3.87926e+08	4.36088e+08	2.47637e+06	4.66669e+08	4.08365e+08	4.12972e+08	4.12706e+08	4.20097e+08	3.95213e+08	2.41241e+06	2.81731e+08	3.71879e+08	2.67564e+08	2.69591e+08	4.70892e+08	3.62577e+08
168.02839@2.392-rp	1.75112e+06	2.13253e+06	1.33503e+06	4.24112e+06	3.34809e+06	3.02665e+06	1.24168e+06	3.26721e+06	4.06964e+06	3.65353e+06	2.85928e+06	2.19222e+06	2.66138e+06	3.53481e+06	4.05565e+06	3.08497e+06	2.16591e+06	3.20853e+06	4.19244e+06	3.05921e+06	3.66202e+06	2.60938e+06	1.21314e+06	3.35188e+06	16631.4	3.19157e+06	3.21284e+06	2.10955e+06	3.45096e+06	3.39435e+06	3.26138e+06	15560.7	4.23702e+06	2.72935e+06	3.98588e+06	3.64027e+06	2.26978e+06	882062
168.08737@0.908-rp	3.14574e+07	3.20604e+07	2.56366e+07	2.93415e+07	2.08298e+07	2.44731e+07	2.33187e+07	3.45435e+07	2.47574e+07	2.43032e+07	3.3847e+07	2.3814e+07	2.87767e+07	3.72499e+07	2.59465e+07	3.431e+07	3.23996e+07	3.56304e+07	2.4396e+07	2.74981e+07	2.38349e+07	3.25728e+07	2.90135e+07	2.38513e+07	248805	2.95273e+07	2.93545e+07	2.71688e+07	2.85617e+07	3.0117e+07	31032367	230686	2.3748e+07	2.83959e+07	2.59643e+07	2.54083e+07	3.21818e+07	2.29228e+07
1-hydroxy-2-oxolimonene@9.435-rp	460648	335085	517829	435840	514999	347441	798123	699884	320616	643783	511333	957341	525839	3.20114e+06	619943	625915	753125	638577	631360	662479	293780	1.13195e+06	1.37227e+06	719595	78665.3	477725	464389	555656	643182	845440	863398	159851	785499	370612	623759	873759	669006	711770
168.1516@14.796-rp	454498	997753	1.08838e+06	1.10988e+06	1.58729e+06	988772	1.00457e+06	1.0005e+06	941559	1.16557e+06	1.43824e+06	1.23459e+06	1.34057e+06	1.25577e+06	1.59643e+06	1.55462e+06	1.19239e+06	1.51544e+06	1.0187e+06	1.40467e+06	965851	2.03928e+06	1.0137e+06	1.7043e+06	76818.7	1.02525e+06	1.28224e+06	1.17718e+06	1.72174e+06	1.61944e+06	1.85332e+06	354447	700703	1.05937e+06	972817	1.32629e+06	1.14726e+06	1.14246e+06
ThiobenzamideS-dioxide@1.259-rp	2.51836e+06	2.56442e+06	2.02979e+06	2.30376e+06	1.93206e+06	2.37244e+06	3.9359e+06	4.07265e+06	2.91001e+06	4.31675e+06	3.70721e+06	3.88093e+06	2.41747e+06	3.59923e+06	2.49801e+06	3.61825e+06	2.87423e+06	2.83873e+06	3.93574e+06	2.72498e+06	4.67061e+06	3.62396e+06	2.05125e+06	2.8309e+06	224118	2.6967e+06	3.614e+06	3.12022e+06	3.62992e+06	3.26515e+06	2.82979e+06	243412	2.73815e+06	3.78366e+06	3.24277e+06	3.55409e+06	3.17986e+06	3.01095e+06
Phosphodimethylethanolamine@1.006-rp	3.24571e+07	3.25366e+07	1.78303e+07	3.98797e+07	3.76631e+07	3.1146e+07	6.62445e+07	3.15165e+07	3.2133e+07	3.66494e+07	5.90929e+07	4.05321e+07	1.6557e+07	2.09121e+07	1.46396e+07	1.85909e+07	1.76207e+07	1.83695e+07	2.54083e+07	2.2376e+07	2.90198e+07	2.7205e+07	1.64884e+07	2.26523e+07	70106.5	2.659e+07	2.70361e+07	2.62331e+07	2.68067e+07	2.56205e+07	2.88666e+07	258594	2.03231e+07	2.58886e+07	2.0333e+07	1.96912e+07	1.62701e+07	2.86424e+07
1-methylhistidine@0.988-rp	5.2021e+06	7.23325e+06	8.18602e+06	7.17726e+06	6.58799e+06	4.35798e+06	1.10773e+07	1.15623e+07	7.43853e+06	7.5973e+06	8.20247e+06	1.23148e+07	4.96469e+06	1.04935e+07	7.83706e+06	6.30586e+06	8.95893e+06	1.22819e+07	1.48589e+07	1.05579e+07	1.05053e+07	1.0432e+07	6.31459e+06	8.94248e+06	14138.8	1.00286e+07	8.27428e+06	8.69555e+06	7.93041e+06	9.23331e+06	1.01036e+07	15192.6	1.1209e+07	1.2654e+07	5.19423e+06	1.09873e+07	7.66087e+06	8.31998e+06
169.95135@0.972-rp	2.16017e+06	7.51895e+06	1.62425e+06	2.13369e+06	1.69814e+06	3.93386e+06	2.86509e+06	5.02786e+06	755767	3.62518e+06	2.75824e+06	964612	1.82141e+06	3.37159e+06	921757	2.01765e+06	904466	2.29011e+06	913535	669525	1.08433e+06	1.24897e+06	3.21402e+06	1.15629e+06	21030.8	1.78798e+06	1.81467e+06	1.70263e+06	2.00235e+06	2.11927e+06	2.12654e+06	20166	915654	1.46059e+06	2.41488e+06	1379268	3.02204e+06	1.87035e+06
Dihydroxyacetonephosphate@1.065-rp	9.3302e+06	3.84427e+06	4.73815e+06	2.39865e+07	1.38337e+07	2.06163e+07	1.03257e+07	5.82732e+06	2.03394e+07	1.56061e+07	1.54049e+07	1.51351e+07	1.24808e+07	7.73759e+06	1.35499e+07	9.20166e+06	1.34419e+07	7.48949e+06	1.10353e+07	9.79865e+06	9.73098e+06	1.5646e+07	7.59358e+06	1.32329e+07	30526.4	1.15222e+07	1.18469e+07	1.16301e+07	1.1202e+07	9.92128e+06	1.12528e+07	81890.4	1.29024e+07	1.05086e+07	1.15859e+07	6.26517e+06	8.44072e+06	5.38838e+06
170.04571@0.926-rp	994968	1.80041e+06	1.03282e+06	4.75613e+06	5.83472e+06	1.55375e+06	4.39496e+06	2.26812e+06	3.09383e+06	3.36086e+06	3.9572e+06	5.12144e+06	1.94362e+06	2.667e+06	3.04206e+06	2.83831e+06	4.22339e+06	3.32914e+06	5.22406e+06	5.5858e+06	3.88396e+06	4.58987e+06	1.11459e+06	3.88951e+06	80524.4	2.96351e+06	3.76485e+06	3.12577e+06	3.01369e+06	3.19544e+06	3.83693e+06	70192.3	7.72656e+06	4.37802e+06	3.92767e+06	4.49098e+06	2.30197e+06	2.78506e+06
170.06899@1.107-rp	905728	1.04357e+06	1.02685e+06	1.75862e+06	1.53337e+06	1.28963e+06	1.74959e+06	1.94506e+06	1.77195e+06	3.0762e+06	1.46709e+06	1.98654e+06	2.11173e+06	2.27945e+06	2.08684e+06	1.69029e+06	1.89679e+06	2.76584e+06	3.38927e+06	2.46403e+06	3.22083e+06	2.54312e+06	1.47412e+06	2.99097e+06	31851.7	1.62903e+06	2.04269e+06	1.76286e+06	1.68669e+06	1.76487e+06	1.81538e+06	30810	1.78023e+06	2.45359e+06	1.58945e+06	2.47645e+06	1.88638e+06	1.69674e+06
3,7-dimethylocta-1,6-dienediol@9.612-rp	2.28392e+06	3.57025e+06	2.47142e+06	3.76636e+06	5.55311e+06	4.08939e+06	2.80851e+06	3.60276e+06	3.21677e+06	3.6648e+06	3.92131e+06	3.25068e+06	3.19379e+06	3.54336e+06	4.39414e+06	2.19392e+06	4.05905e+06	2.97465e+06	3.16984e+06	4.87696e+06	3.89343e+06	4.16286e+06	2.93687e+06	3.46841e+06	41010.3	3.45261e+06	3.52534e+06	3.53355e+06	3.91553e+06	3.52956e+06	3.60442e+06	77268.1	3.0163e+06	3.32562e+06	2.33036e+06	3.87866e+06	3.20044e+06	2.3615e+06
171.02779@2.555-rp	9.16863e+06	8.55215e+06	8.7157e+06	1.16558e+07	1.19548e+07	1.22483e+07	7.49128e+06	9.49806e+06	1.03586e+07	12184773	1.26412e+07	9.27455e+06	1.07508e+07	1.3878e+07	9.48774e+06	1.02612e+07	1.17306e+07	1.40668e+07	1.2105e+07	1.1631e+07	1.00822e+07	1.18802e+07	8.14983e+06	1.3146e+07	2.14515e+06	1.37968e+07	1.2017e+07	1.02875e+07	1.12026e+07	1.07656e+07	1.26016e+07	2.21394e+06	1.28865e+07	1.1874e+07	1.34332e+07	1.28106e+07	1.13972e+07	4.90756e+06
171.03561@7.632-rp	118223	7.48852e+06	88240.5	176497	76271.1	83796.5	138712	145948	423093	307849	5.39327e+06	46489.8	266469	353492	1.70093e+06	107072	64672.9	96213.1	1.09221e+06	459640	72500.8	133581	199499	73119.2	23451.8	650981	892406	645209	631880	694548	630972	24253.7	204137	192475	1.30764e+06	26204.1	143545	601697
Tetrahydrodipicolinicacid@1.451-rp	1.14092e+07	1.4396e+07	1.28663e+07	1.59242e+07	1.19675e+07	9.37348e+06	1.80873e+07	1.91009e+07	1.47896e+07	1.59237e+07	1.4065e+07	1.67745e+07	12627485	2.32454e+07	1.20184e+07	1.67039e+07	2.15612e+07	2.06271e+07	1.65931e+07	1.6767e+07	1.59326e+07	2.16579e+07	1.46768e+07	2.09968e+07	105589	1.87912e+07	1.67169e+07	1.61033e+07	1.67306e+07	1.74883e+07	1.59002e+07	71291.6	1.37486e+07	1.61426e+07	1.43836e+07	1.76292e+07	1.78428e+07	9.90753e+06
Tetrahydrodipicolinicacid@1.677-rp	3.93646e+06	7.00614e+06	2.93277e+06	6.7067e+06	5.38261e+06	4.2274e+06	7.3228e+06	8.58727e+06	4.34581e+06	5.29187e+06	6.97e+06	7.34851e+06	3.28856e+06	6.47685e+06	5.20476e+06	5.0425e+06	8.62311e+06	1.05949e+07	1.06973e+07	8.95862e+06	1.05756e+07	6.74138e+06	4.49837e+06	7.30624e+06	41146	6.5037e+06	6.67332e+06	6.43528e+06	6.71431e+06	6.75791e+06	5.78867e+06	83949.9	8.46467e+06	8.32767e+06	3.65882e+06	6.41503e+06	3.92458e+06	7.56516e+06
171.06417@1.007-rp	2.59435e+06	2.37153e+06	1.93049e+06	3.33483e+06	4.23448e+06	1.87581e+06	4.89311e+06	3.00729e+06	3.35781e+06	4.25724e+06	3.62112e+06	4.20232e+06	3.31901e+06	3.98063e+06	4.36929e+06	3.39728e+06	3.57406e+06	4.60428e+06	7.24773e+06	4.20553e+06	4.57129e+06	4.05416e+06	2.32388e+06	4.21115e+06	71412.6	4.49439e+06	3.62431e+06	3.4753e+06	3.83677e+06	3.59532e+06	3.63947e+06	44272.1	4.48716e+06	5.27693e+06	2.51683e+06	4.09498e+06	3.12749e+06	2.95775e+06
171.08945@2.118-rp	406442	584224	569858	678494	519894	422315	735732	711262	516711	696948	729754	762506	434824	792010	359413	461057	601559	852315	1.01746e+06	640963	723377	808843	461124	704748	37305.5	644174	459732	670685	657733	564126	694762	85795.8	696864	690011	443608	686260	581847	560561
171.51228@1.007-rp	704306	1.03545e+06	2.60335e+06	2.11839e+06	1.8401e+06	815882	1.36682e+06	2.03136e+06	2.44342e+06	2.01989e+06	1.4861e+06	2.57823e+06	728496	2.76646e+06	2.63227e+06	3.10119e+06	2.599e+06	3.10209e+06	1.71031e+06	2.85369e+06	3.19344e+06	3.23341e+06	2.0185e+06	2.85432e+06	38983.2	1.36606e+06	2.74361e+06	2.36203e+06	2.90057e+06	2.54915e+06	2.6656e+06	102096	906051	2.99063e+06	1.35566e+06	2.82389e+06	2.22452e+06	2.85395e+06
171.90971@0.964-rp	2.42929e+06	5.97711e+06	1.78945e+06	3.95991e+06	4.37003e+06	4.81876e+06	4.42277e+06	2.21741e+06	1.7165e+06	3.09671e+06	4.26441e+06	1.63991e+06	2.72838e+06	2.50838e+06	1.29827e+06	1.76529e+06	1.39216e+06	3.18897e+06	2.44556e+06	1.64699e+06	2.27647e+06	2.46684e+06	1.74575e+06	3.18437e+06	22651	2.47674e+06	3.06865e+06	2.81366e+06	3.2896e+06	2.20286e+06	2.97116e+06	13966	2.45385e+06	3.53074e+06	3.35418e+06	2.99154e+06	3.15435e+06	2.11127e+06
171.94861@12.78-rp	190292	1.29122e+06	1.79947e+06	2.25304e+06	604550	1.19706e+06	326500	1.04289e+06	1.07364e+06	1.02415e+06	294985	933266	1.23495e+06	1.99401e+06	1.60978e+06	631873	1.65699e+06	1.6287e+06	1.0523e+06	1.31552e+06	2.15236e+06	1.79381e+06	345773	1.15364e+06	192063	1.30566e+06	1.34578e+06	1.20565e+06	1.14149e+06	1.25495e+06	1.34092e+06	365097	1.36378e+06	1.64238e+06	224764	2.52887e+06	1.08012e+06	996875
Glycerol-2-phosphate@1.062-rp	294685761	4.11512e+08	4.55424e+08	5.21099e+08	6.37856e+08	4.39323e+08	9.13596e+08	5.8991e+08	3.52232e+08	6.16386e+08	334819222	5.67926e+08	4.08349e+08	8.29196e+08	6.43704e+08	8.64837e+08	6.23938e+08	5.13235e+08	6.41418e+08	3.97956e+08	5.32277e+08	8.96291e+08	5.2211e+08	4.96477e+08	262743	5.71454e+08	5.49859e+08	5.2527e+08	5.57625e+08	5.21429e+08	543006671	1.10114e+06	678393298	527564632	5.57619e+08	5.80529e+08	5.82945e+08	5.66771e+08
172.03519@1.028-rp	6.59072e+06	1.01303e+07	9.54118e+06	1.73595e+07	1.65901e+07	8.72581e+06	1.43567e+07	1.06735e+07	1.07978e+07	1.19651e+07	1.0216e+07	1.37219e+07	1.01583e+07	1.38473e+07	1.32921e+07	1.33608e+07	1.35887e+07	1.37428e+07	1.73318e+07	1.47621e+07	1.33054e+07	1.4745e+07	6.81583e+06	1.39416e+07	43798.7	1.55233e+07	1.21267e+07	1.22887e+07	1.23805e+07	1.39764e+07	1.44398e+07	43104.8	1.77625e+07	1.68188e+07	1.56218e+07	2.0952e+07	1.29215e+07	1.00684e+07
172.03691@1.027-rp	514314	693443	322953	1.34163e+06	1.59735e+06	1.17994e+06	1.28799e+06	452377	1.51198e+06	904911	584097	1.99867e+06	1.09022e+06	1.5317e+06	1.10118e+06	1.51723e+06	1.80247e+06	557349	770140	805684	960346	2.39782e+06	984627	1.04036e+06	21794.4	1.28637e+06	1.27076e+06	1.01467e+06	1.11842e+06	1.24661e+06	1.00647e+06	21449.1	1.30414e+06	1.80004e+06	696175	1.49104e+06	973902	1.20822e+06
172.05601@10.002-rp	15949.6	21146.2	17485.6	19002.5	18029.3	17799.5	22813	19133.2	228355	20905.5	21494.4	18132.3	519765	547191	260366	1.03415e+06	302116	876085	36141.5	86526.6	31132	942332	24855.2	18649.5	15428.4	163398	155123	133882	152746	161526	145294	17712.2	17072.8	19844.8	23653.2	20519.6	20651.2	17588
Glycylproline@1.431-rp	1.27115e+06	1.47426e+06	968403	1.47759e+06	1.05869e+06	796571	1.69494e+06	1.52489e+06	1.39612e+06	1.307e+06	978209	1.83862e+06	866347	1.69577e+06	1.3628e+06	2.25443e+06	2.56755e+06	1.59157e+06	2.48057e+06	2.75005e+06	1.99455e+06	2.48558e+06	874299	2.19138e+06	22295.2	2.17417e+06	1.91328e+06	1.51203e+06	1.83621e+06	1.77511e+06	1.35813e+06	21990.2	1.61098e+06	1.97616e+06	1.37427e+06	1.52265e+06	1.49566e+06	2.25458e+06
Glycylproline@1.094-rp	1.36817e+06	1.30275e+06	1.15931e+06	2.25261e+06	2.17996e+06	1.58139e+06	2.36573e+06	1.58303e+06	1.81405e+06	2.37078e+06	2.33738e+06	2.32602e+06	1.90824e+06	2.26968e+06	2.03115e+06	2.51176e+06	2.54101e+06	3.13358e+06	4.76145e+06	3.4612e+06	3.08096e+06	3.06956e+06	1.64706e+06	3.12951e+06	132062	2.36171e+06	2.12768e+06	2.25405e+06	2.57042e+06	2.16368e+06	2.15068e+06	102553	3.44346e+06	3.15849e+06	1.92115e+06	2.39411e+06	2.14064e+06	2.04423e+06
4-aminobenzenesulfonicacid@4.008-rp	622590	487624	598532	5.98328e+06	1.40017e+06	2.0168e+06	2.00371e+06	1.84981e+06	4.17493e+06	4.21783e+06	3.4407e+06	2.60289e+06	1.97086e+06	1.28981e+06	2.54995e+06	1.52903e+06	2.72885e+06	2.56019e+06	3.49813e+06	1.3424e+06	2.99052e+06	4.13095e+06	756564	2.68666e+06	61528.2	2.84487e+06	1.68653e+06	1.80001e+06	2.58249e+06	2.17028e+06	2.27545e+06	64233.5	1.78311e+06	2.00858e+06	1.33564e+06	2.22332e+06	2.54077e+06	1.28539e+06
173.03246@1.566-rp	390600	984572	615162	1.11752e+06	1.29306e+06	620361	545618	536432	1.07267e+06	1.13152e+06	859815	552144	984666	1.0258e+06	1.19463e+06	647803	833308	1.03086e+06	855062	837019	919539	1.04463e+06	342390	967498	69602.1	931016	771694	834079	1.05102e+06	803634	780584	66502.3	877785	1.33121e+06	741551	1.28542e+06	969412	449001
Hexanoylglycine@7.697-rp	2.16874e+06	3.26489e+06	2.37772e+06	6.92502e+06	2.15818e+06	1.38317e+06	3.96206e+06	9.51385e+06	4.05504e+06	5.81226e+06	1.37349e+06	3.57231e+06	2.57185e+06	3.25464e+06	6.3024e+06	2.62939e+06	4.24463e+06	6.30217e+06	9.25216e+06	6.94246e+06	1.00847e+07	5.65095e+06	3.43498e+06	4.19726e+06	46471.4	5.34558e+06	4.48508e+06	4.62864e+06	4.80397e+06	4.86939e+06	4.45437e+06	78745.4	5.96697e+06	8.68982e+06	3.25642e+06	3.04827e+06	1.96072e+06	5.70947e+06
Hexanoylglycine@7.079-rp	2.02868e+06	7.30619e+06	4.07086e+06	7.01154e+06	4.89633e+06	2.18987e+06	7.34571e+06	4.65154e+06	4.67677e+06	4.006e+06	4.72743e+06	4.29703e+06	2.891e+06	8.04274e+06	5.28816e+06	7.23171e+06	4.15215e+06	4.58394e+06	6.84373e+06	6.15288e+06	6.99687e+06	8.21775e+06	3.94842e+06	6.75379e+06	54525.3	5.62357e+06	5.39629e+06	5.55643e+06	5.09425e+06	4.9658e+06	5.31642e+06	117205	4.43034e+06	7.60783e+06	2.71262e+06	2.55654e+06	4.86963e+06	6.96751e+06
Hexanoylglycine@7.386-rp	212939	726201	1.41312e+06	817050	874508	542332	1.13763e+06	766496	975783	1.03723e+06	426004	456202	555705	1.25427e+06	1.9267e+06	1.1355e+06	559138	1.2716e+06	1.48739e+06	671250	845005	1.92831e+06	809951	911819	24329.4	932622	940238	1.19005e+06	939527	816528	721664	50459.2	1.25744e+06	1.28748e+06	1.18258e+06	1.07664e+06	851379	1.03795e+06
173.88872@0.948-rp	3.73574e+07	5.66893e+07	3.8982e+07	1.05647e+08	1.04578e+08	5.94376e+07	1.17878e+08	5.94392e+07	4.60262e+07	8.15639e+07	7.23102e+07	6.79058e+07	5.19303e+07	9.51236e+07	5.65073e+07	7.18134e+07	5.76247e+07	7.00962e+07	8.83622e+07	6.31545e+07	7.26132e+07	9.08911e+07	3.46108e+07	8.80834e+07	60493.4	7.9432e+07	8.58767e+07	7.35161e+07	6.91475e+07	7.40956e+07	8.49521e+07	61004.3	9.63861e+07	1.12445e+08	8.24818e+07	8.04825e+07	5.73703e+07	7.13886e+07
Phenolsulficacid@3.539-rp	151033	137181	80924.4	197211	182861	134944	197894	244637	803005	374549	627086	492703	1.17272e+06	574068	1.42398e+06	436091	863893	726859	983877	562749	262691	1.23554e+06	512168	709286	34822.8	1.07122e+06	1.02064e+06	942603	928713	1.06052e+06	998842	31549.8	2.68051e+06	5.74776e+06	3.55755e+06	1.2458e+06	4.38104e+06	812724
cis-Aconiticacid@1.146-rp	2.10812e+07	1.63201e+07	1.31366e+07	2.74178e+07	2.895e+07	1.77815e+07	3.27372e+07	2.90045e+07	1.69794e+07	2.02003e+07	2.43472e+07	2.33769e+07	1.49736e+07	3.32726e+07	1.38101e+07	1.83445e+07	2.06158e+07	2.76046e+07	3.10948e+07	2.76796e+07	2.95093e+07	2.57541e+07	1.28759e+07	3.08426e+07	52623.3	2.74396e+07	1.8518e+07	2.30166e+07	2.35655e+07	1.90211e+07	2.34013e+07	89241	1.6887e+07	2.56246e+07	1.71737e+07	1.59121e+07	1.66367e+07	2.00533e+07
cis-Aconiticacid@1.433-rp	1.34185e+07	1.44337e+07	1.04488e+07	2.31815e+07	1.92401e+07	7.07367e+06	2.44005e+07	2.50677e+07	2.29814e+07	2.34606e+07	1.67725e+07	1.36418e+07	2.97516e+07	2.07244e+07	2.91526e+07	1.85233e+07	1.8938e+07	1.92591e+07	2.7798e+07	2.33745e+07	1.96517e+07	2.44865e+07	1.10857e+07	3.13222e+07	17584.5	2.18021e+07	2.47084e+07	19147760	1.8165e+07	1.74654e+07	1.85367e+07	13133.4	2.35303e+07	2.51308e+07	1.46205e+07	2.50951e+07	1.53625e+07	1.16278e+07
174.0639@1.056-rp	1.21963e+06	1.74039e+06	1.24054e+06	2.83336e+06	2.24354e+06	1.08744e+06	1.68526e+06	1.70348e+06	1.38044e+06	1.75547e+06	1.72053e+06	2.4605e+06	1.53858e+06	2.0103e+06	1.55367e+06	1.3099e+06	2.55632e+06	1.56613e+06	1.7748e+06	1.95699e+06	1.96589e+06	2.82674e+06	1.49048e+06	1.99364e+06	50116.2	2.29754e+06	2.10867e+06	1.77599e+06	1.87921e+06	1.95382e+06	2.21022e+06	87962.6	2.6291e+06	2.60589e+06	2.01281e+06	4.60076e+06	1.73214e+06	2.2929e+06
174.07511@1.024-rp	389311	540464	1.35233e+06	2.50913e+06	771539	457674	1.19153e+06	1.03944e+06	1.16903e+06	1.61974e+06	1.2805e+06	967242	435204	1.13843e+06	1.08356e+06	1.88025e+06	770380	1.11256e+06	943713	2.1391e+06	1.4785e+06	2.26626e+06	809917	1.12556e+06	70377.3	1.17407e+06	818724	908123	1.12007e+06	1.27274e+06	1.36141e+06	62304.1	954387	1.41186e+06	548800	1.33358e+06	851275	901151
174.07601@1.021-rp	179338	465882	205830	974210	856922	430749	398029	298998	353993	652043	256090	294282	431335	524992	488755	527661	549895	616230	383037	586575	750459	738098	313859	586722	16095.2	534115	258576	415286	260578	550570	316512	15840.2	749344	408670	412770	432223	282802	474295
N-acetylornithine@1.152-rp	2.30546e+06	2.80428e+06	2.18643e+06	3.199e+06	4.09928e+06	2.14286e+06	5.88802e+06	5.13603e+06	3.54965e+06	5.66958e+06	5.30636e+06	5.62096e+06	3.59345e+06	4.37776e+06	3.79967e+06	2.82987e+06	3.10498e+06	5.90027e+06	7.16379e+06	4.39053e+06	6.1259e+06	4.3208e+06	2.89719e+06	7.06655e+06	29228	4.51654e+06	4.71553e+06	4.01771e+06	4.38495e+06	4.41185e+06	4.64718e+06	36453.9	6.50546e+06	6.69303e+06	3.51174e+06	5.6095e+06	4.90573e+06	4.33901e+06
175.03014@1.583-rp	6.27394e+06	8.08711e+06	6.4763e+06	4.56962e+07	1.27709e+07	1.59173e+07	1.5971e+07	1.36526e+07	3.19276e+07	3.00896e+07	3.66508e+07	1.41209e+07	2.404e+07	1.31881e+07	3.28838e+07	2.02215e+07	2.26305e+07	2.38052e+07	3.26194e+07	1.47608e+07	2.90294e+07	1.88057e+07	4.57824e+06	3.4732e+07	55218.9	2.20839e+07	2.10314e+07	1.86841e+07	1.86279e+07	2.03977e+07	1.90526e+07	49269.7	1.17439e+07	1.35154e+07	1.73117e+07	1.75104e+07	9.39515e+06	8.27227e+06
N-acetylasparticacid@1.438-rp	3.26417e+06	4.98306e+06	5.6249e+06	5.38994e+06	6.74909e+06	3.84849e+06	6.64297e+06	4.83508e+06	4.37219e+06	5.40263e+06	4.46469e+06	4.17395e+06	5.36552e+06	6.06751e+06	6.14421e+06	8.0936e+06	4.33229e+06	4.47822e+06	8.17355e+06	5.87636e+06	5.42587e+06	9.07093e+06	4.51892e+06	7.17749e+06	131743	5.15774e+06	4.95464e+06	5.72455e+06	5.99224e+06	5.33137e+06	5.73787e+06	132499	6.31365e+06	5.25444e+06	6.77328e+06	5.87321e+06	5.51368e+06	4.71986e+06
Guanidinosuccinicacid@1.048-rp	1.06015e+07	1.72332e+07	2.33779e+07	3.75219e+07	2.0383e+07	1.23593e+07	2.22845e+07	1.69402e+07	1.58492e+07	2.60005e+07	1.57864e+07	3.35741e+07	1.45355e+07	2.0678e+07	1.51934e+07	2.37104e+07	2.60511e+07	2.59712e+07	3.14312e+07	2.5988e+07	3.22101e+07	2.4188e+07	1.62448e+07	3.30394e+07	76677	2.30365e+07	2.22775e+07	2.31966e+07	2.12937e+07	2.30263e+07	2.15833e+07	102692	2.63948e+07	3.68698e+07	2.31082e+07	2.68635e+07	2.04769e+07	2.47142e+07
175.06665@2.899-rp	626341	657570	377762	645388	495428	349518	1.0771e+06	956183	572419	688814	734926	672141	891489	1.21488e+06	820682	1.13821e+06	677764	876564	1.26319e+06	1.00071e+06	981431	1.16307e+06	432969	752838	39117.3	1.08098e+06	924350	807336	711538	748506	700026	32799.8	1.49749e+06	1.16428e+06	995390	1.08269e+06	841890	609475
Citrulline@1.025-rp	2.67455e+06	7.25553e+06	2.74674e+06	5.08549e+06	6.59899e+06	3.12865e+06	1.18051e+07	9.18806e+06	7.8503e+06	8.29182e+06	1.06825e+07	9.54352e+06	3.82071e+06	1.27917e+07	1.03277e+07	5.86308e+06	1.30359e+07	6.61414e+06	1.11645e+07	1.07743e+07	8.8082e+06	1.76029e+07	4.83011e+06	5.83995e+06	352620	9.01758e+06	8.50042e+06	7.40724e+06	6.5543e+06	8.40944e+06	6.06318e+06	355034	1.15069e+07	8.50477e+06	5.03095e+06	8.27503e+06	4.39384e+06	5.57926e+06
175.12064@1.165-rp	2.41039e+06	2.38104e+06	2.14683e+06	3.51774e+06	3.19886e+06	2.54831e+06	3.61884e+06	3.35113e+06	1.32753e+06	2.13531e+06	1.76059e+06	2.23612e+06	1.88693e+06	2.88929e+06	2.03237e+06	3.00419e+06	2.5971e+06	2.9133e+06	4.24378e+06	3.26365e+06	3.27656e+06	2.44051e+06	2.56326e+06	5.5698e+06	57178.1	3.12574e+06	2.71692e+06	2.34709e+06	2.62205e+06	2.64417e+06	2.65522e+06	932734	4.52386e+06	3.38194e+06	2.33689e+06	3.27867e+06	3.46968e+06	2.5589e+06
2-hydroxy-3-oxoadipicacid@1.224-rp	2.70985e+08	1.14885e+08	5.48502e+07	2.0318e+08	1.71289e+08	8.84508e+07	2.17406e+08	2.95816e+08	8.01242e+07	6.12781e+07	7.92799e+07	132361280	8.79987e+07	3.10313e+08	5.58303e+07	2.57443e+08	1.32279e+08	2.43013e+08	164469376	2.07291e+08	3.41854e+08	2.45361e+08	1.08495e+08	2.08318e+08	92440	2.25985e+08	1.90098e+08	1.5237e+08	1.33022e+08	1.22518e+08	1.23149e+08	162809	3.1437e+08	2.57234e+08	2.12676e+08	2.24207e+08	8.47231e+07	1.36556e+08
176.05694@1.577-rp	4.23809e+06	4.73952e+06	5.87329e+06	3.87352e+06	4.16244e+06	1.93653e+06	5.83582e+06	3.58567e+06	4.50667e+06	3.19407e+06	3.73934e+06	4.81189e+06	2.61056e+06	3.5348e+06	4.48614e+06	2.82301e+06	4.94581e+06	4.91039e+06	4.55017e+06	4.26175e+06	3.61142e+06	3.05852e+06	3.98122e+06	2.6783e+06	60569.9	4.17478e+06	4.99852e+06	4.3561e+06	4.05561e+06	3.92638e+06	4.31372e+06	54044.3	2.09624e+06	5.57197e+06	2.83847e+06	3.15671e+06	2.72999e+06	5.04313e+06
176.07946@1.01-rp	3.61094e+06	5.9591e+06	4.302e+06	5.65167e+06	6.44913e+06	3.21288e+06	9.67851e+06	6.67841e+06	6.63124e+06	7.36843e+06	6.61034e+06	6.24695e+06	3.83455e+06	7.97734e+06	9.34963e+06	4.53061e+06	9.53442e+06	9.605e+06	1.08719e+07	7.74113e+06	9.13011e+06	1.07405e+07	3.94595e+06	6.80056e+06	339125	7.92165e+06	6.52792e+06	6.29705e+06	6.71455e+06	6.90246e+06	6.63494e+06	369227	9.876e+06	9.0556e+06	3.83366e+06	7.12124e+06	4.80197e+06	5.35975e+06
5,6,7,8-tetrahydro-2-naphthoicacid@17.749-rp	60558.7	78079.6	108752	86358.6	316621	90411.7	68126.8	41065.9	87994.5	95885	302544	1.17473e+06	33805.2	102685	39197.6	266973	75778.9	1.95122e+06	208858	31973.6	241418	160261	61382	29558.9	21195.7	155757	163711	151726	124168	174073	167379	74025.3	61919.7	67146.8	36599.7	87472.5	114077	34792.8
177.0515@0.936-rp	4.73018e+07	3.52987e+07	4.37217e+07	5.50509e+07	4.08216e+07	3.97223e+07	5.083e+07	6.63222e+07	5.26657e+07	4.82713e+07	6.23116e+07	5.83272e+07	5.02185e+07	5.80922e+07	4.14779e+07	5.48988e+07	5.4836e+07	5.17268e+07	4.55131e+07	4.94122e+07	4.84068e+07	4.57627e+07	4.31182e+07	3.95988e+07	514783	4.90352e+07	5.43282e+07	4.56042e+07	5.19169e+07	5.06445e+07	5.61917e+07	521127	4.21349e+07	5.11348e+07	4.81988e+07	4.95129e+07	5.16338e+07	4.38398e+07
177.06494@2.112-rp	1.22406e+06	2.31489e+06	989088	2.48428e+06	1.53086e+06	1.40876e+06	1.19325e+06	2.11541e+06	2.21299e+06	2.2807e+06	2.47322e+06	1.72232e+06	2.02904e+06	3.18684e+06	3.25821e+06	2.27399e+06	2.47368e+06	3.20027e+06	2.81419e+06	2.51807e+06	2.88956e+06	2.18814e+06	1.32073e+06	2.96561e+06	20513.9	2.7301e+06	2.12522e+06	2.21068e+06	2.14928e+06	2.33372e+06	2.43455e+06	19040.9	3.58321e+06	3.52586e+06	2.78015e+06	1.46977e+06	1.66031e+06	1.27966e+06
177.06499@3.383-rp	1.67051e+06	2.77007e+06	1.84729e+06	3.19244e+06	2.89698e+06	2.4652e+06	1.7359e+06	2.98022e+06	2.04179e+06	2.18296e+06	2.12612e+06	3.1003e+06	1.70703e+06	3.80476e+06	2.49956e+06	3.21736e+06	3.14648e+06	3.71024e+06	3.29615e+06	3.21068e+06	3.31821e+06	3.30785e+06	2.0466e+06	3.29038e+06	25306.7	2.68886e+06	2.81824e+06	2.51244e+06	2.4717e+06	3.07514e+06	2.70535e+06	28503.5	3.30646e+06	4.53065e+06	1.75181e+06	3.3596e+06	2.05152e+06	2.52744e+06
177.09977@1.014-rp	1.55581e+07	1.19786e+07	1.0405e+07	2.10211e+07	2.03484e+07	1.58799e+07	2.64404e+07	1.31599e+07	1.1495e+07	1.61079e+07	2.48997e+07	1.78704e+07	7.43732e+06	1.27908e+07	9.74628e+06	9.55496e+06	1.10672e+07	1.02944e+07	1.67976e+07	1.20201e+07	1.43348e+07	1.59469e+07	7.43217e+06	1.55228e+07	73642.1	1.52223e+07	1.34387e+07	1.24076e+07	1.33119e+07	1.33324e+07	1.46126e+07	144610	1.39271e+07	1.68108e+07	8.13246e+06	1.08796e+07	9.91789e+06	1.31742e+07
Pyrophosphate@1.077-rp	2.96484e+07	3.01257e+07	2.94254e+07	2.09118e+07	3.11026e+07	3.18643e+07	3.35552e+07	1.39579e+07	2.34409e+07	2.07437e+07	2.16074e+07	21561959	2.01799e+07	2.03567e+07	1.87773e+07	1.98211e+07	2.11079e+07	1.69725e+07	2.42333e+07	1.87232e+07	2.27333e+07	1.89152e+07	2.3711e+07	1.9397e+07	37471.4	2.32499e+07	2.21571e+07	2.1667e+07	2.08716e+07	2.15871e+07	2.0172e+07	37200.2	2.84833e+07	2.68615e+07	1.90519e+07	1.4876e+07	1.48035e+07	2.97633e+07
177.98849@0.81-rp	353794	723606	870624	788616	1.0457e+06	731903	480929	918415	738887	835367	759942	822606	397961	885393	638211	648092	831491	713013	587148	824870	909342	1.05117e+06	653903	887511	28719.2	484683	765313	850082	796428	827601	761282	27909.4	418731	862958	395665	779383	998350	842719
178.03266@0.821-rp	2.57245e+07	3.01743e+07	3.16383e+07	2.89672e+07	3.38935e+07	2.77694e+07	3.73418e+07	3.28608e+07	2.66199e+07	2.83235e+07	3.02841e+07	3.14649e+07	2.70278e+07	3.13207e+07	2.3805e+07	2.55505e+07	3.25269e+07	3.34956e+07	4.10355e+07	3.45298e+07	3.10648e+07	3.72694e+07	3.12499e+07	2.94209e+07	1.30567e+06	3.57066e+07	3.04045e+07	3.20669e+07	3.43241e+07	2.99166e+07	3.15048e+07	1.29673e+06	2.82583e+07	3.37268e+07	1.13927e+07	2.86324e+07	3.31655e+07	3.03649e+07
Cysteinylglycine@1.253-rp	1.40909e+08	1.60899e+08	1.38294e+08	1.71217e+08	1.45893e+08	1.35118e+08	2.98964e+08	2.38245e+08	1.82336e+08	2.27668e+08	2.41539e+08	2.47176e+08	2.13693e+08	2.21634e+08	1.88881e+08	2.24478e+08	1.67671e+08	2.09066e+08	2.32114e+08	2.11649e+08	2.51117e+08	2.45379e+08	1.26465e+08	1.8269e+08	171686	2.21535e+08	2.27345e+08	2.03738e+08	2.19888e+08	2.04844e+08	2.07768e+08	193149	240911149	216663632	2.03316e+08	2.78974e+08	1.9669e+08	2.18711e+08
Cysteinylglycine@2.55-rp	351783	439096	501149	536864	291180	289169	1.04225e+06	488611	416048	470054	488678	429887	480377	576443	567541	762748	573769	608561	727400	686680	651363	986634	429683	622608	33513.3	581352	619475	480675	555975	647825	466000	34968.7	537463	390151	433286	476240	474307	450757
1-keto-inositol@1.023-rp	4.07184e+07	5.47148e+07	4.6122e+07	7.11828e+07	6.79277e+07	5.35281e+07	5.90413e+07	5.16537e+07	5.59963e+07	5.93346e+07	5.38838e+07	5.30598e+07	4.62218e+07	6.41651e+07	5.80467e+07	6.12739e+07	5.45977e+07	5.89026e+07	6.74948e+07	5.77674e+07	6.08185e+07	7.04988e+07	4.20772e+07	6.84367e+07	910408	5.96392e+07	6.04883e+07	5.36056e+07	5.74525e+07	5.99421e+07	6.32411e+07	1.06652e+06	4.954e+07	6.1932e+07	5.01179e+07	5.23042e+07	5.11456e+07	4.69368e+07
1,2-dihydroxy-3,4-epoxytetrahydronaphthalene@6.192-rp	217571	312546	395448	537832	249300	163620	199118	446984	390024	392021	333564	384795	407029	379448	307117	394838	375357	329899	505175	530649	500381	627100	280210	421245	28607.2	389430	387543	403041	540313	400886	378296	75217.9	225024	380670	319630	277424	453077	311265
S-carboxymethylcysteine@1.517-rp	2.11649e+06	2.09055e+06	4.73441e+06	4.95942e+06	3.23011e+06	1.65013e+06	6.40405e+06	6.89169e+06	6.01022e+06	7.00956e+06	6.11695e+06	9.29971e+06	8.58814e+06	1.01432e+07	1.01425e+07	9.81222e+06	1.41024e+07	1.38225e+07	1.20034e+07	6.55524e+06	9.18865e+06	1.69409e+07	5.42775e+06	1.66749e+07	33221.5	5.77082e+06	7.14658e+06	8.53335e+06	1.02719e+07	1.06275e+07	1.12091e+07	42626.3	3.78684e+06	4.63225e+06	4.05912e+06	9.64207e+06	8.57972e+06	5.41931e+06
Isoxanthopterin@3.162-rp	478601	1.19603e+06	1.38303e+06	1.63601e+06	1.71264e+06	1.40191e+06	754588	1.22378e+06	1.37084e+06	2.07848e+06	1.51129e+06	1.73526e+06	1.29049e+06	1.06935e+06	2.29884e+06	1.46128e+06	2.05534e+06	2.08495e+06	1.8851e+06	1.51726e+06	1.56523e+06	1.55712e+06	1.47258e+06	2.33084e+06	53313	1.13359e+06	1.5916e+06	1.65103e+06	1.82754e+06	2.02357e+06	1.97446e+06	51790.8	1.37279e+06	1.73576e+06	1.08854e+06	1.85753e+06	2.36122e+06	1.45649e+06
3-succinoylpyridine@5.963-rp	2.6764e+06	1.98408e+06	1.16346e+06	3.02836e+06	1.55976e+06	1.17996e+06	1.40882e+06	3.52859e+06	2.00117e+06	6.16766e+06	3.66328e+06	3.24868e+06	2.99688e+06	1.08225e+06	5.16143e+06	1.02187e+06	3.23142e+06	4.99914e+06	7.64683e+06	2.89435e+06	3.89536e+06	5.21245e+06	3.23745e+06	4.1407e+06	65632.3	5.86435e+06	5.63838e+06	5.52424e+06	5.39888e+06	5.38745e+06	4.97805e+06	61118.5	1.96822e+07	1.56902e+07	1.45494e+07	9.2924e+06	1.42179e+07	1.0095e+07
7-aminomethyl-7-carbaguanine@5.635-rp	1.1066e+06	2.14254e+06	1.18516e+06	3.26318e+06	2.37644e+06	6.55966e+06	1.15593e+06	808898	3.3496e+06	3.22429e+06	4.48065e+06	1.65115e+06	2.08235e+06	1.33686e+06	2.19108e+06	2.06298e+06	2.20599e+06	2.28363e+06	1.42755e+06	2.01331e+06	1.59755e+06	1.7206e+06	2.06444e+06	2.61298e+06	28883.6	1.72456e+06	2.35166e+06	2.29662e+06	2.75588e+06	2.73675e+06	3.06805e+06	24847.4	2.28415e+06	1.37203e+06	7.46546e+06	2.95259e+06	3.3866e+06	632067
179.89669@0.938-rp	4.04058e+07	4.78527e+07	3.1004e+07	3.1047e+07	2.02285e+07	4.87027e+07	3.10033e+07	4.25361e+07	1.61316e+07	3.21177e+07	4.10847e+07	2.05284e+07	2.94821e+07	3.40929e+07	1.54915e+07	2.36185e+07	2.14752e+07	3.65547e+07	1.87053e+07	1.9091e+07	2.62761e+07	1.98034e+07	3.47113e+07	2.53427e+07	98756.3	3.2097e+07	3.11001e+07	2.8298e+07	2.90513e+07	2.8201e+07	3.23974e+07	80742.1	1.87418e+07	2.84504e+07	2.32212e+07	2.23622e+07	3.13954e+07	2.8936e+07
179.95811@0.808-rp	309594	373367	453065	400011	460008	314982	431371	395042	361714	413713	363912	401100	277901	421572	326621	318620	406267	337794	474996	447771	499060	489469	362194	459509	24667.2	391871	431691	406619	370974	374274	373300	29598.6	349682	421925	200739	357344	423466	385871
179.97091@0.926-rp	1.19522e+06	1.88789e+06	1.57565e+06	1.70834e+06	1.64474e+06	871678	1.86567e+06	1.60308e+06	1.70001e+06	2.241e+06	1.85084e+06	1.99352e+06	1.93735e+06	2.24221e+06	1.83152e+06	1.5038e+06	1.65823e+06	2.76161e+06	1.9009e+06	1.49142e+06	1.8186e+06	1.65156e+06	1.29014e+06	2.2169e+06	304912	1.57605e+06	2.04665e+06	1.79404e+06	1.92173e+06	1.69873e+06	2.01277e+06	241371	2.16408e+06	3.16012e+06	3.29258e+06	1.96717e+06	2.0203e+06	2.28501e+06
179.98022@0.936-rp	6.96054e+07	7.29707e+07	6.13637e+07	5.63118e+07	4.78947e+07	6.18208e+07	6.10685e+07	7.45608e+07	5.4898e+07	6.0218e+07	6.46763e+07	4.57914e+07	4.18824e+07	4.6348e+07	3.56014e+07	5.84224e+07	5.01613e+07	7.27963e+07	4.80183e+07	4.99243e+07	5.63538e+07	4.17052e+07	7.36912e+07	4.53569e+07	1.18742e+06	5.87417e+07	6.84128e+07	5.88797e+07	6.47804e+07	6.24967e+07	5.95678e+07	885827	3.99983e+07	6.29226e+07	4.43626e+07	5.48052e+07	4.30626e+07	6.5473e+07
179.98025@0.978-rp	4.75084e+07	4.78089e+07	4.12133e+07	2.83619e+07	1.50685e+07	3.45266e+07	2.67419e+07	5.37917e+07	2.53397e+07	3.17963e+07	3.93407e+07	1.44172e+07	3.96551e+07	4.1561e+07	2.03095e+07	3.2131e+07	2.35137e+07	4.44658e+07	1.88419e+07	2.20271e+07	30228293	2.5479e+07	4.31859e+07	1.7203e+07	114955	3.21247e+07	3.58535e+07	3.25136e+07	3.82601e+07	3.44417e+07	3.38609e+07	86229.3	2.14825e+07	3.06907e+07	2.85088e+07	2.63852e+07	3.93608e+07	3.48021e+07
180.03023@0.832-rp	1.05129e+07	1.15066e+07	1.24854e+07	1.08016e+07	1.39396e+07	1.08306e+07	1.37817e+07	1.2487e+07	9.22063e+06	1.15114e+07	1.33597e+07	1.33824e+07	9.81705e+06	1.385e+07	8.27753e+06	9.76231e+06	1.36432e+07	1.26097e+07	1.63441e+07	1.30112e+07	1.18116e+07	1.68892e+07	1.16438e+07	1.299e+07	758267	1.27266e+07	1.27837e+07	1.17623e+07	1.35597e+07	1.26184e+07	1.32214e+07	756589	9.45969e+06	1.27658e+07	2.72473e+06	1.17521e+07	1.33444e+07	1.27371e+07
9-fluorenone@12.862-rp	89310.8	478480	655348	1.05621e+06	376912	394401	153125	470146	529564	480311	146953	362508	408849	857350	1.43806e+06	332363	821732	420429	279739	776021	1.13876e+06	840110	189852	401399	65302.8	586949	541782	520382	572757	510061	554496	66736.5	428332	684388	67774.1	1.2877e+06	500495	433920
Allose@1.019-rp	1640788731	2305996624	1654412622	2176903085	2129001796	2075199979	2213335725	1957507997	1752723696	1998416177	1846207647	1557064806	1756358170	2184559282	1881524016	2027896616	1627718273	2082462985	1900764078	1600390072	1639677212	2064534024	1643385278	1959801624	859497	1912940331	1915595624	1905353714	1831998743	1819887073	2231173346	3.57231e+06	1584000038	1876518933	1600801429	1621845693	1930401768	1517360630
Coniferylalcohol@12.707-rp	329451	99005.8	196434	381136	906308	143136	168499	109137	123319	97921.9	230472	455261	362510	115053	327251	117033	239863	482299	242759	167645	111150	144721	300088	120958	85702.3	114395	136831	177075	94324.4	99203	98754.4	122792	117649	189428	188252	166366	459821	362250
180.11502@12.862-rp	3.74287e+07	5.29212e+07	3.45014e+07	5.37517e+07	6.90345e+07	6.24985e+07	4.28103e+07	4.85797e+07	4.2469e+07	4.5208e+07	4.65342e+07	4.80546e+07	3.91207e+07	4.02819e+07	4.77719e+07	3.15471e+07	5.79253e+07	4.50898e+07	4.30762e+07	4.97568e+07	5.20209e+07	5.07983e+07	4.57739e+07	5.45421e+07	255215	4.43164e+07	4.71897e+07	4.42215e+07	4.94982e+07	4.85011e+07	6.18035e+07	8.53106e+06	4.73748e+07	4.71095e+07	3.25161e+07	5.11925e+07	4.45469e+07	4.01519e+07
180.11517@12.133-rp	47328.2	197319	214050	208570	280771	255007	272769	558735	286083	367620	316022	252607	506315	786619	328495	614710	518642	452042	272576	359992	451327	550007	375146	357166	20993	316724	401048	531181	408272	511402	529332	32971.5	82692.3	156012	458073	386396	223974	306949
181.05997@2.132-rp	1.17268e+07	7.9138e+06	5.0366e+06	1.33065e+07	9.02502e+06	7.649e+06	7.51788e+06	1.54991e+07	7.00099e+06	6.88969e+06	6.61024e+06	7.61595e+06	5.75563e+06	1.23074e+07	6.77035e+06	1.01374e+07	7.50147e+06	1.19467e+07	1.29255e+07	1.1291e+07	1.61372e+07	8.29063e+06	7.062e+06	1.10071e+07	159926	1.29676e+07	1.12573e+07	1.01842e+07	9.541e+06	8.48966e+06	7.57271e+06	139424	1.91239e+07	1.45254e+07	1.12863e+07	1.37509e+07	6.43916e+06	5.65035e+06
Beta-tyrosine@1.903-rp	1.77522e+06	2.85373e+06	2.22125e+06	3.91901e+06	3.5501e+06	2.55341e+06	2.84458e+06	2.99629e+06	2.97777e+06	3.86699e+06	3.52018e+06	2.66788e+06	2.85167e+06	4.11994e+06	3.87638e+06	3.6458e+06	2.77279e+06	3.31772e+06	4.2412e+06	3.41073e+06	3.84308e+06	3.76663e+06	2.23107e+06	4.09017e+06	54227.8	3.8431e+06	3.02308e+06	3.78989e+06	3.34889e+06	3.50256e+06	2.91778e+06	60371.7	4.63267e+06	3.93361e+06	3.45466e+06	3.59487e+06	3.40382e+06	2.25304e+06
Beta-tyrosine@1.464-rp	7.19397e+07	9.45169e+07	6.12885e+07	1.08512e+08	9.99798e+07	8.94148e+07	6.46981e+07	8.55805e+07	9.13337e+07	8.28476e+07	1.0282e+08	6.34438e+07	8.20539e+07	8.34083e+07	1.05548e+08	8.0442e+07	8.13014e+07	8.9624e+07	1.0654e+08	1.09534e+08	1.06162e+08	7.37016e+07	6.86013e+07	1.00037e+08	566615	9.94945e+07	9.18582e+07	8.97621e+07	8.98835e+07	8.83978e+07	8.41697e+07	571710	1.12347e+08	8.87175e+07	9.61524e+07	9.14342e+07	6.78972e+07	5.65709e+07
181.11849@12.968-rp	3.36523e+06	4.65985e+06	3.26213e+06	5.1501e+06	7.10204e+06	5.42486e+06	3.92193e+06	4.96945e+06	4.37447e+06	4.39387e+06	4.48586e+06	4.35589e+06	3.78324e+06	4.00423e+06	4.93113e+06	2.93969e+06	5.03617e+06	4.35686e+06	4.20768e+06	4.93697e+06	4.87811e+06	4.8524e+06	4.39595e+06	5.31321e+06	51821.9	4.60912e+06	4.69242e+06	4.25898e+06	5.32785e+06	4.60142e+06	5.28348e+06	684476	4.38527e+06	4.12785e+06	3.10356e+06	1.20972e+06	4.41541e+06	3.60396e+06
181.12295@14.114-rp	189646	561434	574858	499933	715855	623314	1.09817e+06	743202	600197	722610	626769	760685	920543	690859	799970	878750	895385	923822	968541	689622	706230	1.10308e+06	614987	981968	22412.6	779237	790917	723238	977593	1.01869e+06	985775	117310	212431	554431	348409	974536	622155	713586
182.0041@0.887-rp	4.65894e+06	4.65489e+06	4.27178e+06	2.68632e+06	3.34899e+06	4.28905e+06	3.45807e+06	4.23039e+06	2.29177e+06	3.03135e+06	3.99907e+06	3.398e+06	3.39126e+06	4.47383e+06	1.77735e+06	2.74265e+06	4.28907e+06	4.27429e+06	3.34097e+06	2.86261e+06	3.16246e+06	4.20513e+06	4.37584e+06	2.63455e+06	260765	4.01817e+06	3.64462e+06	3.3963e+06	4.04855e+06	4.18144e+06	4.16309e+06	202750	1.91051e+06	3.09614e+06	493292	3.0137e+06	4.64084e+06	3.05827e+06
182.05404@0.834-rp	5.11424e+07	5.07843e+07	6.03518e+07	5.06704e+07	6.43885e+07	5.04328e+07	6.4286e+07	5.70859e+07	4.05885e+07	5.55693e+07	5.99818e+07	6.08144e+07	4.87329e+07	6.65562e+07	3.72577e+07	4.81224e+07	6.38898e+07	5.80404e+07	7.48203e+07	5.99672e+07	5.39662e+07	7.97073e+07	5.54305e+07	5.84034e+07	2.30972e+06	5.64218e+07	6.04632e+07	5.67963e+07	6.18837e+07	5.83752e+07	6.03487e+07	2.33321e+06	4.47984e+07	6.05437e+07	1.40054e+07	5.34477e+07	6.38748e+07	6.44361e+07
3,4-dimethoxybenzoicacid@4.368-rp	5.60571e+06	8.70574e+06	5.78736e+06	1.15706e+07	9.18852e+06	6.99309e+06	16272056	9.25004e+06	8.34461e+06	9.26308e+06	1.00382e+07	8.01831e+06	4.98099e+06	1.0052e+07	8.08544e+06	9.02805e+06	8.08923e+06	1.26582e+07	1.75537e+07	1.26034e+07	1.59614e+07	1.2189e+07	5.39125e+06	1.59254e+07	27505.4	1.01777e+07	9.90398e+06	9.91587e+06	1.02219e+07	9.3966e+06	1.00321e+07	84504.2	1.08001e+07	12300136	5.4623e+06	5.46341e+06	4.64499e+06	1.09845e+07
Galactitol@1.028-rp	3.76386e+06	1.11257e+07	3.0523e+06	1.69634e+07	1.94724e+07	2.04664e+07	2.94753e+06	1.12686e+07	7.55187e+06	1.52936e+07	8.94448e+06	8.8456e+06	7.36756e+06	4.60686e+06	1.18212e+07	16073116	1.33784e+07	7.43402e+06	1.55544e+07	1.38806e+07	7.04644e+06	1.25769e+07	7.69323e+06	1.44253e+07	841646	1.38046e+07	1.14776e+07	1.30486e+07	1.13066e+07	1.22202e+07	9.72389e+06	861641	1.8728e+07	7.27266e+06	1.73819e+07	1.37657e+07	2.0526e+07	3.12781e+06
Galactitol@1.028-rp_879	800264	1.87225e+06	901458	3.11645e+06	3.43509e+06	2.85745e+06	1.149e+06	2.06884e+06	1.55871e+06	2.46083e+06	1.49967e+06	1.77576e+06	1.5363e+06	1.19551e+06	2.09403e+06	3.16775e+06	2.27976e+06	1.82088e+06	3.19507e+06	2.44483e+06	1.79171e+06	2.80331e+06	1.33337e+06	2.71823e+06	634636	2.32525e+06	2.24784e+06	2.22396e+06	2.24407e+06	2.18566e+06	2.46855e+06	659342	4.11269e+06	2.20545e+06	3.08399e+06	2.70039e+06	2.55498e+06	1.23457e+06
Iridotrial@7.337-rp	172911	458891	447508	357869	618511	554968	602033	1.21429e+06	567871	663823	668437	563578	1.46488e+06	2.42866e+06	919571	953587	1.09266e+06	1.08439e+06	577624	724152	976030	1.16024e+06	1.08605e+06	918823	73189.4	777013	967303	1.02763e+06	1.16369e+06	1.06288e+06	1.17006e+06	194314	181528	304359	375930	634707	592918	526754
182.97347@0.972-rp	3.14219e+07	3.18066e+07	2.29584e+07	1.41961e+07	8.47373e+06	1.47974e+07	1.3387e+07	4.61637e+07	1.33542e+07	1.63609e+07	2.26723e+07	12320362	2.92408e+07	2.97784e+07	1.08496e+07	1.77288e+07	1.30482e+07	2.79336e+07	1.2252e+07	9.95603e+06	1.6757e+07	1.4438e+07	3.01487e+07	1.53846e+07	7943.62	1.87204e+07	2.04799e+07	1.93247e+07	2.05017e+07	1.95564e+07	2.08516e+07	33530	7.33255e+06	1.55651e+07	1.37156e+07	1.38433e+07	2.92279e+07	1.67512e+07
p-hydroxyphenylacetothiohydroximicacid@1.469-rp	688759	2.12113e+06	2.46232e+06	2.4453e+06	2.05757e+06	2.56678e+06	2.53237e+06	1.79461e+06	1.94928e+06	2.94983e+06	3.29704e+06	3.68429e+06	2.21386e+06	2.27149e+06	3.59621e+06	2.34771e+06	4.77169e+06	2.9262e+06	2.79078e+06	1.95419e+06	1.91544e+06	2.64965e+06	2.89321e+06	3.56911e+06	29920.2	2.19925e+06	2.39683e+06	2.62989e+06	2.89635e+06	3.54582e+06	3.44635e+06	27513.4	1.06353e+06	1.52155e+06	952422	2.57434e+06	1.90893e+06	2.97613e+06
183.03807@0.831-rp	1.13309e+08	1.08742e+08	129516122	1.0167e+08	1.47995e+08	1.10302e+08	140375419	1.31568e+08	9.36288e+07	1.1936e+08	1.33918e+08	1.41983e+08	1.07152e+08	1.44662e+08	7.89353e+07	1.04737e+08	1.43506e+08	127324852	1.78559e+08	138152607	1.28624e+08	1.76937e+08	1.18971e+08	1.26831e+08	7.80822e+06	1.25979e+08	1.39471e+08	1.2574e+08	1.38967e+08	1.32751e+08	1.41625e+08	9.03163e+06	9.83477e+07	1.25774e+08	2.88482e+07	1.13997e+08	1.41921e+08	1.46595e+08
3,5-dihydroxyphenylglycine@1.709-rp	458281	491940	434162	719557	644871	562755	344434	464388	621324	649773	524436	436734	491950	488523	613536	572789	460130	520764	602900	552425	541294	478901	316831	533773	14647	538267	483283	507432	570553	559337	455010	31107.9	528699	353224	598341	552199	457341	166101
Cholinephosphate@1.013-rp	2.22596e+08	2.87584e+08	213852925	5.03882e+08	308679263	1.00405e+08	8.25453e+08	4.1638e+08	4.04706e+08	3.62429e+08	5.2566e+08	5.72484e+08	2.85982e+08	2.9995e+08	2.39619e+08	3.84177e+08	4.72677e+08	4.1971e+08	4.91461e+08	5.45286e+08	540713918	3.9002e+08	1.69684e+08	3.52245e+08	96408.5	3.95099e+08	3.46853e+08	3.3424e+08	3.53033e+08	3.28956e+08	3.91413e+08	949145	1.73867e+08	4.42229e+08	2.52361e+08	3.23601e+08	1.23193e+08	3.76168e+08
Adrenaline@3.012-rp	675491	760420	682884	1.19299e+06	913313	736330	1.01565e+06	869447	714975	930591	833085	687971	825334	1.17472e+06	799547	899659	771016	937086	970995	721238	909582	814469	565026	1.20968e+06	27372.7	1.08345e+06	821748	890446	949118	858908	908059	24825.3	1.0646e+06	868389	953102	1.18765e+06	901046	516589
183.54733@3.384-rp	6.44238e+07	1.02702e+08	7.01769e+07	1.2256e+08	1.02898e+08	8.54825e+07	6.30361e+07	1.15561e+08	7.56376e+07	7.84434e+07	8.17166e+07	1.12779e+08	6.293e+07	1.44722e+08	1.03296e+08	1.06874e+08	1.28696e+08	1.31427e+08	1.4626e+08	1.30438e+08	1.31733e+08	1.24397e+08	7.32738e+07	1.40611e+08	51538.2	1.05556e+08	1.11938e+08	9.88646e+07	1.05252e+08	1.10359e+08	1.05924e+08	58048.7	1.1311e+08	186387969	5.87033e+07	1.3655e+08	7.23513e+07	1.01674e+08
5-hydroxyisourate@2.391-rp	509188	423139	398060	1.23605e+06	998602	1.10721e+06	457926	609332	992340	879215	991546	633966	878706	675538	756842	626745	769372	1.13877e+06	966573	770743	771474	818495	412139	926067	23840.3	805433	873547	744957	894498	738008	651764	22305.4	1.3221e+06	829432	1.02406e+06	1.12292e+06	708020	286043
5-hydroxyisourate@1.764-rp	9.22697e+06	1.11519e+07	1.673e+07	1.19717e+07	1.66254e+07	1.14404e+07	2.27425e+07	6.0497e+06	5.5907e+06	1.17413e+07	1.24803e+07	7.11188e+06	7.79979e+06	2.39533e+07	8.52303e+06	2.32386e+07	1.34525e+07	1.71725e+07	1.20957e+07	7.9804e+06	1.15644e+07	2.12316e+07	1.31011e+07	1.41302e+07	72060.3	1.16295e+07	1.30304e+07	1.34119e+07	1.39844e+07	1.29456e+07	1.27268e+07	97721.9	7.31115e+06	1.02572e+07	8.14843e+06	8.2353e+06	1.57979e+07	1.04211e+07
184.06138@0.93-rp	2.99829e+06	4.25587e+06	3.41441e+06	9.82361e+06	1.48205e+07	3.02781e+06	1.11381e+07	5.53018e+06	8.46594e+06	9.42819e+06	6.50713e+06	1.13481e+07	6.70283e+06	1.28148e+07	1.07776e+07	1.27652e+07	1.21533e+07	1.02662e+07	1.40275e+07	1.49569e+07	9.70794e+06	1.47805e+07	3.2089e+06	1.13092e+07	82399	7.75742e+06	1.00365e+07	8.66341e+06	9.38351e+06	8.52668e+06	8.82758e+06	71826.4	1.64452e+07	1.27727e+07	1.01905e+07	1.14503e+07	8.11541e+06	6.65968e+06
184.08476@2.057-rp	992843	1.8891e+06	1.27536e+06	1.89591e+06	1.88037e+06	1.04272e+06	2.69716e+06	1.88495e+06	1.5243e+06	2.41322e+06	2.4542e+06	2.54511e+06	1.95744e+06	2.26545e+06	1.89078e+06	1.86863e+06	2.22807e+06	2.47107e+06	3.08948e+06	2.82616e+06	2.83678e+06	2.48314e+06	1.51331e+06	2.83811e+06	30790	2.19573e+06	1.89625e+06	2.09728e+06	2.22293e+06	1.99986e+06	2.13428e+06	94213.2	2.00206e+06	2.23088e+06	1.14099e+06	2.00005e+06	1.53208e+06	1.76118e+06
184.09239@9.693-rp	14467.5	25272.8	21974.1	22623.6	28440.4	25319.2	79174.5	21742.5	247127	62724.9	106776	23104.1	514644	605172	412953	732539	387147	763742	102013	173605	53356	816893	35918.8	21367.8	14486.7	201368	175700	133657	183920	182059	159563	21552.6	16144.9	28408.3	17974.4	23495.9	25313.1	22413.1
184.14638@12.583-rp	160819	51446.7	294975	66936.7	71276.7	50257.8	43269.3	29530.2	61817.9	51231	31758	94074.6	45342.9	39554	25314.1	29000.5	114540	68724.6	332834	20051.7	52933	38744.5	192735	1.29663e+06	42019.1	115558	102285	87550.3	88181	129438	98789.7	45441.8	131670	324867	281657	95488.1	70092.7	49015.8
184.14647@15.781-rp	191262	469264	239131	495355	422906	124030	877511	250723	513560	1.04908e+06	345714	443131	722941	448476	525886	1.05851e+06	399484	354289	404805	308475	296108	459546	376788	409208	32761.5	607828	524503	401139	487429	463292	339094	43004.9	592449	301618	789406	970881	437433	639861
184.98275@0.953-rp	1.87183e+06	2.1368e+06	1.22992e+06	1.48378e+06	1.21431e+06	1.96039e+06	1.56864e+06	1.51291e+06	1.33168e+06	1.7104e+06	1.92222e+06	1.26924e+06	2.14623e+06	1.85781e+06	1.34681e+06	1.40636e+06	1.3944e+06	1.29485e+06	842466	1.47943e+06	1.01132e+06	1.99102e+06	1.88922e+06	845387	58677.7	1.43556e+06	1.68663e+06	1.40524e+06	1.72354e+06	1.76509e+06	1.63726e+06	54885.5	972979	1.21238e+06	1.35315e+06	1.05143e+06	1.27737e+06	1.68761e+06
185.04686@1.074-rp	3.15316e+06	2.57135e+06	3.3498e+06	3.85674e+06	3.84205e+06	2.23481e+06	8.16016e+06	5.82972e+06	3.79306e+06	5.03908e+06	5.4925e+06	7.68243e+06	4.34733e+06	6.248e+06	4.08517e+06	5.69635e+06	5.11528e+06	5.19808e+06	6.47453e+06	5.1835e+06	6.33781e+06	7.87013e+06	3.35256e+06	6.71937e+06	38985.3	5.35339e+06	5.36553e+06	4.97437e+06	5.03077e+06	5.27324e+06	5.03244e+06	39597.1	5.75008e+06	6.90377e+06	3.80719e+06	5.61439e+06	4.9094e+06	6.0669e+06
185.06873@1.569-rp	432837	451480	507928	647176	641771	301958	667416	556365	387466	871082	1.01663e+06	378669	636083	1.02475e+06	1.93166e+06	635534	1.20889e+06	2.17606e+06	646594	571884	459876	1.18399e+06	409912	480233	35244.2	477283	803576	516030	585809	727101	628063	185602	930947	566111	633522	490633	551664	531084
185.06878@1.087-rp	4.12881e+06	4.18417e+06	3.71568e+06	7.52675e+06	7.45386e+06	5.19538e+06	7.70485e+06	5.86123e+06	5.01129e+06	6.54061e+06	6.91598e+06	3.82845e+06	5.01641e+06	5.93257e+06	3.99831e+06	5.80477e+06	4.44189e+06	4.61118e+06	7.30227e+06	6.93802e+06	4.96503e+06	5.5991e+06	3.87306e+06	5.1783e+06	76616.2	4.52209e+06	4.15181e+06	5.39589e+06	5.66051e+06	4.81036e+06	4.51918e+06	383207	5.51067e+06	3.83626e+06	5.04552e+06	5.08204e+06	5.85623e+06	3.36348e+06
185.09847@1.219-rp	1.09149e+08	1.1156e+08	1.17322e+08	1.84042e+08	1.56222e+08	1.14413e+08	1.57174e+08	1.69109e+08	1.05386e+08	1.60949e+08	116445880	1.61336e+08	121061883	1.62395e+08	1.42337e+08	1.65162e+08	1.705e+08	1.7664e+08	1.72411e+08	134355738	2.20036e+08	1.54768e+08	1.05461e+08	1.95919e+08	29483.3	1.46287e+08	1.52944e+08	1.47956e+08	1.46912e+08	1.42446e+08	1.5127e+08	58285	1.8557e+08	1.75793e+08	1.14128e+08	2.03009e+08	1.41883e+08	1.28015e+08
185.98803@0.918-rp	1.58519e+08	1.28647e+08	9.66411e+07	3.69505e+07	1.9215e+07	1.1657e+08	3.37751e+07	1.07151e+08	3.54344e+07	4.54635e+07	8.22879e+07	3.01072e+07	7.73157e+07	5.33898e+07	2.7462e+07	3.95279e+07	4.3198e+07	6.57522e+07	1.93265e+07	2.72948e+07	3.17916e+07	2.34948e+07	1.48528e+08	2.69679e+07	6.39881e+06	6.01386e+07	5.26472e+07	4.73167e+07	5.31226e+07	5.49605e+07	5.21937e+07	6.91197e+06	1.66926e+07	3.19926e+07	3.23071e+07	2.8149e+07	7.50304e+07	5.42612e+07
2-phosphoglycericacid@1.113-rp	1.11161e+07	9.69609e+06	9.64456e+06	4.5983e+06	5.56125e+06	4.62601e+06	7.38772e+06	6.4857e+06	6.64069e+06	5.22752e+06	5.83382e+06	3.83119e+06	6.76347e+06	7.17301e+06	1.00632e+07	3.8306e+06	6.23853e+06	1.57249e+07	8.53832e+06	5.5884e+06	7.79311e+06	6.04217e+06	4.93276e+06	5.96752e+06	98782.6	6.6201e+06	6.08603e+06	5.97595e+06	6.41888e+06	6.80445e+06	6.81501e+06	99008.2	4.411e+06	8.30285e+06	4.40803e+06	5.52687e+06	3.53845e+06	5.43252e+06
186.02945@1.064-rp	1.37014e+08	1.59707e+08	1.1908e+08	2.42751e+08	2.30053e+08	1.62568e+08	2.92446e+08	1.60432e+08	1.5784e+08	2.03323e+08	1.91118e+08	2.409e+08	1.1813e+08	1.38557e+08	1.22413e+08	1.39534e+08	1.18611e+08	1.10344e+08	186655027	1.89642e+08	1.63498e+08	1.38629e+08	8.03971e+07	2.23388e+08	105264	1.81443e+08	1.84257e+08	1.75506e+08	1.74874e+08	1.67376e+08	1.78465e+08	219015	2.34615e+08	2.15106e+08	2.66161e+08	2.45156e+08	1.94181e+08	1.65781e+08
186.06383@1.015-rp	750616	700682	577990	987395	1.06231e+06	998931	790307	848876	711593	1.07456e+06	829247	690260	709037	1.52566e+06	1.16146e+06	685474	873076	1.85058e+06	2.08438e+06	1.11313e+06	1.61287e+06	1.50857e+06	713567	980930	37752.6	934253	1.04642e+06	821851	683778	1.27677e+06	808192	37154.4	1.72003e+06	949735	976019	1.14234e+06	816165	897343
186.0715@8.349-rp	4.11274e+06	5.33024e+06	1.69473e+06	3.49083e+06	3.83223e+06	1.96422e+06	1.08012e+07	1.52698e+07	5.58624e+06	7.60928e+06	1.06898e+07	5.37676e+06	7.68905e+06	2.0671e+07	6.58764e+06	1.60964e+07	7.51354e+06	1.19833e+07	8.98363e+06	1.30499e+07	1.51066e+07	1.62754e+07	5.34394e+06	7.65518e+06	35272.1	1.50395e+07	1.55043e+07	1.45564e+07	1.40518e+07	1.38897e+07	1.29274e+07	37267.5	16060439	7.42753e+06	5.9573e+06	9.32763e+06	5.38351e+06	4.97548e+06
2-carboxycyclohexylaceticacid@4.974-rp	97198.7	166240	161046	155058	36696.4	168602	383463	433131	110417	561604	1.02976e+06	272377	110053	185765	170266	43790.6	30702.6	27828.3	1.04354e+06	976367	353120	180568	1.03001e+06	700034	51301.1	432933	279508	402315	325809	333420	363032	156580	844239	1.13766e+06	228947	161333	554300	460387
186.10022@1.086-rp	498878	534012	421764	470164	755960	422318	906605	625135	1.17371e+06	1.04326e+06	731121	561808	381793	931822	1.18047e+06	546216	526505	1.13696e+06	1.87011e+06	824656	1.21851e+06	968133	542152	2.18458e+06	40754.1	800486	829015	556141	671700	657260	792015	39811.7	1.00094e+06	874082	504818	632968	514837	388912
6-hydroxy-5-isopropenyl-2-methylhexanoicacid@9.438-rp	700183	420881	833530	703660	838694	525548	1.19201e+06	1.02919e+06	536204	1.05258e+06	757297	1.44751e+06	789207	5.08876e+06	966875	938648	1.09685e+06	946291	1.0757e+06	1.01136e+06	480751	1.82739e+06	1.98177e+06	1.16922e+06	218586	671410	748765	870641	1.05937e+06	1.25982e+06	1.30379e+06	541609	1.23068e+06	747140	999120	1.30826e+06	948582	1.06128e+06
2-acetamidomethylenesuccinicacid@1.037-rp	3.06664e+06	4.2442e+06	4.09984e+06	8.18831e+06	8.64572e+06	6.23024e+06	9.81127e+06	3.34147e+06	3.40402e+06	6.05951e+06	3.23756e+06	4.02927e+06	2.79054e+06	3.66892e+06	2.97118e+06	4.70805e+06	4.40554e+06	3.97382e+06	5.01232e+06	4.35084e+06	4.97003e+06	4.72128e+06	2.38069e+06	4.62239e+06	68556	4.8243e+06	4.37806e+06	4.02974e+06	4.63295e+06	4.50754e+06	5.25159e+06	106795	5.36834e+06	4.06761e+06	4.30366e+06	6.14199e+06	4.38318e+06	3.90942e+06
187.06084@1.905-rp	1.17431e+06	1.514e+06	962125	1.93773e+06	1.55962e+06	1.61293e+06	1.76884e+06	1.701e+06	1.42922e+06	1.70438e+06	1.75251e+06	1.43255e+06	1.83378e+06	2.0695e+06	1.5216e+06	2.08752e+06	1.67271e+06	1.84399e+06	2.4944e+06	1.52862e+06	2.29619e+06	1.9249e+06	1.17076e+06	1.87023e+06	16951.9	2.19526e+06	1.64324e+06	1815478	1.53736e+06	1.78403e+06	1.70622e+06	18573.9	2.20127e+06	1.94433e+06	1.64519e+06	2.04335e+06	1.62866e+06	1.16141e+06
Indole-3-acrylicacid@3.079-rp	1.8805e+08	2.64374e+08	1.9698e+08	3.09307e+08	2.77235e+08	2.13032e+08	2.91175e+08	2.54827e+08	2.30516e+08	2.66087e+08	3.09534e+08	2.34198e+08	2.5362e+08	3.3387e+08	2.75527e+08	3.3809e+08	2.38528e+08	3.05942e+08	3.51727e+08	2.81311e+08	352737574	3.35601e+08	1.8875e+08	3.20806e+08	504743	325774565	2.9342e+08	2.61584e+08	3.02758e+08	2.81265e+08	2.77167e+08	511241	3.79087e+08	3.88873e+08	2.84593e+08	3.61269e+08	2.72151e+08	2.45431e+08
Amino-oxononanoate@9.393-rp	304107	734910	1.05485e+06	1.01587e+06	859924	428336	1.22213e+06	477277	530455	898143	471851	450779	454052	691883	1.13258e+06	810090	536850	735444	1.01519e+06	567211	666842	1.08311e+06	437421	732837	20449.1	812950	744717	603928	754900	638728	653166	33049.6	1.03103e+06	1.14051e+06	814885	669331	641308	693153
187.15718@1.981-rp	263410	54658.6	41857.3	116967	210764	47826.4	54251.2	59857.5	298398	526244	1.77369e+06	57467.1	100550	75419.8	49200.3	85314.6	91669.6	1.19366e+06	760632	56451.5	75432.3	81069.8	53272	86151.2	28379.4	242192	262267	282865	267125	258976	253062	29815.3	1.28387e+06	50113.1	273366	418166	288523	65998.9
188.00867@1.252-rp	5.4847e+06	6.37447e+06	4.1453e+06	7.00062e+06	7.00654e+06	6.19164e+06	6.43407e+06	4.34586e+06	3.65773e+06	4.42083e+06	3.99459e+06	4.4936e+06	3.18409e+06	6.06117e+06	4.1376e+06	5.39457e+06	4.46937e+06	7.25607e+06	8.18749e+06	5.30583e+06	7.04214e+06	5.14388e+06	4.76674e+06	5.24663e+06	64105.3	6.61945e+06	5.56056e+06	4.23612e+06	6.19977e+06	5.47199e+06	6221972	43698.7	4.92294e+06	6.25852e+06	3.03803e+06	4.71526e+06	4.41139e+06	4.64526e+06
2-sulfobenzylalcohol@7.239-rp	43841.6	44957.6	44890.9	45461.2	45711.1	46011.3	145647	87846.7	779765	196114	104005	203713	1.75199e+06	1.73555e+06	884692	1.60747e+06	485033	2.0791e+06	119312	132769	109779	1.35406e+06	47799.6	109374	43165.2	452003	408172	370723	426310	350144	384135	45746.9	46015	110156	44501	57135.2	51953.6	89811.1
188.05087@6.552-rp	18578.2	21062.8	19211.5	21734.5	17789.2	20622.1	19494.2	21766.9	112509	16960.3	20080	19726.3	374215	336963	202216	730885	248411	557522	20960.1	46983.8	37550	561298	17380.6	16338.4	18881.2	93456	81050.8	87371.8	109773	95197.9	86887.5	17992.3	17920	24546.4	19265.7	16664.7	19626.7	16960
N-acetylglutamine@1.453-rp	2.72625e+07	3.5262e+07	3.23008e+07	3.84858e+07	3.00963e+07	2.2641e+07	4.15063e+07	4.81171e+07	3.76109e+07	3.78297e+07	3.60461e+07	3.97502e+07	3.17305e+07	5.83984e+07	3.06088e+07	4.16016e+07	4.84958e+07	4.67641e+07	3.91287e+07	3.86421e+07	3.88822e+07	5.00616e+07	3.40248e+07	5.13184e+07	169787	4.23816e+07	3.99174e+07	4.13586e+07	4.05505e+07	4.03337e+07	3.85106e+07	134575	3.6781e+07	3.65011e+07	3.34875e+07	4.41478e+07	4.23005e+07	2.54795e+07
Glycylleucine@1.669-rp	2.46993e+06	1.483e+06	1.6939e+06	2.26894e+06	1.74214e+06	1.15405e+06	2.63301e+06	1.98014e+06	1.79909e+06	1.49552e+06	2.37775e+06	1.33906e+06	1.04668e+06	3.87335e+06	2.79082e+06	1.71237e+06	2.09065e+06	4.52185e+06	7.35733e+06	1.63125e+06	4.57104e+06	2.19919e+06	1.99999e+06	4.24583e+06	25510.2	2.98797e+06	2.55303e+06	2.29967e+06	2.45559e+06	2.69188e+06	2.60533e+06	22552.1	4.11353e+06	2.16571e+06	1.08775e+06	2.77376e+06	1.40008e+06	1.50583e+06
188.12019@10.117-rp	44643.6	243684	382098	378444	422914	376847	684418	288563	239222	359419	274087	527637	385140	310676	283389	348538	466441	419765	712903	309124	226089	432330	292119	646277	95519.2	322402	397264	436967	633565	626970	549850	178489	116715	244510	291062	463765	617926	404305
188.12024@10.563-rp	138348	1.40755e+06	1.99892e+06	2.14275e+06	2.37173e+06	1.86556e+06	3.59909e+06	619598	1.02363e+06	2.37578e+06	2.14321e+06	3.0412e+06	1.7193e+06	832762	1.85314e+06	1.2085e+06	2.46241e+06	2.00038e+06	3.06312e+06	1.01134e+06	568729	1.96305e+06	860653	3.52148e+06	115206	1.52196e+06	1.90086e+06	2.33039e+06	2.62097e+06	2.98214e+06	3.07346e+06	196982	141868	1.25478e+06	1.89938e+06	3.43722e+06	2.92751e+06	2.85043e+06
188.97481@9.143-rp	67569.2	747326	1.34443e+06	1.39788e+06	379389	717480	105459	609160	703163	683331	282823	559827	726056	1.36865e+06	710710	444468	1.03489e+06	926231	491865	907595	1.54189e+06	919224	132170	501569	32185	788668	859176	722748	741285	729725	815709	28609.3	822862	1.1436e+06	60615	1.72867e+06	832029	660552
189.00976@1.871-rp	37416	81877.7	57648.4	134725	141255	68035.8	783144	513370	1.02609e+06	563327	1.30705e+06	757218	1.01261e+06	817654	909380	741450	943117	1.1415e+06	1.06303e+06	764095	819417	2.31202e+06	503246	1.16968e+06	16571.4	723808	731153	751075	723335	780597	714893	15590.2	707618	977336	636357	307759	940178	688973
2-amino-6-oxoheptanedioicacid@1.678-rp	1.63889e+07	3.07883e+07	1.12614e+07	2.56402e+07	2.13411e+07	1.67399e+07	2.94206e+07	3.1926e+07	1.71457e+07	1.86078e+07	2.71918e+07	2.82863e+07	1.25669e+07	2.73695e+07	1.86231e+07	2.0095e+07	3.27083e+07	4.18801e+07	4.34845e+07	3.32414e+07	3.77469e+07	2.66401e+07	1.88031e+07	2.9629e+07	89175.6	2.69108e+07	2.63648e+07	2.4235e+07	2.60603e+07	2.60626e+07	2.3187e+07	108498	3.18699e+07	3.40984e+07	1.30545e+07	2.55933e+07	1.44698e+07	2.85927e+07
2-methylindole-3-aceticacid@10.935-rp	99090.3	68731.2	120098	101952	133952	103586	2.01505e+06	2.25358e+06	1.61423e+06	2.26991e+06	2.5527e+06	1.61329e+06	1.22304e+06	1.65385e+06	1.60412e+06	1.20462e+06	1.09173e+06	1.09237e+06	2.96118e+06	2.41544e+06	2.74047e+06	2.96529e+06	1.19517e+06	1.44003e+06	328965	1.98762e+06	1.86609e+06	1.6589e+06	1.61259e+06	1.62792e+06	1.62343e+06	359149	4.15745e+06	4.22491e+06	1.52954e+06	2.51035e+06	3.43382e+06	2.94875e+06
189.08239@6.027-rp	279120	516240	127603	386787	510736	209792	1.23484e+06	935085	472204	674933	855351	454024	682697	1.02824e+06	556371	877043	544373	928499	847899	668102	1.21544e+06	694986	236269	732833	39925.3	1.09362e+06	985564	913949	739397	782924	682522	40074.7	1.34994e+06	784124	563371	927926	513494	471085
189.10034@2.119-rp	515567	838262	571984	1.10746e+06	704212	463490	950845	921483	725613	858147	988311	812180	615682	874203	655164	658564	703104	992704	1.27953e+06	994338	1.20398e+06	1.02767e+06	517256	974420	15593.2	846662	831398	755911	798403	809039	745382	15143.1	990826	922703	595217	890507	555039	635276
189.10036@5.313-rp	757996	1.9826e+06	801831	1.79853e+06	1.58438e+06	1.00651e+06	1.43264e+06	1.05619e+06	1.17299e+06	1.21168e+06	1.50427e+06	731594	799610	1.61496e+06	1.36943e+06	1.20236e+06	973566	1.7892e+06	2.2864e+06	1.84694e+06	1.92138e+06	1.76838e+06	665639	2.1867e+06	27749.8	1.42174e+06	1.37749e+06	1.42895e+06	1.45762e+06	1.43527e+06	1.39857e+06	26569.5	1.38566e+06	2.20154e+06	971668	609463	859812	1.13579e+06
2,4-dichlorobenzoicacid@11.075-rp	1.61564e+06	8.25869e+06	1.76918e+07	2.40585e+07	4.69155e+06	6.89021e+06	1.63653e+06	6.75161e+06	8.88172e+06	8.478e+06	2.64256e+06	5.17706e+06	5.92689e+06	2.2344e+07	1.15135e+07	4.48433e+06	1.49738e+07	1.07972e+07	4.33657e+06	1.41001e+07	2.7251e+07	1.47801e+07	2.57718e+06	7.74885e+06	990587	1.03799e+07	1.09242e+07	9.3934e+06	1.00285e+07	1.02526e+07	1.09345e+07	1.53738e+06	7.99355e+06	1.50017e+07	2.30762e+06	3.03925e+07	8.13386e+06	6.92338e+06
[truncated: 3,022 more rows]

## Sheet: AreaQCCorr
	liver-690-ATB_55	liver-692-ATB_57	liver-686-ATB_51	liver-688-ATB_53	liver-691-ATB_56	liver-694-ATB_59	liver-666-FMT_31	liver-670-FMT_35	liver-683-FMT_48	liver-682-FMT_47	liver-678-FMT_43	liver-669-FMT_34	liver-668-FMT-AKK_33	liver-675-FMT-AKK_40	liver-680-FMT-AKK_45	liver-679-FMT-AKK_44	liver-672-FMT-AKK_37	liver-674-FMT-AKK_39	liver-667-FMT-AKK-Pas_32	liver-681-FMT-AKK-Pas_46	liver-676-FMT-AKK-Pas_41	liver-673-FMT-AKK-Pas_38	liver-677-FMT-AKK-Pas_42	liver-671-FMT-AKK-Pas_36	Bl_matrice-liver_5a	QC_liver_6a	QC_liver_6b	QC_liver_6c	QC_liver_6d	QC_liver_6e	QC_batch_6f	Bl_matrice_5b	liver-684-SPF_49	liver-685-SPF_50	liver-689-SPF_54	liver-687-SPF_52	liver-693-SPF_58	liver-695-SPF_60
[truncated: 3,493 more rows]

[truncated: 2 more sheets: FoldChangeLog2, pvalue]
