# Supplementary material for: Oral administration of Akkermansia muciniphila elevates systemic antiaging and anticancer metabolites
Source: Aging (Albany NY). 2021 Mar 2;13(5):6375–405. doi: 10.18632/aging.202739 (PMC7993698; doi:10.18632/aging.202739)
Supplement: Supplementary Table 8 [file aging-13-202739-s009.xlsx]

## Sheet: SampleInfos
Supplementary Table 8. Related to Figures 5, 6. Metabolic signature obtained through untargeted metabolomic analysis from PLASMA samples from mice treated with FMT, Akk or with Akk-past (versus PBS or continuous ATB).
Sid	sType	Grp	Color
plasma-690-ATB_25	Sa	ATB	#FB6A4A
plasma-692-ATB_27	Sa	ATB	#FB6A4A
plasma-686-ATB_21	Sa	ATB	#FB6A4A
plasma-688-ATB_23	Sa	ATB	#FB6A4A
plasma-691-ATB_26	Sa	ATB	#FB6A4A
plasma-694-ATB_29	Sa	ATB	#FB6A4A
plasma-666-FMT_1	Sa	FMT	#9E9AC8
plasma-670-FMT_5	Sa	FMT	#9E9AC8
plasma-683-FMT_18	Sa	FMT	#9E9AC8
plasma-682-FMT_17	Sa	FMT	#9E9AC8
plasma-678-FMT_13	Sa	FMT	#9E9AC8
plasma-669-FMT_4	Sa	FMT	#9E9AC8
plasma-668-FMT-AKK_3	Sa	FMT-AKK	#7960AB
plasma-675-FMT-AKK_10	Sa	FMT-AKK	#7960AB
plasma-680-FMT-AKK_15	Sa	FMT-AKK	#7960AB
plasma-679-FMT-AKK_14	Sa	FMT-AKK	#7960AB
plasma-672-FMT-AKK_7	Sa	FMT-AKK	#7960AB
plasma-674-FMT-AKK_9	Sa	FMT-AKK	#7960AB
plasma-667-FMT-AKK-Pas_2	Sa	FMT-AKK-Pas	#54278F
plasma-681-FMT-AKK-Pas_16	Sa	FMT-AKK-Pas	#54278F
plasma-676-FMT-AKK-Pas_11	Sa	FMT-AKK-Pas	#54278F
plasma-677-FMT-AKK-Pas_12	Sa	FMT-AKK-Pas	#54278F
plasma-671-FMT-AKK-Pas_6	Sa	FMT-AKK-Pas	#54278F
Bl_matrice-plasma_3a	Bl	#N/A	#N/A
QC_plasma_4a	QC	#N/A	#N/A
QC_plasma_4b	QC	#N/A	#N/A
QC_plasma_4c	QC	#N/A	#N/A
QC_plasma_4d	QC	#N/A	#N/A
QC_plasma_4e	QC	#N/A	#N/A
Bl_matrice-plasma_3b	Bl	#N/A	#N/A
plasma-684-SPF_19	Sa	SPF	#74C476
plasma-685-SPF_20	Sa	SPF	#74C476
plasma-689-SPF_24	Sa	SPF	#74C476
plasma-687-SPF_22	Sa	SPF	#74C476
plasma-693-SPF_28	Sa	SPF	#74C476
plasma-695-SPF_30	Sa	SPF	#74C476

## Sheet: MetabolitesInfos
Checked	Analyte	MetName	MW	RT	MF	CSID	KEGG	Method
VRAI	3-acetamidopropanal@1.665-rp	3-acetamidopropanal	115.063	1.665	C5H9NO2	4574010	Metabolic pathways;Biosynthesis of secondary metabolites;Biosynthesis of amino acids;ABC transporters;Central carbon metabolism in cancer;Arginine and proline metabolism;Other	rp
VRAI	3-Methylbenzol-1,2-diol@9.688-rp	3-Methylbenzol-1,2-diol	124.052	9.688	C7H8O2	333	Metabolic pathways;Microbial metabolism in diverse environments;Degradation of aromatic compounds;Other	rp
VRAI	2-Mercapto-2-methylpentan-4-one@9.689-rp	2-Mercapto-2-methylpentan-4-one	132.061	9.689	C6H12OS	79650	#N/A	rp
VRAI	5-Hydroxy-2,4-decadienoicacid?-lactone@9.688-rp	5-Hydroxy-2,4-decadienoicacid?-lactone	166.099	9.688	C10H14O2	#N/A	Metabolic pathways;Biosynthesis of secondary metabolites;Other	rp
VRAI	171.52677@9.687-rp	#N/A	171.527	9.687	#N/A	#N/A	#N/A	rp
VRAI	(E)-Dacarbazine@7.639-rp	(E)-Dacarbazine	182.092	7.639	C6H10N6O	10481959	#N/A	rp
VRAI	3-hexoxythiophene@9.688-rp	3-hexoxythiophene	184.092	9.688	C10H16OS	9216585	#N/A	rp
VRAI	p-Cresylsulfate@7.481-rp	p-Cresylsulfate	188.014	7.481	C7H8O4S	3806481	Microbial metabolism in diverse environments;Degradation of aromatic compounds;Other	rp
VRAI	2-(2-methylthiopropyl)maleicacid@7.017-rp	2-(2-methylthiopropyl)maleicacid	204.045	7.017	C8H12O4S	58827643	#N/A	rp
VRAI	214.10257@14.264-rp	#N/A	214.103	14.264	C11H18O2S	#N/A	#N/A	rp
VRAI	222.12712@13.335-rp	#N/A	222.127	13.335	#N/A	#N/A	#N/A	rp
VRAI	Methyl(2E,4E)-6-hydroxy-10-sulfanyl-2,4-decadienoate@9.689-rp	Methyl(2E,4E)-6-hydroxy-10-sulfanyl-2,4-decadienoate	230.097	9.689	C11H18O3S	#N/A	Metabolic pathways;Histidine metabolism	rp
VRAI	4-[(3-Oxobutyl)sulfanyl]cyclohexanecarboxylicacid@7.811-rp	4-[(3-Oxobutyl)sulfanyl]cyclohexanecarboxylicacid	230.097	7.811	C11H18O3S	#N/A	Metabolic pathways;Histidine metabolism	rp
VRAI	Ethyl2-[(tetrahydro-2H-pyran-4-ylsulfanyl)methyl]acrylate@8.095-rp	Ethyl2-[(tetrahydro-2H-pyran-4-ylsulfanyl)methyl]acrylate	230.097	8.095	C11H18O3S	#N/A	Metabolic pathways;Histidine metabolism	rp
VRAI	246.0922@6.568-rp	#N/A	246.092	6.568	C11H18O4S	#N/A	#N/A	rp
VRAI	246.09234@10.672-rp	#N/A	246.092	10.672	C11H18O4S	#N/A	#N/A	rp
VRAI	Daidzein@10.611-rp	Daidzein	254.057	10.611	C15H10O4	4445025	Biosynthesis of secondary metabolites;Biosynthesis of phenylpropanoids;Other	rp
VRAI	Hispidol@11.093-rp	Hispidol	254.058	11.093	C15H10O4	#N/A	Biosynthesis of secondary metabolites;Biosynthesis of phenylpropanoids;Other	rp
VRAI	Homovanillicacidsulfate@6.474-rp	Homovanillicacidsulfate	262.015	6.474	C9H10O7S	21896746	#N/A	rp
VRAI	Thiaminealdehyde@7.015-rp	Thiaminealdehyde	262.088	7.015	C12H14N4OS	#N/A	#N/A	rp
VRAI	268.11599@1.741-rp	#N/A	268.116	1.741	C10H20O8	#N/A	#N/A	rp
VRAI	Genistein@11.746-rp	Genistein	270.053	11.746	C15H10O5	4444448	Metabolic pathways;Biosynthesis of secondary metabolites;Biosynthesis of phenylpropanoids;Other	rp
VRAI	Apigenin@12.433-rp	Apigenin	270.053	12.433	C15H10O5	4444100	Metabolic pathways;Biosynthesis of secondary metabolites;Biosynthesis of phenylpropanoids;Other	rp
VRAI	283.99666@6.476-rp	#N/A	283.997	6.476	C15H10P2S	#N/A	#N/A	rp
VRAI	4-Methylphenyl?-D-glucopyranosiduronicacid@6.763-rp	4-Methylphenyl?-D-glucopyranosiduronicacid	284.09	6.763	C13H16O7	#N/A	#N/A	rp
VRAI	4-Hydroxy-5-[3-(sulfooxy)phenyl]pentanoicacid@9.652-rp	4-Hydroxy-5-[3-(sulfooxy)phenyl]pentanoicacid	290.046	9.652	C11H14O7S	35031663	#N/A	rp
VRAI	296.14702@4.975-rp	#N/A	296.147	4.975	C9H16N10O2	#N/A	#N/A	rp
VRAI	2-Phenylethylbeta-D-glucopyranosiduronicacid@8.719-rp	2-Phenylethylbeta-D-glucopyranosiduronicacid	298.105	8.719	C14H18O7	30776590	#N/A	rp
VRAI	318.11328@7.806-rp	#N/A	318.113	7.806	C14H22O6S	#N/A	#N/A	rp
VRAI	318.11337@8.093-rp	#N/A	318.113	8.093	C14H22O6S	#N/A	#N/A	rp
VRAI	3,7-Dihydroxy-2-(3-hydroxyphenyl)-5-chromanesulfinicacid@11.38-rp	3,7-Dihydroxy-2-(3-hydroxyphenyl)-5-chromanesulfinicacid	322.051	11.38	C15H14O6S	74852037	#N/A	rp
VRAI	326.15507@14.778-rp	#N/A	326.155	14.778	C18H22N4S	#N/A	#N/A	rp
VRAI	328.06522@9.689-rp	#N/A	328.065	9.689	C21H13O2P	#N/A	#N/A	rp
VRAI	4'-Hydroxy-5,6,7-trimethoxyflavanone@10.056-rp	4'-Hydroxy-5,6,7-trimethoxyflavanone	330.11	10.056	C18H18O6	213722	#N/A	rp
VRAI	3-(7-Hydroxy-4-oxo-4H-chromen-2-yl)phenylhydrogensulfate@10.609-rp	3-(7-Hydroxy-4-oxo-4H-chromen-2-yl)phenylhydrogensulfate	334.015	10.609	C15H10O7S	74853277	#N/A	rp
VRAI	336.06695@13.76-rp	#N/A	336.067	13.76	C16H16O6S	#N/A	#N/A	rp
VRAI	344.03759@9.687-rp	#N/A	344.038	9.687	C6H12N6O9S	#N/A	#N/A	rp
VRAI	5-Hydroxy-2-(4-hydroxyphenyl)-4-oxo-4H-chromen-7-ylhydrogensulfate@11.746-rp	5-Hydroxy-2-(4-hydroxyphenyl)-4-oxo-4H-chromen-7-ylhydrogensulfate	350.01	11.746	C15H10O8S	24843470	#N/A	rp
VRAI	Dihydronaringenin-O-sulphate@11.8-rp	Dihydronaringenin-O-sulphate	354.041	11.8	C15H14O8S	30778503	#N/A	rp
VRAI	5,5',6,6'-Tetramethyl-3,3'-di-tert-butyl-1,1'-biphenyl-2,2'-diol@13.332-rp	5,5',6,6'-Tetramethyl-3,3'-di-tert-butyl-1,1'-biphenyl-2,2'-diol	354.255	13.332	C24H34O2	2505433	#N/A	rp
VRAI	1-[1-ethyl-6-methyl-4-(4-phenyl-1-piperazinyl)-2-sulfanylidene-5-pyrimidinyl]ethanone@12.193-rp	1-[1-ethyl-6-methyl-4-(4-phenyl-1-piperazinyl)-2-sulfanylidene-5-pyrimidinyl]ethanone	356.166	12.193	C19H24N4OS	1127833	#N/A	rp
VRAI	Ethyldocosahexaenoate@16.212-rp	Ethyldocosahexaenoate	356.271	16.212	C24H36O2	8007148	#N/A	rp
VRAI	360.19707@14.721-rp	#N/A	360.197	14.721	C13H29N8PS	#N/A	#N/A	rp
VRAI	8-Hydroxy-3-[(6E)-6-pentadecen-1-yl]-3,4-dihydro-1H-isochromen-1-one@14.312-rp	8-Hydroxy-3-[(6E)-6-pentadecen-1-yl]-3,4-dihydro-1H-isochromen-1-one	372.266	14.312	C24H36O3	35015152	#N/A	rp
VRAI	Cervonoylethanolamide@13.336-rp	Cervonoylethanolamide	372.266	13.336	C24H36O3	30776716	#N/A	rp
VRAI	(17beta)-17-(Tetrahydro-2H-pyran-2-yloxy)androst-4-en-3-one@12.246-rp	(17beta)-17-(Tetrahydro-2H-pyran-2-yloxy)androst-4-en-3-one	372.266	12.246	C24H36O3	17220795	#N/A	rp
VRAI	Bis(2-ethylhexyl)phthalate@13.542-rp	Bis(2-ethylhexyl)phthalate	388.261	13.542	C24H36O4	10607645	#N/A	rp
VRAI	Deoxycholicacid@16.205-rp	Deoxycholicacid	392.293	16.205	C24H40O4	193196	Metabolic pathways;Other	rp
VRAI	392.29289@15.474-rp	#N/A	392.293	15.474	C18H41N4O3P	#N/A	Metabolic pathways;Other	rp
VRAI	403.05057@9.689-rp	#N/A	403.051	9.689	C15H13N7O3S2	#N/A	#N/A	rp
VRAI	Ardisianone@13.622-rp	Ardisianone	406.272	13.622	C24H38O5	391071	#N/A	rp
VRAI	7a,12a-dihydroxy-3-oxo-5b-cholan-24-oicacid@13.541-rp	7a,12a-dihydroxy-3-oxo-5b-cholan-24-oicacid	406.272	13.541	C24H38O5	4447044	#N/A	rp
VRAI	Alpha-muricholate@13.336-rp	Alpha-muricholate	408.288	13.336	C24H40O5	#N/A	Metabolic pathways;Other	rp
VRAI	Cholicacid@14.313-rp	Cholicacid	408.288	14.313	C24H40O5	#N/A	Metabolic pathways;Other	rp
VRAI	418.12637@9.838-rp	#N/A	418.126	9.838	C19H25N4OP3	#N/A	#N/A	rp
VRAI	425.31362@14.311-rp	#N/A	425.314	14.311	C25H39N5O	#N/A	#N/A	rp
VRAI	Daidzein-7-O-glucuronide@8.408-rp	Daidzein-7-O-glucuronide	430.09	8.408	C21H18O10	9491321	#N/A	rp
VRAI	430.26882@14.313-rp	#N/A	430.269	14.313	C25H40N2P2	#N/A	#N/A	rp
VRAI	Prunin@10.41-rp	Prunin	434.121	10.41	C21H22O10	83766	Other	rp
VRAI	Baicalin@9.341-rp	Baicalin	446.085	9.341	C21H18O11	58507	#N/A	rp
VRAI	Quercitrin@9.211-rp	Quercitrin	448.101	9.211	C21H20O11	4444112	Biosynthesis of secondary metabolites;Other	rp
VRAI	452.31379@16.101-rp	#N/A	452.314	16.101	C23H36N10	#N/A	#N/A	rp
VRAI	Spirostan-3-ylacetate@16.827-rp	Spirostan-3-ylacetate	458.34	16.827	C29H46O4	276847	#N/A	rp
VRAI	(1R)-1'-(cyclohexylmethyl)-1-(hydroxymethyl)-7-methoxy-9-methyl-N-propyl-2-spiro[1,3-dihydropyrido[3,4-b]indole-4,3'-azetidine]carboxamide@13.472-rp	(1R)-1'-(cyclohexylmethyl)-1-(hydroxymethyl)-7-methoxy-9-methyl-N-propyl-2-spiro[1,3-dihydropyrido[3,4-b]indole-4,3'-azetidine]carboxamide	468.309	13.472	C27H40N4O3	58160944	#N/A	rp
VRAI	474.29591@16.214-rp	#N/A	474.296	16.214	C25H49O2P3	#N/A	#N/A	rp
VRAI	490.29048@14.311-rp	#N/A	490.29	14.311	C23H42N2O9	#N/A	#N/A	rp
VRAI	490.29051@13.334-rp	#N/A	490.291	13.334	C25H49O3P3	#N/A	#N/A	rp
VRAI	506.26418@13.335-rp	#N/A	506.264	13.335	C27H44N2OP2S	#N/A	#N/A	rp
VRAI	1-[(3R,9R,10S)-9-[(dimethylamino)methyl]-12-[(2R)-1-hydroxypropan-2-yl]-3,10-dimethyl-13-oxo-2,8-dioxa-12-azabicyclo[12.4.0]octadeca-1(14),15,17-trien-16-yl]-3-(4-methoxyphenyl)urea@12.243-rp	1-[(3R,9R,10S)-9-[(dimethylamino)methyl]-12-[(2R)-1-hydroxypropan-2-yl]-3,10-dimethyl-13-oxo-2,8-dioxa-12-azabicyclo[12.4.0]octadeca-1(14),15,17-trien-16-yl]-3-(4-methoxyphenyl)urea	570.341	12.243	C31H46N4O6	4447042	#N/A	rp
FAUX	100.00086@0.846-rp	#N/A	100.001	0.846	#N/A	#N/A	#N/A	rp
FAUX	Succinicanhydride@1.56-rp	Succinicanhydride	100.016	1.56	C4H4O3	7634	#N/A	rp
FAUX	2-methyl-3-oxopropanoicacid@1.4-rp	2-methyl-3-oxopropanoicacid	102.032	1.4	C4H6O3	#N/A	Metabolic pathways;Biosynthesis of secondary metabolites;Microbial metabolism in diverse environments;Biosynthesis of amino acids;2-Oxocarboxylic acid metabolism;Other	rp
FAUX	2-methyl-3-oxopropanoicacid@0.988-rp	2-methyl-3-oxopropanoicacid	102.032	0.988	C4H6O3	#N/A	Metabolic pathways;Biosynthesis of secondary metabolites;Microbial metabolism in diverse environments;Biosynthesis of amino acids;2-Oxocarboxylic acid metabolism;Other	rp
FAUX	Phenylacetylene@1.895-rp	Phenylacetylene	102.047	1.895	C8H6	10364	#N/A	rp
FAUX	Thiomorpholine@1.216-rp	Thiomorpholine	103.045	1.216	C4H9NS	60509	#N/A	rp
FAUX	Choline@0.99-rp	Choline	103.1	0.99	C5H13NO	#N/A	#N/A	rp
FAUX	103.98489@0.929-rp	#N/A	103.985	0.929	#N/A	#N/A	#N/A	rp
FAUX	104.02607@5.98-rp	#N/A	104.026	5.98	C7H4O	#N/A	#N/A	rp
FAUX	2-hydroxybutyricacid@1.555-rp	2-hydroxybutyricacid	104.047	1.555	C4H8O3	#N/A	Metabolic pathways;Microbial metabolism in diverse environments;Other	rp
FAUX	1,3-Dimethoxypropane@8.939-rp	1,3-Dimethoxypropane	104.084	8.939	C5H12O2	123622	#N/A	rp
FAUX	Serine@0.992-rp	Serine	105.042	0.992	C3H7NO3	#N/A	Metabolic pathways;Biosynthesis of secondary metabolites;Microbial metabolism in diverse environments;Biosynthesis of plant secondary metabolites;Biosynthesis of amino acids;ABC transporters;Central carbon metabolism in cancer;Other	rp
FAUX	Glycericacid@1.102-rp	Glycericacid	106.027	1.102	C3H6O4	#N/A	Metabolic pathways;Biosynthesis of secondary metabolites;Microbial metabolism in diverse environments;Other	rp
FAUX	3,4-Diaminopyridine@0.961-rp	3,4-Diaminopyridine	109.064	0.961	C5H7N3	5705	#N/A	rp
FAUX	Cytosine@1.417-rp	Cytosine	111.043	1.417	C4H5N3O	577	Metabolic pathways;Pyrimidine metabolism	rp
FAUX	Cytosine@1.17-rp	Cytosine	111.043	1.17	C4H5N3O	577	Metabolic pathways;Pyrimidine metabolism	rp
FAUX	Cytosine@1.418-rp	Cytosine	111.044	1.418	C4H5N3O	577	Metabolic pathways;Pyrimidine metabolism	rp
FAUX	2-furoicacid@1.392-rp	2-furoicacid	112.016	1.392	C5H4O3	#N/A	Metabolic pathways;Microbial metabolism in diverse environments;Other	rp
FAUX	Uracil@1.711-rp	Uracil	112.027	1.711	C4H4N2O2	1141	Metabolic pathways;Pyrimidine metabolism;Other	rp
FAUX	3165@8.463-rp	3165	112.089	8.463	C7H12O	4446437	#N/A	rp
FAUX	1-pyrroline-2-carboxylicacid@1.627-rp	1-pyrroline-2-carboxylicacid	113.048	1.627	C5H7NO2	#N/A	Metabolic pathways;Biosynthesis of secondary metabolites;Biosynthesis of amino acids;Arginine and proline metabolism;Other	rp
FAUX	Creatinine@1.012-rp	Creatinine	113.059	1.012	C4H7N3O	568	Metabolic pathways;Arginine and proline metabolism	rp
FAUX	2-hydroxy-2,4-pentadienoate@8.938-rp	2-hydroxy-2,4-pentadienoate	114.032	8.938	C5H6O3	#N/A	Metabolic pathways;Microbial metabolism in diverse environments;Degradation of aromatic compounds;Phenylalanine metabolism;Other	rp
FAUX	2-hydroxy-2,4-pentadienoate@0.99-rp	2-hydroxy-2,4-pentadienoate	114.032	0.99	C5H6O3	#N/A	Metabolic pathways;Microbial metabolism in diverse environments;Degradation of aromatic compounds;Phenylalanine metabolism;Other	rp
FAUX	1H-Inden-1-ylidene@3.063-rp	1H-Inden-1-ylidene	114.047	3.063	C9H6	10384079	#N/A	rp
FAUX	2-hydroxycyclohexan-1-one@3.713-rp	2-hydroxycyclohexan-1-one	114.068	3.713	C6H10O2	#N/A	Microbial metabolism in diverse environments;Degradation of aromatic compounds;Other	rp
FAUX	1-Amino-2,4-imidazolidinedione@1.101-rp	1-Amino-2,4-imidazolidinedione	115.038	1.101	C3H5N3O2	65659	#N/A	rp
FAUX	Proline@1.07-rp	Proline	115.063	1.07	C5H9NO2	#N/A	Metabolic pathways;Biosynthesis of secondary metabolites;Biosynthesis of amino acids;ABC transporters;Central carbon metabolism in cancer;Arginine and proline metabolism;Other	rp
FAUX	Fumaricacid@1.59-rp	Fumaricacid	116.011	1.59	C4H4O4	10197150	Metabolic pathways;Biosynthesis of secondary metabolites;Microbial metabolism in diverse environments;Biosynthesis of plant secondary metabolites;Degradation of aromatic compounds;Biosynthesis of alkaloids derived from shikimate pathway;Phenylalanine metabolism;Biosynthesis of phenylpropanoids;Biosynthesis of plant hormones;Central carbon metabolism in cancer;Biosynthesis of alkaloids derived fro…	rp
FAUX	2-oxovalericacid@1.835-rp	2-oxovalericacid	116.047	1.835	C5H8O3	#N/A	Metabolic pathways;Biosynthesis of secondary metabolites;Microbial metabolism in diverse environments;Biosynthesis of amino acids;2-Oxocarboxylic acid metabolism;Other	rp
FAUX	116.04981@3.054-rp	#N/A	116.05	3.054	C4H9N2P	#N/A	#N/A	rp
FAUX	Phenylacetonitrile@3.057-rp	Phenylacetonitrile	117.058	3.057	C8H7N	#N/A	Metabolic pathways;Biosynthesis of secondary metabolites;Microbial metabolism in diverse environments;Other	rp
FAUX	Phenylacetonitrile@1.899-rp	Phenylacetonitrile	117.058	1.899	C8H7N	#N/A	Metabolic pathways;Biosynthesis of secondary metabolites;Microbial metabolism in diverse environments;Other	rp
FAUX	Phenylacetonitrile@10.937-rp	Phenylacetonitrile	117.058	10.937	C8H7N	#N/A	Metabolic pathways;Biosynthesis of secondary metabolites;Microbial metabolism in diverse environments;Other	rp
FAUX	4-methylaminobutyricacid@1.098-rp	4-methylaminobutyricacid	117.079	1.098	C5H11NO2	63869	Metabolic pathways;Biosynthesis of secondary metabolites;Microbial metabolism in diverse environments;Biosynthesis of plant secondary metabolites;Biosynthesis of amino acids;2-Oxocarboxylic acid metabolism;Biosynthesis of alkaloids derived from shikimate pathway;ABC transporters;Central carbon metabolism in cancer;Arginine and proline metabolism;Other	rp
FAUX	1-Chloro-1,2,2-trifluoroethane@0.953-rp	1-Chloro-1,2,2-trifluoroethane	117.98	0.953	C2H2ClF3	83736	#N/A	rp
FAUX	118.0115@0.838-rp	#N/A	118.011	0.838	#N/A	#N/A	#N/A	rp
FAUX	Coumarone@1.446-rp	Coumarone	118.042	1.446	C8H6O	8868	#N/A	rp
FAUX	2-hydroxy-2-methylbutyricacid@2.166-rp	2-hydroxy-2-methylbutyricacid	118.063	2.166	C5H10O3	#N/A	Metabolic pathways;Other	rp
FAUX	2-hydroxy-2-methylbutyricacid@2.524-rp	2-hydroxy-2-methylbutyricacid	118.063	2.524	C5H10O3	#N/A	Metabolic pathways;Other	rp
FAUX	2-methylserine@0.992-rp	2-methylserine	119.058	0.992	C4H9NO3	#N/A	Metabolic pathways;Biosynthesis of secondary metabolites;Microbial metabolism in diverse environments;Biosynthesis of plant secondary metabolites;Biosynthesis of amino acids;ABC transporters;Other	rp
FAUX	119.95877@0.935-rp	#N/A	119.959	0.935	#N/A	#N/A	#N/A	rp
FAUX	2-hydroxynicotinonitrile@1.724-rp	2-hydroxynicotinonitrile	120.032	1.724	C6H4N2O	502058	#N/A	rp
FAUX	Erythrose@1.177-rp	Erythrose	120.042	1.177	C4H8O4	#N/A	#N/A	rp
FAUX	4-hydroxystyrene@1.45-rp	4-hydroxystyrene	120.057	1.45	C8H8O	#N/A	Metabolic pathways;Microbial metabolism in diverse environments;Degradation of aromatic compounds;Phenylalanine metabolism;Phenylpropanoid biosynthesis;Other	rp
FAUX	4-hydroxystyrene@8.169-rp	4-hydroxystyrene	120.057	8.169	C8H8O	#N/A	Metabolic pathways;Microbial metabolism in diverse environments;Degradation of aromatic compounds;Phenylalanine metabolism;Phenylpropanoid biosynthesis;Other	rp
FAUX	4-hydroxystyrene@8.723-rp	4-hydroxystyrene	120.057	8.723	C8H8O	#N/A	Metabolic pathways;Microbial metabolism in diverse environments;Degradation of aromatic compounds;Phenylalanine metabolism;Phenylpropanoid biosynthesis;Other	rp
FAUX	(Nitroimino)dimethanol@0.837-rp	(Nitroimino)dimethanol	122.033	0.837	C2H6N2O4	7822124	#N/A	rp
FAUX	2-hydroxybenzaldehyde@1.448-rp	2-hydroxybenzaldehyde	122.037	1.448	C7H6O2	#N/A	Metabolic pathways;Biosynthesis of secondary metabolites;Microbial metabolism in diverse environments;Degradation of aromatic compounds;Biosynthesis of alkaloids derived from shikimate pathway;Phenylalanine metabolism;Biosynthesis of phenylpropanoids;Other	rp
FAUX	Niacinamide@2.383-rp	Niacinamide	122.048	2.383	C6H6N2O	#N/A	Metabolic pathways;Other	rp
FAUX	1-phenylethanol@8.113-rp	1-phenylethanol	122.073	8.113	C8H10O	#N/A	Metabolic pathways;Microbial metabolism in diverse environments;Degradation of aromatic compounds;Phenylalanine metabolism;Other	rp
FAUX	1-phenylethanol@7.557-rp	1-phenylethanol	122.073	7.557	C8H10O	#N/A	Metabolic pathways;Microbial metabolism in diverse environments;Degradation of aromatic compounds;Phenylalanine metabolism;Other	rp
FAUX	1-phenylethanol@6.48-rp	1-phenylethanol	122.073	6.48	C8H10O	#N/A	Metabolic pathways;Microbial metabolism in diverse environments;Degradation of aromatic compounds;Phenylalanine metabolism;Other	rp
FAUX	123.01692@0.847-rp	#N/A	123.017	0.847	C2H5NO5	#N/A	#N/A	rp
FAUX	107089@10.789-rp	107089	123.105	10.789	C8H13N	10155	#N/A	rp
FAUX	124.01771@0.853-rp	#N/A	124.018	0.853	#N/A	#N/A	#N/A	rp
FAUX	124.01858@0.849-rp	#N/A	124.019	0.849	#N/A	#N/A	#N/A	rp
FAUX	GV9100000@9.844-rp	GV9100000	124.089	9.844	C8H12O	6277	#N/A	rp
FAUX	Taurine@1.009-rp	Taurine	125.015	1.009	C2H7NO3S	1091	Metabolic pathways;ABC transporters;Other	rp
FAUX	UC1430000@0.813-rp	UC1430000	125.965	0.813	C3H4Cl2O	21106513	#N/A	rp
FAUX	2-hydroxyethanesulfonicacid@1.08-rp	2-hydroxyethanesulfonicacid	125.999	1.08	C2H6O4S	#N/A	Metabolic pathways;Other	rp
FAUX	5hydroxymethylfurfural@1.018-rp	5hydroxymethylfurfural	126.032	1.018	C6H6O3	#N/A	Metabolic pathways;Biosynthesis of secondary metabolites;Microbial metabolism in diverse environments;Other	rp
FAUX	Imidazole-4-aceticacid@4.121-rp	Imidazole-4-aceticacid	126.043	4.121	C5H6N2O2	#N/A	Metabolic pathways;Histidine metabolism;Pyrimidine metabolism	rp
FAUX	2-Propylthiophene@0.914-rp	2-Propylthiophene	126.05	0.914	C7H10S	66411	#N/A	rp
FAUX	2707@13.122-rp	2707	126.104	13.122	C8H14O	9478	Metabolic pathways;Biosynthesis of secondary metabolites;Other	rp
FAUX	2707@11.003-rp	2707	126.104	11.003	C8H14O	9478	Metabolic pathways;Biosynthesis of secondary metabolites;Other	rp
FAUX	2707@11.11-rp	2707	126.104	11.11	C8H14O	9478	Metabolic pathways;Biosynthesis of secondary metabolites;Other	rp
FAUX	2707@9.842-rp	2707	126.104	9.842	C8H14O	9478	Metabolic pathways;Biosynthesis of secondary metabolites;Other	rp
FAUX	2707@12.831-rp	2707	126.104	12.831	C8H14O	9478	Metabolic pathways;Biosynthesis of secondary metabolites;Other	rp
FAUX	127.02435@0.967-rp	#N/A	127.024	0.967	#N/A	#N/A	#N/A	rp
FAUX	Methyltrifluoroacetate@0.893-rp	Methyltrifluoroacetate	128.008	0.893	C3H3F3O2	9509	#N/A	rp
FAUX	Methylenesuccinate@1.398-rp	Methylenesuccinate	128.011	1.398	C5H4O4	4573697	#N/A	rp
FAUX	2-hydroxyhexdienoicacid@9.839-rp	2-hydroxyhexdienoicacid	128.047	9.839	C6H8O3	#N/A	Metabolic pathways;Microbial metabolism in diverse environments;Degradation of aromatic compounds;Other	rp
FAUX	3-isopropyl-3-butenoicacid@6.359-rp	3-isopropyl-3-butenoicacid	128.084	6.359	C7H12O2	#N/A	Metabolic pathways;Microbial metabolism in diverse environments;Other	rp
FAUX	129.00376@0.905-rp	#N/A	129.004	0.905	#N/A	#N/A	#N/A	rp
FAUX	129.00456@0.888-rp	#N/A	129.005	0.888	#N/A	#N/A	#N/A	rp
FAUX	4-oxoproline@0.995-rp	4-oxoproline	129.042	0.995	C5H7NO3	#N/A	Metabolic pathways;Biosynthesis of secondary metabolites;Arginine and proline metabolism;Other	rp
FAUX	4-oxoproline@1.459-rp	4-oxoproline	129.043	1.459	C5H7NO3	#N/A	Metabolic pathways;Biosynthesis of secondary metabolites;Arginine and proline metabolism;Other	rp
FAUX	leucoline@9.519-rp	leucoline	129.058	9.519	C9H7N	6780	#N/A	rp
FAUX	leucoline@3.06-rp	leucoline	129.058	3.06	C9H7N	6780	#N/A	rp
FAUX	leucoline@10.935-rp	leucoline	129.058	10.935	C9H7N	6780	#N/A	rp
FAUX	4-acetamidobutanal@0.884-rp	4-acetamidobutanal	129.079	0.884	C6H11NO2	389692	Metabolic pathways;Biosynthesis of secondary metabolites;Biosynthesis of plant secondary metabolites;Biosynthesis of alkaloids derived from ornithine, lysine and nicotinic acid;Arginine and proline metabolism;Other	rp
FAUX	4-acetamidobutanal@1.19-rp	4-acetamidobutanal	129.079	1.19	C6H11NO2	389692	Metabolic pathways;Biosynthesis of secondary metabolites;Biosynthesis of plant secondary metabolites;Biosynthesis of alkaloids derived from ornithine, lysine and nicotinic acid;Arginine and proline metabolism;Other	rp
FAUX	2,5-dioxopentanoicacid@1.421-rp	2,5-dioxopentanoicacid	130.027	1.421	C5H6O4	#N/A	Metabolic pathways;Microbial metabolism in diverse environments;2-Oxocarboxylic acid metabolism;Arginine and proline metabolism;Other	rp
FAUX	1099281@9.227-rp	1099281	130.042	9.227	C9H6O	68257	#N/A	rp
FAUX	1-oxa-2-oxo-3-hydroxycycloheptane@3.09-rp	1-oxa-2-oxo-3-hydroxycycloheptane	130.063	3.09	C6H10O3	#N/A	Metabolic pathways;Biosynthesis of secondary metabolites;Microbial metabolism in diverse environments;Degradation of aromatic compounds;Biosynthesis of amino acids;2-Oxocarboxylic acid metabolism;Other	rp
FAUX	1-oxa-2-oxo-3-hydroxycycloheptane@3.492-rp	1-oxa-2-oxo-3-hydroxycycloheptane	130.063	3.492	C6H10O3	#N/A	Metabolic pathways;Biosynthesis of secondary metabolites;Microbial metabolism in diverse environments;Degradation of aromatic compounds;Biosynthesis of amino acids;2-Oxocarboxylic acid metabolism;Other	rp
FAUX	iminodiacetate@0.969-rp	iminodiacetate	131.023	0.969	C4H5NO4	2590793	Metabolic pathways;Other	rp
FAUX	2-amino-4-oxopentanoicacid@1.002-rp	2-amino-4-oxopentanoicacid	131.058	1.002	C5H9NO3	#N/A	Metabolic pathways;Biosynthesis of secondary metabolites;Microbial metabolism in diverse environments;Biosynthesis of plant secondary metabolites;Biosynthesis of amino acids;ABC transporters;Arginine and proline metabolism;Other	rp
FAUX	2-amino-4-oxopentanoicacid@1.65-rp	2-amino-4-oxopentanoicacid	131.058	1.65	C5H9NO3	#N/A	Metabolic pathways;Biosynthesis of secondary metabolites;Microbial metabolism in diverse environments;Biosynthesis of plant secondary metabolites;Biosynthesis of amino acids;ABC transporters;Arginine and proline metabolism;Other	rp
FAUX	Creatine@1.056-rp	Creatine	131.069	1.056	C4H9N3O2	566	Metabolic pathways;Arginine and proline metabolism;Other	rp
FAUX	Skatole@3.057-rp	Skatole	131.073	3.057	C9H9N	6480	Other	rp
FAUX	Alloisoleucine@1.309-rp	Alloisoleucine	131.095	1.309	C6H13NO2	#N/A	Metabolic pathways;Biosynthesis of secondary metabolites;Microbial metabolism in diverse environments;Biosynthesis of plant secondary metabolites;Biosynthesis of amino acids;2-Oxocarboxylic acid metabolism;ABC transporters;Central carbon metabolism in cancer;Biosynthesis of alkaloids derived from ornithine, lysine and nicotinic acid;Other	rp
FAUX	3-Methylsulfolene@1.215-rp	3-Methylsulfolene	132.024	1.215	C5H8O2S	64103	#N/A	rp
FAUX	2-acetolacticacid@8.937-rp	2-acetolacticacid	132.042	8.937	C5H8O4	#N/A	Metabolic pathways;Biosynthesis of secondary metabolites;Microbial metabolism in diverse environments;Degradation of aromatic compounds;Biosynthesis of amino acids;2-Oxocarboxylic acid metabolism;Phenylalanine metabolism;Other	rp
FAUX	2-acetolacticacid@2.194-rp	2-acetolacticacid	132.042	2.194	C5H8O4	#N/A	Metabolic pathways;Biosynthesis of secondary metabolites;Microbial metabolism in diverse environments;Degradation of aromatic compounds;Biosynthesis of amino acids;2-Oxocarboxylic acid metabolism;Phenylalanine metabolism;Other	rp
FAUX	132.04476@5.118-rp	#N/A	132.045	5.118	C4H9N2OP	#N/A	#N/A	rp
FAUX	3-ureidopropionicacid@0.987-rp	3-ureidopropionicacid	132.053	0.987	C4H8N2O3	#N/A	Metabolic pathways;Biosynthesis of secondary metabolites;Biosynthesis of plant secondary metabolites;Biosynthesis of amino acids;Pyrimidine metabolism;Central carbon metabolism in cancer;Arginine and proline metabolism;Other	rp
FAUX	3-ureidopropionicacid@1.408-rp	3-ureidopropionicacid	132.053	1.408	C4H8N2O3	#N/A	Metabolic pathways;Biosynthesis of secondary metabolites;Biosynthesis of plant secondary metabolites;Biosynthesis of amino acids;Pyrimidine metabolism;Central carbon metabolism in cancer;Arginine and proline metabolism;Other	rp
FAUX	2-hydroxycaproicacid@4.994-rp	2-hydroxycaproicacid	132.079	4.994	C6H12O3	#N/A	Microbial metabolism in diverse environments;Degradation of aromatic compounds;Other	rp
FAUX	2-hydroxycaproicacid@5.272-rp	2-hydroxycaproicacid	132.079	5.272	C6H12O3	#N/A	Microbial metabolism in diverse environments;Degradation of aromatic compounds;Other	rp
FAUX	2,4-diaminopentanoicacid@1.029-rp	2,4-diaminopentanoicacid	132.09	1.029	C5H12N2O2	#N/A	Metabolic pathways;Biosynthesis of secondary metabolites;Biosynthesis of plant secondary metabolites;Biosynthesis of amino acids;2-Oxocarboxylic acid metabolism;ABC transporters;Biosynthesis of alkaloids derived from ornithine, lysine and nicotinic acid;Arginine and proline metabolism;Other	rp
FAUX	2,4-diaminopentanoicacid@0.883-rp	2,4-diaminopentanoicacid	132.09	0.883	C5H12N2O2	#N/A	Metabolic pathways;Biosynthesis of secondary metabolites;Biosynthesis of plant secondary metabolites;Biosynthesis of amino acids;2-Oxocarboxylic acid metabolism;ABC transporters;Biosynthesis of alkaloids derived from ornithine, lysine and nicotinic acid;Arginine and proline metabolism;Other	rp
FAUX	4-hydroxyindole@5.113-rp	4-hydroxyindole	133.053	5.113	C8H7NO	#N/A	Metabolic pathways;Biosynthesis of secondary metabolites;Other	rp
FAUX	133.95351@1.097-rp	#N/A	133.954	1.097	#N/A	#N/A	#N/A	rp
FAUX	133.97472@0.956-rp	#N/A	133.975	0.956	#N/A	#N/A	#N/A	rp
FAUX	3-dehydrothreonicacid@1.203-rp	3-dehydrothreonicacid	134.021	1.203	C4H6O5	#N/A	Metabolic pathways;Biosynthesis of secondary metabolites;Microbial metabolism in diverse environments;Biosynthesis of plant secondary metabolites;Biosynthesis of alkaloids derived from shikimate pathway;Biosynthesis of phenylpropanoids;Biosynthesis of plant hormones;Central carbon metabolism in cancer;Biosynthesis of alkaloids derived from ornithine, lysine and nicotinic acid;Other	rp
FAUX	2,3-dihydroxy-3-methylbutanoicacid@1.41-rp	2,3-dihydroxy-3-methylbutanoicacid	134.058	1.41	C5H10O4	#N/A	Metabolic pathways;Biosynthesis of secondary metabolites;Biosynthesis of amino acids;2-Oxocarboxylic acid metabolism;Other	rp
FAUX	Chavicol@9.848-rp	Chavicol	134.073	9.848	C9H10O	#N/A	Biosynthesis of secondary metabolites;Biosynthesis of plant secondary metabolites;Phenylpropanoid biosynthesis	rp
FAUX	135.00672@2.393-rp	#N/A	135.007	2.393	C5HN3O2	#N/A	#N/A	rp
FAUX	135.04069@1.034-rp	#N/A	135.041	1.034	#N/A	#N/A	#N/A	rp
FAUX	Adenine@4.297-rp	Adenine	135.054	4.297	C5H5N5	185	Metabolic pathways;Other	rp
FAUX	2-phenylacetamide@1.447-rp	2-phenylacetamide	135.068	1.447	C8H9NO	#N/A	Metabolic pathways;Biosynthesis of secondary metabolites;Microbial metabolism in diverse environments;2-Oxocarboxylic acid metabolism;Phenylalanine metabolism;Other	rp
FAUX	2-phenylacetamide@5.981-rp	2-phenylacetamide	135.068	5.981	C8H9NO	#N/A	Metabolic pathways;Biosynthesis of secondary metabolites;Microbial metabolism in diverse environments;2-Oxocarboxylic acid metabolism;Phenylalanine metabolism;Other	rp
FAUX	135.93281@0.937-rp	#N/A	135.933	0.937	#N/A	#N/A	#N/A	rp
FAUX	Erythronicacid@1.072-rp	Erythronicacid	136.037	1.072	C4H8O5	#N/A	Metabolic pathways;Other	rp
FAUX	Erythronicacid@1.37-rp	Erythronicacid	136.037	1.37	C4H8O5	#N/A	Metabolic pathways;Other	rp
FAUX	Hypoxanthine@2.397-rp	Hypoxanthine	136.038	2.397	C5H4N4O	#N/A	Metabolic pathways;Other	rp
FAUX	1-methylnicotinamide@1.021-rp	1-methylnicotinamide	136.064	1.021	C7H8N2O	#N/A	#N/A	rp
FAUX	137.03543@2.44-rp	#N/A	137.035	2.44	C2H8N3O2P	#N/A	#N/A	rp
FAUX	137.04158@2.448-rp	#N/A	137.042	2.448	#N/A	#N/A	#N/A	rp
FAUX	2-pyridylaceticacid@1.199-rp	2-pyridylaceticacid	137.048	1.199	C7H7NO2	#N/A	Metabolic pathways;Biosynthesis of secondary metabolites;Microbial metabolism in diverse environments;Biosynthesis of plant secondary metabolites;Degradation of aromatic compounds;Biosynthesis of amino acids;Biosynthesis of alkaloids derived from shikimate pathway;Biosynthesis of phenylpropanoids;Biosynthesis of plant hormones;Other	rp
FAUX	2-pyridylaceticacid@1.417-rp	2-pyridylaceticacid	137.048	1.417	C7H7NO2	#N/A	Metabolic pathways;Biosynthesis of secondary metabolites;Microbial metabolism in diverse environments;Biosynthesis of plant secondary metabolites;Degradation of aromatic compounds;Biosynthesis of amino acids;Biosynthesis of alkaloids derived from shikimate pathway;Biosynthesis of phenylpropanoids;Biosynthesis of plant hormones;Other	rp
FAUX	2-aminonicotinicacid@1.426-rp	2-aminonicotinicacid	138.043	1.426	C6H6N2O2	#N/A	Metabolic pathways;Histidine metabolism	rp
FAUX	2-aminonicotinicacid@1.778-rp	2-aminonicotinicacid	138.043	1.778	C6H6N2O2	#N/A	Metabolic pathways;Histidine metabolism	rp
FAUX	3,6-nonadienal@11.064-rp	3,6-nonadienal	138.104	11.064	C9H14O	#N/A	Biosynthesis of secondary metabolites;alpha-Linolenic acid metabolism	rp
FAUX	139.06077@1.071-rp	#N/A	139.061	1.071	#N/A	#N/A	#N/A	rp
FAUX	Deferiprone@6.496-rp	Deferiprone	139.063	6.496	C7H9NO2	2866	#N/A	rp
FAUX	MalonylChloride@0.803-rp	MalonylChloride	139.944	0.803	C3H2Cl2O2	66875	#N/A	rp
FAUX	2,4,5-trihydroxytoluene@3.714-rp	2,4,5-trihydroxytoluene	140.047	3.714	C7H8O3	63923	Microbial metabolism in diverse environments;Other	rp
FAUX	1,2-dihydroethylcatechol@7.557-rp	1,2-dihydroethylcatechol	140.084	7.557	C8H12O2	#N/A	Metabolic pathways;Microbial metabolism in diverse environments;Degradation of aromatic compounds;Other	rp
FAUX	1,2-dihydroethylcatechol@8.114-rp	1,2-dihydroethylcatechol	140.084	8.114	C8H12O2	#N/A	Metabolic pathways;Microbial metabolism in diverse environments;Degradation of aromatic compounds;Other	rp
FAUX	RA8509050@11.063-rp	RA8509050	140.12	11.063	C9H16O	4446456	#N/A	rp
FAUX	141.02754@0.836-rp	#N/A	141.028	0.836	C2H7NO6	#N/A	#N/A	rp
FAUX	141.04004@0.967-rp	#N/A	141.04	0.967	C2H3N7O	#N/A	#N/A	rp
FAUX	Pyrrolo(2,1,5-cd)indolizine@3.057-rp	Pyrrolo(2,1,5-cd)indolizine	141.058	3.057	C10H7N	119810	#N/A	rp
FAUX	141.94062@0.943-rp	#N/A	141.941	0.943	CH4O2P2S	#N/A	#N/A	rp
FAUX	142.01151@0.848-rp	#N/A	142.012	0.848	C2H6O7	#N/A	#N/A	rp
FAUX	142.02411@0.913-rp	#N/A	142.024	0.913	#N/A	#N/A	#N/A	rp
FAUX	1-Propene-1,1,3,3-tetracarbonitrile@0.835-rp	1-Propene-1,1,3,3-tetracarbonitrile	142.028	0.835	C7H2N4	183077	#N/A	rp
FAUX	508472@0.832-rp	508472	142.029	0.832	C6H7ClN2	6993	#N/A	rp
FAUX	2-Oxocyclohexanecarboxylicacid@10.824-rp	2-Oxocyclohexanecarboxylicacid	142.063	10.824	C7H10O3	8117783	#N/A	rp
FAUX	Ectoine@1.136-rp	Ectoine	142.074	1.136	C6H10N2O2	670	Metabolic pathways;Microbial metabolism in diverse environments;Other	rp
FAUX	2-en-valproicacid@9.845-rp	2-en-valproicacid	142.099	9.845	C8H14O2	#N/A	Biosynthesis of secondary metabolites;alpha-Linolenic acid metabolism;Other	rp
FAUX	2-en-valproicacid@6.495-rp	2-en-valproicacid	142.099	6.495	C8H14O2	#N/A	Biosynthesis of secondary metabolites;alpha-Linolenic acid metabolism;Other	rp
FAUX	2-en-valproicacid@7.556-rp	2-en-valproicacid	142.099	7.556	C8H14O2	#N/A	Biosynthesis of secondary metabolites;alpha-Linolenic acid metabolism;Other	rp
FAUX	2-en-valproicacid@8.113-rp	2-en-valproicacid	142.099	8.113	C8H14O2	#N/A	Biosynthesis of secondary metabolites;alpha-Linolenic acid metabolism;Other	rp
FAUX	142.54434@9.844-rp	#N/A	142.544	9.844	#N/A	#N/A	#N/A	rp
FAUX	142.87526@1.149-rp	#N/A	142.875	1.149	#N/A	#N/A	#N/A	rp
FAUX	142.87528@1.026-rp	#N/A	142.875	1.026	#N/A	#N/A	#N/A	rp
FAUX	143.02503@0.837-rp	#N/A	143.025	0.837	C4H6N3OP	#N/A	#N/A	rp
FAUX	1-naphthylamine@4.628-rp	1-naphthylamine	143.073	4.628	C10H9N	#N/A	Other	rp
FAUX	1-naphthylamine@3.057-rp	1-naphthylamine	143.073	3.057	C10H9N	#N/A	Other	rp
FAUX	Homocycloleucine@1.227-rp	Homocycloleucine	143.094	1.227	C7H13NO2	1325	ABC transporters	rp
FAUX	7-oxoheptanoicacid@7.639-rp	7-oxoheptanoicacid	144.079	7.639	C7H12O3	#N/A	Metabolic pathways;Microbial metabolism in diverse environments;Other	rp
FAUX	Valproicacid@9.844-rp	Valproicacid	144.115	9.844	C8H16O2	3009	Metabolic pathways;Biosynthesis of plant secondary metabolites;Other	rp
FAUX	144.87234@1.144-rp	#N/A	144.872	1.144	#N/A	#N/A	#N/A	rp
FAUX	144.87237@1.027-rp	#N/A	144.872	1.027	#N/A	#N/A	#N/A	rp
FAUX	8-hydroxyquinoline@3.057-rp	8-hydroxyquinoline	145.053	3.057	C9H7NO	#N/A	#N/A	rp
FAUX	8-hydroxyquinoline@7.573-rp	8-hydroxyquinoline	145.053	7.573	C9H7NO	#N/A	#N/A	rp
FAUX	8-hydroxyquinoline@9.605-rp	8-hydroxyquinoline	145.053	9.605	C9H7NO	#N/A	#N/A	rp
FAUX	2-amino-5-oxohexanoicacid@2.337-rp	2-amino-5-oxohexanoicacid	145.074	2.337	C6H11NO3	#N/A	Metabolic pathways;Biosynthesis of secondary metabolites;Biosynthesis of plant secondary metabolites;Biosynthesis of amino acids;Biosynthesis of alkaloids derived from ornithine, lysine and nicotinic acid;Arginine and proline metabolism;Other	rp
FAUX	4-guanidinobutanoicacid@1.176-rp	4-guanidinobutanoicacid	145.085	1.176	C5H11N3O2	#N/A	Metabolic pathways;Arginine and proline metabolism	rp
FAUX	3-amino-4-methylhexanoicacid@1.07-rp	3-amino-4-methylhexanoicacid	145.11	1.07	C7H15NO2	#N/A	#N/A	rp
FAUX	1,4-dichlorobenzene@11.096-rp	1,4-dichlorobenzene	145.969	11.096	C6H4Cl2	#N/A	Metabolic pathways;Microbial metabolism in diverse environments;Degradation of aromatic compounds;Other	rp
FAUX	2-oxoglutaricacid@1.255-rp	2-oxoglutaricacid	146.021	1.255	C5H6O5	#N/A	Metabolic pathways;Biosynthesis of secondary metabolites;Microbial metabolism in diverse environments;Biosynthesis of plant secondary metabolites;Biosynthesis of amino acids;2-Oxocarboxylic acid metabolism;Biosynthesis of alkaloids derived from shikimate pathway;Biosynthesis of phenylpropanoids;Biosynthesis of plant hormones;Histidine metabolism;Central carbon metabolism in cancer;Biosynthesis of…	rp
FAUX	2-oxoglutaricacid@1.391-rp	2-oxoglutaricacid	146.022	1.391	C5H6O5	#N/A	Metabolic pathways;Biosynthesis of secondary metabolites;Microbial metabolism in diverse environments;Biosynthesis of plant secondary metabolites;Biosynthesis of amino acids;2-Oxocarboxylic acid metabolism;Biosynthesis of alkaloids derived from shikimate pathway;Biosynthesis of phenylpropanoids;Biosynthesis of plant hormones;Histidine metabolism;Central carbon metabolism in cancer;Biosynthesis of…	rp
FAUX	2,2-dimethylsuccinicacid@9.837-rp	2,2-dimethylsuccinicacid	146.058	9.837	C6H10O4	#N/A	Metabolic pathways;Biosynthesis of secondary metabolites;Microbial metabolism in diverse environments;Degradation of aromatic compounds;Biosynthesis of amino acids;2-Oxocarboxylic acid metabolism;Other	rp
FAUX	2,2-dimethylsuccinicacid@3.889-rp	2,2-dimethylsuccinicacid	146.058	3.889	C6H10O4	#N/A	Metabolic pathways;Biosynthesis of secondary metabolites;Microbial metabolism in diverse environments;Degradation of aromatic compounds;Biosynthesis of amino acids;2-Oxocarboxylic acid metabolism;Other	rp
FAUX	Alanylglycine@0.997-rp	Alanylglycine	146.069	0.997	C5H10N2O3	#N/A	Metabolic pathways;Microbial metabolism in diverse environments;Biosynthesis of plant secondary metabolites;Biosynthesis of amino acids;ABC transporters;Histidine metabolism;Pyrimidine metabolism;Central carbon metabolism in cancer;Other	rp
FAUX	n-Butyllactate@6.901-rp	n-Butyllactate	146.094	6.901	C7H14O3	8409	#N/A	rp
FAUX	3,5-diaminohexanoicacid@0.888-rp	3,5-diaminohexanoicacid	146.105	0.888	C6H14N2O2	#N/A	Metabolic pathways;Biosynthesis of secondary metabolites;Microbial metabolism in diverse environments;Biosynthesis of plant secondary metabolites;Biosynthesis of amino acids;2-Oxocarboxylic acid metabolism;ABC transporters;Biosynthesis of alkaloids derived from ornithine, lysine and nicotinic acid;Other	rp
FAUX	146.99641@0.974-rp	#N/A	146.996	0.974	#N/A	#N/A	#N/A	rp
FAUX	2-oxo-4-hydroxy-5-aminovalericacid@1.003-rp	2-oxo-4-hydroxy-5-aminovalericacid	147.053	1.003	C5H9NO4	#N/A	Metabolic pathways;Biosynthesis of secondary metabolites;Microbial metabolism in diverse environments;Biosynthesis of plant secondary metabolites;Biosynthesis of amino acids;2-Oxocarboxylic acid metabolism;ABC transporters;Histidine metabolism;Central carbon metabolism in cancer;Biosynthesis of alkaloids derived from ornithine, lysine and nicotinic acid;Arginine and proline metabolism;Other	rp
FAUX	2-oxo-4-hydroxy-5-aminovalericacid@1.266-rp	2-oxo-4-hydroxy-5-aminovalericacid	147.053	1.266	C5H9NO4	#N/A	Metabolic pathways;Biosynthesis of secondary metabolites;Microbial metabolism in diverse environments;Biosynthesis of plant secondary metabolites;Biosynthesis of amino acids;2-Oxocarboxylic acid metabolism;ABC transporters;Histidine metabolism;Central carbon metabolism in cancer;Biosynthesis of alkaloids derived from ornithine, lysine and nicotinic acid;Arginine and proline metabolism;Other	rp
FAUX	Indole-3-methanol@7.579-rp	Indole-3-methanol	147.068	7.579	C9H9NO	#N/A	#N/A	rp
FAUX	N-hydroxyisoleucine@1.298-rp	N-hydroxyisoleucine	147.089	1.298	C6H13NO3	#N/A	Biosynthesis of secondary metabolites;Other	rp
FAUX	N-hydroxyisoleucine@1.136-rp	N-hydroxyisoleucine	147.089	1.136	C6H13NO3	#N/A	Biosynthesis of secondary metabolites;Other	rp
FAUX	147.99028@1.25-rp	#N/A	147.99	1.25	CHClN6O	#N/A	#N/A	rp
FAUX	2-dehydro-3-deoxyarabinonicacid@1.422-rp	2-dehydro-3-deoxyarabinonicacid	148.037	1.422	C5H8O5	#N/A	Metabolic pathways;Microbial metabolism in diverse environments;Biosynthesis of amino acids;2-Oxocarboxylic acid metabolism;Other	rp
FAUX	3-hydroxy-1-indanone@1.895-rp	3-hydroxy-1-indanone	148.052	1.895	C9H8O2	#N/A	Metabolic pathways;Biosynthesis of secondary metabolites;Microbial metabolism in diverse environments;Biosynthesis of plant secondary metabolites;Degradation of aromatic compounds;Biosynthesis of alkaloids derived from shikimate pathway;Phenylalanine metabolism;Biosynthesis of phenylpropanoids;Biosynthesis of plant hormones;Phenylpropanoid biosynthesis;Other	rp
FAUX	149.00627@0.969-rp	#N/A	149.006	0.969	C4H8NOPS	#N/A	#N/A	rp
FAUX	Methionine@1.207-rp	Methionine	149.051	1.207	C5H11NO2S	#N/A	Metabolic pathways;Biosynthesis of secondary metabolites;Biosynthesis of plant secondary metabolites;Biosynthesis of amino acids;2-Oxocarboxylic acid metabolism;ABC transporters;Biosynthesis of plant hormones;Central carbon metabolism in cancer;Other	rp
FAUX	150.04029@0.985-rp	#N/A	150.04	0.985	C3H2N8	#N/A	#N/A	rp
FAUX	Arabinose@1.099-rp	Arabinose	150.053	1.099	C5H10O5	59687	Metabolic pathways;ABC transporters;Other	rp
FAUX	3-methoxyacetophenone@7.557-rp	3-methoxyacetophenone	150.068	7.557	C9H10O2	#N/A	Metabolic pathways;Biosynthesis of secondary metabolites;Microbial metabolism in diverse environments;Degradation of aromatic compounds;Biosynthesis of alkaloids derived from shikimate pathway;Phenylalanine metabolism;Biosynthesis of phenylpropanoids;Phenylpropanoid biosynthesis;Other	rp
FAUX	3-methoxyacetophenone@8.114-rp	3-methoxyacetophenone	150.068	8.114	C9H10O2	#N/A	Metabolic pathways;Biosynthesis of secondary metabolites;Microbial metabolism in diverse environments;Degradation of aromatic compounds;Biosynthesis of alkaloids derived from shikimate pathway;Phenylalanine metabolism;Biosynthesis of phenylpropanoids;Phenylpropanoid biosynthesis;Other	rp
FAUX	3-methoxyacetophenone@10.523-rp	3-methoxyacetophenone	150.068	10.523	C9H10O2	#N/A	Metabolic pathways;Biosynthesis of secondary metabolites;Microbial metabolism in diverse environments;Degradation of aromatic compounds;Biosynthesis of alkaloids derived from shikimate pathway;Phenylalanine metabolism;Biosynthesis of phenylpropanoids;Phenylpropanoid biosynthesis;Other	rp
FAUX	151.00161@1.755-rp	#N/A	151.002	1.755	C5HN3O3	#N/A	#N/A	rp
FAUX	Guanine@2.616-rp	Guanine	151.049	2.616	C5H5N5O	744	Metabolic pathways;Other	rp
FAUX	2-amino-3-methylbenzoicacid@4.98-rp	2-amino-3-methylbenzoicacid	151.063	4.98	C8H9NO2	#N/A	Metabolic pathways;Biosynthesis of secondary metabolites;Microbial metabolism in diverse environments;2-Oxocarboxylic acid metabolism;Biosynthesis of alkaloids derived from shikimate pathway;Other	rp
FAUX	2-amino-3-methylbenzoicacid@1.45-rp	2-amino-3-methylbenzoicacid	151.063	1.45	C8H9NO2	#N/A	Metabolic pathways;Biosynthesis of secondary metabolites;Microbial metabolism in diverse environments;2-Oxocarboxylic acid metabolism;Biosynthesis of alkaloids derived from shikimate pathway;Other	rp
FAUX	151.5496@9.844-rp	#N/A	151.55	9.844	#N/A	#N/A	#N/A	rp
FAUX	151.89382@0.985-rp	#N/A	151.894	0.985	#N/A	#N/A	#N/A	rp
FAUX	152.03328@3.246-rp	#N/A	152.033	3.246	C5H12OS2	#N/A	Metabolic pathways;Biosynthesis of secondary metabolites;Microbial metabolism in diverse environments;Biosynthesis of plant secondary metabolites;Other	rp
FAUX	Alloxanthine@2.391-rp	Alloxanthine	152.033	2.391	C5H4N4O2	#N/A	Metabolic pathways;Biosynthesis of secondary metabolites;Microbial metabolism in diverse environments;Biosynthesis of plant secondary metabolites;Other	rp
FAUX	2-amino-4-nitrotoluene@3.551-rp	2-amino-4-nitrotoluene	152.058	3.551	C7H8N2O2	#N/A	Metabolic pathways;Microbial metabolism in diverse environments;Other	rp
FAUX	2-amino-4-nitrotoluene@4.4-rp	2-amino-4-nitrotoluene	152.058	4.4	C7H8N2O2	#N/A	Metabolic pathways;Microbial metabolism in diverse environments;Other	rp
FAUX	152.07699@0.97-rp	#N/A	152.077	0.97	#N/A	#N/A	#N/A	rp
FAUX	4-ethylguaiacol@9.845-rp	4-ethylguaiacol	152.084	9.845	C9H12O2	#N/A	#N/A	rp
FAUX	152.11323@0.917-rp	#N/A	152.113	0.917	#N/A	#N/A	#N/A	rp
FAUX	2-methyl-5-isopropylhexadienal@12.165-rp	2-methyl-5-isopropylhexadienal	152.12	12.165	C10H16O	#N/A	Biosynthesis of secondary metabolites;Degradation of aromatic compounds;Other	rp
FAUX	153.01723@2.392-rp	#N/A	153.017	2.392	C5H3N3O3	#N/A	#N/A	rp
FAUX	3-hydroxy-2-methylpyridine-5-carboxylicacid@4.395-rp	3-hydroxy-2-methylpyridine-5-carboxylicacid	153.042	4.395	C7H7NO3	#N/A	Metabolic pathways;Biosynthesis of secondary metabolites;Microbial metabolism in diverse environments;Other	rp
FAUX	153.05562@1.097-rp	#N/A	153.056	1.097	C5H12ClNO2	#N/A	Other	rp
FAUX	153.89091@0.985-rp	#N/A	153.891	0.985	#N/A	#N/A	#N/A	rp
FAUX	Propionylphosphate@1.089-rp	Propionylphosphate	154.003	1.089	C3H7O5P	21137685	Metabolic pathways;Other	rp
FAUX	154.0355@0.967-rp	#N/A	154.036	0.967	C2H2N8O	#N/A	#N/A	rp
FAUX	154.05226@9.845-rp	#N/A	154.052	9.845	#N/A	#N/A	#N/A	rp
FAUX	Hydroxytyrosol@6.359-rp	Hydroxytyrosol	154.063	6.359	C8H10O3	74680	Microbial metabolism in diverse environments;Other	rp
FAUX	154.07158@0.915-rp	#N/A	154.072	0.915	C3H6N8	#N/A	#N/A	rp
FAUX	N,N?-Methylenebisacrylamide@2.634-rp	N,N?-Methylenebisacrylamide	154.074	2.634	C7H10N2O2	7750	#N/A	rp
FAUX	154.09812@0.929-rp	#N/A	154.098	0.929	#N/A	#N/A	#N/A	rp
FAUX	1,8-cineole@12.165-rp	1,8-cineole	154.136	12.165	C10H18O	#N/A	Metabolic pathways;Biosynthesis of secondary metabolites;Biosynthesis of plant secondary metabolites;Degradation of aromatic compounds;Other	rp
FAUX	Histidine@0.96-rp	Histidine	155.069	0.96	C6H9N3O2	#N/A	Metabolic pathways;Biosynthesis of secondary metabolites;Biosynthesis of plant secondary metabolites;Biosynthesis of amino acids;ABC transporters;Histidine metabolism;Central carbon metabolism in cancer;Other	rp
FAUX	155.93544@1.071-rp	#N/A	155.935	1.071	C5H2P2S	#N/A	#N/A	rp
FAUX	155.97458@1.281-rp	#N/A	155.975	1.281	C2H6O4P2	#N/A	#N/A	rp
FAUX	2,5-Furandicarboxylicacid@1.395-rp	2,5-Furandicarboxylicacid	156.006	1.395	C6H4O5	69178	Microbial metabolism in diverse environments;Other	rp
FAUX	Oroticacid@1.447-rp	Oroticacid	156.017	1.447	C5H4N2O4	942	Metabolic pathways;Pyrimidine metabolism	rp
FAUX	1-carboxy-2-(1H-imidazol-4-yl)ethanaminium@9.84-rp	1-carboxy-2-(1H-imidazol-4-yl)ethanaminium	156.077	9.84	C6H9N3O2	2885386	#N/A	rp
FAUX	4-nonanolide@13.697-rp	4-nonanolide	156.115	13.697	C9H16O2	#N/A	Other	rp
FAUX	AMIDINOPROLINE@0.975-rp	AMIDINOPROLINE	157.085	0.975	C6H11N3O2	9818706	#N/A	rp
FAUX	tranexamicacid@1.445-rp	tranexamicacid	157.11	1.445	C8H15NO2	10482000	#N/A	rp
FAUX	157.99798@0.923-rp	#N/A	157.998	0.923	C2H7O6P	#N/A	#N/A	rp
FAUX	Allantoin@1.101-rp	Allantoin	158.044	1.101	C4H6N4O3	199	Metabolic pathways;Microbial metabolism in diverse environments;Other	rp
FAUX	2-isopropylmaleicacid@3.713-rp	2-isopropylmaleicacid	158.058	3.713	C7H10O4	4444164	Biosynthesis of secondary metabolites;2-Oxocarboxylic acid metabolism;Other	rp
FAUX	2-isopropylmaleicacid@8.488-rp	2-isopropylmaleicacid	158.058	8.488	C7H10O4	4444164	Biosynthesis of secondary metabolites;2-Oxocarboxylic acid metabolism;Other	rp
FAUX	1-benzylimidazole@8.972-rp	1-benzylimidazole	158.084	8.972	C10H10N2	70309	#N/A	rp
FAUX	6-methoxyquinoline@1.859-rp	6-methoxyquinoline	159.068	1.859	C10H9NO	#N/A	Metabolic pathways;Biosynthesis of secondary metabolites;Other	rp
FAUX	6-methoxyquinoline@3.054-rp	6-methoxyquinoline	159.068	3.054	C10H9NO	#N/A	Metabolic pathways;Biosynthesis of secondary metabolites;Other	rp
FAUX	3-dehydrocarnitine@4.047-rp	3-dehydrocarnitine	159.089	4.047	C7H13NO3	5360148	Metabolic pathways;Other	rp
FAUX	Pregabalin@1.214-rp	Pregabalin	159.126	1.214	C8H17NO2	4589156	#N/A	rp
FAUX	160.02198@0.841-rp	#N/A	160.022	0.841	C5H9N2PS	#N/A	#N/A	rp
FAUX	2-formylglutaricacid@1.555-rp	2-formylglutaricacid	160.037	1.555	C6H8O5	15081742	Metabolic pathways;Biosynthesis of secondary metabolites;Microbial metabolism in diverse environments;Degradation of aromatic compounds;Biosynthesis of amino acids;2-Oxocarboxylic acid metabolism;Other	rp
FAUX	2,2-dimethylglutaricacid@10.819-rp	2,2-dimethylglutaricacid	160.073	10.819	C7H12O4	#N/A	Metabolic pathways;Other	rp
FAUX	2,2-dimethylglutaricacid@6.707-rp	2,2-dimethylglutaricacid	160.074	6.707	C7H12O4	#N/A	Metabolic pathways;Other	rp
FAUX	2,2-dimethylglutaricacid@8.712-rp	2,2-dimethylglutaricacid	160.074	8.712	C7H12O4	#N/A	Metabolic pathways;Other	rp
FAUX	Anatabine@3.059-rp	Anatabine	160.1	3.059	C10H12N2	229558	Metabolic pathways;Biosynthesis of secondary metabolites;Microbial metabolism in diverse environments;Biosynthesis of plant secondary metabolites;Biosynthesis of alkaloids derived from shikimate pathway;Biosynthesis of alkaloids derived from ornithine, lysine and nicotinic acid;Other	rp
FAUX	3-hydroxyvalproicacid@8.706-rp	3-hydroxyvalproicacid	160.11	8.706	C8H16O3	#N/A	Other	rp
FAUX	3-hydroxyvalproicacid@9.981-rp	3-hydroxyvalproicacid	160.11	9.981	C8H16O3	#N/A	Other	rp
FAUX	3-hydroxyvalproicacid@8.286-rp	3-hydroxyvalproicacid	160.11	8.286	C8H16O3	#N/A	Other	rp
FAUX	N6-methyllysine@0.94-rp	N6-methyllysine	160.121	0.94	C7H16N2O2	#N/A	#N/A	rp
FAUX	2,4-quinolinediol@6.542-rp	2,4-quinolinediol	161.047	6.542	C9H7NO2	#N/A	Metabolic pathways;Biosynthesis of alkaloids derived from shikimate pathway;Other	rp
FAUX	2-aminoadipicacid@1.068-rp	2-aminoadipicacid	161.069	1.068	C6H11NO4	#N/A	Metabolic pathways;Biosynthesis of secondary metabolites;Microbial metabolism in diverse environments;Biosynthesis of amino acids;2-Oxocarboxylic acid metabolism;Other	rp
FAUX	2-aminoadipicacid@1.447-rp	2-aminoadipicacid	161.069	1.447	C6H11NO4	#N/A	Metabolic pathways;Biosynthesis of secondary metabolites;Microbial metabolism in diverse environments;Biosynthesis of amino acids;2-Oxocarboxylic acid metabolism;Other	rp
FAUX	Carnitine@1.004-rp	Carnitine	161.105	1.004	C7H15NO3	#N/A	Other	rp
FAUX	162.01961@0.841-rp	#N/A	162.02	0.841	C4H7N2O3P	#N/A	#N/A	rp
FAUX	2,3-dimethylmalicacid@1.011-rp	2,3-dimethylmalicacid	162.053	1.011	C6H10O5	#N/A	Metabolic pathways;Biosynthesis of secondary metabolites;Microbial metabolism in diverse environments;Other	rp
FAUX	2,3-dimethylmalicacid@1.712-rp	2,3-dimethylmalicacid	162.053	1.712	C6H10O5	#N/A	Metabolic pathways;Biosynthesis of secondary metabolites;Microbial metabolism in diverse environments;Other	rp
FAUX	162.96939@1.4-rp	#N/A	162.969	1.4	C2H3N3O2P2	#N/A	#N/A	rp
FAUX	163.92259@0.943-rp	#N/A	163.923	0.943	#N/A	#N/A	#N/A	rp
FAUX	1-Nitro-2-(2-nitroethoxy)ethane@0.831-rp	1-Nitro-2-(2-nitroethoxy)ethane	164.043	0.831	C4H8N2O5	28488938	#N/A	rp
FAUX	2-hydroxy-3-phenylpropenoicacid@1.448-rp	2-hydroxy-3-phenylpropenoicacid	164.047	1.448	C9H8O3	#N/A	Metabolic pathways;Biosynthesis of secondary metabolites;Microbial metabolism in diverse environments;Biosynthesis of plant secondary metabolites;Degradation of aromatic compounds;Biosynthesis of amino acids;2-Oxocarboxylic acid metabolism;Phenylalanine metabolism;Biosynthesis of phenylpropanoids;Phenylpropanoid biosynthesis;Other	rp
FAUX	2-hydroxy-3-phenylpropenoicacid@8.724-rp	2-hydroxy-3-phenylpropenoicacid	164.047	8.724	C9H8O3	#N/A	Metabolic pathways;Biosynthesis of secondary metabolites;Microbial metabolism in diverse environments;Biosynthesis of plant secondary metabolites;Degradation of aromatic compounds;Biosynthesis of amino acids;2-Oxocarboxylic acid metabolism;Phenylalanine metabolism;Biosynthesis of phenylpropanoids;Phenylpropanoid biosynthesis;Other	rp
FAUX	MFCD00674100@12.289-rp	MFCD00674100	165.054	12.289	C7H7N3O2	746425	#N/A	rp
FAUX	4-hydroxypyridinyl-butanone@6.777-rp	4-hydroxypyridinyl-butanone	165.079	6.777	C9H11NO2	#N/A	Metabolic pathways;Biosynthesis of secondary metabolites;Biosynthesis of plant secondary metabolites;Biosynthesis of amino acids;2-Oxocarboxylic acid metabolism;Biosynthesis of alkaloids derived from shikimate pathway;Phenylalanine metabolism;ABC transporters;Biosynthesis of phenylpropanoids;Biosynthesis of plant hormones;Central carbon metabolism in cancer;Biosynthesis of alkaloids derived from …	rp
FAUX	4-hydroxypyridinyl-butanone@1.894-rp	4-hydroxypyridinyl-butanone	165.079	1.894	C9H11NO2	#N/A	Metabolic pathways;Biosynthesis of secondary metabolites;Biosynthesis of plant secondary metabolites;Biosynthesis of amino acids;2-Oxocarboxylic acid metabolism;Biosynthesis of alkaloids derived from shikimate pathway;Phenylalanine metabolism;ABC transporters;Biosynthesis of phenylpropanoids;Biosynthesis of plant hormones;Central carbon metabolism in cancer;Biosynthesis of alkaloids derived from …	rp
FAUX	Arabinonicacid@1.047-rp	Arabinonicacid	166.048	1.047	C5H10O6	#N/A	Metabolic pathways;Other	rp
FAUX	2-methoxy-2-phenylaceticacid@7.052-rp	2-methoxy-2-phenylaceticacid	166.063	7.052	C9H10O3	#N/A	Metabolic pathways;Biosynthesis of secondary metabolites;Microbial metabolism in diverse environments;Degradation of aromatic compounds;Phenylalanine metabolism;Biosynthesis of alkaloids derived from ornithine, lysine and nicotinic acid;Phenylpropanoid biosynthesis;Other	rp
FAUX	2-methoxy-2-phenylaceticacid@7.792-rp	2-methoxy-2-phenylaceticacid	166.063	7.792	C9H10O3	#N/A	Metabolic pathways;Biosynthesis of secondary metabolites;Microbial metabolism in diverse environments;Degradation of aromatic compounds;Phenylalanine metabolism;Biosynthesis of alkaloids derived from ornithine, lysine and nicotinic acid;Phenylpropanoid biosynthesis;Other	rp
FAUX	2-methoxy-2-phenylaceticacid@8.162-rp	2-methoxy-2-phenylaceticacid	166.063	8.162	C9H10O3	#N/A	Metabolic pathways;Biosynthesis of secondary metabolites;Microbial metabolism in diverse environments;Degradation of aromatic compounds;Phenylalanine metabolism;Biosynthesis of alkaloids derived from ornithine, lysine and nicotinic acid;Phenylpropanoid biosynthesis;Other	rp
FAUX	2-Mercaptobenzothiazole@10.946-rp	2-Mercaptobenzothiazole	166.986	10.946	C7H5NS2	608157	#N/A	rp
FAUX	166.99937@1-rp	#N/A	166.999	1	C5H2ClN5	#N/A	#N/A	rp
FAUX	acetyltaurine@1.386-rp	acetyltaurine	167.025	1.386	C4H9NO4S	140553	#N/A	rp
FAUX	acetyltaurine@1.248-rp	acetyltaurine	167.025	1.248	C4H9NO4S	140553	#N/A	rp
FAUX	3-methoxyanthranilicacid@1.422-rp	3-methoxyanthranilicacid	167.058	1.422	C8H9NO3	224233	Metabolic pathways;Biosynthesis of secondary metabolites;Microbial metabolism in diverse environments;Other	rp
FAUX	167.8677@0.999-rp	#N/A	167.868	0.999	#N/A	#N/A	#N/A	rp
FAUX	Uricacid@1.755-rp	Uricacid	168.028	1.755	C5H4N4O3	#N/A	Metabolic pathways;Microbial metabolism in diverse environments;Other	rp
FAUX	168.05091@0.97-rp	#N/A	168.051	0.97	C3H12N4S2	#N/A	#N/A	rp
FAUX	DC2810000@7.558-rp	DC2810000	168.078	7.558	C9H12O3	21111723	Metabolic pathways;Other	rp
FAUX	DC2810000@6.487-rp	DC2810000	168.079	6.487	C9H12O3	21111723	Metabolic pathways;Other	rp
FAUX	DC2810000@9.837-rp	DC2810000	168.079	9.837	C9H12O3	21111723	Metabolic pathways;Other	rp
FAUX	168.08721@0.916-rp	#N/A	168.087	0.916	C4H8N8	#N/A	#N/A	rp
FAUX	168.97843@0.972-rp	#N/A	168.978	0.972	C2H4NO6P	#N/A	#N/A	rp
FAUX	168.99496@2.128-rp	#N/A	168.995	2.128	C5H3N3O2S	#N/A	#N/A	rp
FAUX	1-Naphthylisocyanate@3.058-rp	1-Naphthylisocyanate	169.053	3.058	C11H7NO	59958	#N/A	rp
FAUX	1-methylhistidine@0.972-rp	1-methylhistidine	169.085	0.972	C7H11N3O2	#N/A	Metabolic pathways;Histidine metabolism	rp
FAUX	Aceclidine@10.789-rp	Aceclidine	169.11	10.789	C9H15NO2	1902	#N/A	rp
FAUX	Benzylphosphonate@0.928-rp	Benzylphosphonate	170.014	0.928	C7H7O3P	5367266	Metabolic pathways;Microbial metabolism in diverse environments;Histidine metabolism;Other	rp
FAUX	Ethyl2-oxocyclohexanecarboxylate@11.055-rp	Ethyl2-oxocyclohexanecarboxylate	170.094	11.055	C9H14O3	86237	#N/A	rp
FAUX	Ethyl2-oxocyclohexanecarboxylate@6.693-rp	Ethyl2-oxocyclohexanecarboxylate	170.094	6.693	C9H14O3	86237	#N/A	rp
FAUX	Ethyl2-oxocyclohexanecarboxylate@10.99-rp	Ethyl2-oxocyclohexanecarboxylate	170.094	10.99	C9H14O3	86237	#N/A	rp
FAUX	Ethyl2-oxocyclohexanecarboxylate@9.843-rp	Ethyl2-oxocyclohexanecarboxylate	170.094	9.843	C9H14O3	86237	#N/A	rp
FAUX	3,7-dimethylocta-1,6-dienediol@14.987-rp	3,7-dimethylocta-1,6-dienediol	170.131	14.987	C10H18O2	#N/A	Metabolic pathways;Biosynthesis of secondary metabolites;Biosynthesis of alkaloids derived from shikimate pathway;Other	rp
FAUX	XT5075000@7.641-rp	XT5075000	171.035	7.641	C7H9NO2S	6033	#N/A	rp
FAUX	171.4529@1.383-rp	#N/A	171.453	1.383	#N/A	#N/A	#N/A	rp
FAUX	171.56519@11.112-rp	#N/A	171.565	11.112	#N/A	#N/A	#N/A	rp
FAUX	172.03477@1.295-rp	#N/A	172.035	1.295	C3H4N6O3	#N/A	#N/A	rp
FAUX	Diethylfumarate@6.066-rp	Diethylfumarate	172.073	6.066	C8H12O4	553702	#N/A	rp
FAUX	Diethylfumarate@6.346-rp	Diethylfumarate	172.074	6.346	C8H12O4	553702	#N/A	rp
FAUX	9-oxononanoicacid@9.991-rp	9-oxononanoicacid	172.11	9.991	C9H16O3	#N/A	Biosynthesis of secondary metabolites;alpha-Linolenic acid metabolism	rp
FAUX	9-oxononanoicacid@9.834-rp	9-oxononanoicacid	172.11	9.834	C9H16O3	#N/A	Biosynthesis of secondary metabolites;alpha-Linolenic acid metabolism	rp
FAUX	Hexanoylglycine@7.097-rp	Hexanoylglycine	173.105	7.097	C8H15NO3	#N/A	Biosynthesis of alkaloids derived from ornithine, lysine and nicotinic acid;Other	rp
FAUX	Hexanoylglycine@7.718-rp	Hexanoylglycine	173.105	7.718	C8H15NO3	#N/A	Biosynthesis of alkaloids derived from ornithine, lysine and nicotinic acid;Other	rp
FAUX	1-(3-dimethylaminopropyl)-3-ethylurea@1.438-rp	1-(3-dimethylaminopropyl)-3-ethylurea	173.153	1.438	C8H19N3O	3406708	#N/A	rp
FAUX	Phenolsulficacid@3.654-rp	Phenolsulficacid	173.999	3.654	C6H6O4S	#N/A	#N/A	rp
FAUX	cis-Aconiticacid@1.398-rp	cis-Aconiticacid	174.016	1.398	C6H6O6	#N/A	Metabolic pathways;Biosynthesis of secondary metabolites;Microbial metabolism in diverse environments;Biosynthesis of plant secondary metabolites;2-Oxocarboxylic acid metabolism;Biosynthesis of alkaloids derived from shikimate pathway;Biosynthesis of phenylpropanoids;Biosynthesis of plant hormones;Biosynthesis of alkaloids derived from ornithine, lysine and nicotinic acid;Other	rp
FAUX	cis-Aconiticacid@1.896-rp	cis-Aconiticacid	174.016	1.896	C6H6O6	#N/A	Metabolic pathways;Biosynthesis of secondary metabolites;Microbial metabolism in diverse environments;Biosynthesis of plant secondary metabolites;2-Oxocarboxylic acid metabolism;Biosynthesis of alkaloids derived from shikimate pathway;Biosynthesis of phenylpropanoids;Biosynthesis of plant hormones;Biosynthesis of alkaloids derived from ornithine, lysine and nicotinic acid;Other	rp
FAUX	1-Benzyl-1H-phosphole@0.964-rp	1-Benzyl-1H-phosphole	174.059	0.964	C11H11P	35013840	#N/A	rp
FAUX	2-propylglutaricacid@11.836-rp	2-propylglutaricacid	174.089	11.836	C8H14O4	#N/A	Other	rp
FAUX	2-propylglutaricacid@8.463-rp	2-propylglutaricacid	174.089	8.463	C8H14O4	#N/A	Other	rp
FAUX	2-propylglutaricacid@9.876-rp	2-propylglutaricacid	174.089	9.876	C8H14O4	#N/A	Other	rp
FAUX	N-acetylornithine@1.127-rp	N-acetylornithine	174.1	1.127	C7H14N2O3	#N/A	Metabolic pathways;Biosynthesis of secondary metabolites;Biosynthesis of amino acids;2-Oxocarboxylic acid metabolism;Other	rp
FAUX	Arginine@0.972-rp	Arginine	174.111	0.972	C6H14N4O2	#N/A	Metabolic pathways;Biosynthesis of secondary metabolites;Biosynthesis of plant secondary metabolites;Biosynthesis of amino acids;ABC transporters;Central carbon metabolism in cancer;Biosynthesis of alkaloids derived from ornithine, lysine and nicotinic acid;Arginine and proline metabolism;Other	rp
FAUX	9-Hydroxynonanoicacid@9.213-rp	9-Hydroxynonanoicacid	174.126	9.213	C9H18O3	121694	#N/A	rp
FAUX	9-Hydroxynonanoicacid@9.763-rp	9-Hydroxynonanoicacid	174.126	9.763	C9H18O3	121694	#N/A	rp
FAUX	9-Hydroxynonanoicacid@10.127-rp	9-Hydroxynonanoicacid	174.126	10.127	C9H18O3	121694	#N/A	rp
FAUX	9-Hydroxynonanoicacid@10.662-rp	9-Hydroxynonanoicacid	174.126	10.662	C9H18O3	121694	#N/A	rp
FAUX	174.96926@1.272-rp	#N/A	174.969	1.272	C3H3N3O2P2	#N/A	#N/A	rp
FAUX	N-acetylasparticacid@1.433-rp	N-acetylasparticacid	175.048	1.433	C6H9NO5	#N/A	Metabolic pathways;Histidine metabolism;Other	rp
FAUX	Citrulline@1.016-rp	Citrulline	175.096	1.016	C6H13N3O3	#N/A	Metabolic pathways;Biosynthesis of secondary metabolites;Biosynthesis of amino acids;Other	rp
FAUX	2-hydroxy-3-oxoadipicacid@1.387-rp	2-hydroxy-3-oxoadipicacid	176.032	1.387	C6H8O6	388974	Metabolic pathways;Biosynthesis of secondary metabolites;Microbial metabolism in diverse environments;Other	rp
FAUX	2-hydroxy-3-oxoadipicacid@1.246-rp	2-hydroxy-3-oxoadipicacid	176.032	1.246	C6H8O6	388974	Metabolic pathways;Biosynthesis of secondary metabolites;Microbial metabolism in diverse environments;Other	rp
FAUX	177.05122@0.94-rp	#N/A	177.051	0.94	C4H3N9	#N/A	#N/A	rp
FAUX	177.05231@0.935-rp	#N/A	177.052	0.935	C2H8N7OP	#N/A	#N/A	rp
FAUX	iodohypochlorite@1.064-rp	iodohypochlorite	177.868	1.064	ClIO	10266384	#N/A	rp
FAUX	177.90798@0.958-rp	#N/A	177.908	0.958	CH4ClO2PS2	#N/A	#N/A	rp
FAUX	177.99738@1.131-rp	#N/A	177.997	1.131	C4H7N2O2PS	#N/A	#N/A	rp
FAUX	178.03256@0.83-rp	#N/A	178.033	0.83	#N/A	#N/A	#N/A	rp
FAUX	1-keto-inositol@1.139-rp	1-keto-inositol	178.048	1.139	C6H10O6	#N/A	Metabolic pathways;Biosynthesis of secondary metabolites;Microbial metabolism in diverse environments;Other	rp
FAUX	1-keto-inositol@1.032-rp	1-keto-inositol	178.048	1.032	C6H10O6	#N/A	Metabolic pathways;Biosynthesis of secondary metabolites;Microbial metabolism in diverse environments;Other	rp
FAUX	3-succinoylpyridine@5.981-rp	3-succinoylpyridine	179.058	5.981	C9H9NO3	#N/A	Metabolic pathways;Biosynthesis of secondary metabolites;Microbial metabolism in diverse environments;Biosynthesis of alkaloids derived from shikimate pathway;Phenylalanine metabolism;Other	rp
FAUX	179.86526@1.075-rp	#N/A	179.865	1.075	#N/A	#N/A	#N/A	rp
FAUX	179.92766@1.249-rp	#N/A	179.928	1.249	C4HClO4S	#N/A	#N/A	rp
FAUX	Allose@1.017-rp	Allose	180.063	1.017	C6H12O6	#N/A	Metabolic pathways;Biosynthesis of secondary metabolites;Microbial metabolism in diverse environments;Biosynthesis of plant secondary metabolites;Biosynthesis of alkaloids derived from shikimate pathway;ABC transporters;Biosynthesis of phenylpropanoids;Biosynthesis of plant hormones;Central carbon metabolism in cancer;Biosynthesis of alkaloids derived from ornithine, lysine and nicotinic acid;Oth…	rp
FAUX	Coniferylalcohol@13.33-rp	Coniferylalcohol	180.078	13.33	C10H12O3	#N/A	Metabolic pathways;Biosynthesis of secondary metabolites;Biosynthesis of phenylpropanoids;Phenylpropanoid biosynthesis;Other	rp
FAUX	3-BHA@12.164-rp	3-BHA	180.115	12.164	C11H16O2	8145	#N/A	rp
FAUX	Beta-tyrosine@1.45-rp	Beta-tyrosine	181.074	1.45	C9H11NO3	#N/A	Metabolic pathways;Biosynthesis of secondary metabolites;Biosynthesis of plant secondary metabolites;Biosynthesis of amino acids;2-Oxocarboxylic acid metabolism;Biosynthesis of alkaloids derived from shikimate pathway;Phenylalanine metabolism;Central carbon metabolism in cancer;Phenylpropanoid biosynthesis;Other	rp
FAUX	181.10337@0.981-rp	#N/A	181.103	0.981	#N/A	#N/A	#N/A	rp
FAUX	1,2-Benzoxathiine2,2-dioxide@0.873-rp	1,2-Benzoxathiine2,2-dioxide	182.004	0.873	C8H6O3S	250024	#N/A	rp
FAUX	182.05554@6.706-rp	#N/A	182.056	6.706	C5H6N6O2	#N/A	#N/A	rp
FAUX	3,4-dimethoxybenzoicacid@4.38-rp	3,4-dimethoxybenzoicacid	182.058	4.38	C9H10O4	#N/A	Metabolic pathways;Biosynthesis of secondary metabolites;Microbial metabolism in diverse environments;Degradation of aromatic compounds;Phenylalanine metabolism;Other	rp
FAUX	182.97329@1-rp	#N/A	182.973	1	#N/A	#N/A	#N/A	rp
FAUX	183.03799@0.843-rp	#N/A	183.038	0.843	C4H9NO7	#N/A	#N/A	rp
FAUX	Cholinephosphate@1.002-rp	Cholinephosphate	183.066	1.002	C5H14NO4P	#N/A	#N/A	rp
FAUX	5-hydroxyisourate@1.757-rp	5-hydroxyisourate	184.023	1.757	C5H4N4O4	#N/A	Metabolic pathways;Microbial metabolism in diverse environments;Other	rp
FAUX	184.02478@1.015-rp	#N/A	184.025	1.015	C3H9N2O5P	#N/A	#N/A	rp
FAUX	2-hydroxy-6-oxo-7-methylocta-2,4-dienoicacid@4.206-rp	2-hydroxy-6-oxo-7-methylocta-2,4-dienoicacid	184.073	4.206	C9H12O4	#N/A	Metabolic pathways;Microbial metabolism in diverse environments;Degradation of aromatic compounds;Phenylalanine metabolism;Other	rp
FAUX	2-hydroxy-6-oxo-7-methylocta-2,4-dienoicacid@4.644-rp	2-hydroxy-6-oxo-7-methylocta-2,4-dienoicacid	184.073	4.644	C9H12O4	#N/A	Metabolic pathways;Microbial metabolism in diverse environments;Degradation of aromatic compounds;Phenylalanine metabolism;Other	rp
FAUX	Veronal@2.051-rp	Veronal	184.085	2.051	C8H12N2O3	2206	#N/A	rp
FAUX	184.10741@0.929-rp	#N/A	184.107	0.929	C6H12N6O	#N/A	#N/A	rp
FAUX	1,6,6-trimethyl-2,7-dioxabicyclononan-3-one@11.069-rp	1,6,6-trimethyl-2,7-dioxabicyclononan-3-one	184.11	11.069	C10H16O3	#N/A	Metabolic pathways;Biosynthesis of secondary metabolites;Degradation of aromatic compounds;Other	rp
FAUX	10-Undecenoicacid@15.781-rp	10-Undecenoicacid	184.146	15.781	C11H20O2	10771160	#N/A	rp
FAUX	Secnidazole@1.366-rp	Secnidazole	185.08	1.366	C7H11N3O3	64839	#N/A	rp
FAUX	2-methylcyclohexanonethiosemicarbazone@1.224-rp	2-methylcyclohexanonethiosemicarbazone	185.098	1.224	C8H15N3S	21376837	#N/A	rp
FAUX	185.58086@12.825-rp	#N/A	185.581	12.825	#N/A	#N/A	#N/A	rp
FAUX	185.98787@0.928-rp	#N/A	185.988	0.928	#N/A	#N/A	#N/A	rp
FAUX	186.02947@1.071-rp	#N/A	186.029	1.071	C5H11ClO5	#N/A	#N/A	rp
FAUX	186.05038@1.552-rp	#N/A	186.05	1.552	C4H6N6O3	#N/A	#N/A	rp
FAUX	(1R,4S,5S)-4-Methyl-1-(trimethylsilyl)-3,6-dioxabicyclo[3.1.0]hexan-2-one@0.981-rp	(1R,4S,5S)-4-Methyl-1-(trimethylsilyl)-3,6-dioxabicyclo[3.1.0]hexan-2-one	186.071	0.981	C8H14O3Si	9107425	#N/A	rp
FAUX	2-carboxycyclohexylaceticacid@7.661-rp	2-carboxycyclohexylaceticacid	186.089	7.661	C9H14O4	#N/A	Microbial metabolism in diverse environments;Other	rp
FAUX	2-carboxycyclohexylaceticacid@9.838-rp	2-carboxycyclohexylaceticacid	186.089	9.838	C9H14O4	#N/A	Microbial metabolism in diverse environments;Other	rp
FAUX	2-carboxycyclohexylaceticacid@6.506-rp	2-carboxycyclohexylaceticacid	186.089	6.506	C9H14O4	#N/A	Microbial metabolism in diverse environments;Other	rp
FAUX	2-carboxycyclohexylaceticacid@7.554-rp	2-carboxycyclohexylaceticacid	186.089	7.554	C9H14O4	#N/A	Microbial metabolism in diverse environments;Other	rp
FAUX	2-carboxycyclohexylaceticacid@8.114-rp	2-carboxycyclohexylaceticacid	186.089	8.114	C9H14O4	#N/A	Microbial metabolism in diverse environments;Other	rp
FAUX	6-hydroxy-5-isopropenyl-2-methylhexanoicacid@12.81-rp	6-hydroxy-5-isopropenyl-2-methylhexanoicacid	186.126	12.81	C10H18O3	#N/A	Degradation of aromatic compounds;Other	rp
FAUX	Indole-3-acrylicacid@3.058-rp	Indole-3-acrylicacid	187.063	3.058	C11H9NO2	#N/A	Microbial metabolism in diverse environments;Other	rp
FAUX	Indole-3-acrylicacid@8.968-rp	Indole-3-acrylicacid	187.063	8.968	C11H9NO2	#N/A	Microbial metabolism in diverse environments;Other	rp
FAUX	Indole-3-acrylicacid@10.88-rp	Indole-3-acrylicacid	187.063	10.88	C11H9NO2	#N/A	Microbial metabolism in diverse environments;Other	rp
FAUX	Amrinone@0.979-rp	Amrinone	187.075	0.979	C10H9N3O	3570	#N/A	rp
FAUX	Amino-oxononanoate@9.408-rp	Amino-oxononanoate	187.121	9.408	C9H17NO3	#N/A	Metabolic pathways;Other	rp
FAUX	188.00864@1.271-rp	#N/A	188.009	1.271	C3H9O7P	#N/A	#N/A	rp
FAUX	Tetranorbiotin@1.302-rp	Tetranorbiotin	188.026	1.302	C6H8N2O3S	#N/A	Other	rp
FAUX	[(3-Fluorophenyl)hydrazono]malononitrile@1.294-rp	[(3-Fluorophenyl)hydrazono]malononitrile	188.049	1.294	C9H5FN4	3409944	#N/A	rp
FAUX	2-oxosubericacid@2.701-rp	2-oxosubericacid	188.068	2.701	C8H12O5	#N/A	Metabolic pathways;Microbial metabolism in diverse environments;2-Oxocarboxylic acid metabolism;Other	rp
FAUX	2-oxosubericacid@2.576-rp	2-oxosubericacid	188.069	2.576	C8H12O5	#N/A	Metabolic pathways;Microbial metabolism in diverse environments;2-Oxocarboxylic acid metabolism;Other	rp
FAUX	N-acetylglutamine@1.448-rp	N-acetylglutamine	188.08	1.448	C7H12N2O4	#N/A	Biosynthesis of secondary metabolites;Other	rp
FAUX	Azelicacid@12.833-rp	Azelicacid	188.105	12.833	C9H16O4	#N/A	#N/A	rp
FAUX	Azelicacid@11.013-rp	Azelicacid	188.105	11.013	C9H16O4	#N/A	#N/A	rp
FAUX	Azelicacid@9.844-rp	Azelicacid	188.105	9.844	C9H16O4	#N/A	#N/A	rp
FAUX	Azelicacid@6.693-rp	Azelicacid	188.105	6.693	C9H16O4	#N/A	#N/A	rp
FAUX	Glycylleucine@1.269-rp	Glycylleucine	188.116	1.269	C8H16N2O3	#N/A	Metabolic pathways;Other	rp
FAUX	10-hydroxydecanoicacid@12.853-rp	10-hydroxydecanoicacid	188.141	12.853	C10H20O3	#N/A	#N/A	rp
FAUX	10-hydroxydecanoicacid@11.53-rp	10-hydroxydecanoicacid	188.141	11.53	C10H20O3	#N/A	#N/A	rp
FAUX	188.985@1.267-rp	#N/A	188.985	1.267	C4H5N3O2P2	#N/A	#N/A	rp
FAUX	2-Amino-4-sulfophenol@1.879-rp	2-Amino-4-sulfophenol	189.01	1.879	C6H7NO4S	7107	#N/A	rp
FAUX	2-amino-6-oxoheptanedioicacid@1.669-rp	2-amino-6-oxoheptanedioicacid	189.064	1.669	C7H11NO5	#N/A	Metabolic pathways;Biosynthesis of secondary metabolites;Biosynthesis of amino acids;2-Oxocarboxylic acid metabolism;Other	rp
FAUX	2-methylindole-3-aceticacid@10.937-rp	2-methylindole-3-aceticacid	189.079	10.937	C11H11NO2	#N/A	#N/A	rp
FAUX	Octahydro-1,6,7,8-indolizinetetrol@6.36-rp	Octahydro-1,6,7,8-indolizinetetrol	189.1	6.36	C8H15NO4	2494	#N/A	rp
FAUX	189.57589@10.993-rp	#N/A	189.576	10.993	#N/A	#N/A	#N/A	rp
FAUX	189.9356@1.093-rp	#N/A	189.936	1.093	C2H5ClO4P2	#N/A	#N/A	rp
FAUX	2,4-dichlorobenzoicacid@11.092-rp	2,4-dichlorobenzoicacid	189.959	11.092	C7H4Cl2O2	#N/A	Metabolic pathways;Microbial metabolism in diverse environments;Other	rp
FAUX	3-sulfocatechol@3.103-rp	3-sulfocatechol	189.994	3.103	C6H6O5S	#N/A	Microbial metabolism in diverse environments;Other	rp
FAUX	190.06907@0.92-rp	#N/A	190.069	0.92	C7H15N2PS	#N/A	#N/A	rp
FAUX	3-hydroxybutanoyloxybutanoicacid@4.226-rp	3-hydroxybutanoyloxybutanoicacid	190.084	4.226	C8H14O5	#N/A	Metabolic pathways;Other	rp
FAUX	3-hydroxybutanoyloxybutanoicacid@6.273-rp	3-hydroxybutanoyloxybutanoicacid	190.084	6.273	C8H14O5	#N/A	Metabolic pathways;Other	rp
FAUX	3-hydroxybutanoyloxybutanoicacid@6.067-rp	3-hydroxybutanoyloxybutanoicacid	190.084	6.067	C8H14O5	#N/A	Metabolic pathways;Other	rp
FAUX	2-{2-[2-(Allyloxy)ethoxy]ethoxy}ethanol@6.269-rp	2-{2-[2-(Allyloxy)ethoxy]ethoxy}ethanol	190.121	6.269	C9H18O4	8687275	#N/A	rp
FAUX	2-{2-[2-(Allyloxy)ethoxy]ethoxy}ethanol@6.447-rp	2-{2-[2-(Allyloxy)ethoxy]ethoxy}ethanol	190.121	6.447	C9H18O4	8687275	#N/A	rp
FAUX	2-{2-[2-(Allyloxy)ethoxy]ethoxy}ethanol@7.318-rp	2-{2-[2-(Allyloxy)ethoxy]ethoxy}ethanol	190.121	7.318	C9H18O4	8687275	#N/A	rp
FAUX	5-hydroxyindoleaceticacid@2.098-rp	5-hydroxyindoleaceticacid	191.058	2.098	C10H9NO3	#N/A	Metabolic pathways;Other	rp
FAUX	5-hydroxyindoleaceticacid@7.58-rp	5-hydroxyindoleaceticacid	191.058	7.58	C10H9NO3	#N/A	Metabolic pathways;Other	rp
FAUX	191.06686@0.943-rp	#N/A	191.067	0.943	C5H5N9	#N/A	#N/A	rp
FAUX	191.98031@1.171-rp	#N/A	191.98	1.171	C10H5ClS	#N/A	#N/A	rp
FAUX	2-dehydro-3-deoxy-d-glucaricacid@1.387-rp	2-dehydro-3-deoxy-d-glucaricacid	192.027	1.387	C6H8O7	#N/A	Metabolic pathways;Biosynthesis of secondary metabolites;Microbial metabolism in diverse environments;Biosynthesis of plant secondary metabolites;Biosynthesis of amino acids;2-Oxocarboxylic acid metabolism;Biosynthesis of alkaloids derived from shikimate pathway;Biosynthesis of phenylpropanoids;Biosynthesis of plant hormones;Central carbon metabolism in cancer;Biosynthesis of alkaloids derived fr…	rp
FAUX	2-dehydro-3-deoxy-d-glucaricacid@1.209-rp	2-dehydro-3-deoxy-d-glucaricacid	192.027	1.209	C6H8O7	#N/A	Metabolic pathways;Biosynthesis of secondary metabolites;Microbial metabolism in diverse environments;Biosynthesis of plant secondary metabolites;Biosynthesis of amino acids;2-Oxocarboxylic acid metabolism;Biosynthesis of alkaloids derived from shikimate pathway;Biosynthesis of phenylpropanoids;Biosynthesis of plant hormones;Central carbon metabolism in cancer;Biosynthesis of alkaloids derived fr…	rp
FAUX	2-dehydro-3-deoxy-d-glucaricacid@1.291-rp	2-dehydro-3-deoxy-d-glucaricacid	192.027	1.291	C6H8O7	#N/A	Metabolic pathways;Biosynthesis of secondary metabolites;Microbial metabolism in diverse environments;Biosynthesis of plant secondary metabolites;Biosynthesis of amino acids;2-Oxocarboxylic acid metabolism;Biosynthesis of alkaloids derived from shikimate pathway;Biosynthesis of phenylpropanoids;Biosynthesis of plant hormones;Central carbon metabolism in cancer;Biosynthesis of alkaloids derived fr…	rp
FAUX	Quinicacid@1.105-rp	Quinicacid	192.063	1.105	C7H12O6	#N/A	Metabolic pathways;Biosynthesis of secondary metabolites;Other	rp
FAUX	193.07042@1.43-rp	#N/A	193.07	1.43	C6H7N7O	#N/A	#N/A	rp
FAUX	2-methylhippuricacid@6.7-rp	2-methylhippuricacid	193.074	6.7	C10H11NO3	#N/A	Phenylalanine metabolism;Other	rp
FAUX	193.99583@1.076-rp	#N/A	193.996	1.076	C2H3ClN6O3	#N/A	#N/A	rp
FAUX	2-ketogluconicacid@1.023-rp	2-ketogluconicacid	194.043	1.023	C6H10O7	#N/A	Metabolic pathways;Microbial metabolism in diverse environments;ABC transporters;Other	rp
FAUX	Temozolomide@6.36-rp	Temozolomide	194.055	6.36	C6H6N6O2	5201	#N/A	rp
FAUX	5-hydroxyconiferaldehyde@9.247-rp	5-hydroxyconiferaldehyde	194.058	9.247	C10H10O4	#N/A	Metabolic pathways;Biosynthesis of secondary metabolites;Biosynthesis of phenylpropanoids;Phenylpropanoid biosynthesis	rp
FAUX	196.07097@8.463-rp	#N/A	196.071	8.463	C6H8N6O2	#N/A	#N/A	rp
FAUX	196.09348@0.95-rp	#N/A	196.093	0.95	C4H8N10	#N/A	#N/A	rp
FAUX	1-carboxy-3-hydroxyadamantane@9.841-rp	1-carboxy-3-hydroxyadamantane	196.11	9.841	C11H16O3	2018184	#N/A	rp
FAUX	2509@14.993-rp	2509	196.146	14.993	C12H20O2	1266019	#N/A	rp
FAUX	2509@16.22-rp	2509	196.146	16.22	C12H20O2	1266019	#N/A	rp
FAUX	196.95352@1.007-rp	#N/A	196.954	1.007	C5HN3O2P2	#N/A	#N/A	rp
FAUX	L-Dopa@1.449-rp	L-Dopa	197.069	1.449	C9H11NO4	#N/A	Metabolic pathways;Biosynthesis of secondary metabolites;Biosynthesis of plant secondary metabolites;Biosynthesis of alkaloids derived from shikimate pathway;Other	rp
FAUX	6-aminohexylphosphate@1.029-rp	6-aminohexylphosphate	197.082	1.029	C6H16NO4P	465140	#N/A	rp
FAUX	197.08963@1.021-rp	#N/A	197.09	1.021	C6H15NO6	#N/A	#N/A	rp
FAUX	197.98146@0.886-rp	#N/A	197.981	0.886	#N/A	#N/A	#N/A	rp
FAUX	Dihydroxydihydrocumicacid@6.345-rp	Dihydroxydihydrocumicacid	198.089	6.345	C10H14O4	#N/A	Metabolic pathways;Biosynthesis of secondary metabolites;Microbial metabolism in diverse environments;Degradation of aromatic compounds;Other	rp
FAUX	5-Hydroxy-3,4-dimethyl-5-pentyl-2(5H)-furanone@12.166-rp	5-Hydroxy-3,4-dimethyl-5-pentyl-2(5H)-furanone	198.125	12.166	C11H18O3	291226	Metabolic pathways;Histidine metabolism	rp
FAUX	Dodecenoicacid@17.108-rp	Dodecenoicacid	198.162	17.108	C12H22O2	4445856	Other	rp
FAUX	Dodecenoicacid@16.839-rp	Dodecenoicacid	198.162	16.839	C12H22O2	4445856	Other	rp
FAUX	198.94739@1.012-rp	#N/A	198.947	1.012	C2H4ClN3O2P2	#N/A	#N/A	rp
FAUX	199.03316@0.938-rp	#N/A	199.033	0.938	C7H10N3PS	#N/A	#N/A	rp
FAUX	199.03437@0.949-rp	#N/A	199.034	0.949	C5H5N5O4	#N/A	#N/A	rp
FAUX	1739990@11.662-rp	1739990	199.23	11.662	C13H29N	37235	#N/A	rp
FAUX	clonitrate@0.949-rp	clonitrate	199.983	0.949	C3H5ClN2O6	21476758	#N/A	rp
FAUX	200.04503@1.092-rp	#N/A	200.045	1.092	C6H13ClO5	#N/A	#N/A	rp
FAUX	BY7900000@8.969-rp	BY7900000	200.095	8.969	C12H12N2O	7298	#N/A	rp
FAUX	Dimethyl1,4-cyclohexanedicarboxylate@7.935-rp	Dimethyl1,4-cyclohexanedicarboxylate	200.105	7.935	C10H16O4	6930	#N/A	rp
FAUX	Dimethyl1,4-cyclohexanedicarboxylate@8.713-rp	Dimethyl1,4-cyclohexanedicarboxylate	200.105	8.713	C10H16O4	6930	#N/A	rp
FAUX	Dimethyl1,4-cyclohexanedicarboxylate@8.902-rp	Dimethyl1,4-cyclohexanedicarboxylate	200.105	8.902	C10H16O4	6930	#N/A	rp
FAUX	Dimethyl1,4-cyclohexanedicarboxylate@9.594-rp	Dimethyl1,4-cyclohexanedicarboxylate	200.105	9.594	C10H16O4	6930	#N/A	rp
FAUX	200.94866@1.397-rp	#N/A	200.949	1.397	C4HN3O3P2	#N/A	#N/A	rp
FAUX	Sulfocysteine@1.054-rp	Sulfocysteine	200.976	1.054	C3H7NO5S2	#N/A	Metabolic pathways;Biosynthesis of amino acids;Other	rp
FAUX	201.04842@0.823-rp	#N/A	201.048	0.823	C4H11NO8	#N/A	#N/A	rp
FAUX	(S)-1-BOC-3-HYDROXYPIPERIDINE@9.172-rp	(S)-1-BOC-3-HYDROXYPIPERIDINE	201.137	9.172	C10H19NO3	1246131	#N/A	rp
FAUX	201.95236@0.925-rp	#N/A	201.952	0.925	C3H7O4PS2	#N/A	#N/A	rp
FAUX	201.96177@0.934-rp	#N/A	201.962	0.934	C5H5N2OP3	#N/A	#N/A	rp
FAUX	4-Hydroxy-3,5-dimethylbenzenesulfonicacid@10.153-rp	4-Hydroxy-3,5-dimethylbenzenesulfonicacid	202.03	10.153	C8H10O4S	80388	#N/A	rp
FAUX	202.03282@0.815-rp	#N/A	202.033	0.815	C4H10O9	#N/A	Metabolic pathways;Microbial metabolism in diverse environments;Other	rp
FAUX	DA9185000@0.976-rp	DA9185000	202.045	0.976	C12H10OS	13090	#N/A	rp
FAUX	202.04519@0.925-rp	#N/A	202.045	0.925	C4H6N6O4	#N/A	#N/A	rp
FAUX	DA9185000@1.279-rp	DA9185000	202.045	1.279	C12H10OS	13090	#N/A	rp
FAUX	Diethyloxoglutaricacid@4.865-rp	Diethyloxoglutaricacid	202.084	4.865	C9H14O5	#N/A	#N/A	rp
FAUX	Diethyloxoglutaricacid@4.205-rp	Diethyloxoglutaricacid	202.084	4.205	C9H14O5	#N/A	#N/A	rp
FAUX	Diethyloxoglutaricacid@4.64-rp	Diethyloxoglutaricacid	202.084	4.64	C9H14O5	#N/A	#N/A	rp
FAUX	Diethyladipicacid@11.065-rp	Diethyladipicacid	202.121	11.065	C10H18O4	#N/A	#N/A	rp
FAUX	Diethyladipicacid@12.071-rp	Diethyladipicacid	202.121	12.071	C10H18O4	#N/A	#N/A	rp
FAUX	Diethyladipicacid@7.969-rp	Diethyladipicacid	202.121	7.969	C10H18O4	#N/A	#N/A	rp
FAUX	Dimethylarginine@1.019-rp	Dimethylarginine	202.143	1.019	C8H18N4O2	#N/A	#N/A	rp
FAUX	MFCD00041564@12.767-rp	MFCD00041564	202.157	12.767	C11H22O3	69664	#N/A	rp
FAUX	202.96399@1.274-rp	#N/A	202.964	1.274	C4H3N3O3P2	#N/A	#N/A	rp
FAUX	203.04829@0.974-rp	#N/A	203.048	0.974	#N/A	#N/A	#N/A	rp
FAUX	203.05592@1.454-rp	#N/A	203.056	1.454	C7H5N7O	#N/A	#N/A	rp
FAUX	Acetylcarnitine@1.235-rp	Acetylcarnitine	203.116	1.235	C9H17NO4	21243783	#N/A	rp
FAUX	3-Carboxylato-1,3,5-trideoxy-5-(trimethylammonio)pent-2-ulose@7.558-rp	3-Carboxylato-1,3,5-trideoxy-5-(trimethylammonio)pent-2-ulose	203.116	7.558	C9H17NO4	10135006	#N/A	rp
FAUX	204.02142@1.284-rp	#N/A	204.021	1.284	C6H10N2O2P2	#N/A	#N/A	rp
FAUX	204.02787@0.984-rp	#N/A	204.028	0.984	C3H5ClN8O	#N/A	2-Oxocarboxylic acid metabolism	rp
FAUX	D-gamma-Glu-Gly@1.045-rp	D-gamma-Glu-Gly	204.074	1.045	C7H12N2O5	5036964	#N/A	rp
FAUX	2-oxo-8-methylthiooctanoicacid@0.984-rp	2-oxo-8-methylthiooctanoicacid	204.082	0.984	C9H16O3S	24808203	Biosynthesis of secondary metabolites;2-Oxocarboxylic acid metabolism;Other	rp
FAUX	Tryptophan@3.059-rp	Tryptophan	204.09	3.059	C11H12N2O2	#N/A	Metabolic pathways;Biosynthesis of secondary metabolites;Biosynthesis of plant secondary metabolites;Biosynthesis of amino acids;2-Oxocarboxylic acid metabolism;Biosynthesis of alkaloids derived from shikimate pathway;Biosynthesis of phenylpropanoids;Biosynthesis of plant hormones;Central carbon metabolism in cancer;Other	rp
FAUX	MFCD00223933@7.503-rp	MFCD00223933	204.1	7.503	C9H16O5	204952	#N/A	rp
FAUX	MFCD00223933@6.484-rp	MFCD00223933	204.1	6.484	C9H16O5	204952	#N/A	rp
FAUX	MFCD00223933@7.654-rp	MFCD00223933	204.1	7.654	C9H16O5	204952	#N/A	rp
FAUX	5-methoxyindoleaceticacid@8.364-rp	5-methoxyindoleaceticacid	205.074	8.364	C11H11NO3	#N/A	Metabolic pathways;Other	rp
FAUX	5-methoxyindoleaceticacid@9.227-rp	5-methoxyindoleaceticacid	205.074	9.227	C11H11NO3	#N/A	Metabolic pathways;Other	rp
FAUX	Pantothenol@3.144-rp	Pantothenol	205.131	3.144	C9H19NO4	#N/A	Other	rp
FAUX	207.00957@1.194-rp	#N/A	207.01	1.194	C3H6ClN7S	#N/A	#N/A	rp
FAUX	1-nitro-5,6-dihydroxy-dihydronaphthalene@6.541-rp	1-nitro-5,6-dihydroxy-dihydronaphthalene	207.053	6.541	C10H9NO4	#N/A	Metabolic pathways;Other	rp
FAUX	(S)-a,2-diamino-g-oxo-Benzenebutanoate@9.844-rp	(S)-a,2-diamino-g-oxo-Benzenebutanoate	207.078	9.844	C10H11N2O3	20170067	#N/A	rp
FAUX	N-acetylphenylalanine@8.11-rp	N-acetylphenylalanine	207.09	8.11	C11H13NO3	#N/A	Metabolic pathways;Phenylalanine metabolism	rp
FAUX	207.94617@1.115-rp	#N/A	207.946	1.115	C2H7ClO5P2	#N/A	#N/A	rp
FAUX	208.04825@1.417-rp	#N/A	208.048	1.417	C2H8N8O2S	#N/A	#N/A	rp
FAUX	208.0534@0.916-rp	#N/A	208.053	0.916	C7H8N6S	#N/A	Microbial metabolism in diverse environments;Other	rp
FAUX	4-O-Methyl-D-glucuronicacid@1.127-rp	4-O-Methyl-D-glucuronicacid	208.058	1.127	C7H12O7	133102	#N/A	rp
FAUX	2,4-Diamino-6-(hydroxymethyl)pteridin-7-ol@7.557-rp	2,4-Diamino-6-(hydroxymethyl)pteridin-7-ol	208.071	7.557	C7H8N6O2	4589086	#N/A	rp
FAUX	Formyl-5-hydroxykynurenamine@2.1-rp	Formyl-5-hydroxykynurenamine	208.085	2.1	C10H12N2O3	389614	Metabolic pathways;Other	rp
FAUX	2-O-Aminohexuronicacid@1.388-rp	2-O-Aminohexuronicacid	209.053	1.388	C6H11NO7	5256788	#N/A	rp
FAUX	209.1057@9.951-rp	#N/A	209.106	9.951	C4H15N7OS	#N/A	Biosynthesis of alkaloids derived from shikimate pathway	rp
FAUX	209.10571@10.736-rp	#N/A	209.106	10.736	C4H15N7OS	#N/A	Biosynthesis of alkaloids derived from shikimate pathway	rp
FAUX	209.10575@8.918-rp	#N/A	209.106	8.918	C4H15N7OS	#N/A	Biosynthesis of alkaloids derived from shikimate pathway	rp
FAUX	Propoxur@9.16-rp	Propoxur	209.106	9.16	C11H15NO3	4775	Biosynthesis of alkaloids derived from shikimate pathway	rp
FAUX	209.8527@0.984-rp	#N/A	209.853	0.984	#N/A	#N/A	#N/A	rp
FAUX	209.96051@1.089-rp	#N/A	209.961	1.089	C4H4ClN2O4P	#N/A	#N/A	rp
FAUX	209.98101@1.353-rp	#N/A	209.981	1.353	CH2N6O5S	#N/A	#N/A	rp
FAUX	209.99043@1.27-rp	#N/A	209.99	1.27	C7H2N2O6	#N/A	#N/A	rp
FAUX	210.01154@0.893-rp	#N/A	210.012	0.893	C4H6N2O8	#N/A	#N/A	rp
FAUX	N,N'-Dimethoxy-7H-purine-2,6-diamine@9.845-rp	N,N'-Dimethoxy-7H-purine-2,6-diamine	210.087	9.845	C7H10N6O2	119524	#N/A	rp
FAUX	210.08662@10.992-rp	#N/A	210.087	10.992	C8H21P3	#N/A	#N/A	rp
FAUX	3-(3,4-dimethoxyphenyl)-propionicacid@11.45-rp	3-(3,4-dimethoxyphenyl)-propionicacid	210.089	11.45	C11H14O4	#N/A	Metabolic pathways;Biosynthesis of secondary metabolites;Biosynthesis of phenylpropanoids;Phenylpropanoid biosynthesis	rp
FAUX	Jasmonicacid@10.826-rp	Jasmonicacid	210.125	10.826	C12H18O3	4444606	Metabolic pathways;Biosynthesis of secondary metabolites;Biosynthesis of plant secondary metabolites;Biosynthesis of plant hormones;alpha-Linolenic acid metabolism;Other	rp
FAUX	CYCLO(L-LEU-L-PRO)@8.678-rp	CYCLO(L-LEU-L-PRO)	210.137	8.678	C11H18N2O2	5428292	#N/A	rp
FAUX	211.84977@0.983-rp	#N/A	211.85	0.983	#N/A	#N/A	#N/A	rp
FAUX	211.90784@1.45-rp	#N/A	211.908	1.45	C7H2P2S2	#N/A	#N/A	rp
FAUX	2-phosphinomethylmalicacid@1.12-rp	2-phosphinomethylmalicacid	212.009	1.12	C5H9O7P	10519297	Biosynthesis of secondary metabolites;Other	rp
FAUX	212.06587@6.066-rp	#N/A	212.066	6.066	C6H18N2P2S	#N/A	#N/A	rp
FAUX	AS8925000@7.293-rp	AS8925000	212.105	7.293	C11H16O4	15817	Metabolic pathways;Biosynthesis of secondary metabolites;Other	rp
FAUX	AS8925000@7.541-rp	AS8925000	212.105	7.541	C11H16O4	15817	Metabolic pathways;Biosynthesis of secondary metabolites;Other	rp
FAUX	YQ2978400@17.727-rp	YQ2978400	212.178	17.727	C13H24O2	12206	Other	rp
FAUX	3-indoxylsulfuricacid@5.124-rp	3-indoxylsulfuricacid	213.01	5.124	C8H7NO4S	#N/A	#N/A	rp
FAUX	213.04369@1.032-rp	#N/A	213.044	1.032	C4H13N3O3P2	#N/A	#N/A	rp
FAUX	213.84687@0.984-rp	#N/A	213.847	0.984	#N/A	#N/A	#N/A	rp
FAUX	213.89411@1.008-rp	#N/A	213.894	1.008	C3H3BrO4S	#N/A	#N/A	rp
FAUX	214.01301@5.14-rp	#N/A	214.013	5.14	C2H2N10OS	#N/A	#N/A	rp
FAUX	2-deoxyribose5-phosphate@1.018-rp	2-deoxyribose5-phosphate	214.025	1.018	C5H11O7P	#N/A	Metabolic pathways;Biosynthesis of secondary metabolites;Biosynthesis of plant secondary metabolites;Biosynthesis of plant hormones;Pyrimidine metabolism;Other	rp
FAUX	METHYLCAMPHORATE,(-)-@8.775-rp	METHYLCAMPHORATE,(-)-	214.12	8.775	C11H18O4	241500	#N/A	rp
FAUX	METHYLCAMPHORATE,(-)-@9.057-rp	METHYLCAMPHORATE,(-)-	214.12	9.057	C11H18O4	241500	#N/A	rp
FAUX	METHYLCAMPHORATE,(-)-@11.958-rp	METHYLCAMPHORATE,(-)-	214.12	11.958	C11H18O4	241500	#N/A	rp
FAUX	METHYLCAMPHORATE,(-)-@14.689-rp	METHYLCAMPHORATE,(-)-	214.12	14.689	C11H18O4	241500	#N/A	rp
FAUX	METHYLCAMPHORATE,(-)-@10.935-rp	METHYLCAMPHORATE,(-)-	214.121	10.935	C11H18O4	241500	#N/A	rp
FAUX	[(2-Isopropyl-5-methylcyclohexyl)oxy]aceticacid@14.292-rp	[(2-Isopropyl-5-methylcyclohexyl)oxy]aceticacid	214.157	14.292	C12H22O3	88289	#N/A	rp
FAUX	214.89661@1.227-rp	#N/A	214.897	1.227	C2HCl2N3OP2	#N/A	#N/A	rp
FAUX	214.96408@1.007-rp	#N/A	214.964	1.007	C5H3N3O3P2	#N/A	#N/A	rp
FAUX	216.04006@1.02-rp	#N/A	216.04	1.02	C6H13ClO6	#N/A	Metabolic pathways;Biosynthesis of secondary metabolites;Biosynthesis of plant secondary metabolites;Biosynthesis of plant hormones;Other	rp
FAUX	1,2,3,4-tetrahydro-beta-carboline-3-carboxylicacid@4.629-rp	1,2,3,4-tetrahydro-beta-carboline-3-carboxylicacid	216.09	4.629	C12H12N2O2	88749	#N/A	rp
FAUX	DEEMM@6.966-rp	DEEMM	216.1	6.966	C10H16O5	6609	#N/A	rp
FAUX	DEEMM@6.345-rp	DEEMM	216.1	6.345	C10H16O5	6609	#N/A	rp
FAUX	Undecanedioicacid@13.117-rp	Undecanedioicacid	216.136	13.117	C11H20O4	#N/A	#N/A	rp
FAUX	Undecanedioicacid@12.165-rp	Undecanedioicacid	216.136	12.165	C11H20O4	#N/A	#N/A	rp
FAUX	Hydroxydodecanoicacid@13.878-rp	Hydroxydodecanoicacid	216.173	13.878	C12H24O3	#N/A	#N/A	rp
FAUX	Hydroxydodecanoicacid@15.044-rp	Hydroxydodecanoicacid	216.173	15.044	C12H24O3	#N/A	#N/A	rp
FAUX	Hydroxydodecanoicacid@14.336-rp	Hydroxydodecanoicacid	216.173	14.336	C12H24O3	#N/A	#N/A	rp
FAUX	216.87564@1.148-rp	#N/A	216.876	1.148	CHClN3PS3	#N/A	#N/A	rp
FAUX	216.97957@1.265-rp	#N/A	216.98	1.265	C5H5N3O3P2	#N/A	#N/A	rp
FAUX	CarnitineC3:0@1.58-rp	CarnitineC3:0	217.131	1.58	C10H19NO4	#N/A	#N/A	rp
FAUX	217.91662@1.387-rp	#N/A	217.917	1.387	#N/A	#N/A	#N/A	rp
FAUX	217.93579@0.942-rp	#N/A	217.936	0.942	C8HN2P3	#N/A	#N/A	rp
FAUX	Sulfosalicylicacid@1.545-rp	Sulfosalicylicacid	217.988	1.545	C7H6O6S	#N/A	Other	rp
FAUX	218.01909@0.966-rp	#N/A	218.019	0.966	C7H2N6O3	#N/A	#N/A	rp
FAUX	218.01918@1.289-rp	#N/A	218.019	1.289	C7H2N6O3	#N/A	#N/A	rp
FAUX	4-(2-Hydroxyethyl)phenylhydrogensulfate@2.13-rp	4-(2-Hydroxyethyl)phenylhydrogensulfate	218.024	2.13	C8H10O5S	30777652	#N/A	rp
FAUX	3,7-Dinitro-1,3,5,7-tetraazabicyclo[3.3.1]nonane@0.954-rp	3,7-Dinitro-1,3,5,7-tetraazabicyclo[3.3.1]nonane	218.076	0.954	C5H10N6O4	63544	#N/A	rp
FAUX	MFCD00037215@1.175-rp	MFCD00037215	218.09	1.175	C8H14N2O5	389104	#N/A	rp
FAUX	Di-tert-butyldicarbonate@8.938-rp	Di-tert-butyldicarbonate	218.115	8.938	C10H18O5	81704	#N/A	rp
FAUX	Di-tert-butyldicarbonate@8.713-rp	Di-tert-butyldicarbonate	218.115	8.713	C10H18O5	81704	#N/A	rp
FAUX	Di-tert-butyldicarbonate@7.71-rp	Di-tert-butyldicarbonate	218.115	7.71	C10H18O5	81704	#N/A	rp
FAUX	Di-tert-butyldicarbonate@7.934-rp	Di-tert-butyldicarbonate	218.115	7.934	C10H18O5	81704	#N/A	rp
FAUX	Di-tert-butyldicarbonate@8.459-rp	Di-tert-butyldicarbonate	218.115	8.459	C10H18O5	81704	#N/A	rp
FAUX	218.95894@1.406-rp	#N/A	218.959	1.406	C4HN3O6S	#N/A	#N/A	rp
FAUX	219.05928@0.972-rp	#N/A	219.059	0.972	#N/A	#N/A	#N/A	rp
FAUX	Pantothenicacid@3.016-rp	Pantothenicacid	219.11	3.016	C9H17NO5	#N/A	Metabolic pathways;Biosynthesis of secondary metabolites;Other	rp
FAUX	220.04309@0.834-rp	#N/A	220.043	0.834	C8H13ClN2OS	#N/A	#N/A	rp
FAUX	220.05225@9.839-rp	#N/A	220.052	9.839	C7H14N2O2P2	#N/A	#N/A	rp
FAUX	(1Z)-1-Diazonio-1-(diethoxyphosphoryl)-1-propen-2-olate@2.126-rp	(1Z)-1-Diazonio-1-(diethoxyphosphoryl)-1-propen-2-olate	220.062	2.126	C7H13N2O4P	9119211	#N/A	rp
FAUX	5-hydroxytryptophan@1.573-rp	5-hydroxytryptophan	220.085	1.573	C11H12N2O3	#N/A	Metabolic pathways;Biosynthesis of alkaloids derived from shikimate pathway;Other	rp
FAUX	5-hydroxytryptophan@1.419-rp	5-hydroxytryptophan	220.085	1.419	C11H12N2O3	#N/A	Metabolic pathways;Biosynthesis of alkaloids derived from shikimate pathway;Other	rp
FAUX	5-hydroxytryptophan@3.059-rp	5-hydroxytryptophan	220.085	3.059	C11H12N2O3	#N/A	Metabolic pathways;Biosynthesis of alkaloids derived from shikimate pathway;Other	rp
FAUX	220.86234@1.017-rp	#N/A	220.862	1.017	#N/A	#N/A	#N/A	rp
FAUX	220.87335@1.062-rp	#N/A	220.873	1.062	C2H5BrClNS2	#N/A	#N/A	rp
FAUX	220.97452@1.267-rp	#N/A	220.975	1.267	C4H5N3O4P2	#N/A	#N/A	rp
FAUX	EthylD-glucopyranosiduronicacid@1.418-rp	EthylD-glucopyranosiduronicacid	222.074	1.418	C8H14O7	134174	#N/A	rp
FAUX	222.84124@1.084-rp	#N/A	222.841	1.084	#N/A	#N/A	#N/A	rp
FAUX	MFCD00049730@1.018-rp	MFCD00049730	222.859	1.018	Cl2Eu	75541	#N/A	rp
FAUX	MFCD00049730@1.142-rp	MFCD00049730	222.859	1.142	Cl2Eu	75541	#N/A	rp
FAUX	2-hydroxy-4-(methoxymethyl)-6-methyl-5-nitronicotinonitrile@11.728-rp	2-hydroxy-4-(methoxymethyl)-6-methyl-5-nitronicotinonitrile	223.059	11.728	C9H9N3O4	72692	#N/A	rp
FAUX	N-acetyltyrosine@5.976-rp	N-acetyltyrosine	223.084	5.976	C11H13NO4	#N/A	#N/A	rp
FAUX	223.98526@0.928-rp	#N/A	223.985	0.928	C5H11N2P3S	#N/A	#N/A	rp
FAUX	(E)-Mevinfos@7.558-rp	(E)-Mevinfos	224.045	7.558	C7H13O6P	4511751	#N/A	rp
FAUX	224.06448@0.83-rp	#N/A	224.064	0.83	C9H19ClP2	#N/A	#N/A	rp
FAUX	Methyl5-(1,2-dihydroxyethyl)pentopyranoside@1.105-rp	Methyl5-(1,2-dihydroxyethyl)pentopyranoside	224.089	1.105	C8H16O7	190426	#N/A	rp
FAUX	A-134U@11.063-rp	A-134U	224.102	11.063	C8H12N6O2	85353	#N/A	rp
FAUX	Jasmonicacidmethylester@11.836-rp	Jasmonicacidmethylester	224.141	11.836	C13H20O3	#N/A	Biosynthesis of secondary metabolites;alpha-Linolenic acid metabolism	rp
FAUX	Jasmonicacidmethylester@16.231-rp	Jasmonicacidmethylester	224.141	16.231	C13H20O3	#N/A	Biosynthesis of secondary metabolites;alpha-Linolenic acid metabolism	rp
FAUX	Tetradecadienoicacid@17.593-rp	Tetradecadienoicacid	224.178	17.593	C14H24O2	#N/A	#N/A	rp
FAUX	226.06057@9.841-rp	#N/A	226.061	9.841	C7H15O6P	#N/A	#N/A	rp
FAUX	6-Phospholysine@3.06-rp	6-Phospholysine	226.072	3.06	C6H15N2O5P	323062	#N/A	rp
FAUX	226.0814@7.657-rp	#N/A	226.081	7.657	C8H21OP3	#N/A	#N/A	rp
FAUX	Dinitrosocaffeidine@6.483-rp	Dinitrosocaffeidine	226.082	6.483	C7H10N6O3	112665	#N/A	rp
FAUX	1,6-Hexanedioldiacrylate@8.222-rp	1,6-Hexanedioldiacrylate	226.12	8.222	C12H18O4	23890	#N/A	rp
FAUX	Myristoleicacid@18.52-rp	Myristoleicacid	226.193	18.52	C14H26O2	4444564	#N/A	rp
FAUX	Myristoleicacid@18.317-rp	Myristoleicacid	226.193	18.317	C14H26O2	4444564	#N/A	rp
FAUX	228.00366@1.175-rp	#N/A	228.004	1.175	C6H9ClO7	#N/A	Other	rp
FAUX	2-deoxyuridine@2.308-rp	2-deoxyuridine	228.075	2.308	C9H12N2O5	#N/A	Metabolic pathways;ABC transporters;Pyrimidine metabolism	rp
FAUX	228.10848@0.892-rp	#N/A	228.108	0.892	C6H12N8O2	#N/A	#N/A	rp
FAUX	Pro-hydroxy-pro@1.092-rp	Pro-hydroxy-pro	228.111	1.092	C10H16N2O4	#N/A	#N/A	rp
FAUX	DibutylFumarate@10.117-rp	DibutylFumarate	228.136	10.117	C12H20O4	4436357	Biosynthesis of secondary metabolites;alpha-Linolenic acid metabolism	rp
FAUX	Dodecenedioicacid@12.958-rp	Dodecenedioicacid	228.136	12.958	C12H20O4	#N/A	Biosynthesis of secondary metabolites;alpha-Linolenic acid metabolism	rp
FAUX	Dodecenedioicacid@13.453-rp	Dodecenedioicacid	228.136	13.453	C12H20O4	#N/A	Biosynthesis of secondary metabolites;alpha-Linolenic acid metabolism	rp
FAUX	Dodecenedioicacid@12.681-rp	Dodecenedioicacid	228.136	12.681	C12H20O4	#N/A	Biosynthesis of secondary metabolites;alpha-Linolenic acid metabolism	rp
FAUX	Dodecenedioicacid@14.056-rp	Dodecenedioicacid	228.136	14.056	C12H20O4	#N/A	Biosynthesis of secondary metabolites;alpha-Linolenic acid metabolism	rp
FAUX	DibutylFumarate@15.377-rp	DibutylFumarate	228.136	15.377	C12H20O4	4436357	Biosynthesis of secondary metabolites;alpha-Linolenic acid metabolism	rp
FAUX	Dodecenedioicacid@11.018-rp	Dodecenedioicacid	228.136	11.018	C12H20O4	#N/A	Biosynthesis of secondary metabolites;alpha-Linolenic acid metabolism	rp
FAUX	Myristicacid@19.405-rp	Myristicacid	228.209	19.405	C14H28O2	#N/A	Metabolic pathways;Other	rp
FAUX	Ergothioneine@1.223-rp	Ergothioneine	229.088	1.223	C9H15N3O2S	#N/A	#N/A	rp
FAUX	Arabinose-1-phosphate@1.078-rp	Arabinose-1-phosphate	230.019	1.078	C5H11O8P	#N/A	Metabolic pathways;Biosynthesis of secondary metabolites;Microbial metabolism in diverse environments;Biosynthesis of amino acids;Other	rp
FAUX	2,2'-(2,5-Dioxo-1,4-piperazinediyl)diaceticacid@7.556-rp	2,2'-(2,5-Dioxo-1,4-piperazinediyl)diaceticacid	230.053	7.556	C8H10N2O6	11570299	#N/A	rp
FAUX	2,2'-(2,5-Dioxo-1,4-piperazinediyl)diaceticacid@8.108-rp	2,2'-(2,5-Dioxo-1,4-piperazinediyl)diaceticacid	230.053	8.108	C8H10N2O6	11570299	#N/A	rp
FAUX	230.05574@1.168-rp	#N/A	230.056	1.168	C7H15ClO6	#N/A	#N/A	rp
FAUX	230.07661@1.539-rp	#N/A	230.077	1.539	C6H10N6O4	#N/A	#N/A	rp
FAUX	2ovyv1&2vo2@7.815-rp	2ovyv1&2vo2	230.115	7.815	C11H18O5	66548	#N/A	rp
FAUX	2ovyv1&2vo2@7.301-rp	2ovyv1&2vo2	230.115	7.301	C11H18O5	66548	#N/A	rp
FAUX	2ovyv1&2vo2@7.542-rp	2ovyv1&2vo2	230.115	7.542	C11H18O5	66548	#N/A	rp
FAUX	Dodecanedioicacid@14.242-rp	Dodecanedioicacid	230.152	14.242	C12H22O4	12213	#N/A	rp
FAUX	Dodecanedioicacid@13.181-rp	Dodecanedioicacid	230.152	13.181	C12H22O4	12213	#N/A	rp
FAUX	Dodecanedioicacid@12.191-rp	Dodecanedioicacid	230.152	12.191	C12H22O4	12213	#N/A	rp
FAUX	Dodecanedioicacid@12.809-rp	Dodecanedioicacid	230.152	12.809	C12H22O4	12213	#N/A	rp
FAUX	230.97954@1.273-rp	#N/A	230.98	1.273	C4H12NO2P3S	#N/A	#N/A	rp
FAUX	4-(4-Nitrophenoxy)phenol@1.201-rp	4-(4-Nitrophenoxy)phenol	231.054	1.201	C12H9NO4	134361	#N/A	rp
FAUX	CarnitineC4:0@2.617-rp	CarnitineC4:0	231.147	2.617	C11H21NO4	#N/A	#N/A	rp
FAUX	232.00419@4.801-rp	#N/A	232.004	4.801	C10H5N2O3P	#N/A	#N/A	rp
FAUX	232.03497@1.019-rp	#N/A	232.035	1.019	C6H9N4O4P	#N/A	Metabolic pathways;Other	rp
FAUX	Dimethyl2,2'-[(1,2-dioxo-1,2-ethanediyl)diimino]diacetate@9.845-rp	Dimethyl2,2'-[(1,2-dioxo-1,2-ethanediyl)diimino]diacetate	232.068	9.845	C8H12N2O6	2661823	#N/A	rp
FAUX	2-Formamido-N-(1H-tetrazol-5-yl)benzamide@10.527-rp	2-Formamido-N-(1H-tetrazol-5-yl)benzamide	232.071	10.527	C9H8N6O2	14475012	#N/A	rp
FAUX	MFCD08275911@9.845-rp	MFCD08275911	232.131	9.845	C11H20O5	81732	#N/A	rp
FAUX	MFCD08275911@8.776-rp	MFCD08275911	232.131	8.776	C11H20O5	81732	#N/A	rp
FAUX	MFCD08275911@9.057-rp	MFCD08275911	232.131	9.057	C11H20O5	81732	#N/A	rp
FAUX	MFCD08275911@9.991-rp	MFCD08275911	232.131	9.991	C11H20O5	81732	#N/A	rp
FAUX	232.97485@1.272-rp	#N/A	232.975	1.272	C5H3N3O6S	#N/A	#N/A	rp
FAUX	233.05399@1.019-rp	#N/A	233.054	1.019	C4H8ClN9O	#N/A	#N/A	rp
FAUX	4-Hydroxy-3-(sulfooxy)benzoicacid@0.775-rp	4-Hydroxy-3-(sulfooxy)benzoicacid	233.983	0.775	C7H6O7S	15038197	#N/A	rp
FAUX	234.0317@1.295-rp	#N/A	234.032	1.295	C2H7N10PS	#N/A	#N/A	rp
FAUX	EK6100000@1.426-rp	EK6100000	234.038	1.426	C8H10O8	14804	#N/A	rp
FAUX	EK6100000@2.387-rp	EK6100000	234.038	2.387	C8H10O8	14804	#N/A	rp
FAUX	Diisopropyltartrate@6.967-rp	Diisopropyltartrate	234.11	6.967	C10H18O6	92830	#N/A	rp
FAUX	235.02659@2.13-rp	#N/A	235.027	2.13	C8H6N5O2P	#N/A	#N/A	rp
FAUX	235.86684@0.97-rp	#N/A	235.867	0.97	C6HCl2P3	#N/A	#N/A	rp
FAUX	235.87601@0.972-rp	#N/A	235.876	0.972	C3H2Cl2O4S2	#N/A	#N/A	rp
FAUX	235.92181@1.277-rp	#N/A	235.922	1.277	C2H7O5P3S	#N/A	#N/A	rp
FAUX	4-(Heptyloxy)benzoicacid@13.994-rp	4-(Heptyloxy)benzoicacid	236.141	13.994	C14H20O3	76800	#N/A	rp
FAUX	4-(Heptyloxy)benzoicacid@13.326-rp	4-(Heptyloxy)benzoicacid	236.141	13.326	C14H20O3	76800	#N/A	rp
FAUX	238.06865@1.085-rp	#N/A	238.069	1.085	C5H6N10O2	#N/A	Metabolic pathways;Other	rp
FAUX	8-(1,2-diaminoethyl)-1,3-dimethyl-7H-purine-2,6-dione@12.165-rp	8-(1,2-diaminoethyl)-1,3-dimethyl-7H-purine-2,6-dione	238.118	12.165	C9H14N6O2	442407	#N/A	rp
FAUX	238.15442@0.923-rp	#N/A	238.154	0.923	C10H18N6O	#N/A	#N/A	rp
FAUX	Geranylacetoacetate@12.83-rp	Geranylacetoacetate	238.157	12.83	C14H22O3	4762675	#N/A	rp
FAUX	Geranylacetoacetate@16.807-rp	Geranylacetoacetate	238.157	16.807	C14H22O3	4762675	#N/A	rp
FAUX	Geranylacetoacetate@14.448-rp	Geranylacetoacetate	238.157	14.448	C14H22O3	4762675	#N/A	rp
FAUX	6-lactoyl-5,6,7,8-tetrahydropterin@2.609-rp	6-lactoyl-5,6,7,8-tetrahydropterin	239.102	2.609	C9H13N5O3	#N/A	Metabolic pathways;Other	rp
FAUX	240.02219@0.887-rp	#N/A	240.022	0.887	C5H8N2O9	#N/A	#N/A	rp
FAUX	Cystine@0.982-rp	Cystine	240.024	0.982	C6H12N2O4S2	#N/A	Metabolic pathways;ABC transporters;Other	rp
FAUX	240.06086@0.915-rp	#N/A	240.061	0.915	C7H8N6O4	#N/A	#N/A	rp
FAUX	240.06255@0.916-rp	#N/A	240.063	0.916	C5H13N4O5P	#N/A	Metabolic pathways;Biosynthesis of secondary metabolites;Other	rp
FAUX	240.09712@8.456-rp	#N/A	240.097	8.456	C8H12N6O3	#N/A	#N/A	rp
FAUX	240.09716@8.712-rp	#N/A	240.097	8.712	C9H23OP3	#N/A	#N/A	rp
FAUX	Diethyldiallylmalonate@9.175-rp	Diethyldiallylmalonate	240.136	9.175	C13H20O4	69126	#N/A	rp
FAUX	(1S,2R,5S)-2-Isopropyl-5-methylcyclohexyl3-oxobutanoate@14.559-rp	(1S,2R,5S)-2-Isopropyl-5-methylcyclohexyl3-oxobutanoate	240.172	14.559	C14H24O3	39229	#N/A	rp
FAUX	(1S,2R,5S)-2-Isopropyl-5-methylcyclohexyl3-oxobutanoate@13.839-rp	(1S,2R,5S)-2-Isopropyl-5-methylcyclohexyl3-oxobutanoate	240.173	13.839	C14H24O3	39229	#N/A	rp
FAUX	(1S,2R,5S)-2-Isopropyl-5-methylcyclohexyl3-oxobutanoate@15.344-rp	(1S,2R,5S)-2-Isopropyl-5-methylcyclohexyl3-oxobutanoate	240.173	15.344	C14H24O3	39229	#N/A	rp
FAUX	240.93191@0.995-rp	#N/A	240.932	0.995	C2H6Cl2NO6P	#N/A	#N/A	rp
FAUX	241.97493@1.398-rp	#N/A	241.975	1.398	C6H4N4O3P2	#N/A	#N/A	rp
FAUX	Thymidine@4.12-rp	Thymidine	242.09	4.12	C10H14N2O5	5585	Metabolic pathways;Biosynthesis of secondary metabolites;Pyrimidine metabolism;Other	rp
FAUX	MFCD00014931@8.15-rp	MFCD00014931	242.115	8.15	C12H18O5	16006	#N/A	rp
FAUX	2-Isocapryloyl-3R-hydroxymethyl-gamma-butyrolactone@11.123-rp	2-Isocapryloyl-3R-hydroxymethyl-gamma-butyrolactone	242.152	11.123	C13H22O4	106417	#N/A	rp
FAUX	2-Isocapryloyl-3R-hydroxymethyl-gamma-butyrolactone@12.087-rp	2-Isocapryloyl-3R-hydroxymethyl-gamma-butyrolactone	242.152	12.087	C13H22O4	106417	#N/A	rp
FAUX	2-Isocapryloyl-3R-hydroxymethyl-gamma-butyrolactone@13.455-rp	2-Isocapryloyl-3R-hydroxymethyl-gamma-butyrolactone	242.152	13.455	C13H22O4	106417	#N/A	rp
FAUX	3-Oxotetradecanoicacid@14.78-rp	3-Oxotetradecanoicacid	242.188	14.78	C14H26O3	399829	#N/A	rp
FAUX	3-Oxotetradecanoicacid@16.222-rp	3-Oxotetradecanoicacid	242.188	16.222	C14H26O3	399829	#N/A	rp
FAUX	243.08524@1.168-rp	#N/A	243.085	1.168	C11H18NOPS	#N/A	Metabolic pathways;ABC transporters;Pyrimidine metabolism;Other	rp
FAUX	2,3-Dihydroxypropyl2-(dimethylamino)ethylhydrogenphosphate@1.027-rp	2,3-Dihydroxypropyl2-(dimethylamino)ethylhydrogenphosphate	243.087	1.027	C7H18NO6P	13543681	#N/A	rp
FAUX	2-[(4-Isopropylphenyl)sulfanyl]aniline@1.33-rp	2-[(4-Isopropylphenyl)sulfanyl]aniline	243.108	1.33	C15H17NS	166073	#N/A	rp
FAUX	243.94659@0.956-rp	#N/A	243.947	0.956	C4H6ClN2O4PS	#N/A	#N/A	rp
FAUX	(1-Hydroxy-1,1-pentanediyl)bis(phosphonate)@1.27-rp	(1-Hydroxy-1,1-pentanediyl)bis(phosphonate)	243.99	1.27	C5H10O7P2	10533089	#N/A	rp
FAUX	(2E)-3-[4-(Sulfooxy)phenyl]acrylicacid@8.18-rp	(2E)-3-[4-(Sulfooxy)phenyl]acrylicacid	244.004	8.18	C9H8O6S	4797737	#N/A	rp
FAUX	Carnidazole@9.844-rp	Carnidazole	244.062	9.844	C8H12N4O3S	2297829	#N/A	rp
FAUX	244.06644@1.045-rp	#N/A	244.066	1.045	C7H13N6PS	#N/A	#N/A	rp
FAUX	Pseudouridine@1.708-rp	Pseudouridine	244.07	1.708	C9H12N2O6	#N/A	Metabolic pathways;ABC transporters;Pyrimidine metabolism	rp
FAUX	Pseudouridine@1.424-rp	Pseudouridine	244.07	1.424	C9H12N2O6	#N/A	Metabolic pathways;ABC transporters;Pyrimidine metabolism	rp
FAUX	244.07088@0.925-rp	#N/A	244.071	0.925	C11H19P3	#N/A	#N/A	rp
FAUX	(3aR,5R,5aS,8aS,8bR)-2,2,5,7,7-Pentamethyltetrahydro-3aH-bis[1,3]dioxolo[4,5-b:4',5'-d]pyran@8.217-rp	(3aR,5R,5aS,8aS,8bR)-2,2,5,7,7-Pentamethyltetrahydro-3aH-bis[1,3]dioxolo[4,5-b:4',5'-d]pyran	244.131	8.217	C12H20O5	9152881	#N/A	rp
FAUX	244.13085@8.486-rp	#N/A	244.131	8.486	C13H24S2	#N/A	#N/A	rp
FAUX	(3aR,5R,5aS,8aS,8bR)-2,2,5,7,7-Pentamethyltetrahydro-3aH-bis[1,3]dioxolo[4,5-b:4',5'-d]pyran@10.635-rp	(3aR,5R,5aS,8aS,8bR)-2,2,5,7,7-Pentamethyltetrahydro-3aH-bis[1,3]dioxolo[4,5-b:4',5'-d]pyran	244.131	10.635	C12H20O5	9152881	#N/A	rp
FAUX	(3aR,5R,5aS,8aS,8bR)-2,2,5,7,7-Pentamethyltetrahydro-3aH-bis[1,3]dioxolo[4,5-b:4',5'-d]pyran@10.45-rp	(3aR,5R,5aS,8aS,8bR)-2,2,5,7,7-Pentamethyltetrahydro-3aH-bis[1,3]dioxolo[4,5-b:4',5'-d]pyran	244.131	10.45	C12H20O5	9152881	#N/A	rp
FAUX	Brassylicacid@13.395-rp	Brassylicacid	244.167	13.395	C13H24O4	10026	#N/A	rp
FAUX	Brassylicacid@15.238-rp	Brassylicacid	244.168	15.238	C13H24O4	10026	#N/A	rp
FAUX	MFCD00059633@15.813-rp	MFCD00059633	244.204	15.813	C14H28O3	15252	#N/A	rp
FAUX	244.89815@1.548-rp	#N/A	244.898	1.548	C3H2Cl2N3O2PS	#N/A	#N/A	rp
FAUX	245.92588@0.936-rp	#N/A	245.926	0.936	C4HN4O3P3	#N/A	#N/A	rp
FAUX	245.99618@0.879-rp	#N/A	245.996	0.879	C5H11O7PS	#N/A	#N/A	rp
FAUX	3-(3-sulfooxyphenyl)propanoicacid@7.264-rp	3-(3-sulfooxyphenyl)propanoicacid	246.02	7.264	C9H10O6S	162993	#N/A	rp
FAUX	(R)-3-Tosyloxy-1,2-propanediol@10.706-rp	(R)-3-Tosyloxy-1,2-propanediol	246.056	10.706	C10H14O5S	9588802	#N/A	rp
FAUX	246.06262@1.546-rp	#N/A	246.063	1.546	C6H11N6O3P	#N/A	#N/A	rp
FAUX	N-acetyltryptophan@8.97-rp	N-acetyltryptophan	246.1	8.97	C13H14N2O3	#N/A	#N/A	rp
FAUX	246.11043@10.421-rp	#N/A	246.11	10.421	C11H18O6	#N/A	#N/A	rp
FAUX	Gamma-glutamylvaline@1.789-rp	Gamma-glutamylvaline	246.121	1.789	C10H18N2O5	#N/A	Metabolic pathways;Other	rp
FAUX	Dibutylmalate@10.825-rp	Dibutylmalate	246.147	10.825	C12H22O5	86081	#N/A	rp
FAUX	Dibutylmalate@11.012-rp	Dibutylmalate	246.147	11.012	C12H22O5	86081	#N/A	rp
FAUX	Dibutylmalate@9.247-rp	Dibutylmalate	246.147	9.247	C12H22O5	86081	#N/A	rp
FAUX	Dibutylmalate@10.119-rp	Dibutylmalate	246.147	10.119	C12H22O5	86081	#N/A	rp
FAUX	246.14683@9.784-rp	#N/A	246.147	9.784	C13H26S2	#N/A	#N/A	rp
FAUX	247.08208@1.895-rp	#N/A	247.082	1.895	C9H9N7O2	#N/A	#N/A	rp
FAUX	CarnitineC4:0(OH)@1.421-rp	CarnitineC4:0(OH)	247.142	1.421	C11H21NO5	#N/A	#N/A	rp
FAUX	248.02962@1.022-rp	#N/A	248.03	1.022	C9H15O2P3	#N/A	#N/A	rp
FAUX	248.04238@9.845-rp	#N/A	248.042	9.845	C6H9ClN6O3	#N/A	#N/A	rp
FAUX	248.08372@2.128-rp	#N/A	248.084	2.128	C11H13N4OP	#N/A	Microbial metabolism in diverse environments;Other	rp
FAUX	4-O-Acetyl-2,6-anhydro-1,3,5-tri-O-methylhexitol@7.297-rp	4-O-Acetyl-2,6-anhydro-1,3,5-tri-O-methylhexitol	248.126	7.297	C11H20O6	459064	#N/A	rp
FAUX	4-O-Acetyl-2,6-anhydro-1,3,5-tri-O-methylhexitol@7.823-rp	4-O-Acetyl-2,6-anhydro-1,3,5-tri-O-methylhexitol	248.126	7.823	C11H20O6	459064	#N/A	rp
FAUX	8-Cyclopentyltheophylline@7.411-rp	8-Cyclopentyltheophylline	248.126	7.411	C12H16N4O2	1843	#N/A	rp
FAUX	8-Cyclopentyltheophylline@6.396-rp	8-Cyclopentyltheophylline	248.126	6.396	C12H16N4O2	1843	#N/A	rp
FAUX	8-Cyclopentyltheophylline@6.258-rp	8-Cyclopentyltheophylline	248.126	6.258	C12H16N4O2	1843	#N/A	rp
FAUX	negamycin@1.078-rp	negamycin	248.148	1.078	C9H20N4O4	33506	#N/A	rp
FAUX	3,5-DI-TERT-BUTYL-4-HYDROXYACETOPHENONE@17.719-rp	3,5-DI-TERT-BUTYL-4-HYDROXYACETOPHENONE	248.178	17.719	C16H24O2	535622	#N/A	rp
FAUX	250.0315@1.756-rp	#N/A	250.031	1.756	C8H10O9	#N/A	#N/A	rp
FAUX	perfragilinA@6.508-rp	perfragilinA	250.041	6.508	C11H10N2O3S	140262	#N/A	rp
FAUX	250.09503@8.153-rp	#N/A	250.095	8.153	C14H19PS	#N/A	#N/A	rp
FAUX	4-tert-Octylphenolmonoethoxylate@18.49-rp	4-tert-Octylphenolmonoethoxylate	250.193	18.49	C16H26O2	5388	Other	rp
FAUX	4-tert-Octylphenolmonoethoxylate@18.204-rp	4-tert-Octylphenolmonoethoxylate	250.193	18.204	C16H26O2	5388	Other	rp
FAUX	252.01711@0.927-rp	#N/A	252.017	0.927	C7H15N2P3S	#N/A	#N/A	rp
FAUX	[4-methoxy-6-(1-piperidinyl)-1H-1,3,5-triazin-2-ylidene]-nitrosomethanamine@13.18-rp	[4-methoxy-6-(1-piperidinyl)-1H-1,3,5-triazin-2-ylidene]-nitrosomethanamine	252.134	13.18	C10H16N6O2	10004558	#N/A	rp
FAUX	Hexadecadienoicacid@18.977-rp	Hexadecadienoicacid	252.209	18.977	C16H28O2	#N/A	#N/A	rp
FAUX	254.01674@1.01-rp	#N/A	254.017	1.01	C5H3ClN10O	#N/A	#N/A	rp
FAUX	Menadionebisulfite@9.066-rp	Menadionebisulfite	254.025	9.066	C11H10O5S	8220	#N/A	rp
FAUX	3-[5-(2-Methyl-2H-tetrazol-5-yl)-3-oxo-2,3-dihydro-1,2-oxazol-4-yl]alanine@6.359-rp	3-[5-(2-Methyl-2H-tetrazol-5-yl)-3-oxo-2,3-dihydro-1,2-oxazol-4-yl]alanine	254.077	6.359	C8H10N6O4	2722618	Arginine and proline metabolism	rp
FAUX	254.11313@9.057-rp	#N/A	254.113	9.057	C7H19N4O4P	#N/A	#N/A	rp
FAUX	1957290@9.832-rp	1957290	254.152	9.832	C14H22O4	73148	#N/A	rp
FAUX	1957290@13.328-rp	1957290	254.152	13.328	C14H22O4	73148	#N/A	rp
FAUX	1957290@13.997-rp	1957290	254.152	13.997	C14H22O4	73148	#N/A	rp
FAUX	Palmitoleicacid@19.842-rp	Palmitoleicacid	254.225	19.842	C16H30O2	393216	Other	rp
FAUX	255.0508@1.016-rp	#N/A	255.051	1.016	C4H11Cl2N9	#N/A	#N/A	rp
FAUX	2JWH465TW2@1.4-rp	2JWH465TW2	255.989	1.4	C6H8O9S	18502892	#N/A	rp
FAUX	1-(2,4-Dichloro-phenyl)-2-imidazol-1-yl-ethanol@12.789-rp	1-(2,4-Dichloro-phenyl)-2-imidazol-1-yl-ethanol	256.017	12.789	C11H10Cl2N2O	29896	#N/A	rp
FAUX	2-(P-NITROPHENYL)ADENINE@8.712-rp	2-(P-NITROPHENYL)ADENINE	256.071	8.712	C11H8N6O2	4589048	#N/A	rp
FAUX	Decarbamoylsaxitoxin@10.126-rp	Decarbamoylsaxitoxin	256.129	10.126	C9H16N6O3	19975972	#N/A	rp
FAUX	TRIALLYLPENTAERYTHRITOL@14.689-rp	TRIALLYLPENTAERYTHRITOL	256.167	14.689	C14H24O4	66488	#N/A	rp
FAUX	TRIALLYLPENTAERYTHRITOL@16.485-rp	TRIALLYLPENTAERYTHRITOL	256.167	16.485	C14H24O4	66488	#N/A	rp
FAUX	TRIALLYLPENTAERYTHRITOL@13.784-rp	TRIALLYLPENTAERYTHRITOL	256.167	13.784	C14H24O4	66488	#N/A	rp
FAUX	TRIALLYLPENTAERYTHRITOL@13.121-rp	TRIALLYLPENTAERYTHRITOL	256.167	13.121	C14H24O4	66488	#N/A	rp
FAUX	TRIALLYLPENTAERYTHRITOL@14.232-rp	TRIALLYLPENTAERYTHRITOL	256.167	14.232	C14H24O4	66488	#N/A	rp
FAUX	Myristicacidethylester@20.969-rp	Myristicacidethylester	256.24	20.969	C16H32O2	#N/A	Metabolic pathways;Biosynthesis of plant secondary metabolites;Other	rp
FAUX	256.82956@1.21-rp	#N/A	256.83	1.21	CHCl3NO2P3	#N/A	#N/A	rp
FAUX	256.97443@1.005-rp	#N/A	256.974	1.005	C9H8NO2PS2	#N/A	#N/A	rp
FAUX	257.06657@1.068-rp	#N/A	257.067	1.068	C8H16ClNO6	#N/A	Metabolic pathways;Biosynthesis of secondary metabolites;Other	rp
FAUX	Glycerophosphorylcholine@1.011-rp	Glycerophosphorylcholine	257.102	1.011	C8H20NO6P	#N/A	#N/A	rp
FAUX	257.17058@13.115-rp	#N/A	257.171	13.115	C8H19N9O	#N/A	#N/A	rp
FAUX	258.06182@1.052-rp	#N/A	258.062	1.052	C7H15ClN2O6	#N/A	#N/A	rp
FAUX	Octyl-oxoglutaricacid@9.197-rp	Octyl-oxoglutaricacid	258.147	9.197	C13H22O5	#N/A	#N/A	rp
FAUX	5-(Adamantan-1-yl)-6-methyl-2,4-pyrimidinediamine@12.391-rp	5-(Adamantan-1-yl)-6-methyl-2,4-pyrimidinediamine	258.183	12.391	C15H22N4	57859	#N/A	rp
FAUX	Tetradecanedioicacid@14.543-rp	Tetradecanedioicacid	258.183	14.543	C14H26O4	12630	#N/A	rp
FAUX	258.81831@1.046-rp	#N/A	258.818	1.046	CH2Cl3NP2S2	#N/A	#N/A	rp
FAUX	CarnitineC6:0@7.512-rp	CarnitineC6:0	259.178	7.512	C13H25NO4	#N/A	#N/A	rp
FAUX	259.99923@7.164-rp	#N/A	259.999	7.164	C10H4N4O3S	#N/A	#N/A	rp
FAUX	Caffeicacid3-sulfate@7.664-rp	Caffeicacid3-sulfate	259.999	7.664	C9H8O7S	30777605	#N/A	rp
FAUX	260.02443@9.902-rp	#N/A	260.024	9.902	C9H10Cl2N4O	#N/A	Other	rp
FAUX	260.0295@1.04-rp	#N/A	260.029	1.04	C9H4N6O4	#N/A	Metabolic pathways;Biosynthesis of secondary metabolites;Microbial metabolism in diverse environments;Biosynthesis of plant secondary metabolites;Biosynthesis of amino acids;Biosynthesis of alkaloids derived from shikimate pathway;ABC transporters;Biosynthesis of phenylpropanoids;Biosynthesis of plant hormones;Central carbon metabolism in cancer;Biosynthesis of alkaloids derived from ornithine, l…	rp
FAUX	260.03444@9.842-rp	#N/A	260.034	9.842	C12H9N2O3P	#N/A	#N/A	rp
FAUX	MethylN-acetyltryptophanate@7.728-rp	MethylN-acetyltryptophanate	260.116	7.728	C14H16N2O3	92440	#N/A	rp
FAUX	LZ4958000@8.151-rp	LZ4958000	260.126	8.151	C12H20O6	5422684	#N/A	rp
FAUX	LZ4958000@11.287-rp	LZ4958000	260.126	11.287	C12H20O6	5422684	#N/A	rp
FAUX	Gamma-glutamylisoleucine@3.228-rp	Gamma-glutamylisoleucine	260.137	3.228	C11H20N2O5	#N/A	#N/A	rp
FAUX	Methyl(6-methoxy-6-pentyl-1,2-dioxan-3-yl)acetate@11.836-rp	Methyl(6-methoxy-6-pentyl-1,2-dioxan-3-yl)acetate	260.162	11.836	C13H24O5	8213801	#N/A	rp
FAUX	Methyl(6-methoxy-6-pentyl-1,2-dioxan-3-yl)acetate@12.108-rp	Methyl(6-methoxy-6-pentyl-1,2-dioxan-3-yl)acetate	260.162	12.108	C13H24O5	8213801	#N/A	rp
FAUX	Methyl(6-methoxy-6-pentyl-1,2-dioxan-3-yl)acetate@10.772-rp	Methyl(6-methoxy-6-pentyl-1,2-dioxan-3-yl)acetate	260.162	10.772	C13H24O5	8213801	#N/A	rp
FAUX	Methyl(6-methoxy-6-pentyl-1,2-dioxan-3-yl)acetate@10.024-rp	Methyl(6-methoxy-6-pentyl-1,2-dioxan-3-yl)acetate	260.163	10.024	C13H24O5	8213801	#N/A	rp
FAUX	Methyl(6-methoxy-6-pentyl-1,2-dioxan-3-yl)acetate@11.121-rp	Methyl(6-methoxy-6-pentyl-1,2-dioxan-3-yl)acetate	260.163	11.121	C13H24O5	8213801	#N/A	rp
FAUX	260.81557@1.035-rp	#N/A	260.816	1.035	#N/A	#N/A	#N/A	rp
FAUX	260.902@1.044-rp	#N/A	260.902	1.044	C7H5BrNOPS	#N/A	#N/A	rp
FAUX	260.96927@1.281-rp	#N/A	260.969	1.281	C6H3N3O7S	#N/A	#N/A	rp
FAUX	260.96949@1.408-rp	#N/A	260.969	1.408	C6H3N3O7S	#N/A	#N/A	rp
FAUX	261.0614@5.981-rp	#N/A	261.061	5.981	C9H7N7O3	#N/A	#N/A	rp
FAUX	261.06479@1.216-rp	#N/A	261.065	1.216	C14H15NS2	#N/A	#N/A	rp
FAUX	5-oxo-3-(4-phenylphenyl)-2H-furan-4-carbonitrile@2.13-rp	5-oxo-3-(4-phenylphenyl)-2H-furan-4-carbonitrile	261.079	2.13	C17H11NO2	2045152	#N/A	rp
FAUX	Tris(2-hydroxyethyl)Isocyanurate@2.785-rp	Tris(2-hydroxyethyl)Isocyanurate	261.096	2.785	C9H15N3O6	12726	#N/A	rp
FAUX	261.97406@0.885-rp	#N/A	261.974	0.885	C5H3N4O7P	#N/A	#N/A	rp
FAUX	261.98312@0.919-rp	#N/A	261.983	0.919	C8H3N6OPS	#N/A	#N/A	rp
FAUX	261.98652@1.009-rp	#N/A	261.987	1.009	C4H8Cl2N4O5	#N/A	#N/A	rp
FAUX	Homovanillicacidsulfate@5.503-rp	Homovanillicacidsulfate	262.015	5.503	C9H10O7S	21896746	#N/A	rp
FAUX	262.03679@1.544-rp	#N/A	262.037	1.544	C6H14O9S	#N/A	#N/A	rp
FAUX	(1,2-Phenylenediphosphinetriyl)tetramethanol@11.664-rp	(1,2-Phenylenediphosphinetriyl)tetramethanol	262.051	11.664	C10H16O4P2	8094069	#N/A	rp
FAUX	glu-asp@1.412-rp	glu-asp	262.08	1.412	C9H14N2O7	90091	#N/A	rp
FAUX	D-Mannitoldiacetonide@8.218-rp	D-Mannitoldiacetonide	262.142	8.218	C12H22O6	86677	#N/A	rp
FAUX	11-Phenylundecanoicacid@16.106-rp	11-Phenylundecanoicacid	262.193	16.106	C17H26O2	69314	#N/A	rp
FAUX	1913256@19.323-rp	1913256	262.23	19.323	C18H30O	12368	#N/A	rp
FAUX	1913256@20.363-rp	1913256	262.23	20.363	C18H30O	12368	#N/A	rp
FAUX	262.94917@1.392-rp	#N/A	262.949	1.392	C5H3N3O6P2	#N/A	#N/A	rp
FAUX	262.98515@1.27-rp	#N/A	262.985	1.27	C6H7N3O5P2	#N/A	#N/A	rp
FAUX	263.05611@1.896-rp	#N/A	263.056	1.896	C9H14NO6P	#N/A	#N/A	rp
FAUX	263.07704@1.457-rp	#N/A	263.077	1.457	C9H9N7O3	#N/A	#N/A	rp
FAUX	1-Aza-18-crown-6@10.921-rp	1-Aza-18-crown-6	263.173	10.921	C12H25NO5	105979	#N/A	rp
FAUX	264.04219@1.296-rp	#N/A	264.042	1.296	C10H17O2PS2	#N/A	#N/A	rp
FAUX	KoiganalII@20.257-rp	KoiganalII	264.245	20.257	C18H32O	8079055	#N/A	rp
FAUX	265.99589@1.746-rp	#N/A	265.996	1.746	C6H2N8O3S	#N/A	#N/A	rp
FAUX	266.06386@1.225-rp	#N/A	266.064	1.225	C6H16N6P2S	#N/A	#N/A	rp
FAUX	1,1'-MONOGLYCERIDECITRATE@1.386-rp	1,1'-MONOGLYCERIDECITRATE	266.064	1.386	C9H14O9	2298434	#N/A	rp
FAUX	hydroprene@19.673-rp	hydroprene	266.225	19.673	C17H30O2	4522732	#N/A	rp
FAUX	267.078@9.845-rp	#N/A	267.078	9.845	C9H19NO4P2	#N/A	Metabolic pathways;Biosynthesis of amino acids;Other	rp
FAUX	2-deoxyguanosine@4.299-rp	2-deoxyguanosine	267.096	4.299	C10H13N5O4	#N/A	Metabolic pathways;ABC transporters;Other	rp
FAUX	267.81135@0.982-rp	#N/A	267.811	0.982	#N/A	#N/A	#N/A	rp
FAUX	267.99085@0.927-rp	#N/A	267.991	0.927	C6H9N2O6PS	#N/A	#N/A	rp
FAUX	268.00189@7.265-rp	#N/A	268.002	7.265	C8H15O2P3S	#N/A	#N/A	rp
FAUX	Inosine@2.436-rp	Inosine	268.081	2.436	C10H12N4O5	#N/A	Metabolic pathways;ABC transporters;Other	rp
FAUX	268.09242@7.557-rp	#N/A	268.092	7.557	C10H23O2P3	#N/A	#N/A	rp
FAUX	5,5-bis(aminomethyl)-3-oxohexylmethanethiosulfonate@8.114-rp	5,5-bis(aminomethyl)-3-oxohexylmethanethiosulfonate	268.092	8.114	C9H20N2O3S2	21378768	#N/A	rp
FAUX	268.12823@11.018-rp	#N/A	268.128	11.018	C10H16N6O3	#N/A	#N/A	rp
FAUX	ZR-725@16.753-rp	ZR-725	268.204	16.753	C16H28O3	4510207	#N/A	rp
FAUX	Heptadecenoicacid@20.588-rp	Heptadecenoicacid	268.24	20.588	C17H32O2	#N/A	#N/A	rp
FAUX	269.03485@8.462-rp	#N/A	269.035	8.462	C7H9N7OP2	#N/A	#N/A	rp
FAUX	269.80823@0.99-rp	#N/A	269.808	0.99	#N/A	#N/A	#N/A	rp
FAUX	269.959@1.02-rp	#N/A	269.959	1.02	C3H5ClN6O3P2	#N/A	#N/A	rp
FAUX	270.00597@1.664-rp	#N/A	270.006	1.664	C8H16O2P2S2	#N/A	#N/A	rp
FAUX	270.09522@1.262-rp	#N/A	270.095	1.262	C9H18O9	#N/A	#N/A	rp
FAUX	270.14625@9.886-rp	#N/A	270.146	9.886	C14H22O5	#N/A	#N/A	rp
FAUX	270.1466@9.892-rp	#N/A	270.147	9.892	C14H22O5	#N/A	#N/A	rp
FAUX	2-[4-(4-Methoxyphenyl)-1-piperazinyl]pyrimidine@10.742-rp	2-[4-(4-Methoxyphenyl)-1-piperazinyl]pyrimidine	270.148	10.742	C15H18N4O	172248	#N/A	rp
FAUX	3543@13.79-rp	3543	270.183	13.79	C15H26O4	54974	Other	rp
FAUX	3543@14.069-rp	3543	270.183	14.069	C15H26O4	54974	Other	rp
FAUX	271.08227@10.936-rp	#N/A	271.082	10.936	C11H9N7O2	#N/A	#N/A	rp
FAUX	271.80562@0.983-rp	#N/A	271.806	0.983	#N/A	#N/A	#N/A	rp
FAUX	271.96191@11.097-rp	#N/A	271.962	11.097	C9H9BrN2OS	#N/A	#N/A	rp
FAUX	272.07193@0.915-rp	#N/A	272.072	0.915	C4H12N6O8	#N/A	#N/A	rp
FAUX	272.16206@9.836-rp	#N/A	272.162	9.836	C14H24O5	#N/A	#N/A	rp
FAUX	272.16209@10.004-rp	#N/A	272.162	10.004	C14H24O5	#N/A	#N/A	rp
FAUX	272.16264@12.548-rp	#N/A	272.163	12.548	C14H24O5	#N/A	#N/A	rp
FAUX	273.17608@11.694-rp	#N/A	273.176	11.694	C14H27NO2S	#N/A	#N/A	rp
FAUX	Ferulicacid4-sulfate@8.229-rp	Ferulicacid4-sulfate	274.015	8.229	C10H10O7S	4878542	#N/A	rp
FAUX	3-Hydroxytetradecanedioicacid@14.236-rp	3-Hydroxytetradecanedioicacid	274.178	14.236	C14H26O5	13628077	#N/A	rp
FAUX	3-Hydroxytetradecanedioicacid@12.833-rp	3-Hydroxytetradecanedioicacid	274.178	12.833	C14H26O5	13628077	#N/A	rp
FAUX	4,6-Dimethyl-2-{[3-(4-morpholinyl)propyl]amino}nicotinonitrile@12.065-rp	4,6-Dimethyl-2-{[3-(4-morpholinyl)propyl]amino}nicotinonitrile	274.178	12.065	C15H22N4O	1523945	#N/A	rp
FAUX	3-Hydroxytetradecanedioicacid@13.134-rp	3-Hydroxytetradecanedioicacid	274.178	13.134	C14H26O5	13628077	#N/A	rp
FAUX	Gamma-glutamylglutamine@1.094-rp	Gamma-glutamylglutamine	275.112	1.094	C10H17N3O6	#N/A	#N/A	rp
FAUX	275.64467@17.182-rp	#N/A	275.645	17.182	#N/A	#N/A	#N/A	rp
FAUX	275.98088@1.381-rp	#N/A	275.981	1.381	C8HN6O4P	#N/A	#N/A	rp
FAUX	3-[3-Methoxy-4-(sulfooxy)phenyl]propanoicacid@7.492-rp	3-[3-Methoxy-4-(sulfooxy)phenyl]propanoicacid	276.031	7.492	C10H12O7S	162994	#N/A	rp
FAUX	Triethylcitrate@8.259-rp	Triethylcitrate	276.121	8.259	C12H20O7	13850879	#N/A	rp
FAUX	ascr#1@9.197-rp	ascr#1	276.158	9.197	C13H24O6	9646210	Metabolic pathways;Arginine and proline metabolism	rp
FAUX	Stearidonicacid@17.194-rp	Stearidonicacid	276.208	17.194	C18H28O2	4471933	Biosynthesis of secondary metabolites;alpha-Linolenic acid metabolism	rp
FAUX	Stearidonicacid@18.906-rp	Stearidonicacid	276.209	18.906	C18H28O2	4471933	Biosynthesis of secondary metabolites;alpha-Linolenic acid metabolism	rp
FAUX	277.00112@1.561-rp	#N/A	277.001	1.561	C7H9N3O5P2	#N/A	#N/A	rp
FAUX	277.03745@2.132-rp	#N/A	277.037	2.132	C8H13N3O4P2	#N/A	Other	rp
FAUX	277.56499@1.405-rp	#N/A	277.565	1.405	#N/A	#N/A	#N/A	rp
FAUX	278.03114@1.007-rp	#N/A	278.031	1.007	C3H8N10O2P2	#N/A	#N/A	rp
FAUX	278.04011@1.037-rp	#N/A	278.04	1.037	C6H15O10P	#N/A	#N/A	rp
FAUX	EthylL-gamma-glutamyl-L-cysteinate@1.929-rp	EthylL-gamma-glutamyl-L-cysteinate	278.093	1.929	C10H18N2O5S	106601	#N/A	rp
FAUX	beta-D-Glucopyranoside,1-ethoxy-3-butenyl@6.905-rp	beta-D-Glucopyranoside,1-ethoxy-3-butenyl	278.137	6.905	C12H22O7	4447132	#N/A	rp
FAUX	Crepenynicacid@17.301-rp	Crepenynicacid	278.224	17.301	C18H30O2	#N/A	Metabolic pathways;Biosynthesis of secondary metabolites;Biosynthesis of plant secondary metabolites;Biosynthesis of plant hormones;alpha-Linolenic acid metabolism;Other	rp
FAUX	Crepenynicacid@15.6-rp	Crepenynicacid	278.224	15.6	C18H30O2	#N/A	Metabolic pathways;Biosynthesis of secondary metabolites;Biosynthesis of plant secondary metabolites;Biosynthesis of plant hormones;alpha-Linolenic acid metabolism;Other	rp
FAUX	Crepenynicacid@19.599-rp	Crepenynicacid	278.224	19.599	C18H30O2	#N/A	Metabolic pathways;Biosynthesis of secondary metabolites;Biosynthesis of plant secondary metabolites;Biosynthesis of plant hormones;alpha-Linolenic acid metabolism;Other	rp
FAUX	279.05101@1.456-rp	#N/A	279.051	1.456	C12H5N7O2	#N/A	#N/A	rp
FAUX	279.6471@17.669-rp	#N/A	279.647	17.669	#N/A	#N/A	#N/A	rp
FAUX	9,11-octadecadienoicacid@17.734-rp	9,11-octadecadienoicacid	280.24	17.734	C18H32O2	#N/A	Metabolic pathways;Biosynthesis of plant secondary metabolites;Other	rp
FAUX	9,11-octadecadienoicacid@20.364-rp	9,11-octadecadienoicacid	280.24	20.364	C18H32O2	#N/A	Metabolic pathways;Biosynthesis of plant secondary metabolites;Other	rp
FAUX	280.9152@1.347-rp	#N/A	280.915	1.347	C6H4ClN3O2S3	#N/A	#N/A	rp
FAUX	281.03474@7.556-rp	#N/A	281.035	7.556	C16H11NS2	#N/A	#N/A	rp
FAUX	281.03481@8.11-rp	#N/A	281.035	8.11	C8H17N3P2S2	#N/A	#N/A	rp
FAUX	281.98599@0.947-rp	#N/A	281.986	0.947	C4H14ClN2O4P3	#N/A	#N/A	rp
FAUX	282.04241@9.84-rp	#N/A	282.042	9.84	C4H13N8OP3	#N/A	#N/A	rp
FAUX	282.14416@12.136-rp	#N/A	282.144	12.136	C11H18N6O3	#N/A	#N/A	rp
FAUX	13-octadecenoicacid@21.307-rp	13-octadecenoicacid	282.256	21.307	C18H34O2	#N/A	Biosynthesis of plant secondary metabolites;Other	rp
FAUX	283.05036@9.844-rp	#N/A	283.05	9.844	C14H10N3O2P	#N/A	#N/A	rp
FAUX	283.09155@2.614-rp	#N/A	283.092	2.614	C9H17NO9	#N/A	Metabolic pathways;ABC transporters;Other	rp
FAUX	283.78517@0.985-rp	#N/A	283.785	0.985	#N/A	#N/A	#N/A	rp
FAUX	283.95559@0.923-rp	#N/A	283.956	0.923	C5H2N8OP2S	#N/A	#N/A	rp
FAUX	283.96471@0.932-rp	#N/A	283.965	0.932	C9H5N2O5PS	#N/A	#N/A	rp
FAUX	284.03576@0.85-rp	#N/A	284.036	0.85	C7H15ClN4O2P2	#N/A	#N/A	rp
FAUX	284.06636@8.113-rp	#N/A	284.066	8.113	C9H17O8P	#N/A	#N/A	rp
FAUX	284.06637@7.556-rp	#N/A	284.066	7.556	C12H18N2P2S	#N/A	#N/A	rp
FAUX	Xanthosine@3.248-rp	Xanthosine	284.076	3.248	C10H12N4O6	58484	Metabolic pathways;Biosynthesis of secondary metabolites;ABC transporters;Other	rp
FAUX	N-(6-Methoxy-3-pyridinyl)-7-methyl[1,2,4]triazolo[1,5-a]pyrimidine-2-carboxamide@11.013-rp	N-(6-Methoxy-3-pyridinyl)-7-methyl[1,2,4]triazolo[1,5-a]pyrimidine-2-carboxamide	284.102	11.013	C13H12N6O2	4059889	#N/A	rp
FAUX	1-Aminoadenosine@8.212-rp	1-Aminoadenosine	284.123	8.212	C10H16N6O4	389840	#N/A	rp
FAUX	284.12328@8.476-rp	#N/A	284.123	8.476	C12H21N4PS	#N/A	#N/A	rp
FAUX	DODECENYLSUCCINICACID@14.717-rp	DODECENYLSUCCINICACID	284.199	14.717	C16H28O4	4576472	Other	rp
FAUX	Pregna-1,4-diene@20.278-rp	Pregna-1,4-diene	284.25	20.278	C21H32	13906104	#N/A	rp
FAUX	284.63802@13.86-rp	#N/A	284.638	13.86	#N/A	#N/A	#N/A	rp
FAUX	285.78234@0.984-rp	#N/A	285.782	0.984	#N/A	#N/A	#N/A	rp
FAUX	Diphenolglucuronide@1.755-rp	Diphenolglucuronide	286.069	1.755	C12H14O8	30778502	#N/A	rp
FAUX	N-(Sulfanylacetyl)glycylhistidine@9.844-rp	N-(Sulfanylacetyl)glycylhistidine	286.073	9.844	C10H14N4O4S	18823178	#N/A	rp
FAUX	286.08155@9.846-rp	#N/A	286.082	9.846	C6H11N10O2P	#N/A	#N/A	rp
FAUX	286.093@3.061-rp	#N/A	286.093	3.061	C12H21N2P3	#N/A	#N/A	rp
FAUX	286.10297@7.5-rp	#N/A	286.103	7.5	C9H14N6O5	#N/A	#N/A	rp
FAUX	Hexadecanedioicacid@16.605-rp	Hexadecanedioicacid	286.214	16.605	C16H30O4	#N/A	Metabolic pathways;Other	rp
FAUX	286.62535@16.713-rp	#N/A	286.625	16.713	#N/A	#N/A	#N/A	rp
FAUX	286.94865@1.407-rp	#N/A	286.949	1.407	C9H8NO2P3S	#N/A	#N/A	rp
FAUX	287.04616@9.849-rp	#N/A	287.046	9.849	C7H11N7O2P2	#N/A	#N/A	rp
FAUX	287.97753@1.058-rp	#N/A	287.978	1.058	C4H10ClN6OPS2	#N/A	Other	rp
FAUX	288.02388@5.329-rp	#N/A	288.024	5.329	C10H12N2O4S2	#N/A	Metabolic pathways;Biosynthesis of secondary metabolites;Biosynthesis of amino acids;Biosynthesis of plant hormones;Other	rp
FAUX	ascr#13@9.885-rp	ascr#13	288.157	9.885	C14H24O6	31150605	#N/A	rp
FAUX	288.15722@10.176-rp	#N/A	288.157	10.176	C15H28OS2	#N/A	#N/A	rp
FAUX	288.15727@9.769-rp	#N/A	288.157	9.769	C9H21N8OP	#N/A	#N/A	rp
FAUX	ascr#13@12.347-rp	ascr#13	288.157	12.347	C14H24O6	31150605	#N/A	rp
FAUX	(2S)-3-Hydroxy-1,2-propanediyldihexanoate@13.789-rp	(2S)-3-Hydroxy-1,2-propanediyldihexanoate	288.194	13.789	C15H28O5	8644800	#N/A	rp
FAUX	(2S)-3-Hydroxy-1,2-propanediyldihexanoate@14.071-rp	(2S)-3-Hydroxy-1,2-propanediyldihexanoate	288.194	14.071	C15H28O5	8644800	#N/A	rp
FAUX	289.05573@0.914-rp	#N/A	289.056	0.914	C7H16NO9P	#N/A	#N/A	rp
FAUX	290.04612@8.543-rp	#N/A	290.046	8.543	C15H16P2S	#N/A	#N/A	rp
FAUX	290.05657@0.915-rp	#N/A	290.057	0.915	C11H15O7P	#N/A	#N/A	rp
FAUX	290.11011@10.997-rp	#N/A	290.11	10.997	C7H14N8O5	#N/A	Metabolic pathways;Microbial metabolism in diverse environments;Biosynthesis of amino acids;Other	rp
FAUX	290.11019@11.114-rp	#N/A	290.11	11.114	C7H14N8O5	#N/A	Metabolic pathways;Microbial metabolism in diverse environments;Biosynthesis of amino acids;Other	rp
FAUX	3-O-Acetyl-2,6-anhydro-1,4,5-tri-O-ethylhexitol@9.836-rp	3-O-Acetyl-2,6-anhydro-1,4,5-tri-O-ethylhexitol	290.173	9.836	C14H26O6	34995581	#N/A	rp
FAUX	3-O-Acetyl-2,6-anhydro-1,4,5-tri-O-ethylhexitol@10.005-rp	3-O-Acetyl-2,6-anhydro-1,4,5-tri-O-ethylhexitol	290.173	10.005	C14H26O6	34995581	#N/A	rp
FAUX	291.0128@1.007-rp	#N/A	291.013	1.007	C5H11Cl2N5O5	#N/A	#N/A	rp
FAUX	291.93305@1.28-rp	#N/A	291.933	1.28	CHN4O12P	#N/A	#N/A	rp
FAUX	292.01463@0.908-rp	#N/A	292.015	0.908	C5H15N2O6P3	#N/A	Other	rp
FAUX	292.08984@9.854-rp	#N/A	292.09	9.854	C8H19N6P3	#N/A	#N/A	rp
FAUX	292.99552@1.279-rp	#N/A	292.996	1.279	C9H12NO4PS2	#N/A	#N/A	rp
FAUX	293.07942@1.031-rp	#N/A	293.079	1.031	C11H12ClN7O	#N/A	#N/A	rp
FAUX	1,2-di-O-methyl-4-[(2R)-2,4-dihydrobutyramido]-4,6-dideoxy-alpha-D-mannopyranoside@1.432-rp	1,2-di-O-methyl-4-[(2R)-2,4-dihydrobutyramido]-4,6-dideoxy-alpha-D-mannopyranoside	293.147	1.432	C12H23NO7	393130	#N/A	rp
FAUX	293.82583@0.974-rp	#N/A	293.826	0.974	CH3Cl3O5P2S	#N/A	#N/A	rp
FAUX	294.00387@1.005-rp	#N/A	294.004	1.005	C9H10O9S	#N/A	#N/A	rp
FAUX	294.12123@4.508-rp	#N/A	294.121	4.508	C16H23OPS	#N/A	Other	rp
FAUX	13(S)-HOT@17.191-rp	13(S)-HOT	294.219	17.191	C18H30O3	#N/A	Metabolic pathways;Biosynthesis of secondary metabolites;Biosynthesis of plant hormones;alpha-Linolenic acid metabolism;Other	rp
FAUX	13(S)-HOT@17.631-rp	13(S)-HOT	294.22	17.631	C18H30O3	#N/A	Metabolic pathways;Biosynthesis of secondary metabolites;Biosynthesis of plant hormones;alpha-Linolenic acid metabolism;Other	rp
FAUX	(E)-Dosulepin@17.192-rp	(E)-Dosulepin	295.139	17.192	C19H21NS	4447605	#N/A	rp
FAUX	amicarbalide@17.186-rp	amicarbalide	296.139	17.186	C15H16N6O	65060	#N/A	rp
FAUX	296.15995@12.853-rp	#N/A	296.16	12.853	C12H20N6O3	#N/A	#N/A	rp
FAUX	12(13)-EpOME@18.024-rp	12(13)-EpOME	296.235	18.024	C18H32O3	#N/A	Metabolic pathways;Other	rp
FAUX	12(13)-EpOME@16.74-rp	12(13)-EpOME	296.235	16.74	C18H32O3	#N/A	Metabolic pathways;Other	rp
FAUX	12(13)-EpOME@17.303-rp	12(13)-EpOME	296.235	17.303	C18H32O3	#N/A	Metabolic pathways;Other	rp
FAUX	Nonadecenoicacid@22.012-rp	Nonadecenoicacid	296.271	22.012	C19H36O2	#N/A	#N/A	rp
FAUX	297.05432@1.017-rp	#N/A	297.054	1.017	C5H14ClN9P2	#N/A	#N/A	rp
FAUX	297.09341@1.09-rp	#N/A	297.093	1.09	C7H15N5O8	#N/A	#N/A	rp
FAUX	297.16304@12.832-rp	#N/A	297.163	12.832	C12H29NO3P2	#N/A	#N/A	rp
FAUX	298.13895@9.194-rp	#N/A	298.139	9.194	C11H18N6O4	#N/A	#N/A	rp
FAUX	298.13911@13.125-rp	#N/A	298.139	13.125	C11H18N6O4	#N/A	#N/A	rp
FAUX	18-hydroxyoleicacid@17.733-rp	18-hydroxyoleicacid	298.251	17.733	C18H34O3	4472198	Other	rp
FAUX	299.02158@7.556-rp	#N/A	299.022	7.556	C12H6N5O3P	#N/A	#N/A	rp
FAUX	299.02165@8.114-rp	#N/A	299.022	8.114	C8H14NO7PS	#N/A	#N/A	rp
FAUX	299.19171@12.515-rp	#N/A	299.192	12.515	C16H29NO2S	#N/A	#N/A	rp
FAUX	3-Hydroxy-N-[(3S)-2-oxotetrahydro-3-furanyl]dodecanamide@10.295-rp	3-Hydroxy-N-[(3S)-2-oxotetrahydro-3-furanyl]dodecanamide	299.209	10.295	C16H29NO4	9067166	#N/A	rp
FAUX	299.2571@10.371-rp	#N/A	299.257	10.371	C16H33N3O2	#N/A	#N/A	rp
FAUX	299.62563@16.758-rp	#N/A	299.626	16.758	#N/A	#N/A	#N/A	rp
FAUX	299.93867@0.935-rp	#N/A	299.939	0.935	C6H8ClN2O4P3	#N/A	#N/A	rp
FAUX	300.06567@10.992-rp	#N/A	300.066	10.992	C15H13N2O3P	#N/A	#N/A	rp
FAUX	300.11843@8.938-rp	#N/A	300.118	8.938	C11H27O3P3	#N/A	#N/A	rp
FAUX	2,4,6-tri-tert-butyl-1,3,5-triphosphabenzene@0.936-rp	2,4,6-tri-tert-butyl-1,3,5-triphosphabenzene	300.133	0.936	C15H27P3	9099808	#N/A	rp
FAUX	4-oxoretinol@17.106-rp	4-oxoretinol	300.209	17.106	C20H28O2	#N/A	Metabolic pathways;Biosynthesis of secondary metabolites;Other	rp
FAUX	2-hydroxystearicacid@20.218-rp	2-hydroxystearicacid	300.266	20.218	C18H36O3	#N/A	#N/A	rp
FAUX	300.88725@0.991-rp	#N/A	300.887	0.991	CHClNO13P	#N/A	#N/A	rp
FAUX	301.02318@1.451-rp	#N/A	301.023	1.451	C8H18NO3P3S	#N/A	#N/A	rp
FAUX	301.03701@9.844-rp	#N/A	301.037	9.844	C10H11N3O6S	#N/A	#N/A	rp
FAUX	302.04498@9.844-rp	#N/A	302.045	9.844	C6H17N4O4P3	#N/A	#N/A	rp
FAUX	302.06673@3.059-rp	#N/A	302.067	3.059	C9H18O9S	#N/A	#N/A	rp
FAUX	butyrin@13.044-rp	butyrin	302.173	13.044	C15H26O6	13849665	#N/A	rp
FAUX	Gemcabene@14.699-rp	Gemcabene	302.209	14.699	C16H30O5	138760	#N/A	rp
FAUX	Eicosapentaenoicacid@17.783-rp	Eicosapentaenoicacid	302.224	17.783	C20H30O2	4941649	Metabolic pathways;Biosynthesis of secondary metabolites;Other	rp
FAUX	Eicosapentaenoicacid@19.598-rp	Eicosapentaenoicacid	302.224	19.598	C20H30O2	4941649	Metabolic pathways;Biosynthesis of secondary metabolites;Other	rp
FAUX	302.96429@1.402-rp	#N/A	302.964	1.402	C9HN7O2S2	#N/A	#N/A	rp
FAUX	304.04507@9.845-rp	#N/A	304.045	9.845	C13H18ClO2PS	#N/A	#N/A	rp
FAUX	304.10503@11.085-rp	#N/A	304.105	11.085	C10H17ClN6O3	#N/A	#N/A	rp
FAUX	304.10508@10.994-rp	#N/A	304.105	10.994	C10H17ClN6O3	#N/A	#N/A	rp
FAUX	304.13806@1.243-rp	#N/A	304.138	1.243	C12H16N8O2	#N/A	ABC transporters;Arginine and proline metabolism	rp
FAUX	Arachidonicacid@20.318-rp	Arachidonicacid	304.24	20.318	C20H32O2	392692	Metabolic pathways;Biosynthesis of secondary metabolites;Other	rp
FAUX	304.92805@1.022-rp	#N/A	304.928	1.022	C5H5Cl2N3O6S	#N/A	#N/A	rp
FAUX	304.95921@1.406-rp	#N/A	304.959	1.406	C7H5N3O7P2	#N/A	#N/A	rp
FAUX	304.95946@1.286-rp	#N/A	304.959	1.286	C7H5N3O7P2	#N/A	#N/A	rp
FAUX	305.07778@1.014-rp	#N/A	305.078	1.014	C8H19NO9S	#N/A	#N/A	rp
FAUX	N-[3-Chloro-4-(4-morpholinyl)phenyl]-2-furamide@1.428-rp	N-[3-Chloro-4-(4-morpholinyl)phenyl]-2-furamide	306.076	1.428	C15H15ClN2O3	569579	#N/A	rp
FAUX	306.08403@10.997-rp	#N/A	306.084	10.997	C10H20N4OP2S	#N/A	#N/A	rp
FAUX	306.10547@11.065-rp	#N/A	306.105	11.065	C13H25O2P3	#N/A	Metabolic pathways;Biosynthesis of secondary metabolites;Other	rp
FAUX	306.18028@17.577-rp	#N/A	306.18	17.577	C13H26N2O6	#N/A	#N/A	rp
FAUX	Dihomo-linolenicacid@20.902-rp	Dihomo-linolenicacid	306.256	20.902	C20H34O2	#N/A	Metabolic pathways;Biosynthesis of secondary metabolites;Other	rp
FAUX	308.04197@1.285-rp	#N/A	308.042	1.285	C10H9N6O4P	#N/A	Metabolic pathways;Pyrimidine metabolism;Other	rp
FAUX	308.06344@9.848-rp	#N/A	308.063	9.848	C10H12N8S2	#N/A	#N/A	rp
FAUX	308.15784@0.887-rp	#N/A	308.158	0.887	C9H24N8S2	#N/A	Other	rp
FAUX	308.19632@18.523-rp	#N/A	308.196	18.523	C15H35P3	#N/A	#N/A	rp
FAUX	308.19637@18.316-rp	#N/A	308.196	18.316	C12H29N4O3P	#N/A	#N/A	rp
FAUX	Eicosadienoicacid@21.732-rp	Eicosadienoicacid	308.271	21.732	C20H36O2	#N/A	Biosynthesis of secondary metabolites;Other	rp
FAUX	N-acetylneuraminicacid@1.097-rp	N-acetylneuraminicacid	309.106	1.097	C11H19NO9	#N/A	Metabolic pathways;Other	rp
FAUX	310.11151@0.891-rp	#N/A	310.112	0.891	C7H21N8P3	#N/A	#N/A	rp
FAUX	Gamma-glutamyltyrosine@2.778-rp	Gamma-glutamyltyrosine	310.116	2.778	C14H18N2O6	#N/A	#N/A	rp
FAUX	310.21183@19.405-rp	#N/A	310.212	19.405	C14H26N6O2	#N/A	#N/A	rp
FAUX	11-eicosenoicacid@22.691-rp	11-eicosenoicacid	310.287	22.691	C20H38O2	#N/A	Other	rp
FAUX	311.62561@16.833-rp	#N/A	311.626	16.833	#N/A	#N/A	#N/A	rp
FAUX	311.97649@1.384-rp	#N/A	311.976	1.384	C11H4O11	#N/A	#N/A	rp
FAUX	312.15442@9.835-rp	#N/A	312.154	9.835	C12H20N6O4	#N/A	#N/A	rp
FAUX	(5S,8R)-DiHODE@17.192-rp	(5S,8R)-DiHODE	312.23	17.192	C18H32O4	#N/A	Metabolic pathways;Biosynthesis of secondary metabolites;alpha-Linolenic acid metabolism;Other	rp
FAUX	313.15795@9.837-rp	#N/A	313.158	9.837	C13H23N5O2S	#N/A	#N/A	rp
FAUX	314.05898@1.284-rp	#N/A	314.059	1.284	C8H14N2O11	#N/A	#N/A	rp
FAUX	DMCM@12.652-rp	DMCM	314.126	12.652	C17H18N2O4	94746	#N/A	rp
FAUX	DMCM@12.434-rp	DMCM	314.126	12.434	C17H18N2O4	94746	#N/A	rp
FAUX	314.12681@13.158-rp	#N/A	314.127	13.158	C15H23O5P	#N/A	#N/A	rp
FAUX	314.12683@13.334-rp	#N/A	314.127	13.334	C19H23PS	#N/A	#N/A	rp
FAUX	314.13384@9.849-rp	#N/A	314.134	9.849	C19H24P2	#N/A	#N/A	rp
FAUX	12,13-DiHOME@15.602-rp	12,13-DiHOME	314.246	15.602	C18H34O4	8412123	Other	rp
FAUX	315.04694@0.981-rp	#N/A	315.047	0.981	C7H14N3O9P	#N/A	#N/A	rp
FAUX	N-(4-Butoxyphenyl)-6,8,10-triazaspiro[4.5]deca-6,9-diene-7,9-diamine@9.666-rp	N-(4-Butoxyphenyl)-6,8,10-triazaspiro[4.5]deca-6,9-diene-7,9-diamine	315.205	9.666	C17H25N5O	1624888	#N/A	rp
FAUX	316.09233@8.938-rp	#N/A	316.092	8.938	C14H23O2P3	#N/A	#N/A	rp
FAUX	N-(1,5-Dimethyl-3-oxo-2-phenyl-2,3-dihydro-1H-pyrazol-4-yl)-L-leucinamide@13.707-rp	N-(1,5-Dimethyl-3-oxo-2-phenyl-2,3-dihydro-1H-pyrazol-4-yl)-L-leucinamide	316.189	13.707	C17H24N4O2	151756	#N/A	rp
FAUX	N-(1,5-Dimethyl-3-oxo-2-phenyl-2,3-dihydro-1H-pyrazol-4-yl)-L-leucinamide@13.841-rp	N-(1,5-Dimethyl-3-oxo-2-phenyl-2,3-dihydro-1H-pyrazol-4-yl)-L-leucinamide	316.189	13.841	C17H24N4O2	151756	#N/A	rp
FAUX	316.19952@7.474-rp	#N/A	316.2	7.474	C15H28N2O5	#N/A	#N/A	rp
FAUX	2636@15.063-rp	2636	316.225	15.063	C18H28N4O	28712	#N/A	rp
FAUX	316.65235@17.182-rp	#N/A	316.652	17.182	#N/A	#N/A	#N/A	rp
FAUX	317.16027@6.823-rp	#N/A	317.16	6.823	C6H23N9O4S	#N/A	#N/A	rp
FAUX	3-[(3-Hydroxynonanoyl)oxy]-4-(trimethylammonio)butanoate@10.289-rp	3-[(3-Hydroxynonanoyl)oxy]-4-(trimethylammonio)butanoate	317.22	10.289	C16H31NO5	59664326	#N/A	rp
FAUX	317.99124@1.391-rp	#N/A	317.991	1.391	C7H12O10P2	#N/A	#N/A	rp
FAUX	1804947@10.467-rp	1804947	318.132	10.467	C14H22O8	6258	#N/A	rp
FAUX	318.14146@12.83-rp	#N/A	318.141	12.83	C13H22N2O7	#N/A	#N/A	rp
FAUX	12-HEPE@17.105-rp	12-HEPE	318.219	17.105	C20H30O3	#N/A	Metabolic pathways;Biosynthesis of secondary metabolites;Other	rp
FAUX	Hernandonine@9.843-rp	Hernandonine	319.048	9.843	C18H9NO5	437794	#N/A	rp
FAUX	319.23554@12.831-rp	#N/A	319.236	12.831	C16H33NO5	#N/A	#N/A	rp
FAUX	319.94497@0.988-rp	#N/A	319.945	0.988	C2H3Cl3N10O3	#N/A	#N/A	rp
FAUX	4-(2-Carboxy-1-azetidinyl)-N-(3-carboxy-3-hydroxypropyl)threonine@12.165-rp	4-(2-Carboxy-1-azetidinyl)-N-(3-carboxy-3-hydroxypropyl)threonine	320.121	12.165	C12H20N2O8	2342314	#N/A	rp
FAUX	11(R)-HETE@17.782-rp	11(R)-HETE	320.235	17.782	C20H32O3	4446292	Metabolic pathways;Other	rp
FAUX	321.11741@2.783-rp	#N/A	321.117	2.783	C11H19N3O8	#N/A	#N/A	rp
FAUX	322.00421@0.915-rp	#N/A	322.004	0.915	C8H2N8O7	#N/A	#N/A	rp
FAUX	322.02491@0.891-rp	#N/A	322.025	0.891	C6H15N2O9PS	#N/A	#N/A	rp
FAUX	322.15457@13.296-rp	#N/A	322.155	13.296	C11H19N10P	#N/A	#N/A	rp
FAUX	324.01448@1.263-rp	#N/A	324.014	1.263	C13H13N2O2PS2	#N/A	#N/A	rp
FAUX	RibavirinMonophosphate@3.059-rp	RibavirinMonophosphate	324.049	3.059	C8H13N4O8P	90600	#N/A	rp
FAUX	N-[(2R,3R,6R)-6-[2-(cyclopropylmethylamino)-2-oxoethyl]-2-(hydroxymethyl)oxan-3-yl]cyclobutanecarboxamide@20.369-rp	N-[(2R,3R,6R)-6-[2-(cyclopropylmethylamino)-2-oxoethyl]-2-(hydroxymethyl)oxan-3-yl]cyclobutanecarboxamide	324.204	20.369	C17H28N2O4	58168564	#N/A	rp
FAUX	Zofenoprilat@3.211-rp	Zofenoprilat	325.079	3.211	C15H19NO3S2	2298589	#N/A	rp
FAUX	N-glycolylneuraminicacid@1.053-rp	N-glycolylneuraminicacid	325.101	1.053	C11H19NO10	#N/A	Other	rp
FAUX	Bisoprolol@10.173-rp	Bisoprolol	325.225	10.173	C18H31NO4	2312	Other	rp
FAUX	325.76986@0.984-rp	#N/A	325.77	0.984	C2H4Cl4P2S3	#N/A	#N/A	rp
FAUX	326.13231@1.012-rp	#N/A	326.132	1.012	C11H22N2O9	#N/A	#N/A	rp
FAUX	326.21962@21.309-rp	#N/A	326.22	21.309	C19H35PS	#N/A	#N/A	rp
FAUX	13,17-Dimethyl-17-propionyl-1,2,6,7,8,11,12,13,14,15,16,17-dodecahydro-3H-cyclopenta[a]phenanthren-3-one@17.857-rp	13,17-Dimethyl-17-propionyl-1,2,6,7,8,11,12,13,14,15,16,17-dodecahydro-3H-cyclopenta[a]phenanthren-3-one	326.224	17.857	C22H30O2	10442862	#N/A	rp
FAUX	327.11795@4.297-rp	#N/A	327.118	4.297	C10H22N3O7P	#N/A	#N/A	rp
FAUX	327.7668@0.986-rp	#N/A	327.767	0.986	C2HBrClO4P3S	#N/A	#N/A	rp
FAUX	328.12834@9.836-rp	#N/A	328.128	9.836	C13H29O3PS2	#N/A	#N/A	rp
FAUX	328.1497@11.017-rp	#N/A	328.15	11.017	C12H20N6O5	#N/A	#N/A	rp
FAUX	Docosahexaenoicacid@20.277-rp	Docosahexaenoicacid	328.24	20.277	C22H32O2	393183	Other	rp
FAUX	1-palmitoleoylglycerol@18.753-rp	1-palmitoleoylglycerol	328.261	18.753	C19H36O4	#N/A	#N/A	rp
FAUX	Docosapentaenoicacid@20.975-rp	Docosapentaenoicacid	330.256	20.975	C22H34O2	4942831	Biosynthesis of secondary metabolites;Other	rp
FAUX	Docosapentaenoicacid@20.698-rp	Docosapentaenoicacid	330.256	20.698	C22H34O2	4942831	Biosynthesis of secondary metabolites;Other	rp
FAUX	331.12418@10.991-rp	#N/A	331.124	10.991	C10H25N3O5S2	#N/A	#N/A	rp
FAUX	332.13665@12.83-rp	#N/A	332.137	12.83	C10H26ClN4O4P	#N/A	#N/A	rp
FAUX	6-[[(2S)-1-oxo-2-(4-oxo-1,2,3-benzotriazin-3-yl)propyl]amino]hexanoicacid@11.349-rp	6-[[(2S)-1-oxo-2-(4-oxo-1,2,3-benzotriazin-3-yl)propyl]amino]hexanoicacid	332.147	11.349	C16H20N4O4	1438522	#N/A	rp
FAUX	14-deoxy-11,14-didehydroandrographolide@13.93-rp	14-deoxy-11,14-didehydroandrographolide	332.199	13.93	C20H28O4	#N/A	Metabolic pathways;Biosynthesis of secondary metabolites;Other	rp
FAUX	Adrenicacid@21.413-rp	Adrenicacid	332.271	21.413	C22H36O2	#N/A	Other	rp
FAUX	333.13195@6.592-rp	#N/A	333.132	6.592	C18H24NOPS	#N/A	#N/A	rp
FAUX	SMCC@12.828-rp	SMCC	334.115	12.828	C16H18N2O6	111419	#N/A	rp
FAUX	334.14418@19.595-rp	#N/A	334.144	19.595	C13H24Cl2N6	#N/A	#N/A	rp
FAUX	334.97003@1.301-rp	#N/A	334.97	1.301	C8H7N3O8P2	#N/A	#N/A	rp
FAUX	335.02362@0.924-rp	#N/A	335.024	0.924	C3H10N7O10P	#N/A	#N/A	rp
FAUX	(2E,4E)-N-Isobutyl-2,4-octadecadienamide@20.132-rp	(2E,4E)-N-Isobutyl-2,4-octadecadienamide	335.319	20.132	C22H41NO	8149826	#N/A	rp
FAUX	336.15967@20.368-rp	#N/A	336.16	20.368	C18H25ClN2O2	#N/A	#N/A	rp
FAUX	336.22731@15.599-rp	#N/A	336.227	15.599	C17H39P3	#N/A	#N/A	rp
FAUX	336.22747@19.842-rp	#N/A	336.227	19.842	C15H32N2O6	#N/A	#N/A	rp
FAUX	Pregnanetriol@19.321-rp	Pregnanetriol	336.266	19.321	C21H36O3	92121	#N/A	rp
FAUX	337.07966@7.102-rp	#N/A	337.08	7.102	C19H17NOP2	#N/A	#N/A	rp
FAUX	(13E)-13-Docosenamide@23.976-rp	(13E)-13-Docosenamide	337.334	23.976	C22H43NO	4517397	#N/A	rp
FAUX	338.033@1.888-rp	#N/A	338.033	1.888	C4H16N6O6P2S	#N/A	#N/A	rp
FAUX	338.19846@20.365-rp	#N/A	338.198	20.365	C16H27ClN6	#N/A	#N/A	rp
FAUX	339.04091@1.894-rp	#N/A	339.041	1.894	C7H13N7O5S2	#N/A	#N/A	rp
FAUX	5-Methoxy-1H-indol-6-ylbeta-D-glucopyranosiduronicacid@7.317-rp	5-Methoxy-1H-indol-6-ylbeta-D-glucopyranosiduronicacid	339.095	7.317	C15H17NO8	170260	#N/A	rp
FAUX	6'-Methoxycinchonan-3,9-diol@20.368-rp	6'-Methoxycinchonan-3,9-diol	340.178	20.368	C20H24N2O3	90	#N/A	rp
FAUX	340.90474@1.02-rp	#N/A	340.905	1.02	C7H3Cl3N5O3P	#N/A	#N/A	rp
FAUX	341.22038@13.306-rp	#N/A	341.22	13.306	C19H35NS2	#N/A	#N/A	rp
FAUX	342.16558@11.835-rp	#N/A	342.166	11.835	C13H22N6O5	#N/A	#N/A	rp
FAUX	aloxistatin@17.772-rp	aloxistatin	342.217	17.772	C17H30N2O5	59098	#N/A	rp
FAUX	2475675@14.974-rp	2475675	342.255	14.974	C23H34O2	4908583	#N/A	rp
FAUX	2475675@13.935-rp	2475675	342.256	13.935	C23H34O2	4908583	#N/A	rp
FAUX	342.90594@1.386-rp	#N/A	342.906	1.386	C5H3N3O9P2S	#N/A	#N/A	rp
FAUX	343.23598@11.486-rp	#N/A	343.236	11.486	C19H29N5O	#N/A	#N/A	rp
FAUX	343.97679@0.887-rp	#N/A	343.977	0.887	C8H9O13P	#N/A	#N/A	rp
FAUX	343.97968@0.893-rp	#N/A	343.98	0.893	#N/A	#N/A	#N/A	rp
FAUX	344.12366@10.994-rp	#N/A	344.124	10.994	C15H26N2OP2S	#N/A	#N/A	rp
FAUX	344.14488@8.21-rp	#N/A	344.145	8.21	C12H30N2O3P2S	#N/A	#N/A	rp
FAUX	1804221@15.202-rp	1804221	344.22	15.202	C18H32O6	62498	#N/A	rp
FAUX	tp@17.857-rp	tp	344.235	17.857	C22H32O3	5774	#N/A	rp
FAUX	344.98857@1.273-rp	#N/A	344.989	1.273	C6H5N9O5P2	#N/A	#N/A	rp
FAUX	[3-(Hydroxymethyl)-3-methyl-2-oxobicyclo[2.2.1]hept-1-yl]methylhexopyranoside@11.957-rp	[3-(Hydroxymethyl)-3-methyl-2-oxobicyclo[2.2.1]hept-1-yl]methylhexopyranoside	346.163	11.957	C16H26O8	76962435	#N/A	rp
FAUX	346.19915@11.913-rp	#N/A	346.199	11.913	C21H32P2	#N/A	#N/A	rp
FAUX	CALYCANTHINE@13.367-rp	CALYCANTHINE	346.214	13.367	C22H26N4	10344696	Metabolic pathways;Other	rp
FAUX	346.23561@12.645-rp	#N/A	346.236	12.645	C19H38OS2	#N/A	#N/A	rp
FAUX	347.98225@0.926-rp	#N/A	347.982	0.926	C4H10N6O7P2S	#N/A	#N/A	rp
FAUX	349.99377@0.926-rp	#N/A	349.994	0.926	C6H7N8O6PS	#N/A	#N/A	rp
FAUX	350.0838@2.436-rp	#N/A	350.084	2.436	C9H14N6O9	#N/A	#N/A	rp
FAUX	350.21231@19.843-rp	#N/A	350.212	19.843	C13H32N6OP2	#N/A	#N/A	rp
FAUX	351.02423@1-rp	#N/A	351.024	1	C8H11ClN7O5P	#N/A	#N/A	rp
FAUX	351.17057@19.845-rp	#N/A	351.171	19.845	C18H26ClN3O2	#N/A	Metabolic pathways;Biosynthesis of secondary metabolites;Biosynthesis of alkaloids derived from shikimate pathway;Other	rp
FAUX	N-(11Z,14Z)-eicosadienoylethanolamine@20.814-rp	N-(11Z,14Z)-eicosadienoylethanolamine	351.314	20.814	C22H41NO2	4446564	#N/A	rp
FAUX	Digalacturonicacidunsaturated@1.2-rp	Digalacturonicacidunsaturated	352.064	1.2	C12H16O12	#N/A	Metabolic pathways;Other	rp
FAUX	352.13985@1.896-rp	#N/A	352.14	1.896	C15H20N4O6	#N/A	#N/A	rp
FAUX	352.18579@14.626-rp	#N/A	352.186	14.626	C14H28N2O8	#N/A	#N/A	rp
FAUX	352.20135@19.842-rp	#N/A	352.201	19.842	C15H32N2O5S	#N/A	#N/A	rp
FAUX	352.22789@20.969-rp	#N/A	352.228	20.969	C19H33N2O2P	#N/A	#N/A	rp
FAUX	quinbolone@13.546-rp	quinbolone	352.24	13.546	C24H32O2	8536132	#N/A	rp
FAUX	353.00465@1.38-rp	#N/A	353.005	1.38	C8H9Cl2N7O5	#N/A	#N/A	rp
FAUX	354.07508@0.917-rp	#N/A	354.075	0.917	C7H18N2O14	#N/A	#N/A	rp
FAUX	354.21686@20.968-rp	#N/A	354.217	20.968	C16H35O6P	#N/A	#N/A	rp
FAUX	5,5',6,6'-Tetramethyl-3,3'-di-tert-butyl-1,1'-biphenyl-2,2'-diol@13.869-rp	5,5',6,6'-Tetramethyl-3,3'-di-tert-butyl-1,1'-biphenyl-2,2'-diol	354.255	13.869	C24H34O2	2505433	#N/A	rp
FAUX	(13E)-1,11,16-Trihydroxy-16-methylprost-13-en-9-one@19.159-rp	(13E)-1,11,16-Trihydroxy-16-methylprost-13-en-9-one	354.277	19.159	C21H38O4	10612250	#N/A	rp
FAUX	5-Fluoro-1-{2-[2-(hydroxymethyl)-4-nitrophenoxy]-1-methoxyethyl}-2,4(1H,3H)-pyrimidinedione@0.917-rp	5-Fluoro-1-{2-[2-(hydroxymethyl)-4-nitrophenoxy]-1-methoxyethyl}-2,4(1H,3H)-pyrimidinedione	355.08	0.917	C14H14FN3O7	29400681	#N/A	rp
FAUX	356.18103@12.833-rp	#N/A	356.181	12.833	C15H35O3P3	#N/A	#N/A	rp
FAUX	MFCD00056293@14.997-rp	MFCD00056293	356.271	14.997	C24H36O2	4903459	#N/A	rp
FAUX	MFCD00056293@21.236-rp	MFCD00056293	356.271	21.236	C24H36O2	4903459	#N/A	rp
FAUX	1-oleoylglycerol@20.26-rp	1-oleoylglycerol	356.292	20.26	C21H40O4	#N/A	#N/A	rp
FAUX	1-oleoylglycerol@20.091-rp	1-oleoylglycerol	356.293	20.091	C21H40O4	#N/A	#N/A	rp
FAUX	356.8492@0.99-rp	#N/A	356.849	0.99	CH4Cl4N3O8P	#N/A	#N/A	rp
FAUX	356.95215@1.303-rp	#N/A	356.952	1.303	C6HN9O6P2	#N/A	#N/A	rp
FAUX	357.1844@12.833-rp	#N/A	357.184	12.833	C13H32N3O4PS	#N/A	#N/A	rp
FAUX	MFCD00691615@3.967-rp	MFCD00691615	358.09	3.967	C16H14N4O6	16116009	#N/A	rp
FAUX	358.1395@11.834-rp	#N/A	358.139	11.834	C14H31O4PS2	#N/A	#N/A	rp
FAUX	2062850@12.767-rp	2062850	358.25	12.767	C23H34O3	2005918	#N/A	rp
FAUX	2062850@12.326-rp	2062850	358.251	12.326	C23H34O3	2005918	#N/A	rp
FAUX	358.84617@0.992-rp	#N/A	358.846	0.992	CHCl2N5O7P2S	#N/A	#N/A	rp
FAUX	Nitrendipine@10.592-rp	Nitrendipine	360.132	10.592	C18H20N2O6	4351	Other	rp
FAUX	360.17843@12.959-rp	#N/A	360.178	12.959	C17H28O8	#N/A	#N/A	rp
FAUX	360.17851@12.676-rp	#N/A	360.179	12.676	C17H28O8	#N/A	#N/A	rp
FAUX	carbazeran@12.525-rp	carbazeran	360.179	12.525	C18H24N4O4	64985	#N/A	rp
FAUX	360.21492@12.486-rp	#N/A	360.215	12.486	C19H36O2S2	#N/A	#N/A	rp
FAUX	Tributylcitrate@12.797-rp	Tributylcitrate	360.215	12.797	C18H32O7	6261	#N/A	rp
FAUX	360.22754@19.599-rp	#N/A	360.228	19.599	C16H33N4O3P	#N/A	#N/A	rp
FAUX	361.05831@9.844-rp	#N/A	361.058	9.844	C10H20NO9PS	#N/A	#N/A	rp
FAUX	361.24632@10.175-rp	#N/A	361.246	10.175	C19H31N5O2	#N/A	#N/A	rp
FAUX	3-(1H-Benzimidazol-2-yl)-1-[4-(2,4-dimethylphenyl)-1-piperazinyl]-1-propanone@12.501-rp	3-(1H-Benzimidazol-2-yl)-1-[4-(2,4-dimethylphenyl)-1-piperazinyl]-1-propanone	362.209	12.501	C22H26N4O	7829081	Metabolic pathways;Other	rp
FAUX	362.24303@20.366-rp	#N/A	362.243	20.366	C18H30N6O2	#N/A	#N/A	rp
FAUX	363.9893@0.945-rp	#N/A	363.989	0.945	C6H9ClN4O12	#N/A	#N/A	rp
FAUX	364.09762@1.051-rp	#N/A	364.098	1.051	C15H12N10S	#N/A	#N/A	rp
FAUX	364.25871@21.308-rp	#N/A	364.259	21.308	C18H32N6O2	#N/A	#N/A	rp
FAUX	364.88786@1.386-rp	#N/A	364.888	1.386	C12H2NO5P3S	#N/A	#N/A	rp
FAUX	365.13329@0.977-rp	#N/A	365.133	0.977	C7H25N7O6P2	#N/A	#N/A	rp
FAUX	365.95849@0.918-rp	#N/A	365.958	0.918	C8H8N4O7P2S	#N/A	#N/A	rp
FAUX	365.96769@0.93-rp	#N/A	365.968	0.93	C9H3N8O5PS	#N/A	#N/A	rp
FAUX	366.03889@0.857-rp	#N/A	366.039	0.857	C20H14O3S2	#N/A	#N/A	rp
FAUX	366.05782@2.437-rp	#N/A	366.058	2.437	C9H14N6O8S	#N/A	Metabolic pathways;Biosynthesis of secondary metabolites;Biosynthesis of plant secondary metabolites;Other	rp
FAUX	366.13468@0.978-rp	#N/A	366.135	0.978	C17H23N2O5P	#N/A	#N/A	rp
FAUX	MFCD00065055@5.78-rp	MFCD00065055	366.153	5.78	C16H22N4O6	158475	#N/A	rp
FAUX	366.15261@6.219-rp	#N/A	366.153	6.219	C12H18N10O4	#N/A	#N/A	rp
FAUX	MFCD00029794@18.283-rp	MFCD00029794	367.308	18.283	C22H41NO3	4878649	#N/A	rp
FAUX	368.11223@1.043-rp	#N/A	368.112	1.043	C10H22N6O5P2	#N/A	#N/A	rp
FAUX	2,4-cholestadiene@25.927-rp	2,4-cholestadiene	368.344	25.927	C27H44	96735	#N/A	rp
FAUX	369.06598@1.032-rp	#N/A	369.066	1.032	C12H20NO8PS	#N/A	#N/A	rp
FAUX	Rimexolone@13.541-rp	Rimexolone	370.25	13.541	C24H34O3	4470902	#N/A	rp
FAUX	Rimexolone@13.846-rp	Rimexolone	370.251	13.846	C24H34O3	4470902	#N/A	rp
FAUX	371.05509@0.898-rp	#N/A	371.055	0.898	C11H19NO9P2	#N/A	#N/A	rp
FAUX	371.12383@12.832-rp	#N/A	371.124	12.832	C17H26ClN3S2	#N/A	#N/A	rp
FAUX	372.05969@0.913-rp	#N/A	372.06	0.913	C11H13N6O7P	#N/A	#N/A	rp
FAUX	372.1058@6.208-rp	#N/A	372.106	6.208	C13H22N6OP2S	#N/A	#N/A	rp
FAUX	372.15504@12.832-rp	#N/A	372.155	12.832	C19H25N4PS	#N/A	#N/A	rp
FAUX	17beta-(Acetylthio)estra-1,3,5(10)-trien-3-olacetate@10.005-rp	17beta-(Acetylthio)estra-1,3,5(10)-trien-3-olacetate	372.176	10.005	C22H28O3S	10128386	#N/A	rp
FAUX	4-(4-methylpiperidin-1-yl)-3-nitrobenzaldehyde(4-amino-5-ethyl-4H-1,2,4-triazol-3-yl)hydrazone@20.275-rp	4-(4-methylpiperidin-1-yl)-3-nitrobenzaldehyde(4-amino-5-ethyl-4H-1,2,4-triazol-3-yl)hydrazone	372.204	20.275	C17H24N8O2	20164619	#N/A	rp
FAUX	nabilone@13.473-rp	nabilone	372.266	13.473	C24H36O3	36449	#N/A	rp
FAUX	nabilone@13.87-rp	nabilone	372.266	13.87	C24H36O3	36449	#N/A	rp
FAUX	373.06279@0.91-rp	#N/A	373.063	0.91	C19H11N5O2S	#N/A	#N/A	rp
FAUX	374.01777@0.908-rp	#N/A	374.018	0.908	C5H13N8O6P3	#N/A	#N/A	rp
FAUX	3,3,6,6,9,9-Hexamethyl-3,4,8,9-tetrahydro-1H-1,4,8,11-benzotetraazacyclotridecine-2,5,7,10(6H,11H)-tetrone@13.783-rp	3,3,6,6,9,9-Hexamethyl-3,4,8,9-tetrahydro-1H-1,4,8,11-benzotetraazacyclotridecine-2,5,7,10(6H,11H)-tetrone	374.194	13.783	C19H26N4O4	4472401	#N/A	rp
FAUX	cinatrinC3@13.454-rp	cinatrinC3	374.194	13.454	C18H30O8	9581087	#N/A	rp
FAUX	3,3,6,6,9,9-Hexamethyl-3,4,8,9-tetrahydro-1H-1,4,8,11-benzotetraazacyclotridecine-2,5,7,10(6H,11H)-tetrone@13.212-rp	3,3,6,6,9,9-Hexamethyl-3,4,8,9-tetrahydro-1H-1,4,8,11-benzotetraazacyclotridecine-2,5,7,10(6H,11H)-tetrone	374.194	13.212	C19H26N4O4	4472401	#N/A	rp
FAUX	374.2126@19.603-rp	#N/A	374.213	19.603	C15H32N6OP2	#N/A	#N/A	rp
FAUX	376.03319@1.313-rp	#N/A	376.033	1.313	C14H5N10O2P	#N/A	#N/A	rp
FAUX	N-[(2R,3R,6S)-6-[2-(ethylsulfonylamino)ethyl]-2-(hydroxymethyl)oxan-3-yl]cyclohexanecarboxamide@19.598-rp	N-[(2R,3R,6S)-6-[2-(ethylsulfonylamino)ethyl]-2-(hydroxymethyl)oxan-3-yl]cyclohexanecarboxamide	376.201	19.598	C17H32N2O5S	58164655	#N/A	rp
FAUX	376.22784@20.365-rp	#N/A	376.228	20.365	C15H34N6OP2	#N/A	#N/A	rp
FAUX	376.26105@12.766-rp	#N/A	376.261	12.766	C24H32N4	#N/A	#N/A	rp
FAUX	376.29114@14.304-rp	#N/A	376.291	14.304	C21H45OPS	#N/A	#N/A	rp
FAUX	377.04364@3.059-rp	#N/A	377.044	3.059	C4H12N9O10P	#N/A	#N/A	rp
FAUX	377.20458@12.957-rp	#N/A	377.205	12.957	C17H31NO8	#N/A	#N/A	rp
FAUX	377.233@14.138-rp	#N/A	377.233	14.138	C17H35N3O4S	#N/A	#N/A	rp
FAUX	377.90361@0.987-rp	#N/A	377.904	0.987	C3H6Cl4N6O7	#N/A	#N/A	rp
FAUX	378.05165@3.061-rp	#N/A	378.052	3.061	C9H21N2O8P3	#N/A	#N/A	rp
FAUX	378.09277@1.064-rp	#N/A	378.093	1.064	C13H19ClN4O7	#N/A	#N/A	rp
FAUX	378.21691@20.366-rp	#N/A	378.217	20.366	C21H34N2S2	#N/A	#N/A	rp
FAUX	378.24356@21.308-rp	#N/A	378.244	21.308	C15H36N6OP2	#N/A	#N/A	rp
FAUX	378.27707@15.277-rp	#N/A	378.277	15.277	C17H39N4O3P	#N/A	Other	rp
FAUX	eicosa-5,8,11,14-tetraenoicacid1,3-dihydroxypropan-2-ylester@13.936-rp	eicosa-5,8,11,14-tetraenoicacid1,3-dihydroxypropan-2-ylester	378.277	13.936	C23H38O4	10609693	Other	rp
FAUX	378.27721@14.978-rp	#N/A	378.277	14.978	C16H38N6O2S	#N/A	Other	rp
FAUX	379.20198@21.309-rp	#N/A	379.202	21.309	C20H30ClN3O2	#N/A	#N/A	rp
FAUX	Sphingosine-1-phosphate@14.969-rp	Sphingosine-1-phosphate	379.249	14.969	C18H38NO5P	#N/A	Metabolic pathways;Other	rp
FAUX	379.90083@0.989-rp	#N/A	379.901	0.989	C4H4Cl2N6O7P2	#N/A	#N/A	rp
FAUX	380.23254@21.306-rp	#N/A	380.233	21.306	C13H32N8O3S	#N/A	#N/A	rp
FAUX	381.94153@0.936-rp	#N/A	381.942	0.936	C11H9ClO9P2	#N/A	#N/A	rp
FAUX	N-(2-furanylmethyl)-2-[[5-[(2-methyl-1H-indol-3-yl)methyl]-1,3,4-oxadiazol-2-yl]thio]acetamide@0.985-rp	N-(2-furanylmethyl)-2-[[5-[(2-methyl-1H-indol-3-yl)methyl]-1,3,4-oxadiazol-2-yl]thio]acetamide	382.108	0.985	C19H18N4O3S	2822240	#N/A	rp
FAUX	beta-D-glucosaminyl-(1->4)-N-acetyl-beta-D-glucosamine@12.965-rp	beta-D-glucosaminyl-(1->4)-N-acetyl-beta-D-glucosamine	382.16	12.965	C14H26N2O10	8332227	#N/A	rp
FAUX	383.11177@0.971-rp	#N/A	383.112	0.971	C20H13N7O2	#N/A	#N/A	rp
FAUX	384.15957@20.272-rp	#N/A	384.16	20.272	C16H34ClN2PS2	#N/A	#N/A	rp
FAUX	384.22757@19.597-rp	#N/A	384.228	19.597	C21H39P3	#N/A	#N/A	rp
FAUX	386.19355@12.827-rp	#N/A	386.194	12.827	C22H31N2PS	#N/A	#N/A	rp
FAUX	386.2431@20.309-rp	#N/A	386.243	20.309	C21H41P3	#N/A	#N/A	rp
FAUX	387.04073@1.157-rp	#N/A	387.041	1.157	C10H17N3O9S2	#N/A	#N/A	rp
FAUX	387.04075@1.375-rp	#N/A	387.041	1.375	C10H17N3O9S2	#N/A	#N/A	rp
FAUX	388.03349@0.91-rp	#N/A	388.033	0.91	C14H9N6O6P	#N/A	#N/A	rp
FAUX	Trichachnine@17.607-rp	Trichachnine	388.189	17.607	C23H24N4O2	86870	#N/A	rp
FAUX	ilomastat@14.234-rp	ilomastat	388.21	14.234	C20H28N4O4	117009	#N/A	rp
FAUX	388.26094@13.843-rp	#N/A	388.261	13.843	C25H32N4	#N/A	#N/A	rp
FAUX	11-[(2,3-Dihydroxypropoxy)carbonyl]heptadecanoicacid@18.76-rp	11-[(2,3-Dihydroxypropoxy)carbonyl]heptadecanoicacid	388.283	18.76	C21H40O6	13343574	#N/A	rp
FAUX	Bis(2-ethylhexyl)phthalate@13.869-rp	Bis(2-ethylhexyl)phthalate	390.276	13.869	C24H38O4	21106505	#N/A	rp
FAUX	Bis(2-ethylhexyl)phthalate@15.587-rp	Bis(2-ethylhexyl)phthalate	390.277	15.587	C24H38O4	21106505	#N/A	rp
FAUX	390.27718@16.428-rp	#N/A	390.277	16.428	C25H34N4	#N/A	#N/A	rp
FAUX	391.03798@0.906-rp	#N/A	391.038	0.906	C7H14N5O12P	#N/A	#N/A	rp
FAUX	391.0411@0.91-rp	#N/A	391.041	0.91	C6H15N7O9P2	#N/A	#N/A	rp
FAUX	391.14094@2.208-rp	#N/A	391.141	2.208	C15H27N3O5P2	#N/A	#N/A	rp
FAUX	392.11475@0.894-rp	#N/A	392.115	0.894	C8H20N6O12	#N/A	Metabolic pathways;Biosynthesis of secondary metabolites;Biosynthesis of alkaloids derived from shikimate pathway;Other	rp
FAUX	392.29278@14.996-rp	#N/A	392.293	14.996	C25H36N4	#N/A	Metabolic pathways;Other	rp
FAUX	394.14219@19.842-rp	#N/A	394.142	19.842	C17H18N10S	#N/A	Biosynthesis of secondary metabolites;Biosynthesis of phenylpropanoids;Other	rp
FAUX	394.21285@20.97-rp	#N/A	394.213	20.97	C20H39ClOS2	#N/A	#N/A	rp
FAUX	Cetylgallate@12.767-rp	Cetylgallate	394.272	12.767	C23H38O5	71073	Metabolic pathways;Biosynthesis of secondary metabolites;Other	rp
FAUX	Cetylgallate@12.282-rp	Cetylgallate	394.272	12.282	C23H38O5	71073	Metabolic pathways;Biosynthesis of secondary metabolites;Other	rp
FAUX	398.19173@9.844-rp	#N/A	398.192	9.844	C16H26N6O6	#N/A	#N/A	rp
FAUX	399.04856@0.926-rp	#N/A	399.049	0.926	C6H20N5O9P3	#N/A	#N/A	rp
FAUX	CarnitineC16:0@17.275-rp	CarnitineC16:0	399.334	17.275	C23H45NO4	#N/A	Other	rp
FAUX	402.01269@0.912-rp	#N/A	402.013	0.912	C11H16O12P2	#N/A	#N/A	rp
FAUX	Tributylcitrateacetate@14.689-rp	Tributylcitrateacetate	402.225	14.689	C20H34O8	6259	#N/A	rp
FAUX	402.23819@17.783-rp	#N/A	402.238	17.783	C28H34S	#N/A	#N/A	rp
FAUX	404.00733@0.914-rp	#N/A	404.007	0.914	C9H9N8O7PS	#N/A	#N/A	rp
FAUX	404.02704@0.893-rp	#N/A	404.027	0.893	C11H18O12P2	#N/A	#N/A	rp
FAUX	404.17073@19.405-rp	#N/A	404.171	19.405	C19H33ClN2OS2	#N/A	#N/A	rp
FAUX	LaurosideB@12.829-rp	LaurosideB	404.205	12.829	C19H32O9	9415536	#N/A	rp
FAUX	Diginatigenin@13.366-rp	Diginatigenin	406.236	13.366	C23H34O6	13078156	#N/A	rp
FAUX	406.27132@12.889-rp	#N/A	406.271	12.889	C25H34N4O	#N/A	#N/A	rp
FAUX	12-dehydrocholicacid@14.447-rp	12-dehydrocholicacid	406.272	14.447	C24H38O5	#N/A	#N/A	rp
FAUX	406.27204@14.157-rp	#N/A	406.272	14.157	C17H38N6O3S	#N/A	#N/A	rp
FAUX	12-dehydrocholicacid@13.84-rp	12-dehydrocholicacid	406.272	13.84	C24H38O5	#N/A	#N/A	rp
FAUX	407.27556@13.837-rp	#N/A	407.276	13.837	#N/A	#N/A	#N/A	rp
FAUX	407.95253@0.952-rp	#N/A	407.953	0.952	C8H11ClN2O11P2	#N/A	#N/A	rp
FAUX	Alpha-muricholicacid@13.872-rp	Alpha-muricholicacid	408.288	13.872	C24H40O5	#N/A	Metabolic pathways;Other	rp
FAUX	Alpha-muricholicacid@12.65-rp	Alpha-muricholicacid	408.288	12.65	C24H40O5	#N/A	Metabolic pathways;Other	rp
FAUX	409.31908@16.223-rp	#N/A	409.319	16.223	C18H44N5O3P	#N/A	#N/A	rp
FAUX	410.00252@0.88-rp	#N/A	410.003	0.88	C12H10N8O3S3	#N/A	#N/A	rp
FAUX	410.15282@10.994-rp	#N/A	410.153	10.994	C16H30N2O6S2	#N/A	#N/A	rp
FAUX	410.19173@14.234-rp	#N/A	410.192	14.234	C16H30N2O10	#N/A	#N/A	rp
FAUX	7-hexyl-3-methyl-8-(4-phenyl-1-piperazinyl)purine-2,6-dione@20.272-rp	7-hexyl-3-methyl-8-(4-phenyl-1-piperazinyl)purine-2,6-dione	410.243	20.272	C22H30N6O2	576736	#N/A	rp
FAUX	412.25857@0.926-rp	#N/A	412.259	0.926	C19H41O7P	#N/A	#N/A	rp
FAUX	412.25894@20.69-rp	#N/A	412.259	20.69	C19H41O7P	#N/A	#N/A	rp
FAUX	412.31276@14.303-rp	#N/A	412.313	14.303	C31H40	#N/A	#N/A	rp
FAUX	413.03759@1.017-rp	#N/A	413.038	1.017	C14H16N5O4PS2	#N/A	#N/A	rp
FAUX	414.15429@9.841-rp	#N/A	414.154	9.841	C15H27N8PS2	#N/A	#N/A	rp
FAUX	414.16708@9.841-rp	#N/A	414.167	9.841	C13H33N6OP3S	#N/A	#N/A	rp
FAUX	2,3-Diacetoxypropylpalmitate@19.323-rp	2,3-Diacetoxypropylpalmitate	414.298	19.323	C23H42O6	166670	#N/A	rp
FAUX	415.02223@0.925-rp	#N/A	415.022	0.925	C5H14N5O15P	#N/A	#N/A	rp
FAUX	416.02301@0.926-rp	#N/A	416.023	0.926	C11H18N2O9P2S	#N/A	#N/A	rp
FAUX	Tonapofylline@15.248-rp	Tonapofylline	416.241	15.248	C22H32N4O4	187607	#N/A	rp
FAUX	416.2411@15.719-rp	#N/A	416.241	15.719	C18H28N10O2	#N/A	#N/A	rp
FAUX	416.31363@20.26-rp	#N/A	416.314	20.26	C24H40N4O2	#N/A	#N/A	rp
FAUX	416.31398@20.084-rp	#N/A	416.314	20.084	C24H40N4O2	#N/A	#N/A	rp
FAUX	417.02636@0.924-rp	#N/A	417.026	0.924	C10H11N9O6S2	#N/A	#N/A	rp
FAUX	418.16278@20.376-rp	#N/A	418.163	20.376	C17H36Cl2N2OS2	#N/A	#N/A	rp
FAUX	418.21152@10.741-rp	#N/A	418.212	10.741	C24H37P3	#N/A	#N/A	rp
FAUX	418.21153@9.95-rp	#N/A	418.212	9.95	C23H26N6O2	#N/A	#N/A	rp
FAUX	418.2204@13.131-rp	#N/A	418.22	13.131	C17H36N6P2S	#N/A	#N/A	rp
FAUX	418.23056@19.841-rp	#N/A	418.231	19.841	C22H35N4PS	#N/A	#N/A	rp
FAUX	419.10016@10.991-rp	#N/A	419.1	10.991	C16H22NO10P	#N/A	#N/A	rp
FAUX	4-(6-methoxy-2-naphthalenyl)-N,N-diphenyl-1-triazolecarboxamide@20.367-rp	4-(6-methoxy-2-naphthalenyl)-N,N-diphenyl-1-triazolecarboxamide	420.158	20.367	C26H20N4O2	34448867	#N/A	rp
FAUX	420.17303@9.843-rp	#N/A	420.173	9.843	C11H29N6O9P	#N/A	#N/A	rp
FAUX	422.1734@21.309-rp	#N/A	422.173	21.309	C18H36N2OP2S2	#N/A	#N/A	rp
FAUX	423.29813@13.546-rp	#N/A	423.298	13.546	C19H38N9P	#N/A	#N/A	rp
FAUX	424.20735@14.689-rp	#N/A	424.207	14.689	C18H28N6O6	#N/A	#N/A	rp
FAUX	N-sec-Butyl-N'-[2-(3,5-dimethyl-1-piperidinyl)-4-methyl-6-quinolinyl]succinamide@12.888-rp	N-sec-Butyl-N'-[2-(3,5-dimethyl-1-piperidinyl)-4-methyl-6-quinolinyl]succinamide	424.283	12.888	C25H36N4O2	13126932	Other	rp
FAUX	3a,7a,12a,23-tetrahydroxycholanicacid@11.598-rp	3a,7a,12a,23-tetrahydroxycholanicacid	424.283	11.598	C24H40O6	#N/A	Other	rp
FAUX	425.31332@13.872-rp	#N/A	425.313	13.872	C25H47NS2	#N/A	#N/A	rp
FAUX	CarnitineC18:1@17.697-rp	CarnitineC18:1	425.35	17.697	C25H47NO4	#N/A	#N/A	rp
FAUX	425.97982@0.889-rp	#N/A	425.98	0.889	C9H6N4O16	#N/A	#N/A	rp
FAUX	426.01246@1.441-rp	#N/A	426.012	1.441	C14H12N4O8P2	#N/A	#N/A	rp
FAUX	426.08774@1.044-rp	#N/A	426.088	1.044	C12H26O12S2	#N/A	Metabolic pathways;Other	rp
FAUX	426.21699@20.272-rp	#N/A	426.217	20.272	C21H34N2O5S	#N/A	#N/A	rp
FAUX	427.04307@0.888-rp	#N/A	427.043	0.888	C7H20N5O10P3	#N/A	#N/A	rp
FAUX	(-)-Cholesterylacetate@25.178-rp	(-)-Cholesterylacetate	428.365	25.178	C29H48O2	2006078	#N/A	rp
FAUX	3-[2-[4-(2-chloro-4-nitrophenyl)-1-piperazinyl]ethoxy]-4-phenyl-1,2,5-oxadiazole@9.844-rp	3-[2-[4-(2-chloro-4-nitrophenyl)-1-piperazinyl]ethoxy]-4-phenyl-1,2,5-oxadiazole	429.12	9.844	C20H20ClN5O4	2131402	#N/A	rp
FAUX	429.33875@14.302-rp	#N/A	429.339	14.302	C31H43N	#N/A	#N/A	rp
FAUX	430.12831@9.842-rp	#N/A	430.128	9.842	C17H19N8O4P	#N/A	Other	rp
FAUX	2-(1,3-dimethyl-2,6-dioxo-7-purinyl)-N'-[2-(2-ethoxyphenoxy)-1-oxoethyl]acetohydrazide@3.058-rp	2-(1,3-dimethyl-2,6-dioxo-7-purinyl)-N'-[2-(2-ethoxyphenoxy)-1-oxoethyl]acetohydrazide	430.162	3.058	C19H22N6O6	3824499	#N/A	rp
FAUX	430.18622@19.841-rp	#N/A	430.186	19.841	C21H35ClN2OS2	#N/A	#N/A	rp
FAUX	430.25636@15.858-rp	#N/A	430.256	15.858	C22H38O8	#N/A	#N/A	rp
FAUX	430.26892@13.869-rp	#N/A	430.269	13.869	C25H40N2P2	#N/A	#N/A	rp
FAUX	7a-hydroxy-3-oxo-4-cholestenoicacid@17.852-rp	7a-hydroxy-3-oxo-4-cholestenoicacid	430.308	17.852	C27H42O4	#N/A	Biosynthesis of plant secondary metabolites;Other	rp
FAUX	431.99675@0.925-rp	#N/A	431.997	0.925	C11H10N6O9P2	#N/A	#N/A	rp
FAUX	432.12861@9.833-rp	#N/A	432.129	9.833	C13H32N6S5	#N/A	#N/A	rp
FAUX	432.16716@12.834-rp	#N/A	432.167	12.834	C16H34O9P2	#N/A	#N/A	rp
FAUX	436.07806@0.916-rp	#N/A	436.078	0.916	C15H22N2O9P2	#N/A	#N/A	rp
FAUX	436.96495@1.395-rp	#N/A	436.965	1.395	C13H4N5O11P	#N/A	#N/A	rp
FAUX	437.28984@16.753-rp	#N/A	437.29	16.753	C16H39N9O3S	#N/A	#N/A	rp
FAUX	438.08909@0.914-rp	#N/A	438.089	0.914	C6H20N10O9P2	#N/A	#N/A	rp
FAUX	438.18415@12.832-rp	#N/A	438.184	12.832	C21H30N2O6S	#N/A	#N/A	rp
FAUX	438.22296@15.247-rp	#N/A	438.223	15.247	C19H40N2O3P2S	#N/A	#N/A	rp
FAUX	441.9525@0.891-rp	#N/A	441.952	0.891	C6H3N8O14P	#N/A	#N/A	rp
FAUX	442.15541@9.842-rp	#N/A	442.155	9.842	C17H27N6O4PS	#N/A	#N/A	rp
FAUX	442.23057@19.599-rp	#N/A	442.231	19.599	C23H41O2P3	#N/A	#N/A	rp
FAUX	444.24597@20.368-rp	#N/A	444.246	20.368	C21H36N2O8	#N/A	#N/A	rp
FAUX	444.27188@16.482-rp	#N/A	444.272	16.482	C23H40O8	#N/A	#N/A	rp
FAUX	445.99239@0.944-rp	#N/A	445.992	0.944	C10H9ClN10O5P2	#N/A	#N/A	rp
FAUX	446.13542@3.062-rp	#N/A	446.135	3.062	C21H19N8O2P	#N/A	#N/A	rp
FAUX	446.26162@21.307-rp	#N/A	446.262	21.307	C19H41N6P3	#N/A	#N/A	rp
FAUX	447.9706@0.928-rp	#N/A	447.971	0.928	C10H10N8O5P2S2	#N/A	#N/A	rp
FAUX	448.0419@0.861-rp	#N/A	448.042	0.861	C16H20N2O7S3	#N/A	#N/A	rp
FAUX	448.0695@1.036-rp	#N/A	448.07	1.036	C17H17N6O5PS	#N/A	#N/A	rp
FAUX	450.02205@1.021-rp	#N/A	450.022	1.021	C10H13ClN10O5P2	#N/A	#N/A	rp
FAUX	(2R)-3-{[(2-Aminoethoxy)(hydroxy)phosphoryl]oxy}-2-hydroxypropyl(9Z)-9-hexadecenoate@15.398-rp	(2R)-3-{[(2-Aminoethoxy)(hydroxy)phosphoryl]oxy}-2-hydroxypropyl(9Z)-9-hexadecenoate	451.27	15.398	C21H42NO7P	4446872	#N/A	rp
FAUX	451.29329@13.338-rp	#N/A	451.293	13.338	C21H47N3OP2S	#N/A	#N/A	rp
FAUX	Chasmanine@13.874-rp	Chasmanine	451.294	13.874	C25H41NO6	10179306	#N/A	rp
FAUX	452.23857@15.859-rp	#N/A	452.239	15.859	C20H42N2O3P2S	#N/A	#N/A	rp
FAUX	453.05847@0.898-rp	#N/A	453.058	0.898	C6H16N9O13P	#N/A	#N/A	rp
FAUX	SQ-26992@0.912-rp	SQ-26992	453.062	0.912	C13H19N5O9S2	4589526	#N/A	rp
FAUX	1-palmitoylglycerophosphoethanolamine@16.264-rp	1-palmitoylglycerophosphoethanolamine	453.285	16.264	C21H44NO7P	#N/A	#N/A	rp
FAUX	454.0627@0.912-rp	#N/A	454.063	0.912	C15H15N6O9P	#N/A	#N/A	rp
FAUX	454.15815@12.832-rp	#N/A	454.158	12.832	C22H31O6PS	#N/A	#N/A	rp
FAUX	454.18645@19.607-rp	#N/A	454.186	19.607	C26H31ClN2OS	#N/A	#N/A	rp
FAUX	456.02059@0.906-rp	#N/A	456.021	0.906	#N/A	#N/A	#N/A	rp
FAUX	456.20169@20.367-rp	#N/A	456.202	20.367	C17H38ClN6PS2	#N/A	#N/A	rp
FAUX	458.129@9.841-rp	#N/A	458.129	9.841	C19H29N2O5P3	#N/A	#N/A	rp
FAUX	458.21742@21.307-rp	#N/A	458.217	21.307	C17H40ClN6PS2	#N/A	#N/A	rp
FAUX	458.28773@17.105-rp	#N/A	458.288	17.105	C28H44OP2	#N/A	#N/A	rp
FAUX	Spirostan-3-ylacetate@18.097-rp	Spirostan-3-ylacetate	458.339	18.097	C29H46O4	276847	#N/A	rp
FAUX	N-[(2S,3S)-5-[(2R)-1-Hydroxy-2-propanyl]-2-{[(isopropylcarbamoyl)(methyl)amino]methyl}-3-methyl-6-oxo-3,4,5,6-tetrahydro-2H-1,5-benzoxazocin-8-yl]cyclopropanecarboxamide@14.133-rp	N-[(2S,3S)-5-[(2R)-1-Hydroxy-2-propanyl]-2-{[(isopropylcarbamoyl)(methyl)amino]methyl}-3-methyl-6-oxo-3,4,5,6-tetrahydro-2H-1,5-benzoxazocin-8-yl]cyclopropanecarboxamide	460.267	14.133	C24H36N4O5	11525847	#N/A	rp
FAUX	463.27504@12.887-rp	#N/A	463.275	12.887	C26H43NO2P2	#N/A	#N/A	rp
FAUX	463.94459@0.932-rp	#N/A	463.945	0.932	C10H11ClN2O13P2	#N/A	#N/A	rp
FAUX	464.19902@9.835-rp	#N/A	464.199	9.835	C23H34N2O4P2	#N/A	#N/A	rp
FAUX	465.30922@13.064-rp	#N/A	465.309	13.064	C27H39N5O2	#N/A	Metabolic pathways;Other	rp
FAUX	466.24636@13.871-rp	#N/A	466.246	13.871	C20H34N8O3S	#N/A	#N/A	rp
FAUX	466.25381@16.482-rp	#N/A	466.254	16.482	C25H34N6OS	#N/A	#N/A	rp
FAUX	466.29275@14.443-rp	#N/A	466.293	14.443	C23H34N10O	#N/A	#N/A	rp
FAUX	467.30052@15.564-rp	#N/A	467.301	15.564	C17H43N9O2P2	#N/A	#N/A	rp
FAUX	468.15745@20.279-rp	#N/A	468.157	20.279	C26H16N10	#N/A	#N/A	rp
FAUX	470.03628@0.909-rp	#N/A	470.036	0.909	C11H16N6O11P2	#N/A	#N/A	rp
FAUX	472.30342@17.709-rp	#N/A	472.303	17.709	C25H44O8	#N/A	#N/A	rp
FAUX	474.11751@0.896-rp	#N/A	474.118	0.896	C15H28N2O11P2	#N/A	#N/A	rp
FAUX	474.29556@14.995-rp	#N/A	474.296	14.995	C22H43N4O5P	#N/A	#N/A	rp
FAUX	475.26919@15.315-rp	#N/A	475.269	15.315	C18H39N9O2P2	#N/A	#N/A	rp
FAUX	476.27496@12.768-rp	#N/A	476.275	12.768	C24H32N10O	#N/A	#N/A	rp
FAUX	1-linoleoylglycerophosphoethanolamine@15.922-rp	1-linoleoylglycerophosphoethanolamine	477.285	15.922	C23H44NO7P	#N/A	#N/A	rp
FAUX	479.27015@11.628-rp	#N/A	479.27	11.628	C26H41NO5S	#N/A	#N/A	rp
FAUX	479.27017@11.907-rp	#N/A	479.27	11.907	C27H37N5OS	#N/A	#N/A	rp
FAUX	479.27021@12.725-rp	#N/A	479.27	12.725	C20H42N5O4PS	#N/A	#N/A	rp
FAUX	479.30077@16.676-rp	#N/A	479.301	16.676	C22H45N3O6S	#N/A	#N/A	rp
FAUX	481.3161@16.373-rp	#N/A	481.316	16.373	C19H44N7O5P	#N/A	Other	rp
FAUX	PCae(15:0)@17.599-rp	PCae(15:0)	481.316	17.599	C23H48NO7P	#N/A	Other	rp
FAUX	PCae(15:0)@17.181-rp	PCae(15:0)	481.317	17.181	C23H48NO7P	#N/A	Other	rp
FAUX	481.35212@18.072-rp	#N/A	481.352	18.072	C20H48N7O4P	#N/A	#N/A	rp
FAUX	482.05217@0.926-rp	#N/A	482.052	0.926	C13H25O13P3	#N/A	#N/A	rp
FAUX	482.31994@17.596-rp	#N/A	482.32	17.596	C17H43N10O4P	#N/A	#N/A	rp
FAUX	482.31995@17.171-rp	#N/A	482.32	17.171	C17H43N10O4P	#N/A	#N/A	rp
FAUX	486.03037@0.894-rp	#N/A	486.03	0.894	C22H13N6O2P3	#N/A	#N/A	rp
FAUX	488.27485@14.453-rp	#N/A	488.275	14.453	C24H46N2O2P2S	#N/A	#N/A	rp
FAUX	488.27495@13.546-rp	#N/A	488.275	13.546	C32H42P2	#N/A	#N/A	rp
FAUX	488.28016@14.995-rp	#N/A	488.28	14.995	C22H36N10OS	#N/A	#N/A	rp
FAUX	489.95534@0.95-rp	#N/A	489.955	0.95	C8H9ClN8O11P2	#N/A	#N/A	rp
FAUX	490.25984@12.774-rp	#N/A	490.26	12.774	C29H30N8	#N/A	#N/A	rp
FAUX	490.29045@13.872-rp	#N/A	490.29	13.872	C25H49O3P3	#N/A	#N/A	rp
FAUX	492.00545@0.884-rp	#N/A	492.005	0.884	C24H13O8PS	#N/A	#N/A	rp
FAUX	493.26512@13.874-rp	#N/A	493.265	13.874	C23H44NO6PS	#N/A	#N/A	rp
FAUX	493.31622@16.102-rp	#N/A	493.316	16.102	C20H44N7O5P	#N/A	#N/A	rp
FAUX	PCae(16:0)@17.182-rp	PCae(16:0)	495.332	17.182	C24H50NO7P	#N/A	#N/A	rp
FAUX	496.19877@10.086-rp	#N/A	496.199	10.086	C25H38O4P2S	#N/A	#N/A	rp
FAUX	497.025@0.925-rp	#N/A	497.025	0.925	#N/A	#N/A	#N/A	rp
FAUX	497.28068@11.912-rp	#N/A	497.281	11.912	C21H40N9OPS	#N/A	#N/A	rp
FAUX	497.28078@12.716-rp	#N/A	497.281	12.716	C26H45NO4P2	#N/A	#N/A	rp
FAUX	498.02597@0.925-rp	#N/A	498.026	0.925	C9H11N10O13P	#N/A	#N/A	rp
FAUX	N-Palmitoyl-O-phosphono-L-tyrosine@15.463-rp	N-Palmitoyl-O-phosphono-L-tyrosine	499.27	15.463	C25H42NO7P	9930388	#N/A	rp
FAUX	499.29657@12.878-rp	#N/A	499.297	12.878	C27H41N5O2S	#N/A	Other	rp
FAUX	499.29664@12.569-rp	#N/A	499.297	12.569	C27H41N5O2S	#N/A	Other	rp
FAUX	499.29667@14.028-rp	#N/A	499.297	14.028	C21H42N9OPS	#N/A	Other	rp
FAUX	500.19147@16.488-rp	#N/A	500.191	16.488	C20H33ClN8OS2	#N/A	#N/A	rp
FAUX	501.28512@16.049-rp	#N/A	501.285	16.049	C26H40N5O3P	#N/A	Biosynthesis of secondary metabolites;Other	rp
FAUX	503.30065@16.476-rp	#N/A	503.301	16.476	C21H42N7O5P	#N/A	#N/A	rp
FAUX	504.15285@9.841-rp	#N/A	504.153	9.841	C20H29N2O11P	#N/A	#N/A	rp
FAUX	504.27529@13.873-rp	#N/A	504.275	13.873	C25H46O6P2	#N/A	#N/A	rp
FAUX	2-[(11Z,14Z)-icosadienoyl]-sn-glycero-3-phosphoethanolamine@16.71-rp	2-[(11Z,14Z)-icosadienoyl]-sn-glycero-3-phosphoethanolamine	505.317	16.71	C25H48NO7P	24769364	#N/A	rp
FAUX	506.26402@14.317-rp	#N/A	506.264	14.317	C27H42N2O3S2	#N/A	#N/A	rp
FAUX	506.26418@13.871-rp	#N/A	506.264	13.871	C23H42N2O8S	#N/A	#N/A	rp
FAUX	507.9826@0.89-rp	#N/A	507.983	0.89	C13H18O15P2S	#N/A	#N/A	rp
FAUX	509.34754@18.046-rp	#N/A	509.348	18.046	C26H48N5O3P	#N/A	#N/A	rp
FAUX	509.34869@18.954-rp	#N/A	509.349	18.954	C20H49N9O2P2	#N/A	#N/A	rp
FAUX	511.32669@15.536-rp	#N/A	511.327	15.536	C19H47N9O3P2	#N/A	#N/A	rp
FAUX	511.40813@18.591-rp	#N/A	511.408	18.591	C27H53N5O4	#N/A	#N/A	rp
FAUX	513.27598@12.274-rp	#N/A	513.276	12.274	C21H40N9O2PS	#N/A	#N/A	rp
FAUX	513.27611@11.942-rp	#N/A	513.276	11.942	C21H42N9P3	#N/A	#N/A	rp
FAUX	513.99965@0.924-rp	#N/A	514	0.924	C10H12N8O13P2	#N/A	#N/A	rp
FAUX	514.27523@10.992-rp	#N/A	514.275	10.992	C22H38N6O8	#N/A	#N/A	rp
FAUX	515.29166@12.718-rp	#N/A	515.292	12.718	C22H43N7O3P2	#N/A	Metabolic pathways;Other	rp
FAUX	515.29169@11.618-rp	#N/A	515.292	11.618	C21H44N9P3	#N/A	Metabolic pathways;Other	rp
FAUX	515.29169@11.907-rp	#N/A	515.292	11.907	C22H43N7O3P2	#N/A	Metabolic pathways;Other	rp
FAUX	515.29839@16.09-rp	#N/A	515.298	16.09	C23H51NO5P2S	#N/A	#N/A	rp
FAUX	517.31312@17.198-rp	#N/A	517.313	17.198	C22H44N7O5P	#N/A	#N/A	rp
FAUX	517.31624@16.008-rp	#N/A	517.316	16.008	C30H50NP3	#N/A	#N/A	rp
FAUX	518.08102@0.916-rp	#N/A	518.081	0.916	C13H28O17P2	#N/A	#N/A	rp
FAUX	518.3196@16.008-rp	#N/A	518.32	16.008	C19H47N6O8P	#N/A	#N/A	rp
FAUX	PCae(18:2)@16.712-rp	PCae(18:2)	519.332	16.712	C26H50NO7P	#N/A	#N/A	rp
FAUX	520.09222@0.913-rp	#N/A	520.092	0.913	C9H26N6O15P2	#N/A	#N/A	rp
FAUX	PCae(18:1)@17.657-rp	PCae(18:1)	521.347	17.657	C26H52NO7P	#N/A	#N/A	rp
FAUX	523.35314@17.654-rp	#N/A	523.353	17.654	C22H51N7O3P2	#N/A	#N/A	rp
FAUX	PCae(18:0)@18.96-rp	PCae(18:0)	523.363	18.96	C26H54NO7P	#N/A	#N/A	rp
FAUX	523.95531@0.891-rp	#N/A	523.955	0.891	C9H19O17P3S	#N/A	Other	rp
FAUX	524.21154@17.476-rp	#N/A	524.212	17.476	C23H42O7P2S	#N/A	#N/A	rp
FAUX	524.36653@19.017-rp	#N/A	524.367	19.017	C20H49N10O4P	#N/A	#N/A	rp
FAUX	lysophosphatidylethanolamine(22:6(4Z,7Z,10Z,13Z,16Z,19Z)/0:0)@16.142-rp	lysophosphatidylethanolamine(22:6(4Z,7Z,10Z,13Z,16Z,19Z)/0:0)	525.285	16.142	C27H44NO7P	24769403	#N/A	rp
FAUX	(2R)-1-{[(2-Aminoethoxy)(hydroxy)phosphoryl]oxy}-3-hydroxy-2-propanyl(4Z,7Z,10Z,13Z,16Z)-4,7,10,13,16-docosapentaenoate@16.451-rp	(2R)-1-{[(2-Aminoethoxy)(hydroxy)phosphoryl]oxy}-3-hydroxy-2-propanyl(4Z,7Z,10Z,13Z,16Z)-4,7,10,13,16-docosapentaenoate	527.301	16.451	C27H46NO7P	24769374	#N/A	rp
FAUX	527.32222@15.564-rp	#N/A	527.322	15.564	C24H50NO9P	#N/A	#N/A	rp
FAUX	527.99544@0.943-rp	#N/A	527.995	0.943	C10H24ClO16P3	#N/A	#N/A	rp
FAUX	529.31687@16.746-rp	#N/A	529.317	16.746	C19H47N9O4S2	#N/A	#N/A	rp
FAUX	529.97353@0.926-rp	#N/A	529.974	0.926	C9H16N4O16P2S	#N/A	#N/A	rp
FAUX	530.04505@0.862-rp	#N/A	530.045	0.862	C16H18N8O7S3	#N/A	#N/A	rp
FAUX	530.2491@10.99-rp	#N/A	530.249	10.99	C21H42N2O11S	#N/A	#N/A	rp
FAUX	530.43084@19.84-rp	#N/A	530.431	19.84	C24H55N10OP	#N/A	#N/A	rp
FAUX	531.09056@8.113-rp	#N/A	531.091	8.113	C18H23N5O10P2	#N/A	#N/A	rp
FAUX	531.28665@11.778-rp	#N/A	531.287	11.778	C22H45NO13	#N/A	#N/A	rp
FAUX	531.28687@11.156-rp	#N/A	531.287	11.156	C24H48N5P3S	#N/A	#N/A	rp
FAUX	531.30926@17.184-rp	#N/A	531.309	17.184	C25H47ClN5O3P	#N/A	#N/A	rp
FAUX	532.31786@12.719-rp	#N/A	532.318	12.719	C34H44O5	#N/A	#N/A	rp
FAUX	532.31798@11.914-rp	#N/A	532.318	11.914	C27H54N2P2S2	#N/A	#N/A	rp
FAUX	533.10624@9.844-rp	#N/A	533.106	9.844	C17H29NO14P2	#N/A	#N/A	rp
FAUX	533.2785@17.187-rp	#N/A	533.279	17.187	C16H39N9O11	#N/A	#N/A	rp
FAUX	533.28719@17.203-rp	#N/A	533.287	17.203	C25H48N3O3PS2	#N/A	#N/A	rp
FAUX	534.46187@20.97-rp	#N/A	534.462	20.97	C29H62N2O6	#N/A	#N/A	rp
FAUX	2-Methyl-2-propanylN-[5-bromo-3,6,16,19-tetraoxopentacyclo[6.6.6.0~2,7~.0~9,14~.0~15,20~]icosa-2(7),4,9,11,13,15(20),17-heptaen-4-yl]-beta-alaninate@0.911-rp	2-Methyl-2-propanylN-[5-bromo-3,6,16,19-tetraoxopentacyclo[6.6.6.0~2,7~.0~9,14~.0~15,20~]icosa-2(7),4,9,11,13,15(20),17-heptaen-4-yl]-beta-alaninate	535.065	0.911	C27H22BrNO6	14455654	#N/A	rp
FAUX	535.28873@16.261-rp	#N/A	535.289	16.261	C21H42N7O7P	#N/A	#N/A	rp
FAUX	536.06575@0.911-rp	#N/A	536.066	0.911	C14H17N8O13P	#N/A	#N/A	rp
FAUX	537.37895@19.977-rp	#N/A	537.379	19.977	C29H51N3O6	#N/A	#N/A	rp
FAUX	538.02394@0.907-rp	#N/A	538.024	0.907	C11H25O18P3	#N/A	#N/A	rp
FAUX	538.33834@17.183-rp	#N/A	538.338	17.183	C26H47N6O4P	#N/A	#N/A	rp
FAUX	539.34157@17.171-rp	#N/A	539.342	17.171	C28H58ClNS3	#N/A	#N/A	rp
FAUX	539.3579@16.985-rp	#N/A	539.358	16.985	C22H50N7O6P	#N/A	#N/A	rp
FAUX	540.14522@1.082-rp	#N/A	540.145	1.082	C15H35ClN6O7P2S	#N/A	#N/A	rp
FAUX	541.31337@16.695-rp	#N/A	541.313	16.695	C24H44N7O5P	#N/A	#N/A	rp
FAUX	541.31492@16.061-rp	#N/A	541.315	16.061	C24H44N7O5P	#N/A	#N/A	rp
FAUX	541.33778@16.372-rp	#N/A	541.338	16.372	C25H52NO9P	#N/A	#N/A	rp
FAUX	542.31952@16.058-rp	#N/A	542.32	16.058	C20H48N8O5P2	#N/A	#N/A	rp
FAUX	543.32906@17.673-rp	#N/A	543.329	17.673	C24H46N7O5P	#N/A	#N/A	rp
FAUX	PCae(20:4)@16.746-rp	PCae(20:4)	543.331	16.746	C28H50NO7P	#N/A	#N/A	rp
FAUX	545.3468@18.954-rp	#N/A	545.347	18.954	C24H48N7O5P	#N/A	#N/A	rp
FAUX	PCae(20:3)@17.371-rp	PCae(20:3)	545.347	17.371	C28H52NO7P	#N/A	#N/A	rp
FAUX	545.94759@0.929-rp	#N/A	545.948	0.929	C12H10N4O17S2	#N/A	#N/A	rp
FAUX	546.02219@0.87-rp	#N/A	546.022	0.87	C15H21N2O14P3	#N/A	#N/A	rp
FAUX	546.34838@18.948-rp	#N/A	546.348	18.948	C21H51N6O8P	#N/A	#N/A	rp
FAUX	546.35027@17.366-rp	#N/A	546.35	17.366	C22H47N10O4P	#N/A	#N/A	rp
FAUX	547.36331@18.276-rp	#N/A	547.363	18.276	C32H56NP3	#N/A	#N/A	rp
FAUX	549.0913@3.052-rp	#N/A	549.091	3.052	C27H19NO12	#N/A	#N/A	rp
FAUX	PCae(20:1)@19.374-rp	PCae(20:1)	549.379	19.374	C28H56NO7P	#N/A	#N/A	rp
FAUX	551.28947@17.177-rp	#N/A	551.289	17.177	C18H48N7O6P3	#N/A	#N/A	rp
FAUX	552.03938@0.909-rp	#N/A	552.039	0.909	C15H18N6O13P2	#N/A	#N/A	rp
FAUX	553.3379@16.099-rp	#N/A	553.338	16.099	C27H58NO2P3S	#N/A	#N/A	rp
FAUX	555.12997@1.406-rp	#N/A	555.13	1.406	C29H26N5OPS2	#N/A	#N/A	rp
FAUX	555.3095@16.708-rp	#N/A	555.309	16.708	C21H48ClN9O2P2	#N/A	#N/A	rp
FAUX	555.3537@17.182-rp	#N/A	555.354	17.182	C27H50N5O5P	#N/A	#N/A	rp
FAUX	555.43413@18.574-rp	#N/A	555.434	18.574	C23H58N9O4P	#N/A	#N/A	rp
FAUX	556.12087@0.897-rp	#N/A	556.121	0.897	C14H30N4O15P2	#N/A	#N/A	rp
FAUX	557.27862@16.71-rp	#N/A	557.279	16.71	C27H41N7O2P2	#N/A	#N/A	rp
FAUX	558.36189@17.175-rp	#N/A	558.362	17.175	C20H50N10O6S	#N/A	#N/A	rp
FAUX	559.28872@15.922-rp	#N/A	559.289	15.922	C22H43N9O4P2	#N/A	#N/A	rp
FAUX	559.3026@17.657-rp	#N/A	559.303	17.657	C26H41N9O3S	#N/A	#N/A	rp
FAUX	561.31857@18.942-rp	#N/A	561.319	18.942	C27H52N3O3PS2	#N/A	#N/A	rp
FAUX	562.33844@16.708-rp	#N/A	562.338	16.708	C27H51N2O8P	#N/A	#N/A	rp
FAUX	564.05514@0.928-rp	#N/A	564.055	0.928	C10H17N10O16P	#N/A	#N/A	rp
FAUX	564.35389@17.661-rp	#N/A	564.354	17.661	C27H53N2O8P	#N/A	#N/A	rp
FAUX	566.27681@13.874-rp	#N/A	566.277	13.874	C22H46O16	#N/A	Other	rp
FAUX	566.36957@18.957-rp	#N/A	566.37	18.957	C23H51N8O6P	#N/A	#N/A	rp
FAUX	PCae(22:6)@16.818-rp	PCae(22:6)	567.331	16.818	C30H50NO7P	#N/A	#N/A	rp
FAUX	568.0135@0.912-rp	#N/A	568.014	0.912	C18H12N6O14S	#N/A	#N/A	rp
FAUX	568.03389@0.897-rp	#N/A	568.034	0.897	C15H18N6O14P2	#N/A	#N/A	rp
FAUX	569.31347@13.864-rp	#N/A	569.313	13.864	C29H48NO8P	#N/A	#N/A	rp
FAUX	PCae(22:5)@17.294-rp	PCae(22:5)	569.347	17.294	C30H52NO7P	#N/A	#N/A	rp
FAUX	569.36933@18.046-rp	#N/A	569.369	18.046	C27H56NO9P	#N/A	#N/A	rp
FAUX	571.34846@15.55-rp	#N/A	571.348	15.55	C21H51N9O5P2	#N/A	#N/A	rp
FAUX	571.95826@0.95-rp	#N/A	571.958	0.95	C11H15ClN4O17P2	#N/A	#N/A	rp
FAUX	572.29353@13.34-rp	#N/A	572.294	13.34	C25H47N6O3P3	#N/A	#N/A	rp
FAUX	572.29385@13.87-rp	#N/A	572.294	13.87	C25H47N6O3P3	#N/A	#N/A	rp
FAUX	574.00835@0.884-rp	#N/A	574.008	0.884	C14H10N10O14S	#N/A	#N/A	rp
FAUX	575.25113@16.707-rp	#N/A	575.251	16.707	C27H47ClN3O2PS2	#N/A	#N/A	rp
FAUX	5a,7a-Dimethyl-2-oxo-2,3,4,5,5a,5b,6,7,7a,8,9,10,10a,10b,11,12-hexadecahydrocyclopenta[5,6]naphtho[1,2-d]azepin-8-yl{4-[bis(2-chloroethyl)amino]phenoxy}acetate@16.732-rp	5a,7a-Dimethyl-2-oxo-2,3,4,5,5a,5b,6,7,7a,8,9,10,10a,10b,11,12-hexadecahydrocyclopenta[5,6]naphtho[1,2-d]azepin-8-yl{4-[bis(2-chloroethyl)amino]phenoxy}acetate	576.254	16.732	C31H42Cl2N2O4	133180	#N/A	rp
FAUX	577.24577@17.193-rp	#N/A	577.246	17.193	C32H31N7O4	#N/A	#N/A	rp
FAUX	577.26703@17.672-rp	#N/A	577.267	17.672	C24H54ClN3P2S3	#N/A	#N/A	rp
FAUX	577.33803@16.008-rp	#N/A	577.338	16.008	C27H53N3O6P2	#N/A	#N/A	rp
FAUX	579.35364@16.709-rp	#N/A	579.354	16.709	C29H50N5O5P	#N/A	#N/A	rp
FAUX	580.0288@0.924-rp	#N/A	580.029	0.924	C6H18N10O18P2	#N/A	#N/A	rp
FAUX	581.27837@16.752-rp	#N/A	581.278	16.752	C26H50NO7P3	#N/A	#N/A	rp
FAUX	581.28691@16.767-rp	#N/A	581.287	16.767	C39H39N3S	#N/A	#N/A	rp
FAUX	581.36911@17.661-rp	#N/A	581.369	17.661	C29H52N5O5P	#N/A	#N/A	rp
FAUX	581.98465@0.918-rp	#N/A	581.985	0.918	C12H12N10O12P2S	#N/A	#N/A	rp
FAUX	582.46189@20.364-rp	#N/A	582.462	20.364	C26H62N8O4S	#N/A	#N/A	rp
FAUX	583.28865@16.05-rp	#N/A	583.289	16.05	C27H37N9O6	#N/A	#N/A	rp
FAUX	583.38478@18.956-rp	#N/A	583.385	18.956	C28H58NO9P	#N/A	#N/A	rp
FAUX	584.2494@13.877-rp	#N/A	584.249	13.877	C31H48Cl2O2P2	#N/A	#N/A	rp
FAUX	1-(1,3-benzodioxol-5-yl)-3-[(3R,9S,10S)-9-[(dimethylamino)methyl]-12-[(2S)-1-hydroxypropan-2-yl]-3,10-dimethyl-13-oxo-2,8-dioxa-12-azabicyclo[12.4.0]octadeca-1(14),15,17-trien-16-yl]urea@12.01-rp	1-(1,3-benzodioxol-5-yl)-3-[(3R,9S,10S)-9-[(dimethylamino)methyl]-12-[(2S)-1-hydroxypropan-2-yl]-3,10-dimethyl-13-oxo-2,8-dioxa-12-azabicyclo[12.4.0]octadeca-1(14),15,17-trien-16-yl]urea	584.32	12.01	C31H44N4O7	58165247	#N/A	rp
FAUX	586.33816@16.751-rp	#N/A	586.338	16.751	C33H53N2OP3	#N/A	#N/A	rp
FAUX	586.49319@21.307-rp	#N/A	586.493	21.307	C35H73P3	#N/A	#N/A	rp
FAUX	587.28647@13.857-rp	#N/A	587.286	13.857	C24H53N5OS5	#N/A	#N/A	rp
FAUX	588.26775@13.87-rp	#N/A	588.268	13.87	C25H37N10O5P	#N/A	#N/A	rp
FAUX	N-(1-Carboxy-5-(4-(3-isopropylamino-2-hydroxypropoxy)indole-2-carboxamido)pentyl)-alanyl-proline@16.812-rp	N-(1-Carboxy-5-(4-(3-isopropylamino-2-hydroxypropoxy)indole-2-carboxamido)pentyl)-alanyl-proline	589.313	16.812	C29H43N5O8	10751917	#N/A	rp
FAUX	589.98521@0.889-rp	#N/A	589.985	0.889	C14H25O15P3S2	#N/A	#N/A	rp
FAUX	591.14785@10.993-rp	#N/A	591.148	10.993	C31H30NO7PS	#N/A	#N/A	rp
FAUX	592.27758@17.189-rp	#N/A	592.278	17.189	C29H53ClN2S4	#N/A	#N/A	rp
FAUX	596.00242@0.923-rp	#N/A	596.002	0.923	C20H11N10O7P3	#N/A	#N/A	rp
FAUX	596.29616@16.209-rp	#N/A	596.296	16.209	C26H50N2O9P2	#N/A	#N/A	rp
FAUX	598.43532@20.355-rp	#N/A	598.435	20.355	C35H67OPS2	#N/A	#N/A	rp
FAUX	599.25135@16.753-rp	#N/A	599.251	16.753	C29H49N3S5	#N/A	#N/A	rp
FAUX	599.31676@17.181-rp	#N/A	599.317	17.181	C21H46N9O9P	#N/A	#N/A	rp
FAUX	600.0839@0.916-rp	#N/A	600.084	0.916	C18H26N4O15P2	#N/A	#N/A	rp
FAUX	601.247@16.722-rp	#N/A	601.247	16.722	C24H40N7O7PS	#N/A	#N/A	rp
FAUX	601.33791@16.059-rp	#N/A	601.338	16.059	C32H47N3O8	#N/A	#N/A	rp
FAUX	602.09498@0.912-rp	#N/A	602.095	0.912	C18H24N10O8P2S	#N/A	#N/A	rp
FAUX	602.26064@9.842-rp	#N/A	602.261	9.842	C27H43N2O11P	#N/A	#N/A	rp
FAUX	602.2848@16.359-rp	#N/A	602.285	16.359	C29H47O11P	#N/A	#N/A	rp
FAUX	603.35321@16.75-rp	#N/A	603.353	16.75	C30H54NO9P	#N/A	#N/A	rp
FAUX	605.27853@16.82-rp	#N/A	605.279	16.82	C26H43N3O13	#N/A	#N/A	rp
FAUX	605.28679@16.806-rp	#N/A	605.287	16.806	C27H44N9OPS2	#N/A	#N/A	rp
FAUX	605.36906@17.379-rp	#N/A	605.369	17.379	C30H56NO9P	#N/A	#N/A	rp
FAUX	606.37258@17.369-rp	#N/A	606.373	17.369	C22H56N8O7P2	#N/A	#N/A	rp
FAUX	606.46174@20.322-rp	#N/A	606.462	20.322	C37H67O2PS	#N/A	#N/A	rp
FAUX	607.28851@16.141-rp	#N/A	607.289	16.141	C26H46N3O11P	#N/A	#N/A	rp
FAUX	610.28861@17.183-rp	#N/A	610.289	17.183	C21H51ClN8O4S3	#N/A	#N/A	rp
FAUX	610.33811@16.815-rp	#N/A	610.338	16.815	C35H51N2O3PS	#N/A	#N/A	rp
FAUX	611.97644@0.925-rp	#N/A	611.976	0.925	C17H8N8O16S	#N/A	#N/A	rp
FAUX	612.04821@0.864-rp	#N/A	612.048	0.864	C22H20N4O13S2	#N/A	#N/A	rp
FAUX	612.15113@1.426-rp	#N/A	612.151	1.426	C17H39N6O8P3S2	#N/A	Metabolic pathways;Other	rp
FAUX	613.1734@14.582-rp	#N/A	613.173	14.582	C31H38NO4P3S	#N/A	#N/A	rp
FAUX	613.26808@17.185-rp	#N/A	613.268	17.185	C29H39N7O6S	#N/A	#N/A	rp
FAUX	614.17682@14.577-rp	#N/A	614.177	14.577	#N/A	#N/A	#N/A	rp
FAUX	617.06785@0.91-rp	#N/A	617.068	0.91	#N/A	#N/A	#N/A	rp
FAUX	617.23829@17.2-rp	#N/A	617.238	17.2	C30H39N3O9S	#N/A	#N/A	rp
FAUX	618.06885@0.91-rp	#N/A	618.069	0.91	C13H19N10O17P	#N/A	#N/A	rp
FAUX	619.1792@12.83-rp	#N/A	619.179	12.83	C31H29N3O11	#N/A	#N/A	rp
FAUX	620.02658@0.913-rp	#N/A	620.027	0.913	C11H23N6O18P3	#N/A	#N/A	rp
FAUX	620.29611@16.36-rp	#N/A	620.296	16.36	C26H41N10O6P	#N/A	#N/A	rp
FAUX	620.30905@18.956-rp	#N/A	620.309	18.956	C26H51ClN8OP2S	#N/A	#N/A	rp
FAUX	623.25126@16.826-rp	#N/A	623.251	16.826	C26H49N5O2S5	#N/A	#N/A	rp
FAUX	623.31711@16.708-rp	#N/A	623.317	16.708	C24H52N9O2P3S	#N/A	#N/A	rp
FAUX	627.3533@16.82-rp	#N/A	627.353	16.82	C32H54NO9P	#N/A	#N/A	rp
FAUX	627.95061@0.926-rp	#N/A	627.951	0.926	C11H22N2O18P2S3	#N/A	#N/A	rp
FAUX	628.02529@0.873-rp	#N/A	628.025	0.873	C13H22N6O17P2S	#N/A	#N/A	rp
FAUX	628.3567@16.816-rp	#N/A	628.357	16.816	C24H54N8O7P2	#N/A	#N/A	rp
FAUX	629.01741@0.92-rp	#N/A	629.017	0.92	#N/A	#N/A	#N/A	rp
FAUX	629.36911@17.295-rp	#N/A	629.369	17.295	C39H51NO6	#N/A	#N/A	rp
FAUX	3,4-dihydroxy-5-all-trans-heptaprenylbenzoicacid@20.311-rp	3,4-dihydroxy-5-all-trans-heptaprenylbenzoicacid	630.462	20.311	C42H62O4	4447161	#N/A	rp
FAUX	633.17998@14.581-rp	#N/A	633.18	14.581	C35H24N9O2P	#N/A	#N/A	rp
FAUX	634.04233@0.909-rp	#N/A	634.042	0.909	C14H20N8O17P2	#N/A	#N/A	rp
FAUX	637.26794@16.708-rp	#N/A	637.268	16.708	C27H39N7O11	#N/A	#N/A	rp
FAUX	637.35632@17.186-rp	#N/A	637.356	17.186	C26H52N7O9P	#N/A	#N/A	rp
FAUX	638.12384@0.897-rp	#N/A	638.124	0.897	C16H37N2O18P3	#N/A	#N/A	rp
FAUX	638.31998@18.958-rp	#N/A	638.32	18.958	C35H55ClO4S2	#N/A	#N/A	rp
FAUX	639.28373@17.663-rp	#N/A	639.284	17.663	C29H46N5O7PS	#N/A	#N/A	rp
FAUX	641.23806@16.707-rp	#N/A	641.238	16.707	C33H38N7OP3	#N/A	#N/A	rp
FAUX	641.29934@18.962-rp	#N/A	641.299	18.962	C34H49N3O3P2S	#N/A	#N/A	rp
FAUX	645.26996@18.957-rp	#N/A	645.27	18.957	C35H39N3O9	#N/A	#N/A	rp
FAUX	646.05834@0.922-rp	#N/A	646.058	0.922	C15H28N4O18P2S	#N/A	#N/A	rp
FAUX	650.0161@0.912-rp	#N/A	650.016	0.912	C17H14N8O18S	#N/A	#N/A	rp
FAUX	653.33001@17.186-rp	#N/A	653.33	17.186	C25H56N3O12PS	#N/A	#N/A	rp
FAUX	656.01159@0.886-rp	#N/A	656.012	0.886	C15H19N10O12P3S	#N/A	#N/A	rp
FAUX	661.26757@16.748-rp	#N/A	661.268	16.748	C41H43NO3S2	#N/A	#N/A	rp
FAUX	661.35622@16.709-rp	#N/A	661.356	16.709	C26H57N5O10P2	#N/A	#N/A	rp
FAUX	662.03189@0.923-rp	#N/A	662.032	0.923	C19H25N2O18P3	#N/A	#N/A	rp
FAUX	663.03541@0.925-rp	#N/A	663.035	0.925	C22H20N9O8P3S	#N/A	#N/A	rp
FAUX	663.37191@17.67-rp	#N/A	663.372	17.67	C31H60N3O6P3	#N/A	#N/A	rp
FAUX	663.98707@0.917-rp	#N/A	663.987	0.917	C9H19N10O17P3S	#N/A	#N/A	rp
FAUX	665.38751@18.957-rp	#N/A	665.388	18.957	C27H57N9O6P2	#N/A	#N/A	rp
FAUX	671.98832@0.889-rp	#N/A	671.988	0.889	C14H15N10O16P3	#N/A	#N/A	rp
FAUX	673.19529@14.575-rp	#N/A	673.195	14.575	C38H28N9PS	#N/A	#N/A	rp
FAUX	675.19124@14.588-rp	#N/A	675.191	14.588	C39H35NO6P2	#N/A	#N/A	rp
FAUX	677.33079@16.707-rp	#N/A	677.331	16.707	C28H55NO15S	#N/A	#N/A	rp
FAUX	678.00537@0.922-rp	#N/A	678.005	0.922	C22H21N2O17P3	#N/A	#N/A	rp
FAUX	680.0422@0.923-rp	#N/A	680.042	0.923	C20H23N6O15P3	#N/A	#N/A	rp
FAUX	682.08661@0.916-rp	#N/A	682.087	0.916	C20H32N2O18P2S	#N/A	#N/A	rp
FAUX	684.0984@0.911-rp	#N/A	684.098	0.911	C18H27N10O13P3	#N/A	#N/A	rp
FAUX	685.35668@16.755-rp	#N/A	685.357	16.755	C31H51N5O12	#N/A	#N/A	rp
FAUX	693.97937@0.924-rp	#N/A	693.979	0.924	C16H20N6O17P2S2	#N/A	#N/A	rp
FAUX	694.05189@0.865-rp	#N/A	694.052	0.865	C19H22N10O13S3	#N/A	#N/A	rp
FAUX	697.17158@14.578-rp	#N/A	697.172	14.578	C41H34NO4P3	#N/A	#N/A	rp
FAUX	699.07112@0.91-rp	#N/A	699.071	0.91	#N/A	#N/A	#N/A	rp
FAUX	700.07219@0.91-rp	#N/A	700.072	0.91	C21H23N10O12P3	#N/A	#N/A	rp
FAUX	702.19829@1.064-rp	#N/A	702.198	1.064	C19H40ClN8O16P	#N/A	#N/A	rp
FAUX	707.50451@27.624-rp	#N/A	707.505	27.624	C51H65NO	#N/A	#N/A	rp
FAUX	709.3567@16.827-rp	#N/A	709.357	16.827	C33H61NO9P2S	#N/A	#N/A	rp
FAUX	710.02861@0.874-rp	#N/A	710.029	0.874	C19H21N8O16P3	#N/A	#N/A	rp
FAUX	713.14488@14.58-rp	#N/A	713.145	14.58	C39H27N3O9S	#N/A	#N/A	rp
FAUX	716.0457@0.908-rp	#N/A	716.046	0.908	C20H17N10O18P	#N/A	#N/A	rp
FAUX	719.35972@17.191-rp	#N/A	719.36	17.191	C29H56N9O6P3	#N/A	#N/A	rp
FAUX	720.12691@0.898-rp	#N/A	720.127	0.898	C18H30N10O17P2	#N/A	#N/A	rp
FAUX	728.06017@0.919-rp	#N/A	728.06	0.919	C18H22N10O18P2	#N/A	#N/A	rp
FAUX	732.01909@0.911-rp	#N/A	732.019	0.911	C22H27N2O18P3S	#N/A	#N/A	rp
FAUX	737.93448@0.915-rp	#N/A	737.934	0.915	C18H13N8O17P3S	#N/A	#N/A	rp
FAUX	738.01422@0.888-rp	#N/A	738.014	0.888	C23H21N10O9P3S2	#N/A	#N/A	rp
FAUX	743.35967@16.703-rp	#N/A	743.36	16.703	C35H58N3O10PS	#N/A	#N/A	rp
FAUX	744.03483@0.922-rp	#N/A	744.035	0.922	C19H23N8O18P3	#N/A	#N/A	rp
FAUX	753.28815@13.864-rp	#N/A	753.288	13.864	C32H53NO15P2	#N/A	#N/A	rp
FAUX	753.98999@0.893-rp	#N/A	753.99	0.893	C21H21N6O17P3S	#N/A	#N/A	rp
FAUX	760.0083@0.921-rp	#N/A	760.008	0.921	C22H19N8O17P3	#N/A	#N/A	rp
FAUX	762.04542@0.919-rp	#N/A	762.045	0.919	C18H24N10O18P2S	#N/A	#N/A	rp
FAUX	764.08987@0.913-rp	#N/A	764.09	0.913	C19H31N10O15P3S	#N/A	#N/A	rp
FAUX	775.98229@0.923-rp	#N/A	775.982	0.923	C24H12N10O17S2	#N/A	#N/A	rp
FAUX	776.05538@0.869-rp	#N/A	776.055	0.869	C24H33N4O15PS4	#N/A	#N/A	rp
FAUX	781.07495@0.908-rp	#N/A	781.075	0.908	#N/A	#N/A	#N/A	rp
FAUX	782.07624@0.909-rp	#N/A	782.076	0.909	C24H29N6O18P3	#N/A	#N/A	rp
FAUX	792.03175@0.867-rp	#N/A	792.032	0.867	C25H18N10O17P2	#N/A	#N/A	rp
FAUX	793.02483@0.922-rp	#N/A	793.025	0.922	C25H26N5O17P3S	#N/A	#N/A	rp
FAUX	798.04972@0.907-rp	#N/A	798.05	0.907	C27H25N6O17P3	#N/A	#N/A	rp
FAUX	802.13077@0.9-rp	#N/A	802.131	0.9	C31H37N2O17P3	#N/A	#N/A	rp
FAUX	808.99675@0.914-rp	#N/A	808.997	0.914	C31H18N5O16P3	#N/A	#N/A	rp
FAUX	810.06267@0.918-rp	#N/A	810.063	0.918	C31H29N2O18P3	#N/A	#N/A	rp
FAUX	814.023@0.91-rp	#N/A	814.023	0.91	C30H29N2O15P3S2	#N/A	#N/A	rp
FAUX	820.01725@0.886-rp	#N/A	820.017	0.886	C34H13N8O16P	#N/A	#N/A	rp
FAUX	825.03771@0.921-rp	#N/A	825.038	0.921	#N/A	#N/A	#N/A	rp
FAUX	826.03775@0.921-rp	#N/A	826.038	0.921	C27H25N8O15P3S	#N/A	#N/A	rp
FAUX	842.01075@0.92-rp	#N/A	842.011	0.92	#N/A	#N/A	#N/A	rp
FAUX	844.40712@9.047-rp	#N/A	844.407	9.047	C38H71O14P3	#N/A	#N/A	rp
FAUX	857.98458@0.922-rp	#N/A	857.985	0.922	C32H21N4O17P3S	#N/A	#N/A	rp
FAUX	864.08019@0.908-rp	#N/A	864.08	0.908	C29H25N10O18PS	#N/A	#N/A	rp
FAUX	880.05368@0.907-rp	#N/A	880.054	0.907	#N/A	#N/A	#N/A	rp
FAUX	883.56262@17.616-rp	#N/A	883.563	17.616	C42H81N3O16	#N/A	#N/A	rp
FAUX	884.13494@0.898-rp	#N/A	884.135	0.898	C37H34N4O18P2	#N/A	#N/A	rp
FAUX	896.02714@0.909-rp	#N/A	896.027	0.909	C38H23N6O13P3S	#N/A	#N/A	rp
FAUX	908.04053@0.921-rp	#N/A	908.041	0.921	C34H23N8O17P3	#N/A	#N/A	rp
FAUX	924.01414@0.918-rp	#N/A	924.014	0.918	#N/A	#N/A	#N/A	rp
FAUX	939.98674@0.921-rp	#N/A	939.987	0.921	C32H19N10O17P3S	#N/A	#N/A	rp
FAUX	946.08403@0.907-rp	#N/A	946.084	0.907	#N/A	#N/A	#N/A	rp
FAUX	946.55875@9.368-rp	#N/A	946.559	9.368	C41H83N6O16P	#N/A	#N/A	rp
FAUX	957.4911@9.926-rp	#N/A	957.491	9.926	C35H77N9O17P2	#N/A	#N/A	rp
FAUX	962.05769@0.906-rp	#N/A	962.058	0.906	C39H29N6O16P3S	#N/A	#N/A	rp
FAUX	978.03115@0.909-rp	#N/A	978.031	0.909	C42H25N6O15P3S	#N/A	#N/A	rp
FAUX	990.04283@0.92-rp	#N/A	990.043	0.92	#N/A	#N/A	#N/A	rp
FAUX	1006.01649@0.918-rp	#N/A	1006.02	0.918	#N/A	#N/A	#N/A	rp
FAUX	1006.51805@0.908-rp	#N/A	1006.52	0.908	#N/A	#N/A	#N/A	rp
FAUX	1028.08581@0.907-rp	#N/A	1028.09	0.907	#N/A	#N/A	#N/A	rp
FAUX	1028.60869@17.177-rp	#N/A	1028.61	17.177	C40H89N10O18P	#N/A	#N/A	rp
FAUX	1036.07405@0.908-rp	#N/A	1036.07	0.908	#N/A	#N/A	#N/A	rp
FAUX	1039.66557@16.698-rp	#N/A	1039.67	16.698	C46H98N5O18P	#N/A	#N/A	rp
FAUX	1044.05916@0.906-rp	#N/A	1044.06	0.906	#N/A	#N/A	#N/A	rp
FAUX	1046.58267@17.179-rp	#N/A	1046.58	17.179	C46H95ClN10O4S5	#N/A	#N/A	rp
FAUX	1050.68723@17.18-rp	#N/A	1050.69	17.18	C51H100N6O12P2	#N/A	#N/A	rp
FAUX	1051.69111@17.204-rp	#N/A	1051.69	17.204	C50H98N7O14P	#N/A	#N/A	rp
FAUX	1060.03304@0.909-rp	#N/A	1060.03	0.909	#N/A	#N/A	#N/A	rp
FAUX	1062.66084@16.724-rp	#N/A	1062.66	16.724	C49H100N4O16P2	#N/A	#N/A	rp
FAUX	1072.04595@0.922-rp	#N/A	1072.05	0.922	#N/A	#N/A	#N/A	rp
FAUX	1076.60818@16.702-rp	#N/A	1076.61	16.702	#N/A	#N/A	#N/A	rp
FAUX	1084.64128@16.732-rp	#N/A	1084.64	16.732	#N/A	#N/A	#N/A	rp
FAUX	1088.01891@0.916-rp	#N/A	1088.02	0.916	#N/A	#N/A	#N/A	rp
FAUX	1094.58195@16.703-rp	#N/A	1094.58	16.703	C66H92ClO5PS2	#N/A	#N/A	rp
FAUX	1098.68863@16.707-rp	#N/A	1098.69	16.707	C61H99N2O13P	#N/A	#N/A	rp
FAUX	1110.08997@0.912-rp	#N/A	1110.09	0.912	#N/A	#N/A	#N/A	rp
FAUX	1118.57905@16.748-rp	#N/A	1118.58	16.748	C43H94N10O15S4	#N/A	#N/A	rp
FAUX	1122.68834@16.741-rp	#N/A	1122.69	16.741	C47H99N10O18P	#N/A	#N/A	rp
FAUX	1142.03657@0.91-rp	#N/A	1142.04	0.91	C67H140N5O4PS	#N/A	#N/A	rp
FAUX	1170.02275@0.919-rp	#N/A	1170.02	0.919	#N/A	#N/A	#N/A	rp
FAUX	1226.67564@9.8-rp	#N/A	1226.68	9.8	C56H105N6O17P3	#N/A	#N/A	rp
FAUX	1258.03525@0.92-rp	#N/A	1258.04	0.92	C64H140N9O12P	#N/A	#N/A	rp
FAUX	1274.00861@0.917-rp	#N/A	1274.01	0.917	#N/A	#N/A	#N/A	rp
FAUX	1289.9819@0.918-rp	#N/A	1289.98	0.918	#N/A	#N/A	#N/A	rp
FAUX	1340.03814@0.92-rp	#N/A	1340.04	0.92	#N/A	#N/A	#N/A	rp
FAUX	1354.56552@8.246-rp	#N/A	1354.57	8.246	C72H89N6O14P3	#N/A	Metabolic pathways;Other	rp
FAUX	1371.98398@0.921-rp	#N/A	1371.98	0.921	C69H142N7O13PS2	#N/A	#N/A	rp
FAUX	1422.04067@0.916-rp	#N/A	1422.04	0.916	#N/A	#N/A	#N/A	rp
FAUX	1423.64499@7.812-rp	#N/A	1423.64	7.812	C73H100N7O16P3	#N/A	#N/A	rp
FAUX	1438.01389@0.915-rp	#N/A	1438.01	0.915	#N/A	#N/A	#N/A	rp
FAUX	1453.98819@0.915-rp	#N/A	1453.99	0.915	C68H146N9O15P3S	#N/A	#N/A	rp
FAUX	1478.6985@7.16-rp	#N/A	1478.7	7.16	C73H108N8O18P2S	#N/A	#N/A	rp
FAUX	1535.99007@0.917-rp	#N/A	1535.99	0.917	#N/A	#N/A	#N/A	rp
FAUX	1538.67295@8.139-rp	#N/A	1538.67	8.139	C76H104N10O18P2S	#N/A	#N/A	rp
FAUX	1579.74627@7.11-rp	#N/A	1579.75	7.11	C85H111N7O18P2	#N/A	#N/A	rp
FAUX	1586.0466@0.915-rp	#N/A	1586.05	0.915	#N/A	#N/A	#N/A	rp
FAUX	1602.01976@0.915-rp	#N/A	1602.02	0.915	#N/A	#N/A	#N/A	rp
FAUX	1617.99411@0.92-rp	#N/A	1617.99	0.92	C87H150N3O16P3S	#N/A	#N/A	rp
FAUX	1639.7207@7.977-rp	#N/A	1639.72	7.977	C90H112N7O14P3S	#N/A	#N/A	rp
FAUX	1661.70431@7.974-rp	#N/A	1661.7	7.974	#N/A	#N/A	#N/A	rp
FAUX	1668.04991@0.916-rp	#N/A	1668.05	0.916	#N/A	#N/A	#N/A	rp
FAUX	1678.10457@0.905-rp	#N/A	1678.1	0.905	#N/A	#N/A	#N/A	rp
FAUX	1694.77263@7.416-rp	#N/A	1694.77	7.416	C90H120N8O16P2S2	#N/A	#N/A	rp
FAUX	1699.99545@0.918-rp	#N/A	1700	0.918	#N/A	#N/A	#N/A	rp
FAUX	Und-PP-MurNAc-Ala-Glu-diaminopimeloyl-Ala-Ala@0.919-rp	Und-PP-MurNAc-Ala-Glu-diaminopimeloyl-Ala-Ala	1715.97	0.919	C87H143N7O23P2	#N/A	Other	rp
FAUX	1744.12979@0.912-rp	#N/A	1744.13	0.912	#N/A	#N/A	#N/A	rp
FAUX	1750.05084@0.917-rp	#N/A	1750.05	0.917	#N/A	#N/A	#N/A	rp
FAUX	1766.02484@0.916-rp	#N/A	1766.02	0.916	#N/A	#N/A	#N/A	rp
FAUX	1781.99888@0.917-rp	#N/A	1782	0.917	#N/A	#N/A	#N/A	rp
FAUX	1795.82087@7.306-rp	#N/A	1795.82	7.306	#N/A	#N/A	#N/A	rp
FAUX	1797.82505@7.308-rp	#N/A	1797.83	7.308	#N/A	#N/A	#N/A	rp
FAUX	1817.8074@7.31-rp	#N/A	1817.81	7.31	#N/A	#N/A	#N/A	rp
FAUX	1832.05478@0.916-rp	#N/A	1832.05	0.916	#N/A	#N/A	#N/A	rp
FAUX	1842.10901@0.903-rp	#N/A	1842.11	0.903	#N/A	#N/A	#N/A	rp
FAUX	1848.02828@0.919-rp	#N/A	1848.03	0.919	#N/A	#N/A	#N/A	rp
FAUX	1849.03254@0.919-rp	#N/A	1849.03	0.919	#N/A	#N/A	#N/A	rp
FAUX	1858.08523@0.903-rp	#N/A	1858.09	0.903	#N/A	#N/A	#N/A	rp
FAUX	1914.05874@0.908-rp	#N/A	1914.06	0.908	#N/A	#N/A	#N/A	rp
FAUX	1924.11546@0.907-rp	#N/A	1924.12	0.907	#N/A	#N/A	#N/A	rp
FAUX	1925.1176@0.905-rp	#N/A	1925.12	0.905	#N/A	#N/A	#N/A	rp
FAUX	1930.0289@0.913-rp	#N/A	1930.03	0.913	#N/A	#N/A	#N/A	rp
FAUX	1940.09011@0.911-rp	#N/A	1940.09	0.911	#N/A	#N/A	#N/A	rp
FAUX	2006.11848@0.904-rp	#N/A	2006.12	0.904	#N/A	#N/A	#N/A	rp
FAUX	2012.03292@0.919-rp	#N/A	2012.03	0.919	#N/A	#N/A	#N/A	rp
FAUX	2025.2894@17.173-rp	#N/A	2025.29	17.173	#N/A	#N/A	#N/A	rp
FAUX	2088.11886@0.905-rp	#N/A	2088.12	0.905	#N/A	#N/A	#N/A	rp
FAUX	2089.12138@0.903-rp	#N/A	2089.12	0.903	#N/A	#N/A	#N/A	rp
FAUX	2120.06607@0.92-rp	#N/A	2120.07	0.92	#N/A	#N/A	#N/A	rp
FAUX	2144.0914@0.925-rp	#N/A	2144.09	0.925	#N/A	#N/A	#N/A	rp
FAUX	2176.03783@0.917-rp	#N/A	2176.04	0.917	#N/A	#N/A	#N/A	rp
FAUX	2252.12652@0.906-rp	#N/A	2252.13	0.906	#N/A	#N/A	#N/A	rp
FAUX	2253.1293@0.902-rp	#N/A	2253.13	0.902	#N/A	#N/A	#N/A	rp

## Sheet: Area
	plasma-690-ATB_25	plasma-692-ATB_27	plasma-686-ATB_21	plasma-688-ATB_23	plasma-691-ATB_26	plasma-694-ATB_29	plasma-666-FMT_1	plasma-670-FMT_5	plasma-683-FMT_18	plasma-682-FMT_17	plasma-678-FMT_13	plasma-669-FMT_4	plasma-668-FMT-AKK_3	plasma-675-FMT-AKK_10	plasma-680-FMT-AKK_15	plasma-679-FMT-AKK_14	plasma-672-FMT-AKK_7	plasma-674-FMT-AKK_9	plasma-667-FMT-AKK-Pas_2	plasma-681-FMT-AKK-Pas_16	plasma-676-FMT-AKK-Pas_11	plasma-677-FMT-AKK-Pas_12	plasma-671-FMT-AKK-Pas_6	Bl_matrice-plasma_3a	QC_plasma_4a	QC_plasma_4b	QC_plasma_4c	QC_plasma_4d	QC_plasma_4e	Bl_matrice-plasma_3b	plasma-684-SPF_19	plasma-685-SPF_20	plasma-689-SPF_24	plasma-687-SPF_22	plasma-693-SPF_28	plasma-695-SPF_30
3-acetamidopropanal@1.665-rp	317069	82894.8	337517	287600	328509	343237	273420	385655	287813	616856	4.99958e+06	1.7535e+06	3.12426e+07	3.51376e+07	2.85092e+07	3.46759e+07	2.98573e+07	2.5629e+07	5.5186e+06	9.42942e+06	1.73714e+07	5.47653e+06	1.19849e+06	39436.2	8.8903e+06	9.39068e+06	9.10663e+06	7.63319e+06	9.27696e+06	199991	232256	377109	67347.9	311958	78464.5	97800.2
3-Methylbenzol-1,2-diol@9.688-rp	31658.3	219238	104716	60445.7	135069	185265	227489	97405.5	325899	412195	941246	298149	2.83432e+06	2.73674e+06	2.25836e+06	3.94528e+06	2.98468e+06	4.47582e+06	332948	1.17715e+06	565083	315474	127385	199288	541501	799316	891691	969683	1.17008e+06	172997	25579.1	50793.7	182506	144726	23019.4	162048
2-Mercapto-2-methylpentan-4-one@9.689-rp	17370.2	17588.2	16527.2	17099.5	18493.2	18221.7	267187	125387	288117	351736	699603	229993	2.28085e+06	2.23951e+06	1.71186e+06	3.93113e+06	2.64723e+06	3.81932e+06	290740	1.02245e+06	473037	294611	104627	19982.9	528519	606565	732394	742518	874044	16266.7	17523	17268.3	17162.3	16319.9	16193.5	17054.9
5-Hydroxy-2,4-decadienoicacid?-lactone@9.688-rp	581063	699070	634014	368793	390527	307417	1.3146e+07	6.31199e+06	1.43588e+07	1.77754e+07	3.19812e+07	1.10691e+07	1.03839e+08	9.96922e+07	7.79762e+07	1.42441e+08	1.08241e+08	1.63531e+08	1.34453e+07	4.47407e+07	2.1111e+07	1.45259e+07	5.89854e+06	684148	2.35297e+07	2.93515e+07	3.33168e+07	3.34583e+07	3.8785e+07	659460	327305	636040	689188	658505	103901	330171
171.52677@9.687-rp	17132.4	16973.6	16300.9	16865.4	18240	15872.7	142201	31433.8	112733	134979	320594	87452	1.22494e+06	1.01987e+06	621005	1.69883e+06	1.00109e+06	1.49167e+06	139241	427622	210206	127220	30158.6	19709.3	259102	246583	305004	283003	283973	16044	17283.1	17031.9	16927.3	16096.5	15971.8	16821.4
(E)-Dacarbazine@7.639-rp	25900.4	28400.1	26651.3	26441.6	26118	27984.2	129560	56498.7	151730	213739	416140	112125	1.36637e+06	1.4822e+06	1.26713e+06	2.24357e+06	1.62723e+06	2.09181e+06	153566	607915	300032	171884	52974.1	26928.5	218637	372555	472168	405168	538235	25460	26172.6	25529	27373.6	26731.7	26092.6	26776.7
3-hexoxythiophene@9.688-rp	17238	17454.3	16401.4	16969.3	18352.4	15970.5	489539	214454	574870	817050	1.40946e+06	448713	4.76784e+06	4.50396e+06	3.4886e+06	6.89422e+06	4.97755e+06	7.52956e+06	606696	1.90101e+06	935673	615212	194713	19830.8	957151	1.25374e+06	1.42814e+06	1.4283e+06	1.70138e+06	16142.8	17389.5	17136.8	17031.6	16195.7	16070.2	16925
p-Cresylsulfate@7.481-rp	48852.3	102608	51743.2	53520	76301.4	99587.1	959232	502259	411566	994396	908424	2.13117e+06	1.43973e+07	1.18346e+07	4.81556e+06	1.29761e+07	5.2599e+06	1.93175e+07	481989	1.44272e+06	807381	423435	869247	48967.7	2.77007e+06	2.77457e+06	3.11453e+06	2.73723e+06	2.91326e+06	46185.8	324801	551746	289248	458566	382435	1.16112e+06
2-(2-methylthiopropyl)maleicacid@7.017-rp	22664.9	20628.5	22949.6	19065.2	21170.1	18232.4	38785.3	30159.6	42260	75344.7	103520	40247.9	700407	646627	453835	985416	483899	1.03491e+06	45939.9	149738	80341.5	58066.7	20412.3	18683.5	129761	159212	174717	173140	169367	20101.3	21011.7	19229.5	23029.6	19202.9	17316.5	20438.1
214.10257@14.264-rp	21610.1	25744.5	23796.4	23301.2	22119.1	23197.7	112098	23797.4	103838	207484	233548	331152	4.47796e+06	5.04443e+06	3.84128e+06	6.64948e+06	4.986e+06	7.85632e+06	161996	802452	942068	705439	106341	20868.7	855421	1.10511e+06	1.07552e+06	1.20408e+06	1.29803e+06	19789.1	23451	23397.2	22711.2	21945.3	20852.4	22996.1
222.12712@13.335-rp	277687	574850	211580	359480	1.17312e+06	1.11434e+06	1.11921e+06	432321	593576	1.07031e+06	2.68077e+06	1.07163e+06	16690.6	17309.1	16493.9	16230.6	15633.9	16441.2	169316	127913	100010	374395	291605	16690.6	460757	513879	510126	536199	515771	15809	567327	908103	125176	579884	126875	561053
Methyl(2E,4E)-6-hydroxy-10-sulfanyl-2,4-decadienoate@9.689-rp	85135.2	82122.7	77888.4	80202.3	131322	95844.6	5.76037e+07	2.61019e+07	6.25312e+07	8.06155e+07	1.5678e+08	5.23077e+07	4.51082e+08	4.76922e+08	3.50712e+08	6.8698e+08	4.99602e+08	7.64226e+08	6.25778e+07	2.13055e+08	1.01158e+08	6.07626e+07	2.47986e+07	93726.6	9.77246e+07	1.43292e+08	1.41422e+08	1.45594e+08	1.79487e+08	76198	96462.3	80994	80496.8	76545.9	75953	79333.3
4-[(3-Oxobutyl)sulfanyl]cyclohexanecarboxylicacid@7.811-rp	64683.1	52100.5	51573	50562.1	56270.1	53388.2	98228.7	73018.7	270573	129755	531423	49089.5	609729	961513	2.04157e+06	3.2846e+06	1.19666e+06	2.01552e+06	319974	541152	333084	166190	48639	53954.2	528809	492247	440034	451581	633776	51503.9	58361.3	53979.4	58969.9	51890.5	50141.8	51402.2
Ethyl2-[(tetrahydro-2H-pyran-4-ylsulfanyl)methyl]acrylate@8.095-rp	65359.7	69480.9	60476.4	58999.2	74518.1	64474.5	155870	64235.5	164625	106242	593780	79527.2	1.90806e+06	1.75352e+06	1.37286e+06	1.99667e+06	1.69021e+06	2.34825e+06	288887	730087	480686	316026	55818.2	60456.1	393352	581692	647804	622511	594044	53743.7	64356.3	59522.5	59971.6	62383.3	54007	61166.2
246.0922@6.568-rp	22847.5	22244.5	24252	20780.2	20691.1	20030.9	40013	21442.6	17058.4	30457.4	21596.5	30543.7	505119	409923	344604	747924	397430	861787	24805.4	96409.9	58513.2	32654.3	19173	19661.8	85844.6	115940	120840	118386	125784	17740.4	23081.3	21476.6	23401	19896	20830.8	22319
246.09234@10.672-rp	65319.1	67982.6	68333.3	68805.1	67443.3	67047.2	1.8479e+07	8.64101e+06	1.75708e+07	2.36858e+07	4.26296e+07	1.64461e+07	9.45134e+07	9.33335e+07	7.53244e+07	1.25729e+08	9.69307e+07	1.47802e+08	1.62819e+07	4.43423e+07	2.5235e+07	1.21873e+07	5.4539e+06	70029.3	2.20378e+07	2.65812e+07	3.2704e+07	2.87018e+07	3.48904e+07	66965	68105.8	69548.1	65875.3	64164.4	64646.4	64165.4
Daidzein@10.611-rp	452648	834250	282512	568341	682545	659233	394789	291383	380913	210502	157933	390736	807077	936525	1.16207e+06	826802	1.97946e+06	2.14525e+06	186790	186160	262173	24062.1	180864	26635	495056	588199	583206	475895	562503	25118.8	253576	193379	24980.6	258121	24019.6	561361
Hispidol@11.093-rp	861150	1.18199e+06	797350	1.34173e+06	1.18776e+06	947768	835030	554157	773846	420748	370904	532374	1.91775e+06	1.46568e+06	2.28724e+06	1.60381e+06	4.09535e+06	3.77117e+06	397313	503120	459533	93537.3	329480	32807.7	971585	1.16002e+06	1.18767e+06	999527	1.17231e+06	30508	336225	186754	61707.9	321905	71075.2	766803
Homovanillicacidsulfate@6.474-rp	36090.5	34920.2	35070.4	35093.3	36475.5	35746	281529	170674	199033	303563	542810	1.3151e+06	2.3032e+07	8.64589e+06	1.00172e+07	4.51413e+07	1.66911e+07	3.8509e+07	551434	1.8102e+06	620931	475787	613376	33790.7	4.69315e+06	5.06829e+06	4.78546e+06	4.90572e+06	4.89364e+06	34370.7	168976	368578	144027	76479.3	303780	189069
Thiaminealdehyde@7.015-rp	13842	13912.5	13938.5	13608.6	14291	13911.7	26170.1	13898	29948.2	37105	65899.3	31979.1	409633	344733	286000	531248	339890	624598	23629.3	83508.1	51846.6	33835.5	18693.8	14119.9	73298.8	84798.6	100666	94015.4	118899	14067.3	13626.2	14192	13754	14244.7	13787.5	14336.1
268.11599@1.741-rp	14770.7	17367.2	15782.6	17089.5	17558.1	16269.4	251779	310050	128969	196399	238934	120920	18408	47100.7	28646	53342.7	24828.5	15739.8	348661	459725	126637	621176	463385	12317.4	214468	206331	213896	188728	204052	11980.8	782388	841177	207747	153773	721247	416018
Genistein@11.746-rp	334515	530787	238420	400563	481630	502520	243615	178878	297256	129916	145916	183891	1.0266e+06	1.12933e+06	1.43274e+06	1.02438e+06	2.37887e+06	2.42238e+06	76329.8	97871.1	141976	29436.1	98855.1	32666.7	479483	534321	512112	490890	529236	28904.4	150766	140603	30759.6	141424	29668	351238
Apigenin@12.433-rp	467962	519444	384098	577726	565241	534702	378767	262782	402136	168766	214729	156374	1.14869e+06	1.01109e+06	1.66481e+06	1.29208e+06	3.26617e+06	3.2576e+06	130440	216774	204904	37433.9	165408	35564.9	709241	761418	704493	619265	787473	33724	131296	100455	34422.3	147126	57690.2	364927
283.99666@6.476-rp	37508.1	37672.7	36447.9	82651.5	60593.9	41413.8	37843.3	36850.7	45473.8	52760.8	78693.7	36162.1	720936	291173	339100	1.38171e+06	504704	1.25127e+06	38345.6	59198.8	37543.2	36172.3	90010.2	35118	165051	187855	113111	194820	208597	35720.7	53456.5	37516	61121.7	36662.1	37142	60109.8
4-Methylphenyl?-D-glucopyranosiduronicacid@6.763-rp	21937.6	23533.8	22805.6	22069.1	22340	22898.3	132420	43521.6	102359	114506	128230	210054	2.2943e+06	2.09565e+06	841495	2.13278e+06	963668	3.73956e+06	81744.9	223192	110826	139844	75322.3	22075	456606	482120	505981	435808	494756	23005.6	23474.8	50431.7	23143.2	22949.3	33201.6	87765.7
4-Hydroxy-5-[3-(sulfooxy)phenyl]pentanoicacid@9.652-rp	22950.9	22155.2	21155	22061.2	21663.3	23685.4	22956.9	23129.2	23005.4	22393.2	32392.7	30222.7	510688	592993	577680	353259	545390	526335	21608.1	21847.6	21572.2	21425.6	21503.1	21992.4	96172.3	116215	125892	132483	127297	22361.3	21402.9	22651.6	22507.1	21982.5	23089.3	33065
296.14702@4.975-rp	20971.1	21092.5	20979.3	21179.3	20100.2	20272.2	172105	202322	165970	193165	301534	104693	20693	20523.6	19988.7	30429.3	21863.1	21316.8	398316	432532	141364	806562	315288	21018	180750	172507	188496	150050	148506	20161	503319	799632	117115	102634	311904	316136
2-Phenylethylbeta-D-glucopyranosiduronicacid@8.719-rp	18861.2	19290.1	18762.6	19485.3	18669.6	19142.5	240756	74998.1	181581	764065	1.13251e+06	587029	19142.4	18813.9	18657	18778	18427	18917.8	115199	592067	477084	252409	55262.7	19046.2	157677	155715	142165	137138	177414	18049.6	20733.4	20064	19209.3	18609.7	19217.2	19470.6
318.11328@7.806-rp	114209	100697	100829	99598.9	106003	100898	335728	230499	1.03648e+06	579228	2.36601e+06	245113	5.65219e+06	5.23817e+06	7.22516e+06	1.22395e+07	2.96942e+06	8.22274e+06	1.16719e+06	2.42936e+06	1.76641e+06	912996	238883	102957	2.00246e+06	2.18199e+06	2.10318e+06	1.87798e+06	2.31343e+06	98543.1	107294	103154	108371	101601	97878.3	98693
318.11337@8.093-rp	108948	109021	101338	99684.8	115124	105521	515639	159514	445081	339788	1.30247e+06	195739	5.16647e+06	4.63118e+06	3.19762e+06	5.88551e+06	4.09514e+06	6.54188e+06	699594	1.64399e+06	1.12337e+06	789619	115153	99362.1	1.24914e+06	1.27734e+06	1.40469e+06	1.24429e+06	1.31745e+06	90468.3	104973	100014	100144	104141	93868.1	100762
3,7-Dihydroxy-2-(3-hydroxyphenyl)-5-chromanesulfinicacid@11.38-rp	27402.8	28701.9	27770.8	27866.1	28557.3	28185.2	1.67955e+07	1.10072e+07	1.89527e+07	1.21891e+07	1.78351e+07	2.23761e+07	27434	28985.1	28323.3	28488.9	27992	28024	1.8202e+07	1.92694e+07	1.15847e+07	2.2801e+07	1.9473e+07	28589.1	9.66589e+06	1.00062e+07	9.8664e+06	8.94571e+06	9.83449e+06	27589.7	1.87309e+07	1.85117e+07	1.36254e+07	1.59624e+07	1.64237e+07	1.91674e+07
326.15507@14.778-rp	39971.9	49806.1	50703.2	62654.2	50706.7	53693.7	160052	101209	219189	216341	390149	109060	648854	984928	1.40168e+06	2.46368e+06	1.4888e+06	1.95751e+06	110579	691316	204458	125309	98051.4	59068.6	209397	225845	322210	380077	417707	67819	52637.6	65533	56989.3	40455.8	119213	64928.2
328.06522@9.689-rp	19231.5	19472.8	18298.2	18931.8	20474.8	20174.2	67385.1	22802.4	71341.7	121964	185924	64698.6	610357	599218	472656	885090	667700	857843	90293.6	260100	109000	69198.5	31904.3	22124.2	126893	197431	171407	206536	229966	18009.7	19400.6	19118.6	19001.3	18068.7	18075.9	18882.4
4'-Hydroxy-5,6,7-trimethoxyflavanone@10.056-rp	46461.6	46061.1	41928.7	47332.5	33586.9	53283.3	1.2458e+06	600789	616277	1.01413e+06	1.07526e+06	1.04823e+06	39666.3	48712.9	53822.8	32064.8	49557.2	38981.7	887388	1.34709e+06	756825	1.12888e+06	1.66942e+06	15155.8	528606	478788	529753	533522	550531	15858.6	737906	1.05383e+06	499054	588714	651209	788896
3-(7-Hydroxy-4-oxo-4H-chromen-2-yl)phenylhydrogensulfate@10.609-rp	2.69834e+06	4.09972e+06	1.70314e+06	3.02407e+06	4.01695e+06	3.39776e+06	2.39133e+06	1.65235e+06	2.38475e+06	1.12889e+06	1.08714e+06	2.09993e+06	4.74867e+06	5.47156e+06	6.12379e+06	4.24688e+06	1.11812e+07	1.08813e+07	1.3955e+06	1.27793e+06	1.47116e+06	214512	1.17314e+06	27138.7	2.8604e+06	3.3958e+06	3.25417e+06	2.95606e+06	3.17806e+06	25262.1	1.37788e+06	1.0245e+06	164739	1.25404e+06	168240	3.41369e+06
336.06695@13.76-rp	29632.8	27649	29362.6	26930.6	28864.6	27409.4	1.15784e+06	1.01521e+06	2.01758e+06	1.49585e+06	1.43788e+06	1.80961e+06	28336.6	28484.3	28169.6	29479.4	27454.5	26487.5	1.53453e+06	1.74862e+06	839130	1.8386e+06	1.20905e+06	28419.1	732460	795240	850891	756422	792093	27781.6	1.00537e+06	2.17483e+06	1.32763e+06	1.66863e+06	1.21711e+06	1.42841e+06
344.03759@9.687-rp	17955.9	18181.3	17084.5	17676.1	19116.8	16635.7	92621.2	26166.8	71742	71840.4	174213	65591.1	718516	667424	388509	925388	691918	962190	86004.7	245173	133563	63862.6	17948.4	20656.8	135368	167407	164245	191937	216908	16815.2	18113.8	17850.6	17741	16870.2	16877	17630
5-Hydroxy-2-(4-hydroxyphenyl)-4-oxo-4H-chromen-7-ylhydrogensulfate@11.746-rp	2.35242e+06	3.42514e+06	1.60537e+06	2.63671e+06	3.68263e+06	3.87056e+06	1.74182e+06	1.35017e+06	2.5568e+06	721893	926515	1.23249e+06	7.28501e+06	7.89312e+06	1.06251e+07	7.70542e+06	1.76065e+07	1.58606e+07	781403	894315	990578	31515.7	834224	33677.2	3.76836e+06	4.00319e+06	4.04818e+06	3.89276e+06	3.51507e+06	55060.1	1.19254e+06	1.02184e+06	65648.4	864648	32077.4	2.69027e+06
Dihydronaringenin-O-sulphate@11.8-rp	26240.5	24636.6	25910.9	27139.1	26913	26460.5	883180	464342	847614	921507	1.09185e+06	683013	25437.6	26629.9	26528.2	26397.5	25156.2	24951.6	981328	961159	1.75322e+06	668026	416265	25959.5	320744	328944	287275	285101	293119	24544.8	102414	53576.6	60600.2	325070	61491	146900
5,5',6,6'-Tetramethyl-3,3'-di-tert-butyl-1,1'-biphenyl-2,2'-diol@13.332-rp	1.52258e+06	3.29281e+06	995556	1.91937e+06	6.83599e+06	6.37092e+06	5.37835e+06	2.06206e+06	2.93296e+06	6.18696e+06	1.74149e+07	5.49143e+06	40053.1	36320	48523	71909.1	118832	38121.7	834018	683862	650281	1.93049e+06	1.46089e+06	30462.1	2.74396e+06	2.39866e+06	2.73858e+06	2.42975e+06	2.54305e+06	32817.2	3.14487e+06	5.07972e+06	815789	2.73143e+06	698019	3.0796e+06
1-[1-ethyl-6-methyl-4-(4-phenyl-1-piperazinyl)-2-sulfanylidene-5-pyrimidinyl]ethanone@12.193-rp	27289.9	31850.4	25234.1	31949.7	30000.9	29195.1	50862.1	50042.3	76905.7	62709.1	180587	29612.2	589390	874929	472354	1.05056e+06	678384	1.38992e+06	85081.8	237176	81594.6	55633.9	26854.2	23690.2	232313	210131	185080	185375	160428	23094	32049.7	25636.5	27010.3	37281.5	27441.1	26426.2
Ethyldocosahexaenoate@16.212-rp	386290	472127	36897	66844.4	1.24297e+06	759243	7.87212e+06	1.66521e+06	1.54014e+06	2.80488e+06	4.48148e+06	4.03698e+06	29675.5	177127	129246	35584.6	163353	47925.9	1.68798e+06	733626	663550	1.55987e+06	1.75062e+06	20599.7	1.64254e+06	1.57468e+06	1.65333e+06	1.30307e+06	1.34595e+06	24316.2	4.42537e+06	2.78779e+06	604611	3.03711e+06	1.35017e+06	5.16105e+06
360.19707@14.721-rp	36356.9	33346	37129.1	34878.8	35034.2	33068.9	678929	727384	824636	1.05448e+06	911441	978486	34615.8	34398.1	37081	34090.6	31608.5	33811.9	580465	797787	577745	588383	638821	34297.5	429889	473148	418560	435409	367874	34954.1	1.00359e+06	788519	450659	752947	945568	947731
8-Hydroxy-3-[(6E)-6-pentadecen-1-yl]-3,4-dihydro-1H-isochromen-1-one@14.312-rp	725930	3.43093e+06	851626	2.54419e+06	1.85494e+07	8.6506e+06	8.42636e+06	3.42652e+06	7.53596e+06	9.96758e+06	2.68116e+07	1.1427e+07	54889.6	344467	284463	406339	469686	305726	4.96059e+06	3.62415e+06	4.57035e+06	1.08806e+07	2.12555e+06	35821.8	5.88221e+06	6.25844e+06	5.67573e+06	5.8188e+06	6.1626e+06	35956	7.16503e+06	1.5291e+07	2.81474e+06	1.00516e+07	1.20861e+06	1.25138e+07
Cervonoylethanolamide@13.336-rp	3.97491e+06	8.90552e+06	2.72554e+06	5.21179e+06	1.87272e+07	1.71359e+07	1.56793e+07	5.69327e+06	8.06215e+06	1.69276e+07	4.6161e+07	1.50925e+07	41875	37088.7	37018.4	36201.3	36147.6	39855.8	2.39543e+06	2.07571e+06	1.81075e+06	5.54547e+06	3.98802e+06	31847.8	7.31865e+06	6.90849e+06	7.71863e+06	6.5138e+06	7.31851e+06	34310	8.7806e+06	1.45649e+07	2.29186e+06	7.67038e+06	2.08948e+06	8.69128e+06
(17beta)-17-(Tetrahydro-2H-pyran-2-yloxy)androst-4-en-3-one@12.246-rp	220404	219486	106691	194208	411529	343655	319081	163925	150861	355417	644367	313154	15841.6	16559.9	14778.8	15205.6	14558.9	15143.4	56249.5	45637	72588.3	200488	196106	15619.4	170857	155051	175873	141662	158934	16045.4	327122	314621	115635	203688	94468.8	155313
Bis(2-ethylhexyl)phthalate@13.542-rp	19530.4	56911.4	19573.4	31113.8	313860	142085	1.01776e+06	321632	885002	1.32855e+06	3.75675e+06	1.2905e+06	20892.4	18639.7	19319.2	18629.2	18157.4	19081.3	76221.4	91654.3	131544	225861	89041.7	17384.6	473937	476334	448243	465576	497720	16217.5	571525	1.43239e+06	372681	1.00432e+06	84684.2	990311
Deoxycholicacid@16.205-rp	330968	946203	513721	261058	2.65171e+06	1.87189e+06	1.3599e+07	3.39113e+06	3.4217e+06	5.60588e+06	1.03231e+07	7.73794e+06	113977	566203	300220	347417	206800	147671	3.65439e+06	1.66725e+06	1.46477e+06	4.09178e+06	3.81377e+06	40859.6	2.75645e+06	2.76715e+06	2.75474e+06	3.58128e+06	2.71727e+06	35929.2	6.45464e+06	6.05157e+06	1.26392e+06	6.00135e+06	2.73399e+06	9.66351e+06
392.29289@15.474-rp	23266.7	22607.7	20815.2	57933.8	73609.5	41165.9	1.16876e+06	79323.3	244498	455825	1.0491e+06	519245	19083.2	22301.6	22940.1	21882.2	24844	22229.5	190379	131152	37436.4	345893	391194	29025.5	267243	286285	303378	289954	310112	19067	775365	948252	145399	912498	312086	940645
403.05057@9.689-rp	17498.6	17718.2	16649.4	17225.9	18629.9	18356.4	79331.5	40791.3	74256.6	97832.8	250568	48407.3	678301	638768	539951	1.11036e+06	870938	1.17532e+06	69866.5	309270	132243	74374.5	17491.2	20130.6	124774	185424	199573	230800	238170	16386.9	17652.5	17395.9	17289.1	16440.6	16313.2	17180.9
Ardisianone@13.622-rp	18249.1	18372.7	18125.8	18178.4	18697	18217.7	291326	83705.1	198817	300635	815472	395795	20742.5	18976	18345.8	17639.2	17710.4	18436.3	309837	196477	265829	384841	155674	17862.2	114661	96805.4	138142	115848	127497	16039	118551	283089	56261.4	70285.7	17947.2	105917
7a,12a-dihydroxy-3-oxo-5b-cholan-24-oicacid@13.541-rp	66202.3	178605	58913.3	151189	1.42026e+06	473996	3.95738e+06	1.29012e+06	3.19886e+06	5.14774e+06	1.32813e+07	4.71191e+06	17795.3	19819.5	23240.7	19518.4	17770.9	17615.2	471644	453101	474394	959384	303555	18172.8	1.80938e+06	1.67208e+06	1.76915e+06	1.70225e+06	1.70784e+06	17400.8	2.44329e+06	4.52064e+06	1.54087e+06	3.50935e+06	347055	3.85302e+06
Alpha-muricholate@13.336-rp	7.63616e+06	1.63132e+07	5.87986e+06	9.66585e+06	3.73386e+07	2.98244e+07	3.16621e+07	1.26292e+07	1.51772e+07	3.05694e+07	8.91175e+07	2.88055e+07	109574	382213	391810	605546	549870	261633	5.09266e+06	4.38784e+06	3.95295e+06	1.04385e+07	8.38439e+06	64374.2	1.31955e+07	1.38523e+07	1.62988e+07	1.30398e+07	1.41794e+07	60974.1	1.79385e+07	2.98706e+07	4.16729e+06	1.63978e+07	4.24904e+06	1.63495e+07
Cholicacid@14.313-rp	1.09544e+06	4.59274e+06	1.34453e+06	3.31148e+06	2.44231e+07	1.00344e+07	1.1619e+07	3.83086e+06	1.13245e+07	1.08086e+07	32189997	1.37253e+07	130820	439890	376011	613218	619251	400503	6.56689e+06	4.39462e+06	6.47142e+06	1.23573e+07	2.7798e+06	38706.4	7.87728e+06	8.5006e+06	7.76631e+06	7.46582e+06	7.87727e+06	38768.4	9.33277e+06	2.27341e+07	3.54652e+06	1.21691e+07	1.7413e+06	1.60741e+07
418.12637@9.838-rp	165926	222948	162681	212351	171143	221918	1.59839e+06	762530	2.01042e+06	863742	2.44298e+06	2.25364e+06	165256	160722	183724	142591	176764	160233	1.82496e+06	1.56048e+06	1.19094e+06	2.33731e+06	1.3452e+06	16805.6	672843	698813	780405	732532	739340	16630	1.01864e+06	1.22991e+06	484903	991946	925620	1.183e+06
425.31362@14.311-rp	314526	1.39236e+06	394037	1.02265e+06	7.91568e+06	3.39677e+06	3.58489e+06	1.45521e+06	3.20651e+06	4.28044e+06	1.15893e+07	4.959e+06	29253	120944	116013	208526	182804	129196	2.23527e+06	1.5243e+06	1.81181e+06	4.55551e+06	828702	17749	2.31221e+06	2.39247e+06	2.3117e+06	2.39567e+06	2.66245e+06	17815.5	3.22993e+06	6.50604e+06	1.26999e+06	4.21808e+06	459476	5.48134e+06
Daidzein-7-O-glucuronide@8.408-rp	442916	805967	214971	449085	459121	492903	578153	340488	638091	370842	251087	506558	1.19299e+06	1.28046e+06	1.62374e+06	839712	2.54397e+06	1.82426e+06	290915	273571	338517	42197	240815	33807.3	663345	636813	651374	678607	621352	31667.8	292757	153261	33860.4	197947	40715.8	643614
430.26882@14.313-rp	28341.1	152512	55286.1	125277	726198	305122	333646	124196	312255	361337	1.01406e+06	463132	19555.8	20744.8	35141.1	18745.2	18863	19807.3	193892	131150	163869	441981	94549.3	17499	218665	236219	247976	234909	260196	17564.5	290220	607323	162785	388312	43540.2	496970
Prunin@10.41-rp	16537.9	16709.4	17253.7	17099.3	16644.6	16538.4	288654	67342.8	607843	340801	693048	298983	17555.6	16847.1	17243.9	16691.2	16368.6	16534.6	433554	646697	1.14797e+06	284981	126560	17254.6	178509	173346	180526	152190	166581	16394.9	51573.8	19300.9	16846.5	162451	37351.5	91215.3
Baicalin@9.341-rp	562430	1.09314e+06	251316	782612	687151	800352	764170	565440	927963	434073	496180	610801	2.68265e+06	2.91099e+06	4.02139e+06	1.7254e+06	6.58294e+06	4.73626e+06	307225	380899	551281	52747.2	366937	38661.9	1.27545e+06	1.30205e+06	1.4211e+06	1.30141e+06	1.41096e+06	36752.3	409687	263112	48592.7	307725	37662.9	775846
Quercitrin@9.211-rp	16406.3	16653	16770.9	16927.5	16618.7	16495.2	499597	419905	543011	164212	686349	639171	16211.9	16620.6	17017.9	17539.4	16883.8	16084.6	379788	510713	198771	431972	593661	16811.2	216955	205609	219284	195013	205230	16351.5	225318	334551	143049	86869.9	108943	226335
452.31379@16.101-rp	276079	264755	164931	171361	1.02478e+06	644821	676028	301478	502593	429781	1.44578e+06	748105	20922.4	134143	25642.8	71450.9	114365	33254.8	235157	270990	193663	472966	160461	22651.5	309198	362943	295507	396752	345462	19051.4	337969	682396	29772.9	364442	105945	555876
Spirostan-3-ylacetate@16.827-rp	19945.2	23893.7	22043.7	20194.7	22909.7	18925.7	564190	309662	326591	681739	988872	615196	22177.2	23298.1	25405	20257.3	19412.8	19319.1	749251	524747	497092	1.31042e+06	640446	20135.2	386886	368801	305726	347806	353427	20126.1	693287	687917	353876	825414	373798	1.04917e+06
(1R)-1'-(cyclohexylmethyl)-1-(hydroxymethyl)-7-methoxy-9-methyl-N-propyl-2-spiro[1,3-dihydropyrido[3,4-b]indole-4,3'-azetidine]carboxamide@13.472-rp	2.99001e+06	6.19535e+06	2.22088e+06	3.73025e+06	9.33917e+06	1.11586e+07	1.15783e+07	4.68934e+06	5.84062e+06	1.14027e+07	3.27651e+07	1.06307e+07	45934.1	208263	214475	332214	502839	137108	1.82522e+06	1.50422e+06	1.36486e+06	3.7165e+06	3.09176e+06	18370.8	5.24903e+06	5.56607e+06	5.91043e+06	4.76947e+06	5.2029e+06	17597.7	6.80873e+06	1.12856e+07	1.40256e+06	5.74684e+06	1.53438e+06	5.76128e+06
474.29591@16.214-rp	30227.2	32109.5	20621.8	21810.7	21431.5	109866	893517	181919	220630	375414	606155	463394	24134	22231.9	22767.9	21194.6	26221.4	23602.6	165456	81220.2	68756	214416	232787	21755.3	176781	187422	225639	178702	188004	19130.2	391257	368840	79920.9	355429	158292	602624
490.29048@14.311-rp	64222.6	246902	47971.7	202299	1.42238e+06	669341	616331	216032	576554	630470	1.79739e+06	838009	17325.9	19265.7	27241.2	21950.5	32104.9	29024.3	344500	224104	312323	745221	130305	18283.1	412444	429943	458498	412782	468113	18312.4	507646	1.30735e+06	159473	674865	76767	923504
490.29051@13.334-rp	423501	970816	354907	579703	2.33754e+06	1.93414e+06	1.96724e+06	770554	950919	1.89688e+06	5.51815e+06	1.75208e+06	16964.5	17593.1	16764.5	19005.2	47340.5	16710.9	320670	249448	190478	656318	559703	16964.4	814421	850538	1.00245e+06	754850	829373	16068.4	1.12239e+06	1.66944e+06	239367	1.09117e+06	245059	1.08761e+06
506.26418@13.335-rp	127395	318098	106325	207161	806844	649380	681163	255418	311113	613884	1.89892e+06	564886	17503.9	18152.5	17297.6	17021.4	16395.7	17242.3	82887.8	61064.1	61597.6	203303	169411	17503.8	254564	296978	283442	250060	288251	16579.3	334936	590184	77452.7	320885	70756.8	343547
1-[(3R,9R,10S)-9-[(dimethylamino)methyl]-12-[(2R)-1-hydroxypropan-2-yl]-3,10-dimethyl-13-oxo-2,8-dioxa-12-azabicyclo[12.4.0]octadeca-1(14),15,17-trien-16-yl]-3-(4-methoxyphenyl)urea@12.243-rp	371660	369320	231097	443411	767529	652194	562866	299045	260920	583062	1.04615e+06	484331	15924.6	15503.4	15584.4	15384	15058.2	15190.5	115194	95210.5	133647	335268	364038	14629.5	265842	318852	304027	263179	343998	14140.7	592260	614531	226141	340025	188594	258802
100.00086@0.846-rp	2.52783e+06	4.0767e+06	3.5607e+06	3.00772e+06	3.30405e+06	3.34174e+06	4.22218e+06	3.18101e+06	2.72162e+06	3.60454e+06	2.98905e+06	2.92702e+06	3.53524e+06	2.53576e+06	2.36862e+06	1.72897e+06	3.48154e+06	2.72297e+06	2.48821e+06	3.23298e+06	2.67136e+06	2.65089e+06	3.20238e+06	242855	2.85406e+06	3.47289e+06	3.4945e+06	2.91701e+06	3.33601e+06	183856	3.1725e+06	4.10927e+06	3.94813e+06	4.73786e+06	2.93807e+06	3.7511e+06
Succinicanhydride@1.56-rp	477779	699197	329574	459742	587125	636701	474709	261850	378091	347315	387058	436644	376591	421524	362392	385385	424910	438881	296973	433051	473821	402203	538929	124481	409280	424670	433325	375034	426005	117493	408008	479490	408002	550202	424418	432097
2-methyl-3-oxopropanoicacid@1.4-rp	6.79132e+06	7.50043e+06	7.11524e+06	6.72025e+06	8.01533e+06	9.36227e+06	5.77527e+06	6.61448e+06	7.92847e+06	6.5148e+06	6.83227e+06	6.72304e+06	5.24386e+06	6.26591e+06	6.5943e+06	5.49965e+06	5.90735e+06	5.2249e+06	6.5845e+06	7.65394e+06	6.80548e+06	6.75846e+06	7.56143e+06	207976	6.09746e+06	7.24468e+06	7.08261e+06	6.55763e+06	6.89378e+06	189256	8.74248e+06	7.58681e+06	5.90643e+06	7.94443e+06	7.03321e+06	8.33964e+06
2-methyl-3-oxopropanoicacid@0.988-rp	1.33511e+06	2.21748e+06	2.3211e+06	2.1138e+06	2.48011e+06	1.89071e+06	2.14168e+06	1.68952e+06	2.5224e+06	2.30869e+06	2.05217e+06	2.23142e+06	1.97605e+06	2.10595e+06	1.99267e+06	2.25404e+06	2.38143e+06	2.25441e+06	2.29986e+06	2.63972e+06	1.85381e+06	2.40384e+06	2.32873e+06	302878	2.03142e+06	2.54397e+06	2.03573e+06	1.99014e+06	2.59584e+06	70038.2	1.87354e+06	2.35769e+06	1.8011e+06	2.78033e+06	2.1687e+06	2.71443e+06
Phenylacetylene@1.895-rp	5.09735e+07	7.93314e+07	4.91139e+07	6.17619e+07	6.24188e+07	6.115e+07	58494368	6.58203e+07	6.47733e+07	5.37496e+07	5.69354e+07	6.86032e+07	5.02863e+07	6.07781e+07	5.21139e+07	5.14484e+07	6.51482e+07	6.07863e+07	5.3255e+07	6.78109e+07	6.42243e+07	4.83199e+07	5.78492e+07	225361	5.64426e+07	6.00245e+07	5.94532e+07	5.12513e+07	5.61734e+07	131079	5.79644e+07	6.07888e+07	4.14104e+07	5.66551e+07	4.25472e+07	5.71857e+07
Thiomorpholine@1.216-rp	1.41862e+06	2.1643e+06	1.51936e+06	1.51952e+06	1.5895e+06	1.49975e+06	1.92039e+06	2.39601e+06	1.86509e+06	1.90759e+06	1.81568e+06	2.51959e+06	1.37557e+06	1.57269e+06	1.53768e+06	1.57785e+06	1.9064e+06	2.12068e+06	1.7661e+06	2.03371e+06	1.73884e+06	1.67914e+06	1.54358e+06	19478.1	1.64325e+06	1.64033e+06	1.60811e+06	1.50619e+06	1.78342e+06	18278.2	1.37821e+06	1.51254e+06	980842	1.54415e+06	1.13494e+06	1.69777e+06
Choline@0.99-rp	1.7449e+07	2.31705e+07	1.32891e+07	1.67495e+07	1.90349e+07	1.8728e+07	1.59708e+07	1.38527e+07	1.39201e+07	1.40369e+07	1.41739e+07	1.85089e+07	1.47105e+07	1.29351e+07	1.17343e+07	1.20836e+07	1.21442e+07	1.56972e+07	8.92856e+06	1.24068e+07	1.17565e+07	1.02108e+07	1.1361e+07	50174.6	1.38429e+07	1.44929e+07	1.50444e+07	1.47643e+07	1.43711e+07	89742.5	1.58871e+07	1.47085e+07	1.52576e+07	1.77099e+07	1.65405e+07	1.82802e+07
103.98489@0.929-rp	2.7435e+08	3.09633e+08	2.96217e+08	332883489	3.14039e+08	3.10127e+08	343222532	3.13097e+08	3.11462e+08	3.18995e+08	2.96706e+08	3.06002e+08	2.91468e+08	3.09434e+08	3.04669e+08	2.97139e+08	3.13118e+08	2.96649e+08	2.88288e+08	3.15591e+08	2.90824e+08	2.89016e+08	2.8952e+08	2.16136e+06	273412698	3.17263e+08	3.1627e+08	2.57781e+08	3.0485e+08	3.70792e+06	3.20318e+08	3.09972e+08	2.79152e+08	2.84008e+08	2.91295e+08	2.79262e+08
104.02607@5.98-rp	98745.4	33673.1	91771.2	121105	110389	93682.3	156826	115574	100581	148592	68472.8	95652	44740.9	116944	98310.9	107305	72205.2	91957.9	68146.4	82096.4	91665	150088	65076.4	80619.7	341837	350028	386995	339278	449909	66236.3	2.28268e+06	2.26759e+06	1.59621e+06	1.17743e+06	1.85459e+06	2.08245e+06
2-hydroxybutyricacid@1.555-rp	7.43488e+06	1.25711e+07	2.19448e+07	9.06334e+06	1.48602e+07	1.31204e+07	1.11866e+07	5.89792e+06	1.19166e+07	9.34063e+06	1.04908e+07	8.81421e+06	1.05806e+07	1.47381e+07	1.3896e+07	1.36394e+07	1.11345e+07	1.21893e+07	1.27671e+07	1.19478e+07	7.3195e+06	1.33586e+07	1.67121e+07	218784	1.35365e+07	1.42125e+07	1.45928e+07	1.38635e+07	1.44834e+07	78135.6	1.80439e+07	1.98736e+07	2.18583e+07	2.68548e+07	1.97442e+07	1.45617e+07
1,3-Dimethoxypropane@8.939-rp	521305	692791	557410	773297	612464	788924	508674	822206	643851	763640	479789	589889	535532	628418	814525	565472	609999	506845	691810	572730	616330	597721	558621	17329.1	606282	612701	640424	569454	632203	16489.7	743494	555656	521784	629489	691851	559674
Serine@0.992-rp	1.45383e+08	1.44185e+08	1.16238e+08	124050333	1.16149e+08	1.15446e+08	1.24915e+08	1.59445e+08	1.37656e+08	1.38921e+08	1.20137e+08	1.79213e+08	1.56158e+08	1.52224e+08	1.26628e+08	1.3881e+08	146479644	131669850	1.20292e+08	1.28438e+08	1.26522e+08	1.39346e+08	1.43985e+08	686300	133111624	1.34535e+08	1.41487e+08	1.30806e+08	136292728	719144	134848770	1.45591e+08	1.45169e+08	2.55624e+08	148374598	1.30024e+08
Glycericacid@1.102-rp	857884	1.28787e+06	611839	603223	1.30544e+06	924942	609618	555959	492417	742714	950575	505624	540584	537649	600466	445576	899570	674097	650820	1.09375e+06	885599	795693	860491	173851	999627	791792	771869	785937	954359	107408	1.38879e+06	720633	1.0514e+06	751810	537058	811041
3,4-Diaminopyridine@0.961-rp	2.12209e+06	3.79494e+06	1.80925e+06	2.90184e+06	2.80001e+06	2.24585e+06	2.62564e+06	4.00735e+06	2.7817e+06	2.54382e+06	1.54901e+06	3.84452e+06	2.77996e+06	2.51662e+06	2.80253e+06	2.80812e+06	3.66944e+06	3.32277e+06	2.54214e+06	2.68524e+06	2.8719e+06	2.88864e+06	2.93661e+06	115196	3.07288e+06	3.1003e+06	2.91897e+06	2.73047e+06	2.72304e+06	152071	2.49546e+06	3.40635e+06	2.29687e+06	2.98791e+06	2.41499e+06	2.38135e+06
Cytosine@1.417-rp	860650	894523	869010	769718	1.04348e+06	924464	1.09128e+06	1.26815e+06	802851	887787	804383	939877	796833	796196	827949	868448	1.12236e+06	739654	595119	787958	798654	826433	762440	55130.3	970169	968841	808393	732549	946511	35160.3	1.04159e+06	809629	789253	960127	1.09844e+06	979953
Cytosine@1.17-rp	424448	767757	424254	687276	576846	1.11091e+06	458506	651691	409993	657369	405002	596365	482021	385982	385983	509991	712131	592840	468115	368725	451554	289451	447956	90705.7	528646	508246	519767	456365	435899	66898.5	662637	464056	625762	851920	534183	479009
Cytosine@1.418-rp	2.11394e+06	1.70242e+06	2.22378e+06	1.50688e+06	2.21591e+06	1.65092e+06	2.28716e+06	2.37132e+06	2.01785e+06	1.79233e+06	1.78165e+06	1.86413e+06	1.97645e+06	2.17925e+06	1.79549e+06	1.62184e+06	2.45215e+06	1.71246e+06	1.56212e+06	1.87526e+06	1.46766e+06	1.83889e+06	1.77904e+06	74416.6	2.13519e+06	1.64217e+06	1.6106e+06	1.3917e+06	1.84836e+06	79303.7	2.11147e+06	1.99279e+06	1.70679e+06	1.85642e+06	2.263e+06	2.17167e+06
2-furoicacid@1.392-rp	2.34906e+06	3.0121e+06	2.70101e+06	2.35296e+06	3.11445e+06	3.22039e+06	3.01157e+06	2.03194e+06	2.52059e+06	2.14497e+06	2.81538e+06	2.17608e+06	1.97659e+06	1.76138e+06	1.90167e+06	2.10238e+06	2.40871e+06	2.41041e+06	2.40613e+06	2.76676e+06	2.54335e+06	2.65568e+06	2.61284e+06	199871	2.55647e+06	2.40595e+06	2.84804e+06	2.39198e+06	2.30762e+06	35946	2.86945e+06	2.40929e+06	2.22851e+06	3.16897e+06	2.3463e+06	2.87126e+06
Uracil@1.711-rp	1.38154e+06	2.33103e+06	983295	1.67987e+06	2.26611e+06	2.48625e+06	1.14977e+06	1.50403e+06	975779	1.51912e+06	1.57667e+06	1.38408e+06	1.71438e+06	918462	926581	673178	1.31985e+06	1.51887e+06	1.00146e+06	2.30793e+06	2.32899e+06	1.34852e+06	2.46249e+06	44054.4	1.55278e+06	1.55577e+06	1.57742e+06	1.40235e+06	1.5502e+06	49557.2	1.61428e+06	1.11164e+06	2.12684e+06	2.20775e+06	850187	1.53028e+06
3165@8.463-rp	615346	572870	551387	890937	538027	720831	424564	774691	533904	623934	420025	564550	428131	503593	555041	374534	520073	478724	565195	474132	568477	406186	497729	42638.9	527117	517852	602228	551670	526701	46621.4	743445	583491	530951	653130	700146	528435
1-pyrroline-2-carboxylicacid@1.627-rp	278614	287723	273128	180457	301884	282992	307503	294715	370812	264388	436325	269436	1.41705e+06	1.3013e+06	1.04203e+06	1.19616e+06	1.26696e+06	1.08201e+06	332182	508910	605061	406676	281580	192228	492290	521000	528085	422402	548822	124943	287917	265166	281006	217036	235058	232750
Creatinine@1.012-rp	5.91631e+06	5.89747e+06	5.77905e+06	5.26407e+06	6.27795e+06	6.42888e+06	4.78948e+06	4.40764e+06	5.37561e+06	4.491e+06	3.36273e+06	4.14123e+06	5.8769e+06	4.9805e+06	5.47406e+06	5.76397e+06	4.76194e+06	5.30468e+06	6.1186e+06	5.74559e+06	4.91431e+06	5.72841e+06	7.14782e+06	218194	5.26307e+06	5.69883e+06	4.92463e+06	5.44106e+06	5.26055e+06	92655.3	4.94852e+06	5.25895e+06	4.3549e+06	4.92645e+06	3.99204e+06	4.88511e+06
2-hydroxy-2,4-pentadienoate@8.938-rp	1.96318e+06	2.2748e+06	2.04905e+06	2.57073e+06	2.04935e+06	2.67766e+06	1.76754e+06	2.9667e+06	2.22271e+06	2.49638e+06	1.73189e+06	2.05523e+06	2.00145e+06	2.1602e+06	2.51804e+06	2.0131e+06	1.94606e+06	1.65743e+06	2.54187e+06	2.26693e+06	2.08713e+06	1.998e+06	1.95426e+06	106974	2.25997e+06	2.12249e+06	2.15712e+06	2.0411e+06	2.14163e+06	122116	2.5471e+06	1.96194e+06	1.7062e+06	2.24644e+06	2.25697e+06	1.90717e+06
2-hydroxy-2,4-pentadienoate@0.99-rp	936687	1.86796e+06	1.8225e+06	1.35001e+06	1.67098e+06	1.23746e+06	1.49198e+06	2.20112e+06	1.69261e+06	1.48611e+06	1.35636e+06	1.37885e+06	1.37455e+06	1.50202e+06	1.595e+06	1.55952e+06	1.16996e+06	1.54087e+06	2.0405e+06	1.44936e+06	1.23151e+06	1.45003e+06	2.00601e+06	24206.3	1.3707e+06	1.46384e+06	1.44581e+06	1.66759e+06	1.49874e+06	27723	1.5235e+06	1.57854e+06	1.31168e+06	1.47716e+06	938937	1.812e+06
1H-Inden-1-ylidene@3.063-rp	6.45276e+06	7.18033e+06	5.33197e+06	7.17693e+06	5.59303e+06	5.06664e+06	4.40157e+06	5.94029e+06	4.38104e+06	3.57275e+06	3.29597e+06	6.05993e+06	4.31651e+06	4.36874e+06	3.62349e+06	4.6861e+06	5.30667e+06	5.48143e+06	5.1015e+06	5.38336e+06	5.43909e+06	4.73507e+06	5.3416e+06	55278.9	4.94125e+06	5.09077e+06	5.00628e+06	4.52039e+06	4.89879e+06	40055.1	4.46519e+06	5.58894e+06	3.63351e+06	6.6282e+06	2.6436e+06	5.39882e+06
2-hydroxycyclohexan-1-one@3.713-rp	945459	1.11552e+06	1.14836e+06	1.20321e+06	1.20351e+06	1.2711e+06	840971	1.48163e+06	1.05826e+06	1.31678e+06	1066341	1.09237e+06	1.10796e+06	1.05793e+06	1.27627e+06	935883	1.09319e+06	967816	1.19696e+06	992264	1.02512e+06	933867	931851	54706.7	1.1092e+06	1.03882e+06	1.12783e+06	1.02947e+06	1.08911e+06	40361.4	1.36853e+06	1.01477e+06	869876	1.12537e+06	1.01824e+06	930671
1-Amino-2,4-imidazolidinedione@1.101-rp	706870	1.06264e+06	861355	797765	835456	946880	1.12766e+06	1.08266e+06	999920	1.10866e+06	1.14743e+06	1.37627e+06	749204	868767	780356	840119	995928	1.09243e+06	1.00206e+06	1.21543e+06	872521	1.10142e+06	1.07574e+06	63639.4	920488	918651	1.02606e+06	841283	901460	64297	861826	1.1885e+06	643873	1.13708e+06	821109	903088
Proline@1.07-rp	2.0842e+07	3.38006e+07	2.18017e+07	2.22835e+07	2.09623e+07	1.9285e+07	2.58532e+07	2.9157e+07	2.68077e+07	2.20756e+07	2.06766e+07	3.26105e+07	1.69285e+07	1.93442e+07	1.66348e+07	1.86467e+07	2.54129e+07	2.7054e+07	2.04966e+07	2.47979e+07	1.96988e+07	1.6487e+07	1.86684e+07	513295	2.08019e+07	2.11707e+07	2.22146e+07	1.91221e+07	2.11358e+07	284135	1.71614e+07	1.76725e+07	1.50991e+07	1.92202e+07	1.41544e+07	1.9985e+07
Fumaricacid@1.59-rp	852254	1.98843e+06	1.16974e+06	977571	1.48832e+06	1.70692e+06	1.50794e+06	479670	1.44708e+06	1.14135e+06	1.65803e+06	1.13371e+06	430943	883428	333786	433543	493592	673349	458113	830971	502102	469039	780518	36739	990921	787120	1.05974e+06	1.05812e+06	1.00887e+06	35060.2	1.10772e+06	1.82319e+06	606181	2.00796e+06	1.04167e+06	1.38859e+06
2-oxovalericacid@1.835-rp	4.95474e+06	7.23266e+06	9.1273e+06	5.71317e+06	7.55034e+06	9.03461e+06	8.00246e+06	4.94106e+06	8.62867e+06	7.07548e+06	7.48509e+06	5.48473e+06	7.28966e+06	9.27206e+06	8.28818e+06	8.56339e+06	7.437e+06	7.09196e+06	7.96508e+06	8.58344e+06	4.86683e+06	7.73723e+06	9.06513e+06	741796	7.60168e+06	7.32558e+06	7.13369e+06	6.58939e+06	7.34507e+06	633641	8.50845e+06	8.73217e+06	7.10925e+06	7.57904e+06	7.32526e+06	5.71018e+06
116.04981@3.054-rp	957813	1.02149e+06	789131	1.08417e+06	1.0441e+06	700329	659688	943709	701942	547887	516345	885793	677521	588184	508547	677899	878243	807670	772702	715031	757331	730068	711484	21136.6	637267	672677	839454	685658	688952	31756.4	857092	742635	494804	939327	404781	808365
Phenylacetonitrile@3.057-rp	2.4309e+07	2.85408e+07	1.96931e+07	2.56068e+07	2.15512e+07	1.96167e+07	1.69486e+07	2.32646e+07	1.68524e+07	1.44362e+07	1.28942e+07	2.36255e+07	1.73987e+07	1.66062e+07	1.49372e+07	1.80858e+07	2.16855e+07	2.1731e+07	1.95108e+07	2.09012e+07	2.01712e+07	1.84053e+07	1.99441e+07	105538	1.87763e+07	1.94145e+07	1.92766e+07	1.87979e+07	1.837e+07	111677	1.90821e+07	2.07858e+07	1.39493e+07	2.53412e+07	1.00978e+07	2.06503e+07
Phenylacetonitrile@1.899-rp	402190	551943	328876	456701	441189	506364	603788	587580	502029	406249	425974	524359	372860	463189	405128	386968	495749	451728	360145	457786	471665	372017	587545	57893.6	450844	429071	454400	388552	471115	40946.2	581799	472056	292799	438260	351502	449061
Phenylacetonitrile@10.937-rp	24704.8	18481.7	27653.5	26297.1	26842.8	23164.3	380575	558300	763572	511985	819714	656717	261776	337243	328199	285340	311759	290560	480102	723023	739112	404986	410611	16459.3	452284	407949	368669	435585	389392	15577.9	825934	904069	419490	563977	676539	1.00058e+06
4-methylaminobutyricacid@1.098-rp	1.38321e+08	181230716	1.12071e+08	1.54057e+08	1.54443e+08	1.49102e+08	1.15006e+08	1.55135e+08	1.34344e+08	1.23288e+08	1.41112e+08	1.5802e+08	1.04145e+08	1.03685e+08	1.04278e+08	1.03875e+08	1.17622e+08	1.18048e+08	1.13903e+08	1.23464e+08	1.11295e+08	9.98415e+07	1.03438e+08	967158	1.13336e+08	1.16433e+08	1.27453e+08	1.0909e+08	1.23712e+08	814857	8.49219e+07	1.01403e+08	8.80085e+07	9.11948e+07	9.0063e+07	1.07568e+08
1-Chloro-1,2,2-trifluoroethane@0.953-rp	4.97819e+07	5.18508e+07	4.03183e+07	4.2555e+07	5.65439e+07	4.98002e+07	5.52967e+07	4.98131e+07	5.22162e+07	5.26628e+07	4.70576e+07	5.3784e+07	5.32509e+07	4.74399e+07	5.21548e+07	4.94039e+07	4.94907e+07	4.17956e+07	4.35258e+07	5.19387e+07	4.64316e+07	4.78051e+07	5.07622e+07	70572.6	4.48833e+07	5.1687e+07	4.8052e+07	4.39073e+07	4.8052e+07	52115.6	4.84812e+07	4.74696e+07	3.74247e+07	4.89174e+07	4.89015e+07	5.39524e+07
118.0115@0.838-rp	7.38483e+06	1.12497e+07	1.03449e+07	8.73408e+06	9.65224e+06	9.96227e+06	1.12383e+07	8.90289e+06	8.30286e+06	1.02403e+07	8.43226e+06	9.55006e+06	9.23062e+06	7.56917e+06	6.97312e+06	6.3353e+06	9.16558e+06	7.95263e+06	7.15061e+06	9.53469e+06	8.00773e+06	7.89439e+06	9.27494e+06	797726	7.94552e+06	9.43331e+06	9.59929e+06	8.43891e+06	9.77794e+06	686193	9.28816e+06	1.22699e+07	1.09457e+07	1.28297e+07	8.7071e+06	1.04771e+07
Coumarone@1.446-rp	2.5663e+07	4.6447e+07	3.08465e+07	36234209	3.50753e+07	3.71296e+07	4.05641e+07	3.50817e+07	3.25962e+07	2.44502e+07	3.27522e+07	4.34737e+07	1.72416e+07	2.45791e+07	2.21498e+07	2.38546e+07	3.47063e+07	3.08409e+07	3.39714e+07	3.63105e+07	2.4933e+07	3.01989e+07	3.0958e+07	116146	3.02314e+07	3.01811e+07	3.14774e+07	2.51667e+07	3.28627e+07	120147	2.59872e+07	3.01336e+07	1.99616e+07	3.72175e+07	1.86518e+07	3.22349e+07
2-hydroxy-2-methylbutyricacid@2.166-rp	1.2653e+06	1.42582e+06	1.51942e+06	1.69781e+06	1.53377e+06	1.74695e+06	2.00297e+06	1.74271e+06	1.73229e+06	2.35359e+06	1.76159e+06	1.95073e+06	1.32531e+06	1.46486e+06	1.61192e+06	1.25481e+06	1.74071e+06	1.63164e+06	2.33038e+06	2.52176e+06	1.73791e+06	1.64167e+06	1.9135e+06	262229	1.72646e+06	1.73831e+06	1.91236e+06	1.96416e+06	2.11683e+06	141927	2.04683e+06	2.33459e+06	1.55221e+06	1.73666e+06	1.86991e+06	1.82994e+06
2-hydroxy-2-methylbutyricacid@2.524-rp	2.44947e+06	2.24082e+06	2.95405e+06	2.32777e+06	2.54283e+06	2.59719e+06	3.73399e+06	3.91477e+06	5.40383e+06	4.50922e+06	4.38262e+06	4.3556e+06	2.71179e+06	3.6542e+06	2.61979e+06	2.86509e+06	3.49347e+06	3.23876e+06	3.82344e+06	5.32686e+06	4.17031e+06	4.26624e+06	3.98329e+06	206876	3.18396e+06	3.47676e+06	3.44555e+06	3.532e+06	3.4618e+06	107338	3.09371e+06	3.49298e+06	2.30484e+06	3.01542e+06	2.70227e+06	3.04244e+06
2-methylserine@0.992-rp	1.93208e+07	2.67285e+07	1.89779e+07	2.10544e+07	1.95412e+07	1.85119e+07	1.90841e+07	2.0959e+07	1.87677e+07	1.56674e+07	1.76088e+07	2.47696e+07	1.64759e+07	1.66032e+07	1.67396e+07	1.879e+07	2.07156e+07	2.12523e+07	1.7877e+07	2.41018e+07	1.66841e+07	1.7771e+07	1.82972e+07	828918	1.76629e+07	1.81417e+07	1.90836e+07	1.76213e+07	1.77936e+07	500760	1.44217e+07	1.98898e+07	1.40306e+07	1.68628e+07	1.34379e+07	1.70567e+07
119.95877@0.935-rp	7.48291e+06	1.57827e+07	8.59677e+06	9.92813e+06	1.177e+07	1.10363e+07	9.51418e+06	9.3919e+06	9.37966e+06	9.44353e+06	9.25984e+06	1.20879e+07	7.86218e+06	9.50114e+06	8.96253e+06	8.45453e+06	9.18811e+06	1.21337e+07	1.05987e+07	1.59394e+07	1.10063e+07	9.73384e+06	1.07496e+07	201461	9.09988e+06	1.13959e+07	1.23008e+07	8.21479e+06	1.06619e+07	402167	9.03042e+06	8.45213e+06	8.82779e+06	1.03921e+07	7.5095e+06	1.11832e+07
2-hydroxynicotinonitrile@1.724-rp	70430.9	271253	179900	89344.3	122874	125624	168312	173492	148485	166709	176165	95358.7	128391	102660	115517	77250.2	224273	183593	84810	155443	156682	222044	173229	124978	457093	435779	479108	460891	495948	154352	108704	377023	169457	199261	120112	151532
Erythrose@1.177-rp	3.20769e+06	3.05257e+06	3.47088e+06	2.3752e+06	3.20826e+06	3.49768e+06	2.39697e+06	3.07679e+06	2.49707e+06	2.67887e+06	2.42664e+06	3.14945e+06	2.5769e+06	2.47272e+06	2.34034e+06	2.38626e+06	2.79603e+06	2.31195e+06	2.45739e+06	2.35591e+06	2.32472e+06	2.81509e+06	2.44211e+06	86781.7	2.56871e+06	2.66693e+06	2.46808e+06	2.70944e+06	2.78401e+06	33811.6	1.98207e+06	2.38005e+06	1.98259e+06	2.26288e+06	2.23807e+06	2.08912e+06
4-hydroxystyrene@1.45-rp	664773	1.20133e+06	779234	841749	797010	1.02924e+06	953969	881527	917617	578795	781820	1.21906e+06	458680	638480	615758	556147	856566	818638	1.07861e+06	1.03494e+06	632678	783928	792718	10772.9	803843	764352	687869	687658	721544	10923.2	695913	753875	469911	833253	435967	916675
4-hydroxystyrene@8.169-rp	108993	81500.3	77192.6	48642.2	84689.1	84486.1	4.1168e+06	3.32647e+06	4.16777e+06	2.56417e+06	6.05723e+06	6.91538e+06	1.20505e+06	1.99414e+06	2.3088e+06	96116.7	1.95644e+06	125600	5.08293e+06	4.12249e+06	4.30766e+06	3.86693e+06	3.41954e+06	65719.8	2.19964e+06	2.5152e+06	2.2915e+06	2.2106e+06	2.28064e+06	58641.2	1.60622e+06	2.23031e+06	710927	1.78496e+06	955171	1.69709e+06
4-hydroxystyrene@8.723-rp	226925	523352	234831	383818	337033	268200	346951	394007	285759	307655	394098	501861	272338	227471	302418	219235	367209	374855	364385	449526	355684	185418	322574	15445.8	323704	323268	301370	291478	290271	14637.6	282814	305102	75142.7	149122	102731	490698
(Nitroimino)dimethanol@0.837-rp	715663	1.32015e+06	1.21978e+06	938824	1.10421e+06	1.14319e+06	1.34017e+06	988871	995881	1.14132e+06	966987	1.07684e+06	1.04226e+06	900309	743865	644208	840040	904270	743841	1.12881e+06	1.01329e+06	875122	942027	78419	815840	1.07815e+06	1.20886e+06	880147	1.04037e+06	74908.2	961304	1.3441e+06	1.16838e+06	1.32089e+06	925162	1.05815e+06
2-hydroxybenzaldehyde@1.448-rp	5.4071e+06	1.0063e+07	6.27573e+06	7.41618e+06	6.92698e+06	7.69734e+06	8.29761e+06	7.46136e+06	7.3482e+06	5.27285e+06	6.77821e+06	9.31278e+06	3.47441e+06	5.14081e+06	4.65754e+06	4.88258e+06	7.1872e+06	6.59734e+06	7.148e+06	7.60819e+06	5.55524e+06	6.31135e+06	6.23294e+06	460189	6.18205e+06	6.57765e+06	7.10815e+06	5.21486e+06	6.71436e+06	320616	5.38977e+06	6.88624e+06	4.2419e+06	7.61893e+06	3.85658e+06	6.62061e+06
Niacinamide@2.383-rp	9.98659e+06	1.56504e+07	1.00618e+07	8.59021e+06	9.51961e+06	1.38314e+07	9.19835e+06	1.30879e+07	1.01064e+07	1.17097e+07	1.00492e+07	1.01018e+08	1.0846e+07	9.395e+06	1.01261e+07	1.198e+07	1.8046e+07	9.15515e+06	8.37636e+06	1.0393e+07	7.57673e+06	1.07041e+07	1.42714e+07	59581.8	1.35039e+07	1.35958e+07	1.40619e+07	1.12301e+07	1.28485e+07	82183.4	9.52237e+06	9.35794e+06	1.08388e+07	1.08231e+07	1.45413e+07	9.51221e+06
1-phenylethanol@8.113-rp	3.75885e+06	4.42674e+06	3.49907e+06	5.21173e+06	4.69112e+06	5.10286e+06	3.88853e+06	5.94859e+06	4.75093e+06	4.54159e+06	3.34959e+06	3.89933e+06	4.16265e+06	4.24372e+06	4.92243e+06	4.05398e+06	4.67287e+06	3.02474e+06	4.21379e+06	3.69724e+06	4.33784e+06	4.20885e+06	4.06525e+06	529683	3.75695e+06	4.4603e+06	4.70883e+06	3.9937e+06	3.74809e+06	551225	5.38745e+06	3.83305e+06	3.15642e+06	4.09142e+06	4.19764e+06	3.51208e+06
1-phenylethanol@7.557-rp	3.48983e+06	5.79513e+06	3.81536e+06	6.48258e+06	4.42922e+06	5.67206e+06	5.86116e+06	7.54477e+06	4.51108e+06	6.1198e+06	4.19769e+06	6.34243e+06	5.94601e+06	5.73531e+06	4.7511e+06	3.53035e+06	6.39309e+06	5.21806e+06	5.81833e+06	5.46952e+06	5.28824e+06	4.77337e+06	4.50326e+06	449462	4.96491e+06	5.13449e+06	4.9841e+06	4.27158e+06	4.90321e+06	439444	4.52273e+06	3.35886e+06	3.44817e+06	4.62863e+06	3.00367e+06	3.89101e+06
1-phenylethanol@6.48-rp	2.53315e+06	2.25983e+06	2.71622e+06	2.47433e+06	2.71933e+06	3.09089e+06	1.34334e+06	2.99182e+06	2.54996e+06	2.5942e+06	2.28664e+06	1.87239e+06	1.76721e+06	2.11291e+06	3.619e+06	3.09754e+06	1.95153e+06	1.57329e+06	2.73399e+06	1.87907e+06	2.04681e+06	2.35375e+06	2.24745e+06	286051	2.61128e+06	2.7291e+06	2.73117e+06	2.74407e+06	2.4656e+06	268201	3.92525e+06	2.85391e+06	2.13214e+06	2.74291e+06	3.60038e+06	2.79603e+06
123.01692@0.847-rp	1.6795e+07	2.66153e+07	2.28194e+07	1.89209e+07	2.19865e+07	2.25601e+07	2.66544e+07	2.1782e+07	1.97688e+07	2.16681e+07	1.8565e+07	2.05326e+07	2.10385e+07	1.79467e+07	1.64702e+07	1.50386e+07	1.90747e+07	1.7315e+07	1.90343e+07	2.20955e+07	1.77246e+07	1.70742e+07	2.03118e+07	1.73341e+06	1.94007e+07	2.03216e+07	2.27767e+07	1.80937e+07	2.13329e+07	1.40085e+06	2.16551e+07	2.6019e+07	2.50086e+07	2.91702e+07	1.83455e+07	2.36936e+07
107089@10.789-rp	758209	817336	721790	1.04753e+06	820249	1.03586e+06	688567	1.10731e+06	888023	1.02692e+06	707063	848263	727831	755139	932496	690836	699673	687275	932561	857260	822331	748829	820249	33132	839644	856839	908256	772646	894002	15568.5	1.03104e+06	857164	649662	797348	841031	776166
124.01771@0.853-rp	1.60825e+06	2.54601e+06	2.25587e+06	1.79631e+06	1.84783e+06	2.09277e+06	2.57593e+06	2.16318e+06	1.86539e+06	2.00949e+06	1.68451e+06	1.95526e+06	1.94864e+06	1.74814e+06	1.42241e+06	1.42802e+06	1.85557e+06	1.962e+06	1.70396e+06	2.13906e+06	1.64738e+06	1.5381e+06	1.81826e+06	164189	1.77127e+06	1.94768e+06	2.18028e+06	1.61217e+06	2.11987e+06	115122	2.00642e+06	2.49116e+06	2.40758e+06	2.73704e+06	1.71972e+06	2.22596e+06
124.01858@0.849-rp	1.91282e+06	2.86811e+06	2.86271e+06	2.01902e+06	2.85119e+06	2.39244e+06	3.01798e+06	2.6105e+06	2.11363e+06	2.80135e+06	1.50043e+06	2.17176e+06	2.32581e+06	1.95436e+06	1.76273e+06	1.50204e+06	2.0062e+06	1.96351e+06	1.85465e+06	2.5472e+06	1.55857e+06	1.58939e+06	2.11819e+06	181657	2.19105e+06	2.58623e+06	2.40618e+06	1.87065e+06	2.51241e+06	161550	2.68989e+06	2.85866e+06	2.59008e+06	3.5011e+06	1.96547e+06	2.73245e+06
GV9100000@9.844-rp	45087522	4.67572e+07	4.27172e+07	5.93677e+07	4.58781e+07	5.71276e+07	3.96449e+07	5.88325e+07	4.54217e+07	5.65181e+07	3.72723e+07	4.45641e+07	3.88983e+07	4.35256e+07	4.79813e+07	3.63669e+07	4.66601e+07	4.18358e+07	4.17735e+07	4.08814e+07	4.28528e+07	4.00318e+07	3.87723e+07	817874	4.47566e+07	4.11311e+07	4.91536e+07	4.27078e+07	4.9277e+07	554980	5.85004e+07	4.33916e+07	3.98864e+07	5.1836e+07	4.79963e+07	4.31628e+07
Taurine@1.009-rp	1.26981e+08	1.67634e+08	8.76482e+07	145558644	1.58242e+08	1.38847e+08	1.16692e+08	9.66168e+07	7.48724e+07	124178367	1.19587e+08	140601992	1.05902e+08	8.90861e+07	8.16957e+07	8.65346e+07	9.34766e+07	1.20989e+08	9.24673e+07	1.21954e+08	1.40554e+08	1.15529e+08	102038239	327010	1.1158e+08	1.1294e+08	1.0382e+08	1.11934e+08	1.0709e+08	165101	8.4856e+07	8.27973e+07	1.15727e+08	1.21623e+08	8.64655e+07	1.19647e+08
UC1430000@0.813-rp	573324	732944	697181	557089	603529	1.1813e+06	696004	722218	608074	514305	376799	394291	610451	641371	605951	571113	545397	562928	531230	733530	605135	447993	530749	190648	926415	1.34474e+06	1.0878e+06	887770	1.03782e+06	208437	696878	657916	677581	528504	506772	545423
2-hydroxyethanesulfonicacid@1.08-rp	2.89093e+06	2.56627e+06	3.17665e+06	2.45431e+06	3.00832e+06	2.48163e+06	2.03397e+06	2.82699e+06	2.05841e+06	1.73849e+06	2.07002e+06	2.37683e+06	4.28213e+06	4.78703e+06	3.74875e+06	3.65985e+06	4.6607e+06	5.14561e+06	2.79761e+06	2.52923e+06	3.57257e+06	3.8143e+06	4.20879e+06	54535.8	3.26341e+06	3.43121e+06	3.25591e+06	3.22427e+06	3.43296e+06	28871.5	2.40364e+06	2.55271e+06	2.57422e+06	3452061	3.05472e+06	2.54618e+06
5hydroxymethylfurfural@1.018-rp	2.71611e+06	3.45506e+06	3.70872e+06	2.81912e+06	3.21801e+06	3.20259e+06	3.48241e+06	3.12551e+06	3.48901e+06	2.98565e+06	2.96008e+06	3.43322e+06	2.80275e+06	3.12275e+06	3.41687e+06	3.92806e+06	2.43475e+06	3.33276e+06	3.43051e+06	3.52958e+06	2.54044e+06	2.73281e+06	3.83827e+06	155384	3.20439e+06	3.38827e+06	3.22109e+06	3.02543e+06	3.04111e+06	152389	3.42171e+06	3.97311e+06	2.54466e+06	3.64532e+06	2.63241e+06	3.81175e+06
Imidazole-4-aceticacid@4.121-rp	1.18746e+06	1.41268e+06	1.12112e+06	1.02619e+06	1.38723e+06	1.23747e+06	1.25919e+06	962901	918656	1.19729e+06	860844	1.14719e+06	929719	964115	1.22547e+06	887530	1.19393e+06	1.11575e+06	833879	918694	958799	922612	810135	71482.6	996068	1.02039e+06	1.03724e+06	952810	1.08276e+06	54161.9	1.1423e+06	926116	1.15685e+06	1.1098e+06	1.05749e+06	894355
2-Propylthiophene@0.914-rp	1.84e+07	2.49333e+07	2.18814e+07	3.09071e+07	1.76537e+07	3.3205e+07	1.53364e+07	2.6822e+07	2.23268e+07	2.93469e+07	1.86023e+07	1.72216e+07	1.22349e+07	2.18325e+07	2.49714e+07	1.33252e+07	1.50263e+07	1.8363e+07	1.64711e+07	1.44464e+07	1.96275e+07	1.88512e+07	2.02426e+07	4.64221e+06	1.86051e+07	2.02289e+07	1.93287e+07	19127553	2.11313e+07	179287	2.66308e+07	1.82767e+07	1.55555e+07	1.56009e+07	1.96904e+07	2.00149e+07
2707@13.122-rp	40526.1	34542.3	31425.3	90241.1	33035.1	73305.8	17680.8	134637	31137.1	74371.1	38969.5	23138.4	24069.1	68035.6	68557.4	29382.1	732853	39110.4	146158	57966.5	41226	120343	37713.1	19307.8	88478.1	80491.8	95263.3	97766.1	101463	18293.9	423824	306112	32876.6	19568.7	36020.7	18351.1
2707@11.003-rp	1.08857e+07	1.65972e+07	1.02679e+07	5.35336e+06	9.48239e+06	1.05274e+07	8.28029e+06	1.0291e+07	8.4553e+06	9.8052e+06	8.64136e+06	1.15769e+07	9.57676e+06	8.76675e+06	1.05437e+07	8.50451e+06	9.73646e+06	9.97648e+06	1.06029e+07	1.00592e+07	1.21669e+07	1.43272e+07	9.11815e+06	38348.7	9.74643e+06	1.49267e+07	9.48983e+06	8.22833e+06	8.97757e+06	34463	1.1399e+07	7.42002e+06	9.33728e+06	1.31985e+07	8.95114e+06	7.35322e+06
2707@11.11-rp	3.04514e+06	1.65652e+07	1.02679e+07	9.26515e+06	3.86853e+06	1.91764e+06	3.68149e+06	5.16016e+06	4.02006e+06	5.64604e+06	3.85967e+06	3.81128e+06	2.64079e+06	5.02926e+06	5.09416e+06	4.05012e+06	4.094e+06	3.50582e+06	5.57832e+06	4.20205e+06	3.79377e+06	1.44518e+07	3.67064e+06	16522.7	4.523e+06	5.60085e+06	4.2426e+06	4.43091e+06	4.19487e+06	31902.5	4.09734e+06	3.73912e+06	925090	1.24083e+06	1.76366e+06	2.91034e+06
2707@9.842-rp	8.60576e+07	9.69428e+07	8.20805e+07	1.29771e+08	9.47233e+07	1.16885e+08	7.2904e+07	1.26281e+08	9.52995e+07	1.05458e+08	7.90318e+07	8.97018e+07	8.21206e+07	8.66248e+07	9.77265e+07	7.29574e+07	8.8884e+07	8.25845e+07	9.83865e+07	8.373e+07	8.19093e+07	8.10629e+07	8.82232e+07	2.04932e+06	9.03079e+07	8.91091e+07	9.60703e+07	9.93184e+07	1.0532e+08	2.11777e+06	1.30669e+08	9.18796e+07	8.08497e+07	1.04127e+08	9.65191e+07	8.11644e+07
2707@12.831-rp	1.87093e+06	3.03628e+06	1.7158e+06	1.9347e+06	2.56506e+06	2.83752e+06	2.63146e+06	2.10678e+06	2.55675e+06	2.19722e+06	2.9874e+06	2.36996e+06	1.87866e+06	1.9311e+06	2.44842e+06	2.40363e+06	2.24879e+06	1.86205e+06	2.9008e+06	2.99264e+06	2.494e+06	2.1353e+06	2.24682e+06	293812	2.12985e+06	2.50089e+06	2.52096e+06	2.16752e+06	2.2505e+06	424060	2.1262e+06	2.1402e+06	1.21354e+06	2.39296e+06	1.64241e+06	2.352e+06
127.02435@0.967-rp	3.74065e+07	3.99535e+07	3.75772e+07	3.23029e+07	3.21312e+07	3.19409e+07	4.08478e+07	4.38719e+07	4.15541e+07	3.92639e+07	3.88219e+07	5.36203e+07	4.54491e+07	4.62619e+07	3.61838e+07	4.03728e+07	4.4554e+07	4.46209e+07	3.31503e+07	3.82032e+07	3.63436e+07	3.91153e+07	3.94585e+07	84883.2	4.68145e+07	3.60214e+07	3.90123e+07	4.16089e+07	38753111	69403.9	3.95585e+07	4.06906e+07	3.98732e+07	4.23688e+07	4.21348e+07	3.62611e+07
Methyltrifluoroacetate@0.893-rp	6.14287e+06	5.58692e+06	5.5452e+06	5.39862e+06	5.07601e+06	5.60976e+06	5.61027e+06	5.53386e+06	5.97497e+06	5.44215e+06	5.27874e+06	5.24508e+06	5.9293e+06	5.32645e+06	5.7717e+06	5.30353e+06	5.71351e+06	5.52249e+06	5.60428e+06	5.54703e+06	5.97368e+06	5.22359e+06	5.64776e+06	1.04707e+06	5.8384e+06	5.82468e+06	5.28473e+06	5.57363e+06	5.69003e+06	1.16402e+06	5.47237e+06	5.67487e+06	5.23592e+06	6.07024e+06	5.67464e+06	5.47606e+06
Methylenesuccinate@1.398-rp	1.98137e+06	2.25698e+06	2.74083e+06	1.84216e+06	2.84318e+06	3.11004e+06	1.72005e+06	1.59676e+06	2.4335e+06	2.52112e+06	1.609e+06	1.46371e+06	2.41253e+06	1.52604e+06	1.8044e+06	1.76028e+06	1.99557e+06	1.63894e+06	1.94405e+06	2.28169e+06	2.21791e+06	1.69398e+06	2.38941e+06	66431.4	1.53693e+06	2.68789e+06	2.48521e+06	1.92056e+06	2.42923e+06	33592.6	2.44808e+06	2.83056e+06	2.03246e+06	3.46061e+06	1.49535e+06	2.05594e+06
2-hydroxyhexdienoicacid@9.839-rp	1.47557e+06	1.81408e+06	1.64335e+06	2.01422e+06	1.72341e+06	2.32712e+06	1.57134e+06	2.5257e+06	1.77198e+06	2.06321e+06	1.5227e+06	1.70784e+06	1.54063e+06	1.72271e+06	2.0981e+06	1.69535e+06	1.96995e+06	1.43349e+06	1.87407e+06	1.59959e+06	1.43519e+06	1.69833e+06	1.68891e+06	370454	1.56639e+06	1.62781e+06	1.82352e+06	1.63813e+06	1.81434e+06	317260	2.09632e+06	1.68926e+06	1.37698e+06	1.79669e+06	1.61949e+06	1.46217e+06
3-isopropyl-3-butenoicacid@6.359-rp	1.41347e+06	1.88302e+06	1.52367e+06	2.03549e+06	1.65288e+06	2.32858e+06	1.45851e+06	2.32051e+06	1.81309e+06	2.01746e+06	1.54231e+06	1.62645e+06	1.78425e+06	1.73424e+06	2.36247e+06	1.49204e+06	1.88946e+06	1.37356e+06	2.08172e+06	1.69257e+06	1.67031e+06	1.73464e+06	1.57563e+06	78401.3	1.8115e+06	1.87901e+06	1.79794e+06	1.8411e+06	1.80359e+06	65997.2	2.05442e+06	1.48911e+06	1.32111e+06	1.67867e+06	1.65561e+06	1.53986e+06
129.00376@0.905-rp	2.06119e+06	1.91702e+06	1.93877e+06	1.96911e+06	1.88128e+06	2.81963e+06	2.01275e+06	1.94883e+06	2.12004e+06	1.97841e+06	1.70508e+06	2.03181e+06	1.82566e+06	1.77386e+06	2.20396e+06	1.87613e+06	2.42943e+06	2.04117e+06	1.76369e+06	1.72851e+06	1.99185e+06	1.95988e+06	2.25567e+06	127945	1.99153e+06	2.07639e+06	1.80135e+06	1.90872e+06	2.09834e+06	194564	1.85893e+06	1.94269e+06	1.75947e+06	1.84394e+06	2.40484e+06	2.38286e+06
129.00456@0.888-rp	593825	442161	449456	438914	467263	549872	520549	518510	578532	435956	452575	478093	518660	444616	426459	509324	461936	442829	420628	399855	560698	419092	465078	27384.2	597040	540703	473875	525663	377950	55561.5	346347	406110	362669	412090	503526	440649
4-oxoproline@0.995-rp	1.74681e+08	1.77383e+08	1.35967e+08	1.52882e+08	1.4097e+08	1.41435e+08	1.54368e+08	1.97005e+08	1.65808e+08	1.73934e+08	1.43826e+08	2.16371e+08	1.92005e+08	1.77337e+08	1.55693e+08	1.70342e+08	1.79911e+08	1.57963e+08	1.47996e+08	1.56525e+08	1.55909e+08	1.71396e+08	1.7419e+08	178520	1.52283e+08	164744382	1.8009e+08	1.5481e+08	1.6963e+08	207986	1.626e+08	1.76941e+08	1.80042e+08	2.93115e+08	1.83211e+08	169803949
4-oxoproline@1.459-rp	1.44417e+07	2.66519e+07	2.9498e+07	3.42559e+07	1.87256e+07	2.53911e+07	1.82959e+07	2.97491e+07	1.38589e+07	3.93812e+07	1.52774e+07	1.8583e+07	1.40465e+07	1.26535e+07	1.36735e+07	1.2217e+07	3.47212e+07	1.37214e+07	1.28431e+07	1.89658e+07	1.5968e+07	1.54828e+07	1.69208e+07	3.39865e+06	2.94219e+07	3.203e+07	3.07134e+07	2.67732e+07	3.09405e+07	3.46122e+06	3.61261e+07	2.11478e+07	1.89072e+07	2.56341e+07	1.75767e+07	1.8534e+07
leucoline@9.519-rp	568268	443069	284191	462435	616004	376275	475029	451269	417545	363179	551428	412757	197438	296349	200184	279845	423505	452345	240233	299952	235444	203318	297886	44180.8	297739	354938	383550	356810	385604	110013	245931	646971	289180	319948	231082	375583
leucoline@3.06-rp	2.51568e+06	2.97561e+06	2.22175e+06	2.55291e+06	2.13573e+06	2.17135e+06	2.17836e+06	2.45379e+06	1.77057e+06	1.55497e+06	1.5846e+06	2.72421e+06	1.9562e+06	1.78631e+06	1.70014e+06	2.2099e+06	2.51016e+06	2.33554e+06	2.28359e+06	2.19543e+06	2.14548e+06	1.92515e+06	2.29112e+06	107485	2.26812e+06	1.99152e+06	2.17202e+06	1.87873e+06	2.24715e+06	115196	2.23861e+06	2.18615e+06	1.67589e+06	2.79773e+06	1.1995e+06	2.42954e+06
leucoline@10.935-rp	82714.9	119544	64509.4	99591.4	105090	89419.3	4.88251e+06	5.44705e+06	9.33475e+06	6.11025e+06	8.86743e+06	6.89744e+06	3.85814e+06	3.82168e+06	3.99078e+06	3.21472e+06	4.11083e+06	3.83637e+06	5.92857e+06	8.37807e+06	8.97067e+06	4.96065e+06	4.89056e+06	77095.1	5.29767e+06	5.61511e+06	5.14991e+06	4.5526e+06	5.78391e+06	16962.3	1.02707e+07	1.00475e+07	5.22736e+06	7.69503e+06	8.38966e+06	1.07309e+07
4-acetamidobutanal@0.884-rp	8.02316e+07	1.10301e+08	8.86935e+07	9.27216e+07	8.00752e+07	6.78762e+07	1.0102e+08	9.93409e+07	8.83055e+07	7.89767e+07	7.21887e+07	1.10429e+08	6.53858e+07	7.00092e+07	6.54242e+07	7.51044e+07	8.87397e+07	9.25175e+07	8.08319e+07	1.00676e+08	7.46504e+07	75683203	7.45111e+07	427533	7.61873e+07	8.40461e+07	8.63457e+07	7.15396e+07	8.18732e+07	378142	6.48789e+07	7.6463e+07	6.84672e+07	6.83307e+07	6.31565e+07	7.56828e+07
4-acetamidobutanal@1.19-rp	2.88115e+06	3.33042e+06	3.08032e+06	2.11258e+06	2.80219e+06	2.97104e+06	3.83978e+06	4.78039e+06	3.22523e+06	4.39331e+06	4.14199e+06	4.64964e+06	3.19702e+06	3.64424e+06	2.98392e+06	3.09557e+06	3.7367e+06	4.04713e+06	3.48064e+06	3.21191e+06	3.3887e+06	3.76387e+06	4.10358e+06	98041.8	3.57648e+06	3.68402e+06	3.81893e+06	3.14911e+06	3.66333e+06	91363.3	3.66909e+06	3.14004e+06	3.19715e+06	4.08589e+06	3.25886e+06	3.7945e+06
2,5-dioxopentanoicacid@1.421-rp	7.8369e+06	1.07457e+07	8.2069e+06	1.1136e+07	9.98781e+06	1.17969e+07	9.55613e+06	1.51887e+07	9.89034e+06	1.14241e+07	8.44259e+06	1.07931e+07	1.03168e+07	9.78796e+06	1.0378e+07	7.54921e+06	1.02338e+07	8.23483e+06	1.05517e+07	9.72837e+06	1.06495e+07	9.89504e+06	8.37036e+06	224672	8.31679e+06	1.00078e+07	1.06055e+07	8.78752e+06	1.00576e+07	30298.7	1.13291e+07	8.79287e+06	7.23703e+06	9.07485e+06	7.75963e+06	8.51216e+06
1099281@9.227-rp	21003.8	31272	29011.4	24423.3	18053.9	18100	57544.3	20922	61634.1	37515.5	33040.1	20685.2	38315.3	19635.4	18439	19486.7	24923.2	24661.9	30811.5	59232.6	69632.6	33487.3	34732.4	20213.1	289563	367907	285438	354653	323905	32836.2	1.89129e+06	1.91794e+06	1.39287e+06	1.145e+06	1.44747e+06	1.65317e+06
1-oxa-2-oxo-3-hydroxycycloheptane@3.09-rp	1.13173e+07	2.03754e+07	1.87256e+07	1.19208e+07	1.50465e+07	1.81841e+07	1.67402e+07	8.32371e+06	1.69576e+07	1.30277e+07	1.65771e+07	1.15553e+07	1.37895e+07	1.8841e+07	1.5748e+07	1.76579e+07	1.113e+07	1.25638e+07	1.45994e+07	1.63981e+07	8.42999e+06	1.56977e+07	2.11326e+07	1.32333e+06	1.47698e+07	1.55155e+07	1.53949e+07	1.46118e+07	1.58538e+07	692735	1.48298e+07	2.03955e+07	1.80784e+07	1.95047e+07	1.4807e+07	1.26501e+07
1-oxa-2-oxo-3-hydroxycycloheptane@3.492-rp	8.61984e+06	1.6873e+07	1.31051e+07	9.19349e+06	1.15619e+07	1.39372e+07	1.19333e+07	6.59799e+06	1.3167e+07	1.01102e+07	1.2536e+07	9.51842e+06	1.15889e+07	1.7504e+07	1.30424e+07	1.46633e+07	1.08173e+07	1.15419e+07	1.26801e+07	1.40034e+07	7.31788e+06	1.21108e+07	1.7926e+07	1.25075e+06	1.25087e+07	1.23303e+07	1.13353e+07	1.20798e+07	1.22774e+07	45604.3	1.03111e+07	1.34777e+07	1.26438e+07	1.3372e+07	1.08736e+07	8.97027e+06
iminodiacetate@0.969-rp	1.22709e+07	1.5407e+07	8.79124e+06	1.46951e+07	1.4807e+07	1.31627e+07	1.1618e+07	9.02208e+06	8.82779e+06	1.17001e+07	1.24841e+07	1.44023e+07	1.20561e+07	9.06316e+06	7.55879e+06	8.35121e+06	9.15324e+06	1.34707e+07	9.07033e+06	1.29246e+07	1.24196e+07	1.03986e+07	1.03068e+07	31982.7	1.03573e+07	1.10032e+07	1.19164e+07	1.12612e+07	9.87802e+06	32235	9.07861e+06	7.88584e+06	9.90626e+06	1.13261e+07	8.84179e+06	1.30206e+07
2-amino-4-oxopentanoicacid@1.002-rp	3.17472e+06	3.74165e+06	3.19279e+06	3.05655e+06	3.16089e+06	2.6915e+06	2.65634e+06	3.02974e+06	3.83164e+06	2.0447e+06	2.88309e+06	2.62232e+06	3.93672e+06	1.96962e+06	2.78754e+06	3.36697e+06	2.77728e+06	3.02539e+06	2.91588e+06	3.23391e+06	2.42359e+06	2.18666e+06	2.13968e+06	169893	2.70222e+06	2.96605e+06	2.88791e+06	2.50668e+06	2.81258e+06	63690.2	2.01858e+06	1.89755e+06	2.10616e+06	2.45402e+06	2.44671e+06	2.64304e+06
2-amino-4-oxopentanoicacid@1.65-rp	1.58651e+06	2.16415e+06	1.5793e+06	1.51672e+06	1.98706e+06	1.90344e+06	1.94292e+06	1.81842e+06	2.10114e+06	1.79124e+06	2.3714e+06	1.7754e+06	4.25469e+06	4.03341e+06	3.42693e+06	3.62166e+06	4.04282e+06	3.71058e+06	1.81991e+06	2.34461e+06	2.42662e+06	1.79133e+06	1.54217e+06	500219	2.23005e+06	2.43957e+06	2.27631e+06	2.09544e+06	2.35587e+06	216076	1.90267e+06	1.87009e+06	1.43807e+06	1.66582e+06	1.46608e+06	1.81869e+06
Creatine@1.056-rp	6.85023e+07	9.81685e+07	7.15465e+07	7.05837e+07	7.07472e+07	7.0768e+07	7.72656e+07	7.34382e+07	7.24861e+07	7.38268e+07	5.37442e+07	9.44812e+07	6.04966e+07	6.61615e+07	6.55338e+07	6.55415e+07	7.00319e+07	8.58513e+07	5.94321e+07	7.62766e+07	7.52882e+07	7.1239e+07	8.79216e+07	163333	6.83458e+07	6.96902e+07	7.30105e+07	6.70824e+07	7.40442e+07	197438	6.3796e+07	6.74359e+07	6.6612e+07	8.17647e+07	4.46696e+07	7.49304e+07
Skatole@3.057-rp	6.06516e+06	6.76169e+06	4.97411e+06	6.70151e+06	5.21275e+06	4.75361e+06	4.22803e+06	5.57254e+06	4.07847e+06	3.31675e+06	3.09359e+06	5.69559e+06	4.06789e+06	4.05467e+06	3.35252e+06	4.3528e+06	4.91319e+06	5.14802e+06	4.74317e+06	5.04915e+06	5.052e+06	4.43225e+06	4.99582e+06	24416.2	4.61392e+06	4.71912e+06	4.66134e+06	4.19417e+06	4.58033e+06	23086	4.18715e+06	5.17122e+06	3.47972e+06	6.20304e+06	2.47299e+06	5.03794e+06
Alloisoleucine@1.309-rp	2.07613e+08	345430990	241193111	2.64614e+08	2.34349e+08	2.01868e+08	2.31608e+08	3.07863e+08	2.80314e+08	239485200	2.52066e+08	3.38912e+08	2.29236e+08	2.78248e+08	2.21833e+08	2.29782e+08	2.74766e+08	2.59841e+08	2.63576e+08	3.04066e+08	2.09657e+08	1.94562e+08	245222680	5.91155e+06	259822413	2.39803e+08	248733160	2.08197e+08	2.51021e+08	6.09024e+06	2.22162e+08	2.67015e+08	1.96948e+08	2.37361e+08	1.78658e+08	217755275
3-Methylsulfolene@1.215-rp	4.92205e+07	7.1107e+07	5.2457e+07	5.21352e+07	5.19612e+07	4.68764e+07	6.70207e+07	7.82085e+07	6.21125e+07	6.77962e+07	6.42633e+07	8.1495e+07	4.95774e+07	5.16364e+07	5.29109e+07	5.59708e+07	6.05833e+07	7.2819e+07	6.00229e+07	6.96687e+07	5.70698e+07	5.82805e+07	5.3861e+07	191539	5.52785e+07	5.86456e+07	6.19839e+07	5.22735e+07	6.01453e+07	37478.2	4.71643e+07	5.02472e+07	3.34494e+07	5.1078e+07	3.91706e+07	5.55694e+07
2-acetolacticacid@8.937-rp	1.39763e+06	1.96052e+06	1.41945e+06	1.98038e+06	1.56445e+06	2.12746e+06	1.38997e+06	2.31237e+06	1.63419e+06	1.93558e+06	1.22594e+06	1.56705e+06	1.45799e+06	1.60975e+06	2.10344e+06	1.52906e+06	1.57098e+06	1.34136e+06	1.9219e+06	1.75862e+06	1.68375e+06	1.51179e+06	1.47781e+06	152054	1.67476e+06	1.68899e+06	1.6914e+06	1.45806e+06	1.63114e+06	138002	1.8631e+06	1.39306e+06	1.29746e+06	1.80911e+06	1.82145e+06	1.47521e+06
2-acetolacticacid@2.194-rp	961804	1.21279e+06	987614	1.43157e+06	1.08123e+06	1.26914e+06	1.26169e+06	1.46761e+06	1.45832e+06	1.28526e+06	1.73702e+06	1.62784e+06	1.72334e+06	1.62818e+06	1.56112e+06	1.75551e+06	1.78274e+06	1.47089e+06	1.62493e+06	2.03809e+06	2.06473e+06	1.99002e+06	1.7979e+06	69886	1.71366e+06	1.77567e+06	1.79676e+06	1.72775e+06	1.60285e+06	101136	1.6738e+06	1.82998e+06	1.16509e+06	1.55747e+06	1.54744e+06	1.66201e+06
132.04476@5.118-rp	102549	81532.6	80455.2	78727.9	163132	84559.6	4.08637e+06	1.93833e+06	2.09674e+06	2.45515e+06	3.04386e+06	3.202e+06	1.48285e+06	1.60691e+06	1.45153e+06	1.09236e+06	1.4995e+06	1.91801e+06	2.09549e+06	2.44672e+06	2.64345e+06	2.07215e+06	2.65837e+06	96116.4	1.73466e+06	1.89292e+06	1.70266e+06	1.60287e+06	1.95899e+06	78311.6	2.27971e+06	2.76783e+06	1.48895e+06	904239	2.54323e+06	2.97831e+06
3-ureidopropionicacid@0.987-rp	3.33725e+06	4.04073e+06	2.98821e+06	4.13112e+06	2.86921e+06	3.1212e+06	3.46501e+06	4.50739e+06	3.46867e+06	2.89946e+06	2.58891e+06	5.63894e+06	2.72785e+06	4.13784e+06	2.84167e+06	3.82834e+06	4.31643e+06	4.1124e+06	3.53065e+06	3.70968e+06	3.24524e+06	3.38943e+06	3.61547e+06	91963.3	3.18429e+06	3.25551e+06	3.47182e+06	3.37418e+06	3.24327e+06	95409.7	2.27564e+06	2.61026e+06	3.08287e+06	3.481e+06	1.89409e+06	3.51753e+06
3-ureidopropionicacid@1.408-rp	1.18043e+06	2.59862e+06	1.54369e+06	1.60516e+06	1.60148e+06	1.4734e+06	4.69535e+06	3.22603e+06	4.07594e+06	2.71349e+06	6.09296e+06	5.61024e+06	1.65761e+06	1.7705e+06	1.79145e+06	2.08012e+06	2.76995e+06	2.84036e+06	4.15178e+06	6.90862e+06	3.10982e+06	3.83634e+06	3.52162e+06	176218	2.54317e+06	3.18366e+06	3.47261e+06	2.29607e+06	3.1542e+06	117474	2.32342e+06	3.82024e+06	952023	3.50894e+06	1.06277e+06	2.1284e+06
2-hydroxycaproicacid@4.994-rp	356498	558804	732003	473748	616248	713859	1.47587e+06	1.09203e+06	1.83752e+06	1.26957e+06	2.06934e+06	1.44469e+06	1.17356e+06	1.53059e+06	1.17795e+06	1.55698e+06	1.56554e+06	1.20757e+06	1.59637e+06	2.07007e+06	1.55284e+06	1.80378e+06	1656262	224371	1.26673e+06	1.24652e+06	1.24908e+06	1.11687e+06	1.27834e+06	141989	845484	1.14642e+06	781794	790403	732631	939437
2-hydroxycaproicacid@5.272-rp	67551.7	171164	131210	71202.7	146753	115814	728077	410267	1.30718e+06	589075	1.22437e+06	722078	452881	549257	446438	521285	574739	437517	743516	1.13986e+06	903430	686757	621623	225830	517673	525502	500300	425419	479933	96202.7	407498	486803	205402	200841	200678	505529
2,4-diaminopentanoicacid@1.029-rp	6.18373e+06	9.28722e+06	7.48977e+06	7.18767e+06	6.74028e+06	6.73448e+06	1.02567e+07	8.69736e+06	8.60213e+06	8.31577e+06	9.24715e+06	1.20448e+07	8.01189e+06	7.70286e+06	7.12466e+06	7.33622e+06	9.57143e+06	8.72279e+06	7.17038e+06	8.26691e+06	7.72118e+06	8.85515e+06	6.94479e+06	120084	7.62939e+06	8.26531e+06	8.06407e+06	8.26936e+06	8.5204e+06	68792.6	5.96268e+06	8.67428e+06	7.37035e+06	8.32375e+06	6.94578e+06	8.49436e+06
2,4-diaminopentanoicacid@0.883-rp	7.99431e+06	1.64002e+07	8.48865e+06	1.3158e+07	9.15148e+06	8.41452e+06	1.39231e+07	1.51896e+07	1.16882e+07	1.11734e+07	1.03332e+07	1.45384e+07	7.73121e+06	8.02804e+06	8.63738e+06	8.58662e+06	1.21497e+07	1.32463e+07	1.15614e+07	1.19874e+07	1.11184e+07	9.88888e+06	7.92986e+06	861928	1.04191e+07	1.21702e+07	1.13922e+07	1.01985e+07	1.11681e+07	767381	8.10953e+06	9.91179e+06	9.09105e+06	7.84429e+06	6.7445e+06	9.84745e+06
4-hydroxyindole@5.113-rp	217155	206201	205430	192628	429268	229226	9.0153e+06	3.56826e+06	4.93691e+06	4.99704e+06	6.15621e+06	6.78772e+06	3.82347e+06	3.73951e+06	3.56263e+06	2.13373e+06	3.18633e+06	3.65551e+06	3.96563e+06	6.70411e+06	6.11071e+06	4.15742e+06	4.72358e+06	91767	3.54731e+06	4.06797e+06	3.2689e+06	2.80671e+06	2.83989e+06	103559	5.73413e+06	6.77193e+06	3.35479e+06	2.00835e+06	5.36393e+06	6.46813e+06
133.95351@1.097-rp	2.58048e+06	3.26477e+06	2.7393e+06	2.5116e+06	2.58177e+06	2.6784e+06	2.50768e+06	1.15158e+06	2.93076e+06	2.45992e+06	3.61484e+06	2.38277e+06	3.215e+06	3.15944e+06	2.41336e+06	2.52149e+06	2.93509e+06	2.63702e+06	1.98792e+06	2.92291e+06	2.67994e+06	2.91283e+06	1.62046e+06	42329.6	2.47354e+06	2.36232e+06	2.33244e+06	2.09079e+06	2.69193e+06	27506.2	2.1863e+06	1.90425e+06	1.7647e+06	1.23915e+06	2.08779e+06	1.61152e+06
133.97472@0.956-rp	733455	874068	639697	764055	879220	749378	865858	724039	720901	761443	789984	767683	898878	788471	737388	701270	745247	748375	668684	776366	576450	717026	654202	58064.4	760626	949577	731491	631094	642050	25147.5	789380	708982	626996	800307	714062	867593
3-dehydrothreonicacid@1.203-rp	2.13379e+07	4.42378e+07	3.07345e+07	2.57917e+07	3.23276e+07	3.54344e+07	3.31194e+07	1.05818e+07	3.18894e+07	2.65026e+07	4.35823e+07	2.92959e+07	1.17465e+07	2.08848e+07	8.80558e+06	1.62876e+07	1.36574e+07	1.68001e+07	1.32017e+07	2.36395e+07	1.411e+07	1.39143e+07	1.64422e+07	1.22173e+06	2.39875e+07	2.28154e+07	2.39671e+07	2.55035e+07	2.26769e+07	1.13251e+06	2.51892e+07	4.21208e+07	1.66482e+07	4.10487e+07	2.29877e+07	3.27255e+07
2,3-dihydroxy-3-methylbutanoicacid@1.41-rp	905259	1.095e+06	895918	1.10477e+06	1.07146e+06	1.15575e+06	1.06805e+06	1.23761e+06	1.12198e+06	1.37466e+06	1.14285e+06	1.24155e+06	1.07463e+06	1.39421e+06	1.32287e+06	1.04516e+06	1.4528e+06	1.2342e+06	1.08997e+06	1.24912e+06	1.15516e+06	1.04095e+06	950131	16177.1	1.09404e+06	1.03739e+06	1.13843e+06	1.04698e+06	1.09571e+06	21297.1	922143	825854	667423	817920	800081	992739
Chavicol@9.848-rp	4.11421e+06	4.57859e+06	4.12093e+06	5.61469e+06	4.2789e+06	5.22265e+06	3.77186e+06	5.57795e+06	4.31585e+06	5.10821e+06	3.42326e+06	4.38308e+06	3.49796e+06	4.01834e+06	4.2977e+06	3.55852e+06	4.5144e+06	3.80208e+06	4.00791e+06	3.87134e+06	3.80944e+06	3.86914e+06	3.62644e+06	428873	4.25954e+06	4.18954e+06	4.57308e+06	3.99035e+06	4.37576e+06	398214	5.69013e+06	4.3262e+06	3.83555e+06	4.96722e+06	4.53716e+06	4.07674e+06
135.00672@2.393-rp	192183	5.78787e+07	2.11953e+07	1.94558e+07	3.1324e+07	7.41214e+07	96961.4	1.33279e+07	254560	1.07272e+06	1.04867e+06	179183	162025	172469	893555	256903	350264	97541.2	1.06848e+06	2.50656e+07	1.23231e+07	1.70651e+06	1.0156e+07	39187.7	1.67498e+07	1.71753e+07	1.70579e+07	1.63099e+07	1.78508e+07	40089.8	6.4082e+07	4.75163e+07	1.71418e+07	5.87033e+07	276292	2.67199e+07
135.04069@1.034-rp	2.1254e+06	1.55107e+06	1.59683e+06	1.35609e+06	1.62699e+06	1.91514e+06	1.50747e+06	1.43697e+06	1.92547e+06	1.43226e+06	922436	1.4416e+06	1.76364e+06	1.60387e+06	1.82743e+06	1.48278e+06	1.3248e+06	1.45818e+06	1.95053e+06	1.68416e+06	1.22722e+06	1.40096e+06	2.31145e+06	29240.2	1.87001e+06	1.80867e+06	1.5469e+06	1.57584e+06	1.60139e+06	20894.9	1.63465e+06	1.93764e+06	1.20711e+06	1.64791e+06	1.1302e+06	1.53926e+06
Adenine@4.297-rp	590441	284421	3.69405e+06	3.34085e+06	155457	212973	96716.3	8.06542e+06	859711	1.30116e+06	193537	254531	267656	797942	4.63894e+06	1.50611e+06	307534	116197	4.80203e+06	1.49866e+06	5.01395e+06	3.45111e+06	209455	68926	1.64955e+06	1.79133e+06	1.57258e+06	1.52183e+06	1.71151e+06	69729.8	995566	1.9233e+06	375972	846363	1.18023e+06	1.73996e+06
2-phenylacetamide@1.447-rp	2.61614e+07	4.73891e+07	3.1445e+07	3.69991e+07	3.57306e+07	3.78298e+07	4.13497e+07	3.57427e+07	3.32495e+07	2.49138e+07	3.34055e+07	4.44232e+07	1.75402e+07	2.51217e+07	2.25844e+07	2.43967e+07	3.54242e+07	3.14905e+07	3.46969e+07	3.69714e+07	2.54542e+07	3.08028e+07	3.15784e+07	156826	3.08271e+07	3.07941e+07	3.19247e+07	2.56561e+07	3.34909e+07	152598	2.65469e+07	3.07324e+07	2.02685e+07	3.798e+07	1.90395e+07	32859738
2-phenylacetamide@5.981-rp	23203.7	22512.2	24665	23429.4	23453.5	22776.1	33994.9	23084.5	24727.6	23967.7	33204.8	23155.9	27163.2	22907.4	22236.8	24527.3	22633.9	23946.6	45980.7	45924.7	40586.6	24022.2	23033.4	23213.8	192978	187295	188110	179775	200214	23196.6	1.2702e+06	1.07532e+06	787110	587903	1.03491e+06	1.11442e+06
135.93281@0.937-rp	1.48758e+06	4.17381e+06	1.4919e+06	1.66916e+06	2.48853e+06	2.35798e+06	2.27383e+06	2.28174e+06	1.65165e+06	1.21507e+06	1.94462e+06	3.10319e+06	1.32458e+06	1.11817e+06	1.55066e+06	1.51722e+06	2.17244e+06	2.7811e+06	1.71294e+06	5.46464e+06	2.844e+06	1.42974e+06	2.45698e+06	20975.2	2.28958e+06	2.75973e+06	2.65581e+06	2.11464e+06	2.01616e+06	14924.1	1.83223e+06	1.68798e+06	2.09635e+06	2.43901e+06	1.77124e+06	2.43783e+06
Erythronicacid@1.072-rp	2.92707e+07	3.642e+07	2.48335e+07	2.35977e+07	4.6076e+07	2.5591e+07	2.54563e+07	2.44524e+07	2.62491e+07	2.72559e+07	2.97705e+07	3.27523e+07	2.12927e+07	2.49758e+07	2.57939e+07	2.38722e+07	2.73744e+07	3.51653e+07	2.69871e+07	4.9567e+07	3.41575e+07	2.53094e+07	3.06679e+07	81180.4	2.83709e+07	2.76965e+07	2.72297e+07	2.88091e+07	3.20572e+07	100014	2.53757e+07	2.26154e+07	2.24148e+07	2.88641e+07	2.55398e+07	2.83305e+07
Erythronicacid@1.37-rp	688195	2.41041e+06	1.40369e+06	2.5379e+06	1.14068e+06	1.77433e+06	3.44821e+06	3.03803e+06	768204	2.41855e+06	508268	4.6675e+06	2.13367e+06	1.54675e+06	661366	673851	3.37462e+06	2.51326e+06	1.38051e+06	2.77931e+06	2.00852e+06	888260	2.22019e+06	66975.6	1.90604e+06	1.97335e+06	1.69557e+06	2.24632e+06	2.34263e+06	25280.1	1.59055e+06	515513	565412	979987	614489	1.0209e+06
Hypoxanthine@2.397-rp	270258	6.29537e+07	8.93112e+07	3.73801e+07	2.77859e+07	1.67766e+08	209894	6.74602e+07	1.28364e+06	1.51415e+06	526004	668110	272126	511880	5.18353e+06	965852	258343	113593	4.68832e+06	4.54304e+07	1.76138e+07	4.22595e+06	5.39683e+06	154274	2.37846e+07	2.44326e+07	3.34797e+07	2.21825e+07	3.28784e+07	138771	113397156	9.41969e+07	1.19925e+07	138371279	1.64342e+06	2.97391e+07
1-methylnicotinamide@1.021-rp	1.26627e+06	1.42617e+06	672569	1.07803e+06	937405	1.06668e+06	749338	1.46051e+06	1.15778e+06	931813	890997	1.4338e+06	1.16489e+06	1.27947e+06	982181	786819	907214	900587	924069	992719	847791	1.08537e+06	1.5573e+06	34465	1.18851e+06	996526	1.12958e+06	928059	1.03588e+06	26661.6	1.08493e+06	1.01121e+06	999758	835083	956940	703104
137.03543@2.44-rp	19781.9	85013.2	1.33911e+06	428091	215200	970729	23155.5	921586	23296.9	19588.3	19517.2	21069.9	20541.6	20590	64914.8	19383.1	23183.4	20447.2	48850.8	357054	177402	31323.2	59202.1	23320.7	290435	244343	279375	238524	280641	18912.1	895813	1.12419e+06	122611	1.2348e+06	20631.2	245403
137.04158@2.448-rp	17251.7	2.59667e+06	4.5275e+06	1.86065e+06	969963	3.19227e+06	20193.8	3.40051e+06	64165.8	64205.4	17020.9	27525.1	17914.3	18708.6	242251	44300.9	19674.8	18383.7	204333	1.30667e+06	754077	189752	186412	20337.9	1.04856e+06	1.09309e+06	1.00252e+06	957885	1.1056e+06	16493.2	3552707	4.40075e+06	496320	4.59448e+06	61804.9	954048
2-pyridylaceticacid@1.199-rp	9.27995e+06	1.28954e+07	9.63856e+06	9.19862e+06	1.20053e+07	1.00644e+07	1.43059e+07	1.44718e+07	1.40238e+07	1.43708e+07	1.12455e+07	1.31825e+07	1.10579e+07	8.46306e+06	1.00914e+07	9.71625e+06	1.11504e+07	1.53897e+07	1.08313e+07	1.21289e+07	1.2673e+07	8.59494e+06	1.0987e+07	130357	1.13528e+07	1.15614e+07	1.14769e+07	1.01782e+07	1.14639e+07	77552.6	1.06276e+07	1.07236e+07	8.09014e+06	8.78051e+06	9.64742e+06	1.1393e+07
2-pyridylaceticacid@1.417-rp	861829	1.46857e+06	1.1411e+06	2.07758e+06	1.06898e+06	1.37173e+06	1.29364e+06	1.31597e+06	1.16311e+06	1.62692e+06	1.07603e+06	1.24071e+06	602432	905044	914309	747045	1.57653e+06	1.14708e+06	1.19524e+06	1.48988e+06	1.07775e+06	975999	950734	56158.9	1.57743e+06	1.17024e+06	1.65157e+06	1.23874e+06	1.1306e+06	47318.8	1.21797e+06	1.25274e+06	918671	860160	1.06665e+06	1.30458e+06
2-aminonicotinicacid@1.426-rp	3.98405e+06	1.2431e+07	1.86641e+07	2.71219e+07	7.39544e+06	1.34853e+07	5.09642e+06	1.73188e+07	2.36578e+06	2.84279e+07	4.52929e+06	5.06668e+06	4.818e+06	3.43673e+06	3.52865e+06	2.68926e+06	2.32818e+07	3.35984e+06	4.69393e+06	8.79871e+06	8.12578e+06	5.36199e+06	8.52965e+06	883351	1.72002e+07	1.62138e+07	1.61639e+07	1.37447e+07	1.57623e+07	881392	1.98183e+07	6.42284e+06	5.95384e+06	9.68649e+06	3.59278e+06	5.09833e+06
2-aminonicotinicacid@1.778-rp	1.84229e+06	2.98087e+06	2.82225e+06	1883310	2.02279e+06	2.02933e+06	2.21466e+06	2.55335e+06	2.18541e+06	2.28709e+06	2.25293e+06	2.9747e+06	2.7346e+06	2.10959e+06	2.01353e+06	2.67744e+06	2.33463e+06	1.92535e+06	1.85841e+06	2.04302e+06	1.55369e+06	3.37933e+06	3.18674e+06	236230	3.32326e+06	3.84838e+06	3.48065e+06	3.32071e+06	1.72141e+06	344535	1.73373e+06	3.00238e+06	3.06076e+06	2.50758e+06	2.62419e+06	1.74715e+06
3,6-nonadienal@11.064-rp	3.01949e+06	3.52677e+06	3.21632e+06	3.95928e+06	3.44916e+06	4.04294e+06	2.75068e+06	4.83326e+06	3.52408e+06	3.55626e+06	2.58055e+06	3.58148e+06	3.11532e+06	2.89212e+06	3.13287e+06	2.81587e+06	3.32047e+06	2.7806e+06	3.52701e+06	2.78595e+06	3.38231e+06	2.96059e+06	3.08253e+06	243386	3.02169e+06	3.27754e+06	3.54255e+06	2.88492e+06	3.71203e+06	293677	4.6883e+06	3.18444e+06	2.87285e+06	3.71654e+06	3.5375e+06	3.5714e+06
139.06077@1.071-rp	3.99483e+06	3.58458e+06	2.78707e+06	2.99471e+06	3.75613e+06	3.92825e+06	3.21265e+06	5.26058e+06	5.39622e+06	2.63312e+06	2.67347e+06	3.28465e+06	3.12793e+06	3.21492e+06	4.1828e+06	3.06261e+06	2.33842e+06	2.50627e+06	3.7771e+06	3.14584e+06	2.26093e+06	1.87397e+06	2.78996e+06	95968	2.9356e+06	3.59682e+06	3.37399e+06	2.67267e+06	3.14474e+06	35728.8	2.49713e+06	4.09952e+06	2.29502e+06	2.80114e+06	2.76088e+06	3.12442e+06
Deferiprone@6.496-rp	111255	682585	49330.7	64322.8	274556	548152	79015.5	49625	60078.8	117435	126725	153481	85769.9	54609.7	68148.4	59685.4	310319	134773	50864	185148	149531	129508	245589	17307.8	150390	142526	142570	137132	171057	16818.2	203761	84177.5	127188	187154	80887	117598
MalonylChloride@0.803-rp	1.42845e+06	759213	692759	476892	1.16173e+06	1.30886e+06	1.68444e+06	1.58764e+06	582940	536604	929009	371824	693734	958588	641319	613924	581651	692063	575652	2.21079e+06	1.3845e+06	940942	608783	247559	1.11585e+06	1.30442e+06	1.49207e+06	1.08279e+06	1.48611e+06	122578	453894	565501	569358	570653	543975	454338
2,4,5-trihydroxytoluene@3.714-rp	590918	764305	609441	840722	805050	877755	519771	988515	633079	758920	514262	702355	599791	633482	756165	532506	679736	553961	766302	763999	628286	610629	647288	166667	719980	677839	695178	538191	633864	97585	879299	618641	452910	713423	632639	573672
1,2-dihydroethylcatechol@7.557-rp	4.42784e+06	7.56769e+06	5.09359e+06	8.2161e+06	5.73128e+06	7.4329e+06	7.55223e+06	9.63123e+06	5.85753e+06	7.9208e+06	5.55292e+06	8.14668e+06	7.52968e+06	7.2986e+06	6.29156e+06	4.69386e+06	8.01197e+06	6.67296e+06	7.60741e+06	7.07882e+06	6.82374e+06	6.1812e+06	5.79463e+06	1.07464e+06	6.37388e+06	6.51872e+06	6.44375e+06	5.44693e+06	6.27155e+06	709657	5.98836e+06	4.336e+06	4.72401e+06	6.10854e+06	4.0811e+06	5.20743e+06
1,2-dihydroethylcatechol@8.114-rp	5.69299e+06	7.02647e+06	6.26905e+06	7.89886e+06	7.42019e+06	7.75544e+06	5.79866e+06	8.88517e+06	6.8879e+06	7.12627e+06	5.28862e+06	6.35152e+06	6.61755e+06	6.47419e+06	7.28551e+06	6.04785e+06	7.5054e+06	5.22678e+06	6.66167e+06	6.39324e+06	6.9128e+06	6.5919e+06	6.58862e+06	886236	5.90728e+06	6.68078e+06	7.43644e+06	6.90203e+06	6.01827e+06	1.05946e+06	8.15479e+06	6.07123e+06	5.00324e+06	6.90816e+06	6.91176e+06	5.53976e+06
RA8509050@11.063-rp	3.33032e+06	4.1499e+06	3.60605e+06	4.48388e+06	3.33629e+06	4.29806e+06	2.80173e+06	4.86895e+06	3.57822e+06	3.77387e+06	3.13511e+06	3.40863e+06	3.06955e+06	3.0282e+06	3.68813e+06	2.74459e+06	3.23927e+06	2.87136e+06	3.73416e+06	3.07803e+06	2.98811e+06	3.32607e+06	3.16062e+06	321466	3.56246e+06	4.23542e+06	3.33965e+06	3.80101e+06	3.49791e+06	298315	4.35387e+06	3.48241e+06	2.88019e+06	3.63919e+06	3.76989e+06	3.11224e+06
141.02754@0.836-rp	3.0678e+07	5.23267e+07	3.9393e+07	3.2165e+07	4.2998e+07	3.97239e+07	4.7633e+07	4.37781e+07	3.78402e+07	4.39359e+07	3.80602e+07	4.0376e+07	4.26861e+07	3.60023e+07	3.20725e+07	3.02187e+07	3.6661e+07	3.5925e+07	3.15515e+07	3.95514e+07	2.79313e+07	3.52762e+07	3.38293e+07	3.34712e+06	3.52889e+07	4.20538e+07	3.72911e+07	3.61096e+07	4.28409e+07	2.4806e+06	4.31776e+07	5.11131e+07	5.03519e+07	5.89149e+07	3.09663e+07	4.61844e+07
141.04004@0.967-rp	2.76987e+06	4.14478e+06	3.87964e+06	3.45813e+06	3.1559e+06	3.17629e+06	3.69776e+06	3.58433e+06	3.33338e+06	2.4641e+06	3.69945e+06	4.45507e+06	3.17951e+06	3.12075e+06	2.80728e+06	3.5357e+06	3.69886e+06	4.78121e+06	3.19138e+06	3.98244e+06	2.54523e+06	2.79658e+06	3.16222e+06	46514.6	3.26523e+06	3.03919e+06	3.57755e+06	3.49562e+06	3.51495e+06	17008.8	2.73492e+06	3.34805e+06	2.16486e+06	2.85434e+06	2.55428e+06	2.76077e+06
Pyrrolo(2,1,5-cd)indolizine@3.057-rp	1.5069e+06	1.98551e+06	1.28713e+06	1.73511e+06	1.35515e+06	1.32389e+06	1.11319e+06	1.48904e+06	1.03906e+06	1.01597e+06	976378	1.58461e+06	1.15945e+06	1.13657e+06	982940	1.24347e+06	1.5363e+06	1.3635e+06	1.29715e+06	1.46006e+06	1.37209e+06	1.22313e+06	1.52274e+06	23438.8	1.17431e+06	1.33087e+06	1.30469e+06	1.27418e+06	1.24157e+06	22161.8	1.27423e+06	1.43991e+06	867928	1.64077e+06	656247	1.29535e+06
141.94062@0.943-rp	5.84373e+06	7.45018e+06	6.65796e+06	4.42756e+06	5.74144e+06	6.40341e+06	6.53859e+06	3.30813e+06	7.04263e+06	4.68514e+06	6.75289e+06	6.14009e+06	5.48852e+06	6.51189e+06	6.22479e+06	7.37196e+06	6.4532e+06	7.40498e+06	4.07327e+06	6.48485e+06	5.94069e+06	7.11269e+06	3.4215e+06	613369	4.93245e+06	6.84837e+06	5.34361e+06	6.00475e+06	6.15289e+06	1.2073e+06	4.42112e+06	4.48852e+06	3.57571e+06	3.86279e+06	4.62662e+06	3.3488e+06
142.01151@0.848-rp	1.9512e+07	3.29255e+07	2.91437e+07	2.32428e+07	2.6009e+07	2.7681e+07	3.30446e+07	2.80114e+07	2.25422e+07	2.56621e+07	2.35369e+07	2.58595e+07	2.70286e+07	2.28574e+07	2.02142e+07	1.91085e+07	2.23023e+07	2.34051e+07	2.11364e+07	2.77576e+07	2.17584e+07	2.09275e+07	2.54878e+07	1.93101e+06	2.43928e+07	2.62792e+07	2.77011e+07	2.16521e+07	2.69242e+07	1.5256e+06	2.52911e+07	3.37782e+07	3.23169e+07	3.68464e+07	2.32455e+07	2.98519e+07
142.02411@0.913-rp	9.44901e+08	9.24023e+08	9.0512e+08	9.55429e+08	8.94079e+08	9.53657e+08	8.81335e+08	8.70877e+08	9.44185e+08	9.63543e+08	8.88555e+08	8.8645e+08	8.97437e+08	9.09382e+08	9.65042e+08	9.23293e+08	920132815	9.40443e+08	878670770	8.97353e+08	1021869487	9.01024e+08	1020330515	6.17573e+07	8.92144e+08	9.87926e+08	8.70076e+08	8.82526e+08	9.68843e+08	9.25669e+07	8.83513e+08	9.26325e+08	8.66216e+08	9.6864e+08	9.56324e+08	9.35632e+08
1-Propene-1,1,3,3-tetracarbonitrile@0.835-rp	5.71076e+06	8.69913e+06	7.77541e+06	6.52463e+06	6.92756e+06	7.73931e+06	8.44654e+06	7.27488e+06	6.5006e+06	7.21693e+06	6.56e+06	6.68811e+06	7.09285e+06	6.0591e+06	5.11933e+06	5.25894e+06	6.4032e+06	6.484e+06	5.48086e+06	7.22366e+06	6.08971e+06	5.70199e+06	6.71335e+06	600031	6.24122e+06	6.94443e+06	7.4205e+06	5.95453e+06	7.15143e+06	495995	7.13079e+06	8.40058e+06	8.40542e+06	9.71392e+06	6.13169e+06	7.47148e+06
508472@0.832-rp	2.28493e+06	3.50208e+06	3.13958e+06	2.72854e+06	2.9217e+06	3.16709e+06	3.27313e+06	2.89415e+06	2.52512e+06	3.00409e+06	2.69155e+06	2.65887e+06	2.89288e+06	2.52642e+06	2.07951e+06	2.42713e+06	2.78359e+06	2.60614e+06	2.23824e+06	2.9267e+06	2.32975e+06	2.40599e+06	2.83389e+06	244870	2.58031e+06	2.77443e+06	2.97729e+06	2.47519e+06	3.01107e+06	228187	2.81529e+06	3.28496e+06	3.45494e+06	4.10664e+06	2.6071e+06	3.02589e+06
2-Oxocyclohexanecarboxylicacid@10.824-rp	1.06939e+06	1.11576e+06	1.03417e+06	1.34085e+06	1.13674e+06	1.57702e+06	917647	1.65565e+06	1.19242e+06	1.42392e+06	1.2237e+06	943653	1.10759e+06	1.06938e+06	1.39074e+06	1.01668e+06	1.04766e+06	876332	1.3382e+06	1.20022e+06	1.10499e+06	1.08738e+06	1.04537e+06	203773	1.11007e+06	1.15988e+06	1.16291e+06	1.0607e+06	1.13664e+06	192665	1.48801e+06	1.08966e+06	889122	1.20616e+06	1.08698e+06	960931
Ectoine@1.136-rp	1.95484e+06	1.91672e+06	1.9881e+06	1.55776e+06	2.18596e+06	1.70381e+06	2.99906e+06	3.83731e+06	2.72592e+06	3.32306e+06	3.21416e+06	3.8624e+06	2.17039e+06	2.36117e+06	1.94629e+06	1.50412e+06	2.03841e+06	2.90833e+06	2.55976e+06	2.43059e+06	2.7255e+06	2.12581e+06	2.57601e+06	80318.2	2.50242e+06	2.35585e+06	2.67292e+06	2.44264e+06	2.47637e+06	59760	2.48953e+06	2.93181e+06	2.6099e+06	2.80855e+06	2.29325e+06	3.80024e+06
2-en-valproicacid@9.845-rp	1348431833	1519683716	1340149223	1986958063	1497965744	1776271331	1169899914	1971751720	1422771541	1727398275	1226111344	1332153898	1254626395	1290802417	1493723084	1145234486	1351685027	1251698183	1461688919	1252008514	1308436107	1279813128	1309290777	2.3463e+07	1436911476	1484520228	1513855865	1491248464	1560976396	2.22293e+07	1925144911	1354548238	1224781062	1629754600	1516489823	1317333593
2-en-valproicacid@6.495-rp	1.19127e+06	816397	1.09064e+06	1.13266e+06	1.10055e+06	1.18205e+06	493522	1.12949e+06	945842	815576	958247	627950	656222	826202	1.41212e+06	1.04395e+06	679210	736848	956329	764026	707609	806173	909272	61264.8	979703	995152	927367	917260	862227	49672.6	1.369e+06	1.19638e+06	876493	1.07593e+06	1.18589e+06	896436
2-en-valproicacid@7.556-rp	5.42119e+06	1.01659e+07	5.53164e+06	1.02599e+07	6.82789e+06	8.85256e+06	9.06766e+06	1.17801e+07	7.45667e+06	1.01166e+07	6.76992e+06	1.0905e+07	9.91503e+06	9.32423e+06	7.85427e+06	5.39396e+06	9.21856e+06	8.24285e+06	9.86521e+06	8.89134e+06	8.83145e+06	8.06019e+06	7.86419e+06	64993.7	7.79321e+06	8.39083e+06	8.29947e+06	8.04678e+06	8.09385e+06	51801.4	7.0519e+06	5.49311e+06	5.24488e+06	7.33772e+06	4.75393e+06	6.01152e+06
2-en-valproicacid@8.113-rp	8.10194e+06	9.74566e+06	8.28904e+06	1.05326e+07	9.75112e+06	1.13912e+07	9.18626e+06	1.32592e+07	1.01501e+07	1.05778e+07	8.17593e+06	9.75871e+06	9.0491e+06	1.07451e+07	1.09432e+07	7.75769e+06	1.13793e+07	7.37823e+06	1.23178e+07	9.30428e+06	9.7954e+06	8.938e+06	8.64906e+06	78235.9	9.841e+06	1.00434e+07	9.89622e+06	9.22534e+06	9.53253e+06	54576.8	1.34244e+07	9.36555e+06	7.53936e+06	9.85064e+06	9.30903e+06	8.48744e+06
142.54434@9.844-rp	821685	775135	731318	940726	841042	890970	715411	975057	739293	885940	556254	828512	677213	720067	772436	680143	768688	781984	729485	687458	735562	653229	705795	20842.2	758249	677093	867595	623921	800501	18485.4	926540	768533	662883	811634	929855	882526
142.87526@1.149-rp	6.9352e+06	6.12689e+06	6.86279e+06	6.74844e+06	4.46196e+06	5.72743e+06	5.06529e+06	6.87685e+06	5.88704e+06	6.30714e+06	6.67072e+06	5.92842e+06	6.12263e+06	6.80492e+06	6.41403e+06	4.95555e+06	5.91385e+06	4.70856e+06	7.22825e+06	5.84754e+06	6.40086e+06	5.4685e+06	7.01889e+06	889010	6.08522e+06	6.47335e+06	6.22819e+06	6.61747e+06	5.30676e+06	769018	7.0206e+06	6.14951e+06	5.26862e+06	6.88986e+06	7.30868e+06	6.96126e+06
142.87528@1.026-rp	5.01307e+06	5.28208e+06	6.0993e+06	5.72786e+06	5.58873e+06	5.26735e+06	4.59209e+06	5.55557e+06	5.38221e+06	5.62971e+06	5.5422e+06	6.5865e+06	5.23886e+06	4.66038e+06	7.13094e+06	1.03481e+07	5.77759e+06	6.25746e+06	6.94928e+06	4.97604e+06	5444540	5.61629e+06	5.83516e+06	519901	6.68413e+06	5.25718e+06	5.34675e+06	5.54086e+06	5.67954e+06	61985.2	5.3067e+06	5.3086e+06	5.53785e+06	5.74783e+06	6.06012e+06	6.049e+06
143.02503@0.837-rp	3.47016e+07	4.63737e+07	2.71234e+07	4.55145e+06	4.4651e+07	5.29234e+06	6.28412e+06	2.77496e+07	2.37387e+07	3.58439e+07	3.47979e+07	3.7657e+07	3.12102e+07	2.40714e+07	2.44182e+07	2.59343e+07	2.59106e+07	3.50858e+07	2.61953e+07	3.53673e+07	4.3518e+06	3.31791e+07	4.66577e+06	374445	3.09121e+07	3.22262e+07	2.96389e+07	3.2788e+07	3.38794e+07	321835	2.7025e+07	2.54169e+07	3.59784e+07	3.58693e+07	2.46576e+07	3.25111e+07
1-naphthylamine@4.628-rp	429646	597772	239015	439028	573150	505797	657597	711454	769504	581525	720270	808044	484501	433646	542136	450683	842122	868966	880579	917520	911022	486858	741772	33158.7	611036	654342	623250	560806	742622	34287	579686	708851	215953	424315	364997	869579
1-naphthylamine@3.057-rp	2.18941e+07	25239320	1.77393e+07	2.37946e+07	18588952	1.69937e+07	1.5113e+07	2.05066e+07	1.44876e+07	1.21034e+07	1.09317e+07	1.98726e+07	1.51495e+07	1.45563e+07	1.27889e+07	1.54939e+07	1.68856e+07	1.8575e+07	1.70154e+07	1.83276e+07	1.83703e+07	1.55608e+07	1.79305e+07	43197.8	1.64049e+07	1.70033e+07	1.69935e+07	1.6228e+07	1.56363e+07	46471.6	1.5971e+07	1.76372e+07	1.19767e+07	2.1576e+07	8.96478e+06	1.82264e+07
Homocycloleucine@1.227-rp	4.60023e+06	5.73423e+06	7.61863e+06	4.11951e+06	5.2306e+06	5.32976e+06	5.53114e+06	6.26907e+06	6.2061e+06	6.07406e+06	5.63319e+06	6.19013e+06	5.82202e+06	6.02823e+06	5.44364e+06	5.00015e+06	5.43176e+06	6.03515e+06	4.37452e+06	4.98349e+06	5.82848e+06	4.33585e+06	4.31996e+06	143122	5.0901e+06	5.52087e+06	5.45581e+06	4.45736e+06	5.45602e+06	138925	3.58067e+06	4.40767e+06	3.69942e+06	5.85148e+06	5.32637e+06	5.44935e+06
7-oxoheptanoicacid@7.639-rp	6.2946e+06	4.7235e+06	7.0999e+06	5.83915e+06	7.90729e+06	9.64394e+06	7.72297e+06	7.67469e+06	8.0324e+06	1.00033e+07	1.75272e+07	7.66295e+06	3.69706e+07	4.09515e+07	3.30671e+07	5.5053e+07	4.19801e+07	5.52928e+07	9.12175e+06	1.7366e+07	1.10295e+07	8.47187e+06	5.35865e+06	713692	1.39244e+07	1.32377e+07	1.56894e+07	1.40459e+07	1.59899e+07	417878	9.28635e+06	4.00443e+06	3.78547e+06	4.06865e+06	3.98324e+06	3.54693e+06
Valproicacid@9.844-rp	80584045	9.07222e+07	7.66861e+07	1.23649e+08	8.72835e+07	1.09499e+08	6.72691e+07	1.19307e+08	8.86386e+07	9.92368e+07	7.28805e+07	8.31805e+07	7.55426e+07	7.95898e+07	9.05358e+07	6.7006e+07	8.28545e+07	7.7212e+07	8.95105e+07	7.68642e+07	7.54065e+07	7.46449e+07	8.19559e+07	1.76226e+06	8.355e+07	8.30469e+07	8.9204e+07	9.37341e+07	9.84303e+07	1.15135e+06	123449664	8.60831e+07	7.62724e+07	9.80289e+07	9.18474e+07	7.57178e+07
144.87234@1.144-rp	3.95807e+06	4.11455e+06	4.06934e+06	3.43801e+06	2.00131e+06	2.03723e+06	2.04322e+06	4.03758e+06	3.42037e+06	4.23411e+06	3.89912e+06	3.68485e+06	3.82441e+06	4.29136e+06	1.69533e+06	4.23585e+06	4.05274e+06	3.99826e+06	3.65823e+06	3.51171e+06	3.57948e+06	1.69515e+06	3.88294e+06	332026	4.1088e+06	3.37515e+06	3.90386e+06	2.63799e+06	4.11387e+06	263306	8.68267e+06	3.95091e+06	2.36708e+06	4.2106e+06	3.93959e+06	3.75776e+06
144.87237@1.027-rp	4.80563e+06	4.79227e+06	5.6245e+06	4.90185e+06	5.22421e+06	4.89273e+06	4.34818e+06	5.0657e+06	4.96931e+06	5.00175e+06	4.98126e+06	4.72472e+06	4.96503e+06	4.88998e+06	5.40862e+06	5.24508e+06	4.77098e+06	5.1914e+06	5.00868e+06	4.39399e+06	5.14291e+06	5.1952e+06	5.05364e+06	295610	4.88718e+06	4.73938e+06	4.8821e+06	4.93125e+06	5.38286e+06	52429.8	5.17252e+06	4.68621e+06	5.26316e+06	5.24843e+06	5.50488e+06	5.45344e+06
8-hydroxyquinoline@3.057-rp	3.43803e+07	3.95659e+07	2.79963e+07	3.46251e+07	2.93768e+07	2.6892e+07	2.37372e+07	3.16827e+07	2.29035e+07	2.0621e+07	1.69762e+07	3.1627e+07	2.34309e+07	2.29884e+07	20113907	2.48399e+07	2.63951e+07	3.23293e+07	2.71354e+07	2.70981e+07	2.75247e+07	2.43268e+07	2.62657e+07	29919.9	2.54794e+07	2.66256e+07	26276777	2.40895e+07	2.51311e+07	23366.8	2.85203e+07	2.81955e+07	1.90417e+07	3.47899e+07	1.37196e+07	2.9222e+07
8-hydroxyquinoline@7.573-rp	62050.5	120142	99085.5	102655	124815	131081	1.23175e+06	451179	700548	519383	1.54377e+06	1.55559e+06	289483	784439	475061	466023	804093	556550	899255	1.45136e+06	660011	1.04736e+06	1.07932e+06	20796.1	646155	622574	659046	553970	701702	19622.9	572538	993694	137873	194986	124775	363680
8-hydroxyquinoline@9.605-rp	3.86042e+06	5.78023e+06	1.73431e+06	2.37666e+06	4.44069e+06	5.58263e+06	1.03965e+06	1.46142e+06	1.34638e+06	1.75941e+06	2.90992e+06	1.80374e+06	1.44477e+06	1.39374e+06	1.77181e+06	2.13704e+06	4.20603e+06	2.36183e+06	1.65996e+06	1.87525e+06	2.02672e+06	2.06294e+06	3.48783e+06	55129.1	2.51761e+06	2.63468e+06	2.66696e+06	2.62968e+06	2.82032e+06	44777.4	4.24163e+06	3.7791e+06	3.66505e+06	3.04887e+06	2.06488e+06	2.90003e+06
2-amino-5-oxohexanoicacid@2.337-rp	411804	654694	712240	450214	579789	552106	708128	404514	817483	683005	666501	852459	621434	429389	492179	500664	716939	626487	663941	715838	481834	606564	893536	27749.9	653041	729266	654974	670633	757566	16463.7	1.0929e+06	867486	882885	950088	549471	1.00515e+06
4-guanidinobutanoicacid@1.176-rp	583814	631943	486344	701429	619657	481227	722617	808105	726059	666505	793241	913577	798130	671642	820262	1.31059e+06	1.24791e+06	924831	911930	1.05804e+06	1.33707e+06	854160	578873	49205.5	809977	828807	818236	762442	845065	40373.4	613982	426246	427720	449994	431516	590848
3-amino-4-methylhexanoicacid@1.07-rp	2.64878e+06	3.75816e+06	2.85997e+06	2.8217e+06	2.88315e+06	3.25466e+06	3.59063e+06	3.91683e+06	3.90268e+06	3.12503e+06	3.78533e+06	4.48462e+06	3.65636e+06	2.94509e+06	2.74218e+06	2.82927e+06	3.33429e+06	3.66164e+06	3.0979e+06	3.64212e+06	3.7274e+06	3.81208e+06	2.89673e+06	22091.8	2.8162e+06	3.11179e+06	3.41874e+06	3.05194e+06	3.4763e+06	66548.1	2.2329e+06	2.50139e+06	2.76904e+06	2.2598e+06	2.55045e+06	2.8784e+06
1,4-dichlorobenzene@11.096-rp	155007	268832	2.39278e+06	2.93766e+06	135467	407654	252531	819353	524675	574051	249917	397429	342544	648106	325518	977132	470115	684870	141784	628818	1.06975e+06	1.35239e+06	461401	82908.5	748144	832335	697713	766692	798718	122803	648722	795027	1.4971e+06	1.3646e+06	479106	280161
2-oxoglutaricacid@1.255-rp	4.83142e+06	6.39865e+06	6.23248e+06	4.63812e+06	5.51329e+06	5.85501e+06	4.35026e+06	2.84288e+06	4.75195e+06	3.79735e+06	4.99609e+06	5.16171e+06	2.99431e+06	3.78102e+06	2.10719e+06	2.69204e+06	3.3194e+06	4.05624e+06	4.43807e+06	4.798e+06	4.29992e+06	2.99715e+06	4.55671e+06	17312.2	3.8541e+06	4.12298e+06	4.46409e+06	4.05291e+06	4.15403e+06	18098.5	3.59852e+06	6.09774e+06	2.42258e+06	5.52481e+06	3.82748e+06	6.38492e+06
2-oxoglutaricacid@1.391-rp	5.6419e+07	8.09215e+07	7.22232e+07	6.6442e+07	7.27394e+07	8.19484e+07	7.12218e+07	5.93862e+07	6.69643e+07	7.34083e+07	5.66738e+07	5.78619e+07	5.71394e+07	5.08591e+07	4.81685e+07	3.91021e+07	5.26718e+07	4.84382e+07	5.44456e+07	6.84274e+07	5.84089e+07	6.23554e+07	7.3956e+07	1.66071e+06	5.85476e+07	7.12268e+07	6.59671e+07	6.03443e+07	6.28207e+07	163376	6.78422e+07	8.09495e+07	6.77672e+07	7.60689e+07	5.58381e+07	6.65551e+07
2,2-dimethylsuccinicacid@9.837-rp	1.41314e+06	1.80631e+06	1.5544e+06	2.1235e+06	1.65649e+06	2.28512e+06	1.51961e+06	2.49954e+06	1.76771e+06	2.11213e+06	1.55353e+06	1.53092e+06	1.49262e+06	1.72834e+06	1.99127e+06	1.63399e+06	1.88019e+06	1.5329e+06	1.93385e+06	1.58287e+06	1.5074e+06	1.63967e+06	1.62884e+06	105269	1.54191e+06	1.68433e+06	1.80885e+06	1.55271e+06	1.89972e+06	72488.4	2.02571e+06	1.64609e+06	1.35831e+06	1.68609e+06	1.61163e+06	1.48034e+06
2,2-dimethylsuccinicacid@3.889-rp	3.04268e+06	3.35597e+06	2.84208e+06	3.94673e+06	3.33652e+06	3.84178e+06	2.62863e+06	4.03756e+06	2.87361e+06	3.46602e+06	2.3227e+06	3.7952e+06	2.28875e+06	2.55115e+06	3.02164e+06	2.19133e+06	2.75481e+06	2.6624e+06	2.2665e+06	3.60791e+06	3.16952e+06	2.2939e+06	2.53306e+06	287777	3.62783e+06	3.81617e+06	3.54105e+06	3.5663e+06	3.60479e+06	337863	4.15514e+06	3.58367e+06	2.98964e+06	3.84021e+06	4.31725e+06	3.52545e+06
Alanylglycine@0.997-rp	2.54491e+08	2.55285e+08	2.05994e+08	2.22032e+08	2.08635e+08	208815657	2.36423e+08	2.90804e+08	2.50384e+08	2.59796e+08	2.19779e+08	3.22631e+08	2.81904e+08	2.62719e+08	2.3279e+08	2.46613e+08	272611873	242182507	2.14923e+08	2.30325e+08	237546995	2.55386e+08	2.50552e+08	286176	242878589	2.41332e+08	2.59979e+08	2.36949e+08	2.49697e+08	345219	243751905	2.51714e+08	2.72823e+08	3.80626e+08	2.73553e+08	2.46474e+08
n-Butyllactate@6.901-rp	372573	484309	478638	533984	402121	581298	413229	668357	493973	529497	344296	486759	476382	457715	490092	417119	486835	373569	588616	539337	412415	435608	452950	127926	588185	504434	524131	562026	548834	57108.9	558513	448254	364795	475749	516265	399562
3,5-diaminohexanoicacid@0.888-rp	1.01383e+08	1.42374e+08	1.09574e+08	1.15439e+08	9.50887e+07	8.44475e+07	1.28267e+08	1.24249e+08	1.10003e+08	9.90954e+07	93350808	1.42746e+08	8.71232e+07	8.76522e+07	8.18414e+07	9.36988e+07	1.11206e+08	1.16109e+08	9.98752e+07	1.26318e+08	9.27974e+07	9.37905e+07	9.3719e+07	2.46972e+06	9.52242e+07	1.0462e+08	108073239	9.15118e+07	1.02924e+08	1.73483e+06	7.97876e+07	9.52308e+07	8.43111e+07	8.62748e+07	8.6314e+07	9.39789e+07
146.99641@0.974-rp	2.48861e+07	2.90921e+07	15658501	2.78604e+07	2.90255e+07	2.37079e+07	2.14839e+07	1.59085e+07	1.48312e+07	2.26469e+07	2.33826e+07	2.81387e+07	2.18222e+07	1.66715e+07	1.3416e+07	1.53485e+07	1.7509e+07	2.54039e+07	16275180	2.43846e+07	2.38622e+07	2.00035e+07	1.89562e+07	44331	2.03481e+07	1.97006e+07	2.18913e+07	2.04066e+07	1.86144e+07	47798.1	1.70028e+07	1.46442e+07	1.87696e+07	2.22159e+07	1.62934e+07	2.36273e+07
2-oxo-4-hydroxy-5-aminovalericacid@1.003-rp	9.85586e+06	1.94363e+07	7.77565e+06	1.01251e+07	1.26703e+07	1.40809e+07	9.88784e+06	7.89136e+06	8.07458e+06	1.01988e+07	1.03045e+07	1.37256e+07	9.78622e+06	6.07105e+06	8.01731e+06	7.47836e+06	8.03815e+06	1.11996e+07	6.80484e+06	1.16198e+07	1.278e+07	8.45191e+06	1.00301e+07	968252	9.26289e+06	9.70642e+06	9.85714e+06	9.30885e+06	1.00345e+07	698237	9.32081e+06	6.86197e+06	1.13122e+07	1.17215e+07	9.88178e+06	1.16483e+07
2-oxo-4-hydroxy-5-aminovalericacid@1.266-rp	8.70826e+06	3.03054e+06	1.69731e+07	19350358	2.6406e+06	1.6212e+07	2.52655e+06	1.71941e+07	2.15143e+06	2.24789e+07	9.67723e+06	1.10316e+07	9.11721e+06	8.52631e+06	8.85969e+06	8.3683e+06	2.15823e+07	8.53269e+06	7.87742e+06	2.61063e+06	9.53318e+06	9.06412e+06	9.85676e+06	1.87405e+06	1.71054e+07	1.88679e+07	1.78506e+07	1.67147e+07	1.80222e+07	1.87593e+06	2.20039e+07	1.22613e+07	1.1207e+07	1.44644e+07	9.59168e+06	1.07892e+07
Indole-3-methanol@7.579-rp	36302.1	52575.3	47544.8	48914.2	68486.8	62992.3	695664	238142	371720	236328	956854	867586	137500	500631	267973	246341	450449	297247	523728	894254	335891	602347	610134	17212.7	336824	348535	317580	338986	357048	16181.7	347550	509094	81206.5	129562	69608.3	198759
N-hydroxyisoleucine@1.298-rp	8.03528e+06	9.33571e+06	8.19478e+06	6.80804e+06	8.36842e+06	8.60415e+06	8.06073e+06	9.44465e+06	9.17217e+06	7.91056e+06	8.17347e+06	9.20605e+06	7.81493e+06	8.35382e+06	7.11055e+06	7.16759e+06	8.84315e+06	8.69977e+06	8.28049e+06	8.90644e+06	8.34718e+06	7.51076e+06	7.93399e+06	104006	7.93414e+06	7.56601e+06	7.84774e+06	6.83128e+06	7.50045e+06	97267.3	7.71767e+06	7.53239e+06	5.42648e+06	8.03805e+06	5.64459e+06	7.77914e+06
N-hydroxyisoleucine@1.136-rp	1.62607e+06	1.62067e+06	1.39464e+06	1.62558e+06	1.62307e+06	1.61612e+06	1.50662e+06	1.84909e+06	1.83717e+06	1.56008e+06	1.81026e+06	1.88555e+06	1.64688e+06	1.73107e+06	1.62673e+06	1.38323e+06	1.61619e+06	2.41419e+06	1.86316e+06	1.76068e+06	1.57639e+06	1.82833e+06	1.53586e+06	18728.3	1.53225e+06	1.58599e+06	1.43292e+06	1.43111e+06	1.6111e+06	19039.4	1.40851e+06	1.40298e+06	1.20111e+06	1.3025e+06	1.31671e+06	1.48676e+06
147.99028@1.25-rp	8.29195e+06	7.60655e+06	7.80585e+06	7.63332e+06	9.38882e+06	8.38877e+06	7.61751e+06	7.98061e+06	7.2832e+06	7.94223e+06	8.94106e+06	8.8728e+06	8.81299e+06	8.37335e+06	8.36428e+06	9.12072e+06	8.37241e+06	8.57113e+06	7.4724e+06	8.68099e+06	8.28025e+06	7.34351e+06	6.97952e+06	70448	7.51869e+06	8.49785e+06	8.26533e+06	8.32826e+06	8.5147e+06	45694.1	8.4771e+06	7.37541e+06	7.74696e+06	9.01498e+06	8.6318e+06	8.45783e+06
2-dehydro-3-deoxyarabinonicacid@1.422-rp	1.28632e+07	1.61035e+07	1.3735e+07	1.58232e+07	1.6483e+07	1.8668e+07	1.38731e+07	2.0461e+07	1.61814e+07	1.65001e+07	1.38177e+07	1.57445e+07	1.44297e+07	1.45235e+07	1.56643e+07	1.21214e+07	1.47923e+07	1.20161e+07	1.594e+07	1.53075e+07	1.61092e+07	1.48694e+07	1.33811e+07	330390	1.29374e+07	1.56247e+07	1.61257e+07	1.39382e+07	1.54586e+07	107797	1.80463e+07	1.45182e+07	1.18094e+07	1.45591e+07	1.299e+07	1.45177e+07
3-hydroxy-1-indanone@1.895-rp	1.05271e+08	1.54513e+08	9.81836e+07	1.18973e+08	1.27636e+08	1.17469e+08	109137134	1.37628e+08	1.24289e+08	1.05333e+08	1.11882e+08	1.38012e+08	8.98916e+07	1.15855e+08	1.04089e+08	1.06775e+08	1.25906e+08	1.16395e+08	104363718	1.28632e+08	1.12562e+08	9.44572e+07	114820252	653637	1.11931e+08	121590614	1.15435e+08	9.75713e+07	1.09856e+08	368286	1.05e+08	1.08854e+08	8.35685e+07	1.07802e+08	7.80774e+07	1.11584e+08
149.00627@0.969-rp	1.50015e+07	1.8239e+07	1.49721e+07	1.36888e+07	1.30143e+07	1.32294e+07	1.81465e+07	1.86242e+07	1.7087e+07	1.64475e+07	1.72483e+07	2.28224e+07	1.93407e+07	1.93674e+07	1.46793e+07	1.72385e+07	2.03338e+07	2.0688e+07	1.41667e+07	1.5936e+07	1.39363e+07	1.63042e+07	1.51813e+07	20890.3	1.73116e+07	1.5076e+07	1.64095e+07	1.55889e+07	1.57056e+07	20234	16237078	1.69856e+07	1.66891e+07	1.77173e+07	1.84368e+07	1.49927e+07
Methionine@1.207-rp	5.27694e+06	7.05787e+06	7.19251e+06	5.96021e+06	5.44514e+06	5.45514e+06	6.89353e+06	1.05947e+07	6.66969e+06	7.19068e+06	7.41702e+06	8.73087e+06	5.51216e+06	6.21959e+06	6.09044e+06	6.43424e+06	8.10724e+06	8.95941e+06	8.03519e+06	8.15625e+06	5.57601e+06	6.42324e+06	6.32067e+06	50687.3	6.43128e+06	6.75996e+06	6.63433e+06	6.61634e+06	6.0078e+06	17032.7	5.13595e+06	6.49697e+06	4.56097e+06	5.9529e+06	4.3019e+06	7.0083e+06
150.04029@0.985-rp	2.32688e+06	2.58588e+06	2.25909e+06	1.86185e+06	1.82849e+06	2.30416e+06	2.47162e+06	2.83258e+06	2.71087e+06	2.82324e+06	2.49647e+06	3.42219e+06	2.95802e+06	3.09825e+06	2.29566e+06	2.33973e+06	2.63644e+06	2.5202e+06	1.87379e+06	2.39828e+06	2.13218e+06	2.42056e+06	2.0173e+06	21129.7	2.54178e+06	2.36255e+06	2.46043e+06	2.42835e+06	2.52957e+06	22782.2	2.72693e+06	3.18085e+06	3.31467e+06	2.71217e+06	2.95843e+06	2.3025e+06
Arabinose@1.099-rp	1.59422e+06	2.85614e+06	2.07327e+06	2.3056e+06	2.54356e+06	2.98454e+06	1.18494e+06	1.81653e+06	1.736e+06	1.56013e+06	1.96107e+06	1.87693e+06	1.87229e+06	1.35667e+06	1.41558e+06	1.52601e+06	2.48688e+06	1.81322e+06	1.55114e+06	2.35706e+06	1.99714e+06	1.81012e+06	2.23436e+06	38211.5	1.95739e+06	2.03254e+06	2.02554e+06	1.89261e+06	2.37002e+06	31880.9	2.99787e+06	2.78877e+06	1.89121e+06	2.70137e+06	2.04751e+06	2.44783e+06
3-methoxyacetophenone@7.557-rp	4.13716e+06	7.61979e+06	4.54605e+06	8.21868e+06	5.20307e+06	7.38446e+06	7.85027e+06	9.78325e+06	5.60571e+06	8.13544e+06	5.00662e+06	8.37959e+06	7.06039e+06	7.05277e+06	5.96194e+06	4.32604e+06	7.13701e+06	6.65192e+06	7.22431e+06	7.35632e+06	6.89688e+06	6.03538e+06	5.57476e+06	188341	6.55243e+06	6.52319e+06	6.15367e+06	5.58106e+06	5.97568e+06	156095	5.25908e+06	4.09761e+06	4.70198e+06	5.73851e+06	3.82814e+06	4.64953e+06
3-methoxyacetophenone@8.114-rp	1.98139e+06	2.98135e+06	2.52309e+06	3.32584e+06	2.87706e+06	2.56567e+06	2.54441e+06	3.54014e+06	2.67635e+06	3.09855e+06	2.17959e+06	2.74352e+06	2.53977e+06	2.58529e+06	2.86569e+06	2.4817e+06	2.83675e+06	2.10155e+06	2.34105e+06	2.03506e+06	2.69538e+06	2.00863e+06	1.94193e+06	215483	2.56838e+06	2.21184e+06	2.77055e+06	2.42994e+06	2.62432e+06	234215	3.15378e+06	2.57813e+06	2.06534e+06	2.47156e+06	2.65453e+06	2.27944e+06
3-methoxyacetophenone@10.523-rp	122025	149489	99334.4	170541	108132	153485	173389	188370	238848	239278	284457	253704	135037	134349	166119	136823	170776	178599	182589	232607	274747	177694	169086	67325.3	1.03548e+06	1.21157e+06	1.11109e+06	1.05404e+06	1.09052e+06	68752.7	6.43841e+06	4.51642e+06	2.83379e+06	3.41635e+06	5.17207e+06	5.95693e+06
151.00161@1.755-rp	6.4648e+07	7.54807e+07	7.01442e+07	8.07905e+07	7.81434e+07	7.25412e+07	3.52178e+07	6.80162e+07	5.07038e+07	5.62227e+07	6.26811e+07	5.10506e+07	5.11543e+07	3.28834e+07	2.80671e+07	1.96987e+07	5.55136e+07	4.73958e+07	3.56384e+07	6.70332e+07	6.9656e+07	4.96549e+07	5.47738e+07	438859	5.65749e+07	5.50774e+07	6.08621e+07	5.46593e+07	5.79348e+07	463165	7.9926e+07	6.30142e+07	7.21415e+07	8.17775e+07	5.03564e+07	7.29045e+07
Guanine@2.616-rp	39046.7	80268.9	1.27657e+06	1.25763e+06	71906.9	267037	19312.3	2.02948e+06	142264	142002	18739.9	19388.7	18711	30600.9	560078	163584	18767.9	22101.3	547727	1.464e+06	295180	73669	34519.8	21775.6	411988	421177	381692	339496	374340	18187.3	631383	1.07521e+06	126360	766552	88146.6	510660
2-amino-3-methylbenzoicacid@4.98-rp	70307.5	70887.4	29608	59551.3	54233.9	72639.1	70833.1	34689.7	105957	52297.2	33730.1	72873.6	63231.6	68536.2	71436.4	52440.4	53228.9	52241.7	92430.5	65513.4	68173	48149.2	46010.1	64562.4	57005.8	77977.8	91019	70997.1	77760.4	86072.8	87071.4	63341.7	73953.3	52281	84675.4	57266.2
2-amino-3-methylbenzoicacid@1.45-rp	1.05369e+06	1.87593e+06	1.3012e+06	1.17208e+06	1.27627e+06	1.56294e+06	1.75096e+06	1.32719e+06	1.4964e+06	955972	1.28205e+06	1.84886e+06	754097	973683	975161	895178	1.4679e+06	1.3177e+06	1.53676e+06	1.5331e+06	1.04633e+06	1.31313e+06	1.44001e+06	20291.9	1.2776e+06	1.23175e+06	1.22422e+06	1.11773e+06	1.13932e+06	20574.9	1.16979e+06	1.25509e+06	763944	1.33135e+06	663867	1.37207e+06
151.5496@9.844-rp	691742	849194	848433	1.06761e+06	766917	956282	699615	1.04169e+06	732489	1.04994e+06	680761	957844	612295	732697	792764	581682	925983	710313	796212	807368	737932	791125	824772	19462.9	703027	779667	773397	798463	866866	16467.4	929337	783212	781908	971536	852044	799402
151.89382@0.985-rp	8.62414e+06	1.01943e+07	9.70539e+06	7.85249e+06	1.1398e+07	1.00421e+07	1.21431e+07	1.18549e+07	1.23851e+07	1.04882e+07	9.25231e+06	8.55878e+06	1.221e+07	1.10503e+07	1.19654e+07	9.79187e+06	1.03853e+07	9.8489e+06	7.9864e+06	1.17062e+07	8.97365e+06	9.61807e+06	1.01997e+07	9679.34	9.02739e+06	1.12021e+07	1.07757e+07	9.71542e+06	1.026e+07	9148.86	1.12749e+07	1.02417e+07	9.10885e+06	1.05043e+07	9.13972e+06	1.12274e+07
152.03328@3.246-rp	251959	691309	358396	400184	433719	849054	129677	396034	158025	176911	188636	277041	90758.4	75640	61625.7	45545.8	202545	131333	142011	199075	141225	93918.5	248423	25458.8	274472	311240	282034	276328	272079	22528.3	683583	444673	384831	680638	151353	384418
Alloxanthine@2.391-rp	319230	1.05878e+08	3.77051e+07	3.59572e+07	5.70317e+07	1.35564e+08	139786	2.53155e+07	443638	1.88743e+06	2.03088e+06	324337	260085	275461	1.57539e+06	427982	646375	144303	1.99493e+06	4.89483e+07	2.29027e+07	3.18596e+06	1.96976e+07	34252.7	3.01042e+07	3.13234e+07	3.16505e+07	3.17698e+07	3.23894e+07	44421.5	1.18077e+08	8.18819e+07	3.14098e+07	1.09893e+08	574149	4.85549e+07
2-amino-4-nitrotoluene@3.551-rp	4.96929e+06	6.16319e+06	6.24652e+06	5.69445e+06	5.02865e+06	4.94773e+06	4.51095e+06	7.16932e+06	5.67159e+06	6.53227e+06	4.50529e+06	7.24432e+06	5.34528e+06	6.56065e+06	5.37138e+06	4.79425e+06	6.7392e+06	6.07522e+06	5.74407e+06	5.47314e+06	4.10533e+06	7.97723e+06	7.63637e+06	27199.6	5.60665e+06	5.83747e+06	5.77476e+06	5.11741e+06	5.90948e+06	22976.5	4.0246e+06	5.42045e+06	4.57507e+06	4.83729e+06	5.78153e+06	4.84315e+06
2-amino-4-nitrotoluene@4.4-rp	1.77466e+06	2.21963e+06	2.21582e+06	2.17258e+06	1.75412e+06	1.54467e+06	1.58312e+06	2.65063e+06	2.16053e+06	2.19011e+06	1.64187e+06	2.60182e+06	1.8629e+06	2.29007e+06	1.99224e+06	1.68908e+06	2.47387e+06	1.92436e+06	2.031e+06	1.85822e+06	1.49685e+06	2.59509e+06	2.62322e+06	57070.8	1.93805e+06	2.07461e+06	1.98311e+06	1.75811e+06	2.13385e+06	31002.5	1.51596e+06	1.99086e+06	1.82508e+06	1.67033e+06	2.20763e+06	1.82676e+06
152.07699@0.97-rp	1.42452e+07	1.69171e+07	1.46188e+07	1.35589e+07	1.1641e+07	1.38074e+07	1.79054e+07	2.01521e+07	1.80451e+07	1.7383e+07	1.74113e+07	2.31362e+07	1.94395e+07	2.02752e+07	1.55307e+07	1.70353e+07	1.95678e+07	2.01933e+07	1.40626e+07	1.55657e+07	1.37717e+07	1.66526e+07	1.48853e+07	29534.1	1.73505e+07	1.49898e+07	1.65764e+07	1.55795e+07	1.53147e+07	40981.8	1.75554e+07	1.76867e+07	1.73227e+07	1.77383e+07	1.97022e+07	1.58672e+07
4-ethylguaiacol@9.845-rp	9.8341e+06	1.10306e+07	1.02212e+07	1.37451e+07	1.0354e+07	1.3026e+07	9.29587e+06	1.37102e+07	1.05234e+07	1.26505e+07	8.38179e+06	1.05935e+07	8.49098e+06	9.9085e+06	1.06639e+07	8.39332e+06	1.09009e+07	9.44096e+06	9.87214e+06	9.5288e+06	9.40053e+06	9.24386e+06	9.05477e+06	911597	1.02589e+07	1.01577e+07	1.12488e+07	9.75948e+06	1.14658e+07	754416	1.43578e+07	1.03205e+07	9.40262e+06	1.20421e+07	1.13301e+07	1.00483e+07
152.11323@0.917-rp	2.42324e+07	3.60428e+07	2.61695e+07	2.68349e+07	2.52551e+07	2.15267e+07	3.16252e+07	3.14332e+07	26705568	2.43375e+07	2.41868e+07	3.45772e+07	2.30035e+07	2.13165e+07	2.04919e+07	2.31209e+07	2.86933e+07	2.83447e+07	2.38792e+07	2.97974e+07	2.25462e+07	2.3651e+07	2.35357e+07	100503	2.40243e+07	2.48189e+07	2.58174e+07	2.36523e+07	2.49192e+07	68173.8	1.96335e+07	2.35766e+07	2.10079e+07	2.25712e+07	1.96928e+07	2.28146e+07
2-methyl-5-isopropylhexadienal@12.165-rp	2.83594e+06	3.85906e+06	3.08277e+06	4.27318e+06	3.84597e+06	4.20892e+06	2.90255e+06	4.83313e+06	3.64111e+06	4.03155e+06	2.71949e+06	3.53245e+06	2.99401e+06	3.4526e+06	3.84259e+06	3.07797e+06	3.23344e+06	2.78884e+06	3.57382e+06	3.23396e+06	3.33243e+06	3.14674e+06	3.28715e+06	794522	3.53417e+06	3.39058e+06	3.52021e+06	2.96385e+06	3.70699e+06	732872	4.40208e+06	3.4735e+06	3.18617e+06	3.64142e+06	3.31698e+06	3.26886e+06
153.01723@2.392-rp	18475.2	2.09027e+06	637404	664523	1.18194e+06	2.38643e+06	22781.5	455934	19012.7	23288.3	19034.7	22850.7	17784.8	17572.5	18073.8	18118.7	19785.8	17001.7	26287.2	947737	389407	49083.3	339486	19903	546975	546144	616372	493836	547787	16967.9	2.21479e+06	1.55434e+06	587851	1.96476e+06	17265.2	875226
3-hydroxy-2-methylpyridine-5-carboxylicacid@4.395-rp	985175	1.5157e+06	1.52791e+06	1.35203e+06	952649	1.0814e+06	887347	1.54826e+06	1.25181e+06	1.17987e+06	965591	1.54393e+06	1.14765e+06	1.73733e+06	1.11124e+06	1.12808e+06	1.55528e+06	1.20862e+06	1.38398e+06	1.25852e+06	950829	1.56434e+06	1.61173e+06	103197	1.35051e+06	1.30254e+06	1.25293e+06	978957	1.24257e+06	89704.9	914356	1.3183e+06	1.20728e+06	1.44425e+06	1.20707e+06	1.06332e+06
153.05562@1.097-rp	484788	578826	314140	601204	575167	535724	344998	583969	349838	388452	574056	429543	235421	219844	256408	332796	322756	267993	262515	284378	309600	248138	218301	12345.2	303632	314613	319425	328350	315740	11739.6	183788	234548	175097	267008	350979	277224
153.89091@0.985-rp	8.50176e+06	8.37804e+06	8.40858e+06	5.95932e+06	8.59387e+06	7.84506e+06	9.29093e+06	9.34593e+06	9.60399e+06	8.71014e+06	7.56236e+06	9.4589e+06	9.38143e+06	7.8778e+06	9.52517e+06	8.74741e+06	8.28985e+06	7.69138e+06	1.12837e+07	8.83943e+06	8.54282e+06	7.39813e+06	9.09663e+06	9776.05	1.27079e+07	8.96801e+06	7.87148e+06	7.95592e+06	9.27659e+06	9240.27	8.98594e+06	8.75066e+06	7.38253e+06	8.48707e+06	7.57426e+06	9.18915e+06
Propionylphosphate@1.089-rp	3.58209e+06	5.00015e+06	3.77946e+06	4.58632e+06	3.92312e+06	4.02122e+06	4.17204e+06	3.44771e+06	3.56352e+06	3.67107e+06	3.40534e+06	4.37559e+06	2.84178e+06	2.92453e+06	2.60558e+06	2.68045e+06	3.11289e+06	4.04102e+06	3.11052e+06	4.02948e+06	3.84152e+06	3.51244e+06	3.25817e+06	32788.7	3.66442e+06	3.85911e+06	3.36434e+06	3.59575e+06	3.78773e+06	32227.6	3.70225e+06	3.76722e+06	3.90388e+06	4.3294e+06	3.87716e+06	4.98893e+06
154.0355@0.967-rp	1.78241e+06	2.26094e+06	2.1303e+06	2.17632e+06	1.67214e+06	1.77431e+06	2.4253e+06	2.29607e+06	1.76473e+06	1.6136e+06	1.88748e+06	3.12189e+06	2.11756e+06	2.05413e+06	1.63533e+06	2.39016e+06	2.53171e+06	2.7295e+06	1.89408e+06	2.52128e+06	1.8386e+06	2.05e+06	2.17028e+06	21269.2	1.95408e+06	1.80701e+06	1.99633e+06	2.08834e+06	1.90607e+06	18006.3	1.39228e+06	1.5686e+06	1.68161e+06	1.85539e+06	1.52452e+06	1.71692e+06
154.05226@9.845-rp	698954	821895	799348	910410	685599	911092	667453	922748	685033	965263	590160	739062	589195	714756	706490	673399	692490	744901	700575	599116	568418	566670	612901	20479.2	734445	689494	838928	625911	781616	18163.5	894178	691985	727138	826300	1.01744e+06	739758
Hydroxytyrosol@6.359-rp	2.80019e+06	3.21202e+06	3.22051e+06	3.69833e+06	3.32373e+06	3.98826e+06	2.80127e+06	4.33812e+06	3.14076e+06	3.92251e+06	2.95878e+06	3.25711e+06	3.40325e+06	3.12081e+06	3.53586e+06	2.90533e+06	3.42872e+06	2.68181e+06	3.69801e+06	3.3539e+06	3.49067e+06	3.20584e+06	2.7988e+06	661000	3.20037e+06	3.2282e+06	3.6312e+06	2.97044e+06	3.27796e+06	448242	3.88311e+06	3.18507e+06	2.59135e+06	3.29821e+06	3.15527e+06	3.10845e+06
154.07158@0.915-rp	4.88948e+06	8.71736e+06	5.21598e+06	6.64187e+06	5.42809e+06	4.70187e+06	8.42925e+06	7.73771e+06	6.7051e+06	6.78138e+06	5.71833e+06	1.47796e+07	4.96224e+06	4.79416e+06	4.68712e+06	4.92363e+06	6.49405e+06	1.15959e+07	6.34237e+06	6.76727e+06	6.27899e+06	4.93205e+06	5.46469e+06	1.1176e+06	6.49593e+06	6.64601e+06	6.56276e+06	5.9134e+06	6.38868e+06	425249	4.8894e+06	5.62796e+06	4.85851e+06	5.16636e+06	4.08461e+06	5.71843e+06
N,N?-Methylenebisacrylamide@2.634-rp	388026	840249	347146	369497	481885	401292	797954	744493	796670	832020	531729	759621	453436	329598	494355	328152	506311	762146	729684	754689	754676	247858	514508	24646.6	481642	549796	564914	525167	539521	21909.3	515271	492069	203776	292391	337418	722078
154.09812@0.929-rp	1.8726e+06	1.7618e+06	1.92188e+06	1.81673e+06	1.64524e+06	1.76992e+06	1.86462e+06	1.85651e+06	1.5661e+06	1.62495e+06	1.41095e+06	1.58515e+06	1.94265e+06	1.69612e+06	1.6118e+06	1.36e+06	1.77182e+06	2.04418e+06	1.77162e+06	1.98213e+06	1.66048e+06	1.31326e+06	1.61894e+06	109011	1.69171e+06	1.79913e+06	1.65797e+06	1.29541e+06	1.49407e+06	96521.8	1.64064e+06	1.77259e+06	1.44093e+06	1.36938e+06	1.54816e+06	1.6623e+06
1,8-cineole@12.165-rp	759744	823648	678264	1.0843e+06	852154	1.06431e+06	550935	1.18179e+06	879261	906002	662782	726575	710581	764340	777953	588057	741761	667435	844714	703765	754223	701111	709026	21440.4	850697	753453	855645	843269	760767	39904.1	1.01287e+06	767973	716476	862055	745839	794886
Histidine@0.96-rp	2.13395e+07	3.15358e+07	2.0463e+07	2.54027e+07	2.06452e+07	2.67221e+07	2.10717e+07	4.07873e+07	3.30111e+07	2.63749e+07	2.36147e+07	4.20152e+07	1.98317e+07	2.2736e+07	2.80996e+07	2.18876e+07	3.36777e+07	2.62127e+07	2.14812e+07	2.45438e+07	2.41208e+07	2.48073e+07	2.76581e+07	2.16668e+06	2.36035e+07	2.38317e+07	2.53615e+07	2.22802e+07	2.3505e+07	1.31613e+06	2.56256e+07	2.5821e+07	2.76983e+07	2.23331e+07	2.16086e+07	2.25466e+07
155.93544@1.071-rp	5.29018e+06	9.85761e+06	8.27592e+06	6.83142e+06	7.14e+06	8.31569e+06	6.86843e+06	3.52314e+06	8.94642e+06	7.96109e+06	1.00391e+07	7.07984e+06	9.05116e+06	8.0896e+06	7.33705e+06	8.30912e+06	8.37025e+06	7.22556e+06	6.3841e+06	7.87196e+06	7.45747e+06	7.71784e+06	4.62233e+06	47708.6	7.05825e+06	7.20721e+06	6.6276e+06	6.60518e+06	7.79777e+06	36017.1	5.15394e+06	6.01571e+06	4.54474e+06	3.30299e+06	5.72364e+06	4.58155e+06
155.97458@1.281-rp	2.82197e+06	2.38683e+06	1.90146e+06	2.66771e+06	2.76271e+06	2.67414e+06	2.81179e+06	2.39531e+06	2.55617e+06	2.59006e+06	2.97365e+06	3.28616e+06	2.68202e+06	2.56888e+06	2.69153e+06	2.81168e+06	2.60546e+06	2.84749e+06	1.86939e+06	2.88555e+06	2.60714e+06	2.65203e+06	2.30606e+06	54846	2.75197e+06	2.43958e+06	2.64017e+06	2.28262e+06	2.72939e+06	49822.4	2.57515e+06	2.05193e+06	2.19561e+06	2.32212e+06	3.08704e+06	2.65827e+06
2,5-Furandicarboxylicacid@1.395-rp	943441	2.15848e+06	2.02147e+06	1.3564e+06	1.79033e+06	2.2596e+06	1.12984e+06	1.15346e+06	1.05783e+06	1.71401e+06	1.31688e+06	1.1223e+06	1.13935e+06	990033	946746	927568	1.15226e+06	1.15445e+06	846689	1.28466e+06	1.39127e+06	1.17765e+06	2.3144e+06	89277.2	1.12257e+06	1.19859e+06	1.285e+06	1.09839e+06	1.41991e+06	49651.4	1.25943e+06	2.26504e+06	1.85975e+06	1.94595e+06	1.15593e+06	1.96212e+06
Oroticacid@1.447-rp	461538	465307	534209	494175	532542	638137	523949	316374	522171	319093	400738	331773	326149	332140	324417	406880	422211	352651	272765	382549	243460	297925	294868	12062	365035	438549	428465	368172	396621	12332.7	641641	614361	354036	503025	354288	524152
1-carboxy-2-(1H-imidazol-4-yl)ethanaminium@9.84-rp	2.96538e+06	4.44644e+06	3.2841e+06	4.60214e+06	3.75151e+06	4.78179e+06	3.24822e+06	5.35016e+06	3.66755e+06	5.59281e+06	3.17501e+06	3.66546e+06	3.33446e+06	3.99655e+06	3.96199e+06	3.86094e+06	4.38931e+06	3.15221e+06	4.45013e+06	3.75496e+06	3.5662e+06	3.34728e+06	3.55372e+06	17977.8	3.58927e+06	3.80936e+06	3.70144e+06	3.28105e+06	3.74952e+06	15210.9	4.45533e+06	3.55937e+06	2.899e+06	4.24832e+06	3.39067e+06	3.38102e+06
4-nonanolide@13.697-rp	1.17228e+06	1.80604e+06	1.46662e+06	2.0018e+06	1.21782e+06	1.70719e+06	1.27274e+06	2.14994e+06	1.38953e+06	1.87974e+06	1.36876e+06	1.73805e+06	1.39519e+06	1.46952e+06	1.79695e+06	1.44488e+06	1.46242e+06	1.03813e+06	1.36096e+06	1.75315e+06	1.62559e+06	1.23266e+06	1.1634e+06	104095	1.47672e+06	1.52197e+06	1.57932e+06	1.53191e+06	1.53705e+06	125283	1.8078e+06	1.5271e+06	991622	1.58336e+06	1.24844e+06	1.67696e+06
AMIDINOPROLINE@0.975-rp	6.58719e+07	9.85967e+07	6.51118e+07	8.72761e+07	7.22785e+07	6.36708e+07	8.00614e+07	7.58194e+07	7.39414e+07	6.4806e+07	6.47738e+07	1.11791e+08	5.79264e+07	5.89756e+07	5.45089e+07	6.92737e+07	7.98302e+07	8.61826e+07	6.26855e+07	8.51543e+07	6.16533e+07	5.39871e+07	5.98654e+07	923621	7.354e+07	6.65603e+07	7.51141e+07	6.66414e+07	6.43711e+07	564287	5.67273e+07	6.19224e+07	6.35114e+07	5.5366e+07	4.67484e+07	7.22228e+07
tranexamicacid@1.445-rp	612699	800034	701395	640973	697799	810281	393770	787032	436317	538363	620813	511712	288046	480845	310264	256019	478851	374022	400768	555788	475048	407548	391105	50141.1	611183	487167	611009	353849	513238	21228.7	401190	564429	354811	707232	484124	549922
157.99798@0.923-rp	5.16929e+06	8.73562e+06	4.66499e+06	5.1734e+06	6.6519e+06	6.59836e+06	5.50785e+06	5.33753e+06	5.35216e+06	6.48067e+06	6.38477e+06	6.90668e+06	5.63224e+06	4.93492e+06	5.92286e+06	5.46797e+06	6.03099e+06	7.05072e+06	5.16985e+06	9.39388e+06	7.82346e+06	5.7467e+06	7.87774e+06	1.39853e+06	6.26199e+06	6.8381e+06	5.96581e+06	6.35198e+06	6.79299e+06	1.29121e+06	6.08088e+06	5.605e+06	5.97161e+06	6.72107e+06	4.98712e+06	6.77727e+06
Allantoin@1.101-rp	2.20839e+07	31434893	2.42752e+07	2.47352e+07	2.48026e+07	2.66021e+07	3.3077e+07	3.02716e+07	3.10314e+07	3.32445e+07	3.72068e+07	4.11037e+07	2.15251e+07	3.03319e+07	2.25072e+07	2.33832e+07	3.19472e+07	3.30981e+07	3.18648e+07	3.31455e+07	2.64666e+07	3.71461e+07	3.20384e+07	113696	2.83186e+07	2.83217e+07	2.9338e+07	2.72849e+07	3.13839e+07	117248	3.01731e+07	3.81488e+07	2.27151e+07	3.56143e+07	2.42233e+07	2.77049e+07
2-isopropylmaleicacid@3.713-rp	2.28955e+06	3.00775e+06	2.64763e+06	3.27384e+06	3.34289e+06	3.63958e+06	2.22252e+06	4.87198e+06	2.65345e+06	4.27862e+06	2.24199e+06	2.92876e+06	2.48603e+06	2.73463e+06	3.15208e+06	2.5708e+06	2.64672e+06	2.33376e+06	3.2095e+06	4.04622e+06	2.67991e+06	2.45064e+06	2.67339e+06	291905	3.73189e+06	2.80198e+06	2.96497e+06	2.5019e+06	2.87256e+06	298270	3.44799e+06	2.60786e+06	2.20349e+06	2.82616e+06	2.55384e+06	2.42813e+06
2-isopropylmaleicacid@8.488-rp	406645	544714	417332	683409	444724	564167	496325	667112	472683	573066	378148	616788	533999	523652	611441	441435	460621	471600	593901	468228	537629	472266	452520	16350.7	459060	495559	480612	433515	486758	16152.6	395056	394514	351620	549678	343188	462950
1-benzylimidazole@8.972-rp	431993	823138	408640	563461	637237	572474	300841	285894	345891	211390	224710	246389	287404	336727	219850	234455	389055	334182	228104	374580	248551	343556	359348	22391.3	382285	374831	345218	332722	308213	19424.6	238012	311192	390497	404531	198911	290782
6-methoxyquinoline@1.859-rp	1.53041e+07	3.00451e+07	9.48918e+06	1.095e+07	2.94884e+07	2.12279e+07	1.31889e+07	1.36839e+07	3.98241e+06	1.82149e+07	2.79122e+07	2.63691e+07	2.9736e+07	3.35971e+06	8.82874e+06	3.05575e+06	3.19377e+06	2.05312e+07	9.1794e+06	4.6191e+07	4.74903e+07	2.19497e+07	2.08302e+07	45578.9	2.01544e+07	1.83781e+07	1.78928e+07	1.56312e+07	1.67458e+07	36599.1	7.45197e+06	3.81004e+06	3.35384e+07	2.99485e+07	3.58582e+06	3.5146e+07
6-methoxyquinoline@3.054-rp	2.11468e+06	2.4552e+06	1.51164e+06	2.20487e+06	1.71233e+06	1.76536e+06	1.41854e+06	1.74343e+06	1.38313e+06	986132	1.27042e+06	1.95234e+06	1.6103e+06	1.29037e+06	1.09915e+06	1.55477e+06	1.73292e+06	2.1218e+06	1.62524e+06	1.58276e+06	1.81255e+06	1.71987e+06	1.81189e+06	25478.9	1.68387e+06	1.68901e+06	1.42417e+06	1.71754e+06	1.66193e+06	24090.7	1.59394e+06	1.56267e+06	1.12887e+06	1.89681e+06	912720	2.02338e+06
3-dehydrocarnitine@4.047-rp	313380	710960	312274	374991	391846	371230	712011	465231	664239	580126	816117	662010	607716	533814	540762	439810	713093	679510	1.0244e+06	1.00197e+06	968081	1.59746e+06	1.07117e+06	26211.4	655847	743030	635187	606431	614302	25448.5	583999	802144	381723	362908	281900	701753
Pregabalin@1.214-rp	9.89734e+06	9.15228e+06	1.46499e+07	7.93e+06	1.35232e+07	9.18466e+06	1.19385e+07	9.67993e+06	8.27217e+06	1.24987e+07	1.19525e+07	1.98956e+07	7.97595e+06	7.73725e+06	1.047e+07	7.63102e+06	6.32706e+06	7.26019e+06	9.89071e+06	9.45484e+06	6.37702e+06	8.43723e+06	1.00386e+07	36290.5	1.20417e+07	1.16605e+07	1.17504e+07	1.00517e+07	1.09329e+07	29220.5	1.31655e+07	1.21203e+07	1.6493e+07	1.49303e+07	2.5463e+07	1.85108e+07
160.02198@0.841-rp	2.30847e+07	3.44802e+07	3.22591e+07	2.63604e+07	2.81714e+07	3.12635e+07	3.42034e+07	2.91061e+07	2.375e+07	2.95973e+07	2.47354e+07	2.74681e+07	2.75456e+07	2.49679e+07	2.12953e+07	2.10592e+07	2.41085e+07	2.53749e+07	2.27035e+07	2.9107e+07	2.3785e+07	2.3416e+07	2.82513e+07	2.46504e+06	2.58078e+07	2.74726e+07	2.92258e+07	2.42324e+07	2.80375e+07	2.02957e+06	2.86237e+07	3.45828e+07	3.34101e+07	3.8369e+07	2.47197e+07	3.21931e+07
2-formylglutaricacid@1.555-rp	503378	1.14681e+06	807639	807310	886607	1.12044e+06	621195	396378	561928	538456	507366	754450	331008	562435	331000	336601	529661	600888	470060	773762	579910	722759	723146	92826.9	677644	659685	654570	562888	639691	72166.3	959385	1.11002e+06	391638	1.14132e+06	443243	1.28864e+06
2,2-dimethylglutaricacid@10.819-rp	1.08775e+06	1.22766e+06	1.08661e+06	1.35512e+06	1.18223e+06	1.50996e+06	914173	1.5792e+06	1.21946e+06	1.49355e+06	1.14136e+06	1.03155e+06	1.05224e+06	1.16274e+06	1.3855e+06	1.11616e+06	1.16399e+06	891702	1.33752e+06	1.21829e+06	1.13135e+06	1.10053e+06	1.05655e+06	85570.1	1.1393e+06	1.19479e+06	1.26189e+06	1.08808e+06	1.21613e+06	74899.3	1.37671e+06	1.12278e+06	907510	1.23896e+06	1.12345e+06	970640
2,2-dimethylglutaricacid@6.707-rp	7.6215e+06	7.97403e+06	7.40698e+06	1.1339e+07	8.49306e+06	8.8865e+06	5.81697e+06	9.86475e+06	7.2866e+06	8.50379e+06	4.76668e+06	7.75525e+06	6.51242e+06	6.60824e+06	7.24993e+06	5.91883e+06	5.73308e+06	6.76071e+06	6.2637e+06	5.83239e+06	7.32597e+06	6.23839e+06	6.57454e+06	136469	7.34947e+06	7.87333e+06	8.01454e+06	6.88239e+06	7.45341e+06	100696	9.88319e+06	7.85967e+06	6.84626e+06	8.64452e+06	9.55588e+06	8.59084e+06
2,2-dimethylglutaricacid@8.712-rp	347772	520512	407010	558885	618321	628318	361498	735202	408889	569442	422402	573762	437770	431597	535248	424740	460869	383963	626913	451182	416076	584816	447483	89074.3	476210	454476	448647	632794	544543	73898.5	642829	373936	307412	422454	532602	385498
Anatabine@3.059-rp	953405	1.1917e+06	823883	969380	876769	851623	714654	952876	682502	545300	512096	998895	664651	642490	629726	752141	813960	935747	832303	830164	810521	703993	814295	18357.1	794214	878945	752744	781506	755527	17718.5	727047	783866	561342	1.05279e+06	409733	818459
3-hydroxyvalproicacid@8.706-rp	7.39904e+06	8.24555e+06	6.54825e+06	8.9841e+06	8.33612e+06	9.75504e+06	6.97399e+06	1.08904e+07	7.60689e+06	9.63914e+06	7.21594e+06	7.78173e+06	7.30046e+06	7.76453e+06	9.5327e+06	6.98867e+06	7.90189e+06	6.67982e+06	9.44305e+06	7.59576e+06	7.78705e+06	7.41344e+06	7.86295e+06	614299	7.73089e+06	8.71601e+06	8.1701e+06	7.97268e+06	8.1183e+06	174739	1.0412e+07	7.32256e+06	6.62648e+06	7.76456e+06	7.67748e+06	7.28863e+06
3-hydroxyvalproicacid@9.981-rp	817308	1.25775e+06	1.68864e+06	855589	1.75661e+06	1.50826e+06	1.13708e+06	512842	986504	997576	979199	530223	784645	1.02405e+06	976889	1.03253e+06	914298	1.02208e+06	702553	1.01125e+06	619600	1.0655e+06	1.0472e+06	149627	1.24593e+06	1.00982e+06	1.11605e+06	977025	1.03374e+06	164133	1.11925e+06	1.02901e+06	1.57399e+06	1.30393e+06	1.54793e+06	907087
3-hydroxyvalproicacid@8.286-rp	958612	1.25632e+06	1.19359e+06	1.09445e+06	1.04224e+06	1.40189e+06	1.17433e+06	1.44607e+06	1.08219e+06	1.28093e+06	814246	984096	1.25577e+06	1.0813e+06	1.14429e+06	971732	1.16376e+06	936823	1.21412e+06	1.14724e+06	1.17517e+06	1.24821e+06	1.11444e+06	216260	1.3148e+06	1.22717e+06	1.04931e+06	1.0323e+06	1.0719e+06	153114	1.44779e+06	932842	770590	1.02618e+06	1.06728e+06	1.12093e+06
N6-methyllysine@0.94-rp	2.60853e+06	3.37114e+06	2.98957e+06	2.70809e+06	3.023e+06	3.18846e+06	3.88742e+06	4.39098e+06	4.57514e+06	4.6923e+06	3.37663e+06	5.60188e+06	3.2076e+06	3.77119e+06	3.46204e+06	3.08537e+06	3.56693e+06	3.90823e+06	3.84383e+06	4.04051e+06	3.62243e+06	3.84759e+06	3.49238e+06	41230.9	3.52977e+06	3.38622e+06	3.67717e+06	3.15621e+06	3.65288e+06	37751.2	3.26579e+06	3.8995e+06	3.23838e+06	4.0023e+06	3.25008e+06	3.66385e+06
2,4-quinolinediol@6.542-rp	70884	108876	91447	119524	235018	112943	829747	261534	409142	315030	795997	746984	312185	608758	406842	350571	613348	436817	561627	1.03491e+06	463907	777952	649796	36611.3	376802	421440	423530	432267	381893	18963.8	349189	377453	122798	75770.2	90321.9	259167
2-aminoadipicacid@1.068-rp	1.03069e+06	1.2344e+06	1.15545e+06	1.37027e+06	1.3701e+06	1.36196e+06	1.13662e+06	1.05327e+06	941102	1.10242e+06	954478	1.08052e+06	1.32933e+06	1.10923e+06	997100	981340	1.43216e+06	1.24823e+06	894090	985799	1.08748e+06	1.05611e+06	876747	87578.8	1.07298e+06	1.0827e+06	1.0151e+06	906969	1.22974e+06	15099.5	916985	755553	794651	776438	740454	881990
2-aminoadipicacid@1.447-rp	895438	650029	861168	431270	722335	843244	327151	322990	408914	342530	508589	460813	389617	367825	330482	277797	460952	328371	321816	451557	336002	358094	378375	20084.6	360157	455946	391063	340560	471909	20097.4	334560	317965	430415	385132	329027	368060
Carnitine@1.004-rp	153686945	1.34244e+08	1.12271e+08	1.28086e+08	1.53854e+08	1.4185e+08	1.14678e+08	162274691	1.20367e+08	1.36648e+08	1.31237e+08	1.52309e+08	1.41535e+08	1.32612e+08	1.31376e+08	1.37737e+08	1.22851e+08	1.20145e+08	1.04619e+08	1.13912e+08	1.2694e+08	114438741	1.20484e+08	53542.6	1.17435e+08	1.24545e+08	1.20181e+08	1.29186e+08	1.20719e+08	44607.6	117272906	1.12804e+08	7.7159e+07	1.23708e+08	1.32679e+08	1.19747e+08
162.01961@0.841-rp	1.19203e+06	1.91322e+06	1.70363e+06	1.34379e+06	1.56362e+06	1.76848e+06	1.91558e+06	1.56568e+06	1.3279e+06	1.6636e+06	1.29269e+06	1.50283e+06	1.48883e+06	1.31226e+06	1.06239e+06	1.14564e+06	1.23728e+06	1.46923e+06	1.12597e+06	1.71683e+06	1.39427e+06	1.1698e+06	1.54644e+06	187076	1.43887e+06	1.42474e+06	1.65897e+06	1.22477e+06	1.40314e+06	72639.8	1.46874e+06	2.00444e+06	1.86399e+06	2.1537e+06	1.38148e+06	1.74777e+06
2,3-dimethylmalicacid@1.011-rp	1.02406e+07	1.16932e+07	1.51243e+07	9.78362e+06	1.12335e+07	1.4208e+07	1.38862e+07	1.24509e+07	1.48133e+07	1.49516e+07	1.2426e+07	1.40391e+07	11451407	1.40164e+07	1.58851e+07	1.80623e+07	9.50236e+06	1.43311e+07	1.42934e+07	1.66352e+07	9.97756e+06	1.33771e+07	1.74034e+07	289815	1.55521e+07	1.20705e+07	1.32869e+07	1.39039e+07	1.37504e+07	376862	1.55391e+07	1.52913e+07	1.06945e+07	1.51972e+07	1.10061e+07	1.59677e+07
2,3-dimethylmalicacid@1.712-rp	518823	773571	590558	561894	774126	710782	665675	561739	963302	646607	791350	695574	548372	488655	476222	584573	613003	1.01739e+06	518169	667668	682698	543242	539172	55605.7	894346	643126	712490	615564	759650	105418	887272	817348	666314	608440	618300	681625
162.96939@1.4-rp	1.10917e+06	1536957	1.44834e+06	1.0146e+06	1.29944e+06	1.47553e+06	1.60205e+06	1.34322e+06	1.41358e+06	1.63472e+06	1.44204e+06	1.37738e+06	1.0857e+06	1.12943e+06	1.23558e+06	1.09825e+06	1.06035e+06	1.18271e+06	1.10267e+06	1.253e+06	1.19264e+06	1.25195e+06	1.42182e+06	117063	1.28683e+06	1.16264e+06	1.28708e+06	1.21081e+06	1.28868e+06	63186.6	1.10541e+06	1.40006e+06	1.43677e+06	1.69994e+06	1.27419e+06	1.49903e+06
163.92259@0.943-rp	5.20595e+06	6.40773e+06	6.27855e+06	4.03926e+06	5.09915e+06	5.78968e+06	6.67526e+06	2.9622e+06	5.91459e+06	4.12127e+06	6.131e+06	4.76942e+06	5.18285e+06	5.15345e+06	5.29621e+06	6.58645e+06	5.62394e+06	6.3943e+06	3.56263e+06	5.26853e+06	5.53711e+06	5.88449e+06	2.98305e+06	422024	3.86541e+06	5.85081e+06	4.40904e+06	5.30041e+06	6.27175e+06	817387	3.7362e+06	3.89605e+06	3.10439e+06	3.02769e+06	4.16416e+06	3.03009e+06
1-Nitro-2-(2-nitroethoxy)ethane@0.831-rp	9.45579e+06	1.42641e+07	1.24597e+07	1.08769e+07	1.23915e+07	1.22842e+07	1.42954e+07	1.1808e+07	1.08298e+07	1.20807e+07	1.06091e+07	1.11062e+07	1.16976e+07	1.03195e+07	9.44268e+06	8.70412e+06	1.09028e+07	1.06244e+07	1.03023e+07	1.22526e+07	1.02872e+07	9.64735e+06	1.19006e+07	1.02101e+06	1.03003e+07	1.12695e+07	1.25393e+07	1.01025e+07	1.19207e+07	985592	1.20766e+07	1.38748e+07	1.4091e+07	1.60666e+07	1.01389e+07	1.32686e+07
2-hydroxy-3-phenylpropenoicacid@1.448-rp	9.82273e+07	1.78749e+08	1.22061e+08	1.3459e+08	130793442	1.37849e+08	1.55772e+08	1.31739e+08	124595279	9.04461e+07	1.16213e+08	1.7334e+08	6.7358e+07	9.08646e+07	8.65895e+07	8.72025e+07	1.32608e+08	1.20041e+08	1.26365e+08	1.41096e+08	100391933	1.08924e+08	1.24531e+08	622739	1.11683e+08	1.09972e+08	1.14772e+08	9.44618e+07	1.2372e+08	403416	9.80606e+07	1.22061e+08	7.37792e+07	1.32283e+08	65990644	1.21676e+08
2-hydroxy-3-phenylpropenoicacid@8.724-rp	626836	1.25821e+06	579659	1.02439e+06	935535	739920	852326	970546	678561	904468	989636	1.56171e+06	725078	597892	683282	532079	947608	1.12159e+06	946421	1.13358e+06	935890	565826	830727	68799.4	790334	818191	777360	825702	857336	37185.6	777917	743086	156370	433218	235440	1.3976e+06
MFCD00674100@12.289-rp	48939.2	37932.5	21684.3	1.10836e+06	32045	33354.1	39907	62348.4	80626.7	46720.3	31554.6	1.4533e+06	37347.9	30753.2	56519.6	22398.3	31134.2	21565.5	41400.3	29353.4	45646.5	20658.2	50754	39829.4	152454	171110	211559	158330	199595	20996.5	21275.9	35959.9	75942.9	3.32168e+06	64369.4	42358.1
4-hydroxypyridinyl-butanone@6.777-rp	306946	374398	322598	393085	359461	424565	309374	547181	345904	457381	319275	389013	395269	379827	454519	352397	349659	280461	407061	447934	412394	312456	347627	51804.7	374481	474955	388828	324475	402649	45117.2	406360	338785	314925	359747	317152	309275
4-hydroxypyridinyl-butanone@1.894-rp	5.48716e+07	8.0699e+07	4.92111e+07	6.64306e+07	6.3369e+07	6.53699e+07	6.00755e+07	6.91295e+07	6.7213e+07	5.6485e+07	5.84142e+07	7.13033e+07	5.2527e+07	6.91554e+07	5.76438e+07	5.77367e+07	7.49727e+07	6.37321e+07	6.41861e+07	6.84823e+07	5.72583e+07	4.85879e+07	6.20171e+07	221953	5.97901e+07	6.13683e+07	5.84602e+07	5.71879e+07	6.41544e+07	121823	5.66248e+07	5.52126e+07	4.51619e+07	5.74085e+07	4.20517e+07	6.24373e+07
Arabinonicacid@1.047-rp	1.70527e+06	2.32039e+06	1.7532e+06	2.00168e+06	2.49312e+06	2.06932e+06	1.4203e+06	1.40771e+06	1.73301e+06	1.84009e+06	1.6739e+06	2.36462e+06	1.86741e+06	1.82446e+06	1.35367e+06	2.09917e+06	2.10221e+06	2.21798e+06	1.56425e+06	2.12873e+06	2.47564e+06	2.09019e+06	2.71241e+06	133304	1.9209e+06	1.97027e+06	1.88132e+06	1.77093e+06	2.28545e+06	78492.8	1.42287e+06	2.37462e+06	1.69878e+06	1.63458e+06	1.85618e+06	1.98975e+06
2-methoxy-2-phenylaceticacid@7.052-rp	170605	227619	134979	203279	225970	198461	1.82175e+06	581404	2.51799e+06	566876	1.78581e+06	790096	900863	970936	1.54173e+06	1.12415e+06	1.41366e+06	1.27084e+06	1.86119e+06	2.77928e+06	2.09306e+06	1.11822e+06	1.13402e+06	27857.8	1.2096e+06	1.11805e+06	1.22099e+06	963175	1.16163e+06	45614.2	767546	1.68714e+06	181133	436713	447502	1.86715e+06
2-methoxy-2-phenylaceticacid@7.792-rp	73245.6	62554.9	47579.8	29617.3	32754	72575.5	2.49811e+06	2.2233e+06	3.14298e+06	1.85202e+06	4.18871e+06	4.07912e+06	941317	1.37925e+06	1.48444e+06	791747	1.58012e+06	1.04384e+06	2.95219e+06	3.08691e+06	2.5611e+06	2.4095e+06	2.23695e+06	49521.8	1.30588e+06	1.31769e+06	1.39935e+06	1.25968e+06	1.37124e+06	42597.2	107159	217079	92812.3	111340	100664	246921
2-methoxy-2-phenylaceticacid@8.162-rp	84439.1	58562	48051	23027.7	61570.7	61991.7	3.58553e+06	2.87923e+06	3.60102e+06	2.27985e+06	5.27975e+06	5.98642e+06	1.08322e+06	1.79267e+06	2.08256e+06	72459.1	1.74395e+06	102963	4.38106e+06	3.56149e+06	3.77309e+06	3.3529e+06	2.95994e+06	43460.9	1.91683e+06	2.18027e+06	1.9882e+06	1.92362e+06	1.98089e+06	33265.5	1.36657e+06	1.87108e+06	579144	1.47982e+06	818904	1.39582e+06
2-Mercaptobenzothiazole@10.946-rp	88645.5	154567	183933	132329	53832.4	53225.3	223839	232669	57859.5	104412	199241	181537	201563	147246	174865	185897	99302.7	204264	4.59475e+06	229964	144972	194952	203788	195092	287917	268448	239462	251468	232993	47119.7	94130.8	200772	58431.6	61754.9	180860	88205.6
166.99937@1-rp	395914	690661	376719	750919	634121	1.01115e+06	422406	600070	319368	716622	497186	442506	252004	366070	377274	201706	277654	448127	300655	338537	434355	397895	326163	9007.65	469146	435704	366685	436283	414528	8666.8	483902	325043	389397	363231	291323	528290
acetyltaurine@1.386-rp	1.65151e+06	2.65355e+06	1.68095e+06	1.60323e+06	2.38286e+06	2.46135e+06	2.47678e+06	1.73943e+06	2.63732e+06	2.4433e+06	2.36585e+06	2.63882e+06	2.13645e+06	1.9429e+06	1.74971e+06	1.67514e+06	1.89769e+06	1.83784e+06	1.98462e+06	2.62144e+06	2.38905e+06	2.61503e+06	2.80153e+06	10443.4	2.11229e+06	2.08711e+06	2.18336e+06	1.94415e+06	2.12736e+06	10247.4	2.12636e+06	2.39417e+06	1.99076e+06	1.92179e+06	1.93522e+06	2.09477e+06
acetyltaurine@1.248-rp	795002	1.00216e+06	774588	673509	998354	945733	1.06913e+06	707736	964113	980037	1.20058e+06	1.09371e+06	1.15143e+06	823955	884184	708821	1.01758e+06	986668	942219	1.26111e+06	1.03758e+06	1.18121e+06	1.09267e+06	14119.5	919790	914442	928152	959283	888929	13671.2	830383	1.04032e+06	866205	935610	877976	929163
3-methoxyanthranilicacid@1.422-rp	1.43652e+06	2.01586e+06	1.08985e+06	1.20568e+06	1.37414e+06	1.57815e+06	2.1352e+06	1.39875e+06	2.06581e+06	1.07643e+06	1.56018e+06	2.28221e+06	1.02611e+06	1.77784e+06	1.74391e+06	1.52648e+06	1.10737e+06	1.89657e+06	1.58222e+06	1.86971e+06	1.23728e+06	1.33908e+06	1.16492e+06	108905	1.56886e+06	1.46543e+06	1.60362e+06	1.267e+06	1.42922e+06	95788.9	968184	1.18263e+06	627143	1.17572e+06	1.16203e+06	1.22285e+06
167.8677@0.999-rp	222254	664814	447001	295039	516858	427360	258167	476824	499268	499821	409004	424907	530972	410206	530424	506630	430970	461927	603622	676291	508229	449014	576719	14147.3	535443	568050	438852	506172	488422	13612	542575	501754	391604	521201	535934	686477
Uricacid@1.755-rp	1.47455e+08	1.66646e+08	155199929	1.84869e+08	1.76322e+08	1.71248e+08	8.71542e+07	1.56562e+08	1.08154e+08	1.22805e+08	1.36845e+08	1.14867e+08	1.14083e+08	6.81876e+07	6.28789e+07	4.3908e+07	1.27086e+08	1.11792e+08	7.97195e+07	149483928	1.5796e+08	1.08433e+08	1.32813e+08	1.00297e+06	1.36628e+08	125988238	1.3819e+08	120328163	1.29905e+08	973567	1.89712e+08	1.48296e+08	1.61285e+08	1.75492e+08	1.19777e+08	170505396
168.05091@0.97-rp	3.85185e+07	3.99776e+07	3.79397e+07	3.26783e+07	3.2579e+07	3.28376e+07	4.33737e+07	4.53696e+07	4.36949e+07	4.17335e+07	40531989	5.69307e+07	4.83372e+07	4.93051e+07	3.84018e+07	4.3498e+07	4.62036e+07	4.56065e+07	3.40634e+07	4.07041e+07	3.82739e+07	4.05401e+07	4.18294e+07	109841	4.91453e+07	3.76024e+07	4.05802e+07	4.36468e+07	4.06959e+07	101956	4.1869e+07	4.34212e+07	4.23884e+07	4.52409e+07	4.55336e+07	3.80717e+07
DC2810000@7.558-rp	1.05399e+07	1.90774e+07	1.20777e+07	2.0572e+07	1.46736e+07	1.87126e+07	1.92776e+07	2.61214e+07	1.49516e+07	2.08783e+07	1.30323e+07	2.14062e+07	1.79885e+07	1.77265e+07	1.51661e+07	1.14857e+07	1.86015e+07	1.68865e+07	1.87042e+07	1.75959e+07	1.86292e+07	1.498e+07	1.43647e+07	686940	1.63218e+07	1.72838e+07	1.58427e+07	1.44121e+07	1.63679e+07	633319	1.35039e+07	1.04316e+07	1.14005e+07	1.56247e+07	1.03646e+07	1.19635e+07
DC2810000@6.487-rp	8.91846e+06	6.58531e+06	9.61443e+06	7.87332e+06	9.97614e+06	9.20661e+06	4.30797e+06	8.77338e+06	9.08083e+06	8.34068e+06	7.69791e+06	5.09814e+06	5.71001e+06	5.8605e+06	1.15029e+07	9.63327e+06	5.91205e+06	5.21939e+06	7.83656e+06	5.31671e+06	6.51094e+06	5.95648e+06	6.56159e+06	508754	7.95307e+06	7.80688e+06	8.93664e+06	7.41005e+06	8.60696e+06	516815	1.319e+07	9.10384e+06	7.63883e+06	8.60016e+06	1.03813e+07	8.45587e+06
DC2810000@9.837-rp	1.77558e+06	2.53654e+06	2.02622e+06	2.72419e+06	2.09534e+06	3.30775e+06	2.18279e+06	3.16765e+06	2.14129e+06	2.83293e+06	1.89205e+06	2.41749e+06	2.18225e+06	2.15539e+06	2.46443e+06	2.05047e+06	2.64932e+06	1.93006e+06	2.65072e+06	2.09671e+06	2.10529e+06	2.06236e+06	2.06877e+06	592891	2.14603e+06	1.98633e+06	2.33484e+06	1.9995e+06	2.31405e+06	443022	2.50539e+06	2.1035e+06	1.65171e+06	2.34733e+06	2.08223e+06	1.79747e+06
168.08721@0.916-rp	3.42914e+07	5.42152e+07	3.63073e+07	3.65945e+07	3.64475e+07	2.84382e+07	4.62613e+07	4.22411e+07	3.63673e+07	3.39608e+07	3.48861e+07	5.21114e+07	3.60738e+07	2.99594e+07	2.72146e+07	3.26812e+07	3.96565e+07	4.00097e+07	3.33064e+07	4.29528e+07	3.17741e+07	3.14733e+07	3.26304e+07	235776	3.31447e+07	3.40592e+07	3.65856e+07	3.2509e+07	3.52756e+07	189507	2.62702e+07	3.24136e+07	2.87018e+07	3.14149e+07	2.80576e+07	3.15509e+07
168.97843@0.972-rp	1.12008e+07	1.36912e+07	8.07756e+06	12995072	1.36895e+07	1.13033e+07	1.09835e+07	8.02053e+06	7.96595e+06	1.03266e+07	1.15061e+07	1.35165e+07	1.11578e+07	8.06285e+06	6.88835e+06	7.88852e+06	8.52837e+06	1.24207e+07	8.4291e+06	1.20373e+07	1.13661e+07	9.6169e+06	9.5047e+06	9973.32	9.42807e+06	1.01237e+07	1.01652e+07	1.04352e+07	9.08957e+06	10753.3	8.05121e+06	7.21968e+06	9.01421e+06	1.06246e+07	8.10708e+06	1.19573e+07
168.99496@2.128-rp	392806	397418	528871	755555	604971	710793	457504	763790	567086	702859	503002	638238	466179	560513	695699	560439	628626	599334	556697	590564	614774	648113	619964	24359	547597	604652	637599	626101	634778	21622.3	672387	524264	432886	617414	475411	517764
1-Naphthylisocyanate@3.058-rp	7.88856e+06	9.47042e+06	6.38468e+06	8.78156e+06	6.73467e+06	6.26044e+06	5.49838e+06	7.38417e+06	5.65741e+06	4.89674e+06	4.69395e+06	7.68719e+06	5.87359e+06	5.26282e+06	4.73568e+06	6.08341e+06	6.88807e+06	7.1463e+06	6.11924e+06	6.88087e+06	6.52731e+06	5.96723e+06	6.65988e+06	25043.6	5.86776e+06	6.30799e+06	6.16207e+06	5.908e+06	5.87466e+06	23679.2	6.72517e+06	6.67035e+06	4.33588e+06	8.22591e+06	3.28724e+06	6.59102e+06
1-methylhistidine@0.972-rp	1.05605e+07	7.74282e+06	1.28479e+07	9.39509e+06	9.03163e+06	1.01799e+07	1.03859e+07	1.58346e+07	1.417e+07	1.01523e+07	9.98712e+06	1.11972e+07	7.37049e+06	1.08193e+07	7.86105e+06	7.53195e+06	1.07269e+07	1.32904e+07	1.27771e+07	1.27825e+07	1.10338e+07	1.00772e+07	1.11253e+07	830189	9.15581e+06	1.19251e+07	1.19949e+07	1.09928e+07	8.24805e+06	41527.4	6.63789e+06	9.47443e+06	8.93525e+06	8.48623e+06	9.24831e+06	8.43464e+06
Aceclidine@10.789-rp	5.76174e+06	6.38367e+06	5.66008e+06	7.9473e+06	6.10893e+06	7.70141e+06	5.22663e+06	8.67863e+06	6.05844e+06	7.43911e+06	5.373e+06	6.39057e+06	5.81934e+06	6.25017e+06	7.22724e+06	5.21081e+06	5.54083e+06	4.72237e+06	6.80248e+06	6.23101e+06	6.58569e+06	5.69666e+06	5.90831e+06	196875	6.11652e+06	6.56459e+06	6.74065e+06	5.95785e+06	6.66599e+06	170047	7.64197e+06	5.83016e+06	4.90811e+06	5.82358e+06	6.23295e+06	5.65639e+06
Benzylphosphonate@0.928-rp	1.93612e+07	3.3417e+07	3.126e+07	4.3192e+07	2.84638e+07	4.95139e+07	2.5256e+07	4.10351e+07	3.36598e+07	3.90632e+07	2.65353e+07	2.43956e+07	2.20709e+07	3.1018e+07	3.49398e+07	1.86693e+07	2.33055e+07	2.89902e+07	2.45163e+07	2.21713e+07	2.63121e+07	2.65752e+07	2.57201e+07	399456	2.64843e+07	3.03821e+07	3.0347e+07	2.46379e+07	3.0073e+07	21867.6	3.78465e+07	2.81069e+07	2.25849e+07	1.96624e+07	2.79915e+07	2.58931e+07
Ethyl2-oxocyclohexanecarboxylate@11.055-rp	9.08865e+06	1.10913e+07	9.3599e+06	1.23924e+07	1.03578e+07	1.08019e+07	8.144e+06	1.49635e+07	1.06197e+07	8.35587e+06	8.01566e+06	7.33566e+06	9.74302e+06	8.07816e+06	7.54755e+06	9.40549e+06	9.02553e+06	5.96342e+06	1.17305e+07	9.93129e+06	8.55654e+06	7.94868e+06	9.5295e+06	767268	1.02317e+07	9.88168e+06	7.79495e+06	8.72218e+06	1.08966e+07	867628	1.14712e+07	8.12486e+06	6.4897e+06	1.02072e+07	1.05514e+07	9.35222e+06
Ethyl2-oxocyclohexanecarboxylate@6.693-rp	1.21947e+06	1.65272e+06	1.24266e+06	1.69229e+06	1.61409e+06	1.73547e+06	1.21741e+06	2.16371e+06	1.48079e+06	1.86689e+06	1.17791e+06	1.49674e+06	1.43088e+06	1.41583e+06	1.66494e+06	1.39175e+06	1.63195e+06	1.23877e+06	1.75929e+06	1.48571e+06	1.4296e+06	1.25864e+06	1.33207e+06	133822	1.47403e+06	1.52253e+06	1.52077e+06	1.38184e+06	2.01163e+06	122090	1.77264e+06	1.60009e+06	1.15376e+06	1.7407e+06	1.38398e+06	1.29516e+06
Ethyl2-oxocyclohexanecarboxylate@10.99-rp	2.89089e+06	2.03414e+06	3.49701e+06	2.94405e+06	4.10722e+06	1.37432e+06	1.52403e+06	4.97553e+06	3.85826e+06	1.4297e+06	3.0327e+06	1.06658e+06	1.9158e+06	1.45012e+06	2.97787e+06	4.44404e+06	3.3145e+06	1.05451e+06	3.88621e+06	4.16417e+06	1.98889e+06	1.29941e+06	3.68995e+06	76006.5	4.05389e+06	4.62745e+06	2.80146e+06	2.66815e+06	3.00941e+06	72996.5	1.74887e+06	1.58014e+06	762713	1.21139e+06	4.4866e+06	2.41513e+06
Ethyl2-oxocyclohexanecarboxylate@9.843-rp	1.66141e+06	1.88587e+06	1.76655e+06	2.69317e+06	1.87894e+06	2.28626e+06	1.36895e+06	2.53525e+06	1.83893e+06	2.30643e+06	1.44713e+06	1.84078e+06	1.50436e+06	1.4387e+06	1.86538e+06	1.34013e+06	1.79533e+06	1.63726e+06	1.81461e+06	1.5568e+06	2.01103e+06	1.58708e+06	1.72485e+06	76664.5	1.689e+06	1.61956e+06	1.9625e+06	1.84213e+06	2.12166e+06	65323.8	2.40947e+06	1.568e+06	1.68599e+06	2.12264e+06	1.90582e+06	1.77845e+06
3,7-dimethylocta-1,6-dienediol@14.987-rp	1.24013e+06	1.63387e+06	2.45106e+06	1.2535e+06	2.62957e+06	2.68125e+06	1.91643e+06	157458	1.47712e+06	1.57387e+06	1.13162e+06	275903	1.60356e+06	1.41422e+06	2.11485e+06	2.62031e+06	1.45205e+06	1.2582e+06	971321	1.43915e+06	443487	1.76276e+06	1.18404e+06	35060.9	1.39977e+06	1.37139e+06	1.54529e+06	1.47479e+06	1.64441e+06	55280.6	1.48545e+06	843074	1.61028e+06	1.73802e+06	1.59458e+06	848777
XT5075000@7.641-rp	75832.9	164017	43852.1	62008.4	59634.4	390038	32852.1	108216	46702.3	258801	24910.3	1.52294e+07	89819	101149	44912.3	116253	4.97326e+06	129353	67288.6	200712	70810.7	94512.2	104649	30005.8	731480	952393	911084	888964	767477	23042.9	37830.8	73192.9	257296	76183	836537	686011
171.4529@1.383-rp	964153	1.76987e+06	2.41409e+06	1.28417e+06	1.71864e+06	1.59201e+06	1.15615e+06	1.58149e+06	1.46315e+06	1.5484e+06	1.4115e+06	1.68194e+06	1.37392e+06	1.22197e+06	1.23407e+06	973205	1.62071e+06	1.50096e+06	1.01253e+06	959743	1.08461e+06	1.68274e+06	2.07817e+06	31930.6	1.15416e+06	1.45602e+06	1.69516e+06	1.55104e+06	1.74792e+06	31342.4	1.13271e+06	1.71505e+06	2.44373e+06	1.82498e+06	1.48056e+06	1.78985e+06
171.56519@11.112-rp	213393	442552	193514	413407	279592	537924	532369	254544	290337	359519	276794	312796	737485	338739	121040	84704.8	129579	519938	383328	257709	480698	214397	67426.2	14799.2	303923	302279	285907	239607	359857	14429.7	369311	307023	222033	878079	270971	69382
172.03477@1.295-rp	8.56061e+06	3.39806e+06	9.20485e+06	7.36255e+06	9.80296e+06	7.89332e+06	8.09971e+06	6.9263e+06	8.22661e+06	8.14095e+06	7.73288e+06	7.74619e+06	8.23433e+06	7.80748e+06	8.17244e+06	8.4547e+06	7.05332e+06	1.04167e+07	8.62303e+06	7.72397e+06	8.0508e+06	8.01278e+06	7.463e+06	535436	7.03928e+06	8.65504e+06	1.13443e+07	8.1315e+06	9.30099e+06	485680	9.12354e+06	7.6673e+06	7.25446e+06	8.19547e+06	9.48741e+06	9.44284e+06
Diethylfumarate@6.066-rp	3.16297e+06	3.78201e+06	3.60432e+06	4.61734e+06	3.88482e+06	4.47124e+06	2.73448e+06	5.80156e+06	4.07423e+06	4.4166e+06	3.21147e+06	3.6499e+06	3.40403e+06	3.74518e+06	4.58841e+06	3.12852e+06	3.36677e+06	3.14853e+06	4.29144e+06	3.83551e+06	3.76444e+06	3.40342e+06	3.66117e+06	106415	3.39044e+06	3.74333e+06	3.70912e+06	2.82453e+06	3.84866e+06	94934.3	4.61577e+06	3.54439e+06	2.92426e+06	3.96564e+06	3.68467e+06	3.42127e+06
Diethylfumarate@6.346-rp	6.98666e+06	9.02514e+06	7.94845e+06	1.00465e+07	8.96067e+06	1.05972e+07	6.36127e+06	1.1411e+07	9.31272e+06	1.00434e+07	7.06235e+06	8.65989e+06	8.64766e+06	9.00078e+06	9.91211e+06	7.25807e+06	5.88172e+06	6.87483e+06	9.99735e+06	8.54577e+06	8.63613e+06	8.09238e+06	7.54897e+06	412914	8.60374e+06	9.6022e+06	8.9015e+06	8.54542e+06	8.35721e+06	328642	1.04882e+07	8.05102e+06	6.4551e+06	8.29897e+06	8.1435e+06	7.48921e+06
9-oxononanoicacid@9.991-rp	1.20775e+07	1.7339e+07	1.61477e+07	2.15333e+07	1.75778e+07	1.66531e+07	1.50249e+07	2.23949e+07	1.35932e+07	2.22599e+07	1.50094e+07	1.47557e+07	1.73976e+07	1.42101e+07	1.5247e+07	1.10064e+07	1.74581e+07	1.06494e+07	1.97119e+07	1.41233e+07	1.68842e+07	1.97997e+07	1.46784e+07	1.12201e+06	1.35331e+07	1.57349e+07	1.67561e+07	1.54412e+07	1.47103e+07	1.16409e+06	1.93325e+07	1.26776e+07	9.08964e+06	1.67957e+07	1.0682e+07	1.40308e+07
9-oxononanoicacid@9.834-rp	7.67818e+07	9.32701e+07	7.58333e+07	9.69774e+07	8.9918e+07	1.02522e+08	7.15091e+07	1.09906e+08	8.83562e+07	9.89088e+07	8.08201e+07	7.86995e+07	8.07793e+07	8.4829e+07	1.00869e+08	7.9077e+07	8.68494e+07	7.04903e+07	1.09468e+08	9.12189e+07	82334741	8.20476e+07	8.42527e+07	1.81269e+06	8.58241e+07	8.46559e+07	9.09349e+07	8.86527e+07	9.57535e+07	1.56956e+06	1.01152e+08	7.76366e+07	6.73271e+07	8.77333e+07	8.6306e+07	7.07081e+07
Hexanoylglycine@7.097-rp	1.68494e+06	3.95934e+06	1.62793e+06	1.98575e+06	1.75259e+06	1.6199e+06	1.5578e+06	1.65827e+06	2.57131e+06	1.41545e+06	1.66286e+06	1.93663e+06	1.62583e+06	2.14912e+06	1.29699e+06	1.1682e+06	2.18061e+06	2.32707e+06	1.92674e+06	2.77221e+06	1.79807e+06	1.6202e+06	2.16497e+06	48757.4	1.84635e+06	1.88653e+06	1.82441e+06	1.79503e+06	1.90313e+06	47230.2	1.45374e+06	2.31762e+06	1.63203e+06	1.75228e+06	1.22123e+06	1.68715e+06
Hexanoylglycine@7.718-rp	727339	2.4499e+06	4.42348e+06	1.72371e+06	2.0898e+06	1.95187e+06	1.50848e+06	272144	1.42996e+06	1.62554e+06	745391	604999	1.1887e+06	1.10125e+06	1.35865e+06	1.54038e+06	817367	1.21873e+06	1.08925e+06	1.38067e+06	546500	1.53296e+06	1.49198e+06	48721.9	1.58249e+06	1.65848e+06	1.56599e+06	1.50461e+06	1.57748e+06	45054.9	1.97804e+06	2.57132e+06	2.70949e+06	3.04647e+06	1.02916e+06	1.95247e+06
1-(3-dimethylaminopropyl)-3-ethylurea@1.438-rp	1.40655e+06	1.75248e+06	935665	439185	2.91023e+06	1.3562e+06	1.90012e+06	1.07252e+06	1.96407e+07	833232	622683	2.59431e+06	1.94107e+06	1.17396e+06	2.44521e+06	676018	1.55635e+06	1.81396e+06	3.69612e+06	593843	1.46323e+06	1.03202e+06	797545	1.90822e+06	4.36271e+06	4.32535e+06	4.42846e+06	3.51733e+06	3.96603e+06	1.88503e+06	735696	1.08409e+06	2.81731e+06	997146	7.05023e+06	2.69404e+06
Phenolsulficacid@3.654-rp	72369.9	177128	35265.9	50190.2	58601.3	72392.9	640655	544217	1.34991e+06	998237	2.52776e+06	2.52324e+06	6.3367e+06	2.00762e+06	3.34174e+06	1.82508e+06	5.05783e+06	3.93107e+06	3.10776e+06	3.66491e+06	997790	2.9804e+06	2.67755e+06	36150.3	4.12761e+06	4.05459e+06	4.47899e+06	4.0793e+06	4.32541e+06	34866.1	1.24962e+07	2.47035e+07	1.5416e+07	4.90245e+06	1.72255e+07	5.25441e+06
cis-Aconiticacid@1.398-rp	3.2228e+06	2.95104e+06	3.41232e+06	2.70973e+06	4.19909e+06	4.04614e+06	1.57981e+06	1.07637e+06	2.38651e+06	1.67534e+06	2.05176e+06	1.79996e+06	1.05402e+06	1.03469e+06	1.06993e+06	1.50559e+06	1.63904e+06	1.41449e+06	2.30373e+06	2.75224e+06	2.30136e+06	1.93098e+06	2.73077e+06	44345.7	2.0303e+06	2.66073e+06	2.55189e+06	2.15356e+06	2.33514e+06	43521.9	2.2369e+06	3.69283e+06	1.58861e+06	2.85252e+06	2.35907e+06	3.82038e+06
cis-Aconiticacid@1.896-rp	1.23198e+06	1.99914e+06	1.6354e+06	1.09215e+06	1.65676e+06	1.94042e+06	1.21741e+06	875215	1.51358e+06	1.34282e+06	1.47641e+06	1.24528e+06	1.10823e+06	1.29624e+06	893137	1.0031e+06	1.35879e+06	1.32909e+06	1.11202e+06	1.27517e+06	1.32231e+06	1.41526e+06	1.17296e+06	23909.4	1.2551e+06	1.41493e+06	1.34777e+06	1.18526e+06	1.45867e+06	24290.7	1.42707e+06	1.54082e+06	1.24691e+06	1.5639e+06	1.20437e+06	1.33117e+06
1-Benzyl-1H-phosphole@0.964-rp	917723	1.2338e+06	1.17478e+06	1.45899e+06	761752	1.68447e+06	1.05272e+06	2.09605e+06	1.47261e+06	1.47548e+06	1.74419e+06	1.69983e+06	1.06387e+06	1.55015e+06	1.2857e+06	773957	1.08537e+06	1.38465e+06	883886	859484	983676	1.28549e+06	914171	9512.14	1.41196e+06	1.25637e+06	1.44658e+06	1.30332e+06	1.1874e+06	8052.91	1.63009e+06	1.34352e+06	1.17303e+06	982269	1.42871e+06	1.22767e+06
2-propylglutaricacid@11.836-rp	1.17496e+06	1.75931e+06	1.36777e+06	1.55579e+06	1.58416e+06	1.87878e+06	1.27906e+06	1.78718e+06	1.66041e+06	1.82377e+06	1.39533e+06	1.2018e+06	1.43692e+06	1.77183e+06	1.94953e+06	1.64037e+06	1.61436e+06	1.06609e+06	2.08192e+06	1.72561e+06	1.42055e+06	1.53335e+06	1.46978e+06	35823.8	1.4105e+06	1.46472e+06	1.43879e+06	1.2675e+06	1.67813e+06	63188.3	1.58916e+06	1.32463e+06	997479	1.29438e+06	1.2744e+06	1.14065e+06
2-propylglutaricacid@8.463-rp	4.55761e+07	4.85895e+07	4.27773e+07	6.16819e+07	4.51452e+07	5.18e+07	3.73638e+07	5.95047e+07	45407216	5.20888e+07	3.0578e+07	4.51189e+07	3.76277e+07	3.89169e+07	4.49686e+07	3.33402e+07	4.10412e+07	3.7932e+07	4.164e+07	3.70645e+07	4.37446e+07	3.73443e+07	3.83422e+07	3.46213e+06	4.25102e+07	4.43821e+07	4.56838e+07	4.33492e+07	4.38274e+07	5.78289e+06	5.83848e+07	4.58432e+07	4.44779e+07	5.22515e+07	5.56333e+07	4.42861e+07
2-propylglutaricacid@9.876-rp	760654	994452	755211	1.90789e+06	1.53036e+06	1.1241e+06	1.04503e+06	1.20837e+06	981751	1.23769e+06	938030	781639	787262	1.13842e+06	1.39631e+06	909299	978374	729589	1.26411e+06	1.08718e+06	1.10759e+06	1.02283e+06	1.00145e+06	137804	960317	841967	1.01155e+06	1.22118e+06	985210	156805	943229	563654	631883	873140	892942	719381
N-acetylornithine@1.127-rp	4.48334e+06	4.49388e+06	4.75326e+06	3.57454e+06	5.04092e+06	3.84276e+06	7.36194e+06	9.41805e+06	6.51358e+06	7.82825e+06	8.17691e+06	8.26564e+06	4.94059e+06	5.49331e+06	4.45125e+06	3.32023e+06	4.73427e+06	6.78207e+06	5.98549e+06	5.60945e+06	6.22883e+06	5.11836e+06	5.9018e+06	48732.4	5.82446e+06	5.37555e+06	5.7232e+06	5.6226e+06	6.05694e+06	45992.4	5.95115e+06	6.48303e+06	4.49773e+06	6.38071e+06	4.66765e+06	6.70982e+06
Arginine@0.972-rp	7.14664e+07	1.07783e+08	7.55591e+07	9.47632e+07	7.9371e+07	6.8705e+07	8.86393e+07	8.14303e+07	8.14314e+07	6.96826e+07	7.17956e+07	1.20943e+08	2.90872e+07	6.56242e+07	5.95195e+07	7.62445e+07	8.74626e+07	9.51573e+07	6.87327e+07	9.30648e+07	6.77966e+07	5.88043e+07	7.02201e+07	987085	8.01079e+07	7.31893e+07	8.17351e+07	7.28279e+07	7.06886e+07	649092	61667970	6.74162e+07	7.01887e+07	6.1623e+07	5.16928e+07	7.83779e+07
9-Hydroxynonanoicacid@9.213-rp	627283	745197	602545	844215	721712	865908	521531	1.05241e+06	912661	910229	587749	741946	681879	746254	946415	684293	859964	561391	1.11006e+06	679527	743592	714721	698906	106863	734065	773760	775385	711908	791932	51660.6	906849	751881	561308	870466	654395	617970
9-Hydroxynonanoicacid@9.763-rp	8.52019e+06	1.4351e+07	4.01857e+06	1.1974e+07	1.76446e+07	1.63645e+07	1.43891e+07	1.94683e+07	1.34114e+07	1.62859e+07	1.28773e+07	1.58193e+07	1.35227e+07	1.56533e+07	5.01121e+06	1.17395e+07	1.37637e+07	1.11738e+07	1.6181e+07	1.28228e+07	3.34623e+06	1.21603e+07	1.27318e+07	177156	1.29969e+07	1.06136e+07	1.66154e+07	1.34591e+07	1.3972e+07	208622	2.03164e+07	1.45442e+07	1.05051e+07	1.73014e+07	9.88917e+06	8.66755e+06
9-Hydroxynonanoicacid@10.127-rp	1.25068e+07	1.46825e+07	1.42098e+07	1.75018e+07	1.28385e+07	1.73369e+07	1.21078e+07	2.12537e+07	1.41623e+07	1.82117e+07	1.23381e+07	1.45157e+07	1.30824e+07	1.36996e+07	1.64362e+07	1.20322e+07	1.48509e+07	1.14305e+07	1.83328e+07	1.50434e+07	1.47441e+07	1.38485e+07	1.30579e+07	653811	1.43054e+07	1.4654e+07	1.40797e+07	1.3919e+07	1.45745e+07	561882	1.86079e+07	1.46346e+07	1.20729e+07	1.38805e+07	1.29627e+07	1.2443e+07
9-Hydroxynonanoicacid@10.662-rp	1.64458e+06	2.09054e+06	1.50482e+06	2.29541e+06	1.85616e+06	2.31854e+06	1.3577e+06	2.19597e+06	1.79041e+06	2.39044e+06	1.51937e+06	2.35405e+06	1.46692e+06	2.02914e+06	2.24497e+06	1.87492e+06	2.14884e+06	1.47292e+06	2.81504e+06	1.93396e+06	1.74445e+06	1.64177e+06	2.18496e+06	45164.1	1.82049e+06	1.65289e+06	2.00269e+06	2.05234e+06	2.16321e+06	107274	2.28644e+06	1.81021e+06	1.73682e+06	2.09051e+06	1.7305e+06	1.57226e+06
174.96926@1.272-rp	2.41808e+06	2.04898e+06	1.58542e+06	2.1155e+06	2.29072e+06	2205790	2.35235e+06	1.76059e+06	2.08343e+06	1.99612e+06	2.29565e+06	2.58888e+06	2.19798e+06	1.9637e+06	2.09561e+06	2.14128e+06	2.06303e+06	2.41478e+06	1.52824e+06	2.06104e+06	2.40761e+06	2.11999e+06	1.7981e+06	93895.3	2.15254e+06	1.95806e+06	2.23017e+06	1.76441e+06	2.23131e+06	96267.4	2.23634e+06	1.68691e+06	1.65231e+06	2.23125e+06	2.41068e+06	2.16667e+06
N-acetylasparticacid@1.433-rp	962820	1.56271e+06	883228	892162	1.05475e+06	1.25489e+06	1.20828e+06	897568	882667	1.00528e+06	1.0653e+06	1.8814e+06	995481	1.01338e+06	724146	768670	975516	1.18482e+06	835004	1.24475e+06	1.35185e+06	1.3947e+06	1.19282e+06	55501.1	1.04931e+06	1.06853e+06	1.05495e+06	995939	999638	15770	1.04189e+06	878340	984737	1.1611e+06	970394	1.31622e+06
Citrulline@1.016-rp	3.64842e+07	5.30772e+07	4.40729e+07	4.00358e+07	3.72877e+07	4.25057e+07	5.44961e+07	4.39659e+07	5.52263e+07	4.31433e+07	5.00609e+07	6.87824e+07	4.60875e+07	4.71259e+07	4.04981e+07	4.37797e+07	5.21974e+07	4.74026e+07	4.33246e+07	4.86255e+07	4.07887e+07	4.8482e+07	4.26183e+07	887320	4.43894e+07	4.3507e+07	4.4626e+07	4.39187e+07	4.84158e+07	628478	3.70662e+07	5.51241e+07	4.04172e+07	4.91108e+07	4.04992e+07	4.71441e+07
2-hydroxy-3-oxoadipicacid@1.387-rp	1.58389e+07	7.79149e+06	8.87405e+06	9.22856e+06	1.45151e+07	1.52507e+07	1.13774e+07	9.40297e+06	1.09964e+07	6.6755e+06	1.14351e+07	8.3795e+06	7.93928e+06	5.97225e+06	8.76998e+06	1.20518e+07	8.39282e+06	1.07872e+07	1.0939e+07	1.41199e+07	1.97095e+07	1.24751e+07	1.0068e+07	29872.9	9.84432e+06	1.17387e+07	1.07358e+07	1.00845e+07	1.01054e+07	29312.1	1.12334e+07	9.09473e+06	5.79021e+06	1.43906e+07	1.0205e+07	1.46839e+07
2-hydroxy-3-oxoadipicacid@1.246-rp	6.12321e+06	2.51134e+06	3.6286e+06	4.01679e+06	4.9073e+06	5.23032e+06	7.80054e+06	6.26366e+06	4.17366e+06	2.68735e+06	4.48535e+06	4.80165e+06	3.89367e+06	4.22309e+06	3.29287e+06	4.50422e+06	3.14526e+06	4.51587e+06	3.74275e+06	6.36852e+06	6.61821e+06	4.73595e+06	3.31735e+06	34090.6	4.29667e+06	4.03448e+06	4.05685e+06	3.73518e+06	3.66345e+06	31512.2	3.52226e+06	3.45132e+06	1.83222e+06	5.01607e+06	3.84602e+06	5.02817e+06
177.05122@0.94-rp	8.9842e+06	1.17469e+07	8.73636e+06	1.04543e+07	8.46704e+06	9.42137e+06	9.37182e+06	1.38283e+07	1.10704e+07	1.12238e+07	1.08144e+07	1.32282e+07	9.6738e+06	8.89285e+06	1.02648e+07	1.00157e+07	1.10893e+07	1.23082e+07	9.6575e+06	9.52908e+06	1.07524e+07	1.03677e+07	9.12168e+06	1.0579e+06	1.04682e+07	1.03385e+07	1.07777e+07	1.00425e+07	1.04553e+07	480032	7.51669e+06	1.14815e+07	8.94792e+06	9.95382e+06	9.50497e+06	9.9548e+06
177.05231@0.935-rp	872891	704593	730360	433932	617062	645889	666675	932109	846602	642605	507237	434524	394024	669727	645857	556218	699375	723666	747208	680811	721357	538680	569607	45713.4	773487	767004	742709	605936	884622	54735.3	526364	1.0165e+06	508848	596273	857429	669325
iodohypochlorite@1.064-rp	681817	845077	805925	713602	703224	697838	773635	772979	800708	871313	742457	767144	685680	877199	756181	786826	765995	1.44605e+06	714455	752770	818932	753014	796943	14083.3	727727	801843	646922	751695	863157	13394.1	814672	713667	706216	759276	780409	790871
177.90798@0.958-rp	1.09604e+06	1.18418e+06	1.34934e+06	675226	1.12265e+06	825992	1.07514e+06	1.12599e+06	1.19736e+06	1.13635e+06	1.11462e+06	1.45781e+06	1.18753e+06	1.09534e+06	1.14858e+06	1.02605e+06	1.20794e+06	1.06523e+06	828066	965452	739975	913821	1.14935e+06	9645.16	1.06269e+06	1.02159e+06	1.01708e+06	915499	1.10271e+06	9094.08	913422	1.0389e+06	933855	1.06672e+06	1.33465e+06	1.02721e+06
177.99738@1.131-rp	569934	581515	631524	488658	598617	645245	593908	751530	608711	670210	548641	756380	539642	604070	451129	476565	509498	818476	503399	498247	581512	461440	523228	25036	560786	555284	587071	518064	611023	28157.6	433799	575261	442158	661088	545209	544858
178.03256@0.83-rp	1.62229e+07	2.50561e+07	2.30802e+07	1.9623e+07	2.07394e+07	2.29393e+07	2.49683e+07	2.10187e+07	1.65655e+07	2.15041e+07	1.89636e+07	2.01362e+07	2.01877e+07	1.84291e+07	1.54132e+07	1.54793e+07	1.84614e+07	1.88625e+07	1.60649e+07	2.11161e+07	1.76447e+07	1.71413e+07	21077874	1.80461e+06	1.83628e+07	2.06971e+07	2.12265e+07	1.75993e+07	2.02574e+07	1.51246e+06	2.08034e+07	2.4946e+07	2.50555e+07	2.8457e+07	1.81438e+07	2.31591e+07
1-keto-inositol@1.139-rp	1.64394e+06	3.70344e+06	6.10309e+06	3.84799e+06	4.24433e+06	6.32919e+06	205499	4.32741e+06	1.94702e+06	834143	2.09668e+06	247125	388046	1.51177e+06	1.71224e+06	85490.5	2.82956e+06	166196	348835	319054	173190	311206	2.24439e+06	325483	2.70159e+06	3.81174e+06	3.18581e+06	2.27853e+06	2.61965e+06	282224	6.97501e+06	5.72456e+06	2.36476e+06	7.14387e+06	2.64102e+06	3.14312e+06
1-keto-inositol@1.032-rp	9.47541e+06	1.30516e+07	1.21994e+07	1.16888e+07	1.32333e+07	1.58215e+07	1.08134e+07	1.06172e+07	1.3464e+07	1.10253e+07	1.03393e+07	1.07121e+07	1.02342e+07	1.16241e+07	1.04986e+07	1.18678e+07	1.02932e+07	1.11697e+07	1.42425e+07	1.25544e+07	1.01984e+07	1.05142e+07	1.16909e+07	499636	1.16953e+07	1.39864e+07	1.19527e+07	8.6438e+06	1.23383e+07	422711	1.06166e+07	1.51468e+07	1.04134e+07	1.74419e+07	1.18292e+07	1.44868e+07
3-succinoylpyridine@5.981-rp	203153	535816	172581	307857	305631	352863	837909	527058	1.21428e+06	830124	1.24445e+06	975325	793756	542633	600241	464311	925617	742986	731780	1.21224e+06	1.17209e+06	721875	702135	56684.5	4.88021e+06	4.61726e+06	4.85591e+06	4.56164e+06	5.01533e+06	52329	2.70884e+07	2.47711e+07	1.77744e+07	1.35051e+07	2.27666e+07	2.60408e+07
179.86526@1.075-rp	903353	1.00963e+06	1.08678e+06	1.13454e+06	993832	931324	884086	982629	941196	1.07826e+06	934564	932201	807284	1.01698e+06	967273	794378	1.03786e+06	1.06449e+06	821404	1.05184e+06	1.01123e+06	943877	1.05637e+06	17187.7	787094	938816	938394	913895	1.00996e+06	16346.5	916267	1.01074e+06	812824	990956	997214	986924
179.92766@1.249-rp	2.34542e+06	1.87173e+06	1.86914e+06	1.78767e+06	1.99089e+06	1.6021e+06	2.82611e+06	2.34962e+06	1.92174e+06	1.6994e+06	1.9089e+06	1.60082e+06	2.44818e+06	2.17291e+06	2.12708e+06	2.10994e+06	1.4813e+06	1.74657e+06	2.24802e+06	2.24703e+06	2.00548e+06	1.68239e+06	1.47916e+06	21943.1	2.51393e+06	2.26061e+06	1.85378e+06	1.71704e+06	1.53553e+06	22378.3	2.43031e+06	2.22443e+06	2.09388e+06	2.00381e+06	1.82897e+06	1.68379e+06
Allose@1.017-rp	6.2823e+08	8.13488e+08	8.63235e+08	6.85562e+08	7.87968e+08	7.24282e+08	7.68231e+08	8.14265e+08	874406087	8.52251e+08	7.02758e+08	831361852	7.40967e+08	8.32842e+08	8.44264e+08	8.99666e+08	675618847	7.85282e+08	1010048959	8.32649e+08	708930915	7.40933e+08	8.64991e+08	300925	7.9113e+08	8.46688e+08	7.72903e+08	6.97658e+08	8.40889e+08	286427	7.81166e+08	8.41636e+08	6.63676e+08	8.46628e+08	7.5435e+08	9.3748e+08
Coniferylalcohol@13.33-rp	602873	823210	523096	426666	1.12345e+06	1.20157e+06	635873	423167	423632	634855	574278	741181	438954	339664	439869	406567	407500	439217	344608	304266	325916	518633	447094	66110.5	503384	549671	460169	462348	478721	60990.7	474741	490592	433426	713231	395470	708317
3-BHA@12.164-rp	488782	746423	516413	790266	875000	813679	491982	1.18335e+06	751591	857685	477098	729200	510660	561100	704094	573934	615537	536269	684079	582182	627580	529605	614421	194460	593501	615506	697386	604440	731626	228596	732256	685552	598922	741337	627686	651890
Beta-tyrosine@1.45-rp	4.77068e+07	8.85684e+07	5.70873e+07	6.46142e+07	6.16412e+07	7.76183e+07	7.29735e+07	6.57618e+07	6.79946e+07	4.68359e+07	6.02575e+07	8.62388e+07	3.61334e+07	4.95454e+07	4.55866e+07	3.90002e+07	6.36241e+07	6.07221e+07	7.15406e+07	7.71151e+07	4.83469e+07	5.93862e+07	6.54554e+07	306871	5.71617e+07	6.02759e+07	5.55771e+07	5.23489e+07	5.56768e+07	170558	5.53703e+07	6.01523e+07	3.61085e+07	6.41001e+07	3.13632e+07	6.53346e+07
181.10337@0.981-rp	523975	704981	546494	510611	460861	740900	1.28615e+06	924808	1.28546e+06	705319	1.36138e+06	1.18988e+06	702202	740266	665338	620354	696883	716386	931343	678450	435978	653069	635947	27448.5	781450	591255	614055	779060	502915	29595.1	685417	894622	537078	525282	686908	1.10227e+06
1,2-Benzoxathiine2,2-dioxide@0.873-rp	984759	1.29475e+06	1.28422e+06	943252	1.13048e+06	1.21813e+06	1.36881e+06	1.26708e+06	989754	1.20948e+06	1.00072e+06	1.06574e+06	1.33456e+06	1.00897e+06	825553	844321	929182	915093	851704	1.20275e+06	813605	949049	1.06525e+06	51262	855619	1.11242e+06	1.01332e+06	1.00266e+06	1.11088e+06	47221	1.02506e+06	1.30543e+06	1.16823e+06	1.44376e+06	976507	1.11917e+06
182.05554@6.706-rp	637903	751181	670071	961945	706852	819820	471284	802369	642597	687261	437262	627831	555954	657579	632646	505952	506169	538911	528787	540497	601128	506273	532955	16738.2	674406	679134	628796	615486	620088	17443.7	800890	610098	601947	724514	844284	764231
3,4-dimethoxybenzoicacid@4.38-rp	1.28616e+06	2.00789e+06	1.49896e+06	1.59725e+06	1.7698e+06	1.91764e+06	1.99116e+06	1.43632e+06	1.82017e+06	1.43825e+06	1.67107e+06	1.96413e+06	1.24608e+06	1.41375e+06	1.57403e+06	1.41637e+06	1.79063e+06	1.58576e+06	1.66452e+06	2.17748e+06	1.71795e+06	1.87849e+06	1.77252e+06	48936.9	1.66685e+06	1.71462e+06	1.66793e+06	1.57401e+06	1.69783e+06	25961.9	2.09689e+06	2.02309e+06	1.49069e+06	1.79179e+06	1.37182e+06	2.06383e+06
182.97329@1-rp	1.85987e+07	2.43108e+07	1.26205e+07	1.84767e+07	2.3121e+07	2.07045e+07	1.73406e+07	1.55749e+07	1.23635e+07	2.0239e+07	1.78273e+07	2.00301e+07	1.66239e+07	1.25435e+07	1.23404e+07	1.31254e+07	1.4563e+07	1.7605e+07	1.45217e+07	1.8478e+07	1.96932e+07	1.57966e+07	1.46655e+07	10643.7	1.82178e+07	1.69264e+07	1.63564e+07	1.6271e+07	1.63827e+07	10240.9	1.38448e+07	1.1035e+07	1.6678e+07	1.89751e+07	1.27739e+07	1.82229e+07
183.03799@0.843-rp	1.79875e+07	3.02718e+07	2.64647e+07	2.17014e+07	2.41952e+07	2.5775e+07	3.06294e+07	2.59e+07	2.10832e+07	2.36487e+07	2.22425e+07	2.38879e+07	2.51108e+07	2.11515e+07	1.87422e+07	1.81538e+07	2.13165e+07	2.23115e+07	1.95868e+07	2.56144e+07	2.06756e+07	1.93069e+07	2.39676e+07	1.89063e+06	2.23052e+07	2.45827e+07	2.57504e+07	2.00759e+07	2.49886e+07	1.53666e+06	2.33073e+07	3.06817e+07	3.02426e+07	3.43539e+07	2.15228e+07	2.76277e+07
Cholinephosphate@1.002-rp	972666	1.75628e+06	719209	1.03547e+06	1.39522e+06	926211	1.20563e+06	582505	852987	941179	1.1223e+06	1.3044e+06	966644	696720	729069	894138	623475	1.20809e+06	797523	1.62243e+06	1.37574e+06	848301	1.21789e+06	14786.8	927779	931399	855971	788537	1.06884e+06	51919	634789	681706	719480	820427	641001	1.1331e+06
5-hydroxyisourate@1.757-rp	4.43703e+06	5.47754e+06	5.51198e+06	7.38465e+06	7.53469e+06	7.96643e+06	2.29488e+06	4.88831e+06	3.46923e+06	4.82063e+06	5.86243e+06	5.67433e+06	2.96295e+06	2.09422e+06	2.19493e+06	1.80299e+06	5.94879e+06	5.87806e+06	1.92189e+06	4.44075e+06	6.1804e+06	4.95031e+06	7.14079e+06	50662.9	3.53548e+06	4.22682e+06	5.04491e+06	5.26648e+06	6.77917e+06	61270.5	4.95696e+06	4.76066e+06	5.92498e+06	6.85977e+06	5.68364e+06	8.56411e+06
184.02478@1.015-rp	1.21036e+06	1.54252e+06	1.0387e+06	904645	1.03893e+06	1.34724e+06	1.08092e+06	1.29189e+06	1.15574e+06	1.17234e+06	1.0909e+06	1.90855e+06	1.52904e+06	1.14842e+06	1.01931e+06	1.27848e+06	1.34437e+06	1.26028e+06	1.19442e+06	1.66209e+06	1.15568e+06	1.30286e+06	1.56527e+06	20312.7	1.47608e+06	1.19839e+06	1.24579e+06	1.1865e+06	1.23729e+06	21901.3	1.19759e+06	1.40997e+06	1.30839e+06	1.55817e+06	1.64359e+06	1.27634e+06
2-hydroxy-6-oxo-7-methylocta-2,4-dienoicacid@4.206-rp	705522	1.08787e+06	790881	1.1515e+06	1.09371e+06	1.12087e+06	869907	1.28006e+06	1.02557e+06	1.15332e+06	718199	942869	963725	943102	1.12752e+06	847144	1.14293e+06	846348	1.3835e+06	1.00833e+06	979586	942525	829655	104090	831877	916304	1.08003e+06	791389	995294	30520.8	1.25136e+06	926663	768059	1.11211e+06	794852	894533
2-hydroxy-6-oxo-7-methylocta-2,4-dienoicacid@4.644-rp	943039	1.12629e+06	1.03225e+06	1.26701e+06	1.14149e+06	1.2942e+06	859016	1.5404e+06	1.12929e+06	1.09448e+06	765685	1.08373e+06	1.07258e+06	1.24435e+06	1.13643e+06	823160	1.03069e+06	828857	1.24172e+06	1.03145e+06	1.07326e+06	848217	905380	96442.1	922785	1.04221e+06	1.04522e+06	688806	1.01662e+06	68369.4	1.29636e+06	901525	908770	1.1346e+06	1.04058e+06	913553
Veronal@2.051-rp	1.32563e+06	2.21826e+06	1.54951e+06	1.58847e+06	2.05278e+06	1.71083e+06	2.36152e+06	2.04874e+06	2.44226e+06	2.22092e+06	2.23833e+06	2.35126e+06	1.83148e+06	1.76119e+06	1.89694e+06	1.89179e+06	2.19498e+06	2.3801e+06	2.35455e+06	3.12942e+06	2.6912e+06	2.2778e+06	1.95757e+06	20553.1	1.85957e+06	1.97814e+06	2.01872e+06	1.72949e+06	2.07801e+06	16790	1.96002e+06	1.81759e+06	853007	1.62407e+06	1.34189e+06	1.98874e+06
184.10741@0.929-rp	1.65301e+06	1.58921e+06	1.8139e+06	1.39934e+06	1.32206e+06	1.51836e+06	1.53574e+06	1.73069e+06	1.4988e+06	1.37791e+06	1.28748e+06	1.314e+06	1.86908e+06	1.45766e+06	1.73738e+06	1.48274e+06	1.52482e+06	1.47602e+06	1.71058e+06	1.41509e+06	1.4061e+06	1.50314e+06	1.4584e+06	64762.1	1.91524e+06	1.50311e+06	1.385e+06	1.37291e+06	1.09979e+06	107593	1.61215e+06	1.45053e+06	1.36974e+06	1.21904e+06	1.4909e+06	1.2513e+06
1,6,6-trimethyl-2,7-dioxabicyclononan-3-one@11.069-rp	1.9476e+06	2.47896e+06	2.02679e+06	2.77736e+06	2.12304e+06	2.8449e+06	1.87001e+06	3.36726e+06	2.51074e+06	2.3585e+06	1.68283e+06	2.26857e+06	1.97952e+06	1.8607e+06	2.03504e+06	1.80779e+06	1.94346e+06	1.653e+06	2.5446e+06	1.86724e+06	2.16911e+06	1.64108e+06	1.90865e+06	300071	2.22834e+06	2.13701e+06	2.47414e+06	1.67796e+06	2.31241e+06	426570	3.09617e+06	2.01292e+06	2.0903e+06	2.39169e+06	2.27048e+06	2.17432e+06
10-Undecenoicacid@15.781-rp	391222	768530	752254	532664	560676	793949	1.21748e+06	533322	725128	824113	649154	627539	928025	556555	981654	812133	904006	698176	377084	709160	472787	1.03061e+06	738953	48571.7	829077	856325	754805	727050	811815	42087.3	1.01955e+06	458476	563263	1.15801e+06	539394	912078
Secnidazole@1.366-rp	457631	455653	712809	375332	950623	745831	120299	544685	213897	410030	288552	194836	130758	103088	260637	185914	374975	221168	351821	307168	430689	205284	431913	22881.2	392268	501883	425594	323456	403381	26300.8	871600	592572	365407	674524	343611	582463
2-methylcyclohexanonethiosemicarbazone@1.224-rp	1.21259e+06	1.8011e+06	883190	1.06403e+06	1.76163e+06	1.7362e+06	1.19916e+06	972228	919367	1.23621e+06	1.08238e+06	1.47915e+06	1.24033e+06	1.0968e+06	1.31131e+06	1.24837e+06	1.77386e+06	1.52576e+06	935271	1.23599e+06	1.40703e+06	967642	1.44407e+06	35662.4	1.22381e+06	1.3358e+06	1.37475e+06	1.01532e+06	1.09936e+06	38112.8	1.54279e+06	723808	816309	1.03508e+06	971481	848028
185.58086@12.825-rp	200264	412045	208001	196073	399655	486922	255861	193854	256540	372066	364224	150023	314146	333016	462801	373448	246379	149907	541393	374371	219426	184427	222263	14281.9	309495	320698	306184	302066	328185	13751.9	157040	202249	113664	283907	228416	164330
185.98787@0.928-rp	5.38536e+08	5.55886e+08	5.8961e+08	5.84506e+08	6.23271e+08	5.44983e+08	6.22162e+08	5.58231e+08	5.74766e+08	5.68009e+08	5.25811e+08	5.50596e+08	5.09851e+08	5.08607e+08	5.56644e+08	5.3902e+08	5.80011e+08	5.56469e+08	5.26345e+08	567634363	528590472	5.24756e+08	5.30018e+08	2.30536e+06	4.95269e+08	577972022	5.78425e+08	4.98379e+08	5.51777e+08	4.9572e+06	5.51605e+08	5.78861e+08	5.20877e+08	571762297	6.02487e+08	5.03795e+08
186.02947@1.071-rp	1.51954e+06	2.52609e+06	1.69981e+06	1.94762e+06	2.1807e+06	2.75642e+06	1.87456e+06	1.90182e+06	1.70484e+06	1.73395e+06	2.19603e+06	2.46088e+06	1.66175e+06	1.39062e+06	1.37686e+06	1.52855e+06	2.43107e+06	1.9284e+06	1.74132e+06	2.83e+06	2.41141e+06	1.75479e+06	2.36796e+06	43058.6	1.92675e+06	2.0633e+06	1.98251e+06	1.85658e+06	2.37531e+06	41775.7	3.12848e+06	3.17307e+06	2.0648e+06	2.99187e+06	2.14849e+06	2.73588e+06
186.05038@1.552-rp	1.05814e+06	1.97196e+06	3.25834e+06	1.20185e+06	2.66828e+06	2.08354e+06	1.62295e+06	838039	1.84833e+06	1.59738e+06	1.69057e+06	1.33077e+06	1.51572e+06	2.20172e+06	2.09562e+06	2.30065e+06	1.83011e+06	1.42735e+06	2.06807e+06	1.84708e+06	1.27183e+06	2.08368e+06	2.78931e+06	35027.1	1.82745e+06	2.03874e+06	2.32479e+06	2.10004e+06	2.32178e+06	38197.5	2.64305e+06	2.83177e+06	3.02173e+06	3.80307e+06	2.73173e+06	2.45116e+06
(1R,4S,5S)-4-Methyl-1-(trimethylsilyl)-3,6-dioxabicyclo[3.1.0]hexan-2-one@0.981-rp	1.55577e+07	2.62214e+07	2.19713e+07	2.31676e+07	1.85758e+07	3.12631e+07	1.3123e+07	3.07806e+07	2.80672e+07	2.48984e+07	1.49828e+07	2.13051e+07	2.00778e+07	2.3997e+07	2.17544e+07	1.60845e+07	1.63324e+07	1.72735e+07	2.07912e+07	2.16509e+07	1.5725e+07	1.53661e+07	1.75902e+07	27985.6	2.50404e+07	1.71173e+07	2.38886e+07	1.74923e+07	1.61021e+07	30174.3	2.45318e+07	2.42386e+07	1.05357e+07	1.53429e+07	1.89553e+07	2.1227e+07
2-carboxycyclohexylaceticacid@7.661-rp	2.33122e+06	3.0211e+06	2.59008e+06	2.03972e+06	2.99335e+06	2.89118e+06	2.23367e+06	3.70739e+06	2.82432e+06	3.42165e+06	453417	2.7669e+06	2.28714e+06	410347	2.97412e+06	2.04082e+06	2.41076e+06	1.84414e+06	2.14293e+06	2.53291e+06	2.98839e+06	313711	966795	44796.3	2.60003e+06	2.03556e+06	2.62629e+06	2.35616e+06	2.7646e+06	38694.2	395166	399837	2.49676e+06	2.72619e+06	2.48168e+06	2.02879e+06
2-carboxycyclohexylaceticacid@9.838-rp	1.4522e+06	1.97586e+06	1.69518e+06	2.36058e+06	1.83282e+06	2.33212e+06	1.75679e+06	2.63916e+06	1.92239e+06	2.37491e+06	1.64584e+06	1.84875e+06	1.67736e+06	2.02272e+06	2.01885e+06	1.78056e+06	2.18052e+06	1.62051e+06	2.13197e+06	1.81046e+06	1.68237e+06	1.78144e+06	1.71385e+06	46235.7	1.77332e+06	1.84365e+06	2.05548e+06	1.65479e+06	2.03934e+06	50841.6	2.12134e+06	1.70009e+06	1.48957e+06	2.10522e+06	1.7006e+06	1.55644e+06
2-carboxycyclohexylaceticacid@6.506-rp	7.86726e+06	6.73217e+06	8.88841e+06	8.42664e+06	9.24328e+06	1.00655e+07	4.44294e+06	9.45206e+06	9.059e+06	8.10468e+06	7.83646e+06	5.65887e+06	6.29315e+06	7.03512e+06	1.15521e+07	9.35097e+06	6.09143e+06	6.14581e+06	8.5142e+06	6.62406e+06	7.16637e+06	5.97769e+06	7.26975e+06	293755	8.01242e+06	8.13009e+06	9.8561e+06	6.6358e+06	7.78584e+06	238825	1.22194e+07	8.51097e+06	6.36255e+06	8.74765e+06	1.07381e+07	8.45868e+06
2-carboxycyclohexylaceticacid@7.554-rp	4.78007e+07	8.25141e+07	5.53701e+07	9.41878e+07	6.56548e+07	8.42181e+07	8.23869e+07	1.10161e+08	6.89431e+07	9.18548e+07	6.51881e+07	9.05292e+07	8.73854e+07	8.88543e+07	7.35398e+07	5.50427e+07	8.87586e+07	7.63992e+07	8.64112e+07	7.71032e+07	8.12377e+07	7.39517e+07	6.5805e+07	866541	7.22094e+07	7.76876e+07	7.4899e+07	6.77869e+07	7.80158e+07	816428	7.03902e+07	5.36311e+07	5.20538e+07	6.81342e+07	4.77892e+07	5.96338e+07
2-carboxycyclohexylaceticacid@8.114-rp	54223867	6.98751e+07	6.29785e+07	8.00907e+07	7.02973e+07	8.30885e+07	6.22547e+07	9.21886e+07	6.66665e+07	8.1158e+07	5.67813e+07	6.65751e+07	6.60927e+07	6.92219e+07	7.32017e+07	5.8413e+07	7.10187e+07	5.66845e+07	7.80985e+07	6.42284e+07	6.78145e+07	6.32902e+07	5.78901e+07	896905	6.66796e+07	6.92983e+07	7.18621e+07	6.39732e+07	6.83547e+07	962015	8.66694e+07	6.67136e+07	5.52607e+07	7.03075e+07	6.80962e+07	6.04306e+07
6-hydroxy-5-isopropenyl-2-methylhexanoicacid@12.81-rp	1.22925e+06	1.75203e+06	1.01337e+06	1.36933e+06	1.39731e+06	1.47301e+06	1.80663e+06	1.32311e+06	1.67296e+06	1.23763e+06	1.83599e+06	1.86637e+06	861893	1.00279e+06	1.05509e+06	1.26586e+06	1.56099e+06	1.47685e+06	1.15219e+06	1.86175e+06	1.84408e+06	1.3494e+06	1.6072e+06	249921	1.27213e+06	1.59474e+06	1.58049e+06	1.38096e+06	1.43338e+06	334932	1.63286e+06	1.62754e+06	794219	1.57722e+06	909671	1.86479e+06
Indole-3-acrylicacid@3.058-rp	4.93011e+08	5.98108e+08	4.1387e+08	5.23712e+08	4.33056e+08	3.94907e+08	3.46186e+08	4.69909e+08	3.44938e+08	2.95175e+08	2.58625e+08	4.6341e+08	3.43807e+08	3.33886e+08	2.91725e+08	3.75215e+08	3.99153e+08	4.67465e+08	3.89372e+08	421286050	4.05136e+08	3.75239e+08	3.88475e+08	382559	3.88289e+08	3.94459e+08	3.86809e+08	3.6559e+08	3.76393e+08	188545	3.72073e+08	4.18149e+08	283175946	5.17174e+08	2.05532e+08	4.26357e+08
Indole-3-acrylicacid@8.968-rp	739974	1.16596e+06	626389	869183	977319	924828	455678	362164	542061	377366	389342	436434	444172	542580	389763	396082	624485	520781	352872	553686	384327	531848	449713	21329.5	608354	616588	514911	502363	509146	18503.5	328218	499147	627258	719927	297242	446589
Indole-3-acrylicacid@10.88-rp	30118.6	41850.8	25211.8	22712.4	35536.6	16608.6	538767	788072	691065	662531	946025	759786	603706	902257	912493	610803	1.00872e+06	849731	1.0217e+06	1.17367e+06	1.57885e+06	807397	1.01782e+06	17191.2	683823	733625	734347	731368	665643	16756.9	1.21365e+06	926423	367041	786895	1.1162e+06	1.01062e+06
Amrinone@0.979-rp	933380	1.78753e+06	1.33829e+06	1.50588e+06	927428	1.75932e+06	830412	1.8747e+06	1.67498e+06	1.37078e+06	1.02686e+06	1.26766e+06	1.31541e+06	1.56907e+06	1.36475e+06	1.0849e+06	876679	1.15921e+06	1.49618e+06	1.52734e+06	1.11345e+06	975807	1.26799e+06	7930.42	1.63766e+06	1.06298e+06	1.54473e+06	1.12719e+06	1.23255e+06	8550.64	1.55006e+06	1.50317e+06	754566	878866	1.22917e+06	1.5154e+06
Amino-oxononanoate@9.408-rp	274854	730946	825433	549323	760827	582178	574810	152463	333923	666533	395903	311018	350747	248479	462772	486371	303481	289454	265718	490613	270949	365344	320838	19043.4	471493	434531	403621	489668	442274	21671.6	635743	660425	560857	566430	376061	589339
188.00864@1.271-rp	2.71604e+06	2.81548e+06	1.80164e+06	2.41818e+06	2.66233e+06	2.6924e+06	2.77116e+06	1.58243e+06	2.50638e+06	2.20809e+06	2.89716e+06	2.72626e+06	2.73468e+06	2.68749e+06	2.27304e+06	2.4316e+06	2.18837e+06	2.60191e+06	1.81491e+06	2.9574e+06	2.77972e+06	2.43512e+06	1.61477e+06	42475.8	2.24011e+06	2.38373e+06	2.35291e+06	2.15913e+06	2.46274e+06	48191.8	2.17084e+06	1.91682e+06	1.84444e+06	2.0063e+06	2.12705e+06	2.13257e+06
Tetranorbiotin@1.302-rp	1.25087e+06	1.21211e+06	931910	1.25767e+06	1.23612e+06	1.13174e+06	1.25566e+06	1.12198e+06	1.20313e+06	1.23628e+06	1.28326e+06	1.29699e+06	1.34504e+06	1.06429e+06	1.13931e+06	1.27061e+06	1.0893e+06	1.25232e+06	1.07894e+06	1.34806e+06	1.10259e+06	1.1516e+06	1.01395e+06	62879.1	1.30186e+06	1.17512e+06	1.29207e+06	1.03243e+06	1.21363e+06	58926.1	1.43191e+06	1.08597e+06	1.02654e+06	1.3144e+06	1.20674e+06	1.19668e+06
[(3-Fluorophenyl)hydrazono]malononitrile@1.294-rp	714923	672937	406459	590608	516899	534827	534732	466408	574849	527493	766559	687193	599960	553364	490386	529639	509902	593585	413463	642636	707545	526055	431044	25240.4	458497	532707	517849	556790	534674	23442.3	467179	467897	488773	552882	656957	519269
2-oxosubericacid@2.701-rp	640918	958072	703681	964403	845321	940568	747347	1.09778e+06	809078	967357	729054	834132	882212	828212	860257	518023	834166	677485	855264	822918	804773	753741	718909	17785.4	744982	853040	843069	743971	755162	17452.7	909957	684472	633395	766431	740462	702914
2-oxosubericacid@2.576-rp	358091	455684	400120	554312	388630	515858	358508	568024	410497	513149	408185	397752	422556	449664	498490	371731	480005	386901	470499	440785	396681	409460	369108	16613.1	421452	483896	404251	396372	434580	26213.7	631764	405392	331443	483113	376342	422764
N-acetylglutamine@1.448-rp	1.08204e+06	1.35362e+06	1.16437e+06	873986	1.29405e+06	1.108e+06	1.45548e+06	1.33373e+06	1.45699e+06	1.5037e+06	1.45786e+06	1.74839e+06	1.26218e+06	1.48786e+06	1.04988e+06	1.04428e+06	1.63032e+06	1.39936e+06	1.05652e+06	1.48934e+06	1.14383e+06	1.60591e+06	1.42336e+06	94819.5	1.35718e+06	1.58559e+06	1.40128e+06	1.18297e+06	1.56888e+06	97652.1	1.61109e+06	1.72217e+06	1.33161e+06	2.12722e+06	1.19231e+06	1.69224e+06
Azelicacid@12.833-rp	2.33705e+06	4.49933e+06	2.68699e+06	2.16817e+06	4.58923e+06	4.82678e+06	2.83466e+06	2.83214e+06	3.07029e+06	3.74472e+06	4.08445e+06	1.76307e+06	3.73048e+06	3.5834e+06	4.9683e+06	4.60255e+06	2.88471e+06	1.75159e+06	6.08561e+06	4.58821e+06	2.69536e+06	2.48708e+06	2.71303e+06	76994.9	3.32043e+06	3.50042e+06	3.24124e+06	3.16622e+06	3.5186e+06	55477.9	1.96845e+06	2.27896e+06	1.72534e+06	3.00898e+06	2.53318e+06	2.04685e+06
Azelicacid@11.013-rp	1.65851e+07	2.79454e+07	2.09913e+07	2.4337e+07	2.40667e+07	3.54536e+07	1.97135e+07	2.66565e+07	2.34771e+07	2.56748e+07	2.18618e+07	2.69463e+07	2.49619e+07	1.95644e+07	2.7643e+07	2.30537e+07	2.43255e+07	1.98425e+07	2.5222e+07	2.59129e+07	1.9325e+07	1.7277e+07	2.36237e+07	645133	2.13175e+07	2.9678e+07	2.03272e+07	2.27074e+07	27038776	530057	2.11866e+07	2.15533e+07	1.6673e+07	2.87811e+07	2.36144e+07	1.91271e+07
Azelicacid@9.844-rp	1464944581	1652417328	1463234052	2151571252	1623405884	1933312837	1277490729	2133606377	1548294204	1881165740	1326434821	1454784376	1357055489	1408463221	1624053413	1248221005	1479446665	1368199703	1577726492	1366062725	1422342356	1389554036	1423026420	2.5135e+07	1557358954	1604634254	1650123773	1607871803	1699488718	2.39988e+07	2080689546	1475554742	1343774560	1771214626	1652655844	1440001489
Azelicacid@6.693-rp	3.08343e+06	4.09002e+06	3.55681e+06	4.2368e+06	3.8572e+06	4.38844e+06	3.08281e+06	5.21557e+06	3.94634e+06	4.0569e+06	3.08453e+06	3.59041e+06	3.58198e+06	3.63092e+06	4.18509e+06	3.29781e+06	3.73232e+06	2.81731e+06	4.50781e+06	3.66073e+06	3.70371e+06	3.37009e+06	3.36745e+06	143433	3.86563e+06	3.85608e+06	3.70411e+06	3.71104e+06	3.60969e+06	128541	4.67774e+06	3.4872e+06	2.89678e+06	3.86072e+06	3.2007e+06	3.47075e+06
Glycylleucine@1.269-rp	2.0735e+06	2.73097e+06	2.14141e+06	1.78385e+06	2.1605e+06	2.23036e+06	2.51257e+06	2.38929e+06	2.26701e+06	2.37515e+06	2.22263e+06	2.62363e+06	2.13795e+06	2.04706e+06	2.04327e+06	1.77659e+06	2.31527e+06	2.22207e+06	1.75828e+06	2.41158e+06	1.75004e+06	2.1642e+06	2.05087e+06	85929.1	2.16338e+06	2.16102e+06	2.20685e+06	1.88e+06	1.82035e+06	79642.9	1.84756e+06	2.26561e+06	1.72823e+06	2.34464e+06	1.6178e+06	1.96909e+06
10-hydroxydecanoicacid@12.853-rp	1.28692e+06	1.76693e+06	1.76594e+06	1.14872e+06	2.22616e+06	2.2701e+06	1.58773e+06	623092	1.18266e+06	1.43337e+06	1.36777e+06	650603	1.21222e+06	1.41241e+06	1.37044e+06	1.32625e+06	1.38067e+06	1.63344e+06	1.07555e+06	1.28267e+06	743233	1.22254e+06	1.33096e+06	202044	1.3877e+06	1.66553e+06	1.50055e+06	1.21909e+06	1.35758e+06	243216	1.33224e+06	1.25968e+06	2.20416e+06	1.77494e+06	1.98066e+06	1.03984e+06
10-hydroxydecanoicacid@11.53-rp	1.14682e+06	999457	897587	993574	1.07785e+06	1.52262e+06	896212	1.24931e+06	943580	1.27156e+06	1.00069e+06	968481	990776	916773	1.1744e+06	839431	937043	1.09806e+06	1.43603e+06	1.20687e+06	1.30428e+06	951727	1.32658e+06	134455	1.11456e+06	1.22446e+06	1.01073e+06	986992	1.07986e+06	70559.1	1.59174e+06	945548	781420	977063	1.0587e+06	902769
188.985@1.267-rp	1.71841e+06	1.53935e+06	1.03812e+06	1.50753e+06	1.44221e+06	1.67003e+06	1.51843e+06	1.24611e+06	1.37774e+06	1.35921e+06	1.96678e+06	1.77341e+06	1.54132e+06	1.50926e+06	1.48843e+06	1.5549e+06	1.40605e+06	1.60916e+06	1.14266e+06	1.46015e+06	1.7377e+06	1.58687e+06	1.20697e+06	59438.4	1.46203e+06	1.49328e+06	1.47016e+06	1.42699e+06	1.52539e+06	54549.2	1.45358e+06	1.16923e+06	1.34674e+06	1.53293e+06	1.71928e+06	1.51051e+06
2-Amino-4-sulfophenol@1.879-rp	149691	194162	154953	166094	217373	229716	1.76023e+06	1.17727e+06	2.55228e+06	1.43209e+06	2.89122e+06	1.80813e+06	2.28913e+06	1.4683e+06	1.83711e+06	1.75765e+06	3.12836e+06	2.63386e+06	2.13005e+06	2.7772e+06	2.2694e+06	1.60873e+06	2.38454e+06	15940.6	1.61307e+06	1.83196e+06	1.63984e+06	1.51713e+06	1.68682e+06	15408.3	1.8244e+06	2.16857e+06	1.06645e+06	687184	2.01478e+06	2.55628e+06
2-amino-6-oxoheptanedioicacid@1.669-rp	510180	728079	515628	389568	540133	441864	782291	552903	747793	633993	756021	712871	649094	661529	521084	525634	831153	909904	776461	1.01673e+06	708474	577716	599810	29642.2	716735	669227	618457	566608	640754	14962.4	583466	683447	372570	630456	389033	714261
2-methylindole-3-aceticacid@10.937-rp	361295	445523	206426	364879	406075	409659	1.89391e+07	2.27614e+07	3.4295e+07	2.48322e+07	3.69049e+07	2.72297e+07	1.44416e+07	1.5357e+07	1.56969e+07	1.31156e+07	1.59141e+07	1.42562e+07	2.29386e+07	3.24008e+07	3.44973e+07	1.94114e+07	1.92248e+07	54462.6	2.03236e+07	2.12611e+07	2.01821e+07	1.91031e+07	2.01701e+07	50133.5	4.02813e+07	4.04128e+07	1.91515e+07	2.88762e+07	3.19993e+07	4.25997e+07
Octahydro-1,6,7,8-indolizinetetrol@6.36-rp	1.43159e+06	1.79804e+06	1.64089e+06	2.0712e+06	1.77669e+06	2.11549e+06	1.51244e+06	2.26194e+06	1.97105e+06	2.19134e+06	1.64385e+06	1.68583e+06	1.87962e+06	1.62419e+06	2.10855e+06	1.54506e+06	1.8765e+06	1.37313e+06	2.09738e+06	1.72889e+06	1.80487e+06	1.54298e+06	1.43115e+06	23160.5	1.79679e+06	1.89899e+06	1.92512e+06	1.96336e+06	1.71387e+06	24386.6	1.99925e+06	1.61165e+06	1.24463e+06	1.58363e+06	1.49694e+06	1.52352e+06
189.57589@10.993-rp	483080	614994	684012	554382	883743	722346	984027	764010	638942	661339	529917	1.42739e+06	1.0171e+06	664896	703581	608735	637906	903007	782904	563321	1.56864e+06	532840	642071	17684.3	1.00411e+06	1.22386e+06	1.2082e+06	1.13165e+06	709025	16778.8	1.90231e+06	1.69526e+06	996409	1.49013e+06	1.54616e+06	1.92383e+06
189.9356@1.093-rp	4.96465e+06	5.10243e+06	5.31415e+06	4.61006e+06	4.70879e+06	5.41695e+06	4.19755e+06	4.07074e+06	5.07673e+06	4.65473e+06	3.82936e+06	740225	3.92043e+06	4.48278e+06	4.85745e+06	1.18056e+06	5.53106e+06	4.45822e+06	4.38985e+06	3.58724e+06	5.21788e+06	4.37788e+06	4.71003e+06	657786	3.831e+06	4.09123e+06	5.41009e+06	3.95236e+06	5.72181e+06	713830	3.4416e+06	4.1202e+06	5.36758e+06	4.75559e+06	5.4088e+06	4.03755e+06
2,4-dichlorobenzoicacid@11.092-rp	1.01984e+06	1.27619e+06	9.97086e+06	1.23932e+07	759042	2.34943e+06	1.11222e+06	3.62924e+06	2.69851e+06	2.68273e+06	1.07686e+06	2.07962e+06	1.59358e+06	2.93033e+06	1.71191e+06	4.29538e+06	2.48442e+06	2.85469e+06	894829	2.70807e+06	5.22322e+06	5.73623e+06	2.30698e+06	684819	3.19876e+06	3.70792e+06	3.49864e+06	3.17554e+06	3.5416e+06	704561	2.97107e+06	3.39776e+06	6.61643e+06	6.29628e+06	2.56305e+06	1.42054e+06
3-sulfocatechol@3.103-rp	223997	246726	39016.1	209397	198505	165118	2.97737e+06	1.76792e+06	4.44161e+06	2.12424e+06	3.60358e+06	4.59863e+06	3.10524e+06	1.93524e+06	3.27484e+06	2.29044e+06	1.39371e+06	3.11102e+06	3.30079e+06	4.09877e+06	2.40602e+06	3022573	3.8961e+06	31526.7	2.61291e+06	2.56763e+06	2.52142e+06	2.71625e+06	2.52537e+06	183189	3.43133e+06	2.97461e+06	1.86099e+06	971191	3.12787e+06	3.9762e+06
190.06907@0.92-rp	2.24886e+07	3.26663e+07	2.36852e+07	2.39446e+07	2.30694e+07	1.88662e+07	2.97983e+07	2.73831e+07	2.4049e+07	2.17108e+07	2.22157e+07	3.20364e+07	2.1808e+07	1.96212e+07	1.8453e+07	21748138	2.66702e+07	2.6214e+07	2.22094e+07	2.79995e+07	2.11103e+07	2.16541e+07	2.19297e+07	43729.1	2.19524e+07	2.27246e+07	2.32895e+07	2.16763e+07	2.28878e+07	22426.4	1.72012e+07	2.17149e+07	1.96408e+07	2.11522e+07	1.8153e+07	2.09628e+07
3-hydroxybutanoyloxybutanoicacid@4.226-rp	759819	399366	784429	565688	765734	742572	280311	573820	619988	529876	537220	263847	349881	496335	825132	771801	332189	369229	561657	427729	465449	475904	507176	23668.5	581015	593829	556422	602222	652807	23104.8	1.00806e+06	852729	521972	638707	969051	641622
3-hydroxybutanoyloxybutanoicacid@6.273-rp	1.24871e+06	1.49014e+06	1.43321e+06	1.77477e+06	1.46974e+06	1.67023e+06	1.217e+06	1.83977e+06	1.41265e+06	1.69597e+06	1.11412e+06	1.53929e+06	1.3812e+06	1.41829e+06	1.63357e+06	1.35503e+06	1.33562e+06	1.07173e+06	1.68814e+06	1.42628e+06	1.48764e+06	1.28324e+06	1.41696e+06	38428.4	1.41943e+06	1.36052e+06	1.46818e+06	1.39979e+06	1.42698e+06	28965.9	1.84386e+06	1.45371e+06	1.18605e+06	1.45704e+06	1.50182e+06	1.14206e+06
3-hydroxybutanoyloxybutanoicacid@6.067-rp	2.39843e+06	2.76691e+06	2.50241e+06	3.40365e+06	2.8389e+06	3.56656e+06	2.14255e+06	3.7427e+06	2.74331e+06	3.20047e+06	2.42327e+06	2.62096e+06	2.54967e+06	2.78491e+06	3.05179e+06	2.47121e+06	2.50832e+06	2.16524e+06	3.35562e+06	2.90731e+06	2.58772e+06	2.55571e+06	2.43276e+06	46763.9	2.83967e+06	2.69189e+06	2.88623e+06	2.63451e+06	2.8182e+06	17110.9	3.43159e+06	2.61732e+06	2.09442e+06	2.75939e+06	2.84031e+06	2.67142e+06
2-{2-[2-(Allyloxy)ethoxy]ethoxy}ethanol@6.269-rp	1.43977e+06	1.61619e+06	1.53811e+06	2.13522e+06	1.71558e+06	1.98573e+06	1.28829e+06	2.20391e+06	1.69755e+06	1.75524e+06	1.30888e+06	1.70404e+06	1.56159e+06	1.67623e+06	1.92729e+06	1.41504e+06	1.45299e+06	1.37891e+06	1.83071e+06	1.66662e+06	1.80784e+06	1.489e+06	1.55012e+06	19147.1	1.92087e+06	1.94408e+06	1.56108e+06	1.65523e+06	1.64092e+06	18408.6	2.13469e+06	1.45318e+06	1.32139e+06	1.76491e+06	1.75311e+06	1.4802e+06
2-{2-[2-(Allyloxy)ethoxy]ethoxy}ethanol@6.447-rp	1.59327e+06	1.80517e+06	1.71939e+06	2.44859e+06	2.02813e+06	2.27939e+06	1.37268e+06	2.35233e+06	1.78725e+06	1.76419e+06	1.38633e+06	1.53011e+06	1.62649e+06	1.58722e+06	1.9895e+06	1.50536e+06	1.64481e+06	1.41116e+06	1.88474e+06	1.61159e+06	1.39382e+06	1.49419e+06	1.56105e+06	18527.4	1.44889e+06	1.39476e+06	1.62237e+06	1.91631e+06	1.6703e+06	19420.8	2.06998e+06	1.64734e+06	1.33738e+06	1.67881e+06	1.58397e+06	1.51739e+06
2-{2-[2-(Allyloxy)ethoxy]ethoxy}ethanol@7.318-rp	979213	1.07899e+06	1.04258e+06	1.50051e+06	1.30029e+06	1.2767e+06	970368	1.5561e+06	1.1234e+06	1.25807e+06	955300	1.06471e+06	1.04797e+06	1.09762e+06	1.30337e+06	917287	1.08304e+06	988232	1.28155e+06	1.20179e+06	1.122e+06	994581	1.04026e+06	22658	1.14442e+06	1.13832e+06	1.15425e+06	1.1639e+06	1.14002e+06	21254.9	1.25786e+06	1.06724e+06	921478	1.20193e+06	986611	921160
5-hydroxyindoleaceticacid@2.098-rp	1.78356e+06	2.61023e+06	2.48167e+06	1.99898e+06	1.84863e+06	2.38928e+06	1.96412e+06	1.80328e+06	1.85484e+06	1.70944e+06	1.60744e+06	2.41103e+06	2.04318e+06	1.92638e+06	2.21558e+06	2.64185e+06	2.81798e+06	1.98074e+06	1.64576e+06	1.46175e+06	1.55993e+06	1.6652e+06	1.33125e+06	75129.3	1.75829e+06	1.97735e+06	1.93387e+06	1.72371e+06	2.13066e+06	39656.1	1.55512e+06	1.41952e+06	2.01758e+06	2.08369e+06	1.15018e+06	1.90539e+06
5-hydroxyindoleaceticacid@7.58-rp	133592	235265	155231	189323	278342	216510	2.29275e+06	870294	1.49505e+06	944474	3.06537e+06	2.98629e+06	580305	1.63111e+06	977583	878993	1.5847e+06	1.13732e+06	1.87564e+06	2.96941e+06	1.26446e+06	2.17735e+06	2.00435e+06	37367.6	1.21295e+06	1.25971e+06	1.31598e+06	1.09857e+06	1.23543e+06	35199.5	1.16714e+06	1.84484e+06	272084	414618	303100	702079
191.06686@0.943-rp	1.33356e+06	999351	1.58981e+06	1.12644e+06	1.5615e+06	981454	1.63898e+06	2.16643e+06	1.54997e+06	1.76849e+06	1.67821e+06	1.38032e+06	1.46341e+06	1.43177e+06	1.10738e+06	1.25807e+06	1.65454e+06	2.12618e+06	1.65718e+06	1.5415e+06	1.18122e+06	1.93764e+06	1.51667e+06	48855.3	1.34962e+06	1.38217e+06	1.51989e+06	1.48679e+06	2.27433e+06	34761.1	1.06557e+06	1.64934e+06	1.38114e+06	1.39215e+06	1.18241e+06	1.2372e+06
191.98031@1.171-rp	391369	763194	619709	464973	673751	627547	648479	236088	562386	506782	742248	515634	258058	393524	223125	337515	284397	400508	296555	473924	303579	285821	315414	29338.1	411460	477620	422861	437924	503973	23412.9	508124	808243	240365	780434	462845	605328
2-dehydro-3-deoxy-d-glucaricacid@1.387-rp	3.2146e+06	4.77013e+06	4.73293e+06	4.03756e+06	3.97104e+06	4.62089e+06	3.64868e+06	2.98345e+06	4.52946e+06	4.08958e+06	3.89147e+06	2.96008e+06	3.1468e+06	3.06727e+06	3.07246e+06	4.05532e+06	3.69738e+06	4.43252e+06	3.30941e+06	4.15098e+06	3.66005e+06	3.58854e+06	4.33573e+06	199774	4.63044e+06	3.8836e+06	5.32815e+06	2.95352e+06	3.6594e+06	90248.9	3.92631e+06	5.24428e+06	7.54341e+06	6.43929e+06	4.87118e+06	4.00947e+06
2-dehydro-3-deoxy-d-glucaricacid@1.209-rp	9.1625e+06	2.63574e+06	2.74984e+06	1.60265e+06	1.32575e+07	1.78162e+06	9.81383e+06	6.18288e+06	1.8905e+06	1.88093e+06	1.08427e+07	2.19312e+06	1.04655e+07	7.87806e+06	5.50717e+06	632111	9.30577e+06	8.31911e+06	5.37319e+06	8.59193e+06	2.05827e+06	1.01313e+07	1.09188e+07	580002	1.03178e+07	9.28849e+06	1.1692e+07	1.16765e+07	2.26317e+06	282650	8.15567e+06	1.49981e+07	8.4374e+06	1.54372e+07	9.29646e+06	1.11138e+07
2-dehydro-3-deoxy-d-glucaricacid@1.291-rp	9.1625e+06	1.82404e+07	1.11115e+07	1.29263e+07	1.32575e+07	1.35988e+07	9.81383e+06	7.89062e+06	1.38878e+07	1.19477e+07	1.36342e+07	1.288e+07	1.04655e+07	7.87806e+06	7.51562e+06	8.31523e+06	1.2241e+07	1.04679e+07	5.88439e+06	1.22311e+07	1.25008e+07	1.01313e+07	1.09188e+07	933797	1.03178e+07	9.28849e+06	1.1692e+07	1.16765e+07	1.09236e+07	339371	1.08242e+07	1.49981e+07	9.59461e+06	1.54372e+07	9.29646e+06	1.11138e+07
Quinicacid@1.105-rp	66075.9	243881	331069	183398	327077	114087	60484.2	110763	74152.3	74064.5	108508	101466	60309.5	68611.7	65948.7	4.65034e+06	95839.8	81536.6	78882.2	91459.1	64786.9	60747.2	144195	72069.5	231132	269582	259942	285056	385698	63546.6	251402	268106	303796	193592	82561.8	105116
193.07042@1.43-rp	31541.3	1.34623e+06	33583.9	43387.2	576283	863040	34084.1	27832.2	27995.8	112452	176924	175295	55506.5	24702.7	24315.8	26946.3	142114	163276	30343.2	766344	268321	53435	869446	18810.3	113195	153390	174825	162366	217719	19801.4	75458	29235.2	186823	640354	21712.1	238438
2-methylhippuricacid@6.7-rp	573955	1.1171e+06	496736	886244	956670	716813	4.97379e+06	1.99557e+06	2.89641e+06	2.67809e+06	3.19759e+06	2.60241e+06	4.62846e+06	5.27927e+06	3.01365e+06	3.7032e+06	3.48356e+06	6.29069e+06	1.63952e+06	3.34558e+06	3.48355e+06	1.78273e+06	2.97293e+06	56697.8	2.68014e+06	2.84204e+06	2.75239e+06	2.47659e+06	2.7079e+06	55196.4	2.70553e+06	5.59812e+06	2.03376e+06	1.57389e+06	2.82018e+06	3.03457e+06
193.99583@1.076-rp	1.68909e+06	1.42791e+06	1.14677e+06	973143	2.36894e+06	1.02414e+06	1.07152e+06	1.39101e+06	1.12137e+06	1.13577e+06	1.35664e+06	1.03119e+06	994737	1.159e+06	1.40214e+06	1.30834e+06	1.07741e+06	1.36741e+06	1.14809e+06	2.3553e+06	1.52652e+06	1.15715e+06	1.40048e+06	22536.5	1.268e+06	1.40644e+06	1.17166e+06	1.07495e+06	1.37153e+06	21433.5	1.30102e+06	1.10963e+06	1.07812e+06	1.36519e+06	1.53243e+06	1.1288e+06
2-ketogluconicacid@1.023-rp	2.36029e+06	3.36673e+06	3.29802e+06	2.59773e+06	2.91371e+06	2.92981e+06	2.92884e+06	2.57345e+06	3.12387e+06	3.29392e+06	2.87537e+06	2.98202e+06	2.93608e+06	2.82554e+06	2.79249e+06	2.80463e+06	2.81628e+06	2.67189e+06	3.32124e+06	2.8894e+06	2.69733e+06	2.76281e+06	2.92084e+06	58800.2	3.01726e+06	3.0017e+06	2.91744e+06	2.82497e+06	3.00429e+06	30981.6	2.70883e+06	3.17607e+06	2.4834e+06	3.08171e+06	2.75094e+06	3.1389e+06
Temozolomide@6.36-rp	912305	1.11218e+06	1.05725e+06	1.19918e+06	1.08804e+06	1.32957e+06	912684	1.51981e+06	1.18334e+06	1.41093e+06	976293	1.097e+06	1.06201e+06	1.22156e+06	1.4942e+06	956711	1.13532e+06	863125	1.28116e+06	1.28231e+06	1.23013e+06	1.0074e+06	920144	23040.8	1.16296e+06	1.35658e+06	1.32938e+06	1.02836e+06	1.11578e+06	22434.2	1.24651e+06	978771	804189	1.04204e+06	943841	1.0234e+06
5-hydroxyconiferaldehyde@9.247-rp	900187	1.81662e+06	815186	1.43742e+06	1.05185e+06	1.16867e+06	790780	707119	635683	595963	758546	1.16461e+06	407194	614347	539184	680854	939934	1.25616e+06	806432	875728	681557	322456	619898	73479.8	772074	785638	757055	752203	763582	59917.3	501376	816879	82799.9	547181	158491	743107
196.07097@8.463-rp	2.78207e+06	2.87771e+06	2.51419e+06	4.04492e+06	2.74233e+06	3.22989e+06	1.79445e+06	3.71381e+06	2.41988e+06	3.35587e+06	1.74998e+06	2.73989e+06	2.19725e+06	2.36741e+06	2.61272e+06	1.9523e+06	2.3913e+06	2.20571e+06	2.16129e+06	2.25093e+06	2.39722e+06	2.21416e+06	2.33392e+06	15331.7	2.65208e+06	2.72883e+06	2.77248e+06	2.57491e+06	2.61149e+06	75787.8	3.49324e+06	2.52493e+06	2.51313e+06	3.20335e+06	3.66216e+06	2.64353e+06
196.09348@0.95-rp	8.46644e+06	1.30558e+07	1.34821e+07	1.16268e+07	9.52425e+06	8.53845e+06	1.27642e+07	8.36083e+06	1.06787e+07	7.84829e+06	1.04113e+07	1.29455e+07	9.83605e+06	9.62128e+06	7.78329e+06	1.04001e+07	11520420	1.44123e+07	8.95937e+06	1.13841e+07	8.81841e+06	7.4505e+06	1.30566e+07	51119.9	9.20571e+06	1.02822e+07	9.73766e+06	9.85759e+06	1.0388e+07	36043.1	7.14032e+06	8.63804e+06	9.0868e+06	9.01336e+06	7.32738e+06	8.45579e+06
1-carboxy-3-hydroxyadamantane@9.841-rp	927642	1.31262e+06	1.14472e+06	1.44511e+06	1.17417e+06	1.46071e+06	1.06692e+06	1.56785e+06	1.2744e+06	1.32916e+06	989761	1.17919e+06	935345	1.16298e+06	1.25068e+06	1.18369e+06	1.28516e+06	711853	1.26992e+06	1.24378e+06	1.06231e+06	1.11812e+06	1.05725e+06	195937	1.07409e+06	1.17518e+06	1.57231e+06	993322	1.1658e+06	150711	1.28327e+06	1.17207e+06	971454	1.17491e+06	1.16386e+06	1.07196e+06
2509@14.993-rp	4.36329e+06	6.0258e+06	2.72209e+06	4.47582e+06	2.74329e+07	1.64306e+07	1.01326e+07	4.1646e+06	5.37005e+06	7.29396e+06	2.04693e+07	1.36378e+07	560574	1.92556e+06	828348	1.40232e+06	1.67724e+06	1.14664e+06	2.47542e+06	2.93832e+06	2.94363e+06	4.71792e+06	2.61127e+06	845681	6.1141e+06	6.22872e+06	5.28811e+06	5.70694e+06	6.81289e+06	150343	5.17332e+06	9.75053e+06	1.55519e+06	6.13405e+06	2.10603e+06	7.2322e+06
2509@16.22-rp	677277	1.83434e+06	1.96676e+06	673643	3.58714e+06	3.09809e+06	1.39441e+07	3.17157e+06	3.67807e+06	5.74757e+06	9.36383e+06	7.15384e+06	829542	801345	1.73116e+06	1.38802e+06	850273	843976	3.86603e+06	2.15842e+06	1.46193e+06	4.37863e+06	4.38161e+06	75725.4	3.43143e+06	3.56565e+06	3.4028e+06	3.94462e+06	3.46086e+06	65839	6.86701e+06	5.79353e+06	2.30607e+06	6.97189e+06	3.65392e+06	9.5076e+06
196.95352@1.007-rp	749234	845499	1.04641e+06	816170	836114	904235	746169	896800	999147	881293	811641	1.0073e+06	901656	813185	881977	966735	733227	894354	864070	872435	851465	745157	979679	25511.6	790831	873949	905598	904150	1.03203e+06	27506.8	801793	869156	721390	874553	809348	942249
L-Dopa@1.449-rp	814329	1.42393e+06	997171	889737	970398	1.14987e+06	1.33324e+06	999175	1.13624e+06	727222	966603	1.38728e+06	545058	737012	734933	670964	1.10158e+06	984429	1.17468e+06	1.12932e+06	784472	1.00587e+06	1.13451e+06	10912.7	976830	945486	958138	876039	870623	11064.9	913525	956386	564047	987130	509740	1.03068e+06
6-aminohexylphosphate@1.029-rp	6.8265e+06	8.43973e+06	6.7857e+06	8.0487e+06	9.21923e+06	7.25846e+06	5.30997e+06	6.47723e+06	5.76221e+06	7.49768e+06	4.18737e+06	5.57356e+06	7.05485e+06	5.15574e+06	6.24899e+06	5.66757e+06	4.92347e+06	6.08379e+06	5.72307e+06	5.2177e+06	6.58028e+06	5.12846e+06	5.32424e+06	36193.5	5.85102e+06	6.32629e+06	6.41652e+06	5.69061e+06	6.64929e+06	57484.7	6.01809e+06	5.40333e+06	7.63687e+06	8.06077e+06	7.40185e+06	7.46993e+06
197.08963@1.021-rp	3.09738e+06	4.18479e+06	4.12184e+06	3.2439e+06	3.77524e+06	3.48431e+06	3.33938e+06	3.22807e+06	3.93731e+06	3.85829e+06	2.97131e+06	3.29586e+06	3.03781e+06	3.62379e+06	4.34083e+06	4.64845e+06	3.06374e+06	3.40315e+06	4.20126e+06	4.25291e+06	3.98184e+06	3.38545e+06	4.37518e+06	52147.7	3.29111e+06	3.62043e+06	3.79734e+06	3.22436e+06	3.56269e+06	46865.7	4.23804e+06	4.43066e+06	3.10568e+06	3.70251e+06	3.60408e+06	4.3285e+06
197.98146@0.886-rp	2.97018e+06	5.45081e+06	4.70192e+06	2.41879e+06	3.48232e+06	3.31089e+06	3.83056e+06	3.93764e+06	4.35057e+06	2.29657e+06	3.27145e+06	9.34576e+06	3.08177e+06	2.92622e+06	2.38758e+06	2.69704e+06	2.86648e+06	4.19937e+06	3.28542e+06	3.57309e+06	3.49614e+06	3.21553e+06	2.89486e+06	1.34914e+06	3.15933e+06	4.52021e+06	3.70662e+06	3.63076e+06	3.84502e+06	1.40407e+06	3.23607e+06	7.52526e+06	4.49974e+06	4.75687e+06	5.41704e+06	5.1067e+06
Dihydroxydihydrocumicacid@6.345-rp	1.06089e+06	1.43234e+06	1.4643e+06	1.69463e+06	1.49162e+06	1.71949e+06	1.18449e+06	1.86037e+06	1.528e+06	1.64707e+06	1.25217e+06	1.45954e+06	1.50865e+06	1.35693e+06	1.58629e+06	1.24221e+06	1.42376e+06	1.21116e+06	1.45473e+06	1.38497e+06	1.47811e+06	1.37097e+06	1.26688e+06	74454.4	1.62986e+06	1.38308e+06	1.45297e+06	1.32752e+06	1.41741e+06	43860.8	1.58519e+06	1.35233e+06	1.10473e+06	1.38286e+06	1.18485e+06	1.33065e+06
5-Hydroxy-3,4-dimethyl-5-pentyl-2(5H)-furanone@12.166-rp	997841	1.38076e+06	1.01716e+06	1.55441e+06	1.37555e+06	1.45826e+06	1.05262e+06	2.05962e+06	1.30666e+06	1.36885e+06	883482	1.20993e+06	1.02774e+06	1.19814e+06	1.27763e+06	1.04811e+06	1.11779e+06	974290	1.23183e+06	1.10225e+06	1.13439e+06	962515	1.14182e+06	212132	1.19787e+06	1.16215e+06	1.1851e+06	1.00027e+06	1.31771e+06	100385	1.49522e+06	1.22156e+06	1.14491e+06	1.20923e+06	1.12533e+06	1.15843e+06
Dodecenoicacid@17.108-rp	370317	520276	948422	218108	1.59228e+06	1.66681e+06	496611	87452.7	525039	609579	382302	225897	553883	1.11164e+06	1.09752e+06	782107	625494	731394	411603	358280	288720	511617	393419	47012.4	429543	430251	530224	540728	385137	54507.2	359663	229270	506705	523964	1.28974e+06	392143
Dodecenoicacid@16.839-rp	1.37426e+06	2.00474e+06	2.40437e+06	1.57234e+06	4.27343e+06	3.90159e+06	3.27056e+06	1.38216e+06	2.23213e+06	3.44324e+06	2.77725e+06	2.01204e+06	2.64677e+06	3.86767e+06	2.91064e+06	2.40215e+06	2.69665e+06	2.86498e+06	1.63334e+06	2.00716e+06	1.23263e+06	2.64743e+06	2.1132e+06	214777	2.34632e+06	2.32549e+06	2.43735e+06	2.49128e+06	2.72894e+06	70549.7	1.86038e+06	2.00652e+06	2.69666e+06	2.75915e+06	3.72772e+06	2.34777e+06
198.94739@1.012-rp	269881	513734	128624	275051	312648	305362	185965	220847	141460	344946	271544	424862	262850	78504.3	152224	177196	237413	312572	195121	417405	366606	248998	305563	9468.46	235969	251619	265473	203702	282729	9110.17	255240	61736.1	327645	279666	154029	285494
199.03316@0.938-rp	5.99337e+06	7.47835e+06	5.35262e+06	6.65616e+06	5.50692e+06	6.11721e+06	6.3147e+06	8.8402e+06	7.25994e+06	7.27952e+06	7.18713e+06	7.62597e+06	6.41107e+06	5.61617e+06	6.66932e+06	6.16388e+06	6.84652e+06	7.73632e+06	6.89652e+06	5.87596e+06	7.09648e+06	6.24495e+06	5.63563e+06	70558.1	7.002e+06	7.04498e+06	6.96159e+06	6.36748e+06	7.08476e+06	71795.3	4.94924e+06	7.86908e+06	5.80619e+06	6.69447e+06	6.25638e+06	6.48894e+06
199.03437@0.949-rp	872891	704593	730360	433932	617062	645889	666675	932109	846602	642605	507237	434524	349482	676789	645857	555371	699375	723666	747208	680811	721357	538680	569607	46581	773487	767004	742709	605936	884622	54735.3	526364	1.0165e+06	508848	596273	857429	669325
1739990@11.662-rp	438676	1.3178e+06	321206	241469	634459	1.18957e+06	161792	256969	760848	1.16301e+06	90703.2	1.43773e+07	614444	543765	257978	388488	1.05951e+06	927656	904095	2.85093e+06	822712	350989	457640	110196	1.25303e+06	1.4085e+06	1.28374e+06	1.07961e+06	1.24382e+06	119809	946703	551176	1.88378e+06	183060	2.12354e+06	9.58334e+06
clonitrate@0.949-rp	7.50867e+06	7.64716e+06	6.6023e+06	6.9585e+06	8.36548e+06	7.5345e+06	8.06526e+06	8.48397e+06	8.13658e+06	8.18771e+06	7.03085e+06	7.0294e+06	7.84068e+06	6.82518e+06	7.62479e+06	7.56197e+06	7.47004e+06	6.96774e+06	6.97716e+06	7.59252e+06	7.32529e+06	6.72391e+06	7.60243e+06	7072.59	6.97452e+06	7.45271e+06	7.58713e+06	6.64251e+06	7.44147e+06	33821	6.9286e+06	7.37965e+06	5.67689e+06	8.37786e+06	7.22576e+06	7.85634e+06
200.04503@1.092-rp	1.23203e+07	8.47003e+06	1.26247e+07	1.10084e+07	1.32131e+07	1.07789e+07	8.74427e+06	1.25869e+07	8.96127e+06	9.44986e+06	1.00751e+07	1.17315e+07	1.08235e+07	1.25484e+07	1.22499e+07	1.10413e+07	1.14956e+07	1.20938e+07	1.17349e+07	1.05066e+07	1.1899e+07	1.08016e+07	1.27251e+07	14832.9	1.0318e+07	1.06091e+07	1.06643e+07	1.01859e+07	1.24063e+07	14640	1.15055e+07	9.78213e+06	8.25777e+06	2.9697e+06	9.6573e+06	1.22447e+07
BY7900000@8.969-rp	598602	1.1147e+06	639933	869739	830352	871011	391361	379092	459458	409395	323614	720726	352402	506662	301899	316115	488364	428421	320933	504468	362347	497760	432856	21380.9	564785	502671	445245	436320	513779	18548	270254	487582	530617	545402	290280	410397
Dimethyl1,4-cyclohexanedicarboxylate@7.935-rp	976734	914312	958063	1.15173e+06	1.05484e+06	1.15747e+06	688166	1.02757e+06	915459	1.07488e+06	536503	869162	875499	934132	1.02321e+06	946310	509961	847908	664556	788291	831747	812899	856060	55327.3	916611	906460	869221	831502	876427	71207.7	979011	748668	828646	1.16618e+06	879858	842239
Dimethyl1,4-cyclohexanedicarboxylate@8.713-rp	9.73462e+06	1.1076e+07	1.02982e+07	1.26707e+07	1.25026e+07	1.31515e+07	9.01534e+06	1.6166e+07	1.13902e+07	1.35919e+07	9.72816e+06	1.07439e+07	1.0357e+07	1.09827e+07	1.29478e+07	1.07539e+07	1.1362e+07	8.98087e+06	1.34654e+07	1.22353e+07	1.03867e+07	1.08236e+07	1.181e+07	94221.4	1.10414e+07	1.14631e+07	1.12719e+07	1.06561e+07	1.19674e+07	150350	1.34731e+07	1.07249e+07	8.77998e+06	1.14765e+07	1.07673e+07	1.05879e+07
Dimethyl1,4-cyclohexanedicarboxylate@8.902-rp	8.96325e+06	1.17591e+07	1.02161e+07	1.56457e+07	9.21695e+06	1.28147e+07	1.2131e+07	6.59564e+06	1.1281e+07	1.23527e+07	8.02438e+06	1.11379e+07	1.33984e+07	1.23417e+07	1.20939e+07	9.98025e+06	1.40254e+07	8.64213e+06	1.30732e+07	1.06025e+07	1.16437e+07	1.14489e+07	1.12784e+07	141767	1.08455e+07	1.46929e+07	1.18383e+07	1.02969e+07	1.05472e+07	181004	1.1414e+07	1.31175e+07	9.27275e+06	1.06093e+07	9.91521e+06	9.92122e+06
Dimethyl1,4-cyclohexanedicarboxylate@9.594-rp	2.16538e+06	3.37317e+06	2.6331e+06	3.12347e+06	2.97307e+06	3.67103e+06	2.78435e+06	5.20712e+06	3.33135e+06	3.96819e+06	3.61514e+06	3.31639e+06	2.7921e+06	3.3974e+06	3.85842e+06	2.42792e+06	4.61564e+06	2.20496e+06	5.20251e+06	3.4821e+06	3.22826e+06	3.64594e+06	3.03293e+06	195776	3.4381e+06	3.34835e+06	3.25076e+06	3.18239e+06	3.53821e+06	138833	5.51072e+06	3.8284e+06	2.22167e+06	2.84944e+06	3.38857e+06	2.727e+06
200.94866@1.397-rp	2.3266e+06	2.77759e+06	3.60294e+06	2.78421e+06	3.16754e+06	3.20716e+06	2.75926e+06	2.55245e+06	2.71619e+06	2.70537e+06	2.83746e+06	2.34066e+06	2.36622e+06	2.56425e+06	2.50622e+06	2.05681e+06	2.8777e+06	2.41479e+06	2.54253e+06	2.30449e+06	2.84308e+06	2.58249e+06	2.88961e+06	288121	2.46084e+06	2.66778e+06	2.76586e+06	2.90422e+06	2.44888e+06	122099	2.91296e+06	3.17567e+06	3.17068e+06	3.71925e+06	2.72181e+06	2.50561e+06
Sulfocysteine@1.054-rp	2.34521e+06	4.33753e+06	3.86166e+06	2.72316e+06	2.50071e+06	2.2755e+06	2.04005e+06	3.15901e+06	2.33387e+06	2.20593e+06	2.02298e+06	1.21988e+06	2.69155e+06	2.44547e+06	2.13417e+06	2.2861e+06	1.97375e+06	3.24014e+06	1.40365e+06	1.82293e+06	1.15547e+06	1.35149e+06	2.53523e+06	29908.1	2.1668e+06	2.34018e+06	2.23767e+06	2.13667e+06	2.46675e+06	28776.4	2.11619e+06	1.51395e+06	2.88952e+06	2.03611e+06	2.22268e+06	1.10291e+06
201.04842@0.823-rp	1.05927e+07	1.45308e+07	1.42527e+07	1.1961e+07	1.24411e+07	1.40726e+07	1.47228e+07	1.31253e+07	1.16826e+07	1.31436e+07	1.10814e+07	1.2047e+07	1.22263e+07	1.09906e+07	9.86874e+06	1.01045e+07	1.10262e+07	1.17277e+07	1.04353e+07	1.2779e+07	1.12206e+07	1.08507e+07	1.25154e+07	1.23881e+06	1.14316e+07	1.21339e+07	1.29499e+07	1.13236e+07	1.25031e+07	1.07063e+06	1.30045e+07	1.47779e+07	1.46426e+07	16660754	1.10715e+07	1.43054e+07
(S)-1-BOC-3-HYDROXYPIPERIDINE@9.172-rp	405754	483371	389205	492669	449852	560948	445014	624119	449910	503200	396000	436288	443553	454937	480947	395213	458197	395562	597553	565194	454918	376297	463384	14550.7	424671	495442	467847	419701	501016	14472.4	560495	398904	329330	423280	430515	389524
201.95236@0.925-rp	7.13614e+06	7.14112e+06	8.33432e+06	5.78083e+06	6.91587e+06	5.66147e+06	5.70345e+06	6.9577e+06	7.60081e+06	7.02691e+06	6.42843e+06	1.14976e+07	6.60602e+06	6.45436e+06	6.36e+06	5.79295e+06	7.40167e+06	7.63082e+06	4.70999e+06	5.38094e+06	6.55874e+06	6.03754e+06	7.63722e+06	363026	6.06337e+06	7.76943e+06	7.01439e+06	6.74241e+06	7.10593e+06	634721	5.56626e+06	7.24573e+06	7.27179e+06	6.55286e+06	8.11682e+06	7.34053e+06
201.96177@0.934-rp	2.88772e+07	4.57758e+07	2.65373e+07	3.20219e+07	3.83665e+07	3.35262e+07	3.1884e+07	3.23092e+07	2.84537e+07	3.39281e+07	3.31959e+07	4.04002e+07	2.85017e+07	2.80676e+07	2.83175e+07	3.1474e+07	3.37063e+07	3.85639e+07	30030684	4.79869e+07	3.9629e+07	3.15956e+07	3.57333e+07	152069	3.64767e+07	3.56074e+07	3.61393e+07	2.99707e+07	3.73098e+07	260957	3.13243e+07	3.036e+07	3.22376e+07	3.92291e+07	2.59469e+07	3.52233e+07
4-Hydroxy-3,5-dimethylbenzenesulfonicacid@10.153-rp	127845	115739	150296	135952	126981	162226	782361	148082	379432	7.7301e+06	6.53682e+06	7.21633e+06	121358	140470	122145	132273	134304	128867	165583	4.29664e+06	3.31117e+06	644390	145497	128388	581662	601475	560191	569536	574714	25134.1	141360	123362	140196	103848	118448	26693
202.03282@0.815-rp	1.40157e+07	1.8705e+07	1.85521e+07	1.54687e+07	1.77076e+07	2.01888e+07	2.02095e+07	1.68763e+07	1.58323e+07	1.73174e+07	1.52735e+07	1.68904e+07	1.6995e+07	1.46514e+07	1.35326e+07	1.33536e+07	1.62808e+07	1.63249e+07	1.36504e+07	1.65117e+07	1.41828e+07	1.49764e+07	1.66267e+07	1.82317e+06	1.69026e+07	1.78486e+07	1.74954e+07	1.66521e+07	1.63999e+07	1.54782e+06	1.82808e+07	1.99912e+07	1.95296e+07	2.26957e+07	1.56649e+07	1.89034e+07
DA9185000@0.976-rp	235680733	2.68518e+08	3.45476e+08	2.2361e+08	2.72641e+08	2.38664e+08	3.13762e+08	2.70496e+08	3.3048e+08	2.6716e+08	2.82901e+08	3.48849e+08	3.81016e+08	4.01965e+08	3.09927e+08	3.06195e+08	261644868	3.11558e+08	3.02831e+08	4.07097e+08	2.16818e+08	2.14178e+08	3.27636e+08	43671.8	3.47635e+08	2.49283e+08	280972983	2.78478e+08	2.82397e+08	28174.5	302733828	3.85158e+08	2.04574e+08	3.02676e+08	2.84302e+08	3.52533e+08
202.04519@0.925-rp	4.94835e+06	4.45829e+06	5.11557e+06	2.98502e+06	3.87059e+06	3.34246e+06	5.81266e+06	4.16074e+06	4.67706e+06	3.27042e+06	3.21204e+06	3.23103e+06	5.19115e+06	4.9045e+06	3.15643e+06	3.69713e+06	3.3912e+06	3.02012e+06	4.89912e+06	5.29831e+06	3.22922e+06	3.82027e+06	3.62664e+06	256105	5.55527e+06	4.70797e+06	4.04914e+06	3.19265e+06	3.7241e+06	28620	5.13419e+06	4.74526e+06	4.24272e+06	4.50202e+06	3.54206e+06	470287
DA9185000@1.279-rp	3.86535e+07	3.36515e+07	2.52618e+07	3.4424e+07	3.76597e+07	3.70071e+07	3.64284e+07	3.20277e+07	3.53722e+07	3.54074e+07	4.01408e+07	4.1487e+07	3.75028e+07	3.4946e+07	3.40449e+07	3.64939e+07	3.49188e+07	3.66092e+07	2.88265e+07	3.76672e+07	4.12941e+07	3.44765e+07	2.92329e+07	41572.2	3.2972e+07	3.37836e+07	3.64775e+07	3.63154e+07	3.72661e+07	43161.5	3.28771e+07	3.05383e+07	3.15153e+07	3.7993e+07	3.85976e+07	3.76982e+07
Diethyloxoglutaricacid@4.865-rp	1.62101e+06	1.98262e+06	1.73692e+06	2.34384e+06	1.64533e+06	2.04536e+06	1.67998e+06	2.74592e+06	2.07956e+06	2.22457e+06	1.67175e+06	1.90187e+06	1.92636e+06	2.00666e+06	2.16992e+06	1.58554e+06	1.84796e+06	1.63851e+06	2.11079e+06	1.9518e+06	1.83225e+06	1.81242e+06	1.65015e+06	51260.8	1.93479e+06	1.96991e+06	1.96482e+06	1.68426e+06	1.98744e+06	46401.5	2.42679e+06	1.70537e+06	1.62912e+06	1.85349e+06	1.76894e+06	1.6879e+06
Diethyloxoglutaricacid@4.205-rp	2.22084e+06	2.84282e+06	2.34144e+06	3.20295e+06	2.62695e+06	3.30844e+06	2.43049e+06	4.03469e+06	2.7939e+06	3.22724e+06	2.37852e+06	2.68205e+06	2.70801e+06	2.88472e+06	3.04175e+06	2.38838e+06	2.66192e+06	2.40431e+06	3.13329e+06	2.57089e+06	2.5368e+06	2.50992e+06	2.55413e+06	44594.7	2.60799e+06	2.71645e+06	2.84167e+06	2.51836e+06	2.82042e+06	48421.4	3.20755e+06	2.66878e+06	2.24429e+06	2.68095e+06	2.54987e+06	2.35308e+06
Diethyloxoglutaricacid@4.64-rp	2.62975e+06	3.07795e+06	2.69136e+06	3.35278e+06	3.7457e+06	4.24579e+06	2.68455e+06	4.21034e+06	3.05719e+06	3.41308e+06	2.55175e+06	3.04571e+06	2.865e+06	3.23929e+06	3.75705e+06	2.79593e+06	2.88167e+06	2.5956e+06	3.26716e+06	3.06614e+06	2.95237e+06	2.7618e+06	2.53674e+06	51964.5	2.83663e+06	3.1171e+06	2.90944e+06	2.83215e+06	2.77647e+06	58104.9	3.76275e+06	2.75454e+06	2.64867e+06	3.0236e+06	2.87324e+06	2.73303e+06
Diethyladipicacid@11.065-rp	7.70295e+07	9.5622e+07	9.22528e+07	1.17607e+08	9.10254e+07	1.13607e+08	7.48964e+07	1.24177e+08	8.85749e+07	9.88786e+07	7.08587e+07	9.083e+07	7.97971e+07	7.95267e+07	9.24331e+07	7.34869e+07	8.33626e+07	7.57835e+07	9.02962e+07	7.87503e+07	8.10711e+07	8.31393e+07	8.50752e+07	7.91346e+06	9.20144e+07	9.92311e+07	9.38348e+07	8.78246e+07	9.10509e+07	8.84992e+06	1.14643e+08	8.34674e+07	7.5781e+07	9.38424e+07	9.36041e+07	7.97953e+07
Diethyladipicacid@12.071-rp	1.738e+06	2.33392e+06	1.2321e+06	1.59825e+06	2.77417e+06	2.74698e+06	1.97936e+06	2.12305e+06	2.3088e+06	2.37599e+06	1.98275e+06	1.79434e+06	2.1512e+06	2.44554e+06	2.13698e+06	2.35132e+06	2.99412e+06	1.63959e+06	2.52813e+06	2.70491e+06	1.99469e+06	2.66086e+06	2.03971e+06	314190	2.31377e+06	2.40384e+06	2.20897e+06	2.17306e+06	2.45012e+06	369249	1.81066e+06	1.58946e+06	1.49523e+06	2.17362e+06	1.95193e+06	1.58885e+06
Diethyladipicacid@7.969-rp	465321	1.06404e+06	815056	855799	881636	773738	822246	642887	918253	710938	694108	760529	649088	591537	726741	638273	783241	969174	759749	874916	707767	742569	806736	73952	724840	729786	724366	814718	854316	56234.3	821204	857657	651339	819481	432359	902879
Dimethylarginine@1.019-rp	2.88027e+06	3.4426e+06	3.24294e+06	2.35348e+06	2.59815e+06	3.18054e+06	2.62617e+06	2.65576e+06	2.90544e+06	2.60301e+06	2.14966e+06	3.30131e+06	3.21387e+06	2.70868e+06	2.55527e+06	3.05603e+06	2.65942e+06	2.55299e+06	1.90515e+06	2.37871e+06	2.0556e+06	2.13167e+06	2.2805e+06	18381	2.64543e+06	2.48804e+06	2.58017e+06	2.53048e+06	2.55472e+06	16487.9	2.29539e+06	2.18894e+06	2.8421e+06	2.59445e+06	2.32542e+06	1.92103e+06
MFCD00041564@12.767-rp	468403	420715	400045	509271	411953	624241	399341	733997	452187	653021	355930	579049	361026	440851	443764	434389	440883	356333	732334	449446	461787	458531	570391	89921	417878	452328	527984	434482	516798	87314.7	638147	395454	363901	475591	384083	430482
202.96399@1.274-rp	9.13973e+06	8.45095e+06	6.19163e+06	8.65407e+06	8.78643e+06	8.75182e+06	8.7207e+06	7.23871e+06	8.10822e+06	8.34667e+06	9.29989e+06	1.02022e+07	8.29351e+06	7.69917e+06	8.1596e+06	8.92073e+06	8.15824e+06	9.81408e+06	6.04504e+06	8.9782e+06	9.71875e+06	7.85557e+06	7.07954e+06	102436	8.50613e+06	7.62142e+06	8.29133e+06	6.96427e+06	8.80472e+06	132181	8.58153e+06	6.95229e+06	5.70682e+06	9.3594e+06	8.9513e+06	8.755e+06
203.04829@0.974-rp	1.66013e+07	1.96144e+07	2.16759e+07	1.55995e+07	1.63137e+07	1.64217e+07	1.99685e+07	1.75251e+07	2.32611e+07	1.71311e+07	1.95882e+07	2.1368e+07	2.3995e+07	2.21146e+07	1.87275e+07	2.08468e+07	1.64053e+07	2.11232e+07	2.10598e+07	2.44778e+07	1.4891e+07	1.60745e+07	2.13803e+07	9673.16	2.05838e+07	1.72685e+07	2.09742e+07	1.70817e+07	1.62857e+07	10429.7	1.8564e+07	2.35224e+07	1.30512e+07	1.98514e+07	21527434	2.24458e+07
203.05592@1.454-rp	1.84546e+06	2.759e+06	2.22022e+06	2.40362e+06	2.22527e+06	2.91749e+06	2.60356e+06	2.50254e+06	2.70211e+06	1.91833e+06	2.43082e+06	3.25564e+06	1.52933e+06	1.79089e+06	1.8504e+06	1.94558e+06	2.59532e+06	2.55005e+06	2.86206e+06	2.63297e+06	1.9839e+06	2.23185e+06	2.63394e+06	34503.1	2.05651e+06	1.98829e+06	2.26591e+06	2.15886e+06	2.1788e+06	24461.3	1.98832e+06	2.24202e+06	1.48186e+06	2.43399e+06	1.39306e+06	2.62078e+06
Acetylcarnitine@1.235-rp	8.00714e+07	1.09106e+08	1.65325e+08	9.22439e+07	1.2905e+08	1.11328e+08	9.02976e+07	7.53669e+07	8.63703e+07	9.72572e+07	8.9926e+07	9.22448e+07	1.23614e+08	1.16674e+08	1.18384e+08	1.14962e+08	9.07054e+07	1.03703e+08	8.3106e+07	9.7819e+07	7.82354e+07	9.0722e+07	1.03927e+08	30604.3	1.03052e+08	1.02537e+08	1.08175e+08	9.19248e+07	1.03299e+08	28774.5	103535345	8.81626e+07	1.33468e+08	125389792	1.61612e+08	8.47061e+07
3-Carboxylato-1,3,5-trideoxy-5-(trimethylammonio)pent-2-ulose@7.558-rp	1.29329e+06	2.40641e+06	1.49033e+06	2.8317e+06	1.65124e+06	2.33015e+06	2.34065e+06	3.05143e+06	1.92173e+06	2.49884e+06	1.78736e+06	2.50644e+06	2.41642e+06	2.39959e+06	2.03486e+06	1.48052e+06	2.35578e+06	2.28206e+06	2.32647e+06	2.27707e+06	2.28726e+06	2.00632e+06	1.77338e+06	37363.2	2.03125e+06	2.09251e+06	1.99671e+06	1.83786e+06	2.14457e+06	41110.2	1.77181e+06	1.41798e+06	1.43481e+06	1.97617e+06	1.19514e+06	1.55291e+06
204.02142@1.284-rp	3.37421e+06	2.79221e+06	2.08354e+06	2.9055e+06	2.88582e+06	2.93938e+06	3.38529e+06	2.96231e+06	2.90411e+06	2.79983e+06	3.21899e+06	3.00343e+06	3.34709e+06	3.02958e+06	3.05768e+06	3.07453e+06	2.79091e+06	2.92412e+06	2.78924e+06	3.17518e+06	3.40092e+06	2.97141e+06	2.44288e+06	39728.4	3.17943e+06	3.10676e+06	2.91884e+06	2.95109e+06	2.87999e+06	36898.1	3.06511e+06	2.78748e+06	2.90049e+06	2.98579e+06	3.13169e+06	2.8789e+06
204.02787@0.984-rp	8.88396e+06	9.15778e+06	7.33699e+06	8.11355e+06	7.66763e+06	7.07683e+06	9.65599e+06	1.25654e+07	9.33456e+06	9.75451e+06	8.72597e+06	1.17872e+07	1.06118e+07	9.6711e+06	9.51116e+06	8.92801e+06	1.1466e+07	9.19831e+06	7.19057e+06	7.67975e+06	9.71188e+06	1.00007e+07	8.16145e+06	11901.6	9.28704e+06	9.83243e+06	9.54141e+06	9.01655e+06	9.67502e+06	11249.4	9.45945e+06	8.70978e+06	1.16968e+07	9.79336e+06	1.09796e+07	8.87629e+06
D-gamma-Glu-Gly@1.045-rp	1.74851e+06	3.17462e+06	2.13914e+06	1.93893e+06	2.40423e+06	2.12604e+06	1.62751e+06	1.3714e+06	1.84458e+06	1.5013e+06	1.53455e+06	1.5553e+06	1.49154e+06	1.13553e+06	1.20518e+06	1.23705e+06	1.74638e+06	1.62931e+06	1.3169e+06	1.46573e+06	1.31063e+06	1.38579e+06	1.34196e+06	117174	1.6365e+06	1.46758e+06	1.52372e+06	1.68921e+06	1.69799e+06	113982	1.39196e+06	1.36893e+06	1.51585e+06	1.8151e+06	1.02276e+06	1.78442e+06
2-oxo-8-methylthiooctanoicacid@0.984-rp	1.40304e+07	2.41461e+07	2.20737e+07	2.53655e+07	1.83257e+07	3.10135e+07	1.32304e+07	2.51871e+07	2.40284e+07	2.46615e+07	1.39589e+07	2.00724e+07	1.61514e+07	2.20789e+07	1.99166e+07	1.32463e+07	1.60399e+07	1.59216e+07	1.64783e+07	1.72254e+07	1.31393e+07	1.51862e+07	1.73479e+07	17362.1	2.49411e+07	1.60459e+07	1.90122e+07	1.73838e+07	1.46675e+07	18720	2.41121e+07	2.08033e+07	1.06764e+07	1.44364e+07	1.72794e+07	1.98225e+07
Tryptophan@3.059-rp	6.36476e+08	7.77191e+08	5.40654e+08	673515871	5.66701e+08	5.19576e+08	4.50988e+08	6.25753e+08	4.43242e+08	3.79099e+08	3.40816e+08	6.13378e+08	4.48355e+08	4.37065e+08	3.87666e+08	4.89011e+08	5.23501e+08	6.05082e+08	5.15533e+08	5.56687e+08	5.2667e+08	4.83978e+08	5.14731e+08	556523	5.03935e+08	5.1939e+08	5.04649e+08	4.78868e+08	4.9898e+08	289130	4.88155e+08	5.40245e+08	3.69356e+08	667227556	2.67806e+08	5.50866e+08
MFCD00223933@7.503-rp	2.24708e+07	3.04202e+07	2.50933e+07	3.53326e+07	2.82802e+07	3.52921e+07	2.69562e+07	4.07386e+07	2.96502e+07	3.50384e+07	2.8128e+07	3.0914e+07	3.04872e+07	3.36598e+07	3.31855e+07	2.474e+07	3.38781e+07	2.7691e+07	3.63019e+07	3.15101e+07	2.95112e+07	2.93419e+07	2.75919e+07	186791	2.86068e+07	3.09824e+07	3.12847e+07	2.6655e+07	3.00735e+07	180945	3.55349e+07	2.7051e+07	2.15814e+07	2.86421e+07	2.52942e+07	2.81695e+07
MFCD00223933@6.484-rp	6.2725e+07	4.50143e+07	6.59975e+07	6.09905e+07	6.84778e+07	6.86369e+07	3.0887e+07	6.38942e+07	6.09289e+07	5.66549e+07	5.48814e+07	3.76528e+07	4.12429e+07	4.80041e+07	7.88168e+07	6.61676e+07	4.59132e+07	4.10433e+07	6.17148e+07	4.65188e+07	4.69722e+07	4.46908e+07	4.99098e+07	357402	5.3183e+07	5.64538e+07	5.96577e+07	5.25616e+07	5.76487e+07	318312	8.16547e+07	6.15082e+07	5.07746e+07	6.25814e+07	7.37673e+07	5.7467e+07
MFCD00223933@7.654-rp	5.83415e+06	7.69723e+06	6.33305e+06	9.28179e+06	7.02885e+06	7.81813e+06	5.83566e+06	9.90123e+06	4.19556e+06	8.4752e+06	3.86102e+06	6.82681e+06	6.74529e+06	4.32489e+06	7.70282e+06	5.72264e+06	6.64319e+06	5.07897e+06	6.90315e+06	6.55961e+06	6.95604e+06	4.17697e+06	3.91432e+06	113790	6.75777e+06	6.19164e+06	5.18462e+06	6.21426e+06	6.96667e+06	111005	5.05363e+06	4.28267e+06	6.13945e+06	6.82828e+06	6.34821e+06	5.35903e+06
5-methoxyindoleaceticacid@8.364-rp	7.99905e+06	7.57385e+06	4.78675e+06	6.92223e+06	9.48688e+06	8.25811e+06	6.79747e+06	6.92812e+06	9.35305e+06	6.57698e+06	8.46078e+06	7.65195e+06	6.62756e+06	7.83185e+06	9.08756e+06	6.32009e+06	1.14337e+07	8.50553e+06	9.02393e+06	1.01469e+07	9.49789e+06	8.54503e+06	6.72891e+06	52409.3	8.41791e+06	8.30617e+06	7.80351e+06	7.06244e+06	6.76969e+06	49470.7	7.011e+06	8.91658e+06	5.1563e+06	6.31898e+06	4.48641e+06	7.54113e+06
5-methoxyindoleaceticacid@9.227-rp	53109.2	37296.7	36569.3	36460.6	42789	35536	72071.6	43821.3	121590	47702	101040	54869.2	42205.2	44020.5	50067.8	38025	40012.2	60023.8	62701.3	120475	82078.8	72098	52860.1	37972.5	880070	850134	925864	834300	946428	36239.6	5.23111e+06	5.44997e+06	4.24469e+06	3.0799e+06	4.01709e+06	4.64592e+06
Pantothenol@3.144-rp	79003.3	368750	115382	77392.2	260669	95787.1	121981	102318	111590	86346.1	237795	175076	94854.6	73900.2	137091	86050.5	469877	327995	93898.7	147482	149926	61613	146720	400427	1.00049e+07	1.02723e+07	1.01293e+07	9.03974e+06	1.0241e+07	426312	100568	358323	195398	203327	299881	135790
207.00957@1.194-rp	404191	501904	570185	447433	421854	381028	503955	758774	500088	603489	558082	660717	416260	452349	471830	531090	542734	640810	638634	562547	466445	498959	500352	8614.76	483063	537158	517797	488253	537983	8337.07	392900	440676	332798	509460	365733	523829
1-nitro-5,6-dihydroxy-dihydronaphthalene@6.541-rp	156656	249496	186804	214280	375566	303322	1.65645e+06	534220	871469	710879	1.88711e+06	1.44109e+06	698327	1.31212e+06	968011	726471	1.30035e+06	867798	1.24715e+06	2.17568e+06	943641	1.63784e+06	1.46501e+06	36715.1	889255	891706	923882	910344	812683	34286.8	653012	864472	185616	256593	240849	548800
(S)-a,2-diamino-g-oxo-Benzenebutanoate@9.844-rp	1.61011e+06	1.91289e+06	1.60241e+06	2.40566e+06	1.73854e+06	2.34422e+06	1.50869e+06	2.40103e+06	1.70925e+06	2.26354e+06	1.35877e+06	1.72986e+06	1.31958e+06	1.57963e+06	1.75725e+06	1.40254e+06	1.91873e+06	1.49702e+06	1.61938e+06	1.52476e+06	1.59911e+06	1.50656e+06	1.48263e+06	36093.6	1.65087e+06	1.66003e+06	1.89248e+06	1.56047e+06	2.08079e+06	30538.6	2.3395e+06	1.6941e+06	1.64879e+06	2.03206e+06	1.89547e+06	1.76922e+06
N-acetylphenylalanine@8.11-rp	2.34645e+06	3.73713e+06	2.08644e+06	3.16943e+06	3.01795e+06	2.49177e+06	2.80762e+06	2.24679e+06	3.26189e+06	2.4108e+06	2.35275e+06	2.91681e+06	2.0093e+06	3.34513e+06	2.24344e+06	2.02228e+06	3.30989e+06	3.05864e+06	2.31446e+06	3.10705e+06	2.87762e+06	2.25309e+06	3.1836e+06	44761.6	2.55944e+06	2.67286e+06	2.69069e+06	2.36076e+06	2.64012e+06	40700.2	2.68996e+06	2.91649e+06	2.00695e+06	2.73011e+06	1.35328e+06	2.89903e+06
207.94617@1.115-rp	6.57174e+06	6.48106e+06	6.85836e+06	6.21365e+06	5.81328e+06	6.7048e+06	5.52624e+06	5.39973e+06	6.57299e+06	5.94386e+06	5.21359e+06	6.18654e+06	5.41917e+06	5.6624e+06	6.58829e+06	5.47726e+06	7.12029e+06	5.97793e+06	5.82981e+06	4.83747e+06	6.73757e+06	5.9502e+06	6.52744e+06	984696	5.15258e+06	5.50077e+06	7.16854e+06	5.4312e+06	7.37456e+06	994771	4.88084e+06	5.65265e+06	7.00202e+06	6.47557e+06	6.92798e+06	5.44172e+06
208.04825@1.417-rp	687488	784090	715062	651859	703009	704654	557164	729106	739385	766446	648154	655416	871092	802192	710423	727537	738517	677096	588895	552141	620257	646722	596267	14054.9	664111	699136	728160	576067	682790	14823.9	578841	736656	748983	823520	737874	682482
208.0534@0.916-rp	7.91911e+06	1.09667e+07	9.22118e+06	1.28426e+07	7.85162e+06	1.64375e+07	6.53801e+06	1.27387e+07	1.00265e+07	1.26459e+07	8.47161e+06	5.65845e+06	5.61459e+06	9.09066e+06	1.13636e+07	5.93257e+06	6.66142e+06	8.09247e+06	7.22176e+06	6.49806e+06	8.5018e+06	8.42617e+06	9.2183e+06	1.01475e+06	7.59157e+06	1.00276e+07	8.33979e+06	7.09681e+06	9.61624e+06	52529.8	1.13548e+07	9.18735e+06	7.09744e+06	6.5907e+06	8.89745e+06	8.95787e+06
[truncated: 1,173 more rows]

## Sheet: AreaQCCorr
	plasma-690-ATB_25	plasma-692-ATB_27	plasma-686-ATB_21	plasma-688-ATB_23	plasma-691-ATB_26	plasma-694-ATB_29	plasma-666-FMT_1	plasma-670-FMT_5	plasma-683-FMT_18	plasma-682-FMT_17	plasma-678-FMT_13	plasma-669-FMT_4	plasma-668-FMT-AKK_3	plasma-675-FMT-AKK_10	plasma-680-FMT-AKK_15	plasma-679-FMT-AKK_14	plasma-672-FMT-AKK_7	plasma-674-FMT-AKK_9	plasma-667-FMT-AKK-Pas_2	plasma-681-FMT-AKK-Pas_16	plasma-676-FMT-AKK-Pas_11	plasma-677-FMT-AKK-Pas_12	plasma-671-FMT-AKK-Pas_6	Bl_matrice-plasma_3a	QC_plasma_4a	QC_plasma_4b	QC_plasma_4c	QC_plasma_4d	QC_plasma_4e	Bl_matrice-plasma_3b	plasma-684-SPF_19	plasma-685-SPF_20	plasma-689-SPF_24	plasma-687-SPF_22	plasma-693-SPF_28	plasma-695-SPF_30
[truncated: 1,713 more rows]

[truncated: 2 more sheets: FoldChangeLog2, pvalue]
