# Supplementary material for: Oral administration of Akkermansia muciniphila elevates systemic antiaging and anticancer metabolites
Source: Aging (Albany NY). 2021 Mar 2;13(5):6375–405. doi: 10.18632/aging.202739 (PMC7993698; doi:10.18632/aging.202739)
Supplement: Supplementary Table 9 [file aging-13-202739-s010.xlsx]

## Sheet: SampleInfos
Supplementary Table 9. Related to Supplementary Figures 15, 16. Targeted metabolomics analysis from ILEUM samples from mice receiving oral gavages with Akk or Akk-past.
Sid	sType	InjOrder	Grp	Color
BlM_pre	Bl	5	-	-
BlM_post	Bl	46	-	-
QC_ileon_5a	QC	6	QC	#737373
QC_ileon_6a	QC	7	QC	#737373
QC_ileon_5b	QC	15	QC	#737373
QC_ileon_6b	QC	16	QC	#737373
QC_ileon_5c	QC	24	QC	#737373
QC_ileon_6c	QC	25	QC	#737373
QC_ileon_5d	QC	33	QC	#737373
QC_ileon_6d	QC	34	QC	#737373
QC_ileon_5e	QC	44	QC	#737373
QC_ileon_6e	QC	45	QC	#737373
ileon-666-FMT_61	Sa	8	FMT Ileon	#9E9AC8
ileon-667-FMT-AKK-Pas_62	Sa	9	FMT AKK Pas Ileon	#54278F
ileon-684-SPF_79	Sa	10	SPF Ileon	#74C476
ileon-668-FMT-AKK_63	Sa	11	FMT AKK Ileon	#7960AB
ileon-690-ATB_85	Sa	12	ATB Ileon	#FB6A4A
ileon-681-FMT-AKK-Pas_76	Sa	13	FMT AKK Pas Ileon	#54278F
ileon-670-FMT_65	Sa	14	FMT Ileon	#9E9AC8
ileon-685-SPF_80	Sa	17	SPF Ileon	#74C476
ileon-675-FMT-AKK_70	Sa	18	FMT AKK Ileon	#7960AB
ileon-692-ATB_87	Sa	19	ATB Ileon	#FB6A4A
ileon-683-FMT_78	Sa	20	FMT Ileon	#9E9AC8
ileon-689-SPF_84	Sa	21	SPF Ileon	#74C476
ileon-680-FMT-AKK_75	Sa	22	FMT AKK Ileon	#7960AB
ileon-686-ATB_81	Sa	23	ATB Ileon	#FB6A4A
ileon-676-FMT-AKK-Pas_71	Sa	26	FMT AKK Pas Ileon	#54278F
ileon-682-FMT_77	Sa	27	FMT Ileon	#9E9AC8
ileon-688-ATB_83	Sa	28	ATB Ileon	#FB6A4A
ileon-687-SPF_82	Sa	29	SPF Ileon	#74C476
ileon-679-FMT-AKK_74	Sa	30	FMT AKK Ileon	#7960AB
ileon-673-FMT-AKK-Pas_68	Sa	31	FMT AKK Pas Ileon	#54278F
ileon-691-ATB_86	Sa	32	ATB Ileon	#FB6A4A
ileon-678-FMT_73	Sa	35	FMT Ileon	#9E9AC8
ileon-677-FMT-AKK-Pas_72	Sa	36	FMT AKK Pas Ileon	#54278F
ileon-693-SPF_88	Sa	37	SPF Ileon	#74C476
ileon-672-FMT-AKK_67	Sa	38	FMT AKK Ileon	#7960AB
ileon-694-ATB_89	Sa	39	ATB Ileon	#FB6A4A
ileon-671-FMT-AKK-Pas_66	Sa	40	FMT AKK Pas Ileon	#54278F
ileon-695-SPF_90	Sa	41	SPF Ileon	#74C476
ileon-669-FMT_64	Sa	43	FMT Ileon	#9E9AC8
St_mix_pre	St	1	-	-
St_BA1_pre	St	2	-	-
St_AA_pre	St	3	-	-
St_BA2_pre	St	4	-	-
St_AA_post	St	47	-	-
St_BA2_post	St	48	-	-
St_BA1_post	St	49	-	-

## Sheet: MetabolitesInfos
Analyte	MetName	RT	Class	MF	Mass	HMDB	KEGG	PC	Chebi	OGName	PCu	Method
2-aminoadipic acid@15.18-gc	2-aminoadipic acid	15.179	Amino acids	C6H11NO4	161.069	HMDB00510	C00956	469;59366488;92136	chebiId:37023	2-aminoadipic acid	469	gc
2-hydroxy-3-methylbutyric acid@4.58-sf	2-hydroxy-3-methylbutyric acid	4.575	Fatty Acyls	C5H10O3	118.063	-	-	5289545	-	2-hydroxy-2-methylbutyric acid	5289545	sf
2-hydroxybutyric acid@2.49-sf	2-hydroxybutyric acid	2.487	Organic acids	C4H8O3	104.047	HMDB00008	C05984	440864;11266	chebiId:1148;chebiId:50613	2-hydroxybutyric acid	11266	sf
2-hydroxyglutaric acid@13.17-gc	2-hydroxyglutaric acid	13.171	Organic acids	C5H8O5	148.037	HMDB00606;HMDB59655	C02630;C01087	43	chebiId:17084	2-hydroxyglutaric acid	43	gc
2-oxoglutaric acid@13.19-gc	2-oxoglutaric acid	13.185	Organic acids	C5H6O5	146.022	HMDB00208	C00026	51	chebiId:30915	2-oxoglutaric acid	51	gc
3-hydroxybutyric acid@1.66-sf	3-hydroxybutyric acid	1.656	Organic acids	C4H8O3	104.047	HMDB00357;HMDB00011	C01089	441;92135	chebiId:10983;chebiId:17066;chebiId:20067	3-hydroxybutyric acid	441	sf
3-indoxyl sulfuric acid@4.81-qpneg	3-indoxyl sulfuric acid	4.808	Organic acids	C8H7NO4S	213.01	HMDB00682	-	10258	-	3-indoxyl sulfuric acid	10258	qpneg
3-methylhistidine@0.99-qppos	3-methylhistidine	0.992	Amino acids	C7H11N3O2	169.085	HMDB00479	C01152	64969;565965	chebiId:27596	3-methylhistidine	565965	qppos
4-hydroxymandelic acid@15.38-gc	4-hydroxymandelic acid	15.385	Unclassified	C8H8O4	168.042	HMDB00822	C11527	328	chebiId:16388	4-hydroxymandelic acid	328	gc
4-hydroxyproline@12.60-gc	4-hydroxyproline	12.604	Amino acids	C5H9NO3	131.058	HMDB00725	C01157	825;5810;5238478	chebiId:18095	4-hydroxyproline	5238478	gc
5-aminovaleric acid@13.70-gc	5-aminovaleric acid	13.697	Amino acids	C5H11NO2	117.079	HMDB03355	C00431	138;6992101	chebiId:15887	5-aminovaleric acid	138	gc
5-oxoproline@12.53-gc	5-oxoproline	12.531	Amino acids	C5H7NO3	129.043	HMDB00805;HMDB00267	C02237;C01879	439685;499;7405	chebiId:16010;chebiId:16924;chebiId:18183	5-oxoproline	499	gc
7,12-dihydroxy-3-oxocholanoic acid@7.12-ba	7,12-dihydroxy-3-oxocholanoic acid	7.119	Steroids	C24H38O5	406.272	-	-	5283956	-	Dehydrocholic acid	5283956	ba
Acetic acid@1.78-sf	Acetic acid	1.783	Organic acids	C2H4O2	60.021	HMDB00042	C00033	176;21980959	chebiId:15366	Acetic acid	176	sf
Acetylcarnitine@1.23-qppos	Acetylcarnitine	1.23	Fatty Acyls	C9H17NO4	203.116	HMDB00201	C02571	7045767;439756;1	chebiId:15960;chebiId:57589	Acetylcarnitine	1	qppos
Acetylcholine@1.07-qppos	Acetylcholine	1.069	Unclassified	C7H15NO2	145.11	HMDB00895	C01996	187	chebiId:15355	Acetylcholine	187	qppos
Adenine@16.39-gc	Adenine	16.387	Bases	C5H5N5	135.054	HMDB00034	C00147	190	chebiId:16708	Adenine	190	gc
Alanine@7.03-gc	Alanine	7.025	Amino acids	C3H7NO2	89.048	HMDB01310;HMDB00161	C00133;C00041	71080;602;5950;7311724;57383916	chebiId:15570;chebiId:16977	Alanine	57383916	gc
Allantoin@16.73-gc	Allantoin	16.731	Organic acids	C4H6N4O3	158.044	HMDB00462	C02350;C01551	204;439714	chebiId:15678	Allantoin	204	gc
Alpha-muricholic acid@5.96-ba	Alpha-muricholic acid	5.961	Steroids	C24H40O5	408.288	HMDB00506	C17647	5283852;3083761	chebiId:81243	Alpha-muricholic acid	3083761	ba
Alpha-tocopherol@29.54-gc	Alpha-tocopherol	29.539	Prenols	C29H50O2	430.381	HMDB01893	C02477	14985;2116	chebiId:18145	Alpha-tocopherol	2116	gc
Anthranilic acid@13.60-gc	Anthranilic acid	13.602	Unclassified	C7H7NO2	137.048	HMDB01123	C00108	227;3734162	chebiId:30754	Anthranilic acid	227	gc
Arabinose@14.34-gc	Arabinose	14.337	Carbohydrates	C5H10O5	150.053	HMDB00646	C00216;C00259	66308;6902;439195	chebiId:17108;chebiId:46994	Arabinose	439195	gc
Arachidic acid@23.82-qpneg	Arachidic acid	23.82	Fatty Acyls	C20H40O2	312.303	HMDB02212	C06425	10467	chebiId:28822	Arachidic acid	10467	qpneg
Arachidonic acid@20.30-qpneg	Arachidonic acid	20.295	Fatty Acyls	C20H32O2	304.24	HMDB01043	C00219	444899;231	chebiId:15843	Arachidonic acid	231	qpneg
Arginine@0.98-qppos	Arginine	0.977	Amino acids	C6H14N4O2	174.112	HMDB03416;HMDB00517	C00792;C00062	71070;6322;59119146;232;5246487	chebiId:15816;chebiId:16467	Arginine	232	qppos
Asparagine@14.30-gc	Asparagine	14.298	Amino acids	C4H8N2O3	132.053	HMDB00168	C00152	236;6267;5247114	chebiId:17196	Asparagine	236	gc
Aspartic acid@12.54-gc	Aspartic acid	12.535	Amino acids	C4H7NO4	133.038	HMDB06483;HMDB00191	C00402;C00049	83887;5960;424;23443619;57397078	chebiId:17364;chebiId:17053	Aspartic acid	23443619	gc
Azelaic acid@9.84-qpneg	Azelaic acid	9.836	-	-	-	-	-	-	-	-	-	qpneg
Behenic acid@25.11-qpneg	Behenic acid	25.107	Fatty Acyls	C22H44O2	340.334	HMDB00944	C08281	8215	chebiId:23858;chebiId:28941	Behenic acid	8215	qpneg
Benzoic acid@8.93-gc	Benzoic acid	8.934	Unclassified	C7H6O2	122.037	HMDB01870	C00180	243;20144841	chebiId:30746	Benzoic acid	20144841	gc
Beta-alanine@11.33-gc	Beta-alanine	11.33	Amino acids	C3H7NO2	89.048	HMDB00056	C00099	239;4755801	chebiId:16958	Beta-alanine	239	gc
Beta-muricholic acid@6.26-ba	Beta-muricholic acid	6.261	Steroids	C24H40O5	408.288	HMDB00415	C17726	5283853;3083762	chebiId:81298	Beta-muricholic acid	3083762	ba
Butanoic acid@5.27-sf	Butanoic acid	5.267	Fatty Acyls	C4H8O2	88.052	HMDB00039	C00246	264	chebiId:30772	Butanoic acid	264	sf
Cadaverine@4.61-pa	Cadaverine	4.613	Unclassified	C5H14N2	102.116	HMDB02322	C01672	273	chebiId:18127	Cadaverine	273	pa
Caprylic acid@13.50-qpneg	Caprylic acid	13.502	Fatty Acyls	C8H16O2	144.115	HMDB00482	C06423	379	chebiId:28837	Caprylic acid	379	qpneg
Carnitine@1.02-qppos	Carnitine	1.016	Organic acids	C7H15NO3	161.105	HMDB00062	C00318;C00487;C15025	10917;288;85;2724480	chebiId:16347;chebiId:3424;chebiId:11060	Carnitine	288	qppos
Carnitine C10:0@12.39-qppos	Carnitine C10:0	12.387	Fatty Acyls	C17H33NO4	315.241	HMDB00651	-	10245190	-	Carnitine C10:0	10245190	qppos
Carnitine C10:1@11.60-qppos	Carnitine C10:1	11.603	Fatty Acyls	C17H31NO4	313.225	HMDB13205	-	53481651	-	Carnitine C10:1	53481651	qppos
Carnitine C12:0@13.80-qppos	Carnitine C12:0	13.799	Fatty Acyls	C19H37NO4	343.272	HMDB02250	-	168381	-	Carnitine C12:0	168381	qppos
Carnitine C12:1@10.69-qppos	Carnitine C12:1	10.685	Fatty Acyls	C19H35NO4	341.257	HMDB13326	-	53481671	-	Carnitine C12:1	53481671	qppos
Carnitine C14:0@15.86-qppos	Carnitine C14:0	15.857	Fatty Acyls	C21H41NO4	371.304	HMDB05066	-	53477791	-	Carnitine C14:0	53477791	qppos
Carnitine C14:1@14.94-qppos	Carnitine C14:1	14.945	Fatty Acyls	C21H39NO4	369.288	HMDB13329;HMDB02014	-	22833575;53481677	-	Carnitine C14:1	22833575	qppos
Carnitine C14:1(OH)@13.51-qppos	Carnitine C14:1(OH)	13.506	Organic acids	C21H39NO5	385.283	HMDB13330	-	53481679	-	Carnitine C14:1(OH)	53481679	qppos
Carnitine C14:2@14.08-qppos	Carnitine C14:2	14.077	Fatty Acyls	C21H37NO4	367.272	HMDB13331	-	53481681	-	Carnitine C14:2	53481681	qppos
Carnitine C16:0@17.59-qppos	Carnitine C16:0	17.588	Fatty Acyls	C23H45NO4	399.335	HMDB00222	C02990	461;11953816	chebiId:17490	Carnitine C16:0	461	qppos
Carnitine C16:1@16.41-qppos	Carnitine C16:1	16.414	Fatty Acyls	C23H43NO4	397.319	HMDB13207;HMDB06317	-	53477817;53481653	-	Carnitine C16:1	53477817	qppos
Carnitine C18:0@19.49-qppos	Carnitine C18:0	19.493	Fatty Acyls	C25H49NO4	427.366	HMDB00848	-	6426855	-	Carnitine C18:0	6426855	qppos
Carnitine C18:1@18.07-qppos	Carnitine C18:1	18.067	Fatty Acyls	C25H47NO4	425.351	HMDB05065	-	53477789	-	Carnitine C18:1	53477789	qppos
Carnitine C18:2@17.04-qppos	Carnitine C18:2	17.037	Fatty Acyls	C25H45NO4	423.335	HMDB06469;HMDB06461	-	6450015;53477834	-	Carnitine C18:2	53477834	qppos
Carnitine C3:0@1.59-qppos	Carnitine C3:0	1.588	Fatty Acyls	C10H19NO4	217.131	HMDB00824	C03017	107738	chebiId:28867	Carnitine C3:0	107738	qppos
Carnitine C4:0@2.66-qppos	Carnitine C4:0	2.659	Fatty Acyls	C11H21NO4	231.147	HMDB00736	-	10177002;439829	-	Carnitine C4:0	10177002	qppos
Carnitine C4:0(OH)@1.42-qppos	Carnitine C4:0(OH)	1.418	Fatty Acyls	C11H21NO5	247.142	HMDB13127	-	53481617	-	Carnitine C4:0(OH)	53481617	qppos
Carnitine C5:0@5.35-qppos	Carnitine C5:0	5.346	Fatty Acyls	C12H23NO4	245.163	HMDB00688	-	6426851	-	Carnitine C5:0	6426851	qppos
Carnitine C6:0@7.59-qppos	Carnitine C6:0	7.589	Fatty Acyls	C13H25NO4	259.178	HMDB00705	-	6426853;3246938	-	Carnitine C6:0	6426853	qppos
Carnitine C8:1@9.28-qppos	Carnitine C8:1	9.279	Fatty Acyls	C15H27NO4	285.194	HMDB13324	-	53481667	-	Carnitine C8:1	53481667	qppos
Carnosine@1.00-qppos	Carnosine	0.998	Peptides	C9H14N4O3	226.107	HMDB00033	C00386	439224;9369;5249653	chebiId:15727	Carnosine	5249653	qppos
Chenodeoxycholic acid@10.28-ba	Chenodeoxycholic acid	10.278	Steroids	C24H40O4	392.293	HMDB00518	C02528	10133	chebiId:16755	Chenodeoxycholic acid	10133	ba
Cholesterol@29.66-gc	Cholesterol	29.655	Steroids	C27H46O	386.355	HMDB00067	C00187	6432564;5997	chebiId:16113	Cholesterol	5997	gc
Cholic acid@9.14-ba	Cholic acid	9.145	Steroids	C24H40O5	408.288	HMDB00619	C00695;C01558	221493;303;439520	chebiId:16359;chebiId:22868;chebiId:3098	Cholic acid	303	ba
Choline phosphate@1.01-qppos	Choline phosphate	1.014	Unclassified	C5H14NO4P	183.066	HMDB01565	C00588	135437;1014	chebiId:18132	Choline phosphate	135437	qppos
Citric acid;Isocitric acid@15.97-gc	Citric acid;Isocitric acid	15.97	Organic acids	C6H8O7	192.027	HMDB00094;HMDB00193	C00158;C00311	311;19782904;88113319;1198	chebiId:30769;chebiId:30887	Citric acid;Isocitric acid	19782904;1198	gc
Citrulline@15.94-gc	Citrulline	15.939	Amino acids	C6H13N3O3	175.096	HMDB00904	C00327	833;9750;25244873	chebiId:16349	Citrulline	25244873	gc
Creatine@12.97-gc	Creatine	12.972	Amino acids	C4H9N3O2	131.069	HMDB00064	C00300	586	chebiId:16919	Creatine	586	gc
Creatinine@1.01-qppos	Creatinine	1.015	Amino acids	C4H7N3O	113.059	HMDB00562	C00791	588	chebiId:16737	Creatinine	588	qppos
Deoxycholic acid@10.48-ba	Deoxycholic acid	10.48	Steroids	C24H40O4	392.293	HMDB00626	C11171;C04483	222528;2987;23668196	chebiId:9177;chebiId:28834	Deoxycholic acid	2987	ba
Dimethylarginine@1.02-qppos	Dimethylarginine	1.016	Amino acids	C8H18N4O2	202.143	HMDB01539;HMDB03334	C03626	123831	chebiId:17929	Dimethylarginine	123831	qppos
Dimethylglycine@1.00-qppos	Dimethylglycine	0.995	Amino acids	C4H9NO2	103.063	HMDB00092	C01026	673	chebiId:17724	Dimethylglycine	673	qppos
Docosadienoic acid@23.01-qpneg	Docosadienoic acid	23.01	Fatty Acyls	C22H40O2	336.303	-	C16533	5282807;5312554	chebiId:75117	Docosadienoic acid	5282807	qpneg
Docosahexaenoic acid@20.25-qpneg	Docosahexaenoic acid	20.255	Fatty Acyls	C22H32O2	328.24	HMDB02183	C06429	445580	chebiId:28125	Docosahexaenoic acid	445580	qpneg
Docosapentaenoic acid@20.68-qpneg	Docosapentaenoic acid	20.677	Fatty Acyls	C22H34O2	330.256	HMDB01976;HMDB06528	C16513	6441454;5497182;3035421	chebiId:53488	Docosapentaenoic acid	3035421	qpneg
Docosatetraenoic acid@21.39-qpneg	Docosatetraenoic acid	21.386	-	-	-	-	-	-	-	-	-	qpneg
Docosatrienoic acid@22.24-qpneg	Docosatrienoic acid	22.242	Fatty Acyls	C22H38O2	334.287	HMDB02823	C16534	5312556	chebiId:80549	Docosatrienoic acid	5312556	qpneg
Docosenoic acid@23.97-qpneg	Docosenoic acid	23.967	Fatty Acyls	C22H42O2	338.318	HMDB02068	C08316	5281116	chebiId:28792	Docosenoic acid	5281116	qpneg
Dodecanedioic acid@13.17-qpneg	Dodecanedioic acid	13.169	Fatty Acyls	C12H22O4	230.152	HMDB00623	C02678	12736	chebiId:4676	Dodecanedioic acid	12736	qpneg
Dodecenedioic acid@12.57-qpneg	Dodecenedioic acid	12.574	Fatty Acyls	C12H20O4	228.136	HMDB00933	C16308	5283028	chebiId:545687	Traumatic acid	5283028	qpneg
Dodecenoic acid@16.80-qpneg	Dodecenoic acid	16.802	Fatty Acyls	C12H22O2	198.162	HMDB00529;HMDB10729;HMDB32248	-	5312378;5282729;125207	-	Dodecenoic acid	125207	qpneg
Eicosadienoic acid@21.69-qpneg	Eicosadienoic acid	21.692	Fatty Acyls	C20H36O2	308.272	HMDB05060	C16525	6439848	chebiId:73731	Eicosadienoic acid	6439848	qpneg
Eicosapentaenoic acid@19.58-qpneg	Eicosapentaenoic acid	19.577	Fatty Acyls	C20H30O2	302.225	HMDB01999	C06428	446284	chebiId:28364	Eicosapentaenoic acid	446284	qpneg
Eicosatrienoic acid@20.87-qpneg	Eicosatrienoic acid	20.872	Fatty Acyls	C20H34O2	306.256	HMDB60039	C16522	5312529	chebiId:53460	Dihomo-linolenic acid	5312529	qpneg
Eicosenoic acid@22.65-qpneg	Eicosenoic acid	22.645	Fatty Acyls	C20H38O2	310.287	HMDB02231	C16526	5282768	chebiId:32425	Eicosenoic acid	5282768	qpneg
Erythritol@12.46-gc	Erythritol	12.456	Carbohydrates	C4H10O4	122.058	HMDB02994	C00503	222285;8998	chebiId:17113;chebiId:48299	Erythritol	8998	gc
Ferulic acid@19.51-gc	Ferulic acid	19.514	Flavonoids	C10H10O4	194.058	HMDB00537;HMDB00954	C01494	445858;709	chebiId:17620	Ferulic acid	445858	gc
Fructose@16.66-gc	Fructose	16.664	Carbohydrates	C6H12O6	180.063	HMDB00660	C00095;C02336	5984;439163;439709	chebiId:15824;chebiId:37721;chebiId:28645	Fructose	439163	gc
Fumaric acid@10.23-gc	Fumaric acid	10.235	Organic acids	C4H4O4	116.011	HMDB00134	C00122	444972	chebiId:18012	Fumaric acid	444972	gc
GABA@12.61-gc	GABA	12.614	Amino acids	C4H9NO2	103.063	HMDB00112	C00334	119;6992099	chebiId:16865	GABA	119	gc
Galactitol;Sorbitol;Mannitol@17.57-gc	Galactitol;Sorbitol;Mannitol	17.565	Carbohydrates	C6H14O6	182.079	HMDB00107;HMDB00765;HMDB00247	C01697;C00392;C00794	11850;6251;5780	chebiId:16813;chebiId:16899;chebiId:17924	Galactitol;Mannitol;Sorbitol	11850;6251;5780	gc
Galactose;Glucose;Mannose@16.98-gc	Galactose;Glucose;Mannose	16.984	Carbohydrates	C6H12O6	180.063	HMDB00143;HMDB33704;HMDB00122;HMDB03345;HMDB00516;HMDB00169	C00124;C01582;C00984;C01825;C00031;C00267;C00221;C00159	439357;6036;3037556;12003287;79025;5793;206;64689;161658;18950	chebiId:4139;chebiId:28061;chebiId:28260;chebiId:42905;chebiId:4167;chebiId:17925;chebiId:15903;chebiId:4208	Galactose;Glucose;Mannose	12003287;206;161658	gc
Gamma-glutamylleucine@3.03-qppos	Gamma-glutamylleucine	3.031	Peptides	C11H20N2O5	260.137	HMDB11171	-	151023	-	Gamma-glutamylleucine	151023	qppos
Gamma-glutamylthreonine@1.04-qppos	Gamma-glutamylthreonine	1.038	Peptides	C9H16N2O6	248.101	HMDB28829	-	6998031	-	Gamma-glutamylthreonine	6998031	qppos
Gamma-glutamyltryptophan@6.58-qppos	Gamma-glutamyltryptophan	6.575	-	-	-	-	-	-	-	-	-	qppos
Gamma-glutamyltyrosine@2.76-qppos	Gamma-glutamyltyrosine	2.756	Peptides	C14H18N2O6	310.116	HMDB11741	-	94340	-	Gamma-glutamyltyrosine	94340	qppos
Glucuronic acid;Galacturonic acid@1.02-qpneg	Glucuronic acid;Galacturonic acid	1.024	Carbohydrates	C6H10O7	194.043	HMDB02545;HMDB03402;HMDB00127	C08348;C00333;C00191	84740;152867;19770757;441476;439215;94715;444791;610	chebiId:33830;chebiId:47954;chebiId:12952;chebiId:4153;chebiId:4178;chebiId:47952	Galacturonic acid;Glucuronic acid	152867;610	qpneg
Glutamic acid@13.70-gc	Glutamic acid	13.695	Amino acids	C5H9NO4	147.053	HMDB03339;HMDB00148	C00025;C00302;C00217	611;33032;57397101;23327	chebiId:16015;chebiId:15966;chebiId:18327	Glutamic acid	57397101	gc
Glutamine@15.40-gc	Glutamine	15.405	Amino acids	C5H10N2O3	146.069	HMDB00641;HMDB03423	C00064;C00819	5961;145815;25244553;738	chebiId:18050;chebiId:17061	Glutamine	25244553	gc
Glutarylcarnitine@1.43-qppos	Glutarylcarnitine	1.432	Fatty Acyls	C12H21NO6	275.137	HMDB13130	-	53481622	-	Glutarylcarnitine	53481622	qppos
Glutathione@1.37-qppos	Glutathione	1.373	Peptides	C10H17N3O6S	307.084	HMDB00125	C00051	124886;745;60072620	chebiId:16856	Glutathione	60072620	qppos
Glyceric acid@10.12-gc	Glyceric acid	10.125	Carbohydrates	C3H6O4	106.027	HMDB00139	C00258	752;439194	chebiId:32398	Glyceric acid	752	gc
Glycerol@9.36-gc	Glycerol	9.358	Carbohydrates	C3H8O3	92.047	HMDB00131	C00116	753	chebiId:17754	Glycerol	753	gc
Glycerol-3-phosphate@15.38-gc	Glycerol-3-phosphate	15.385	Lipids	C3H9O6P	172.014	HMDB00126	C00093	754;439162	chebiId:15978	Glycerol-3-phosphate	754	gc
Glycerophosphorylcholine@1.02-qppos	Glycerophosphorylcholine	1.017	Lipids	C8H20NO6P	257.103	HMDB00086	C00670	657272;439285;11234	chebiId:16870	Glycerophosphorylcholine	11234	qppos
Glycine@9.78-gc	Glycine	9.778	Amino acids	C2H5NO2	75.032	HMDB00123	C00037	750;5257127	chebiId:15428	Glycine	5257127	gc
Glycochenodeoxycholic acid@9.27-ba	Glycochenodeoxycholic acid	9.266	Steroids	C26H43NO5	449.314	HMDB00637;HMDB06898	C05466;C05462	22833540;12544	chebiId:36274	Glycochenodeoxycholic acid	12544	ba
Glycocholic acid@5.86-ba	Glycocholic acid	5.86	Steroids	C26H43NO6	465.309	HMDB00138	C01921	10140;23617285;755	chebiId:17687	Glycocholic acid	755	ba
Glycohyodeoxycholic acid@5.55-ba	Glycohyodeoxycholic acid	5.551	-	-	-	-	-	-	-	-	-	ba
Glycoursodeoxycholic acid@5.18-ba	Glycoursodeoxycholic acid	5.178	Steroids	C26H43NO5	449.314	HMDB00708	-	12310288	-	Glycoursodeoxycholic acid	12310288	ba
Glycylglycine@1.00-qppos	Glycylglycine	0.998	Peptides	C4H8N2O3	132.053	HMDB11733	C02037	11163;1548897	chebiId:17201	Glycylglycine	11163	qppos
Guanine@20.28-gc	Guanine	20.28	Bases	C5H5N5O	151.049	HMDB00132	C00242	764	chebiId:16235	Guanine	764	gc
Heptadecatrienoic acid@18.89-qpneg	Heptadecatrienoic acid	18.889	Fatty Acyls	C17H28O2	264.209	-	C16344	16061034	chebiId:76235	Heptadecatrienoic acid	16061034	qpneg
Heptadecenoic acid@20.57-qpneg	Heptadecenoic acid	20.567	Fatty Acyls	C17H32O2	268.24	HMDB31046;HMDB60038	C16536	5312435;5312440	chebiId:80550	Heptadecenoic acid	5312435	qpneg
Hexacosanoic acid@27.45-qpneg	Hexacosanoic acid	27.455	Fatty Acyls	C26H52O2	396.397	HMDB02356	-	10469	-	Hexacosanoic acid	10469	qpneg
Hexadecadienoic acid@18.95-qpneg	Hexadecadienoic acid	18.954	Fatty Acyls	C16H28O2	252.209	HMDB00477	-	13932172	-	Hexadecadienoic acid	13932172	qpneg
Hexadecanedioic acid@16.59-qpneg	Hexadecanedioic acid	16.59	Fatty Acyls	C16H30O4	286.214	HMDB00672	C19615	10459	chebiId:73722	Hexadecanedioic acid	10459	qpneg
Hexanoylglycine*@7.06-qpneg	Hexanoylglycine*	7.061	-	-	-	-	-	-	-	-	-	qpneg
Hippuric acid@15.98-gc	Hippuric acid	15.978	Unclassified	C9H9NO3	179.058	HMDB00714	C01586	464	chebiId:18089	Hippuric acid	464	gc
Histidine@17.06-gc	Histidine	17.061	Amino acids	C6H9N3O2	155.069	HMDB00177	C00135	6274;773;3651426	-	Histidine	3651426	gc
Homoserine@1.01-qppos	Homoserine	1.01	Amino acids	C4H9NO3	119.058	HMDB00719	C00263	12647;1502076;779;25245858;193314	chebiId:15699	Homoserine	193314	qppos
Hyocholic acid@8.16-ba	Hyocholic acid	8.163	Steroids	C24H40O5	408.288	HMDB00760	C17649	92805	chebiId:81244	Hyocholate;Hyocholic acid;Iocholic acid;gamma-Muricholate;alpha-Hyocholic acid;3alpha,6alpha,7alpha-Trihydroxy-5beta-cholan-24-oic acid;6alpha-Hydroxychenodeoxycholic acid	92805	ba
Hyodeoxycholic acid@9.27-ba	Hyodeoxycholic acid	9.271	Steroids	C24H40O4	392.293	HMDB00733	-	9963687;227033	-	Hyodeoxycholic acid	227033	ba
Hypotaurine@13.47-gc	Hypotaurine	13.466	Organic acids	C2H7NO2S	109.02	HMDB00965	C00519	107812;25244088	chebiId:16668	Hypotaurine	107812	gc
Hypoxanthine@15.75-gc	Hypoxanthine	15.753	Bases	C5H4N4O	136.039	HMDB00157	C00262	790	chebiId:17368	Hypoxanthine	790	gc
Indole-3-acetamide@7.74-qpneg	Indole-3-acetamide	7.74	Indoles	C10H10N2O	174.079	HMDB29739	C02693	397	chebiId:16031	Indole-3-acetamide	397	qpneg
Indole-3-aldehyde@9.59-qpneg	Indole-3-aldehyde	9.592	-	-	-	-	-	-	-	-	-	qpneg
Indole-3-lactic acid@8.34-qpneg	Indole-3-lactic acid	8.342	Indoles	C11H11NO3	205.074	HMDB00671	C02043	92904	chebiId:17282;chebiId:24813	Indole-3-lactic acid	92904	qpneg
Inosine@25.08-gc	Inosine	25.079	Nucleosides	C10H12N4O5	268.081	HMDB00195	C00294	6021	chebiId:17596	Inosine	6021	gc
Inositol@19.93-gc	Inositol	19.926	Unclassified	C6H12O6	180.063	HMDB06088;HMDB00211	C06153;C00137;C19891	892	chebiId:10642;chebiId:17268	Inositol	892	gc
Isodeoxycholic acid@11.01-ba	Isodeoxycholic acid	11.011	Steroids	C24H40O4	392.293	HMDB00811	C15515	5283821	chebiId:52030	6-beta-hydroxylithocholic acid	5283821	ba
Isoleucine@9.60-gc	Isoleucine	9.603	Amino acids	C6H13NO2	131.095	HMDB00172	C00407	791;6306	chebiId:17191	Isoleucine	791	gc
Ketoisovaleric acid@7.47-gc	Ketoisovaleric acid	7.469	Organic acids	C5H8O3	116.047	HMDB00019	C00141	49	chebiId:11851;chebiId:16530	Ketoisovaleric acid	49	gc
Kynurenine@21.46-gc	Kynurenine	21.459	Unclassified	C10H12N2O3	208.085	HMDB00684	C00328	846;161166;25245862	chebiId:16946	Kynurenine	25245862	gc
Lactic acid@6.49-gc	Lactic acid	6.489	Organic acids	C3H6O3	90.032	HMDB01311;HMDB00190	C00256;C00186	61503;107689;19789253;612	chebiId:341;chebiId:42111;chebiId:422	Lactic acid	19789253	gc
Lauric acid@17.71-qpneg	Lauric acid	17.711	Fatty Acyls	C12H24O2	200.178	HMDB00638	C02679	3893	chebiId:30805	Lauric acid	3893	qpneg
Leucine@9.30-gc	Leucine	9.304	Amino acids	C6H13NO2	131.095	HMDB00687	C00123	6106;857;5255803	chebiId:15603	Leucine	5255803	gc
Leucylproline@1.42-qppos	Leucylproline	1.422	Peptides	C11H20N2O3	228.147	HMDB11175	-	44369311	-	Leucylproline	44369311	qppos
Linoleic acid@20.34-qpneg	Linoleic acid	20.341	Fatty Acyls	C18H32O2	280.24	HMDB00673	C01595	5280450;3931	chebiId:17351	Linoleic acid	3931	qpneg
Linolenic acid@19.57-qpneg	Linolenic acid	19.575	Fatty Acyls	C18H30O2	278.225	HMDB01388	C06427	5280934;860	chebiId:27432	Linolenic acid	5280934	qpneg
Lithocholic acid@11.11-ba	Lithocholic acid	11.112	Steroids	C24H40O3	376.298	HMDB00761	C03990	11740284;9903	chebiId:16325	Lithocholic acid	11740284	ba
Lysine@17.05-gc	Lysine	17.048	Amino acids	C6H14N2O2	146.106	HMDB03405;HMDB00182	C00739;C00047	57449;5962;866;5248709	chebiId:16855;chebiId:18019	Lysine	5248709	gc
Malic acid@12.14-gc	Malic acid	12.145	Organic acids	C4H6O5	134.022	HMDB00156;HMDB00744	C00149;C00711	525;20130941;222656	chebiId:30797;chebiId:6650	Malic acid	20130941	gc
Malonylcarnitine@1.41-qppos	Malonylcarnitine	1.412	Fatty Acyls	C10H17NO6	247.106	HMDB02095	-	22833583	-	Malonylcarnitine	22833583	qppos
Maltose;Trehalose@27.71-gc	Maltose;Trehalose	27.71	Carbohydrates	C12H22O11	342.116	HMDB00163;HMDB00975	C00208;C01083	439341;6255;439186;294;7427;1143	chebiId:17306;chebiId:16551	Maltose;Trehalose	294;1143	gc
Margaric acid@21.69-qpneg	Margaric acid	21.693	Fatty Acyls	C17H34O2	270.256	HMDB02259	-	10465	-	Margaric acid	10465	qpneg
Methionine@12.49-gc	Methionine	12.487	Amino acids	C5H11NO2S	149.051	HMDB00696	C00073	6137;876;5255805	chebiId:16643	Methionine	5255805	gc
Methylmalonic acid@1.54-qpneg	Methylmalonic acid	1.542	Organic acids	C4H6O4	118.027	HMDB00202	C02170	487	chebiId:30860	Methylmalonic acid	487	qpneg
Murideoxycholic acid@7.23-ba	Murideoxycholic acid	7.232	Steroids	C24H40O4	392.293	HMDB00811	C15515	5283821	CHEBI:52030	Murocholic acid	5283821	ba
Myristic acid@19.38-qpneg	Myristic acid	19.384	Fatty Acyls	C14H28O2	228.209	HMDB00806	C06424	11005	chebiId:28875;chebiId:30807	Myristic acid	11005	qpneg
Myristoleic acid@18.31-qpneg	Myristoleic acid	18.306	Fatty Acyls	C14H26O2	226.193	HMDB02000	C08322	5281119	chebiId:27781	Myristoleic acid	5281119	qpneg
N-acetylglutamine@1.44-qppos	N-acetylglutamine	1.438	Amino acids	C7H12N2O4	188.08	HMDB06029	-	182230	chebiId:17008	N-acetylglutamine	182230	qppos
N-acetylputrescine@3.33-pa	N-acetylputrescine	3.333	Organic acids	C6H14N2O	130.111	HMDB02064	C02714	122356	chebiId:17768	N-acetylputrescine	122356	pa
N1-acetylspermidine@5.22-pa	N1-acetylspermidine	5.22	Amino acids	C9H21N3O	187.168	HMDB01276	C00612	496	chebiId:17927	N-acetylspermine	496	pa
N1-acetylspermine@6.84-pa	N1-acetylspermine	6.836	Amino acids	C12H28N4O	244.226	HMDB01186	C02567	916	chebiId:17312	N-acetylspermine	916	pa
N1,N12-diacetylspermine@5.80-pa	N1,N12-diacetylspermine	5.8	Amino acids	C14H30N4O2	286.237	HMDB02172;HMDB41876	C03413	132679;132680	chebiId:28101	N1,N12-diacetylspermine	132680	pa
N1,N8-diacetylspermidine@4.39-pa	N1,N8-diacetylspermidine	4.387	Amino acids	C11H23N3O2	229.179	HMDB41947	-	389613	-	N1,N8-diacetylspermidine	389613	pa
N6-acetyllysine;N2-acetyllysine@1.13-qppos	N6-acetyllysine;N2-acetyllysine	1.131	Amino acids	C8H16N2O3	188.116	HMDB00446;HMDB00206	C12989;C02727	92907;265949;92832	chebiId:35704;chebiId:17752	N2-acetyllysine;N6-acetyllysine	92907;265949	qppos
N8-acetylspermidine@5.41-pa	N8-acetylspermidine	5.411	Amino acids	C9H21N3O	187.168	HMDB02189	C01029	123689	chebiId:27911	N-acetylspermidine	123689	pa
NAAG@1.88-qppos	NAAG	1.883	Peptides	C11H16N2O8	304.091	HMDB01067	C12270	5255;188803	chebiId:73688	NAAG	5255	qppos
Niacinamide@2.39-qppos	Niacinamide	2.39	Unclassified	C6H6N2O	122.048	HMDB01406	C00153	936	chebiId:17154	Niacinamide	936	qppos
Nicotinic acid@9.56-gc	Nicotinic acid	9.56	Unclassified	C6H5NO2	123.032	HMDB01488	C00253	938;117629482	chebiId:15940	Nicotinic acid	117629482	gc
Nonadecanoic acid@23.14-qpneg	Nonadecanoic acid	23.138	Fatty Acyls	C19H38O2	298.287	HMDB00772	C16535	12591	chebiId:39246	Nonadecanoic acid	12591	qpneg
Nonadecenoic acid@21.98-qpneg	Nonadecenoic acid	21.978	Fatty Acyls	C19H36O2	296.272	HMDB13622	-	5312513	chebiId:37527	Nonadecenoic acid	5312513	qpneg
O-phosphoethanolamine@15.57-gc	O-phosphoethanolamine	15.569	Organic acids	C2H8NO4P	141.019	HMDB00224	C00346	1015;5232324	chebiId:17553	O-phosphoethanolamine	1015	gc
Oleic acid;Elaidic acid;Vaccenic acid@21.28-qpneg	Oleic acid;Elaidic acid;Vaccenic acid	21.278	Fatty Acyls	C18H34O2	282.256	HMDB00573;HMDB00207;HMDB03231	C01712;C00712;C08367	637517;445639;5282761;5281127	chebiId:27997;chebiId:16196;chebiId:28727	Oleic acid;Elaidic acid;Vaccenic acid	637517;445639;5281127	qpneg
Omega-muricholic acid@5.85-ba	Omega-muricholic acid	5.851	Steroids	C24H40O5	408.288	HMDB00364	C17727	5283851	chebiId:81299	omega-muricholic acid	5283851	ba
Ornithine@2.12-pa	Ornithine	2.12	Amino acids	C5H12N2O2	132.09	HMDB03374;HMDB00214	C00077;C00515	6262;389;71082	chebiId:15729;chebiId:16176	Ornithine	389	pa
Palmitic acid@20.94-qpneg	Palmitic acid	20.941	Fatty Acyls	C16H32O2	256.24	HMDB00220	C00249	985	chebiId:15756	Palmitic acid	985	qpneg
Palmitoleic acid@19.82-qpneg	Palmitoleic acid	19.819	Fatty Acyls	C16H30O2	254.225	HMDB03229	C08362	445638;4668	chebiId:28716	Palmitoleic acid	445638	qpneg
Pantothenic acid@18.06-gc	Pantothenic acid	18.057	Amino acids	C9H17NO5	219.111	HMDB00210	C00864	6613;988	chebiId:29032;chebiId:46905;chebiId:7916	Pantothenic acid	988	gc
PCae(12:0)@15.39-qppos	PCae(12:0)	15.388	-	-	-	-	-	-	-	-	-	qppos
PCae(14:0)@15.59-qppos	PCae(14:0)	15.585	Lipids	C22H46NO7P	467.301	HMDB10379	-	460604;24779490	-	PCae(14:0)	24779490	qppos
PCae(15:0)@16.39-qppos	PCae(15:0)	16.39	Lipids	C23H48NO7P	481.317	HMDB10381	-	24779458	-	PCae(15:0)	24779458	qppos
PCae(16:0)@17.22-qppos	PCae(16:0)	17.218	Lipids	C24H50NO7P	495.332	HMDB10382	-	460602;9827122;15061532;10097314;86554	-	PCae(16:0)	86554	qppos
PCae(16:1)@16.12-qppos	PCae(16:1)	16.119	Lipids	C24H48NO7P	493.317	HMDB10383	-	24779461;24779462;24779460	-	PCae(16:1)	24779462	qppos
PCae(17:0)@18.10-qppos	PCae(17:0)	18.101	Lipids	C25H52NO7P	509.348	HMDB12108	-	24779463;24779464	-	PCae(17:0)	24779464	qppos
PCae(18:0)@19.03-qppos	PCae(18:0)	19.026	Lipids	C26H54NO7P	523.364	HMDB11128;HMDB10384	-	497299;24779491;18684067;86556;10436817;10208382	-	PCae(18:0)	10208382	qppos
PCae(18:1)@17.70-qppos	PCae(18:1)	17.696	Lipids	C26H52NO7P	521.348	HMDB10385;HMDB02815	-	16081932;53480465;24779493;6449974;24779492;10279683;24779465;24779466;6030826;15120177;24779494	-	PCae(18:1)	10279683	qppos
PCae(18:2)@16.74-qppos	PCae(18:2)	16.741	Lipids	C26H50NO7P	519.332	HMDB10386	-	11005824;24779467;11988421	-	PCae(18:2)	11988421	qppos
PCae(18:3)@16.01-qppos	PCae(18:3)	16.008	Lipids	C26H48NO7P	517.317	HMDB10387;HMDB10388	-	52924045;24779469	-	PCae(18:3)	24779469	qppos
PCae(20:1)@19.44-qppos	PCae(20:1)	19.444	Lipids	C28H56NO7P	549.379	HMDB10391	-	52924051	-	PCae(20:1)	52924051	qppos
PCae(20:2)@18.32-qppos	PCae(20:2)	18.316	Lipids	C28H54NO7P	547.364	HMDB10392	-	52924053	-	PCae(20:2)	52924053	qppos
PCae(20:3)@19.02-qppos	PCae(20:3)	19.018	Lipids	C28H52NO7P	545.348	HMDB10394;HMDB10393	-	53480467;52924055	-	PCae(20:3)	52924055	qppos
PCae(20:4)@17.70-qppos	PCae(20:4)	17.7	Lipids	C28H50NO7P	543.332	HMDB10395;HMDB10396	-	24779476;53480469;16035471	-	PCae(20:4)	16035471	qppos
PCae(20:5)@16.76-qppos	PCae(20:5)	16.757	Lipids	C28H48NO7P	541.317	HMDB10397	-	11757087	-	PCae(20:5)	11757087	qppos
PCae(22:4)@18.06-qppos	PCae(22:4)	18.056	Lipids	C30H54NO7P	571.364	HMDB10401	-	52924039	-	PCae(22:4)	52924039	qppos
PCae(22:6)@16.84-qppos	PCae(22:6)	16.836	Lipids	C30H50NO7P	567.332	HMDB10404	-	10415542	-	PCae(22:6)	10415542	qppos
PCee(16:0)@18.13-qppos	PCee(16:0)	18.126	Lipids	C24H52NO6P	481.353	-	-	-	-	PCee(16:0)	-	qppos
Pentadecanoic acid@19.95-qpneg	Pentadecanoic acid	19.951	Fatty Acyls	C15H30O2	242.225	HMDB00826	C16537	13849	chebiId:42504	Pentadecanoic acid	13849	qpneg
Pentadecenoic acid@19.29-qpneg	Pentadecenoic acid	19.295	Fatty Acyls	C15H28O2	240.209	HMDB29765	-	6365140	-	Pentadecenoic acid	6365140	qpneg
Phenylalanine@13.78-gc	Phenylalanine	13.776	Amino acids	C9H11NO2	165.079	HMDB00159	C00079	6140;994;57397115	chebiId:17295	Phenylalanine	57397115	gc
Phosphoric acid@9.37-gc	Phosphoric acid	9.37	Unclassified	H3O4P	97.977	HMDB01429;HMDB02142	C00009	1004	chebiId:18367;chebiId:26078	Phosphoric acid	1004	gc
Phosphoserine@0.98-qppos	Phosphoserine	0.977	Amino acids	C3H8NO6P	185.009	HMDB00272;HMDB01721	C01005	68841;106	chebiId:15811	Phosphoserine	106	qppos
Proline@9.64-gc	Proline	9.641	Amino acids	C5H9NO2	115.063	HMDB03411;HMDB00162	C00763;C00148	8988;145742;25246272;614	chebiId:16313;chebiId:17203	Proline	25246272	gc
Proline betaine@1.27-qppos	Proline betaine	1.268	Amino acids	C7H13NO2	143.095	HMDB04827	C10172	115244	chebiId:35280	Proline betaine	115244	qppos
Propionic acid@2.87-sf	Propionic acid	2.871	Organic acids	C3H6O2	74.037	HMDB00237	C00163	1032	chebiId:30768	Propionic acid	1032	sf
Putrescine@4.53-pa	Putrescine	4.533	Unclassified	C4H12N2	88.1	HMDB01414	C00134	1045	chebiId:17148	Putrescine	1045	pa
Pyruvic acid;Oxaloacetic acid@6.36-gc	Pyruvic acid;Oxaloacetic acid	6.362	Organic acids	C4H4O5;C3H4O3	110.011	HMDB00223;HMDB00243	C00036;C00022	970;1060	chebiId:30744;chebiId:32816	Oxaloacetic acid;Pyruvic acid	970;1060	gc
Raffinose@31.36-gc	Raffinose	31.365	Carbohydrates	C18H32O16	504.169	HMDB03213	C00492	10542;219993;439242	chebiId:16634	Raffinose	219993	gc
Ribitol@15.03-gc	Ribitol	15.032	Carbohydrates	C5H12O5	152.068	HMDB00508	C00474	827	chebiId:15963	Ribitol	827	gc
Ribose-5-phosphate@20.38-gc	Ribose-5-phosphate	20.382	Carbohydrates	C5H11O8P	230.019	HMDB01548	C00117	439167	chebiId:17797;chebiId:52742	Ribose-5-phosphate	439167	gc
Ribose;Ribulose@14.50-gc	Ribose;Ribulose	14.503	Carbohydrates	C5H10O5	150.053	HMDB00283;HMDB00621;HMDB03371	C00121;C00309;C00508	5779;993;79021;439204;439203	chebiId:47013;chebiId:17173;chebiId:16880	Ribose;Ribulose	993;79021	gc
Ribulose-5-phosphate@20.61-gc	Ribulose-5-phosphate	20.609	Carbohydrates	C5H11O8P	230.019	HMDB00618	C00199;C01101	439184;439399	chebiId:17363;chebiId:17666	Ribulose-5-phosphate	439184	gc
S-adenosylmethionine@4.07-pa	S-adenosylmethionine	4.07	Nucleosides	C15H22N6O5S	398.137	HMDB01185	C00019	34756;34755;5136	chebiId:15414;chebiId:67040	S-adenosylmethionine	5136	pa
Sebacic acid@16.83-gc	Sebacic acid	16.832	Fatty Acyls	C10H18O4	202.121	HMDB00792	C08277	5192	chebiId:41865	Sebacic acid	5192	gc
Serine@10.51-gc	Serine	10.509	Amino acids	C3H7NO3	105.043	HMDB00187;HMDB03406	C00065;C00740	5951;617;6857552;71077	chebiId:17115	Serine	617	gc
Shikimic acid@15.39-gc	Shikimic acid	15.394	Unclassified	C7H10O5	174.053	HMDB03070	C00493	8742;1094	chebiId:16119	Shikimic acid	1094	gc
Spermidine@6.61-pa	Spermidine	6.612	Unclassified	C7H19N3	145.158	HMDB01257	C00315	1102	chebiId:16610	Spermidine	1102	pa
Stearic acid@22.43-qpneg	Stearic acid	22.431	Fatty Acyls	C18H36O2	284.272	HMDB00827	C01530	5281	chebiId:25629;chebiId:28842	Stearic acid	5281	qpneg
Stearidonic acid@18.89-qpneg	Stearidonic acid	18.89	Fatty Acyls	C18H28O2	276.209	HMDB06547	C16300	5312508	chebiId:32389	Stearidonic acid	5312508	qpneg
Succinic acid@9.82-gc	Succinic acid	9.825	Organic acids	C4H6O4	118.027	HMDB00254	C00042	1110;21952380	chebiId:15741	Succinic acid	1110	gc
Succinyladenosine@5.70-qppos	Succinyladenosine	5.7	Nucleosides	C14H17N5O8	383.108	HMDB00912	-	20849086	-	Succinyladenosine	20849086	qppos
Sucrose@27.03-gc	Sucrose	27.028	Carbohydrates	C12H22O11	342.116	HMDB00258	C00089	5988;1115	chebiId:17992	Sucrose	1115	gc
Tauro-alpha-muricholic acid;Tauro-beta-muricholic acid;Tauro-omega-muricholic acid@2.32-ba	Tauro-alpha-muricholic acid;Tauro-beta-muricholic acid;Tauro-omega-muricholic acid	2.32	Steroids	C26H45NO7S	515.292	HMDB00932	-	101657566;168408	chebiId:133057	TAURO Î±-MURICHOLIC ACID SODIUM SALT;Tauro-beta-muricholic acid	101657566;168408	ba
Taurochenodeoxycholic acid@6.92-ba	Taurochenodeoxycholic acid	6.92	Steroids	C26H45NO6S	499.297	HMDB00951	C05465	387316	chebiId:16525;chebiId:9407	Taurochenodeoxycholic acid	387316	ba
Taurocholic acid@4.46-ba	Taurocholic acid	4.459	Steroids	C26H45NO7S	515.292	HMDB00036	C05122	440567;5247;46783527	chebiId:28865	Taurocholic acid	5247	ba
Taurodeoxycholic acid@8.05-ba	Taurodeoxycholic acid	8.046	Steroids	C26H45NO6S	499.297	HMDB00896	C05463	2733768;440687;92042745	chebiId:36261;chebiId:9410	Taurodeoxycholic acid	2733768	ba
Taurohyodeoxycholic acid@4.18-ba	Taurohyodeoxycholic acid	4.18	Steroids	C26H45NO6S	499.297	-	-	119046	-	Taurohyodeoxycholic acid	119046	ba
Taurolithocholic acid@9.73-ba	Taurolithocholic acid	9.727	Steroids	C26H45NO5S	483.302	HMDB00722	C02592	439763;53477716	chebiId:36259	Taurolithocholic acid	439763	ba
Tauroursodeoxycholic acid@4.02-ba	Tauroursodeoxycholic acid	4.017	Steroids	C26H45NO6S	499.297	HMDB00874	-	12443252	-	Tauroursodeoxycholic acid	12443252	ba
Tetracosenoic acid@25.17-qpneg	Tetracosenoic acid	25.174	Fatty Acyls	C24H46O2	366.35	HMDB02368	C08323	5281120	chebiId:44247	Tetracosenoic acid	5281120	qpneg
Tetradecadienoic acid@17.59-qpneg	Tetradecadienoic acid	17.585	Fatty Acyls	C14H24O2	224.178	HMDB00560	-	5312409	-	Tetradecadienoic acid	5312409	qpneg
Tetradecanedioic acid@14.99-qpneg	Tetradecanedioic acid	14.987	Fatty Acyls	C14H26O4	258.183	HMDB00872	-	13185	-	Tetradecanedioic acid	13185	qpneg
Threonic acid@12.95-gc	Threonic acid	12.952	Carbohydrates	C4H8O5	136.037	HMDB00943	C01620	151152;439535;5460407	chebiId:15908;chebiId:49060	Threonic acid	439535	gc
Threonine@10.87-gc	Threonine	10.872	Amino acids	C4H9NO3	119.058	HMDB00167	C00188	6288;205;15341575	chebiId:16857	Threonine	15341575	gc
Thymine@11.02-gc	Thymine	11.024	Bases	C5H6N2O2	126.043	HMDB00262	C00178	1135	chebiId:17821	Thymine	1135	gc
Trimethyl-lysine@0.98-qppos	Trimethyl-lysine	0.975	Amino acids	C9H20N2O2	188.152	HMDB01325	C03793	440120	chebiId:17311	Trimethyl-lysine	440120	qppos
Tryptophan@21.89-gc	Tryptophan	21.895	Indoles	C11H12N2O2	204.09	HMDB00929;HMDB30396	C00078;C00806	6305;1148;9060;4099458	chebiId:16828;chebiId:27897	Tryptophan	1148	gc
Tyrosine@17.28-gc	Tyrosine	17.278	Amino acids	C9H11NO3	181.074	HMDB00158	C00082	6057;1153;4300518	chebiId:17895	Tyrosine	1153	gc
UMP@1.38-qpneg	UMP	1.382	Nucleotides	C9H13N2O9P	324.036	HMDB00288	C00105	6030;1172	chebiId:16695	UMP	1172	qpneg
Undecanoic acid@16.81-qpneg	Undecanoic acid	16.807	-	-	-	-	-	-	-	-	-	qpneg
Uracil@10.20-gc	Uracil	10.197	Bases	C4H4N2O2	112.027	HMDB00300	C00106	1174	chebiId:17568	Uracil	1174	gc
Urea@8.84-gc	Urea	8.84	Organic acids	CH4N2O	60.032	HMDB00294	C00086	1176	chebiId:16199	Urea	1176	gc
Uric acid@20.03-gc	Uric acid	20.026	Bases	C5H4N4O3	168.028	HMDB00289	C00366	1175	chebiId:17775	Uric acid	1175	gc
Uridine@1.70-qpneg	Uridine	1.7	Nucleosides	C9H12N2O6	244.07	HMDB00296	C00299	6029;1177	chebiId:16704	Uridine	1177	qpneg
Ursodeoxycholic acid@8.88-ba	Ursodeoxycholic acid	8.885	Steroids	C24H40O4	392.293	HMDB00946	C07880	31401	chebiId:9907	Ursodeoxycholic acid	31401	ba
Valine@8.55-gc	Valine	8.55	Amino acids	C5H11NO2	117.079	HMDB00883	C00183	6287;1182;5237032	chebiId:16414	Valine	1182	gc
Xanthine@18.51-gc	Xanthine	18.513	Bases	C5H4N4O2	152.033	HMDB00292	C00385	1188	chebiId:17712;chebiId:48517	Xanthine	1188	gc
Xylitol@14.81-gc	Xylitol	14.808	Carbohydrates	C5H12O5	152.068	HMDB02917	C00379	6912	chebiId:17151	Xylitol	6912	gc
Xylose@14.27-gc	Xylose	14.27	Carbohydrates	C5H10O5	150.053	HMDB00098	C00181	135191;6027	chebiId:15936;chebiId:53455	Xylose	135191	gc

## Sheet: Area
Sid	2-aminoadipic acid@15.18-gc	2-hydroxy-3-methylbutyric acid@4.58-sf	2-hydroxybutyric acid@2.49-sf	2-hydroxyglutaric acid@13.17-gc	2-oxoglutaric acid@13.19-gc	3-hydroxybutyric acid@1.66-sf	3-indoxyl sulfuric acid@4.81-qpneg	3-methylhistidine@0.99-qppos	4-hydroxymandelic acid@15.38-gc	4-hydroxyproline@12.60-gc	5-aminovaleric acid@13.70-gc	5-oxoproline@12.53-gc	7,12-dihydroxy-3-oxocholanoic acid@7.12-ba	Acetic acid@1.78-sf	Acetylcarnitine@1.23-qppos	Acetylcholine@1.07-qppos	Adenine@16.39-gc	Alanine@7.03-gc	Allantoin@16.73-gc	Alpha-muricholic acid@5.96-ba	Alpha-tocopherol@29.54-gc	Anthranilic acid@13.60-gc	Arabinose@14.34-gc	Arachidic acid@23.82-qpneg	Arachidonic acid@20.30-qpneg	Arginine@0.98-qppos	Asparagine@14.30-gc	Aspartic acid@12.54-gc	Azelaic acid@9.84-qpneg	Behenic acid@25.11-qpneg	Benzoic acid@8.93-gc	Beta-alanine@11.33-gc	Beta-muricholic acid@6.26-ba	Butanoic acid@5.27-sf	Cadaverine@4.61-pa	Caprylic acid@13.50-qpneg	Carnitine@1.02-qppos	Carnitine C10:0@12.39-qppos	Carnitine C10:1@11.60-qppos	Carnitine C12:0@13.80-qppos	Carnitine C12:1@10.69-qppos	Carnitine C14:0@15.86-qppos	Carnitine C14:1@14.94-qppos	Carnitine C14:1(OH)@13.51-qppos	Carnitine C14:2@14.08-qppos	Carnitine C16:0@17.59-qppos	Carnitine C16:1@16.41-qppos	Carnitine C18:0@19.49-qppos	Carnitine C18:1@18.07-qppos
BlM_pre	1735	58	77	198937	764	350	NA	66316.426	33292	1187043	6224	11930932	272	19283	22659.712	79687.225	182192	911164	1375	2347	70	21278	36534	736715.721	799802.19	1125628.116	6614	487720	1760908.162	66770.653	7498928	110272980	3314	4556	63976	NA	162396.321	2724.948	NA	NA	4003632.455	132277.703	NA	NA	NA	NA	NA	NA	NA
BlM_post	3590	64	98	56654	6545	459	NA	49403.272	3370	1293738	20130	13019163	478	19473	14969.848	NA	72808	25819782	1248	6367	790	10494	161857	588837.069	1211380.873	902444.694	4944	373805	10638835.203	44904.248	7492745	108820315	20454	2152	72145	2766163.505	88910.535	NA	NA	NA	3195018.44	67164.507	NA	NA	NA	NA	NA	NA	NA
QC_ileon_5a	NA	5848	3998	NA	NA	6615	20465545.82	5051404.049	NA	NA	NA	NA	NA	220649	27706847.923	8325443.512	NA	NA	NA	NA	NA	NA	NA	1971843.59	126886181.458	382260058.439	NA	NA	39598411.42	1353670.435	NA	NA	NA	134448	12641054	3736186.286	31113916.644	126970.863	16592.495	3646967.821	2654892.02	2861881.402	4543493.521	8960673.679	1148453.811	4709573.711	3258851.83	954968.394	3654296.774
QC_ileon_6a	370704	NA	NA	1007267	406021	NA	NA	NA	466382	11891636	1918225	126620123	160559	NA	NA	NA	3641794	613825084	6297132	5845767	23478	77513	313573474	NA	NA	NA	6860780	82706399	NA	NA	45691904	122812938	32997181	NA	NA	NA	NA	NA	NA	NA	NA	NA	NA	NA	NA	NA	NA	NA	NA
QC_ileon_5b	NA	5915	4015	NA	NA	6418	23622396.265	4974989.716	NA	NA	NA	NA	NA	225453	29968250.551	8727950.557	NA	NA	NA	NA	NA	NA	NA	2279410.857	120712040.19	430291294.478	NA	NA	39074720.851	1182833.225	NA	NA	NA	135142	12520603	3354737.333	34988068.529	129811.738	14278.76	4026437.783	2864049.373	3123101.155	4758266.128	9444053.282	1364943.725	5051781.38	3378849.162	1044205.779	3855670.25
QC_ileon_6b	506317	NA	NA	881650	330421	NA	NA	NA	458284	10195241	2245006	126399048	145277	NA	NA	NA	3243783	467056080	5159911	6590167	21187	81979	323686184	NA	NA	NA	4195033	66699809	NA	NA	41302764	110100696	32056421	NA	NA	NA	NA	NA	NA	NA	NA	NA	NA	NA	NA	NA	NA	NA	NA
QC_ileon_5c	NA	5581	3925	NA	NA	6314	22128541.488	4275922.346	NA	NA	NA	NA	NA	225432	24417572.596	7301052.793	NA	NA	NA	NA	NA	NA	NA	1947812.974	141583213.348	333583847.87	NA	NA	38466051.925	960247.726	NA	NA	NA	128364	12732002	3922714.104	27899981.736	145043.14	22410.2	3336157.886	2517783.985	2614446.602	4184814.423	8439880.871	1145053.912	4668342.154	2977776.905	782435.912	3328324.429
QC_ileon_6c	363399	NA	NA	888774	220153	NA	NA	NA	465041	8880266	2409210	122550691	150375	NA	NA	NA	2964314	430246285	3921786	5843751	20032	96414	316081469	NA	NA	NA	4566246	64745595	NA	NA	41711268	102510307	33897139	NA	NA	NA	NA	NA	NA	NA	NA	NA	NA	NA	NA	NA	NA	NA	NA
QC_ileon_5d	NA	5639	4091	NA	NA	6599	23155863.973	4161030.808	NA	NA	NA	NA	NA	223654	26813300.411	8543448.271	NA	NA	NA	NA	NA	NA	NA	2513968.54	156517577.361	370590095.304	NA	NA	38991655.786	1472739.792	NA	NA	NA	136002	12848411	3550054.656	31063776.311	147327.46	26693.142	3668000.969	2778675.423	2876528.665	4337236.643	8785662.441	1297007.56	5058186.28	3239953.669	945877.124	3655979.773
QC_ileon_6d	396859	NA	NA	992596	253316	NA	NA	NA	539012	10611152	2430055	141603043	163056	NA	NA	NA	3518697	626023320	5498575	6329160	22700	112786	335061939	NA	NA	NA	6310152	70824495	NA	NA	46363216	122342791	34041297	NA	NA	NA	NA	NA	NA	NA	NA	NA	NA	NA	NA	NA	NA	NA	NA
QC_ileon_5e	NA	5962	3861	NA	NA	6532	22535886.927	4855491.684	NA	NA	NA	NA	NA	229926	28020927.995	9179181.594	NA	NA	NA	NA	NA	NA	NA	2390883.681	132847310.849	390186475.795	NA	NA	38094012.748	1113839.141	NA	NA	NA	135607	13000979	3986784.036	33652416.868	156416.363	19555.377	3736794.042	3044855.528	2832843.523	4192954.416	9673665.851	1268255.093	5139838.927	3070272.66	860940.158	3823119.402
QC_ileon_6e	530914	NA	NA	1027561	432164	NA	NA	NA	553535	11034132	2598433	168805524	161811	NA	NA	NA	3819422	504259711	4966257	6226552	24720	133374	358316981	NA	NA	NA	3190411	74862055	NA	NA	48970002	130857273	34540861	NA	NA	NA	NA	NA	NA	NA	NA	NA	NA	NA	NA	NA	NA	NA	NA
ileon-666-FMT_61	253899	12992	2996	1122227	390195	5050	14522934.121	4350128.249	264686	25525008	2179277	144481446	40756	519797	15911756.733	NA	3696310	577207864	4819988	1540574	25011	55747	17792590	3097654.381	115927272.836	180291442.645	5269999	83991407	33104391.205	2113009.583	34936428	107336768	7262371	919413	30953329	4487598.649	25800021.909	29430.516	27194.868	1634743.083	2739407.067	2346169.399	2014020.062	8489548.529	292043.12	2826046.141	1929565.637	551758.285	1832842.171
ileon-667-FMT-AKK-Pas_62	291125	12411	9608	935135	173558	5465	4753280.242	4408217.816	369498	13668453	1897475	99567130	76584	207044	31990473.346	9758832.382	5333412	406541970	2707212	1769811	13831	46200	412304931	879070.189	36195452.052	408580230.049	5469555	70988998	34813164.944	373919.813	41590380	113904986	12838283	22673	19254352	3829922.494	37487770.064	66397.05	14808.635	1900700.488	2610892.815	1531631.546	2128730.769	6968415.684	379836.418	2147609.122	906372.408	534382.019	778850.694
ileon-684-SPF_79	382325	4025	4508	760147	463598	9885	16027021.515	4329161.254	434565	8398321	1903018	145209721	395665	274135	22912620.389	NA	4938779	734658256	2664192	8116236	27392	75257	177340606	2318628.93	161827868.149	366981502.069	1657445	65897420	35006389.528	1300331.411	31418460	106793043	32222553	121773	14520516	2566407.506	16320095.578	296264.637	22561.243	5356033.533	NA	6215045.622	8465007.141	16542406.677	1770489.306	9021557.777	5964076.63	1186643.506	6679292.162
ileon-668-FMT-AKK_63	273287	811	832	746526	295372	4023	26508151.475	9481426.446	681477	6724865	2128527	146227717	1782	84398	21454637.718	8270732.367	698879	583002131	4598153	1204622	18157	57523	361944283	4140007.766	304870701.104	549864296.699	12625013	82396987	31224072.943	2490625.197	45757458	117192905	9864954	28687	7016031	745646.986	37661409.745	79648.302	65655.231	4381112.076	3234883.341	3145806.868	5083214.191	3594519.004	1867915.75	5263946.161	3095434.459	1394490.232	3150560.569
ileon-690-ATB_85	120584	144	275	719588	238477	2106	596790.365	5222502.049	425534	7066365	2269732	74619732	4865	57870	21499881.035	3040087.554	1110670	372879951	8893118	3186842	20780	51848	25288164	1476324.481	55583497.371	131337948.723	246456	17748799	34505565.935	607184.84	40974278	111637137	21940390	3517	2383947	3854652.25	57060689.413	67948.344	53126.645	3318940.26	2600256.51	1910871.962	3587250.58	1830472.153	1425366.118	2425939.476	1729011.063	316437.511	1197153.159
ileon-681-FMT-AKK-Pas_76	339357	10287	6645	690533	170559	3877	4866333.597	3696422.558	342905	6659847	1192495	73177820	143867	259439	22347469.836	9458180.117	1993387	233905183	1408880	2908734	13688	42315	402198379	2177232.422	105482467.89	196674244.29	2916903	40160245	37879637.695	1224964.714	29655806	81674193	22444523	18552	14867223	5534156.652	29070812.956	123932.403	12579.581	1974909.955	2865982.006	1707296.553	2076705.242	6629017.273	456928.676	2718325.225	1377950.354	661726.424	1906925.76
ileon-670-FMT_65	390612	3239	1375	845829	352628	1824	21111583.516	6321771.491	346654	15580568	2772801	140455000	204183	211410	19094489.745	NA	4289419	460831663	7356866	5500515	19162	91678	59688136	2006767.098	40697683.193	257053630.273	10484576	97078366	46744458.123	1026530.683	47301781	119459547	31173638	69084	30770142	3557777.843	26290193.092	8724.862	NA	2391744.698	2768981.397	2529644.151	3732333.166	10745584.886	677416.545	3243584.917	2491011.185	620737.127	2266404.234
ileon-685-SPF_80	390133	7390	11688	711228	148184	8941	18433153.642	4612495.02	345993	6673830	1478498	92766013	328323	231707	39041291.464	NA	4760505	496295154	1771656	8800140	22534	65274	380383875	2284942.102	132253003.135	238060560.496	1643119	49602757	27231257.076	1173254.389	32517795	109743707	32621525	66586	11065602	3380257.832	25766579.714	83750.798	7529.969	1875454.432	2683719.954	2714711.263	2369679.699	7785243.386	473662.253	5344605.305	2650816.624	1101956.125	3827240.734
ileon-675-FMT-AKK_70	269245	376	880	282897	101908	4501	30527892.122	NA	279855	3880473	1499693	59798160	10905	56092	18428343.039	4605878.867	451695	244536437	2277087	10223628	14008	54778	276198758	1589508.209	121639487.947	51367739.822	802371	24287282	4299082.63	607814.44	24136664	71595414	44592511	4178	5394490	1985497.48	20216040.42	328273.507	100013.304	8892001.227	NA	4450161.302	10880384.19	17722856.277	4067794.979	5687504.522	7272113.602	733901.784	4989260.733
ileon-692-ATB_87	118542	114	749	2593905	343778	3611	908007.046	5126008.514	423628	9673310	2519603	70606923	910	57384	39600048.072	4143539.529	809629	275111135	7903438	382535	20588	49643	36839262	2036658.812	36374340.853	140181449.176	202351	16005664	41960056.402	842776.672	43995127	109670170	4695099	2911	4307117	4270762.899	53219069.307	60408.035	21177.082	1980979.625	2791468.307	973958.113	2013419.227	1053211.328	1019924.208	1385710.712	850684.746	283724.009	730244.436
ileon-683-FMT_78	1154740	16226	9057	1529678	495058	6455	12214621.896	5837783.84	310195	29323453	2224062	198204505	247272	311491	25978874.017	10518964.352	3608752	639829558	4878383	5004279	24547	65824	357400821	2161872.279	143024883.555	578897735.06	14221161	113589231	32319303.644	1140776.812	29747296	106527897	34538651	308256	23142140	3724955.511	31558732.085	299403.399	10681.865	3574316.252	2908708.128	2543369.878	4315291.945	16325939.889	1533015.524	3601832.19	2639560.832	807603.211	3361365.87
ileon-689-SPF_84	501163	1909	1094	509512	311958	17606	85408701.704	4009619.151	316509	6155272	1512952	102906654	286063	285860	39213380.981	8114248.077	4992968	417056646	2509825	4577164	18863	72769	16539155	1471075.181	75962576.844	267286360.54	2190365	69298320	22161387.056	908315.57	39388951	103458701	25220367	45282	4233018	4463405.331	27988490.386	92199.158	56182.502	4605058.548	2612848.107	3647074.794	5865646.122	10922041.681	1083525.538	5130968.528	4642497.667	849185.579	4583805.833
ileon-680-FMT-AKK_75	428533	501	956	533281	245536	5393	17727197.854	2935825.728	638385	5278000	1422430	114331455	4563	61616	33598310.685	9423797.186	606000	551848122	1532768	3256208	16653	53314	349587664	3983810.681	423219760.206	639448503.291	4635340	58556114	23739871.273	2314901.846	41812652	110974600	21023768	4017	3446661	4292060.878	25583455.155	288259.371	48176.887	6218103.897	NA	4145619.419	5937334.547	8563379.552	2454991.221	6730324.686	4487483.587	1416522.66	4572948.539
ileon-686-ATB_81	84885	164	355	299283	27210	3455	4133932.636	3925243.137	234944	3677301	2666453	49179264	9044	47339	11258369.911	2389540.863	656174	310641100	5808674	2594712	20567	45568	19109254	2150735.966	24802474.168	90369281.573	157743	14426880	48151278.864	894855.11	43487170	91720062	24599227	7131	3656787	5489178.071	30553196.219	NA	40023.227	1616818.297	2583992.795	1019347.179	1475897.213	1036622.466	530983.573	1736341.315	694981.309	540266.16	1366350.689
ileon-676-FMT-AKK-Pas_71	371842	6941	4087	1078237	346869	4281	5325202.051	3666288.797	598520	10664318	1584594	140657546	103073	177276	27511638.229	7844947.974	5359687	606039464	2238458	2716556	21110	52361	404507611	1488799.344	123813355.09	596351398.56	10773152	74364058	81764033.271	845727.657	36241583	117774503	20563869	11424	15037184	3895288.699	29976567.191	9530.759	5174.922	1524588.059	2762753.643	1268697.24	1705360.103	5657278.673	380195.877	2368922.443	1173637.971	596744.382	1535999.265
ileon-682-FMT_77	682346	9067	5750	884542	579566	14640	75599416.063	4152450.568	223678	5200778	1997658	127886502	427765	301971	12588247.255	NA	2948271	493517722	3430495	15515318	20980	106684	12553948	3087116.144	156217583.387	99322201.845	3513142	103673482	42787176.099	1847686.153	41166775	109964513	58217893	330665	10253181	3051247.304	24882398.491	164305.916	11609.535	3819855.344	2334278.645	3450611.017	5587080.168	16382299.346	1117450.888	4324818.128	4118830.853	772856.422	3768997.336
ileon-688-ATB_83	113302	51	256	364400	246916	1542	9046295.8	5022445.155	307661	3623418	7327025	57405733	2628	51204	9731028.123	4060758.395	1146313	109880574	30138790	700560	25348	79789	22479348	2040709.483	22780461.595	54807926.906	218178	7426421	40030245.951	841506.662	44345477	105870593	5773736	4448	3768063	5302735.55	26325896.389	8910.425	31546.779	1114970.01	2216034.075	792916.554	1303707.075	843359.285	804551.469	947850.918	669785.641	174400.01	611150.043
ileon-687-SPF_82	491946	1820	2312	782804	209105	9186	26732959.574	NA	283375	5880560	1366788	134912999	424100	211171	23392695.287	3553287.718	4544514	574204424	3014396	9587968	12364	65318	7730947	2936657.641	89224002.93	NA	2581265	107279701	25226354.72	1662198.356	38658790	104981272	25822707	477758	3067498	1289306.124	20225864.005	302053.997	31592.891	8580011.823	NA	5722850.036	12529024.597	21588042.148	3046761.436	6448789.715	7401133.554	1188236.604	5499534.016
ileon-679-FMT-AKK_74	122659	2481	2078	421696	138458	5994	23386591.259	3389232.221	323185	5434831	2417651	92830504	8012	118056	13708194.708	4146178.134	750534	453450051	6755445	5631830	25459	71858	410793785	4181083.778	104804488.157	223877725.367	1828046	46720400	24746315.238	2275609.979	36253134	104006859	36019899	5020	67520254	4005144.222	22438538.613	38719.511	64644.04	4239234.84	NA	3067400.02	4821636.841	7418768.514	1103397.933	5113802.932	3323672.98	1188438.443	3346398.665
ileon-673-FMT-AKK-Pas_68	207481	9657	2253	1040885	293678	3981	14349925.267	5457030.4	452121	12317818	3621222	141021719	21541	134201	22402739.96	4545726.617	1005376	323578419	9542380	2104241	23914	82872	463414310	1998777.695	41412750.264	171081572.887	2143386	51193116	61420745.608	930565.274	43085780	113869380	16366923	14513	28326038	2547359.495	30651402.764	13267.008	16103.839	2073516.866	2627341.787	1145768.349	2056181.92	3334015.966	554270.301	1622302.281	878442.736	392128.132	782656.756
ileon-691-ATB_86	162175	141	350	354974	124803	2544	1445041.608	5179511.769	353714	6693317	2377933	81669372	31574	38530	9467880.791	2241976.208	841460	418419211	6533345	26435972	20959	64425	52683199	1452822.01	211495394.302	172729622.36	139487	45227829	46514648.943	851510.44	38351300	110763385	100951259	2175	687492	3646921.459	38674866.742	9632.478	32103.483	4458973.192	2635052.252	3143727.065	5867315.819	2597978.817	1846710.472	4505062.604	4145668.436	769815.352	3798012.841
ileon-678-FMT_73	1407097	16178	8989	1738653	497016	6393	17901490.233	5306588.804	509593	19950886	1641441	172464986	328359	416291	70038195.358	24165534.454	8034037	723462358	2363826	12084968	18906	78729	35646685	1652775.196	218725545.337	1016650463.157	7352929	162240525	30404185.724	752952.737	42761347	115877534	59099492	530124	13652234	3404763.236	50091700.572	77121.141	NA	977441.268	2397136.958	1468565.215	1740951.222	8808847.83	327414.016	2924863.715	1238972.652	763480.754	2239677.26
ileon-677-FMT-AKK-Pas_72	438391	9627	10230	967155	203328	6484	12155748.692	4817164.571	510535	5575289	1517677	103735617	172970	324783	31642679.109	NA	8607606	347339480	1628518	4991428	19914	67442	193300534	4464862.582	211090549.931	194706327.708	4743141	62168299	32614496.542	1866090.795	39923367	109992691	42361477	21624	9108213	4064047.746	33243258.961	225897.962	9942.755	3497076.711	2355081.048	4699001.566	4748016.906	16668049.278	869791.592	9227852.545	4167025.537	1696210.949	6117296.384
ileon-693-SPF_88	1137645	881	4506	510146	309961	11442	24949490.682	NA	1493906	5194601	1443638	158431463	245883	147859	63923184.214	15248692.274	1801354	374513023	1891052	9977628	18071	104191	400332935	5032801.691	733786848.252	116520333.788	1851262	42886849	375922.721	2157769.93	32614017	97126295	26795431	33807	8033628	1688046.399	35554593.364	802208.266	134171.419	13401371.398	NA	18922559.975	27392384.73	20015042.194	5854673.731	36894221.101	24960458.657	4730152.506	35239009.93
ileon-672-FMT-AKK_67	126308	1319	893	709564	193407	3415	54462057.238	4647964.896	478598	5778384	3083060	90951252	5232	135183	23383252.423	5475214.442	1388948	454931182	7354380	4724372	26505	81248	401164690	1484618.603	40691536.563	124189120.212	1302759	32636178	54124945.48	566724.566	45092866	100231559	29804522	3804	9605126	1921647.358	42866200.967	77530.907	45295.019	4016804.802	2421490.9	1865843.275	3712577.014	7108555.868	1078933.826	2332286.782	1541837.33	634235.649	1303639.163
ileon-694-ATB_89	145017	112	281	394733	160709	2462	960473.45	4984705.92	396692	5741520	3099288	81309751	115572	77044	16671290.616	2907725.139	1349657	326929000	7973749	17876544	19589	102400	14590740	2000463.844	42782648.905	151598515.012	215731	23755110	37714154.79	1186193.943	41674314	97583345	61482236	3617	1428989	4148570.779	53322929.607	30739.67	21287.801	3532296.444	2850402.949	2438391.046	4009064.47	1869972.645	1054937.855	2643220.334	1705109.252	393166.749	1277323.582
ileon-671-FMT-AKK-Pas_66	325876	12276	5883	848899	104965	8088	6340494.357	3556249.07	397224	9997060	1719153	92157078	153869	295383	17415567.347	NA	4534264	353323924	2462086	3471136	21368	94088	543087204	1256902.341	14030168.613	81533898.44	3158875	35021108	35875875.597	436421.867	34641921	107163216	11962753	40410	15483137	3943763.364	28566197.594	19175.298	NA	2006166.705	2826025.896	1313171.248	2462373.308	7077850.181	407317.447	1974041.907	1269226.447	365129.859	1121146.324
ileon-695-SPF_90	940572	7764	8899	1666325	262006	12175	9571446.289	6584917.812	769153	29510740	1643713	239418956	404174	338512	100799472.532	17129454.522	15119225	692075240	3410224	7602379	24882	59353	226602149	3129597.054	316167206.696	1784710023.816	20719339	239289122	33046226.711	1868643.707	36403410	107930850	37629648	318426	6173274	4204300.427	81084836.955	102479.201	12048.203	3376840.311	2429814.544	4018155.639	4083834.311	12421037.69	971567.777	9262932.079	3829147.365	2304143.953	6967098.498
ileon-669-FMT_64	748693	3387	1387	500671	230794	13380	44309783.757	4608901.026	291195	5106049	1247703	158814156	441496	266032	27158983.249	8101068.916	1986783	484147841	1402497	5948056	18746	100482	18002588	2656933.334	128412562.712	314978282.463	2859835	57197408	26621369.834	1406049.116	43410142	106839683	27030923	147775	5408656	1674883.721	26354965.938	227824.563	19053.643	5920791.073	3263012.645	4355500.869	8111160.253	17687606.175	2236140.093	6361968.832	5549076.136	1096401.084	6252230.385
St_mix_pre	NA	444847	304004	NA	NA	180304	NA	288707011.509	NA	NA	NA	NA	NA	164961	4170.909	733339.681	NA	NA	NA	NA	NA	NA	NA	491378.195	282101.119	141047279.287	NA	NA	12430238.149	37766.671	NA	NA	NA	149096	56625	934101.855	24551.827	NA	NA	NA	3424433.358	168976.036	NA	NA	NA	NA	NA	NA	NA
St_BA1_pre	NA	NA	NA	NA	NA	NA	NA	NA	NA	NA	NA	NA	407985	NA	NA	NA	NA	NA	NA	11831	NA	NA	NA	NA	NA	NA	NA	NA	NA	NA	NA	NA	12493	NA	NA	NA	NA	NA	NA	NA	NA	NA	NA	NA	NA	NA	NA	NA	NA
St_AA_pre	669	NA	NA	18706	54993	NA	NA	NA	165	12340756	15330	1376481	NA	NA	NA	NA	1571	29380773	26	NA	175	4529	14906	NA	NA	NA	244	2083186	NA	NA	8059339	105285532	NA	NA	NA	NA	NA	NA	NA	NA	NA	NA	NA	NA	NA	NA	NA	NA	NA
St_BA2_pre	NA	NA	NA	NA	NA	NA	NA	NA	NA	NA	NA	NA	843	NA	NA	NA	NA	NA	NA	4331	NA	NA	NA	NA	NA	NA	NA	NA	NA	NA	NA	NA	1114509	NA	NA	NA	NA	NA	NA	NA	NA	NA	NA	NA	NA	NA	NA	NA	NA
St_AA_post	376856	NA	NA	46574	97719	NA	NA	NA	4158	23155327	25881	13098997	NA	NA	NA	NA	90654	76182667	3012	NA	536	12870	262708	NA	NA	NA	1219	4839210	NA	NA	7381594	152123001	NA	NA	NA	NA	NA	NA	NA	NA	NA	NA	NA	NA	NA	NA	NA	NA	NA
St_BA2_post	NA	NA	NA	NA	NA	NA	NA	NA	NA	NA	NA	NA	1209	NA	NA	NA	NA	NA	NA	7490	NA	NA	NA	NA	NA	NA	NA	NA	NA	NA	NA	NA	1460476	NA	NA	NA	NA	NA	NA	NA	NA	NA	NA	NA	NA	NA	NA	NA	NA
St_BA1_post	NA	NA	NA	NA	NA	NA	NA	NA	NA	NA	NA	NA	514922	NA	NA	NA	NA	NA	NA	40730	NA	NA	NA	NA	NA	NA	NA	NA	NA	NA	NA	NA	9841	NA	NA	NA	NA	NA	NA	NA	NA	NA	NA	NA	NA	NA	NA	NA	NA
[truncated: 188 more columns]

## Sheet: Height
Sid	2-aminoadipic acid@15.18-gc	2-hydroxy-3-methylbutyric acid@4.58-sf	2-hydroxybutyric acid@2.49-sf	2-hydroxyglutaric acid@13.17-gc	2-oxoglutaric acid@13.19-gc	3-hydroxybutyric acid@1.66-sf	3-indoxyl sulfuric acid@4.81-qpneg	3-methylhistidine@0.99-qppos	4-hydroxymandelic acid@15.38-gc	4-hydroxyproline@12.60-gc	5-aminovaleric acid@13.70-gc	5-oxoproline@12.53-gc	7,12-dihydroxy-3-oxocholanoic acid@7.12-ba	Acetic acid@1.78-sf	Acetylcarnitine@1.23-qppos	Acetylcholine@1.07-qppos	Adenine@16.39-gc	Alanine@7.03-gc	Allantoin@16.73-gc	Alpha-muricholic acid@5.96-ba	Alpha-tocopherol@29.54-gc	Anthranilic acid@13.60-gc	Arabinose@14.34-gc	Arachidic acid@23.82-qpneg	Arachidonic acid@20.30-qpneg	Arginine@0.98-qppos	Asparagine@14.30-gc	Aspartic acid@12.54-gc	Azelaic acid@9.84-qpneg	Behenic acid@25.11-qpneg	Benzoic acid@8.93-gc	Beta-alanine@11.33-gc	Beta-muricholic acid@6.26-ba	Butanoic acid@5.27-sf	Cadaverine@4.61-pa	Caprylic acid@13.50-qpneg	Carnitine@1.02-qppos	Carnitine C10:0@12.39-qppos	Carnitine C10:1@11.60-qppos	Carnitine C12:0@13.80-qppos	Carnitine C12:1@10.69-qppos	Carnitine C14:0@15.86-qppos	Carnitine C14:1@14.94-qppos	Carnitine C14:1(OH)@13.51-qppos	Carnitine C14:2@14.08-qppos	Carnitine C16:0@17.59-qppos	Carnitine C16:1@16.41-qppos	Carnitine C18:0@19.49-qppos	Carnitine C18:1@18.07-qppos
BlM_pre	1660	13	11	123677	924	57	NA	10165.187	19243	722074	4029	6036217	33	2386	4915.817	7017.725	47657	348539	787	738	475	16176	21554	90117.999	49606.565	211310.282	3838	304503	457898.071	9608.284	3794678	72639332	452	369	9199	NA	26626.542	976.362	NA	NA	590307.038	14763.386	NA	NA	NA	NA	NA	NA	NA
BlM_post	1233	8	17	22115	1869	59	NA	5522.29	1568	569527	32775	4854812	42	2395	2954.528	NA	11933	14147275	1030	1254	665	6732	86642	69804.995	98216.086	160775.845	1525	183239	1286767.519	8376.851	2450613	58730876	3256	193	10920	381357.535	17528.384	NA	NA	NA	439081.77	6527.839	NA	NA	NA	NA	NA	NA	NA
QC_ileon_5a	NA	575	521	NA	NA	774	1348418.884	658766.29	NA	NA	NA	NA	NA	26144	4129447.178	906141.492	NA	NA	NA	NA	NA	NA	NA	221293.374	19731536.044	75871346.529	NA	NA	6985669.497	159214.425	NA	NA	NA	10220	1808387	438048.076	5577358.972	22751.897	6969.182	337409.14	468024.658	185202.578	256251.707	1005876.284	129595.124	277472.892	192376.794	51228.659	223909.222
QC_ileon_6a	131378	NA	NA	554068	222765	NA	NA	NA	264310	6436611	1144136	60403600	18390	NA	NA	NA	1750527	166271482	3308772	883121	12842	47273	148943511	NA	NA	NA	3419506	47908780	NA	NA	28462321	75379002	3867088	NA	NA	NA	NA	NA	NA	NA	NA	NA	NA	NA	NA	NA	NA	NA	NA
QC_ileon_5b	NA	585	519	NA	NA	759	1471923.589	707191.911	NA	NA	NA	NA	NA	27528	4508552.339	1080251.347	NA	NA	NA	NA	NA	NA	NA	230213.501	16374895.592	86903851.023	NA	NA	6734229.82	129772.765	NA	NA	NA	10193	1722247	360454.095	6524593.075	20222.79	4326.121	360490.866	512348.559	207774.937	261857.678	1071444.607	143021.557	316351.818	216403.88	61447.547	216786.447
QC_ileon_6b	160046	NA	NA	571806	199884	NA	NA	NA	264882	6134657	1340685	66173131	17572	NA	NA	NA	1563683	166002255	2773067	911188	11382	55792	161355007	NA	NA	NA	2220607	40630605	NA	NA	25376658	71796886	3761402	NA	NA	NA	NA	NA	NA	NA	NA	NA	NA	NA	NA	NA	NA	NA	NA
QC_ileon_5c	NA	534	508	NA	NA	743	1397559.101	471135.998	NA	NA	NA	NA	NA	26625	3466657.388	861920.711	NA	NA	NA	NA	NA	NA	NA	191662.208	18852650.057	67614341.41	NA	NA	6800240.491	108335.205	NA	NA	NA	9745	1784409	432505.869	4843961.229	23733.679	4808.186	310597.918	418874.617	173360.362	226148.252	989654.318	123637.398	278677.568	180328.12	39058.134	182405.663
QC_ileon_6c	135848	NA	NA	573672	135535	NA	NA	NA	276022	5324837	1379196	63495004	18124	NA	NA	NA	1442976	158376214	2110408	903739	12250	64347	160873532	NA	NA	NA	2293396	40914757	NA	NA	25610179	65130702	4014377	NA	NA	NA	NA	NA	NA	NA	NA	NA	NA	NA	NA	NA	NA	NA	NA
QC_ileon_5d	NA	512	528	NA	NA	830	1471485.039	509225.969	NA	NA	NA	NA	NA	26506	3789991.216	963323.313	NA	NA	NA	NA	NA	NA	NA	262603.338	21932804.88	73740298.398	NA	NA	6802939.928	168699.212	NA	NA	NA	9930	1797316	444715.13	5387321.17	31258.78	6870.207	304441.89	478246.461	193584.635	211993.156	969561.62	136275.491	293652.866	202095.164	51686.179	203028.341
QC_ileon_6d	147701	NA	NA	545526	131580	NA	NA	NA	308782	5644482	1411711	64910037	18891	NA	NA	NA	1705834	166002820	3003881	953637	12084	59768	157149372	NA	NA	NA	3317351	37962133	NA	NA	27732059	78109187	4084060	NA	NA	NA	NA	NA	NA	NA	NA	NA	NA	NA	NA	NA	NA	NA	NA
QC_ileon_5e	NA	544	480	NA	NA	783	1405557.901	627194.201	NA	NA	NA	NA	NA	27411	4188875.48	1045387.362	NA	NA	NA	NA	NA	NA	NA	275524.856	19686792.113	81425169.059	NA	NA	6603566.044	124536.208	NA	NA	NA	10191	1798124	449914.4	5915835.599	38656.233	5099.297	309826.112	568999.741	194446.129	221050.246	1057830.692	140123.468	371089.531	193119.028	43495.008	233931.967
QC_ileon_6e	185670	NA	NA	651078	270022	NA	NA	NA	306375	6607090	1477901	87206221	18554	NA	NA	NA	1811966	165666832	2720772	937533	16287	85854	162422382	NA	NA	NA	1583561	45626473	NA	NA	30341135	84196188	4100793	NA	NA	NA	NA	NA	NA	NA	NA	NA	NA	NA	NA	NA	NA	NA	NA
ileon-666-FMT_61	91071	1290	369	629827	220555	641	893469.748	651969.783	158049	12940142	1199793	71100235	4778	59269	2229660.152	NA	1864215	166200787	2564921	260902	14499	32555	9242391	333598.767	14219239.198	34287081.478	3063982	43513367	5876650.821	261208.168	19761729	57511942	891872	66561	3948175	537542.541	4347898.385	5249.064	6941.292	170629.57	383259.501	161649.521	96005.245	1088191.457	31364.479	205414.528	125316.56	32476.61	121510.08
ileon-667-FMT-AKK-Pas_62	132813	1239	1278	601518	104072	643	406016.622	661432.902	221121	8259151	1110656	50828674	9020	24829	4499635.266	992262.015	2505538	166087688	1506366	253033	7748	33707	149474906	87925.75	4896003.308	86458892.806	2966093	44812897	6004960.406	42876.474	26968049	75580805	1577295	1698	2407082	520068.597	7016189.016	9390.154	4818.543	157930.793	378362.559	100183.34	113748.635	797482.755	42469.51	139348.561	57904.787	26266.878	45606.007
ileon-684-SPF_79	134764	419	570	482742	284711	1201	1013498.516	451649.308	256055	4920141	1125633	73909615	44768	33890	3154567.888	NA	2404533	166216452	1292617	1207629	16258	48826	107797353	253265.285	24931471.955	68475433.817	779356	40488835	6010310.237	141309.546	19801715	70018452	3787811	9638	1895790	323790.276	2421819.411	48817.992	9528.077	462344.614	NA	451669.891	533403.885	2060078.125	209361.367	561708.297	367339.207	67203.937	399607.572
ileon-668-FMT-AKK_63	92390	103	112	483589	180743	500	1674025.797	822863.966	399741	3999845	1120921	76077672	277	10568	3465941.107	1542499.018	337179	166100364	2469238	161655	10893	38934	162370413	426412.006	39120798.8	67740839.871	6713331	49378188	6135768.096	350639.387	29323783	76926828	1210725	2242	945285	233192.682	7593396.142	11849.617	12034.112	383682.421	573005.333	213290.275	283849.382	373842.409	184800.279	326116.228	181917.508	68086.47	200833.784
ileon-690-ATB_85	62430	10	48	432344	137479	288	94445.348	697650.823	253710	4070116	1390694	39662652	601	7188	3062660.934	366635.603	515475	140351275	4688826	411387	13124	32136	13445808	171008.218	8375577.784	24011362.322	118094	10065197	6411405.613	94970.979	24958408	67923572	2652295	259	355693	483529.216	10196554.672	12042.347	11605.364	327582.289	391827.958	120917.8	149413.661	160457.767	146601.177	139672.484	105783.128	20579.768	72024
ileon-681-FMT-AKK-Pas_76	112021	1021	879	458352	104879	455	377039.597	461366.703	207829	4053889	710441	37073574	17012	31048	3075121.438	961602.403	870993	109467831	699609	368016	7875	31028	159782645	253829.466	12912617.409	39807951.949	1457732	24587311	6671829.911	149092.337	17183267	53096055	2691481	1391	1929996	778222.65	5068421.137	21838.611	4797.152	171247.667	387029.796	115197.981	121026.573	743874.185	51282.261	162005.194	83556.584	32251.631	108605.347
ileon-670-FMT_65	117420	327	185	561212	214152	228	1315612.28	798232.344	202415	9444891	1612884	72176180	24251	26208	2527451.75	NA	2091824	165728454	3851813	1072255	11961	64513	35918998	254030.949	5706239.513	53922239.286	6271863	58517691	8282958.1	126529.002	30478933	79598576	3673475	5346	3857496	374103.055	3949857.648	3632.131	NA	210524.077	544291.961	175583.412	189122.303	1240068.41	78119.898	195142.238	132379.408	32813.189	122482.011
ileon-685-SPF_80	177066	716	1522	438926	87136	1058	1075414.342	659682.401	203378	3944316	869004	46983340	37419	27674	5804328.705	NA	2277651	166209895	927666	1359945	13724	47572	166198484	290811.878	18513976.459	52450987.975	769516	29330884	4524196.818	115361.907	20005831	71940776	3854697	5116	1401087	423712.026	4826418.226	23613.785	2857.71	143575.632	376682.855	170051.924	129562.9	883580.978	61928.645	345909.99	170285.063	55903.506	230242.325
ileon-675-FMT-AKK_70	122771	44	121	181923	62853	563	2136889.198	NA	163872	2298922	928175	32101681	1341	7028	2014198.919	660025.965	194850	122087991	1219022	1410476	9960	37305	146995353	168414.88	16302271.886	5938570.981	409806	14508119	951475.436	66174.672	12793014	46251571	5330844	326	736545	293018.591	2954263.199	50990.31	24254.611	733225.076	NA	299771.094	537462.99	2267316.158	367770.934	332610.942	437432.964	39116.495	272424.984
ileon-692-ATB_87	64599	19	95	1673266	214199	466	59276.189	657056.58	244979	5778471	1592284	38463882	143	7198	6145545.226	568998.961	396360	144386110	3946457	54207	12070	32631	21455384	258637.157	4683344.198	25448984.532	94784	9631700	7458853.473	101136.44	28092264	73140116	584525	310	613960	560460.049	9861850.545	10539.963	6421.08	184904.319	413993.633	65731.434	99939.9	100018.544	106276.357	93362.655	47820.029	16171.291	44604.229
ileon-683-FMT_78	330812	1566	1187	1001503	309757	758	782187.117	859150.597	182984	17900743	1210380	96359598	28968	36972	3934005.178	1658969.768	1806980	165821443	2500748	880166	15049	44578	161954876	226717.254	19506847.574	123839331.799	7789118	67295942	5695934.128	149225.063	17907463	70131643	4081062	23034	2998488	382677.863	5703627.611	54557.646	4415.426	322080.362	557622.328	170862.373	246016.259	1789419.111	168256.162	233737.842	157940.333	38100.835	202806.074
ileon-689-SPF_84	162183	208	136	342655	189094	2587	5241915.863	411261.206	183057	3708548	887837	51730968	32943	34434	5858767.121	549247.092	2376705	165765775	1305751	936832	12074	53880	9213626	176543.955	10336545.046	55178978.39	1009601	42294754	3585909.592	115558.313	23531469	67982381	3008984	3893	553973	503105.925	5540438.665	14191.631	10096.996	396947.821	434781.454	217688.053	295052.517	1249193.834	117880.708	329661.467	269197.212	45390.49	242974.647
ileon-680-FMT-AKK_75	148930	68	140	347876	137815	692	1070294.281	432630.588	380402	3177974	799707	57560274	600	7802	5266736.845	1795608.774	253293	165763792	783670	463157	11552	35983	165775332	399930.837	56526825.342	80188665.642	2400141	36195143	3746119.238	318752.334	26723533	72051400	2585611	348	461455	495878.55	4507757.384	41250.71	15085.726	518172.365	NA	270853.474	317156.617	946264.054	240893.302	400966.324	306102.653	72574.868	253309.778
ileon-686-ATB_81	42809	18	56	158138	15962	446	246049.216	620164.295	131555	1809865	1707984	23729870	1029	5955	1366857.715	262710.909	297618	164853480	3218547	363350	12171	27973	10385246	215320.814	3158583.309	15318714.205	55992	7144742	8421932.384	120821.215	21531348	44233865	2931733	600	556037	679328.032	5063203.773	NA	9848.74	150284.108	380858.585	58104.675	66056.505	100794.211	52898.767	98959.497	40855.763	27423.186	78069.668
ileon-676-FMT-AKK-Pas_71	142281	679	497	695321	205296	520	346181.739	626171.148	353160	6373294	900645	70562304	12620	21062	4024440.639	1197347.187	2702137	165829707	1170377	337241	13270	35197	154721722	158427.394	14278532.385	125631078.327	6228594	44418010	15407951.874	95213.941	22447099	78137362	2503302	914	1770442	538772.047	6028642.431	3961.296	2116.417	133242.383	391846.138	81034.381	86632.507	642463.717	45182.462	155169.268	66881.635	26552.795	91921.736
ileon-682-FMT_77	204585	938	798	568763	358968	1950	4620250.866	715696.185	130495	3128327	1230273	64039110	52008	36285	1321901.417	NA	1416717	166017383	1802369	2577548	13839	70522	7071519	314468.507	17528417.436	19574009.2	1914337	62916503	7186717.585	191153.701	25347708	71344749	6308533	24946	1282563	486943.448	4054781.968	37476.5	4843.822	338170.264	405630.496	220717.687	271646.58	1775305.098	132797.66	274270.949	245385.222	38659.34	242137.611
ileon-688-ATB_83	61845	9	34	227645	149275	202	1261186.309	518390.349	172466	2219695	4550939	30377678	299	6331	1084221.661	596556.313	552987	56879701	14888922	95462	14426	49912	12619305	218978.06	2837014.801	9304545.135	86690	4465520	7775119.914	109054.661	27410093	70853644	721916	342	474910	644879.82	3856616.251	2512.117	6352.188	106207.879	332533.293	44797.079	60588.856	70718.074	91947.461	61199.033	37189.265	9648.124	39210.025
ileon-687-SPF_82	156875	185	298	485804	133190	1222	1754902.664	NA	165882	3292550	832347	62536090	50624	25044	2776625.095	357288.372	2157131	166188245	1658393	1290001	6925	43496	4492096	339131.031	11873903.614	NA	1370735	59229841	4116709.788	184069.711	20873438	60582687	3161776	35759	398952	290481.4	3739161.142	48949.509	13330.463	736817.2	NA	341311.031	694327.368	2243497.151	354484.385	377471.672	471039.149	58981.809	329450.797
ileon-679-FMT-AKK_74	72152	284	262	257617	82676	766	2226864.532	324380.991	188692	3260659	1466357	46067970	1052	14150	1928478.326	629646.236	346406	166072891	3626529	796614	14832	42730	150246325	480419.504	14004463.296	40123828.254	690174	27506099	5610831.977	247558.247	21978310	67590466	4226504	412	7627381	462947.49	3427185.086	13794.246	23181.9	434217.934	NA	205091.639	257768.202	841237.806	107077.179	303318.689	200168.069	63458.452	188230.424
ileon-673-FMT-AKK-Pas_68	114364	938	282	672336	172976	496	908098.561	684925.03	251242	7362307	2065783	74696599	2699	16166	2883402.521	504006.894	497119	164332244	5066009	276952	14398	56558	159739478	213454.367	5511922.632	32010631.93	1109293	31609570	13434274.327	101041.313	26936747	75549405	2011811	1122	3659245	553085.757	4259605.49	5524.15	6710.669	196972.915	374148.756	70689.955	96903.071	358538.551	57457.107	107445.858	57875.171	19810.195	43915.191
ileon-691-ATB_86	84660	13	55	219921	80469	355	102140.268	749378.994	203530	4021383	1490176	42028803	3318	4893	1173944.618	323315.074	382564	166030447	3549253	3278265	13059	43802	30852750	154404.894	28273330.397	35633304.304	66198	27371131	8529131.791	88231.279	23278505	74029492	9872643	209	102308	389461.404	6810442.096	4019.685	8384.065	432858.852	343613.219	204970.803	333873.929	261785.887	196643.886	292991.734	262214.043	45244.438	220218.567
ileon-678-FMT_73	383880	1677	1196	1124982	302458	812	1047526.899	945850.724	294306	12400031	991388	84249750	38819	45907	11029221.913	2391400.279	4170292	165594247	1220405	2344163	11771	54928	21003573	154681.509	29356137.941	228481115.365	3931726	94152649	5575390.498	82059.663	26233041	74680142	6514997	38117	1721888	382570.314	10445935.002	13393.234	NA	85669.975	339520.331	99986.968	86169.63	986913.143	41549.93	175648.238	79560.671	37218.516	132359.429
ileon-677-FMT-AKK-Pas_72	202222	934	1363	616343	126939	760	764957.797	571584.31	293181	3358827	856234	53673465	21211	38007	4160021.79	NA	4421914	147396150	831633	742636	12293	42544	114103975	489228.191	28481875.772	41495969.649	2260491	38176903	5655980.04	213298.818	24116400	72200560	4883086	1724	1213569	506636.448	5805766.676	37745.311	4144.759	278327.866	347808.282	300850.75	259439.617	2121361.759	98516.295	607948.518	270446.34	75373.345	356919.273
ileon-693-SPF_88	415486	93	576	341893	185406	1495	1663380.768	NA	809796	3062736	844460	82662258	29446	17918	8319768.768	1916728.403	873104	156503404	963856	1433637	11291	75127	153108521	661378.203	90011594.228	14153738.862	528650	26053505	68355.255	223720.76	18962582	64032124	3072913	2613	1042550	248355.674	7016287.544	118193.65	26426.718	821661.293	NA	1318482.778	1621687.85	2531599.049	733994.091	2136223.078	1472891.326	191450.369	2171391.91
ileon-672-FMT-AKK_67	76211	141	108	433776	109514	418	3498353.999	472072.459	282312	3464352	1865319	45461225	595	16349	3192271.928	699268.185	660110	141592657	4006732	669796	17116	52278	162521905	157606.912	5487519.922	23415474.633	475810	18663463	10375660.011	57305.283	27389440	67086339	3545210	307	1291031	441314.448	7947985.851	16853.273	9746.041	403218.251	432328.649	125342.216	192433.373	786372.012	117459.468	154576.346	87629.128	31892.865	81815.049
ileon-694-ATB_89	85104	8	39	249316	99505	329	84193.067	681109.528	231403	3486222	1936703	42517033	13155	9675	2234203.101	400651.732	649291	164641134	4093875	2332256	11283	69958	8020690	228556.757	5169352.3	28464372.845	96221	14060829	7146489.866	132680.886	24428348	64567159	6757428	273	203525	575208.031	9460416.99	9733.593	8944.014	342668.391	388825.387	150854.887	198095.732	190920.117	113223.791	159719.306	103492.378	22495.595	78781.703
ileon-671-FMT-AKK-Pas_66	158161	1225	727	543427	59233	976	500317.086	475851.812	236429	6087776	969688	47168899	17912	34112	2542384.308	NA	2178632	164884954	1295489	634016	12842	64288	163153597	148172.402	1765770.444	17098126.947	1493109	21581061	5906424.151	49683.282	20581070	71466420	1470002	2923	2038206	475830.232	5101808.913	4457.582	NA	184425.903	399507.686	86019.145	120425.916	799615.366	48618.484	123799.48	75603.518	18005.289	63823.004
ileon-695-SPF_90	264302	777	1129	1003271	154601	1484	1332013.401	1156337.16	437478	15694176	1040407	116353796	49396	39493	16783978.091	2750803.179	8276088	165949013	1765501	1239516	13995	39734	126313854	332057.055	41470249.55	365741659.952	11153427	123541243	6086148.556	243016.506	19334532	63761349	4487458	23979	563082	419189.592	18255256.123	16989.858	5040.45	261640.972	444190.178	273487.435	221625.067	1412777.078	103337.668	602585.849	212133.869	126981.323	433548.764
ileon-669-FMT_64	174529	332	188	319642	139845	1843	2761602.669	618075.086	167665	3021946	749130	84195874	53989	30742	4350194.442	1049310.034	785504	165945710	730136	1091747	11798	68483	10275377	371801.601	17282778.88	62303162.341	1416412	35461451	4545664.854	180551.54	24633039	70109026	3229696	11345	723622	390821.999	5041244.644	37350.792	5835.796	527461.33	548335.549	304033.509	409662.124	1945103.624	254762.917	420747.148	344215.975	63539.956	343312.667
St_mix_pre	NA	38092	34180	NA	NA	24076	NA	49979570.086	NA	NA	NA	NA	NA	18682	1586.234	140734.86	NA	NA	NA	NA	NA	NA	NA	46636.288	21560.544	26809980.301	NA	NA	2028683.087	5506.436	NA	NA	NA	13448	8121	342298.667	5414.976	NA	NA	NA	501763.645	15508.425	NA	NA	NA	NA	NA	NA	NA
St_BA1_pre	NA	NA	NA	NA	NA	NA	NA	NA	NA	NA	NA	NA	49675	NA	NA	NA	NA	NA	NA	6309	NA	NA	NA	NA	NA	NA	NA	NA	NA	NA	NA	NA	NA	NA	NA	NA	NA	NA	NA	NA	NA	NA	NA	NA	NA	NA	NA	NA	NA
St_AA_pre	548	NA	NA	6768	27666	NA	NA	NA	159	7340566	9629	604118	NA	NA	NA	NA	516	20251842	57	NA	306	5277	8042	NA	NA	NA	140	1234138	NA	NA	4594630	71703503	NA	NA	NA	NA	NA	NA	NA	NA	NA	NA	NA	NA	NA	NA	NA	NA	NA
St_BA2_pre	NA	NA	NA	NA	NA	NA	NA	NA	NA	NA	NA	NA	114	NA	NA	NA	NA	NA	NA	NA	NA	NA	NA	NA	NA	NA	NA	NA	NA	NA	NA	NA	144438	NA	NA	NA	NA	NA	NA	NA	NA	NA	NA	NA	NA	NA	NA	NA	NA
St_AA_post	115452	NA	NA	21964	48929	NA	NA	NA	1377	12875727	17306	5762608	NA	NA	NA	NA	16678	39529652	1275	NA	377	9014	141638	NA	NA	NA	541	2657868	NA	NA	3371853	97694494	NA	NA	NA	NA	NA	NA	NA	NA	NA	NA	NA	NA	NA	NA	NA	NA	NA
St_BA2_post	NA	NA	NA	NA	NA	NA	NA	NA	NA	NA	NA	NA	108	NA	NA	NA	NA	NA	NA	NA	NA	NA	NA	NA	NA	NA	NA	NA	NA	NA	NA	NA	188421	NA	NA	NA	NA	NA	NA	NA	NA	NA	NA	NA	NA	NA	NA	NA	NA
St_BA1_post	NA	NA	NA	NA	NA	NA	NA	NA	NA	NA	NA	NA	60907	NA	NA	NA	NA	NA	NA	15160	NA	NA	NA	NA	NA	NA	NA	NA	NA	NA	NA	NA	1796	NA	NA	NA	NA	NA	NA	NA	NA	NA	NA	NA	NA	NA	NA	NA	NA
[truncated: 188 more columns]

## Sheet: AreaQCCorr
Sid	2-aminoadipic acid@15.18-gc	2-hydroxy-3-methylbutyric acid@4.58-sf	2-hydroxybutyric acid@2.49-sf	2-hydroxyglutaric acid@13.17-gc	2-oxoglutaric acid@13.19-gc	3-hydroxybutyric acid@1.66-sf	3-indoxyl sulfuric acid@4.81-qpneg	3-methylhistidine@0.99-qppos	4-hydroxymandelic acid@15.38-gc	4-hydroxyproline@12.60-gc	5-aminovaleric acid@13.70-gc	5-oxoproline@12.53-gc	7,12-dihydroxy-3-oxocholanoic acid@7.12-ba	Acetic acid@1.78-sf	Acetylcarnitine@1.23-qppos	Acetylcholine@1.07-qppos	Adenine@16.39-gc	Alanine@7.03-gc	Allantoin@16.73-gc	Alpha-muricholic acid@5.96-ba	Alpha-tocopherol@29.54-gc	Anthranilic acid@13.60-gc	Arabinose@14.34-gc	Arachidic acid@23.82-qpneg	Arachidonic acid@20.30-qpneg	Arginine@0.98-qppos	Asparagine@14.30-gc	Aspartic acid@12.54-gc	Azelaic acid@9.84-qpneg	Behenic acid@25.11-qpneg	Benzoic acid@8.93-gc	Beta-alanine@11.33-gc	Beta-muricholic acid@6.26-ba	Butanoic acid@5.27-sf	Cadaverine@4.61-pa	Caprylic acid@13.50-qpneg	Carnitine@1.02-qppos	Carnitine C10:0@12.39-qppos	Carnitine C10:1@11.60-qppos	Carnitine C12:0@13.80-qppos	Carnitine C12:1@10.69-qppos	Carnitine C14:0@15.86-qppos	Carnitine C14:1@14.94-qppos	Carnitine C14:1(OH)@13.51-qppos	Carnitine C14:2@14.08-qppos	Carnitine C16:0@17.59-qppos	Carnitine C16:1@16.41-qppos	Carnitine C18:0@19.49-qppos	Carnitine C18:1@18.07-qppos
BlM_pre	1774.838	57.9	75.694	199207.651	684.109	348.459	NA	53753.779	35097.255	1106645.572	6993.602	12850139.658	270.243	19701.315	19144.536	71478.848	178839.743	827872.529	1171.591	2462.345	69.533	26187.796	37769.821	789472.337	878010	934661.27	5289.241	464695.604	1767801.114	68302.266	7633861.421	109368843.919	3343.298	4564.666	64626.192	NA	145131.184	3664.034	NA	NA	4033367.081	114241.181	NA	NA	NA	NA	NA	NA	NA
BlM_post	3512.994	64.092	99.403	56580.478	7273.214	460.686	NA	51198.81	3204.242	1383369.104	18008.747	12128173.261	480.716	19128.855	15404.992	NA	74110.989	28295556.19	1454.195	6105.455	795.069	8606.317	156794.859	611002.35	1273290.511	931418.431	6120.618	391475.944	10661064.46	45451.652	7366195.89	109679406.76	20297.2	2148.605	72314.104	2602821.959	90625.586	NA	NA	NA	3191002.415	68859.105	NA	NA	NA	NA	NA	NA	NA
QC_ileon_5a	NA	5840.591	3948.214	NA	NA	6593.656	21200840.793	4680732.632	NA	NA	NA	NA	NA	224144.334	26062823.725	8003423.439	NA	NA	NA	NA	NA	NA	NA	2023545.205	131394311.783	357322555.233	NA	NA	39656346.628	1365207.995	NA	NA	NA	134635.244	12766735.876	3580251.802	29870394.024	141374.081	19782.968	3487890.124	2662030.132	2713624.792	4271700.286	8859432.316	1150401.047	4751838.187	3067791.967	840980.737	3525263.419
QC_ileon_6a	377856.226	NA	NA	1008420.419	369973.074	NA	NA	NA	487580.542	11209932.418	2116019.036	134783265.622	159799.361	NA	NA	NA	3585306.258	566238068.828	5503225.212	6054664.598	23346.036	92315.701	322478670.501	NA	NA	NA	5684103.663	79407260.355	NA	NA	46383002.157	121964762.198	33210422.205	NA	NA	NA	NA	NA	NA	NA	NA	NA	NA	NA	NA	NA	NA	NA	NA
QC_ileon_5b	NA	5911.164	3989.338	NA	NA	6407.395	23232159.641	5018746.863	NA	NA	NA	NA	NA	227273.476	30179627.471	8767600.533	NA	NA	NA	NA	NA	NA	NA	2251739.037	118739516.618	433639720.2	NA	NA	39047770.851	1178105.238	NA	NA	NA	135238.274	12564663.819	3422914.387	35152428.726	128218.861	13993.108	4047124.569	2863165.887	3142248.517	4792111.244	9456391.635	1364678.055	5046598.073	3402387.084	1059568.645	3871629.441
QC_ileon_6b	511304.166	NA	NA	882167.68	315033.731	NA	NA	NA	468852.528	9891157.693	2360901.445	130515108.457	144925.054	NA	NA	NA	3217877.959	448119365.714	4815304.241	6709579.71	21125.835	89667.119	328368917.72	NA	NA	NA	3809118.751	65321606.611	NA	NA	41622014.988	109710028.168	32162207.172	NA	NA	NA	NA	NA	NA	NA	NA	NA	NA	NA	NA	NA	NA	NA	NA
QC_ileon_5c	NA	5580.834	3923.85	NA	NA	6313.523	21336748.441	4381245.097	NA	NA	NA	NA	NA	225514.895	24899146.955	7393589.331	NA	NA	NA	NA	NA	NA	NA	1896461.355	136571517.39	340847054.243	NA	NA	38408043.171	951871.752	NA	NA	NA	128368.179	12672608.687	4099201.021	28265692.193	140151.448	21186.486	3384003.827	2515626.427	2659229.473	4268050.406	8470555.795	1144434.724	4655044.574	3035776.186	814843.449	3366746.263
QC_ileon_6c	363567.033	NA	NA	888798.606	219658.401	NA	NA	NA	465541.326	8867593.032	2414936.271	122736049.983	150358.669	NA	NA	NA	2963193.212	429407222.449	3909021.925	5848451.69	20029.269	96822.483	316295663.122	NA	NA	NA	4545510.12	64681868.573	NA	NA	41726418.295	102493122.807	33902139.804	NA	NA	NA	NA	NA	NA	NA	NA	NA	NA	NA	NA	NA	NA	NA	NA
QC_ileon_5d	NA	5642.304	4114.752	NA	NA	6608.86	22624554.677	4218444.881	NA	NA	NA	NA	NA	222035.915	27109847.965	8604262.444	NA	NA	NA	NA	NA	NA	NA	2471542.276	152965090.115	375112909.917	NA	NA	38954186.404	1464543.116	NA	NA	NA	135914.585	12734769.475	3650989.607	31292436.644	144508.26	25862.217	3697534.49	2777334.192	2904174.313	4385611.04	8803631.192	1296612.529	5050067.033	3275343.246	967744.793	3679688.397
QC_ileon_6d	393363.911	NA	NA	992070.303	264456.123	NA	NA	NA	528034.637	10905122.7	2322134.918	137566505.81	163413.518	NA	NA	NA	3544251.471	649849782.008	5852499.696	6227357.344	22759.306	104020.967	330746685.862	NA	NA	NA	6884363.277	72171708.284	NA	NA	46042156.256	122735892.507	33940176.526	NA	NA	NA	NA	NA	NA	NA	NA	NA	NA	NA	NA	NA	NA	NA	NA
QC_ileon_5e	NA	5970.117	3913.269	NA	NA	6554.693	23479279.864	5000451.243	NA	NA	NA	NA	NA	226080.612	28690419.332	9320018.582	NA	NA	NA	NA	NA	NA	NA	2463868.967	138346528.127	400480590.806	NA	NA	38158772.406	1124876.211	NA	NA	NA	135404.629	13002978.612	3794128.441	34186432.833	150061.452	18271.891	3801681.041	3041701.366	2891611.399	4293987.622	9716187.997	1267426.024	5122144.265	3142715.921	904235.151	3876539.464
QC_ileon_6e	520126.52	NA	NA	1026298.525	477554.932	NA	NA	NA	527725.355	11756535.483	2338453.749	157848306.672	162636.125	NA	NA	NA	3884101.442	549921214.4	5739812.674	5996436.194	24870.131	110544.654	347698829.28	NA	NA	NA	3905006.168	78208246.161	NA	NA	48186648.46	131835071.257	34303049.094	NA	NA	NA	NA	NA	NA	NA	NA	NA	NA	NA	NA	NA	NA	NA	NA
ileon-666-FMT_61	258498.711	12976.55	2960.969	1123434.301	357557.009	5034.704	14921488.415	4095476.073	275973.936	24147814.315	2389763.456	153216091.078	40574.924	527521.838	15159717.437	NA	3642418.622	535064493.177	4246781.431	1592208.512	24878.898	65694.988	18266920.696	3159761.327	119073443.902	170916904.253	4416118.501	80839781.057	33141533.313	2126809.062	35432664.429	106640159.985	7306428.619	920614.778	31245898.404	4343233.847	24980403.541	32043.086	31256.648	1578042.198	2745235.19	2249437.837	1918049.794	8413538.174	292434.981	2846101.268	1839464.087	498947.771	1781426.053
ileon-667-FMT-AKK-Pas_62	296056.754	12397.206	9502.967	936076.235	159937.465	5449.529	4846121.31	4209553.329	384221.532	12977225.705	2068430.818	105188277.353	76265.827	209918.249	30828073.032	9528661.914	5260623.146	378702995.848	2404781.836	1825210.909	13762.639	53871.917	422580249.995	891627.454	36894622.048	392237834.84	4635791.226	68493678.371	34841068.108	375662.961	42142850.99	113213190.646	12911087.255	22700.696	19424341.567	3741481.51	36573912.51	70857.394	16471.408	1850094.246	2615138.095	1483118.651	2050742.939	6920669.847	380225.972	2159250.202	873836.571	494822.863	762092.332
ileon-684-SPF_79	388340.498	4020.824	4461.988	760858.019	429689.853	9858.879	16222120.281	4186612.644	450635.405	8002900.641	2061866.901	152813509.679	394135.318	277685.283	22305077.529	NA	4876108.21	687789371.437	2386459.46	8352368.003	27266.157	86806.651	181444359.253	2339291.261	163776161.577	356264493.149	1421301.616	63742034.893	35023937.392	1304119.879	31806140.571	106190141.033	32392537.845	121911.829	14638253.471	2529175.605	16030260.056	310585.627	24373.548	5252110.963	NA	6071486.724	8238689.263	16460033.48	1771807.504	9057037.069	5807855.843	1122194.387	6574633.586
ileon-668-FMT-AKK_63	277266.27	810.222	824.142	747172.563	275311.81	4013.166	26650367.372	9271804.559	704781.148	6431156.51	2292552.824	153304468.613	1775.625	85408.561	21073085.251	8175576.76	690663.206	548478615.458	4152517.038	1237013.767	18079.746	65653.418	369693231.395	4156282.284	306488407.87	539089384.089	10950164.602	79898387.616	31230993.49	2493831.466	46280035.37	116580141.222	9913094.572	28717.251	7067268.343	740843.855	37213475.423	82198.892	69131.409	4324166.499	3237432.345	3097099.158	4992059.914	3582557.463	1868844.267	5277760.2	3041056.306	1343450.396	3117510.802
ileon-690-ATB_85	122198.488	143.873	272.612	720161.386	223534.208	2101.269	596250.734	5156855.145	438904.318	6781911.658	2430173.19	77935953.787	4848.999	58506.43	21282696.961	3020247.774	1098651.513	352515364.718	8096951.235	3265525.379	20698.64	58554.13	25785857.14	1475345.537	55533786.524	129875500.541	216207.074	17253008.127	34504273.082	607052.786	41404621.08	111099976.961	22038786.858	3520.408	2399261.528	3858866.122	56675697.074	69171.072	54700.335	3294462.174	2601415.62	1894074.779	3550710.175	1827023.142	1425766.97	2429539.563	1711759.091	309831.319	1190031.287
ileon-681-FMT-AKK-Pas_76	343503.399	10278.728	6592.376	691035.404	160773.368	3869.058	4834066.162	3680585.385	352729.608	6414619.018	1269233.915	76141721.66	143435.364	262039.193	22270588.05	9437183.694	1973681.751	222212417.353	1293245.383	2974166.839	13639.056	47285.674	409420027.98	2166637.426	104790658.056	195928155.704	2588178.229	39134643.422	37869201.34	1223006.822	29940079.497	81315278.174	22536313.659	18568.39	14948747.012	5578803.543	29004087.572	124684.928	12704.843	1969953.915	2866415.584	1702187.652	2069500.774	6624774.991	456972.289	2719693.805	1373268.047	657004.604	1903067.584
ileon-670-FMT_65	394915.63	3236.648	1365.161	846384.225	334321.445	1820.625	20861590.517	6339650.613	355602.882	15061990.246	2933300.776	145577794.143	203629.367	213322.856	19137821.824	NA	4251142.466	439994789.077	6809808.563	5612204.161	19100.169	101341.195	60654272.849	1989315.255	40220996.474	257697059.226	9412355.314	94838691.551	46721400.708	1023594.742	47710697.546	118985791.632	31288816.996	69139.123	30910027.586	3609334.563	26329959.9	8690.19	NA	2395700.847	2768705.895	2534635.554	3740874.472	10750110.493	677374.02	3242511.227	2496594.512	623667.898	2269425.441
ileon-685-SPF_80	393520.707	7385.782	11622.235	711596.359	142079.92	8927.998	18051758.558	4675721.838	353021.691	6497934.404	1545622.924	95425607.242	327622.48	233352.663	39470254.699	NA	4726954.137	478502463.311	1666864.834	8940406.515	22476.607	70644.855	385233877.515	2250179.96	129546188.301	240946934.805	1509036.824	48697566.044	27207685.766	1167371.176	32739405.323	109400148.007	32716303.509	66627.741	11092875.526	3466702.806	25955009.853	82158.495	7297.07	1890456.403	2682432.976	2740631.296	2395936.619	7801062.424	473518.927	5336082.036	2679581.882	1127264.663	3851898.095
ileon-675-FMT-AKK_70	271260.816	375.813	875.69	283023.399	98276.039	4495.304	29784590.244	NA	284752.868	3792078.416	1558252.983	61274329.424	10884.885	56438.487	18688540.165	4647712.198	448947.265	236954230.384	2160407.786	10364336.677	13977.215	58645.155	279234266.049	1561037.23	118709746.031	52168210.382	745557.756	23904431.687	4294695.702	604222.735	24278508.237	71402008.615	44704480.63	4180.279	5402013.57	2045496.966	20405923.13	320287.231	96061.827	8983366.054	NA	4504752.178	11035310.206	17769074.544	4066215.755	5675869.653	7373519.042	755598.285	5030540.713
ileon-692-ATB_87	119291.568	113.952	745.905	2594884.358	333395.259	3607.146	883033.326	5231707.247	429884.914	9486768.499	2602496.632	72077063.904	908.585	57682.773	40254117.588	4187545.394	805465.031	267885073.706	7559822.946	386969.235	20549.758	52588.853	37181114.734	1995432.951	35384687.419	142737152.683	190174.864	15792190.532	41911614.887	837144.198	44213514.885	109419761.143	4705036.929	2912.339	4308497.427	4417069.448	53803586.126	58694.455	20202.761	2004782.642	2789461.712	987932.392	2046956.725	1056421.207	1019461.576	1382399.131	864561.084	293548.654	737308.77
ileon-683-FMT_78	1160699.474	16220.467	9026.521	1530149.638	482813.491	6449.391	11846282.033	5970740.831	313931.468	28860832.89	2283638.763	201568367.305	246958.889	312810.76	26452712.403	10642292.612	3593587.794	626071748.954	4704472.464	5051444.259	24509.758	68996.913	360106968.478	2113875.401	138758295.608	590553520.462	13518375.355	112350500.261	32278341.394	1132409.044	29867830.18	106329218.191	34598144.655	308371.427	23124868.347	3865290.005	31941387.546	290046.393	10140.926	3621732.437	2906401.254	2583663.116	4394668.356	16380847.52	1532248.308	3592336.082	2687106.953	838513.308	3397262.049
ileon-689-SPF_84	503151.872	1908.498	1091.158	509632.868	306004.219	17594.191	82649251.788	4106533.975	319438.369	6080418.337	1544039.689	104247829.015	285783.524	286794.251	39972324.202	8215177.588	4976817.195	410139499.817	2440695.515	4610407.493	18840.977	75453.162	16635425.487	1436072.84	73534705.278	272997281.823	2106595.673	68716119.393	22131261.815	901171.239	39511693.959	103310206.385	25253873.338	45295.085	4225422.42	4644009.618	28348532.53	89146.214	53169.832	4669872.597	2610650.478	3708380.549	5980135.245	10961002.604	1082950.455	5116623.099	4731233.135	883694.279	4635736.665
ileon-680-FMT-AKK_75	429736.699	500.907	954.25	533370.589	242207.975	5390.452	17125094.415	3008894.323	642563.72	5232462.813	1443067.58	115384732.545	4559.862	61757.744	34267849.226	9544477.201	604611.102	545350330.569	1502747.627	3272832.403	16639.228	54699.332	351027539.609	3884139.458	408999531.016	653516450.992	4509080.419	58207284.486	23705918.361	2295748.326	41904885.723	110861772.401	21043419.265	4017.817	3437149.665	4474980.539	25922280.028	278439.123	45519.824	6308207.434	NA	4217367.968	6056657.52	8594824.719	2453650.005	6710956.32	4575797.689	1475810.503	4626285.455
ileon-686-ATB_81	85025.111	163.982	354.623	299312.561	26992.542	3454.053	3988739.223	4023425.182	235847.022	3658613.209	2689132.223	49445149.858	9040.399	47402.132	11483842.34	2420293.059	655289.334	308485238.938	5741509.568	2602373.19	20556.997	46260.512	19155492.341	2095084.138	23940704.942	92367339.064	155202.307	14376285.286	48080025.23	887195.308	43543547.207	91665221.086	24612536.296	7131.842	3643116.618	5731409.092	30959850.585	NA	37805.267	1640363.32	2581744.65	1037076.938	1505706.296	1040447.821	530692.053	1731319.883	708726.787	562992.668	1382366.347
ileon-676-FMT-AKK-Pas_71	371584.244	6941.309	4088.797	1078192.224	348041.213	4281.485	5133792.927	3753659.305	597555.398	10687187.257	1578961.284	140339029.637	103091.659	177178.264	28036635.293	7941163.693	5362728.131	607816634.887	2249430.754	2712917.924	21114.318	52029.992	404096784.237	1449369.927	119410762.592	608914331.888	10846954.068	74473983.46	81640159.105	838316.639	36221846.553	117804123.689	20558813.724	11423.442	14954060.272	4071370.332	30356792.097	9219.485	4901.179	1545745.722	2760462.203	1289724.737	1738179.41	5677178.334	379996.891	2362391.184	1195755.97	620650.927	1553157.771
ileon-682-FMT_77	681085.412	9068.109	5756.957	884444.051	584803.629	14644.566	72907480.288	4246705.634	222717.985	5230572.205	1978777.985	127115701.036	427966.364	301513.392	12817078.579	NA	2952734.105	497386380.975	3475521.125	15461351.818	20991.446	104895.01	12519976.6	3006125.119	150714706.412	101315282.951	3577687.531	104082654.518	42722969.5	1831648.598	41107019.169	110038278.99	58180689.44	330620.598	10188420.94	3187832.677	25183092.844	159187.806	11023.523	3870359.183	2332433.5	3505093.973	5689505.26	16437212.998	1116893.506	4313453.76	4192773.982	802336.406	3809112.075
ileon-688-ATB_83	112958.527	51.01	256.507	364333.749	250590.363	1542.787	8731739.251	5129538.108	305495.926	3657562.732	7213672.109	56838742.425	2629.999	51077.088	9897221.025	4105347.523	1149163.548	111298368.919	30791020.248	696627.968	25370.71	77604.019	22379558.712	1988434.112	21996847.804	55841167.024	224798.241	7474606.06	39971610.975	834376.37	44239837.843	105987224.808	5767776.971	4447.023	3741617.586	5534310.998	26624846.206	8649.267	30047.597	1128821.87	2214387.416	804679.78	1326161.557	846016.418	804174.224	945509.438	681082.719	180646.316	617262.653
ileon-687-SPF_82	489888.176	1820.506	2318.362	782607.512	213413.322	9192.513	25839280.8	NA	280625.427	5957205.546	1337680.323	133076706.91	424545.477	210444.408	23763481.577	3589506.634	4560124.05	584458763.857	3104831.497	9513732.456	12379.296	62861.361	7683604.44	2864348.027	86273307.059	NA	2690024.492	108241915.544	25190853.606	1648664.811	38531699.511	105140981.509	25785909.898	477612.21	3044203.244	1343355.185	20439070.134	293823.97	30196.234	8678956.822	NA	5801651.694	12729300.045	21651198.632	3045434.748	6433994.551	7516990.334	1227708.152	5550596.631
ileon-679-FMT-AKK_74	122004.83	2481.883	2085.322	421560.974	142107.545	5999.44	22647958.706	3450856.817	319189.939	5525358.955	2352162.094	91221668.726	8022.739	117536.309	13907892.765	4185029.03	753824.363	463805886.902	7015056.235	5576255.744	25499.188	68428.298	407587317.644	4083842.82	101529986.115	227477315.764	1926870.158	47255638.877	24713442.931	2258117.915	36101161.651	104208752.905	35954424.429	5018.039	66973569.605	4163437.136	22655973.462	37748.215	62011.122	4284173.308	NA	3106222.165	4892472.64	7438726.226	1102956.062	5103012.201	3371491.383	1224696.96	3374962.636
ileon-673-FMT-AKK-Pas_68	206129.643	9661.189	2262.679	1040477.747	303164.587	3985.404	13930584.064	5547569.027	445300.963	12568999.143	3501721.335	138040973.644	21576.121	133481.356	22700582.594	4584608.359	1010764.538	332631285.079	9992381.955	2079013.998	23960.136	78064.59	458998064.835	1955780.37	40215595.998	173591779.127	2285814.426	51910680.22	61345342.897	923953.053	42865178.438	114139539.103	16330746.828	14506.092	28085831.17	2640260.683	30922526.955	12962.754	15503.796	2093580.271	2625819.058	1159003.649	2083750.201	3342205.54	554067.599	1619175.886	889976.89	403038.956	788755.174
ileon-691-ATB_86	160932.629	141.072	351.774	354810.556	129560.93	2547.32	1406971.456	5257730.681	347443.12	6854232.963	2285854.077	79641655.834	31634.067	38286.418	9582470.883	2259437.366	846770.162	432229716.222	6897431.167	26066589.192	21006.595	60049.64	52092841.443	1424657.274	205983557.334	175036662.475	150458.249	45974823.245	46463240.436	846061.756	38120314.817	111072718.025	100690983.045	2173.779	681487.974	3766436.798	38986354.337	9431.053	31012.043	4498256.674	2633661.111	3176788.66	5938929.173	2603791.095	1846095.285	4497153.727	4195222.42	789302.46	3824960.224
ileon-678-FMT_73	1393050.406	16188.738	9048.149	1737608.659	521878.432	6403.823	17561145.563	5374326.726	497838.396	20578924.237	1559011.851	166899779.502	329174.284	412880.577	70754869.772	24324709.209	8100245.272	754770902.362	2537125.07	11865116.48	18962.031	71826.727	35126442.54	1629675.79	214612127.786	1028129651.255	8116327.814	165745180.826	30380022.857	749485.663	42425652.872	116299912.089	58900760.566	529737.991	13532047.632	3484619.601	50432897.118	75754.206	NA	984723.552	2396065.963	1481624.441	1758916.355	8825522.236	327321.714	2920517.878	1251493.777	779804.361	2253117.418
ileon-677-FMT-AKK-Pas_72	433513.378	9634.14	10305.241	966507.171	214703.015	6496.266	11978968.188	4875393.415	497419.684	5771363.376	1432933.212	100009619.522	173449.694	321811.524	31949312.345	NA	8686749.717	364143716.115	1762212.991	4890126.577	19979.828	60882.362	190157110.141	4417158.45	208053973.326	196788259.848	5295499.506	63667782.395	32594712.943	1859529.282	39574007.382	110439896.44	42202424.901	21606.408	9029903.197	4136595.489	33457716.055	222103.357	9670.856	3521752.599	2354084.309	4738575.029	4794416.494	16697935.441	869559.313	9214863.978	4206906.742	1730545.442	6152064.86
ileon-693-SPF_88	1123652.835	881.722	4542.635	509768.052	329197.085	11465.921	24711931.807	NA	1451515.491	5397040.661	1354745.431	152149321.03	246636.321	146364.9	64530507.037	15341961.992	1819682.765	394604776.221	2063499.801	9754193.936	18137.084	93041.544	393138387.295	4997619.631	726876017.086	117741850	2091144.442	44032459.632	375773.787	2152812.037	32298489.972	97563175.338	26684324.628	33776.61	7967424.26	1707665.033	35779478.832	788993.212	130572.818	13494084.942	NA	19078802.378	27654834.737	20050229.855	5853140.693	36843301.974	25194671.335	4824016.05	35435382.997
ileon-672-FMT-AKK_67	124610.411	1320.184	900.953	708989.237	206568.022	3422.819	54247502.81	4704395.018	463769.084	6025047.125	2876098.949	87015440.493	5249.55	133687.908	23610840.814	5509520.862	1404407.653	481682179.699	8090707.303	4608684.237	26610.997	71790.85	393288571.102	1480327.832	40532979.714	125522857.225	1488407.731	33590562.134	54116097.203	566186.95	44616086.824	100724613.834	29669264.908	3800.256	9531339.266	1930830.621	43143947.07	76222.921	44051.034	4045272.024	2420461.586	1881625.623	3749016.868	7121357.299	1078644.44	2328989.689	1556658.407	647130.328	1311080.98
ileon-694-ATB_89	142902.711	112.109	283.721	394385.96	172612.831	2468.126	962582.171	5049711.555	383368.891	6008021.586	2874128.878	77497791.723	115993.25	76118.416	16845567.375	2927290.934	1365970.12	347846614.459	8843872.002	17401441.158	19674.044	89529.485	14280073.393	2003683.325	42875550.756	153347244.609	249294.146	24510049.943	37717580.716	1186819.596	41196261.827	98104481.752	61179149.556	3613.131	1419093.724	4137596.694	53693969.215	30183.22	20660.722	3559181.099	2849102.078	2460542.622	4051328.467	1873588.501	1054634.064	2639208.621	1722713.463	401755.492	1285153.974
ileon-671-FMT-AKK-Pas_66	320743.927	12288.931	5944.537	848092.381	113392.769	8109.735	6397067.319	3608321.548	382824.623	10499517.976	1584570.72	87496382.586	154474.571	291552.847	17619950.224	NA	4593527.016	377819286.132	2753710.187	3371646.8	21468.283	81374.066	530600075.555	1265115.696	14153978.606	82589818.36	3693237.306	36225559.422	35889077.433	437354.974	34212623.091	107781897.788	11899098.909	40363.325	15390905.245	3901678.483	28789299.519	18786.3	NA	2023305.338	2824578.948	1326562.563	2491515.376	7093206.571	407185.853	1970680.868	1283937.261	374090.421	1128860.112
ileon-695-SPF_90	924690.064	7772.754	8998.676	1664626.449	284638.775	12210.026	9726873.577	6697073.603	739281.15	31104821.698	1506071.34	226453475.181	405882.209	333815.646	102175157.885	17279849.774	15331321.46	743676144.828	3845363.35	7368663.913	25007.297	50793.035	221017293.454	3166780.646	321244781.365	1811591726.554	24501482.27	248128897.947	33068281.879	1875895.091	35919657.368	108599470.178	37414698.625	318032.324	6143847.766	4123295.673	81821056.609	100067.814	11587.672	3410380.242	2428369.187	4065801.913	4140041.521	12452353.593	971203.101	9244611.092	3880759.114	2369969.782	7022822.419
ileon-669-FMT_64	734328.718	3391.347	1404.696	500090.481	253604.694	13423.82	45758132.898	4721999.053	278364.775	5420952.583	1129551.467	149067658.106	443618.831	261835.328	27692617.303	8203361.669	2018518.651	525417752.235	1607796.23	5740528.239	18853.422	84167.635	17498720.152	2720339.424	132563369.691	321810654.581	3460783.071	59607098.062	26656858.261	1416964.962	42754525.717	107592912.067	26855378.919	147567.08	5399114.401	1611067.011	26699133.832	220169.039	18016.969	6005387.435	3260226.856	4429826.994	8271886.541	17751653.096	2234935.388	6343914.197	5656752.527	1141640.682	6324136.047
St_mix_pre	NA	442637.869	289406.812	NA	NA	178030.189	NA	3388722.212	NA	NA	NA	NA	NA	175462.991	117.711	73472.347	NA	NA	NA	NA	NA	NA	NA	1004034.378	739626.571	2757792.617	NA	NA	12942232.345	47738.697	NA	NA	NA	149913.061	32692.532	287887.569	2274.832	NA	NA	NA	4004981.742	7593.384	NA	NA	NA	NA	NA	NA	NA
St_BA1_pre	NA	NA	NA	NA	NA	NA	NA	NA	NA	NA	NA	NA	400463.514	NA	NA	NA	NA	NA	NA	13578.5	NA	NA	NA	NA	NA	NA	NA	NA	NA	NA	NA	NA	12812.781	NA	NA	NA	NA	NA	NA	NA	NA	NA	NA	NA	NA	NA	NA	NA	NA
St_AA_pre	716.204	NA	NA	18782.536	39467.909	NA	NA	NA	193.357	9996949.23	21757.213	1720192.669	NA	NA	NA	NA	1485.777	22030608.742	16.075	NA	171.516	8448.984	16472.213	NA	NA	NA	124.697	1801576.438	NA	NA	8502766.708	102714184.009	NA	NA	NA	NA	NA	NA	NA	NA	NA	NA	NA	NA	NA	NA	NA	NA	NA
St_BA2_pre	NA	NA	NA	NA	NA	NA	NA	NA	NA	NA	NA	NA	827.698	NA	NA	NA	NA	NA	NA	4960.064	NA	NA	NA	NA	NA	NA	NA	NA	NA	NA	NA	NA	1142587.356	NA	NA	NA	NA	NA	NA	NA	NA	NA	NA	NA	NA	NA	NA	NA	NA
St_AA_post	368334.882	NA	NA	46510.253	109220.387	NA	NA	NA	3942.583	24850499.145	23013.017	12155283.046	NA	NA	NA	NA	92366.005	83907074.564	3539.143	NA	539.628	10440.961	254049.443	NA	NA	NA	1526.848	5080804.815	NA	NA	7250158.848	153389961.778	NA	NA	NA	NA	NA	NA	NA	NA	NA	NA	NA	NA	NA	NA	NA	NA	NA
St_BA2_post	NA	NA	NA	NA	NA	NA	NA	NA	NA	NA	NA	NA	1216.221	NA	NA	NA	NA	NA	NA	7166.94	NA	NA	NA	NA	NA	NA	NA	NA	NA	NA	NA	NA	1448710.01	NA	NA	NA	NA	NA	NA	NA	NA	NA	NA	NA	NA	NA	NA	NA	NA
St_BA1_post	NA	NA	NA	NA	NA	NA	NA	NA	NA	NA	NA	NA	518147.655	NA	NA	NA	NA	NA	NA	38889.751	NA	NA	NA	NA	NA	NA	NA	NA	NA	NA	NA	NA	9757.879	NA	NA	NA	NA	NA	NA	NA	NA	NA	NA	NA	NA	NA	NA	NA	NA
[truncated: 188 more columns]

## Sheet: AreaCorrLog2Cen
Sid	2-aminoadipic acid@15.18-gc	2-hydroxy-3-methylbutyric acid@4.58-sf	2-hydroxybutyric acid@2.49-sf	2-hydroxyglutaric acid@13.17-gc	2-oxoglutaric acid@13.19-gc	3-hydroxybutyric acid@1.66-sf	3-indoxyl sulfuric acid@4.81-qpneg	3-methylhistidine@0.99-qppos	4-hydroxymandelic acid@15.38-gc	4-hydroxyproline@12.60-gc	5-aminovaleric acid@13.70-gc	5-oxoproline@12.53-gc	7,12-dihydroxy-3-oxocholanoic acid@7.12-ba	Acetic acid@1.78-sf	Acetylcarnitine@1.23-qppos	Acetylcholine@1.07-qppos	Adenine@16.39-gc	Alanine@7.03-gc	Allantoin@16.73-gc	Alpha-muricholic acid@5.96-ba	Alpha-tocopherol@29.54-gc	Anthranilic acid@13.60-gc	Arabinose@14.34-gc	Arachidic acid@23.82-qpneg	Arachidonic acid@20.30-qpneg	Arginine@0.98-qppos	Asparagine@14.30-gc	Aspartic acid@12.54-gc	Azelaic acid@9.84-qpneg	Behenic acid@25.11-qpneg	Benzoic acid@8.93-gc	Beta-alanine@11.33-gc	Beta-muricholic acid@6.26-ba	Butanoic acid@5.27-sf	Cadaverine@4.61-pa	Caprylic acid@13.50-qpneg	Carnitine@1.02-qppos	Carnitine C10:0@12.39-qppos	Carnitine C10:1@11.60-qppos	Carnitine C12:0@13.80-qppos	Carnitine C12:1@10.69-qppos	Carnitine C14:0@15.86-qppos	Carnitine C14:1@14.94-qppos	Carnitine C14:1(OH)@13.51-qppos	Carnitine C14:2@14.08-qppos	Carnitine C16:0@17.59-qppos	Carnitine C16:1@16.41-qppos	Carnitine C18:0@19.49-qppos	Carnitine C18:1@18.07-qppos
BlM_pre	-7.505	-5.075	-4.764	-1.877	-8.38	-3.944	NA	-6.458	-3.52	-2.866	-8.173	-3.081	-7.646	-2.971	-10.319	-6.46	-3.644	-8.988	-11.673	-10.819	-8.174	-1.372	-11.386	-1.486	-6.767	-7.915	-8.601	-6.775	-4.019	-4.024	-2.324	0.054	-12.846	-2.636	-6.989	NA	-7.789	-4.298	NA	NA	0.599	-4.501	NA	NA	NA	NA	NA	NA	NA
BlM_post	-6.52	-4.928	-4.371	-3.693	-4.97	-3.541	NA	-6.528	-6.973	-2.544	-6.808	-3.164	-6.815	-3.013	-10.632	NA	-4.914	-3.893	-11.361	-9.509	-4.659	-2.977	-9.333	-1.856	-6.231	-7.92	-8.391	-7.022	-1.427	-4.611	-2.375	0.058	-10.244	-3.723	-6.827	-0.32	-8.468	NA	NA	NA	0.261	-5.232	NA	NA	NA	NA	NA	NA	NA
QC_ileon_5a	NA	1.582	0.941	NA	NA	0.298	0.942	-0.013	NA	NA	NA	NA	NA	0.537	0.092	0.347	NA	NA	NA	NA	NA	NA	NA	-0.128	0.458	0.664	NA	NA	0.468	0.297	NA	NA	NA	2.246	0.637	0.14	-0.104	0.972	-0.35	0.129	0	0.069	0.119	0.414	0.187	0.306	0.291	0.125	0.415
QC_ileon_6a	0.229	NA	NA	0.462	0.699	NA	NA	NA	0.277	0.475	0.069	0.31	1.562	NA	NA	NA	0.682	0.43	0.525	0.444	0.217	0.446	1.674	NA	NA	NA	1.469	0.642	NA	NA	0.279	0.211	0.432	NA	NA	NA	NA	NA	NA	NA	NA	NA	NA	NA	NA	NA	NA	NA	NA
QC_ileon_5b	NA	1.599	0.956	NA	NA	0.257	1.074	0.087	NA	NA	NA	NA	NA	0.557	0.304	0.478	NA	NA	NA	NA	NA	NA	NA	0.026	0.312	0.943	NA	NA	0.446	0.085	NA	NA	NA	2.253	0.614	0.075	0.131	0.831	-0.85	0.344	0.105	0.28	0.285	0.509	0.433	0.392	0.44	0.458	0.55
QC_ileon_6b	0.665	NA	NA	0.269	0.467	NA	NA	NA	0.22	0.294	0.227	0.264	1.421	NA	NA	NA	0.526	0.092	0.332	0.593	0.073	0.404	1.7	NA	NA	NA	0.891	0.36	NA	NA	0.123	0.058	0.386	NA	NA	NA	NA	NA	NA	NA	NA	NA	NA	NA	NA	NA	NA	NA	NA
QC_ileon_5c	NA	1.516	0.932	NA	NA	0.235	0.952	-0.109	NA	NA	NA	NA	NA	0.546	0.026	0.232	NA	NA	NA	NA	NA	NA	NA	-0.222	0.514	0.596	NA	NA	0.422	-0.223	NA	NA	NA	2.177	0.626	0.335	-0.184	0.959	-0.251	0.085	-0.082	0.04	0.118	0.35	0.18	0.276	0.276	0.079	0.349
QC_ileon_6c	0.173	NA	NA	0.28	-0.054	NA	NA	NA	0.21	0.136	0.259	0.175	1.474	NA	NA	NA	0.407	0.031	0.031	0.394	-0.004	0.515	1.646	NA	NA	NA	1.146	0.346	NA	NA	0.127	-0.04	0.462	NA	NA	NA	NA	NA	NA	NA	NA	NA	NA	NA	NA	NA	NA	NA	NA
QC_ileon_5d	NA	1.532	1	NA	NA	0.301	1.036	-0.164	NA	NA	NA	NA	NA	0.524	0.149	0.451	NA	NA	NA	NA	NA	NA	NA	0.16	0.678	0.734	NA	NA	0.443	0.399	NA	NA	NA	2.26	0.633	0.168	-0.037	1.003	0.036	0.213	0.061	0.167	0.157	0.405	0.36	0.393	0.385	0.327	0.477
QC_ileon_6d	0.287	NA	NA	0.439	0.214	NA	NA	NA	0.392	0.435	0.203	0.34	1.594	NA	NA	NA	0.665	0.628	0.613	0.485	0.181	0.618	1.71	NA	NA	NA	1.745	0.504	NA	NA	0.269	0.22	0.463	NA	NA	NA	NA	NA	NA	NA	NA	NA	NA	NA	NA	NA	NA	NA	NA
QC_ileon_5e	NA	1.613	0.928	NA	NA	0.289	1.09	0.082	NA	NA	NA	NA	NA	0.55	0.231	0.566	NA	NA	NA	NA	NA	NA	NA	0.156	0.533	0.828	NA	NA	0.413	0.018	NA	NA	NA	2.254	0.663	0.224	0.091	1.058	-0.465	0.253	0.192	0.161	0.127	0.548	0.327	0.414	0.326	0.229	0.552
QC_ileon_6e	0.69	NA	NA	0.488	1.067	NA	NA	NA	0.391	0.543	0.213	0.538	1.587	NA	NA	NA	0.797	0.388	0.585	0.43	0.309	0.706	1.782	NA	NA	NA	0.927	0.62	NA	NA	0.334	0.323	0.479	NA	NA	NA	NA	NA	NA	NA	NA	NA	NA	NA	NA	NA	NA	NA	NA
ileon-666-FMT_61	-0.319	2.733	0.525	0.618	0.649	-0.091	0.436	-0.206	-0.544	1.582	0.244	0.495	-0.416	1.772	-0.69	NA	0.705	0.348	0.151	-1.483	0.309	-0.045	-2.468	0.515	0.316	-0.4	1.104	0.668	0.21	0.937	-0.109	0.017	-1.752	5.02	1.928	0.419	-0.362	-1.17	0.31	-1.015	0.044	-0.202	-1.036	0.34	-1.789	-0.434	-0.447	-0.628	-0.57
ileon-667-FMT-AKK-Pas_62	-0.123	2.667	2.208	0.355	-0.511	0.023	-1.187	-0.167	-0.067	0.686	0.036	-0.048	0.495	0.443	0.334	0.598	1.235	-0.151	-0.67	-1.286	-0.545	-0.331	2.064	-1.311	-1.374	0.798	1.174	0.429	0.282	-1.564	0.141	0.104	-0.931	-0.322	1.242	0.203	0.188	-0.025	-0.614	-0.786	-0.026	-0.803	-0.939	0.058	-1.41	-0.832	-1.521	-0.64	-1.795
ileon-684-SPF_79	0.268	1.043	1.117	0.056	0.914	0.878	0.556	-0.174	0.163	-0.012	0.031	0.491	2.864	0.846	-0.132	NA	1.125	0.71	-0.681	0.908	0.441	0.357	0.844	0.081	0.776	0.66	-0.531	0.325	0.289	0.231	-0.265	0.011	0.396	2.103	0.834	-0.361	-1.002	2.107	-0.049	0.72	NA	1.231	1.067	1.308	0.81	1.236	1.212	0.541	1.314
ileon-668-FMT-AKK_63	-0.218	-1.268	-1.32	0.03	0.272	-0.418	1.272	0.973	0.808	-0.327	0.184	0.496	-4.93	-0.855	-0.214	0.377	-1.694	0.384	0.118	-1.847	-0.151	-0.046	1.871	0.91	1.68	1.257	2.414	0.651	0.124	1.166	0.276	0.146	-1.312	0.017	-0.216	-2.133	0.213	0.189	1.455	0.439	0.282	0.26	0.344	-0.892	0.887	0.457	0.278	0.801	0.238
ileon-690-ATB_85	-1.4	-3.762	-2.916	-0.023	-0.028	-1.352	-4.21	0.126	0.125	-0.25	0.268	-0.48	-3.481	-1.4	-0.2	-1.059	-1.025	-0.254	1.082	-0.446	0.044	-0.211	-1.971	-0.584	-0.784	-0.796	-3.248	-1.561	0.268	-0.872	0.115	0.076	-0.16	-3.011	-1.775	0.248	0.82	-0.06	1.117	0.047	-0.033	-0.45	-0.147	-1.863	0.497	-0.662	-0.551	-1.316	-1.152
ileon-681-FMT-AKK-Pas_76	0.091	2.397	1.68	-0.083	-0.504	-0.471	-1.19	-0.36	-0.19	-0.331	-0.669	-0.514	1.406	0.763	-0.135	0.584	-0.179	-0.92	-1.565	-0.581	-0.558	-0.519	2.018	-0.03	0.132	-0.203	0.334	-0.379	0.402	0.139	-0.352	-0.374	-0.127	-0.612	0.864	0.78	-0.146	0.79	-0.989	-0.695	0.107	-0.604	-0.926	-0.005	-1.145	-0.499	-0.869	-0.231	-0.474
ileon-670-FMT_65	0.293	0.73	-0.592	0.21	0.552	-1.559	0.919	0.424	-0.179	0.901	0.54	0.421	1.911	0.466	-0.353	NA	0.928	0.066	0.832	0.335	-0.072	0.58	-0.737	-0.153	-1.25	0.192	2.196	0.898	0.705	-0.118	0.32	0.175	0.346	1.285	1.912	0.152	-0.286	-3.052	NA	-0.413	0.057	-0.03	-0.072	0.694	-0.577	-0.246	-0.007	-0.306	-0.22
ileon-685-SPF_80	0.288	1.92	2.498	-0.041	-0.682	0.735	0.71	-0.015	-0.189	-0.312	-0.385	-0.188	2.598	0.595	0.691	NA	1.081	0.187	-1.199	1.007	0.163	0.06	1.93	0.025	0.438	0.095	-0.445	-0.064	-0.075	0.071	-0.223	0.054	0.41	1.231	0.434	0.093	-0.307	0.188	-1.789	-0.755	0.011	0.083	-0.715	0.231	-1.094	0.473	0.096	0.547	0.543
ileon-675-FMT-AKK_70	-0.249	-2.376	-1.232	-1.371	-1.214	-0.255	1.433	NA	-0.499	-1.089	-0.373	-0.827	-2.314	-1.452	-0.388	-0.438	-2.316	-0.827	-0.824	1.22	-0.523	-0.209	1.466	-0.503	0.312	-2.112	-1.462	-1.09	-2.739	-0.879	-0.655	-0.561	0.861	-2.763	-0.604	-0.668	-0.654	2.151	1.93	1.494	NA	0.8	1.489	1.419	2.009	0.562	1.556	-0.03	0.928
ileon-692-ATB_87	-1.434	-4.098	-1.464	1.826	0.548	-0.572	-3.643	0.147	0.095	0.234	0.367	-0.593	-5.897	-1.421	0.719	-0.588	-1.472	-0.65	0.983	-3.523	0.033	-0.366	-1.443	-0.148	-1.434	-0.66	-3.433	-1.688	0.548	-0.408	0.21	0.054	-2.387	-3.285	-0.93	0.443	0.745	-0.297	-0.32	-0.67	0.067	-1.389	-0.942	-2.654	0.013	-1.476	-1.536	-1.394	-1.842
ileon-683-FMT_78	1.848	3.055	2.134	1.064	1.083	0.266	0.103	0.338	-0.359	1.839	0.179	0.891	2.19	1.018	0.114	0.758	0.685	0.575	0.298	0.183	0.288	0.026	1.833	-0.065	0.537	1.389	2.718	1.143	0.171	0.028	-0.356	0.013	0.491	3.442	1.494	0.25	-0.007	2.008	-1.314	0.183	0.127	-0.002	0.16	1.301	0.601	-0.098	0.1	0.121	0.362
ileon-689-SPF_84	0.642	-0.032	-0.915	-0.522	0.425	1.714	2.905	-0.202	-0.333	-0.408	-0.386	-0.061	2.4	0.893	0.709	0.384	1.155	-0.036	-0.648	0.051	-0.092	0.155	-2.603	-0.623	-0.379	0.276	0.036	0.433	-0.373	-0.302	0.048	-0.029	0.037	0.675	-0.958	0.515	-0.179	0.306	1.076	0.55	-0.028	0.519	0.605	0.722	0.1	0.412	0.916	0.196	0.81
ileon-680-FMT-AKK_75	0.415	-1.962	-1.108	-0.456	0.087	0.007	0.634	-0.651	0.675	-0.625	-0.484	0.086	-3.569	-1.322	0.487	0.601	-1.886	0.376	-1.348	-0.443	-0.271	-0.309	1.796	0.813	2.096	1.535	1.134	0.194	-0.274	1.047	0.133	0.073	-0.226	-2.82	-1.256	0.462	-0.308	1.949	0.852	0.984	NA	0.705	0.623	0.371	1.28	0.804	0.868	0.936	0.807
ileon-686-ATB_81	-1.923	-3.573	-2.536	-1.29	-3.078	-0.635	-1.468	-0.232	-0.771	-1.141	0.414	-1.137	-2.582	-1.704	-1.09	-1.379	-1.77	-0.446	0.586	-0.774	0.034	-0.551	-2.4	-0.078	-1.998	-1.288	-3.726	-1.824	0.746	-0.325	0.188	-0.201	0	-1.992	-1.172	0.819	-0.052	NA	0.584	-0.959	-0.044	-1.319	-1.385	-2.676	-0.929	-1.151	-1.823	-0.454	-0.936
ileon-676-FMT-AKK-Pas_71	0.205	1.831	0.991	0.559	0.61	-0.325	-1.104	-0.332	0.57	0.406	-0.354	0.368	0.929	0.198	0.197	0.335	1.263	0.532	-0.766	-0.714	0.072	-0.381	1.999	-0.61	0.32	1.433	2.401	0.549	1.51	-0.406	-0.078	0.161	-0.26	-1.313	0.865	0.325	-0.081	-2.967	-2.363	-1.045	0.052	-1.004	-1.178	-0.228	-1.411	-0.703	-1.069	-0.313	-0.768
ileon-682-FMT_77	1.079	2.216	1.485	0.273	1.359	1.449	2.724	-0.154	-0.854	-0.625	-0.028	0.226	2.983	0.965	-0.932	NA	0.402	0.243	-0.138	1.797	0.064	0.63	-3.013	0.443	0.656	-1.154	0.801	1.032	0.576	0.721	0.105	0.062	1.241	3.542	0.311	-0.028	-0.35	1.143	-1.194	0.279	-0.191	0.438	0.533	1.306	0.144	0.166	0.741	0.057	0.527
ileon-688-ATB_83	-1.513	-5.258	-3.004	-1.006	0.136	-1.798	-0.337	0.119	-0.398	-1.141	1.838	-0.936	-4.363	-1.596	-1.305	-0.617	-0.96	-1.917	3.009	-2.675	0.337	0.195	-2.175	-0.153	-2.12	-2.014	-3.192	-2.767	0.48	-0.413	0.211	0.008	-2.094	-2.674	-1.134	0.768	-0.27	-3.059	0.253	-1.499	-0.266	-1.685	-1.568	-2.974	-0.329	-2.024	-1.881	-2.094	-2.099
ileon-687-SPF_82	0.604	-0.1	0.173	0.097	-0.095	0.777	1.228	NA	-0.52	-0.438	-0.593	0.292	2.971	0.446	-0.041	-0.81	1.029	0.475	-0.301	1.096	-0.698	-0.109	-3.718	0.373	-0.149	NA	0.389	1.089	-0.186	0.569	0.012	-0.003	0.067	4.073	-1.431	-1.274	-0.651	2.027	0.26	1.444	NA	1.165	1.695	1.704	1.592	0.743	1.584	0.671	1.07
ileon-679-FMT-AKK_74	-1.402	0.347	0.02	-0.796	-0.682	0.162	1.038	-0.453	-0.335	-0.546	0.221	-0.253	-2.754	-0.394	-0.814	-0.589	-1.568	0.142	0.875	0.326	0.345	0.014	2.011	0.885	0.086	0.012	-0.092	-0.107	-0.214	1.023	-0.082	-0.016	0.546	-2.5	3.028	0.358	-0.503	-0.934	1.298	0.426	NA	0.264	0.315	0.162	0.126	0.409	0.427	0.667	0.352
ileon-673-FMT-AKK-Pas_68	-0.645	2.308	0.137	0.508	0.411	-0.428	0.336	0.232	0.146	0.64	0.795	0.345	-1.327	-0.21	-0.107	-0.457	-1.145	-0.338	1.385	-1.098	0.255	0.204	2.183	-0.177	-1.25	-0.378	0.154	0.029	1.098	-0.266	0.165	0.115	-0.592	-0.968	1.774	-0.299	-0.054	-2.476	-0.702	-0.607	-0.02	-1.158	-0.916	-0.992	-0.867	-1.248	-1.495	-0.936	-1.745
ileon-691-ATB_86	-1.002	-3.79	-2.548	-1.045	-0.815	-1.074	-2.971	0.154	-0.212	-0.235	0.18	-0.449	-0.775	-2.012	-1.351	-1.478	-1.4	0.04	0.85	2.55	0.065	-0.175	-0.957	-0.634	1.107	-0.366	-3.771	-0.147	0.697	-0.393	-0.004	0.076	2.032	-3.707	-3.591	0.213	0.28	-2.934	0.298	0.496	-0.016	0.296	0.595	-1.352	0.869	0.226	0.742	0.033	0.533
ileon-678-FMT_73	2.111	3.052	2.137	1.247	1.195	0.256	0.671	0.186	0.307	1.351	-0.372	0.618	2.604	1.419	1.533	1.95	1.858	0.844	-0.592	1.415	-0.083	0.084	-1.525	-0.44	1.166	2.189	1.982	1.703	0.084	-0.568	0.151	0.142	1.259	4.222	0.721	0.101	0.652	0.071	NA	-1.696	-0.152	-0.804	-1.161	0.409	-1.626	-0.397	-1.003	0.016	-0.231
ileon-677-FMT-AKK-Pas_72	0.427	2.304	2.325	0.401	-0.087	0.276	0.119	0.045	0.305	-0.483	-0.494	-0.12	1.68	1.059	0.386	NA	1.959	-0.207	-1.118	0.136	-0.007	-0.155	0.912	0.998	1.121	-0.197	1.366	0.323	0.185	0.743	0.05	0.068	0.778	-0.393	0.137	0.348	0.06	1.623	-1.383	0.143	-0.177	0.873	0.286	1.329	-0.217	1.261	0.746	1.166	1.218
ileon-693-SPF_88	1.801	-1.146	1.143	-0.522	0.53	1.096	1.163	NA	1.85	-0.58	-0.575	0.485	2.188	-0.078	1.4	1.285	-0.297	-0.091	-0.891	1.132	-0.147	0.457	1.959	1.176	2.926	-0.938	0.026	-0.209	-6.253	0.954	-0.243	-0.111	0.116	0.251	-0.043	-0.928	0.157	3.452	2.372	2.081	NA	2.883	2.814	1.593	2.534	3.261	3.329	2.645	3.744
ileon-672-FMT-AKK_67	-1.371	-0.564	-1.191	-0.046	-0.142	-0.648	2.298	-0.006	0.204	-0.421	0.511	-0.321	-3.366	-0.208	-0.05	-0.192	-0.67	0.196	1.081	0.051	0.406	0.083	1.96	-0.579	-1.238	-0.845	-0.465	-0.599	0.917	-0.973	0.223	-0.065	0.269	-2.901	0.215	-0.751	0.427	0.08	0.805	0.343	-0.137	-0.459	-0.069	0.099	0.094	-0.723	-0.688	-0.253	-1.012
ileon-694-ATB_89	-1.174	-4.122	-2.858	-0.892	-0.401	-1.12	-3.519	0.096	-0.07	-0.425	0.51	-0.488	1.1	-1.021	-0.537	-1.105	-0.71	-0.273	1.209	1.967	-0.03	0.402	-2.824	-0.142	-1.157	-0.556	-3.043	-1.054	0.396	0.095	0.108	-0.103	1.313	-2.973	-2.533	0.349	0.742	-1.256	-0.287	0.158	0.098	-0.072	0.043	-1.827	0.062	-0.543	-0.542	-0.941	-1.041
ileon-671-FMT-AKK-Pas_66	-0.007	2.655	1.531	0.213	-1.008	0.596	-0.786	-0.389	-0.072	0.38	-0.349	-0.313	1.513	0.917	-0.473	NA	1.039	-0.154	-0.474	-0.4	0.096	0.264	2.392	-0.806	-2.756	-1.449	0.846	-0.49	0.324	-1.345	-0.16	0.033	-1.049	0.508	0.907	0.264	-0.157	-1.94	NA	-0.657	0.085	-0.964	-0.658	0.094	-1.311	-0.964	-0.966	-1.044	-1.228
ileon-695-SPF_90	1.52	1.994	2.129	1.186	0.32	1.187	-0.182	0.503	0.877	1.947	-0.422	1.059	2.907	1.112	2.063	1.457	2.778	0.823	0.007	0.728	0.317	-0.416	1.128	0.518	1.748	3.006	3.576	2.286	0.206	0.756	-0.09	0.044	0.604	3.486	-0.418	0.344	1.35	0.473	-1.122	0.097	-0.133	0.652	0.074	0.906	-0.057	1.266	0.63	1.62	1.409
ileon-669-FMT_64	1.188	0.797	-0.55	-0.549	0.154	1.324	2.052	-0.001	-0.532	-0.574	-0.837	0.455	3.035	0.762	0.18	0.382	-0.147	0.322	-1.251	0.367	-0.091	0.313	-2.53	0.299	0.471	0.513	0.753	0.228	-0.105	0.351	0.162	0.03	0.126	2.378	-0.605	-1.012	-0.266	1.611	-0.485	0.913	0.292	0.776	1.073	1.417	1.145	0.723	1.174	0.566	1.258
St_mix_pre	NA	7.825	7.136	NA	NA	5.053	NA	-0.479	NA	NA	NA	NA	NA	0.184	-17.664	-6.421	NA	NA	NA	NA	NA	NA	NA	-1.139	-7.015	-6.354	NA	NA	-1.147	-4.541	NA	NA	NA	2.401	-7.972	-3.497	-13.785	NA	NA	NA	0.589	-8.412	NA	NA	NA	NA	NA	NA	NA
St_BA1_pre	NA	NA	NA	NA	NA	NA	NA	NA	NA	NA	NA	NA	2.887	NA	NA	NA	NA	NA	NA	-8.356	NA	NA	NA	NA	NA	NA	NA	NA	NA	NA	NA	NA	-10.908	NA	NA	NA	NA	NA	NA	NA	NA	NA	NA	NA	NA	NA	NA	NA	NA
St_AA_pre	-8.814	NA	NA	-5.284	-2.53	NA	NA	NA	-11.024	0.309	-6.535	-5.982	NA	NA	NA	NA	-10.555	-4.254	-17.86	NA	-6.871	-3.004	-12.583	NA	NA	NA	-14.008	-4.82	NA	NA	-2.168	-0.037	NA	NA	NA	NA	NA	NA	NA	NA	NA	NA	NA	NA	NA	NA	NA	NA	NA
St_BA2_pre	NA	NA	NA	NA	NA	NA	NA	NA	NA	NA	NA	NA	-6.031	NA	NA	NA	NA	NA	NA	-9.809	NA	NA	NA	NA	NA	NA	NA	NA	NA	NA	NA	NA	-4.429	NA	NA	NA	NA	NA	NA	NA	NA	NA	NA	NA	NA	NA	NA	NA	NA
St_AA_post	0.192	NA	NA	-3.976	-1.062	NA	NA	NA	-6.674	1.623	-6.454	-3.161	NA	NA	NA	NA	-4.597	-2.325	-10.078	NA	-5.218	-2.699	-8.636	NA	NA	NA	-10.394	-3.324	NA	NA	-2.398	0.542	NA	NA	NA	NA	NA	NA	NA	NA	NA	NA	NA	NA	NA	NA	NA	NA	NA
St_BA2_post	NA	NA	NA	NA	NA	NA	NA	NA	NA	NA	NA	NA	-5.476	NA	NA	NA	NA	NA	NA	-9.278	NA	NA	NA	NA	NA	NA	NA	NA	NA	NA	NA	NA	-4.087	NA	NA	NA	NA	NA	NA	NA	NA	NA	NA	NA	NA	NA	NA	NA	NA
St_BA1_post	NA	NA	NA	NA	NA	NA	NA	NA	NA	NA	NA	NA	3.259	NA	NA	NA	NA	NA	NA	-6.838	NA	NA	NA	NA	NA	NA	NA	NA	NA	NA	NA	NA	-11.301	NA	NA	NA	NA	NA	NA	NA	NA	NA	NA	NA	NA	NA	NA	NA	NA
[truncated: 188 more columns]

## Sheet: RatioInfos
	Analyte	MetName	AnalyteNum	AnalyteDen
Uridine/UMP	Uridine/UMP	Uridine/UMP	Uridine@1.70-qpneg	UMP@1.38-qpneg
Xanthine/Guanine	Xanthine/Guanine	Xanthine/Guanine	Xanthine@18.51-gc	Guanine@20.28-gc
Xanthine/HXanthine	Xanthine/HXanthine	Xanthine/HXanthine	Xanthine@18.51-gc	Hypoxanthine@15.75-gc
HXanthine/Inosine	HXanthine/Inosine	HXanthine/Inosine	Hypoxanthine@15.75-gc	Inosine@25.08-gc
Uracil/Uridine	Uracil/Uridine	Uracil/Uridine	Uracil@10.20-gc	Uridine@1.70-qpneg
Urate/Xanthine	Urate/Xanthine	Urate/Xanthine	Uric acid@20.03-gc	Xanthine@18.51-gc
AcCarn/Carn	AcCarn/Carn	AcCarn/Carn	Acetylcarnitine@1.23-qppos	Carnitine@1.02-qppos
Glyc3P/Glycerol	Glyc3P/Glycerol	Glyc3P/Glycerol	Glycerol-3-phosphate@15.38-gc	Glycerol@9.36-gc
Glyc3P/GPCho	Glyc3P/GPCho	Glyc3P/GPCho	Glycerol-3-phosphate@15.38-gc	Glycerophosphorylcholine@1.02-qppos
Stearate/Linolenate	Stearate/Linolenate	Stearate/Linolenate	Stearidonic acid@18.89-qpneg	Linolenic acid@19.57-qpneg
Fum/Suc	Fum/Suc	Fum/Suc	Fumaric acid@10.23-gc	Succinic acid@9.82-gc
Pyr/Lac	Pyr/Lac	Pyr/Lac	Pyruvic acid;Oxaloacetic acid@6.36-gc	Lactic acid@6.49-gc
aHGA/aKG	aHGA/aKG	aHGA/aKG	2-hydroxyglutaric acid@13.17-gc	2-oxoglutaric acid@13.19-gc
Citrate/Oaa	Citrate/Oaa	Citrate/Oaa	Citric acid;Isocitric acid@15.97-gc	Pyruvic acid;Oxaloacetic acid@6.36-gc
Pyr/Malate	Pyr/Malate	Pyr/Malate	Pyruvic acid;Oxaloacetic acid@6.36-gc	Malic acid@12.14-gc
Oaa/Malate	Oaa/Malate	Oaa/Malate	Pyruvic acid;Oxaloacetic acid@6.36-gc	Malic acid@12.14-gc
Fum/Malate	Fum/Malate	Fum/Malate	Fumaric acid@10.23-gc	Malic acid@12.14-gc
Xylose/Xylitol	Xylose/Xylitol	Xylose/Xylitol	Xylose@14.27-gc	Xylitol@14.81-gc
Rib5P/Ribose	Rib5P/Ribose	Rib5P/Ribose	Ribose-5-phosphate@20.38-gc	Ribose;Ribulose@14.50-gc
Ribu5P/Ribo5P	Ribu5P/Ribo5P	Ribu5P/Ribo5P	Ribulose-5-phosphate@20.61-gc	Ribose-5-phosphate@20.38-gc
Sucrose/Raffinose	Sucrose/Raffinose	Sucrose/Raffinose	Sucrose@27.03-gc	Raffinose@31.36-gc
Cit/Arg	Cit/Arg	Cit/Arg	Citrulline@15.94-gc	Arginine@0.98-qppos
Tyr/Phe	Tyr/Phe	Tyr/Phe	Tyrosine@17.28-gc	Phenylalanine@13.78-gc
Glu/Gln	Glu/Gln	Glu/Gln	Glutamic acid@13.70-gc	Glutamine@15.40-gc
Orn/Arg	Orn/Arg	Orn/Arg	Ornithine@2.12-pa	Arginine@0.98-qppos
Cit/Orn	Cit/Orn	Cit/Orn	Citrulline@15.94-gc	Ornithine@2.12-pa
Put/Orn	Put/Orn	Put/Orn	Putrescine@4.53-pa	Ornithine@2.12-pa
Kyn/Trp	Kyn/Trp	Kyn/Trp	Kynurenine@21.46-gc	Tryptophan@21.89-gc
Ser/Gly	Ser/Gly	Ser/Gly	Serine@10.51-gc	Glycine@9.78-gc
Asn/Asp	Asn/Asp	Asn/Asp	Asparagine@14.30-gc	Aspartic acid@12.54-gc
Pyr/Ala	Pyr/Ala	Pyr/Ala	Pyruvic acid;Oxaloacetic acid@6.36-gc	Alanine@7.03-gc
Pyr/Ser	Pyr/Ser	Pyr/Ser	Pyruvic acid;Oxaloacetic acid@6.36-gc	Serine@10.51-gc
aKG/Glu	aKG/Glu	aKG/Glu	2-oxoglutaric acid@13.19-gc	Glutamic acid@13.70-gc
Oaa/Asp	Oaa/Asp	Oaa/Asp	Pyruvic acid;Oxaloacetic acid@6.36-gc	Aspartic acid@12.54-gc
Asp/Malate	Asp/Malate	Asp/Malate	Aspartic acid@12.54-gc	Malic acid@12.14-gc
Urea/Arginine	Urea/Arginine	Urea/Arginine	Urea@8.84-gc	Arginine@0.98-qppos
Serine/PSerine	Serine/PSerine	Serine/PSerine	Serine@10.51-gc	Phosphoserine@0.98-qppos
Carnosine/BetaAla	Carnosine/BetaAla	Carnosine/BetaAla	Carnosine@1.00-qppos	Beta-alanine@11.33-gc
Val/KIV	Val/KIV	Val/KIV	Valine@8.55-gc	Ketoisovaleric acid@7.47-gc
BetaAla/Asp	BetaAla/Asp	BetaAla/Asp	Beta-alanine@11.33-gc	Aspartic acid@12.54-gc
HOPro/Pro	HOPro/Pro	HOPro/Pro	4-hydroxyproline@12.60-gc	Proline@9.64-gc
Anthr/Kyn	Anthr/Kyn	Anthr/Kyn	Anthranilic acid@13.60-gc	Kynurenine@21.46-gc
GABA/Glu	GABA/Glu	GABA/Glu	GABA@12.61-gc	Glutamic acid@13.70-gc
Spmd/Put	Spmd/Put	Spmd/Put	Spermidine@6.61-pa	Putrescine@4.53-pa
AcPut/Put	AcPut/Put	AcPut/Put	N-acetylputrescine@3.33-pa	Putrescine@4.53-pa
SAM/Met	SAM/Met	SAM/Met	S-adenosylmethionine@4.07-pa	Methionine@12.49-gc
Glu/Oxoproline	Glu/Oxoproline	Glu/Oxoproline	Glutamic acid@13.70-gc	5-oxoproline@12.53-gc
AcSpmd/Spmd	AcSpmd/Spmd	AcSpmd/Spmd	N1-acetylspermidine@5.22-pa	Spermidine@6.61-pa
AcSpmd/Spmd_1	AcSpmd/Spmd_1	AcSpmd/Spmd	N8-acetylspermidine@5.41-pa	Spermidine@6.61-pa
DiAcSpmd/AcSpmd	DiAcSpmd/AcSpmd	DiAcSpmd/AcSpmd	N1,N8-diacetylspermidine@4.39-pa	N1-acetylspermidine@5.22-pa
DiAcSpmd/AcSpmd_1	DiAcSpmd/AcSpmd_1	DiAcSpmd/AcSpmd	N1,N8-diacetylspermidine@4.39-pa	N8-acetylspermidine@5.41-pa

## Sheet: Ratio
	Uridine.UMP	Xanthine.Guanine	Xanthine.HXanthine	HXanthine.Inosine	Uracil.Uridine	Urate.Xanthine	AcCarn.Carn	Glyc3P.Glycerol	Glyc3P.GPCho	Stearate.Linolenate	Fum.Suc	Pyr.Lac	aHGA.aKG	Citrate.Oaa	Pyr.Malate	Oaa.Malate	Fum.Malate	Xylose.Xylitol	Rib5P.Ribose	Ribu5P.Ribo5P	Sucrose.Raffinose	Cit.Arg	Tyr.Phe	Glu.Gln	Orn.Arg	Cit.Orn	Put.Orn	Kyn.Trp	Ser.Gly	Asn.Asp	Pyr.Ala	Pyr.Ser	aKG.Glu	Oaa.Asp	Asp.Malate	Urea.Arginine	Serine.PSerine	Carnosine.BetaAla	Val.KIV	BetaAla.Asp	HOPro.Pro	Anthr.Kyn	GABA.Glu	Spmd.Put	AcPut.Put	SAM.Met	Glu.Oxoproline	AcSpmd.Spmd	AcSpmd.Spmd_1
ileon-666-FMT_61	2.04612	4.00934	0.277245	2.39173	0.186713	0.36732	0.616734	0.0311455	0.310382	0.0194095	1.18531	0.0101194	2.87607	2.31494	0.873971	0.873971	2.64352	20.802	0.00863665	0.0149351	0.0929476	0.0966401	0.453034	13.5057	0.00463733	20.8396	31.5154	0.000723278	0.526007	0.0627445	0.00806135	0.160547	0.000933549	0.0553994	15.7758	7.37666	50.4218	0.040333	9543.37	1.27795	0.101677	0.336224	0.0201391	1.30756	0.154875	0.00112892	2.89289	0.814339	0.0175197
ileon-667-FMT-AKK-Pas_62	13.2861	2.40658	0.254641	1.61475	0.120173	1.15552	0.853358	0.0618422	0.036054	0.0254487	1.25072	0.0174617	5.38803	0.0840787	3.96137	3.96137	2.15115	643.908	0.0016962	0.0335327	0.105646	0.0868173	0.427265	17.9025	0.00114227	76.0041	16.561	0.000297333	0.588874	0.0770479	0.0427476	0.466883	0.000508903	0.244808	16.1815	2.72727	54.2923	0.0404788	2715.83	1.60454	0.281239	0.558544	0.0128384	1.39541	0.23987	0.000501594	3.42526	3.22155	0.0691208
ileon-684-SPF_79	71.3878	4.35543	0.315587	4.33023	0.250011	0.88485	1.40395	0.0377428	1.34766	0.0287426	0.980523	0.0116031	1.63967	0.175684	1.88288	1.88288	2.7149	790.343	0.00106258	0.00500964	0.0326003	0.0586263	0.463562	14.5687	0.00132671	44.1892	10.2284	0.00031835	0.328417	0.0251519	0.011058	0.469837	0.00127918	0.12328	15.2732	3.05354	34.4698	0.0378239	5965.1	1.6206	0.121215	0.634903	0.0271705	4.72079	0.100464	0.00171126	2.49583	0.998041	0.0230854
ileon-668-FMT-AKK_63	4.16022	22.2792	1.08028	3.53462	0.20081	0.718397	0.569672	0.0680237	0.151559	0.0154702	2.46215	0.0162363	2.52741	0.71504	1.10912	1.10912	3.16845	145.49	0.0078915	0.0297368	0.0633799	0.0498146	0.483955	7.97521	0.000345205	144.304	43.5336	0.000367168	0.78696	0.153222	0.0100802	0.0915907	0.000766656	0.0713225	15.5507	1.95604	202.676	0.0149003	10246.8	1.4223	0.0659104	0.311307	0.0123734	1.36275	0.0893306	0.00011979	2.63475	1.69761	0.0267481
ileon-690-ATB_85	177.581	4.56285	0.823729	1.21446	0.114602	2.10714	0.37679	0.0972319	0.0731295	0.0163744	1.1573	0.0926545	3.01743	1.3925	1.94894	1.94894	8.59385	5.89378	0.0046601	0.0151063	0.0231981	0.0330327	0.525987	11.3159	0.000876365	37.6928	1.68184	0.000612751	0.224612	0.0138858	0.00829072	0.632481	0.00267962	0.174178	11.1894	7.98258	104.497	0.0309849	536.487	6.28984	0.769599	0.656861	0.207051	50.1349	4.42565	0.00245778	1.19267	0.759939	0.056283
ileon-681-FMT-AKK-Pas_76	4.91265	2.54593	0.247586	1.7634	0.144341	1.14915	0.768725	0.0734993	0.0476125	0.0281269	1.14163	0.0171896	4.04865	0.0915983	4.74767	4.74767	2.93629	925.931	0.00313876	0.0448481	0.108003	0.0492077	0.393656	25.4354	0.00407817	12.0661	18.6568	0.000587503	0.493259	0.0726316	0.0580208	0.82921	0.000659835	0.33793	14.0492	4.73625	30.1624	0.0458751	2161.96	2.03371	0.604183	0.513164	0.0119163	0.70813	0.122154	0.000223388	3.53232	3.71331	0.0662173
ileon-670-FMT_65	6.18564	1.80674	0.19623	1.91547	0.116216	0.995947	0.726297	0.0645825	0.673931	0.0251926	1.08749	0.0128131	2.39864	0.405799	1.23026	1.23026	2.32064	34.3381	0.00615349	0.0187835	0.0285922	0.0939879	0.475949	10.4431	0.00261017	36.0083	24.9894	0.000198104	0.534977	0.108001	0.0162407	0.201057	0.000974786	0.0770949	15.9577	4.35546	73.4495	0.0525126	5178.23	1.23055	0.343443	0.750063	0.0134281	1.36834	0.268976	0.000576767	2.57555	1.54046	0.0321156
ileon-685-SPF_80	3.25233	4.34377	0.440273	1.14821	0.218427	1.0152	1.51519	0.053499	0.0984855	0.0300746	0.732248	0.00910703	4.79963	0.136556	1.67175	1.67175	2.30054	506.602	0.00449929	0.0349528	0.0300575	0.0971379	0.457817	20.4244	0.00444034	21.8762	11.0535	0.000455785	0.274366	0.0331256	0.0140544	0.570251	0.000509863	0.14062	11.8884	4.32236	18.54	0.0373059	8411.28	2.21245	0.163296	0.502127	0.0267128	1.466	0.0395526	0.00169191	3.13299	1.35364	0.0298029
ileon-675-FMT-AKK_70	272.084	4.25886	0.496835	1.13108	0.161311	1.36614	0.91157	0.0596024	0.520114	0.020669	1.73967	0.028122	2.776	0.0591176	6.47719	6.47719	6.76569	100.452	0.00267196	0.0113892	0.0615877	0.138939	0.429814	13.2754	0.00133428	104.13	71.0004	0.000430943	0.447192	0.0330367	0.02743	0.580847	0.00105118	0.276179	23.4529	19.0056	58.5248	0.00598828	6446.57	2.94786	0.311665	0.867702	0.0170347	0.156585	0.340133	0.000138848	1.62122	42.3719	0.496263
ileon-692-ATB_87	36.7266	4.47961	0.452621	3.78043	0.141904	1.58725	0.744095	0.069063	0.0832798	0.0161427	0.647247	0.0306309	7.54529	3.10278	0.499252	0.499252	3.68772	12.875	0.00585033	0.0373571	0.0341773	0.0428315	0.491498	13.9798	0.000582759	73.4977	4.00469	0.00135269	0.488599	0.0126425	0.00952374	0.263185	0.00375606	0.163697	3.04985	8.14532	#N/A	0.0326486	885.675	6.85196	1.12385	0.465227	0.0513789	4.98075	1.67427	0.00107379	1.29628	3.972	0.192599
ileon-683-FMT_78	2.74578	5.81128	0.253716	9.19644	0.404612	0.54181	0.823191	0.028229	1.1182	0.0200813	0.810902	0.0233487	3.0899	0.0827276	3.25656	3.25656	1.86712	250.529	0.00579843	0.0314048	0.157857	0.11838	0.618261	6.43688	0.00261487	45.2719	5.53955	0.000248651	0.648672	0.125198	0.037658	0.339043	0.00116657	0.212121	15.3523	1.86651	48.8889	0.0603448	2582	0.937834	0.179343	0.36362	0.0196668	1.5367	0.224749	0.000177251	2.14107	2.83593	0.0528671
ileon-689-SPF_84	13.9311	4.30238	0.235212	2.24964	0.126106	0.623063	1.40105	0.0565917	0.1584	0.0204357	2.49189	0.01901	1.63327	0.453594	0.676328	0.676328	3.13781	351.628	0.00312376	0.00449525	0.0169049	0.0669011	0.466228	23.6918	0.00208542	32.0804	15.8944	0.000282608	0.585584	0.0316078	0.00897317	0.164897	0.00107612	0.0540031	12.5239	3.53993	51.2062	0.0486407	3620.91	1.49295	0.357022	1.00003	0.0145359	0.966984	0.250663	0.000659936	2.81702	2.00622	0.065638
ileon-680-FMT-AKK_75	13.4494	12.7476	0.763298	2.89224	0.182016	0.896043	1.31328	0.0645804	0.196298	0.0221098	2.43397	0.0260967	2.17191	0.0957511	2.37818	2.37818	2.92876	238.101	0.00309393	0.0397709	0.195245	0.0387336	0.541917	10.4883	0.000163417	237.023	37.801	0.000302014	0.698064	0.0791606	0.0181194	0.278808	0.000820833	0.170762	13.9269	1.65367	113.752	0.0137882	9428.04	1.89518	0.112239	0.347286	0.0122989	0.149345	0.303542	0.000135262	2.61634	43.3105	0.598492
ileon-686-ATB_81	57.2364	2.62025	0.364747	1.43205	0.0959626	3.03181	0.368484	0.0512508	0.311076	0.012505	2.26931	0.0176129	10.999	2.79386	1.01227	1.01227	11.3074	8.44218	0.00639416	0.0152753	0.0291771	0.0319207	0.431332	10.0252	0.000705749	45.2295	4.59144	0.00111165	0.588281	0.010934	0.00268624	0.0929052	0.000653101	0.0578403	17.501	12.4279	#N/A	0.0344152	1881.06	6.35758	0.0413868	0.616918	0.115647	2.33752	1.73377	0.000584326	0.847161	5.49805	0.318436
ileon-676-FMT-AKK-Pas_71	19.4442	8.87869	0.585748	5.51031	0.22268	0.440778	0.917771	0.072514	0.079425	0.0257272	1.72191	0.0150538	3.10848	0.181166	1.59247	1.59247	2.37142	629.022	0.00146237	0.0143974	0.117328	0.0826018	0.596018	6.12498	0.00171321	48.2145	15.2826	0.000322869	0.91666	0.14487	0.018316	0.18675	0.000971724	0.149268	10.6685	1.84792	101.58	0.0503921	6060.66	1.58376	0.16523	0.371618	0.0186778	0.58029	0.0651363	0.000138069	2.53781	3.49828	0.0675502
ileon-682-FMT_77	59.6842	3.21786	0.149865	5.72031	0.551216	1.30194	0.50591	0.0447046	1.11076	0.0250699	1.1303	0.0153638	1.52621	0.196528	1.73551	1.73551	2.43548	19.2599	0.000997405	0.00276871	0.0804079	0.161773	0.504587	19.5664	0.0228368	7.08387	3.30528	0.000213658	0.573888	0.0338866	0.0165376	0.239924	0.00155592	0.078724	22.0456	10.6129	63.9679	0.0380237	3707.91	1.06068	0.115986	0.914134	0.0265103	1.58795	1.09352	0.00122321	2.91268	4.4944	0.0881719
ileon-688-ATB_83	113.944	2.50232	0.536576	1.15317	0.141897	2.14288	0.369637	0.0663038	0.269184	0.0179676	2.31785	0.0730407	1.47581	1.64022	2.10884	2.10884	13.2273	8.34007	0.00551026	0.01316	0.0311224	0.0506712	0.573391	13.4577	0.00207145	24.4617	0.591956	0.0014856	0.511162	0.0293786	0.0185858	0.377685	0.00700444	0.274993	7.66871	18.6981	#N/A	0.0298084	249.769	14.2559	1.72437	0.727517	0.114756	11.1023	11.3572	0.00341848	0.614074	15.1462	0.487958
ileon-687-SPF_82	5.37321	6.63277	0.208458	17.5631	0.170731	0.272058	1.15657	0.054001	0.544255	0.0165104	1.40723	0.00823231	3.74359	0.878757	0.257332	0.257332	2.38607	162.698	0.00497083	0.00532774	0.447957	#N/A	0.461375	14.42	#N/A	17.0844	9.49779	0.000364405	0.636423	0.0240611	0.00287441	0.049694	0.000639386	0.015385	16.7261	#N/A	52.5502	0.00292039	8800.29	0.978575	0.0223966	0.625639	0.0221038	0.140625	0.0252475	0.000872118	2.42408	6.19685	0.162722
ileon-679-FMT-AKK_74	8.34299	2.96081	0.315288	0.995591	0.153249	1.30016	0.610922	0.0648787	0.236514	0.0227331	2.38661	0.024199	3.04566	0.0897287	8.13885	8.13885	6.64218	611.997	0.00175776	0.0326626	0.0285322	0.0530589	0.495403	15.7778	0.000360648	147.121	157.501	0.000280911	0.273651	0.0391274	0.0293653	1.14458	0.000642195	0.285008	28.5566	5.28262	113.98	0.042141	5814.82	2.22616	0.0699824	0.492593	0.0119245	0.0181044	0.12984	9.40523e-05	2.32252	107.201	1.60174
ileon-673-FMT-AKK-Pas_68	20.1861	3.44213	0.341357	1.53797	0.0844627	0.931596	0.730888	0.0717714	0.176755	0.0208476	2.28502	0.0180761	3.54431	0.402309	5.57584	5.57584	5.32346	187.753	0.00601717	0.072421	0.11743	0.0575167	0.46057	23.8636	0.000929679	61.8672	47.658	0.000588688	0.388189	0.0418686	0.0432477	1.0218	0.000998288	0.273358	20.3976	6.65179	52.8977	0.0338209	2199.51	2.22431	0.60306	0.63641	0.0168681	0.102886	0.161071	0.000277613	2.08607	34.0722	0.69773
ileon-691-ATB_86	1972.69	6.18052	1.02928	2.00183	0.13842	3.26916	0.244807	0.0692739	0.790435	0.0180696	2.46776	0.051291	2.84427	0.957194	1.22075	1.22075	7.11527	8.58966	0.00254422	0.0254292	0.0200829	0.0482275	0.490542	12.5202	0.000727571	66.2857	1.30318	0.000241541	0.696229	0.0030841	0.00517894	0.0810297	0.000720013	0.0479122	25.4789	5.95856	557.534	0.0253149	1299.96	2.44901	0.194772	0.60811	0.0480162	7.37515	3.32145	0.00060194	2.12239	6.2873	0.314019
ileon-678-FMT_73	1.04615	17.7582	0.309143	6.6146	0.572232	0.31863	1.3982	0.048005	0.377809	0.0270645	0.845987	0.0117883	3.49818	0.308477	0.514371	0.514371	0.99488	43.0584	0.00423133	0.0196433	0.0270737	0.116903	0.647566	7.34823	0.00124196	94.1284	6.49641	0.000365884	0.669249	0.0453212	0.0137403	0.152643	0.00113456	0.0612705	8.39508	1.12684	30.2773	0.079556	6771.15	0.714233	0.198411	0.358581	0.0691337	7.15924	0.946314	0.00162965	2.54005	0.847451	0.0257534
ileon-677-FMT-AKK-Pas_72	14.883	1.6644	0.224817	5.19593	0.155247	1.90885	0.951852	0.0830555	0.0754638	0.0273687	1.29225	0.0225528	4.75662	0.0512528	5.21297	5.21297	2.7448	182.242	0.00250029	0.00830453	0.138997	0.133478	0.497394	20.6737	0.0108946	12.2518	2.04037	0.000249438	0.56591	0.0762952	0.0509576	0.645641	0.000661344	0.284704	18.3101	4.84238	40.787	0.0534041	3171.42	1.76927	0.135664	0.512162	0.0200957	0.756309	1.02843	0.000689533	2.96375	13.091	0.274181
ileon-693-SPF_88	3.62428	11.6752	0.437279	4.75126	0.39682	0.288663	1.79789	0.129951	0.0677223	0.0175384	1.78891	0.0332006	1.64584	0.0468487	3.66383	3.66383	2.81969	1405.16	0.00406061	0.0190556	0.102358	0.173129	0.614036	12.9357	0.00733423	23.6056	6.23557	0.000340591	0.588795	0.0431662	0.0569097	0.88973	0.0011022	0.496969	7.37236	7.14834	36.0538	#N/A	4891.43	2.26471	0.141504	0.624871	0.0187294	4.02022	0.0899874	0.000430125	1.77502	0.717583	0.0140177
ileon-672-FMT-AKK_67	5.08392	3.00189	0.346581	1.41398	0.143115	0.990907	0.545494	0.134138	0.249308	0.018111	2.90543	0.0160509	3.66876	0.581708	1.77374	1.77374	5.66443	78.7057	0.0105572	0.0502329	0.578986	0.0553483	0.480715	20.2898	0.00161881	34.1906	27.6263	0.000532784	0.0763894	0.0399176	0.0109334	2.5456	0.00120943	0.152406	11.6382	8.61282	19.1697	0.0267198	5463.08	3.07118	0.267494	0.996688	0.016755	1.06207	0.367491	0.00048151	1.75826	5.79669	0.105899
ileon-694-ATB_89	30.4407	4.23382	0.729712	1.17604	0.106711	2.50358	0.312648	0.0994507	0.294267	0.0195476	1.39675	0.0622082	2.4562	0.809547	0.996082	0.996082	4.97822	3.39398	0.00541795	0.0248833	0.0215446	0.0375889	0.55159	13.401	0.000507611	74.0508	1.09566	0.000398185	0.551471	0.00908146	0.010116	0.262742	0.00139452	0.139221	7.15468	7.08234	#N/A	0.040765	647.583	4.10789	0.334467	0.716199	0.110947	23.0365	8.65257	0.00208085	1.41733	3.31949	0.220612
ileon-671-FMT-AKK-Pas_66	3.34995	1.80662	0.314399	0.388566	0.232107	1.81327	0.609656	0.0713717	0.112037	0.0220728	1.66621	0.0165341	8.08745	0.102269	4.37883	4.37883	3.47347	683.756	0.0055603	0.0376833	0.394387	0.132437	0.47144	21.7702	0.00915967	14.4587	10.2077	0.000280529	0.514173	0.0901992	0.0404228	0.67295	0.000436746	0.40782	10.7372	13.0332	85.9824	0.0258497	2062.9	3.05996	0.365335	1.18749	0.0308331	0.655239	0.370966	0.00092244	2.60787	9.3744	0.181749
ileon-695-SPF_90	1.60271	18.3911	0.360143	17.6777	0.609876	0.254288	1.24314	0.0607524	0.0682194	0.0243932	2.5045	0.00454217	6.35987	1.70977	0.101346	0.101346	1.40201	455.966	0.00319474	0.0985653	0.0293079	0.0781576	0.739544	4.02334	0.000691488	113.028	0.457908	0.000319781	0.729634	0.086587	0.00435753	0.0231368	0.000468646	0.0126029	8.04152	0.741976	54.0813	0.0954538	9690.59	0.451048	0.0522618	0.217954	0.032025	219.47	1.5567	0.0013862	2.33511	0.363044	0.00826055
ileon-669-FMT_64	5.41085	6.58392	0.411201	10.7583	0.354031	0.312539	1.03051	0.0566423	0.336122	0.0186346	1.34407	0.0167283	2.16934	0.2481	1.36475	1.36475	2.77871	514.867	0.00323663	0.00359929	0.385655	0.0573683	0.477551	18.1544	0.00279087	20.5557	14.4247	0.000319291	0.595989	0.0499994	0.00866491	0.117046	0.000797853	0.0733442	18.6075	3.47317	111.538	0.0316343	3855.47	1.86791	0.114147	1.18135	0.0119631	0.258717	0.301068	0.000115962	1.82143	8.52413	0.183797
[truncated: 2 more columns]

## Sheet: RatioLog2Cen
	Uridine.UMP	Xanthine.Guanine	Xanthine.HXanthine	HXanthine.Inosine	Uracil.Uridine	Urate.Xanthine	AcCarn.Carn	Glyc3P.Glycerol	Glyc3P.GPCho	Stearate.Linolenate	Fum.Suc	Pyr.Lac	aHGA.aKG	Citrate.Oaa	Pyr.Malate	Oaa.Malate	Fum.Malate	Xylose.Xylitol	Rib5P.Ribose	Ribu5P.Ribo5P	Sucrose.Raffinose	Cit.Arg	Tyr.Phe	Glu.Gln	Orn.Arg	Cit.Orn	Put.Orn	Kyn.Trp	Ser.Gly	Asn.Asp	Pyr.Ala	Pyr.Ser	aKG.Glu	Oaa.Asp	Asp.Malate	Urea.Arginine	Serine.PSerine	Carnosine.BetaAla	Val.KIV	BetaAla.Asp	HOPro.Pro	Anthr.Kyn	GABA.Glu	Spmd.Put	AcPut.Put	SAM.Met	Glu.Oxoproline	AcSpmd.Spmd	AcSpmd.Spmd_1
ileon-666-FMT_61	-2.79275	-0.240743	-0.452134	-0.185574	-0.0318552	-1.33473	-0.301583	-1.02169	0.536086	-0.113259	-0.356717	-0.965113	-0.160193	2.82253	-0.917606	-0.917606	-0.388324	-2.42669	1.20591	-0.340464	0.418757	0.443284	-0.149869	0.0120835	1.4841	-0.99504	1.81494	0.849879	0.0958796	0.638949	-0.896601	-0.870654	-0.0864921	-1.16131	0.243702	0.623746	-0.30251	0.329532	1.50752	-0.696739	-0.943694	-0.775134	-0.396458	-0.199851	-1.35599	1.01256	0.454021	-2.35284	-2.54179
ileon-667-FMT-AKK-Pas_62	-0.0938035	-0.977119	-0.574832	-0.752318	-0.667558	0.3187	0.166918	-0.0321174	-2.56973	0.277568	-0.279215	-0.178038	0.745466	-1.96057	1.26274	1.26274	-0.685675	2.52537	-1.14225	0.826396	0.603499	0.288644	-0.234356	0.418677	-0.537292	0.87171	0.886682	-0.432592	0.258755	0.935216	1.51015	0.669412	-0.961829	0.982402	0.280336	-0.811766	-0.195808	0.334737	-0.305589	-0.368406	0.524105	-0.0428863	-1.04599	-0.106035	-0.724846	-0.157783	0.697723	-0.368789	-0.56165
ileon-684-SPF_79	2.33196	-0.121291	-0.265258	0.670817	0.389315	-0.0663373	0.885189	-0.74451	2.65443	0.453164	-0.630355	-0.767721	-0.970887	-0.897398	0.189678	0.189678	-0.349884	2.821	-1.81699	-1.9164	-1.09278	-0.277789	-0.116725	0.12139	-0.32134	0.0893252	0.191474	-0.334058	-0.583676	-0.679873	-0.440605	0.67851	0.367927	-0.00730956	0.196987	-0.648738	-0.851225	0.236869	0.829565	-0.354046	-0.69013	0.141979	0.0355842	1.6523	-1.98042	1.61269	0.241027	-2.05937	-2.14379
ileon-668-FMT-AKK_63	-1.76899	2.23352	1.51004	0.377926	0.0731561	-0.366989	-0.416102	0.105329	-0.498077	-0.440538	0.697938	-0.283005	-0.346631	1.12764	-0.573849	-0.573849	-0.127006	0.37944	1.07574	0.653075	-0.133636	-0.512771	-0.0546143	-0.747889	-2.26367	1.79667	2.28102	-0.128232	0.677088	1.92701	-0.574174	-1.68038	-0.370639	-0.796821	0.222971	-1.29129	1.70455	-1.10708	1.61012	-0.542348	-1.56912	-0.88622	-1.09922	-0.1402	-2.14987	-2.22379	0.319173	-1.29304	-1.93134
ileon-690-ATB_85	3.64669	-0.0541729	1.11888	-1.16331	-0.736048	1.18544	-1.01247	0.62072	-1.54943	-0.358588	-0.391211	2.22963	-0.0909698	2.08922	0.239424	0.239424	1.31252	-4.24614	0.315802	-0.324027	-1.58365	-1.10544	0.0655399	-0.243138	-0.919592	-0.140078	-2.413	0.61063	-1.13177	-1.53693	-0.856126	1.10737	1.43474	0.491308	-0.251884	0.737632	0.748838	-0.0508616	-2.64537	1.60245	1.97641	0.19103	2.96545	5.06102	3.48072	2.13498	-0.824301	-2.45259	-0.85807
ileon-681-FMT-AKK-Pas_76	-1.52915	-0.895913	-0.615365	-0.62527	-0.403194	0.31072	0.0162359	0.21702	-2.16855	0.421923	-0.410879	-0.200692	0.333149	-1.83699	1.52396	1.52396	-0.236791	3.04942	-0.254366	1.24587	0.635345	-0.530454	-0.352551	0.925354	1.29873	-1.78341	1.05859	0.549926	0.00314158	0.850057	1.95088	1.49809	-0.587114	1.44748	0.0764799	-0.0154788	-1.04381	0.515283	-0.634643	-0.0264573	1.62729	-0.165138	-1.15352	-1.08464	-1.69839	-1.32475	0.742124	-0.163837	-0.623562
ileon-670-FMT_65	-1.19672	-1.39072	-0.950751	-0.50593	-0.71586	0.104299	-0.0656726	0.0304331	1.65464	0.262972	-0.48097	-0.62461	-0.422072	0.310388	-0.424303	-0.424303	-0.576258	-1.7036	0.716846	-0.00970377	-1.28204	0.403137	-0.0786821	-0.358932	0.654949	-0.206037	1.4802	-1.01841	0.120275	1.42243	0.113922	-0.546047	-0.0241324	-0.684544	0.260241	-0.136397	0.240196	0.710235	0.625476	-0.751269	0.812379	0.382454	-0.981203	-0.134297	-0.559618	0.0436842	0.286389	-1.43318	-1.6675
ileon-685-SPF_80	-2.12417	-0.12516	0.215106	-1.24424	0.194476	0.131925	0.995196	-0.241198	-1.11997	0.518519	-1.05157	-1.11718	0.578632	-1.26088	0.0180973	0.0180973	-0.58881	2.17937	0.265139	0.886236	-1.20994	0.450697	-0.134716	0.608812	1.42147	-0.925004	0.303387	0.183682	-0.843102	-0.282596	-0.0946717	0.957949	-0.959108	0.18255	-0.164453	-0.147405	-1.74591	0.216977	1.32534	0.0950764	-0.260201	-0.196506	0.0110731	-0.0348429	-3.32525	1.59628	0.569047	-1.6197	-1.77532
ileon-675-FMT-AKK_70	4.26226	-0.153639	0.389473	-1.26592	-0.242828	0.560268	0.262122	-0.0853391	1.28087	-0.0225543	0.196832	0.509466	-0.211281	-2.46872	1.97211	1.97211	0.967454	-0.154971	-0.48666	-0.731501	-0.175019	0.967044	-0.225774	-0.0127243	-0.313133	1.32595	2.98672	0.102826	-0.13831	-0.286472	0.87006	0.984509	0.0847256	1.15635	0.815754	1.98913	-0.0875079	-2.42221	0.94155	0.509097	0.6723	0.592641	-0.637981	-3.26171	-0.220995	-2.0108	-0.381413	3.34849	2.28226
ileon-692-ATB_87	1.37311	-0.0807348	0.255008	0.474922	-0.427758	0.776684	-0.0307453	0.127203	-1.36192	-0.379146	-1.22959	0.632758	1.23129	3.24511	-1.72542	-1.72542	0.0919452	-3.11884	0.643957	0.982208	-1.02462	-0.730667	-0.0323021	0.061857	-1.50822	0.823332	-1.16135	1.75309	-0.0105534	-1.67226	-0.656095	-0.15757	1.92193	0.401781	-2.1272	0.766748	#N/A	0.0245924	-1.92213	1.72595	2.52268	-0.306623	0.95472	1.72964	2.07836	0.940338	-0.704117	-0.0666764	0.91676
ileon-683-FMT_78	-2.36843	0.294748	-0.580083	1.75745	1.08386	-0.773983	0.114995	-1.16353	2.38515	-0.0641751	-0.904378	0.241112	-0.0567322	-1.98394	0.980086	0.980086	-0.889967	1.16349	0.631103	0.731811	1.18288	0.736017	0.298729	-1.05705	0.657543	0.124248	-0.693272	-0.690549	0.398286	1.6356	1.32726	0.207821	0.234985	0.77564	0.204447	-1.35888	-0.347051	0.910801	-0.378492	-1.14316	-0.124974	-0.662126	-0.430692	0.0331128	-0.818778	-1.65851	0.0198405	-0.55272	-0.9484
ileon-689-SPF_84	-0.0254089	-0.138971	-0.689335	-0.273936	-0.59804	-0.572392	0.882208	-0.16012	-0.434387	-0.0389341	0.715262	-0.0554707	-0.976526	0.471022	-1.28747	-1.28747	-0.141028	1.65257	-0.261276	-2.0727	-2.04022	-0.0873082	-0.108451	0.822904	0.331144	-0.372678	0.827407	-0.50587	0.250673	-0.350261	-0.742004	-0.832084	0.118555	-1.19814	-0.0893291	-0.435502	-0.280239	0.599737	0.10937	-0.472407	0.868321	0.797409	-0.866832	-0.635161	-0.661347	0.238022	0.415679	-1.05206	-0.63624
ileon-680-FMT-AKK_75	-0.0761793	1.42805	1.00895	0.0885611	-0.0686124	-0.0482025	0.788873	0.0303876	-0.124915	0.0746609	0.681334	0.401637	-0.565329	-1.77302	0.526592	0.526592	-0.240495	1.09009	-0.275117	1.07254	1.48955	-0.875752	0.108583	-0.352696	-3.34256	2.51258	2.07731	-0.410054	0.504156	0.974243	0.271839	-0.0743763	-0.27213	0.462734	0.0638583	-1.53356	0.871263	-1.219	1.48998	-0.128232	-0.801125	-0.728433	-1.10792	-3.33	-0.385199	-2.04854	0.30906	3.3801	2.55249
ileon-686-ATB_81	2.01322	-0.854404	-0.0563981	-0.925542	-0.99213	1.71034	-1.04463	-0.303136	0.53931	-0.747523	0.580276	-0.165598	1.77501	3.09381	-0.705675	-0.705675	1.70841	-3.72772	0.772195	-0.307974	-1.25282	-1.15485	-0.22069	-0.417853	-1.23197	0.122896	-0.964093	1.46996	0.257302	-1.88172	-2.48204	-1.65982	-0.601911	-1.0991	0.393429	1.37629	#N/A	0.100617	-0.835435	1.61791	-2.24045	0.100519	2.1252	0.638252	2.12874	0.0624702	-1.31778	0.402378	1.64216
ileon-676-FMT-AKK-Pas_71	0.455624	0.906241	0.626985	1.0185	0.222297	-1.07172	0.271903	0.19755	-1.43029	0.293268	0.18203	-0.392103	-0.0480793	-0.853066	-0.0519992	-0.0519992	-0.545034	2.49163	-1.35625	-0.39336	0.754811	0.216835	0.245869	-1.12871	0.0475105	0.215099	0.77078	-0.313724	0.897183	1.84615	0.287408	-0.652542	-0.0286724	0.268658	-0.320657	-1.37332	0.707983	0.65077	0.852493	-0.38722	-0.243217	-0.630737	-0.505135	-1.37188	-2.60556	-2.01891	0.265094	-0.249896	-0.59481
ileon-682-FMT_77	2.07363	-0.558007	-1.33963	1.07247	1.52994	0.49082	-0.587352	-0.500286	2.37552	0.255929	-0.425276	-0.362692	-1.07433	-0.735643	0.0721011	0.0721011	-0.506579	-2.53781	-1.90831	-2.77188	0.209675	1.18656	0.00561513	0.546892	3.78409	-2.55176	-1.43827	-0.909371	0.221566	-0.249825	0.140053	-0.291075	0.650474	-0.654376	0.726477	1.14853	0.0407908	0.244472	0.143623	-0.965578	-0.753747	0.667847	9.47617e-05	0.0804449	1.46382	1.12829	0.463853	0.111585	-0.210451
ileon-688-ATB_83	3.00654	-0.920842	0.500488	-1.23802	-0.427829	1.20971	-1.04012	0.0683815	0.330638	-0.224632	0.610811	1.88647	-1.12279	2.32544	0.353188	0.353188	1.93466	-3.74528	0.55756	-0.523011	-1.15971	-0.488172	0.19003	0.00694436	0.321447	-0.763845	-3.91948	1.8883	0.0545779	-0.455774	0.308503	0.363535	2.82098	1.15014	-0.796956	1.9656	#N/A	-0.10671	-3.74832	2.78292	3.1403	0.338423	2.11404	2.88606	4.84036	2.61098	-1.78201	1.86434	2.25791
ileon-687-SPF_82	-1.39986	0.485505	-0.86354	2.69084	-0.160953	-1.76786	0.605553	-0.227723	1.34633	-0.346653	-0.109125	-1.26286	0.220133	1.42509	-2.68156	-2.68156	-0.536145	0.540714	0.408926	-1.82758	2.68763	#N/A	-0.123549	0.106586	#N/A	-1.28169	0.084551	-0.139128	0.370783	-0.743839	-2.38435	-2.56251	-0.632532	-3.00965	0.32809	#N/A	-0.242861	-3.45819	1.39057	-1.08181	-3.12634	0.120773	-0.262161	-3.4168	-3.97288	0.640219	0.198948	0.574992	0.673569
ileon-679-FMT-AKK_74	-0.765082	-0.678114	-0.266623	-1.45	-0.316796	0.488849	-0.315244	0.0370342	0.14397	0.114769	0.652986	0.292715	-0.0775359	-1.86674	2.30156	2.30156	0.940874	2.45204	-1.09082	0.788465	-1.28507	-0.421743	-0.020885	0.236413	-2.20053	1.82456	4.13617	-0.514557	-0.846865	-0.0423625	0.968417	1.9631	-0.626206	1.20175	1.09981	0.142032	0.874151	0.392795	0.792753	0.103985	-1.48263	-0.224162	-1.15253	-6.37424	-1.61037	-2.57277	0.137201	4.68764	3.97272
ileon-673-FMT-AKK-Pas_68	0.509644	-0.460804	-0.152012	-0.822597	-1.17629	0.00793412	-0.0565821	0.1827	-0.276204	-0.0101466	0.590229	-0.12815	0.141213	0.297927	1.75593	1.75593	0.62158	0.74735	0.684526	1.93724	0.756065	-0.305358	-0.126067	0.833326	-0.83439	0.574807	2.41161	0.552831	-0.342445	0.0553296	1.52693	1.7994	0.0102373	1.14154	0.614387	0.474519	-0.233351	0.0754855	-0.609801	0.102789	1.62461	0.145398	-0.652162	-3.8676	-1.2994	-1.01123	-0.0177016	3.03398	2.77383
ileon-691-ATB_86	7.1203	0.383621	1.44028	-0.442308	-0.46362	1.81908	-1.63459	0.131602	1.88469	-0.216463	0.701226	1.37648	-0.17623	1.54843	-0.435491	-0.435491	1.04014	-3.70274	-0.557334	0.427315	-1.79169	-0.559481	-0.0351119	-0.0972273	-1.18804	0.674329	-2.781	-0.732406	0.50036	-3.70762	-1.53497	-1.85713	-0.461195	-1.37078	0.935293	0.315741	3.16443	-0.342441	-1.36852	0.241629	-0.00591094	0.0797741	0.857063	2.29595	3.06664	0.105315	0.00719836	0.595898	1.62201
ileon-678-FMT_73	-3.76055	1.90631	-0.295022	1.28203	1.58392	-1.53989	0.879266	-0.397525	0.819702	0.366378	-0.843271	-0.744875	0.122315	-0.0852167	-1.68238	-1.68238	-1.79819	-1.37712	0.176551	0.0548628	-1.36077	0.717905	0.36554	-0.866016	-0.416582	1.18026	-0.463397	-0.133283	0.44334	0.169644	-0.127285	-0.943488	0.19484	-1.01598	-0.666397	-2.08694	-1.03832	1.30954	1.01242	-1.5361	0.0207954	-0.682259	1.38293	2.25308	1.25522	1.54219	0.266367	-2.29534	-1.98601
ileon-677-FMT-AKK-Pas_72	0.0699449	-1.50911	-0.754545	0.933753	-0.298105	1.04286	0.324506	0.393366	-1.5041	0.382503	-0.232096	0.191077	0.565647	-2.67468	1.65884	1.65884	-0.334082	0.70437	-0.582466	-1.1872	0.999319	0.909195	-0.0150987	0.626312	2.71635	-1.76138	-2.13421	-0.685992	0.201369	0.921051	1.7636	1.13708	-0.583817	1.20021	0.458629	0.0164941	-0.608446	0.734523	-0.0818521	-0.227413	-0.527653	-0.167958	-0.399572	-0.989677	1.37527	0.301315	0.488932	1.65397	1.42629
ileon-693-SPF_88	-1.96795	1.30127	0.205261	0.804683	1.05581	-1.68239	1.242	1.03919	-1.66025	-0.259511	0.237105	0.74898	-0.965467	-2.8043	1.15009	1.15009	-0.295246	3.65118	0.117137	0.0110443	0.557887	1.28444	0.288834	-0.0501295	2.14545	-0.815236	-0.52252	-0.23663	0.258563	0.0993615	1.92298	1.59972	0.1531	2.00391	-0.853814	0.578386	-0.786407	#N/A	0.543275	0.128757	-0.466849	0.119	-0.501156	1.42055	-2.1393	-0.379549	-0.250655	-2.53532	-2.86352
ileon-672-FMT-AKK_67	-1.47971	-0.658236	-0.1301	-0.943868	-0.4155	0.0969795	-0.478669	1.08494	0.219975	-0.213156	0.936773	-0.299576	0.191002	0.829916	0.103528	0.103528	0.711146	-0.506943	1.49559	1.40946	3.0578	-0.3608	-0.0643062	0.599271	-0.0342589	-0.280766	1.62493	0.408879	-2.68776	-0.0135142	-0.456947	3.11629	0.287038	0.298673	-0.195145	0.847263	-1.69773	-0.264521	0.702733	0.568223	0.451812	0.792583	-0.661867	-0.499844	-0.109389	-0.216738	-0.264346	0.478686	0.0538514
ileon-694-ATB_89	1.10228	-0.162148	0.944033	-1.20969	-0.838972	1.43415	-1.28169	0.653272	0.459171	-0.103034	-0.119906	1.65487	-0.387864	1.30674	-0.728926	-0.728926	0.524847	-5.04236	0.533186	0.396004	-1.69034	-0.919029	0.134108	0.000856839	-1.7074	0.834147	-3.03125	-0.0112327	0.164082	-2.14954	-0.569058	-0.160005	0.492483	0.168126	-0.897052	0.565004	#N/A	0.344904	-2.37385	0.987827	0.774172	0.315802	2.06535	3.93913	4.44796	1.8948	-0.575315	-0.325578	1.11267
ileon-671-FMT-AKK-Pas_66	-2.08151	-1.39081	-0.270697	-2.8074	0.282116	0.968754	-0.318236	0.174643	-0.933976	0.0722466	0.134588	-0.256789	1.33139	-1.67801	1.40728	1.40728	0.0055931	2.612	0.570602	0.994752	2.50388	0.897895	-0.0924143	0.70087	2.4661	-1.52243	0.188549	-0.51652	0.0630498	1.16257	1.42947	1.19685	-1.18242	1.71868	-0.311401	1.4449	0.467485	-0.31228	-0.702308	0.562944	0.901528	1.04528	0.218021	-1.19663	-0.0958092	0.721151	0.304382	1.17218	0.833104
ileon-695-SPF_90	-3.14513	1.95683	-0.0747254	2.70023	1.67584	-1.86531	0.70968	-0.0577679	-1.6497	0.216456	0.722546	-2.12078	0.984707	2.38535	-4.0259	-4.0259	-1.30329	2.02744	-0.228862	2.38191	-1.24637	0.137048	0.557148	-1.73502	-1.26142	1.44424	-4.28991	-0.327587	0.567969	1.10361	-1.78411	-3.66539	-1.08072	-3.29742	-0.728473	-2.68978	-0.201428	1.57237	1.5296	-2.19922	-1.90387	-1.40053	0.27274	7.19115	1.97332	1.30876	0.145	-3.51832	-3.62646
ileon-669-FMT_64	-1.38979	0.47484	0.116551	1.98375	0.891203	-1.56773	0.43905	-0.158831	0.651029	-0.172042	-0.175371	-0.23994	-0.567034	-0.399457	-0.274625	-0.274625	-0.316367	2.20272	-0.210068	-2.39339	2.47158	-0.309085	-0.0738332	0.438832	0.751517	-1.01483	0.687429	-0.329801	0.276082	0.31137	-0.792438	-1.32657	-0.313096	-0.756496	0.481871	-0.462969	0.842913	-0.0209409	0.199923	-0.149144	-0.776805	1.0378	-1.14787	-2.53728	-0.397008	-2.27066	-0.21342	1.03501	0.849272
[truncated: 2 more columns]
