# Supplementary material for: Oral administration of Akkermansia muciniphila elevates systemic antiaging and anticancer metabolites
Source: Aging (Albany NY). 2021 Mar 2;13(5):6375–405. doi: 10.18632/aging.202739 (PMC7993698; doi:10.18632/aging.202739)
Supplement: Supplementary Table 10 [file aging-13-202739-s011.xlsx]

## Sheet: SampleInfos
Supplementary Table 10. Related to Supplementary Figures 15, 17. Targeted metabolomics analysis from COLON samples from mice receiving oral gavages with Akk or Akk-past.
Sid	sType	InjOrder	Grp	Color
BlM_pre	Bl	4	-	-
BlM_post	Bl	46	-	-
QC_colon_4a	QC	6	QC	#737373
QC_colon_5a	QC	7	QC	#737373
QC_colon_4b	QC	15	QC	#737373
QC_colon_5b	QC	16	QC	#737373
QC_colon_4c	QC	24	QC	#737373
QC_colon_5c	QC	25	QC	#737373
QC_colon_5e	QC	27	QC	#737373
QC_colon_4d	QC	34	QC	#737373
QC_colon_5d	QC	35	QC	#737373
QC_colon_4e	QC	45	QC	#737373
QC_colon_5f	QC	47	QC	#737373
colon-666-FMT_61	Sa	8	FMT Colon	#9E9AC8
colon-667-FMT-AKK-Pas_62	Sa	9	FMT AKK Pas Colon	#54278F
colon-684-SPF_79	Sa	10	SPF Colon	#74C476
colon-668-FMT-AKK_63	Sa	11	FMT AKK Colon	#7960AB
colon-690-ATB_85	Sa	12	ATB Colon	#FB6A4A
colon-681-FMT-AKK-Pas_76	Sa	13	FMT AKK Pas Colon	#54278F
colon-670-FMT_65	Sa	14	FMT Colon	#9E9AC8
colon-685-SPF_80	Sa	17	SPF Colon	#74C476
colon-675-FMT-AKK_70	Sa	18	FMT AKK Colon	#7960AB
colon-692-ATB_87	Sa	19	ATB Colon	#FB6A4A
colon-683-FMT_78	Sa	20	FMT Colon	#9E9AC8
colon-689-SPF_84	Sa	21	SPF Colon	#74C476
colon-680-FMT-AKK_75	Sa	22	FMT AKK Colon	#7960AB
colon-686-ATB_81	Sa	23	ATB Colon	#FB6A4A
colon-676-FMT-AKK-Pas_71	Sa	26	FMT AKK Pas Colon	#54278F
colon-682-FMT_77	Sa	28	FMT Colon	#9E9AC8
colon-688-ATB_83	Sa	29	ATB Colon	#FB6A4A
colon-687-SPF_82	Sa	30	SPF Colon	#74C476
colon-679-FMT-AKK_74	Sa	31	FMT AKK Colon	#7960AB
colon-673-FMT-AKK-Pas_68	Sa	32	FMT AKK Pas Colon	#54278F
colon-691-ATB_86	Sa	33	ATB Colon	#FB6A4A
colon-678-FMT_73	Sa	36	FMT Colon	#9E9AC8
colon-677-FMT-AKK-Pas_72	Sa	37	FMT AKK Pas Colon	#54278F
colon-693-SPF_88	Sa	38	SPF Colon	#74C476
colon-672-FMT-AKK_67	Sa	39	FMT AKK Colon	#7960AB
colon-694-ATB_89	Sa	40	ATB Colon	#FB6A4A
colon-671-FMT-AKK-Pas_66	Sa	41	FMT AKK Pas Colon	#54278F
colon-695-SPF_90	Sa	42	SPF Colon	#74C476
colon-674-FMT-AKK_69	Sa	43	FMT AKK Colon	#7960AB
colon-669-FMT_64	Sa	44	FMT Colon	#9E9AC8
St_mix_pre	St	1	-	-
St_BA1_pre	St	2	-	-
St_AA_pre	St	3	-	-
St_BA2_pre	St	5	-	-
St_AA_post	St	48	-	-
St_BA2_post	St	49	-	-
St_BA1_post	St	50	-	-

## Sheet: MetabolitesInfos
Analyte	MetName	RT	Class	MF	Mass	HMDB	KEGG	PC	Chebi	OGName	PCu	Method
2-deoxycytidine@1.43-qppos	2-deoxycytidine	1.434	Nucleosides	C9H13N3O4	227.091	HMDB00014	C00881	13711;637	chebiId:15698	2-deoxycytidine	637	qppos
2-hydroxy-3-methylbutyric acid@4.58-sf	2-hydroxy-3-methylbutyric acid	4.575	Fatty Acyls	C5H10O3	118.063	-	-	5289545	-	2-hydroxy-2-methylbutyric acid	5289545	sf
2-hydroxybutyric acid@2.49-sf	2-hydroxybutyric acid	2.487	Organic acids	C4H8O3	104.047	HMDB00008	C05984	440864;11266	chebiId:1148;chebiId:50613	2-hydroxybutyric acid	11266	sf
2-oxoglutaric acid@13.19-gc	2-oxoglutaric acid	13.185	Organic acids	C5H6O5	146.022	HMDB00208	C00026	51	chebiId:30915	2-oxoglutaric acid	51	gc
3-hydroxybutyric acid@1.66-sf	3-hydroxybutyric acid	1.656	Organic acids	C4H8O3	104.047	HMDB00357;HMDB00011	C01089	441;92135	chebiId:10983;chebiId:17066;chebiId:20067	3-hydroxybutyric acid	441	sf
3-methylhistidine@0.99-qppos	3-methylhistidine	0.992	Amino acids	C7H11N3O2	169.085	HMDB00479	C01152	64969;565965	chebiId:27596	3-methylhistidine	565965	qppos
4-hydroxymandelic acid@15.38-gc	4-hydroxymandelic acid	15.385	Unclassified	C8H8O4	168.042	HMDB00822	C11527	328	chebiId:16388	4-hydroxymandelic acid	328	gc
4-hydroxyproline@12.60-gc	4-hydroxyproline	12.604	Amino acids	C5H9NO3	131.058	HMDB00725	C01157	825;5810;5238478	chebiId:18095	4-hydroxyproline	5238478	gc
5-aminovaleric acid@13.70-gc	5-aminovaleric acid	13.697	Amino acids	C5H11NO2	117.079	HMDB03355	C00431	138;6992101	chebiId:15887	5-aminovaleric acid	138	gc
5-oxoproline@12.53-gc	5-oxoproline	12.531	Amino acids	C5H7NO3	129.043	HMDB00805;HMDB00267	C02237;C01879	439685;499;7405	chebiId:16010;chebiId:16924;chebiId:18183	5-oxoproline	499	gc
7,12-dihydroxy-3-oxocholanoic acid@7.12-ba	7,12-dihydroxy-3-oxocholanoic acid	7.119	Steroids	C24H38O5	406.272	-	-	5283956	-	Dehydrocholic acid	5283956	ba
Acetic acid@1.78-sf	Acetic acid	1.783	Organic acids	C2H4O2	60.021	HMDB00042	C00033	176;21980959	chebiId:15366	Acetic acid	176	sf
Acetylcarnitine@1.23-qppos	Acetylcarnitine	1.23	Fatty Acyls	C9H17NO4	203.116	HMDB00201	C02571	7045767;439756;1	chebiId:15960;chebiId:57589	Acetylcarnitine	1	qppos
Acetylcholine@1.07-qppos	Acetylcholine	1.069	Unclassified	C7H15NO2	145.11	HMDB00895	C01996	187	chebiId:15355	Acetylcholine	187	qppos
Adenine@16.39-gc	Adenine	16.387	Bases	C5H5N5	135.054	HMDB00034	C00147	190	chebiId:16708	Adenine	190	gc
Alanine@7.03-gc	Alanine	7.025	Amino acids	C3H7NO2	89.048	HMDB01310;HMDB00161	C00133;C00041	71080;602;5950;7311724;57383916	chebiId:15570;chebiId:16977	Alanine	57383916	gc
Allantoin@16.73-gc	Allantoin	16.731	Organic acids	C4H6N4O3	158.044	HMDB00462	C02350;C01551	204;439714	chebiId:15678	Allantoin	204	gc
Alpha-muricholic acid@5.96-ba	Alpha-muricholic acid	5.961	Steroids	C24H40O5	408.288	HMDB00506	C17647	5283852;3083761	chebiId:81243	Alpha-muricholic acid	3083761	ba
Alpha-tocopherol@29.54-gc	Alpha-tocopherol	29.539	Prenols	C29H50O2	430.381	HMDB01893	C02477	14985;2116	chebiId:18145	Alpha-tocopherol	2116	gc
Arabinose@14.34-gc	Arabinose	14.337	Carbohydrates	C5H10O5	150.053	HMDB00646	C00216;C00259	66308;6902;439195	chebiId:17108;chebiId:46994	Arabinose	439195	gc
Arabitol@15.04-gc	Arabitol	15.038	Carbohydrates	C5H12O5	152.068	HMDB01851;HMDB00568	C00532;C01904	439255;94154	chebiId:18403;chebiId:18333	Arabitol	439255	gc
Arachidic acid@23.82-qpneg	Arachidic acid	23.82	Fatty Acyls	C20H40O2	312.303	HMDB02212	C06425	10467	chebiId:28822	Arachidic acid	10467	qpneg
Arachidonic acid@20.30-qpneg	Arachidonic acid	20.295	Fatty Acyls	C20H32O2	304.24	HMDB01043	C00219	444899;231	chebiId:15843	Arachidonic acid	231	qpneg
Arginine@0.98-qppos	Arginine	0.977	Amino acids	C6H14N4O2	174.112	HMDB03416;HMDB00517	C00792;C00062	71070;6322;59119146;232;5246487	chebiId:15816;chebiId:16467	Arginine	232	qppos
Asparagine@14.30-gc	Asparagine	14.298	Amino acids	C4H8N2O3	132.053	HMDB00168	C00152	236;6267;5247114	chebiId:17196	Asparagine	236	gc
Aspartic acid@12.54-gc	Aspartic acid	12.535	Amino acids	C4H7NO4	133.038	HMDB06483;HMDB00191	C00402;C00049	83887;5960;424;23443619;57397078	chebiId:17364;chebiId:17053	Aspartic acid	23443619	gc
Behenic acid@25.11-qpneg	Behenic acid	25.107	Fatty Acyls	C22H44O2	340.334	HMDB00944	C08281	8215	chebiId:23858;chebiId:28941	Behenic acid	8215	qpneg
Benzoic acid@8.93-gc	Benzoic acid	8.934	Unclassified	C7H6O2	122.037	HMDB01870	C00180	243;20144841	chebiId:30746	Benzoic acid	20144841	gc
Beta-alanine@11.33-gc	Beta-alanine	11.33	Amino acids	C3H7NO2	89.048	HMDB00056	C00099	239;4755801	chebiId:16958	Beta-alanine	239	gc
Beta-muricholic acid@6.26-ba	Beta-muricholic acid	6.261	Steroids	C24H40O5	408.288	HMDB00415	C17726	5283853;3083762	chebiId:81298	Beta-muricholic acid	3083762	ba
Butanoic acid@5.27-sf	Butanoic acid	5.267	Fatty Acyls	C4H8O2	88.052	HMDB00039	C00246	264	chebiId:30772	Butanoic acid	264	sf
Cadaverine@4.61-pa	Cadaverine	4.613	Unclassified	C5H14N2	102.116	HMDB02322	C01672	273	chebiId:18127	Cadaverine	273	pa
Caproic acid@12.07-sf	Caproic acid	12.069	Fatty Acyls	C6H12O2	116.084	HMDB00535	C01585	8892	chebiId:30776	Caproic acid	8892	sf
Carnitine@1.02-qppos	Carnitine	1.016	Organic acids	C7H15NO3	161.105	HMDB00062	C00318;C00487;C15025	10917;288;85;2724480	chebiId:16347;chebiId:3424;chebiId:11060	Carnitine	288	qppos
Carnitine C10:0@12.39-qppos	Carnitine C10:0	12.387	Fatty Acyls	C17H33NO4	315.241	HMDB00651	-	10245190	-	Carnitine C10:0	10245190	qppos
Carnitine C10:1@11.60-qppos	Carnitine C10:1	11.603	Fatty Acyls	C17H31NO4	313.225	HMDB13205	-	53481651	-	Carnitine C10:1	53481651	qppos
Carnitine C12:0@13.80-qppos	Carnitine C12:0	13.799	Fatty Acyls	C19H37NO4	343.272	HMDB02250	-	168381	-	Carnitine C12:0	168381	qppos
Carnitine C12:1@10.69-qppos	Carnitine C12:1	10.685	Fatty Acyls	C19H35NO4	341.257	HMDB13326	-	53481671	-	Carnitine C12:1	53481671	qppos
Carnitine C14:0@15.86-qppos	Carnitine C14:0	15.857	Fatty Acyls	C21H41NO4	371.304	HMDB05066	-	53477791	-	Carnitine C14:0	53477791	qppos
Carnitine C14:1@14.94-qppos	Carnitine C14:1	14.945	Fatty Acyls	C21H39NO4	369.288	HMDB13329;HMDB02014	-	22833575;53481677	-	Carnitine C14:1	22833575	qppos
Carnitine C14:1(OH)@13.51-qppos	Carnitine C14:1(OH)	13.506	Organic acids	C21H39NO5	385.283	HMDB13330	-	53481679	-	Carnitine C14:1(OH)	53481679	qppos
Carnitine C14:2@14.08-qppos	Carnitine C14:2	14.077	Fatty Acyls	C21H37NO4	367.272	HMDB13331	-	53481681	-	Carnitine C14:2	53481681	qppos
Carnitine C16:0@17.59-qppos	Carnitine C16:0	17.588	Fatty Acyls	C23H45NO4	399.335	HMDB00222	C02990	461;11953816	chebiId:17490	Carnitine C16:0	461	qppos
Carnitine C16:1@16.41-qppos	Carnitine C16:1	16.414	Fatty Acyls	C23H43NO4	397.319	HMDB13207;HMDB06317	-	53477817;53481653	-	Carnitine C16:1	53477817	qppos
Carnitine C18:0@19.49-qppos	Carnitine C18:0	19.493	Fatty Acyls	C25H49NO4	427.366	HMDB00848	-	6426855	-	Carnitine C18:0	6426855	qppos
Carnitine C18:1@18.07-qppos	Carnitine C18:1	18.067	Fatty Acyls	C25H47NO4	425.351	HMDB05065	-	53477789	-	Carnitine C18:1	53477789	qppos
Carnitine C18:2@17.04-qppos	Carnitine C18:2	17.037	Fatty Acyls	C25H45NO4	423.335	HMDB06469;HMDB06461	-	6450015;53477834	-	Carnitine C18:2	53477834	qppos
Carnitine C3:0@1.59-qppos	Carnitine C3:0	1.588	Fatty Acyls	C10H19NO4	217.131	HMDB00824	C03017	107738	chebiId:28867	Carnitine C3:0	107738	qppos
Carnitine C4:0@2.66-qppos	Carnitine C4:0	2.659	Fatty Acyls	C11H21NO4	231.147	HMDB00736	-	10177002;439829	-	Carnitine C4:0	10177002	qppos
Carnitine C4:0(OH)@1.42-qppos	Carnitine C4:0(OH)	1.418	Fatty Acyls	C11H21NO5	247.142	HMDB13127	-	53481617	-	Carnitine C4:0(OH)	53481617	qppos
Carnitine C5:0@5.35-qppos	Carnitine C5:0	5.346	Fatty Acyls	C12H23NO4	245.163	HMDB00688	-	6426851	-	Carnitine C5:0	6426851	qppos
Carnitine C6:0@7.59-qppos	Carnitine C6:0	7.589	Fatty Acyls	C13H25NO4	259.178	HMDB00705	-	6426853;3246938	-	Carnitine C6:0	6426853	qppos
Carnitine C8:1@9.28-qppos	Carnitine C8:1	9.279	Fatty Acyls	C15H27NO4	285.194	HMDB13324	-	53481667	-	Carnitine C8:1	53481667	qppos
Carnosine@1.00-qppos	Carnosine	0.998	Peptides	C9H14N4O3	226.107	HMDB00033	C00386	439224;9369;5249653	chebiId:15727	Carnosine	5249653	qppos
Chenodeoxycholic acid@10.28-ba	Chenodeoxycholic acid	10.278	Steroids	C24H40O4	392.293	HMDB00518	C02528	10133	chebiId:16755	Chenodeoxycholic acid	10133	ba
Cholesterol@29.66-gc	Cholesterol	29.655	Steroids	C27H46O	386.355	HMDB00067	C00187	6432564;5997	chebiId:16113	Cholesterol	5997	gc
Cholic acid@9.14-ba	Cholic acid	9.145	Steroids	C24H40O5	408.288	HMDB00619	C00695;C01558	221493;303;439520	chebiId:16359;chebiId:22868;chebiId:3098	Cholic acid	303	ba
Choline phosphate@1.01-qppos	Choline phosphate	1.014	Unclassified	C5H14NO4P	183.066	HMDB01565	C00588	135437;1014	chebiId:18132	Choline phosphate	135437	qppos
Citric acid;Isocitric acid@15.97-gc	Citric acid;Isocitric acid	15.97	Organic acids	C6H8O7	192.027	HMDB00094;HMDB00193	C00158;C00311	311;19782904;88113319;1198	chebiId:30769;chebiId:30887	Citric acid;Isocitric acid	19782904;1198	gc
Citrulline@15.94-gc	Citrulline	15.939	Amino acids	C6H13N3O3	175.096	HMDB00904	C00327	833;9750;25244873	chebiId:16349	Citrulline	25244873	gc
Creatine@12.97-gc	Creatine	12.972	Amino acids	C4H9N3O2	131.069	HMDB00064	C00300	586	chebiId:16919	Creatine	586	gc
Creatinine@1.01-qppos	Creatinine	1.015	Amino acids	C4H7N3O	113.059	HMDB00562	C00791	588	chebiId:16737	Creatinine	588	qppos
Cytosine@1.17-qppos	Cytosine	1.174	Bases	C4H5N3O	111.043	HMDB00630	C00380	597	chebiId:16040	Cytosine	597	qppos
Deoxycholic acid@10.48-ba	Deoxycholic acid	10.48	Steroids	C24H40O4	392.293	HMDB00626	C11171;C04483	222528;2987;23668196	chebiId:9177;chebiId:28834	Deoxycholic acid	2987	ba
Dimethylarginine@1.02-qppos	Dimethylarginine	1.016	Amino acids	C8H18N4O2	202.143	HMDB01539;HMDB03334	C03626	123831	chebiId:17929	Dimethylarginine	123831	qppos
Dimethylglycine@1.00-qppos	Dimethylglycine	0.995	Amino acids	C4H9NO2	103.063	HMDB00092	C01026	673	chebiId:17724	Dimethylglycine	673	qppos
Docosadienoic acid@23.01-qpneg	Docosadienoic acid	23.01	Fatty Acyls	C22H40O2	336.303	-	C16533	5282807;5312554	chebiId:75117	Docosadienoic acid	5282807	qpneg
Docosahexaenoic acid@20.25-qpneg	Docosahexaenoic acid	20.255	Fatty Acyls	C22H32O2	328.24	HMDB02183	C06429	445580	chebiId:28125	Docosahexaenoic acid	445580	qpneg
Docosapentaenoic acid@20.68-qpneg	Docosapentaenoic acid	20.677	Fatty Acyls	C22H34O2	330.256	HMDB01976;HMDB06528	C16513	6441454;5497182;3035421	chebiId:53488	Docosapentaenoic acid	3035421	qpneg
Docosatetraenoic acid@21.39-qpneg	Docosatetraenoic acid	21.386	-	-	-	-	-	-	-	-	-	qpneg
Docosatrienoic acid@22.24-qpneg	Docosatrienoic acid	22.242	Fatty Acyls	C22H38O2	334.287	HMDB02823	C16534	5312556	chebiId:80549	Docosatrienoic acid	5312556	qpneg
Docosenoic acid@23.97-qpneg	Docosenoic acid	23.967	Fatty Acyls	C22H42O2	338.318	HMDB02068	C08316	5281116	chebiId:28792	Docosenoic acid	5281116	qpneg
Dodecenedioic acid@12.57-qpneg	Dodecenedioic acid	12.574	Fatty Acyls	C12H20O4	228.136	HMDB00933	C16308	5283028	chebiId:545687	Traumatic acid	5283028	qpneg
Eicosadienoic acid@21.69-qpneg	Eicosadienoic acid	21.692	Fatty Acyls	C20H36O2	308.272	HMDB05060	C16525	6439848	chebiId:73731	Eicosadienoic acid	6439848	qpneg
Eicosapentaenoic acid@19.58-qpneg	Eicosapentaenoic acid	19.577	Fatty Acyls	C20H30O2	302.225	HMDB01999	C06428	446284	chebiId:28364	Eicosapentaenoic acid	446284	qpneg
Eicosatrienoic acid@20.87-qpneg	Eicosatrienoic acid	20.872	Fatty Acyls	C20H34O2	306.256	HMDB60039	C16522	5312529	chebiId:53460	Dihomo-linolenic acid	5312529	qpneg
Eicosenoic acid@22.65-qpneg	Eicosenoic acid	22.645	Fatty Acyls	C20H38O2	310.287	HMDB02231	C16526	5282768	chebiId:32425	Eicosenoic acid	5282768	qpneg
Erythritol@12.46-gc	Erythritol	12.456	Carbohydrates	C4H10O4	122.058	HMDB02994	C00503	222285;8998	chebiId:17113;chebiId:48299	Erythritol	8998	gc
FAD@7.51-qppos	FAD	7.506	Nucleotides	C27H33N9O15P2	785.157	HMDB01248	C00016	643975;703	chebiId:16238	FAD	703	qppos
Ferulic acid@19.51-gc	Ferulic acid	19.514	Flavonoids	C10H10O4	194.058	HMDB00537;HMDB00954	C01494	445858;709	chebiId:17620	Ferulic acid	445858	gc
FMN@7.72-qpneg	FMN	7.722	Nucleotides	C17H21N4O9P	456.105	HMDB01520	C00061	710;643976	chebiId:17621	FMN	710	qpneg
Fructose@16.66-gc	Fructose	16.664	Carbohydrates	C6H12O6	180.063	HMDB00660	C00095;C02336	5984;439163;439709	chebiId:15824;chebiId:37721;chebiId:28645	Fructose	439163	gc
Fumaric acid@10.23-gc	Fumaric acid	10.235	Organic acids	C4H4O4	116.011	HMDB00134	C00122	444972	chebiId:18012	Fumaric acid	444972	gc
GABA@12.61-gc	GABA	12.614	Amino acids	C4H9NO2	103.063	HMDB00112	C00334	119;6992099	chebiId:16865	GABA	119	gc
Galactitol;Sorbitol;Mannitol@17.57-gc	Galactitol;Sorbitol;Mannitol	17.565	Carbohydrates	C6H14O6	182.079	HMDB00107;HMDB00765;HMDB00247	C01697;C00392;C00794	11850;6251;5780	chebiId:16813;chebiId:16899;chebiId:17924	Galactitol;Mannitol;Sorbitol	11850;6251;5780	gc
Galactose;Glucose;Mannose@16.98-gc	Galactose;Glucose;Mannose	16.984	Carbohydrates	C6H12O6	180.063	HMDB00143;HMDB33704;HMDB00122;HMDB03345;HMDB00516;HMDB00169	C00124;C01582;C00984;C01825;C00031;C00267;C00221;C00159	439357;6036;3037556;12003287;79025;5793;206;64689;161658;18950	chebiId:4139;chebiId:28061;chebiId:28260;chebiId:42905;chebiId:4167;chebiId:17925;chebiId:15903;chebiId:4208	Galactose;Glucose;Mannose	12003287;206;161658	gc
Gamma-glutamylleucine@3.03-qppos	Gamma-glutamylleucine	3.031	Peptides	C11H20N2O5	260.137	HMDB11171	-	151023	-	Gamma-glutamylleucine	151023	qppos
Gamma-glutamyllysine@1.01-qppos	Gamma-glutamyllysine	1.01	-	-	-	-	-	-	-	-	-	qppos
Gamma-glutamylthreonine@1.04-qppos	Gamma-glutamylthreonine	1.038	Peptides	C9H16N2O6	248.101	HMDB28829	-	6998031	-	Gamma-glutamylthreonine	6998031	qppos
Gamma-glutamyltyrosine@2.76-qppos	Gamma-glutamyltyrosine	2.756	Peptides	C14H18N2O6	310.116	HMDB11741	-	94340	-	Gamma-glutamyltyrosine	94340	qppos
Glucuronic acid;Galacturonic acid@1.02-qpneg	Glucuronic acid;Galacturonic acid	1.024	Carbohydrates	C6H10O7	194.043	HMDB02545;HMDB03402;HMDB00127	C08348;C00333;C00191	84740;152867;19770757;441476;439215;94715;444791;610	chebiId:33830;chebiId:47954;chebiId:12952;chebiId:4153;chebiId:4178;chebiId:47952	Galacturonic acid;Glucuronic acid	152867;610	qpneg
Glutamic acid@13.70-gc	Glutamic acid	13.695	Amino acids	C5H9NO4	147.053	HMDB03339;HMDB00148	C00025;C00302;C00217	611;33032;57397101;23327	chebiId:16015;chebiId:15966;chebiId:18327	Glutamic acid	57397101	gc
Glutamine@15.40-gc	Glutamine	15.405	Amino acids	C5H10N2O3	146.069	HMDB00641;HMDB03423	C00064;C00819	5961;145815;25244553;738	chebiId:18050;chebiId:17061	Glutamine	25244553	gc
Glutarylcarnitine@1.43-qppos	Glutarylcarnitine	1.432	Fatty Acyls	C12H21NO6	275.137	HMDB13130	-	53481622	-	Glutarylcarnitine	53481622	qppos
Glutathione@1.37-qppos	Glutathione	1.373	Peptides	C10H17N3O6S	307.084	HMDB00125	C00051	124886;745;60072620	chebiId:16856	Glutathione	60072620	qppos
Glyceric acid@10.12-gc	Glyceric acid	10.125	Carbohydrates	C3H6O4	106.027	HMDB00139	C00258	752;439194	chebiId:32398	Glyceric acid	752	gc
Glycerol@9.36-gc	Glycerol	9.358	Carbohydrates	C3H8O3	92.047	HMDB00131	C00116	753	chebiId:17754	Glycerol	753	gc
Glycerol-3-phosphate@15.38-gc	Glycerol-3-phosphate	15.385	Lipids	C3H9O6P	172.014	HMDB00126	C00093	754;439162	chebiId:15978	Glycerol-3-phosphate	754	gc
Glycerophosphorylcholine@1.02-qppos	Glycerophosphorylcholine	1.017	Lipids	C8H20NO6P	257.103	HMDB00086	C00670	657272;439285;11234	chebiId:16870	Glycerophosphorylcholine	11234	qppos
Glycochenodeoxycholic acid@9.27-ba	Glycochenodeoxycholic acid	9.266	Steroids	C26H43NO5	449.314	HMDB00637;HMDB06898	C05466;C05462	22833540;12544	chebiId:36274	Glycochenodeoxycholic acid	12544	ba
Glycocholic acid@5.86-ba	Glycocholic acid	5.86	Steroids	C26H43NO6	465.309	HMDB00138	C01921	10140;23617285;755	chebiId:17687	Glycocholic acid	755	ba
Glycohyodeoxycholic acid@5.55-ba	Glycohyodeoxycholic acid	5.551	-	-	-	-	-	-	-	-	-	ba
Glycolic acid@6.36-gc	Glycolic acid	6.362	Organic acids	C2H4O3	76.016	HMDB00115	C00160	757;3698251	chebiId:17497	Glycolic acid	3698251	gc
Glycylglycine@1.00-qppos	Glycylglycine	0.998	Peptides	C4H8N2O3	132.053	HMDB11733	C02037	11163;1548897	chebiId:17201	Glycylglycine	11163	qppos
Guanine@20.28-gc	Guanine	20.28	Bases	C5H5N5O	151.049	HMDB00132	C00242	764	chebiId:16235	Guanine	764	gc
Guanosine@2.30-qppos	Guanosine	2.295	Nucleosides	C10H13N5O5	283.092	HMDB00133	C00387	6802;765	chebiId:16750	Guanosine	765	qppos
Heptadecatrienoic acid@18.89-qpneg	Heptadecatrienoic acid	18.889	Fatty Acyls	C17H28O2	264.209	-	C16344	16061034	chebiId:76235	Heptadecatrienoic acid	16061034	qpneg
Heptadecenoic acid@20.57-qpneg	Heptadecenoic acid	20.567	Fatty Acyls	C17H32O2	268.24	HMDB31046;HMDB60038	C16536	5312435;5312440	chebiId:80550	Heptadecenoic acid	5312435	qpneg
Heptanoic acid@13.89-sf	Heptanoic acid	13.89	Fatty Acyls	C7H14O2	130.099	HMDB00666	C17714	8094	chebiId:45571	Heptanoic acid	8094	sf
Hexacosanoic acid@27.45-qpneg	Hexacosanoic acid	27.455	Fatty Acyls	C26H52O2	396.397	HMDB02356	-	10469	-	Hexacosanoic acid	10469	qpneg
Hexadecadienoic acid@18.95-qpneg	Hexadecadienoic acid	18.954	Fatty Acyls	C16H28O2	252.209	HMDB00477	-	13932172	-	Hexadecadienoic acid	13932172	qpneg
Hexadecanedioic acid@16.59-qpneg	Hexadecanedioic acid	16.59	Fatty Acyls	C16H30O4	286.214	HMDB00672	C19615	10459	chebiId:73722	Hexadecanedioic acid	10459	qpneg
Hexanoylglycine*@7.06-qpneg	Hexanoylglycine*	7.061	-	-	-	-	-	-	-	-	-	qpneg
Hippuric acid@15.98-gc	Hippuric acid	15.978	Unclassified	C9H9NO3	179.058	HMDB00714	C01586	464	chebiId:18089	Hippuric acid	464	gc
Histidine@17.06-gc	Histidine	17.061	Amino acids	C6H9N3O2	155.069	HMDB00177	C00135	6274;773;3651426	-	Histidine	3651426	gc
Homoserine@1.01-qppos	Homoserine	1.01	Amino acids	C4H9NO3	119.058	HMDB00719	C00263	12647;1502076;779;25245858;193314	chebiId:15699	Homoserine	193314	qppos
Hyocholic acid@8.16-ba	Hyocholic acid	8.163	Steroids	C24H40O5	408.288	HMDB00760	C17649	92805	chebiId:81244	Hyocholate;Hyocholic acid;Iocholic acid;gamma-Muricholate;alpha-Hyocholic acid;3alpha,6alpha,7alpha-Trihydroxy-5beta-cholan-24-oic acid;6alpha-Hydroxychenodeoxycholic acid	92805	ba
Hyodeoxycholic acid@9.27-ba	Hyodeoxycholic acid	9.271	Steroids	C24H40O4	392.293	HMDB00733	-	9963687;227033	-	Hyodeoxycholic acid	227033	ba
Hypotaurine@13.47-gc	Hypotaurine	13.466	Organic acids	C2H7NO2S	109.02	HMDB00965	C00519	107812;25244088	chebiId:16668	Hypotaurine	107812	gc
Hypoxanthine@15.75-gc	Hypoxanthine	15.753	Bases	C5H4N4O	136.039	HMDB00157	C00262	790	chebiId:17368	Hypoxanthine	790	gc
Indole-3-acetamide@7.74-qpneg	Indole-3-acetamide	7.74	Indoles	C10H10N2O	174.079	HMDB29739	C02693	397	chebiId:16031	Indole-3-acetamide	397	qpneg
Indole-3-acrylic acid@10.88-qpneg	Indole-3-acrylic acid	10.879	Indoles	C11H9NO2	187.063	HMDB00734	-	15030923	-	Indole-3-acrylic acid	15030923	qpneg
Indole-3-lactic acid@8.34-qpneg	Indole-3-lactic acid	8.342	Indoles	C11H11NO3	205.074	HMDB00671	C02043	92904	chebiId:17282;chebiId:24813	Indole-3-lactic acid	92904	qpneg
Indole-3-propionic acid@10.93-qppos	Indole-3-propionic acid	10.926	Indoles	C11H11NO2	189.079	HMDB02302	-	3744	-	Indole-3-propionic acid	3744	qppos
Inosine@25.08-gc	Inosine	25.079	Nucleosides	C10H12N4O5	268.081	HMDB00195	C00294	6021	chebiId:17596	Inosine	6021	gc
Inositol@19.93-gc	Inositol	19.926	Unclassified	C6H12O6	180.063	HMDB06088;HMDB00211	C06153;C00137;C19891	892	chebiId:10642;chebiId:17268	Inositol	892	gc
Isobutyric acid@4.88-sf	Isobutyric acid	4.876	Organic acids	C4H8O2	88.052	HMDB01873	C02632	6590	chebiId:16135	Isobutyric acid	6590	sf
Isocaproic acid@11.91-sf	Isocaproic acid	11.915	Fatty Acyls	C6H12O2	116.084	HMDB00689	-	12587	-	Isocaproic acid	12587	sf
Isoleucine@9.60-gc	Isoleucine	9.603	Amino acids	C6H13NO2	131.095	HMDB00172	C00407	791;6306	chebiId:17191	Isoleucine	791	gc
Isovaleric acid@9.01-sf	Isovaleric acid	9.009	Fatty Acyls	C5H10O2	102.068	HMDB00718	C08262	10430	chebiId:28484	Isovaleric acid	10430	sf
Ketoisovaleric acid@7.47-gc	Ketoisovaleric acid	7.469	Organic acids	C5H8O3	116.047	HMDB00019	C00141	49	chebiId:11851;chebiId:16530	Ketoisovaleric acid	49	gc
Kynurenine@21.46-gc	Kynurenine	21.459	Unclassified	C10H12N2O3	208.085	HMDB00684	C00328	846;161166;25245862	chebiId:16946	Kynurenine	25245862	gc
Lactic acid@6.49-gc	Lactic acid	6.489	Organic acids	C3H6O3	90.032	HMDB01311;HMDB00190	C00256;C00186	61503;107689;19789253;612	chebiId:341;chebiId:42111;chebiId:422	Lactic acid	19789253	gc
Lauric acid@13.94-gc	Lauric acid	13.942	Fatty Acyls	C12H24O2	200.178	HMDB00638	C02679	3893	chebiId:30805	Lauric acid	3893	gc
Leucine@9.30-gc	Leucine	9.304	Amino acids	C6H13NO2	131.095	HMDB00687	C00123	6106;857;5255803	chebiId:15603	Leucine	5255803	gc
Leucylproline@1.42-qppos	Leucylproline	1.422	Peptides	C11H20N2O3	228.147	HMDB11175	-	44369311	-	Leucylproline	44369311	qppos
Linoleic acid@20.34-qpneg	Linoleic acid	20.341	Fatty Acyls	C18H32O2	280.24	HMDB00673	C01595	5280450;3931	chebiId:17351	Linoleic acid	3931	qpneg
Linolenic acid@19.57-qpneg	Linolenic acid	19.575	Fatty Acyls	C18H30O2	278.225	HMDB01388	C06427	5280934;860	chebiId:27432	Linolenic acid	5280934	qpneg
Lithocholic acid@11.11-ba	Lithocholic acid	11.112	Steroids	C24H40O3	376.298	HMDB00761	C03990	11740284;9903	chebiId:16325	Lithocholic acid	11740284	ba
Lysine@17.05-gc	Lysine	17.048	Amino acids	C6H14N2O2	146.106	HMDB03405;HMDB00182	C00739;C00047	57449;5962;866;5248709	chebiId:16855;chebiId:18019	Lysine	5248709	gc
Malic acid@12.14-gc	Malic acid	12.145	Organic acids	C4H6O5	134.022	HMDB00156;HMDB00744	C00149;C00711	525;20130941;222656	chebiId:30797;chebiId:6650	Malic acid	20130941	gc
Maltose;Trehalose@27.71-gc	Maltose;Trehalose	27.71	Carbohydrates	C12H22O11	342.116	HMDB00163;HMDB00975	C00208;C01083	439341;6255;439186;294;7427;1143	chebiId:17306;chebiId:16551	Maltose;Trehalose	294;1143	gc
Margaric acid@21.69-qpneg	Margaric acid	21.693	Fatty Acyls	C17H34O2	270.256	HMDB02259	-	10465	-	Margaric acid	10465	qpneg
Methionine@12.49-gc	Methionine	12.487	Amino acids	C5H11NO2S	149.051	HMDB00696	C00073	6137;876;5255805	chebiId:16643	Methionine	5255805	gc
Methyl-indole-3-acetic-acid@10.93-qpneg	Methyl-indole-3-acetic-acid	10.928	-	-	-	-	-	-	-	-	-	qpneg
Methylmalonic acid@1.54-qpneg	Methylmalonic acid	1.542	Organic acids	C4H6O4	118.027	HMDB00202	C02170	487	chebiId:30860	Methylmalonic acid	487	qpneg
Murideoxycholic acid@7.23-ba	Murideoxycholic acid	7.232	Steroids	C24H40O4	392.293	HMDB00811	C15515	5283821	CHEBI:52030	Murocholic acid	5283821	ba
Myristic acid@19.38-qpneg	Myristic acid	19.384	Fatty Acyls	C14H28O2	228.209	HMDB00806	C06424	11005	chebiId:28875;chebiId:30807	Myristic acid	11005	qpneg
Myristoleic acid@18.31-qpneg	Myristoleic acid	18.306	Fatty Acyls	C14H26O2	226.193	HMDB02000	C08322	5281119	chebiId:27781	Myristoleic acid	5281119	qpneg
N-acetylglutamine@1.44-qppos	N-acetylglutamine	1.438	Amino acids	C7H12N2O4	188.08	HMDB06029	-	182230	chebiId:17008	N-acetylglutamine	182230	qppos
N-acetylputrescine@3.33-pa	N-acetylputrescine	3.333	Organic acids	C6H14N2O	130.111	HMDB02064	C02714	122356	chebiId:17768	N-acetylputrescine	122356	pa
N-glycolylneuraminic acid@1.10-qpneg	N-glycolylneuraminic acid	1.1	Carbohydrates	C11H19NO10	325.101	HMDB00833	C03410	4603312;440001	chebiId:29025	N-glycolylneuraminic acid	4603312	qpneg
N1-acetylspermidine@5.22-pa	N1-acetylspermidine	5.22	Amino acids	C9H21N3O	187.168	HMDB01276	C00612	496	chebiId:17927	N-acetylspermine	496	pa
N1-acetylspermine@6.84-pa	N1-acetylspermine	6.836	Amino acids	C12H28N4O	244.226	HMDB01186	C02567	916	chebiId:17312	N-acetylspermine	916	pa
N1,N12-diacetylspermine@5.80-pa	N1,N12-diacetylspermine	5.8	Amino acids	C14H30N4O2	286.237	HMDB02172;HMDB41876	C03413	132679;132680	chebiId:28101	N1,N12-diacetylspermine	132680	pa
N1,N8-diacetylspermidine@4.39-pa	N1,N8-diacetylspermidine	4.387	Amino acids	C11H23N3O2	229.179	HMDB41947	-	389613	-	N1,N8-diacetylspermidine	389613	pa
N6-acetyllysine;N2-acetyllysine@1.13-qppos	N6-acetyllysine;N2-acetyllysine	1.131	Amino acids	C8H16N2O3	188.116	HMDB00446;HMDB00206	C12989;C02727	92907;265949;92832	chebiId:35704;chebiId:17752	N2-acetyllysine;N6-acetyllysine	92907;265949	qppos
N8-acetylspermidine@5.41-pa	N8-acetylspermidine	5.411	Amino acids	C9H21N3O	187.168	HMDB02189	C01029	123689	chebiId:27911	N-acetylspermidine	123689	pa
NAAG@1.88-qppos	NAAG	1.883	Peptides	C11H16N2O8	304.091	HMDB01067	C12270	5255;188803	chebiId:73688	NAAG	5255	qppos
Niacinamide@2.39-qppos	Niacinamide	2.39	Unclassified	C6H6N2O	122.048	HMDB01406	C00153	936	chebiId:17154	Niacinamide	936	qppos
Nicotinic acid@9.56-gc	Nicotinic acid	9.56	Unclassified	C6H5NO2	123.032	HMDB01488	C00253	938;117629482	chebiId:15940	Nicotinic acid	117629482	gc
Nonadecanoic acid@23.14-qpneg	Nonadecanoic acid	23.138	Fatty Acyls	C19H38O2	298.287	HMDB00772	C16535	12591	chebiId:39246	Nonadecanoic acid	12591	qpneg
Nonadecenoic acid@21.98-qpneg	Nonadecenoic acid	21.978	Fatty Acyls	C19H36O2	296.272	HMDB13622	-	5312513	chebiId:37527	Nonadecenoic acid	5312513	qpneg
O-phosphoethanolamine@15.57-gc	O-phosphoethanolamine	15.569	Organic acids	C2H8NO4P	141.019	HMDB00224	C00346	1015;5232324	chebiId:17553	O-phosphoethanolamine	1015	gc
Oleic acid;Elaidic acid;Vaccenic acid@21.28-qpneg	Oleic acid;Elaidic acid;Vaccenic acid	21.278	Fatty Acyls	C18H34O2	282.256	HMDB00573;HMDB00207;HMDB03231	C01712;C00712;C08367	637517;445639;5282761;5281127	chebiId:27997;chebiId:16196;chebiId:28727	Oleic acid;Elaidic acid;Vaccenic acid	637517;445639;5281127	qpneg
Omega-muricholic acid@5.85-ba	Omega-muricholic acid	5.851	Steroids	C24H40O5	408.288	HMDB00364	C17727	5283851	chebiId:81299	omega-muricholic acid	5283851	ba
Ornithine@2.12-pa	Ornithine	2.12	Amino acids	C5H12N2O2	132.09	HMDB03374;HMDB00214	C00077;C00515	6262;389;71082	chebiId:15729;chebiId:16176	Ornithine	389	pa
Palmitic acid@20.94-qpneg	Palmitic acid	20.941	Fatty Acyls	C16H32O2	256.24	HMDB00220	C00249	985	chebiId:15756	Palmitic acid	985	qpneg
Palmitoleic acid@19.82-qpneg	Palmitoleic acid	19.819	Fatty Acyls	C16H30O2	254.225	HMDB03229	C08362	445638;4668	chebiId:28716	Palmitoleic acid	445638	qpneg
Pantothenic acid@18.06-gc	Pantothenic acid	18.057	Amino acids	C9H17NO5	219.111	HMDB00210	C00864	6613;988	chebiId:29032;chebiId:46905;chebiId:7916	Pantothenic acid	988	gc
PCae(12:0)@15.39-qppos	PCae(12:0)	15.388	-	-	-	-	-	-	-	-	-	qppos
PCae(14:0)@15.59-qppos	PCae(14:0)	15.585	Lipids	C22H46NO7P	467.301	HMDB10379	-	460604;24779490	-	PCae(14:0)	24779490	qppos
PCae(15:0)@16.39-qppos	PCae(15:0)	16.39	Lipids	C23H48NO7P	481.317	HMDB10381	-	24779458	-	PCae(15:0)	24779458	qppos
PCae(16:0)@17.22-qppos	PCae(16:0)	17.218	Lipids	C24H50NO7P	495.332	HMDB10382	-	460602;9827122;15061532;10097314;86554	-	PCae(16:0)	86554	qppos
PCae(16:1)@16.12-qppos	PCae(16:1)	16.119	Lipids	C24H48NO7P	493.317	HMDB10383	-	24779461;24779462;24779460	-	PCae(16:1)	24779462	qppos
PCae(17:0)@18.10-qppos	PCae(17:0)	18.101	Lipids	C25H52NO7P	509.348	HMDB12108	-	24779463;24779464	-	PCae(17:0)	24779464	qppos
PCae(18:0)@19.03-qppos	PCae(18:0)	19.026	Lipids	C26H54NO7P	523.364	HMDB11128;HMDB10384	-	497299;24779491;18684067;86556;10436817;10208382	-	PCae(18:0)	10208382	qppos
PCae(18:1)@17.70-qppos	PCae(18:1)	17.696	Lipids	C26H52NO7P	521.348	HMDB10385;HMDB02815	-	16081932;53480465;24779493;6449974;24779492;10279683;24779465;24779466;6030826;15120177;24779494	-	PCae(18:1)	10279683	qppos
PCae(18:2)@16.74-qppos	PCae(18:2)	16.741	Lipids	C26H50NO7P	519.332	HMDB10386	-	11005824;24779467;11988421	-	PCae(18:2)	11988421	qppos
PCae(18:3)@16.01-qppos	PCae(18:3)	16.008	Lipids	C26H48NO7P	517.317	HMDB10387;HMDB10388	-	52924045;24779469	-	PCae(18:3)	24779469	qppos
PCae(18:4)@17.38-qppos	PCae(18:4)	17.385	Lipids	C26H46NO7P	515.301	HMDB10389	-	52924047	-	PCae(18:4)	52924047	qppos
PCae(20:1)@19.44-qppos	PCae(20:1)	19.444	Lipids	C28H56NO7P	549.379	HMDB10391	-	52924051	-	PCae(20:1)	52924051	qppos
PCae(20:2)@18.32-qppos	PCae(20:2)	18.316	Lipids	C28H54NO7P	547.364	HMDB10392	-	52924053	-	PCae(20:2)	52924053	qppos
PCae(22:6)@16.84-qppos	PCae(22:6)	16.836	Lipids	C30H50NO7P	567.332	HMDB10404	-	10415542	-	PCae(22:6)	10415542	qppos
PCee(16:0)@18.13-qppos	PCee(16:0)	18.126	Lipids	C24H52NO6P	481.353	-	-	-	-	PCee(16:0)	-	qppos
Pentadecanoic acid@19.95-qpneg	Pentadecanoic acid	19.951	Fatty Acyls	C15H30O2	242.225	HMDB00826	C16537	13849	chebiId:42504	Pentadecanoic acid	13849	qpneg
Pentadecenoic acid@19.29-qpneg	Pentadecenoic acid	19.295	Fatty Acyls	C15H28O2	240.209	HMDB29765	-	6365140	-	Pentadecenoic acid	6365140	qpneg
Phenylalanine@13.78-gc	Phenylalanine	13.776	Amino acids	C9H11NO2	165.079	HMDB00159	C00079	6140;994;57397115	chebiId:17295	Phenylalanine	57397115	gc
Phosphoric acid@9.37-gc	Phosphoric acid	9.37	Unclassified	H3O4P	97.977	HMDB01429;HMDB02142	C00009	1004	chebiId:18367;chebiId:26078	Phosphoric acid	1004	gc
Phosphoserine@0.98-qppos	Phosphoserine	0.977	Amino acids	C3H8NO6P	185.009	HMDB00272;HMDB01721	C01005	68841;106	chebiId:15811	Phosphoserine	106	qppos
Proline@9.64-gc	Proline	9.641	Amino acids	C5H9NO2	115.063	HMDB03411;HMDB00162	C00763;C00148	8988;145742;25246272;614	chebiId:16313;chebiId:17203	Proline	25246272	gc
Proline betaine@1.27-qppos	Proline betaine	1.268	Amino acids	C7H13NO2	143.095	HMDB04827	C10172	115244	chebiId:35280	Proline betaine	115244	qppos
Propionic acid@2.87-sf	Propionic acid	2.871	Organic acids	C3H6O2	74.037	HMDB00237	C00163	1032	chebiId:30768	Propionic acid	1032	sf
Putrescine@4.53-pa	Putrescine	4.533	Unclassified	C4H12N2	88.1	HMDB01414	C00134	1045	chebiId:17148	Putrescine	1045	pa
Pyruvic acid;Oxaloacetic acid@6.36-gc	Pyruvic acid;Oxaloacetic acid	6.362	Organic acids	C4H4O5;C3H4O3	110.011	HMDB00223;HMDB00243	C00036;C00022	970;1060	chebiId:30744;chebiId:32816	Oxaloacetic acid;Pyruvic acid	970;1060	gc
Raffinose@31.36-gc	Raffinose	31.365	Carbohydrates	C18H32O16	504.169	HMDB03213	C00492	10542;219993;439242	chebiId:16634	Raffinose	219993	gc
Ribitol@15.03-gc	Ribitol	15.032	Carbohydrates	C5H12O5	152.068	HMDB00508	C00474	827	chebiId:15963	Ribitol	827	gc
Riboflavin@5.94-qppos	Riboflavin	5.944	Unclassified	C17H20N4O6	376.138	HMDB00244	C00255	493570;1072	chebiId:17015	Riboflavin	1072	qppos
Ribose;Ribulose@14.50-gc	Ribose;Ribulose	14.503	Carbohydrates	C5H10O5	150.053	HMDB00283;HMDB00621;HMDB03371	C00121;C00309;C00508	5779;993;79021;439204;439203	chebiId:47013;chebiId:17173;chebiId:16880	Ribose;Ribulose	993;79021	gc
S-adenosylmethionine@4.07-pa	S-adenosylmethionine	4.07	Nucleosides	C15H22N6O5S	398.137	HMDB01185	C00019	34756;34755;5136	chebiId:15414;chebiId:67040	S-adenosylmethionine	5136	pa
Serine@10.51-gc	Serine	10.509	Amino acids	C3H7NO3	105.043	HMDB00187;HMDB03406	C00065;C00740	5951;617;6857552;71077	chebiId:17115	Serine	617	gc
Shikimic acid@15.39-gc	Shikimic acid	15.394	Unclassified	C7H10O5	174.053	HMDB03070	C00493	8742;1094	chebiId:16119	Shikimic acid	1094	gc
Spermidine@6.61-pa	Spermidine	6.612	Unclassified	C7H19N3	145.158	HMDB01257	C00315	1102	chebiId:16610	Spermidine	1102	pa
Spermine@7.45-pa	Spermine	7.451	Unclassified	C10H26N4	202.216	HMDB01256	C00750	1103	chebiId:15746	Spermine	1103	pa
Stearic acid@22.43-qpneg	Stearic acid	22.431	Fatty Acyls	C18H36O2	284.272	HMDB00827	C01530	5281	chebiId:25629;chebiId:28842	Stearic acid	5281	qpneg
Stearidonic acid@18.89-qpneg	Stearidonic acid	18.89	Fatty Acyls	C18H28O2	276.209	HMDB06547	C16300	5312508	chebiId:32389	Stearidonic acid	5312508	qpneg
Succinic acid@9.82-gc	Succinic acid	9.825	Organic acids	C4H6O4	118.027	HMDB00254	C00042	1110;21952380	chebiId:15741	Succinic acid	1110	gc
Succinyladenosine@5.70-qppos	Succinyladenosine	5.7	Nucleosides	C14H17N5O8	383.108	HMDB00912	-	20849086	-	Succinyladenosine	20849086	qppos
Sucrose@27.03-gc	Sucrose	27.028	Carbohydrates	C12H22O11	342.116	HMDB00258	C00089	5988;1115	chebiId:17992	Sucrose	1115	gc
Taurine@1.52-qpneg	Taurine	1.522	Organic acids	C2H7NO3S	125.015	HMDB00251	C00245	1123;4068592	chebiId:15891	Taurine	1123	qpneg
Tauro-alpha-muricholic acid;Tauro-beta-muricholic acid;Tauro-omega-muricholic acid@2.32-ba	Tauro-alpha-muricholic acid;Tauro-beta-muricholic acid;Tauro-omega-muricholic acid	2.32	Steroids	C26H45NO7S	515.292	HMDB00932	-	101657566;168408	chebiId:133057	TAURO Î±-MURICHOLIC ACID SODIUM SALT;Tauro-beta-muricholic acid	101657566;168408	ba
Taurochenodeoxycholic acid@6.92-ba	Taurochenodeoxycholic acid	6.92	Steroids	C26H45NO6S	499.297	HMDB00951	C05465	387316	chebiId:16525;chebiId:9407	Taurochenodeoxycholic acid	387316	ba
Taurocholic acid@4.46-ba	Taurocholic acid	4.459	Steroids	C26H45NO7S	515.292	HMDB00036	C05122	440567;5247;46783527	chebiId:28865	Taurocholic acid	5247	ba
Taurodeoxycholic acid@8.05-ba	Taurodeoxycholic acid	8.046	Steroids	C26H45NO6S	499.297	HMDB00896	C05463	2733768;440687;92042745	chebiId:36261;chebiId:9410	Taurodeoxycholic acid	2733768	ba
Taurohyodeoxycholic acid@4.18-ba	Taurohyodeoxycholic acid	4.18	Steroids	C26H45NO6S	499.297	-	-	119046	-	Taurohyodeoxycholic acid	119046	ba
Tauroursodeoxycholic acid@4.02-ba	Tauroursodeoxycholic acid	4.017	Steroids	C26H45NO6S	499.297	HMDB00874	-	12443252	-	Tauroursodeoxycholic acid	12443252	ba
Tetracosenoic acid@25.17-qpneg	Tetracosenoic acid	25.174	Fatty Acyls	C24H46O2	366.35	HMDB02368	C08323	5281120	chebiId:44247	Tetracosenoic acid	5281120	qpneg
Tetradecadienoic acid@17.59-qpneg	Tetradecadienoic acid	17.585	Fatty Acyls	C14H24O2	224.178	HMDB00560	-	5312409	-	Tetradecadienoic acid	5312409	qpneg
Tetradecanedioic acid@14.99-qpneg	Tetradecanedioic acid	14.987	Fatty Acyls	C14H26O4	258.183	HMDB00872	-	13185	-	Tetradecanedioic acid	13185	qpneg
Threonic acid@12.95-gc	Threonic acid	12.952	Carbohydrates	C4H8O5	136.037	HMDB00943	C01620	151152;439535;5460407	chebiId:15908;chebiId:49060	Threonic acid	439535	gc
Threonine@10.87-gc	Threonine	10.872	Amino acids	C4H9NO3	119.058	HMDB00167	C00188	6288;205;15341575	chebiId:16857	Threonine	15341575	gc
Trimethyl-lysine@0.98-qppos	Trimethyl-lysine	0.975	Amino acids	C9H20N2O2	188.152	HMDB01325	C03793	440120	chebiId:17311	Trimethyl-lysine	440120	qppos
Tryptophan@21.89-gc	Tryptophan	21.895	Indoles	C11H12N2O2	204.09	HMDB00929;HMDB30396	C00078;C00806	6305;1148;9060;4099458	chebiId:16828;chebiId:27897	Tryptophan	1148	gc
Tyrosine@17.28-gc	Tyrosine	17.278	Amino acids	C9H11NO3	181.074	HMDB00158	C00082	6057;1153;4300518	chebiId:17895	Tyrosine	1153	gc
UMP@1.38-qpneg	UMP	1.382	Nucleotides	C9H13N2O9P	324.036	HMDB00288	C00105	6030;1172	chebiId:16695	UMP	1172	qpneg
Undecanoic acid@16.81-qpneg	Undecanoic acid	16.807	-	-	-	-	-	-	-	-	-	qpneg
Uracil@10.20-gc	Uracil	10.197	Bases	C4H4N2O2	112.027	HMDB00300	C00106	1174	chebiId:17568	Uracil	1174	gc
Urea@8.84-gc	Urea	8.84	Organic acids	CH4N2O	60.032	HMDB00294	C00086	1176	chebiId:16199	Urea	1176	gc
Uric acid@20.03-gc	Uric acid	20.026	Bases	C5H4N4O3	168.028	HMDB00289	C00366	1175	chebiId:17775	Uric acid	1175	gc
Ursodeoxycholic acid@8.88-ba	Ursodeoxycholic acid	8.885	Steroids	C24H40O4	392.293	HMDB00946	C07880	31401	chebiId:9907	Ursodeoxycholic acid	31401	ba
Valeric acid@9.59-sf	Valeric acid	9.591	Fatty Acyls	C5H10O2	102.068	HMDB00892	C00803	7991	chebiId:17418	Valeric acid	7991	sf
Valine@8.55-gc	Valine	8.55	Amino acids	C5H11NO2	117.079	HMDB00883	C00183	6287;1182;5237032	chebiId:16414	Valine	1182	gc
Xanthine@18.51-gc	Xanthine	18.513	Bases	C5H4N4O2	152.033	HMDB00292	C00385	1188	chebiId:17712;chebiId:48517	Xanthine	1188	gc
Xylitol@14.81-gc	Xylitol	14.808	Carbohydrates	C5H12O5	152.068	HMDB02917	C00379	6912	chebiId:17151	Xylitol	6912	gc
Xylose@14.27-gc	Xylose	14.27	Carbohydrates	C5H10O5	150.053	HMDB00098	C00181	135191;6027	chebiId:15936;chebiId:53455	Xylose	135191	gc

## Sheet: Area
Sid	2-deoxycytidine@1.43-qppos	2-hydroxy-3-methylbutyric acid@4.58-sf	2-hydroxybutyric acid@2.49-sf	2-oxoglutaric acid@13.19-gc	3-hydroxybutyric acid@1.66-sf	3-methylhistidine@0.99-qppos	4-hydroxymandelic acid@15.38-gc	4-hydroxyproline@12.60-gc	5-aminovaleric acid@13.70-gc	5-oxoproline@12.53-gc	7,12-dihydroxy-3-oxocholanoic acid@7.12-ba	Acetic acid@1.78-sf	Acetylcarnitine@1.23-qppos	Acetylcholine@1.07-qppos	Adenine@16.39-gc	Alanine@7.03-gc	Allantoin@16.73-gc	Alpha-muricholic acid@5.96-ba	Alpha-tocopherol@29.54-gc	Arabinose@14.34-gc	Arabitol@15.04-gc	Arachidic acid@23.82-qpneg	Arachidonic acid@20.30-qpneg	Arginine@0.98-qppos	Asparagine@14.30-gc	Aspartic acid@12.54-gc	Behenic acid@25.11-qpneg	Benzoic acid@8.93-gc	Beta-alanine@11.33-gc	Beta-muricholic acid@6.26-ba	Butanoic acid@5.27-sf	Cadaverine@4.61-pa	Caproic acid@12.07-sf	Carnitine@1.02-qppos	Carnitine C10:0@12.39-qppos	Carnitine C10:1@11.60-qppos	Carnitine C12:0@13.80-qppos	Carnitine C12:1@10.69-qppos	Carnitine C14:0@15.86-qppos	Carnitine C14:1@14.94-qppos	Carnitine C14:1(OH)@13.51-qppos	Carnitine C14:2@14.08-qppos	Carnitine C16:0@17.59-qppos	Carnitine C16:1@16.41-qppos	Carnitine C18:0@19.49-qppos	Carnitine C18:1@18.07-qppos	Carnitine C18:2@17.04-qppos	Carnitine C3:0@1.59-qppos	Carnitine C4:0@2.66-qppos
BlM_pre	NA	174	134	412	464	131194.812	26	5635	2549	321260	242	15622	43834.589	NA	214	435022	37	18247	402	9143	287	672466.216	383511.719	1152970.005	5900	1258	62145.757	5007529	94597259	1517	2426	317959	4796	172610.981	2986.664	NA	NA	3950498.319	181868.196	NA	NA	NA	NA	NA	NA	NA	2445.576	NA	NA
BlM_post	NA	58	77	764	350	66316.426	33292	1187043	6224	11930932	272	19283	22659.712	79687.225	182192	911164	1375	2347	70	36534	4093	736715.721	799802.19	1125628.116	6614	487720	66770.653	7498928	110272980	3314	4556	63976	3791	162396.321	2724.948	NA	NA	4003632.455	132277.703	NA	NA	NA	NA	NA	NA	NA	3829.067	NA	NA
QC_colon_4a	23256868.934	15071	9743	NA	6947	11951675.324	NA	NA	NA	NA	NA	1125716	31099028.217	69138585.555	NA	NA	NA	NA	NA	NA	NA	4337451.746	88150865.85	69962278.621	NA	NA	2086116.564	NA	NA	NA	2297698	22650485	17299	47223390.159	331157.369	267961.685	569754.606	2463689.372	845084.712	1299823.11	1510711.935	805374.425	1178434.188	676738.268	776237.8	1093475.397	849048.475	8409001.846	7360060.048
QC_colon_5a	NA	NA	NA	5069279	NA	NA	384126	35035114	1455837	103257743	NA	NA	NA	NA	3825897	302616186	1412248	NA	37635	65629748	362595	NA	NA	NA	506627	37141094	NA	32225717	132081124	NA	NA	NA	NA	NA	NA	NA	NA	NA	NA	NA	NA	NA	NA	NA	NA	NA	NA	NA	NA
QC_colon_4b	24300366.904	14759	9767	NA	8122	13102175.625	NA	NA	NA	NA	NA	1141571	30924539.854	72125413.457	NA	NA	NA	NA	NA	NA	NA	4300922.403	89637090.102	72224366.917	NA	NA	1740793.545	NA	NA	NA	2560673	23634050	19871	46103913.704	356971.849	300732.101	558693.389	2886432.396	907839.572	1325530.286	1673902.987	798426.041	1401479.966	648912.708	759978.662	1070018.761	789600.929	8018581.996	7093485.691
QC_colon_5b	NA	NA	NA	5425329	NA	NA	523958	40784081	1754064	124654287	16996	NA	NA	NA	5633616	320641839	1319991	3172631	38357	75307878	389650	NA	NA	NA	990805	41359989	NA	33262289	136879456	8735883	NA	NA	NA	NA	NA	NA	NA	NA	NA	NA	NA	NA	NA	NA	NA	NA	NA	NA	NA
QC_colon_4c	22364015.492	14828	9833	NA	8205	12015455.446	NA	NA	NA	NA	NA	1151196	29278325.729	68299115.601	NA	NA	NA	NA	NA	NA	NA	4333068.126	87962253.787	67964367.556	NA	NA	1699275.682	NA	NA	NA	2384371	23538849	22042	45938232.995	331161.09	273524.755	1015225.762	2605052.031	865388.042	1229699.347	1515006.345	733315.674	1273458.366	576555.737	752702.644	1067159.505	776903.225	7452865.514	7188198.384
QC_colon_5c	NA	NA	NA	4516993	NA	NA	508415	46002463	1443806	130125454	18319	NA	NA	NA	5628396	348649275	2093379	3189833	32289	71889500	704352	NA	NA	NA	1188097	42307279	NA	33025054	128097959	9020486	NA	NA	NA	NA	NA	NA	NA	NA	NA	NA	NA	NA	NA	NA	NA	NA	NA	NA	NA
QC_colon_5e	NA	NA	NA	3788277	NA	NA	653723	45847764	1680964	160814527	17760	NA	NA	NA	6981061	300700885	2246820	3042047	43705	83581169	443221	NA	NA	NA	1243105	44798150	NA	38171856	149574315	8583697	NA	NA	NA	NA	NA	NA	NA	NA	NA	NA	NA	NA	NA	NA	NA	NA	NA	NA	NA
QC_colon_4d	22794228.424	14897	9832	NA	7435	12732586.029	NA	NA	NA	NA	NA	1170838	30160631.086	67997918.747	NA	NA	NA	NA	NA	NA	NA	4438919.468	97040021.983	72023998.409	NA	NA	1880658.206	NA	NA	NA	2375004	24979170	23468	47470159.05	325688.85	306643.986	943170.012	2729106.663	876120.975	1188120.921	1593571.422	801121.465	1254562.292	576676.237	737061.194	988893.486	794909.637	7806872.375	6939790.717
QC_colon_5d	NA	NA	NA	254912	NA	NA	515479	10548682	2603148	120455044	18459	NA	NA	NA	3491248	485818285	5685517	3826949	22712	319188830	1305785	NA	NA	NA	9602764	73898328	NA	43748301	112169473	9168837	NA	NA	NA	NA	NA	NA	NA	NA	NA	NA	NA	NA	NA	NA	NA	NA	NA	NA	NA
QC_colon_4e	23586855.848	13869	9618	NA	7705	12018273.183	NA	NA	NA	NA	NA	1168622	30055419.067	63896974.086	NA	NA	NA	NA	NA	NA	NA	4685670.796	85702424.296	68568320.915	NA	NA	2070175.996	NA	NA	NA	2598471	24887626	26087	43203746.687	352400.309	262517.662	962230.469	2668419.571	773469.834	1097092.494	1477161.744	718585.286	1202860.193	546954.129	679349.411	991352.865	792128.347	7545598.921	6716331.134
QC_colon_5f	NA	NA	NA	NA	NA	NA	NA	NA	NA	NA	20588	NA	NA	NA	NA	NA	NA	3298086	NA	NA	NA	NA	NA	NA	NA	NA	NA	NA	NA	9918869	NA	NA	NA	NA	NA	NA	NA	NA	NA	NA	NA	NA	NA	NA	NA	NA	NA	NA	NA
colon-666-FMT_61	12618987.431	14137	2163	1540121	4303	12366490.496	500997	23432252	2037042	166948392	7095	1198395	24877563.309	121517636.317	4396624	429275533	31714	2894909	32595	62247650	211734	2850125.495	56281103.631	16633832.191	2531587	95342902	1121917.883	32804503	146777295	2213307	3154932	22438098	24730	38452830.035	2333.037	2502.16	9295.791	2444176.657	118619.489	10485.649	30215.207	NA	296158.258	139174.992	301685.9	503352.974	251193.872	2500885.915	922934.755
colon-667-FMT-AKK-Pas_62	29938126.9	41355	40389	142820	8419	8995386.191	197747	6326176	347913	30009128	32217	1598890	46955628.831	89611558.346	4532959	198303826	24142	2875603	28050	82684838	93984	3196440.183	78378209.112	60105547.3	471454	13814108	1344037.908	19385923	72255086	15397377	2236955	29338284	14964	43062468.469	192153.147	61809.124	316502.105	2562615.927	738915.053	729495.151	281535.248	353136.087	1246482.544	599082.445	742835.814	991299.632	948282.702	5169974.356	18190240.355
colon-684-SPF_79	15054731.013	1815	4680	253521	1678	8621568.42	207321	16455228	466292	36950681	9217	1337528	20534884.781	NA	9695898	169334975	19812	6330325	44779	44422702	326427	3765738.843	160611542.671	20021233.793	249858	17826158	2042391.852	29124644	120825585	9830236	2750296	18514578	10252	19129216.892	6867.634	NA	44668.178	2737194.418	410465.16	217233.021	92743.008	32406.138	869199.925	209690.92	661981.781	985150.863	656001.284	5677962.437	1562729.401
colon-668-FMT-AKK_63	NA	4061	1533	18398350	10168	36363802.465	882588	17716881	2449260	254516376	130908	861330	31963628.635	60274809.648	1577097	458636302	43268	3293500	24785	120060990	470079	4278909.698	101294538.628	291800403.667	1189057	53401181	2563175.216	32486065	212915135	14228547	1932687	15143121	10383	125181009.768	688489.379	752388.102	2117217.785	2434622.396	835267.785	1925431.651	5165372.178	688458.877	1116232.025	920663.442	1058992.091	968657.187	576635.85	4859855.053	13926139.526
colon-690-ATB_85	31078401.59	1785	3522	13733206	8109	6331662.148	163281	124205737	2268216	94345651	1302	321109	12583619.921	3485351.737	2116813	171735319	9726102	415065	16171	30826788	763027	1790486.272	10960195.373	76863949.648	538788	19367731	715226.842	25408956	106821012	3819662	87687	10751591	7407	25651616.464	305005.289	296168.061	1232439.529	2759171.8	687625.716	1535934.575	671528.842	2066482.483	360138.657	382915.522	78224.52	361876.245	707475.686	5815028.999	446551.399
colon-681-FMT-AKK-Pas_76	31052080.966	69009	21549	340728	6947	8876603.315	454698	7956580	746893	52065511	51882	1340138	54384056.98	95587510.421	6433536	300427159	112842	3043092	35609	57722081	309474	1462015.846	54057981.751	51179936.203	402948	31598381	608769.657	28466199	117959084	19029579	1449395	28353283	21868	71920715.784	121240.866	6379.379	83466.906	2823599.403	593850.596	305020.189	246382.216	152323.297	1260235.079	314693.523	623212.207	747558.543	365926.264	6211169.147	16941513.098
colon-670-FMT_65	9072533.072	9288	5681	161284	3512	4544758.032	167474	5870047	540663	44467236	5086	1123289	29573003.478	68256538.194	6274521	178999149	31340	1800678	22173	48832597	201983	4231122.494	71377734.952	9660143.351	393316	30522934	2339294.008	29975653	112676999	3792906	1724573	22454835	13289	33476931.216	28458.69	3226.877	167256.91	3140642.546	722547.793	416798.01	214330.312	89931.918	909389.888	378558.71	536315.064	977134.476	714935.846	3587075.176	6517400.227
colon-685-SPF_80	21737217.404	271	1378	3527874	2117	17861985.14	832160	47128180	1647191	214554667	21959	1512797	27259423.856	158660224.7	6974333	334604691	17615	7489116	42340	44337066	758354	2724514.375	107584709.282	29671660.272	916593	25936082	1132654.524	34704237	127219277	6629748	4568689	1997508	18223	30430348.59	NA	4857.272	4291.828	2899471.233	109402.474	64166.101	41408.906	NA	112880.932	21034.926	208961.518	229707.879	129014.702	7016924.929	164914.813
colon-675-FMT-AKK_70	15206096.97	6557	16458	3384193	4338	9860387.58	474731	5910053	988363	97673339	20927	921720	29977692.697	13356800.608	1015925	317231080	53906	2347521	27374	62458248	157660	3694403.215	46773871.807	114835578.245	731759	48238985	1985704.059	32404794	140901214	11325376	1454235	31435988	12736	83488151.408	879450.315	658851.532	1644218.654	3006858.184	734253.276	1872407.375	4619992.465	847814.735	788497.676	457593.008	665855.239	546677.547	406193.262	5454999.275	9831310.649
colon-692-ATB_87	25336107.303	1169	2869	6520738	4768	5505290.441	152469	94287069	2438683	78423218	1337	293680	10517693.366	1778787.985	1661402	136932889	9205320	255461	13571	34574040	649522	2493022.14	12253517.662	63782775.64	487789	15479856	753725.605	25083130	112022211	2573725	10085	8865865	5423	18455193.966	281066.516	380384.717	1074321.507	2705793.971	630364.189	1356044.133	496650.04	1870044.681	371670.298	328384.896	54706.03	293784.978	719589.586	7036704.641	470553.862
colon-683-FMT_78	23424273.054	39742	39448	41086	4243	7711235.572	68479	14219450	235844	24965036	47285	1800692	18930610.562	61795824.746	3822132	161217761	8570	2026446	16202	38557033	150192	3605269.483	86406550.197	26075779.708	140989	18072271	1734191.524	21712606	73913249	6054474	2871947	28633815	14944	28826978.081	38374.948	6065.268	92015.491	2782726.596	814361.83	361009.966	407389.995	88507.049	1063549.977	511092.492	752045.142	1020030.686	982449.701	2691652.012	8070717.724
colon-689-SPF_84	NA	1520	1705	2756477	6038	17843418.409	791164	10013710	1522513	380455895	4990	970545	31192413.406	171208170.286	3720927	41649182	13097	3040755	52943	59098854	706788	6282503.348	162098941.089	38158678.333	570856	14713704	2355350.469	23486443	85790997	2817875	5085346	2610862	22362	38144229.126	7224.764	3136.364	29493.686	2548157.436	623744.926	487236.626	NA	227350.838	1083597.423	296071.213	601541.941	1172137.692	525822.28	8578462.024	628609.988
colon-680-FMT-AKK_75	14987795.81	6008	6159	1134145	5142	11810679.946	524793	7633084	463159	63782637	21956	871585	33462247.548	19748207.432	930494	281859789	41816	3364851	42716	98238314	184381	7010860.182	126585187.226	59343527.621	562019	15892724	3078708.234	33279951	119608852	18989823	880024	40653889	14365	80475116.087	1181636.636	809284.065	4204312.973	2579130.976	1649826.837	3926103.001	9578023.92	1630488.182	2323729.153	1382777.403	1863396.13	1440491.575	1173627.192	6090214.511	12562005.333
colon-686-ATB_81	38103387.488	2514	5060	6499218	26556	10469145.157	400609	145780020	3208782	130483982	8845	500426	38523793.376	12007310.535	4131123	134353949	9788519	685209	19517	47227763	1192463	3132504.662	40644997.065	137439649.102	1064231	34228041	1708972.408	18181859	83251949	3999340	588795	13380424	9304	47119575.879	742250.675	861211.681	2308368.182	2626594.547	1432672.188	3217750.203	1575031.334	3009934.44	1357232.822	1027760.31	546228.472	823110.167	1236374.599	35362397.933	6010236.03
colon-676-FMT-AKK-Pas_71	27334309.313	32510	10934	77446	6030	4717324.361	181601	4691717	338663	36147133	50295	1855271	13098460.997	61970911.735	4725699	69644236	14732	4290550	25709	60636880	183942	1364610.606	32503014.088	44017295.154	223931	10776637	423474.984	34507979	113644009	19471633	3175488	14058375	23081	22834465.416	4188.977	NA	51448.37	2621480.784	453591.026	180672.876	368023.821	NA	487778.384	256613.802	252327.641	411457.097	421696.966	2235672.168	935338.674
colon-682-FMT_77	28101825.615	16784	2375	2897448	7060	21416014.508	978826	62701613	2563425	292932224	6989	1638214	37831298.382	141388872.717	7793801	443734043	40417	3915334	40819	76396850	543154	3747884.286	41521788.367	25240483.92	2021701	91300725	2179962.051	33075847	207618122	731931	3845942	34585263	36254	57630722.821	7199.69	2493.565	10973.934	2728274.117	121138.529	15632.206	22545.13	NA	298707.697	101026.255	449072.892	508978.753	233842.188	4760178.719	6561592.704
colon-688-ATB_83	38288205.881	1665	2982	12162035	7088	9289371.398	307192	130951267	3392636	101844027	3647	223965	30331882.088	4111184.088	2710067	176531729	15466167	334128	23222	28674482	1035623	4735735.691	48992188.382	95672336.66	699995	14365911	1907321.372	15919413	106356113	2700339	17053	12695487	7553	45686242.55	411303.304	516382.676	1814012.404	2704099.789	1601073.219	2964066.752	819159.612	2601784.537	1720924.433	1181134.783	389516.352	896463.613	1419826.789	29079156.881	2635075.638
colon-687-SPF_82	9437929.44	12821	2600	1116887	7985	9023322.055	773703	34744974	2226099	240283999	6866	1188944	24134502.177	64282923.643	5323102	361875056	40712	4463214	19687	34390811	157210	3340593.737	99666275.588	41422708.251	1193865	126416619	1528104.694	32046273	113649395	4433993	5261354	2160545	17996	31468063.901	9117.273	3394.536	62626.612	2489066.508	493723.783	181940.367	199452.166	33900.546	680143.314	249342.911	412742.818	799169.394	465589.266	4716661.742	7830428.255
colon-679-FMT-AKK_74	25196716.923	5363	5651	1790980	5619	19084488.495	503788	13497548	1021214	103732155	15690	1005253	35632168.235	57668799.642	1135920	367108012	93786	2759555	29166	72693962	272740	4542535.288	197648022.132	216203100.619	731655	22035556	2101089.244	26393759	134735305	13908192	1496301	50240369	14290	100996530.141	962310.905	1019260.728	3007416.752	2529158.314	1437214.136	2966577.995	7213532.93	1544176.455	2069387.146	1130153.414	2096554.249	1171929.83	1310625.658	4643791.996	11534437.034
colon-673-FMT-AKK-Pas_68	14582362.833	37055	22917	5732130	4759	16276580.203	545767	14244928	1660699	162817408	35517	715003	22836857.683	46207306.947	1878860	283280809	48755	2742361	28783	69956635	97434	5585017.406	74125634.971	79938560.522	1799896	55158490	2534342.34	32309150	151190905	11579194	1544704	36579248	18873	75563515.906	207907.717	206535.123	1000638.904	2707707.312	391779.38	640383.818	2136699.821	155786.534	245068.548	225417.514	309361.268	179016.328	160964.727	3561845.422	9183477.876
colon-691-ATB_86	31298429.931	1554	3059	7963766	7618	7522078.651	216178	89399931	2745273	108162631	2270	195665	14596238.619	2014826.543	2085931	118287680	9802224	410439	23147	21655420	2010909	3240308.745	38231504.638	85372823.92	441662	13118461	1583842.177	31855529	113072634	3306609	5891	6665031	8351	27663692.393	527139.987	637071.068	1847514.853	2600874.706	1140911.979	2870204.39	1036669.834	3736109.197	1061028.116	988070.136	224939.838	742505.887	1704155.389	13284634.474	1227273.444
colon-678-FMT_73	33273478.607	25733	3465	3338234	12418	21540112.206	707374	47660798	2625508	236174346	4838	1523112	22338689.926	128627367.236	4397584	257231242	24428	3182455	31524	70879889	357385	4733417.724	135245762.189	24273443.438	988831	40643798	2843806.443	23977260	112258541	1500670	3469492	37733916	24887	38509728.241	NA	4912.002	33417.42	2850434.447	457784.291	201872.202	40212.805	NA	754884.961	565686.69	790676.506	1218145.941	861638.793	3359031.342	434416.109
colon-677-FMT-AKK-Pas_72	15833156.61	18267	12633	159897	7809	3821731.376	219731	4437720	306394	36261847	10329	1743044	14455075.472	65900163.198	7023758	182004279	19709	2920511	26944	88975124	174978	1274149.056	49612742.781	31274352.939	442544	13701607	770522.489	35949676	119112058	12261713	2925951	17734779	23627	22609406.918	2437.263	2315.176	32095.115	2847894.855	355553.471	143144.976	66103.328	11580.156	477086.281	165521.466	252702.902	403603.017	405951.801	1957618.856	3381861.093
colon-693-SPF_88	34431978.38	14342	15383	170000	1716	16376755.657	354550	25915135	522536	40796421	7914	725169	43515731.757	NA	10203612	220846475	72603	5165034	60883	17560625	473727	5492027.96	192581938.576	23824668.409	743829	12156349	2757519.505	31448165	136280432	6099362	1554470	40773294	11202	44165518.857	58703.694	NA	189029.125	3090463.313	706706.467	623202.181	240267.7	338962.233	4709314.425	773349.757	1811363.169	4546702.106	1543459.74	10176112.761	NA
colon-672-FMT-AKK_67	27925745.563	6520	3665	9351250	12177	28093285.07	805373	14800858	1959214	204062905	50966	991128	41488774.937	37497631.004	1751914	412375509	74054	3492469	31995	82415787	269610	6749922.676	142898157.031	189119135.914	2262595	48012134	2823734.983	27126562	137215197	12048350	2271372	38560380	18843	78177225.339	1632212.16	1322118.072	3235974.2	2631327.477	1333461.709	3620991.38	5844341.114	1788386.455	1673398.943	1830867.262	1870073.792	1612024.55	1694461.304	5921495.261	23506004.578
colon-694-ATB_89	36309953.203	1905	2733	3905860	9305	8234120.799	334616	124739012	4074514	123229456	1886	203290	25540732.378	3512316.31	3706544	145107871	9194758	143107	24455	29813765	1106279	3950788.568	30110585.746	88748801.934	731752	21805603	2033997.475	20600423	116546346	1417350	23468	8964942	9712	35824065.069	560830.937	645439.868	2162390.786	2834403.946	1802254.965	3458770.047	913784.594	3651901.615	1606244.021	1311337.481	327348.333	955945.052	1809867.928	16457357.807	1344129.012
colon-671-FMT-AKK-Pas_66	15231049.378	24384	8772	163925	8797	6855731.959	369417	2991596	2408786	80929937	27252	1303337	30659304.969	79347804.342	8452639	152907407	18918	4192197	43902	60385542	12543	5086564.727	134035640.725	39732697.074	322085	6915446	1691089.126	32519646	103766262	8690988	2320092	28276143	20524	30197070.76	21551.231	3847.463	117569.908	2553823.973	606895.245	589790.949	75778.297	75958.59	2538103.194	712932.193	908877.483	2186978.171	1212966.582	3734939.35	16134664.1
colon-695-SPF_90	28667922.086	5995	5200	169892	2428	13214934.302	339858	28837980	542415	58331083	19845	615793	45801959.339	NA	10740029	255702053	57757	8075698	62157	29419433	401189	4852555.555	128295516.896	22274727.915	538625	33097101	2414711.058	29358875	128238377	9801853	1862845	30611366	14123	33001674.546	550288.881	127406.639	1079884.279	2608177.877	2157794.357	2623165.149	972137.529	1047682.296	2882888.279	2012275.312	1380656.587	2940540.34	2307444.32	7327759.807	5432471.951
colon-674-FMT-AKK_69	16516847.526	17409	15667	550285	10716	13745222.368	474732	15784784	777246	71465531	11370	1320597	38801782.371	37201132.311	1166416	206998375	65827	4422551	32594	91130856	273872	5905091.149	156372912.797	175084234.805	664992	24986382	2011438.735	24601310	84822494	29587516	1307937	57677544	22475	85678370.104	1192018.972	603683.882	3460648.861	2623113.036	1521485.955	3486951.257	6849219.553	1756765.061	2680140.945	1130515.493	NA	1487594.241	871327.961	5360161.6	17738564.732
colon-669-FMT_64	28922652.357	27848	2019	3018071	23432	30240925.292	1277780	43366867	2181869	281913948	4735	1219121	39121213.494	176261902.297	16125180	348158306	85291	1466784	30669	91104012	677594	3720918.522	70877743.257	25244526.177	1992790	62481854	1886273.983	31047489	192626642	727180	5208137	8646318	41331	69775933.402	13189.094	NA	15581.912	2576673.429	478221.99	50802.9	48445.663	41560.722	369940.284	132924.591	285287.781	508283.977	277522.216	5161107.507	2919444.522
St_mix_pre	NA	444847	304004	NA	180304	NA	NA	NA	NA	NA	NA	164961	NA	NA	NA	NA	NA	NA	NA	NA	NA	NA	NA	NA	NA	NA	NA	NA	NA	NA	149096	56625	318590	NA	NA	NA	NA	NA	NA	NA	NA	NA	NA	NA	NA	NA	NA	NA	NA
St_BA1_pre	NA	NA	NA	NA	NA	NA	NA	NA	NA	NA	407985	NA	NA	NA	NA	NA	NA	11831	NA	NA	NA	NA	NA	NA	NA	NA	NA	NA	NA	12493	NA	NA	NA	NA	NA	NA	NA	NA	NA	NA	NA	NA	NA	NA	NA	NA	NA	NA	NA
St_AA_pre	NA	NA	NA	54993	NA	NA	165	12340756	15330	1376481	NA	NA	NA	NA	1571	29380773	26	NA	175	14906	687	NA	NA	NA	244	2083186	NA	8059339	105285532	NA	NA	NA	NA	NA	NA	NA	NA	NA	NA	NA	NA	NA	NA	NA	NA	NA	NA	NA	NA
St_BA2_pre	NA	NA	NA	NA	NA	NA	NA	NA	NA	NA	843	NA	NA	NA	NA	NA	NA	4331	NA	NA	NA	NA	NA	NA	NA	NA	NA	NA	NA	1114509	NA	NA	NA	NA	NA	NA	NA	NA	NA	NA	NA	NA	NA	NA	NA	NA	NA	NA	NA
St_AA_post	NA	NA	NA	97719	NA	NA	4158	23155327	25881	13098997	NA	NA	NA	NA	90654	76182667	3012	NA	536	262708	6136	NA	NA	NA	1219	4839210	NA	7381594	152123001	NA	NA	NA	NA	NA	NA	NA	NA	NA	NA	NA	NA	NA	NA	NA	NA	NA	NA	NA	NA
St_BA2_post	NA	NA	NA	NA	NA	NA	NA	NA	NA	NA	1209	NA	NA	NA	NA	NA	NA	7490	NA	NA	NA	NA	NA	NA	NA	NA	NA	NA	NA	1460476	NA	NA	NA	NA	NA	NA	NA	NA	NA	NA	NA	NA	NA	NA	NA	NA	NA	NA	NA
St_BA1_post	NA	NA	NA	NA	NA	NA	NA	NA	NA	NA	514922	NA	NA	NA	NA	NA	NA	40730	NA	NA	NA	NA	NA	NA	NA	NA	NA	NA	NA	9841	NA	NA	NA	NA	NA	NA	NA	NA	NA	NA	NA	NA	NA	NA	NA	NA	NA	NA	NA
[truncated: 186 more columns]

## Sheet: Height
Sid	2-deoxycytidine@1.43-qppos	2-hydroxy-3-methylbutyric acid@4.58-sf	2-hydroxybutyric acid@2.49-sf	2-oxoglutaric acid@13.19-gc	3-hydroxybutyric acid@1.66-sf	3-methylhistidine@0.99-qppos	4-hydroxymandelic acid@15.38-gc	4-hydroxyproline@12.60-gc	5-aminovaleric acid@13.70-gc	5-oxoproline@12.53-gc	7,12-dihydroxy-3-oxocholanoic acid@7.12-ba	Acetic acid@1.78-sf	Acetylcarnitine@1.23-qppos	Acetylcholine@1.07-qppos	Adenine@16.39-gc	Alanine@7.03-gc	Allantoin@16.73-gc	Alpha-muricholic acid@5.96-ba	Alpha-tocopherol@29.54-gc	Arabinose@14.34-gc	Arabitol@15.04-gc	Arachidic acid@23.82-qpneg	Arachidonic acid@20.30-qpneg	Arginine@0.98-qppos	Asparagine@14.30-gc	Aspartic acid@12.54-gc	Behenic acid@25.11-qpneg	Benzoic acid@8.93-gc	Beta-alanine@11.33-gc	Beta-muricholic acid@6.26-ba	Butanoic acid@5.27-sf	Cadaverine@4.61-pa	Caproic acid@12.07-sf	Carnitine@1.02-qppos	Carnitine C10:0@12.39-qppos	Carnitine C10:1@11.60-qppos	Carnitine C12:0@13.80-qppos	Carnitine C12:1@10.69-qppos	Carnitine C14:0@15.86-qppos	Carnitine C14:1@14.94-qppos	Carnitine C14:1(OH)@13.51-qppos	Carnitine C14:2@14.08-qppos	Carnitine C16:0@17.59-qppos	Carnitine C16:1@16.41-qppos	Carnitine C18:0@19.49-qppos	Carnitine C18:1@18.07-qppos	Carnitine C18:2@17.04-qppos	Carnitine C3:0@1.59-qppos	Carnitine C4:0@2.66-qppos
BlM_pre	NA	23	19	444	71	20057.981	14	2483	2720	135506	24	2043	6798.037	NA	194	280326	92	2360	322	5081	294	72981.537	21044.421	214680.65	3070	501	9092.961	2602799	61732671	204	162	29081	604	29204.761	1092.997	NA	NA	589087.855	18462.145	NA	NA	NA	NA	NA	NA	NA	896.281	NA	NA
BlM_post	NA	13	11	924	57	10165.187	19243	722074	4029	6036217	33	2386	4915.817	7017.725	47657	348539	787	738	475	21554	2359	90117.999	49606.565	211310.282	3838	304503	9608.284	3794678	72639332	452	369	9199	479	26626.542	976.362	NA	NA	590307.038	14763.386	NA	NA	NA	NA	NA	NA	NA	1372.393	NA	NA
QC_colon_4a	2470968.624	2260	1230	NA	946	1506166.005	NA	NA	NA	NA	NA	116392	3369967.164	8142736.634	NA	NA	NA	NA	NA	NA	NA	547624.312	10651098.712	11408344.544	NA	NA	283911.751	NA	NA	NA	151916	3107724	2048	7366186.764	40430.007	46937.821	69482.449	385073.592	45776.59	65080.556	183539.044	89854.973	77294.686	40233.433	36747.145	59389.653	58403.595	1124128.734	925848.379
QC_colon_5a	NA	NA	NA	3254042	NA	NA	214886	21608453	870892	53005555	NA	NA	NA	NA	1790529	166009572	748212	NA	21512	38289563	252967	NA	NA	NA	231974	23021439	NA	21081425	87788738	NA	NA	NA	NA	NA	NA	NA	NA	NA	NA	NA	NA	NA	NA	NA	NA	NA	NA	NA	NA
QC_colon_4b	2531023.497	2068	1228	NA	1044	1598755.273	NA	NA	NA	NA	NA	120969	3363983.97	8659707.039	NA	NA	NA	NA	NA	NA	NA	479532.464	10315937.716	11890036.935	NA	NA	192244.428	NA	NA	NA	164544	3257456	2380	6697803.032	46297.844	38104.702	64186.235	438997.996	47717.799	60238.674	173531.217	86552.072	105777.587	41375.969	38682.051	64029.271	54498.143	1076320.95	842981.578
QC_colon_5b	NA	NA	NA	3502814	NA	NA	291706	24923617	981984	64440442	2230	NA	NA	NA	2839898	165949839	615841	666060	21581	41606041	280631	NA	NA	NA	461104	25931264	NA	22502696	89435725	1068664	NA	NA	NA	NA	NA	NA	NA	NA	NA	NA	NA	NA	NA	NA	NA	NA	NA	NA	NA
QC_colon_4c	2305046.007	2174	1283	NA	1033	1408249.548	NA	NA	NA	NA	NA	120545	3025424.12	8943359.229	NA	NA	NA	NA	NA	NA	NA	455264.701	12039140.161	10595324.25	NA	NA	205564.267	NA	NA	NA	157510	3318699	2532	6989243.126	42552.921	43252.57	71776.322	387363.042	49654.843	68083.229	193071.773	76192.656	83450.814	37270.188	38640.081	67420.975	53480.216	909805.392	880002.074
QC_colon_5c	NA	NA	NA	2666325	NA	NA	293573	26637191	873864	67077669	2244	NA	NA	NA	2887590	162511592	1100166	643285	18792	39586783	374162	NA	NA	NA	560909	24718418	NA	18342965	77536776	1081999	NA	NA	NA	NA	NA	NA	NA	NA	NA	NA	NA	NA	NA	NA	NA	NA	NA	NA	NA
QC_colon_5e	NA	NA	NA	2450712	NA	NA	385150	27592410	947456	86341395	2306	NA	NA	NA	3606335	152237193	1187843	577221	22516	47402137	315533	NA	NA	NA	584301	27800071	NA	24369709	97707710	1034944	NA	NA	NA	NA	NA	NA	NA	NA	NA	NA	NA	NA	NA	NA	NA	NA	NA	NA	NA
QC_colon_4d	2276191.389	2252	1290	NA	975	1545015.63	NA	NA	NA	NA	NA	121443	3169557.682	7815455.404	NA	NA	NA	NA	NA	NA	NA	587407.091	13447954.463	12244699.522	NA	NA	206267.709	NA	NA	NA	159204	3590689	2787	7991521.251	40588.049	45040.595	66017.263	415220.513	51035.261	63210.891	174795.471	83146.342	93515.968	34609.222	35881.505	59211.596	52714.395	920183.348	873458.776
QC_colon_5d	NA	NA	NA	152992	NA	NA	297077	6338699	1558393	62583076	2412	NA	NA	NA	1747281	165904443	3108323	763734	14107	158123149	727193	NA	NA	NA	5317780	44695379	NA	28518674	72269930	1084453	NA	NA	NA	NA	NA	NA	NA	NA	NA	NA	NA	NA	NA	NA	NA	NA	NA	NA	NA
QC_colon_4e	2487865.435	2065	1212	NA	994	1439937.641	NA	NA	NA	NA	NA	122321	3436603.356	7225063.185	NA	NA	NA	NA	NA	NA	NA	536653.072	11431893.89	10763164.044	NA	NA	233444.088	NA	NA	NA	166720	3509904	2926	6432425.616	43860.171	34991.39	79638.866	442940.703	47797.747	65528.684	170870.411	77077.901	76338.265	36239.735	32379.392	59343.893	55797.328	963444.112	788278.966
QC_colon_5f	NA	NA	NA	NA	NA	NA	NA	NA	NA	NA	2664	NA	NA	NA	NA	NA	NA	658589	NA	NA	NA	NA	NA	NA	NA	NA	NA	NA	NA	1203160	NA	NA	NA	NA	NA	NA	NA	NA	NA	NA	NA	NA	NA	NA	NA	NA	NA	NA	NA
colon-666-FMT_61	700230.832	1839	295	885055	576	1500041.467	292747	12925045	1005477	82095394	900	124863	2196180.542	16821914.263	2209516	155731836	13761	895079	18927	34486008	121267	296169.929	5103556.316	1833655.402	1392365	53492546	123182.986	20408741	93466865	255586	193717	3122926	2716	6134126.015	878.425	939.683	1871.662	386488.375	11653.54	2228.534	5519.223	NA	23145.472	11456.46	16938.803	24133.13	13638.995	128761.413	115201.418
colon-667-FMT-AKK-Pas_62	3792891.043	6066	5337	91530	1066	996355.316	118983	3838791	222831	15981314	3968	164805	6588354.559	10207497.165	2146412	101840434	11877	490886	16317	48956553	67528	385906.212	9421604.483	6524860.244	172015	8615275	162255.703	11382056	44786311	1883176	157051	3920974	1810	7000341.013	26308.306	13713.436	38248.744	363161.932	41208.66	47774.656	35876.365	36001.154	91181.404	39025.128	34208.869	59159.74	71039.75	508257.662	2352525.66
colon-684-SPF_79	1430732.276	268	621	166552	210	750061.54	127915	10021499	320497	20081333	1141	137929	1820199.92	NA	4829038	116119648	8464	1088873	26121	26286310	160659	407861.938	19986757.302	2744578.59	79617	10972634	225746.754	19019812	78744790	1163202	172109	2520417	1212	2537485.788	1543.404	NA	6992.051	416337.939	20956.411	24443.096	18771.308	7120.578	56384.474	17983.663	36662.064	58437.64	43648.408	275148.749	192219.909
colon-668-FMT-AKK_63	NA	768	215	11663481	1330	5289495.934	505757	10801524	1610051	129402224	16407	93052	3119088.745	11685697.455	796512	165872548	18807	485174	14709	73308362	282979	395326.747	12755350.315	50401464.512	553053	32220712	284480.469	21284947	134353734	1685709	134107	1625006	1172	20418384.087	89807.783	111610.11	193902.021	378836.798	33317.484	83473.264	601859.849	56065.025	73844.491	50544.046	57664.605	53435.821	41043.74	322357.011	1634714.13
colon-690-ATB_85	3595130.065	246	442	8918216	1370	848495.281	96668	74045928	1331306	50371289	167	37100	1333926.948	353320.359	999984	85397728	5280243	74341	9277	17360526	631145	170835.885	1503019.808	15068025.229	263880	11145485	96932.679	16381054	64921173	478481	6709	1191841	929	3591742.686	48126.791	49684.087	78595.121	458625.689	34087.821	97155.631	56477.692	225888.01	31399.627	27452.026	6320.399	25816.531	51491.715	1000597.577	51508.62
colon-681-FMT-AKK-Pas_76	4412664.663	9438	2846	220394	895	931737.871	266735	4806145	456290	26781849	6283	137700	7587812.076	10431043.17	3161901	164367364	49681	438436	22360	35113110	133048	143256.608	5653530.769	6642399.083	207279	19393741	75999.094	18675302	76435190	2271476	96436	3656683	2482	12279783.254	16677.217	2567.232	14429.31	408419.623	26549.638	18549.577	33079.614	19194.832	94518.711	22493.476	35134.811	48772.689	26676.902	703491.121	2132427.436
colon-670-FMT_65	873751.723	1371	753	102947	458	475380.077	99600	3437093	325952	23259935	615	118798	4013883.886	7892846.943	3150553	119547367	15006	451468	13175	31457228	79649	531744.157	7375061.943	904311.962	127564	18900538	240702.089	18488352	73471804	460875	126811	3044830	1523	5902784.838	6605.297	1231.331	20165.201	466908.018	34952.899	34839.93	26691.493	13370.132	68407.156	30123.705	29767.046	44411.39	44221.827	501788.289	859363.939
colon-685-SPF_80	1814909.768	36	186	2328725	288	2162823.484	468786	28643385	979293	114919387	2918	154148	2071038.409	19652673.546	3560698	165211038	6461	1696626	23793	25341844	418208	288224.249	11592832.35	4342121.003	407924	16134803	108526.607	22860232	82735678	766273	272109	288180	2238	4498281.917	NA	1915.099	1662.794	458876.016	9938.901	11817.777	6052.606	NA	10189.73	4422.616	13044.298	14046.164	12322.975	336374.548	19988.758
colon-675-FMT-AKK_70	1218818.138	1205	2096	2149320	553	1220447.922	276347	3516117	652328	51872406	2386	100518	3775693.591	2238495.947	484106	164659465	21340	310850	16825	37244156	97160	411763.937	5509949.734	18901821.656	368845	29769459	239742.143	20587932	93678663	1379515	101102	3967275	1416	13573040.907	117061.756	82861.196	116312.039	441660.159	35456.727	83502.77	542996.821	77390.191	56394.427	25639.244	29531.162	33051.146	30363.626	721675.728	1255870.535
colon-692-ATB_87	3043740.78	168	378	3614256	870	689673.153	90915	52905936	1375734	42091755	123	34618	1167291.499	151144.269	777911	52788975	4964336	34939	8299	18440625	552048	307274.317	1639945.171	10903456.38	227388	8451479	90985.724	15670536	70442242	322998	794	1231195	698	2460658.617	44018.292	70846.216	70363.784	394442.372	32006.783	90611.227	39957.063	220706.794	28179.845	27207.205	3436.067	18927.541	59106.605	1232003.43	48680.951
colon-683-FMT_78	2954118.361	5548	4988	24718	637	977759.688	40233	8523271	163926	13617711	6048	180588	2086490.621	9363405.328	1734314	73658902	3754	621223	10393	23716058	62919	391042.059	9278506.458	3561336.05	58092	11430218	178665.456	12253741	47943109	728250	188206	3736694	1948	3914697.374	6826.233	2368.456	14253.255	400404.651	35473.672	22456.732	55632.285	9267.917	87639.551	32377.735	38821.583	54504.506	65826.768	267829.317	1066092.566
colon-689-SPF_84	NA	110	212	1871908	815	1819607.512	452224	6330316	792387	164879189	847	104014	3156193.446	22944645.118	1773408	27450433	4572	888631	34734	35276636	409569	840642.445	16449571.592	5483418.371	190943	9408897	268149.172	13284331	56661596	315595	291696	370696	2853	5546680.024	2051.825	1180.164	7778.758	374333.11	29522.944	39436.089	NA	20492.543	77495.6	24416.071	23761.347	77355.479	37387.686	437459.615	67056.833
colon-680-FMT-AKK_75	754616.816	1081	792	737288	668	1222006.537	300608	4559075	324140	34354768	3085	95161	3804667.4	3212667.945	455460	154214028	15789	519295	26617	56426880	98499	648211.179	11518173.159	7839886.592	261344	9690342	289204.041	21462646	79335050	2226728	61677	5411291	1698	12900616.157	153791.022	115919.602	387000.435	411011.32	76929.625	142628.71	1136463.373	150258.46	159390.745	58624.594	98519.319	65220.976	88083.499	690472.158	1487808.955
colon-686-ATB_81	4252550.58	444	663	4229392	3450	1231577.193	222012	93338163	1732754	72222544	1045	56317	5023626.498	1733184.932	2050761	70403783	5452788	86608	11868	29228882	940767	345837.871	5056373.89	22424714.778	515512	21075803	204645.978	10582675	54273133	488007	42660	1329385	1075	7076130.594	98337.349	131867.439	149077.247	404547.108	83864.019	198058.825	151123.857	352196.244	95752.131	64662.781	26192.501	50944.936	89656.168	6285693.128	620838.759
colon-676-FMT-AKK-Pas_71	4064725.613	4650	1429	46831	788	461806.3	108982	2804846	200052	19250185	6108	181486	1037030.149	7567326.274	2150133	40038695	6813	700112	16911	36089767	81299	166400.783	3570680.279	4909619.284	86226	6578180	48738.02	22882482	73511431	2274989	204416	1912802	2798	3244265.642	1593.663	NA	11451.876	392528.659	18478.601	15295.616	50857.604	NA	36165.433	17467.479	14018.197	23705.166	29926.225	111450.367	127326.267
colon-682-FMT_77	3417384.092	2667	316	1863683	962	3152565.354	545337	40022253	1551647	136728652	847	166723	3515622.583	14458237.249	4012516	165405587	19314	1324164	23297	43716625	255763	372691.158	3644824.553	2866210.92	987902	54311297	243462.31	21360333	132025033	108879	231199	4861995	4196	8272322.658	2780.476	935.337	3313.271	395792.673	22244.609	4121.912	4401.128	NA	25156.543	8533.828	24505.196	25202.655	23573.823	286591.42	780475.669
colon-688-ATB_83	3958415.549	221	391	7430543	1032	1073565.412	174395	74169075	1964489	54190906	335	26539	4649093.204	472945.263	1301735	97099040	7828676	46875	13195	15951362	940927	565571.717	6340861.491	15582751.143	342530	7901983	274174.604	7326747	63187360	339627	1324	1323041	913	6274666.614	64952.664	82067.36	117888.917	401932.055	103573.972	176032.355	56595.472	281970.351	129505.443	77969.396	20654.728	52942.856	97854.051	5684905.44	205020.343
colon-687-SPF_82	596115.324	1221	371	661287	1160	1056133.924	462129	19028251	1225322	111986840	858	123262	3060832.103	7086751.407	2733395	165079210	16423	960404	11775	19400673	79805	364293.426	11441883.153	7422558.989	595983	67627627	161718.03	15562680	66310427	521186	309717	300282	2186	5917909.346	1855.138	1260.216	9721.919	371449.081	25759.188	18802.405	27237.53	6788.211	50183.954	19754.899	23320.341	37391.252	31119.705	276193.895	959420.429
colon-679-FMT-AKK_74	2109521.168	914	692	1108063	731	2395025.552	293681	7456307	641675	54195944	1718	108711	4034041.87	10656947.939	556221	166151368	40392	362225	16803	44829061	111010	493308.683	29956205.759	42208293.766	355474	12265453	237459.783	14193254	81649768	1649362	110645	6409579	1623	14548668.378	116865.794	143208.305	253567.565	355228.447	96948.567	113898.201	790089.369	134099.126	144726.289	58230.676	96091.445	72164.655	87544.258	403278.484	1397669.491
colon-673-FMT-AKK-Pas_68	630659.273	5817	2921	3560262	625	2469837.85	318477	8384124	987539	87060547	4171	78482	2218992.125	9338640.09	956185	163558078	20616	356239	18637	41937409	71623	615180.862	10497589.941	13570027.975	920958	34475859	357520.427	20887830	99160676	1389118	103930	4329076	2123	10534465.486	35019.663	30869.515	112445.672	426824.698	15764.764	34708.907	225249.423	14544.916	22248.007	11898.222	15287.625	12872.255	13678.292	283991.227	1157455.786
colon-691-ATB_86	3564046.486	168	382	5101076	1159	992307.24	126759	55235004	1555919	57077137	262	23294	1689370.343	200388.145	972458	49420942	5133094	58901	14342	12171232	1156841	425888.773	5122894.669	14835458.412	229856	7791822	174009.849	20718674	75293626	413588	454	735762	1019	3453929.406	71989.402	97945.385	123363.144	396874.08	67388.658	183041.377	75159.122	405017.973	75301.161	56652.985	13255.109	47202.923	125484.284	2518727.664	90815.019
colon-678-FMT_73	3888912.965	3588	475	2252096	1623	3143350.504	413021	29708855	1522147	123535935	691	155437	1030160.808	14062989.571	2270800	128503587	9179	1099920	18674	43884213	155239	508694.685	15864554.329	2790131.443	514601	25474777	439070.463	14069965	72399515	163545	234334	4867317	2691	6208936.409	NA	1898.667	4630.904	399849.038	32666.387	13723.639	7021.431	NA	51564.692	34890.065	38236.815	57295.666	59832.578	125929.747	49457.144
colon-677-FMT-AKK-Pas_72	1803267.933	2650	1650	94999	1005	383857.106	130968	2661953	199240	19423732	1232	179504	1501238.516	8608948.01	3442439	117310914	9647	478733	17702	50969419	102409	141216.725	5159171.706	3355330.016	214104	8349165	94474.953	22695431	78804189	1473545	185586	2390613	2742	3038655.949	921.704	867.567	5435.761	439094.567	17104.805	10416.678	10605.695	3744.608	37694.053	10955.805	13323.019	25172.708	31348.617	121486.168	419209.8
colon-693-SPF_88	3831639.708	1668	1977	111033	228	1565219.271	213278	15713232	323242	21799590	1023	79600	4015081.131	NA	5382179	135953378	31266	972423	37999	10003819	220767	564557.552	22898848.846	2661678.593	403258	7391029	371336.304	20386059	89234214	729096	105891	5463344	1439	5537445.265	7504.605	NA	21362.654	485252.066	53611.151	44895.529	33196.918	16758.842	320842.61	56659.651	84456.244	268423.486	99652.861	467691.352	NA
colon-672-FMT-AKK_67	2484538.558	1159	461	6067781	1525	4297554.899	496216	8974699	1114905	110822917	6139	105859	3401613.571	7355493.547	860685	166160215	33118	458811	18138	48528024	156566	689300.646	16399657.051	34908089.188	1220436	29790791	362023.264	17415536	90745967	1448011	150902	4653512	2065	12477856.945	196053.4	177067.372	266168.975	400952.205	77473.734	165231.189	652192.447	167454.738	113056.069	86156.208	84338.13	86038.495	113426.498	516209.931	2630234.83
colon-694-ATB_89	4022377.462	228	396	2379328	1404	1080275.523	188541	78874032	2294208	65884507	203	24307	3410560.342	389642.629	1725958	88853564	4821873	26306	14562	16831394	944308	426213.517	4356127.897	14701422.014	406171	13151904	217943.907	11032640	77251092	178373	1744	949914	1194	4852396.309	76152.703	91755.662	119606.836	433655.828	110641.036	223783.953	57399.447	409491.347	95704.446	88895.787	15493.423	57088.16	138631.378	3075198.953	139972.504
colon-671-FMT-AKK-Pas_66	1567531.697	3367	1156	111722	1210	709550.715	224056	1733583	1660310	43531764	3164	139917	3300356.66	9381361.363	4155141	47826480	9130	974106	26556	37218946	20576	581265.057	15524575.656	4376432.501	119433	4269845	188671.424	18745562	62708775	1023724	151465	3990032	2464	4170508.584	4592.55	1535.168	13366.79	385018.909	49657.406	43479.928	8195.372	9082.581	169714.61	44442.949	41118.772	142850.49	87218.968	304892.243	2041004.782
colon-695-SPF_90	3387073.282	675	641	113373	318	1199719.509	203723	17511673	355946	30123376	2400	69255	5216341.815	NA	5523896	146836884	27143	1351741	35334	17001787	186968	471139.059	13502555.079	2860608.548	257017	19866108	367486.241	18549367	84319019	1144474	122605	4165960	1723	4183562.788	66589.153	21676.043	108705.105	370155.84	148317.759	189461.428	122452.541	83482.257	192641.464	121006.952	69295.945	176691.077	149603.892	348004.642	650777.041
colon-674-FMT-AKK_69	854881.606	3001	2400	340872	1401	1547621.266	278550	9314254	474576	37455240	1394	139946	3384230.15	7022163.554	541022	95208636	31315	589684	19901	52233318	125789	765524.758	18809673.588	30090767.148	335096	15353682	241923.764	14866279	54110016	3421364	98869	7667796	2576	12793101.984	164335.966	75295.34	314016.425	412940.914	89879.101	187889.005	759897.848	134082.234	172730.087	52369.557	NA	85805.998	65576.892	625731.855	2088955.011
colon-669-FMT_64	2649267.049	3773	263	1964870	3233	3743940.73	686263	26549477	1370187	136822280	694	128905	3439245.592	18148742.212	8791417	165607257	40893	472472	17275	53767968	308970	347129.92	7967074.193	2670530.364	944700	38333932	183435.457	20191234	123945923	100160	311402	1195835	4706	9709246.413	2212.416	NA	2289.758	416862.691	18905.489	7312.031	7880.401	5567.558	29087.367	9558.631	14108.392	30831.689	23768.726	230162.388	366354.008
St_mix_pre	NA	38092	34180	NA	24076	NA	NA	NA	NA	NA	NA	18682	NA	NA	NA	NA	NA	NA	NA	NA	NA	NA	NA	NA	NA	NA	NA	NA	NA	NA	13448	8121	38730	NA	NA	NA	NA	NA	NA	NA	NA	NA	NA	NA	NA	NA	NA	NA	NA
St_BA1_pre	NA	NA	NA	NA	NA	NA	NA	NA	NA	NA	49675	NA	NA	NA	NA	NA	NA	6309	NA	NA	NA	NA	NA	NA	NA	NA	NA	NA	NA	NA	NA	NA	NA	NA	NA	NA	NA	NA	NA	NA	NA	NA	NA	NA	NA	NA	NA	NA	NA
St_AA_pre	NA	NA	NA	27666	NA	NA	159	7340566	9629	604118	NA	NA	NA	NA	516	20251842	57	NA	306	8042	426	NA	NA	NA	140	1234138	NA	4594630	71703503	NA	NA	NA	NA	NA	NA	NA	NA	NA	NA	NA	NA	NA	NA	NA	NA	NA	NA	NA	NA
St_BA2_pre	NA	NA	NA	NA	NA	NA	NA	NA	NA	NA	114	NA	NA	NA	NA	NA	NA	NA	NA	NA	NA	NA	NA	NA	NA	NA	NA	NA	NA	144438	NA	NA	NA	NA	NA	NA	NA	NA	NA	NA	NA	NA	NA	NA	NA	NA	NA	NA	NA
St_AA_post	NA	NA	NA	48929	NA	NA	1377	12875727	17306	5762608	NA	NA	NA	NA	16678	39529652	1275	NA	377	141638	3483	NA	NA	NA	541	2657868	NA	3371853	97694494	NA	NA	NA	NA	NA	NA	NA	NA	NA	NA	NA	NA	NA	NA	NA	NA	NA	NA	NA	NA
St_BA2_post	NA	NA	NA	NA	NA	NA	NA	NA	NA	NA	108	NA	NA	NA	NA	NA	NA	NA	NA	NA	NA	NA	NA	NA	NA	NA	NA	NA	NA	188421	NA	NA	NA	NA	NA	NA	NA	NA	NA	NA	NA	NA	NA	NA	NA	NA	NA	NA	NA
St_BA1_post	NA	NA	NA	NA	NA	NA	NA	NA	NA	NA	60907	NA	NA	NA	NA	NA	NA	15160	NA	NA	NA	NA	NA	NA	NA	NA	NA	NA	NA	1796	NA	NA	NA	NA	NA	NA	NA	NA	NA	NA	NA	NA	NA	NA	NA	NA	NA	NA	NA
[truncated: 186 more columns]

## Sheet: AreaQCCorr
Sid	2-deoxycytidine@1.43-qppos	2-hydroxy-3-methylbutyric acid@4.58-sf	2-hydroxybutyric acid@2.49-sf	2-oxoglutaric acid@13.19-gc	3-hydroxybutyric acid@1.66-sf	3-methylhistidine@0.99-qppos	4-hydroxymandelic acid@15.38-gc	4-hydroxyproline@12.60-gc	5-aminovaleric acid@13.70-gc	5-oxoproline@12.53-gc	7,12-dihydroxy-3-oxocholanoic acid@7.12-ba	Acetic acid@1.78-sf	Acetylcarnitine@1.23-qppos	Acetylcholine@1.07-qppos	Adenine@16.39-gc	Alanine@7.03-gc	Allantoin@16.73-gc	Alpha-muricholic acid@5.96-ba	Alpha-tocopherol@29.54-gc	Arabinose@14.34-gc	Arabitol@15.04-gc	Arachidic acid@23.82-qpneg	Arachidonic acid@20.30-qpneg	Arginine@0.98-qppos	Asparagine@14.30-gc	Aspartic acid@12.54-gc	Behenic acid@25.11-qpneg	Benzoic acid@8.93-gc	Beta-alanine@11.33-gc	Beta-muricholic acid@6.26-ba	Butanoic acid@5.27-sf	Cadaverine@4.61-pa	Caproic acid@12.07-sf	Carnitine@1.02-qppos	Carnitine C10:0@12.39-qppos	Carnitine C10:1@11.60-qppos	Carnitine C12:0@13.80-qppos	Carnitine C12:1@10.69-qppos	Carnitine C14:0@15.86-qppos	Carnitine C14:1@14.94-qppos	Carnitine C14:1(OH)@13.51-qppos	Carnitine C14:2@14.08-qppos	Carnitine C16:0@17.59-qppos	Carnitine C16:1@16.41-qppos	Carnitine C18:0@19.49-qppos	Carnitine C18:1@18.07-qppos	Carnitine C18:2@17.04-qppos	Carnitine C3:0@1.59-qppos	Carnitine C4:0@2.66-qppos
BlM_pre	NA	167.684	133.62	671.458	490.071	134697.221	25.853	7091.828	2336.578	324128.487	257.448	16025.875	44404.577	NA	229.226	404135.562	30.308	18476.072	438.735	7129.184	239.684	676549.716	364585.646	1159959.687	3934.143	1138.703	64330.078	4803114.756	97814305.501	1600.373	2548.199	288708.893	6170.169	177817.214	3057.67	NA	NA	4033150.476	202111.327	NA	NA	NA	NA	NA	NA	NA	2439.825	NA	NA
BlM_post	NA	59.808	77.182	245.143	334.473	66937.397	33734.22	695105.764	7621.104	11686639.969	266.893	18878.756	22763.511	82401.592	155259.711	1081517.901	2187.538	2338.048	57.111	65186.977	6224.958	731844.998	845404.9	1128037.43	16985.404	614997.964	64290.601	8262752.622	102015841.795	3260.133	4373.895	63808.146	3075.61	164112.47	2747.692	NA	NA	4033066.632	137309.571	NA	NA	NA	NA	NA	NA	NA	3825.88	NA	NA
QC_colon_4a	23223485.357	14668.302	9722.771	NA	7230.804	11927423.985	NA	NA	NA	NA	NA	1146959.614	31068068.147	68635726.914	NA	NA	NA	NA	NA	NA	NA	4324365.623	90405798.214	69929685.917	NA	NA	2050457.69	NA	NA	NA	2381909.352	23507099.44	20804.822	47115327.019	330558.035	267499.693	590452.643	2459759.586	838236.639	1282723.985	1503718.641	803145.385	1168343.199	668726.398	770247.82	1084232.346	849202.579	8385852.169	7322548.339
QC_colon_5a	NA	NA	NA	2750524.186	NA	NA	386862.023	26272112.221	1623368.861	102115120.909	NA	NA	NA	NA	3510487.275	331840514.36	1812897.681	NA	33732.958	89609610.73	454322.722	NA	NA	NA	841404.326	42074554.147	NA	33951621.454	126666002.62	NA	NA	NA	NA	NA	NA	NA	NA	NA	NA	NA	NA	NA	NA	NA	NA	NA	NA	NA	NA
QC_colon_4b	24082354.36	14555.76	9756.613	NA	8290.218	12936271.288	NA	NA	NA	NA	NA	1152550.201	30731898.722	68896757.935	NA	NA	NA	NA	NA	NA	NA	4287674.186	91978857.324	72013534.526	NA	NA	1710417.507	NA	NA	NA	2608300.106	24119022.002	21839.94	45446000.071	352937.936	297493.942	698875.826	2857668.438	862660.627	1219856.636	1625878.538	784662.927	1327867.956	602194.114	723926.372	1014523.36	790500.481	7881090.15	6869694.82
QC_colon_5b	NA	NA	NA	1987983.673	NA	NA	530100.123	25422665.829	2097594.137	122397323.348	17577.209	NA	NA	NA	4891373.417	373046649.638	1989165.57	3194212.707	32046.894	125583694.813	564288.064	NA	NA	NA	2279069.327	50759983.997	NA	36237436.194	127786438.751	8993592.651	NA	NA	NA	NA	NA	NA	NA	NA	NA	NA	NA	NA	NA	NA	NA	NA	NA	NA	NA
QC_colon_4c	22291102.432	14818.38	9832.51	NA	8212.876	11960100.455	NA	NA	NA	NA	NA	1151711.839	29212104.541	67175036.116	NA	NA	NA	NA	NA	NA	NA	4346396.638	85732635.562	67892409.429	NA	NA	1729317.707	NA	NA	NA	2386428.468	23253597.616	22139.685	45699598.851	329800.135	272453.846	1101015.989	2595615.135	849527.968	1193231.415	1499109.749	728709.756	1248802.986	561154.947	739562.884	1046762.575	777223.828	7406303.363	7105181.659
QC_colon_5c	NA	NA	NA	7330651.043	NA	NA	505565.212	57780920.909	1324478.751	131277266.081	18640.69	NA	NA	NA	6025282.324	324100982.394	1717705.259	3201048.261	35212.998	56175646.766	589144.509	NA	NA	NA	795000.281	38328164.212	NA	31688309.402	132416109.56	9157285.222	NA	NA	NA	NA	NA	NA	NA	NA	NA	NA	NA	NA	NA	NA	NA	NA	NA	NA	NA
QC_colon_5e	NA	NA	NA	2196317.759	NA	NA	657872.937	35469971.836	1852400.772	159226946.993	18665.264	NA	NA	NA	6465559.501	326461390.209	2807197.886	3072692.427	39641.201	110331735.766	541933.198	NA	NA	NA	1954075.735	50067200.878	NA	39989413.396	144094419.729	8960717.951	NA	NA	NA	NA	NA	NA	NA	NA	NA	NA	NA	NA	NA	NA	NA	NA	NA	NA	NA
QC_colon_4d	22931822.289	15085.411	9841.487	NA	7298.126	12841400.563	NA	NA	NA	NA	NA	1160724.107	30286753.257	70109638.898	NA	NA	NA	NA	NA	NA	NA	4470193.224	91508754.001	72164743.099	NA	NA	1957527.075	NA	NA	NA	2335662.504	24118877.729	21541.961	47927981.998	328169.997	308868.908	812199.492	2747420.376	906501.429	1255900.487	1624852.376	810478.044	1300588.719	606180.305	761375.112	1024696.264	794305.456	7897562.424	7089956.512
QC_colon_5d	NA	NA	NA	1362660.597	NA	NA	505545.292	23223639.334	1931104.088	124186476.405	18480.997	NA	NA	NA	4420033.464	377315762.533	2866831.349	3827868.02	30661.082	135902159.261	703631.602	NA	NA	NA	2389799.898	52496767.61	NA	37917582.395	125811436.237	9178283.266	NA	NA	NA	NA	NA	NA	NA	NA	NA	NA	NA	NA	NA	NA	NA	NA	NA	NA	NA
QC_colon_4e	23769078.956	14277.526	9639.451	NA	7381.307	12149772.298	NA	NA	NA	NA	NA	1145436.698	30216232.049	66445433.058	NA	NA	NA	NA	NA	NA	NA	4667034.214	88605679.824	68739713.101	NA	NA	2023630.946	NA	NA	NA	2500125.563	24635215.572	21405.227	43737296.368	355837	264955.875	794788.668	2691339.321	807932.191	1177754.636	1514341.977	729334.978	1259578.167	582990.775	708137.702	1037480.102	791358.52	7657870.924	6902733.931
QC_colon_5f	NA	NA	NA	NA	NA	NA	NA	NA	NA	NA	18592.696	NA	NA	NA	NA	NA	NA	3230992.724	NA	NA	NA	NA	NA	NA	NA	NA	NA	NA	NA	9082037.944	NA	NA	NA	NA	NA	NA	NA	NA	NA	NA	NA	NA	NA	NA	NA	NA	NA	NA	NA
colon-666-FMT_61	12575573.919	13782.146	2158.784	667844.537	4467.798	12306374.274	505880.089	15811567.129	2363998.399	164428824.923	7441.546	1219610.106	24818186.691	119408005.055	3908898.55	486913514.104	44614.677	2922877.321	28066.31	95271611.927	288164.801	2839719.515	58028576.546	16615247.204	5063858.431	113060546.375	1098744.731	35228831.042	138615818.3	2306475.716	3263344.855	23278543.328	29406.879	38242060.335	2322.92	2491.823	10126.662	2434833.668	116326.442	10157.756	29880.725	NA	290110.411	135254.657	296130.797	493205.426	251303.267	2484400.021	911689.705
colon-667-FMT-AKK-Pas_62	29785408.545	40384.009	40315.426	52259.942	8719.98	8930570.295	200068.344	3940814.445	416154.687	29465039.881	33722.17	1625329.249	46789412.997	87312629.538	3934956.842	230762665.598	36401.651	2902198.409	23429.636	137983714.623	136177.057	3183420.419	81098567.198	60005916.148	1085705.851	16958510.17	1313097.796	21122416.232	67448666.686	16017427.7	2308718.053	30407974.566	17593.584	42712660.308	190917.887	61430.561	359377.548	2548092.713	717817.294	695900.5	276922.699	349668.67	1208896.018	574211.534	722628.321	961788.204	948895.619	5119480.212	17862317.374
colon-684-SPF_79	14957818.684	1775.333	4672.071	83043.466	1733.723	8543195.347	210024.519	9729918.871	568864.811	36207697.78	9628.079	1358086.354	20443134.847	NA	8286653.045	200369669.414	31254.963	6386261.236	36668.9	78433533.196	492690.041	3749546.284	166502711.224	19979334.396	630762.75	22383706.614	1992784.439	32034736.351	111936385.384	10208190.669	2832264.262	19160500.92	11917.826	18933199.566	6811.93	NA	52441.103	2717619.865	395721.507	204677.402	90828.396	32004.846	836234.434	198758.521	639323.291	948261.241	656536.756	5608023.814	1527238.777
colon-668-FMT-AKK_63	NA	3978.854	1530.598	5669766.761	10479.879	35980133.192	894730.839	10179214.378	3020702.218	249121843.736	136486.873	873566.187	31797807.635	58020387.933	1336348.317	547709469.502	69981.65	3321329.284	20075.54	218675301.947	725663.319	4260303.923	105052559.181	291091224.007	3157674.664	67894068.659	2500226.649	35918595.513	196428325.43	14751349.636	1985896.199	15641550.418	11934.195	123692327.438	682007.316	745638.718	2550896.429	2414411.14	800521.62	1796784.095	5041720.756	678566.475	1067211.88	865149.285	1017007.428	926655.273	577182.601	4790394.051	13559461.325
colon-690-ATB_85	30822811.589	1751.802	3516.93	4167157.898	8337.213	6258157.273	165557.183	70844438.019	2805138.459	92319978.228	1354.738	325297.3	12511771.402	3342113.484	1789774.645	205567494.058	15830711.144	418401.161	13062.083	56591108.418	1184628.867	1782905.314	11355922.171	76658321.571	1449295.465	24701888.848	698118.558	28130816.375	98445137.853	3953073.944	89902.323	11078194.842	8417.719	25315987.525	301845.492	293244.541	1513064.347	2733965.987	656202.402	1423346.555	653853.158	2033817.548	342766.395	357575.861	74817.273	344640.181	708214.206	5723597.119	433624.731
colon-681-FMT-AKK-Pas_76	30781579.828	67832.847	21520.592	106239.43	7125.815	8767460.688	460891.105	4596745.76	919230.326	50972845.598	53874.178	1356135.135	54055122.298	91430558.327	5460438.213	358140382.473	181638.686	3066297.935	28903.446	104507216.726	475675.106	1456206.06	55887590.623	51034883.908	1059715.076	40078105.665	595094.372	31442513.023	108912465.372	19659749.705	1482889.628	29130960.706	24585.393	70924098.002	119910.515	6312.68	103730.576	2796277.785	565137.677	281384.02	239516.63	149773.47	1195921.215	292673.833	594489.501	709888.359	366330.987	6107746.735	16422367.133
colon-670-FMT_65	8991297.918	9144.887	5674.234	53622.712	3593.558	4487323.448	169628.584	3495352.566	657848.426	43584922.549	5270.598	1135394.25	29389143.659	65206958.025	5373801.183	211330085.615	49141.509	1813668.155	18205.623	85568328.858	303191.846	4215957.511	73552642.679	9631999.64	980729.97	38210397.71	2291854.027	32928916.118	104493761.638	3911647.253	1760533.67	22996528.114	14772.099	33000142.668	28137.727	3192.2	209131.221	3109406.72	686659.056	383632.956	208193.101	88384.719	861716.311	351356.057	510922.004	926553.7	715748.73	3525689.057	6312183.075
colon-685-SPF_80	21546304.183	267.713	1376.71	1472042.857	2155.543	17640561.23	840646.31	31230088.514	1924724.668	211168679.773	22663.939	1525595.21	27093192.403	151704663.556	6167169.063	381740079.153	25173.074	7536979.392	36207.043	69202328.546	1046856.27	2717758.241	109840982.546	29586872.944	1892920.972	30998190.96	1116721.134	37391545.473	119829155.834	6813373.942	4643395.931	2030812.483	19803.11	30005214.498	NA	4806.071	5343.352	2871185.069	104070.249	59154.449	40245.635	NA	107073.958	19551.366	199253.264	218039.624	129158.573	6899129.767	159820.205
colon-675-FMT-AKK_70	15078269.824	6488.238	16444.691	1643115.753	4406.14	9743384.827	478729.474	4205952.834	1124133.305	96397376.53	21555.07	928451.905	29802731.077	12795916.073	917709.207	353744060.265	72412.049	2361558.765	24052.573	90245180.204	205808.724	3687761.028	47482812.204	114521539.493	1332673.291	55899334.777	1965418.849	34465528.003	134100369.778	11618675.802	1474753.371	31840062.901	13684.483	82371632.707	870137.675	652203.893	2027842.621	2978781.189	699970.065	1732217.514	4495717.258	834117.458	749637.022	426660.856	636221.474	520074.258	406626.722	5367334.712	9540476.563
colon-692-ATB_87	25136917.119	1158.665	2867.046	3760346.223	4831.009	5444188.611	153446.422	72761472.506	2689958.762	77641458.166	1374.338	295485.729	10460288.152	1708852.052	1537561.877	148783599.393	11526362.18	256883.6	12297.356	45764116.882	795748.651	2490398.222	12361861.614	63619676.179	770180.458	17319441.401	749210.196	26289459.343	107878591.991	2635754.432	10204.727	8942913.27	5761.251	18224331.609	278282.804	376795.088	1307035.964	2682163.72	602802.826	1260878.815	484148.006	1841781.679	354515.763	307583.398	52426.298	280396.352	720307.529	6930918.076	457526.13
colon-683-FMT_78	23256390.771	39453.05	39425.916	28606.133	4289.022	7633203.811	68767.408	11991090.01	251556.933	24801079.042	48507.076	1809785.231	18836430.355	59577823.162	3632280.539	170263301.355	9935.897	2036898.122	15185.153	46365455.36	171649.995	3604339.212	86593154.376	26015008.961	190390.891	19457479.254	1731639.759	22393857.209	72103533.693	6189534.997	2899935.078	28761063.327	15705.799	28498176.061	38028.44	6013.086	110017.222	2760571.597	781850.072	337848.383	398034.032	87287.23	1018722.818	481504.386	723431.981	977581.407	983342.913	2654751.7	7866840.42
colon-689-SPF_84	NA	1511.459	1704.263	2358773.808	6088.513	17683622.79	792596.295	9305457.415	1565366.798	379378557.501	5108.6	974327.633	31055118.744	165761594.64	3640229.79	42639254.627	13957.655	3055189.851	51486.581	63980446.538	748598.504	6286069.331	161331840.925	38080011.125	649639.153	15188868.654	2362989.133	23800792.316	84880617.846	2875690.406	5123574.379	2611299.007	23237.298	37759162.308	7167.034	3112.486	34543.308	2530205.455	601668.426	459483	NA	224577.221	1043101.724	280859.416	581253.922	1128888.344	526245.09	8474362.023	614544.27
colon-680-FMT-AKK_75	14906826.363	5984.177	6157.122	1196048.044	5172.292	11720558.895	524469.347	7826468.418	458794.691	63844357.349	22432.319	873978.661	33336795.784	19211992.378	937478.754	279610236.888	40918.047	3379442.891	43124.35	95614680.539	180801.883	7020746.177	125102843.681	59239340.239	537775.488	15721367.195	3103562.102	33129374.882	120044867.166	19345507.233	884683.115	40487719.669	14759.187	79782854.236	1173592.22	804034.893	4809902.864	2563651.292	1599973.747	3734857.761	9411891.32	1613535.538	2249577.235	1322048.05	1809748.029	1395108.709	1174430.691	6027228.845	12322264.664
colon-686-ATB_81	37936935.445	2508.197	5059.103	8479459.437	26646.888	10404535.426	399374.053	165225580.214	3060289.838	131117117.275	9018.585	501224.956	38407025.397	11743121.04	4288668.204	129072597.442	8780826.337	687899.246	20468.786	41244053.277	1081034.166	3139559.562	39887782.986	137244600.126	853487.715	32420529.09	1731050.993	17773869.344	84781889.64	4067113.865	590606.224	13269777.12	9451.665	46791717.55	738164.075	856694.295	2573576.481	2613846.345	1397581.71	3090469.604	1552915.075	2984616.514	1322121.104	991123.906	533483.128	802087.746	1237058.658	35066528.667	5917362.664
colon-676-FMT-AKK-Pas_71	27277007.361	32542.951	10934.85	154743.203	6020.976	4703347.075	180147.648	6499148.421	299373.557	36605378.986	51074.562	1853974.062	13079415.201	61313545.758	5209172.004	62741978.614	11103.742	4303875.931	29100.693	42619983.995	142494.498	1369885.526	31471473.131	43987341.033	126092.615	9357550.457	432900.849	32528799.29	119159662.888	19732312.286	3171215.459	13833232.708	22922.23	22758168.76	4177.906	NA	54201.545	2615374.27	448231.294	177211.217	365537.624	NA	481688.414	252187.638	249488.123	406385.95	421808.786	2226686.378	928382.556
colon-682-FMT_77	28076693.892	16828.959	2375.488	7066255.597	7032.134	21388937.519	968748.444	95401509.049	2186982.912	297723820.29	7082.955	1635191.683	37807835.767	140747476.515	8835537.183	387921566.049	28081.079	3925889.688	47882.563	48513220.539	390941.322	3765142.865	39957337.03	25233159.373	964874.431	76119478.66	2237866.249	30653012.329	220685984.508	740430.92	3832292.846	33904189.835	35599.18	57548545.772	7191.571	2490.886	11220.57	2725562.738	120526.172	15503.801	22480.069	NA	297111.94	100279.618	446911.321	506294.714	233868.623	4752012.182	6540742.926
colon-688-ATB_83	38300697.421	1672.105	2982.975	35742625.166	7043.521	9293657.091	303371.699	217531966.323	2799823.683	103861906.291	3688.543	223307.678	30338743.389	4118004.697	3154009.722	150047798.303	9957341.12	334891.904	28165.476	16558378.609	695841.83	4760726.431	46883392.861	95682460.694	286177.848	11530030.922	1965470.749	14520343.521	114503406.198	2726914.326	16956.769	12402176.585	7337.018	45710016.582	411472.53	516585.062	1799372.503	2705080.221	1604034.181	2972993.427	820023.17	2603422.546	1724288.519	1184333.459	390202.165	898193.375	1419768.276	29097366.605	2638134.968
colon-687-SPF_82	9452517.284	12897.126	2601.181	3905862.36	7915.418	9043049.65	762540.102	62641590.29	1781076.697	245821663.362	6930.148	1184095.253	24160362.131	64789443.047	6348573.148	299624493.49	24413.617	4471590.128	24633.072	18175780.461	99067.278	3360186.523	94911211.197	41443466.483	422502.755	97925283.812	1579955.612	28799341.141	123821023.393	4469788.851	5220120.533	2103938.66	17284.542	31545672.218	9135.047	3400.84	60269.341	2493342.377	498061.931	184549.354	200449.672	34001.718	686461.462	252556.296	416194.943	806496.898	465498.423	4730662.868	7873566.162
colon-679-FMT-AKK_74	25265936.831	5403.818	5654.289	7261642.899	5556.366	19158665.411	495667.611	26089597.726	795813.211	106408858.54	15804.519	1000005.427	35700014.267	58478415.589	1383243.166	297253397.081	52943.031	2763604.13	37472.791	35631061.048	162743.962	4571395.027	187456396.456	216395591.65	229024.708	16561942.639	2178405.105	23422051.281	148288302.227	13995920.993	1481298.755	48786669.65	13570.503	101439396.197	965645.876	1022625.342	2809288.515	2536880.949	1459721.863	3042561.409	7277739.375	1552371.78	2103656.455	1156153.831	2127802.952	1191084.42	1310171.464	4668305.941	11647549.242
colon-673-FMT-AKK-Pas_68	14639358.183	37399.131	22933.263	26272704.458	4694.403	16366608.716	536206.296	29170216.403	1266192.543	167391829.127	35703.784	710455.011	22898711.411	47132436.709	2327758.199	225175839.559	26178.269	2745262.663	37801.368	32213508.83	55568.284	5622568.364	70087506.702	80039778.914	508914.994	40433228.778	2633122.669	28373036.242	167801858.913	11631827.022	1525842.287	35435741.87	17720.928	76035092.559	208932.985	207505.229	908223.309	2719471.005	400532.298	663831.788	2163793.028	156963.483	250859.286	232827.152	315938.215	183191.045	160885.416	3588610.676	9311796.315
colon-691-ATB_86	31455249.679	1571.041	3061.561	40064870.533	7496.154	7575426.911	212161.46	191277105.899	2058671.326	111390192.943	2277.317	194197.486	14646910.15	2066655.574	2618402.946	92713726.644	5066650.786	410705.389	30910.713	9509733.179	1108118.582	3262860.06	36077981.883	85511348.972	115589.999	9435313.615	1647778.484	27753190.62	126298629.154	3315822.303	5806.228	6444783.661	7752.929	27885082.872	530472.883	640907.501	1631802.379	2615360.911	1173672.191	3005541.567	1053541.461	3772311.473	1093256.168	1029873.634	231085.135	764763.396	1703079.638	13412670.45	1249287.554
colon-678-FMT_73	33505240.803	26101.807	3468.786	18219571.166	12159.478	21752569.511	693575.002	105959952.184	1940495.078	243582603.864	4833.956	1508223.744	22446464.76	133245515.15	5583787.289	199156349.078	12213.329	3181918.51	42715.841	29861055.316	191109.132	4766379.053	127623422.572	24328160.25	241880.016	28750901.375	2958670.481	20744786.971	126090596.09	1499585.407	3404491.998	36402382.135	22587.258	38938412.076	NA	4953.131	28124.68	2872507.354	476141.341	215212.034	41124.589	NA	786916.153	599196.505	820834.816	1269152.748	860883.495	3404076.866	445275.759
colon-677-FMT-AKK-Pas_72	15956285.982	18558.157	12648.339	854398.14	7628.556	3863824.024	215497.623	9768062.703	227310.078	37384881.3	10299.467	1724121.031	14532928.6	68546163.347	8891794.72	141364201.69	9939.608	2918825.479	36371.6	37891138.656	94302.359	1282683.148	46919987.762	31353041.056	110171.424	9734320.761	800438.581	31159434.643	133594635.703	12231393.882	2865100.378	17104519.546	21213.658	22890473.978	2461.189	2336.821	26476.764	2872517.897	371501.941	153741.294	67778.243	11754.539	499733.694	176501.147	263483.489	422508.981	405554.683	1986939.723	3476346.589
colon-693-SPF_88	34722976.609	14594.834	15403.643	847152.087	1672.234	16572806.42	348000.978	55199306.122	392512.916	42006506.334	7875.391	716473.89	43770409.82	NA	12791129.806	173347724.844	37673.767	5159943.754	81165.315	7749020.605	261966.865	5526255.63	182835195.642	23889798.777	196215.086	8760313.472	2857030.138	27420543.618	152121871.677	6073625.57	1518783.331	39340405.885	9944.532	44762313.732	59330.028	NA	153367.774	3119502.99	741210.617	673477.28	246888.722	344511.171	4952672.161	829237.74	1895467.014	4778545.814	1541819.485	10341803.75	NA
colon-672-FMT-AKK_67	28176257.756	6645.977	3670.386	41373924.439	11837.309	28450299.163	791588.87	29809062.113	1503218.3	209661385.481	50614.654	978121.087	41746488.471	39238617.893	2159726.357	329540840.977	40339.721	3487601.402	41755.027	38639283.673	155778.544	6787384.192	136437432.475	189667807.161	658757.679	35449044.399	2914333.07	23893694.164	151923012.814	11976501.695	2214330.432	37247358.17	16539.435	79298687.102	1650698.109	1336378.358	2592130.11	2657572.762	1402650.373	3931718.714	6015386.647	1819469.244	1765305.343	1971575.981	1962343.759	1699386.128	1692550.495	6023859.266	24264721.52
colon-694-ATB_89	36648164.356	1945.038	2737.366	14529668.139	9023.227	8342780.615	329551.764	231528754.22	3224288.876	126211275.093	1869.205	200392.116	25705455.801	3681761.123	4459192.723	119032061.236	5376381.811	142849.15	30939.285	15268640.029	681424.635	3969100.392	28968828.914	89016119.362	246023.012	16679595.958	2088381.487	18415843.931	127515519.241	1406430.621	22828.161	8676177.085	8428.71	36357721.099	567426.542	652668.679	1717549.805	2863759.112	1899430.606	3767393.85	941564.082	3717816.713	1697922.813	1416113.986	344131.662	1009782.816	1807749.142	16752806.76	1389197.253
colon-671-FMT-AKK-Pas_66	15375190.206	24937.898	8787.133	480079.828	8509.675	6947652.767	364837.601	4961403.239	1989120.011	82528207.365	26954.629	1283284.883	30860200.097	83238225.766	9832468.408	130035924.078	12197.013	4182933.574	53214.637	34932151.241	8438.552	5104226.301	130207624.731	39854283.771	132058.408	5554256.213	1724868.809	29670486.32	111688536.623	8608929.584	2251856.624	27435586.395	17611.496	30654122.613	21808.743	3891.244	93041.812	2580696.733	640153.617	643292.765	78119.247	77351.643	2685342.321	770839.022	956237.358	2312163.262	1211523.976	3803068.105	16684416.466
colon-695-SPF_90	28937360.982	6141.379	5209.635	369868.782	2342.933	13390899.219	336802.496	41594129.658	472214.264	59162872.163	19588.704	605623.669	46100018.411	NA	11982617.076	227399122.246	42033.124	8054560.637	71446.205	19793857.638	301107.679	4862478.044	126123348.752	22342424.502	282452.06	28240207.316	2443021.089	27473140.703	135254600.243	9692303.174	1804068.125	29807220.531	11982.378	33497735.645	556818.984	128846.461	855960.812	2635433.987	2275213.337	2859422.966	1001960.475	1066763.869	3048953.302	2174558.086	1452095.646	3107677.417	2304718.777	7460502.952	5616284.666
colon-674-FMT-AKK_69	16667154.147	17862.325	15697.937	832854.302	10316.387	13922426.174	472453.647	19185433.458	721929.367	72006587.018	11200.43	1297370.039	39046281.084	38953759.39	1236461.811	194459420.2	55575.888	4409172.969	35104.226	73788388.847	235050.078	5907086.798	155931839.41	175599501.122	471500.453	22960931.772	2015320.642	23746537.431	87263821.361	29205598.544	1264006.782	56414656.18	18863.912	86925233.626	1205714.617	610289.296	2763275.496	2649654.408	1601594.812	3790660.03	7052598.826	1787741.05	2829513.649	1218696.208	NA	1569402.746	870331.265	5454165.605	18319487.07
colon-669-FMT_64	29169920.717	28620.683	2023.245	2957476.568	22502.83	30607149.091	1278080.871	42954758.925	2189766.701	281809908.114	4655.527	1196305.526	39352821.277	184054512.683	16079223.686	349224632.941	86000.525	1461786.83	30557.844	92050069.43	682682.057	3714729.441	71870975.701	25314335.221	2026608.377	62740886.997	1868441.31	31101267.378	192359334.996	716615.019	5022103.54	8503289.329	34299.658	70729743.8	13331.446	NA	12611.851	2601165.865	501846.517	54950.437	49796.285	42248.999	389283.439	142645.471	298690.379	534508.754	277223.889	5246119.736	3009202.706
St_mix_pre	NA	427986.481	303103.928	NA	190903.458	NA	NA	NA	NA	NA	NA	169419.997	NA	NA	NA	NA	NA	NA	NA	NA	NA	NA	NA	NA	NA	NA	NA	NA	NA	NA	156952.344	50440.932	414541.714	NA	NA	NA	NA	NA	NA	NA	NA	NA	NA	NA	NA	NA	NA	NA	NA
St_BA1_pre	NA	NA	NA	NA	NA	NA	NA	NA	NA	NA	435791.099	NA	NA	NA	NA	NA	NA	11989.322	NA	NA	NA	NA	NA	NA	NA	NA	NA	NA	NA	13225.886	NA	NA	NA	NA	NA	NA	NA	NA	NA	NA	NA	NA	NA	NA	NA	NA	NA	NA	NA
St_AA_pre	NA	NA	NA	148369.128	NA	NA	163.11	19691018.699	12845.553	1401570.466	NA	NA	NA	NA	1806.476	25297099.381	17.334	NA	209.029	8990.907	476.394	NA	NA	NA	107.09	1701383.659	NA	7404893.136	112688972.417	NA	NA	NA	NA	NA	NA	NA	NA	NA	NA	NA	NA	NA	NA	NA	NA	NA	NA	NA	NA
St_BA2_pre	NA	NA	NA	NA	NA	NA	NA	NA	NA	NA	898.631	NA	NA	NA	NA	NA	NA	4387.164	NA	NA	NA	NA	NA	NA	NA	NA	NA	NA	NA	1177824.024	NA	NA	NA	NA	NA	NA	NA	NA	NA	NA	NA	NA	NA	NA	NA	NA	NA	NA	NA
St_AA_post	NA	NA	NA	0	NA	NA	19561.197	0	541721341894515	1155784.421	NA	NA	NA	NA	0.001	41410134343411392	1.38980701442602e+27	NA	0	8.48978352305807e+34	1.43490066492741e+25	NA	NA	NA	1.42629791571661e+51	3179450673553841152	NA	648057577466.364	16427.331	NA	NA	NA	NA	NA	NA	NA	NA	NA	NA	NA	NA	NA	NA	NA	NA	NA	NA	NA	NA
St_BA2_post	NA	NA	NA	NA	NA	NA	NA	NA	NA	NA	1087.411	NA	NA	NA	NA	NA	NA	7331.635	NA	NA	NA	NA	NA	NA	NA	NA	NA	NA	NA	1332579.667	NA	NA	NA	NA	NA	NA	NA	NA	NA	NA	NA	NA	NA	NA	NA	NA	NA	NA	NA
St_BA1_post	NA	NA	NA	NA	NA	NA	NA	NA	NA	NA	462198.494	NA	NA	NA	NA	NA	NA	39852.532	NA	NA	NA	NA	NA	NA	NA	NA	NA	NA	NA	8963.483	NA	NA	NA	NA	NA	NA	NA	NA	NA	NA	NA	NA	NA	NA	NA	NA	NA	NA	NA
[truncated: 186 more columns]

## Sheet: AreaCorrLog2Cen
Sid	2-deoxycytidine@1.43-qppos	2-hydroxy-3-methylbutyric acid@4.58-sf	2-hydroxybutyric acid@2.49-sf	2-oxoglutaric acid@13.19-gc	3-hydroxybutyric acid@1.66-sf	3-methylhistidine@0.99-qppos	4-hydroxymandelic acid@15.38-gc	4-hydroxyproline@12.60-gc	5-aminovaleric acid@13.70-gc	5-oxoproline@12.53-gc	7,12-dihydroxy-3-oxocholanoic acid@7.12-ba	Acetic acid@1.78-sf	Acetylcarnitine@1.23-qppos	Acetylcholine@1.07-qppos	Adenine@16.39-gc	Alanine@7.03-gc	Allantoin@16.73-gc	Alpha-muricholic acid@5.96-ba	Alpha-tocopherol@29.54-gc	Arabinose@14.34-gc	Arabitol@15.04-gc	Arachidic acid@23.82-qpneg	Arachidonic acid@20.30-qpneg	Arginine@0.98-qppos	Asparagine@14.30-gc	Aspartic acid@12.54-gc	Behenic acid@25.11-qpneg	Benzoic acid@8.93-gc	Beta-alanine@11.33-gc	Beta-muricholic acid@6.26-ba	Butanoic acid@5.27-sf	Cadaverine@4.61-pa	Caproic acid@12.07-sf	Carnitine@1.02-qppos	Carnitine C10:0@12.39-qppos	Carnitine C10:1@11.60-qppos	Carnitine C12:0@13.80-qppos	Carnitine C12:1@10.69-qppos	Carnitine C14:0@15.86-qppos	Carnitine C14:1@14.94-qppos	Carnitine C14:1(OH)@13.51-qppos	Carnitine C14:2@14.08-qppos	Carnitine C16:0@17.59-qppos	Carnitine C16:1@16.41-qppos	Carnitine C18:0@19.49-qppos	Carnitine C18:1@18.07-qppos	Carnitine C18:2@17.04-qppos	Carnitine C3:0@1.59-qppos	Carnitine C4:0@2.66-qppos
BlM_pre	NA	-5.49	-5.391	-11.315	-3.681	-6.383	-13.866	-11.78	-8.951	-8.246	-5.469	-5.772	-9.27	NA	-14.047	-8.994	-11.669	-6.871	-6.154	-12.646	-10.245	-2.427	-7.608	-5.486	-7.108	-14.42	-4.696	-2.495	-0.316	-11.855	-8.635	-5.911	-1.305	-7.927	-4.983	NA	NA	0.582	-1.706	NA	NA	NA	NA	NA	NA	NA	-8.136	NA	NA
BlM_post	NA	-6.977	-6.182	-12.768	-4.232	-7.392	-3.517	-5.165	-7.245	-3.074	-5.417	-5.535	-10.234	-8.764	-4.643	-7.574	-5.496	-9.854	-9.095	-9.454	-5.546	-2.314	-6.395	-5.526	-4.998	-5.343	-4.697	-1.713	-0.255	-10.829	-7.855	-8.088	-2.31	-8.042	-5.137	NA	NA	0.581	-2.264	NA	NA	NA	NA	NA	NA	NA	-7.487	NA	NA
QC_colon_4a	0.049	0.961	0.795	NA	0.203	0.085	NA	NA	NA	NA	NA	0.39	0.18	0.938	NA	NA	NA	NA	NA	NA	NA	0.249	0.346	0.428	NA	NA	0.298	NA	NA	NA	1.234	0.437	0.448	0.123	1.774	2.151	1.165	-0.132	0.346	1.131	1.713	0.931	0.367	0.58	0.604	0.406	0.308	0.523	1.013
QC_colon_5a	NA	NA	NA	0.685	NA	NA	0.003	0.076	0.49	0.053	NA	NA	NA	NA	-0.144	0.687	4.199	NA	0.111	0.971	0.644	NA	NA	NA	0.633	0.753	NA	0.326	0.057	NA	NA	NA	NA	NA	NA	NA	NA	NA	NA	NA	NA	NA	NA	NA	NA	NA	NA	NA	NA
QC_colon_4b	0.101	0.95	0.8	NA	0.4	0.202	NA	NA	NA	NA	NA	0.397	0.165	0.943	NA	NA	NA	NA	NA	NA	NA	0.237	0.371	0.47	NA	NA	0.037	NA	NA	NA	1.365	0.474	0.518	0.071	1.868	2.304	1.408	0.084	0.387	1.059	1.826	0.897	0.552	0.428	0.514	0.31	0.204	0.433	0.921
QC_colon_5b	NA	NA	NA	0.217	NA	NA	0.457	0.028	0.859	0.315	0.624	NA	NA	NA	0.334	0.856	4.333	0.562	0.037	1.458	0.956	NA	NA	NA	2.07	1.024	NA	0.42	0.07	0.601	NA	NA	NA	NA	NA	NA	NA	NA	NA	NA	NA	NA	NA	NA	NA	NA	NA	NA	NA
QC_colon_4c	-0.011	0.975	0.811	NA	0.386	0.089	NA	NA	NA	NA	NA	0.396	0.092	0.907	NA	NA	NA	NA	NA	NA	NA	0.256	0.269	0.385	NA	NA	0.052	NA	NA	NA	1.236	0.421	0.538	0.079	1.77	2.177	2.064	-0.054	0.365	1.027	1.709	0.79	0.464	0.327	0.545	0.355	0.18	0.344	0.969
QC_colon_5c	NA	NA	NA	2.1	NA	NA	0.389	1.213	0.196	0.416	0.709	NA	NA	NA	0.635	0.653	4.121	0.565	0.173	0.298	1.018	NA	NA	NA	0.551	0.619	NA	0.227	0.121	0.627	NA	NA	NA	NA	NA	NA	NA	NA	NA	NA	NA	NA	NA	NA	NA	NA	NA	NA	NA
QC_colon_5e	NA	NA	NA	0.361	NA	NA	0.769	0.509	0.68	0.694	0.711	NA	NA	NA	0.737	0.664	4.83	0.506	0.344	1.271	0.898	NA	NA	NA	1.848	1.004	NA	0.562	0.243	0.596	NA	NA	NA	NA	NA	NA	NA	NA	NA	NA	NA	NA	NA	NA	NA	NA	NA	NA	NA
QC_colon_4d	0.03	1.001	0.812	NA	0.216	0.192	NA	NA	NA	NA	NA	0.407	0.144	0.969	NA	NA	NA	NA	NA	NA	NA	0.297	0.363	0.473	NA	NA	0.231	NA	NA	NA	1.205	0.474	0.499	0.148	1.763	2.358	1.625	0.028	0.459	1.101	1.825	0.944	0.522	0.438	0.587	0.324	0.211	0.436	0.966
QC_colon_5d	NA	NA	NA	-0.328	NA	NA	0.389	-0.102	0.74	0.336	0.696	NA	NA	NA	0.188	0.873	4.86	0.823	-0.027	1.572	1.275	NA	NA	NA	2.139	1.072	NA	0.485	0.047	0.63	NA	NA	NA	NA	NA	NA	NA	NA	NA	NA	NA	NA	NA	NA	NA	NA	NA	NA	NA
QC_colon_4e	0.082	0.922	0.782	NA	0.232	0.112	NA	NA	NA	NA	NA	0.388	0.14	0.891	NA	NA	NA	NA	NA	NA	NA	0.359	0.317	0.403	NA	NA	0.279	NA	NA	NA	1.303	0.504	0.489	0.016	1.88	2.137	1.594	-0.002	0.293	1.008	1.724	0.792	0.476	0.382	0.483	0.342	0.206	0.392	0.927
QC_colon_5f	NA	NA	NA	NA	NA	NA	NA	NA	NA	NA	0.705	NA	NA	NA	NA	NA	NA	0.579	NA	NA	NA	NA	NA	NA	NA	NA	NA	NA	NA	0.615	NA	NA	NA	NA	NA	NA	NA	NA	NA	NA	NA	NA	NA	NA	NA	NA	NA	NA	NA
colon-666-FMT_61	-0.836	0.871	-1.377	-1.357	-0.492	0.13	0.39	-0.657	1.032	0.741	-0.616	0.478	-0.144	1.737	0.011	1.24	-1.146	0.434	-0.154	1.06	-0.013	-0.358	-0.294	-1.646	3.222	2.179	-0.602	0.379	0.187	-1.362	1.688	0.423	0.948	-0.178	-5.379	-4.595	-4.701	-0.147	-2.503	-5.849	-3.94	NA	-1.642	-1.726	-0.775	-0.731	-1.449	-1.232	-1.993
colon-667-FMT-AKK-Pas_62	0.408	2.422	2.847	-5.032	0.473	-0.332	-0.948	-2.661	-1.474	-1.74	1.564	0.892	0.771	1.285	0.02	0.163	-1.439	0.424	-0.415	1.594	-1.095	-0.193	0.189	0.207	1	-0.558	-0.345	-0.359	-0.852	1.433	1.189	0.808	0.207	-0.018	0.982	0.028	0.449	-0.081	0.122	0.249	-0.728	-0.269	0.417	0.36	0.512	0.233	0.468	-0.189	2.299
colon-684-SPF_79	-0.586	-2.086	-0.263	-4.364	-1.858	-0.396	-0.878	-1.357	-1.023	-1.442	-0.245	0.633	-0.423	NA	1.095	-0.041	-1.659	1.562	0.231	0.779	0.76	0.043	1.227	-1.38	0.217	-0.157	0.257	0.242	-0.121	0.784	1.483	0.142	-0.355	-1.192	-3.827	NA	-2.328	0.012	-0.737	-1.517	-2.336	-3.718	-0.115	-1.171	0.335	0.213	-0.064	-0.058	-1.249
colon-668-FMT-AKK_63	NA	-0.922	-1.873	1.729	0.738	1.678	1.213	-1.292	1.385	1.34	3.581	-0.003	0.214	0.695	-1.538	1.41	-0.496	0.618	-0.638	2.258	1.319	0.227	0.563	2.485	2.541	1.444	0.584	0.407	0.69	1.315	0.971	-0.151	-0.353	1.516	2.819	3.63	3.276	-0.159	0.28	1.617	3.459	0.688	0.237	0.951	1.005	0.179	-0.25	-0.285	1.902
colon-690-ATB_85	0.457	-2.105	-0.672	1.285	0.408	-0.845	-1.221	1.507	1.279	-0.092	-3.074	-1.428	-1.132	-3.422	-1.116	-0.004	7.325	-2.37	-1.258	0.308	2.026	-1.029	-2.647	0.56	1.417	-0.015	-1.256	0.055	-0.307	-0.585	-3.494	-0.649	-0.857	-0.773	1.643	2.283	2.522	0.021	-0.007	1.281	0.512	2.271	-1.402	-0.324	-2.76	-1.248	0.046	-0.028	-3.065
colon-681-FMT-AKK-Pas_76	0.455	3.17	1.941	-4.009	0.181	-0.359	0.256	-2.439	-0.331	-0.949	2.24	0.631	0.979	1.352	0.493	0.797	0.88	0.503	-0.112	1.193	0.71	-1.321	-0.348	-0.027	0.965	0.683	-1.487	0.215	-0.161	1.729	0.55	0.746	0.689	0.713	0.311	-3.254	-1.344	0.053	-0.223	-1.058	-0.937	-1.492	0.401	-0.613	0.23	-0.205	-0.905	0.066	2.178
colon-670-FMT_65	-1.32	0.279	0.018	-4.995	-0.806	-1.325	-1.186	-2.834	-0.814	-1.175	-1.114	0.375	0.1	0.864	0.47	0.036	-1.006	-0.254	-0.779	0.905	0.06	0.212	0.048	-2.432	0.854	0.614	0.459	0.282	-0.221	-0.6	0.797	0.405	-0.046	-0.391	-1.781	-4.238	-0.333	0.206	0.058	-0.61	-1.139	-2.253	-0.072	-0.349	0.012	0.179	0.061	-0.727	0.798
colon-685-SPF_80	-0.06	-4.815	-2.026	-0.216	-1.544	0.65	1.123	0.325	0.735	1.102	0.991	0.801	-0.017	2.082	0.669	0.889	-1.971	1.801	0.213	0.598	1.848	-0.421	0.627	-0.813	1.802	0.312	-0.578	0.465	-0.023	0.2	2.197	-3.096	0.377	-0.528	NA	-3.648	-5.623	0.091	-2.664	-3.308	-3.51	NA	-3.08	-4.517	-1.347	-1.908	-2.409	0.241	-4.505
colon-675-FMT-AKK_70	-0.575	-0.216	1.553	-0.058	-0.512	-0.207	0.31	-2.567	-0.041	-0.03	0.918	0.085	0.12	-1.485	-2.08	0.78	-0.447	0.126	-0.377	0.981	-0.499	0.019	-0.583	1.139	1.296	1.163	0.237	0.348	0.139	0.97	0.542	0.874	-0.156	0.929	3.17	3.437	2.945	0.144	0.086	1.564	3.293	0.985	-0.273	-0.069	0.328	-0.654	-0.755	-0.121	1.394
colon-692-ATB_87	0.163	-2.701	-0.967	1.137	-0.379	-1.046	-1.331	1.545	1.218	-0.342	-3.053	-1.567	-1.39	-4.39	-1.335	-0.47	6.867	-3.074	-1.345	0.002	1.452	-0.547	-2.525	0.291	0.505	-0.527	-1.154	-0.043	-0.175	-1.17	-6.633	-0.958	-1.404	-1.247	1.525	2.645	2.311	-0.007	-0.13	1.106	0.078	2.128	-1.353	-0.541	-3.273	-1.545	0.07	0.248	-2.988
colon-683-FMT_78	0.051	2.388	2.814	-5.902	-0.551	-0.559	-2.489	-1.056	-2.2	-1.988	2.088	1.048	-0.541	0.734	-0.095	-0.275	-3.313	-0.087	-1.041	0.021	-0.761	-0.014	0.284	-0.999	-1.511	-0.359	0.054	-0.274	-0.756	0.062	1.517	0.728	0.043	-0.602	-1.346	-3.324	-1.259	0.035	0.246	-0.794	-0.204	-2.271	0.17	0.106	0.513	0.256	0.519	-1.136	1.116
colon-689-SPF_84	NA	-2.318	-1.718	0.464	-0.045	0.653	1.038	-1.422	0.437	1.947	-1.159	0.154	0.18	2.21	-0.092	-2.273	-2.822	0.498	0.721	0.485	1.364	0.789	1.181	-0.449	0.259	-0.717	0.503	-0.186	-0.52	-1.044	2.339	-2.734	0.608	-0.196	-3.754	-4.274	-2.93	-0.091	-0.132	-0.35	NA	-0.908	0.204	-0.672	0.198	0.464	-0.383	0.538	-2.562
colon-680-FMT-AKK_75	-0.591	-0.333	0.136	-0.516	-0.281	0.06	0.442	-1.672	-1.334	-0.624	0.976	-0.003	0.282	-0.899	-2.049	0.44	-1.271	0.644	0.465	1.065	-0.686	0.948	0.815	0.188	-0.013	-0.667	0.896	0.291	-0.02	1.706	-0.195	1.221	-0.047	0.883	3.602	3.739	4.191	-0.072	1.279	2.673	4.359	1.937	1.313	1.563	1.836	0.77	0.775	0.046	1.764
colon-686-ATB_81	0.757	-1.587	-0.148	2.31	2.084	-0.112	0.049	2.728	1.404	0.414	-0.339	-0.805	0.486	-1.609	0.145	-0.675	6.475	-1.653	-0.61	-0.148	1.894	-0.213	-0.835	1.4	0.653	0.377	0.054	-0.608	-0.522	-0.544	-0.778	-0.388	-0.69	0.113	2.933	3.83	3.289	-0.044	1.084	2.4	1.76	2.825	0.546	1.147	0.074	-0.029	0.85	2.587	0.705
colon-676-FMT-AKK-Pas_71	0.281	2.11	0.964	-3.466	-0.062	-1.257	-1.1	-1.94	-1.949	-1.427	2.163	1.082	-1.068	0.775	0.425	-1.716	-3.152	0.992	-0.102	-0.101	-1.029	-1.41	-1.176	-0.241	-2.106	-1.416	-1.946	0.264	-0.031	1.734	1.646	-0.328	0.588	-0.927	-4.532	NA	-2.281	-0.043	-0.557	-1.725	-0.327	NA	-0.911	-0.827	-1.022	-1.01	-0.702	-1.39	-1.967
colon-682-FMT_77	0.322	1.159	-1.239	2.047	0.162	0.928	1.327	1.936	0.92	1.597	-0.687	0.901	0.464	1.974	1.187	0.913	-1.814	0.86	0.616	0.086	0.427	0.049	-0.832	-1.043	0.83	1.608	0.424	0.179	0.858	-3.002	1.92	0.965	1.223	0.412	-3.749	-4.596	-4.553	0.016	-2.452	-5.239	-4.35	NA	-1.608	-2.158	-0.181	-0.693	-1.553	-0.297	0.85
colon-688-ATB_83	0.77	-2.172	-0.91	4.385	0.165	-0.275	-0.348	3.125	1.276	0.078	-1.629	-1.971	0.146	-3.121	-0.299	-0.458	6.656	-2.692	-0.149	-1.465	1.259	0.388	-0.601	0.88	-0.923	-1.114	0.237	-0.899	-0.089	-1.121	-5.901	-0.486	-1.055	0.079	2.09	3.1	2.772	0.005	1.282	2.344	0.839	2.627	0.929	1.404	-0.377	0.134	1.049	2.318	-0.46
colon-687-SPF_82	-1.248	0.775	-1.108	1.191	0.333	-0.314	0.982	1.329	0.623	1.321	-0.719	0.436	-0.182	0.855	0.711	0.54	-2.016	1.048	-0.343	-1.33	-1.554	-0.115	0.416	-0.327	-0.361	1.972	-0.078	0.089	0.024	-0.408	2.366	-3.045	0.181	-0.456	-3.404	-4.147	-2.127	-0.112	-0.405	-1.666	-1.194	-3.631	-0.4	-0.825	-0.284	-0.021	-0.56	-0.303	1.117
colon-679-FMT-AKK_74	0.17	-0.48	0.013	2.086	-0.177	0.769	0.361	0.065	-0.539	0.113	0.47	0.192	0.381	0.707	-1.488	0.528	-0.899	0.353	0.263	-0.359	-0.838	0.329	1.398	2.057	-1.245	-0.592	0.386	-0.21	0.284	1.239	0.548	1.49	-0.168	1.23	3.32	4.086	3.415	-0.087	1.146	2.377	3.988	1.882	1.216	1.369	2.07	0.541	0.933	-0.322	1.682
colon-673-FMT-AKK-Pas_68	-0.617	2.311	2.033	3.941	-0.421	0.542	0.474	0.227	0.131	0.766	1.646	-0.301	-0.26	0.396	-0.737	0.128	-1.915	0.344	0.275	-0.505	-2.388	0.628	-0.021	0.622	-0.093	0.696	0.659	0.067	0.463	0.972	0.591	1.029	0.217	0.814	1.112	1.784	1.786	0.013	-0.719	0.181	2.238	-1.424	-1.852	-0.943	-0.682	-2.159	-2.093	-0.702	1.359
colon-691-ATB_86	0.486	-2.262	-0.872	4.55	0.255	-0.57	-0.864	2.94	0.832	0.179	-2.324	-2.173	-0.904	-4.116	-0.567	-1.152	5.682	-2.397	-0.015	-2.265	1.93	-0.157	-0.979	0.718	-2.231	-1.404	-0.017	0.035	0.053	-0.839	-7.447	-1.43	-0.976	-0.634	2.456	3.411	2.631	-0.043	0.832	2.359	1.2	3.163	0.272	1.203	-1.133	-0.098	1.311	1.2	-1.539
colon-678-FMT_73	0.577	1.792	-0.692	3.413	0.952	0.952	0.845	2.087	0.747	1.308	-1.239	0.785	-0.288	1.895	0.525	-0.049	-3.015	0.557	0.452	-0.614	-0.606	0.389	0.843	-1.096	-1.166	0.204	0.827	-0.385	0.05	-1.984	1.749	1.068	0.567	-0.152	NA	-3.604	-3.227	0.092	-0.47	-1.444	-3.479	NA	-0.203	0.421	0.696	0.633	0.327	-0.778	-3.027
colon-677-FMT-AKK-Pas_72	-0.493	1.3	1.174	-1.001	0.28	-1.541	-0.841	-1.352	-2.347	-1.396	-0.147	0.978	-0.916	0.936	1.197	-0.544	-3.312	0.432	0.22	-0.271	-1.625	-1.504	-0.6	-0.73	-2.3	-1.359	-1.059	0.202	0.134	1.044	1.5	-0.022	0.476	-0.918	-5.296	-4.688	-3.314	0.092	-0.828	-1.93	-2.758	-5.164	-0.858	-1.342	-0.944	-0.954	-0.759	-1.554	-0.062
colon-693-SPF_88	0.629	0.954	1.458	-1.014	-1.91	0.56	-0.15	1.147	-1.559	-1.228	-0.534	-0.289	0.675	NA	1.721	-0.25	-1.39	1.254	1.378	-2.56	-0.151	0.603	1.362	-1.122	-1.468	-1.511	0.777	0.018	0.321	0.034	0.584	1.18	-0.617	0.049	-0.704	NA	-0.78	0.211	0.169	0.202	-0.893	-0.29	2.451	0.89	1.903	2.546	1.168	0.825	NA
colon-672-FMT-AKK_67	0.327	-0.181	-0.611	4.596	0.914	1.339	1.036	0.258	0.379	1.091	2.15	0.16	0.607	0.131	-0.845	0.677	-1.291	0.689	0.419	-0.242	-0.901	0.899	0.94	1.867	0.28	0.506	0.805	-0.181	0.319	1.014	1.128	1.101	0.117	0.874	4.094	4.472	3.299	-0.02	1.089	2.747	3.714	2.111	0.963	2.139	1.953	1.054	1.303	0.046	2.741
colon-694-ATB_89	0.707	-1.954	-1.034	3.087	0.522	-0.431	-0.228	3.215	1.48	0.359	-2.609	-2.127	-0.093	-3.283	0.201	-0.792	5.767	-3.921	-0.014	-1.582	1.228	0.125	-1.296	0.776	-1.141	-0.582	0.325	-0.556	0.067	-2.076	-5.472	-1.001	-0.855	-0.251	2.553	3.438	2.705	0.088	1.526	2.685	1.038	3.142	0.907	1.662	-0.558	0.303	1.398	1.521	-1.385
colon-671-FMT-AKK-Pas_66	-0.546	1.726	0.649	-1.833	0.438	-0.695	-0.082	-2.329	0.783	-0.254	1.241	0.552	0.171	1.216	1.342	-0.664	-3.017	0.951	0.769	-0.388	-5.107	0.488	0.872	-0.384	-2.039	-2.168	0.049	0.132	-0.124	0.538	1.153	0.66	0.208	-0.497	-2.148	-3.952	-1.501	-0.063	-0.043	0.135	-2.553	-2.445	1.568	0.785	0.916	1.498	0.82	-0.618	2.201
colon-695-SPF_90	0.366	-0.295	-0.106	-2.209	-1.423	0.252	-0.197	0.738	-1.292	-0.734	0.78	-0.532	0.75	NA	1.627	0.142	-1.232	1.897	1.194	-1.207	0.05	0.418	0.826	-1.219	-0.942	0.178	0.551	0.021	0.152	0.709	0.833	0.779	-0.348	-0.369	2.526	1.097	1.701	-0.032	1.787	2.288	1.128	1.34	1.751	2.281	1.519	1.925	1.748	0.354	0.63
colon-674-FMT-AKK_69	-0.43	1.245	1.486	-1.038	0.715	0.308	0.291	-0.378	-0.68	-0.451	-0.026	0.567	0.51	0.121	-1.65	-0.084	-0.829	1.027	0.168	0.691	-0.307	0.699	1.132	1.756	-0.203	-0.121	0.273	-0.19	-0.481	2.3	0.319	1.7	0.307	1.007	3.641	3.341	3.391	-0.025	1.28	2.694	3.943	2.085	1.644	1.445	NA	0.939	0.343	-0.098	2.336
colon-669-FMT_64	0.377	1.925	-1.47	0.79	1.84	1.445	1.727	0.785	0.921	1.518	-1.293	0.45	0.521	2.361	2.051	0.761	-0.199	-0.566	-0.032	1.01	1.231	0.03	0.015	-1.038	1.901	1.33	0.164	0.2	0.66	-3.049	2.31	-1.03	1.17	0.709	-2.858	NA	-4.384	-0.051	-0.394	-3.414	-3.203	-3.318	-1.218	-1.649	-0.763	-0.615	-1.308	-0.154	-0.27
St_mix_pre	NA	5.828	5.757	NA	4.925	NA	NA	NA	NA	NA	NA	-2.37	NA	NA	NA	NA	NA	NA	NA	NA	NA	NA	NA	NA	NA	NA	NA	NA	NA	NA	-2.69	-8.428	4.765	NA	NA	NA	NA	NA	NA	NA	NA	NA	NA	NA	NA	NA	NA	NA	NA
St_BA1_pre	NA	NA	NA	NA	NA	NA	NA	NA	NA	NA	5.256	NA	NA	NA	NA	NA	NA	-7.495	NA	NA	NA	NA	NA	NA	NA	NA	NA	NA	NA	-8.809	NA	NA	NA	NA	NA	NA	NA	NA	NA	NA	NA	NA	NA	NA	NA	NA	NA	NA	NA
St_AA_pre	NA	NA	NA	-3.527	NA	NA	-11.209	-0.34	-6.492	-6.134	NA	NA	NA	NA	-11.068	-3.026	-12.476	NA	-7.223	-12.312	-9.254	NA	NA	NA	-12.307	-3.875	NA	-1.871	-0.112	NA	NA	NA	NA	NA	NA	NA	NA	NA	NA	NA	NA	NA	NA	NA	NA	NA	NA	NA	NA
St_BA2_pre	NA	NA	NA	NA	NA	NA	NA	NA	NA	NA	-3.666	NA	NA	NA	NA	NA	NA	-8.946	NA	NA	NA	NA	NA	NA	NA	NA	NA	NA	NA	-2.332	NA	NA	NA	NA	NA	NA	NA	NA	NA	NA	NA	NA	NA	NA	NA	NA	NA	NA	NA
St_AA_post	NA	NA	NA	-196.579	NA	NA	-4.303	-90.709	28.804	-6.412	NA	NA	NA	NA	-32.501	27.582	73.576	NA	-40.319	90.585	65.419	NA	NA	NA	150.881	36.89	NA	14.546	-12.856	NA	NA	NA	NA	NA	NA	NA	NA	NA	NA	NA	NA	NA	NA	NA	NA	NA	NA	NA	NA
St_BA2_post	NA	NA	NA	NA	NA	NA	NA	NA	NA	NA	-3.391	NA	NA	NA	NA	NA	NA	-8.205	NA	NA	NA	NA	NA	NA	NA	NA	NA	NA	NA	-2.154	NA	NA	NA	NA	NA	NA	NA	NA	NA	NA	NA	NA	NA	NA	NA	NA	NA	NA	NA
St_BA1_post	NA	NA	NA	NA	NA	NA	NA	NA	NA	NA	5.341	NA	NA	NA	NA	NA	NA	-5.762	NA	NA	NA	NA	NA	NA	NA	NA	NA	NA	NA	-9.37	NA	NA	NA	NA	NA	NA	NA	NA	NA	NA	NA	NA	NA	NA	NA	NA	NA	NA	NA
[truncated: 186 more columns]

## Sheet: RatioInfos
	Analyte	MetName	AnalyteNum	AnalyteDen
Xanthine/Guanine	Xanthine/Guanine	Xanthine/Guanine	Xanthine@18.51-gc	Guanine@20.28-gc
Xanthine/HXanthine	Xanthine/HXanthine	Xanthine/HXanthine	Xanthine@18.51-gc	Hypoxanthine@15.75-gc
HXanthine/Inosine	HXanthine/Inosine	HXanthine/Inosine	Hypoxanthine@15.75-gc	Inosine@25.08-gc
Guanine/Guanosine	Guanine/Guanosine	Guanine/Guanosine	Guanine@20.28-gc	Guanosine@2.30-qppos
Urate/Xanthine	Urate/Xanthine	Urate/Xanthine	Uric acid@20.03-gc	Xanthine@18.51-gc
FMN/FAD	FMN/FAD	FMN/FAD	FMN@7.72-qpneg	FAD@7.51-qppos
Riboflavin/FMN	Riboflavin/FMN	Riboflavin/FMN	Riboflavin@5.94-qppos	FMN@7.72-qpneg
AcCarn/Carn	AcCarn/Carn	AcCarn/Carn	Acetylcarnitine@1.23-qppos	Carnitine@1.02-qppos
Glyc3P/Glycerol	Glyc3P/Glycerol	Glyc3P/Glycerol	Glycerol-3-phosphate@15.38-gc	Glycerol@9.36-gc
Taurocholate/Tau	Taurocholate/Tau	Taurocholate/Tau	Taurocholic acid@4.46-ba	Taurine@1.52-qpneg
TCDCholate/Tau	TCDCholate/Tau	TCDCholate/Tau	Taurochenodeoxycholic acid@6.92-ba	Taurine@1.52-qpneg
Glyc3P/GPCho	Glyc3P/GPCho	Glyc3P/GPCho	Glycerol-3-phosphate@15.38-gc	Glycerophosphorylcholine@1.02-qppos
Stearate/Linolenate	Stearate/Linolenate	Stearate/Linolenate	Stearidonic acid@18.89-qpneg	Linolenic acid@19.57-qpneg
Fum/Suc	Fum/Suc	Fum/Suc	Fumaric acid@10.23-gc	Succinic acid@9.82-gc
Pyr/Lac	Pyr/Lac	Pyr/Lac	Pyruvic acid;Oxaloacetic acid@6.36-gc	Lactic acid@6.49-gc
Citrate/Oaa	Citrate/Oaa	Citrate/Oaa	Citric acid;Isocitric acid@15.97-gc	Pyruvic acid;Oxaloacetic acid@6.36-gc
Pyr/Malate	Pyr/Malate	Pyr/Malate	Pyruvic acid;Oxaloacetic acid@6.36-gc	Malic acid@12.14-gc
Oaa/Malate	Oaa/Malate	Oaa/Malate	Pyruvic acid;Oxaloacetic acid@6.36-gc	Malic acid@12.14-gc
Fum/Malate	Fum/Malate	Fum/Malate	Fumaric acid@10.23-gc	Malic acid@12.14-gc
Xylose/Xylitol	Xylose/Xylitol	Xylose/Xylitol	Xylose@14.27-gc	Xylitol@14.81-gc
Sucrose/Raffinose	Sucrose/Raffinose	Sucrose/Raffinose	Sucrose@27.03-gc	Raffinose@31.36-gc
Cit/Arg	Cit/Arg	Cit/Arg	Citrulline@15.94-gc	Arginine@0.98-qppos
Tyr/Phe	Tyr/Phe	Tyr/Phe	Tyrosine@17.28-gc	Phenylalanine@13.78-gc
Glu/Gln	Glu/Gln	Glu/Gln	Glutamic acid@13.70-gc	Glutamine@15.40-gc
Orn/Arg	Orn/Arg	Orn/Arg	Ornithine@2.12-pa	Arginine@0.98-qppos
Cit/Orn	Cit/Orn	Cit/Orn	Citrulline@15.94-gc	Ornithine@2.12-pa
Put/Orn	Put/Orn	Put/Orn	Putrescine@4.53-pa	Ornithine@2.12-pa
Kyn/Trp	Kyn/Trp	Kyn/Trp	Kynurenine@21.46-gc	Tryptophan@21.89-gc
Asn/Asp	Asn/Asp	Asn/Asp	Asparagine@14.30-gc	Aspartic acid@12.54-gc
Pyr/Ala	Pyr/Ala	Pyr/Ala	Pyruvic acid;Oxaloacetic acid@6.36-gc	Alanine@7.03-gc
Pyr/Ser	Pyr/Ser	Pyr/Ser	Pyruvic acid;Oxaloacetic acid@6.36-gc	Serine@10.51-gc
aKG/Glu	aKG/Glu	aKG/Glu	2-oxoglutaric acid@13.19-gc	Glutamic acid@13.70-gc
Oaa/Asp	Oaa/Asp	Oaa/Asp	Pyruvic acid;Oxaloacetic acid@6.36-gc	Aspartic acid@12.54-gc
Asp/Malate	Asp/Malate	Asp/Malate	Aspartic acid@12.54-gc	Malic acid@12.14-gc
Urea/Arginine	Urea/Arginine	Urea/Arginine	Urea@8.84-gc	Arginine@0.98-qppos
Serine/PSerine	Serine/PSerine	Serine/PSerine	Serine@10.51-gc	Phosphoserine@0.98-qppos
Carnosine/BetaAla	Carnosine/BetaAla	Carnosine/BetaAla	Carnosine@1.00-qppos	Beta-alanine@11.33-gc
Val/KIV	Val/KIV	Val/KIV	Valine@8.55-gc	Ketoisovaleric acid@7.47-gc
BetaAla/Asp	BetaAla/Asp	BetaAla/Asp	Beta-alanine@11.33-gc	Aspartic acid@12.54-gc
HOPro/Pro	HOPro/Pro	HOPro/Pro	4-hydroxyproline@12.60-gc	Proline@9.64-gc
GABA/Glu	GABA/Glu	GABA/Glu	GABA@12.61-gc	Glutamic acid@13.70-gc
Spmd/Put	Spmd/Put	Spmd/Put	Spermidine@6.61-pa	Putrescine@4.53-pa
Spr/Spmd	Spr/Spmd	Spr/Spmd	Spermine@7.45-pa	Spermidine@6.61-pa
AcPut/Put	AcPut/Put	AcPut/Put	N-acetylputrescine@3.33-pa	Putrescine@4.53-pa
SAM/Met	SAM/Met	SAM/Met	S-adenosylmethionine@4.07-pa	Methionine@12.49-gc
Glu/Oxoproline	Glu/Oxoproline	Glu/Oxoproline	Glutamic acid@13.70-gc	5-oxoproline@12.53-gc
AcSpmd/Spmd	AcSpmd/Spmd	AcSpmd/Spmd	N1-acetylspermidine@5.22-pa	Spermidine@6.61-pa
AcSpmd/Spmd_1	AcSpmd/Spmd_1	AcSpmd/Spmd	N8-acetylspermidine@5.41-pa	Spermidine@6.61-pa
AcSpr/Spr	AcSpr/Spr	AcSpr/Spr	N1-acetylspermine@6.84-pa	Spermine@7.45-pa
DiAcSpmd/AcSpmd	DiAcSpmd/AcSpmd	DiAcSpmd/AcSpmd	N1,N8-diacetylspermidine@4.39-pa	N1-acetylspermidine@5.22-pa
DiAcSpmd/AcSpmd_1	DiAcSpmd/AcSpmd_1	DiAcSpmd/AcSpmd	N1,N8-diacetylspermidine@4.39-pa	N8-acetylspermidine@5.41-pa

## Sheet: Ratio
	Xanthine.Guanine	Xanthine.HXanthine	HXanthine.Inosine	Guanine.Guanosine	Urate.Xanthine	FMN.FAD	Riboflavin.FMN	AcCarn.Carn	Glyc3P.Glycerol	Taurocholate.Tau	TCDCholate.Tau	Glyc3P.GPCho	Stearate.Linolenate	Fum.Suc	Pyr.Lac	Citrate.Oaa	Pyr.Malate	Oaa.Malate	Fum.Malate	Xylose.Xylitol	Sucrose.Raffinose	Cit.Arg	Tyr.Phe	Glu.Gln	Orn.Arg	Cit.Orn	Put.Orn	Kyn.Trp	Asn.Asp	Pyr.Ala	Pyr.Ser	aKG.Glu	Oaa.Asp	Asp.Malate	Urea.Arginine	Serine.PSerine	Carnosine.BetaAla	Val.KIV	BetaAla.Asp	HOPro.Pro	GABA.Glu	Spmd.Put	Spr.Spmd	AcPut.Put	SAM.Met	Glu.Oxoproline	AcSpmd.Spmd	AcSpmd.Spmd_1	AcSpr.Spr
colon-666-FMT_61	14.1846	0.163278	5.83526	6.51002	0.0420573	0.911322	0.0031565	0.646963	0.194257	92.4855	3.33652	2.67351	0.0260288	0.476133	0.0479728	1.98403	0.471212	0.471212	2.04577	45.6121	3.48421	0.500799	0.916306	95.6069	0.17558	2.85225	24.0426	0.0140692	0.0265524	0.00406555	1.43156	0.00296235	0.0183049	25.7424	0.772339	0.278547	0.016666	2131.27	1.53947	1.23762	0.0292243	0.93957	0.00546418	0.308775	0.00354925	3.11412	1.33596	0.0432088	3.48645
colon-667-FMT-AKK-Pas_62	3.03469	0.187154	3.74493	3.96257	0.044458	0.852367	0.452859	1.09041	0.0734195	15.7705	0.564916	0.0955445	0.0259569	0.317583	0.00692146	0.0680524	1.65652	1.65652	2.54936	102.812	0.0368012	0.0594529	0.563064	42.1567	0.0308568	1.92674	17.0506	0.00657256	0.0341284	0.0189066	1.36849	0.00133796	0.271408	6.10344	0.278824	8.61189	0.041404	2145.28	5.23053	0.783681	0.0680565	0.474865	0.0114683	0.190519	0.000188789	3.55706	2.68912	0.117466	1.3279
colon-684-SPF_79	2.02975	0.0808116	3.97272	6.98246	0.00507281	0.734524	0.0155512	1.07348	0.0459829	69.6788	4.79621	0.963991	0.0266434	0.701195	0.0109789	0.427774	0.516002	0.516002	2.91543	441.47	1.19492	0.135858	0.514565	129.528	0.0982169	1.38324	1.57046	0.0307519	0.0140164	0.00650298	0.268531	0.00137577	0.0617734	8.35315	0.379658	11.8792	0.0129066	825.564	6.77799	4.91316	0.0176959	10.0684	0.00295112	0.111617	0.000714832	4.98708	0.412534	0.021605	0.991532
colon-668-FMT-AKK_63	37.9146	0.492428	5.32603	3.8493	0.0173876	3.31806	0.0578922	0.255339	0.494532	11.2027	0.124804	1.04425	0.0260197	0.354372	0.143555	0.522985	0.692195	0.692195	2.20425	38.6123	0.583701	0.0477126	1.17488	38.3781	0.0013808	34.5542	8.267	0.00324976	0.0222665	0.00650747	0.592554	0.0346623	0.0558894	12.3851	0.145381	0.887602	0.0221346	431.968	3.98709	0.171295	0.0512972	11.7078	0.00241599	3.13813	0.00359286	2.08548	1.49212	0.0577726	2.86522
colon-690-ATB_85	4.6049	0.45448	0.431122	2.26135	1.56351	6.88692	0.752304	0.490559	0.0118582	19.8213	0.129801	0.241962	0.021271	0.151738	0.081222	7.75023	0.0635463	0.0635463	1.90642	7.41172	0.023156	0.0538249	0.646458	72.4715	0.00144908	37.1442	3.35719	0.00134487	0.0278188	0.0172581	0.970864	0.0396376	0.153029	0.415257	18.2787	9.05937	0.0244287	213.784	5.51541	0.307237	0.0486422	15.8898	0.00724422	3.68313	0.0104588	3.67233	1.38435	0.0838296	0.931185
colon-681-FMT-AKK-Pas_76	5.04779	0.27355	4.144	7.15484	0.0777423	0.635899	0.871626	0.756167	0.149235	1.28661	0.0261912	0.0679884	0.028427	0.142927	0.00703993	0.327205	0.420393	0.420393	1.93108	20.7138	0.519313	0.145964	0.639302	32.9653	0.0597935	2.44113	5.11559	0.0122429	0.0127522	0.01252	1.00233	0.00131909	0.119036	3.53164	3.95616	5.10239	0.0280634	2005.73	3.73307	1.13968	0.0458847	0.826857	0.00110929	0.362559	0.00109243	4.96114	2.33317	0.0931665	8.60742
colon-670-FMT_65	4.3721	0.218049	1.27124	4.57517	0.0619198	1.10931	0.0168279	0.883385	0.0903577	0.754893	0.101247	2.17738	0.0192631	0.329556	0.00853369	0.680916	0.416872	0.416872	3.21006	142.001	0.00209025	0.308225	0.528321	67.6419	0.595302	0.517762	12.3197	0.0147663	0.0128859	0.00644135	0.272492	0.000742178	0.0377748	11.0357	0.94313	13.7281	0.016221	2717.75	3.69155	2.87149	0.0212517	0.297953	0.000642282	0.137743	0.000645359	4.88701	2.66636	0.092286	17.7348
colon-685-SPF_80	7.35594	0.106161	12.7874	5.3795	0.0102703	1.5221	0.0105014	0.895797	0.186749	125.857	11.2026	#N/A	0.0314345	0.613053	0.0406681	0.925902	0.64882	0.64882	4.26155	422.271	1.88516	0.281736	0.697549	68.7846	0.0409037	6.88779	1.49735	0.00471885	0.0353405	0.00347644	0.279365	0.00721475	0.04485	14.4664	0.460267	0.56187	0.0270843	593.794	4.90511	1.84452	0.0135687	65.3406	0.000157516	0.0852081	0.00225111	2.27905	0.198002	0.0117837	22.9259
colon-675-FMT-AKK_70	8.46991	0.305706	3.6725	8.7044	0.0607073	1.42411	0.157147	0.359065	0.261352	5.01357	0.0826274	0.576184	0.018111	0.0338468	0.0170087	0.511223	0.500145	0.500145	2.04257	28.3037	0.123086	0.0760661	0.689232	45.7285	0.0102304	7.43532	7.9053	0.00774132	0.0151695	0.00866838	0.585063	0.00930899	0.0570054	8.77365	0.189296	4.98893	0.0184688	585.915	2.9209	0.759889	0.0259964	1.26545	0.000513252	0.347944	0.00197895	3.722	2.50536	0.0884449	7.67457
colon-692-ATB_87	3.10982	0.649787	0.327817	4.13623	1.54427	7.79561	#N/A	0.569904	0.0121803	11.7533	0.0934867	0.165756	0.0227399	0.156377	0.120414	4.58571	0.0739591	0.0739591	1.95646	9.94878	0.019538	0.0567547	0.717139	118.714	0.00173715	32.6712	13.371	0.00239938	0.0315112	0.0225908	2.27517	0.0206981	0.199835	0.3701	18.7154	3.63847	0.0194973	150.285	7.23664	0.68421	0.0442104	17.875	0.000162413	0.758601	0.0263656	4.01718	0.252443	0.0164628	6.10184
colon-683-FMT_78	1.88629	0.242763	0.739745	1.53193	0.15685	0.582417	0.420539	0.656698	0.0361436	1.71034	0.0969821	0.343601	0.0225245	0.178618	0.00860534	0.0867053	1.56584	1.56584	3.20076	17.9793	0.407046	0.227529	0.582143	42.6326	0.147967	1.5377	15.3169	0.00423736	0.0078014	0.0106261	1.86602	0.000454081	0.094793	16.5185	0.18626	1.39153	0.0461149	1468.7	4.08987	2.08774	0.0558877	0.186429	0.00153128	0.153448	0.00261678	3.62434	3.03798	0.0973289	3.35102
colon-689-SPF_84	9.98792	0.131031	16.1488	14.5589	0.00259689	5.50649	0.00263399	0.817749	0.276573	1.02178	0.0746382	5.87735	0.0259296	0.578012	0.0108625	1.88472	0.322214	0.322214	6.19239	1450.99	0.0135186	0.0299693	1.00371	329.005	0.0591188	0.506933	1.39002	0.0156592	0.0387976	0.00873501	0.2585	0.00720207	0.0247257	13.0316	0.317108	0.29255	0.0323938	2552.65	5.83069	0.362833	0.0120637	39.2869	6.94841e-05	0.0439044	0.00581907	1.00599	0.196411	0.0127869	31.6411
colon-680-FMT-AKK_75	5.6895	0.270055	2.96559	6.03583	0.0526195	2.11282	0.295486	0.415809	0.249484	26.2335	0.309796	0.867058	0.0215541	0.113105	0.0311084	0.608585	0.449527	0.449527	2.5056	37.1927	0.774272	0.0650261	0.511057	41.0953	0.00704935	9.22441	80.8357	0.00982361	0.0353633	0.00616025	0.62818	0.00548567	0.109253	4.11455	0.283406	8.97038	0.0303353	749.134	7.52601	1.38078	0.0558698	0.482212	0.00165326	0.168379	0.00105818	3.24143	4.53492	0.187477	4.22605
colon-686-ATB_81	5.6018	0.429654	1.16064	3.94812	0.814302	4.41563	#N/A	0.817575	0.0272155	17.1393	0.19076	0.0748951	0.0116753	0.179943	0.0901601	2.86435	0.0952729	0.0952729	1.92053	11.7077	0.0297627	0.0497279	0.420641	31.109	0.00110227	45.114	3.2708	0.00223413	0.0310924	0.040338	0.867651	0.0170001	0.158337	0.60171	9.56861	6.02489	0.0489618	167.703	2.43227	0.876097	0.0482979	7.47698	0.00222729	6.32367	0.00626118	2.9299	4.76593	0.232204	8.61343
colon-676-FMT-AKK-Pas_71	1.34367	0.172985	1.49186	5.16651	0.0355718	0.779451	1.04088	0.573627	0.0764189	#N/A	#N/A	0.571056	0.0246958	0.549519	0.0203265	0.225408	0.795751	0.795751	6.19784	34.3528	0.0121528	0.0592414	0.542893	102.533	0.00722066	8.20443	89.653	0.0116026	0.0207793	0.0141008	1.10519	0.000764033	0.0911268	8.73235	0.153222	4.72644	0.0166901	1728.74	10.5454	8.91734	0.0781404	0.199452	0.00389314	0.120158	0.00124589	2.80422	3.19292	0.110847	2.02576
colon-682-FMT_77	13.9734	0.210587	8.13576	0.448683	0.104379	1.27307	#N/A	0.656443	0.261085	#N/A	#N/A	4.40021	0.0204258	0.406922	0.0796894	1.17035	0.575449	0.575449	2.63133	36.0653	0.157861	0.679902	1.13831	35.7918	0.0642085	10.589	56.6006	0.0039585	0.0221433	0.00471096	0.323618	0.00509864	0.0228959	25.1333	0.805619	0.541861	0.0204781	1527.52	2.274	2.81627	0.0544234	1.74809	0.000124383	0.337921	0.00278773	1.93997	0.855916	0.0406801	191.408
colon-688-ATB_83	4.1754	0.50922	0.758114	4.18244	0.96294	4.30831	0.851366	0.663917	0.0180591	11.2818	0.0953628	0.0872731	0.0183251	0.135736	0.0830689	4.14661	0.144101	0.144101	1.54749	6.25082	0.0260664	0.0474988	0.493729	56.9803	0.000885899	53.6165	1.61119	0.00140792	0.0487261	0.0360382	1.96042	0.0346314	0.442846	0.325397	15.0658	9.52545	0.0373742	408.035	7.40337	0.423794	0.0485999	9.96664	0.0867295	12.9956	0.0157337	3.44826	8.87567	0.563778	0.327878
colon-687-SPF_82	3.57445	0.0917836	13.5174	37.42	0.0132787	2.49333	0.000996492	0.766952	0.489724	#N/A	#N/A	1.49996	0.020245	0.570715	0.0279489	10.4967	0.278308	0.278308	4.17035	673.678	0.746027	0.134538	0.524755	25.3286	0.0273478	4.91951	4.37699	0.0126069	0.00944389	0.00220017	0.114464	0.00184364	0.00629811	44.1891	0.235322	1.52498	0.0128273	314.128	0.899007	0.463838	0.00926484	12.8212	0.000585134	0.0421954	0.0101748	2.52121	0.146776	0.00879617	6.47161
colon-679-FMT-AKK_74	11.1301	0.580403	2.29141	5.48377	0.0390596	2.00734	0.103244	0.352806	0.4089	3.27181	0.0515811	0.565659	0.0220765	0.0602646	0.169651	0.289434	0.792727	0.792727	3.57687	20.9311	0.0662959	0.0729278	0.571386	32.4199	0.0010371	70.319	43.5304	0.00434265	0.0332034	0.00604402	0.509905	0.00480878	0.100692	7.87277	0.0775982	2.30832	0.0334679	2893.61	6.11445	0.0769178	0.0360148	2.4536	0.000449047	0.923096	0.00363245	3.59039	1.97353	0.102542	16.2974
colon-673-FMT-AKK-Pas_68	4.97762	0.302185	2.50045	19.1677	0.0411796	1.03589	0.323735	0.302221	0.303331	1.68394	0.0350282	0.285364	0.0146881	0.0203429	0.132273	0.235997	0.321394	0.321394	1.48879	21.7948	0.336336	0.102776	0.876997	40.7408	0.0126934	8.09683	3.3509	0.00351053	0.0326314	0.0109204	0.813721	0.0133045	0.0560846	5.73051	0.3547	1.07774	0.0244902	517.07	2.74103	0.922614	0.0382495	3.58678	0.00296798	1.25767	0.00751682	2.64616	1.75484	0.0726571	1.18615
colon-691-ATB_86	3.0219	0.482568	0.54263	6.09909	1.08871	4.84395	#N/A	0.527632	0.014929	22.2799	0.237942	0.170847	0.0219821	0.125986	0.185238	4.4284	0.149793	0.149793	1.75122	4.34055	0.0266535	0.0543161	0.50643	81.7952	0.000548067	99.1049	2.93125	0.0024605	0.0336672	0.0411422	2.11956	0.0257403	0.370975	0.403781	13.7759	6.38414	0.0286465	179.899	8.61935	1.23815	0.0461824	12.496	0.015625	10.8283	0.0085774	2.86041	5.59979	0.310156	0.760409
colon-678-FMT_73	18.2027	0.265249	6.50649	3.46509	0.066061	1.44382	0.00593476	0.580079	0.287003	#N/A	#N/A	1.60069	0.000591153	0.44754	0.0474102	2.02976	0.427837	0.427837	2.54941	35.1091	0.0288771	0.489984	0.932658	23.9688	0.0828056	5.91727	16.2016	0.00505431	0.0243292	0.00538158	0.326247	0.0067494	0.0340596	12.5614	0.737833	0.32035	0.0324712	1224.45	2.76201	3.30282	0.0451604	3.17434	0.000325426	0.689201	0.0084568	2.0942	0.744851	0.0427296	55.1204
colon-677-FMT-AKK-Pas_72	1.29959	0.137007	3.41738	22.6275	0.0816034	0.915257	#N/A	0.639339	0.101148	35.3264	0.691792	0.167167	0.023155	0.404	0.0115661	0.0915511	1.68657	1.68657	4.4909	41.1854	0.0244039	0.108097	0.537398	32.2333	0.0420457	2.57094	28.9783	0.00592968	0.0322987	0.0173264	1.41803	0.00168783	0.230154	7.32801	0.229287	15.5844	0.0131471	1451.95	8.69329	2.13021	0.0685386	0.111581	#N/A	0.104473	0.000322098	2.61253	5.84412	0.170363	#N/A
colon-693-SPF_88	2.36952	0.232299	1.18388	4.97003	0.0179708	0.747727	0.251625	0.985287	0.0685456	#N/A	#N/A	1.15344	0.0299669	0.609232	0.0106557	0.213301	0.511319	0.511319	2.58822	53.0167	0.787275	0.189295	0.635319	51.5284	0.0420442	4.50229	11.0648	0.00913275	0.0611885	0.0073073	0.626059	0.00154832	0.132753	3.85166	0.60773	9.25256	0.0325357	826.635	11.2106	4.03792	0.0505772	4.13932	0.000243667	0.105802	0.000875316	2.69133	0.848125	0.047186	29.8072
colon-672-FMT-AKK_67	8.94388	0.463851	3.10419	4.51677	0.0599503	1.78369	0.129473	0.530702	0.488339	#N/A	#N/A	0.238034	0.000361937	0.107705	0.0521052	0.831182	0.271283	0.271283	1.82002	24.709	0.223264	0.0694708	0.873333	27.3505	0.00245314	28.3192	10.9337	0.00449144	0.0471255	0.00491656	0.488939	0.0204603	0.0422282	6.4242	0.170692	1.122	0.0270596	667.912	2.85793	0.280326	0.0389916	4.88021	0.00205607	1.54302	0.00444888	2.23972	1.9971	0.0945071	2.24404
colon-694-ATB_89	3.1284	0.454377	0.682504	5.38893	1.36782	4.24031	1.41958	0.712949	0.0212345	22.8683	0.246796	0.118977	0.0166612	0.17023	0.116035	2.07603	0.111569	0.111569	1.97237	4.30368	0.025778	0.0613913	0.440627	40.8593	0.000633811	96.8604	4.56037	0.00210853	0.033558	0.0380878	1.08713	0.0111326	0.253459	0.440187	15.0119	12.8226	0.0367593	214.214	5.34479	1.01146	0.0494553	11.435	0.00398457	6.20611	0.0068267	2.84712	3.49751	0.231454	2.95217
colon-671-FMT-AKK-Pas_66	1.80024	0.174992	3.3836	7.14234	0.108922	1.40597	0.0249534	1.01531	0.0773271	171.646	5.52798	0.119219	0.0143354	0.371077	0.00650845	0.288401	1.10962	1.10962	8.60735	43.0385	0.807488	0.0261286	0.751569	114.994	0.0540804	0.483143	38.2997	0.0151847	0.0465747	0.00999364	2.29979	0.00205422	0.220969	5.02158	0.489689	5.06234	0.0117195	4093.99	15.005	0.142723	0.125302	0.312831	0.000882891	0.110612	0.0005113	0.986027	3.33206	0.145071	29.7792
colon-695-SPF_90	2.78051	0.160388	2.34009	6.40652	0.0167877	0.760219	0.0208749	1.38787	0.147829	#N/A	#N/A	1.13981	0.0219353	0.620269	0.028873	0.346971	0.308662	0.308662	2.4295	153.189	0.0389706	0.235031	0.614298	56.7901	0.0853069	2.75512	6.73095	0.00917793	0.0162741	0.00610033	0.428276	0.000888603	0.04713	6.54915	0.606199	8.99745	0.0215818	1574.7	3.87461	1.93642	0.0302556	3.40174	0.000296333	0.181705	0.00106514	3.27767	1.30277	0.0761083	22.2453
colon-674-FMT-AKK_69	9.18307	0.296629	4.38953	5.50826	0.0391941	1.23902	0.339705	0.452877	0.229539	13.2329	0.134398	0.123211	0.0195106	0.136174	0.0384763	0.195811	0.837313	0.837313	3.3966	28.4259	1.05842	0.05515	0.422559	28.1377	0.000399596	138.014	353.968	0.00593024	0.0266142	0.0141326	0.560913	0.00193311	0.11708	7.1516	0.250326	7.92869	0.0570789	939.538	3.39475	0.823281	0.0384485	1.43471	0.00161976	0.289146	0.00130672	3.98322	2.38922	0.10157	5.96931
colon-669-FMT_64	7.02982	0.171886	8.91109	40.7512	0.0322791	2.67431	#N/A	0.560669	0.522751	3.73566	0.147029	4.12869	0.0268993	0.575547	0.0667468	1.32441	0.739467	0.739467	4.99791	39.8032	4.75001	0.490545	1.07786	22.0949	0.066282	7.40088	81.525	0.004365	0.0318939	0.00526191	0.285973	0.00567111	0.0293202	25.2204	2.07177	0.741247	0.0219835	1572.98	3.08292	1.77642	0.0315386	0.908339	0.000213641	0.235879	0.00508879	1.88775	1.41814	0.0648782	115.53
[truncated: 2 more columns]

## Sheet: RatioLog2Cen
	Xanthine.Guanine	Xanthine.HXanthine	HXanthine.Inosine	Guanine.Guanosine	Urate.Xanthine	FMN.FAD	Riboflavin.FMN	AcCarn.Carn	Glyc3P.Glycerol	Taurocholate.Tau	TCDCholate.Tau	Glyc3P.GPCho	Stearate.Linolenate	Fum.Suc	Pyr.Lac	Citrate.Oaa	Pyr.Malate	Oaa.Malate	Fum.Malate	Xylose.Xylitol	Sucrose.Raffinose	Cit.Arg	Tyr.Phe	Glu.Gln	Orn.Arg	Cit.Orn	Put.Orn	Kyn.Trp	Asn.Asp	Pyr.Ala	Pyr.Ser	aKG.Glu	Oaa.Asp	Asp.Malate	Urea.Arginine	Serine.PSerine	Carnosine.BetaAla	Val.KIV	BetaAla.Asp	HOPro.Pro	GABA.Glu	Spmd.Put	Spr.Spmd	AcPut.Put	SAM.Met	Glu.Oxoproline	AcSpmd.Spmd	AcSpmd.Spmd_1	AcSpr.Spr
colon-666-FMT_61	1.50432	-0.618535	1.14434	0.147197	-0.751657	-0.922486	-4.71441	0.0301999	0.815491	3.05271	3.75446	2.47248	0.632423	1.00547	0.471469	1.39831	0.195948	0.195948	-0.448647	0.177445	4.66205	2.21683	0.484066	0.892967	3.73262	-1.51579	1.10271	1.2772	0.0314901	-1.27295	1.0555	-0.649017	-2.12574	2.32169	-0.05753	-3.45826	-0.581148	1.32076	-1.5518	0.306686	-0.4032	-1.49068	2.15759	-0.503176	0.420068	0.138401	-0.236108	-0.776407	-0.909426
colon-667-FMT-AKK-Pas_62	-0.720376	-0.421639	0.504482	-0.569027	-0.671569	-1.01897	2.45018	0.783312	-0.588243	0.500713	1.19222	-2.33394	0.628435	0.421237	-2.3216	-3.46734	2.00966	2.00966	-0.131154	1.34996	-1.90288	-0.85758	-0.218463	-0.288385	1.22415	-2.08173	0.606938	0.179183	0.39362	0.944418	0.990496	-1.79572	1.76442	0.24524	-1.52741	1.49208	0.731718	1.33021	0.212723	-0.352547	0.816367	-2.47516	3.22716	-1.1998	-3.8126	0.330259	0.773153	0.666439	-2.30204
colon-684-SPF_79	-1.30062	-1.63323	0.589671	0.248271	-3.80316	-1.23364	-2.41378	0.760744	-1.26331	2.6442	4.27801	1.00084	0.666096	1.56392	-1.65601	-0.815205	0.32695	0.32695	0.0624175	3.45227	3.11813	0.334696	-0.348411	1.33104	2.89453	-2.55984	-2.83363	2.40533	-0.890242	-0.595301	-1.35893	-1.75552	-0.370989	0.697939	-1.08206	1.95611	-0.949947	-0.0474984	0.586625	2.29577	-1.12695	1.93101	1.26885	-1.97118	-1.89177	0.817771	-1.9314	-1.77637	-2.72345
colon-668-FMT-AKK_63	2.92276	0.974046	1.0126	-0.610868	-2.02596	0.941822	-0.517437	-1.31107	2.16359	0.00732978	-0.986148	1.11622	0.631921	0.579366	2.05278	-0.525284	0.750751	0.750751	-0.341003	-0.0629094	2.08452	-1.17496	0.842673	-0.423863	-3.25786	2.0829	-0.437451	-0.836937	-0.22248	-0.594306	-0.217073	2.89954	-0.5154	1.26615	-2.46693	-1.78627	-0.171751	-0.981953	-0.178898	-2.54633	0.408514	2.14864	0.980199	2.8421	0.437686	-0.440047	-0.0766182	-0.357348	-1.19254
colon-690-ATB_85	-0.118756	0.858349	-2.61429	-1.37828	4.46463	1.99534	3.18244	-0.369058	-3.21852	0.830536	-0.929512	-0.993398	0.341201	-0.644317	1.23112	3.36411	-2.69455	-2.69455	-0.550427	-2.44409	-2.57125	-1.00105	-0.019207	0.493266	-3.18823	2.18718	-1.73756	-2.10981	0.0987083	0.812796	0.495249	3.09304	0.937755	-3.6323	4.50725	1.56516	-0.0294779	-1.99673	0.289235	-1.70346	0.331841	2.58928	2.56441	3.07313	1.97919	0.376272	-0.184768	0.179727	-2.81404
colon-681-FMT-AKK-Pas_76	0.0137276	0.125936	0.650566	0.283455	0.134688	-1.44165	3.39483	0.255221	0.435108	-3.11488	-3.23866	-2.82482	0.759581	-0.730622	-2.29712	-1.20186	0.031312	0.031312	-0.53188	-0.961378	1.9159	0.438209	-0.0352645	-0.643201	2.17855	-1.74034	-1.12991	1.0766	-1.02661	0.349763	0.541266	-1.81621	0.575355	-0.544043	2.29927	0.73692	0.170638	1.23318	-0.273869	0.187746	0.247645	-1.67504	-0.142781	-0.271514	-1.2799	0.810247	0.568309	0.332078	0.394398
colon-670-FMT_65	-0.193598	-0.201217	-1.05422	-0.36164	-0.193611	-0.638861	-2.29995	0.479558	-0.288759	-3.8841	-1.28793	2.17634	0.198153	0.474627	-2.01951	-0.144577	0.019176	0.019176	0.20131	1.81586	-6.04089	1.51658	-0.310349	0.393769	5.49411	-3.97753	0.138086	1.34696	-1.01156	-0.609038	-1.33781	-2.64592	-1.08055	1.09973	0.230693	2.1648	-0.620192	1.67146	-0.290006	1.52091	-0.862791	-3.1476	-0.931137	-1.66775	-2.03927	0.788527	0.76089	0.318379	1.43732
colon-685-SPF_80	0.556985	-1.23961	2.27619	-0.127992	-2.78554	-0.182456	-2.98022	0.499689	0.758625	3.49719	5.50188	#N/A	0.904664	1.37011	0.233148	0.298806	0.657391	0.657391	0.610087	3.38813	3.77591	1.38695	0.0905313	0.417939	1.63079	-0.243845	-2.90241	-0.298837	0.443966	-1.49879	-1.30187	0.63519	-0.832866	1.49026	-0.804291	-2.44594	0.119405	-0.522916	0.120052	0.882358	-1.51008	4.62916	-2.95885	-2.36067	-0.236812	-0.311993	-2.99039	-2.65094	1.80772
colon-675-FMT-AKK_70	0.760422	0.286278	0.476304	0.566281	-0.222142	-0.278459	0.923237	-0.819238	1.24352	-1.15261	-1.58112	0.258349	0.109186	-2.80881	-1.02448	-0.558101	0.28192	0.28192	-0.450905	-0.510982	-0.161044	-0.502074	0.0732266	-0.171053	-0.368582	-0.133492	-0.501994	0.415307	-0.776185	-0.180639	-0.23543	1.00287	-0.486877	0.768797	-2.08612	0.704478	-0.432964	-0.542188	-0.627821	-0.397024	-0.572056	-1.0611	-1.25468	-0.330876	-0.422715	0.395653	0.671034	0.257045	0.228902
colon-692-ATB_87	-0.685092	1.3741	-3.00949	-0.507147	4.44677	2.17414	#N/A	-0.152764	-3.17985	0.0765547	-1.40298	-1.53912	0.437541	-0.600873	1.79918	2.60702	-2.47563	-2.47563	-0.513047	-2.01938	-2.81635	-0.924587	0.130489	1.20527	-2.92665	2.00206	0.256225	-1.27461	0.278511	1.20126	1.72388	2.15567	1.32277	-3.7984	4.54132	0.24908	-0.354779	-2.50517	0.681088	-0.548375	0.194019	2.75912	-2.91468	0.793611	3.31314	0.505757	-2.63995	-2.16853	-0.10194
colon-683-FMT_78	-1.40638	-0.0463164	-1.83536	-1.94012	1.14731	-1.56839	2.34336	0.0517458	-1.61066	-2.70416	-1.35003	-0.487447	0.423814	-0.409018	-2.00744	-3.11786	1.92844	1.92844	0.197122	-1.16563	1.56449	1.07866	-0.17039	-0.272192	3.48577	-2.40711	0.452238	-0.454106	-1.73555	0.113145	1.43787	-3.35474	0.246805	1.68163	-2.10945	-1.13758	0.887181	0.783585	-0.142178	1.06106	0.532165	-3.82406	0.322323	-1.51198	-0.0196533	0.357292	0.949133	0.395135	-0.966585
colon-689-SPF_84	0.99826	-0.935959	2.6129	1.30836	-4.76916	1.67261	-4.97549	0.368175	1.32518	-3.44736	-1.72783	3.60891	0.626917	1.2852	-1.67139	1.32422	-0.352408	-0.352408	1.14921	5.16893	-3.34769	-1.84584	0.615507	2.67589	2.16218	-4.00802	-3.00971	1.43167	0.578612	-0.169593	-1.41386	0.632652	-1.69197	1.33956	-1.34179	-3.3875	0.377666	1.58104	0.369433	-1.46351	-1.67969	3.89522	-4.13959	-3.3173	1.13334	-1.49181	-3.00203	-2.53307	2.27254
colon-680-FMT-AKK_75	0.186376	0.107388	0.16786	0.0380874	-0.428414	0.290648	1.83421	-0.607564	1.17647	1.2349	0.325501	0.847949	0.360279	-1.06824	-0.153443	-0.306595	0.127979	0.127979	-0.156135	-0.11695	2.49213	-0.728308	-0.358278	-0.325173	-0.905879	0.177571	2.85211	0.758981	0.444898	-0.673414	-0.132842	0.239909	0.451625	-0.323646	-1.50389	1.55092	0.282945	-0.187654	0.737653	0.464598	0.531703	-2.45301	0.432898	-1.37802	-1.32586	0.196204	1.5271	1.34091	-0.631875
colon-686-ATB_81	0.163964	0.777308	-1.18554	-0.574298	3.52348	1.3541	#N/A	0.367868	-2.01998	0.620787	-0.374056	-2.68524	-0.524222	-0.398354	1.38174	1.92808	-2.11029	-2.11029	-0.539789	-1.78452	-2.20913	-1.11527	-0.639173	-0.726815	-3.58289	2.46762	-1.77517	-1.37756	0.259206	2.03766	0.333095	1.87171	0.986951	-3.09724	3.57347	0.976682	0.973603	-2.34697	-0.891928	-0.191723	0.321593	1.5017	0.862878	3.85296	1.23899	0.0504275	1.59878	1.64959	0.395404
colon-676-FMT-AKK-Pas_71	-1.89574	-0.535218	-0.82335	-0.186275	-0.993279	-1.14799	3.65085	-0.143371	-0.530476	#N/A	#N/A	0.245451	0.556582	1.21227	-0.76739	-1.73951	0.951889	0.951889	1.15047	-0.231545	-3.50135	-0.862721	-0.271096	0.993862	-0.871237	0.00851596	3.00146	0.999105	-0.322207	0.521304	0.682204	-2.60405	0.1899	0.761989	-2.39114	0.626501	-0.579061	1.01877	1.22431	3.15573	1.0157	-3.72664	1.66852	-1.86479	-1.09027	-0.0128229	1.0209	0.582768	-1.69272
colon-682-FMT_77	1.48269	-0.251451	1.62382	-3.7117	0.559749	-0.440204	#N/A	0.0511867	1.24204	#N/A	#N/A	3.19132	0.282712	0.778854	1.20364	0.636815	0.484261	0.484261	-0.0855012	-0.161358	0.197944	2.65793	0.797057	-0.52452	2.28132	0.376605	2.33793	-0.552317	-0.230483	-1.06038	-1.08973	0.134352	-1.80288	2.28715	0.00333338	-2.49826	-0.28397	0.840238	-0.988999	1.4929	0.493861	-0.594974	-3.29956	-0.373046	0.0716425	-0.544392	-0.87844	-0.863408	4.86933
colon-688-ATB_83	-0.260009	1.02242	-1.79997	-0.49112	3.76536	1.3186	3.3609	0.0675197	-2.61168	0.0174799	-1.37432	-2.46457	0.126139	-0.805096	1.26356	2.46181	-1.51335	-1.51335	-0.851365	-2.68985	-2.40044	-1.18144	-0.408044	0.146315	-3.89815	2.71672	-2.79669	-2.0437	0.907341	1.87505	1.50907	2.89825	2.47076	-3.98411	4.22837	1.63753	0.583989	-1.06419	0.713948	-1.23945	0.330585	1.91636	6.14604	4.89214	2.56834	0.285445	2.49588	2.92932	-4.31995
colon-687-SPF_82	-0.484204	-1.44956	2.35629	2.67027	-2.41489	0.529554	-6.3778	0.275653	2.14949	#N/A	#N/A	1.63867	0.269883	1.26687	-0.307959	3.80174	-0.563747	-0.563747	0.578876	4.06202	2.43852	0.320612	-0.320118	-1.02338	1.04998	-0.729371	-1.35487	1.11887	-1.4599	-2.15879	-2.58912	-1.33321	-3.66498	3.10124	-1.77213	-1.00547	-0.958834	-1.44153	-2.32783	-1.10919	-2.06053	2.2797	-1.06558	-3.37457	1.93948	-0.166308	-3.42229	-3.07279	-0.0170589
colon-679-FMT-AKK_74	1.15447	1.21119	-0.204223	-0.100296	-0.858334	0.216766	0.317185	-0.844609	1.88927	-1.76836	-2.2609	0.231751	0.394831	-1.97652	2.29375	-1.37882	0.946396	0.946396	0.357407	-0.946321	-1.05371	-0.562858	-0.197297	-0.667268	-3.67081	3.10796	1.95914	-0.418698	0.353976	-0.700893	-0.433792	0.0499119	0.333906	0.61249	-3.37267	-0.407413	0.424724	1.76192	0.437989	-3.70143	-0.101777	-0.105854	-1.44748	1.07675	0.453496	0.343717	0.326795	0.470417	1.31538
colon-673-FMT-AKK-Pas_68	-0.00646962	0.269566	-0.0782708	1.70514	-0.782083	-0.73765	1.96593	-1.06788	1.45841	-2.7266	-2.81923	-0.755376	-0.193037	-3.5433	1.9347	-1.67328	-0.356087	-0.356087	-0.90715	-0.887984	1.2892	-0.0678945	0.420808	-0.337672	-0.0573644	-0.0105301	-1.74027	-0.725582	0.328904	0.152553	0.240514	1.51808	-0.510369	0.154283	-1.18016	-1.50625	-0.0258494	-0.72252	-0.719517	-0.117087	-0.014925	0.441938	1.27707	1.52296	1.50268	-0.0965223	0.157358	-0.0266295	-2.46489
colon-691-ATB_86	-0.726467	0.944865	-2.28242	0.0531281	3.94246	1.48766	#N/A	-0.263953	-2.88629	0.999225	-0.0552068	-1.49547	0.388647	-0.912638	2.42056	2.55666	-1.45746	-1.45746	-0.672933	-3.21602	-2.36831	-0.987946	-0.3714	0.667868	-4.59094	3.603	-1.9333	-1.23832	0.37399	2.06615	1.62167	2.4702	2.21527	-3.67274	4.09924	1.06024	0.200303	-2.24569	0.933346	0.307302	0.256976	2.24264	3.67337	4.62893	1.69309	0.0157959	1.83139	2.06719	-3.10634
colon-678-FMT_73	1.86416	0.0814826	1.30142	-0.762572	-0.100214	-0.258627	-3.80354	-0.127234	1.37859	#N/A	#N/A	1.73244	-4.82801	0.916118	0.45445	1.43119	0.0566336	0.0566336	-0.131131	-0.200125	-2.25271	2.18534	0.509586	-1.10299	2.64829	-0.462954	0.533254	-0.199757	-0.0946657	-0.868373	-1.07806	0.539	-1.22991	1.28655	-0.123469	-3.25653	0.381107	0.521181	-0.708515	1.72281	0.224692	0.265703	-1.91201	0.655193	1.67266	-0.434024	-1.07896	-0.792496	3.07333
colon-677-FMT-AKK-Pas_72	-1.94386	-0.871619	0.372431	1.94454	0.204616	-0.91627	#N/A	0.0130975	-0.126008	1.66423	1.48452	-1.52689	0.463643	0.76846	-1.58084	-3.0394	2.03559	2.03559	0.685714	0.0301605	-2.49553	0.00492719	-0.285773	-0.675594	1.67052	-1.66559	1.37209	0.0306805	0.314121	0.818496	1.04179	-1.46059	1.52655	0.50904	-1.80961	2.34778	-0.923313	0.767038	0.945669	1.09011	0.82655	-4.56459	#N/A	-2.0666	-3.04188	-0.114979	1.89301	1.20281	#N/A
colon-693-SPF_88	-1.07733	-0.109882	-1.15693	-0.242209	-1.97836	-1.20794	1.6024	0.637061	-0.687343	#N/A	#N/A	1.25969	0.835685	1.36109	-1.69913	-1.81916	0.313796	0.313796	-0.109329	0.394476	2.51616	0.813239	-0.0442822	0.00122155	1.67047	-0.857228	-0.0169073	0.653776	1.23591	-0.427064	-0.137722	-1.58506	0.732697	-0.418901	-0.403332	1.5956	0.383971	-0.0456279	1.31256	2.01273	0.388122	0.648641	-2.32943	-2.04837	-1.59957	-0.0721082	-0.891632	-0.649373	2.18641
colon-672-FMT-AKK_67	0.838975	0.887793	0.233761	-0.380173	-0.240246	0.0463487	0.643777	-0.255583	2.14541	#N/A	#N/A	-1.01701	-5.5358	-1.13881	0.590679	0.143111	-0.600631	-0.600631	-0.617336	-0.706936	0.698047	-0.63292	0.414768	-0.912582	-2.42874	1.79582	-0.0341042	-0.370094	0.859153	-0.998753	-0.494366	2.139	-0.919766	0.319135	-2.23537	-1.44818	0.118087	-0.353221	-0.659264	-1.83571	0.0127966	0.886192	0.747473	1.81795	0.745995	-0.337109	0.343924	0.352689	-1.54509
colon-694-ATB_89	-0.676502	0.858023	-1.95155	-0.125467	4.27172	1.29565	4.09851	0.170315	-2.37799	1.03683	-0.00249887	-2.0175	-0.0111948	-0.478413	1.74575	1.4637	-1.88249	-1.88249	-0.501358	-3.22833	-2.4165	-0.811294	-0.572206	-0.333481	-4.38124	3.56995	-1.29566	-1.46103	0.369301	1.95485	0.658433	1.26096	1.66571	-3.54819	4.22319	2.06636	0.560056	-1.99383	0.2439	0.0155481	0.355758	2.11463	1.70201	3.82589	1.36374	0.00907784	1.15235	1.64492	-1.14941
colon-671-FMT-AKK-Pas_66	-1.47374	-0.518582	0.358103	0.280931	0.621216	-0.296957	-1.73157	0.680361	-0.513432	3.94485	4.48286	-2.01456	-0.228099	0.645822	-2.41036	-1.38398	1.43156	1.43156	1.62428	0.0936566	2.55273	-2.0437	0.198142	1.15934	2.03367	-4.07737	1.77445	1.38728	0.842193	0.0246078	1.73941	-1.17717	1.4678	-0.0362395	-0.714896	0.72555	-1.08914	2.26256	1.73314	-2.80959	1.69697	-3.0773	-0.472108	-1.98422	-2.37521	-1.52073	1.08243	0.97095	2.18505
colon-695-SPF_90	-0.846575	-0.644297	-0.173897	0.124076	-2.07661	-1.18403	-1.98904	1.13131	0.421454	#N/A	#N/A	1.24254	0.385571	1.387	-0.261027	-1.11724	-0.414402	-0.414402	-0.200634	1.92527	-1.82025	1.12545	-0.0928248	0.141492	2.69122	-1.56577	-0.734005	0.660896	-0.674778	-0.687515	-0.685481	-2.38615	-0.761328	0.346927	-0.406972	1.55526	-0.20824	0.884125	-0.220182	0.952509	-0.353165	0.365521	-2.04712	-1.26814	-1.31641	0.212245	-0.272404	0.0403216	1.76425
colon-674-FMT-AKK_69	0.877053	0.24279	0.73361	-0.0938682	-0.853376	-0.479322	2.0354	-0.484364	1.05626	0.247608	-0.879305	-1.96705	0.216571	-0.800447	0.153223	-1.94259	1.02534	1.02534	0.282801	-0.504765	2.94313	-0.965965	-0.632609	-0.871643	-5.04675	4.08079	4.98266	0.0308172	0.0348405	0.524549	-0.296245	-1.26483	0.551454	0.473886	-1.68296	1.37283	1.1949	0.139073	-0.410928	-0.281429	-0.00744033	-0.879996	0.403361	-0.597932	-1.0215	0.493509	0.602558	0.456667	-0.133619
colon-669-FMT_64	0.491562	-0.544416	1.75514	2.79331	-1.13341	0.630647	#N/A	-0.176334	2.24365	-1.57708	-0.749712	3.09943	0.679888	1.27904	0.94795	0.815226	0.846057	0.846057	0.840033	-0.0190877	5.10915	2.18699	0.71833	-1.22044	2.32718	-0.14019	2.86436	-0.411291	0.295926	-0.900815	-1.26814	0.287872	-1.44608	2.29214	1.36603	-2.04623	-0.181631	0.882547	-0.549935	0.82809	-0.293248	-1.53945	-2.51915	-0.891686	0.939876	-0.583757	-0.149984	-0.19	4.14094
[truncated: 2 more columns]
