# Supplementary material for: Oral administration of Akkermansia muciniphila elevates systemic antiaging and anticancer metabolites
Source: Aging (Albany NY). 2021 Mar 2;13(5):6375–405. doi: 10.18632/aging.202739 (PMC7993698; doi:10.18632/aging.202739)
Supplement: Supplementary Table 11 [file aging-13-202739-s012.xlsx]

## Sheet: SampleInfos
Supplementary Table 11. Related to Supplementary Figures 15, 18. Targeted metabolomics analysis from LIVER samples from mice receiving oral gavages with Akk or Akk-past.
Sid	sType	InjOrder	Grp	Color
BlM_pre	Bl	4	-	-
BlM_post	Bl	54	-	-
QC_liver_6a	QC	5	QC	#737373
QC_liver_8a	QC	6	QC	#737373
QC_liver_7a	QC	7	QC	#737373
QC_liver_6b	QC	15	QC	#737373
QC_liver_8b	QC	16	QC	#737373
QC_liver_7b	QC	17	QC	#737373
QC_liver_6c	QC	26	QC	#737373
QC_liver_8c	QC	27	QC	#737373
QC_liver_7c	QC	28	QC	#737373
QC_liver_6d	QC	36	QC	#737373
QC_liver_9a	QC	37	QC	#737373
QC_liver_7d	QC	39	QC	#737373
QC_liver_6e	QC	46	QC	#737373
QC_liver_9b	QC	50	QC	#737373
QC_liver_7e	QC	51	QC	#737373
QC_liver_8d	QC	52	QC	#737373
QC_liver_6f	QC	53	QC	#737373
liver-666-FMT_31	Sa	8	FMT Liver	#9E9AC8
liver-667-FMT-AKK-Pas_32	Sa	9	FMT AKK Pas Liver	#54278F
liver-684-SPF_49	Sa	10	SPF Liver	#74C476
liver-668-FMT-AKK_33	Sa	11	FMT AKK Liver	#7960AB
liver-690-ATB_55	Sa	12	ATB Liver	#FB6A4A
liver-681-FMT-AKK-Pas_46	Sa	13	FMT AKK Pas Liver	#54278F
liver-670-FMT_35	Sa	14	FMT Liver	#9E9AC8
liver-685-SPF_50	Sa	18	SPF Liver	#74C476
liver-675-FMT-AKK_40	Sa	19	FMT AKK Liver	#7960AB
liver-692-ATB_57	Sa	21	ATB Liver	#FB6A4A
liver-683-FMT_48	Sa	22	FMT Liver	#9E9AC8
liver-689-SPF_54	Sa	23	SPF Liver	#74C476
liver-680-FMT-AKK_45	Sa	24	FMT AKK Liver	#7960AB
liver-686-ATB_51	Sa	25	ATB Liver	#FB6A4A
liver-676-FMT-AKK-Pas_41	Sa	29	FMT AKK Pas Liver	#54278F
liver-682-FMT_47	Sa	30	FMT Liver	#9E9AC8
liver-688-ATB_53	Sa	31	ATB Liver	#FB6A4A
liver-687-SPF_52	Sa	32	SPF Liver	#74C476
liver-679-FMT-AKK_44	Sa	33	FMT AKK Liver	#7960AB
liver-673-FMT-AKK-Pas_38	Sa	34	FMT AKK Pas Liver	#54278F
liver-691-ATB_56	Sa	35	ATB Liver	#FB6A4A
liver-678-FMT_43	Sa	40	FMT Liver	#9E9AC8
liver-693-SPF_58	Sa	42	SPF Liver	#74C476
liver-672-FMT-AKK_37	Sa	43	FMT AKK Liver	#7960AB
liver-671-FMT-AKK-Pas_36	Sa	44	FMT AKK Pas Liver	#54278F
liver-694-ATB_59	Sa	45	ATB Liver	#FB6A4A
liver-669-FMT_34	Sa	47	FMT Liver	#9E9AC8
liver-695-SPF_60	Sa	48	SPF Liver	#74C476
liver-674-FMT-AKK_39	Sa	49	FMT AKK Liver	#7960AB
St_mix_pre	St	1	-	-
St_BA1_pre	St	2	-	-
St_BA2_pre	St	3	-	-
St_AA_post	St	20	-	-
St_AA_pre	St	38	-	-
St_mix_post	St	55	-	-
St_BA1_post	St	56	-	-
St_BA2_post	St	57	-	-

## Sheet: MetabolitesInfos
Analyte	MetName	RT	Class	MF	Mass	HMDB	KEGG	PC	Chebi	OGName	PCu	Method
2-hydroxybutyric acid@2.50-sf	2-hydroxybutyric acid	2.497	Organic acids	C4H8O3	104.047	HMDB00008	C05984	440864;11266	chebiId:1148;chebiId:50613	2-hydroxybutyric acid	11266	sf
2-hydroxyglutaric acid@13.18-gc	2-hydroxyglutaric acid	13.178	Organic acids	C5H8O5	148.037	HMDB00606;HMDB59655	C02630;C01087	43	chebiId:17084	2-hydroxyglutaric acid	43	gc
2-oxoglutaric acid@13.19-gc	2-oxoglutaric acid	13.188	Organic acids	C5H6O5	146.022	HMDB00208	C00026	51	chebiId:30915	2-oxoglutaric acid	51	gc
2-oxovaleric acid@14.57-sf	2-oxovaleric acid	14.574	-	-	-	-	-	-	-	-	-	sf
3-hydroxybutyric acid@1.67-sf	3-hydroxybutyric acid	1.666	Organic acids	C4H8O3	104.047	HMDB00357;HMDB00011	C01089	441;92135	chebiId:10983;chebiId:17066;chebiId:20067	3-hydroxybutyric acid	441	sf
3-methylhistidine@0.98-qppos	3-methylhistidine	0.976	Amino acids	C7H11N3O2	169.085	HMDB00479	C01152	64969;565965	chebiId:27596	3-methylhistidine	565965	qppos
4-hydroxymandelic acid@15.39-gc	4-hydroxymandelic acid	15.391	Unclassified	C8H8O4	168.042	HMDB00822	C11527	328	chebiId:16388	4-hydroxymandelic acid	328	gc
4-hydroxyproline@12.61-gc	4-hydroxyproline	12.61	Amino acids	C5H9NO3	131.058	HMDB00725	C01157	825;5810;5238478	chebiId:18095	4-hydroxyproline	5238478	gc
5-oxoproline@12.54-gc	5-oxoproline	12.542	Amino acids	C5H7NO3	129.043	HMDB00805;HMDB00267	C02237;C01879	439685;499;7405	chebiId:16010;chebiId:16924;chebiId:18183	5-oxoproline	499	gc
Acetic acid@1.79-sf	Acetic acid	1.793	Organic acids	C2H4O2	60.021	HMDB00042	C00033	176;21980959	chebiId:15366	Acetic acid	176	sf
Acetylcarnitine@1.23-qppos	Acetylcarnitine	1.233	Fatty Acyls	C9H17NO4	203.116	HMDB00201	C02571	7045767;439756;1	chebiId:15960;chebiId:57589	Acetylcarnitine	1	qppos
Acetylcholine@1.06-qppos	Acetylcholine	1.058	Unclassified	C7H15NO2	145.11	HMDB00895	C01996	187	chebiId:15355	Acetylcholine	187	qppos
Adenine@16.39-gc	Adenine	16.392	Bases	C5H5N5	135.054	HMDB00034	C00147	190	chebiId:16708	Adenine	190	gc
Alanine@7.03-gc	Alanine	7.033	Amino acids	C3H7NO2	89.048	HMDB01310;HMDB00161	C00133;C00041	71080;602;5950;7311724;57383916	chebiId:15570;chebiId:16977	Alanine	57383916	gc
Allantoin@1.09-qpneg	Allantoin	1.094	Organic acids	C4H6N4O3	158.044	HMDB00462	C02350;C01551	204;439714	chebiId:15678	Allantoin	204	qpneg
Alpha-muricholic acid@6.01-ba	Alpha-muricholic acid	6.011	Steroids	C24H40O5	408.288	HMDB00506	C17647	5283852;3083761	chebiId:81243	Alpha-muricholic acid	3083761	ba
Alpha-tocopherol@29.55-gc	Alpha-tocopherol	29.552	Prenols	C29H50O2	430.381	HMDB01893	C02477	14985;2116	chebiId:18145	Alpha-tocopherol	2116	gc
Anthranilic acid@13.61-gc	Anthranilic acid	13.606	Unclassified	C7H7NO2	137.048	HMDB01123	C00108	227;3734162	chebiId:30754	Anthranilic acid	227	gc
Arabinose@14.34-gc	Arabinose	14.342	Carbohydrates	C5H10O5	150.053	HMDB00646	C00216;C00259	66308;6902;439195	chebiId:17108;chebiId:46994	Arabinose	439195	gc
Arabitol@14.98-gc	Arabitol	14.983	Carbohydrates	C5H12O5	152.068	HMDB01851;HMDB00568	C00532;C01904	439255;94154	chebiId:18403;chebiId:18333	Arabitol	439255	gc
Arachidic acid@23.87-qpneg	Arachidic acid	23.873	Fatty Acyls	C20H40O2	312.303	HMDB02212	C06425	10467	chebiId:28822	Arachidic acid	10467	qpneg
Arachidonic acid@20.31-qpneg	Arachidonic acid	20.307	Fatty Acyls	C20H32O2	304.24	HMDB01043	C00219	444899;231	chebiId:15843	Arachidonic acid	231	qpneg
Arginine@0.98-qppos	Arginine	0.976	Amino acids	C6H14N4O2	174.112	HMDB03416;HMDB00517	C00792;C00062	71070;6322;59119146;232;5246487	chebiId:15816;chebiId:16467	Arginine	232	qppos
Asparagine@14.30-gc	Asparagine	14.297	Amino acids	C4H8N2O3	132.053	HMDB00168	C00152	236;6267;5247114	chebiId:17196	Asparagine	236	gc
Aspartic acid@12.54-gc	Aspartic acid	12.541	Amino acids	C4H7NO4	133.038	HMDB06483;HMDB00191	C00402;C00049	83887;5960;424;23443619;57397078	chebiId:17364;chebiId:17053	Aspartic acid	23443619	gc
Behenic acid@25.17-qpneg	Behenic acid	25.172	Fatty Acyls	C22H44O2	340.334	HMDB00944	C08281	8215	chebiId:23858;chebiId:28941	Behenic acid	8215	qpneg
Benzoic acid@8.94-gc	Benzoic acid	8.936	Unclassified	C7H6O2	122.037	HMDB01870	C00180	243;20144841	chebiId:30746	Benzoic acid	20144841	gc
Beta-alanine@11.33-gc	Beta-alanine	11.334	Amino acids	C3H7NO2	89.048	HMDB00056	C00099	239;4755801	chebiId:16958	Beta-alanine	239	gc
Beta-muricholic acid@6.30-ba	Beta-muricholic acid	6.298	Steroids	C24H40O5	408.288	HMDB00415	C17726	5283853;3083762	chebiId:81298	Beta-muricholic acid	3083762	ba
Cadaverine@4.75-pa	Cadaverine	4.749	Unclassified	C5H14N2	102.116	HMDB02322	C01672	273	chebiId:18127	Cadaverine	273	pa
Capric acid@11.63-gc	Capric acid	11.628	Fatty Acyls	C10H20O2	172.146	HMDB00511	C01571	2969	chebiId:30813	Capric acid	2969	gc
Caprylic acid@9.12-gc	Caprylic acid	9.12	Fatty Acyls	C8H16O2	144.115	HMDB00482	C06423	379	chebiId:28837	Caprylic acid	379	gc
Carnitine@1.00-qppos	Carnitine	0.999	Organic acids	C7H15NO3	161.105	HMDB00062	C00318;C00487;C15025	10917;288;85;2724480	chebiId:16347;chebiId:3424;chebiId:11060	Carnitine	288	qppos
Carnitine C10:0@12.24-qppos	Carnitine C10:0	12.243	Fatty Acyls	C17H33NO4	315.241	HMDB00651	-	10245190	-	Carnitine C10:0	10245190	qppos
Carnitine C10:1@11.45-qppos	Carnitine C10:1	11.449	Fatty Acyls	C17H31NO4	313.225	HMDB13205	-	53481651	-	Carnitine C10:1	53481651	qppos
Carnitine C12:0@14.00-qppos	Carnitine C12:0	14	Fatty Acyls	C19H37NO4	343.272	HMDB02250	-	168381	-	Carnitine C12:0	168381	qppos
Carnitine C12:1@10.61-qppos	Carnitine C12:1	10.612	Fatty Acyls	C19H35NO4	341.257	HMDB13326	-	53481671	-	Carnitine C12:1	53481671	qppos
Carnitine C14:0(OH)@13.73-qppos	Carnitine C14:0(OH)	13.73	Fatty Acyls	C21H41NO5	387.298	HMDB13166;HMDB61640	-	53481642	-	Carnitine C14:0(OH)	53481642	qppos
Carnitine C14:1@14.74-qppos	Carnitine C14:1	14.735	Fatty Acyls	C21H39NO4	369.288	HMDB13329;HMDB02014	-	22833575;53481677	-	Carnitine C14:1	22833575	qppos
Carnitine C14:2@13.95-qppos	Carnitine C14:2	13.947	Fatty Acyls	C21H37NO4	367.272	HMDB13331	-	53481681	-	Carnitine C14:2	53481681	qppos
Carnitine C16:0@17.32-qppos	Carnitine C16:0	17.322	Fatty Acyls	C23H45NO4	399.335	HMDB00222	C02990	461;11953816	chebiId:17490	Carnitine C16:0	461	qppos
Carnitine C16:0(OH)@15.28-qppos	Carnitine C16:0(OH)	15.283	Fatty Acyls	C23H45NO5	415.33	HMDB13337;HMDB13336	-	53481693;53481691	-	Carnitine C16:0(OH)	53481691	qppos
Carnitine C16:1@16.19-qppos	Carnitine C16:1	16.189	Fatty Acyls	C23H43NO4	397.319	HMDB13207;HMDB06317	-	53477817;53481653	-	Carnitine C16:1	53477817	qppos
Carnitine C18:0@19.08-qppos	Carnitine C18:0	19.077	Fatty Acyls	C25H49NO4	427.366	HMDB00848	-	6426855	-	Carnitine C18:0	6426855	qppos
Carnitine C18:1@17.76-qppos	Carnitine C18:1	17.759	Fatty Acyls	C25H47NO4	425.351	HMDB05065	-	53477789	-	Carnitine C18:1	53477789	qppos
Carnitine C18:2@16.80-qppos	Carnitine C18:2	16.802	Fatty Acyls	C25H45NO4	423.335	HMDB06469;HMDB06461	-	6450015;53477834	-	Carnitine C18:2	53477834	qppos
Carnitine C3:0@1.58-qppos	Carnitine C3:0	1.584	Fatty Acyls	C10H19NO4	217.131	HMDB00824	C03017	107738	chebiId:28867	Carnitine C3:0	107738	qppos
Carnitine C4:0@2.62-qppos	Carnitine C4:0	2.622	Fatty Acyls	C11H21NO4	231.147	HMDB00736	-	10177002;439829	-	Carnitine C4:0	10177002	qppos
Carnitine C4:0(OH)@1.42-qppos	Carnitine C4:0(OH)	1.421	Fatty Acyls	C11H21NO5	247.142	HMDB13127	-	53481617	-	Carnitine C4:0(OH)	53481617	qppos
Carnitine C5:0@5.23-qppos	Carnitine C5:0	5.234	Fatty Acyls	C12H23NO4	245.163	HMDB00688	-	6426851	-	Carnitine C5:0	6426851	qppos
Carnitine C6:0@7.53-qppos	Carnitine C6:0	7.525	Fatty Acyls	C13H25NO4	259.178	HMDB00705	-	6426853;3246938	-	Carnitine C6:0	6426853	qppos
Carnitine C8:0@10.22-qppos	Carnitine C8:0	10.219	Fatty Acyls	C15H29NO4	287.21	HMDB00791	C02838	11953814	chebiId:18102	Carnitine C8:0	11953814	qppos
Carnosine@0.98-qppos	Carnosine	0.976	Peptides	C9H14N4O3	226.107	HMDB00033	C00386	439224;9369;5249653	chebiId:15727	Carnosine	5249653	qppos
Cholesterol@29.67-gc	Cholesterol	29.673	Steroids	C27H46O	386.355	HMDB00067	C00187	6432564;5997	chebiId:16113	Cholesterol	5997	gc
Cholic acid@9.16-ba	Cholic acid	9.158	Steroids	C24H40O5	408.288	HMDB00619	C00695;C01558	221493;303;439520	chebiId:16359;chebiId:22868;chebiId:3098	Cholic acid	303	ba
Choline phosphate@1.00-qppos	Choline phosphate	0.997	Unclassified	C5H14NO4P	183.066	HMDB01565	C00588	135437;1014	chebiId:18132	Choline phosphate	135437	qppos
Citric acid;Isocitric acid@15.98-gc	Citric acid;Isocitric acid	15.98	Organic acids	C6H8O7	192.027	HMDB00094;HMDB00193	C00158;C00311	311;19782904;88113319;1198	chebiId:30769;chebiId:30887	Citric acid;Isocitric acid	19782904;1198	gc
Citrulline@15.94-gc	Citrulline	15.944	Amino acids	C6H13N3O3	175.096	HMDB00904	C00327	833;9750;25244873	chebiId:16349	Citrulline	25244873	gc
Creatine@12.98-gc	Creatine	12.978	Amino acids	C4H9N3O2	131.069	HMDB00064	C00300	586	chebiId:16919	Creatine	586	gc
Creatinine@1.02-qppos	Creatinine	1.015	Amino acids	C4H7N3O	113.059	HMDB00562	C00791	588	chebiId:16737	Creatinine	588	qppos
Cytidine@1.17-qppos	Cytidine	1.168	Nucleosides	C9H13N3O5	243.086	HMDB00089	C00475	6175;596	chebiId:17562	Cytidine	596	qppos
Cytosine@1.35-qppos	Cytosine	1.345	Bases	C4H5N3O	111.043	HMDB00630	C00380	597	chebiId:16040	Cytosine	597	qppos
Deoxycholic acid@10.50-ba	Deoxycholic acid	10.504	Steroids	C24H40O4	392.293	HMDB00626	C11171;C04483	222528;2987;23668196	chebiId:9177;chebiId:28834	Deoxycholic acid	2987	ba
Dimethylarginine@1.02-qppos	Dimethylarginine	1.017	Amino acids	C8H18N4O2	202.143	HMDB01539;HMDB03334	C03626	123831	chebiId:17929	Dimethylarginine	123831	qppos
Dimethylglycine@1.02-qppos	Dimethylglycine	1.018	Amino acids	C4H9NO2	103.063	HMDB00092	C01026	673	chebiId:17724	Dimethylglycine	673	qppos
Docosadienoic acid@23.05-qpneg	Docosadienoic acid	23.048	Fatty Acyls	C22H40O2	336.303	-	C16533	5282807;5312554	chebiId:75117	Docosadienoic acid	5282807	qpneg
Docosahexaenoic acid@20.27-qpneg	Docosahexaenoic acid	20.267	Fatty Acyls	C22H32O2	328.24	HMDB02183	C06429	445580	chebiId:28125	Docosahexaenoic acid	445580	qpneg
Docosapentaenoic acid@20.69-qpneg	Docosapentaenoic acid	20.688	Fatty Acyls	C22H34O2	330.256	HMDB01976;HMDB06528	C16513	6441454;5497182;3035421	chebiId:53488	Docosapentaenoic acid	3035421	qpneg
Docosatetraenoic acid@21.40-qpneg	Docosatetraenoic acid	21.399	-	-	-	-	-	-	-	-	-	qpneg
Docosatrienoic acid@22.23-qpneg	Docosatrienoic acid	22.225	Fatty Acyls	C22H38O2	334.287	HMDB02823	C16534	5312556	chebiId:80549	Docosatrienoic acid	5312556	qpneg
Docosenoic acid@24.00-qpneg	Docosenoic acid	24	Fatty Acyls	C22H42O2	338.318	HMDB02068	C08316	5281116	chebiId:28792	Docosenoic acid	5281116	qpneg
Dodecenoic acid@16.81-qpneg	Dodecenoic acid	16.806	Fatty Acyls	C12H22O2	198.162	HMDB00529;HMDB10729;HMDB32248	-	5312378;5282729;125207	-	Dodecenoic acid	125207	qpneg
Eicosadienoic acid@21.72-qpneg	Eicosadienoic acid	21.717	Fatty Acyls	C20H36O2	308.272	HMDB05060	C16525	6439848	chebiId:73731	Eicosadienoic acid	6439848	qpneg
Eicosapentaenoic acid@19.59-qpneg	Eicosapentaenoic acid	19.585	Fatty Acyls	C20H30O2	302.225	HMDB01999	C06428	446284	chebiId:28364	Eicosapentaenoic acid	446284	qpneg
Eicosatrienoic acid@20.89-qpneg	Eicosatrienoic acid	20.892	Fatty Acyls	C20H34O2	306.256	HMDB60039	C16522	5312529	chebiId:53460	Dihomo-linolenic acid	5312529	qpneg
Eicosenoic acid@22.67-qpneg	Eicosenoic acid	22.675	Fatty Acyls	C20H38O2	310.287	HMDB02231	C16526	5282768	chebiId:32425	Eicosenoic acid	5282768	qpneg
Erythritol@12.47-gc	Erythritol	12.467	Carbohydrates	C4H10O4	122.058	HMDB02994	C00503	222285;8998	chebiId:17113;chebiId:48299	Erythritol	8998	gc
FAD@7.47-qppos	FAD	7.469	Nucleotides	C27H33N9O15P2	785.157	HMDB01248	C00016	643975;703	chebiId:16238	FAD	703	qppos
Ferulic acid@19.52-gc	Ferulic acid	19.525	Flavonoids	C10H10O4	194.058	HMDB00537;HMDB00954	C01494	445858;709	chebiId:17620	Ferulic acid	445858	gc
FMN@7.72-qpneg	FMN	7.72	Nucleotides	C17H21N4O9P	456.105	HMDB01520	C00061	710;643976	chebiId:17621	FMN	710	qpneg
Fructose@16.68-gc	Fructose	16.677	Carbohydrates	C6H12O6	180.063	HMDB00660	C00095;C02336	5984;439163;439709	chebiId:15824;chebiId:37721;chebiId:28645	Fructose	439163	gc
Fumaric acid@10.24-gc	Fumaric acid	10.24	Organic acids	C4H4O4	116.011	HMDB00134	C00122	444972	chebiId:18012	Fumaric acid	444972	gc
GABA@12.62-gc	GABA	12.62	Amino acids	C4H9NO2	103.063	HMDB00112	C00334	119;6992099	chebiId:16865	GABA	119	gc
Galactitol;Sorbitol;Mannitol@17.52-gc	Galactitol;Sorbitol;Mannitol	17.522	Carbohydrates	C6H14O6	182.079	HMDB00107;HMDB00765;HMDB00247	C01697;C00392;C00794	11850;6251;5780	chebiId:16813;chebiId:16899;chebiId:17924	Galactitol;Mannitol;Sorbitol	11850;6251;5780	gc
Galactose;Glucose;Mannose@17.06-gc	Galactose;Glucose;Mannose	17.059	Carbohydrates	C6H12O6	180.063	HMDB00143;HMDB33704;HMDB00122;HMDB03345;HMDB00516;HMDB00169	C00124;C01582;C00984;C01825;C00031;C00267;C00221;C00159	439357;6036;3037556;12003287;79025;5793;206;64689;161658;18950	chebiId:4139;chebiId:28061;chebiId:28260;chebiId:42905;chebiId:4167;chebiId:17925;chebiId:15903;chebiId:4208	Galactose;Glucose;Mannose	12003287;206;161658	gc
Gamma-glutamylleucine@3.22-qppos	Gamma-glutamylleucine	3.22	Peptides	C11H20N2O5	260.137	HMDB11171	-	151023	-	Gamma-glutamylleucine	151023	qppos
Gamma-glutamyllysine@1.00-qppos	Gamma-glutamyllysine	0.995	-	-	-	-	-	-	-	-	-	qppos
Gamma-glutamylthreonine@1.10-qppos	Gamma-glutamylthreonine	1.1	Peptides	C9H16N2O6	248.101	HMDB28829	-	6998031	-	Gamma-glutamylthreonine	6998031	qppos
Gamma-glutamyltryptophan@6.58-qppos	Gamma-glutamyltryptophan	6.582	-	-	-	-	-	-	-	-	-	qppos
Gamma-glutamyltyrosine@2.77-qppos	Gamma-glutamyltyrosine	2.767	Peptides	C14H18N2O6	310.116	HMDB11741	-	94340	-	Gamma-glutamyltyrosine	94340	qppos
Glucuronic acid;Galacturonic acid@1.03-qpneg	Glucuronic acid;Galacturonic acid	1.026	Carbohydrates	C6H10O7	194.043	HMDB02545;HMDB03402;HMDB00127	C08348;C00333;C00191	84740;152867;19770757;441476;439215;94715;444791;610	chebiId:33830;chebiId:47954;chebiId:12952;chebiId:4153;chebiId:4178;chebiId:47952	Galacturonic acid;Glucuronic acid	152867;610	qpneg
Glutamic acid@13.70-gc	Glutamic acid	13.7	Amino acids	C5H9NO4	147.053	HMDB03339;HMDB00148	C00025;C00302;C00217	611;33032;57397101;23327	chebiId:16015;chebiId:15966;chebiId:18327	Glutamic acid	57397101	gc
Glutamine@15.44-gc	Glutamine	15.442	Amino acids	C5H10N2O3	146.069	HMDB00641;HMDB03423	C00064;C00819	5961;145815;25244553;738	chebiId:18050;chebiId:17061	Glutamine	25244553	gc
Glutathione@1.30-qppos	Glutathione	1.298	Peptides	C10H17N3O6S	307.084	HMDB00125	C00051	124886;745;60072620	chebiId:16856	Glutathione	60072620	qppos
Glyceric acid@10.13-gc	Glyceric acid	10.132	Carbohydrates	C3H6O4	106.027	HMDB00139	C00258	752;439194	chebiId:32398	Glyceric acid	752	gc
Glycerol@9.37-gc	Glycerol	9.367	Carbohydrates	C3H8O3	92.047	HMDB00131	C00116	753	chebiId:17754	Glycerol	753	gc
Glycerol-3-phosphate@15.40-gc	Glycerol-3-phosphate	15.398	Lipids	C3H9O6P	172.014	HMDB00126	C00093	754;439162	chebiId:15978	Glycerol-3-phosphate	754	gc
Glycerophosphorylcholine@1.02-qppos	Glycerophosphorylcholine	1.016	Lipids	C8H20NO6P	257.103	HMDB00086	C00670	657272;439285;11234	chebiId:16870	Glycerophosphorylcholine	11234	qppos
Glycine@9.78-gc	Glycine	9.783	Amino acids	C2H5NO2	75.032	HMDB00123	C00037	750;5257127	chebiId:15428	Glycine	5257127	gc
Glycolic acid@6.37-gc	Glycolic acid	6.366	Organic acids	C2H4O3	76.016	HMDB00115	C00160	757;3698251	chebiId:17497	Glycolic acid	3698251	gc
Glycylglycine@0.99-qppos	Glycylglycine	0.993	Peptides	C4H8N2O3	132.053	HMDB11733	C02037	11163;1548897	chebiId:17201	Glycylglycine	11163	qppos
Guanine@20.34-gc	Guanine	20.339	Bases	C5H5N5O	151.049	HMDB00132	C00242	764	chebiId:16235	Guanine	764	gc
Heptadecenoic acid@20.58-qpneg	Heptadecenoic acid	20.576	Fatty Acyls	C17H32O2	268.24	HMDB31046;HMDB60038	C16536	5312435;5312440	chebiId:80550	Heptadecenoic acid	5312435	qpneg
Hexadecadienoic acid@18.97-qpneg	Hexadecadienoic acid	18.968	Fatty Acyls	C16H28O2	252.209	HMDB00477	-	13932172	-	Hexadecadienoic acid	13932172	qpneg
Hexadecanedioic acid@16.59-qpneg	Hexadecanedioic acid	16.592	Fatty Acyls	C16H30O4	286.214	HMDB00672	C19615	10459	chebiId:73722	Hexadecanedioic acid	10459	qpneg
Hexanoylglycine*@7.08-qpneg	Hexanoylglycine*	7.08	-	-	-	-	-	-	-	-	-	qpneg
Hippuric acid@5.97-qpneg	Hippuric acid	5.967	Unclassified	C9H9NO3	179.058	HMDB00714	C01586	464	chebiId:18089	Hippuric acid	464	qpneg
Histidine@17.08-gc	Histidine	17.077	Amino acids	C6H9N3O2	155.069	HMDB00177	C00135	6274;773;3651426	-	Histidine	3651426	gc
Homoserine@1.00-qppos	Homoserine	0.996	Amino acids	C4H9NO3	119.058	HMDB00719	C00263	12647;1502076;779;25245858;193314	chebiId:15699	Homoserine	193314	qppos
Hypotaurine@13.47-gc	Hypotaurine	13.474	Organic acids	C2H7NO2S	109.02	HMDB00965	C00519	107812;25244088	chebiId:16668	Hypotaurine	107812	gc
Hypoxanthine@15.75-gc	Hypoxanthine	15.747	Bases	C5H4N4O	136.039	HMDB00157	C00262	790	chebiId:17368	Hypoxanthine	790	gc
Indole-2-carboxylic acid@10.48-qpneg	Indole-2-carboxylic acid	10.477	Indoles	C9H7NO2	161.048	HMDB02285	-	72899	-	Indole-2-carboxylic acid	72899	qpneg
Indole-3-aldehyde@9.59-qpneg	Indole-3-aldehyde	9.595	-	-	-	-	-	-	-	-	-	qpneg
Indole-3-lactic acid@8.35-qpneg	Indole-3-lactic acid	8.353	Indoles	C11H11NO3	205.074	HMDB00671	C02043	92904	chebiId:17282;chebiId:24813	Indole-3-lactic acid	92904	qpneg
Indole-3-propionic acid@10.93-qpneg	Indole-3-propionic acid	10.928	Indoles	C11H11NO2	189.079	HMDB02302	-	3744	-	Indole-3-propionic acid	3744	qpneg
Inosine@25.09-gc	Inosine	25.089	Nucleosides	C10H12N4O5	268.081	HMDB00195	C00294	6021	chebiId:17596	Inosine	6021	gc
Inositol@19.94-gc	Inositol	19.944	Unclassified	C6H12O6	180.063	HMDB06088;HMDB00211	C06153;C00137;C19891	892	chebiId:10642;chebiId:17268	Inositol	892	gc
Isoleucine@9.61-gc	Isoleucine	9.609	Amino acids	C6H13NO2	131.095	HMDB00172	C00407	791;6306	chebiId:17191	Isoleucine	791	gc
Ketoisocaproic acid@8.53-gc	Ketoisocaproic acid	8.53	Organic acids	C6H10O3	130.063	HMDB00695	C00233	70	chebiId:48430	Ketoisocaproic acid	70	gc
Kynurenine@21.46-gc	Kynurenine	21.459	Unclassified	C10H12N2O3	208.085	HMDB00684	C00328	846;161166;25245862	chebiId:16946	Kynurenine	25245862	gc
Lactic acid@6.49-gc	Lactic acid	6.49	Organic acids	C3H6O3	90.032	HMDB01311;HMDB00190	C00256;C00186	61503;107689;19789253;612	chebiId:341;chebiId:42111;chebiId:422	Lactic acid	19789253	gc
Lactose@27.38-gc	Lactose	27.381	Carbohydrates	C12H22O11	342.116	HMDB00186	C00243	84571;440995	chebiId:17716	Lactose	440995	gc
Lauric acid@13.94-gc	Lauric acid	13.942	Fatty Acyls	C12H24O2	200.178	HMDB00638	C02679	3893	chebiId:30805	Lauric acid	3893	gc
Leucine@9.31-gc	Leucine	9.309	Amino acids	C6H13NO2	131.095	HMDB00687	C00123	6106;857;5255803	chebiId:15603	Leucine	5255803	gc
Leucylproline@0.99-qppos	Leucylproline	0.988	Peptides	C11H20N2O3	228.147	HMDB11175	-	44369311	-	Leucylproline	44369311	qppos
Linoleic acid@20.35-qpneg	Linoleic acid	20.354	Fatty Acyls	C18H32O2	280.24	HMDB00673	C01595	5280450;3931	chebiId:17351	Linoleic acid	3931	qpneg
Linolenic acid@19.59-qpneg	Linolenic acid	19.589	Fatty Acyls	C18H30O2	278.225	HMDB01388	C06427	5280934;860	chebiId:27432	Linolenic acid	5280934	qpneg
Lysine@17.08-gc	Lysine	17.079	Amino acids	C6H14N2O2	146.106	HMDB03405;HMDB00182	C00739;C00047	57449;5962;866;5248709	chebiId:16855;chebiId:18019	Lysine	5248709	gc
Malic acid@12.15-gc	Malic acid	12.154	Organic acids	C4H6O5	134.022	HMDB00156;HMDB00744	C00149;C00711	525;20130941;222656	chebiId:30797;chebiId:6650	Malic acid	20130941	gc
Malonylcarnitine@1.17-qppos	Malonylcarnitine	1.165	Fatty Acyls	C10H17NO6	247.106	HMDB02095	-	22833583	-	Malonylcarnitine	22833583	qppos
Maltose;Trehalose@27.72-gc	Maltose;Trehalose	27.719	Carbohydrates	C12H22O11	342.116	HMDB00163;HMDB00975	C00208;C01083	439341;6255;439186;294;7427;1143	chebiId:17306;chebiId:16551	Maltose;Trehalose	294;1143	gc
Mannitol@1.03-qpneg	Mannitol	1.027	Carbohydrates	C6H14O6	182.079	HMDB00765	C00392	6251	chebiId:16899	Mannitol	6251	qpneg
Margaric acid@20.27-gc	Margaric acid	20.267	Fatty Acyls	C17H34O2	270.256	HMDB02259	-	10465	-	Margaric acid	10465	gc
Methionine@12.49-gc	Methionine	12.493	Amino acids	C5H11NO2S	149.051	HMDB00696	C00073	6137;876;5255805	chebiId:16643	Methionine	5255805	gc
Methyl-indole-3-acetic-acid@10.92-qpneg	Methyl-indole-3-acetic-acid	10.923	-	-	-	-	-	-	-	-	-	qpneg
Methylmalonic acid@1.55-qpneg	Methylmalonic acid	1.55	Organic acids	C4H6O4	118.027	HMDB00202	C02170	487	chebiId:30860	Methylmalonic acid	487	qpneg
Methylsuccinic acid@9.99-gc	Methylsuccinic acid	9.993	Fatty Acyls	C5H8O4	132.042	HMDB01844	-	10349	-	Methylsuccinic acid	10349	gc
Myristic acid@19.39-qpneg	Myristic acid	19.395	Fatty Acyls	C14H28O2	228.209	HMDB00806	C06424	11005	chebiId:28875;chebiId:30807	Myristic acid	11005	qpneg
Myristoleic acid@18.31-qpneg	Myristoleic acid	18.313	Fatty Acyls	C14H26O2	226.193	HMDB02000	C08322	5281119	chebiId:27781	Myristoleic acid	5281119	qpneg
N-acetylglutamine@1.44-qppos	N-acetylglutamine	1.442	Amino acids	C7H12N2O4	188.08	HMDB06029	-	182230	chebiId:17008	N-acetylglutamine	182230	qppos
N-acetylputrescine@15.16-gc	N-acetylputrescine	15.162	Organic acids	C6H14N2O	130.111	HMDB02064	C02714	122356	chebiId:17768	N-acetylputrescine	122356	gc
N1-acetylspermidine@5.38-pa	N1-acetylspermidine	5.383	Amino acids	C9H21N3O	187.168	HMDB01276	C00612	496	chebiId:17927	N-acetylspermine	496	pa
N1-acetylspermine@6.78-pa	N1-acetylspermine	6.781	Amino acids	C12H28N4O	244.226	HMDB01186	C02567	916	chebiId:17312	N-acetylspermine	916	pa
N6-acetyllysine;N2-acetyllysine@1.26-qppos	N6-acetyllysine;N2-acetyllysine	1.256	Amino acids	C8H16N2O3	188.116	HMDB00446;HMDB00206	C12989;C02727	92907;265949;92832	chebiId:35704;chebiId:17752	N2-acetyllysine;N6-acetyllysine	92907;265949	qppos
N8-acetylspermidine@5.57-pa	N8-acetylspermidine	5.574	Amino acids	C9H21N3O	187.168	HMDB02189	C01029	123689	chebiId:27911	N-acetylspermidine	123689	pa
NAAG@1.78-qppos	NAAG	1.78	Peptides	C11H16N2O8	304.091	HMDB01067	C12270	5255;188803	chebiId:73688	NAAG	5255	qppos
Niacinamide@2.38-qppos	Niacinamide	2.381	Unclassified	C6H6N2O	122.048	HMDB01406	C00153	936	chebiId:17154	Niacinamide	936	qppos
Nicotinic acid@9.61-gc	Nicotinic acid	9.613	Unclassified	C6H5NO2	123.032	HMDB01488	C00253	938;117629482	chebiId:15940	Nicotinic acid	117629482	gc
Nonadecanoic acid@23.17-qpneg	Nonadecanoic acid	23.171	Fatty Acyls	C19H38O2	298.287	HMDB00772	C16535	12591	chebiId:39246	Nonadecanoic acid	12591	qpneg
Nonadecenoic acid@22.00-qpneg	Nonadecenoic acid	21.997	Fatty Acyls	C19H36O2	296.272	HMDB13622	-	5312513	chebiId:37527	Nonadecenoic acid	5312513	qpneg
Nonanoic acid@10.39-gc	Nonanoic acid	10.39	Fatty Acyls	C9H18O2	158.131	HMDB00847	C01601	8158	chebiId:29019	Nonanoic acid	8158	gc
O-phosphoethanolamine@15.57-gc	O-phosphoethanolamine	15.575	Organic acids	C2H8NO4P	141.019	HMDB00224	C00346	1015;5232324	chebiId:17553	O-phosphoethanolamine	1015	gc
Oleic acid;Elaidic acid;Vaccenic acid@21.29-qpneg	Oleic acid;Elaidic acid;Vaccenic acid	21.294	Fatty Acyls	C18H34O2	282.256	HMDB00573;HMDB00207;HMDB03231	C01712;C00712;C08367	637517;445639;5282761;5281127	chebiId:27997;chebiId:16196;chebiId:28727	Oleic acid;Elaidic acid;Vaccenic acid	637517;445639;5281127	qpneg
Omega-muricholic acid@5.89-ba	Omega-muricholic acid	5.888	Steroids	C24H40O5	408.288	HMDB00364	C17727	5283851	chebiId:81299	omega-muricholic acid	5283851	ba
Ornithine@2.24-pa	Ornithine	2.243	Amino acids	C5H12N2O2	132.09	HMDB03374;HMDB00214	C00077;C00515	6262;389;71082	chebiId:15729;chebiId:16176	Ornithine	389	pa
Ox. glutathione@1.43-qppos	Ox. glutathione	1.426	Peptides	C20H32N6O12S2	612.152	HMDB03337	C00127	65359;975;5255796	chebiId:17858	Ox. glutathione	5255796	qppos
Palmitic acid@20.96-qpneg	Palmitic acid	20.958	Fatty Acyls	C16H32O2	256.24	HMDB00220	C00249	985	chebiId:15756	Palmitic acid	985	qpneg
Palmitoleic acid@19.83-qpneg	Palmitoleic acid	19.833	Fatty Acyls	C16H30O2	254.225	HMDB03229	C08362	445638;4668	chebiId:28716	Palmitoleic acid	445638	qpneg
Pantothenic acid@18.07-gc	Pantothenic acid	18.073	Amino acids	C9H17NO5	219.111	HMDB00210	C00864	6613;988	chebiId:29032;chebiId:46905;chebiId:7916	Pantothenic acid	988	gc
PCae(12:0)@15.59-qppos	PCae(12:0)	15.59	-	-	-	-	-	-	-	-	-	qppos
PCae(14:0)@15.53-qppos	PCae(14:0)	15.534	Lipids	C22H46NO7P	467.301	HMDB10379	-	460604;24779490	-	PCae(14:0)	24779490	qppos
PCae(15:0)@16.29-qppos	PCae(15:0)	16.294	Lipids	C23H48NO7P	481.317	HMDB10381	-	24779458	-	PCae(15:0)	24779458	qppos
PCae(16:0)@17.15-qppos	PCae(16:0)	17.145	Lipids	C24H50NO7P	495.332	HMDB10382	-	460602;9827122;15061532;10097314;86554	-	PCae(16:0)	86554	qppos
PCae(16:1)@16.06-qppos	PCae(16:1)	16.058	Lipids	C24H48NO7P	493.317	HMDB10383	-	24779461;24779462;24779460	-	PCae(16:1)	24779462	qppos
PCae(17:0)@17.94-qppos	PCae(17:0)	17.94	Lipids	C25H52NO7P	509.348	HMDB12108	-	24779463;24779464	-	PCae(17:0)	24779464	qppos
PCae(18:0)@18.91-qppos	PCae(18:0)	18.906	Lipids	C26H54NO7P	523.364	HMDB11128;HMDB10384	-	497299;24779491;18684067;86556;10436817;10208382	-	PCae(18:0)	10208382	qppos
PCae(18:1)@17.61-qppos	PCae(18:1)	17.614	Lipids	C26H52NO7P	521.348	HMDB10385;HMDB02815	-	16081932;53480465;24779493;6449974;24779492;10279683;24779465;24779466;6030826;15120177;24779494	-	PCae(18:1)	10279683	qppos
PCae(18:2)@16.57-qppos	PCae(18:2)	16.571	Lipids	C26H50NO7P	519.332	HMDB10386	-	11005824;24779467;11988421	-	PCae(18:2)	11988421	qppos
PCae(18:3)@15.91-qppos	PCae(18:3)	15.913	Lipids	C26H48NO7P	517.317	HMDB10387;HMDB10388	-	52924045;24779469	-	PCae(18:3)	24779469	qppos
PCae(20:0)@20.86-qppos	PCae(20:0)	20.865	Lipids	C28H58NO7P	551.395	HMDB10390	-	24779473	-	PCae(20:0)	24779473	qppos
PCae(20:1)@19.32-qppos	PCae(20:1)	19.319	Lipids	C28H56NO7P	549.379	HMDB10391	-	52924051	-	PCae(20:1)	52924051	qppos
PCae(20:2)@18.21-qppos	PCae(20:2)	18.208	Lipids	C28H54NO7P	547.364	HMDB10392	-	52924053	-	PCae(20:2)	52924053	qppos
PCae(22:4)@17.92-qppos	PCae(22:4)	17.918	Lipids	C30H54NO7P	571.364	HMDB10401	-	52924039	-	PCae(22:4)	52924039	qppos
PCae(22:6)@16.78-qppos	PCae(22:6)	16.776	Lipids	C30H50NO7P	567.332	HMDB10404	-	10415542	-	PCae(22:6)	10415542	qppos
PCee(16:0)@18.03-qppos	PCee(16:0)	18.028	Lipids	C24H52NO6P	481.353	-	-	-	-	PCee(16:0)	-	qppos
Pentadecanoic acid@20.19-qpneg	Pentadecanoic acid	20.188	Fatty Acyls	C15H30O2	242.225	HMDB00826	C16537	13849	chebiId:42504	Pentadecanoic acid	13849	qpneg
Phenylalanine@13.78-gc	Phenylalanine	13.78	Amino acids	C9H11NO2	165.079	HMDB00159	C00079	6140;994;57397115	chebiId:17295	Phenylalanine	57397115	gc
Phosphoenolpyruvic acid@13.56-gc	Phosphoenolpyruvic acid	13.556	Organic acids	C3H5O6P	167.982	HMDB00263	C00074	1005	chebiId:18021;chebiId:44897	Phosphoenolpyruvic acid	1005	gc
Phosphoric acid@9.39-gc	Phosphoric acid	9.392	Unclassified	H3O4P	97.977	HMDB01429;HMDB02142	C00009	1004	chebiId:18367;chebiId:26078	Phosphoric acid	1004	gc
Phosphoserine@0.97-qppos	Phosphoserine	0.975	Amino acids	C3H8NO6P	185.009	HMDB00272;HMDB01721	C01005	68841;106	chebiId:15811	Phosphoserine	106	qppos
Proline@9.65-gc	Proline	9.647	Amino acids	C5H9NO2	115.063	HMDB03411;HMDB00162	C00763;C00148	8988;145742;25246272;614	chebiId:16313;chebiId:17203	Proline	25246272	gc
Proline betaine@1.21-qppos	Proline betaine	1.212	Amino acids	C7H13NO2	143.095	HMDB04827	C10172	115244	chebiId:35280	Proline betaine	115244	qppos
Putrescine@4.74-pa	Putrescine	4.737	Unclassified	C4H12N2	88.1	HMDB01414	C00134	1045	chebiId:17148	Putrescine	1045	pa
Pyruvic acid;Oxaloacetic acid@6.36-gc	Pyruvic acid;Oxaloacetic acid	6.362	Organic acids	C4H4O5;C3H4O3	110.011	HMDB00223;HMDB00243	C00036;C00022	970;1060	chebiId:30744;chebiId:32816	Oxaloacetic acid;Pyruvic acid	970;1060	gc
Raffinose@31.39-gc	Raffinose	31.387	Carbohydrates	C18H32O16	504.169	HMDB03213	C00492	10542;219993;439242	chebiId:16634	Raffinose	219993	gc
Ribitol@15.04-gc	Ribitol	15.038	Carbohydrates	C5H12O5	152.068	HMDB00508	C00474	827	chebiId:15963	Ribitol	827	gc
Ribose-5-phosphate;Ribulose-5-phosphate@1.05-qpneg	Ribose-5-phosphate;Ribulose-5-phosphate	1.049	Carbohydrates	C5H11O8P	230.019	HMDB01548;HMDB00618	C00117;C00199;C01101	439167;439184;439399	chebiId:17797;chebiId:52742;chebiId:17363;chebiId:17666	Ribose-5-phosphate;Ribulose-5-phosphate	439167;439184	qpneg
Ribose;Ribulose@14.51-gc	Ribose;Ribulose	14.511	Carbohydrates	C5H10O5	150.053	HMDB00283;HMDB00621;HMDB03371	C00121;C00309;C00508	5779;993;79021;439204;439203	chebiId:47013;chebiId:17173;chebiId:16880	Ribose;Ribulose	993;79021	gc
S-adenosylmethionine@1.35-qppos	S-adenosylmethionine	1.351	Nucleosides	C15H22N6O5S	398.137	HMDB01185	C00019	34756;34755;5136	chebiId:15414;chebiId:67040	S-adenosylmethionine	5136	qppos
S-lactoylglutathione@2.66-qppos	S-lactoylglutathione	2.662	Peptides	C13H21N3O8S	379.105	HMDB01066	C03451	1083;440018	chebiId:15694	S-lactoylglutathione	1083	qppos
Sebacic acid@17.07-gc	Sebacic acid	17.073	Fatty Acyls	C10H18O4	202.121	HMDB00792	C08277	5192	chebiId:41865	Sebacic acid	5192	gc
Serine@10.52-gc	Serine	10.516	Amino acids	C3H7NO3	105.043	HMDB00187;HMDB03406	C00065;C00740	5951;617;6857552;71077	chebiId:17115	Serine	617	gc
Spermidine@6.69-pa	Spermidine	6.693	Unclassified	C7H19N3	145.158	HMDB01257	C00315	1102	chebiId:16610	Spermidine	1102	pa
Spermine@7.48-pa	Spermine	7.478	Unclassified	C10H26N4	202.216	HMDB01256	C00750	1103	chebiId:15746	Spermine	1103	pa
Sphingosine-1-phosphate@14.97-qpneg	Sphingosine-1-phosphate	14.974	Lipids	C18H38NO5P	379.249	HMDB00277	C06124	5283560;5353956	chebiId:37550	Sphingosine-1-phosphate	5353956	qpneg
Stearic acid@22.46-qpneg	Stearic acid	22.461	Fatty Acyls	C18H36O2	284.272	HMDB00827	C01530	5281	chebiId:25629;chebiId:28842	Stearic acid	5281	qpneg
Stearidonic acid@18.89-qpneg	Stearidonic acid	18.893	Fatty Acyls	C18H28O2	276.209	HMDB06547	C16300	5312508	chebiId:32389	Stearidonic acid	5312508	qpneg
Succinic acid@9.82-gc	Succinic acid	9.825	Organic acids	C4H6O4	118.027	HMDB00254	C00042	1110;21952380	chebiId:15741	Succinic acid	1110	gc
Succinyladenosine@5.70-qppos	Succinyladenosine	5.702	Nucleosides	C14H17N5O8	383.108	HMDB00912	-	20849086	-	Succinyladenosine	20849086	qppos
Sucrose@27.03-gc	Sucrose	27.032	Carbohydrates	C12H22O11	342.116	HMDB00258	C00089	5988;1115	chebiId:17992	Sucrose	1115	gc
Tauro-alpha-muricholic acid;Tauro-beta-muricholic acid;Tauro-omega-muricholic acid@2.38-ba	Tauro-alpha-muricholic acid;Tauro-beta-muricholic acid;Tauro-omega-muricholic acid	2.375	Steroids	C26H45NO7S	515.292	HMDB00932	-	101657566;168408	chebiId:133057	TAURO Î±-MURICHOLIC ACID SODIUM SALT;Tauro-beta-muricholic acid	101657566;168408	ba
Taurochenodeoxycholic acid@7.01-ba	Taurochenodeoxycholic acid	7.012	Steroids	C26H45NO6S	499.297	HMDB00951	C05465	387316	chebiId:16525;chebiId:9407	Taurochenodeoxycholic acid	387316	ba
Taurocholic acid@4.51-ba	Taurocholic acid	4.514	Steroids	C26H45NO7S	515.292	HMDB00036	C05122	440567;5247;46783527	chebiId:28865	Taurocholic acid	5247	ba
Taurodeoxycholic acid@8.12-ba	Taurodeoxycholic acid	8.121	Steroids	C26H45NO6S	499.297	HMDB00896	C05463	2733768;440687;92042745	chebiId:36261;chebiId:9410	Taurodeoxycholic acid	2733768	ba
Taurohyodeoxycholic acid@4.22-ba	Taurohyodeoxycholic acid	4.216	Steroids	C26H45NO6S	499.297	-	-	119046	-	Taurohyodeoxycholic acid	119046	ba
Taurolithocholic acid@9.74-ba	Taurolithocholic acid	9.736	Steroids	C26H45NO5S	483.302	HMDB00722	C02592	439763;53477716	chebiId:36259	Taurolithocholic acid	439763	ba
Tauroursodeoxycholic acid@4.05-ba	Tauroursodeoxycholic acid	4.055	Steroids	C26H45NO6S	499.297	HMDB00874	-	12443252	-	Tauroursodeoxycholic acid	12443252	ba
Tetracosenoic acid@25.21-qpneg	Tetracosenoic acid	25.208	Fatty Acyls	C24H46O2	366.35	HMDB02368	C08323	5281120	chebiId:44247	Tetracosenoic acid	5281120	qpneg
Tetradecadienoic acid@17.58-qpneg	Tetradecadienoic acid	17.58	Fatty Acyls	C14H24O2	224.178	HMDB00560	-	5312409	-	Tetradecadienoic acid	5312409	qpneg
Tetradecanedioic acid@14.99-qpneg	Tetradecanedioic acid	14.988	Fatty Acyls	C14H26O4	258.183	HMDB00872	-	13185	-	Tetradecanedioic acid	13185	qpneg
Threonic acid@12.91-gc	Threonic acid	12.908	Carbohydrates	C4H8O5	136.037	HMDB00943	C01620	151152;439535;5460407	chebiId:15908;chebiId:49060	Threonic acid	439535	gc
Threonine@10.88-gc	Threonine	10.876	Amino acids	C4H9NO3	119.058	HMDB00167	C00188	6288;205;15341575	chebiId:16857	Threonine	15341575	gc
Tryptophan@3.06-qppos	Tryptophan	3.061	Indoles	C11H12N2O2	204.09	HMDB00929;HMDB30396	C00078;C00806	6305;1148;9060;4099458	chebiId:16828;chebiId:27897	Tryptophan	1148	qppos
Tyrosine@17.28-gc	Tyrosine	17.278	Amino acids	C9H11NO3	181.074	HMDB00158	C00082	6057;1153;4300518	chebiId:17895	Tyrosine	1153	gc
UMP@1.38-qpneg	UMP	1.378	Nucleotides	C9H13N2O9P	324.036	HMDB00288	C00105	6030;1172	chebiId:16695	UMP	1172	qpneg
Uracil@10.20-gc	Uracil	10.203	Bases	C4H4N2O2	112.027	HMDB00300	C00106	1174	chebiId:17568	Uracil	1174	gc
Urea@8.91-gc	Urea	8.911	Organic acids	CH4N2O	60.032	HMDB00294	C00086	1176	chebiId:16199	Urea	1176	gc
Uric acid@20.03-gc	Uric acid	20.027	Bases	C5H4N4O3	168.028	HMDB00289	C00366	1175	chebiId:17775	Uric acid	1175	gc
Uridine@1.70-qpneg	Uridine	1.696	Nucleosides	C9H12N2O6	244.07	HMDB00296	C00299	6029;1177	chebiId:16704	Uridine	1177	qpneg
Ursodeoxycholic acid@8.93-ba	Ursodeoxycholic acid	8.925	Steroids	C24H40O4	392.293	HMDB00946	C07880	31401	chebiId:9907	Ursodeoxycholic acid	31401	ba
Valine@8.56-gc	Valine	8.558	Amino acids	C5H11NO2	117.079	HMDB00883	C00183	6287;1182;5237032	chebiId:16414	Valine	1182	gc
Xanthine@18.56-gc	Xanthine	18.564	Bases	C5H4N4O2	152.033	HMDB00292	C00385	1188	chebiId:17712;chebiId:48517	Xanthine	1188	gc
Xanthosine@27.14-gc	Xanthosine	27.138	Nucleosides	C10H12N4O6	284.076	HMDB00299	C01762	64959	chebiId:18107	Xanthosine	64959	gc
Xylitol@14.85-gc	Xylitol	14.85	Carbohydrates	C5H12O5	152.068	HMDB02917	C00379	6912	chebiId:17151	Xylitol	6912	gc
Xylose@14.27-gc	Xylose	14.274	Carbohydrates	C5H10O5	150.053	HMDB00098	C00181	135191;6027	chebiId:15936;chebiId:53455	Xylose	135191	gc

## Sheet: Area
Sid	2-hydroxybutyric acid@2.50-sf	2-hydroxyglutaric acid@13.18-gc	2-oxoglutaric acid@13.19-gc	2-oxovaleric acid@14.57-sf	3-hydroxybutyric acid@1.67-sf	3-methylhistidine@0.98-qppos	4-hydroxymandelic acid@15.39-gc	4-hydroxyproline@12.61-gc	5-oxoproline@12.54-gc	Acetic acid@1.79-sf	Acetylcarnitine@1.23-qppos	Acetylcholine@1.06-qppos	Adenine@16.39-gc	Alanine@7.03-gc	Allantoin@1.09-qpneg	Alpha-muricholic acid@6.01-ba	Alpha-tocopherol@29.55-gc	Anthranilic acid@13.61-gc	Arabinose@14.34-gc	Arabitol@14.98-gc	Arachidic acid@23.87-qpneg	Arachidonic acid@20.31-qpneg	Arginine@0.98-qppos	Asparagine@14.30-gc	Aspartic acid@12.54-gc	Behenic acid@25.17-qpneg	Benzoic acid@8.94-gc	Beta-alanine@11.33-gc	Beta-muricholic acid@6.30-ba	Cadaverine@4.75-pa	Capric acid@11.63-gc	Caprylic acid@9.12-gc	Carnitine@1.00-qppos	Carnitine C10:0@12.24-qppos	Carnitine C10:1@11.45-qppos	Carnitine C12:0@14.00-qppos	Carnitine C12:1@10.61-qppos	Carnitine C14:0(OH)@13.73-qppos	Carnitine C14:1@14.74-qppos	Carnitine C14:2@13.95-qppos	Carnitine C16:0@17.32-qppos	Carnitine C16:0(OH)@15.28-qppos	Carnitine C16:1@16.19-qppos	Carnitine C18:0@19.08-qppos	Carnitine C18:1@17.76-qppos	Carnitine C18:2@16.80-qppos	Carnitine C3:0@1.58-qppos	Carnitine C4:0@2.62-qppos	Carnitine C4:0(OH)@1.42-qppos
BlM_pre	63	10	39	14525	514	10917.156	41	9	10164	12928	8122.556	NA	157	1220	52434.945	1023	208	2295	63	7	1383576.378	304170.53	985990.174	31	58	109461.57	537649	36	1118	153524	4395	620	118955.598	NA	NA	NA	6059598.119	NA	NA	NA	NA	NA	NA	NA	NA	NA	NA	NA	NA
BlM_post	82	221	570	193	637	43198.063	14	263	7567	14229	98394.523	NA	3328	11839	65678.942	905	120	25484	106	204	1024112.952	764711.212	946040.111	46	346	106086.614	150033	76	919	209581	15108	413	834240.512	10204.922	NA	NA	4293959.726	NA	NA	NA	NA	NA	NA	NA	NA	NA	3591.687	9971.152	NA
QC_liver_6a	43090	NA	NA	3991	42068	13210026.269	NA	NA	NA	94531	196288541.982	20973362.837	NA	NA	18621102.053	NA	NA	NA	NA	NA	1069867.385	43603852.835	5031511.987	NA	NA	93929.423	NA	NA	NA	264194	NA	NA	826229946.884	403767.256	106367.348	223808.44	5618171.245	304397.097	460109.404	74216.405	2105751.606	425671.367	1057669.173	1383857.161	2850472.193	1309049.444	54223879.575	27531280.67	23740342.85
QC_liver_8a	NA	8390634	275688	NA	NA	NA	1164343	6088110	364689630	NA	NA	NA	2732622	486841158	NA	NA	5729	7999	746026	331548	NA	NA	NA	437940	40902944	NA	20293689	122199935	NA	NA	999843	1958982	NA	NA	NA	NA	NA	NA	NA	NA	NA	NA	NA	NA	NA	NA	NA	NA	NA
QC_liver_7a	NA	NA	NA	NA	NA	NA	NA	NA	NA	NA	NA	NA	NA	NA	NA	31450	NA	NA	NA	NA	NA	NA	NA	NA	NA	NA	NA	NA	216846	NA	NA	NA	NA	NA	NA	NA	NA	NA	NA	NA	NA	NA	NA	NA	NA	NA	NA	NA	NA
QC_liver_6b	43907	NA	NA	1392	42251	12199708.941	NA	NA	NA	94819	194926129.983	18861480.986	NA	NA	18482409.644	NA	NA	NA	NA	NA	1114373.419	42674567.234	4462077.615	NA	NA	104598.112	NA	NA	NA	447515	NA	NA	747929538.371	362638.991	124870.664	178547.427	4065998.273	292299.092	464779.041	67498.872	1974508.543	380208.97	957975.478	1341148.364	2833006.405	1195634.092	53968562.864	26445923.19	17658453.022
QC_liver_8b	NA	10706366	356517	NA	NA	NA	2107464	7758260	346538283	NA	NA	NA	3065116	401386439	NA	NA	6754	9519	806866	338054	NA	NA	NA	813597	45383541	NA	17676594	94379482	NA	NA	1093895	1790607	NA	NA	NA	NA	NA	NA	NA	NA	NA	NA	NA	NA	NA	NA	NA	NA	NA
QC_liver_7b	NA	NA	NA	NA	NA	NA	NA	NA	NA	NA	NA	NA	NA	NA	NA	33692	NA	NA	NA	NA	NA	NA	NA	NA	NA	NA	NA	NA	218219	NA	NA	NA	NA	NA	NA	NA	NA	NA	NA	NA	NA	NA	NA	NA	NA	NA	NA	NA	NA
QC_liver_6c	43006	NA	NA	702	40837	11495069.212	NA	NA	NA	92388	183620974.516	18284331.629	NA	NA	18554294.02	NA	NA	NA	NA	NA	1002837.783	35577705.034	4454587.387	NA	NA	129343.102	NA	NA	NA	444625	NA	NA	693035892.684	318989.335	107944.507	201458.964	3886798.198	233691.018	377165.391	63365.972	1791580.368	379181.118	912284.639	1190572.002	2529241.194	962614.468	48447084.68	24424714.915	18612851.073
QC_liver_8c	NA	11292996	381621	NA	NA	NA	2048571	6954799	355917290	NA	NA	NA	3003783	613218182	NA	NA	5690	11280	1038848	309014	NA	NA	NA	354452	41434525	NA	15642927	104174950	NA	NA	1218392	1677385	NA	NA	NA	NA	NA	NA	NA	NA	NA	NA	NA	NA	NA	NA	NA	NA	NA
QC_liver_7c	NA	NA	NA	NA	NA	NA	NA	NA	NA	NA	NA	NA	NA	NA	NA	34886	NA	NA	NA	NA	NA	NA	NA	NA	NA	NA	NA	NA	209415	NA	NA	NA	NA	NA	NA	NA	NA	NA	NA	NA	NA	NA	NA	NA	NA	NA	NA	NA	NA
QC_liver_6d	45138	NA	NA	328	41742	12721598.505	NA	NA	NA	98218	199426222.069	19027908.889	NA	NA	19536152.807	NA	NA	NA	NA	NA	1081742.504	27747114.062	5220893.715	NA	NA	119972.869	NA	NA	NA	398814	NA	NA	729462913.016	346308.308	62442.733	179517.85	3605743.34	247667.564	420323.413	39967.063	1869399.281	421011.492	895616.021	1286133.973	2584475.089	996043.877	53591273.414	26683663.727	18485127.31
QC_liver_9a	NA	8886938	297812	NA	NA	NA	1859454	3080131	411229835	NA	NA	NA	2521151	127723908	NA	NA	7100	6881	1159560	271234	NA	NA	NA	486737	31043387	NA	14964953	46895403	NA	NA	797890	1365894	NA	NA	NA	NA	NA	NA	NA	NA	NA	NA	NA	NA	NA	NA	NA	NA	NA
QC_liver_7d	NA	NA	NA	NA	NA	NA	NA	NA	NA	NA	NA	NA	NA	NA	NA	33646	NA	NA	NA	NA	NA	NA	NA	NA	NA	NA	NA	NA	211028	NA	NA	NA	NA	NA	NA	NA	NA	NA	NA	NA	NA	NA	NA	NA	NA	NA	NA	NA	NA
QC_liver_6e	45816	NA	NA	172	42507	12253198.018	NA	NA	NA	95943	186672082.609	19331267.477	NA	NA	19093445.655	NA	NA	NA	NA	NA	1026103.055	27960891.251	4560467.807	NA	NA	92421.785	NA	NA	NA	392438	NA	NA	741629375.106	344739.824	76587.608	202404.294	3776206.531	263777.679	417748.672	48098.736	1772505.235	388290.653	887729.451	1305727.264	2615477.786	956833.235	58533774.249	25877402.946	20396855.883
QC_liver_9b	NA	10387274	333347	NA	NA	NA	2107492	4013629	441854637	NA	NA	NA	2909135	130946273	NA	NA	6058	10148	1069782	309973	NA	NA	NA	508141	33264190	NA	15923166	56508283	NA	NA	952860	1126906	NA	NA	NA	NA	NA	NA	NA	NA	NA	NA	NA	NA	NA	NA	NA	NA	NA
QC_liver_7e	NA	NA	NA	NA	NA	NA	NA	NA	NA	NA	NA	NA	NA	NA	NA	34859	NA	NA	NA	NA	NA	NA	NA	NA	NA	NA	NA	NA	211481	NA	NA	NA	NA	NA	NA	NA	NA	NA	NA	NA	NA	NA	NA	NA	NA	NA	NA	NA	NA
QC_liver_8d	NA	11057219	346610	NA	NA	NA	2190234	8836991	361895981	NA	NA	NA	3361899	449459958	NA	NA	7271	14845	982584	371024	NA	NA	NA	749312	50664834	NA	20245651	123442950	NA	NA	904644	1707281	NA	NA	NA	NA	NA	NA	NA	NA	NA	NA	NA	NA	NA	NA	NA	NA	NA
QC_liver_6f	NA	NA	NA	NA	NA	14021560.551	NA	NA	NA	NA	193963686.32	19081547.777	NA	NA	17896245.485	NA	NA	NA	NA	NA	887426.906	29667961.942	5473049.839	NA	NA	113517.665	NA	NA	NA	NA	NA	NA	796876915.41	391857.13	103095.323	175968.776	3881836.949	244761.661	405844.946	40963.656	1703477.749	447171.955	877464.375	1172877.8	2635108.996	1064125.328	51301181.339	24933299.685	19334685.378
liver-666-FMT_31	38452	13140595	222333	3088	36118	15043101.057	3757270	3961568	398007328	40347	777524092.309	30041357.128	3978973	557879065	18312276.116	39569	7534	12561	698972	210761	906796.828	19586560.785	5163218.023	429504	28482031	122538.153	14594851	57591494	43102	266578	819582	1492748	773238028.455	857041.755	264780.73	320223.206	5672830.833	124983.247	747638.167	124930.103	4179179.926	259349.567	1090624.282	2186847.884	2934659.399	1286767.14	155936703.241	101513403.413	30570648.068
liver-667-FMT-AKK-Pas_32	57040	16499667	233248	2808	28394	21574559.304	959707	17484859	360977288	92229	202651584.471	30539920.46	2899361	492001163	20850977.557	15761	6219	10897	690605	370384	905915.015	39565888.085	7698373.273	946985	48881988	110556.991	13451737	174704881	64371	319713	872529	1537843	1073799656.378	519899.893	114101.764	251580.38	5541580.451	620690.769	610645.239	56051.599	2596246.772	1470545.546	1887583.118	1349703.815	5662988.6	2144656.497	67585368.994	39302407.875	25322917.549
liver-684-SPF_49	44318	11463853	308746	2615	62054	12828595.903	954997	12548920	363056878	109875	46609829.891	24862792.818	3750540	764734756	15193009.875	73467	7148	22493	657443	306273	969943.69	88019865.021	5570292.715	996671	68528742	130962.491	15082684	155304268	141282	192400	1281029	1685677	953858576.519	527415.104	49140.077	406534.577	4854030.87	1242448.059	843838.087	152825.823	2249631.938	2086237.615	1312355.33	1448525.953	3142021.488	2572653.134	28653893.755	14215107.678	29289423.363
liver-668-FMT-AKK_33	24801	8201916	555860	2176	43353	7994456.166	299885	7134306	355193017	70101	64237904.31	13784659.069	3263804	504822653	19255798.634	32513	4571	11315	911941	275035	932129.009	38902971.143	1793683.575	404334	55504830	118119.148	17381008	141284504	54733	290189	1034384	1566132	412607036.968	157961.401	87232.515	81833.165	5973393.511	124804.224	217313.099	24726.056	1787654.086	202441.899	835653.063	883241.85	2625848.591	939608.639	16891258.131	6649037.432	9782641.21
liver-690-ATB_55	28887	6449853	296595	2202	23302	7951319.295	196017	5276189	273592295	56577	136239368.97	13035198.287	1868116	493778637	17326409.016	6136	4452	4600	441070	169257	5182164.586	34204417.998	2556077.067	499159	28158828	443055.869	16229614	137651047	110639	144720	1048572	1497743	802963140.852	226518.815	83120.232	140964.337	5221983.13	224821.079	377800.532	29791.708	1106174.274	281868.721	649849.766	660575.603	1594782.9	884604.451	45766766.424	11071105.219	12417113.71
liver-681-FMT-AKK-Pas_46	46344	18038003	377894	1615	21056	14409688.55	186287	15219394	316846118	71085	123838520.548	24728300.797	2611198	705278053	17351690.518	17262	5977	19701	1080636	351651	1479403.436	50871511.874	2518949.078	589037	51996677	152952.958	15805231	193588495	53977	372878	1160189	2156374	800101044.344	281306.388	138527.169	191819.733	3878270.259	284590.131	397339.902	32905.627	1598054.432	380653.532	1196607.132	1058139.182	3229836.297	1311771.148	55088960.765	21527409.659	11613628.99
liver-670-FMT_35	34033	11571435	399587	1524	25509	16691157.594	2777258	6185857	436238163	85054	471247456.371	17549006.772	2886198	109895496	18847614.645	16402	4434	7350	719277	240226	1034969.129	30245839.399	2243285.589	529413	29584476	141291.408	15083096	62298651	68507	465838	1184040	1899221	717830137.848	330706.348	147094.593	134522.514	3774392.979	168645.528	261285.54	14714.157	1242509.13	228497.518	760579.835	869493.326	2267574.078	827265.843	49825980.173	62517756.702	20629173.932
liver-685-SPF_50	59255	12239742	453271	1113	39790	17065158.747	1816479	7092235	389226679	123228	245746937.429	25680438.124	2771837	181285210	28481042.634	56370	6602	13017	1741855	361672	1212061.333	47511146.133	3833781.204	584060	55916500	120651.528	19661384	44760571	68669	337617	958238	1527369	1039788635.636	568401.7	234437.491	320113.53	3869413.035	426045.883	766305.89	97658.525	3352336.494	499172.873	1898879.623	1745307.468	4685265.526	1538314.392	75321657.735	43962647.412	21227111.974
liver-675-FMT-AKK_40	52169	9348734	272143	1165	45871	12704988.806	2967653	6433642	409069773	85073	290383938.907	20631891.128	2822029	218106307	20165001.513	19957	6843	10999	802658	338059	1030385.379	27591593.745	3868535.963	498626	57080518	119990.439	17747591	59993015	46594	434103	1093637	1500685	763385206.619	347586.367	82220.268	140457.436	3953741.235	128178.006	325222.412	15899.96	2620200.136	317679.053	714444.545	1392621.886	2071201.657	533669.023	59324032.592	29633569.927	21578458.025
liver-692-ATB_57	48082	7590385	289017	956	22344	10020306.155	1644358	8287355	244307670	52713	164969500.861	18167957.238	2100691	329343401	24924746.796	13808	6731	2720	575649	240234	1123342.292	18610721.907	1881429.386	541219	50665284	99805.613	17510689	118951554	153644	267767	755703	1504730	671289763.035	266904.939	144963.799	106097.254	3925775.425	50937.133	239328.207	44293.395	1060535.572	92747.26	450127.955	958390.596	1755380.705	600402.404	69889743.922	24026862.128	9320552.489
liver-683-FMT_48	29742	9042319	395185	858	38966	10155364.425	133078	8830582	319185737	102587	51267744.814	13403457.159	2695785	580224680	23557235.931	29750	6061	12410	749669	285056	1188867.379	31249736.534	2010270.552	928896	38763882	124326.155	15465892	143770353	63825	360089	921061	1527001	430431007.953	145371.615	56081.938	69258.2	3525620.032	189086.942	153371.996	3285.853	660420.107	179873.555	357486.03	542029.073	1130735.928	426740.307	33453073.752	7596031.837	10422277.362
liver-689-SPF_54	22946	5680204	491707	758	94143	8219106.167	1998120	3711359	373279682	93692	29080683.713	14414358.332	4431692	596364578	18261432.743	126269	7002	13288	771934	243915	1201217.65	45281907.128	2051754.368	561007	53702155	117418.149	14192516	99398211	344082	291269	1189016	1456609	455845342.521	331618.985	72447.37	190803.632	3571514.636	142968.672	476556.884	101533.663	1812335.088	242509.108	1189257.455	1072168.351	3424639.417	1538447.723	18927440.638	4974483.082	18043370.916
liver-680-FMT-AKK_45	41078	11002464	292125	640	60027	10225818.237	1878711	5543262	363467892	124003	115371509.372	12678437.767	3463424	128215454	21573806.553	41842	7633	8653	1180971	320884	1322819.62	45368574.585	1845785.09	589722	36073124	136913.027	18153483	81202317	51538	333008	987371	2629851	560844246.309	266927.63	59297.542	109486.213	3377839.457	137968.803	270101.954	41809.155	2010641.344	333783.635	588228.229	1212898.616	2023180.426	997958.528	39967346.596	18785093.912	18258353.575
liver-686-ATB_51	36262	5193503	328685	659	40601	10540486.849	654847	6309623	238431351	45780	152700841.395	16983213.934	1829483	543740773	14966269.713	13633	3891	3163	425599	257349	907855.351	18389107.389	2129200.569	391093	41257120	109013.81	14282170	143941462	239109	265646	1016220	1448281	610471129.633	296298.216	124560.162	134387.112	3667051.24	139744.638	318899.231	59392.84	2114914.355	190317.326	625500.242	1728208.072	1988740.277	880541.767	62603087.327	12533509.102	16731264.693
liver-676-FMT-AKK-Pas_41	48004	23278248	347178	488	27819	15667858.7	1887015	13553634	342362398	85502	339258998.593	23162311.811	4530587	807482996	19123884.225	26137	6716	13874	1404108	422680	1135601.437	32927277.954	4209650.041	765715	39060909	110265.897	16135847	134688810	110416	804827	1045984	1839960	817103377.27	365886.538	123099.789	148797.767	3873429.352	269685.564	297448.397	35202.724	1260671.744	294360.62	1087926.694	1012384.335	2935163.045	1160076.996	71003407.565	39895473.317	17514398.727
liver-682-FMT_47	30507	9612688	318505	496	31062	13424936.253	2199026	3978359	350192941	105765	164514048.744	18453557.314	4181744	465495837	20628091.007	45230	5437	13271	595637	261838	1195705.396	40945986.297	2206471.134	942899	27174405	155126.237	16026331	79938187	58287	728305	978394	1367255	712479903.731	221479.849	102797.541	118158.604	3731619.21	148834.693	252030.797	13571.085	1847563.366	234847.197	720594.017	1248495.596	2303684.26	919410.464	35598456.464	20623217.466	18796994.628
liver-688-ATB_53	60107	6788522	265329	450	37068	10770980.606	1836564	2930769	300044095	125054	107120291.998	17513009.646	2340160	430278679	20824203.441	63163	9216	7390	657879	338251	1061171.772	44107512.265	2280553.944	543418	30601290	113932.902	16986966	107638917	273314	465225	749478	1326403	966763970.082	237534.55	106047.788	118305.565	3685007.625	193089.536	269252.765	23852.539	1015676.075	281853.236	754833.726	876463.815	2471222.494	1419784.753	55214926.024	16925174.735	20854196.303
liver-687-SPF_52	49428	6560504	551318	407	76085	15823763.145	1847098	4256258	367910331	110017	55874039.088	19114408.126	2736796	473635765	21525585.951	64842	7539	4272	763415	313310	995492.972	60524027.425	2548250.485	745852	77529489	104507.626	17143462	98337300	131252	580826	879709	1460054	920238918.239	780918.004	365463.932	636686.668	3956873.317	1207658.201	1570424.673	342943.233	2837835.266	1985508.035	2813256.559	1538860.485	5844273.055	2799431.101	46016592.086	13494758.187	19626928.129
liver-679-FMT-AKK_44	45993	12801347	161483	419	51381	9740416.122	2767804	2868556	442201376	50496	141425620.711	15780430.245	3250005	320712922	13952858.538	19533	7012	5300	1245876	290468	958363.667	58548566.744	3617970.77	660571	29495169	127554.061	13880859	28602125	61797	719068	1176781	1278948	673750174.676	218343.172	14190.314	106143.655	4007705.803	13123.997	257789.166	77689.568	1662557.247	78692.94	288946.312	1539924.49	1224251.977	754514.334	40423527.818	12735783.882	16434282.862
liver-673-FMT-AKK-Pas_38	44207	9646995	199233	396	54515	14395152.039	2695746	8323868	355352633	90176	286059218.338	21420235.871	3916706	453658615	22780625.434	63280	6169	6653	1084672	356276	1154160.914	43422652.297	5635231.561	917129	51971965	106243.525	18003251	116447802	63118	836070	824047	1648987	682348782.974	327666.226	93349.395	195635.268	3541328.77	139223.1	360769.309	30821.096	3560565.762	274460.989	654339.871	1972231.777	2139990.532	691462.173	55935835.2	36896328.217	25032403.059
liver-691-ATB_56	40287	8383074	290518	386	39821	11272776.962	1837874	9229378	242029143	79225	89286739.713	17498092.291	2887357	606132823	18417402.282	53620	8152	4259	573591	340039	1235697.483	40884936.815	3896385.373	1215895	50938013	156295.358	15131396	154517299	1821651	531602	1238741	1546720	1113700350.136	492423.816	214383.422	338345.439	3747478.249	347683.518	904329.319	155342.665	2070442.446	485541.582	1717363.382	1376735.365	4895986.445	2750884.392	77980940.557	14525929.585	31525303.658
liver-678-FMT_43	35519	8400144	287258	263	22955	12184749.725	1059176	9343637	242568604	67937	139805019.528	16707164.74	3252047	580824651	22283783.064	101727	4752	27343	641967	234157	994748.219	30538376.796	4759667.399	1794371	48650469	67506.803	16532936	198585692	1000444	353786	1186943	1598485	686974609.243	297232.01	134562.838	171170.036	3684324.846	314681.05	345539.588	11963.905	1105101.23	399301.98	879650.152	777242.08	2690287.262	1097778.162	53243398.477	18259426.745	15778954.929
liver-693-SPF_58	43927	4479135	161174	300	53405	12223190.03	1739327	4233632	370610403	77904	106170918.824	15778337.939	3489257	664930163	12161520.178	22757	4095	12125	1045451	244961	1116869.825	63081474.002	4798180.303	958166	44483338	116465.372	11507575	65867949	27093	970372	958589	1143103	778424514.922	256104.32	36560.882	165030.946	3692511.823	68769.581	394983.979	41419.596	1321465.787	126694.801	622711.074	927464.611	1984183.789	1242062.351	26164753.854	12393689.159	22065711.616
liver-672-FMT-AKK_37	43250	10029584	291813	174	39743	11311118.509	1166549	12491368	303561855	74657	90592947.267	21806298.899	2530283	675039746	16768000.85	34660	6658	10294	960213	394207	1010792.047	41353535.917	4007250.701	1652075	55219883	107033.939	18182852	169770329	116470	399478	1171114	1665012	741817058.218	203903.689	20285.408	124421.499	3811343.117	143917.293	229926.493	24964.844	1395540.487	200463.978	615540.094	974989.93	1494686.642	555964.119	34673906.168	10123843.485	15339225.028
liver-671-FMT-AKK-Pas_36	51891	12186447	346581	299	50104	12468732.498	2054766	6574584	394573495	115404	205157661.019	29114577.627	5188305	329755345	19123840.487	17074	7965	18761	1772052	424331	1061456.116	33157695.116	4692336.577	747979	40881825	97187.748	19964789	86573662	43705	406350	1110241	1823981	1053163961.01	548257.676	267123.977	314651.419	3912097.959	522545.308	563336.023	72846.085	2044476.037	492877.519	1512654.951	1545416.597	3739411.428	1499657.06	95354163.292	28373122.382	32926918.969
liver-694-ATB_59	35104	6747160	293336	250	33712	7004043.64	1669578	6534383	196886211	76913	48114391.71	13389221.845	2109225	634872275	16440550.091	35778	5636	2929	503969	221004	1110093.188	40253140.286	2552477.719	2416222	42416213	91441.959	16556835	154125332	1158926	286850	1148980	1627434	675065682.885	230438.279	29829.652	103466.064	3938898.177	32495.753	160353.985	3485	737649.869	94691.081	425358.849	494963.874	1144335.702	542159.207	27168968.911	6748219.559	17306342.112
liver-669-FMT_34	34664	12485789	414477	160	38881	17412664.337	1731072	10732636	350523912	80870	245786517.716	21752692.683	3635641	587366774	22764790.591	48312	5295	25188	885159	295194	946111.126	28787372.651	3425649.405	727635	44095547	94888.674	19675585	201831855	229570	365188	1164476	1789893	837258512.786	412585.677	223745.605	198249.275	3924556.402	404312.959	535376.788	73395.108	1793579.965	413825.415	1144269.11	1089884.337	2885711.972	1244132.22	75020672.686	23814178.106	19168449.815
liver-695-SPF_60	36816	11164312	240224	281	29678	11503100.984	2095283	11816570	266463191	35957	494752307.372	20242281.513	3236929	684525172	12907447.745	47045	5279	22702	914468	236041	881123.871	14757260.028	3874124.255	850923	40957527	81515.583	18169943	150140350	34889	326109	1226338	1722227	646909116.38	608983.6	184824.871	286443.356	3974387.973	90725.727	617261.063	57120.773	4000032.066	233879.181	980525.975	2730639.519	2944037.692	902323.954	73463520.099	115459083.601	15766121.05
liver-674-FMT-AKK_39	55228	12929067	621647	220	33742	16077077.93	2170731	16951122	333399100	70195	108321397.207	22478806.141	3030852	769300691	20695080.239	25397	6642	15807	1152628	405034	1134339.401	36510213.26	4132400.694	537942	54869987	95055.766	20455130	156096849	84935	428853	1428494	1860995	834694845.271	320060.838	121563.642	127367.637	3799670.9	300811.002	322588.06	18576.262	1621187.418	371318.643	1060314.119	1151180.766	2614574.582	881091.468	52575211.895	17586666.087	13619004.529
St_mix_pre	258046	NA	NA	15565	156251	NA	NA	NA	NA	79095	NA	NA	NA	NA	NA	NA	NA	NA	NA	NA	NA	NA	NA	NA	NA	NA	NA	NA	NA	5582	NA	NA	NA	NA	NA	NA	NA	NA	NA	NA	NA	NA	NA	NA	NA	NA	NA	NA	NA
St_BA1_pre	NA	NA	NA	NA	NA	NA	NA	NA	NA	NA	NA	NA	NA	NA	NA	24807	NA	NA	NA	NA	NA	NA	NA	NA	NA	NA	NA	NA	42645	NA	NA	NA	NA	NA	NA	NA	NA	NA	NA	NA	NA	NA	NA	NA	NA	NA	NA	NA	NA
St_BA2_pre	NA	NA	NA	NA	NA	NA	NA	NA	NA	NA	NA	NA	NA	NA	NA	19466	NA	NA	NA	NA	NA	NA	NA	NA	NA	NA	NA	NA	1625899	NA	NA	NA	NA	NA	NA	NA	NA	NA	NA	NA	NA	NA	NA	NA	NA	NA	NA	NA	NA
St_AA_post	NA	29236	285665	NA	NA	334895089.613	1259	17100680	3694657	NA	NA	676083.869	80763	21675180	NA	NA	328	2318	24853	11863	588588.527	241273.072	162138802.742	659	4030978	39118.541	3753695	151415759	NA	NA	968387	1598803	NA	NA	NA	NA	5709023.663	NA	NA	NA	19671.629	NA	NA	NA	NA	NA	7708.557	NA	NA
St_AA_pre	NA	61907	44610	NA	NA	328871189.171	390	17953857	2471998	NA	NA	869942.664	1117	6854079	21620.814	NA	325	11172	20799	23909	584649.675	499026.254	159692850.409	67	2787829	77056.342	28786616	132443151	NA	NA	5644372	4270465	73730.587	3026.901	NA	NA	4253246.862	NA	NA	NA	8158.258	NA	NA	NA	NA	NA	NA	NA	NA
St_mix_post	NA	NA	NA	NA	NA	NA	NA	NA	NA	NA	NA	NA	NA	NA	NA	NA	NA	NA	NA	NA	NA	NA	NA	NA	NA	NA	NA	NA	NA	66489	NA	NA	NA	NA	NA	NA	NA	NA	NA	NA	NA	NA	NA	NA	NA	NA	NA	NA	NA
St_BA1_post	NA	NA	NA	NA	NA	NA	NA	NA	NA	NA	NA	NA	NA	NA	NA	57043	NA	NA	NA	NA	NA	NA	NA	NA	NA	NA	NA	NA	9101	NA	NA	NA	NA	NA	NA	NA	NA	NA	NA	NA	NA	NA	NA	NA	NA	NA	NA	NA	NA
St_BA2_post	NA	NA	NA	NA	NA	NA	NA	NA	NA	NA	NA	NA	NA	NA	NA	13119	NA	NA	NA	NA	NA	NA	NA	NA	NA	NA	NA	NA	1572331	NA	NA	NA	NA	NA	NA	NA	NA	NA	NA	NA	NA	NA	NA	NA	NA	NA	NA	NA	NA
[truncated: 176 more columns]

## Sheet: Height
Sid	2-hydroxybutyric acid@2.50-sf	2-hydroxyglutaric acid@13.18-gc	2-oxoglutaric acid@13.19-gc	2-oxovaleric acid@14.57-sf	3-hydroxybutyric acid@1.67-sf	3-methylhistidine@0.98-qppos	4-hydroxymandelic acid@15.39-gc	4-hydroxyproline@12.61-gc	5-oxoproline@12.54-gc	Acetic acid@1.79-sf	Acetylcarnitine@1.23-qppos	Acetylcholine@1.06-qppos	Adenine@16.39-gc	Alanine@7.03-gc	Allantoin@1.09-qpneg	Alpha-muricholic acid@6.01-ba	Alpha-tocopherol@29.55-gc	Anthranilic acid@13.61-gc	Arabinose@14.34-gc	Arabitol@14.98-gc	Arachidic acid@23.87-qpneg	Arachidonic acid@20.31-qpneg	Arginine@0.98-qppos	Asparagine@14.30-gc	Aspartic acid@12.54-gc	Behenic acid@25.17-qpneg	Benzoic acid@8.94-gc	Beta-alanine@11.33-gc	Beta-muricholic acid@6.30-ba	Cadaverine@4.75-pa	Capric acid@11.63-gc	Caprylic acid@9.12-gc	Carnitine@1.00-qppos	Carnitine C10:0@12.24-qppos	Carnitine C10:1@11.45-qppos	Carnitine C12:0@14.00-qppos	Carnitine C12:1@10.61-qppos	Carnitine C14:0(OH)@13.73-qppos	Carnitine C14:1@14.74-qppos	Carnitine C14:2@13.95-qppos	Carnitine C16:0@17.32-qppos	Carnitine C16:0(OH)@15.28-qppos	Carnitine C16:1@16.19-qppos	Carnitine C18:0@19.08-qppos	Carnitine C18:1@17.76-qppos	Carnitine C18:2@16.80-qppos	Carnitine C3:0@1.58-qppos	Carnitine C4:0@2.62-qppos	Carnitine C4:0(OH)@1.42-qppos
BlM_pre	11	22	139	3271	74	4195.674	47	5	6357	1566	2270.929	NA	204	827	8563.723	459	267	2199	62	8	166199.695	20970.591	191651.727	49	47	12092.611	50597	34	111	14226	2538	453	23039.371	NA	NA	NA	886577.602	NA	NA	NA	NA	NA	NA	NA	NA	NA	NA	NA	NA
BlM_post	22	155	451	48	73	11953.539	11	242	5363	1775	16484.674	NA	2231	7174	13050.143	408	408	5777	193	237	101660.206	39279.354	168204.937	61	214	19282.412	20361	132	142	29469	7034	449	136602.133	1963.589	NA	NA	649460.312	NA	NA	NA	NA	NA	NA	NA	NA	NA	1311.592	1497.173	NA
QC_liver_6a	5084	NA	NA	928	5124	2569366.545	NA	NA	NA	11412	30321228.414	4290847.678	NA	NA	3463446.411	NA	NA	NA	NA	NA	110342.686	5984325.557	1091263.922	NA	NA	9210.627	NA	NA	NA	19596	NA	NA	198496918.962	50227.631	12695.817	26898.101	939678.842	28859.828	23703.306	5947.204	139525.234	34848.065	77563.74	69103.394	183944.63	93197.583	10616381.3	3183195.873	5599201.471
QC_liver_8a	NA	5668960	186527	NA	NA	NA	733215	3203884	155411215	NA	NA	NA	1310380	165963778	NA	NA	4818	6940	433628	386225	NA	NA	NA	245964	21440776	NA	6447464	46326310	NA	NA	563260	636946	NA	NA	NA	NA	NA	NA	NA	NA	NA	NA	NA	NA	NA	NA	NA	NA	NA
QC_liver_7a	NA	NA	NA	NA	NA	NA	NA	NA	NA	NA	NA	NA	NA	NA	NA	4400	NA	NA	NA	NA	NA	NA	NA	NA	NA	NA	NA	NA	27068	NA	NA	NA	NA	NA	NA	NA	NA	NA	NA	NA	NA	NA	NA	NA	NA	NA	NA	NA	NA
QC_liver_6b	5213	NA	NA	322	4981	2297640.414	NA	NA	NA	11196	31153807.651	3710025.358	NA	NA	3498320.377	NA	NA	NA	NA	NA	113276.761	5872806.83	884698.498	NA	NA	11258.643	NA	NA	NA	31984	NA	NA	178760604.65	52641.657	13472.543	19932.53	584748.046	31519.45	26968.234	9414.042	112452.132	31349.742	69607.972	72521.417	172029.243	87085.757	10397140.671	2907592.384	3802568.243
QC_liver_8b	NA	6848387	228547	NA	NA	NA	1181821	4391451	152682237	NA	NA	NA	1568407	166123881	NA	NA	5113	9860	512860	446143	NA	NA	NA	379190	27014749	NA	11473039	53465625	NA	NA	714925	864626	NA	NA	NA	NA	NA	NA	NA	NA	NA	NA	NA	NA	NA	NA	NA	NA	NA
QC_liver_7b	NA	NA	NA	NA	NA	NA	NA	NA	NA	NA	NA	NA	NA	NA	NA	4877	NA	NA	NA	NA	NA	NA	NA	NA	NA	NA	NA	NA	28950	NA	NA	NA	NA	NA	NA	NA	NA	NA	NA	NA	NA	NA	NA	NA	NA	NA	NA	NA	NA
QC_liver_6c	5097	NA	NA	158	4930	2001173.503	NA	NA	NA	11149	28246843.209	3639785.912	NA	NA	3350650.23	NA	NA	NA	NA	NA	82970.487	4619099.267	844769.546	NA	NA	17962.623	NA	NA	NA	32085	NA	NA	153274189.06	41383.512	10444.895	22793.459	528062.631	24032.222	21369.961	8776.348	118168.261	29194.549	69713.351	65131.325	168692.729	73595.859	9126163.735	2644056.059	4113267.116
QC_liver_8c	NA	7244739	242690	NA	NA	NA	1084775	3980422	151979825	NA	NA	NA	1419588	165766750	NA	NA	3750	8846	634033	424863	NA	NA	NA	205746	25153153	NA	9699896	68521774	NA	NA	837713	992557	NA	NA	NA	NA	NA	NA	NA	NA	NA	NA	NA	NA	NA	NA	NA	NA	NA
QC_liver_7c	NA	NA	NA	NA	NA	NA	NA	NA	NA	NA	NA	NA	NA	NA	NA	4743	NA	NA	NA	NA	NA	NA	NA	NA	NA	NA	NA	NA	26718	NA	NA	NA	NA	NA	NA	NA	NA	NA	NA	NA	NA	NA	NA	NA	NA	NA	NA	NA	NA
QC_liver_6d	5477	NA	NA	72	5069	2477963.984	NA	NA	NA	11166	33492288.682	3844155.721	NA	NA	3572904.501	NA	NA	NA	NA	NA	103258.335	3661996.16	1156893.752	NA	NA	17991.627	NA	NA	NA	24673	NA	NA	164255396.877	44819.697	10863.099	20977.885	510844.113	23171.898	23776.095	4897.34	116388.196	33721.806	65938.873	70822.147	174753.573	79910.519	10287601.961	2921935.61	4463283.314
QC_liver_9a	NA	6044555	201681	NA	NA	NA	983890	1889911	164342342	NA	NA	NA	1161630	127590010	NA	NA	4442	5651	620207	322322	NA	NA	NA	228842	19138484	NA	6356916	13800294	NA	NA	529413	521611	NA	NA	NA	NA	NA	NA	NA	NA	NA	NA	NA	NA	NA	NA	NA	NA	NA
QC_liver_7d	NA	NA	NA	NA	NA	NA	NA	NA	NA	NA	NA	NA	NA	NA	NA	4754	NA	NA	NA	NA	NA	NA	NA	NA	NA	NA	NA	NA	27498	NA	NA	NA	NA	NA	NA	NA	NA	NA	NA	NA	NA	NA	NA	NA	NA	NA	NA	NA	NA
QC_liver_6e	5511	NA	NA	40	5257	2041362.243	NA	NA	NA	11153	30140447.635	3728292.759	NA	NA	3340738.763	NA	NA	NA	NA	NA	102273.12	3842781.382	826841.712	NA	NA	11609.088	NA	NA	NA	28946	NA	NA	169614487.372	42831.769	11118.599	21243.766	509553.11	26807.6	24134.025	4999.945	112243.501	27933.72	65382.611	76609.742	166109.951	65627.068	12179797.573	3006877.985	4551081.487
QC_liver_9b	NA	6959659	221191	NA	NA	NA	1127489	2492526	163776774	NA	NA	NA	1420038	119731277	NA	NA	3939	7692	647131	439809	NA	NA	NA	275462	20979973	NA	7778215	25837639	NA	NA	679518	606383	NA	NA	NA	NA	NA	NA	NA	NA	NA	NA	NA	NA	NA	NA	NA	NA	NA
QC_liver_7e	NA	NA	NA	NA	NA	NA	NA	NA	NA	NA	NA	NA	NA	NA	NA	4728	NA	NA	NA	NA	NA	NA	NA	NA	NA	NA	NA	NA	26687	NA	NA	NA	NA	NA	NA	NA	NA	NA	NA	NA	NA	NA	NA	NA	NA	NA	NA	NA	NA
QC_liver_8d	NA	7396846	236353	NA	NA	NA	1254570	5373875	155422613	NA	NA	NA	1685824	166112785	NA	NA	5370	11603	652462	458933	NA	NA	NA	415398	29245904	NA	10752392	66830601	NA	NA	615152	903779	NA	NA	NA	NA	NA	NA	NA	NA	NA	NA	NA	NA	NA	NA	NA	NA	NA
QC_liver_6f	NA	NA	NA	NA	NA	2941426.063	NA	NA	NA	NA	31614140.915	3823173.677	NA	NA	3535599.523	NA	NA	NA	NA	NA	105600.035	3871240.097	1150397.039	NA	NA	13332.27	NA	NA	NA	NA	NA	NA	179989294.991	50711.139	12951.528	18761.922	561833.684	25031.045	22286.929	5653.624	108806.035	36177.191	60798.784	64976.543	164260.516	75298.033	9986719.292	2588412.689	4491655.866
liver-666-FMT_31	4763	8963647	153342	696	4408	2780657.57	2089297	2301495	164734260	4590	121788366.867	5998489.137	1883396	162694003	3457008.698	5184	5125	11033	401672	247076	97111.475	2813571.622	972533.664	144191	17477584	18634.212	5656823	20478002	5542	23562	560110	545832	179376704.577	112247.088	26912.564	34392.481	722429.963	15543.237	38915.059	13645.715	310031.125	26543.12	88611.059	116226.098	194311.691	111888.702	32633437.519	13205875.942	6771890.516
liver-667-FMT-AKK-Pas_32	6998	10735699	151668	635	3452	4006381.501	602263	8816719	144371893	11141	31417127.202	6445950.958	1483195	166194524	3987792.149	2291	3661	8139	419109	445686	101430.894	4937926.804	1481823.816	703928	24841803	12306.841	6840515	74365922	8186	28062	455378	782222	242473102.405	69141.081	11368.066	28418.42	771062.319	72322.145	39318.537	7046.717	160935.191	107746.322	134177.615	70899.673	441382.22	137413.037	13373417.992	3774456.027	5685823.056
liver-684-SPF_49	5377	7515960	203030	619	7549	2223929.139	630631	7409258	153329325	13271	7495739.93	4861176.521	1970126	166709488	2880740.569	9837	4758	14837	396935	400773	108869.1	11394545.941	1069991.2	651877	41320647	14991.73	10312449	100203176	17721	15377	841696	1008952	223071788.73	74479.428	8412.666	40256.688	639078.303	103409.061	47518.692	10289.123	132763.32	167910.964	106295.829	80675.34	201695.208	161037.091	5555113.586	1305781.433	6189896.438
liver-668-FMT-AKK_33	3012	5291950	375635	489	5525	1329693.284	192771	4189914	142167724	8354	10841112.169	2679781.003	1616500	165749264	3419127.461	4066	3872	8393	514522	379998	91968.51	5717098.884	338208.417	300592	32993242	12650.138	11180945	92553758	6953	26544	716837	960273	94393185.378	19051.49	8132.48	10451.476	814042.861	13567.343	15991.519	4696.942	110191.009	18613.523	68328.589	49643.066	177931.056	68442.601	3536930.203	687732.845	2154297.554
liver-690-ATB_55	3385	4137521	190216	501	2784	1547289.471	131629	3104459	125190853	6776	22831954.502	2667125.33	909128	165481798	3203098.659	1367	2792	3381	264071	246986	477564.585	4703691.777	527073.584	259188	17577542	50418.978	10135178	90601323	14378	11482	701024	899740	187417642.925	29029.919	8678.205	15901.658	699780.615	25798.172	27676.095	5655.721	78143.096	28203.133	56060.753	38678.631	105694.891	75958.09	8717422.056	1301853.522	3053729.363
liver-681-FMT-AKK-Pas_46	5669	11839703	242952	383	2677	2499539.637	123175	9183657	133593934	8638	19006386.875	5470125.727	1344415	164980314	3168052.171	2526	3677	14348	607100	474491	168294.693	6631242.157	494869.686	371048	29966892	21321.923	10430766	122696183	6812	24411	796012	1326798	176605504.703	36317.116	14141.137	21328.532	534052.217	28947.769	25234.046	6577.451	99238.829	32590.09	95975.097	57520.459	208539.71	96256.773	11055710.878	2265962.413	2575257.376
liver-670-FMT_35	4198	7786165	270625	342	3076	3518440.448	1529660	3612756	165608515	10092	74719253.979	3192769.207	1460203	85735933	3497715.955	2375	3007	6206	420460	322168	104769.232	4250454.455	440519.432	256021	18113413	17404.823	3783913	25535828	8855	29088	733900	416203	170103982.749	43796.722	19118.019	17057.219	533727.117	19076.784	15873.163	2811.042	92707.76	21162.116	63036.676	43653.301	138234.123	59394.798	9855905.493	7834969.823	4410339.238
liver-685-SPF_50	7277	8192688	311104	258	4829	3468060.379	980027	4256176	163237734	14864	35671451.574	5357837.538	1363758	110156715	5193144.018	7631	4559	10035	1135546	478461	111595.089	6777495.281	836886.798	219331	34275546	17823.966	8790291	27774042	8881	25950	684843	582165	246894883.475	82247.271	22948.763	34195.096	552358.762	44808.262	47790.727	7198.778	245665.873	42366.018	151044.525	87858.67	253814.329	112954.467	15655281.471	4695520.27	4618384.378
liver-675-FMT-AKK_40	6293	6287085	180599	257	5628	2424451.595	1650476	3761823	163533174	10350	47902420.632	4159889.924	1383687	116585340	3942479.557	2898	4424	7670	501834	422908	128592.459	3256037.456	752861.427	328699	35258136	16901.291	9113864	37053007	5997	29218	756895	720513	171110876.856	45573.77	8202.221	16545.5	516560.68	14116.268	20613.418	2220.24	176607.914	24336.5	62356.425	68381.301	124498.681	46883.129	11543484.219	3143847.488	5000956.278
liver-692-ATB_57	5725	4921865	187882	221	2719	2082217.899	916003	4870780	117203051	6292	25682954.397	3506515.237	1063446	164085444	4407758.592	2044	4841	1947	332682	316241	119502.284	2322161.365	397393.422	254583	28874081	10167.93	8916225	67949314	19742	19295	538324	679053	162281248.057	34638.335	16431.273	14918.03	572423.107	7551.261	15328.194	6915.254	89173.639	9919.329	34588.961	52865.983	126965.221	51726.058	13136166.107	2656192.654	2217522.724
liver-683-FMT_48	3504	5364623	229922	193	4809	1669016.257	85766	4452630	136206325	12441	8038283.735	2507808.413	1360784	166187123	4363720.89	4043	4099	8781	472719	366516	98838.267	4692597.129	343826.864	559014	20213879	16276.785	8548057	60640266	8303	23476	450702	841462	102734873.22	20949.209	8264.928	9645.526	532696.403	22550.768	11124.783	1177.962	47626.271	17254.8	33566.083	31666.475	72833.267	35605.193	6571307.755	624550.759	2249369.506
liver-689-SPF_54	2802	3704317	317558	185	11688	1397580.607	1050377	2126025	160297159	11135	4505392.852	2644388.048	2248849	165920764	3213455.909	25193	4604	11170	452807	333393	152922.11	5921518.236	446356.372	251460	32357610	15367.426	8874456	64316526	45016	22452	776536	848639	103516505.625	61118.078	11205.778	25710.628	503937.715	17274.466	22297.99	12064.093	123954.244	24672.845	97715.391	65884.427	220323.968	109793.717	3497907.345	411432.76	4190630.72
liver-680-FMT-AKK_45	4965	7526782	202325	160	7475	1832583.965	1028108	3301907	161774413	15119	17468588.657	2396264.682	1746439	74328491	3767696.321	5458	4525	8156	645242	359356	172253.051	6035823.311	276411.553	312310	22138432	17035.293	6434581	34703226	6418	23310	731819	771675	127877565.914	35898.589	7544.782	13847.868	443496.738	14693.404	14318.156	5932.788	145100.258	26382.35	40878.231	57581.249	139303.436	88712.784	8833719.621	1750121.174	4257945.535
liver-686-ATB_51	4533	3368040	223438	146	5139	1904284.646	452030	3867271	117836427	5527	24906710.837	3352626.152	936362	166049097	2668599.847	2610	3141	2325	259146	344130	83874.663	2614330.032	396834.875	244132	24522399	11384.047	9367479	96288123	31341	23008	656798	881006	142752886.726	35408.961	11036.941	15061.946	506623.966	14948.073	19170.119	8156.966	148313.673	17524.248	57052.955	93500.656	131469.634	70143.804	13847961.043	1374636.426	3618404.108
liver-676-FMT-AKK-Pas_41	6040	15032493	224862	112	3354	2763903.435	1045081	7760985	150054467	10494	57242138.321	4305230.198	2287872	166766778	3867629.104	3514	4258	11242	755051	534109	140420.226	4072026.745	691550.597	499885	22576236	13568.761	10840179	87513871	14017	70101	814264	1091808	180571143.195	51187.402	12048.565	14696.487	575954.425	28719.662	18361.342	4773.422	98149.384	27006.626	88040.561	48350.714	196875.774	74718.469	15024387.401	4602299.051	3790948.559
liver-682-FMT_47	3773	6474971	213604	114	3641	2457550.278	1243290	2523346	158167613	12390	29166759.639	3644638.838	2159941	166120816	3722983.597	6047	3421	11135	362734	335011	127796.421	5558179.493	424188.099	400838	16371179	22325.374	9396749	45611599	7320	54167	644134	759146	158588985.707	26868.464	12407.602	11597.317	512443.493	16495.725	12162.599	3745.592	129590.769	20072.7	52446.447	65774.252	144926.153	60436.236	6811639.934	2075405.007	4290061.853
liver-688-ATB_53	7222	3864144	154863	103	4446	1987450.044	957070	1363437	130652999	14897	17329591.844	3335035.103	1102424	166019114	3759518.936	6298	6026	4220	348192	349901	121808.996	5158385.595	461596.758	145275	11670719	12746.347	6034876	30467313	35285	38780	399643	516343	229472670.116	33786.056	12826.586	14808.075	532772.503	20324.556	13451.663	3497.951	70825.417	19902.967	55810.383	47004.329	137972.664	107436.165	9989769.058	1852248.899	4450760.549
liver-687-SPF_52	5955	4045701	335614	94	9263	2957474.561	1014317	2327175	153165972	12938	8030266.268	3787404.802	1348082	166155169	4113225.492	8909	4361	4303	421105	303765	112741.009	8639789.845	543067.219	252111	32484594	11002.123	6435411	33446271	16348	51596	502782	523637	210901357.218	95951.242	31812.487	65840.702	518232.392	103829.202	72245.133	24243.431	169863.988	158062.113	199488.823	73765.38	365500.873	179063.776	9194303.817	1295637.695	4420448.194
liver-679-FMT-AKK_44	5574	8792837	112504	102	6396	1819995.765	1595951	1764493	165627010	5915	20725139.901	3118215.25	1589251	121426496	2654505.334	2620	4217	3820	789414	340200	94864.177	9009595.775	732230.585	306588	18297073	20020.662	6825789	7128310	7869	49942	657459	650019	147281963.44	31209.506	2519.719	14004.924	553649.667	3389.714	16129.521	11043.988	124456.343	10219.314	24982.454	85181.745	73293.647	50988.706	8458865.159	1324618.964	4031186.724
liver-673-FMT-AKK-Pas_38	5453	6261190	128411	93	6543	2849161.923	1499848	4425812	155364454	10341	43163762.43	4462142.593	1902241	166200346	4183874.554	8221	4966	5325	619338	428103	137803.725	6432538.006	1209786.787	558540	23020755	10378.102	5516578	33240666	7601	60862	515703	463212	157754198.011	45850.615	10866.619	20065.341	492268.973	14542.846	22439.405	5445.847	265871.269	21382.668	50621.054	103047.622	145063.427	57683.043	10455355.576	4039197.343	5557723.193
liver-691-ATB_56	4864	5571800	196942	75	4918	2072930.435	1123240	5560208	118153830	9523	13100656.459	3492841.675	1483408	165617370	3326940.309	7429	5054	2989	342473	429400	134914.413	5704204.571	769034.788	652858	29673144	20747.807	9930357	102110620	233398	47352	746902	943569	259846083.029	58788.311	17630.766	33132.617	555782.433	34801.385	40625.251	13494.566	148715.3	40792.147	115823.445	72210.237	283347.018	191690.434	14845709.755	1512483.58	6836018.022
liver-678-FMT_43	4278	5543166	184668	64	2814	2291548.13	698281	5637278	118974956	8080	23626725.378	3149657.335	1678815	166445275	4156846.937	15449	3932	17936	389682	319252	112485.759	4485342.866	1008912.49	920897	28680962	8477.487	10933441	123171493	126252	23345	721320	978423	162212754.047	39356.706	14171.826	21268.419	521844.554	32590.825	23088.734	1442.183	69478.116	32038.395	66177.463	38158.485	202021.836	79138.177	10388896.464	1867850.179	3617863.654
liver-693-SPF_58	5369	2941080	108158	68	6865	2346656.648	931401	2481521	160280065	9166	16028178.832	2913115.898	1610713	143662944	2325759.835	3015	3573	9791	606174	309265	125030.849	8459641.467	989028.167	341090	27409759	12052.527	6210930	41457679	3363	71891	601642	651036	176480676.798	37341.356	6264.598	18433.156	499772.135	10284.545	21739.955	5197.159	90072.306	11817.726	45504.252	44817.276	123283.673	98526.228	5135642.985	1152531.142	4667805.624
liver-672-FMT-AKK_37	5365	5783495	171615	49	5073	1908420.72	761859	6401948	130405729	8884	13202176.273	4384875.702	1230516	166090319	3175890.383	4635	4380	7567	527985	465440	106699.86	6220635.657	751845.622	1086536	28089456	13592.924	11188120	83448607	14623	26450	522461	947147	168463843.698	26686.836	4747.908	12387.577	503581.258	16568.009	15141.299	2918.427	92586.949	16720.631	46401.412	48789.63	97019.873	41205.781	6730772.479	1060563.59	3290183.111
liver-671-FMT-AKK-Pas_36	6410	7900424	228772	74	6113	2558715.338	1133167	3865198	162986199	14006	29979923.416	5825850.009	2572615	165627548	3678682.689	2518	5786	12924	1132042	546654	133586.776	4582488.208	1033670.837	435232	24443338	10423.561	10874128	48184456	5457	26465	707986	833187	224821060.392	70122.488	25692.832	34328.566	544458.049	61279.028	33706.162	7976.753	133883.425	39649.987	104950.675	98415.464	242755.455	106649.091	18147177.611	2927528.606	7148975.887
liver-694-ATB_59	4287	3791815	167183	58	4122	1249749.136	1009174	3304264	95295028	9221	9243077.15	2603296.35	1026631	166255485	2896266.087	7372	3301	2009	262017	288104	100206.222	6025336.758	504171.405	1359424	22830205	10100.129	9762819	84873634	146106	23195	517692	903065	147796303.357	28734.324	4634.349	11669.036	589614.053	5438.164	11952.373	1250.803	49015.052	9036.653	32053.72	25094.275	76205.324	50489.412	5460360.162	728220.846	3771315.391
liver-669-FMT_34	4370	8349246	271109	38	4977	2933531.116	1110212	6454805	154170380	9569	43508119.104	4287225.419	1894200	165997795	3999131.403	6868	3117	16868	521853	419428	92953.053	3872716.849	716923.725	437843	25637771	11528.671	12769748	128382940	29943	25253	778483	1094966	189612774.654	55149.056	21844.098	19364.422	543260.936	44564.723	23818.773	8328.564	121832.412	34232.926	80330.797	73029.853	175449.943	73490.385	14627767.683	2392291.207	4300985.063
liver-695-SPF_60	4454	7438449	156525	59	3664	2090310.055	1242184	7210813	129565668	4372	80129742.467	4086564.406	1619783	166776955	2442899.414	6105	3903	16382	580997	336760	88151.932	2110320.624	719461.336	434906	25032772	8630.91	12467778	99984819	4255	24225	775528	1074797	144776043.39	75981.049	13035.406	31681.497	587206.099	10631.958	33549.39	8528.684	293612.955	17613.309	72787.043	123250.984	187154.656	66500.353	13471240.031	13376260.942	3362061.209
liver-674-FMT-AKK_39	7006	8360779	401223	45	4080	3085406.13	1214865	10089595	147682239	8361	16294794.394	4183757.291	1490786	165489314	3826973.088	3237	4408	13263	640194	527505	94653.409	5287542.491	763151.377	357996	31738586	11714.807	13257803	103176273	10846	30445	862662	1133106	196321620.761	39349.083	10036.226	14580.244	514678.11	30559.28	21026.78	2879.878	108226.368	34310.445	73088.621	59961.21	176505.158	68626.679	10219907.023	1898133.048	2969017.466
St_mix_pre	29906	NA	NA	3601	21696	NA	NA	NA	NA	8077	NA	NA	NA	NA	NA	NA	NA	NA	NA	NA	NA	NA	NA	NA	NA	NA	NA	NA	NA	749	NA	NA	NA	NA	NA	NA	NA	NA	NA	NA	NA	NA	NA	NA	NA	NA	NA	NA	NA
St_BA1_pre	NA	NA	NA	NA	NA	NA	NA	NA	NA	NA	NA	NA	NA	NA	NA	10267	NA	NA	NA	NA	NA	NA	NA	NA	NA	NA	NA	NA	1330	NA	NA	NA	NA	NA	NA	NA	NA	NA	NA	NA	NA	NA	NA	NA	NA	NA	NA	NA	NA
St_BA2_pre	NA	NA	NA	NA	NA	NA	NA	NA	NA	NA	NA	NA	NA	NA	NA	11512	NA	NA	NA	NA	NA	NA	NA	NA	NA	NA	NA	NA	209548	NA	NA	NA	NA	NA	NA	NA	NA	NA	NA	NA	NA	NA	NA	NA	NA	NA	NA	NA	NA
St_AA_post	NA	17267	178023	NA	NA	62249171.932	616	9877102	1753819	NA	NA	153575.648	23820	14575924	NA	NA	502	1953	13922	16915	55756.891	19660.44	32706025.799	353	2434602	4781.313	1838144	97993605	NA	NA	596384	822660	NA	NA	NA	NA	777074.134	NA	NA	NA	7402.175	NA	NA	NA	NA	NA	2974.008	NA	NA
St_AA_pre	NA	33861	23021	NA	NA	58179179.527	437	11266361	1287555	NA	NA	168495.484	616	4151468	4350.463	NA	466	10469	11718	9734	62923.193	28858.075	31534200.685	87	1684538	12615.059	19369339	91940587	NA	NA	3471811	2676239	21491.505	1085.029	NA	NA	558313.616	NA	NA	NA	1770.117	NA	NA	NA	NA	NA	NA	NA	NA
St_mix_post	NA	NA	NA	NA	NA	NA	NA	NA	NA	NA	NA	NA	NA	NA	NA	NA	NA	NA	NA	NA	NA	NA	NA	NA	NA	NA	NA	NA	NA	9014	NA	NA	NA	NA	NA	NA	NA	NA	NA	NA	NA	NA	NA	NA	NA	NA	NA	NA	NA
St_BA1_post	NA	NA	NA	NA	NA	NA	NA	NA	NA	NA	NA	NA	NA	NA	NA	22483	NA	NA	NA	NA	NA	NA	NA	NA	NA	NA	NA	NA	1340	NA	NA	NA	NA	NA	NA	NA	NA	NA	NA	NA	NA	NA	NA	NA	NA	NA	NA	NA	NA
St_BA2_post	NA	NA	NA	NA	NA	NA	NA	NA	NA	NA	NA	NA	NA	NA	NA	3600	NA	NA	NA	NA	NA	NA	NA	NA	NA	NA	NA	NA	196057	NA	NA	NA	NA	NA	NA	NA	NA	NA	NA	NA	NA	NA	NA	NA	NA	NA	NA	NA	NA
[truncated: 176 more columns]

## Sheet: AreaQCCorr
Sid	2-hydroxybutyric acid@2.50-sf	2-hydroxyglutaric acid@13.18-gc	2-oxoglutaric acid@13.19-gc	2-oxovaleric acid@14.57-sf	3-hydroxybutyric acid@1.67-sf	3-methylhistidine@0.98-qppos	4-hydroxymandelic acid@15.39-gc	4-hydroxyproline@12.61-gc	5-oxoproline@12.54-gc	Acetic acid@1.79-sf	Acetylcarnitine@1.23-qppos	Acetylcholine@1.06-qppos	Adenine@16.39-gc	Alanine@7.03-gc	Allantoin@1.09-qpneg	Alpha-muricholic acid@6.01-ba	Alpha-tocopherol@29.55-gc	Anthranilic acid@13.61-gc	Arabinose@14.34-gc	Arabitol@14.98-gc	Arachidic acid@23.87-qpneg	Arachidonic acid@20.31-qpneg	Arginine@0.98-qppos	Asparagine@14.30-gc	Aspartic acid@12.54-gc	Behenic acid@25.17-qpneg	Benzoic acid@8.94-gc	Beta-alanine@11.33-gc	Beta-muricholic acid@6.30-ba	Cadaverine@4.75-pa	Capric acid@11.63-gc	Caprylic acid@9.12-gc	Carnitine@1.00-qppos	Carnitine C10:0@12.24-qppos	Carnitine C10:1@11.45-qppos	Carnitine C12:0@14.00-qppos	Carnitine C12:1@10.61-qppos	Carnitine C14:0(OH)@13.73-qppos	Carnitine C14:1@14.74-qppos	Carnitine C14:2@13.95-qppos	Carnitine C16:0@17.32-qppos	Carnitine C16:0(OH)@15.28-qppos	Carnitine C16:1@16.19-qppos	Carnitine C18:0@19.08-qppos	Carnitine C18:1@17.76-qppos	Carnitine C18:2@16.80-qppos	Carnitine C3:0@1.58-qppos	Carnitine C4:0@2.62-qppos	Carnitine C4:0(OH)@1.42-qppos
BlM_pre	65.453	11.28	43.482	1993.629	514.096	10711.99	44.365	17.467	8901.292	13184.595	8141.06	NA	180.573	3205.899	52334.933	1086.113	210.489	3170.358	54.551	8.133	1340300.577	275472.997	967946.08	39.336	78.117	108618.122	617049.693	64.722	1095.059	479875.816	5046.935	783.396	118190.885	NA	NA	NA	6374782.74	NA	NA	NA	NA	NA	NA	NA	NA	NA	NA	NA	NA
BlM_post	79.439	206.125	535.245	1004.914	636.901	41930.555	13.376	179.229	8170.377	13998.543	98746.602	NA	3069.359	6771.029	66012.343	861.151	119.177	21140.414	115.206	187.042	1114165.798	994581.518	919005.164	40.082	291.266	108285.458	138544.889	54.136	934.944	195677.216	13946.574	360.743	825837.451	10110.311	NA	NA	4649714.034	NA	NA	NA	NA	NA	NA	NA	NA	NA	3454.766	10063.394	NA
QC_liver_6a	44312.367	NA	NA	932.104	42073.773	13435877.334	NA	NA	NA	95901.423	195889845.949	20960626.393	NA	NA	18564069.844	NA	NA	NA	NA	NA	1016613.684	37185654.967	5115241.549	NA	NA	92769.266	NA	NA	NA	383820.046	NA	NA	831005136.997	405913.747	98314.675	220366.684	5369295.982	299497.159	455981.916	65600.816	2039355.948	430946.276	1028170.704	1371106.672	2822383.735	1261250.771	55436945.543	27387345.428	23790078.192
QC_liver_8a	NA	8487340.118	278555.173	NA	NA	NA	1173110.368	6484443.595	360117230.758	NA	NA	NA	2769223.117	533697300.859	NA	NA	5735.485	8248.638	735877.541	336314.177	NA	NA	NA	447972.645	42077880.737	NA	20561305.08	129211248.285	NA	NA	1013083.003	2003054.601	NA	NA	NA	NA	NA	NA	NA	NA	NA	NA	NA	NA	NA	NA	NA	NA	NA
QC_liver_7a	NA	NA	NA	NA	NA	NA	NA	NA	NA	NA	NA	NA	NA	NA	NA	32858.522	NA	NA	NA	NA	NA	NA	NA	NA	NA	NA	NA	NA	213580.48	NA	NA	NA	NA	NA	NA	NA	NA	NA	NA	NA	NA	NA	NA	NA	NA	NA	NA	NA	NA
QC_liver_6b	44539.986	NA	NA	661.368	42253.967	12559524.63	NA	NA	NA	95519.905	194247749.983	18841845.889	NA	NA	18426565.911	NA	NA	NA	NA	NA	1059635.136	36471531.937	4590151.178	NA	NA	103323.531	NA	NA	NA	404429.665	NA	NA	755356603.892	365950.817	109103.108	173865.419	3762073.397	284277.883	457653.021	54627.099	1868966.079	388323.265	912621.645	1320030.481	2785308.78	1121757.691	56055246.486	26209299.41	17721931.583
QC_liver_8b	NA	9828002.885	330000.723	NA	NA	NA	1992615.218	4843506.525	380787836.524	NA	NA	NA	2775124.513	202047197.014	NA	NA	6697.162	7566.464	893790.955	303865.54	NA	NA	NA	686954.595	36730168.679	NA	16028645.278	62213531.034	NA	NA	991512.075	1516431.422	NA	NA	NA	NA	NA	NA	NA	NA	NA	NA	NA	NA	NA	NA	NA	NA	NA
QC_liver_7b	NA	NA	NA	NA	NA	NA	NA	NA	NA	NA	NA	NA	NA	NA	NA	34455.483	NA	NA	NA	NA	NA	NA	NA	NA	NA	NA	NA	NA	216532.044	NA	NA	NA	NA	NA	NA	NA	NA	NA	NA	NA	NA	NA	NA	NA	NA	NA	NA	NA	NA
QC_liver_6c	43034.15	NA	NA	678.52	40837.131	11664879.5	NA	NA	NA	92419.11	183298302.785	18274726.369	NA	NA	18524954.997	NA	NA	NA	NA	NA	976767.411	32772068.826	4518639.719	NA	NA	128516.442	NA	NA	NA	376601.202	NA	NA	696499339.387	320455.729	100838.21	198776.244	3737405.482	230433.412	374236.844	56950.621	1742609.789	383242.349	890233.173	1181077.018	2507667.564	932133.543	49383229.226	24314216.556	18646576.835
QC_liver_8c	NA	11164638.525	377702.643	NA	NA	NA	2033298.542	6530736.568	360425104.434	NA	NA	NA	2964179.317	559507743.974	NA	NA	5683.582	10939.453	1053139.002	304645.481	NA	NA	NA	346533.243	40280376.635	NA	15439826.93	98535775.112	NA	NA	1202507.971	1640568.368	NA	NA	NA	NA	NA	NA	NA	NA	NA	NA	NA	NA	NA	NA	NA	NA	NA
QC_liver_7c	NA	NA	NA	NA	NA	NA	NA	NA	NA	NA	NA	NA	NA	NA	NA	34921.02	NA	NA	NA	NA	NA	NA	NA	NA	NA	NA	NA	NA	209342.243	NA	NA	NA	NA	NA	NA	NA	NA	NA	NA	NA	NA	NA	NA	NA	NA	NA	NA	NA	NA
QC_liver_6d	44558.429	NA	NA	642.205	41739.354	12596703.251	NA	NA	NA	97567.076	199662346.237	19034636.993	NA	NA	19551611.841	NA	NA	NA	NA	NA	1096078.783	28910058.576	5170986.292	NA	NA	120357.975	NA	NA	NA	375618.202	NA	NA	727020463.072	345241.339	65370.229	181144.316	3702089.558	250017.757	422533.532	42942.891	1904582.946	418004.622	910481.94	1293081.23	2599413.243	1017841.679	52905636.13	26765190.327	18462626.695
QC_liver_9a	NA	9891961.532	328059.321	NA	NA	NA	1994550.935	5554575.235	365472383.008	NA	NA	NA	2855112.389	301567601.391	NA	NA	7175.497	9171.354	1020185.69	309955.051	NA	NA	NA	601538.064	40453849.715	NA	16914934.151	79005927.488	NA	NA	902314.803	1681720.888	NA	NA	NA	NA	NA	NA	NA	NA	NA	NA	NA	NA	NA	NA	NA	NA	NA
QC_liver_7d	NA	NA	NA	NA	NA	NA	NA	NA	NA	NA	NA	NA	NA	NA	NA	32972.053	NA	NA	NA	NA	NA	NA	NA	NA	NA	NA	NA	NA	212512.016	NA	NA	NA	NA	NA	NA	NA	NA	NA	NA	NA	NA	NA	NA	NA	NA	NA	NA	NA	NA
QC_liver_6e	44461.147	NA	NA	819.062	42500.741	12000901.315	NA	NA	NA	94472.534	187138473.156	19345684.455	NA	NA	19135092.376	NA	NA	NA	NA	NA	1063998.945	31308908.959	4469024.891	NA	NA	93241.28	NA	NA	NA	374685.5	NA	NA	736402648.54	342503.858	84356.555	206290.814	3992137.528	269083.824	422394.238	55963.371	1843588.063	382465.835	919088.16	1320645.094	2647458.82	1001526.188	56965780.775	26044410.774	20344535.704
QC_liver_9b	NA	10461976.266	335510.697	NA	NA	NA	2117401.463	4175082.477	438382221.278	NA	NA	NA	2933440.301	138691068.849	NA	NA	6062.287	10344.903	1060658.52	312752.015	NA	NA	NA	515389.421	33858524.208	NA	16054150.425	58514481.823	NA	NA	960730.82	1142693.638	NA	NA	NA	NA	NA	NA	NA	NA	NA	NA	NA	NA	NA	NA	NA	NA	NA
QC_liver_7e	NA	NA	NA	NA	NA	NA	NA	NA	NA	NA	NA	NA	NA	NA	NA	33258.887	NA	NA	NA	NA	NA	NA	NA	NA	NA	NA	NA	NA	214950.818	NA	NA	NA	NA	NA	NA	NA	NA	NA	NA	NA	NA	NA	NA	NA	NA	NA	NA	NA	NA
QC_liver_8d	NA	10744049.232	337734.407	NA	NA	NA	2149424.558	7544518.804	373527010.62	NA	NA	NA	3251599.653	356972070.158	NA	NA	7250.405	13744.145	1016912.472	357981.387	NA	NA	NA	707945.175	47192154.051	NA	19591449.546	107329323.205	NA	NA	875293.102	1614654.287	NA	NA	NA	NA	NA	NA	NA	NA	NA	NA	NA	NA	NA	NA	NA	NA	NA
QC_liver_6f	NA	NA	NA	NA	NA	13606987.259	NA	NA	NA	NA	194663148.912	19102079.857	NA	NA	17980666.988	NA	NA	NA	NA	NA	959737.394	37877234.218	5315446.521	NA	NA	115702.958	NA	NA	NA	NA	NA	NA	788788020.841	388196.036	118513.886	180863.695	4206053.101	251895.774	412371.482	50965.484	1802893.753	437527.323	922525.343	1192256.917	2681715.299	1136561.788	49330556.984	25165759.935	19263181.404
liver-666-FMT_31	39474.936	12957983.068	219541.538	788.576	36122.652	15354278.739	3723007.11	3667909.541	404187203.456	40895.755	775617075.63	30019324.939	3914844.524	498661003.495	18254591.07	41230.677	7523.598	12098.336	710761.485	207119.23	860405.035	16627792.149	5267170.065	417786.665	27513843.401	120981.705	14363210.499	53798462.023	42492.277	353786.883	806520.707	1452737.017	778638710.278	862547.609	240764.601	314285.146	5370734.981	122557.435	739545.426	107632.078	4020554.789	263236.153	1053993.972	2162535.777	2899768.818	1230237.22	160159788.319	100872764.638	30648016.286
liver-667-FMT-AKK-Pas_32	58456.937	15921283.928	225853.21	784.055	28397.418	22084462.378	937548.925	14367232.228	375441478.059	93400.813	202084612.674	30514368.191	2781693.443	369572395.331	20784063.828	16378.993	6197.13	9902.568	720696.118	354282.915	858720.98	33485868.092	7875453.254	882495.58	44755944.683	109126.522	12914023.592	146844780.71	63519.236	391418.107	837509.556	1434910.876	1082360523.898	523712.171	102371.84	246264.885	5206177.744	606965.241	603109.832	47287.147	2484123.151	1495714.404	1815426.101	1332597.871	5586238.853	2037499.986	69677561.014	39019554.456	25396047.448
liver-684-SPF_49	45340.963	10875242.916	294397.051	798.371	62060.947	13161771.008	922606.812	9389036.998	384749866.092	111172.719	46466716.537	24839960.8	3527891.926	501128970.292	15143770.814	76143.659	7110.9	19528.013	700194.506	286811.533	918926.554	74370900.302	5711086.357	898060.647	60158970.524	129251.314	14200647.387	120153661.535	139541.787	219327.579	1205813.625	1521706.945	962208790.552	531661.524	43623.961	397116.461	4532533.796	1212324.213	832415.493	126807.045	2143221.412	2125462.36	1257394.421	1428387.985	3095312.291	2431913.68	29628956.851	14102856.719	29382278.034
liver-668-FMT-AKK_33	25331.992	7676171.793	523587.96	723.317	43357.506	8216094.042	287157.976	4954628.77	382068315.241	70869.278	64027556.044	13771158.052	3022175.581	296780687.769	19193289.698	33607.523	4541.203	9473.257	987083.817	253252.323	883022.146	32861274.44	1842078.81	354710.523	47122638.877	116573.255	16113259.985	102335589.633	54108.953	310752.721	958636.925	1377118.044	416460629.547	159318.236	76829.017	79812.716	5552370.28	121579.463	214177.039	20263.094	1697610.796	206504.052	798379.238	870151.343	2584234.89	884886.179	17505001.687	6593052.184	9815722.635
liver-690-ATB_55	29454.838	5978873.355	276969.738	800.333	23304.225	8181279.969	186524.878	3476049.026	297413351.317	57146.533	135774291.555	13021888.092	1710683.459	268826849.488	17270513.142	6325.616	4418.798	3753.592	482910.592	154003.624	4910810.637	28922806.189	2628019.197	429685.462	23347111.951	437293.227	14881989.313	95161183.301	109478.933	147194.403	961159.097	1292718.413	810783311.011	228547.734	72812.467	137337.709	4838842.234	218768.092	372118.126	24208.404	1048148.195	287767.91	619658.749	650371.683	1568442.26	830960.09	47501818.277	10973935.017	12460894.673
liver-681-FMT-AKK-Pas_46	47173.896	16614329.169	350859.224	641.814	21057.833	14836127.527	176526.082	9680316.5	346864997.825	71737.15	123406099.672	24702472.175	2373468.502	364793718.91	17296490.872	17747.886	5928.683	15802.841	1192217.798	317423.885	1402987.102	43116807.282	2591494.977	500690.191	42436137.065	150991.07	14387355.167	129732586.548	53460.558	361958.117	1055698.634	1838242.499	808072893.103	283884.072	120980.547	186773.085	3587445.165	276754.706	391227.64	26611.809	1512356.431	388804.78	1139770.715	1041422.3	3175277.113	1230456.249	57226226.485	21334152.601	11655517.55
liver-670-FMT_35	34582.988	10625057.341	369960.306	662.225	25511.006	17188115.027	2626386.458	3867770.221	479206193.312	85758.48	469592114.477	17530567.214	2613978.555	55442048.92	18788948.681	16818.619	4396.807	5846.731	796500.849	216006.058	982633.935	25726958.087	2308284.708	447251.911	23960018.029	139517.984	13681285.692	41122012.967	67914.441	434796.525	1073562.919	1609283.917	725025309.288	333754.923	128358.652	130962.411	3489728.524	163974.916	257242.32	11884.684	1175489.805	233420.132	724242.799	855675.159	2229042.297	775687.525	51770856.204	61953173.953	20704026.436
liver-685-SPF_50	60006.094	11262695.461	420472.671	578.206	39792.459	17556411.943	1720200.123	4486836.851	426561661.979	124029.242	244911866.697	25654335.791	2516626.378	93035178.522	28398212.464	57493.35	6547.999	10414.058	1923956.62	326072.508	1154704.63	40845079.735	3941184.623	495501.953	45525184.057	119236.164	17877597.431	29853797.501	68201.319	297346.289	870958.675	1299567.872	1049868742.707	573469.459	205489.225	311915.063	3586761.086	414626.96	754832.386	79431.568	3177267.419	509571.714	1811054.612	1718470.033	4608231.148	1445441.136	78163853.855	43578547.828	21301612.818
liver-675-FMT-AKK_40	52739.61	8643240.698	253531.093	661.755	45873.448	13056776.159	2819071.717	4177503.672	445980064.206	85550.512	289434254.36	20611708.947	2576303.512	116257579.005	20109057.587	20300.319	6790.197	8911.891	881574.776	306584.198	983823.144	23886317.373	3972780.784	426994.314	47019178.145	118647.388	16224912.708	40945207.886	46319.566	374840.281	999435.931	1288640.499	770506005.243	350568.277	72426.003	136993.832	3675404.174	124870.146	320534.914	13033.31	2488382.196	324045.503	682615.981	1372007.405	2038418.431	502625.929	61476835.203	29384363.405	21651337.609
liver-692-ATB_57	48528.458	7067235.015	270970.449	591.242	22345.013	10283153.403	1569255.941	5594062.916	264291967.607	52964.278	164457968.128	18151108.312	1933538.395	185761061.37	24859438.983	14008.009	6683.712	2245.933	626941.029	219788.739	1075341.685	16241235.451	1929460.261	469972.244	42468270.649	98750.296	16137887.59	84019342.735	152880.651	227946.069	696222.234	1309921.998	677224700.089	269075.23	128539.75	103615.297	3663276.092	49690.072	236056.729	36684.623	1009886.804	94508.471	431094.354	944935.846	1729029.151	567241.137	72291940.334	23835262.928	9350393.609
liver-683-FMT_48	29966.649	8493148.118	373450.195	580.201	38967.438	10403680.751	127730.111	6255060.729	341981850.351	102984.966	51119416.19	13391859.715	2506637.605	351073631.944	23499587.851	30100.286	6023.625	10490.561	807965.632	263656.245	1141358.023	27517764.188	2058109.812	820697.898	33203212.999	123098.062	14396811.106	105972663.001	63566.774	303853.735	857138.511	1352103.238	433980344.113	146474.141	50130.445	67745.439	3305175.055	184764.391	151415.126	2756.007	630946.287	183058.256	343362.789	534926.318	1114891.318	404709.135	34524598.744	7539503.579	10453405.657
liver-689-SPF_54	23079.64	5392536.518	469167.745	560.459	94145.682	8403063.813	1931284.35	2788131.313	395261899.88	93972.372	29003582.285	14402930.052	4172184.563	393118018.758	18220238.218	127414.37	6966.166	11559.275	821404.98	228626.189	1156901.851	40273070.339	2096448.5	506239.705	47229370.313	116348.663	13373825.657	77178084.739	343007.597	244604.868	1120152.61	1316808.071	459288334.441	333922.735	65370.306	186981.46	3366349.601	139971.148	470982.614	86424.393	1738083.957	246440.386	1146134.974	1059287.904	3380643.175	1465512.61	19482202.323	4940552.85	18092742.896
liver-680-FMT-AKK_45	41246.337	10576421.094	281892.564	517.414	60028.204	10430875.608	1830764.267	4460389.579	379620477.529	124264.207	115097101.394	12669421.016	3308202.566	93413530.289	21529647.582	42108.729	7603.298	7783.441	1238051.614	305482.119	1278465.715	40791104.139	1881810.051	545440.422	32718829.013	135781.12	17352102.859	66999085.851	51424.702	279473.387	943607.505	2435749.559	564642405.806	268590.336	54074.658	107516.898	3203264.466	135371.299	267266.356	36183.171	1936593.941	338633.07	569060.259	1199820.556	1999850.949	955415.774	41016530.547	18670123.475	18303160.413
liver-686-ATB_51	36348.114	5059593.309	321023.755	582.542	40601.472	10725001.798	643744.175	5464706.737	245388391.661	45835.907	152383341.97	16972656.414	1774828.653	440982628.314	14939004.99	13683.247	3880.978	2949.005	439096.652	249110.645	880715.64	16728460.2	2165478.874	371412.642	38677860.005	108211.408	13861954.551	126751948.376	238804.539	223612.858	986198.517	1376662.039	614083144.496	297910.789	114915.736	132271.934	3500848.753	137442.311	315971.057	52344.891	2046676.329	192731.938	607647.812	1711909.518	1968681.552	847642.618	64037152.152	12466435.524	16767147.189
liver-676-FMT-AKK-Pas_41	47952.985	23370736.317	348423.157	515.737	27818.855	15854077.213	1891919.608	13852668.568	340870968.058	85455.234	338778574.223	23152507.548	4551493.621	833570689.116	19098524.596	26093.33	6718.63	14022.321	1397469.108	424772.725	1110794.535	30735666.561	4258352.478	771739.904	39445566.885	109674.663	16209160.956	137314204.113	110479.966	687804.82	1050756.185	1854179.559	820391894.76	367241.129	116527.38	147199.201	3753020.698	266652.469	295586.133	32301.693	1232833.224	296898.209	1066688.574	1005874.016	2914974.408	1130388.08	72106788.642	39749987.066	17539963.888
liver-682-FMT_47	30424.769	9804799.634	324246.501	570.725	31061.589	13544179.573	2227696.88	4436094.618	342645859.35	105618.216	164339655.686	18447710.875	4278932.479	545541205.756	20606276.708	45033.777	5447.632	13994.267	581714.752	268371.602	1174831.839	38757843.977	2225548.952	980508.317	28536334.294	154462.651	16393017.946	88022356.116	58374.834	628997.692	1000873.612	1420804.215	714624923.939	222093.256	98661.56	117207.247	3644456.313	147580.095	250848.896	12725.056	1816942.713	236360.802	710039.555	1242481.768	2291814.84	901742.643	36011683.202	20566904.375	18817525.963
liver-688-ATB_53	59842.107	7032782.9	273933.639	566.163	37067.197	10833364.13	1879558.282	3560180.261	288590797.614	124770.128	107046120.394	17509385.916	2438204.317	571285013.42	20808042.438	62720.94	9248.218	8124.832	630662.486	353476.347	1047546.975	42365371.566	2293412.177	582743.938	33394831.201	113575.082	17687510.65	127852546.263	273979.625	406987.502	780517.072	1420629.54	968663790.257	237963.981	103241.492	117682.617	3628564.988	192025.01	268427.484	22870.63	1004650.88	283038.256	747594.937	873704.373	2462899.739	1401906.966	55632662.827	16894978.566	20869069.345
liver-687-SPF_52	49125.717	6905111.663	577398.763	559.896	76082.71	15865597.871	1910048.767	5641455.087	347746518.468	109670.294	55856348.131	19112599.811	2904402.594	714049585.194	21515202.99	64216.146	7577.199	4900.672	718102.965	333938.604	987530.544	59027117.673	2554809.122	825273.643	87985846.109	104303.535	18176765.697	126171291.314	131693.625	515370.296	932958.419	1612629.125	921065250.79	781563.142	361010.233	635151.741	3929048.603	1204609.702	1568222.183	336415.203	2823709.998	1989320.214	2800889.908	1536643.555	5835266.122	2783259.76	46175434.017	13483745.637	19633326.484
liver-679-FMT-AKK_44	45633.276	13683443.615	171496.499	630.246	51379.021	9735337.456	2891211.703	4139373.608	410920018.823	50292.401	141434467.453	15780725.154	3511435.93	547237265.645	13950374.888	19292.78	7058.281	6337.013	1150496.789	315604.688	955528.153	58010048.295	3616134.234	753563.643	34775227.125	127462.094	14979634.435	39563018.054	62062.412	647687.526	1270332.52	1455587.758	673630734.228	218307.559	14224.724	106194.274	4013296.17	13130.551	257860.642	77985.06	1664196.76	78663.129	289197.869	1540363.08	1224625.013	755378.269	40396022.269	12737837.844	16433224.794
liver-673-FMT-AKK-Pas_38	43785.972	10465056.034	214425.697	651.291	54512.441	14342253.838	2843279.139	13027856.19	324892407.453	89733.072	286185555.749	21423061.77	4304907.323	871337493.711	22783731.836	62334.769	6218.772	8275.906	984119.7	394289.527	1156783.324	43731070.52	5615070.332	1077209.057	63551931.14	106302.235	19758941.193	173072441.859	63447.852	764753.136	904756.957	1931288.184	681495360.31	327289.158	94959.06	196294.798	3576346.244	139714.616	361475.995	31658.195	3585425.324	273727.903	658371.747	1976200.313	2144597.661	697070.425	55667721.158	36938352.525	25021028.902
liver-691-ATB_56	39834.826	9217167.714	316494.026	694.145	39818.795	11196315.269	1955610.305	15555598.462	218028195.624	78766.218	89359653.658	17502360.185	3223512.343	1296856277.714	18425868.035	52677.932	8228.696	5492.62	512113.386	382681.179	1245185.831	41871930.678	3870653.38	1466620.915	64394036.454	156586.643	16864503.845	245204356.349	1832868.477	493745.326	1381242.547	1859468.429	1111126627.373	491376.733	221267.488	340457.151	3816270.818	349956.137	907606.877	163232.277	2097245.742	483146.752	1736977.372	1381861.142	4915490.346	2792273.802	77291336.739	14556530.712	31498827.29
liver-678-FMT_43	35002.763	9454684.829	319626.789	563.04	22953.351	12029439.353	1144431.177	17913484.943	212954402.327	67427.141	140020287.642	16714846.293	3730689.814	1499299244.881	22308968.543	99422.988	4807.806	37547.496	557347.062	271317.426	1013628.011	32382456.233	4700593.798	2266876.059	65164994.157	67816.465	18926347.976	353176790.982	1008413.44	337811.903	1359532.686	2011050.035	683985331.82	296041.851	142822.731	173189.219	3812837.893	318569.204	347903.839	13134.877	1132220.79	395597.928	898681.876	782705.4	2710523.091	1129117.342	52359402.45	18331997.495	15753986.433
liver-693-SPF_58	43140.108	5125880.096	182045.189	767.842	53400.264	12001190.441	1899875.758	8893642.168	319467753.982	77182.794	106404577.005	15788704.279	4080760.628	1960947543.947	12183727.083	22122.878	4149.89	17408.547	889804.104	289769.493	1151304.498	69346954.621	4713319.216	1250877.997	62080134.594	117329.419	13426038.746	127010327.606	27359.478	947598.305	1119112.126	1485269.771	773589347.686	254640.363	39809.174	167819.526	3877908.146	69986.862	398851.087	47331.314	1368043.722	125018.919	642049.969	936793.415	2005542.657	1293033.866	25546278.099	12464129.245	22015839.265
liver-672-FMT-AKK_37	42402.341	11533405.086	331043.572	486.949	39739.141	11012563.179	1278267.867	26948577.727	260282003.873	73900.513	90884060.841	21827210.389	2975883.126	2069480095.826	16822746.39	33604.172	6750.467	14972.609	812545.963	469133.088	1067147.347	48977018.279	3904240.98	2177485.864	77990435.224	108456.864	21331788.004	335159877.133	117724.599	393151.836	1374837.729	2183811.125	735102084.935	202204.903	22968.495	127501.591	4093809.363	147650.114	233219.124	30331.245	1467904.082	196605.913	643636.107	989334.992	1518225.76	589572.629	33484288.49	10207925.668	15288655.028
liver-671-FMT-AKK-Pas_36	50699.52	13547423.373	381344.742	1000.397	50098.291	12160317.857	2202224.467	11773871.948	351159278.274	114032.892	205774876.115	29140718.818	5866924.376	770705880.289	19179324.423	16465.54	8048.687	24920.751	1561423.228	484142.8	1113895.449	38538339.161	4579303.759	922082.416	53108025.791	98335.257	22533576.891	144955365.764	44257.73	402449.259	1253718.9	2240206.875	1044235139.647	543979.695	300072.567	321939.004	4182944.538	535225.265	570886.068	87414.377	2143577.508	483990.314	1577210.225	1566696.546	3794524.141	1584379.855	92287617.648	28593707.539	32825268.032
liver-694-ATB_59	34356.932	7777308.827	333487.209	764.993	33708.443	6802800.386	1832324.074	14283002.278	168373649.556	76066.398	48282922.197	13403216.101	2487538.898	1983842927.436	16506192.042	34595.429	5715.616	4287.507	425254.253	263790.638	1186216.888	49502471.36	2481051.025	3199672.906	60260450.075	92930.243	19477102.391	307819977.179	1172495.767	283682.545	1352543.991	2144410.885	668408521.176	228346.683	34154.277	106260.655	4258087.634	33415.409	162858.275	4308.869	779432.513	92706.645	446561.704	502905.956	1163990.654	577973.729	26154652.501	6809325.321	17244168.917
liver-669-FMT_34	33696.759	12982690.203	429341.327	696.827	38875.602	17015786.351	1775865.658	13304067.344	335781717.819	79700.956	246467136.226	21770671.502	3804165.677	803185790.611	22822617.41	46217.854	5315.44	27966.983	844819.303	309897.127	986918.396	32839183.253	3349612.212	785983.271	48560175.415	95869.051	20573300.784	244063761.986	233120.49	354505.435	1217831.036	1930778.235	830721894.125	409621.174	249031.79	202472.244	4174007.676	413335.835	541978.554	86806.732	1873461.201	406951.486	1189148.091	1103691.921	2924840.839	1308692.763	72796848.498	23984558.543	19113968.279
liver-695-SPF_60	35911.866	12184883.427	259965.317	1023.632	29674.38	11165453.04	2218765.266	19123530.625	241997397.922	35499.904	496523324.227	20263902.407	3582952.863	1380432941.901	12963667.405	45247.25	5324.786	28703.952	823687.986	263211.095	947227.139	18491830.527	3763372.032	1011527.532	50841385.473	82963.701	20080953.445	229850929.959	35362.989	322273.067	1355878.126	2041011.906	640390521.294	603335.529	212249.093	294351.984	4303796.207	93350.414	627113.926	70953.57	4231712.037	228871.531	1030500.203	2775422.799	2995721.908	963280.063	70661915.334	116527594.034	15708242.134
liver-674-FMT-AKK_39	53779.248	13803096.585	659467.535	876.282	33737.6	15631170.324	2265704.986	24296889.673	310231291.989	69241.44	108687442.301	22501473.625	3270014.125	1299876936.608	20770173.601	24361.227	6685.033	18838.044	1065942.302	439416.146	1204829.264	44062004.679	4020775.957	612191.844	64497542.871	96460.995	22043510.049	214636240.81	86168.706	421050.913	1539895.724	2113007.155	826751745.874	317257.542	138526.154	130685.194	4096331.875	309020.603	327447.408	22796.914	1709698.51	363807.956	1111263.906	1168997.414	2657889.021	937183.74	50680191.808	17740287.265	13571796.666
St_mix_pre	288478.436	NA	NA	47.306	156336.477	NA	NA	NA	NA	83764.664	NA	NA	NA	NA	NA	NA	NA	NA	NA	NA	NA	NA	NA	NA	NA	NA	NA	NA	NA	230083218878693312	NA	NA	NA	NA	NA	NA	NA	NA	NA	NA	NA	NA	NA	NA	NA	NA	NA	NA	NA
St_BA1_pre	NA	NA	NA	NA	NA	NA	NA	NA	NA	NA	NA	NA	NA	NA	NA	29617.964	NA	NA	NA	NA	NA	NA	NA	NA	NA	NA	NA	NA	40105.771	NA	NA	NA	NA	NA	NA	NA	NA	NA	NA	NA	NA	NA	NA	NA	NA	NA	NA	NA	NA
St_BA2_pre	NA	NA	NA	NA	NA	NA	NA	NA	NA	NA	NA	NA	NA	NA	NA	23179.054	NA	NA	NA	NA	NA	NA	NA	NA	NA	NA	NA	NA	1530504.969	NA	NA	NA	NA	NA	NA	NA	NA	NA	NA	NA	NA	NA	NA	NA	NA	NA	NA	NA	NA
St_AA_post	NA	26001.562	256971.452	NA	NA	67749522.128	1165.986	8969758.328	4203738.234	NA	NA	715926.739	70484.411	8465685.325	NA	NA	324.225	1692.635	28591.554	10251.19	1469033.907	4180577.55	34216761.184	522.689	3016997.373	48873.434	3282821.206	85561377.04	NA	NA	846440.305	1273322.431	NA	NA	NA	NA	408741370.074	NA	NA	NA	403121.59	NA	NA	NA	NA	NA	957.68	NA	NA
St_AA_pre	NA	642339578.863	188507779.077	NA	NA	319449365.31	165973.587	2.27275335685839e+29	93.624	NA	NA	870849.237	51391574.869	1.09462939380038e+39	21738.217	NA	809.769	657731283391077	0.33	2402253494.399	639797.269	661000.769	155237106.382	5806211053.474	23448341375316192	78765.741	1123166649638.86	4.71813002787993e+27	NA	NA	230073462411.191	267577680104627	73005.625	2999.507	NA	NA	4596853.824	NA	NA	NA	8618.966	NA	NA	NA	NA	NA	NA	NA	NA
St_mix_post	NA	NA	NA	NA	NA	NA	NA	NA	NA	NA	NA	NA	NA	NA	NA	NA	NA	NA	NA	NA	NA	NA	NA	NA	NA	NA	NA	NA	NA	3594.747	NA	NA	NA	NA	NA	NA	NA	NA	NA	NA	NA	NA	NA	NA	NA	NA	NA	NA	NA
St_BA1_post	NA	NA	NA	NA	NA	NA	NA	NA	NA	NA	NA	NA	NA	NA	NA	54134.133	NA	NA	NA	NA	NA	NA	NA	NA	NA	NA	NA	NA	9267.482	NA	NA	NA	NA	NA	NA	NA	NA	NA	NA	NA	NA	NA	NA	NA	NA	NA	NA	NA	NA
St_BA2_post	NA	NA	NA	NA	NA	NA	NA	NA	NA	NA	NA	NA	NA	NA	NA	12416.74	NA	NA	NA	NA	NA	NA	NA	NA	NA	NA	NA	NA	1602577.447	NA	NA	NA	NA	NA	NA	NA	NA	NA	NA	NA	NA	NA	NA	NA	NA	NA	NA	NA	NA
[truncated: 176 more columns]

## Sheet: AreaCorrLog2Cen
Sid	2-hydroxybutyric acid@2.50-sf	2-hydroxyglutaric acid@13.18-gc	2-oxoglutaric acid@13.19-gc	2-oxovaleric acid@14.57-sf	3-hydroxybutyric acid@1.67-sf	3-methylhistidine@0.98-qppos	4-hydroxymandelic acid@15.39-gc	4-hydroxyproline@12.61-gc	5-oxoproline@12.54-gc	Acetic acid@1.79-sf	Acetylcarnitine@1.23-qppos	Acetylcholine@1.06-qppos	Adenine@16.39-gc	Alanine@7.03-gc	Allantoin@1.09-qpneg	Alpha-muricholic acid@6.01-ba	Alpha-tocopherol@29.55-gc	Anthranilic acid@13.61-gc	Arabinose@14.34-gc	Arabitol@14.98-gc	Arachidic acid@23.87-qpneg	Arachidonic acid@20.31-qpneg	Arginine@0.98-qppos	Asparagine@14.30-gc	Aspartic acid@12.54-gc	Behenic acid@25.17-qpneg	Benzoic acid@8.94-gc	Beta-alanine@11.33-gc	Beta-muricholic acid@6.30-ba	Cadaverine@4.75-pa	Capric acid@11.63-gc	Caprylic acid@9.12-gc	Carnitine@1.00-qppos	Carnitine C10:0@12.24-qppos	Carnitine C10:1@11.45-qppos	Carnitine C12:0@14.00-qppos	Carnitine C12:1@10.61-qppos	Carnitine C14:0(OH)@13.73-qppos	Carnitine C14:1@14.74-qppos	Carnitine C14:2@13.95-qppos	Carnitine C16:0@17.32-qppos	Carnitine C16:0(OH)@15.28-qppos	Carnitine C16:1@16.19-qppos	Carnitine C18:0@19.08-qppos	Carnitine C18:1@17.76-qppos	Carnitine C18:2@16.80-qppos	Carnitine C3:0@1.58-qppos	Carnitine C4:0@2.62-qppos	Carnitine C4:0(OH)@1.42-qppos
BlM_pre	-9.283	-19.731	-12.848	1.584	-6.234	-10.164	-14.877	-18.762	-15.151	-2.576	-14.086	NA	-14.07	-17.268	-8.5	-4.907	-4.865	-1.68	-13.867	-15.165	0.262	-7.011	-1.754	-14.24	-19.149	-0.126	-4.751	-20.785	-6.664	0.361	-7.711	-11.035	-12.621	NA	NA	NA	0.686	NA	NA	NA	NA	NA	NA	NA	NA	NA	NA	NA	NA
BlM_post	-9.004	-15.539	-9.226	0.596	-5.925	-8.196	-16.606	-15.403	-15.274	-2.49	-10.486	NA	-9.983	-16.189	-8.165	-5.242	-5.685	1.057	-12.788	-10.642	-0.005	-5.159	-1.829	-14.213	-17.25	-0.131	-6.906	-21.042	-6.893	-0.933	-6.245	-12.153	-9.816	-5.041	NA	NA	0.231	NA	NA	NA	NA	NA	NA	NA	NA	NA	-13.815	-10.942	NA
QC_liver_6a	0.12	NA	NA	0.488	0.121	0.128	NA	NA	NA	0.286	0.468	0.137	NA	NA	-0.029	NA	NA	NA	NA	NA	-0.137	0.066	0.648	NA	NA	-0.354	NA	NA	NA	0.039	NA	NA	0.158	0.287	0.014	0.364	0.439	0.696	0.247	0.842	0.228	0.492	0.255	0.239	0.172	0.259	0.155	0.468	0.385
QC_liver_8a	NA	-0.209	-0.203	NA	NA	NA	-0.186	-0.26	0.153	NA	NA	NA	-0.166	0.077	NA	NA	-0.096	-0.301	-0.147	0.17	NA	NA	NA	-0.765	-0.11	NA	0.307	0.144	NA	NA	-0.062	0.286	NA	NA	NA	NA	NA	NA	NA	NA	NA	NA	NA	NA	NA	NA	NA	NA	NA
QC_liver_7a	NA	NA	NA	NA	NA	NA	NA	NA	NA	NA	NA	NA	NA	NA	NA	0.012	NA	NA	NA	NA	NA	NA	NA	NA	NA	NA	NA	NA	0.943	NA	NA	NA	NA	NA	NA	NA	NA	NA	NA	NA	NA	NA	NA	NA	NA	NA	NA	NA	NA
QC_liver_6b	0.127	NA	NA	-0.007	0.127	0.031	NA	NA	NA	0.281	0.456	-0.017	NA	NA	-0.04	NA	NA	NA	NA	NA	-0.077	0.038	0.492	NA	NA	-0.198	NA	NA	NA	0.115	NA	NA	0.021	0.137	0.165	0.022	-0.075	0.62	0.252	0.578	0.102	0.342	0.083	0.184	0.153	0.09	0.171	0.404	-0.04
QC_liver_8b	NA	0.002	0.042	NA	NA	NA	0.578	-0.681	0.234	NA	NA	NA	-0.163	-1.324	NA	NA	0.127	-0.425	0.133	0.024	NA	NA	NA	-0.148	-0.306	NA	-0.052	-0.91	NA	NA	-0.093	-0.116	NA	NA	NA	NA	NA	NA	NA	NA	NA	NA	NA	NA	NA	NA	NA	NA	NA
QC_liver_7b	NA	NA	NA	NA	NA	NA	NA	NA	NA	NA	NA	NA	NA	NA	NA	0.08	NA	NA	NA	NA	NA	NA	NA	NA	NA	NA	NA	NA	0.963	NA	NA	NA	NA	NA	NA	NA	NA	NA	NA	NA	NA	NA	NA	NA	NA	NA	NA	NA	NA
QC_liver_6c	0.078	NA	NA	0.029	0.078	-0.076	NA	NA	NA	0.233	0.373	-0.061	NA	NA	-0.032	NA	NA	NA	NA	NA	-0.195	-0.117	0.469	NA	NA	0.117	NA	NA	NA	0.012	NA	NA	-0.096	-0.054	0.051	0.215	-0.084	0.317	-0.038	0.638	0.001	0.323	0.047	0.024	0.002	-0.177	-0.011	0.296	0.033
QC_liver_8c	NA	0.186	0.236	NA	NA	NA	0.608	-0.25	0.155	NA	NA	NA	-0.067	0.145	NA	NA	-0.11	0.107	0.37	0.028	NA	NA	NA	-1.135	-0.172	NA	-0.106	-0.247	NA	NA	0.185	-0.002	NA	NA	NA	NA	NA	NA	NA	NA	NA	NA	NA	NA	NA	NA	NA	NA	NA
QC_liver_7c	NA	NA	NA	NA	NA	NA	NA	NA	NA	NA	NA	NA	NA	NA	NA	0.1	NA	NA	NA	NA	NA	NA	NA	NA	NA	NA	NA	NA	0.914	NA	NA	NA	NA	NA	NA	NA	NA	NA	NA	NA	NA	NA	NA	NA	NA	NA	NA	NA	NA
QC_liver_6d	0.128	NA	NA	-0.05	0.109	0.035	NA	NA	NA	0.311	0.496	-0.002	NA	NA	0.046	NA	NA	NA	NA	NA	-0.029	-0.298	0.664	NA	NA	0.022	NA	NA	NA	0.008	NA	NA	-0.035	0.053	-0.574	0.081	-0.098	0.435	0.137	0.231	0.13	0.448	0.08	0.154	0.054	-0.051	0.088	0.435	0.019
QC_liver_9a	NA	0.012	0.033	NA	NA	NA	0.58	-0.484	0.175	NA	NA	NA	-0.122	-0.746	NA	NA	0.227	-0.148	0.324	0.053	NA	NA	NA	-0.339	-0.166	NA	0.026	-0.565	NA	NA	-0.229	0.033	NA	NA	NA	NA	NA	NA	NA	NA	NA	NA	NA	NA	NA	NA	NA	NA	NA
QC_liver_7d	NA	NA	NA	NA	NA	NA	NA	NA	NA	NA	NA	NA	NA	NA	NA	0.017	NA	NA	NA	NA	NA	NA	NA	NA	NA	NA	NA	NA	0.936	NA	NA	NA	NA	NA	NA	NA	NA	NA	NA	NA	NA	NA	NA	NA	NA	NA	NA	NA	NA
QC_liver_6e	0.125	NA	NA	0.301	0.136	-0.035	NA	NA	NA	0.265	0.402	0.021	NA	NA	0.015	NA	NA	NA	NA	NA	-0.071	-0.183	0.453	NA	NA	-0.346	NA	NA	NA	0.004	NA	NA	-0.016	0.042	-0.206	0.269	0.011	0.541	0.136	0.613	0.083	0.32	0.093	0.185	0.08	-0.074	0.195	0.395	0.159
QC_liver_9b	NA	0.092	0.065	NA	NA	NA	0.666	-0.896	0.437	NA	NA	NA	-0.082	-1.867	NA	NA	-0.017	0.026	0.38	0.066	NA	NA	NA	-0.562	-0.423	NA	-0.05	-0.999	NA	NA	-0.138	-0.524	NA	NA	NA	NA	NA	NA	NA	NA	NA	NA	NA	NA	NA	NA	NA	NA	NA
QC_liver_7e	NA	NA	NA	NA	NA	NA	NA	NA	NA	NA	NA	NA	NA	NA	NA	0.029	NA	NA	NA	NA	NA	NA	NA	NA	NA	NA	NA	NA	0.952	NA	NA	NA	NA	NA	NA	NA	NA	NA	NA	NA	NA	NA	NA	NA	NA	NA	NA	NA	NA
QC_liver_8d	NA	0.131	0.075	NA	NA	NA	0.688	-0.042	0.206	NA	NA	NA	0.066	-0.503	NA	NA	0.242	0.436	0.32	0.26	NA	NA	NA	-0.104	0.056	NA	0.238	-0.123	NA	NA	-0.273	-0.025	NA	NA	NA	NA	NA	NA	NA	NA	NA	NA	NA	NA	NA	NA	NA	NA	NA
QC_liver_6f	NA	NA	NA	NA	NA	0.147	NA	NA	NA	NA	0.459	0.003	NA	NA	-0.075	NA	NA	NA	NA	NA	-0.22	0.092	0.704	NA	NA	-0.035	NA	NA	NA	NA	NA	NA	0.083	0.222	0.284	0.079	0.086	0.446	0.102	0.478	0.05	0.514	0.099	0.037	0.099	0.109	-0.013	0.346	0.08
liver-666-FMT_31	-0.047	0.401	-0.546	0.246	-0.099	0.321	1.48	-1.082	0.32	-0.943	2.454	0.655	0.334	-0.021	-0.053	0.339	0.295	0.252	-0.197	-0.529	-0.378	-1.096	0.69	-0.865	-0.722	0.029	-0.21	-1.12	-1.386	-0.078	-0.391	-0.178	0.064	1.374	1.307	0.876	0.439	-0.593	0.944	1.556	1.207	-0.219	0.291	0.896	0.212	0.223	1.686	2.349	0.75
liver-667-FMT-AKK-Pas_32	0.52	0.698	-0.505	0.238	-0.446	0.845	-0.509	0.887	0.213	0.248	0.513	0.679	-0.159	-0.453	0.134	-0.993	0.015	-0.037	-0.177	0.246	-0.381	-0.086	1.271	0.214	-0.02	-0.119	-0.364	0.329	-0.806	0.067	-0.336	-0.196	0.54	0.654	0.073	0.524	0.394	1.715	0.65	0.37	0.513	2.288	1.075	0.198	1.157	0.951	0.485	0.978	0.479
liver-684-SPF_49	0.153	0.148	-0.123	0.264	0.682	0.099	-0.533	0.274	0.249	0.5	-1.607	0.382	0.184	-0.014	-0.323	1.224	0.214	0.943	-0.219	-0.059	-0.283	1.066	0.807	0.239	0.406	0.125	-0.227	0.039	0.329	-0.768	0.189	-0.111	0.37	0.676	-1.158	1.214	0.194	2.713	1.115	1.793	0.3	2.795	0.545	0.298	0.306	1.206	-0.748	-0.49	0.689
liver-668-FMT-AKK_33	-0.687	-0.354	0.708	0.122	0.164	-0.581	-2.216	-0.649	0.239	-0.15	-1.145	-0.469	-0.039	-0.769	0.019	0.044	-0.433	-0.101	0.277	-0.239	-0.34	-0.113	-0.825	-1.101	0.054	-0.024	-0.044	-0.192	-1.038	-0.265	-0.142	-0.255	-0.838	-1.063	-0.341	-1.101	0.487	-0.605	-0.844	-0.853	-0.036	-0.569	-0.11	-0.417	0.045	-0.252	-1.508	-1.587	-0.893
liver-690-ATB_55	-0.469	-0.715	-0.211	0.268	-0.731	-0.587	-2.839	-1.16	-0.123	-0.461	-0.06	-0.55	-0.86	-0.912	-0.133	-2.365	-0.473	-1.437	-0.755	-0.956	2.135	-0.297	-0.313	-0.825	-0.959	1.883	-0.159	-0.297	-0.021	-1.343	-0.138	-0.346	0.123	-0.542	-0.419	-0.318	0.289	0.242	-0.047	-0.596	-0.732	-0.09	-0.476	-0.837	-0.675	-0.343	-0.067	-0.852	-0.548
liver-681-FMT-AKK-Pas_46	0.21	0.76	0.13	-0.051	-0.878	0.271	-2.918	0.318	0.099	-0.133	-0.198	0.374	-0.388	-0.472	-0.131	-0.877	-0.049	0.637	0.549	0.087	0.328	0.279	-0.333	-0.604	-0.097	0.349	-0.208	0.15	-1.055	-0.045	-0.002	0.162	0.118	-0.229	0.314	0.125	-0.143	0.582	0.026	-0.46	-0.203	0.344	0.404	-0.158	0.342	0.223	0.201	0.107	-0.645
liver-670-FMT_35	-0.238	0.115	0.206	-0.006	-0.601	0.484	0.977	-1.006	0.565	0.125	1.73	-0.121	-0.249	-3.19	-0.012	-0.954	-0.48	-0.797	-0.033	-0.468	-0.186	-0.466	-0.5	-0.767	-0.922	0.235	-0.28	-1.508	-0.71	0.219	0.022	-0.03	-0.039	0.004	0.399	-0.387	-0.183	-0.173	-0.579	-1.622	-0.567	-0.392	-0.251	-0.441	-0.168	-0.442	0.057	1.645	0.184
liver-685-SPF_50	0.557	0.199	0.391	-0.201	0.041	0.514	0.366	-0.792	0.398	0.657	0.791	0.429	-0.304	-2.443	0.584	0.819	0.095	0.036	1.239	0.126	0.047	0.201	0.272	-0.619	0.004	0.008	0.105	-1.97	-0.704	-0.329	-0.28	-0.339	0.496	0.785	1.078	0.865	-0.143	1.165	0.974	1.118	0.868	0.734	1.072	0.565	0.88	0.455	0.651	1.138	0.225
liver-675-FMT-AKK_40	0.371	-0.183	-0.339	-0.007	0.246	0.087	1.079	-0.895	0.462	0.122	1.032	0.113	-0.27	-2.122	0.086	-0.683	0.147	-0.189	0.114	0.037	-0.184	-0.573	0.284	-0.834	0.051	0.001	-0.034	-1.514	-1.262	0.005	-0.081	-0.351	0.049	0.075	-0.426	-0.322	-0.108	-0.566	-0.262	-1.489	0.515	0.081	-0.336	0.24	-0.297	-1.068	0.305	0.569	0.249
liver-692-ATB_57	0.251	-0.474	-0.243	-0.169	-0.792	-0.257	0.234	-0.473	-0.293	-0.57	0.216	-0.07	-0.684	-1.445	0.392	-1.218	0.124	-2.178	-0.378	-0.443	-0.056	-1.129	-0.758	-0.695	-0.096	-0.264	-0.042	-0.477	0.461	-0.713	-0.603	-0.327	-0.137	-0.306	0.401	-0.725	-0.113	-1.896	-0.703	0.004	-0.786	-1.697	-0.999	-0.298	-0.534	-0.894	0.538	0.267	-0.963
liver-683-FMT_48	-0.444	-0.208	0.22	-0.196	0.01	-0.241	-3.385	-0.312	0.079	0.389	-1.47	-0.509	-0.309	-0.527	0.311	-0.115	-0.026	0.046	-0.012	-0.181	0.03	-0.369	-0.665	0.109	-0.451	0.054	-0.207	-0.142	-0.805	-0.298	-0.303	-0.281	-0.779	-1.184	-0.957	-1.338	-0.261	-0.001	-1.344	-3.731	-1.464	-0.743	-1.327	-1.119	-1.168	-1.381	-0.528	-1.393	-0.802
liver-689-SPF_54	-0.821	-0.864	0.549	-0.246	1.283	-0.549	0.533	-1.478	0.288	0.257	-2.287	-0.404	0.426	-0.364	-0.056	1.967	0.184	0.186	0.012	-0.386	0.049	0.181	-0.639	-0.588	0.057	-0.027	-0.313	-0.599	1.627	-0.611	0.083	-0.32	-0.697	0.005	-0.574	0.127	-0.235	-0.402	0.293	1.24	-0.002	-0.314	0.412	-0.133	0.433	0.475	-1.353	-2.003	-0.01
liver-680-FMT-AKK_45	0.017	0.108	-0.186	-0.362	0.634	-0.237	0.456	-0.8	0.229	0.66	-0.299	-0.589	0.091	-2.437	0.185	0.37	0.31	-0.385	0.603	0.032	0.194	0.199	-0.795	-0.48	-0.472	0.196	0.062	-0.803	-1.111	-0.419	-0.164	0.568	-0.399	-0.309	-0.848	-0.671	-0.306	-0.45	-0.524	-0.016	0.154	0.145	-0.598	0.046	-0.325	-0.142	-0.279	-0.085	0.006
liver-686-ATB_51	-0.166	-0.956	0.002	-0.191	0.07	-0.197	-1.052	-0.507	-0.4	-0.779	0.106	-0.167	-0.807	-0.198	-0.343	-1.252	-0.66	-1.785	-0.892	-0.263	-0.344	-1.087	-0.592	-1.035	-0.231	-0.132	-0.262	0.117	1.104	-0.74	-0.101	-0.255	-0.278	-0.16	0.24	-0.372	-0.178	-0.428	-0.283	0.516	0.233	-0.669	-0.504	0.559	-0.347	-0.315	0.364	-0.668	-0.12
liver-676-FMT-AKK-Pas_41	0.234	1.252	0.12	-0.366	-0.476	0.367	0.504	0.835	0.074	0.12	1.259	0.281	0.551	0.72	0.012	-0.321	0.132	0.465	0.778	0.507	-0.009	-0.209	0.384	0.02	-0.203	-0.112	-0.036	0.232	-0.008	0.881	-0.009	0.174	0.14	0.142	0.26	-0.218	-0.078	0.528	-0.379	-0.18	-0.498	-0.045	0.308	-0.208	0.219	0.101	0.535	1.005	-0.055
liver-682-FMT_47	-0.422	-0.001	0.016	-0.22	-0.317	0.14	0.739	-0.808	0.082	0.426	0.215	-0.047	0.462	0.109	0.121	0.467	-0.171	0.462	-0.486	-0.155	0.072	0.125	-0.552	0.366	-0.67	0.382	-0.02	-0.41	-0.928	0.752	-0.079	-0.21	-0.059	-0.583	0.02	-0.547	-0.12	-0.325	-0.616	-1.524	0.062	-0.374	-0.279	0.097	-0.128	-0.225	-0.467	0.055	0.046
liver-688-ATB_53	0.554	-0.481	-0.227	-0.232	-0.062	-0.182	0.494	-1.125	-0.166	0.666	-0.403	-0.122	-0.349	0.175	0.136	0.944	0.593	-0.323	-0.37	0.242	-0.094	0.254	-0.509	-0.385	-0.443	-0.062	0.09	0.129	1.302	0.124	-0.438	-0.21	0.379	-0.484	0.085	-0.541	-0.127	0.054	-0.518	-0.678	-0.793	-0.114	-0.205	-0.411	-0.024	0.411	0.161	-0.229	0.196
liver-687-SPF_52	0.269	-0.507	0.849	-0.248	0.976	0.368	0.517	-0.461	0.103	0.48	-1.342	0.004	-0.097	0.497	0.184	0.978	0.305	-1.052	-0.182	0.16	-0.179	0.732	-0.353	0.117	0.955	-0.185	0.129	0.11	0.246	0.464	-0.181	-0.027	0.307	1.232	1.891	1.891	-0.012	2.704	2.029	3.201	0.698	2.699	1.701	0.403	1.22	1.401	-0.108	-0.555	0.107
liver-679-FMT-AKK_44	0.162	0.48	-0.903	-0.077	0.409	-0.336	1.115	-0.908	0.344	-0.645	-0.002	-0.272	0.177	0.113	-0.441	-0.756	0.203	-0.681	0.498	0.079	-0.227	0.707	0.148	-0.014	-0.385	0.105	-0.15	-1.563	-0.84	0.794	0.265	-0.175	-0.145	-0.608	-2.775	-0.689	0.019	-3.816	-0.576	1.092	-0.065	-1.961	-1.575	0.407	-1.032	-0.481	-0.301	-0.637	-0.149
liver-673-FMT-AKK-Pas_38	0.103	0.093	-0.58	-0.03	0.495	0.223	1.091	0.746	0.005	0.19	1.015	0.169	0.471	0.784	0.266	0.936	0.02	-0.296	0.272	0.4	0.049	0.3	0.783	0.501	0.485	-0.157	0.25	0.566	-0.808	1.034	-0.225	0.233	-0.128	-0.024	-0.036	0.197	-0.148	-0.404	-0.089	-0.209	1.042	-0.162	-0.388	0.766	-0.224	-0.597	0.161	0.899	0.457
liver-691-ATB_56	-0.034	-0.09	-0.019	0.062	0.042	-0.135	0.551	1.002	-0.571	0.002	-0.664	-0.123	0.054	1.358	-0.04	0.693	0.424	-0.887	-0.67	0.357	0.155	0.237	0.246	0.947	0.504	0.402	0.021	1.068	4.044	0.403	0.385	0.178	0.577	0.562	1.185	0.992	-0.054	0.92	1.24	2.157	0.269	0.657	1.011	0.25	0.973	1.405	0.635	-0.444	0.789
liver-678-FMT_43	-0.22	-0.054	-0.004	-0.24	-0.753	-0.031	-0.222	1.206	-0.605	-0.222	-0.016	-0.189	0.264	1.567	0.236	1.609	-0.351	1.886	-0.548	-0.139	-0.141	-0.134	0.526	1.575	0.522	-0.806	0.188	1.595	3.182	-0.145	0.363	0.291	-0.123	-0.169	0.553	0.016	-0.055	0.785	-0.144	-1.478	-0.621	0.369	0.061	-0.57	0.114	0.099	0.073	-0.111	-0.21
liver-693-SPF_58	0.081	-0.937	-0.817	0.208	0.465	-0.035	0.51	0.195	-0.019	-0.027	-0.412	-0.272	0.394	1.955	-0.637	-0.559	-0.563	0.777	0.127	-0.044	0.042	0.965	0.53	0.717	0.452	-0.015	-0.308	0.119	-2.021	1.343	0.082	-0.146	0.055	-0.386	-1.29	-0.029	-0.031	-1.402	0.053	0.371	-0.348	-1.293	-0.424	-0.311	-0.32	0.295	-0.962	-0.668	0.273
liver-672-FMT-AKK_37	0.056	0.233	0.046	-0.449	0.039	-0.159	-0.062	1.795	-0.315	-0.09	-0.64	0.196	-0.062	2.032	-0.171	0.044	0.139	0.559	-0.004	0.651	-0.067	0.463	0.258	1.517	0.781	-0.128	0.36	1.519	0.084	0.074	0.379	0.41	-0.019	-0.719	-2.083	-0.425	0.047	-0.325	-0.721	-0.271	-0.246	-0.64	-0.421	-0.232	-0.722	-0.838	-0.572	-0.956	-0.253
liver-671-FMT-AKK-Pas_36	0.314	0.465	0.25	0.59	0.373	-0.016	0.723	0.6	0.117	0.536	0.539	0.613	0.918	0.607	0.018	-0.985	0.392	1.294	0.938	0.696	-0.005	0.117	0.488	0.277	0.226	-0.27	0.439	0.31	-1.328	0.108	0.246	0.447	0.488	0.709	1.624	0.911	0.078	1.533	0.571	1.256	0.3	0.66	0.872	0.431	0.599	0.588	0.891	0.53	0.849
liver-694-ATB_59	-0.247	-0.335	0.057	0.203	-0.199	-0.854	0.457	0.879	-0.943	-0.048	-1.552	-0.508	-0.32	1.971	-0.199	0.086	-0.101	-1.245	-0.938	-0.18	0.085	0.478	-0.396	2.072	0.409	-0.351	0.229	1.397	3.4	-0.397	0.355	0.384	-0.156	-0.543	-1.511	-0.688	0.104	-2.468	-1.239	-3.086	-1.159	-1.724	-0.948	-1.208	-1.105	-0.867	-0.928	-1.54	-0.08
liver-669-FMT_34	-0.275	0.404	0.421	0.068	0.007	0.469	0.412	0.776	0.052	0.019	0.8	0.192	0.293	0.667	0.269	0.504	-0.206	1.461	0.052	0.052	-0.18	-0.114	0.037	0.047	0.097	-0.306	0.308	1.062	1.069	-0.075	0.204	0.233	0.158	0.3	1.355	0.242	0.075	1.16	0.496	1.246	0.106	0.41	0.465	-0.074	0.224	0.312	0.548	0.276	0.069
liver-695-SPF_60	-0.183	0.312	-0.303	0.623	-0.383	-0.139	0.733	1.3	-0.42	-1.147	1.81	0.088	0.206	1.448	-0.547	0.473	-0.204	1.498	0.016	-0.183	-0.239	-0.942	0.205	0.411	0.163	-0.515	0.273	0.975	-1.651	-0.213	0.359	0.313	-0.218	0.858	1.125	0.782	0.12	-0.986	0.706	0.955	1.281	-0.421	0.258	1.256	0.258	-0.13	0.506	2.557	-0.214
liver-674-FMT-AKK_39	0.399	0.492	1.04	0.398	-0.198	0.347	0.764	1.645	-0.062	-0.184	-0.381	0.239	0.074	1.361	0.133	-0.42	0.125	0.891	0.388	0.556	0.108	0.31	0.301	-0.314	0.507	-0.297	0.408	0.876	-0.366	0.173	0.542	0.363	0.151	-0.069	0.509	-0.39	0.048	0.741	-0.231	-0.683	-0.026	0.248	0.367	0.009	0.086	-0.17	0.026	-0.159	-0.425
St_mix_pre	2.823	NA	NA	-3.813	2.015	NA	NA	NA	NA	0.091	NA	NA	NA	NA	NA	NA	NA	NA	NA	NA	NA	NA	NA	NA	NA	NA	NA	NA	NA	39.164	NA	NA	NA	NA	NA	NA	NA	NA	NA	NA	NA	NA	NA	NA	NA	NA	NA	NA	NA
St_BA1_pre	NA	NA	NA	NA	NA	NA	NA	NA	NA	NA	NA	NA	NA	NA	NA	-0.138	NA	NA	NA	NA	NA	NA	NA	NA	NA	NA	NA	NA	-1.47	NA	NA	NA	NA	NA	NA	NA	NA	NA	NA	NA	NA	NA	NA	NA	NA	NA	NA	NA	NA
St_BA2_pre	NA	NA	NA	NA	NA	NA	NA	NA	NA	NA	NA	NA	NA	NA	NA	-0.492	NA	NA	NA	NA	NA	NA	NA	NA	NA	NA	NA	NA	3.784	NA	NA	NA	NA	NA	NA	NA	NA	NA	NA	NA	NA	NA	NA	NA	NA	NA	NA	NA	NA
St_AA_post	NA	-8.56	-0.319	NA	NA	2.462	-10.161	0.208	-6.267	NA	NA	-4.735	-5.462	-5.901	NA	NA	-4.241	-2.586	-4.833	-4.866	0.394	-3.087	3.39	-10.508	-3.911	-1.278	-2.34	-0.45	NA	NA	-0.321	-0.368	NA	NA	NA	NA	6.689	NA	NA	NA	-2.111	NA	NA	NA	NA	NA	-15.665	NA	NA
St_AA_pre	NA	6.032	9.2	NA	NA	4.7	-3.007	74.631	-21.722	NA	NA	-4.452	4.048	100.771	-9.767	NA	-2.921	35.914	-21.237	12.973	-0.805	-5.748	5.572	12.897	28.944	-0.59	16.045	65.129	NA	NA	17.731	27.279	-13.316	-6.794	NA	NA	0.215	NA	NA	NA	-7.658	NA	NA	NA	NA	NA	NA	NA	NA
St_mix_post	NA	NA	NA	NA	NA	NA	NA	NA	NA	NA	NA	NA	NA	NA	NA	NA	NA	NA	NA	NA	NA	NA	NA	NA	NA	NA	NA	NA	NA	-6.699	NA	NA	NA	NA	NA	NA	NA	NA	NA	NA	NA	NA	NA	NA	NA	NA	NA	NA	NA
St_BA1_post	NA	NA	NA	NA	NA	NA	NA	NA	NA	NA	NA	NA	NA	NA	NA	0.732	NA	NA	NA	NA	NA	NA	NA	NA	NA	NA	NA	NA	-3.583	NA	NA	NA	NA	NA	NA	NA	NA	NA	NA	NA	NA	NA	NA	NA	NA	NA	NA	NA	NA
St_BA2_post	NA	NA	NA	NA	NA	NA	NA	NA	NA	NA	NA	NA	NA	NA	NA	-1.392	NA	NA	NA	NA	NA	NA	NA	NA	NA	NA	NA	NA	3.851	NA	NA	NA	NA	NA	NA	NA	NA	NA	NA	NA	NA	NA	NA	NA	NA	NA	NA	NA	NA
[truncated: 176 more columns]

## Sheet: RatioInfos
	Analyte	MetName	AnalyteNum	AnalyteDen
Uridine/UMP	Uridine/UMP	Uridine/UMP	Uridine@1.70-qpneg	UMP@1.38-qpneg
Xanthine/Guanine	Xanthine/Guanine	Xanthine/Guanine	Xanthine@18.56-gc	Guanine@20.34-gc
Xanthine/HXanthine	Xanthine/HXanthine	Xanthine/HXanthine	Xanthine@18.56-gc	Hypoxanthine@15.75-gc
HXanthine/Inosine	HXanthine/Inosine	HXanthine/Inosine	Hypoxanthine@15.75-gc	Inosine@25.09-gc
Uracil/Uridine	Uracil/Uridine	Uracil/Uridine	Uracil@10.20-gc	Uridine@1.70-qpneg
Urate/Xanthine	Urate/Xanthine	Urate/Xanthine	Uric acid@20.03-gc	Xanthine@18.56-gc
Xanthine/Xanthosine	Xanthine/Xanthosine	Xanthine/Xanthosine	Xanthine@18.56-gc	Xanthosine@27.14-gc
FMN/FAD	FMN/FAD	FMN/FAD	FMN@7.72-qpneg	FAD@7.47-qppos
AcCarn/Carn	AcCarn/Carn	AcCarn/Carn	Acetylcarnitine@1.23-qppos	Carnitine@1.00-qppos
Glyc3P/Glycerol	Glyc3P/Glycerol	Glyc3P/Glycerol	Glycerol-3-phosphate@15.40-gc	Glycerol@9.37-gc
Glyc3P/GPCho	Glyc3P/GPCho	Glyc3P/GPCho	Glycerol-3-phosphate@15.40-gc	Glycerophosphorylcholine@1.02-qppos
OPEt/S1P	OPEt/S1P	OPEt/S1P	O-phosphoethanolamine@15.57-gc	Sphingosine-1-phosphate@14.97-qpneg
Stearate/Linolenate	Stearate/Linolenate	Stearate/Linolenate	Stearidonic acid@18.89-qpneg	Linolenic acid@19.59-qpneg
Fum/Suc	Fum/Suc	Fum/Suc	Fumaric acid@10.24-gc	Succinic acid@9.82-gc
Pyr/Lac	Pyr/Lac	Pyr/Lac	Pyruvic acid;Oxaloacetic acid@6.36-gc	Lactic acid@6.49-gc
aHGA/aKG	aHGA/aKG	aHGA/aKG	2-hydroxyglutaric acid@13.18-gc	2-oxoglutaric acid@13.19-gc
PEP/Oaa	PEP/Oaa	PEP/Oaa	Phosphoenolpyruvic acid@13.56-gc	Pyruvic acid;Oxaloacetic acid@6.36-gc
Citrate/Oaa	Citrate/Oaa	Citrate/Oaa	Citric acid;Isocitric acid@15.98-gc	Pyruvic acid;Oxaloacetic acid@6.36-gc
Pyr/PEP	Pyr/PEP	Pyr/PEP	Pyruvic acid;Oxaloacetic acid@6.36-gc	Phosphoenolpyruvic acid@13.56-gc
Pyr/Malate	Pyr/Malate	Pyr/Malate	Pyruvic acid;Oxaloacetic acid@6.36-gc	Malic acid@12.15-gc
Oaa/Malate	Oaa/Malate	Oaa/Malate	Pyruvic acid;Oxaloacetic acid@6.36-gc	Malic acid@12.15-gc
Fum/Malate	Fum/Malate	Fum/Malate	Fumaric acid@10.24-gc	Malic acid@12.15-gc
Xylose/Xylitol	Xylose/Xylitol	Xylose/Xylitol	Xylose@14.27-gc	Xylitol@14.85-gc
Rib5P/Ribose	Rib5P/Ribose	Rib5P/Ribose	Ribose-5-phosphate;Ribulose-5-phosphate@1.05-qpneg	Ribose;Ribulose@14.51-gc
Sucrose/Raffinose	Sucrose/Raffinose	Sucrose/Raffinose	Sucrose@27.03-gc	Raffinose@31.39-gc
Cit/Arg	Cit/Arg	Cit/Arg	Citrulline@15.94-gc	Arginine@0.98-qppos
Tyr/Phe	Tyr/Phe	Tyr/Phe	Tyrosine@17.28-gc	Phenylalanine@13.78-gc
Glu/Gln	Glu/Gln	Glu/Gln	Glutamic acid@13.70-gc	Glutamine@15.44-gc
Orn/Arg	Orn/Arg	Orn/Arg	Ornithine@2.24-pa	Arginine@0.98-qppos
Cit/Orn	Cit/Orn	Cit/Orn	Citrulline@15.94-gc	Ornithine@2.24-pa
Put/Orn	Put/Orn	Put/Orn	Putrescine@4.74-pa	Ornithine@2.24-pa
Kyn/Trp	Kyn/Trp	Kyn/Trp	Kynurenine@21.46-gc	Tryptophan@3.06-qppos
Ser/Gly	Ser/Gly	Ser/Gly	Serine@10.52-gc	Glycine@9.78-gc
Asn/Asp	Asn/Asp	Asn/Asp	Asparagine@14.30-gc	Aspartic acid@12.54-gc
Pyr/Ala	Pyr/Ala	Pyr/Ala	Pyruvic acid;Oxaloacetic acid@6.36-gc	Alanine@7.03-gc
Pyr/Ser	Pyr/Ser	Pyr/Ser	Pyruvic acid;Oxaloacetic acid@6.36-gc	Serine@10.52-gc
aKG/Glu	aKG/Glu	aKG/Glu	2-oxoglutaric acid@13.19-gc	Glutamic acid@13.70-gc
Oaa/Asp	Oaa/Asp	Oaa/Asp	Pyruvic acid;Oxaloacetic acid@6.36-gc	Aspartic acid@12.54-gc
Asp/Malate	Asp/Malate	Asp/Malate	Aspartic acid@12.54-gc	Malic acid@12.15-gc
Urea/Arginine	Urea/Arginine	Urea/Arginine	Urea@8.91-gc	Arginine@0.98-qppos
Serine/PSerine	Serine/PSerine	Serine/PSerine	Serine@10.52-gc	Phosphoserine@0.97-qppos
Carnosine/BetaAla	Carnosine/BetaAla	Carnosine/BetaAla	Carnosine@0.98-qppos	Beta-alanine@11.33-gc
KIC/Leu	KIC/Leu	KIC/Leu	Ketoisocaproic acid@8.53-gc	Leucine@9.31-gc
BetaAla/Asp	BetaAla/Asp	BetaAla/Asp	Beta-alanine@11.33-gc	Aspartic acid@12.54-gc
HOPro/Pro	HOPro/Pro	HOPro/Pro	4-hydroxyproline@12.61-gc	Proline@9.65-gc
Anthr/Kyn	Anthr/Kyn	Anthr/Kyn	Anthranilic acid@13.61-gc	Kynurenine@21.46-gc
GABA/Glu	GABA/Glu	GABA/Glu	GABA@12.62-gc	Glutamic acid@13.70-gc
Spmd/Put	Spmd/Put	Spmd/Put	Spermidine@6.69-pa	Putrescine@4.74-pa
Spr/Spmd	Spr/Spmd	Spr/Spmd	Spermine@7.48-pa	Spermidine@6.69-pa
AcPut/Put	AcPut/Put	AcPut/Put	N-acetylputrescine@15.16-gc	Putrescine@4.74-pa
SAM/Met	SAM/Met	SAM/Met	S-adenosylmethionine@1.35-qppos	Methionine@12.49-gc
GSH/GSSG	GSH/GSSG	GSH/GSSG	Glutathione@1.30-qppos	Ox. glutathione@1.43-qppos
Glu/Oxoproline	Glu/Oxoproline	Glu/Oxoproline	Glutamic acid@13.70-gc	5-oxoproline@12.54-gc
AcSpmd/Spmd	AcSpmd/Spmd	AcSpmd/Spmd	N1-acetylspermidine@5.38-pa	Spermidine@6.69-pa
AcSpmd/Spmd_1	AcSpmd/Spmd_1	AcSpmd/Spmd	N8-acetylspermidine@5.57-pa	Spermidine@6.69-pa
AcSpr/Spr	AcSpr/Spr	AcSpr/Spr	N1-acetylspermine@6.78-pa	Spermine@7.48-pa

## Sheet: Ratio
	Uridine.UMP	Xanthine.Guanine	Xanthine.HXanthine	HXanthine.Inosine	Uracil.Uridine	Urate.Xanthine	Xanthine.Xanthosine	FMN.FAD	AcCarn.Carn	Glyc3P.Glycerol	Glyc3P.GPCho	OPEt.S1P	Stearate.Linolenate	Fum.Suc	Pyr.Lac	aHGA.aKG	PEP.Oaa	Citrate.Oaa	Pyr.PEP	Pyr.Malate	Oaa.Malate	Fum.Malate	Xylose.Xylitol	Rib5P.Ribose	Sucrose.Raffinose	Cit.Arg	Tyr.Phe	Glu.Gln	Orn.Arg	Cit.Orn	Put.Orn	Kyn.Trp	Ser.Gly	Asn.Asp	Pyr.Ala	Pyr.Ser	aKG.Glu	Oaa.Asp	Asp.Malate	Urea.Arginine	Serine.PSerine	Carnosine.BetaAla	KIC.Leu	BetaAla.Asp	HOPro.Pro	Anthr.Kyn	GABA.Glu	Spmd.Put	Spr.Spmd
liver-666-FMT_31	0.174085	640.189	0.861662	4.8267	0.00727173	0.576478	155.782	0.554839	1.00554	1.37112	0.0796366	851.097	0.0545378	2.41749	0.00649008	59.1032	0.0195774	2.33649	51.0793	0.0665768	0.0665768	1.40504	0.227589	7.00129	0.493668	0.0171668	0.27455	108.421	0.622143	0.027593	2.17573	0.00024495	0.062484	0.0150798	0.00531862	0.397968	0.00275448	0.104176	0.63908	187.394	8.92993	0.0147618	0.00128861	2.02203	0.231332	0.551405	0.01858	49.7363	0.962563
liver-667-FMT-AKK-Pas_32	0.347659	860.671	0.837495	11.0689	0.0067246	0.109645	408.195	0.669632	0.188724	0.215037	0.0638839	541.768	0.0718843	5.36852	0.00833859	70.7387	0.00195587	4.38132	511.282	0.0722401	0.0722401	1.48633	0.259607	2.4251	0.204423	0.0286663	0.210183	101.662	0.563768	0.0508477	2.61434	0.000278934	0.155675	0.0193729	0.0081275	0.169026	0.000936313	0.081804	0.883088	117.228	19.0685	0.0292391	0.00128028	3.57401	0.188264	0.336982	0.0233002	34.8258	0.852174
liver-684-SPF_49	0.426073	683.944	0.599092	15.8359	0.00983173	0.0532355	462.029	0.497508	0.0488645	0.212233	0.0710214	369.657	0.0745947	5.33705	0.004026	37.1304	0.00528678	5.03043	189.151	0.0537928	0.0537928	1.52539	0.379427	1.95862	0.0892895	0.0715115	0.188117	36.9437	0.959424	0.0745359	1.25378	0.000313397	0.15905	0.0145438	0.00434283	0.188351	0.000933741	0.0484631	1.10998	201.096	15.2435	0.00939806	5.18924e-05	2.26626	1.24029	0.61777	0.0155786	56.1051	0.939435
liver-668-FMT-AKK_33	0.372163	878.204	0.74884	13.9325	0.00523238	0.0573153	544.723	0.5671	0.155688	0.0969143	0.042517	234.931	0.0544363	12.7036	0.00766903	14.7554	0.0112977	1.09232	88.5134	0.084931	0.084931	1.84825	0.423512	3.1898	0.966804	0.151658	0.183132	9.96656	1.83466	0.0826628	2.63165	0.000428164	0.130977	0.00728466	0.00795463	0.339439	0.00181062	0.0723482	1.17392	555.149	26.04	0.000742106	0.000942375	2.54545	1.30743	0.338986	0.0105373	39.8303	0.928124
liver-690-ATB_55	0.3462	1211.86	0.68035	14.0442	0.00566203	0.107762	284.671	0.526745	0.169671	0.105153	0.0115148	72.4176	0.0743048	5.27233	0.00580202	21.7463	0.0442976	1.64016	22.5746	0.0920113	0.0920113	1.50166	0.0850149	5.02083	0.256818	0.0663302	0.192874	4.3214	1.23544	0.0536894	1.69407	0.000355345	0.145311	0.0177266	0.00615963	0.290782	0.0018184	0.108012	0.851861	344.237	29.7728	0.00263615	0.000594203	4.88838	2.19839	0.215709	0.0220681	51.4876	0.992654
liver-681-FMT-AKK-Pas_46	0.355607	644.034	0.831122	11.5388	0.00527785	0.0514909	424.169	0.617354	0.154779	0.0477822	0.0148841	164.911	0.0607712	9.29191	0.00573961	47.733	0.00430371	1.37406	232.358	0.0758161	0.0758161	1.98127	0.599417	3.02615	0.250254	0.154308	0.274745	23.6865	2.14484	0.0719439	1.617	0.00048408	0.131639	0.0113284	0.00557208	0.272925	0.00148084	0.0755792	1.00313	407.39	22.8973	0.00244041	0.000426385	3.72309	1.59579	0.441954	0.028653	42.5881	0.865448
liver-670-FMT_35	0.242951	684.902	0.816062	9.55082	0.00499247	0.0573568	444.528	0.624186	0.656489	0.796279	0.184147	1433.75	0.0740357	4.47185	0.00641306	28.9585	0.020895	2.28714	47.8583	0.07625	0.07625	1.60942	0.221652	2.82911	0.0894991	0.0526558	0.296504	193.546	2.08304	0.0252784	3.29122	0.000429839	0.132735	0.017895	0.0233631	0.156232	0.00478493	0.0867855	0.878603	434.132	15.5216	0.00713366	0.000179188	2.10579	0.157421	0.207786	0.0183439	24.2172	0.908382
liver-685-SPF_50	0.255486	1033.06	0.84141	8.40814	0.00611618	0.0869452	568.591	0.543488	0.236343	0.636818	0.122447	755.897	0.0794482	11.1573	0.00780066	27.0031	0.0215817	6.26583	46.3355	0.0481625	0.0481625	1.95726	0.797254	3.27549	0.179033	0.0327095	0.320603	138.157	1.23319	0.0265242	1.4541	0.000323692	0.0973808	0.0104452	0.0185853	0.277268	0.00348663	0.0602548	0.799315	274.662	6.04076	0.0114439	0.000265345	0.800489	0.169811	0.326839	0.0131406	58.34	0.88166
liver-675-FMT-AKK_40	0.285037	214.128	0.154342	9.73719	0.00395782	1.91523	27.0536	0.55781	0.38039	0.729957	0.18996	1509.68	0.0602309	4.3963	0.00444266	34.3523	0.0430628	3.73718	23.2219	0.0315361	0.0315361	1.62114	0.265531	4.18225	0.127973	0.0291022	0.207006	52.0585	0.821765	0.0354143	3.09349	0.000286867	0.108265	0.00873548	0.00860654	0.178722	0.00112461	0.0328858	0.958958	267.115	8.48476	0.00742164	0.00037739	1.05102	0.121368	0.359997	0.00710541	38.7072	0.921971
liver-692-ATB_57	0.307593	909.62	0.72416	7.96942	0.00468562	0.159	229.912	0.502024	0.24575	0.579858	0.0968731	1119.02	0.0549757	5.14636	0.00831082	26.2628	0.027817	1.46538	35.9492	0.0606236	0.0606236	1.8326	0.0986707	4.31352	0.265738	0.0787221	0.464485	2.97251	2.40469	0.0327368	0.842644	0.000672899	0.179861	0.0106822	0.0103175	0.173576	0.00133304	0.0670675	0.903919	482.002	21.3681	0.00357015	0.000515072	2.34779	0.229563	0.0472764	0.015343	80.0747	1.00294
liver-683-FMT_48	0.411457	907.534	0.858404	12.7568	0.00562644	0.0343005	305.311	0.623316	0.119108	0.037903	0.0109859	356.034	0.0646809	18.9173	0.00829978	22.8812	0.0140857	2.30516	70.9938	0.0808835	0.0808835	1.89113	0.266465	3.05171	0.209588	0.141923	0.262106	2.04904	2.19896	0.064541	2.06257	0.000476673	0.173009	0.0239629	0.00629398	0.215937	0.00145977	0.0942093	0.858551	406.787	39.4321	0.0030649	0.00084162	3.70887	0.21466	0.371713	0.0173661	38.0172	0.900182
liver-689-SPF_54	0.456734	1083.76	0.728653	19.4014	0.00557226	0.0462385	525.26	0.563405	0.0637951	0.447545	0.184882	2611.66	0.0596662	6.04533	0.00482996	11.552	0.0100506	1.28261	99.4966	0.0869625	0.0869625	1.72908	0.271852	1.88275	0.0630837	0.0954729	0.42998	10.3688	1.91775	0.0497837	1.29748	0.000419115	0.0721525	0.0104466	0.00529896	0.581525	0.00171295	0.0588451	1.47782	517.097	6.15003	0.00411722	0.000648676	1.85092	0.468858	0.365406	0.00600584	62.0756	1.09741
liver-680-FMT-AKK_45	0.362274	721.395	0.947117	12.6782	0.00527267	0.0575411	235.889	0.655011	0.20571	0.405615	0.192733	1078.24	0.0510679	14.5652	0.00816593	37.6635	0.0242343	1.28159	41.2638	0.0692806	0.0692806	1.99228	0.290882	2.75051	0.0735653	0.0781575	0.343164	36.4304	2.64047	0.0295999	1.8629	0.000721029	0.133885	0.016348	0.0257649	0.209423	0.00201642	0.0915767	0.75653	479.1	18.8336	0.00626037	0.000599734	2.25105	0.106004	0.135665	0.012187	39.9387	0.928694
liver-686-ATB_51	0.306257	802.157	0.68674	10.0133	0.00744511	0.325026	171.921	0.607921	0.250136	0.252792	0.0475505	288.124	0.0629848	4.79233	0.00611271	15.8009	0.0402198	2.67268	24.8634	0.0656447	0.0656447	1.54605	0.0666908	4.39877	0.302313	0.0859975	0.264171	1.08167	1.29562	0.0663757	2.05521	0.000488173	0.0872711	0.00947941	0.00559043	0.525048	0.00142748	0.0736781	0.890967	429.937	13.4917	0.00175257	7.90343e-05	3.48889	2.19243	0.105995	0.0132008	52.4707	0.987828
liver-676-FMT-AKK-Pas_41	0.297707	880.377	0.734963	13.4977	0.00633384	0.0986355	438.039	0.634071	0.415197	0.548923	0.137139	1878.46	0.0777613	7.51096	0.00292051	67.0499	0.0249088	7.33024	40.1464	0.0643637	0.0643637	1.83257	0.406241	2.82404	0.372411	0.0615315	0.253173	6.34892	0.988717	0.0622337	1.7911	0.000254361	0.0324273	0.0196031	0.00392538	1.01867	0.00131735	0.0811471	0.793172	283.431	3.76723	0.00672807	0.000399597	3.44817	1.45909	0.49321	0.0208464	51.1552	0.896947
liver-682-FMT_47	0.441831	751.583	0.966735	19.1463	0.00633563	0.0649707	382.369	0.623933	0.230903	0.506094	0.109448	1466.59	0.0512511	5.84089	0.00890897	30.1807	0.0110709	1.1655	90.3269	0.0994209	0.0994209	1.94809	0.196012	2.71123	0.168401	0.0483736	0.346392	40.4258	1.53695	0.0314738	2.65457	0.000377137	0.119534	0.0346981	0.00811785	0.389769	0.00164133	0.139058	0.714959	415.617	13.9194	0.00260322	0.00203857	2.94167	0.121306	0.449986	0.0139546	41.4457	0.8857
liver-688-ATB_53	0.393054	769.215	0.878791	14.3512	0.00319295	0.0561152	393.239	0.491042	0.110803	0.362205	0.079442	1666.65	0.0459008	8.29653	0.00508787	25.5853	0.00836616	1.98662	119.529	0.0676237	0.0676237	1.83627	0.0525353	2.74011	0.141619	0.0345534	0.413714	22.1729	2.33316	0.0148097	1.01696	0.000546892	0.131778	0.017758	0.00580924	0.165285	0.00124177	0.0816826	0.827884	310.433	13.2487	0.00378246	0.00361095	3.51746	0.0645545	0.136302	0.0236953	62.9577	1.02694
liver-687-SPF_52	0.335403	1052.76	0.703166	15.2768	0.0039164	0.0466602	755.773	0.537319	0.0607169	0.416873	0.13865	1277.23	0.0559777	12.6522	0.0071008	11.8997	0.0125678	2.67206	79.5687	0.0544831	0.0544831	1.94746	0.280387	2.4286	0.071725	0.0397069	0.402166	49.77	1.48252	0.0267833	1.66535	0.00034479	0.127557	0.00962024	0.00695821	0.214157	0.00137965	0.0425084	1.2817	326.53	5.98883	0.007988	0.0015398	1.26839	0.0966844	0.109513	0.0055403	59.3922	0.928864
liver-679-FMT-AKK_44	0.283066	693.055	0.937172	11.808	0.00412813	0.225731	287.873	0.536441	0.209908	0.768634	0.216469	1688.19	0.0431367	2.75014	0.00320352	79.2737	0.0111387	1.77987	89.7769	0.0300204	0.0300204	1.32597	0.633236	4.14564	0.527243	0.0316097	0.276002	148.246	0.908026	0.0348115	3.45223	0.000373306	0.0693792	0.0223959	0.00387786	0.198102	0.00771085	0.0421655	0.711966	254.503	8.06084	0.0239743	0.000209963	0.969722	0.112972	0.140015	0.02132	34.393	0.9013
liver-673-FMT-AKK-Pas_38	0.247448	783.997	0.946911	12.7063	0.00508991	0.237339	211.267	0.57503	0.419227	0.614535	0.201722	1303.35	0.0558178	6.95699	0.00482444	48.4207	0.0160606	1.70072	62.264	0.0471679	0.0471679	1.34384	0.312933	4.82749	0.453046	0.0330874	0.256342	14.9242	0.691625	0.04784	6.26379	0.00042077	0.139791	0.0176466	0.00609837	0.137363	0.00066359	0.0532321	0.886079	160.693	14.2042	0.00485389	0.00280008	2.24059	0.133859	0.148917	0.0133995	17.4503	0.802277
liver-691-ATB_56	0.348124	1045.8	0.702197	18.323	0.00436562	0.127535	217.937	0.492876	0.0801712	0.541818	0.074518	790.362	0.0426346	7.23436	0.00491983	28.8556	0.00848979	0.908714	117.789	0.0519443	0.0519443	1.81334	0.0714579	4.33468	0.134513	0.120485	0.362664	0.90729	1.18711	0.101494	1.31865	0.000630784	0.143213	0.0238701	0.00517826	0.23699	0.00100834	0.0616183	0.843002	275.624	13.6252	0.00219699	0.000124046	3.03344	1.29085	0.0759505	0.0192244	53.8693	1.02419
liver-678-FMT_43	0.38258	1184.81	0.655586	20.3034	0.00676538	0.0884288	457.649	0.563849	0.203508	0.395639	0.0608818	1108.91	0.0542536	6.07168	0.0053471	29.2425	0.0165616	3.36475	60.3806	0.0720452	0.0720452	1.57079	0.297572	2.78175	0.158906	0.158153	0.376932	0.821955	1.19948	0.131851	1.65559	0.000291024	0.184908	0.0368829	0.00595256	0.23449	0.0011733	0.071066	1.01378	228.938	30.6091	0.00211622	0.000399439	4.08189	0.966048	1.00194	0.0496071	37.5856	0.890078
liver-693-SPF_58	0.288811	655.039	0.741561	14.349	0.00598409	0.147057	382.881	0.485502	0.136392	0.511467	0.134683	927.077	0.0473841	4.20592	0.00221691	27.7907	0.0136153	1.85427	73.447	0.0220176	0.0220176	1.34906	0.960413	4.61918	0.224214	0.0213933	0.324563	43.7954	0.762836	0.0280445	2.11247	0.000376346	0.0959635	0.0215399	0.0016983	0.180367	0.000682185	0.0253859	0.867316	170.09	7.78483	0.00410206	0.000576	1.48073	0.448098	0.383703	0.00578046	44.548	0.967584
liver-672-FMT-AKK_37	0.339356	1158.35	0.713069	14.6109	0.00642298	0.143429	268.793	0.544368	0.122123	0.308777	0.11258	765.271	0.0546446	7.05315	0.0055834	34.3699	0.0221639	1.74574	45.1184	0.0595573	0.0595573	1.39912	0.323109	4.3505	0.0909078	0.188182	0.27748	1.01918	1.13929	0.165175	1.54433	0.000729555	0.179035	0.0299181	0.00434327	0.144885	0.000891245	0.0530947	1.12172	270.931	30.3997	0.00228977	0.000492277	3.07444	0.271961	0.18887	0.0135388	51.3106	0.911974
liver-671-FMT-AKK-Pas_36	0.317826	774.947	0.827763	13.667	0.00690939	0.0968057	384.741	0.491872	0.194801	0.582653	0.107187	2718.23	0.0416064	6.0198	0.00776365	35.1619	0.0142843	1.76367	70.0068	0.0590959	0.0590959	1.58421	0.481669	2.21282	0.123937	0.028979	0.272551	26.5594	0.827841	0.0350055	2.11757	0.000524546	0.123325	0.0182961	0.0111096	0.233272	0.00158881	0.0896109	0.659472	228.906	11.655	0.00918204	0.00171335	2.11766	0.20328	0.342974	0.0133369	45.8157	0.913314
liver-694-ATB_59	0.657993	1238.42	0.625643	40.023	0.00522171	0.0852747	228.258	0.46378	0.0712736	0.423474	0.0872582	2230.25	0.0230103	5.21752	0.00599554	23.0015	0.0125345	0.838865	79.7795	0.0581909	0.0581909	1.37142	0.0733458	4.21986	0.162962	0.165219	0.407413	0.883765	1.94005	0.0851622	0.75801	0.000782876	0.139111	0.0569646	0.00467137	0.257545	0.00116161	0.0699196	0.832255	375.702	25.5838	0.00163274	0.000239962	3.63364	0.351133	0.0568054	0.0236643	76.0042	1.02331
liver-669-FMT_34	0.250913	1407.26	0.750325	11.3947	0.0094133	0.0797535	459.517	0.510288	0.293561	0.527966	0.0718662	993.677	0.0490883	7.91072	0.00539606	30.1242	0.0110836	1.9228	90.2236	0.0690932	0.0690932	1.66697	0.499743	3.75501	0.0860604	0.176726	0.381845	1.16527	1.2324	0.1434	2.09316	0.000616489	0.0845137	0.0165013	0.00596271	0.459556	0.00111941	0.0794253	0.869914	354.471	6.99885	0.00101745	0.000635117	4.57715	1.89389	0.548818	0.0155128	40.564	0.888672
liver-695-SPF_60	0.14823	1074.79	0.58647	5.33754	0.0132645	0.414175	405.347	0.478335	0.764794	1.20245	0.125976	1009.69	0.0492953	2.58129	0.00551128	46.4746	0.0154153	1.99444	64.8705	0.0708417	0.0708417	1.57397	0.456137	7.27577	0.521303	0.125842	0.344958	1.44091	0.902703	0.139406	1.23442	0.000348578	0.0880642	0.0207757	0.00494286	0.434984	0.000801092	0.0826103	0.857541	281.676	9.07312	0.00237425	0.000234141	3.66576	2.57565	0.826248	0.0125239	73.9295	0.971969
liver-674-FMT-AKK_39	0.361537	2004.88	0.797275	15.7221	0.00843617	0.169209	202.581	0.543078	0.129774	0.443319	0.177771	2363.77	0.0611161	6.33877	0.00564717	20.7981	0.0318929	2.72851	31.355	0.0924221	0.0924221	1.7686	0.304697	2.03949	0.18281	0.0678206	0.282869	2.66053	1.1235	0.0603653	1.41971	0.00046583	0.0335554	0.00980394	0.00769604	1.99805	0.00214974	0.107902	0.856539	309.506	3.44616	0.0134325	0.000725321	2.84485	2.01912	0.364334	0.014519	56.7416	0.895825
[truncated: 7 more columns]

## Sheet: RatioLog2Cen
	Uridine.UMP	Xanthine.Guanine	Xanthine.HXanthine	HXanthine.Inosine	Uracil.Uridine	Urate.Xanthine	Xanthine.Xanthosine	FMN.FAD	AcCarn.Carn	Glyc3P.Glycerol	Glyc3P.GPCho	OPEt.S1P	Stearate.Linolenate	Fum.Suc	Pyr.Lac	aHGA.aKG	PEP.Oaa	Citrate.Oaa	Pyr.PEP	Pyr.Malate	Oaa.Malate	Fum.Malate	Xylose.Xylitol	Rib5P.Ribose	Sucrose.Raffinose	Cit.Arg	Tyr.Phe	Glu.Gln	Orn.Arg	Cit.Orn	Put.Orn	Kyn.Trp	Ser.Gly	Asn.Asp	Pyr.Ala	Pyr.Ser	aKG.Glu	Oaa.Asp	Asp.Malate	Urea.Arginine	Serine.PSerine	Carnosine.BetaAla	KIC.Leu	BetaAla.Asp	HOPro.Pro	Anthr.Kyn	GABA.Glu	Spmd.Put	Spr.Spmd
liver-666-FMT_31	-0.892842	-0.438143	0.244147	-1.40748	0.299013	2.33514	-0.999495	0.00807658	2.39889	1.86155	-0.120233	-0.0567751	-0.0224653	-1.39072	0.19177	0.951129	0.41434	0.156034	-0.41434	0.106893	0.106893	-0.232055	-0.196592	1.04567	1.38789	-1.93141	-0.113829	3.26699	-1.02745	-0.903963	0.241634	-0.797336	-0.820912	-0.161592	-0.325383	0.511952	0.887793	0.587743	-0.48085	-0.690309	-0.52646	1.72109	1.29263	-0.306044	-0.838942	1.0872	0.302991	0.0943472	0.0458988
liver-667-FMT-AKK-Pas_32	0.105037	-0.0111796	0.203105	-0.210073	0.186163	-0.0592865	0.390231	0.279376	-0.0147348	-0.811158	-0.438213	-0.708424	0.375953	-0.239709	0.553338	1.21039	-2.90897	1.06305	2.90897	0.224674	0.224674	-0.150905	-0.00669044	-0.483913	0.115906	-1.19168	-0.499247	3.17411	-1.16959	-0.0220844	0.506584	-0.609902	0.496069	0.199827	0.286378	-0.723453	-0.668924	0.238962	-0.0142883	-1.36706	0.568012	2.70712	1.28327	0.515697	-1.13615	0.376765	0.629586	-0.419797	-0.129834
liver-684-SPF_49	0.398466	-0.342764	-0.280198	0.306615	0.734159	-1.10167	0.568957	-0.149272	-1.96415	-0.830094	-0.285411	-1.25991	0.42935	-0.24819	-0.497118	0.280492	-1.47439	1.26237	1.47439	-0.200713	-0.200713	-0.113481	0.540801	-0.792121	-1.07909	0.127141	-0.659268	1.71374	-0.402527	0.529667	-0.553581	-0.441833	0.52701	-0.213803	-0.617799	-0.567282	-0.672893	-0.516323	0.31561	-0.588495	0.245013	1.06966	-3.34152	-0.141531	1.5837	1.25116	0.0488103	0.268179	0.0108112
liver-668-FMT-AKK_33	0.203299	0.0179146	0.0416809	0.121868	-0.175818	-0.995136	0.806495	0.0396106	-0.292355	-1.96096	-1.02563	-1.91386	-0.0251552	1.00293	0.432577	-1.05087	-0.378818	-0.940913	0.378818	0.458165	0.458165	0.1635	0.699381	-0.0884903	2.35757	1.21172	-0.698015	-0.176425	0.532749	0.67897	0.516101	0.00833783	0.246842	-1.21128	0.255361	0.282449	0.282496	0.0617493	0.396415	0.876493	1.01755	-2.593	0.841186	0.0260703	1.65975	0.385316	-0.515252	-0.226085	-0.0066643
liver-690-ATB_55	0.0989707	0.48251	-0.0966987	0.133385	-0.0619656	-0.0842785	-0.129733	-0.0668888	-0.168273	-1.84325	-2.91017	-3.61169	0.423732	-0.265791	0.03009	-0.491336	1.59238	-0.354473	-1.59238	0.573684	0.573684	-0.136101	-1.61723	0.565969	0.445098	0.0186306	-0.62324	-1.38202	-0.0377379	0.0563684	-0.119372	-0.260605	0.396674	0.0717009	-0.11359	0.0592366	0.288685	0.639913	-0.0662282	0.187022	1.21081	-0.764266	0.17584	0.967509	2.40947	-0.26682	0.551203	0.144272	0.0903088
liver-681-FMT-AKK-Pas_46	0.137647	-0.429504	0.192084	-0.150091	-0.163337	-1.14974	0.445611	0.162106	-0.300805	-2.9812	-2.53989	-2.42441	0.133664	0.551743	0.0144852	0.642878	-1.7712	-0.609864	1.7712	0.294378	0.294378	0.263765	1.20054	-0.164474	0.407741	1.23671	-0.112803	1.07247	0.758102	0.478605	-0.186543	0.185421	0.254122	-0.574272	-0.258217	-0.032196	-0.00756648	0.124781	0.169597	0.430031	0.831997	-0.875578	-0.302959	0.574654	1.94729	0.767989	0.927926	-0.129502	-0.107535
liver-670-FMT_35	-0.411971	-0.340743	0.165704	-0.422891	-0.243531	-0.994092	0.513248	0.177983	1.78376	1.07753	1.08912	0.695626	0.418499	-0.503361	0.174547	-0.0781218	0.508308	0.125236	-0.508308	0.302611	0.302611	-0.0361197	-0.234722	-0.26161	-1.07571	-0.314442	-0.0028457	4.10301	0.715923	-1.03037	0.838759	0.0139717	0.266077	0.085342	1.80973	-0.837014	1.68451	0.324246	-0.0216346	0.521754	0.271096	0.671943	-1.55364	-0.247487	-1.39428	-0.320813	0.284541	-0.943919	-0.0376826
liver-685-SPF_50	-0.339392	0.252217	0.209833	-0.606728	0.0493447	-0.393949	0.868365	-0.021744	0.309872	0.75514	0.500426	-0.227908	0.520291	0.815688	0.457131	-0.178981	0.554962	1.57919	-0.554962	-0.360215	-0.360215	0.246171	1.61202	-0.0502432	-0.0754239	-1.00133	0.109894	3.61665	-0.0403689	-0.960957	-0.339736	-0.395203	-0.180762	-0.691369	1.47965	-0.00942255	1.22785	-0.202133	-0.158082	-0.138723	-1.09038	1.35381	-0.987246	-1.64289	-1.28498	0.33267	-0.196732	0.324533	-0.0807593
liver-675-FMT-AKK_40	-0.181486	-2.01817	-2.23685	-0.395009	-0.578579	4.06732	-3.52513	0.0157809	0.996467	0.952071	1.13396	0.770074	0.120781	-0.527944	-0.355043	0.168298	1.55159	0.833641	-1.55159	-0.97112	-0.97112	-0.025651	0.02586	0.302322	-0.559813	-1.16991	-0.521225	2.20854	-0.625969	-0.543936	0.749371	-0.569442	-0.027904	-0.949252	0.369	-0.642987	-0.404565	-1.07574	0.104622	-0.178921	-0.600235	0.729039	-0.479061	-1.25005	-1.76951	0.472078	-1.08377	-0.267353	-0.0162604
liver-692-ATB_57	-0.0716109	0.0686228	-0.00666669	-0.68404	-0.335045	0.476897	-0.437946	-0.136236	0.36618	0.619957	0.162431	0.338065	-0.01093	-0.300679	0.548524	-0.219089	0.921116	-0.517031	-0.921116	-0.0282463	-0.0282463	0.151228	-1.40233	0.346911	0.494355	0.265734	0.644735	-1.92184	0.923087	-0.657354	-1.12687	0.660564	0.704412	-0.658996	0.630585	-0.685133	-0.15927	-0.047594	0.0193478	0.672658	0.732278	-0.326717	-0.0303423	-0.0905431	-0.850016	-2.45672	0.0268202	0.781393	0.105184
liver-683-FMT_48	0.348107	0.0653094	0.238681	-0.00532272	-0.0710633	-1.73583	-0.0287463	0.175972	-0.678742	-3.31536	-2.97801	-1.31408	0.223617	1.5774	0.546607	-0.417943	-0.0606145	0.136558	0.0606145	0.38772	0.38772	0.196584	0.0309262	-0.152339	0.151906	1.116	-0.180743	-2.45857	0.794056	0.321948	0.16458	0.163173	0.648378	0.506593	-0.0824621	-0.37009	-0.0282463	0.442662	-0.0549419	0.427894	1.61619	-0.546862	0.678053	0.569133	-0.946852	0.51828	0.205516	-0.293299	-0.0507648
liver-689-SPF_54	0.498718	0.321326	0.00225719	0.599576	-0.0850243	-1.30496	0.754005	0.0301808	-1.57949	0.246291	1.09487	1.5608	0.107191	-0.0684112	-0.234454	-1.40396	-0.547569	-0.709227	0.547569	0.492267	0.492267	0.067341	0.0598007	-0.849115	-1.58031	0.544057	0.533375	-0.119339	0.59665	-0.0525931	-0.504149	-0.0224797	-0.613348	-0.691172	-0.330725	1.05914	0.202494	-0.236285	0.728552	0.774055	-1.06452	-0.121031	0.302382	-0.433608	0.180245	0.493593	-1.32632	0.414074	0.235048
liver-680-FMT-AKK_45	0.164444	-0.265853	0.380568	-0.0142355	-0.164751	-0.989463	-0.400918	0.247527	0.109603	0.10437	1.15486	0.284512	-0.117307	1.20023	0.523151	0.301061	0.7222	-0.710375	-0.7222	0.164325	0.164325	0.271755	0.157413	-0.302254	-1.35855	0.25535	0.208001	1.69355	1.05803	-0.802677	0.0176821	0.760233	0.278521	-0.0451006	1.9509	-0.41428	0.437807	0.401773	-0.237448	0.663946	0.550128	0.483547	0.189208	-0.151251	-1.96479	-0.935857	-0.305421	-0.222165	-0.00577878
liver-686-ATB_51	-0.0778947	-0.112757	-0.083212	-0.354672	0.333008	1.50843	-0.857282	0.13989	0.391702	-0.577791	-0.864204	-1.61941	0.185281	-0.403504	0.105346	-0.952106	1.45306	0.349974	-1.45306	0.0865529	0.0865529	-0.0940799	-1.96746	0.375146	0.680395	0.393261	-0.169425	-3.38026	0.0308741	0.362387	0.159421	0.197568	-0.338894	-0.831343	-0.253474	0.911749	-0.0605141	0.0880274	-0.00147458	0.507743	0.0688894	-1.35323	-2.73456	0.480919	2.40555	-1.29191	-0.190136	0.17156	0.0832787
liver-676-FMT-AKK-Pas_41	-0.118742	0.0214804	0.0146968	0.076125	0.0997947	-0.211949	0.492032	0.200652	1.12279	0.540863	0.6639	1.08538	0.489329	0.244765	-0.960248	1.13313	0.761806	1.80555	-0.761806	0.0581204	0.0581204	0.151202	0.639314	-0.264196	0.981245	-0.0897097	-0.230773	-0.82701	-0.359138	0.269428	-0.0390226	-0.742947	-1.76719	0.216871	-0.7636	1.86791	-0.176348	0.227332	-0.169211	-0.0933817	-1.7716	0.587492	-0.39657	0.463985	1.81809	0.926294	0.469037	0.134927	-0.0559589
liver-682-FMT_47	0.45086	-0.206708	0.410145	0.58048	0.100202	-0.814266	0.295937	0.1774	0.276278	0.423663	0.338511	0.728294	-0.112139	-0.118043	0.648793	-0.0184842	-0.408077	-0.847365	0.408077	0.685423	0.685423	0.239395	-0.412079	-0.323007	-0.163754	-0.436814	0.22151	1.84368	0.277304	-0.714118	0.528613	-0.174736	0.114949	1.04064	0.284663	0.481918	0.140882	1.00441	-0.318986	0.458875	0.113921	-0.782404	1.95437	0.234789	-1.77026	0.793973	-0.110018	-0.168731	-0.0741639
liver-688-ATB_53	0.28209	-0.173255	0.272544	0.164584	-0.888394	-1.02566	0.336379	-0.168147	-0.783015	-0.0589342	-0.123763	0.912782	-0.271203	0.388275	-0.159404	-0.256793	-0.812212	-0.0779924	0.812212	0.129403	0.129403	0.154115	-2.31166	-0.307724	-0.413632	-0.922205	0.477737	0.977207	0.879518	-1.80172	-0.855598	0.361431	0.25564	0.0742586	-0.198084	-0.755747	-0.261589	0.236821	-0.107417	0.0379023	0.0426742	-0.243374	2.77919	0.492688	-2.68032	-0.929106	0.653844	0.434429	0.139299
liver-687-SPF_52	0.0532598	0.279469	-0.0491104	0.254757	-0.593756	-1.29186	1.27893	-0.0382132	-1.65084	0.143866	0.679706	0.528847	0.0151287	0.997083	0.321514	-1.36119	-0.225122	0.349641	0.225122	-0.182318	-0.182318	0.238928	0.104401	-0.481832	-1.3951	-0.721647	0.436895	2.14368	0.225288	-0.946935	-0.144038	-0.304106	0.208676	-0.810067	0.0622816	-0.382031	-0.10969	-0.70546	0.523142	0.110833	-1.10284	0.835134	1.54955	-0.978854	-2.09755	-1.2448	-1.44272	0.35032	-0.00551504
liver-679-FMT-AKK_44	-0.191496	-0.323673	0.365338	-0.116819	-0.517796	0.982477	-0.113596	-0.040574	0.138746	1.02656	1.32243	0.93131	-0.360806	-1.20473	-0.826809	1.37473	-0.399267	-0.23654	0.399267	-1.04218	-1.04218	-0.315615	1.27972	0.28964	1.48282	-1.05067	-0.106219	3.71833	-0.481961	-0.568705	0.907661	-0.189466	-0.669896	0.409024	-0.781173	-0.494461	2.3729	-0.717144	-0.325038	-0.248698	-0.674179	2.42071	-1.32498	-1.3662	-1.87294	-0.890324	0.501452	-0.437838	-0.0489747
liver-673-FMT-AKK-Pas_38	-0.385508	-0.145794	0.380253	-0.0110465	-0.215646	1.05482	-0.559962	0.0596438	1.13672	0.703755	1.22063	0.558057	0.0110034	0.134231	-0.236106	0.663515	0.128679	-0.302166	-0.128679	-0.390322	-0.390322	-0.296307	0.262835	0.509318	1.26401	-0.984754	-0.212828	0.406063	-0.874704	-0.11005	1.76717	-0.0167946	0.340801	0.0651798	-0.12801	-1.0227	-1.16562	-0.380911	-0.00941069	-0.912075	0.14314	0.116441	2.41228	-0.15797	-1.62819	-0.801403	-0.168583	-1.4167	-0.216881
liver-691-ATB_56	0.106966	0.269892	-0.0511008	0.51707	-0.437098	0.158771	-0.515116	-0.162767	-1.24985	0.522067	-0.216077	-0.163586	-0.377699	0.190634	-0.207858	-0.0832562	-0.79105	-1.20641	0.79105	-0.25116	-0.25116	0.135987	-1.86785	0.353972	-0.487902	0.879747	0.287739	-3.63388	-0.0953073	0.975055	-0.480807	0.567321	0.375689	0.500993	-0.363967	-0.235873	-0.562004	-0.16985	-0.0813098	-0.13368	0.0830943	-1.02717	-2.08425	0.279106	1.64134	-1.77278	0.352183	0.209511	0.135423
liver-678-FMT_43	0.243127	0.449937	-0.150192	0.665132	0.194886	-0.369539	0.555215	0.0313153	0.094076	0.0684448	-0.507655	0.324969	-0.0300048	-0.0621375	-0.0877096	-0.0640411	0.172993	0.682188	-0.172993	0.220777	0.220777	-0.0711732	0.190217	-0.285961	-0.247475	1.27221	0.343407	-3.77639	-0.0803533	1.35256	-0.152524	-0.548687	0.744335	1.12874	-0.162923	-0.251174	-0.343421	0.0359511	0.184826	-0.401426	1.25078	-1.08121	-0.397141	0.707388	1.22319	1.94882	1.71979	-0.309775	-0.0670505
liver-693-SPF_58	-0.16251	-0.405061	0.0275906	0.164361	0.0178453	0.364252	0.297868	-0.184516	-0.483252	0.4389	0.637829	0.0665906	-0.225321	-0.591811	-1.35792	-0.137507	-0.109626	-0.177462	0.109626	-1.48947	-1.48947	-0.290711	1.88063	0.44568	0.249225	-1.61387	0.127601	1.95919	-0.733322	-0.880552	0.199064	-0.177766	-0.201913	0.352799	-1.97235	-0.629769	-1.12575	-1.44918	-0.0402889	-0.830085	-0.724443	-0.126353	0.130952	-0.755536	0.114909	0.56408	-1.3815	-0.0645927	0.0534054
liver-672-FMT-AKK_37	0.0701624	0.417355	-0.0289331	0.190457	0.119956	0.328205	-0.212534	-0.0194093	-0.642676	-0.289178	0.379218	-0.210127	-0.0196434	0.154035	-0.0253216	0.169038	0.593363	-0.264468	-0.593363	-0.0538485	-0.0538485	-0.238139	0.309001	0.359225	-1.05317	1.52302	-0.0985122	-3.46611	-0.154633	1.67765	-0.252881	0.777192	0.697773	0.826808	-0.617651	-0.945795	-0.740093	-0.384641	0.330793	-0.158457	1.24088	-0.967497	-0.0956465	0.298477	-0.605509	-0.458512	-0.153662	0.139303	-0.0319886
liver-671-FMT-AKK-Pas_36	-0.0243969	-0.162544	0.186242	0.0941118	0.225272	-0.238964	0.304862	-0.165708	0.0309915	0.626895	0.308394	1.6185	-0.412918	-0.074517	0.450268	0.201905	-0.0404178	-0.249729	0.0404178	-0.0650688	-0.0650688	-0.0588984	0.88502	-0.61607	-0.606039	-1.17603	-0.12437	1.23763	-0.615342	-0.560687	0.202546	0.301245	0.159991	0.117327	0.737304	-0.258688	0.0939584	0.370466	-0.435535	-0.401628	-0.142228	1.03611	1.70363	-0.239379	-1.02544	0.402189	-0.17534	-0.0241123	-0.0298702
liver-694-ATB_59	1.02544	0.513789	-0.217636	1.64424	-0.178763	-0.421938	-0.44836	-0.250553	-1.41957	0.166531	0.0116264	1.33303	-1.26744	-0.280869	0.0774229	-0.410382	-0.22894	-1.3218	0.22894	-0.0873313	-0.0873313	-0.266991	-1.83023	0.31524	-0.211119	1.33527	0.455595	-3.67179	0.613325	0.721946	-1.27958	0.878959	0.333768	1.75585	-0.512588	-0.115876	-0.357864	0.0124883	-0.0998196	0.313207	0.992051	-1.4554	-1.13231	0.539569	-0.236891	-2.19181	0.651952	0.706126	0.134193
liver-669-FMT_34	-0.365446	0.698174	0.0445407	-0.168229	0.671414	-0.518509	0.56109	-0.112682	0.622649	0.484703	-0.268353	0.166679	-0.174344	0.319576	-0.0745604	-0.021185	-0.406427	-0.1251	0.406427	0.160417	0.160417	0.0145616	0.938167	0.146863	-1.13223	1.43241	0.36209	-3.27286	-0.0412954	1.47371	0.185814	0.53425	-0.385213	-0.0316293	-0.160465	0.719539	-0.411245	0.196389	-0.0359727	0.229286	-0.877992	-2.13774	0.271907	0.872601	2.19438	1.08042	0.0427018	-0.199753	-0.0693302
liver-695-SPF_60	-1.1248	0.309346	-0.310919	-1.26234	1.16621	1.85811	0.38013	-0.20597	2.00406	1.67216	0.541408	0.189747	-0.168273	-1.29614	-0.0440779	0.604334	0.0695162	-0.0723278	-0.0695162	0.196473	0.196473	-0.0682521	0.806447	1.10114	1.46647	0.942509	0.215523	-2.96654	-0.490443	1.43295	-0.576029	-0.288345	-0.325842	0.300689	-0.431087	0.64026	-0.893946	0.253114	-0.0566403	-0.102343	-0.50351	-0.91523	-1.16774	0.552263	2.63796	1.67067	-0.266078	0.666197	0.059928
liver-674-FMT-AKK_39	0.161506	1.20881	0.132102	0.29621	0.513302	0.566676	-0.62053	-0.0228324	-0.555014	0.232604	1.03829	1.41692	0.14183	-2.96716e-05	-0.00893816	-0.555657	1.11838	0.379802	-1.11838	0.580112	0.580112	0.0999482	0.224354	-0.73375	-0.0453057	0.0506897	-0.0707604	-2.08181	-0.174761	0.225451	-0.374274	0.129979	-1.71785	-0.782778	0.207683	2.83982	0.530177	0.638439	-0.058327	0.0335853	-1.90012	1.58495	0.463503	0.186505	2.28675	0.489354	-0.052818	0.284454	-0.0577656
[truncated: 7 more columns]
