# Supplementary material for: Oral administration of Akkermansia muciniphila elevates systemic antiaging and anticancer metabolites
Source: Aging (Albany NY). 2021 Mar 2;13(5):6375–405. doi: 10.18632/aging.202739 (PMC7993698; doi:10.18632/aging.202739)
Supplement: Supplementary Table 12 [file aging-13-202739-s013.xlsx]

## Sheet: SampleInfos
Supplementary Table 12. Related to Supplementary Figures 15, 19. Targeted metabolomics analysis from liver samples from mice receiving oral gavages with Akk or Akk-past.
Sid	sType	InjOrder	Grp	Color
BlM_pre	Bl	4	-	-
BlM_prea	Bl	7	-	-
BlM_post	Bl	52	-	-
QC_plasma_4a	QC	6	QC	#737373
QC_plasma_5a	QC	8	QC	#737373
QC_batch-plasma_5a	QC	9	QC	#737373
QC_plasma_4b	QC	17	QC	#737373
QC_plasma_5b	QC	18	QC	#737373
QC_batch-plasma_5b	QC	19	QC	#737373
QC_plasma_4c	QC	27	QC	#737373
QC_batch-plasma_5c	QC	29	QC	#737373
QC_plasma_6a	QC	36	QC	#737373
QC_plasma_4d	QC	37	QC	#737373
QC_batch-plasma_5d	QC	39	QC	#737373
QC_plasma_6b	QC	48	QC	#737373
QC_plasma_4e	QC	49	QC	#737373
QC_plasma_5c	QC	50	QC	#737373
QC_batch-plasma_5e	QC	51	QC	#737373
plasma-666-FMT_1	Sa	10	FMT Plasma	#9E9AC8
plasma-667-FMT-AKK-Pas_2	Sa	11	FMT AKK Pas Plasma	#54278F
plasma-684-SPF_19	Sa	12	SPF Plasma	#74C476
plasma-668-FMT-AKK_3	Sa	13	FMT AKK Plasma	#7960AB
plasma-690-ATB_25	Sa	14	ATB Plasma	#FB6A4A
plasma-681-FMT-AKK-Pas_16	Sa	15	FMT AKK Pas Plasma	#54278F
plasma-670-FMT_5	Sa	16	FMT Plasma	#9E9AC8
plasma-685-SPF_20	Sa	20	SPF Plasma	#74C476
plasma-675-FMT-AKK_10	Sa	21	FMT AKK Plasma	#7960AB
plasma-692-ATB_27	Sa	22	ATB Plasma	#FB6A4A
plasma-683-FMT_18	Sa	23	FMT Plasma	#9E9AC8
plasma-689-SPF_24	Sa	24	SPF Plasma	#74C476
plasma-680-FMT-AKK_15	Sa	25	FMT AKK Plasma	#7960AB
plasma-686-ATB_21	Sa	26	ATB Plasma	#FB6A4A
plasma-676-FMT-AKK-Pas_11	Sa	28	FMT AKK Pas Plasma	#54278F
plasma-682-FMT_17	Sa	30	FMT Plasma	#9E9AC8
plasma-688-ATB_23	Sa	31	ATB Plasma	#FB6A4A
plasma-687-SPF_22	Sa	32	SPF Plasma	#74C476
plasma-679-FMT-AKK_14	Sa	33	FMT AKK Plasma	#7960AB
plasma-673-FMT-AKK-Pas_8	Sa	34	FMT AKK Pas Plasma	#54278F
plasma-691-ATB_26	Sa	35	ATB Plasma	#FB6A4A
plasma-678-FMT_13	Sa	38	FMT Plasma	#9E9AC8
plasma-677-FMT-AKK-Pas_12	Sa	40	FMT AKK Pas Plasma	#54278F
plasma-693-SPF_28	Sa	41	SPF Plasma	#74C476
plasma-672-FMT-AKK_7	Sa	42	FMT AKK Plasma	#7960AB
plasma-694-ATB_29	Sa	43	ATB Plasma	#FB6A4A
plasma-671-FMT-AKK-Pas_6	Sa	44	FMT AKK Pas Plasma	#54278F
plasma-695-SPF_30	Sa	45	SPF Plasma	#74C476
plasma-674-FMT-AKK_9	Sa	46	FMT AKK Plasma	#7960AB
plasma-669-FMT_4	Sa	47	FMT Plasma	#9E9AC8
St_mix_pre	St	1	-	-
St_BA1_pre	St	2	-	-
St_AA_pre	St	3	-	-
St_BA2_pre	St	5	-	-
St_mix_post	St	53	-	-
St_AA_post	St	54	-	-
St_BA1_post	St	55	-	-
St_BA2_post	St	56	-	-

## Sheet: MetabolitesInfos
Analyte	MetName	RT	Class	MF	Mass	HMDB	KEGG	PC	Chebi	OGName	PCu	Method
2-deoxycytidine@1.41-qppos	2-deoxycytidine	1.413	Nucleosides	C9H13N3O4	227.091	HMDB00014	C00881	13711;637	chebiId:15698	2-deoxycytidine	637	qppos
2-hydroxy-2-methylbutyric acid@3.49-sf	2-hydroxy-2-methylbutyric acid	3.487	Fatty Acyls	C5H10O3	118.063	-	-	95433	-	2-hydroxy-2-methylbutyric acid	95433	sf
2-hydroxy-3-methylbutyric acid@4.61-sf	2-hydroxy-3-methylbutyric acid	4.614	Fatty Acyls	C5H10O3	118.063	-	-	5289545	-	2-hydroxy-2-methylbutyric acid	5289545	sf
2-hydroxybutyric acid@2.50-sf	2-hydroxybutyric acid	2.497	Organic acids	C4H8O3	104.047	HMDB00008	C05984	440864;11266	chebiId:1148;chebiId:50613	2-hydroxybutyric acid	11266	sf
2-hydroxyglutaric acid@13.18-gc	2-hydroxyglutaric acid	13.178	Organic acids	C5H8O5	148.037	HMDB00606;HMDB59655	C02630;C01087	43	chebiId:17084	2-hydroxyglutaric acid	43	gc
2-oxoglutaric acid@13.19-gc	2-oxoglutaric acid	13.188	Organic acids	C5H6O5	146.022	HMDB00208	C00026	51	chebiId:30915	2-oxoglutaric acid	51	gc
3-hydroxybutyric acid@1.67-sf	3-hydroxybutyric acid	1.666	Organic acids	C4H8O3	104.047	HMDB00357;HMDB00011	C01089	441;92135	chebiId:10983;chebiId:17066;chebiId:20067	3-hydroxybutyric acid	441	sf
3-hydroxyglutaric acid@1.42-qpneg	3-hydroxyglutaric acid	1.417	-	-	-	-	-	-	-	-	-	qpneg
3-indoxyl sulfuric acid@5.08-qpneg	3-indoxyl sulfuric acid	5.085	Organic acids	C8H7NO4S	213.01	HMDB00682	-	10258	-	3-indoxyl sulfuric acid	10258	qpneg
3-methylglutarylcarnitine*@2.78-qppos	3-methylglutarylcarnitine*	2.781	-	-	-	-	-	-	-	-	-	qppos
3-methylhistidine@0.98-qppos	3-methylhistidine	0.976	Amino acids	C7H11N3O2	169.085	HMDB00479	C01152	64969;565965	chebiId:27596	3-methylhistidine	565965	qppos
3-phenylpropionic acid@10.51-qpneg	3-phenylpropionic acid	10.511	Flavonoids	C9H10O2	150.068	HMDB00764	C05629	107	chebiId:28631	3-phenylpropionic acid	107	qpneg
4-hydroxyproline@12.61-gc	4-hydroxyproline	12.61	Amino acids	C5H9NO3	131.058	HMDB00725	C01157	825;5810;5238478	chebiId:18095	4-hydroxyproline	5238478	gc
5-aminovaleric acid@13.70-gc	5-aminovaleric acid	13.701	Amino acids	C5H11NO2	117.079	HMDB03355	C00431	138;6992101	chebiId:15887	5-aminovaleric acid	138	gc
5-oxoproline@12.54-gc	5-oxoproline	12.542	Amino acids	C5H7NO3	129.043	HMDB00805;HMDB00267	C02237;C01879	439685;499;7405	chebiId:16010;chebiId:16924;chebiId:18183	5-oxoproline	499	gc
Acetic acid@1.79-sf	Acetic acid	1.793	Organic acids	C2H4O2	60.021	HMDB00042	C00033	176;21980959	chebiId:15366	Acetic acid	176	sf
Acetylcarnitine@1.23-qppos	Acetylcarnitine	1.233	Fatty Acyls	C9H17NO4	203.116	HMDB00201	C02571	7045767;439756;1	chebiId:15960;chebiId:57589	Acetylcarnitine	1	qppos
Acetylcholine@1.06-qppos	Acetylcholine	1.058	Unclassified	C7H15NO2	145.11	HMDB00895	C01996	187	chebiId:15355	Acetylcholine	187	qppos
Alanine@7.03-gc	Alanine	7.033	Amino acids	C3H7NO2	89.048	HMDB01310;HMDB00161	C00133;C00041	71080;602;5950;7311724;57383916	chebiId:15570;chebiId:16977	Alanine	57383916	gc
Allantoin@1.09-qpneg	Allantoin	1.094	Organic acids	C4H6N4O3	158.044	HMDB00462	C02350;C01551	204;439714	chebiId:15678	Allantoin	204	qpneg
Alpha-muricholic acid@6.01-ba	Alpha-muricholic acid	6.011	Steroids	C24H40O5	408.288	HMDB00506	C17647	5283852;3083761	chebiId:81243	Alpha-muricholic acid	3083761	ba
Anthranilic acid@13.61-gc	Anthranilic acid	13.606	Unclassified	C7H7NO2	137.048	HMDB01123	C00108	227;3734162	chebiId:30754	Anthranilic acid	227	gc
Arabinose@14.34-gc	Arabinose	14.342	Carbohydrates	C5H10O5	150.053	HMDB00646	C00216;C00259	66308;6902;439195	chebiId:17108;chebiId:46994	Arabinose	439195	gc
Arabitol@14.98-gc	Arabitol	14.983	Carbohydrates	C5H12O5	152.068	HMDB01851;HMDB00568	C00532;C01904	439255;94154	chebiId:18403;chebiId:18333	Arabitol	439255	gc
Arachidonic acid@20.31-qpneg	Arachidonic acid	20.307	Fatty Acyls	C20H32O2	304.24	HMDB01043	C00219	444899;231	chebiId:15843	Arachidonic acid	231	qpneg
Arginine@0.98-qppos	Arginine	0.976	Amino acids	C6H14N4O2	174.112	HMDB03416;HMDB00517	C00792;C00062	71070;6322;59119146;232;5246487	chebiId:15816;chebiId:16467	Arginine	232	qppos
Aspartic acid@12.54-gc	Aspartic acid	12.541	Amino acids	C4H7NO4	133.038	HMDB06483;HMDB00191	C00402;C00049	83887;5960;424;23443619;57397078	chebiId:17364;chebiId:17053	Aspartic acid	23443619	gc
Azelaic acid@9.84-qpneg	Azelaic acid	9.838	-	-	-	-	-	-	-	-	-	qpneg
Behenic acid@25.17-qpneg	Behenic acid	25.172	Fatty Acyls	C22H44O2	340.334	HMDB00944	C08281	8215	chebiId:23858;chebiId:28941	Behenic acid	8215	qpneg
Benzoic acid@9.73-sf	Benzoic acid	9.73	Unclassified	C7H6O2	122.037	HMDB01870	C00180	243;20144841	chebiId:30746	Benzoic acid	20144841	sf
Beta-alanine@11.33-gc	Beta-alanine	11.334	Amino acids	C3H7NO2	89.048	HMDB00056	C00099	239;4755801	chebiId:16958	Beta-alanine	239	gc
Beta-muricholic acid@6.30-ba	Beta-muricholic acid	6.298	Steroids	C24H40O5	408.288	HMDB00415	C17726	5283853;3083762	chebiId:81298	Beta-muricholic acid	3083762	ba
Butanoic acid@5.30-sf	Butanoic acid	5.296	Fatty Acyls	C4H8O2	88.052	HMDB00039	C00246	264	chebiId:30772	Butanoic acid	264	sf
Cadaverine@4.75-pa	Cadaverine	4.749	Unclassified	C5H14N2	102.116	HMDB02322	C01672	273	chebiId:18127	Cadaverine	273	pa
Capric acid@15.84-qpneg	Capric acid	15.838	Fatty Acyls	C10H20O2	172.146	HMDB00511	C01571	2969	chebiId:30813	Capric acid	2969	qpneg
Caproic acid@12.07-sf	Caproic acid	12.069	Fatty Acyls	C6H12O2	116.084	HMDB00535	C01585	8892	chebiId:30776	Caproic acid	8892	sf
Caprylic acid@13.51-qpneg	Caprylic acid	13.512	Fatty Acyls	C8H16O2	144.115	HMDB00482	C06423	379	chebiId:28837	Caprylic acid	379	qpneg
Carnitine@1.00-qppos	Carnitine	0.999	Organic acids	C7H15NO3	161.105	HMDB00062	C00318;C00487;C15025	10917;288;85;2724480	chebiId:16347;chebiId:3424;chebiId:11060	Carnitine	288	qppos
Carnitine C10:0@12.24-qppos	Carnitine C10:0	12.243	Fatty Acyls	C17H33NO4	315.241	HMDB00651	-	10245190	-	Carnitine C10:0	10245190	qppos
Carnitine C10:1@11.45-qppos	Carnitine C10:1	11.449	Fatty Acyls	C17H31NO4	313.225	HMDB13205	-	53481651	-	Carnitine C10:1	53481651	qppos
Carnitine C12:0@14.00-qppos	Carnitine C12:0	14	Fatty Acyls	C19H37NO4	343.272	HMDB02250	-	168381	-	Carnitine C12:0	168381	qppos
Carnitine C12:1@10.61-qppos	Carnitine C12:1	10.612	Fatty Acyls	C19H35NO4	341.257	HMDB13326	-	53481671	-	Carnitine C12:1	53481671	qppos
Carnitine C14:0(OH)@13.73-qppos	Carnitine C14:0(OH)	13.73	Fatty Acyls	C21H41NO5	387.298	HMDB13166;HMDB61640	-	53481642	-	Carnitine C14:0(OH)	53481642	qppos
Carnitine C14:1@14.74-qppos	Carnitine C14:1	14.735	Fatty Acyls	C21H39NO4	369.288	HMDB13329;HMDB02014	-	22833575;53481677	-	Carnitine C14:1	22833575	qppos
Carnitine C14:2@13.95-qppos	Carnitine C14:2	13.947	Fatty Acyls	C21H37NO4	367.272	HMDB13331	-	53481681	-	Carnitine C14:2	53481681	qppos
Carnitine C16:0@17.32-qppos	Carnitine C16:0	17.322	Fatty Acyls	C23H45NO4	399.335	HMDB00222	C02990	461;11953816	chebiId:17490	Carnitine C16:0	461	qppos
Carnitine C16:1@16.19-qppos	Carnitine C16:1	16.189	Fatty Acyls	C23H43NO4	397.319	HMDB13207;HMDB06317	-	53477817;53481653	-	Carnitine C16:1	53477817	qppos
Carnitine C18:0@19.08-qppos	Carnitine C18:0	19.077	Fatty Acyls	C25H49NO4	427.366	HMDB00848	-	6426855	-	Carnitine C18:0	6426855	qppos
Carnitine C18:1@17.76-qppos	Carnitine C18:1	17.759	Fatty Acyls	C25H47NO4	425.351	HMDB05065	-	53477789	-	Carnitine C18:1	53477789	qppos
Carnitine C18:2@16.80-qppos	Carnitine C18:2	16.802	Fatty Acyls	C25H45NO4	423.335	HMDB06469;HMDB06461	-	6450015;53477834	-	Carnitine C18:2	53477834	qppos
Carnitine C3:0@1.58-qppos	Carnitine C3:0	1.584	Fatty Acyls	C10H19NO4	217.131	HMDB00824	C03017	107738	chebiId:28867	Carnitine C3:0	107738	qppos
Carnitine C4:0@2.62-qppos	Carnitine C4:0	2.622	Fatty Acyls	C11H21NO4	231.147	HMDB00736	-	10177002;439829	-	Carnitine C4:0	10177002	qppos
Carnitine C4:0(OH)@1.42-qppos	Carnitine C4:0(OH)	1.421	Fatty Acyls	C11H21NO5	247.142	HMDB13127	-	53481617	-	Carnitine C4:0(OH)	53481617	qppos
Carnitine C5:0@5.23-qppos	Carnitine C5:0	5.234	Fatty Acyls	C12H23NO4	245.163	HMDB00688	-	6426851	-	Carnitine C5:0	6426851	qppos
Carnitine C6:0@7.53-qppos	Carnitine C6:0	7.525	Fatty Acyls	C13H25NO4	259.178	HMDB00705	-	6426853;3246938	-	Carnitine C6:0	6426853	qppos
Carnitine C8:0@10.22-qppos	Carnitine C8:0	10.219	Fatty Acyls	C15H29NO4	287.21	HMDB00791	C02838	11953814	chebiId:18102	Carnitine C8:0	11953814	qppos
Carnitine C8:1@9.17-qppos	Carnitine C8:1	9.167	Fatty Acyls	C15H27NO4	285.194	HMDB13324	-	53481667	-	Carnitine C8:1	53481667	qppos
Chenodeoxycholic acid@10.29-ba	Chenodeoxycholic acid	10.29	Steroids	C24H40O4	392.293	HMDB00518	C02528	10133	chebiId:16755	Chenodeoxycholic acid	10133	ba
Cholesterol@29.67-gc	Cholesterol	29.673	Steroids	C27H46O	386.355	HMDB00067	C00187	6432564;5997	chebiId:16113	Cholesterol	5997	gc
Cholic acid@9.16-ba	Cholic acid	9.158	Steroids	C24H40O5	408.288	HMDB00619	C00695;C01558	221493;303;439520	chebiId:16359;chebiId:22868;chebiId:3098	Cholic acid	303	ba
Choline phosphate@1.00-qppos	Choline phosphate	0.997	Unclassified	C5H14NO4P	183.066	HMDB01565	C00588	135437;1014	chebiId:18132	Choline phosphate	135437	qppos
Citric acid;Isocitric acid@15.98-gc	Citric acid;Isocitric acid	15.98	Organic acids	C6H8O7	192.027	HMDB00094;HMDB00193	C00158;C00311	311;19782904;88113319;1198	chebiId:30769;chebiId:30887	Citric acid;Isocitric acid	19782904;1198	gc
Citrulline@1.03-qpneg	Citrulline	1.026	Amino acids	C6H13N3O3	175.096	HMDB00904	C00327	833;9750;25244873	chebiId:16349	Citrulline	25244873	qpneg
Creatine@12.98-gc	Creatine	12.978	Amino acids	C4H9N3O2	131.069	HMDB00064	C00300	586	chebiId:16919	Creatine	586	gc
Creatinine@1.02-qppos	Creatinine	1.015	Amino acids	C4H7N3O	113.059	HMDB00562	C00791	588	chebiId:16737	Creatinine	588	qppos
Cystine@0.98-qppos	Cystine	0.976	Amino acids	C6H12N2O4S2	240.024	HMDB00192	C00491	67678	chebiId:16283	Cystine	67678	qppos
Cytidine@1.17-qppos	Cytidine	1.168	Nucleosides	C9H13N3O5	243.086	HMDB00089	C00475	6175;596	chebiId:17562	Cytidine	596	qppos
Cytosine@1.35-qppos	Cytosine	1.345	Bases	C4H5N3O	111.043	HMDB00630	C00380	597	chebiId:16040	Cytosine	597	qppos
Decenoic acid@14.97-qpneg	Decenoic acid	14.971	Fatty Acyls	C10H18O2	170.131	HMDB39768;HMDB41012;HMDB04980	-	5312351;5362593;5362594	-	Decenoic acid	5312351	qpneg
Deoxycholic acid@10.50-ba	Deoxycholic acid	10.504	Steroids	C24H40O4	392.293	HMDB00626	C11171;C04483	222528;2987;23668196	chebiId:9177;chebiId:28834	Deoxycholic acid	2987	ba
Desaminotyrosine*@8.62-qpneg	Desaminotyrosine*	8.624	-	-	-	-	-	-	-	-	-	qpneg
Dimethylarginine@1.02-qppos	Dimethylarginine	1.017	Amino acids	C8H18N4O2	202.143	HMDB01539;HMDB03334	C03626	123831	chebiId:17929	Dimethylarginine	123831	qppos
Dimethylglycine@1.02-qppos	Dimethylglycine	1.018	Amino acids	C4H9NO2	103.063	HMDB00092	C01026	673	chebiId:17724	Dimethylglycine	673	qppos
Docosadienoic acid@23.05-qpneg	Docosadienoic acid	23.048	Fatty Acyls	C22H40O2	336.303	-	C16533	5282807;5312554	chebiId:75117	Docosadienoic acid	5282807	qpneg
Docosahexaenoic acid@20.27-qpneg	Docosahexaenoic acid	20.267	Fatty Acyls	C22H32O2	328.24	HMDB02183	C06429	445580	chebiId:28125	Docosahexaenoic acid	445580	qpneg
Docosapentaenoic acid@20.69-qpneg	Docosapentaenoic acid	20.688	Fatty Acyls	C22H34O2	330.256	HMDB01976;HMDB06528	C16513	6441454;5497182;3035421	chebiId:53488	Docosapentaenoic acid	3035421	qpneg
Docosatetraenoic acid@21.40-qpneg	Docosatetraenoic acid	21.399	-	-	-	-	-	-	-	-	-	qpneg
Docosatrienoic acid@22.23-qpneg	Docosatrienoic acid	22.225	Fatty Acyls	C22H38O2	334.287	HMDB02823	C16534	5312556	chebiId:80549	Docosatrienoic acid	5312556	qpneg
Docosenoic acid@24.00-qpneg	Docosenoic acid	24	Fatty Acyls	C22H42O2	338.318	HMDB02068	C08316	5281116	chebiId:28792	Docosenoic acid	5281116	qpneg
Dodecanedioic acid@13.17-qpneg	Dodecanedioic acid	13.172	Fatty Acyls	C12H22O4	230.152	HMDB00623	C02678	12736	chebiId:4676	Dodecanedioic acid	12736	qpneg
Dodecenedioic acid@12.58-qpneg	Dodecenedioic acid	12.584	Fatty Acyls	C12H20O4	228.136	HMDB00933	C16308	5283028	chebiId:545687	Traumatic acid	5283028	qpneg
Dodecenoic acid@16.81-qpneg	Dodecenoic acid	16.806	Fatty Acyls	C12H22O2	198.162	HMDB00529;HMDB10729;HMDB32248	-	5312378;5282729;125207	-	Dodecenoic acid	125207	qpneg
Eicosadienoic acid@21.72-qpneg	Eicosadienoic acid	21.717	Fatty Acyls	C20H36O2	308.272	HMDB05060	C16525	6439848	chebiId:73731	Eicosadienoic acid	6439848	qpneg
Eicosapentaenoic acid@19.59-qpneg	Eicosapentaenoic acid	19.585	Fatty Acyls	C20H30O2	302.225	HMDB01999	C06428	446284	chebiId:28364	Eicosapentaenoic acid	446284	qpneg
Eicosatrienoic acid@20.89-qpneg	Eicosatrienoic acid	20.892	Fatty Acyls	C20H34O2	306.256	HMDB60039	C16522	5312529	chebiId:53460	Dihomo-linolenic acid	5312529	qpneg
Eicosenoic acid@22.67-qpneg	Eicosenoic acid	22.675	Fatty Acyls	C20H38O2	310.287	HMDB02231	C16526	5282768	chebiId:32425	Eicosenoic acid	5282768	qpneg
Erythritol@12.47-gc	Erythritol	12.467	Carbohydrates	C4H10O4	122.058	HMDB02994	C00503	222285;8998	chebiId:17113;chebiId:48299	Erythritol	8998	gc
Ferulic acid@19.52-gc	Ferulic acid	19.525	Flavonoids	C10H10O4	194.058	HMDB00537;HMDB00954	C01494	445858;709	chebiId:17620	Ferulic acid	445858	gc
FMN@7.72-qpneg	FMN	7.72	Nucleotides	C17H21N4O9P	456.105	HMDB01520	C00061	710;643976	chebiId:17621	FMN	710	qpneg
Fructose@16.68-gc	Fructose	16.677	Carbohydrates	C6H12O6	180.063	HMDB00660	C00095;C02336	5984;439163;439709	chebiId:15824;chebiId:37721;chebiId:28645	Fructose	439163	gc
Fumaric acid@10.24-gc	Fumaric acid	10.24	Organic acids	C4H4O4	116.011	HMDB00134	C00122	444972	chebiId:18012	Fumaric acid	444972	gc
GABA@12.62-gc	GABA	12.62	Amino acids	C4H9NO2	103.063	HMDB00112	C00334	119;6992099	chebiId:16865	GABA	119	gc
Galactitol;Sorbitol;Mannitol@17.52-gc	Galactitol;Sorbitol;Mannitol	17.522	Carbohydrates	C6H14O6	182.079	HMDB00107;HMDB00765;HMDB00247	C01697;C00392;C00794	11850;6251;5780	chebiId:16813;chebiId:16899;chebiId:17924	Galactitol;Mannitol;Sorbitol	11850;6251;5780	gc
Galactose;Glucose;Mannose@17.06-gc	Galactose;Glucose;Mannose	17.059	Carbohydrates	C6H12O6	180.063	HMDB00143;HMDB33704;HMDB00122;HMDB03345;HMDB00516;HMDB00169	C00124;C01582;C00984;C01825;C00031;C00267;C00221;C00159	439357;6036;3037556;12003287;79025;5793;206;64689;161658;18950	chebiId:4139;chebiId:28061;chebiId:28260;chebiId:42905;chebiId:4167;chebiId:17925;chebiId:15903;chebiId:4208	Galactose;Glucose;Mannose	12003287;206;161658	gc
Gamma-glutamylleucine@3.22-qppos	Gamma-glutamylleucine	3.22	Peptides	C11H20N2O5	260.137	HMDB11171	-	151023	-	Gamma-glutamylleucine	151023	qppos
Gamma-glutamyllysine@1.00-qppos	Gamma-glutamyllysine	0.995	-	-	-	-	-	-	-	-	-	qppos
Gamma-glutamylthreonine@1.10-qppos	Gamma-glutamylthreonine	1.1	Peptides	C9H16N2O6	248.101	HMDB28829	-	6998031	-	Gamma-glutamylthreonine	6998031	qppos
Gamma-glutamyltryptophan@6.58-qppos	Gamma-glutamyltryptophan	6.582	-	-	-	-	-	-	-	-	-	qppos
Gamma-glutamyltyrosine@2.77-qppos	Gamma-glutamyltyrosine	2.767	Peptides	C14H18N2O6	310.116	HMDB11741	-	94340	-	Gamma-glutamyltyrosine	94340	qppos
Glucuronic acid;Galacturonic acid@1.03-qpneg	Glucuronic acid;Galacturonic acid	1.026	Carbohydrates	C6H10O7	194.043	HMDB02545;HMDB03402;HMDB00127	C08348;C00333;C00191	84740;152867;19770757;441476;439215;94715;444791;610	chebiId:33830;chebiId:47954;chebiId:12952;chebiId:4153;chebiId:4178;chebiId:47952	Galacturonic acid;Glucuronic acid	152867;610	qpneg
Glutamic acid@13.70-gc	Glutamic acid	13.7	Amino acids	C5H9NO4	147.053	HMDB03339;HMDB00148	C00025;C00302;C00217	611;33032;57397101;23327	chebiId:16015;chebiId:15966;chebiId:18327	Glutamic acid	57397101	gc
Glutarylcarnitine@1.43-qppos	Glutarylcarnitine	1.434	Fatty Acyls	C12H21NO6	275.137	HMDB13130	-	53481622	-	Glutarylcarnitine	53481622	qppos
Glutathione@1.30-qppos	Glutathione	1.298	Peptides	C10H17N3O6S	307.084	HMDB00125	C00051	124886;745;60072620	chebiId:16856	Glutathione	60072620	qppos
Glyceric acid@10.13-gc	Glyceric acid	10.132	Carbohydrates	C3H6O4	106.027	HMDB00139	C00258	752;439194	chebiId:32398	Glyceric acid	752	gc
Glycerol@9.37-gc	Glycerol	9.367	Carbohydrates	C3H8O3	92.047	HMDB00131	C00116	753	chebiId:17754	Glycerol	753	gc
Glycerol-3-phosphate@1.05-qpneg	Glycerol-3-phosphate	1.05	Lipids	C3H9O6P	172.014	HMDB00126	C00093	754;439162	chebiId:15978	Glycerol-3-phosphate	754	qpneg
Glycerophosphorylcholine@1.02-qppos	Glycerophosphorylcholine	1.016	Lipids	C8H20NO6P	257.103	HMDB00086	C00670	657272;439285;11234	chebiId:16870	Glycerophosphorylcholine	11234	qppos
Glycine@9.78-gc	Glycine	9.783	Amino acids	C2H5NO2	75.032	HMDB00123	C00037	750;5257127	chebiId:15428	Glycine	5257127	gc
Glycocholic acid@5.90-ba	Glycocholic acid	5.897	Steroids	C26H43NO6	465.309	HMDB00138	C01921	10140;23617285;755	chebiId:17687	Glycocholic acid	755	ba
Glycolic acid@6.37-gc	Glycolic acid	6.366	Organic acids	C2H4O3	76.016	HMDB00115	C00160	757;3698251	chebiId:17497	Glycolic acid	3698251	gc
Glycylglycine@0.99-qppos	Glycylglycine	0.993	Peptides	C4H8N2O3	132.053	HMDB11733	C02037	11163;1548897	chebiId:17201	Glycylglycine	11163	qppos
Heptadecatrienoic acid@18.89-qpneg	Heptadecatrienoic acid	18.889	Fatty Acyls	C17H28O2	264.209	-	C16344	16061034	chebiId:76235	Heptadecatrienoic acid	16061034	qpneg
Heptadecenoic acid@20.58-qpneg	Heptadecenoic acid	20.576	Fatty Acyls	C17H32O2	268.24	HMDB31046;HMDB60038	C16536	5312435;5312440	chebiId:80550	Heptadecenoic acid	5312435	qpneg
Hexadecadienoic acid@18.97-qpneg	Hexadecadienoic acid	18.968	Fatty Acyls	C16H28O2	252.209	HMDB00477	-	13932172	-	Hexadecadienoic acid	13932172	qpneg
Hexadecanedioic acid@16.59-qpneg	Hexadecanedioic acid	16.592	Fatty Acyls	C16H30O4	286.214	HMDB00672	C19615	10459	chebiId:73722	Hexadecanedioic acid	10459	qpneg
Hexanoylglycine*@7.08-qpneg	Hexanoylglycine*	7.08	-	-	-	-	-	-	-	-	-	qpneg
Hippuric acid@5.97-qpneg	Hippuric acid	5.967	Unclassified	C9H9NO3	179.058	HMDB00714	C01586	464	chebiId:18089	Hippuric acid	464	qpneg
Histidine@17.08-gc	Histidine	17.077	Amino acids	C6H9N3O2	155.069	HMDB00177	C00135	6274;773;3651426	-	Histidine	3651426	gc
Homoserine@1.00-qppos	Homoserine	0.996	Amino acids	C4H9NO3	119.058	HMDB00719	C00263	12647;1502076;779;25245858;193314	chebiId:15699	Homoserine	193314	qppos
Homovanillic acid@4.37-qpneg	Homovanillic acid	4.373	Unclassified	C9H10O4	182.058	HMDB00118	C05582	1738	chebiId:545959	Homovanillic acid	1738	qpneg
Hydroxyphenyllactic acid*@4.37-qpneg	Hydroxyphenyllactic acid*	4.368	-	-	-	-	-	-	-	-	-	qpneg
Hyodeoxycholic acid@9.27-ba	Hyodeoxycholic acid	9.274	Steroids	C24H40O4	392.293	HMDB00733	-	9963687;227033	-	Hyodeoxycholic acid	227033	ba
Hypotaurine@13.47-gc	Hypotaurine	13.474	Organic acids	C2H7NO2S	109.02	HMDB00965	C00519	107812;25244088	chebiId:16668	Hypotaurine	107812	gc
Hypoxanthine@2.32-qppos	Hypoxanthine	2.322	Bases	C5H4N4O	136.039	HMDB00157	C00262	790	chebiId:17368	Hypoxanthine	790	qppos
Indole-2-carboxylic acid@10.48-qpneg	Indole-2-carboxylic acid	10.477	Indoles	C9H7NO2	161.048	HMDB02285	-	72899	-	Indole-2-carboxylic acid	72899	qpneg
Indole-3-acrylic acid@10.87-qpneg	Indole-3-acrylic acid	10.874	Indoles	C11H9NO2	187.063	HMDB00734	-	15030923	-	Indole-3-acrylic acid	15030923	qpneg
Indole-3-aldehyde@9.59-qpneg	Indole-3-aldehyde	9.595	-	-	-	-	-	-	-	-	-	qpneg
Indole-3-lactic acid@8.35-qpneg	Indole-3-lactic acid	8.353	Indoles	C11H11NO3	205.074	HMDB00671	C02043	92904	chebiId:17282;chebiId:24813	Indole-3-lactic acid	92904	qpneg
Indole-3-propionic acid@10.93-qpneg	Indole-3-propionic acid	10.928	Indoles	C11H11NO2	189.079	HMDB02302	-	3744	-	Indole-3-propionic acid	3744	qpneg
Inosine@2.43-qppos	Inosine	2.431	Nucleosides	C10H12N4O5	268.081	HMDB00195	C00294	6021	chebiId:17596	Inosine	6021	qppos
Inositol@19.94-gc	Inositol	19.944	Unclassified	C6H12O6	180.063	HMDB06088;HMDB00211	C06153;C00137;C19891	892	chebiId:10642;chebiId:17268	Inositol	892	gc
Isobutyric acid@4.89-sf	Isobutyric acid	4.895	Organic acids	C4H8O2	88.052	HMDB01873	C02632	6590	chebiId:16135	Isobutyric acid	6590	sf
Isocaproic acid@11.78-sf	Isocaproic acid	11.784	Fatty Acyls	C6H12O2	116.084	HMDB00689	-	12587	-	Isocaproic acid	12587	sf
Isoleucine@9.61-gc	Isoleucine	9.609	Amino acids	C6H13NO2	131.095	HMDB00172	C00407	791;6306	chebiId:17191	Isoleucine	791	gc
Isovaleric acid@9.01-sf	Isovaleric acid	9.009	Fatty Acyls	C5H10O2	102.068	HMDB00718	C08262	10430	chebiId:28484	Isovaleric acid	10430	sf
Ketoisovaleric acid@7.48-gc	Ketoisovaleric acid	7.479	Organic acids	C5H8O3	116.047	HMDB00019	C00141	49	chebiId:11851;chebiId:16530	Ketoisovaleric acid	49	gc
Kynurenine@21.46-gc	Kynurenine	21.459	Unclassified	C10H12N2O3	208.085	HMDB00684	C00328	846;161166;25245862	chebiId:16946	Kynurenine	25245862	gc
Lactic acid@6.49-gc	Lactic acid	6.49	Organic acids	C3H6O3	90.032	HMDB01311;HMDB00190	C00256;C00186	61503;107689;19789253;612	chebiId:341;chebiId:42111;chebiId:422	Lactic acid	19789253	gc
Lactose@27.38-gc	Lactose	27.381	Carbohydrates	C12H22O11	342.116	HMDB00186	C00243	84571;440995	chebiId:17716	Lactose	440995	gc
Lauric acid@17.72-qpneg	Lauric acid	17.719	Fatty Acyls	C12H24O2	200.178	HMDB00638	C02679	3893	chebiId:30805	Lauric acid	3893	qpneg
Leucine@9.31-gc	Leucine	9.309	Amino acids	C6H13NO2	131.095	HMDB00687	C00123	6106;857;5255803	chebiId:15603	Leucine	5255803	gc
Leucylproline@0.99-qppos	Leucylproline	0.988	Peptides	C11H20N2O3	228.147	HMDB11175	-	44369311	-	Leucylproline	44369311	qppos
Linoleic acid@20.35-qpneg	Linoleic acid	20.354	Fatty Acyls	C18H32O2	280.24	HMDB00673	C01595	5280450;3931	chebiId:17351	Linoleic acid	3931	qpneg
Linolenic acid@19.59-qpneg	Linolenic acid	19.589	Fatty Acyls	C18H30O2	278.225	HMDB01388	C06427	5280934;860	chebiId:27432	Linolenic acid	5280934	qpneg
Lysine@17.08-gc	Lysine	17.079	Amino acids	C6H14N2O2	146.106	HMDB03405;HMDB00182	C00739;C00047	57449;5962;866;5248709	chebiId:16855;chebiId:18019	Lysine	5248709	gc
Malic acid@12.15-gc	Malic acid	12.154	Organic acids	C4H6O5	134.022	HMDB00156;HMDB00744	C00149;C00711	525;20130941;222656	chebiId:30797;chebiId:6650	Malic acid	20130941	gc
Malonylcarnitine@1.17-qppos	Malonylcarnitine	1.165	Fatty Acyls	C10H17NO6	247.106	HMDB02095	-	22833583	-	Malonylcarnitine	22833583	qppos
Maltose;Trehalose@27.72-gc	Maltose;Trehalose	27.719	Carbohydrates	C12H22O11	342.116	HMDB00163;HMDB00975	C00208;C01083	439341;6255;439186;294;7427;1143	chebiId:17306;chebiId:16551	Maltose;Trehalose	294;1143	gc
Margaric acid@20.27-gc	Margaric acid	20.267	Fatty Acyls	C17H34O2	270.256	HMDB02259	-	10465	-	Margaric acid	10465	gc
Methionine@12.49-gc	Methionine	12.493	Amino acids	C5H11NO2S	149.051	HMDB00696	C00073	6137;876;5255805	chebiId:16643	Methionine	5255805	gc
Methyl-indole-3-acetic-acid@10.92-qpneg	Methyl-indole-3-acetic-acid	10.923	-	-	-	-	-	-	-	-	-	qpneg
Methylmalonic acid@1.55-qpneg	Methylmalonic acid	1.55	Organic acids	C4H6O4	118.027	HMDB00202	C02170	487	chebiId:30860	Methylmalonic acid	487	qpneg
Myristic acid@19.39-qpneg	Myristic acid	19.395	Fatty Acyls	C14H28O2	228.209	HMDB00806	C06424	11005	chebiId:28875;chebiId:30807	Myristic acid	11005	qpneg
Myristoleic acid@18.31-qpneg	Myristoleic acid	18.313	Fatty Acyls	C14H26O2	226.193	HMDB02000	C08322	5281119	chebiId:27781	Myristoleic acid	5281119	qpneg
N-acetylaspartic acid@1.42-qpneg	N-acetylaspartic acid	1.425	Amino acids	C6H9NO5	175.048	HMDB00812	C01042	65065;97508	chebiId:16953;chebiId:21547	N-acetylaspartic acid	97508	qpneg
N-acetylglutamic acid@1.67-qpneg	N-acetylglutamic acid	1.669	Amino acids	C7H11NO5	189.064	HMDB01138	C00624	70914	chebiId:17533;chebiId:44337	N-acetylglutamic acid	70914	qpneg
N-acetylglutamine@1.44-qppos	N-acetylglutamine	1.442	Amino acids	C7H12N2O4	188.08	HMDB06029	-	182230	chebiId:17008	N-acetylglutamine	182230	qppos
N1-acetylspermidine@5.38-pa	N1-acetylspermidine	5.383	Amino acids	C9H21N3O	187.168	HMDB01276	C00612	496	chebiId:17927	N-acetylspermine	496	pa
N6-acetyllysine;N2-acetyllysine@1.26-qppos	N6-acetyllysine;N2-acetyllysine	1.256	Amino acids	C8H16N2O3	188.116	HMDB00446;HMDB00206	C12989;C02727	92907;265949;92832	chebiId:35704;chebiId:17752	N2-acetyllysine;N6-acetyllysine	92907;265949	qppos
N8-acetylspermidine@5.57-pa	N8-acetylspermidine	5.574	Amino acids	C9H21N3O	187.168	HMDB02189	C01029	123689	chebiId:27911	N-acetylspermidine	123689	pa
NAAG@1.78-qppos	NAAG	1.78	Peptides	C11H16N2O8	304.091	HMDB01067	C12270	5255;188803	chebiId:73688	NAAG	5255	qppos
Niacinamide@2.38-qppos	Niacinamide	2.381	Unclassified	C6H6N2O	122.048	HMDB01406	C00153	936	chebiId:17154	Niacinamide	936	qppos
Nicotinic acid@9.61-gc	Nicotinic acid	9.613	Unclassified	C6H5NO2	123.032	HMDB01488	C00253	938;117629482	chebiId:15940	Nicotinic acid	117629482	gc
Nonadecanoic acid@23.17-qpneg	Nonadecanoic acid	23.171	Fatty Acyls	C19H38O2	298.287	HMDB00772	C16535	12591	chebiId:39246	Nonadecanoic acid	12591	qpneg
Nonadecenoic acid@22.00-qpneg	Nonadecenoic acid	21.997	Fatty Acyls	C19H36O2	296.272	HMDB13622	-	5312513	chebiId:37527	Nonadecenoic acid	5312513	qpneg
Nonanoic acid@14.76-qpneg	Nonanoic acid	14.755	Fatty Acyls	C9H18O2	158.131	HMDB00847	C01601	8158	chebiId:29019	Nonanoic acid	8158	qpneg
Oleic acid;Elaidic acid;Vaccenic acid@21.29-qpneg	Oleic acid;Elaidic acid;Vaccenic acid	21.294	Fatty Acyls	C18H34O2	282.256	HMDB00573;HMDB00207;HMDB03231	C01712;C00712;C08367	637517;445639;5282761;5281127	chebiId:27997;chebiId:16196;chebiId:28727	Oleic acid;Elaidic acid;Vaccenic acid	637517;445639;5281127	qpneg
Omega-muricholic acid@5.89-ba	Omega-muricholic acid	5.888	Steroids	C24H40O5	408.288	HMDB00364	C17727	5283851	chebiId:81299	omega-muricholic acid	5283851	ba
Ornithine@2.24-pa	Ornithine	2.243	Amino acids	C5H12N2O2	132.09	HMDB03374;HMDB00214	C00077;C00515	6262;389;71082	chebiId:15729;chebiId:16176	Ornithine	389	pa
Ox. glutathione@1.43-qppos	Ox. glutathione	1.426	Peptides	C20H32N6O12S2	612.152	HMDB03337	C00127	65359;975;5255796	chebiId:17858	Ox. glutathione	5255796	qppos
Palmitic acid@20.96-qpneg	Palmitic acid	20.958	Fatty Acyls	C16H32O2	256.24	HMDB00220	C00249	985	chebiId:15756	Palmitic acid	985	qpneg
Palmitoleic acid@19.83-qpneg	Palmitoleic acid	19.833	Fatty Acyls	C16H30O2	254.225	HMDB03229	C08362	445638;4668	chebiId:28716	Palmitoleic acid	445638	qpneg
Pantothenic acid@18.07-gc	Pantothenic acid	18.073	Amino acids	C9H17NO5	219.111	HMDB00210	C00864	6613;988	chebiId:29032;chebiId:46905;chebiId:7916	Pantothenic acid	988	gc
PCae(14:0)@15.53-qppos	PCae(14:0)	15.534	Lipids	C22H46NO7P	467.301	HMDB10379	-	460604;24779490	-	PCae(14:0)	24779490	qppos
PCae(16:0)@17.15-qppos	PCae(16:0)	17.145	Lipids	C24H50NO7P	495.332	HMDB10382	-	460602;9827122;15061532;10097314;86554	-	PCae(16:0)	86554	qppos
PCae(16:1)@16.06-qppos	PCae(16:1)	16.058	Lipids	C24H48NO7P	493.317	HMDB10383	-	24779461;24779462;24779460	-	PCae(16:1)	24779462	qppos
PCae(17:0)@17.94-qppos	PCae(17:0)	17.94	Lipids	C25H52NO7P	509.348	HMDB12108	-	24779463;24779464	-	PCae(17:0)	24779464	qppos
PCae(18:0)@18.91-qppos	PCae(18:0)	18.906	Lipids	C26H54NO7P	523.364	HMDB11128;HMDB10384	-	497299;24779491;18684067;86556;10436817;10208382	-	PCae(18:0)	10208382	qppos
PCae(18:1)@17.61-qppos	PCae(18:1)	17.614	Lipids	C26H52NO7P	521.348	HMDB10385;HMDB02815	-	16081932;53480465;24779493;6449974;24779492;10279683;24779465;24779466;6030826;15120177;24779494	-	PCae(18:1)	10279683	qppos
PCae(18:2)@16.57-qppos	PCae(18:2)	16.571	Lipids	C26H50NO7P	519.332	HMDB10386	-	11005824;24779467;11988421	-	PCae(18:2)	11988421	qppos
PCae(18:3)@15.91-qppos	PCae(18:3)	15.913	Lipids	C26H48NO7P	517.317	HMDB10387;HMDB10388	-	52924045;24779469	-	PCae(18:3)	24779469	qppos
PCae(20:1)@19.32-qppos	PCae(20:1)	19.319	Lipids	C28H56NO7P	549.379	HMDB10391	-	52924051	-	PCae(20:1)	52924051	qppos
PCae(20:2)@18.21-qppos	PCae(20:2)	18.208	Lipids	C28H54NO7P	547.364	HMDB10392	-	52924053	-	PCae(20:2)	52924053	qppos
PCae(22:3)@21.03-qppos	PCae(22:3)	21.031	-	-	-	-	-	-	-	-	-	qppos
PCae(22:4)@17.92-qppos	PCae(22:4)	17.918	Lipids	C30H54NO7P	571.364	HMDB10401	-	52924039	-	PCae(22:4)	52924039	qppos
PCae(22:6)@16.78-qppos	PCae(22:6)	16.776	Lipids	C30H50NO7P	567.332	HMDB10404	-	10415542	-	PCae(22:6)	10415542	qppos
PCee(16:0)@18.03-qppos	PCee(16:0)	18.028	Lipids	C24H52NO6P	481.353	-	-	-	-	PCee(16:0)	-	qppos
Pentadecanoic acid@20.19-qpneg	Pentadecanoic acid	20.188	Fatty Acyls	C15H30O2	242.225	HMDB00826	C16537	13849	chebiId:42504	Pentadecanoic acid	13849	qpneg
Phenylalanine@13.78-gc	Phenylalanine	13.78	Amino acids	C9H11NO2	165.079	HMDB00159	C00079	6140;994;57397115	chebiId:17295	Phenylalanine	57397115	gc
Phosphocreatine@1.17-qppos	Phosphocreatine	1.169	Amino acids	C4H10N3O5P	211.036	HMDB01511	C02305	587;9548602	chebiId:17287	Phosphocreatine	587	qppos
Phosphoenolpyruvic acid@1.15-qpneg	Phosphoenolpyruvic acid	1.145	Organic acids	C3H5O6P	167.982	HMDB00263	C00074	1005	chebiId:18021;chebiId:44897	Phosphoenolpyruvic acid	1005	qpneg
Phosphoric acid@9.39-gc	Phosphoric acid	9.392	Unclassified	H3O4P	97.977	HMDB01429;HMDB02142	C00009	1004	chebiId:18367;chebiId:26078	Phosphoric acid	1004	gc
Proline@9.65-gc	Proline	9.647	Amino acids	C5H9NO2	115.063	HMDB03411;HMDB00162	C00763;C00148	8988;145742;25246272;614	chebiId:16313;chebiId:17203	Proline	25246272	gc
Proline betaine@1.21-qppos	Proline betaine	1.212	Amino acids	C7H13NO2	143.095	HMDB04827	C10172	115244	chebiId:35280	Proline betaine	115244	qppos
Propionic acid@2.88-sf	Propionic acid	2.881	Organic acids	C3H6O2	74.037	HMDB00237	C00163	1032	chebiId:30768	Propionic acid	1032	sf
Putrescine@4.74-pa	Putrescine	4.737	Unclassified	C4H12N2	88.1	HMDB01414	C00134	1045	chebiId:17148	Putrescine	1045	pa
Pyruvic acid;Oxaloacetic acid@6.36-gc	Pyruvic acid;Oxaloacetic acid	6.362	Organic acids	C4H4O5;C3H4O3	110.011	HMDB00223;HMDB00243	C00036;C00022	970;1060	chebiId:30744;chebiId:32816	Oxaloacetic acid;Pyruvic acid	970;1060	gc
Raffinose@31.39-gc	Raffinose	31.387	Carbohydrates	C18H32O16	504.169	HMDB03213	C00492	10542;219993;439242	chebiId:16634	Raffinose	219993	gc
Ribitol@15.04-gc	Ribitol	15.038	Carbohydrates	C5H12O5	152.068	HMDB00508	C00474	827	chebiId:15963	Ribitol	827	gc
Ribose-5-phosphate;Ribulose-5-phosphate@1.05-qpneg	Ribose-5-phosphate;Ribulose-5-phosphate	1.049	Carbohydrates	C5H11O8P	230.019	HMDB01548;HMDB00618	C00117;C00199;C01101	439167;439184;439399	chebiId:17797;chebiId:52742;chebiId:17363;chebiId:17666	Ribose-5-phosphate;Ribulose-5-phosphate	439167;439184	qpneg
Ribose;Ribulose@14.51-gc	Ribose;Ribulose	14.511	Carbohydrates	C5H10O5	150.053	HMDB00283;HMDB00621;HMDB03371	C00121;C00309;C00508	5779;993;79021;439204;439203	chebiId:47013;chebiId:17173;chebiId:16880	Ribose;Ribulose	993;79021	gc
S-adenosylmethionine@4.19-pa	S-adenosylmethionine	4.193	Nucleosides	C15H22N6O5S	398.137	HMDB01185	C00019	34756;34755;5136	chebiId:15414;chebiId:67040	S-adenosylmethionine	5136	pa
Sebacic acid@17.07-gc	Sebacic acid	17.073	Fatty Acyls	C10H18O4	202.121	HMDB00792	C08277	5192	chebiId:41865	Sebacic acid	5192	gc
Serine@10.52-gc	Serine	10.516	Amino acids	C3H7NO3	105.043	HMDB00187;HMDB03406	C00065;C00740	5951;617;6857552;71077	chebiId:17115	Serine	617	gc
Spermidine@6.69-pa	Spermidine	6.693	Unclassified	C7H19N3	145.158	HMDB01257	C00315	1102	chebiId:16610	Spermidine	1102	pa
Spermine@7.48-pa	Spermine	7.478	Unclassified	C10H26N4	202.216	HMDB01256	C00750	1103	chebiId:15746	Spermine	1103	pa
Sphingosine-1-phosphate@14.97-qpneg	Sphingosine-1-phosphate	14.974	Lipids	C18H38NO5P	379.249	HMDB00277	C06124	5283560;5353956	chebiId:37550	Sphingosine-1-phosphate	5353956	qpneg
Stearic acid@22.46-qpneg	Stearic acid	22.461	Fatty Acyls	C18H36O2	284.272	HMDB00827	C01530	5281	chebiId:25629;chebiId:28842	Stearic acid	5281	qpneg
Stearidonic acid@18.89-qpneg	Stearidonic acid	18.893	Fatty Acyls	C18H28O2	276.209	HMDB06547	C16300	5312508	chebiId:32389	Stearidonic acid	5312508	qpneg
Succinic acid@8.62-sf	Succinic acid	8.617	Organic acids	C4H6O4	118.027	HMDB00254	C00042	1110;21952380	chebiId:15741	Succinic acid	1110	sf
Succinyladenosine@5.70-qppos	Succinyladenosine	5.702	Nucleosides	C14H17N5O8	383.108	HMDB00912	-	20849086	-	Succinyladenosine	20849086	qppos
Sucrose@27.03-gc	Sucrose	27.032	Carbohydrates	C12H22O11	342.116	HMDB00258	C00089	5988;1115	chebiId:17992	Sucrose	1115	gc
Taurine@1.01-qpneg	Taurine	1.006	Organic acids	C2H7NO3S	125.015	HMDB00251	C00245	1123;4068592	chebiId:15891	Taurine	1123	qpneg
Tauro-alpha-muricholic acid;Tauro-beta-muricholic acid;Tauro-omega-muricholic acid@2.38-ba	Tauro-alpha-muricholic acid;Tauro-beta-muricholic acid;Tauro-omega-muricholic acid	2.375	Steroids	C26H45NO7S	515.292	HMDB00932	-	101657566;168408	chebiId:133057	TAURO Î±-MURICHOLIC ACID SODIUM SALT;Tauro-beta-muricholic acid	101657566;168408	ba
Taurochenodeoxycholic acid@7.01-ba	Taurochenodeoxycholic acid	7.012	Steroids	C26H45NO6S	499.297	HMDB00951	C05465	387316	chebiId:16525;chebiId:9407	Taurochenodeoxycholic acid	387316	ba
Taurocholic acid@4.51-ba	Taurocholic acid	4.514	Steroids	C26H45NO7S	515.292	HMDB00036	C05122	440567;5247;46783527	chebiId:28865	Taurocholic acid	5247	ba
Taurodeoxycholic acid@8.12-ba	Taurodeoxycholic acid	8.121	Steroids	C26H45NO6S	499.297	HMDB00896	C05463	2733768;440687;92042745	chebiId:36261;chebiId:9410	Taurodeoxycholic acid	2733768	ba
Taurohyodeoxycholic acid@4.22-ba	Taurohyodeoxycholic acid	4.216	Steroids	C26H45NO6S	499.297	-	-	119046	-	Taurohyodeoxycholic acid	119046	ba
Tauroursodeoxycholic acid@4.05-ba	Tauroursodeoxycholic acid	4.055	Steroids	C26H45NO6S	499.297	HMDB00874	-	12443252	-	Tauroursodeoxycholic acid	12443252	ba
Tetradecadienoic acid@17.58-qpneg	Tetradecadienoic acid	17.58	Fatty Acyls	C14H24O2	224.178	HMDB00560	-	5312409	-	Tetradecadienoic acid	5312409	qpneg
Tetradecanedioic acid@14.99-qpneg	Tetradecanedioic acid	14.988	Fatty Acyls	C14H26O4	258.183	HMDB00872	-	13185	-	Tetradecanedioic acid	13185	qpneg
Threonic acid@12.91-gc	Threonic acid	12.908	Carbohydrates	C4H8O5	136.037	HMDB00943	C01620	151152;439535;5460407	chebiId:15908;chebiId:49060	Threonic acid	439535	gc
Threonine@10.88-gc	Threonine	10.876	Amino acids	C4H9NO3	119.058	HMDB00167	C00188	6288;205;15341575	chebiId:16857	Threonine	15341575	gc
Tryptophan@21.89-gc	Tryptophan	21.895	Indoles	C11H12N2O2	204.09	HMDB00929;HMDB30396	C00078;C00806	6305;1148;9060;4099458	chebiId:16828;chebiId:27897	Tryptophan	1148	gc
Tyrosine@17.28-gc	Tyrosine	17.278	Amino acids	C9H11NO3	181.074	HMDB00158	C00082	6057;1153;4300518	chebiId:17895	Tyrosine	1153	gc
UMP@1.38-qpneg	UMP	1.378	Nucleotides	C9H13N2O9P	324.036	HMDB00288	C00105	6030;1172	chebiId:16695	UMP	1172	qpneg
Undecanedioic acid@12.16-qpneg	Undecanedioic acid	12.156	Fatty Acyls	C11H20O4	216.136	HMDB00888	-	15816	-	Undecanedioic acid	15816	qpneg
Undecanoic acid@16.81-qpneg	Undecanoic acid	16.813	-	-	-	-	-	-	-	-	-	qpneg
Uracil@10.20-gc	Uracil	10.203	Bases	C4H4N2O2	112.027	HMDB00300	C00106	1174	chebiId:17568	Uracil	1174	gc
Urea@8.91-gc	Urea	8.911	Organic acids	CH4N2O	60.032	HMDB00294	C00086	1176	chebiId:16199	Urea	1176	gc
Uridine@1.70-qpneg	Uridine	1.696	Nucleosides	C9H12N2O6	244.07	HMDB00296	C00299	6029;1177	chebiId:16704	Uridine	1177	qpneg
Ursodeoxycholic acid@8.93-ba	Ursodeoxycholic acid	8.925	Steroids	C24H40O4	392.293	HMDB00946	C07880	31401	chebiId:9907	Ursodeoxycholic acid	31401	ba
Valeric acid@9.60-sf	Valeric acid	9.6	Fatty Acyls	C5H10O2	102.068	HMDB00892	C00803	7991	chebiId:17418	Valeric acid	7991	sf
Valine@8.56-gc	Valine	8.558	Amino acids	C5H11NO2	117.079	HMDB00883	C00183	6287;1182;5237032	chebiId:16414	Valine	1182	gc
Xanthine@2.39-qpneg	Xanthine	2.386	Bases	C5H4N4O2	152.033	HMDB00292	C00385	1188	chebiId:17712;chebiId:48517	Xanthine	1188	qpneg
Xylitol@14.85-gc	Xylitol	14.85	Carbohydrates	C5H12O5	152.068	HMDB02917	C00379	6912	chebiId:17151	Xylitol	6912	gc
Xylose@14.27-gc	Xylose	14.274	Carbohydrates	C5H10O5	150.053	HMDB00098	C00181	135191;6027	chebiId:15936;chebiId:53455	Xylose	135191	gc

## Sheet: Area
Sid	2-deoxycytidine@1.41-qppos	2-hydroxy-2-methylbutyric acid@3.49-sf	2-hydroxy-3-methylbutyric acid@4.61-sf	2-hydroxybutyric acid@2.50-sf	2-hydroxyglutaric acid@13.18-gc	2-oxoglutaric acid@13.19-gc	3-hydroxybutyric acid@1.67-sf	3-hydroxyglutaric acid@1.42-qpneg	3-indoxyl sulfuric acid@5.08-qpneg	3-methylglutarylcarnitine*@2.78-qppos	3-methylhistidine@0.98-qppos	3-phenylpropionic acid@10.51-qpneg	4-hydroxyproline@12.61-gc	5-aminovaleric acid@13.70-gc	5-oxoproline@12.54-gc	Acetic acid@1.79-sf	Acetylcarnitine@1.23-qppos	Acetylcholine@1.06-qppos	Alanine@7.03-gc	Allantoin@1.09-qpneg	Alpha-muricholic acid@6.01-ba	Anthranilic acid@13.61-gc	Arabinose@14.34-gc	Arabitol@14.98-gc	Arachidonic acid@20.31-qpneg	Arginine@0.98-qppos	Aspartic acid@12.54-gc	Azelaic acid@9.84-qpneg	Behenic acid@25.17-qpneg	Benzoic acid@9.73-sf	Beta-alanine@11.33-gc	Beta-muricholic acid@6.30-ba	Butanoic acid@5.30-sf	Cadaverine@4.75-pa	Capric acid@15.84-qpneg	Caproic acid@12.07-sf	Caprylic acid@13.51-qpneg	Carnitine@1.00-qppos	Carnitine C10:0@12.24-qppos	Carnitine C10:1@11.45-qppos	Carnitine C12:0@14.00-qppos	Carnitine C12:1@10.61-qppos	Carnitine C14:0(OH)@13.73-qppos	Carnitine C14:1@14.74-qppos	Carnitine C14:2@13.95-qppos	Carnitine C16:0@17.32-qppos	Carnitine C16:1@16.19-qppos	Carnitine C18:0@19.08-qppos	Carnitine C18:1@17.76-qppos
BlM_pre	NA	60	10484	17486	22910	875	82493	106529.192	NA	NA	830563.111	NA	4336	3467	240472	38587	9843.544	NA	43640	4004.058	NA	15719	6140	1684	236776.928	839242.299	5113	6678018.548	52417.132	10257	92318338	NA	7357	39672	6098681.918	8161	3226803.41	52458.047	NA	NA	NA	5688542.223	NA	NA	NA	NA	NA	NA	NA
BlM_prea	NA	NA	NA	NA	NA	NA	NA	NA	NA	NA	NA	NA	NA	NA	NA	NA	NA	NA	NA	NA	2343	NA	NA	NA	NA	NA	NA	NA	NA	NA	NA	10914	NA	NA	NA	NA	NA	NA	NA	NA	NA	NA	NA	NA	NA	NA	NA	NA	NA
BlM_post	NA	490	10547	19795	4137	429	93290	73247.976	NA	NA	29029.939	NA	1845	11681	242880	45217	3595.358	NA	92458	15221.139	298	693	4616	1346	352365.023	475359.095	2556	20556981.031	51542.106	10886	97080180	934	12477	35985	6233943.486	9003	3393730.203	51074.671	4531.126	NA	NA	6013409.742	NA	NA	NA	NA	NA	NA	NA
QC_plasma_4a	215440.089	12	18	45	NA	NA	354	5220739.228	78396492.423	71961.674	9281226.615	999016.283	NA	NA	NA	20974	92839313.668	2715273.034	NA	20361394.323	NA	NA	NA	NA	23029758.995	64048148.491	NA	1297699734.547	62722.057	10033	NA	NA	1436	53598	8679405.579	2055	3167401.448	115454469.233	187504.312	151892.321	174251.567	5531672.715	NA	438167.299	145122.117	802526.521	307521.205	100654.217	908938.33
QC_plasma_5a	NA	NA	NA	NA	1913421	380521	NA	NA	NA	NA	NA	NA	1401270	111419	2411086	NA	NA	NA	30609776	NA	NA	66027	540746	143383	NA	NA	273357	NA	NA	NA	114325186	NA	NA	NA	NA	NA	NA	NA	NA	NA	NA	NA	NA	NA	NA	NA	NA	NA	NA
QC_batch-plasma_5a	NA	NA	NA	NA	NA	NA	NA	NA	NA	NA	NA	NA	NA	NA	NA	NA	NA	NA	NA	NA	8763	NA	NA	NA	NA	NA	NA	NA	NA	NA	NA	100192	NA	NA	NA	NA	NA	NA	NA	NA	NA	NA	NA	NA	NA	NA	NA	NA	NA
QC_plasma_4b	171234.608	3	3	26	NA	NA	412	7080136.365	81197575.627	61537.483	9814927.621	981876.898	NA	NA	NA	20517	94585542.493	3092668.376	NA	20299664.552	NA	NA	NA	NA	24877615.314	61303951.205	NA	1313280671.274	82362.324	10280	NA	NA	1602	55565	9694856.958	2571	3480133.358	114327119.536	171703.958	179174.463	193951.23	5498451.207	14578.831	427943.298	122129.442	877667.925	277758.398	128835.533	1001282.682
QC_plasma_5b	NA	NA	NA	NA	1883116	454456	NA	NA	NA	NA	NA	NA	602524	172991	7267793	NA	NA	NA	34432381	NA	NA	52842	446528	115369	NA	NA	141069	NA	NA	NA	98509925	NA	NA	NA	NA	NA	NA	NA	NA	NA	NA	NA	NA	NA	NA	NA	NA	NA	NA
QC_batch-plasma_5b	NA	NA	NA	NA	NA	NA	NA	NA	NA	NA	NA	NA	NA	NA	NA	NA	NA	NA	NA	NA	8459	NA	NA	NA	NA	NA	NA	NA	NA	NA	NA	99634	NA	NA	NA	NA	NA	NA	NA	NA	NA	NA	NA	NA	NA	NA	NA	NA	NA
QC_plasma_4c	192392.523	10	20	45	NA	NA	610	7081038.164	80199036.727	65239.223	10810702.958	1077685.226	NA	NA	NA	21833	99115611.173	3535910.682	NA	20022018.021	NA	NA	NA	NA	23755359.847	68455677.242	NA	1385150579.644	115176.081	11916	NA	NA	2003	57566	9273519.213	2609	3966615.452	113879349.271	191852.21	154933.517	132330.303	5704141.842	7335.771	431674.929	142671.522	882288.867	304577.983	125136.64	975630.101
QC_batch-plasma_5c	NA	NA	NA	NA	NA	NA	NA	NA	NA	NA	NA	NA	NA	NA	NA	NA	NA	NA	NA	NA	6606	NA	NA	NA	NA	NA	NA	NA	NA	NA	NA	93826	NA	NA	NA	NA	NA	NA	NA	NA	NA	NA	NA	NA	NA	NA	NA	NA	NA
QC_plasma_6a	NA	NA	NA	NA	2087176	581922	NA	NA	NA	NA	NA	NA	804221	165539	13194524	NA	NA	NA	53383696	NA	NA	60380	472112	93876	NA	NA	152072	NA	NA	NA	97090424	NA	NA	NA	NA	NA	NA	NA	NA	NA	NA	NA	NA	NA	NA	NA	NA	NA	NA
QC_plasma_4d	167025.616	10	8	78	NA	NA	626	6725622.092	75072620.537	69159.966	9143340.773	963757.216	NA	NA	NA	22035	81800499.586	2744307.518	NA	20295749.229	NA	NA	NA	NA	22468548.132	59340444.092	NA	1401885453.599	69916.185	12552	NA	NA	2410	49598	8818504.614	3097	3908562.87	112542344.635	177517.003	134823.388	153275.997	5638009.798	5727.49	396018.316	130116.286	812376.947	254480.134	90886.411	981058.522
QC_batch-plasma_5d	NA	NA	NA	NA	NA	NA	NA	NA	NA	NA	NA	NA	NA	NA	NA	NA	NA	NA	NA	NA	5783	NA	NA	NA	NA	NA	NA	NA	NA	NA	NA	92851	NA	NA	NA	NA	NA	NA	NA	NA	NA	NA	NA	NA	NA	NA	NA	NA	NA
QC_plasma_6b	NA	NA	NA	NA	2159027	619251	NA	NA	NA	NA	NA	NA	903800	248331	14880509	NA	NA	NA	58862113	NA	NA	59195	495606	83572	NA	NA	173212	NA	NA	NA	95809620	NA	NA	NA	NA	NA	NA	NA	NA	NA	NA	NA	NA	NA	NA	NA	NA	NA	NA
QC_plasma_4e	205550.636	6	42	58	NA	NA	505	6982578.28	78212153.444	63469.941	9047570.144	1023988.286	NA	NA	NA	21601	95436958.445	3284268.969	NA	23651389.551	NA	NA	NA	NA	23419626.343	59797062.548	NA	1434255796.437	85081.564	12471	NA	NA	1468	50233	9540558.523	3328	3932749.013	117826832.538	188980.399	157349.169	186553.665	5337816.668	4108.599	426724.08	111940.767	776536.782	269718.933	132739.294	930737.547
QC_plasma_5c	NA	NA	NA	NA	2282314	595372	NA	NA	NA	NA	NA	NA	1108885	342469	8921258	NA	NA	NA	86531841	NA	NA	60361	535599	80199	NA	NA	197845	NA	NA	NA	113683397	NA	NA	NA	NA	NA	NA	NA	NA	NA	NA	NA	NA	NA	NA	NA	NA	NA	NA
QC_batch-plasma_5e	NA	NA	NA	NA	NA	NA	NA	NA	NA	NA	NA	NA	NA	NA	NA	NA	NA	NA	NA	NA	6059	NA	NA	NA	NA	NA	NA	NA	NA	NA	NA	93214	NA	NA	NA	NA	NA	NA	NA	NA	NA	NA	NA	NA	NA	NA	NA	NA	NA
plasma-666-FMT_1	207011.756	502	12284	10204	1340984	326751	62170	5231255.874	187131019.879	76946.96	10329936.682	158595.73	1216323	166299	2861997	36586	82079239.672	3651679.818	37704109	24256548.212	9480	43987	186222	94886	32599389.622	71740368.018	279645	1047779815.358	106978.955	7050	96955398	60437	6568	40444	9188820.641	6650	3553099.722	112038971.142	198382.156	204214.478	180653.849	5461771.572	NA	574959.903	163256.728	914662.914	407484.72	146531.831	1074584.66
plasma-667-FMT-AKK-Pas_2	166321.37	77	11330	15306	2352619	375666	87750	4071245.62	87589975.621	34619.814	10970722.766	168182.173	885046	134179	2471826	62072	75144329.272	3237545.408	40917617	22010653.147	3717	18357	475075	115571	21582282.308	57618600.458	103275	1319477382.956	71058.122	6621	97391882	30815	10536	38414	7889210.936	7209	3986496.581	96617340.608	136698.037	83262.484	188618.265	5784259.644	NA	401475.06	90702.834	684305.828	242316.128	111027.902	634001.241
plasma-684-SPF_19	193272.377	259	7808	19372	2017799	344105	113553	8107429.848	125389783.081	NA	7750165.369	5903476.015	452709	119173	3626508	39845	91594879.249	2334224.58	17316274	21678084.836	6869	114216	311958	83806	24140004.888	52107665.622	101078	1722713088.186	80508.95	8083	96092055	33665	6931	65543	9780853.3	8539	4947141.858	102125258.535	170421.639	178451.338	213650.39	5771753.639	15818.286	596948.085	185586.597	881885.608	406746.678	141812.221	1135743.415
plasma-668-FMT-AKK_3	168038.797	290	7093	13846	1573294	241980	67924	5004553.831	73183126.186	57783.186	9880146.113	128372.344	591619	88361	4444963	35992	111559893.366	3041908.993	50635708	14900711.213	2121	21360	571414	124528	32457555.302	76283919.293	121734	1177671137.464	63048.623	7666	96236981	13094	6883	43630	8439301.039	6352	3797674.794	124931311.703	150787.356	172497.349	144321.394	5604345.865	6092.821	391882.715	110925.21	929874.638	301180.607	113997.804	977229.327
plasma-690-ATB_25	197447.903	443	6109	12255	1718967	458739	35743	7485905.888	5417603.522	87948.651	9365383.006	NA	501090	106057	3907749	26538	77028018.16	2638414.884	83049385	16488727.439	6363	21213	249816	124229	35638977.444	61076517.688	114912	1231240455.916	76946.085	7842	98103732	114990	6707	41549	8679619.74	7058	3787755.107	146816246.524	124941.464	124844.518	124992.358	5788377.746	7426.786	412127.04	117096.79	916021.858	379187.846	108481.926	1094498.294
plasma-681-FMT-AKK-Pas_16	183843.957	373	15548	17545	1981602	464246	61721	7629820.279	119217284.63	35696.319	10740742.876	234870.904	817809	174240	6086624	49420	88129295.958	3669155.751	42749435	24020594.695	2852	61633	840765	148494	31916189.543	78112668.753	202201	1170479119.92	92996.347	7812	98536325	39622	12503	65530	9908851.323	8596	4043762.049	108300065.325	165627.554	151217.226	182240.489	6055924.823	6973.323	407432.548	106935.543	814431.814	249914.053	129277.674	698328.326
plasma-670-FMT_5	211150.396	604	11462	8405	2224204	280141	29400	6516965.005	87325286.397	49504.01	13501426.907	194978.528	785217	129727	7408522	32013	67955541.627	3832230.527	66090067	21660213.718	2786	22710	261281	85346	17008038.865	68028980.838	93500	1776244051.877	68371.199	8613	94807177	26661	4911	89791	8095079.283	7943	4330179.279	149144604.063	19580.583	39614.963	47499.57	5649288.559	NA	159354.652	37659.689	762242.926	167382.349	99207.439	562814.259
plasma-685-SPF_20	179097.355	672	9537	27851	1874827	674490	139748	7021193.515	135464038.482	48104.763	10197976.372	4077178.42	345563	167369	4892737	58483	77613944.637	2861201.628	71930974	27143817.373	8573	38101	781061	110512	22851913.294	55666968.074	45336	1251611208.057	89532.624	8981	93271323	70256	10408	36654	9050077.481	8578	3705849.557	108774937.305	189804.957	75177.59	231988.744	5882146.244	23132.878	645210.766	97770.034	1152120.866	528839.702	137672.678	1317912.142
plasma-675-FMT-AKK_10	173260.631	631	9649	20924	1606524	362695	90806	6116215.359	76602242.278	86154.27	9746040.883	140712.677	407505	140429	8342453	45479	105972353.079	2946415.482	71165994	21046281.757	2735	29518	425944	104943	27256444.321	65264084.564	58144	1165545303.522	60742.633	7847	92221468	31753	11515	55225	9239627.819	8302	3898545.303	126836430.478	298641.258	172223.567	287772.523	5783983.442	12372.234	705166.379	118225.343	1056640.118	602977.783	134564.844	1350767.742
plasma-692-ATB_27	202959.359	422	6240	19906	1831244	835093	74844	7521366.959	4191464.825	73116.734	10842462.596	132836.661	1054057	213849	9318167	34044	98750066.858	3558498.614	97758121	22351777.346	20289	13968	233627	137472	32053261.238	89705554.772	291660	1432543022.993	74300.58	8323	95685420	267594	9105	46076	8291562.017	8641	3939794.234	122357866.531	223206.706	237774.784	211343.927	6168405.323	2269.111	610644.424	169461.572	1156913.926	466764.439	160582.267	1606860.842
plasma-683-FMT_18	182372.255	444	16983	19335	2383694	570726	75016	7682019.163	96351371.174	17397.455	11288958.011	225359.892	1003690	156138	9324375	79329	82459107.095	3783798.178	67210388	21911918.861	6457	23945	447308	114182	24095747.614	67735538.589	102965	1277431921.829	73532.764	7978	102025250	39835	14858	68421	8393851.224	10058	4282846.374	109996814.565	149072.546	142861.35	175122.105	5649900.844	3049.97	371991.252	86248.281	702414.63	276872.777	97992.961	748076.919
plasma-689-SPF_24	159103.35	577	7295	12057	1306992	266148	199519	5778916.583	69373868.474	NA	7669382.954	2549145.692	377202	118916	8595397	40609	129329869.079	2664210.786	17197380	16407254.371	1765	35518	244642	60149	41641029.952	58305878.27	118094	1112407685.573	84877.017	7901	96648458	11682	6440	46505	8364818.1	6663	4812936.193	72210576.416	259061.2	249656.546	220641.14	5772925.915	NA	578056.879	174927.903	1089367.744	423611.029	130974.53	1281970.117
plasma-680-FMT-AKK_15	180471.059	417	8358	13820	2065866	251330	104309	6395404.944	74882304.205	48984.068	8133772.112	176210.537	619078	140903	8935998	45252	106343589.492	2732939.553	59249396	16448171.677	3167	26089	409334	79164	35310184.657	50420210.03	75539	1391787820.926	108087.214	8651	94728703	19074	9218	40765	8217209.85	10003	4347611.969	120089529.36	235602.082	282481.079	164485.773	5758938.834	11066.279	439310.161	131224.299	814744.935	322679.608	148827.827	1100228.3
plasma-686-ATB_21	191507.511	484	7100	30212	1713011	649512	200034	6996195.849	3699515.58	140583.378	11119799.833	NA	685291	121943	7773138	46657	148402983.114	2739592.332	46633014	16959531.484	4596	2026	191898	101229	37676747.098	61686287.649	66083	1210432222.804	77028.586	8635	92294874	76772	8280	48954	9004389.805	8236	4539361.768	109732799.446	259401.302	281918.984	291039.143	5687996.073	24061.426	900564.131	230494.3	1588220.443	620213.195	205427.293	2065434.759
plasma-676-FMT-AKK-Pas_11	176114.999	351	12606	12228	2001130	457783	32983	7180836.116	112685559.214	48684.067	9457857.411	264267.809	599128	131502	8620007	32642	72242833.021	3738491.621	41690978	18719227.558	4129	43480	683604	131664	21906499.835	57527414.261	157217	1220367124.222	60853.948	8344	89929226	38006	9082	49388	9419442.681	8318	4056209.91	117054433.383	100713.931	55943.872	106408.826	5876458.75	NA	300811.994	76781.489	507849.758	189466.102	44767.377	495171.406
plasma-682-FMT_17	202980.007	571	14471	14199	1806513	455003	53993	6564324.367	112853596.772	61327.352	11016461.254	216233.066	627463	204155	12517155	43703	88621051.937	2893934.064	59266695	23579308.458	9995	58355	193099	75736	26054164.324	59066985.488	173124	1595224885.715	85631.511	7763	94344925	62280	10591	44510	9485452.228	10178	4221355.685	133525275.81	188815.718	169983.155	143508.075	5764933.583	7960.392	403144.316	114785.105	1192172.534	323086.492	128168.04	1300724.978
plasma-688-ATB_23	170316.333	307	295	16418	1918865	663715	55049	6797075.383	5694471.461	61661.345	8369978.676	167638.567	636332	122592	8965477	27562	84946846.128	2515560.838	75186491	17310688.946	8878	6022	205234	95582	27953256.6	79065828.38	135105	1779032221.391	72830.045	8917	94643136	138572	7263	43260	8121730.544	8198	4085385.067	120260202.762	129416.88	128856.095	124681.967	5987184.837	4996.099	423696.466	119874.968	951695.21	375604.727	118997.764	1167050.687
plasma-687-SPF_22	199841.676	638	8420	48027	2079661	718308	172376	7588401.096	46298572.641	67689.68	9860715.562	3000991.251	565634	187970	13171128	33795	116243856.572	2433612.464	54321024	25153817.433	5989	22551	317479	77368	42109248.098	61519270.789	187518	1445486447.199	96873.792	9609	93665645	29495	10421	46654	8593477.264	7371	4386869.401	114694525.756	248778.577	318603.522	311899.146	5988351.105	22920.821	914356.097	268795.382	1349958.032	555249.615	180099.69	1620507.224
plasma-679-FMT-AKK_14	184516.13	457	8735	15553	2039736	346852	101532	6103706.771	48356396.033	70533.766	7698956.657	133527.285	676063	99585	11794157	38115	102845698.019	2491969.504	97876807	16492362.16	2119	11158	676645	95095	34501478.963	62643510.204	89064	1027827084.334	85663.361	8705	71846149	32658	4822	78294	8392151.158	8428	3442893.161	126811835.131	180298.369	245445.444	151406.766	5557172.205	NA	380518.612	138379.705	903461.591	239225.221	149586.668	1186544.93
plasma-673-FMT-AKK-Pas_8	188080.702	462	13263	18773	2498437	216030	121949	8259372.374	25205102.28	46982.509	9050094.263	191392.329	798319	156873	8265153	69535	88093195.873	2887668.152	38283237	18719159.971	5381	7621	612784	106280	30047836.321	53643225.737	90131	1406113720.448	103467.287	8282	93923975	63277	12014	94980	9333305.046	9221	4062232.669	96692448.808	188315.071	252457.292	157028.905	6048049.941	2451.825	389854.169	120182.726	616620.519	291373.208	73548.606	753801.399
plasma-691-ATB_26	245554.474	426	7513	19907	2116109	684169	88610	8303191.061	9333795.638	76242.695	9446902.314	134021.399	790671	99848	9593301	36601	116832368.213	2826965.135	110379126	17795887.308	41025	5996	271588	119353	48617851.511	66621228.865	175300	1353611416.453	121726.055	8277	91052209	825732	10528	36528	8946431.511	8564	4013174.86	142910468.04	294113.328	328202.048	224046.573	5574416.254	15414.595	794575.453	185546.936	1560347.345	681884.282	204133.7	2272342.302
plasma-678-FMT_13	169462.173	456	13968	15514	1932567	607223	58657	7133731.113	135161907.335	25452.06	10342540.573	236967.073	769244	186228	12325813	78275	82821499.662	3871010.313	40116245	26852859.853	31437	42356	287554	82084	23680668.373	57416051.966	165514	1136651254.995	87491.085	9092	90662945	186070	19907	33460	9906298.119	9765	3681154.515	117589382.405	131531.776	140654.704	110862.978	5453458.005	2978.843	328527.781	77991.099	649777.105	240767.256	82754.053	637619.197
plasma-677-FMT-AKK-Pas_12	173031.272	526	14241	19706	1671199	418100	85410	6411945.244	93496720.487	49557.233	9975886.227	161516.699	518404	182731	12509519	52904	82900606.041	3636946.326	34511682	26247623.122	7205	26791	294968	75255	27009455.17	48795681.779	101680	1217940480.488	73677.411	9303	89410930	72515	9140	55515	8097242.267	8460	4241598.415	105419552.105	204759.165	159997.497	172270.706	5734346.828	7872.2	461850.63	131699.918	1003115.887	334392.799	145529.818	1103665.033
plasma-693-SPF_28	169969.925	521	7268	45690	2118157	553640	128530	6986895.498	103448808.11	94535.446	7980717.241	4699224.314	611785	201039	13798522	36549	145929018.99	2795438.199	22643237	17780555.222	2352	27361	593424	89811	35376262.829	48698455.337	111568	1422906135.749	84218.629	8721	97622663	8516	10155	38576	9244377.566	8567	3817769.494	122348906.435	241441.149	258335.436	178702.06	5638731.685	3241.434	471861.829	125591.132	1181762.792	368728.363	133848.284	1298464.696
plasma-672-FMT-AKK_7	245306.388	627	10763	16561	2038270	440683	71400	6271148.739	70198016.218	49943.437	9182763.792	173159.142	919186	195769	15086976	53324	82497796.895	3253114.93	98718541	23621285.153	2486	41121	590056	95549	34934010.705	72264030.047	118711	1278035768.806	77456.748	8610	92302411	34795	13337	79502	8763248.702	8216	3854965.566	113378873.955	134428.947	111487.725	111791.7	5524376.614	2618.256	318831.585	62930.683	876919.182	274824.299	104510.536	836712.247
plasma-694-ATB_29	245272.953	411	7325	18260	2479215	904548	79104	8370393.605	4928054.672	87987.331	8701715.712	149924.482	757282	159226	11859543	38166	99849302.024	3152749.603	40592318	18712131.448	15115	6344	292200	102707	40423723.361	58135695.469	198358	1655625805.886	80661.942	9490	91686167	531131	12402	35701	9145340.482	11303	4039329.335	130912714.564	285455.236	290335.135	231632.931	5498459.428	7218.586	800091.336	206459.028	1496318.795	688377.99	196291.806	1974928.167
plasma-671-FMT-AKK-Pas_6	172266.058	582	12838	17662	1994897	667840	130813	6371979.711	125141547.438	46962.391	9648414.854	164746.208	614334	161304	12105457	58977	99443155.925	3050811.114	52984503	23130978.178	3397	75507	656939	99333	24722482.684	55715903.86	146804	1243569605.97	65594.49	8882	94032686	10844	12367	43153	9083724.867	9005	4263469.136	115812462.23	177240.713	147341.761	212000.006	5312632.732	3825.739	565508.279	109495.218	935492.563	380311.49	124368.945	988914.307
plasma-695-SPF_30	190143.147	445	9052	17485	2103005	835646	91092	7315445.438	124994448.011	56885.401	9193321.48	5431620.789	799284	138140	11983340	37375	75262422.23	2770334.178	35353341	20199173.241	8245	68770	530146	75463	26034114.631	66387906.864	206330	1229827456.051	90485.549	9055	86479895	36761	9288	34670	8654874.146	7841	3769532.635	114789815.727	161787.217	134882.549	203489.208	6160936.835	9041.4	616332.798	131138.494	1107686.374	397920.961	201318.679	1296593.437
plasma-674-FMT-AKK_9	158669.984	502	9173	13966	1699645	521642	67350	5864857.622	89502025.266	61424.263	11643655.856	158304.95	904856	147151	13905608	44356	91682965.573	3156525.43	57429428	23004021.242	1884	39598	633554	89324	27990281.237	79442440.971	197265	1160446174.732	83643.951	8409	90276919	17752	6997	51294	9514047.602	8777	4159648.36	107293034.171	206443.733	129560.606	191078.035	6380383.791	2633.468	495139.239	78879.491	912400.068	415715.194	75349.225	971181.305
plasma-669-FMT_4	189307.101	742	12761	16503	1943343	569833	44259	7245685.881	131942349.589	58311.798	13420321.606	249563.374	1060097	301917	17009334	31878	83514416.185	4613964.395	154076219	28853028.916	8296	66423	399660	70706	27775559.627	94656688.656	259419	1254466799.971	75739.109	8318	89761007	63117	4768	51944	11913000.654	7417	4102590.811	148712120.752	70124.039	80850.371	100469.62	6232208.373	NA	309102.585	68061.301	1045531.71	183647.048	134243.445	846289.413
St_mix_pre	NA	280895	321764	258046	NA	NA	156251	NA	NA	NA	NA	NA	NA	NA	NA	79095	NA	NA	NA	NA	NA	NA	NA	NA	NA	NA	NA	NA	NA	124672	NA	NA	196828	5582	NA	186467	NA	NA	NA	NA	NA	NA	NA	NA	NA	NA	NA	NA	NA
St_BA1_pre	NA	NA	NA	NA	NA	NA	NA	NA	NA	NA	NA	NA	NA	NA	NA	NA	NA	NA	NA	NA	24807	NA	NA	NA	NA	NA	NA	NA	NA	NA	NA	42645	NA	NA	NA	NA	NA	NA	NA	NA	NA	NA	NA	NA	NA	NA	NA	NA	NA
St_AA_pre	NA	NA	NA	NA	61907	44610	NA	23015147.784	NA	NA	334895089.613	NA	17953857	17473	2471998	NA	NA	676083.869	6854079	NA	NA	11172	20799	23909	241273.072	162138802.742	2787829	18365213.064	39118.541	NA	132443151	NA	NA	NA	4711393.66	NA	4003737.639	NA	NA	NA	NA	5709023.663	NA	NA	NA	19671.629	NA	NA	NA
St_BA2_pre	NA	NA	NA	NA	NA	NA	NA	NA	NA	NA	NA	NA	NA	NA	NA	NA	NA	NA	NA	NA	19466	NA	NA	NA	NA	NA	NA	NA	NA	NA	NA	1625899	NA	NA	NA	NA	NA	NA	NA	NA	NA	NA	NA	NA	NA	NA	NA	NA	NA
St_mix_post	NA	NA	NA	NA	NA	NA	NA	NA	NA	NA	NA	NA	NA	NA	NA	NA	NA	NA	NA	NA	NA	NA	NA	NA	NA	NA	NA	NA	NA	NA	NA	NA	NA	66489	NA	NA	NA	NA	NA	NA	NA	NA	NA	NA	NA	NA	NA	NA	NA
St_AA_post	NA	NA	NA	NA	29236	285665	NA	NA	NA	NA	328871189.171	29546.921	17100680	27642	3694657	NA	NA	869942.664	21675180	21620.814	NA	2318	24853	11863	499026.254	159692850.409	4030978	NA	77056.342	NA	151415759	NA	NA	NA	NA	NA	NA	73730.587	3026.901	NA	NA	4253246.862	NA	NA	NA	8158.258	NA	NA	NA
St_BA1_post	NA	NA	NA	NA	NA	NA	NA	NA	NA	NA	NA	NA	NA	NA	NA	NA	NA	NA	NA	NA	57043	NA	NA	NA	NA	NA	NA	NA	NA	NA	NA	9101	NA	NA	NA	NA	NA	NA	NA	NA	NA	NA	NA	NA	NA	NA	NA	NA	NA
St_BA2_post	NA	NA	NA	NA	NA	NA	NA	NA	NA	NA	NA	NA	NA	NA	NA	NA	NA	NA	NA	NA	13119	NA	NA	NA	NA	NA	NA	NA	NA	NA	NA	1572331	NA	NA	NA	NA	NA	NA	NA	NA	NA	NA	NA	NA	NA	NA	NA	NA	NA
[truncated: 188 more columns]

## Sheet: Height
Sid	2-deoxycytidine@1.41-qppos	2-hydroxy-2-methylbutyric acid@3.49-sf	2-hydroxy-3-methylbutyric acid@4.61-sf	2-hydroxybutyric acid@2.50-sf	2-hydroxyglutaric acid@13.18-gc	2-oxoglutaric acid@13.19-gc	3-hydroxybutyric acid@1.67-sf	3-hydroxyglutaric acid@1.42-qpneg	3-indoxyl sulfuric acid@5.08-qpneg	3-methylglutarylcarnitine*@2.78-qppos	3-methylhistidine@0.98-qppos	3-phenylpropionic acid@10.51-qpneg	4-hydroxyproline@12.61-gc	5-aminovaleric acid@13.70-gc	5-oxoproline@12.54-gc	Acetic acid@1.79-sf	Acetylcarnitine@1.23-qppos	Acetylcholine@1.06-qppos	Alanine@7.03-gc	Allantoin@1.09-qpneg	Alpha-muricholic acid@6.01-ba	Anthranilic acid@13.61-gc	Arabinose@14.34-gc	Arabitol@14.98-gc	Arachidonic acid@20.31-qpneg	Arginine@0.98-qppos	Aspartic acid@12.54-gc	Azelaic acid@9.84-qpneg	Behenic acid@25.17-qpneg	Benzoic acid@9.73-sf	Beta-alanine@11.33-gc	Beta-muricholic acid@6.30-ba	Butanoic acid@5.30-sf	Cadaverine@4.75-pa	Capric acid@15.84-qpneg	Caproic acid@12.07-sf	Caprylic acid@13.51-qpneg	Carnitine@1.00-qppos	Carnitine C10:0@12.24-qppos	Carnitine C10:1@11.45-qppos	Carnitine C12:0@14.00-qppos	Carnitine C12:1@10.61-qppos	Carnitine C14:0(OH)@13.73-qppos	Carnitine C14:1@14.74-qppos	Carnitine C14:2@13.95-qppos	Carnitine C16:0@17.32-qppos	Carnitine C16:1@16.19-qppos	Carnitine C18:0@19.08-qppos	Carnitine C18:1@17.76-qppos
BlM_pre	NA	10	857	2197	10874	762	10004	12722.613	NA	NA	130848.003	NA	2600	3132	99784	4768	2752.566	NA	30963	1097.959	NA	10992	3691	1305	17548.995	153376.343	2716	1339839.351	5951.764	1228	60024842	NA	574	7053	868667.372	1074	447675.779	12309.891	NA	NA	NA	776648.985	NA	NA	NA	NA	NA	NA	NA
BlM_prea	NA	NA	NA	NA	NA	NA	NA	NA	NA	NA	NA	NA	NA	NA	NA	NA	NA	NA	NA	NA	431	NA	NA	NA	NA	NA	NA	NA	NA	NA	NA	1346	NA	NA	NA	NA	NA	NA	NA	NA	NA	NA	NA	NA	NA	NA	NA	NA	NA
BlM_post	NA	61	909	2488	2873	240	10844	11306.826	NA	NA	4701.341	NA	1147	3967	88525	5061	1302.033	NA	47805	2580.657	83	4868	3047	1472	23053.065	79940.15	1541	2389692.392	7062.473	1234	64246973	101	797	5341	855948.383	1144	429212.934	10442.631	1260.443	NA	NA	828770.291	NA	NA	NA	NA	NA	NA	NA
QC_plasma_4a	52626.217	3	4	10	NA	NA	47	467997.607	3550742.94	14358.615	1503802.966	153120.372	NA	NA	NA	2768	14537469.062	479610.27	NA	3615897.251	NA	NA	NA	NA	2855567.194	12347192.235	NA	232723244.632	7928.58	1090	NA	NA	95	7859	1195331.677	263	504902.932	27331106.825	26062.52	26805.425	19090.88	794331.852	NA	35692.528	17190.845	54246.57	23562.033	7909.173	53282.803
QC_plasma_5a	NA	NA	NA	NA	1157602	229999	NA	NA	NA	NA	NA	NA	838791	80893	1181465	NA	NA	NA	19397592	NA	NA	42962	294685	93384	NA	NA	155224	NA	NA	NA	74320882	NA	NA	NA	NA	NA	NA	NA	NA	NA	NA	NA	NA	NA	NA	NA	NA	NA	NA
QC_batch-plasma_5a	NA	NA	NA	NA	NA	NA	NA	NA	NA	NA	NA	NA	NA	NA	NA	NA	NA	NA	NA	NA	1701	NA	NA	NA	NA	NA	NA	NA	NA	NA	NA	12914	NA	NA	NA	NA	NA	NA	NA	NA	NA	NA	NA	NA	NA	NA	NA	NA	NA
QC_plasma_4b	40304.797	1	1	5	NA	NA	55	873881.928	3657170.97	11809.594	1598969.029	145333.928	NA	NA	NA	2598	14657629.765	552569.696	NA	3535122.044	NA	NA	NA	NA	3424382.558	10932437.524	NA	239551216.678	10401.627	1098	NA	NA	119	7712	1323799.459	341	480205.537	25434399	22607.843	23827.373	21145.832	841314.942	2850.027	35322.023	14567.739	66005.148	24915.036	10139.845	66607.907
QC_plasma_5b	NA	NA	NA	NA	1194081	284157	NA	NA	NA	NA	NA	NA	357390	118697	2599373	NA	NA	NA	19996147	NA	NA	35638	254829	100073	NA	NA	64592	NA	NA	NA	65716577	NA	NA	NA	NA	NA	NA	NA	NA	NA	NA	NA	NA	NA	NA	NA	NA	NA	NA
QC_batch-plasma_5b	NA	NA	NA	NA	NA	NA	NA	NA	NA	NA	NA	NA	NA	NA	NA	NA	NA	NA	NA	NA	1956	NA	NA	NA	NA	NA	NA	NA	NA	NA	NA	12795	NA	NA	NA	NA	NA	NA	NA	NA	NA	NA	NA	NA	NA	NA	NA	NA	NA
QC_plasma_4c	43923.01	2	6	8	NA	NA	78	901720.679	3603568.744	13030.093	1988592.323	181092.816	NA	NA	NA	2710	16553323.163	625761.718	NA	3559918.928	NA	NA	NA	NA	3180990.865	14180373.073	NA	249241851.309	16826.3	1333	NA	NA	148	7284	1338972.539	332	500819.421	24655039.598	26638.908	24510.567	19329.456	813378.603	1509.576	36236.878	19404.183	75387.256	26179.146	8191.981	68415.432
QC_batch-plasma_5c	NA	NA	NA	NA	NA	NA	NA	NA	NA	NA	NA	NA	NA	NA	NA	NA	NA	NA	NA	NA	1608	NA	NA	NA	NA	NA	NA	NA	NA	NA	NA	12138	NA	NA	NA	NA	NA	NA	NA	NA	NA	NA	NA	NA	NA	NA	NA	NA	NA
QC_plasma_6a	NA	NA	NA	NA	1298609	371847	NA	NA	NA	NA	NA	NA	439767	111214	4304132	NA	NA	NA	28713354	NA	NA	39215	271440	93749	NA	NA	77127	NA	NA	NA	63707960	NA	NA	NA	NA	NA	NA	NA	NA	NA	NA	NA	NA	NA	NA	NA	NA	NA	NA
QC_plasma_4d	35194.02	3	2	13	NA	NA	78	810733.616	3389808.155	12801.703	1484447.169	154313.83	NA	NA	NA	2711	13136707.905	460805.828	NA	3687555.62	NA	NA	NA	NA	2671926.395	11077305.112	NA	269637158.75	8165.527	1432	NA	NA	158	7447	1298446.533	378	497755.241	25991660.927	26404.037	20089.139	17776.578	831104.016	1082.366	33508.32	15204.502	66218.149	24016.85	8354.725	71322.582
QC_batch-plasma_5d	NA	NA	NA	NA	NA	NA	NA	NA	NA	NA	NA	NA	NA	NA	NA	NA	NA	NA	NA	NA	1520	NA	NA	NA	NA	NA	NA	NA	NA	NA	NA	12015	NA	NA	NA	NA	NA	NA	NA	NA	NA	NA	NA	NA	NA	NA	NA	NA	NA
QC_plasma_6b	NA	NA	NA	NA	1324654	390066	NA	NA	NA	NA	NA	NA	512252	154770	5048493	NA	NA	NA	38453699	NA	NA	40545	280513	107544	NA	NA	88906	NA	NA	NA	61550654	NA	NA	NA	NA	NA	NA	NA	NA	NA	NA	NA	NA	NA	NA	NA	NA	NA	NA
QC_plasma_4e	46706.152	2	6	9	NA	NA	76	845991.078	3584521.061	12851.276	1381429.334	167215.989	NA	NA	NA	2631	15016380.595	614351.805	NA	4387447.624	NA	NA	NA	NA	3174887.664	10906980.124	NA	266635628.543	8768.064	1360	NA	NA	118	7452	1417262.202	430	487609.932	27471008.593	23482.608	24399.927	22899.262	741802.949	1472.734	32633.663	15094.078	67366.899	22684.468	9142.621	63344.368
QC_plasma_5c	NA	NA	NA	NA	1041898	274282	NA	NA	NA	NA	NA	NA	527720	178493	3866500	NA	NA	NA	42861341	NA	NA	26883	262279	106432	NA	NA	75518	NA	NA	NA	67469498	NA	NA	NA	NA	NA	NA	NA	NA	NA	NA	NA	NA	NA	NA	NA	NA	NA	NA
QC_batch-plasma_5e	NA	NA	NA	NA	NA	NA	NA	NA	NA	NA	NA	NA	NA	NA	NA	NA	NA	NA	NA	NA	1384	NA	NA	NA	NA	NA	NA	NA	NA	NA	NA	12038	NA	NA	NA	NA	NA	NA	NA	NA	NA	NA	NA	NA	NA	NA	NA	NA	NA
plasma-666-FMT_1	47448.829	62	1128	1375	868261	203932	7590	486659.274	8666915.978	13851.203	1595716.556	24987.626	725719	112889	1251410	4524	12972344.322	631577.652	21474884	4542933.471	2636	35708	105653	65628	4357694.811	13534788.462	154023	190284995.274	13950.481	795	64190018	7707	520	5905	1254018.243	889	470106.538	26957891.114	24566.451	28315.659	22161.887	780022.929	NA	44410.912	20190.924	69004.017	37794.214	10682.433	66779.855
plasma-667-FMT-AKK-Pas_2	38112.296	16	952	2002	1490366	234871	10948	485982.544	4043140.462	7345.887	1925067.566	30872.958	519100	87052	1014677	7713	12833036.696	568175.167	27148594	3911901.244	702	19076	273697	76031	2913196.014	10966251.36	53890	229915450.815	7804.097	788	64491526	3859	786	4262	1115743.513	931	475821.401	21791500.913	18659.286	13552.598	21163.739	838919.233	NA	34734.32	10523.357	52133.309	20283.552	7887.217	39815.135
plasma-684-SPF_19	46403.59	33	715	2477	1276503	216568	14295	1105756.792	5534343.091	NA	1304916.098	951411.161	256323	84268	1440817	4611	14230740.655	399666.013	9786121	3905855.249	1639	72635	172633	61565	3613021.655	9711660.656	49734	317023582.478	10077.144	942	62563066	4413	562	9992	1437277.631	1081	641291.242	23282615.383	24922.202	27523.323	22993.885	821358.621	3151.676	49534.882	21663.874	65326.173	32762.102	10339.072	73503.68
plasma-668-FMT-AKK_3	38339.228	50	573	1824	960773	146385	8303	514896.269	3488600.831	10371.909	2085093.172	24497.746	332423	61629	1675653	4162	18435652.911	550679.537	30095176	2561147.354	306	14186	332415	101199	4489925.669	17201861.995	55750	227235491.368	7683.87	913	62488692	1588	460	6863	1250185.976	842	505472.912	27213663.288	21050.41	26850.667	17303.837	787421.272	1690.156	32773.083	14355.06	71853.607	23562.571	8435.872	65156.269
plasma-690-ATB_25	44536.528	49	582	1666	1023930	267340	4278	910158.064	240295.351	14628.567	1607646.99	NA	276245	70406	1498208	3238	12588506.691	465440.895	38191302	3041032.532	1347	11756	134327	96095	5520462.331	11492452.854	48250	226271195.475	9644.469	900	63901948	15173	517	6055	1238399.083	874	544048.82	34364635.359	18447.814	20461.469	12039.015	893166.468	2078.396	34981.484	14262.019	64705.072	33430.481	8148.263	87480.107
plasma-681-FMT-AKK-Pas_16	39172.265	40	1393	2256	1246513	293086	7392	865456.24	5358084.084	7411.291	1985307.974	32316.357	469208	111029	2101635	5837	14030496.692	622908.249	24039748	4278352.771	568	41365	480136	119109	4349821.101	16687016.06	96498	220129255.57	10329.179	908	64897636	5035	863	8732	1405212.727	1082	484619.606	24585262.887	25567.606	22401.84	20278.571	914488.005	1599.848	31446.414	11844.283	62075.575	20433.033	8874.786	46404.829
plasma-670-FMT_5	48470.506	77	981	1225	1391017	172768	3651	827802.067	4209251.967	9598.697	2337542.452	27781.137	454493	86446	2852383	3849	11040206.976	641363.475	38256102	3723215.775	1023	16849	147070	73355	2114059.77	12781087.999	42071	320003082.377	9281.156	972	61366815	3426	406	13609	1198012.654	1039	578006.007	33942301.573	4692.026	6538.895	9595.549	764458.835	NA	15762.929	5389.059	71950.264	15531.77	7759.65	43282.569
plasma-685-SPF_20	44478.392	69	898	3553	1150815	427685	16640	981793.888	6011732.466	10127.074	1840453.314	628839.622	187605	107085	1891965	6951	12850709.761	458983.235	32879270	4687245.077	2262	26493	446172	104520	3080552.351	11237425.755	18249	226547776.915	13081.619	1019	58911759	8908	790	6144	1254632.124	1124	489525.094	25256504.395	28673.023	13749.858	26896.761	848973.017	4279.386	45238.692	12515.996	94823.636	43162.888	10008.673	87277.759
plasma-675-FMT-AKK_10	40822.057	83	797	2823	948390	226412	11221	783223.034	3455911.062	15612.441	1818253.13	21771.26	222409	92424	2623814	5387	17812978.94	545845.927	48311280	3639168.377	394	15910	245361	87944	3631661.01	13877294.561	25487	210579802.955	6881.258	941	60562555	4121	741	7540	1384523.204	1138	529586.976	27853635.585	42335.14	25098.189	30620.705	820378.274	2823.536	45671.325	13777.337	73594.946	44524.613	10533.698	87327.315
plasma-692-ATB_27	42115.293	46	530	2610	1153469	539591	9027	891989.7	193833.511	12694.971	1925394.543	20816.481	604775	129988	3448933	3909	17675125.106	674240.799	63364847	3941103.309	3126	9160	128223	118551	4338623.191	17814301.524	144211	277958067.7	7544.917	1003	62815028	34690	637	6767	1224122.381	1095	493571.098	26758101.559	31759.331	34773.795	26716.123	834364.391	813.655	49723.889	17218.912	89154.046	38845.17	10696.018	119085.018
plasma-683-FMT_18	40914.832	45	1466	2398	1492654	350322	8937	990722.939	4222570.908	4463.378	2114641.582	34000.188	566293	106864	3501305	9668	13189416.661	758755.206	45266077	4041837.37	1878	18782	261020	99602	3226130.781	13520840.267	47715	224736607.497	8563.841	916	66070839	4999	1031	9876	1278819.995	1296	540646.609	24464049.265	22226.588	21518.506	19553.293	801372.537	1093.567	29893.476	12801.944	56634.768	20612.438	7335.451	57308.24
plasma-689-SPF_24	35780.103	65	656	1585	800730	165175	24649	710228.5	3009324.558	NA	1265836.51	426431.024	213609	73438	2970857	4267	19260826.835	498542.792	9432527	2965182.599	502	27734	138453	55444	6219151.557	10732352.643	56079	210875341.997	9288.415	886	64281979	1494	454	7196	1148296.603	813	602922.743	16186769.441	33303.659	35948.596	26533.663	819678.583	NA	47347.122	20368.418	88546.053	40816.837	10777.716	90493.325
plasma-680-FMT-AKK_15	40006.682	57	708	1814	1312594	160167	12820	804730.142	3263829.686	9069.679	1308448.574	27992.409	350454	87787	2793744	5178	15893877.892	493031.136	39443458	2968219.494	421	15826	226127	76086	4253502.025	9016477.67	33672	250847125.39	13748.519	984	61743032	2358	639	4819	1235434.788	1289	592946.711	26563913.78	32440.62	44102.996	19547.042	829264.289	1825.333	37031.041	16368.666	59645.076	25920.201	8660.61	73757.871
plasma-686-ATB_21	43993.424	62	624	3916	1046482	407278	24974	1001952.855	177829.543	21923.007	1751779.541	NA	389863	81360	2594315	4958	22412111.321	547921.316	25642694	2867883.038	1035	4131	108758	94273	4523245.386	11569720.728	29854	223808511.503	8060.781	1046	59581520	9886	561	6751	1143710.772	1062	591761.788	26306276.883	35901.501	42291.5	33107.409	802521.079	4650.304	74687.671	25677.295	110119.709	44912.92	14123.2	143081.107
plasma-676-FMT-AKK-Pas_11	35907.781	47	1046	1475	1240928	291440	3987	808187.701	5113848.55	9065.603	1457849.167	42055.842	328470	79471	3165872	3822	11592805.899	661277.545	23428221	3281357.159	701	27975	419833	127245	3156442.792	10306696.799	77035	219572221.564	8831.638	980	58024345	4926	625	7074	1321416.161	1079	475230.207	26150080.658	12486.901	10112.765	13884.848	845895.933	NA	24997.023	10269.342	49981.452	15633.457	5180.887	41176.727
plasma-682-FMT_17	43986.739	73	1222	1760	1084147	278806	6437	849883.478	5177584.402	12230.252	1878758.39	35956.059	340174	126502	4230215	5137	14242788.87	545165.962	41343835	4042295.04	2637	38389	105647	79665	3363084.29	10620224.769	81130	304700043.484	10284.333	885	62105101	8083	746	6365	1188054.955	1254	494733.243	31433558.522	24820.446	24023.175	15913.262	775574.76	1839.888	30852.892	14006.238	93492.808	25627.745	10359.12	99113.095
plasma-688-ATB_23	37015.89	34	46	2024	1186826	410644	6266	843913.36	245172.844	9275.574	1458955.984	26895.146	355184	69593	3109034	3289	13974642.767	437313.194	51843935	3046949.72	2088	5812	116262	88417	4078904.772	15046605.22	66635	316445300.316	10982.208	999	62424169	18287	497	5170	1282512.308	1050	572132.509	28247090.611	18789.7	20622.898	16372.792	902193.389	1374.448	33948.212	14485.598	69871.921	31464.533	7371.367	79123.391
plasma-687-SPF_22	46723.654	70	732	6020	1291374	465561	20315	957968.725	2048703.098	11445.498	1802117.568	440486.813	303632	125346	4301982	3865	17820899.669	411118.584	37387643	4250881.784	1167	17331	176820	78659	5691194.678	12702584.617	86701	265730518.185	10343.336	1132	62133714	3706	706	6092	1151695.034	961	557607.614	25797469.219	35725.604	45923.881	34455.314	854610.579	3965.799	81541.685	29268.711	98078.869	47211.456	12210.427	104150.747
plasma-679-FMT-AKK_14	39846.661	56	736	1877	1241596	217608	12131	732810.736	2206620.405	11884.224	1294982.127	21303.333	368851	64590	4744065	4310	16364277.769	452863.001	69045492	2888761.315	323	8822	374137	92789	4412080.378	11655679.059	36964	188493081.494	10211.834	963	46334280	4257	393	11309	1312836.996	1127	485314.141	29790333.007	25930.389	34290.48	18574.595	791051.768	NA	34858.023	18272.554	66558.058	19364.416	8336.252	83271.242
plasma-673-FMT-AKK-Pas_8	45734.45	60	1141	2355	1562261	134106	14485	1114455.085	1113112.168	7727.779	1556789.358	28006.857	448738	102563	3130598	7874	13959619.073	523914.435	20640347	3313202.803	679	6234	352608	108851	4231075.603	10063375.131	44167	257915966.711	16223.216	931	62264263	7856	1086	13007	1329854.907	1168	573605.787	21423465.592	27794.453	29731.975	18526.287	864813.025	878.706	31147.412	13882.567	47832.075	23637.239	7922.493	55475.634
plasma-691-ATB_26	51625.938	53	671	2517	1210671	387152	10448	1020357.909	424715.544	13827.855	1535767.335	20473.788	411069	65772	2732900	4445	19506874.547	536541.397	38889219	3284789.532	7318	6296	146153	129920	8015949.728	11791346.312	76176	244339204.422	13024.514	947	58696843	107060	701	5899	1187278.504	1091	540805.525	34586167.551	39221.129	44849.368	28727.394	764599.874	2313.035	65228.312	20585.075	117329.459	49453.842	12777.716	162072.954
plasma-678-FMT_13	38253.087	52	1165	2076	1222724	383364	6850	826940.948	6169023.977	5601.424	1724087.543	37856.121	414975	128134	3880295	9265	12913810.861	643774.32	23237072	4815559.125	7358	28673	157218	83894	3130025.793	11580599.086	79350	212902944.266	9249.16	1031	60296327	23908	1353	4980	1453564.114	1266	521641.534	27978549.415	17141.987	21569.986	13155.519	785653.784	1067.274	27194.896	10692.016	51594.459	22554.894	9674.471	45630.534
plasma-677-FMT-AKK-Pas_12	36896.007	51	1232	2371	1050385	260499	10150	750218.277	4390490.048	10072.574	1553047.582	26410.382	283732	115476	3752982	6240	13275897.554	630624.644	19834715	4802400.54	1451	17731	180760	84222	3832365.962	8999944.315	50798	243302799.533	10121.773	1006	58629371	9233	709	8077	1119793.365	1056	533779.711	24161699.765	25553.887	27475.459	19656.139	849157.627	1136.711	36932.771	18091.031	81178.137	29557.335	10075.8	78087.299
plasma-693-SPF_28	38586.553	58	631	5629	1346175	355743	15048	919862.013	4479318.989	15240.105	1444725.532	720340.837	348444	126760	4354427	4274	23617424.576	497122.476	12359474	2913976.742	492	21696	365621	104908	4972886.469	9704589.785	58140	266394923.541	8706.068	965	64844636	1106	729	6143	1251927.599	1093	471388.538	27350592.107	30972.665	36278.053	19445.752	805414.29	1161.762	36323.053	16605.027	93357.928	28503.878	10500.084	111247.701
plasma-672-FMT-AKK_7	52008.99	84	917	2056	1296176	274360	8499	789135.359	3333185.761	9844.148	1679684.165	27040.688	518382	133016	4968904	5979	13347669.88	609170.112	69130211	4045075.64	423	27654	332315	102955	5704609.576	14203125.051	57729	244283334.414	7593.297	1028	61476830	4379	939	11516	1337195.146	1080	546148.542	24737744.217	18036.975	17397.958	14822.819	843994.884	938.829	24993.502	9693.75	65133.564	22636.59	8922.862	54712.66
plasma-694-ATB_29	55483.2	52	647	2274	1624782	595837	9378	1043731.887	220989.518	15948.392	1388182.67	27395.521	428736	97210	4082170	4537	15949220.668	634468.991	23124765	3293637.173	3494	5261	163394	112735	5412697.988	10117184.32	103623	310698883.252	9650.808	1105	60770394	69720	868	5457	1353260.754	1426	551895.26	31114669.778	37564.612	38292.152	28090.354	771664.925	1442.22	55943.932	24888.422	100754.038	57726.387	13100.198	129388.224
plasma-671-FMT-AKK-Pas_6	36961.304	67	1164	2205	1241910	431888	15877	813457.212	5684660.601	8130.789	1526034.851	23747.007	345018	100343	3847777	6757	16289492.601	522118.516	29912683	4216755.884	1125	46230	368992	106761	3266800.355	10227691.619	73556	232757085.418	7230.267	1032	62328309	1418	817	6070	1204260.625	1115	601024.766	27544193.914	24878.101	20912.262	23053.292	735784.451	1371.682	41172.674	13446.077	68617.391	31394.605	12910.972	69637.987
plasma-695-SPF_30	40009.202	49	809	2153	1314780	527300	10746	974865.696	5714418.227	10537.367	1668018.174	830757.504	449837	88795	4342210	4379	12298049.789	475621.777	18681199	3803043.451	1520	41868	296318	83310	3412019.506	12865999.909	109403	230690679.657	12415.292	1062	57652114	4788	621	4613	1229055.356	980	523458.442	26540658.986	21850.442	20209.418	22296.06	914558.053	2144.062	44109.336	16175.268	78042.407	32004.636	13800.301	89850.273
plasma-674-FMT-AKK_9	35679.995	53	809	1883	1049604	333477	8395	657061.715	4164793.826	10164.501	1907917.336	25007.715	502163	97993	4340054	5026	14788949.121	629409.667	33885507	4366575.757	282	27415	362243	104809	4022138.543	16038660.764	93927	218964471.633	10186.303	965	59974190	2206	619	7677	1297476.81	1073	552147.942	24859263.473	25191.597	17854.113	22326.058	978838.96	943.852	37122.38	10307.791	69953.326	37124.777	6244.67	65689.037
plasma-669-FMT_4	46499.573	74	1079	2075	1124187	337130	5164	828816.972	5906431.778	10348.75	2502855.489	35664.119	537892	207167	5381030	3757	14168871.993	835883.436	68215648	5027848.337	2302	41530	222196	84811	3896921.492	19752187.388	112293	239209908.45	8542.219	936	56843638	8114	363	7909	1615001.759	928	513658.059	33765961.29	10441.274	12682.923	11315.814	858926.673	NA	25729.008	10137.854	79585.996	13822.281	10098.868	61699.23
St_mix_pre	NA	28549	27680	29906	NA	NA	21696	NA	NA	NA	NA	NA	NA	NA	NA	8077	NA	NA	NA	NA	NA	NA	NA	NA	NA	NA	NA	NA	NA	13178	NA	NA	13139	749	NA	23412	NA	NA	NA	NA	NA	NA	NA	NA	NA	NA	NA	NA	NA
St_BA1_pre	NA	NA	NA	NA	NA	NA	NA	NA	NA	NA	NA	NA	NA	NA	NA	NA	NA	NA	NA	NA	10267	NA	NA	NA	NA	NA	NA	NA	NA	NA	NA	1330	NA	NA	NA	NA	NA	NA	NA	NA	NA	NA	NA	NA	NA	NA	NA	NA	NA
St_AA_pre	NA	NA	NA	NA	33861	23021	NA	3044848.338	NA	NA	62249171.932	NA	11266361	11853	1287555	NA	NA	153575.648	4151468	NA	NA	10469	11718	9734	19660.44	32706025.799	1684538	1963397.3	4781.313	NA	91940587	NA	NA	NA	942587.953	NA	508953.987	NA	NA	NA	NA	777074.134	NA	NA	NA	7402.175	NA	NA	NA
St_BA2_pre	NA	NA	NA	NA	NA	NA	NA	NA	NA	NA	NA	NA	NA	NA	NA	NA	NA	NA	NA	NA	11512	NA	NA	NA	NA	NA	NA	NA	NA	NA	NA	209548	NA	NA	NA	NA	NA	NA	NA	NA	NA	NA	NA	NA	NA	NA	NA	NA	NA
St_mix_post	NA	NA	NA	NA	NA	NA	NA	NA	NA	NA	NA	NA	NA	NA	NA	NA	NA	NA	NA	NA	NA	NA	NA	NA	NA	NA	NA	NA	NA	NA	NA	NA	NA	9014	NA	NA	NA	NA	NA	NA	NA	NA	NA	NA	NA	NA	NA	NA	NA
St_AA_post	NA	NA	NA	NA	17267	178023	NA	NA	NA	NA	58179179.527	10616.687	9877102	17010	1753819	NA	NA	168495.484	14575924	4350.463	NA	1953	13922	16915	28858.075	31534200.685	2434602	NA	12615.059	NA	97993605	NA	NA	NA	NA	NA	NA	21491.505	1085.029	NA	NA	558313.616	NA	NA	NA	1770.117	NA	NA	NA
St_BA1_post	NA	NA	NA	NA	NA	NA	NA	NA	NA	NA	NA	NA	NA	NA	NA	NA	NA	NA	NA	NA	22483	NA	NA	NA	NA	NA	NA	NA	NA	NA	NA	1340	NA	NA	NA	NA	NA	NA	NA	NA	NA	NA	NA	NA	NA	NA	NA	NA	NA
St_BA2_post	NA	NA	NA	NA	NA	NA	NA	NA	NA	NA	NA	NA	NA	NA	NA	NA	NA	NA	NA	NA	3600	NA	NA	NA	NA	NA	NA	NA	NA	NA	NA	196057	NA	NA	NA	NA	NA	NA	NA	NA	NA	NA	NA	NA	NA	NA	NA	NA	NA
[truncated: 188 more columns]

## Sheet: AreaQCCorr
Sid	2-deoxycytidine@1.41-qppos	2-hydroxy-2-methylbutyric acid@3.49-sf	2-hydroxy-3-methylbutyric acid@4.61-sf	2-hydroxybutyric acid@2.50-sf	2-hydroxyglutaric acid@13.18-gc	2-oxoglutaric acid@13.19-gc	3-hydroxybutyric acid@1.67-sf	3-hydroxyglutaric acid@1.42-qpneg	3-indoxyl sulfuric acid@5.08-qpneg	3-methylglutarylcarnitine*@2.78-qppos	3-methylhistidine@0.98-qppos	3-phenylpropionic acid@10.51-qpneg	4-hydroxyproline@12.61-gc	5-aminovaleric acid@13.70-gc	5-oxoproline@12.54-gc	Acetic acid@1.79-sf	Acetylcarnitine@1.23-qppos	Acetylcholine@1.06-qppos	Alanine@7.03-gc	Allantoin@1.09-qpneg	Alpha-muricholic acid@6.01-ba	Anthranilic acid@13.61-gc	Arabinose@14.34-gc	Arabitol@14.98-gc	Arachidonic acid@20.31-qpneg	Arginine@0.98-qppos	Aspartic acid@12.54-gc	Azelaic acid@9.84-qpneg	Behenic acid@25.17-qpneg	Benzoic acid@9.73-sf	Beta-alanine@11.33-gc	Beta-muricholic acid@6.30-ba	Butanoic acid@5.30-sf	Cadaverine@4.75-pa	Capric acid@15.84-qpneg	Caproic acid@12.07-sf	Caprylic acid@13.51-qpneg	Carnitine@1.00-qppos	Carnitine C10:0@12.24-qppos	Carnitine C10:1@11.45-qppos	Carnitine C12:0@14.00-qppos	Carnitine C12:1@10.61-qppos	Carnitine C14:0(OH)@13.73-qppos	Carnitine C14:1@14.74-qppos	Carnitine C14:2@13.95-qppos	Carnitine C16:0@17.32-qppos	Carnitine C16:1@16.19-qppos	Carnitine C18:0@19.08-qppos	Carnitine C18:1@17.76-qppos
BlM_pre	NA	26.1	2351.436	20114.829	21615.458	843.995	194200.167	211040.338	NA	NA	808443.415	NA	3308.021	2761.419	285789.291	40684.329	9646.642	NA	33012.452	4315.53	NA	14945.463	5664.119	1820.184	254659.6	808675.495	4258.188	7681448.68	113576.079	13580.582	85018534.951	NA	14619.478	41038.304	7313950.753	13909.429	4912747.675	52770.399	NA	NA	NA	5631700.227	NA	NA	NA	NA	NA	NA	NA
BlM_prea	NA	NA	NA	NA	NA	NA	NA	NA	NA	NA	NA	NA	NA	NA	NA	NA	NA	NA	NA	NA	2163.38	NA	NA	NA	NA	NA	NA	NA	NA	NA	NA	10717.743	NA	NA	NA	NA	NA	NA	NA	NA	NA	NA	NA	NA	NA	NA	NA	NA	NA
BlM_post	NA	476.617	10035.346	19887.445	3950.589	416.905	95985.311	67492.678	NA	NA	29704.345	NA	1488.81	9753.169	278502.008	45296.685	3657.7	NA	74108.103	15085.26	318.367	665.827	4330.054	1431.583	349307.375	490603.587	2210.963	20215385.52	46985.603	10988.122	90943740.665	948.154	12765.31	36057.387	6099812.708	9164.119	3227197.852	50817.35	4472.961	NA	NA	6065009.663	NA	NA	NA	NA	NA	NA	NA
QC_plasma_4a	211406.491	8.732	10.17	47.473	NA	NA	490.944	6547297.437	78849112.22	70266.581	9077637.018	1008392.166	NA	NA	NA	21402.341	91310640.756	2862000.78	NA	20872885.325	NA	NA	NA	NA	23591846.224	62125054.316	NA	1359280999.974	81028.783	11168.432	NA	NA	1866.679	54162.558	9217781.368	2519.202	3640516.357	116019036.863	189858.594	145111.132	169498.39	5486214.138	NA	427359.621	133384.378	780021.317	288055.866	104509.562	912548.121
QC_plasma_5a	NA	NA	NA	NA	1883217.622	376784.191	NA	NA	NA	NA	NA	NA	1301289.911	104695.185	2527689.967	NA	NA	NA	28359861.113	NA	NA	65121.828	528943.452	146465.812	NA	NA	260013.845	NA	NA	NA	111777881.16	NA	NA	NA	NA	NA	NA	NA	NA	NA	NA	NA	NA	NA	NA	NA	NA	NA	NA
QC_batch-plasma_5a	NA	NA	NA	NA	NA	NA	NA	NA	NA	NA	NA	NA	NA	NA	NA	NA	NA	NA	NA	NA	8266.327	NA	NA	NA	NA	NA	NA	NA	NA	NA	NA	98870.795	NA	NA	NA	NA	NA	NA	NA	NA	NA	NA	NA	NA	NA	NA	NA	NA	NA
QC_plasma_4b	169484.575	3.172	3.315	25.758	NA	NA	389.072	6721313.302	81090269.716	60745.333	9697316.24	979772.236	NA	NA	NA	20444.505	93735835.078	3182411.242	NA	20184301.901	NA	NA	NA	NA	24740193.558	60296527.398	NA	1299368450.728	77656.958	10088.832	NA	NA	1530.092	55326.714	9561754.452	2480.936	3370602.959	114630641.738	172872.403	174781.409	191057.545	5473845.457	7906.358	422173.427	116657.262	864203.659	268059.979	131494.684	1003442.071
QC_plasma_5b	NA	NA	NA	NA	1978336.667	468575.498	NA	NA	NA	NA	NA	NA	757952.382	209813.003	6277866.282	NA	NA	NA	43627529.915	NA	NA	55152.532	478147.787	108005.714	NA	NA	164745.123	NA	NA	NA	105637865.891	NA	NA	NA	NA	NA	NA	NA	NA	NA	NA	NA	NA	NA	NA	NA	NA	NA	NA
QC_batch-plasma_5b	NA	NA	NA	NA	NA	NA	NA	NA	NA	NA	NA	NA	NA	NA	NA	NA	NA	NA	NA	NA	8208.822	NA	NA	NA	NA	NA	NA	NA	NA	NA	NA	98955.814	NA	NA	NA	NA	NA	NA	NA	NA	NA	NA	NA	NA	NA	NA	NA	NA	NA
QC_plasma_4c	192405.132	11.797	26.91	43.766	NA	NA	514.643	6501522.824	80025112.931	65244.615	10811534.398	1073895.466	NA	NA	NA	21604.776	99121317.285	3535265.496	NA	19835558.505	NA	NA	NA	NA	23540314.062	68462913.804	NA	1361142973.876	104573.061	11270.13	NA	NA	1747.714	57205.959	9065423.839	2346.924	3763740.846	113877423.123	191843.909	154958.055	132342.994	5704305.053	7364.463	431712.313	142713.251	882375.887	304647.048	125120.332	975616.693
QC_batch-plasma_5c	NA	NA	NA	NA	NA	NA	NA	NA	NA	NA	NA	NA	NA	NA	NA	NA	NA	NA	NA	NA	6596.283	NA	NA	NA	NA	NA	NA	NA	NA	NA	NA	93794.582	NA	NA	NA	NA	NA	NA	NA	NA	NA	NA	NA	NA	NA	NA	NA	NA	NA
QC_plasma_6a	NA	NA	NA	NA	2162514.81	594862.602	NA	NA	NA	NA	NA	NA	948465.326	190171.907	11876314.652	NA	NA	NA	63285149.714	NA	NA	62266.407	495911.934	89529.258	NA	NA	170014.548	NA	NA	NA	102090668.04	NA	NA	NA	NA	NA	NA	NA	NA	NA	NA	NA	NA	NA	NA	NA	NA	NA	NA
QC_plasma_4d	168717.15	11.211	9.822	76.514	NA	NA	556.576	6542890.953	75020059.8	70044.511	9252102.688	962662.563	NA	NA	NA	21875.461	82527787.683	2668376.583	NA	20234580.791	NA	NA	NA	NA	22402729.117	60312801.749	NA	1394000448.094	67771.466	12077.503	NA	NA	2193.168	49497.972	8754174.613	2878.384	3842922.171	112250036.471	176340.006	138146.595	155552.787	5662868.334	10438.414	401326.651	136100.58	824790.158	263508.285	89083.217	978987.586
QC_batch-plasma_5d	NA	NA	NA	NA	NA	NA	NA	NA	NA	NA	NA	NA	NA	NA	NA	NA	NA	NA	NA	NA	5941.728	NA	NA	NA	NA	NA	NA	NA	NA	NA	NA	93424.75	NA	NA	NA	NA	NA	NA	NA	NA	NA	NA	NA	NA	NA	NA	NA	NA	NA
QC_plasma_6b	NA	NA	NA	NA	2093865.886	607591.449	NA	NA	NA	NA	NA	NA	783706.444	220274.535	16297600.156	NA	NA	NA	50813006.119	NA	NA	57641.896	474981.77	87067.287	NA	NA	157295.843	NA	NA	NA	91740370.167	NA	NA	NA	NA	NA	NA	NA	NA	NA	NA	NA	NA	NA	NA	NA	NA	NA	NA
QC_plasma_4e	209499.882	5.897	40.718	58.169	NA	NA	514.048	6566256.569	78089997.977	65011.788	9251904.204	1021394.431	NA	NA	NA	21624.725	97045852.242	3114758.9	NA	23492601.297	NA	NA	NA	NA	23266792.911	61661089.717	NA	1416314418.087	79366.636	12543.811	NA	NA	1489.058	50339.224	9385931.984	3365.008	3786871.285	117249513.057	186620.906	164754.275	191821.795	5382352.723	12764.542	437591.247	121862.529	799098.597	288075.376	127809.337	927030.398
QC_plasma_5c	NA	NA	NA	NA	2196703.734	581419.78	NA	NA	NA	NA	NA	NA	928195.736	294893.725	9993362.573	NA	NA	NA	72028805.38	NA	NA	58391.719	507937.723	84404.99	NA	NA	175429.138	NA	NA	NA	107691750.668	NA	NA	NA	NA	NA	NA	NA	NA	NA	NA	NA	NA	NA	NA	NA	NA	NA	NA
QC_batch-plasma_5e	NA	NA	NA	NA	NA	NA	NA	NA	NA	NA	NA	NA	NA	NA	NA	NA	NA	NA	NA	NA	6451.477	NA	NA	NA	NA	NA	NA	NA	NA	NA	NA	94554.567	NA	NA	NA	NA	NA	NA	NA	NA	NA	NA	NA	NA	NA	NA	NA	NA	NA
plasma-666-FMT_1	203322.022	389.825	7800.068	10647.579	1335005.69	325846.709	80640.45	6218924.441	187955717.431	75221.244	10114203.918	159731.418	1191300.046	163417.415	2900207.817	37179.085	80792691.881	3839209.011	36904368.055	24720625.216	8974.659	43816.817	185071.515	95454.527	33205414.323	69689147.104	275742.543	1085550793.475	130092.686	7677.588	96343821.511	59688.474	8091.765	40756.138	9621084.981	7819.468	3951751.321	112560236.38	200751.641	195529.49	175961.613	5419053.135	NA	561456.992	150666.525	890238.834	382902.872	151867.651	1078645.186
plasma-667-FMT-AKK-Pas_2	163515.356	63.456	8004.757	15812.426	2366712.714	377060.283	107069.61	4615326.47	87869774.026	33884.795	10753836.676	169054.794	909983.965	137351.136	2428389.053	62840.27	74029508.46	3394629.722	42107235.495	22315277.596	3531.442	18452.37	479026.926	114651.782	21872538.108	56058755.892	105233.446	1353807174.596	81889.716	7067.314	98219184.792	30458.068	12359.157	38618.767	8156676.063	8160.076	4306121.992	97042568.88	138242.246	79908.438	183980.007	5741448.859	NA	392549.051	84070.879	667005.488	228463.303	114849.209	636267.551
plasma-684-SPF_19	190205.299	225.295	6078.644	19831.801	2049689.841	347468.189	131061.946	8814418.069	125656625.773	NA	7606033.919	5923875.156	486970.527	126712.678	3461574.767	40199.788	90316774.394	2440548.661	18669458.789	21877605.998	6549.42	115780.484	318817.245	82067.257	24355921.053	50780368.921	106188.266	1752460495.083	88494.061	8472.064	98249922.077	33302.083	7775.824	65745.626	10000648.608	9336.667	5208113.547	102547767.294	172230.957	171684.856	208707.399	5731583.599	6100.188	584462.205	172800.595	860908.736	384847.361	146396.213	1139559.831
plasma-668-FMT-AKK_3	165548.901	264.89	6028.302	14058.612	1611789.537	245635.511	74555.58	5245338.096	73270619.193	56705.423	9708565.614	128621.47	662040.265	97125.068	4137190.374	36199.866	110106470.22	3171022.024	56863171.585	14977637.394	2029.551	21812.702	590897.311	120567.637	32620405.109	74468999.761	131350.604	1189057889.292	66490.376	7903.725	99588682.404	12963.364	7416.97	43679.132	8545372.865	6731.406	3909003.366	125413591.791	152280.794	166385.565	141202.933	5567937.1	2504.008	384227.99	103776.511	909216.746	286020.079	117432.975	980293.468
plasma-690-ATB_25	194738.124	422.785	5617.501	12351.688	1774411.605	467861.135	37502.042	7602545.108	5419733.698	86429.072	9214728.756	NA	580840.234	120081.045	3556338.341	26616.93	76098595.471	2741919.855	96713947.354	16516686.56	6109.056	21805.358	261061.188	119066.67	35697711.088	59730176.683	126977.958	1235144683.074	78303.526	7966.484	102614932.697	113929.455	6970.475	41524.888	8715362.801	7272.355	3823935.004	147340823.676	126086.553	120744.336	122490.206	5753559.061	3260.71	404669.575	110093.945	897168.095	361485.226	111504.643	1097674.774
plasma-681-FMT-AKK-Pas_16	181529.224	369.517	15288.213	17572.721	2059570.209	475492.528	62319.548	7543675.948	119182870.529	35130.402	10582215.815	234760.899	978646.427	202635.21	5427840.67	49449.493	87153801.425	3800922.849	51445797.239	23990725.802	2747.967	63731.486	886993.93	141026.528	31877615.988	76532423.702	228295.912	1167760800.26	91809.627	7836.755	104071608.688	39288.454	12600.156	65396.176	9878990.377	8647.82	4015628.337	108654814.125	167018.857	146657.322	178892.683	6022515.621	3278.377	400667.58	101056.931	799048.768	239195.126	132576.708	700186.386
plasma-670-FMT_5	208738.655	619.497	11995.489	8369.25	2325136.85	287959.458	28643.823	6300755.186	87250405.031	48791.939	13320634.488	194707.304	965291.204	154323.241	6494125.153	31961.475	67273225.896	3956797.757	81774375.637	21580280.775	2693.972	23601.452	277869.161	80429.294	16947032.45	66780043.505	107506.012	1764014655.019	65811.191	8539.739	100957152.554	26458.035	4809.43	89497.062	8022807.169	7815.146	4241274.393	149587461.679	19729.648	38530.381	46707.779	5621025.306	NA	156953.918	35777.79	749178.295	160860.307	101500.023	564171.766
plasma-685-SPF_20	177486.883	729.301	11046.66	27470.166	1977991.733	697275.817	128467.268	6569972.718	135235445.162	47559.84	10090445.765	4066020.215	443359.259	206387.173	4173488.87	58179.5	77000520.199	2934080.644	93012002.528	26946963.855	8349.193	39913.43	841299.542	102874.277	22690820.984	54861784.429	53655.209	1234702624.902	83052.492	8736.58	100622197.815	69834.458	9728.583	36468.439	8891695.471	8139.953	3557545.769	109028824.633	190940.225	73554.407	228942.539	5858994.164	13506.946	637555.206	93907.44	1136564.965	512568.315	140168.183	1320411.019
plasma-675-FMT-AKK_10	171919.893	700.172	11630.775	20560.971	1700578.311	375722.87	81592.189	5661098.294	76451781.951	85314.278	9657595.786	140264.477	530993.789	175437.291	7046095.886	45179.191	105251643.082	3010845.199	93504937.237	20868703.52	2673.122	31011.605	460918.329	97256.214	27032896.31	64451405.144	69537.981	1147235463.947	55655.701	7576.536	99959882.596	31588.115	10568.067	54910.505	9051660.664	7766.854	3717526.645	127090990.998	300176.81	169020.703	284519.791	5764399.199	7789.084	697964.682	114197.178	1044358.875	586987.618	136659.923	1352970.097
plasma-692-ATB_27	201646.882	476.97	7774.687	19500.077	1943561.59	866502.164	65987.147	6908603.646	4182417.932	72520.898	10760226.919	132371.736	1390390.219	269924.661	7808964.634	33779.97	98188876.355	3623368.481	130076161.269	22144601.124	19900.868	14708.314	253734.414	126955.171	31764464.412	88771713.722	351712.686	1407830391.932	67491.341	7986.35	104101680.573	266420.673	8230.179	45792.614	8106371.404	7989.139	3739219.551	122562920.436	224164.781	234076.139	209347.029	6150957.755	1541.786	605431.763	164625.829	1145673.184	456404.231	162667.588	1609048.54
plasma-683-FMT_18	181428.137	509.353	21732.509	18893.392	2534507.548	592861.271	65134.919	7022817.842	96131825.01	17283.94	11220406.063	224527.247	1335217.965	198489.883	7772035.69	78639.37	82083994.039	3838881.605	90214563.254	21697552.725	6356.119	25253.976	487034.917	105190.434	23866601.934	67170826.238	124878.781	1254177822.637	66436.932	7617.017	111285825.528	39692.547	13266.676	67980.189	8196048.636	9211.088	4052983.588	110144265.285	149584.237	141080.718	173797.086	5637112.063	2238.855	369448.647	84273.598	696949.327	271945.287	99009.706	748891.622
plasma-689-SPF_24	158486.784	669.28	9522.099	11759.751	1391238.07	276662.135	171281.968	5271902.881	69212085.272	NA	7634516.449	2539506.514	504411.499	151834.033	7140688.102	40227.72	128889495.969	2693172.111	23207683.419	16242990.211	1743.636	37495.969	266782.75	55329.658	41235777.855	57941854.617	143732.071	1091686551.104	76503.94	7515.465	105588007.771	11649.679	5698.118	46198.782	8163126.751	6058.948	4548726.489	72282977.231	259726.126	247325.04	219391.077	5763147.75	NA	575098.589	171923.086	1083020.706	417958.515	131989.814	1283014.406
plasma-680-FMT-AKK_15	180008.127	487.828	11077.757	13459.985	2200003.785	261330.684	88765.633	5835587.017	74708092.882	48825.647	8109292.872	175545.818	829570.172	180220.069	7413871.028	44802.859	106103923.129	2752555.404	80126896.747	16283890.347	3139.851	27552.483	446654.686	72777.912	34967363.73	50211758.496	92066.863	1365924113.463	97448.703	8205.272	103555755.221	19036.676	8098.992	40496.381	8019546.459	9046.665	4109502.329	120169163.139	236001.921	280733.267	163868.732	5752484.496	9496.389	437821.686	129728.866	811601.745	319824.946	149589.977	1100821.074
plasma-686-ATB_21	191268.044	569.368	9504.926	29397.425	1823825.523	675262.108	169254.64	6398144.147	3691119.588	140361.703	11103484.256	NA	917331.258	155831.713	6453415.977	46177.568	148239958.344	2749153.918	62996579.291	16794276.188	4572.891	2139.231	209328.519	93091.071	37319876.97	61561918.058	80484.673	1188485211.275	69623.701	8174.739	100862850.99	76684.008	7241.532	48636.811	8793039.5	7422.089	4296680.794	109768241.495	259615.667	281067.877	290506.766	5684889.673	22333.331	899076.392	229210.932	1585232.626	617534.17	205939.103	2065976.787
plasma-676-FMT-AKK-Pas_11	176357.591	414.193	16970.233	11892.098	2125605.462	475242.007	27818.953	6628839.171	112456617.166	48768.661	9473147.781	263397.146	793313.82	166516.59	7206361.729	32300.208	72330242.212	3724189.46	55691842.27	18555873.272	4137.666	45816.977	743282.107	121458.583	21720674.629	57655284.93	190076.336	1200541842.839	55590.155	7890.989	97952596.7	38024.133	7922.638	49095.1	9221294.024	7481.101	3861548.315	117012854.476	100622.447	56130.27	106623.377	5879991.501	NA	301359.655	77254.58	508902.901	190370.566	44644.992	495028.485
plasma-682-FMT_17	203524.929	672.42	19409.264	13813.723	1914996.78	471762.43	45635.676	6099458.323	112643032.987	61535.074	11051176.34	215578.79	823033.702	256472.609	10527551.234	43251.03	88830013.547	2872410.003	78403570.329	23390290.143	10051.785	61383.431	209366.895	70055.237	25851146.282	59322971.604	207977.693	1571411806.449	78804.969	7346.613	102467658.921	62360.323	9254.657	44264.268	9302062.563	9165.998	4034952.826	133432913.68	188481.812	171087.992	144072.183	5771685.602	9338.782	404575.085	116166.627	1196992.412	326097.267	127486.484	1299993.864
plasma-688-ATB_23	170993.693	360.021	392.711	15983.747	2028878.516	687066.757	46728.66	6362279.758	5684908.083	61970.8	8409056.573	167181.976	824753.846	152468.394	7598113.804	27284.207	85243551.176	2487910.852	98245640.644	17185746.267	8960.359	6320.424	221733.009	88716.733	27757142.578	79573653.583	160998.897	1755112707.956	67583.096	8450.616	102418366.562	138863.414	6368.494	43042.054	7980269.429	7402.661	3922659.325	120137067.502	129078.196	130097.966	125408.243	5997569.357	6328.645	425924.573	122017.139	957397.095	380798.256	118062.128	1166079.656
plasma-687-SPF_22	200891.789	743.882	11093.357	46802.113	2191928.554	742118.809	147193.368	7159109.825	46230068.577	68138.596	9921550.032	2993789.524	722380.842	230895.928	11267953.038	33466.663	116780271.103	2398354.741	69908584.238	24993811.974	6066.168	23603.474	341495.588	72116.205	41848882.913	62041537.92	221238.65	1428351643.248	90698.459	9124.158	100906195.681	29581.034	9181.157	46444.282	8461482.161	6680.54	4232568.14	114539486.379	247919.279	322664.222	314300.339	6002069.449	31319.146	920710.459	275155.924	1360647.768	565409.477	178232.267	1618727.116
plasma-679-FMT-AKK_14	185718.086	528.735	11349.504	15176.087	2142160.638	357554.269	87392.084	5805245.454	48294793.753	71113.749	7757844.414	133251.377	849141.184	120624.454	10197811.468	37763.273	103433983.474	2447319.345	123816168.895	16402006.422	2153.976	11642.513	724224.387	89065.441	34317749.117	63303032.138	103902.727	1017329385.2	80940.904	8287.373	77008329.004	32779.863	4275.516	77985.74	8281060.372	7676.496	3338381.844	126599500.228	179527.153	249326.914	152852.169	5572948.299	NA	383797.485	142447.843	912333.123	244660.011	147667.489	1184930.367
plasma-673-FMT-AKK-Pas_8	189538.177	529.592	16948.567	18346.619	2613310.876	222138.093	105970.332	7918743.604	25178125.649	47442.158	9132450.244	191060.05	984016.743	187034.78	7232718.23	68933.908	88692592.759	2826260.224	47498879.394	18632968.959	5489.374	7924.09	652206.284	100080.63	29913357.896	54315326.465	103819.223	1394039402.595	98654.017	7909.327	100097828.075	63564.705	10734.133	94665.185	9229405.373	8448.758	3958388.478	96499997.26	187357.812	257210.759	158812.719	6068467.944	3883.137	393851.217	124394.8	623825.69	299259.746	72428.125	752582.106
plasma-691-ATB_26	247753.062	483.188	9420.121	19489.513	2203242.598	701508.379	77841.821	8021650.317	9325612.547	77104.672	9546240.412	133830.792	953947.915	116921.855	8510411.397	36309.012	117750791.573	2757661.229	133959307.759	17728745.312	42000.872	6209.624	287221.148	113084.644	48439560.657	67586014.685	199021.541	1344083622.857	117068.085	7932.791	96406993.984	830160.13	9488.865	36430.468	8864776.014	7900.118	3928950.694	142582066.271	292387.619	335348.2	226988.068	5596152.779	26213.396	803989.908	193076.186	1581419.952	703240.711	200546.877	2268098.55
plasma-678-FMT_13	171371.601	504.812	16766.663	15250.801	1991507.588	618644.122	52831.487	6981563.203	135087827.6	25814.291	10479431.496	236756.364	884636.852	209453.402	11274228.289	77770.492	83640712.114	3752100.156	46336691.643	26789489.319	32415.336	43474.497	299789.148	78852.293	23626350.738	58463161.798	181916.47	1131643826.535	85383.178	8785.512	94603603.548	187371.837	18305.042	33414.235	9849686.288	9149.17	3632673.773	117249821.797	130562.402	144515.068	112695.639	5480201.374	5806.324	333428.13	81989.769	660826.742	250283.871	80930.432	636122.722
plasma-677-FMT-AKK-Pas_12	175171.153	574.62	16691.34	19415.035	1712499.16	424478.992	77985.972	6304729.559	93456641.89	50331.455	10120821.685	161404.368	580755.504	201042.945	11635096.552	52607.439	83800553.178	3514575.955	38800574.64	26199167.556	7455.783	27364.477	305126.513	72838.397	26960991.484	49772739.687	109794.871	1213742238.458	72285.482	9029.761	92556206.41	73081.661	8497.108	55474.134	8061030.558	7994.215	4197847.615	105085658.807	203104.36	164820.952	175397.156	5765202.103	16370.405	469413.162	139125.258	1021843.786	348919.335	142015.604	1100823.884
plasma-693-SPF_28	172251.022	561.743	8320.286	45114.807	2157617.549	560014.918	118951.551	6891485.754	103412648.435	96138.392	8106554.998	4696559.289	666643.158	216093.03	13062841.28	36374.436	147648034.914	2693568.684	24740178.623	17753785.814	2442.567	27802.685	608812.529	87621.733	35324496.156	49756977.204	118236.872	1418905567.221	82919.001	8502.368	100208240.026	8589.518	9543.402	38570.791	9210653.897	8163.611	3785629.421	121928655.664	239325.488	266793.244	182222.373	5671647.587	7171.477	480247.928	133289.301	1205711.905	386133.565	130346.238	1294839.599
plasma-672-FMT-AKK_7	248845.371	666.598	12014.205	16391.23	2062947.052	443984.657	67041.266	6193161.105	70175683.936	50853.89	9338424.174	173069.763	972116.295	205205.914	14557564.211	53116.764	83542402.458	3125917.127	104586629.166	23588916.19	2590.957	41552.575	599987.36	94023.967	34887482.345	73953061.628	123290.375	1274765030.391	76368.131	8434.028	93888992.21	35123.889	12679.936	79533.354	8734148.502	7899.943	3825417.788	112960497.684	133163.722	115414.234	114159.58	5559033.046	6145.478	324923.786	67084.473	896027.663	288786.736	101575.425	834202.658
plasma-694-ATB_29	249045.451	430.819	7971.448	18115.879	2492902.602	907642.272	75363.524	8258473.87	4926368.251	89697.592	8858988.975	149841.24	776930.064	162692.76	11667300.07	38051.883	101197146.586	3021556.717	41678976.924	18684550.235	15809.46	6374.376	294439.891	101953.738	40365811.025	59584781.318	201822.871	1651068478.052	79443.121	9340.488	92403866.413	536586.831	11929.401	35733.069	9112676.926	10967.114	4006034.668	130397996.777	282593.145	301244.022	236864.782	5535224.541	17918.976	816392.857	221011.674	1531088.753	725707.337	190422.757	1968616.559
plasma-671-FMT-AKK-Pas_6	175070.123	601.565	13623.378	17564.013	1992374.532	667316.098	126438.954	6265255.001	125087813.867	47928.557	9832979.447	164631.439	610728.397	160507.551	12151006.776	58853.137	100863701.673	2916682.006	52663806.462	23088204.636	3565.778	75424.161	655787.154	99501.177	24678048.188	57186040.461	146220.946	1239275839.158	64353.206	8783.522	93864342.176	10964.289	12034.22	43210.512	9043033.486	8816.281	4219419.329	115330836.167	175361.4	153204.352	217068.62	5350216.926	10009.492	577703.747	117675.822	958503.1	402161.358	120438.741	985571.403
plasma-695-SPF_30	193397.106	453.697	9372.171	17428.149	2085322.8	831281.024	89296.42	7148368.103	124921042.039	58115.932	9378222.409	5426445.745	768494.816	133651.494	12287476.937	37329.03	76392685.923	2642481.22	33949642.53	20148099.483	8685.589	68268.067	523973.609	76319.727	25970132.583	68230038.887	200922.569	1224022923.443	88151.587	8996.094	85451933.755	37198.967	9140.869	34728.407	8601886.855	7744.384	3716362.061	114288194.278	159984.919	140528.249	208605.097	6206749.368	24842.536	630308.563	141454.006	1136337.193	421980.854	194638.343	1291987.736
plasma-674-FMT-AKK_9	161507.761	505.109	9275.26	13951.501	1673296.089	516611.273	66923.699	5677785.824	89428284.245	62813.022	11888413.818	158093.366	841417.223	138426.144	14565695.592	44338.592	93121837.646	3004498.677	53281483.585	22922450.668	1991.771	39064.869	619972.444	91209.521	27893810.78	81746736.219	187805.46	1152768647.136	80632.605	8391.514	88301310.122	17978.086	6961.456	51393.548	9432421.993	8742.36	4077558.865	106803268.063	204041.791	135231.123	196099.372	6429956.57	7570.158	506874.507	85372.648	937068.49	442009.1	72739.142	967577.637
plasma-669-FMT_4	192825.381	737.357	12617.975	16520.437	1898840.682	561703.7	44545.648	6926244.709	131791172.869	59681.931	13713489.517	249099.553	951784.818	275758.202	18220121.919	31890.724	84876352.138	4383341.305	137867124.977	28710824.122	8801.913	65101.329	387022.639	72930.23	27642498.436	97510393.636	241189.105	1242937917.039	71973.362	8335.623	86863901.226	63972.763	4792.752	52052.449	11771079.699	7446.879	3990415.213	148007013.427	69276.695	84529.333	103213.676	6282516.006	NA	316716.299	73890.348	1074911.534	195727.839	129416.153	843027.576
St_mix_pre	NA	110087.034	59839.363	302096.486	NA	NA	409499.287	NA	NA	NA	NA	NA	NA	NA	NA	83949.05	NA	NA	NA	NA	NA	NA	NA	NA	NA	NA	NA	NA	NA	170979.148	NA	NA	426277.249	5959.517	NA	339772.021	NA	NA	NA	NA	NA	NA	NA	NA	NA	NA	NA	NA	NA
St_BA1_pre	NA	NA	NA	NA	NA	NA	NA	NA	NA	NA	NA	NA	NA	NA	NA	NA	NA	NA	NA	NA	22742.339	NA	NA	NA	NA	NA	NA	NA	NA	NA	NA	41810.205	NA	NA	NA	NA	NA	NA	NA	NA	NA	NA	NA	NA	NA	NA	NA	NA	NA
St_AA_pre	NA	NA	NA	NA	57490.97	42608.599	NA	50549181.529	NA	NA	325812689.429	NA	12724219.394	13080.758	3079285.529	NA	NA	721661.912	4805434.961	NA	NA	10477.24	18770.02	26395.644	262362.206	156125755.225	2208907.801	21575749.537	95251.662	NA	119264823.806	NA	NA	NA	5807301.156	NA	6494799.516	NA	NA	NA	NA	5650922.682	NA	NA	NA	18990.103	NA	NA	NA
St_BA2_pre	NA	NA	NA	NA	NA	NA	NA	NA	NA	NA	NA	NA	NA	NA	NA	NA	NA	NA	NA	NA	17909.665	NA	NA	NA	NA	NA	NA	NA	NA	NA	NA	1595366.028	NA	NA	NA	NA	NA	NA	NA	NA	NA	NA	NA	NA	NA	NA	NA	NA	NA
St_mix_post	NA	NA	NA	NA	NA	NA	NA	NA	NA	NA	NA	NA	NA	NA	NA	NA	NA	NA	NA	NA	NA	NA	NA	NA	NA	NA	NA	NA	NA	NA	NA	NA	NA	28005.178	NA	NA	NA	NA	NA	NA	NA	NA	NA	NA	NA	NA	NA	NA	NA
St_AA_post	NA	NA	NA	NA	28814.791	283105.242	NA	NA	NA	NA	294996626.018	19999.259	15984245.867	26116.424	3857285.889	NA	NA	1125921.423	20217239.016	7668.148	NA	2288.999	24357.764	12095.417	182212.319	137530110.87	3851124.866	NA	1.738	NA	148335620.973	NA	NA	NA	NA	NA	NA	75514.509	3217.781	NA	NA	4084669.512	NA	NA	NA	7096.698	NA	NA	NA
St_BA1_post	NA	NA	NA	NA	NA	NA	NA	NA	NA	NA	NA	NA	NA	NA	NA	NA	NA	NA	NA	NA	71033.092	NA	NA	NA	NA	NA	NA	NA	NA	NA	NA	9566.671	NA	NA	NA	NA	NA	NA	NA	NA	NA	NA	NA	NA	NA	NA	NA	NA	NA
St_BA2_post	NA	NA	NA	NA	NA	NA	NA	NA	NA	NA	NA	NA	NA	NA	NA	NA	NA	NA	NA	NA	16394.907	NA	NA	NA	NA	NA	NA	NA	NA	NA	NA	1654124.873	NA	NA	NA	NA	NA	NA	NA	NA	NA	NA	NA	NA	NA	NA	NA	NA	NA
[truncated: 188 more columns]

## Sheet: AreaCorrLog2Cen
Sid	2-deoxycytidine@1.41-qppos	2-hydroxy-2-methylbutyric acid@3.49-sf	2-hydroxy-3-methylbutyric acid@4.61-sf	2-hydroxybutyric acid@2.50-sf	2-hydroxyglutaric acid@13.18-gc	2-oxoglutaric acid@13.19-gc	3-hydroxybutyric acid@1.67-sf	3-hydroxyglutaric acid@1.42-qpneg	3-indoxyl sulfuric acid@5.08-qpneg	3-methylglutarylcarnitine*@2.78-qppos	3-methylhistidine@0.98-qppos	3-phenylpropionic acid@10.51-qpneg	4-hydroxyproline@12.61-gc	5-aminovaleric acid@13.70-gc	5-oxoproline@12.54-gc	Acetic acid@1.79-sf	Acetylcarnitine@1.23-qppos	Acetylcholine@1.06-qppos	Alanine@7.03-gc	Allantoin@1.09-qpneg	Alpha-muricholic acid@6.01-ba	Anthranilic acid@13.61-gc	Arabinose@14.34-gc	Arabitol@14.98-gc	Arachidonic acid@20.31-qpneg	Arginine@0.98-qppos	Aspartic acid@12.54-gc	Azelaic acid@9.84-qpneg	Behenic acid@25.17-qpneg	Benzoic acid@9.73-sf	Beta-alanine@11.33-gc	Beta-muricholic acid@6.30-ba	Butanoic acid@5.30-sf	Cadaverine@4.75-pa	Capric acid@15.84-qpneg	Caproic acid@12.07-sf	Caprylic acid@13.51-qpneg	Carnitine@1.00-qppos	Carnitine C10:0@12.24-qppos	Carnitine C10:1@11.45-qppos	Carnitine C12:0@14.00-qppos	Carnitine C12:1@10.61-qppos	Carnitine C14:0(OH)@13.73-qppos	Carnitine C14:1@14.74-qppos	Carnitine C14:2@13.95-qppos	Carnitine C16:0@17.32-qppos	Carnitine C16:1@16.19-qppos	Carnitine C18:0@19.08-qppos	Carnitine C18:1@17.76-qppos
BlM_pre	NA	-4.175	-2.049	0.212	-6.524	-9.151	1.341	-4.957	NA	NA	-3.598	NA	-7.906	-5.946	-4.748	-0.076	-13.241	NA	-10.865	-12.23	NA	-0.779	-6.16	-5.668	-6.862	-6.299	-5.076	-7.406	0.525	0.726	-0.197	NA	0.753	-0.263	-0.28	0.789	0.299	-11.111	NA	NA	NA	-0.038	NA	NA	NA	NA	NA	NA	NA
BlM_prea	NA	NA	NA	NA	NA	NA	NA	NA	NA	NA	NA	NA	NA	NA	NA	NA	NA	NA	NA	NA	-1.356	NA	NA	NA	NA	NA	NA	NA	NA	NA	NA	-2.204	NA	NA	NA	NA	NA	NA	NA	NA	NA	NA	NA	NA	NA	NA	NA	NA	NA
BlM_post	NA	0.016	0.044	0.196	-8.976	-10.168	0.324	-6.602	NA	NA	-8.365	NA	-9.058	-4.125	-4.785	0.079	-14.64	NA	-9.699	-10.424	-4.12	-5.268	-6.547	-6.015	-6.406	-7.02	-6.021	-6.01	-0.748	0.421	-0.1	-5.703	0.557	-0.45	-0.541	0.187	-0.308	-11.166	-5.227	NA	NA	0.069	NA	NA	NA	NA	NA	NA	NA
QC_plasma_4a	0.168	-5.754	-9.903	-8.515	NA	NA	-7.287	-0.002	0.617	0.302	-0.109	1.548	NA	NA	NA	-1.003	-0.033	-0.104	NA	0.01	NA	NA	NA	NA	-0.329	-0.036	NA	0.062	0.038	0.444	NA	NA	-2.216	0.137	0.054	-1.676	-0.134	-0.009	0.181	-0.134	0.002	-0.076	NA	-0.151	0.169	-0.299	-0.297	-0.265	-0.232
QC_plasma_5a	NA	NA	NA	NA	-0.079	-0.348	NA	NA	NA	NA	NA	NA	0.714	-0.701	-1.603	NA	NA	NA	-1.119	NA	NA	1.344	0.385	0.662	NA	NA	0.856	NA	NA	NA	0.198	NA	NA	NA	NA	NA	NA	NA	NA	NA	NA	NA	NA	NA	NA	NA	NA	NA	NA
QC_batch-plasma_5a	NA	NA	NA	NA	NA	NA	NA	NA	NA	NA	NA	NA	NA	NA	NA	NA	NA	NA	NA	NA	0.578	NA	NA	NA	NA	NA	NA	NA	NA	NA	NA	1.001	NA	NA	NA	NA	NA	NA	NA	NA	NA	NA	NA	NA	NA	NA	NA	NA	NA
QC_plasma_4b	-0.15	-7.215	-11.52	-9.397	NA	NA	-7.622	0.036	0.658	0.092	-0.014	1.507	NA	NA	NA	-1.069	0.005	0.05	NA	-0.039	NA	NA	NA	NA	-0.26	-0.079	NA	-0.003	-0.023	0.297	NA	NA	-2.503	0.168	0.107	-1.698	-0.245	-0.026	0.046	0.134	0.175	-0.079	0.019	-0.168	-0.024	-0.151	-0.401	0.066	-0.095
QC_plasma_5b	NA	NA	NA	NA	-0.008	-0.034	NA	NA	NA	NA	NA	NA	-0.066	0.302	-0.291	NA	NA	NA	-0.497	NA	NA	1.104	0.24	0.223	NA	NA	0.198	NA	NA	NA	0.116	NA	NA	NA	NA	NA	NA	NA	NA	NA	NA	NA	NA	NA	NA	NA	NA	NA	NA
QC_batch-plasma_5b	NA	NA	NA	NA	NA	NA	NA	NA	NA	NA	NA	NA	NA	NA	NA	NA	NA	NA	NA	NA	0.568	NA	NA	NA	NA	NA	NA	NA	NA	NA	NA	1.002	NA	NA	NA	NA	NA	NA	NA	NA	NA	NA	NA	NA	NA	NA	NA	NA	NA
QC_plasma_4c	0.033	-5.32	-8.499	-8.632	NA	NA	-7.219	-0.012	0.639	0.195	0.143	1.639	NA	NA	NA	-0.989	0.086	0.201	NA	-0.064	NA	NA	NA	NA	-0.332	0.104	NA	0.064	0.406	0.457	NA	NA	-2.311	0.216	0.03	-1.778	-0.086	-0.036	0.196	-0.039	-0.355	-0.02	-0.084	-0.136	0.267	-0.121	-0.217	-0.005	-0.135
QC_batch-plasma_5c	NA	NA	NA	NA	NA	NA	NA	NA	NA	NA	NA	NA	NA	NA	NA	NA	NA	NA	NA	NA	0.253	NA	NA	NA	NA	NA	NA	NA	NA	NA	NA	0.925	NA	NA	NA	NA	NA	NA	NA	NA	NA	NA	NA	NA	NA	NA	NA	NA	NA
QC_plasma_6a	NA	NA	NA	NA	0.12	0.31	NA	NA	NA	NA	NA	NA	0.257	0.16	0.629	NA	NA	NA	0.039	NA	NA	1.279	0.292	-0.048	NA	NA	0.243	NA	NA	NA	0.067	NA	NA	NA	NA	NA	NA	NA	NA	NA	NA	NA	NA	NA	NA	NA	NA	NA	NA
QC_plasma_4d	-0.157	-5.394	-9.953	-7.826	NA	NA	-7.106	-0.003	0.545	0.297	-0.082	1.481	NA	NA	NA	-0.971	-0.179	-0.205	NA	-0.035	NA	NA	NA	NA	-0.403	-0.079	NA	0.098	-0.219	0.557	NA	NA	-1.984	0.007	-0.02	-1.484	-0.056	-0.056	0.074	-0.205	-0.122	-0.03	0.419	-0.241	0.198	-0.218	-0.426	-0.495	-0.13
QC_batch-plasma_5d	NA	NA	NA	NA	NA	NA	NA	NA	NA	NA	NA	NA	NA	NA	NA	NA	NA	NA	NA	NA	0.102	NA	NA	NA	NA	NA	NA	NA	NA	NA	NA	0.919	NA	NA	NA	NA	NA	NA	NA	NA	NA	NA	NA	NA	NA	NA	NA	NA	NA
QC_plasma_6b	NA	NA	NA	NA	0.074	0.341	NA	NA	NA	NA	NA	NA	-0.018	0.372	1.086	NA	NA	NA	-0.277	NA	NA	1.168	0.23	-0.088	NA	NA	0.131	NA	NA	NA	-0.087	NA	NA	NA	NA	NA	NA	NA	NA	NA	NA	NA	NA	NA	NA	NA	NA	NA	NA
QC_plasma_4e	0.155	-6.32	-7.901	-8.221	NA	NA	-7.22	0.002	0.603	0.19	-0.082	1.567	NA	NA	NA	-0.988	0.055	0.019	NA	0.18	NA	NA	NA	NA	-0.349	-0.047	NA	0.121	0.008	0.612	NA	NA	-2.542	0.031	0.08	-1.258	-0.077	0.006	0.156	0.049	0.18	-0.103	0.71	-0.116	0.039	-0.264	-0.297	0.025	-0.209
QC_plasma_5c	NA	NA	NA	NA	0.143	0.278	NA	NA	NA	NA	NA	NA	0.226	0.793	0.38	NA	NA	NA	0.226	NA	NA	1.187	0.327	-0.133	NA	NA	0.289	NA	NA	NA	0.144	NA	NA	NA	NA	NA	NA	NA	NA	NA	NA	NA	NA	NA	NA	NA	NA	NA	NA
QC_batch-plasma_5e	NA	NA	NA	NA	NA	NA	NA	NA	NA	NA	NA	NA	NA	NA	NA	NA	NA	NA	NA	NA	0.221	NA	NA	NA	NA	NA	NA	NA	NA	NA	NA	0.937	NA	NA	NA	NA	NA	NA	NA	NA	NA	NA	NA	NA	NA	NA	NA	NA	NA
plasma-666-FMT_1	0.112	-0.274	-0.319	-0.705	-0.575	-0.558	0.073	-0.076	1.871	0.4	0.047	-1.11	0.586	-0.059	-1.405	-0.206	-0.209	0.32	-0.739	0.254	0.697	0.772	-1.13	0.045	0.165	0.13	0.941	-0.263	0.721	-0.097	-0.017	0.273	-0.1	-0.273	0.116	-0.042	-0.015	-0.052	0.261	0.296	0.056	-0.094	NA	0.243	0.345	-0.108	0.113	0.274	0.01
plasma-667-FMT-AKK-Pas_2	-0.202	-2.893	-0.282	-0.135	0.251	-0.347	0.482	-0.506	0.774	-0.75	0.135	-1.028	0.198	-0.309	-1.661	0.551	-0.335	0.143	-0.548	0.106	-0.649	-0.475	0.242	0.309	-0.438	-0.184	-0.449	0.056	0.054	-0.216	0.011	-0.698	0.511	-0.351	-0.122	0.02	0.109	-0.266	-0.277	-0.995	0.12	-0.01	NA	-0.273	-0.497	-0.524	-0.632	-0.129	-0.752
plasma-684-SPF_19	0.016	-1.065	-0.679	0.192	0.043	-0.465	0.774	0.427	1.29	NA	-0.365	4.103	-0.704	-0.426	-1.15	-0.094	-0.049	-0.333	-1.722	0.078	0.242	2.174	-0.345	-0.173	-0.283	-0.327	-0.436	0.428	0.165	0.045	0.012	-0.569	-0.158	0.417	0.172	0.214	0.383	-0.187	0.04	0.109	0.302	-0.013	-0.356	0.301	0.543	-0.156	0.121	0.221	0.089
plasma-668-FMT-AKK_3	-0.184	-0.831	-0.691	-0.304	-0.304	-0.966	-0.04	-0.322	0.511	-0.008	-0.012	-1.423	-0.261	-0.809	-0.892	-0.245	0.237	0.044	-0.115	-0.469	-1.448	-0.234	0.545	0.382	0.139	0.226	-0.129	-0.131	-0.247	-0.055	0.031	-1.93	-0.226	-0.173	-0.055	-0.258	-0.031	0.104	-0.137	0.063	-0.262	-0.055	-1.64	-0.304	-0.193	-0.078	-0.308	-0.097	-0.128
plasma-690-ATB_25	0.05	-0.157	-0.793	-0.491	-0.165	-0.036	-1.031	0.214	-3.245	0.6	-0.088	NA	-0.45	-0.503	-1.111	-0.688	-0.296	-0.165	0.651	-0.328	0.142	-0.234	-0.633	0.363	0.269	-0.093	-0.178	-0.077	-0.011	-0.043	0.074	1.206	-0.316	-0.246	-0.027	-0.147	-0.063	0.336	-0.41	-0.399	-0.467	-0.007	-1.259	-0.229	-0.108	-0.097	0.03	-0.171	0.035
plasma-681-FMT-AKK-Pas_16	-0.051	-0.351	0.651	0.017	0.05	-0.013	-0.299	0.202	1.213	-0.698	0.112	-0.555	0.303	0.252	-0.501	0.205	-0.1	0.306	-0.259	0.211	-1.011	1.313	1.131	0.608	0.106	0.265	0.669	-0.158	0.219	-0.067	0.095	-0.33	0.539	0.409	0.154	0.103	0.008	-0.103	-0.004	-0.119	0.08	0.059	-1.251	-0.244	-0.231	-0.264	-0.565	0.078	-0.614
plasma-670-FMT_5	0.15	0.394	0.301	-1.053	0.225	-0.736	-1.42	-0.057	0.763	-0.224	0.444	-0.824	0.283	-0.141	-0.242	-0.424	-0.474	0.364	0.409	0.058	-1.039	-0.12	-0.543	-0.202	-0.806	0.068	-0.418	0.438	-0.262	0.057	0.051	-0.901	-0.851	0.862	-0.146	-0.043	0.087	0.358	-3.085	-2.047	-1.858	-0.041	NA	-1.596	-1.729	-0.357	-1.138	-0.307	-0.925
plasma-685-SPF_20	-0.084	0.63	0.183	0.662	-0.008	0.54	0.745	0.003	1.396	-0.261	0.043	3.56	-0.84	0.278	-0.88	0.44	-0.279	-0.068	0.595	0.378	0.593	0.638	1.055	0.153	-0.385	-0.215	-1.42	-0.077	0.074	0.09	0.046	0.5	0.165	-0.434	0.002	0.016	-0.167	-0.098	0.189	-1.114	0.436	0.019	0.791	0.427	-0.337	0.244	0.534	0.159	0.301
plasma-675-FMT-AKK_10	-0.13	0.571	0.257	0.244	-0.226	-0.352	0.09	-0.212	0.573	0.582	-0.02	-1.298	-0.58	0.044	-0.124	0.075	0.172	-0.03	0.603	0.01	-1.051	0.274	0.187	0.072	-0.132	0.017	-1.046	-0.183	-0.504	-0.116	0.036	-0.645	0.285	0.157	0.028	-0.052	-0.103	0.123	0.842	0.086	0.749	-0.005	-0.003	0.557	-0.055	0.122	0.73	0.122	0.337
plasma-692-ATB_27	0.1	0.017	-0.324	0.168	-0.034	0.853	-0.216	0.076	-3.619	0.347	0.136	-1.381	0.809	0.665	0.024	-0.345	0.072	0.237	1.079	0.095	1.846	-0.802	-0.674	0.456	0.101	0.479	1.292	0.112	-0.225	-0.04	0.095	2.431	-0.076	-0.105	-0.131	-0.011	-0.095	0.07	0.421	0.556	0.307	0.089	-2.34	0.352	0.473	0.256	0.367	0.373	0.587
plasma-683-FMT_18	-0.052	0.112	1.159	0.122	0.349	0.306	-0.235	0.099	0.903	-1.722	0.196	-0.619	0.751	0.222	0.017	0.875	-0.186	0.32	0.551	0.066	0.199	-0.023	0.266	0.185	-0.312	0.077	-0.202	-0.055	-0.248	-0.108	0.191	-0.315	0.613	0.465	-0.115	0.194	0.021	-0.084	-0.163	-0.175	0.038	-0.037	-1.802	-0.361	-0.493	-0.461	-0.38	-0.343	-0.517
plasma-689-SPF_24	-0.247	0.506	-0.032	-0.562	-0.516	-0.794	1.16	-0.315	0.429	NA	-0.359	2.881	-0.654	-0.165	-0.105	-0.093	0.464	-0.191	-1.408	-0.352	-1.667	0.548	-0.602	-0.742	0.477	-0.137	0.001	-0.255	-0.045	-0.127	0.115	-2.084	-0.606	-0.092	-0.121	-0.41	0.188	-0.691	0.633	0.635	0.374	-0.005	NA	0.278	0.535	0.175	0.24	0.072	0.26
plasma-680-FMT-AKK_15	-0.064	0.05	0.187	-0.367	0.145	-0.876	0.212	-0.168	0.539	-0.223	-0.272	-0.974	0.064	0.083	-0.051	0.063	0.184	-0.16	0.38	-0.348	-0.818	0.103	0.141	-0.347	0.239	-0.343	-0.641	0.069	0.305	-0.001	0.087	-1.376	-0.099	-0.282	-0.147	0.168	0.041	0.042	0.495	0.818	-0.047	-0.007	0.283	-0.116	0.129	-0.241	-0.146	0.252	0.039
plasma-686-ATB_21	0.024	0.273	-0.034	0.76	-0.125	0.493	1.143	-0.035	-3.8	1.3	0.181	NA	0.209	-0.127	-0.251	0.106	0.666	-0.162	0.033	-0.304	-0.276	-3.584	-0.952	0.008	0.333	-0.049	-0.835	-0.132	-0.181	-0.006	0.049	0.635	-0.261	-0.018	-0.014	-0.117	0.105	-0.089	0.632	0.82	0.779	-0.025	1.517	0.922	0.95	0.724	0.803	0.714	0.947
plasma-676-FMT-AKK-Pas_11	-0.093	-0.186	0.802	-0.546	0.096	-0.013	-1.462	0.016	1.13	-0.225	-0.048	-0.389	0	-0.031	-0.092	-0.409	-0.369	0.276	-0.145	-0.16	-0.42	0.837	0.876	0.392	-0.448	-0.144	0.404	-0.118	-0.505	-0.057	0.007	-0.377	-0.131	-0.005	0.055	-0.106	-0.049	0.004	-0.735	-1.504	-0.667	0.024	NA	-0.655	-0.619	-0.915	-0.895	-1.492	-1.114
plasma-682-FMT_17	0.114	0.513	0.996	-0.33	-0.055	-0.024	-0.748	-0.104	1.132	0.11	0.174	-0.678	0.053	0.592	0.455	0.012	-0.073	-0.098	0.348	0.174	0.86	1.259	-0.952	-0.402	-0.197	-0.103	0.534	0.271	-0.002	-0.16	0.072	0.336	0.093	-0.154	0.067	0.187	0.015	0.193	0.17	0.104	-0.233	-0.003	0.259	-0.23	-0.03	0.319	-0.118	0.022	0.279
plasma-688-ATB_23	-0.138	-0.389	-4.631	-0.119	0.028	0.518	-0.714	-0.043	-3.177	0.121	-0.22	-1.044	0.056	-0.159	-0.015	-0.653	-0.132	-0.306	0.674	-0.271	0.695	-2.021	-0.869	-0.061	-0.094	0.321	0.165	0.43	-0.223	0.042	0.071	1.491	-0.446	-0.195	-0.154	-0.121	-0.026	0.042	-0.376	-0.292	-0.433	0.053	-0.303	-0.155	0.041	-0.003	0.105	-0.089	0.122
plasma-687-SPF_22	0.095	0.658	0.189	1.431	0.14	0.63	0.941	0.127	-0.153	0.257	0.019	3.118	-0.136	0.44	0.553	-0.358	0.322	-0.359	0.183	0.27	0.132	-0.12	-0.246	-0.36	0.498	-0.038	0.623	0.133	0.201	0.152	0.05	-0.74	0.082	-0.085	-0.069	-0.269	0.084	-0.027	0.566	1.019	0.893	0.054	2.005	0.957	1.214	0.504	0.676	0.505	0.595
plasma-679-FMT-AKK_14	-0.019	0.166	0.222	-0.194	0.107	-0.424	0.189	-0.176	-0.09	0.319	-0.336	-1.372	0.098	-0.497	0.409	-0.184	0.147	-0.329	1.008	-0.338	-1.362	-1.14	0.839	-0.055	0.212	-0.009	-0.467	-0.357	0.037	0.014	-0.34	-0.592	-1.021	0.663	-0.1	-0.068	-0.259	0.117	0.1	0.647	-0.147	-0.053	NA	-0.306	0.264	-0.073	-0.533	0.234	0.145
plasma-673-FMT-AKK-Pas_8	0.011	0.168	0.8	0.08	0.394	-1.111	0.467	0.272	-1.03	-0.265	-0.101	-0.852	0.31	0.136	-0.086	0.684	-0.075	-0.122	-0.375	-0.154	-0.012	-1.695	0.688	0.113	0.014	-0.23	-0.468	0.098	0.322	-0.054	0.038	0.364	0.307	0.943	0.056	0.07	-0.013	-0.275	0.162	0.692	-0.092	0.07	-1.007	-0.268	0.069	-0.621	-0.242	-0.794	-0.51
plasma-691-ATB_26	0.397	0.036	-0.047	0.167	0.147	0.548	0.022	0.291	-2.463	0.436	-0.037	-1.365	0.266	-0.542	0.148	-0.24	0.334	-0.157	1.121	-0.226	2.923	-2.046	-0.496	0.289	0.709	0.086	0.471	0.045	0.569	-0.049	-0.016	4.071	0.129	-0.435	-0.002	-0.027	-0.024	0.289	0.804	1.075	0.423	-0.047	1.748	0.761	0.703	0.721	0.99	0.675	1.082
plasma-678-FMT_13	-0.135	0.099	0.785	-0.187	0.002	0.367	-0.537	0.091	1.394	-1.143	0.098	-0.542	0.157	0.3	0.554	0.858	-0.159	0.287	-0.41	0.37	2.55	0.761	-0.434	-0.231	-0.327	-0.124	0.341	-0.203	0.114	0.098	-0.043	1.923	1.077	-0.56	0.15	0.185	-0.137	0.006	-0.359	-0.14	-0.587	-0.077	-0.427	-0.509	-0.533	-0.538	-0.5	-0.634	-0.752
plasma-677-FMT-AKK-Pas_12	-0.103	0.286	0.778	0.161	-0.216	-0.176	0.025	-0.056	0.863	-0.18	0.048	-1.095	-0.45	0.24	0.599	0.295	-0.157	0.193	-0.666	0.338	0.429	0.093	-0.408	-0.346	-0.136	-0.356	-0.387	-0.102	-0.126	0.137	-0.075	0.565	-0.03	0.172	-0.139	-0.01	0.072	-0.152	0.278	0.05	0.051	-0.004	1.069	-0.015	0.23	0.091	-0.021	0.177	0.039
plasma-693-SPF_28	-0.127	0.253	-0.226	1.378	0.117	0.223	0.634	0.072	1.009	0.754	-0.273	3.768	-0.251	0.345	0.766	-0.238	0.661	-0.191	-1.316	-0.224	-1.181	0.116	0.588	-0.079	0.254	-0.356	-0.281	0.123	0.072	0.051	0.04	-2.524	0.138	-0.353	0.053	0.02	-0.077	0.063	0.515	0.745	0.106	-0.028	-0.122	0.018	0.168	0.33	0.125	0.054	0.273
plasma-672-FMT-AKK_7	0.404	0.5	0.304	-0.083	0.052	-0.112	-0.193	-0.082	0.449	-0.165	-0.068	-0.994	0.293	0.27	0.923	0.308	-0.161	0.024	0.764	0.186	-1.096	0.696	0.567	0.023	0.236	0.215	-0.22	-0.031	-0.047	0.039	-0.054	-0.492	0.548	0.691	-0.024	-0.027	-0.062	-0.047	-0.331	-0.464	-0.568	-0.057	-0.345	-0.546	-0.822	-0.099	-0.294	-0.306	-0.361
plasma-694-ATB_29	0.405	-0.13	-0.288	0.061	0.326	0.92	-0.024	0.333	-3.383	0.654	-0.145	-1.202	-0.03	-0.065	0.603	-0.173	0.116	-0.025	-0.563	-0.15	1.514	-2.009	-0.46	0.14	0.446	-0.096	0.491	0.342	0.01	0.186	-0.077	3.441	0.46	-0.463	0.038	0.446	0.004	0.16	0.755	0.92	0.485	-0.063	1.199	0.783	0.898	0.674	1.036	0.601	0.878
plasma-671-FMT-AKK-Pas_6	-0.104	0.352	0.485	0.017	0.002	0.476	0.722	-0.066	1.283	-0.25	0.006	-1.067	-0.378	-0.084	0.662	0.456	0.111	-0.076	-0.226	0.155	-0.635	1.556	0.696	0.105	-0.264	-0.155	0.026	-0.072	-0.294	0.098	-0.054	-2.172	0.472	-0.189	0.027	0.131	0.079	-0.017	0.066	-0.056	0.359	-0.112	0.359	0.284	-0.012	-0.001	0.184	-0.06	-0.121
plasma-695-SPF_30	0.04	-0.055	-0.055	0.006	0.068	0.793	0.22	0.125	1.281	0.028	-0.062	3.976	-0.046	-0.349	0.678	-0.2	-0.29	-0.219	-0.859	-0.041	0.65	1.412	0.372	-0.278	-0.19	0.099	0.484	-0.09	0.16	0.132	-0.19	-0.409	0.075	-0.504	-0.046	-0.056	-0.104	-0.03	-0.066	-0.18	0.301	0.102	1.67	0.41	0.254	0.244	0.253	0.632	0.27
plasma-674-FMT-AKK_9	-0.22	0.1	-0.07	-0.315	-0.25	0.107	-0.196	-0.208	0.799	0.14	0.28	-1.125	0.085	-0.298	0.924	0.048	-0.004	-0.033	-0.209	0.145	-1.475	0.607	0.615	-0.021	-0.087	0.36	0.387	-0.176	0.031	0.032	-0.142	-1.458	-0.317	0.061	0.087	0.119	0.03	-0.128	0.285	-0.236	0.212	0.153	-0.044	0.096	-0.475	-0.034	0.32	-0.788	-0.147
plasma-669-FMT_4	0.036	0.646	0.374	-0.072	-0.067	0.228	-0.783	0.079	1.358	0.066	0.486	-0.469	0.262	0.696	1.247	-0.428	-0.138	0.511	1.163	0.47	0.669	1.344	-0.065	-0.344	-0.1	0.614	0.748	-0.068	-0.133	0.022	-0.166	0.373	-0.856	0.08	0.407	-0.112	-0.001	0.343	-1.273	-0.914	-0.714	0.12	NA	-0.583	-0.683	0.164	-0.855	0.043	-0.346
St_mix_pre	NA	7.868	2.62	4.121	NA	NA	2.417	NA	NA	NA	NA	NA	NA	NA	NA	0.969	NA	NA	NA	NA	NA	NA	NA	NA	NA	NA	NA	NA	NA	4.38	NA	NA	5.619	-3.047	NA	5.399	NA	NA	NA	NA	NA	NA	NA	NA	NA	NA	NA	NA	NA
St_BA1_pre	NA	NA	NA	NA	NA	NA	NA	NA	NA	NA	NA	NA	NA	NA	NA	NA	NA	NA	NA	NA	2.038	NA	NA	NA	NA	NA	NA	NA	NA	NA	NA	-0.24	NA	NA	NA	NA	NA	NA	NA	NA	NA	NA	NA	NA	NA	NA	NA	NA	NA
St_AA_pre	NA	NA	NA	NA	-5.113	-3.493	NA	2.947	NA	NA	5.056	NA	4.003	-3.702	-1.318	NA	NA	-2.091	-3.68	NA	NA	-1.292	-4.431	-1.81	-6.819	1.294	3.943	-5.916	0.272	NA	0.291	NA	NA	NA	-0.612	NA	0.701	NA	NA	NA	NA	-0.033	NA	NA	NA	-5.659	NA	NA	NA
St_BA2_pre	NA	NA	NA	NA	NA	NA	NA	NA	NA	NA	NA	NA	NA	NA	NA	NA	NA	NA	NA	NA	1.694	NA	NA	NA	NA	NA	NA	NA	NA	NA	NA	5.013	NA	NA	NA	NA	NA	NA	NA	NA	NA	NA	NA	NA	NA	NA	NA	NA	NA
St_mix_post	NA	NA	NA	NA	NA	NA	NA	NA	NA	NA	NA	NA	NA	NA	NA	NA	NA	NA	NA	NA	NA	NA	NA	NA	NA	NA	NA	NA	NA	NA	NA	NA	NA	-0.815	NA	NA	NA	NA	NA	NA	NA	NA	NA	NA	NA	NA	NA	NA	NA
St_AA_post	NA	NA	NA	NA	-6.109	-0.761	NA	NA	NA	NA	4.913	-4.108	4.332	-2.704	-0.993	NA	NA	-1.449	-1.607	-11.401	NA	-3.486	-4.055	-2.936	-7.345	1.111	4.745	NA	-15.47	NA	0.606	NA	NA	NA	NA	NA	NA	-10.594	-5.702	NA	NA	-0.501	NA	NA	NA	-7.079	NA	NA	NA
St_BA1_post	NA	NA	NA	NA	NA	NA	NA	NA	NA	NA	NA	NA	NA	NA	NA	NA	NA	NA	NA	NA	3.681	NA	NA	NA	NA	NA	NA	NA	NA	NA	NA	-2.368	NA	NA	NA	NA	NA	NA	NA	NA	NA	NA	NA	NA	NA	NA	NA	NA	NA
St_BA2_post	NA	NA	NA	NA	NA	NA	NA	NA	NA	NA	NA	NA	NA	NA	NA	NA	NA	NA	NA	NA	1.566	NA	NA	NA	NA	NA	NA	NA	NA	NA	NA	5.066	NA	NA	NA	NA	NA	NA	NA	NA	NA	NA	NA	NA	NA	NA	NA	NA	NA
[truncated: 188 more columns]

## Sheet: RatioInfos
	Analyte	MetName	AnalyteNum	AnalyteDen
Uridine/UMP	Uridine/UMP	Uridine/UMP	Uridine@1.70-qpneg	UMP@1.38-qpneg
Xanthine/HXanthine	Xanthine/HXanthine	Xanthine/HXanthine	Xanthine@2.39-qpneg	Hypoxanthine@2.32-qppos
HXanthine/Inosine	HXanthine/Inosine	HXanthine/Inosine	Hypoxanthine@2.32-qppos	Inosine@2.43-qppos
Uracil/Uridine	Uracil/Uridine	Uracil/Uridine	Uracil@10.20-gc	Uridine@1.70-qpneg
AcCarn/Carn	AcCarn/Carn	AcCarn/Carn	Acetylcarnitine@1.23-qppos	Carnitine@1.00-qppos
Glyc3P/Glycerol	Glyc3P/Glycerol	Glyc3P/Glycerol	Glycerol-3-phosphate@1.05-qpneg	Glycerol@9.37-gc
Taurocholate/Tau	Taurocholate/Tau	Taurocholate/Tau	Taurocholic acid@4.51-ba	Taurine@1.01-qpneg
TCDCholate/Tau	TCDCholate/Tau	TCDCholate/Tau	Taurochenodeoxycholic acid@7.01-ba	Taurine@1.01-qpneg
Glyc3P/GPCho	Glyc3P/GPCho	Glyc3P/GPCho	Glycerol-3-phosphate@1.05-qpneg	Glycerophosphorylcholine@1.02-qppos
Stearate/Linolenate	Stearate/Linolenate	Stearate/Linolenate	Stearidonic acid@18.89-qpneg	Linolenic acid@19.59-qpneg
Fum/Suc	Fum/Suc	Fum/Suc	Fumaric acid@10.24-gc	Succinic acid@8.62-sf
Pyr/Lac	Pyr/Lac	Pyr/Lac	Pyruvic acid;Oxaloacetic acid@6.36-gc	Lactic acid@6.49-gc
aHGA/aKG	aHGA/aKG	aHGA/aKG	2-hydroxyglutaric acid@13.18-gc	2-oxoglutaric acid@13.19-gc
PEP/Oaa	PEP/Oaa	PEP/Oaa	Phosphoenolpyruvic acid@1.15-qpneg	Pyruvic acid;Oxaloacetic acid@6.36-gc
Citrate/Oaa	Citrate/Oaa	Citrate/Oaa	Citric acid;Isocitric acid@15.98-gc	Pyruvic acid;Oxaloacetic acid@6.36-gc
Pyr/PEP	Pyr/PEP	Pyr/PEP	Pyruvic acid;Oxaloacetic acid@6.36-gc	Phosphoenolpyruvic acid@1.15-qpneg
Pyr/Malate	Pyr/Malate	Pyr/Malate	Pyruvic acid;Oxaloacetic acid@6.36-gc	Malic acid@12.15-gc
Oaa/Malate	Oaa/Malate	Oaa/Malate	Pyruvic acid;Oxaloacetic acid@6.36-gc	Malic acid@12.15-gc
Fum/Malate	Fum/Malate	Fum/Malate	Fumaric acid@10.24-gc	Malic acid@12.15-gc
Xylose/Xylitol	Xylose/Xylitol	Xylose/Xylitol	Xylose@14.27-gc	Xylitol@14.85-gc
Rib5P/Ribose	Rib5P/Ribose	Rib5P/Ribose	Ribose-5-phosphate;Ribulose-5-phosphate@1.05-qpneg	Ribose;Ribulose@14.51-gc
Sucrose/Raffinose	Sucrose/Raffinose	Sucrose/Raffinose	Sucrose@27.03-gc	Raffinose@31.39-gc
Cit/Arg	Cit/Arg	Cit/Arg	Citrulline@1.03-qpneg	Arginine@0.98-qppos
Tyr/Phe	Tyr/Phe	Tyr/Phe	Tyrosine@17.28-gc	Phenylalanine@13.78-gc
Orn/Arg	Orn/Arg	Orn/Arg	Ornithine@2.24-pa	Arginine@0.98-qppos
Cit/Orn	Cit/Orn	Cit/Orn	Citrulline@1.03-qpneg	Ornithine@2.24-pa
Put/Orn	Put/Orn	Put/Orn	Putrescine@4.74-pa	Ornithine@2.24-pa
Kyn/Trp	Kyn/Trp	Kyn/Trp	Kynurenine@21.46-gc	Tryptophan@21.89-gc
Ser/Gly	Ser/Gly	Ser/Gly	Serine@10.52-gc	Glycine@9.78-gc
Pyr/Ala	Pyr/Ala	Pyr/Ala	Pyruvic acid;Oxaloacetic acid@6.36-gc	Alanine@7.03-gc
Pyr/Ser	Pyr/Ser	Pyr/Ser	Pyruvic acid;Oxaloacetic acid@6.36-gc	Serine@10.52-gc
aKG/Glu	aKG/Glu	aKG/Glu	2-oxoglutaric acid@13.19-gc	Glutamic acid@13.70-gc
Oaa/Asp	Oaa/Asp	Oaa/Asp	Pyruvic acid;Oxaloacetic acid@6.36-gc	Aspartic acid@12.54-gc
Asp/Malate	Asp/Malate	Asp/Malate	Aspartic acid@12.54-gc	Malic acid@12.15-gc
Urea/Arginine	Urea/Arginine	Urea/Arginine	Urea@8.91-gc	Arginine@0.98-qppos
Val/KIV	Val/KIV	Val/KIV	Valine@8.56-gc	Ketoisovaleric acid@7.48-gc
BetaAla/Asp	BetaAla/Asp	BetaAla/Asp	Beta-alanine@11.33-gc	Aspartic acid@12.54-gc
HOPro/Pro	HOPro/Pro	HOPro/Pro	4-hydroxyproline@12.61-gc	Proline@9.65-gc
PCr/Creatine	PCr/Creatine	PCr/Creatine	Phosphocreatine@1.17-qppos	Creatine@12.98-gc
Anthr/Kyn	Anthr/Kyn	Anthr/Kyn	Anthranilic acid@13.61-gc	Kynurenine@21.46-gc
Asp/NAcAsp	Asp/NAcAsp	Asp/NAcAsp	Aspartic acid@12.54-gc	N-acetylaspartic acid@1.42-qpneg
GABA/Glu	GABA/Glu	GABA/Glu	GABA@12.62-gc	Glutamic acid@13.70-gc
NAAG/NAcAsp	NAAG/NAcAsp	NAAG/NAcAsp	NAAG@1.78-qppos	N-acetylaspartic acid@1.42-qpneg
Spmd/Put	Spmd/Put	Spmd/Put	Spermidine@6.69-pa	Putrescine@4.74-pa
Spr/Spmd	Spr/Spmd	Spr/Spmd	Spermine@7.48-pa	Spermidine@6.69-pa
SAM/Met	SAM/Met	SAM/Met	S-adenosylmethionine@4.19-pa	Methionine@12.49-gc
GSH/GSSG	GSH/GSSG	GSH/GSSG	Glutathione@1.30-qppos	Ox. glutathione@1.43-qppos
Glu/Oxoproline	Glu/Oxoproline	Glu/Oxoproline	Glutamic acid@13.70-gc	5-oxoproline@12.54-gc
AcSpmd/Spmd	AcSpmd/Spmd	AcSpmd/Spmd	N1-acetylspermidine@5.38-pa	Spermidine@6.69-pa
AcSpmd/Spmd_1	AcSpmd/Spmd_1	AcSpmd/Spmd	N8-acetylspermidine@5.57-pa	Spermidine@6.69-pa

## Sheet: Ratio
	Uridine.UMP	Xanthine.HXanthine	HXanthine.Inosine	Uracil.Uridine	AcCarn.Carn	Glyc3P.Glycerol	Taurocholate.Tau	TCDCholate.Tau	Glyc3P.GPCho	Stearate.Linolenate	Fum.Suc	Pyr.Lac	aHGA.aKG	PEP.Oaa	Citrate.Oaa	Pyr.PEP	Pyr.Malate	Oaa.Malate	Fum.Malate	Xylose.Xylitol	Rib5P.Ribose	Sucrose.Raffinose	Cit.Arg	Tyr.Phe	Orn.Arg	Cit.Orn	Put.Orn	Kyn.Trp	Ser.Gly	Pyr.Ala	Pyr.Ser	aKG.Glu	Oaa.Asp	Asp.Malate	Urea.Arginine	Val.KIV	BetaAla.Asp	HOPro.Pro	PCr.Creatine	Anthr.Kyn	Asp.NAcAsp	GABA.Glu	NAAG.NAcAsp	Spmd.Put	Spr.Spmd	SAM.Met	GSH.GSSG	Glu.Oxoproline	AcSpmd.Spmd
plasma-666-FMT_1	1471.03	#N/A	#N/A	0.0359555	0.732595	0.0554513	0.00153644	4.12171e-05	0.575313	0.0339622	136.104	0.0158342	4.10399	#N/A	2.4126	#N/A	5.3513	5.3513	0.878379	6.60047	3.66926	3.02053	0.171097	0.0234349	0.113475	1.5078	0.0649851	0.00632535	0.209498	0.204392	3.02146	1.2623	27.5578	0.194185	10.3117	173.61	346.709	22.6082	3.28187	5.59702	0.235023	0.384089	0.0663588	4.48327	0.0522872	0.00125032	2.76935	0.0904452	0.030452
plasma-667-FMT-AKK-Pas_2	33.307	0.194402	7.85617	0.0350266	0.777752	0.0481684	0.00168992	2.9579e-05	0.32124	0.0473319	139.587	0.0196928	6.26253	0.000388125	2.26973	2576.49	11.0396	11.0396	1.13409	14.1912	4.68695	1.48262	0.168294	0.0367694	0.128899	1.30563	0.0497494	0.00461787	0.229422	0.149036	2.71317	5.62408	59.0483	0.186959	12.8506	247.811	943.034	19.3465	5.87425	4.30713	0.133959	1.06824	0.0400324	3.77247	0.0587368	0.00384142	3.97036	0.0270229	0.0292995
plasma-684-SPF_19	45.8186	1.56902	3.68702	0.0555848	0.896888	0.0606107	0.00183923	3.55653e-05	0.51052	0.0444562	146.311	0.0131626	5.8639	0.000634325	3.12176	1576.48	6.193	6.193	1.1127	16.1876	4.12521	3.56437	0.149264	0.0429295	0.104533	1.42792	0.111823	0.00554938	0.214591	0.345035	3.20098	4.90772	59.11	0.104771	13.7785	110.449	950.672	23.7107	7.30059	28.4615	0.0926884	0.79053	0.0493755	4.58292	0.0493303	0.00267833	0.537878	0.019334	0.0472991
plasma-668-FMT-AKK_3	175.597	1.58318	8.03853	0.05595	0.89297	0.0485738	0.00130631	2.00647e-05	0.360033	0.0500373	106.656	0.0147275	6.50175	#N/A	2.56994	#N/A	13.2354	13.2354	1.27803	19.0069	4.54611	4.76844	0.123069	0.0635334	0.0816315	1.50762	0.0740291	0.0122299	0.167119	0.12955	3.40893	3.89492	53.8867	0.245615	8.77632	197.752	790.551	12.4337	7.92297	2.92523	0.117442	1.0127	0.122217	3.96237	0.0521941	0.00824618	1.1984	0.0139769	0.0296372
plasma-690-ATB_25	470.882	1.52545	2.41774	0.0344121	0.524656	0.0806508	0.00143856	2.33631e-05	0.494097	0.0494664	105.128	0.0157035	3.74716	0.000281863	2.08376	3547.82	8.0776	8.0776	0.970751	4.30751	5.3149	2.6351	0.120722	0.0597672	0.0889769	1.35678	0.0877352	0.0148696	0.10929	0.090227	4.82551	9.37867	65.209	0.123873	9.31663	523.302	853.729	3.56143	9.00793	2.65594	0.109846	1.29689	0.0712194	3.65925	0.0645818	0.00189954	1.15597	0.0125169	0.0714312
plasma-681-FMT-AKK-Pas_16	46.3245	1.45651	5.24535	0.0433836	0.813751	0.0523695	0.000975907	1.97777e-05	0.471186	0.0441169	116.939	0.0202225	4.26843	0.00031858	2.20393	3138.93	9.94986	9.94986	1.02933	15.5916	7.79852	3.07867	0.136283	0.0496588	0.0899458	1.51517	0.0951612	0.014809	0.263159	0.236204	3.35339	4.88948	49.9383	0.199243	10.1333	282.192	487.319	9.93644	7.75478	8.83374	0.154236	0.961116	0.0437078	3.00312	0.0587315	0.00227509	0.73524	0.0155995	0.0458298
plasma-670-FMT_5	13.7424	0.181569	7.16074	0.0327671	0.455635	0.100494	0.00118244	2.40873e-05	0.417691	0.057468	180.553	0.0179907	7.93959	#N/A	2.22304	#N/A	15.0852	15.0852	1.33748	9.09919	3.58965	2.94283	0.162968	0.0395959	0.115733	1.40814	0.0587013	0.0137311	0.304967	0.112159	1.92615	4.68236	79.2793	0.19028	10.7619	467.391	1013.98	5.96978	3.7778	5.07373	0.106288	1.15986	0.0728044	3.36009	0.0486173	0.00314214	2.61778	0.0080757	0.0699474
plasma-685-SPF_20	94.7932	0.324961	8.7359	0.0714848	0.713528	0.0611501	0.00140363	4.27988e-05	0.48601	0.0569992	217.96	0.0154597	2.77962	#N/A	3.80506	#N/A	3.36222	3.36222	0.910926	42.6041	2.85248	24.0126	0.203546	0.105186	0.112186	1.81436	0.0665273	0.0166046	0.174167	0.0827738	3.92725	27.0967	131.331	0.0256012	15.2922	506.4	2057.33	0.577427	4.79716	7.87862	0.0501401	1.7318	0.07815	3.1914	0.0417597	0.00565652	1.32598	0.00508754	0.0600904
plasma-675-FMT-AKK_10	353.803	1.52968	1.42964	0.0391643	0.835504	0.0373997	0.00141812	4.26905e-05	0.397149	0.0473235	144.011	0.0139181	4.42941	#N/A	3.01026	#N/A	6.74824	6.74824	1.14533	15.0522	6.39992	6.2441	0.150701	0.0703543	0.0883851	1.70506	0.0723909	0.02772	0.249494	0.0828405	2.63952	8.92502	101.393	0.0665549	12.1342	231.103	1586.09	2.85886	9.36027	4.0895	0.055233	1.19883	0.0700127	3.4744	0.035512	0.00466082	1.34606	0.00487123	0.0868116
plasma-692-ATB_27	108.171	1.58616	10.1931	0.0415111	0.807059	0.0824484	0.000998167	6.52949e-06	0.440286	0.0489935	154.507	0.0172384	2.19286	0.0123825	3.7011	80.7593	3.97535	3.97535	0.92166	3.53345	5.44176	3.06577	0.133257	0.0350574	0.0950909	1.40137	0.0978724	0.0346797	0.22268	0.0830325	2.09028	6.11163	27.8307	0.14284	8.76503	322.199	328.072	4.4377	6.39865	1.57226	0.204086	0.735165	0.0656684	4.41865	0.0463956	0.000504145	0.548069	0.0146638	0.0466561
plasma-683-FMT_18	103.324	0.161649	8.57743	0.080606	0.74965	0.0550168	0.00137133	1.89233e-05	0.491464	0.0434319	203.07	0.0166228	4.1766	#N/A	2.92997	#N/A	5.11579	5.11579	0.930106	11.9334	3.63198	3.68638	0.174685	0.0443849	0.121284	1.44029	0.0565865	0.0293926	0.195213	0.114917	3.33932	7.87839	75.0118	0.0681998	12.5571	225.184	990.873	4.4425	6.05977	3.20936	0.119493	1.09626	0.0935909	2.72973	0.0527874	0.00164939	2.1496	0.0077691	0.0474327
plasma-689-SPF_24	420.159	3.26172	3.30627	0.0504829	1.79101	0.0650854	0.000691553	1.43051e-05	0.469152	0.0558507	118.778	0.0100167	4.91077	0.000802039	5.12817	1246.82	7.10631	7.10631	1.31959	9.40655	3.02726	5.16453	0.161809	0.0720816	0.0926553	1.74636	0.103157	0.0407906	0.163633	0.260697	3.14177	6.6081	37.9639	0.187186	11.4109	111.167	818.403	12.6527	7.96791	3.97471	0.118919	1.22381	0.0935816	3.23161	0.0417225	0.000410647	1.18983	0.00468576	0.0434927
plasma-680-FMT-AKK_15	13.3585	0.142557	7.46986	0.066171	0.885536	0.0269367	0.00127928	2.79605e-05	0.297023	0.0416832	115.907	0.0140919	8.21974	0.00027503	2.77006	3635.97	14.2431	14.2431	1.67553	14.6422	5.28927	2.22344	0.179106	0.0639402	0.11424	1.56781	0.0824102	0.0535671	0.208831	0.102039	2.95746	5.9402	80.0346	0.177962	15.6735	128.015	1254.04	10.6532	7.05987	2.21469	0.0994203	1.58071	0.0820241	2.64465	0.0535093	0.000367247	#N/A	0.00473478	0.0890654
plasma-686-ATB_21	14.8201	0.177507	7.30599	0.0342331	1.3524	0.0677946	0.000881932	1.76036e-05	0.406485	0.04495	213.859	0.0163857	2.63738	#N/A	4.55007	#N/A	4.58233	4.58233	1.13089	4.50778	5.57401	1.52633	0.164823	0.0846287	0.0963612	1.71047	0.0696577	0.0489584	0.215562	0.118481	2.24048	18.5538	83.609	0.0548066	11.4818	137.922	1396.65	8.53807	5.61457	0.206524	0.0766955	1.66427	0.0985661	2.63543	0.0447794	0.0053503	3.12653	0.00450359	0.0746304
plasma-676-FMT-AKK-Pas_11	111.919	1.73503	3.08034	0.0513269	0.617173	0.0687632	0.000857367	1.72256e-05	0.512077	0.0459992	96.0946	0.0178437	4.37135	0.00060856	2.04361	1643.22	15.7134	15.7134	1.39666	9.19579	10.4423	2.63621	0.165682	0.0554905	0.126454	1.31022	0.102653	0.0266717	0.19122	0.221459	4.88331	6.69685	58.7268	0.267567	14.0773	239.78	572.007	7.71824	12.3112	10.3746	0.128798	0.904005	0.0636195	3.76313	0.0395676	0.00162887	0.947525	0.00793016	0.0455306
plasma-682-FMT_17	46.6532	1.62257	3.06972	0.0321123	0.663702	0.0602163	0.000568997	1.27123e-05	0.453123	0.0447838	186.973	0.0139907	3.97033	0.000546051	4.01347	1831.33	5.52912	5.52912	1.13683	9.62925	3.79997	3.93608	0.179793	0.0559443	0.1484	1.21154	0.058731	0.0439261	0.229797	0.103385	2.68199	5.45358	35.3926	0.156223	14.2595	158.874	544.956	4.72327	6.8206	7.59336	0.164182	0.792777	0.0646611	3.04156	0.0420558	0.00387863	1.02255	0.00666541	0.061374
plasma-688-ATB_23	38.8956	0.420528	8.35792	0.0343081	0.706359	0.102079	0.000603145	1.11988e-05	0.476673	0.0503078	171.114	0.0156199	2.8911	#N/A	3.14101	#N/A	6.23331	6.23331	1.17531	2.43249	5.41108	5.75388	0.116982	0.0332579	0.105529	1.10853	0.0622475	0.0424989	0.218825	0.0911172	2.06403	10.3931	50.7071	0.122928	9.08272	229.428	700.515	6.29321	7.81009	0.915059	0.158657	1.10921	0.0674024	2.87843	0.041973	0.00152562	1.35581	0.00712299	0.066491
plasma-687-SPF_22	76.7209	1.12461	3.68463	0.059412	1.01351	0.0607629	0.000538696	1.01806e-05	0.403674	0.0451895	200.456	0.0168419	2.89522	#N/A	3.94384	#N/A	4.23754	4.23754	1.02591	11.3535	3.0228	7.03815	0.182485	0.0780813	0.0922812	1.97749	0.104373	0.0505278	0.143177	0.146617	5.35353	8.00638	42.4726	0.0997712	12.999	142.837	499.502	10.4065	10.9934	2.55883	0.152837	0.576279	0.0867544	3.58366	0.0494562	0.00201608	0.685804	0.00681164	0.0344673
plasma-679-FMT-AKK_14	34.2814	0.200391	9.93581	0.0670796	0.81101	0.0368731	0.000926582	1.9133e-05	0.350688	0.0419822	137.142	0.0152325	5.88071	#N/A	2.27975	#N/A	12.3042	12.3042	1.33225	28.1252	4.37522	5.38629	0.157055	0.0976441	0.103419	1.51862	0.0743527	0.0645218	0.170852	0.0786148	4.18364	6.22435	86.3937	0.14242	12.069	156.227	806.68	1.69942	26.8878	0.952535	0.113604	1.00111	0.093338	2.80359	0.0469071	0.00149913	1.39378	0.0047248	0.0762914
plasma-673-FMT-AKK-Pas_8	112.066	1.56714	3.07399	0.0350033	0.911066	0.0277292	0.00105221	4.0232e-05	0.360377	0.0506118	201.929	0.0180634	11.5652	#N/A	2.83843	#N/A	14.0846	14.0846	1.55162	12.3212	4.10434	4.57403	0.166471	0.0676059	0.0964292	1.72635	0.0974201	0.0582872	0.202159	0.196593	3.64309	3.52587	83.503	0.168672	13.6421	74.6113	1042.08	16.1104	9.74627	0.79056	0.0824828	1.15045	0.0707214	3.13609	0.0373917	0.00241064	1.54925	0.00741305	0.0453164
plasma-691-ATB_26	170.53	2.51817	7.18393	0.0321272	0.817521	0.0514873	0.000896032	5.03832e-06	0.393438	0.0375339	159.029	0.0152802	3.09296	0.00498643	3.78728	200.544	5.04625	5.04625	1.15439	4.68679	6.38498	3.86865	0.13058	0.0667542	0.0893624	1.46124	0.128213	0.0672649	0.0608937	0.0667782	8.0058	8.21913	42.0474	0.120013	11.9046	494.806	519.408	1.42049	7.9956	0.458165	0.163209	1.07215	0.0727751	3.42032	0.0423664	0.00194307	0.855665	0.00867699	0.0458026
plasma-678-FMT_13	254.891	5.10463	5.5154	0.104331	0.704328	0.0555198	0.000914494	3.27071e-05	0.67608	0.0373373	217.631	0.0132745	3.18263	0.00129736	3.29095	770.793	3.9902	3.9902	0.987404	9.85206	4.25016	6.13106	0.204757	0.0511927	0.117148	1.74784	0.0984179	0.0625734	0.18333	0.182838	3.77196	6.82426	44.3152	0.0900414	13.909	140.53	547.766	7.03335	8.34002	3.99736	0.151114	0.878018	0.0625899	2.22359	0.0352249	0.000904497	0.861721	0.007219	0.0690809
plasma-677-FMT-AKK-Pas_12	1460.39	0.329394	9.04762	0.0350437	0.786387	0.0417122	0.000792289	1.02667e-05	0.410194	0.0438049	124.884	0.015004	3.99713	#N/A	2.82295	#N/A	13.1622	13.1622	1.53335	11.5748	7.99312	8.32777	0.231061	0.0770444	0.12917	1.78882	0.0976736	0.0491346	0.196545	0.218024	4.46997	9.06528	74.0006	0.177867	15.071	104.27	879.336	6.44164	11.3597	3.72718	0.0763146	1.20732	0.0589738	2.85394	0.0344844	0.00279177	1.28247	0.00368687	0.0418977
plasma-693-SPF_28	64.7774	0.208431	9.17821	0.0598976	1.19273	0.0575519	0.000416301	1.98682e-05	0.491061	0.0421764	188.168	0.0113502	3.82587	0.000411094	3.66398	2432.53	5.7807	5.7807	1.3558	27.4009	2.44332	5.78981	0.197954	0.0746241	0.10154	1.94952	0.120888	0.0731088	0.147486	0.268642	4.83613	8.55624	54.5221	0.106025	14.7248	57.8927	875.006	32.1451	7.52936	2.21028	0.110236	0.898387	0.0842696	2.86023	0.0403052	0.00129491	2.57701	0.00468934	0.0631681
plasma-672-FMT-AKK_7	390.107	1.88676	60.1299	0.0661986	0.727629	0.0349777	0.00151031	5.02201e-05	0.449088	0.0455415	172.476	0.0186768	4.62525	0.00164803	2.79884	606.784	12.5732	12.5732	1.59814	14.0166	2.49799	4.15806	0.161538	0.0348365	0.100153	1.61292	0.077631	0.0558614	0.155794	0.0835178	4.27192	6.11101	69.4523	0.181034	12.2573	176.467	777.539	5.32797	8.08558	4.31989	0.115022	1.06957	0.0696304	3.30245	0.0336603	0.00266481	0.636839	0.00477982	0.0594795
plasma-694-ATB_29	518.667	1.05473	6.08875	0.0244104	0.762717	0.0541295	0.000867361	8.12754e-06	0.396405	0.0398183	162.764	0.0158146	2.74083	#N/A	3.84167	#N/A	5.20347	5.20347	1.24525	5.4936	5.26398	1.1324	0.14972	0.0479515	0.111592	1.34167	0.153771	0.074924	0.156704	0.204264	3.55211	6.82925	41.8009	0.124482	13.0551	64.8697	462.226	7.4122	11.0728	0.478576	0.153325	0.560754	0.0761425	4.40084	0.0300003	0.00154886	0.575765	0.0111684	0.0434405
plasma-671-FMT-AKK-Pas_6	96.62	3.5715	5.69989	0.0565165	0.858657	0.0398182	0.000342476	4.94537e-06	0.333336	0.0558866	149.759	0.0193251	2.98709	0.00136948	3.33352	730.206	9.3694	9.3694	1.57598	18.5149	6.07667	4.13909	0.164876	0.0653504	0.119813	1.37611	0.078743	0.0391144	0.172818	0.141924	5.19324	6.34443	51.2234	0.182913	14.9768	84.8286	640.532	10.9526	6.28279	12.6967	0.125852	0.561474	0.0613999	3.90024	0.0431621	0.00745085	0.60978	0.00869558	0.0435201
plasma-695-SPF_30	32.3992	2.14067	4.76216	0.0526612	0.655654	0.0743527	0.000584568	1.19756e-05	0.48491	0.0471421	169.019	0.0155643	2.51662	0.000399836	3.45541	2501.03	5.45288	5.45288	1.15604	16.2644	2.29415	3.66221	0.165556	0.0634551	0.118736	1.39432	0.0899806	0.0349499	0.141019	0.215404	5.46213	7.27642	36.9081	0.147742	13.1348	122.661	419.134	12.7435	8.46569	12.7046	0.172087	0.57812	0.0705733	3.30433	0.0347171	0.00198731	1.18249	0.00958356	0.0401666
plasma-674-FMT-AKK_9	213.501	0.993803	12.1789	0.0584718	0.85451	0.0554565	0.0011019	3.10317e-05	0.523526	0.0480561	153.485	0.0177939	3.25826	0.000337369	2.29895	2964.11	11.1995	11.1995	1.54875	11.0676	4.42617	2.38905	0.135643	0.0592859	0.0860137	1.57699	0.0794718	0.0384011	0.131417	0.156465	5.97282	4.76738	45.5514	0.245864	11.0989	195.726	457.643	7.2233	8.5544	5.62711	0.173043	0.686115	0.0670065	4.32469	0.0376382	0.00238745	1.2622	0.0078687	0.0230902
plasma-669-FMT_4	349.756	0.504996	6.04395	0.0420601	0.561584	0.141638	0.000809701	2.58233e-05	0.647822	0.0539529	185.343	0.0175947	3.41037	0.0020645	2.59073	484.379	6.88773	6.88773	1.1266	15.6451	3.13882	8.78952	0.159189	0.055009	0.0778957	2.04362	0.102358	0.0375768	0.170834	0.0547532	3.61308	3.4564	32.5195	0.211803	9.58304	1066.35	346.008	0.556283	12.0266	12.2326	0.148072	0.502605	0.0594452	4.29519	0.0384325	0.00185095	2.65395	0.0096925	0.0417345
[truncated: 1 more columns]

## Sheet: RatioLog2Cen
	Uridine.UMP	Xanthine.HXanthine	HXanthine.Inosine	Uracil.Uridine	AcCarn.Carn	Glyc3P.Glycerol	Taurocholate.Tau	TCDCholate.Tau	Glyc3P.GPCho	Stearate.Linolenate	Fum.Suc	Pyr.Lac	aHGA.aKG	PEP.Oaa	Citrate.Oaa	Pyr.PEP	Pyr.Malate	Oaa.Malate	Fum.Malate	Xylose.Xylitol	Rib5P.Ribose	Sucrose.Raffinose	Cit.Arg	Tyr.Phe	Orn.Arg	Cit.Orn	Put.Orn	Kyn.Trp	Ser.Gly	Pyr.Ala	Pyr.Ser	aKG.Glu	Oaa.Asp	Asp.Malate	Urea.Arginine	Val.KIV	BetaAla.Asp	HOPro.Pro	PCr.Creatine	Anthr.Kyn	Asp.NAcAsp	GABA.Glu	NAAG.NAcAsp	Spmd.Put	Spr.Spmd	SAM.Met	GSH.GSSG	Glu.Oxoproline	AcSpmd.Spmd
plasma-666-FMT_1	3.698	#N/A	#N/A	-0.382745	-0.125683	-0.0217651	0.693475	1.12587	0.380284	-0.443417	-0.189628	0.00618933	0.00272729	#N/A	-0.31867	#N/A	-0.491815	-0.491815	-0.452837	-0.728726	-0.271116	-0.396274	0.0941807	-1.25912	0.120846	-0.0266649	-0.375994	-2.27199	0.221408	0.587757	-0.259445	-2.36105	-1.0036	0.511783	-0.234273	-0.113825	-1.05032	1.78751	-1.26764	0.764884	0.948587	-1.26602	-0.0914604	0.405675	0.264492	-0.728223	1.15863	3.39999	-0.706327
plasma-667-FMT-AKK-Pas_2	-1.76686	-2.10647	0.344889	-0.420507	-0.0393898	-0.224901	0.83084	0.647204	-0.460412	0.0354672	-0.153172	0.320814	0.612444	-1.07729	-0.406741	1.07729	0.55291	0.55291	-0.0842119	0.375628	0.082044	-1.42293	0.0703459	-0.609273	0.30471	-0.234365	-0.761424	-2.7259	0.35248	0.132085	-0.414709	-0.205482	0.0958358	0.457074	0.0832784	0.399566	0.393267	1.56274	-0.427757	0.386953	0.13758	0.209702	-0.820578	0.156635	0.432298	0.891116	1.67836	1.65713	-0.761987
plasma-684-SPF_19	-1.30675	0.906287	-0.746482	0.245733	0.166227	0.106586	0.95299	0.913103	0.207905	-0.0549604	-0.085306	-0.260407	0.517561	-0.368592	0.0530993	0.368592	-0.281068	-0.281068	-0.11169	0.565518	-0.102138	-0.15743	-0.102769	-0.38581	0.00243028	-0.105199	0.407046	-2.46081	0.256067	1.34316	-0.176178	-0.402045	0.0973424	-0.378411	0.183864	-0.766292	0.404904	1.85621	-0.114147	3.11116	-0.393753	-0.224639	-0.517953	0.437391	0.180508	0.370811	-1.20556	1.17408	-0.0710507
plasma-668-FMT-AKK_3	0.631508	0.919246	0.377995	0.255182	0.159912	-0.212807	0.459381	0.0872951	-0.295932	0.115658	-0.541375	-0.0983442	0.666527	#N/A	-0.227522	#N/A	0.814624	0.814624	0.0881721	0.797158	0.038029	0.262439	-0.381165	0.179737	-0.354328	-0.0268367	-0.188011	-1.32079	-0.104646	-0.0700735	-0.085372	-0.735504	-0.0361308	0.850755	-0.466867	0.0740196	0.138816	0.924919	0.00388022	-0.171227	-0.0522664	0.132676	0.789621	0.22749	0.26192	1.9932	-0.0498094	0.705992	-0.745455
plasma-690-ATB_25	2.05461	0.865653	-1.35528	-0.446041	-0.607328	0.518702	0.598511	0.306863	0.160732	0.099104	-0.562188	-0.00576936	-0.128505	-1.53882	-0.53007	1.53882	0.102222	0.102222	-0.308579	-1.34444	0.263437	-0.593217	-0.408947	0.0915754	-0.230024	-0.178923	0.0570521	-1.03883	-0.717367	-0.59195	0.415991	0.532285	0.23901	-0.136788	-0.380674	1.47797	0.249735	-0.878804	0.189036	-0.310552	-0.148732	0.48953	0.0105223	0.112672	0.569161	-0.124878	-0.101813	0.546823	0.523689
plasma-681-FMT-AKK-Pas_16	-1.29091	0.798934	-0.237899	-0.111807	0.0258876	-0.104261	0.038702	0.0665094	0.0922335	-0.0660158	-0.408587	0.359112	0.0594047	-1.36216	-0.44918	1.36216	0.402971	0.402971	-0.224042	0.511401	0.816596	-0.368772	-0.234034	-0.175729	-0.214398	-0.0196362	0.174269	-1.04473	0.550407	0.796451	-0.109071	-0.407419	-0.145914	0.548886	-0.259456	0.587	-0.559178	0.601468	-0.0270743	1.42325	0.34093	0.0572509	-0.693855	-0.172414	0.432168	0.135401	-0.754627	0.864438	-0.11658
plasma-670-FMT_5	-3.04405	-2.20499	0.211172	-0.516707	-0.810821	0.83605	0.31565	0.350903	-0.0816242	0.315412	0.21808	0.190399	0.954763	#N/A	-0.436722	#N/A	1.00336	1.00336	0.153761	-0.265558	-0.30276	-0.433872	0.023955	-0.50243	0.149273	-0.125318	-0.52271	-1.15376	0.763125	-0.27803	-0.908969	-0.469863	0.520885	0.482476	-0.172615	1.31496	0.497914	-0.133584	-1.06461	0.623271	-0.196238	0.328414	0.0422791	-0.0103749	0.159504	0.601221	1.07743	-0.0853983	0.493407
plasma-685-SPF_20	-0.257901	-1.36524	0.498019	0.60868	-0.16373	0.119368	0.563047	1.1802	0.136925	0.303597	0.48972	-0.028345	-0.559413	#N/A	0.338663	#N/A	-1.16229	-1.16229	-0.400346	1.96162	-0.634386	2.59464	0.344715	0.907091	0.104365	0.24035	-0.342158	-0.879623	-0.045058	-0.716334	0.118828	2.06294	1.24907	-2.41136	0.334246	1.4306	1.51866	-3.50355	-0.719981	1.25817	-1.28018	0.906743	0.144498	-0.0846848	-0.0598553	1.44939	0.0961412	-0.752017	0.27427
plasma-675-FMT-AKK_10	1.64219	0.869654	-2.11329	-0.259416	0.0639469	-0.589961	0.577867	1.17655	-0.154383	0.0352121	-0.108165	-0.17989	0.112813	#N/A	0.00062926	#N/A	-0.157195	-0.157195	-0.0699917	0.460605	0.531449	0.651416	-0.0889436	0.326859	-0.239651	0.150707	-0.220295	-0.140279	0.473477	-0.715173	-0.454415	0.460756	0.875833	-1.03303	0.000524202	0.29886	1.14336	-1.19582	0.24439	0.312149	-1.14061	0.376095	-0.014131	0.0378878	-0.293659	1.17006	0.117825	-0.8147	0.805023
plasma-692-ATB_27	-0.0674408	0.92196	0.720578	-0.175459	0.0139749	0.550504	0.0712403	-1.53232	-0.00562065	0.0852447	-0.00666538	0.12877	-0.901486	3.91834	0.298695	-3.91834	-0.920624	-0.920624	-0.383446	-1.63022	0.29747	-0.374829	-0.266423	-0.67806	-0.134147	-0.132276	0.214798	0.182887	0.309443	-0.711832	-0.790993	-0.0855421	-0.989384	0.0687591	-0.468723	0.778274	-1.13003	-0.561448	-0.304394	-1.06693	0.744963	-0.32939	-0.106549	0.384729	0.0920212	-2.03861	-1.17848	0.775204	-0.0907984
plasma-683-FMT_18	-0.133583	-2.37265	0.471608	0.78193	-0.0924829	-0.0331143	0.529466	0.00279821	0.153023	-0.0885894	0.38764	0.0763075	0.0280277	#N/A	-0.0383723	#N/A	-0.556749	-0.556749	-0.370286	0.125636	-0.285847	-0.108871	0.124118	-0.337709	0.216868	-0.0927502	-0.575646	-0.0557486	0.119521	-0.242993	-0.115133	0.280801	0.441057	-0.997806	0.0499473	0.261431	0.464657	-0.559889	-0.382896	-0.0374916	-0.0272902	0.247054	0.40462	-0.310117	0.278225	-0.32859	0.793156	-0.141238	-0.066984
plasma-689-SPF_24	1.89018	1.96205	-0.903733	0.106839	1.164	0.209346	-0.458201	-0.400835	0.0859942	0.274229	-0.386069	-0.654445	0.261648	-0.030141	0.769186	0.030141	-0.0826046	-0.0826046	0.134337	-0.21763	-0.54859	0.37756	0.0136575	0.361851	-0.171581	0.185239	0.290669	0.417033	-0.135066	0.938795	-0.203112	0.0271373	-0.541432	0.458828	-0.0881399	-0.756953	0.188767	0.950111	0.0120402	0.271074	-0.0342286	0.405844	0.404478	-0.0666221	-0.0611418	-2.33455	-0.060162	-0.870701	-0.192092
plasma-680-FMT-AKK_15	-3.08493	-2.55397	0.272145	0.497242	0.147851	-1.06341	0.429221	0.566023	-0.573489	-0.147881	-0.421369	-0.161991	1.00479	-1.57423	-0.119342	1.57423	0.920487	0.920487	0.478865	0.420762	0.256464	-0.838285	0.160177	0.188944	0.130539	0.0296382	-0.0332816	0.810144	0.216809	-0.414464	-0.290329	-0.126587	0.534563	0.385924	0.369775	-0.553359	0.804464	0.701952	-0.162518	-0.572673	-0.292602	0.775045	0.214301	-0.355796	0.297823	-2.4957	#N/A	-0.855688	0.842
plasma-686-ATB_21	-2.93513	-2.23763	0.240143	-0.453563	0.758753	0.268183	-0.107374	-0.101497	-0.12086	-0.0390243	0.462322	0.0555801	-0.635195	#N/A	0.596632	#N/A	-0.715624	-0.715624	-0.0882953	-1.27888	0.332112	-1.38101	0.0402838	0.593367	-0.115002	0.155285	-0.275821	0.680354	0.262578	-0.198922	-0.690879	1.51654	0.597598	-1.31322	-0.0792015	-0.445823	0.959856	0.382648	-0.492986	-3.99539	-0.667001	0.849356	0.479344	-0.360838	0.0408667	1.36909	1.33365	-0.927911	0.586899
plasma-676-FMT-AKK-Pas_11	-0.0183014	1.05138	-1.00585	0.130757	-0.373025	0.288649	-0.148129	-0.132818	0.212299	-0.00573822	-0.691813	0.17856	0.0937779	-0.428414	-0.558142	0.428414	1.06222	1.06222	0.216228	-0.250323	1.23777	-0.592612	0.0477839	-0.0155379	0.277083	-0.229299	0.283596	-0.195896	0.0897101	0.703461	0.433171	0.0463827	0.0879586	0.974257	0.214812	0.352038	-0.328011	0.23701	0.63974	1.65521	0.0808923	-0.0311277	-0.152279	0.153059	-0.137649	-0.346649	-0.388677	-0.111636	-0.126027
plasma-682-FMT_17	-1.28071	0.954704	-1.01083	-0.54583	-0.268163	0.0971661	-0.739621	-0.571143	0.0358419	-0.0443682	0.268488	-0.172387	-0.0450415	-0.584778	0.415591	0.584778	-0.444655	-0.444655	-0.080734	-0.183873	-0.220617	-0.014318	0.1657	-0.00378783	0.507965	-0.342265	-0.521982	0.523874	0.354833	-0.395549	-0.431386	-0.249896	-0.642613	0.197958	0.233372	-0.241789	-0.397905	-0.471475	-0.212262	1.20496	0.431084	-0.220543	-0.128849	-0.154061	-0.0496629	0.905024	-0.278742	-0.362291	0.304764
plasma-688-ATB_23	-1.54308	-0.993306	0.434207	-0.450408	-0.178299	0.858622	-0.655535	-0.754022	0.108939	0.123437	0.140619	-0.0134711	-0.502684	#N/A	0.0619726	#N/A	-0.271707	-0.271707	-0.0327058	-2.16886	0.289312	0.533458	-0.454355	-0.754084	0.0161094	-0.470464	-0.438089	0.476222	0.284254	-0.577785	-0.809227	0.680458	-0.123873	-0.147834	-0.417358	0.288363	-0.0356269	-0.0574646	-0.016822	-1.84784	0.381697	0.263996	-0.0689474	-0.233594	-0.0525048	-0.441125	0.128245	-0.266503	0.420295
plasma-687-SPF_22	-0.563066	0.42585	-0.747416	0.341799	0.342586	0.110204	-0.818571	-0.891549	-0.130873	-0.031358	0.368943	0.0952011	-0.500627	#N/A	0.390344	#N/A	-0.828477	-0.828477	-0.228843	0.0537725	-0.550719	0.82412	0.187142	0.477198	-0.177417	0.364559	0.307572	0.725872	-0.327726	0.108471	0.5658	0.30405	-0.379527	-0.44895	0.099847	-0.395302	-0.523553	0.668149	0.476412	-0.364289	0.327785	-0.680692	0.29519	0.0825581	0.184183	-0.0389707	-0.855044	-0.330983	-0.527638
plasma-679-FMT-AKK_14	-1.72526	-2.06269	0.6837	0.516918	0.0210202	-0.610419	-0.0361235	0.0186915	-0.333872	-0.137567	-0.178669	-0.0497019	0.521689	#N/A	-0.400385	#N/A	0.709373	0.709373	0.148114	1.3625	-0.0172497	0.438214	-0.0293704	0.799754	-0.0130225	-0.0163479	-0.181719	1.07858	-0.0727805	-0.790707	0.210068	-0.0591755	0.644865	0.064508	-0.00725296	-0.266034	0.167953	-1.94622	1.76672	-1.78993	-0.100206	0.116073	0.400718	-0.271602	0.107838	-0.466402	0.168092	-0.858733	0.618657
plasma-673-FMT-AKK-Pas_8	-0.0164075	0.904553	-1.00883	-0.421465	0.188856	-1.02158	0.147312	1.09097	-0.294557	0.132127	0.379505	0.196213	1.49742	#N/A	-0.0841637	#N/A	0.904339	0.904339	0.36802	0.17178	-0.109452	0.20239	0.0546332	0.26937	-0.113984	0.168617	0.208115	0.931975	0.169962	0.53163	0.0104735	-0.87912	0.595767	0.308572	0.169513	-1.33221	0.537354	1.29866	0.302689	-2.05883	-0.562048	0.316666	0.000399342	-0.109908	-0.219248	0.218892	0.320655	-0.208918	-0.13283
plasma-691-ATB_26	0.58927	1.5888	0.215837	-0.545163	0.0325566	-0.12877	-0.0844917	-1.90635	-0.167925	-0.299151	0.0349533	-0.0451862	-0.405312	2.60612	0.331903	-2.60612	-0.576495	-0.576495	-0.0586194	-1.22269	0.528078	-0.0392469	-0.295702	0.251079	-0.223786	-0.0719162	0.604361	1.13865	-1.56116	-1.02613	1.14636	0.341887	-0.394043	-0.182452	-0.0270318	1.39719	-0.467176	-2.20487	0.0170452	-2.84584	0.422509	0.214978	0.0416975	0.0152566	-0.0390466	-0.0921899	-0.535794	0.0182095	-0.117436
plasma-678-FMT_13	1.16912	2.60823	-0.165472	1.15413	-0.182452	-0.0199839	-0.0550677	0.792236	0.613132	-0.30673	0.487546	-0.24819	-0.364081	0.663698	0.129247	-0.663698	-0.915244	-0.915244	-0.28404	-0.15087	-0.0590865	0.62506	0.353276	-0.131842	0.16681	0.186466	0.222817	1.03435	0.0289188	0.426987	0.0606268	0.0735744	-0.31826	-0.596985	0.197467	-0.418802	-0.390484	0.10295	0.0778913	0.279272	0.31142	-0.0732093	-0.175818	-0.605983	-0.30537	-1.19534	-0.52562	-0.247187	0.475423
plasma-677-FMT-AKK-Pas_12	3.68752	-1.34569	0.548602	-0.4198	-0.0234598	-0.432517	-0.262015	-0.879393	-0.107755	-0.0762539	-0.313748	-0.0715078	-0.0353376	#N/A	-0.0920539	#N/A	0.806628	0.806628	0.350938	0.0816248	0.852154	1.06685	0.527638	0.45791	0.307743	0.219895	0.211865	0.685536	0.129334	0.680908	0.305575	0.483253	0.421477	0.385151	0.31322	-0.849348	0.292372	-0.0238331	0.523693	0.178311	-0.674182	0.386282	-0.261673	-0.245921	-0.336025	0.430654	0.0480092	-1.21659	-0.245994
plasma-693-SPF_28	-0.807194	-2.00594	0.569275	0.353541	0.577494	0.0318765	-1.19042	0.0730954	0.151842	-0.130911	0.277677	-0.474133	-0.0985117	-0.994346	0.284152	0.994346	-0.380462	-0.380462	0.173394	1.32486	-0.857764	0.542439	0.304529	0.411862	-0.0394821	0.344011	0.519492	1.25884	-0.284951	0.982105	0.419164	0.399878	-0.0192187	-0.361243	0.279696	-1.69822	0.285249	2.29526	-0.069634	-0.575549	-0.143615	-0.0401227	0.253265	-0.242745	-0.111002	-0.677677	1.05479	-0.8696	0.346331
plasma-672-FMT-AKK_7	1.78311	1.17233	3.28107	0.497844	-0.135496	-0.68655	0.66873	1.4109	0.0229374	-0.0201656	0.152054	0.244393	0.175231	1.00886	-0.104429	-1.00886	0.740577	0.740577	0.410642	0.357764	-0.825839	0.0648339	0.0112335	-0.687181	-0.059327	0.0705605	-0.11947	0.870647	-0.205889	-0.703425	0.240196	-0.0856891	0.329962	0.410615	0.0150927	-0.0902757	0.114871	-0.297677	0.0331904	0.391218	-0.0823082	0.211502	-0.0220302	-0.035337	-0.370919	0.363508	-0.961913	-0.84203	0.259528
plasma-694-ATB_29	2.19405	0.333299	-0.0227919	-0.941463	-0.0675528	-0.0565705	-0.131409	-1.21648	-0.157088	-0.213915	0.068442	0.00440206	-0.579687	#N/A	0.352476	#N/A	-0.532231	-0.532231	0.0506809	-0.993545	0.249551	-1.8117	-0.0983665	-0.226203	0.0967113	-0.195078	0.866608	1.29422	-0.197479	0.586853	-0.0260144	0.0746284	-0.402527	-0.129704	0.106063	-1.53406	-0.635446	0.17864	0.486783	-2.78296	0.332378	-0.720091	0.106954	0.378904	-0.536993	-0.419322	-1.10736	0.382364	-0.193822
plasma-671-FMT-AKK-Pas_6	-0.230362	2.09295	-0.118004	0.269715	0.103382	-0.499559	-1.47204	-1.93322	-0.407086	0.275158	-0.0516961	0.293624	-0.455561	0.741739	0.147788	-0.741739	0.316251	0.316251	0.390495	0.759318	0.456676	0.0582365	0.0407398	0.220418	0.199259	-0.158519	-0.0989528	0.356498	-0.0562756	0.0615424	0.521946	-0.0316087	-0.109259	0.425509	0.304173	-1.14705	-0.164773	0.741946	-0.330756	1.9466	0.0475109	-0.71824	-0.203511	0.204689	-0.0122021	1.84688	-1.02455	0.0212971	-0.191182
plasma-695-SPF_30	-1.80672	1.35448	-0.377321	0.167784	-0.285765	0.401398	-0.700669	-0.657267	0.133655	0.0296701	0.122848	-0.0186095	-0.702813	-1.03441	0.199599	1.03441	-0.464688	-0.464688	-0.0565615	0.57235	-0.948646	-0.118362	0.0466837	0.177956	0.186235	-0.139551	0.0935098	0.194083	-0.349633	0.663463	0.594775	0.16613	-0.582124	0.117436	0.114843	-0.615	-0.776633	0.960426	0.0994679	1.9475	0.498922	-0.676091	-0.00262401	-0.0345173	-0.326321	-0.0597049	-0.069082	0.161575	-0.306869
plasma-674-FMT-AKK_9	0.913483	0.247453	0.977379	0.318784	0.0963973	-0.0216311	0.213884	0.716377	0.244198	0.0573743	-0.0162388	0.174528	-0.3302	-1.27949	-0.388283	1.27949	0.573651	0.573651	0.365356	0.0169728	-0.000544379	-0.734642	-0.240823	0.0799089	-0.278887	0.0380646	-0.0856608	0.329943	-0.451369	0.202261	0.723723	-0.443902	-0.278564	0.852215	-0.128144	0.0591591	-0.649822	0.141397	0.114506	0.77262	0.506915	-0.429009	-0.0774451	0.353722	-0.209768	0.204943	0.0250324	-0.122861	-1.10559
plasma-669-FMT_4	1.62559	-0.729236	-0.033445	-0.156505	-0.509197	1.33115	-0.230652	0.451304	0.551535	0.224355	0.255854	0.158285	-0.264372	1.33391	-0.215901	-1.33391	-0.127677	-0.127677	-0.093773	0.516347	-0.496384	1.14471	-0.00989246	-0.0281109	-0.421911	0.412018	0.279444	0.298639	-0.0729281	-1.31256	-0.00146014	-0.907828	-0.764757	0.63708	-0.339999	2.50493	-1.05324	-3.55737	0.606	1.89288	0.282085	-0.878033	-0.250187	0.343845	-0.179641	-0.162255	1.09723	0.177884	-0.251624
[truncated: 1 more columns]
